# Supplementary material
Source: Preprints.org preprint supplement (doi:10.20944/preprints202004.0323.v1)
Supplement: Supplementary file 1 [file supplementary]

Archive with 32 entries (32 files):
- Supplementary_Figures.pdf
- __MACOSX/._Supplementary_Figures.pdf
- Supplementary_Methods.pdf
- __MACOSX/._Supplementary_Methods.pdf
- Supplementary_Table_1_DE_analysis_microarray.xlsx
- __MACOSX/._Supplementary_Table_1_DE_analysis_microarray.xlsx
- Supplementary_Table_2_Gene_level_DESeq2_differential_analysis.xlsx
- __MACOSX/._Supplementary_Table_2_Gene_level_DESeq2_differential_analysis.xlsx
- Supplementary_Table_3_GO_enrichment_analysis_metascape_results.xlsx
- __MACOSX/._Supplementary_Table_3_GO_enrichment_analysis_metascape_results.xlsx
- Supplementary_Table_4_list_of_overlapping_genes_with_siRNA-ER_experiment.xlsx
- __MACOSX/._Supplementary_Table_4_list_of_overlapping_genes_with_siRNA-ER_experiment.xlsx
- Supplementary_Table_5_GO_enrichment_analysis_of_overlapping_genes.xlsx
- __MACOSX/._Supplementary_Table_5_GO_enrichment_analysis_of_overlapping_genes.xlsx
- Supplementary_Table_6_Isoform_level_DESeq2_differential_analysis.xlsx
- __MACOSX/._Supplementary_Table_6_Isoform_level_DESeq2_differential_analysis.xlsx
- Supplementary_Table_7_GO_enrichment_analysis_parent_genes_of_DE_isoforms.xlsx
- __MACOSX/._Supplementary_Table_7_GO_enrichment_analysis_parent_genes_of_DE_isoforms.xlsx
- Supplementary_Table_8_Isoform_switch_analysis_isoforms_features.xlsx
- __MACOSX/._Supplementary_Table_8_Isoform_switch_analysis_isoforms_features.xlsx
- Supplementary_Table_9_Differential_splicing_results_upon_DSCAM-AS1_silencing.xlsx
- __MACOSX/._Supplementary_Table_9_Differential_splicing_results_upon_DSCAM-AS1_silencing.xlsx
- Supplementary_Table_10_GO_enrichment_analysis_spliced_genes.xlsx
- __MACOSX/._Supplementary_Table_10_GO_enrichment_analysis_spliced_genes.xlsx
- Supplementary_Table_11_RBP_binding_motif_enrichment_Analysis.xlsx
- __MACOSX/._Supplementary_Table_11_RBP_binding_motif_enrichment_Analysis.xlsx
- Supplementary_Table_12_Whippet_genes_with_Tandem_APA_sites.xlsx
- __MACOSX/._Supplementary_Table_12_Whippet_genes_with_Tandem_APA_sites.xlsx
- Supplementary_Table_13_Primer_used_for_the_analysis.xlsx
- __MACOSX/._Supplementary_Table_13_Primer_used_for_the_analysis.xlsx
- Uncropped_WB_images.pdf
- Supplementary_Table_14_WB_densitometry_readings_and_intensity_ratio_calculation.xlsx
