# Supplementary material
Source: Preprints.org preprint supplement (doi:10.20944/preprints202004.0323.v1)
Supplement: Supplementary file 1 [file supplementary]

## Sheet: Full_list_of_switching_genes
isoform_id	gene_id	gene_name	gene_biotype	iso_biotype	gene_overall_mean	gene_value_1	gene_value_2	gene_stderr_1	gene_stderr_2	gene_log2_fold_change	gene_q_value	iso_overall_mean	iso_value_1	iso_value_2	iso_stderr_1	iso_stderr_2	iso_log2_fold_change	iso_q_value	IF_overall	IF1	IF2	dIF	isoform_switch_q_value	gene_switch_q_value	PTC	domain_identified	codingPotentialValue	codingPotential	signal_peptide_identified	IR	switchConsequencesGene
ENST00000462982.1	ENSG00000154813.9	DPH3	protein_coding	processed_transcript	25.636	24.5245	26.3769	0.60634	1.0069	0.10501	0.574352	5.655	1.06238	8.71675	0.110059	0.558399	3.02464	4.02e-11	0.2152	0.04325	0.329833	0.286583	3e-57	3e-57	NA	NA	0.0844353	FALSE	NA	0	FALSE
ENST00000285082.8	ENSG00000154813.9	DPH3	protein_coding	processed_transcript	25.636	24.5245	26.3769	0.60634	1.0069	0.10501	0.574352	3.13448	5.43328	1.60195	0.561427	0.578899	-1.75567	0.0383173	0.12398	0.2211	0.0592333	-0.161867	0.116496	3e-57	NA	NA	0.0336562	FALSE	NA	0	FALSE
ENST00000383775.4	ENSG00000154813.9	DPH3	protein_coding	protein_coding	25.636	24.5245	26.3769	0.60634	1.0069	0.10501	0.574352	9.75676	10.2313	9.4404	0.116699	0.568831	-0.115952	0.699353	0.38168	0.41735	0.3579	-0.05945	0.410696	3e-57	FALSE	yes	0.023309	FALSE	no	0	FALSE
ENST00000488423.1	ENSG00000154813.9	DPH3	protein_coding	protein_coding	25.636	24.5245	26.3769	0.60634	1.0069	0.10501	0.574352	7.08972	7.79757	6.61783	0.181844	0.679358	-0.236337	0.563268	0.27912	0.3183	0.253	-0.0653	0.749405	3e-57	FALSE	yes	0.27004	NA	no	0	FALSE
ENST00000345714.8	ENSG00000104205.12	SGK3	protein_coding	protein_coding	12.5835	12.856	12.4018	0.316049	0.445926	-0.0518506	0.886347	5.7851	8.34375	4.07934	0.146906	0.269895	-1.03056	8.93e-12	0.4567	0.64915	0.3284	-0.32075	5e-18	6.93e-52	FALSE	yes	1	TRUE	no	0	FALSE
ENST00000396596.2	ENSG00000104205.12	SGK3	protein_coding	protein_coding	12.5835	12.856	12.4018	0.316049	0.445926	-0.0518506	0.886347	2.56523	0	4.27539	0	0.083348	8.74328	1.78e-11	0.20736	0	0.3456	0.3456	6.93e-52	6.93e-52	FALSE	yes	1	TRUE	no	0	FALSE
ENST00000518388.5	ENSG00000104205.12	SGK3	protein_coding	protein_coding	12.5835	12.856	12.4018	0.316049	0.445926	-0.0518506	0.886347	1.05849	0.693265	1.30197	0.693265	0.127517	0.89959	NA	0.08486	0.0553	0.104567	0.0492667	0.845641	6.93e-52	FALSE	yes	0.163819	FALSE	no	0	FALSE
ENST00000521152.5	ENSG00000104205.12	SGK3	protein_coding	protein_coding	12.5835	12.856	12.4018	0.316049	0.445926	-0.0518506	0.886347	0.384616	0.383828	0.385141	0.0371958	0.385141	0.00480211	NA	0.02938	0.0298	0.0291	-0.0007	0.855172	6.93e-52	FALSE	yes	0.196622	FALSE	no	0	FALSE
ENST00000523260.1	ENSG00000104205.12	SGK3	protein_coding	processed_transcript	12.5835	12.856	12.4018	0.316049	0.445926	-0.0518506	0.886347	0.240211	0.132536	0.311995	0.132536	0.0792369	1.17571	NA	0.01958	0.01055	0.0256	0.01505	0.878473	6.93e-52	NA	NA	0.0066087	FALSE	NA	0	FALSE
ENST00000522629.5	ENSG00000104205.12	SGK3	protein_coding	protein_coding	12.5835	12.856	12.4018	0.316049	0.445926	-0.0518506	0.886347	0.883003	1.43394	0.515714	0.781452	0.273793	-1.45766	NA	0.06974	0.1101	0.0428333	-0.0672667	0.903941	6.93e-52	FALSE	yes	0.19472	FALSE	no	0	FALSE
ENST00000523401.5	ENSG00000104205.12	SGK3	protein_coding	processed_transcript	12.5835	12.856	12.4018	0.316049	0.445926	-0.0518506	0.886347	0.200952	0.173316	0.219376	0.173316	0.125007	0.323381	NA	0.01632	0.0138	0.018	0.0042	0.960418	6.93e-52	NA	NA	0.115404	FALSE	NA	0	FALSE
ENST00000521435.1	ENSG00000104205.12	SGK3	protein_coding	processed_transcript	12.5835	12.856	12.4018	0.316049	0.445926	-0.0518506	0.886347	0.564567	0.604109	0.538206	0.288061	0.0758461	-0.163777	NA	0.04442	0.04645	0.0430667	-0.00338333	0.994727	6.93e-52	NA	NA	0.0288366	FALSE	NA	1	FALSE
ENST00000521198.6	ENSG00000104205.12	SGK3	protein_coding	protein_coding	12.5835	12.856	12.4018	0.316049	0.445926	-0.0518506	0.886347	0.715432	0.730779	0.7052	0.251611	0.0378776	-0.050697	NA	0.05684	0.0564	0.0571333	0.000733333	0.996541	6.93e-52	FALSE	yes	1	TRUE	no	0	FALSE
ENST00000306917.4	ENSG00000169018.5	FEM1B	protein_coding	protein_coding	22.3974	21.2522	23.1609	0.361372	0.339106	0.124021	0.241062	20.1389	21.2522	19.3967	0.361372	0.268712	-0.131734	0.102411	0.90266	1	0.837767	-0.162233	1.06e-46	1.06e-46	FALSE	yes	1	TRUE	no	1	TRUE
ENST00000566008.1	ENSG00000169018.5	FEM1B	protein_coding	protein_coding	22.3974	21.2522	23.1609	0.361372	0.339106	0.124021	0.241062	2.13565	0	3.55942	0	0.211346	8.47955	NA	0.09212	0	0.153533	0.153533	2.57e-37	1.06e-46	NA	no	0.999865	TRUE	no	0	TRUE
ENST00000484027.1	ENSG00000169241.17	SLC50A1	protein_coding	processed_transcript	109.73	95.911	118.943	2.18765	3.96513	0.310478	0.00248531	1.93892	4.84729	0	0.595947	0	-8.92401	NA	0.02018	0.05045	0	-0.05045	1.74e-39	1.74e-39	NA	NA	0.168287	FALSE	NA	NA	NA
ENST00000368404.8	ENSG00000169241.17	SLC50A1	protein_coding	protein_coding	109.73	95.911	118.943	2.18765	3.96513	0.310478	0.00248531	69.84	57.0269	78.3821	2.75852	2.36179	0.458812	8.75e-07	0.63316	0.5942	0.659133	0.0649333	5.25e-05	1.74e-39	FALSE	yes	0.996005	TRUE	no	NA	NA
ENST00000303343.12	ENSG00000169241.17	SLC50A1	protein_coding	protein_coding	109.73	95.911	118.943	2.18765	3.96513	0.310478	0.00248531	4.37151	5.37185	3.70462	0.469927	0.31925	-0.534887	0.304087	0.04126	0.05615	0.0313333	-0.0248167	0.0630981	1.74e-39	FALSE	yes	0.905508	TRUE	no	NA	NA
ENST00000490276.5	ENSG00000169241.17	SLC50A1	protein_coding	processed_transcript	109.73	95.911	118.943	2.18765	3.96513	0.310478	0.00248531	6.28398	4.61345	7.39767	0.443307	0.956646	0.68005	0.259805	0.05666	0.04825	0.0622667	0.0140167	0.826514	1.74e-39	NA	NA	0.395135	NA	NA	NA	NA
ENST00000488609.5	ENSG00000169241.17	SLC50A1	protein_coding	processed_transcript	109.73	95.911	118.943	2.18765	3.96513	0.310478	0.00248531	3.92568	2.42869	4.92368	1.49642	0.791885	1.01656	0.448608	0.0353	0.0257	0.0417	0.016	0.833377	1.74e-39	NA	NA	0.955093	TRUE	NA	NA	NA
ENST00000368405.7	ENSG00000169241.17	SLC50A1	protein_coding	processed_transcript	109.73	95.911	118.943	2.18765	3.96513	0.310478	0.00248531	4.16854	4.30943	4.07461	0.843104	0.422112	-0.0806428	0.954589	0.03856	0.04475	0.0344333	-0.0103167	0.837147	1.74e-39	NA	NA	0.111806	FALSE	NA	NA	NA
ENST00000479579.1	ENSG00000169241.17	SLC50A1	protein_coding	processed_transcript	109.73	95.911	118.943	2.18765	3.96513	0.310478	0.00248531	1.30493	1.47425	1.19205	0.401642	0.3568	-0.304243	NA	0.0121	0.01545	0.00986667	-0.00558333	0.874385	1.74e-39	NA	NA	0.279904	NA	NA	NA	NA
ENST00000506037.1	ENSG00000169241.17	SLC50A1	protein_coding	retained_intron	109.73	95.911	118.943	2.18765	3.96513	0.310478	0.00248531	1.14853	0.898827	1.31501	0.103611	0.175822	0.54392	NA	0.01046	0.00935	0.0112	0.00185	0.950232	1.74e-39	NA	NA	0.0947924	FALSE	NA	NA	NA
ENST00000368401.5	ENSG00000169241.17	SLC50A1	protein_coding	protein_coding	109.73	95.911	118.943	2.18765	3.96513	0.310478	0.00248531	14.798	13.3513	15.7624	0.923463	1.89994	0.239349	0.658105	0.13466	0.13905	0.131733	-0.00731667	0.959638	1.74e-39	FALSE	yes	0.530601	TRUE	no	NA	NA
ENST00000437146.1	ENSG00000078369.17	GNB1	protein_coding	protein_coding	209.322	192.873	220.287	5.77797	1.33089	0.191724	0.0051836	31.776	18.8551	40.39	0.811205	0.596324	1.09864	1.31e-06	0.14908	0.0977	0.183333	0.0856333	1.79e-39	1.79e-39	FALSE	yes	0.126298	FALSE	no	NA	NA
ENST00000378609.8	ENSG00000078369.17	GNB1	protein_coding	protein_coding	209.322	192.873	220.287	5.77797	1.33089	0.191724	0.0051836	150.395	146.597	152.927	2.52646	3.93809	0.0609833	0.622477	0.7206	0.76035	0.6941	-0.06625	0.0516455	1.79e-39	FALSE	yes	0.999994	TRUE	no	NA	NA
ENST00000610897.4	ENSG00000078369.17	GNB1	protein_coding	protein_coding	209.322	192.873	220.287	5.77797	1.33089	0.191724	0.0051836	14.2672	14.705	13.9754	0.169629	1.78209	-0.0733634	0.907391	0.06864	0.0763	0.0635333	-0.0127667	0.845276	1.79e-39	FALSE	yes	0.999995	TRUE	no	NA	NA
ENST00000434686.6	ENSG00000078369.17	GNB1	protein_coding	protein_coding	209.322	192.873	220.287	5.77797	1.33089	0.191724	0.0051836	5.90974	6.49009	5.52283	1.8087	1.38607	-0.232441	0.896917	0.0284	0.0334	0.0250667	-0.00833333	0.936454	1.79e-39	FALSE	yes	0.1663	FALSE	no	NA	NA
ENST00000439272.6	ENSG00000078369.17	GNB1	protein_coding	protein_coding	209.322	192.873	220.287	5.77797	1.33089	0.191724	0.0051836	2.40158	1.88545	2.74567	0.612348	0.540318	0.539867	NA	0.01136	0.0097	0.0124667	0.00276667	0.959638	1.79e-39	FALSE	yes	0.15841	FALSE	no	NA	NA
ENST00000472614.2	ENSG00000078369.17	GNB1	protein_coding	processed_transcript	209.322	192.873	220.287	5.77797	1.33089	0.191724	0.0051836	3.59765	3.35814	3.75732	0.230529	0.254428	0.161587	NA	0.0172	0.0174	0.0170667	-0.000333333	0.982027	1.79e-39	NA	NA	0.0178678	FALSE	NA	NA	NA
ENST00000488711.1	ENSG00000110047.17	EHD1	protein_coding	processed_transcript	44.7846	41.1976	47.176	2.19268	1.69795	0.195449	0.107055	2.22265	0	3.70442	0	0.380707	8.53699	NA	0.04692	0	0.0782	0.0782	1.25e-34	1.25e-34	NA	NA	0.958665	TRUE	NA	NA	NA
ENST00000621096.4	ENSG00000110047.17	EHD1	protein_coding	protein_coding	44.7846	41.1976	47.176	2.19268	1.69795	0.195449	0.107055	27.1614	26.346	27.7049	0.823897	1.75564	0.0725338	0.816067	0.6079	0.64025	0.586333	-0.0539167	0.555041	1.25e-34	FALSE	yes	1	TRUE	no	NA	NA
ENST00000421510.5	ENSG00000110047.17	EHD1	protein_coding	protein_coding	44.7846	41.1976	47.176	2.19268	1.69795	0.195449	0.107055	5.85303	6.09881	5.68917	0.364865	0.606179	-0.100139	0.922856	0.13168	0.148	0.1208	-0.0272	0.740537	1.25e-34	FALSE	yes	0.577674	TRUE	no	NA	NA
ENST00000498472.1	ENSG00000110047.17	EHD1	protein_coding	retained_intron	44.7846	41.1976	47.176	2.19268	1.69795	0.195449	0.107055	1.63089	1.18113	1.93072	0.192209	0.267791	0.704261	NA	0.03638	0.029	0.0413	0.0123	0.826697	1.25e-34	NA	NA	0.167215	FALSE	NA	NA	NA
ENST00000433803.1	ENSG00000110047.17	EHD1	protein_coding	protein_coding	44.7846	41.1976	47.176	2.19268	1.69795	0.195449	0.107055	1.00366	0.937947	1.04747	0.937947	0.59591	0.157744	NA	0.0224	0.0216	0.0229333	0.00133333	0.959638	1.25e-34	FALSE	yes	0.643524	TRUE	no	NA	NA
ENST00000466015.1	ENSG00000110047.17	EHD1	protein_coding	retained_intron	44.7846	41.1976	47.176	2.19268	1.69795	0.195449	0.107055	4.90538	4.72557	5.02524	0.0460336	0.528261	0.0885223	0.906418	0.10982	0.11505	0.106333	-0.00871667	0.959638	1.25e-34	NA	NA	1	TRUE	NA	NA	NA
ENST00000320631.7	ENSG00000110047.17	EHD1	protein_coding	protein_coding	44.7846	41.1976	47.176	2.19268	1.69795	0.195449	0.107055	0.999361	0.949376	1.03268	0.103185	0.245457	0.120134	0.935245	0.02258	0.02325	0.0221333	-0.00111667	0.969984	1.25e-34	FALSE	yes	1	TRUE	no	NA	NA
ENST00000484846.1	ENSG00000110047.17	EHD1	protein_coding	retained_intron	44.7846	41.1976	47.176	2.19268	1.69795	0.195449	0.107055	0.79439	0.714059	0.847943	0.162718	0.074031	0.244775	0.832521	0.01764	0.01715	0.0179667	0.000816667	0.983059	1.25e-34	NA	NA	0.999564	TRUE	NA	NA	NA
ENST00000521589.5	ENSG00000169246.16	NPIPB3	protein_coding	protein_coding	45.7131	46.4604	45.215	4.86447	1.28131	-0.0391915	0.929639	2.05034	5.12584	0	1.12937	0	-9.00446	NA	0.0436	0.109	0	-0.109	2.71e-32	2.71e-32	FALSE	yes	0.148806	FALSE	no	0	TRUE
ENST00000542817.1	ENSG00000169246.16	NPIPB3	protein_coding	protein_coding	45.7131	46.4604	45.215	4.86447	1.28131	-0.0391915	0.929639	18.6725	14.5656	21.4104	0.170199	1.2421	0.555426	0.000854665	0.41202	0.3166	0.475633	0.159033	0.0137074	2.71e-32	FALSE	yes	1	TRUE	no	0	TRUE
ENST00000535190.1	ENSG00000169246.16	NPIPB3	protein_coding	processed_transcript	45.7131	46.4604	45.215	4.86447	1.28131	-0.0391915	0.929639	4.39042	4.10139	4.5831	0.33941	0.0101866	0.159841	NA	0.0963	0.08845	0.101533	0.0130833	0.652851	2.71e-32	NA	NA	0.996149	TRUE	NA	0	TRUE
ENST00000419180.6	ENSG00000169246.16	NPIPB3	protein_coding	protein_coding	45.7131	46.4604	45.215	4.86447	1.28131	-0.0391915	0.929639	4.07405	3.28278	4.60155	0.285493	0.810167	0.485945	0.590358	0.08962	0.0721	0.1013	0.0292	0.79095	2.71e-32	FALSE	yes	0.19895	FALSE	no	0	TRUE
ENST00000504841.6	ENSG00000169246.16	NPIPB3	protein_coding	protein_coding	45.7131	46.4604	45.215	4.86447	1.28131	-0.0391915	0.929639	10.5874	12.3778	9.39382	1.27539	1.69684	-0.397603	0.551252	0.23018	0.26645	0.206	-0.06045	0.840688	2.71e-32	FALSE	yes	0.772418	TRUE	no	0	TRUE
ENST00000519305.6	ENSG00000169246.16	NPIPB3	protein_coding	processed_transcript	45.7131	46.4604	45.215	4.86447	1.28131	-0.0391915	0.929639	1.28024	2.68654	0.342711	2.68654	0.342711	-2.93455	NA	0.0255	0.05235	0.0076	-0.04475	0.959638	2.71e-32	NA	NA	0.0187256	FALSE	NA	1	TRUE
ENST00000537983.1	ENSG00000169246.16	NPIPB3	protein_coding	processed_transcript	45.7131	46.4604	45.215	4.86447	1.28131	-0.0391915	0.929639	1.13708	1.29897	1.02915	0.00419768	0.210966	-0.333037	NA	0.02504	0.02825	0.0229	-0.00535	0.959638	2.71e-32	NA	NA	0.0446942	FALSE	NA	2	TRUE
ENST00000544154.1	ENSG00000169246.16	NPIPB3	protein_coding	processed_transcript	45.7131	46.4604	45.215	4.86447	1.28131	-0.0391915	0.929639	0.760026	0.885498	0.676378	0.11362	0.230925	-0.383685	NA	0.01688	0.0195	0.0151333	-0.00436667	0.959638	2.71e-32	NA	NA	0.0159629	FALSE	NA	0	TRUE
ENST00000448012.6	ENSG00000169246.16	NPIPB3	protein_coding	protein_coding	45.7131	46.4604	45.215	4.86447	1.28131	-0.0391915	0.929639	0.593224	0.668864	0.542798	0.197718	0.162317	-0.29637	NA	0.01332	0.015	0.0122	-0.0028	0.962512	2.71e-32	FALSE	yes	0.996763	TRUE	yes	0	TRUE
ENST00000543368.1	ENSG00000169246.16	NPIPB3	protein_coding	retained_intron	45.7131	46.4604	45.215	4.86447	1.28131	-0.0391915	0.929639	1.23277	1.25506	1.21792	0.182448	0.132977	-0.0429868	NA	0.02738	0.02775	0.0271333	-0.000616667	0.992358	2.71e-32	NA	NA	0.0918974	FALSE	NA	0	TRUE
ENST00000464454.1	ENSG00000013441.15	CLK1	protein_coding	retained_intron	26.2491	25.9701	26.4351	2.38889	1.26993	0.0255912	0.914632	1.31076	3.2769	0	0.412079	0	-8.36058	NA	0.05032	0.1258	0	-0.1258	3.58e-32	3.58e-32	NA	NA	0.0162329	FALSE	NA	0	FALSE
ENST00000473565.5	ENSG00000013441.15	CLK1	protein_coding	retained_intron	26.2491	25.9701	26.4351	2.38889	1.26993	0.0255912	0.914632	2.25959	3.2763	1.58179	0.482847	0.27212	-1.04582	0.0198957	0.08576	0.12555	0.0592333	-0.0663167	0.00279983	3.58e-32	NA	NA	0.999912	TRUE	NA	2	FALSE
ENST00000528294.1	ENSG00000117298.14	ECE1	protein_coding	processed_transcript	86.9819	87.4127	86.6947	1.19289	2.36673	-0.0118976	0.987299	1.49321	3.73303	0	0.266702	0	-8.54806	NA	0.01706	0.04265	0	-0.04265	3.58e-32	3.58e-32	NA	NA	0.164623	FALSE	NA	NA	NA
ENST00000472679.1	ENSG00000013441.15	CLK1	protein_coding	retained_intron	26.2491	25.9701	26.4351	2.38889	1.26993	0.0255912	0.914632	2.34018	0	3.9003	0	1.03631	8.61113	NA	0.08662	0	0.144367	0.144367	1.5e-11	3.58e-32	NA	NA	0.0141475	FALSE	NA	0	FALSE
ENST00000415912.6	ENSG00000117298.14	ECE1	protein_coding	protein_coding	86.9819	87.4127	86.6947	1.19289	2.36673	-0.0118976	0.987299	76.7075	75.454	77.5432	1.15232	1.87848	0.0393964	0.75953	0.88204	0.8632	0.8946	0.0314	0.0909507	3.58e-32	FALSE	yes	1	TRUE	no	NA	NA
ENST00000461981.5	ENSG00000013441.15	CLK1	protein_coding	retained_intron	26.2491	25.9701	26.4351	2.38889	1.26993	0.0255912	0.914632	1.26714	0.94462	1.48215	0.0678432	0.0547324	0.644392	0.133324	0.04826	0.03645	0.0561333	0.0196833	0.405946	3.58e-32	NA	NA	0.687177	TRUE	NA	2	FALSE
ENST00000409769.6	ENSG00000013441.15	CLK1	protein_coding	protein_coding	26.2491	25.9701	26.4351	2.38889	1.26993	0.0255912	0.914632	2.25534	2.99077	1.76505	0.176932	0.646179	-0.757478	NA	0.08528	0.1155	0.0651333	-0.0503667	0.609933	3.58e-32	FALSE	yes	0.999998	TRUE	no	0	FALSE
ENST00000492793.1	ENSG00000013441.15	CLK1	protein_coding	processed_transcript	26.2491	25.9701	26.4351	2.38889	1.26993	0.0255912	0.914632	1.04415	0.68823	1.28143	0.0967911	0.270738	0.887199	NA	0.04042	0.0271	0.0493	0.0222	0.756797	3.58e-32	NA	NA	0.169952	FALSE	NA	0	FALSE
ENST00000432425.5	ENSG00000013441.15	CLK1	protein_coding	nonsense_mediated_decay	26.2491	25.9701	26.4351	2.38889	1.26993	0.0255912	0.914632	8.04275	7.22328	8.58907	0.0458149	0.300538	0.249532	0.375119	0.30818	0.2807	0.3265	0.0458	0.828665	3.58e-32	TRUE	no	0.999823	TRUE	no	0	FALSE
ENST00000481641.1	ENSG00000013441.15	CLK1	protein_coding	retained_intron	26.2491	25.9701	26.4351	2.38889	1.26993	0.0255912	0.914632	0.402452	0.0651585	0.627315	0.0651585	0.331649	3.084	NA	0.0156	0.0023	0.0244667	0.0221667	0.857509	3.58e-32	NA	NA	0.982157	TRUE	NA	0	FALSE
ENST00000321356.8	ENSG00000013441.15	CLK1	protein_coding	protein_coding	26.2491	25.9701	26.4351	2.38889	1.26993	0.0255912	0.914632	3.7847	4.37661	3.39009	1.26712	0.308112	-0.367535	0.673099	0.14374	0.16545	0.129267	-0.0361833	0.865021	3.58e-32	FALSE	yes	1	TRUE	no	0	FALSE
ENST00000436918.6	ENSG00000117298.14	ECE1	protein_coding	protein_coding	86.9819	87.4127	86.6947	1.19289	2.36673	-0.0118976	0.987299	1.34604	2.01269	0.901602	0.118081	0.50903	-1.1498	0.854416	0.01532	0.02305	0.0101667	-0.0128833	0.898846	3.58e-32	FALSE	yes	1	TRUE	no	NA	NA
ENST00000531334.1	ENSG00000117298.14	ECE1	protein_coding	retained_intron	86.9819	87.4127	86.6947	1.19289	2.36673	-0.0118976	0.987299	1.09903	0.902815	1.22983	0.22994	0.218015	0.44175	NA	0.01254	0.0103	0.0140333	0.00373333	0.904508	3.58e-32	NA	NA	0.018067	FALSE	NA	NA	NA
ENST00000470394.1	ENSG00000117298.14	ECE1	protein_coding	retained_intron	86.9819	87.4127	86.6947	1.19289	2.36673	-0.0118976	0.987299	1.53301	1.15963	1.78194	0.344026	0.517917	0.615465	NA	0.01752	0.01325	0.0203667	0.00711667	0.924811	3.58e-32	NA	NA	0.0708998	FALSE	NA	NA	NA
ENST00000526194.5	ENSG00000117298.14	ECE1	protein_coding	retained_intron	86.9819	87.4127	86.6947	1.19289	2.36673	-0.0118976	0.987299	1.7596	1.55912	1.89325	0.275996	0.281123	0.278515	0.809989	0.02022	0.0179	0.0217667	0.00386667	0.940106	3.58e-32	NA	NA	1	TRUE	NA	NA	NA
ENST00000461326.1	ENSG00000013441.15	CLK1	protein_coding	retained_intron	26.2491	25.9701	26.4351	2.38889	1.26993	0.0255912	0.914632	0.847808	0.601463	1.01204	0.601463	0.722757	0.741112	NA	0.03318	0.0212	0.0411667	0.0199667	0.959638	3.58e-32	NA	NA	0.0136489	FALSE	NA	0	FALSE
ENST00000482590.1	ENSG00000013441.15	CLK1	protein_coding	retained_intron	26.2491	25.9701	26.4351	2.38889	1.26993	0.0255912	0.914632	1.06649	0.882107	1.18942	0.310717	0.305417	0.427044	NA	0.0406	0.03535	0.0441	0.00875	0.959638	3.58e-32	NA	NA	0.0584461	FALSE	NA	1	FALSE
ENST00000264205.10	ENSG00000117298.14	ECE1	protein_coding	protein_coding	86.9819	87.4127	86.6947	1.19289	2.36673	-0.0118976	0.987299	1.90023	1.81425	1.95755	0.561202	0.450261	0.109093	0.95253	0.02206	0.02085	0.0228667	0.00201667	0.971786	3.58e-32	FALSE	yes	1	TRUE	no	NA	NA
ENST00000496205.1	ENSG00000013441.15	CLK1	protein_coding	retained_intron	26.2491	25.9701	26.4351	2.38889	1.26993	0.0255912	0.914632	1.31482	1.21997	1.37804	0.217534	0.268684	0.174428	NA	0.05008	0.04815	0.0513667	0.00321667	0.973576	3.58e-32	NA	NA	0.119136	FALSE	NA	0	FALSE
ENST00000562194.1	ENSG00000167522.14	ANKRD11	protein_coding	protein_coding	51.6991	54.7179	49.6866	3.25314	1.31498	-0.139128	0.283222	1.70848	0	2.84746	0	0.196069	8.15859	NA	0.03446	0	0.0574333	0.0574333	3.47e-31	3.47e-31	NA	no	0.0413815	FALSE	no	NA	NA
ENST00000301030.8	ENSG00000167522.14	ANKRD11	protein_coding	protein_coding	51.6991	54.7179	49.6866	3.25314	1.31498	-0.139128	0.283222	5.11502	6.16438	4.41545	0.251231	0.337609	-0.480468	0.00614111	0.09836	0.1128	0.0887333	-0.0240667	0.402859	3.47e-31	FALSE	yes	1	TRUE	no	NA	NA
ENST00000378332.6	ENSG00000167522.14	ANKRD11	protein_coding	nonsense_mediated_decay	51.6991	54.7179	49.6866	3.25314	1.31498	-0.139128	0.283222	0.946497	1.18181	0.789618	0.111331	0.153433	-0.575776	NA	0.01806	0.02155	0.0157333	-0.00581667	0.898945	3.47e-31	TRUE	no	0.99199	TRUE	no	NA	NA
ENST00000562275.5	ENSG00000167522.14	ANKRD11	protein_coding	nonsense_mediated_decay	51.6991	54.7179	49.6866	3.25314	1.31498	-0.139128	0.283222	7.0751	7.92812	6.50642	0.883318	0.119596	-0.284718	0.273274	0.13652	0.14445	0.131233	-0.0132167	0.903595	3.47e-31	TRUE	no	0.994079	TRUE	no	NA	NA
ENST00000562816.5	ENSG00000167522.14	ANKRD11	protein_coding	processed_transcript	51.6991	54.7179	49.6866	3.25314	1.31498	-0.139128	0.283222	5.50413	6.7168	4.69569	1.27263	0.997144	-0.515515	NA	0.1049	0.1218	0.0936333	-0.0281667	0.91145	3.47e-31	NA	NA	0.0933664	FALSE	NA	NA	NA
ENST00000568512.5	ENSG00000167522.14	ANKRD11	protein_coding	processed_transcript	51.6991	54.7179	49.6866	3.25314	1.31498	-0.139128	0.283222	1.45758	1.19606	1.63193	0.818842	0.63953	0.445095	NA	0.02846	0.02105	0.0334	0.01235	0.942127	3.47e-31	NA	NA	0.010286	FALSE	NA	NA	NA
ENST00000567736.5	ENSG00000167522.14	ANKRD11	protein_coding	processed_transcript	51.6991	54.7179	49.6866	3.25314	1.31498	-0.139128	0.283222	7.55862	8.22821	7.11222	0.0619551	0.18415	-0.210004	0.329871	0.14628	0.15085	0.143233	-0.00761667	0.959638	3.47e-31	NA	NA	0.999171	TRUE	NA	NA	NA
ENST00000623388.1	ENSG00000167522.14	ANKRD11	protein_coding	TEC	51.6991	54.7179	49.6866	3.25314	1.31498	-0.139128	0.283222	0.570706	0.632669	0.529398	0.101377	0.0827227	-0.252726	NA	0.01112	0.01175	0.0107	-0.00105	0.960403	3.47e-31	NA	NA	0.997869	TRUE	NA	NA	NA
ENST00000378330.6	ENSG00000167522.14	ANKRD11	protein_coding	protein_coding	51.6991	54.7179	49.6866	3.25314	1.31498	-0.139128	0.283222	20.2009	21.3606	19.4278	0.0286894	0.354929	-0.136762	0.0660734	0.3915	0.3918	0.3913	-0.0005	0.978213	3.47e-31	FALSE	yes	1	TRUE	no	NA	NA
ENST00000557397.5	ENSG00000100575.13	TIMM9	protein_coding	processed_transcript	76.0303	81.5828	72.3286	0.365228	4.43645	-0.173677	0.397217	1.29089	3.22722	0	0.290078	0	-8.33861	NA	0.01582	0.03955	0	-0.03955	3.44e-24	3.44e-24	NA	NA	0.0236868	FALSE	NA	NA	NA
ENST00000556007.6	ENSG00000100575.13	TIMM9	protein_coding	protein_coding	76.0303	81.5828	72.3286	0.365228	4.43645	-0.173677	0.397217	2.83856	4.35213	1.82952	0.623063	0.222754	-1.24571	NA	0.03662	0.0533	0.0255	-0.0278	0.0268458	3.44e-24	FALSE	yes	0.176014	FALSE	no	NA	NA
ENST00000555404.5	ENSG00000100575.13	TIMM9	protein_coding	protein_coding	76.0303	81.5828	72.3286	0.365228	4.43645	-0.173677	0.397217	14.0344	14.0081	14.052	0.846104	2.36626	0.0045051	0.998905	0.18376	0.1717	0.1918	0.0201	0.959638	3.44e-24	FALSE	yes	0.338177	NA	no	NA	NA
ENST00000555593.5	ENSG00000100575.13	TIMM9	protein_coding	protein_coding	76.0303	81.5828	72.3286	0.365228	4.43645	-0.173677	0.397217	19.1942	20.2368	18.4991	0.172869	0.645506	-0.12946	0.742947	0.25358	0.24805	0.257267	0.00921667	0.959638	3.44e-24	FALSE	yes	0.269143	NA	no	NA	NA
ENST00000555930.6	ENSG00000100575.13	TIMM9	protein_coding	protein_coding	76.0303	81.5828	72.3286	0.365228	4.43645	-0.173677	0.397217	1.59905	0.957329	2.02686	0.957329	1.49456	1.07427	NA	0.02218	0.0118	0.0291	0.0173	0.959638	3.44e-24	FALSE	yes	0.0963461	FALSE	no	NA	NA
ENST00000556367.6	ENSG00000100575.13	TIMM9	protein_coding	protein_coding	76.0303	81.5828	72.3286	0.365228	4.43645	-0.173677	0.397217	10.6258	10.7948	10.5132	1.38479	1.83426	-0.0381084	0.989227	0.13924	0.1324	0.1438	0.0114	0.959638	3.44e-24	FALSE	yes	0.0909917	FALSE	no	NA	NA
ENST00000216463.8	ENSG00000100575.13	TIMM9	protein_coding	processed_transcript	76.0303	81.5828	72.3286	0.365228	4.43645	-0.173677	0.397217	2.58482	2.4431	2.6793	0.809127	0.916378	0.132623	NA	0.03396	0.0299	0.0366667	0.00676667	0.966841	3.44e-24	NA	NA	0.0461254	FALSE	NA	NA	NA
ENST00000395159.6	ENSG00000100575.13	TIMM9	protein_coding	protein_coding	76.0303	81.5828	72.3286	0.365228	4.43645	-0.173677	0.397217	23.0477	24.9734	21.7638	0.493876	1.20469	-0.198376	0.399936	0.30376	0.3061	0.3022	-0.0039	0.988062	3.44e-24	FALSE	yes	0.158375	FALSE	no	NA	NA
ENST00000379638.8	ENSG00000129625.12	REEP5	protein_coding	protein_coding	154.349	122.889	175.322	1.64396	9.03333	0.512616	3.09e-10	94.0157	94.7042	93.5567	2.75053	0.712943	-0.0175862	0.926098	0.63004	0.7705	0.5364	-0.2341	2.3e-10	5.34e-24	FALSE	yes	0.93622	TRUE	no	0	NA
ENST00000504247.1	ENSG00000129625.12	REEP5	protein_coding	protein_coding	154.349	122.889	175.322	1.64396	9.03333	0.512616	3.09e-10	21.5072	13.1892	27.0526	0.965268	2.59054	1.03585	0.00191376	0.13518	0.10745	0.153667	0.0462167	0.0176833	5.34e-24	FALSE	no	0.267628	NA	no	0	NA
ENST00000474542.2	ENSG00000129625.12	REEP5	protein_coding	processed_transcript	154.349	122.889	175.322	1.64396	9.03333	0.512616	3.09e-10	16.3843	5.5068	23.6359	1.48702	3.80698	2.09969	1.69e-06	0.098	0.0447	0.133533	0.0888333	0.000620325	5.34e-24	NA	NA	0.132679	FALSE	NA	0	NA
ENST00000511865.6	ENSG00000129625.12	REEP5	protein_coding	nonsense_mediated_decay	154.349	122.889	175.322	1.64396	9.03333	0.512616	3.09e-10	18.7381	7.21536	26.4199	0.292904	2.34178	1.87103	1.4e-20	0.11356	0.05875	0.1501	0.09135	5.34e-24	5.34e-24	NA	no	0.848564	TRUE	no	0	NA
ENST00000513339.5	ENSG00000129625.12	REEP5	protein_coding	protein_coding	154.349	122.889	175.322	1.64396	9.03333	0.512616	3.09e-10	3.18101	2.27336	3.78611	1.33542	0.617182	0.733361	0.588306	0.02042	0.01865	0.0216	0.00295	0.959638	5.34e-24	FALSE	yes	0.338922	NA	no	0	NA
ENST00000466455.1	ENSG00000136068.14	FLNB	protein_coding	protein_coding	85.026	91.3862	80.7858	1.1088	2.13941	-0.177853	0.0399897	1.05287	2.63218	0	0.144578	0	-8.04558	NA	0.01152	0.0288	0	-0.0288	2.89e-22	2.89e-22	NA	no	0.0862038	FALSE	no	NA	NA
ENST00000295956.8	ENSG00000136068.14	FLNB	protein_coding	protein_coding	85.026	91.3862	80.7858	1.1088	2.13941	-0.177853	0.0399897	54.0027	56.1697	52.558	2.51303	1.48139	-0.0958657	0.480805	0.6361	0.6144	0.650567	0.0361667	0.63083	2.89e-22	FALSE	yes	1	TRUE	no	NA	NA
ENST00000419752.3	ENSG00000136068.14	FLNB	protein_coding	protein_coding	85.026	91.3862	80.7858	1.1088	2.13941	-0.177853	0.0399897	18.2811	18.7248	17.9853	0.251341	0.822416	-0.0581003	0.849542	0.21576	0.2049	0.223	0.0181	0.898655	2.89e-22	FALSE	yes	0.97266	TRUE	no	NA	NA
ENST00000468939.1	ENSG00000136068.14	FLNB	protein_coding	retained_intron	85.026	91.3862	80.7858	1.1088	2.13941	-0.177853	0.0399897	1.67125	2.12093	1.37147	0.366666	0.417978	-0.625286	NA	0.01938	0.0233	0.0167667	-0.00653333	0.930511	2.89e-22	NA	NA	0.059082	FALSE	NA	NA	NA
ENST00000429972.6	ENSG00000136068.14	FLNB	protein_coding	protein_coding	85.026	91.3862	80.7858	1.1088	2.13941	-0.177853	0.0399897	6.24479	7.62078	5.32746	2.22766	0.266546	-0.515678	0.197535	0.07306	0.0837	0.0659667	-0.0177333	0.935667	2.89e-22	FALSE	yes	1	TRUE	no	NA	NA
ENST00000475487.1	ENSG00000136068.14	FLNB	protein_coding	retained_intron	85.026	91.3862	80.7858	1.1088	2.13941	-0.177853	0.0399897	1.20016	1.2824	1.14533	0.171136	0.265953	-0.161743	NA	0.01416	0.014	0.0142667	0.000266667	0.997758	2.89e-22	NA	NA	0.78399	TRUE	NA	NA	NA
ENST00000521085.1	ENSG00000083307.10	GRHL2	protein_coding	protein_coding	62.3527	65.925	59.9712	1.30858	0.931678	-0.136533	0.192123	1.09297	2.73242	0	0.244822	0	-8.09931	NA	0.01656	0.0414	0	-0.0414	6.07e-22	6.07e-22	FALSE	no	0.0156069	FALSE	no	NA	NA
ENST00000251808.7	ENSG00000083307.10	GRHL2	protein_coding	protein_coding	62.3527	65.925	59.9712	1.30858	0.931678	-0.136533	0.192123	52.2034	54.0573	50.9675	0.0743749	0.0981826	-0.0848963	0.139681	0.83824	0.82025	0.850233	0.0299833	0.46924	6.07e-22	FALSE	yes	1	TRUE	no	NA	NA
ENST00000474338.1	ENSG00000083307.10	GRHL2	protein_coding	retained_intron	62.3527	65.925	59.9712	1.30858	0.931678	-0.136533	0.192123	2.83073	2.68255	2.92952	0.164371	0.230128	0.126604	NA	0.04552	0.04065	0.0487667	0.00811667	0.756797	6.07e-22	NA	NA	0.0319304	FALSE	NA	NA	NA
ENST00000395927.1	ENSG00000083307.10	GRHL2	protein_coding	protein_coding	62.3527	65.925	59.9712	1.30858	0.931678	-0.136533	0.192123	5.71624	6.13997	5.43374	0.746779	0.543957	-0.175982	0.784042	0.09144	0.09295	0.0904333	-0.00251667	0.978047	6.07e-22	FALSE	yes	1	TRUE	no	NA	NA
ENST00000357540.8	ENSG00000155256.17	ZFYVE27	protein_coding	protein_coding	19.0054	17.9841	19.6862	1.17246	0.631757	0.130391	0.503735	1.4126	0	2.35433	0	0.144549	7.88529	2.42e-08	0.07216	0	0.120267	0.120267	1.96e-21	1.96e-21	FALSE	yes	0.999995	TRUE	no	0	TRUE
ENST00000370610.7	ENSG00000155256.17	ZFYVE27	protein_coding	protein_coding	19.0054	17.9841	19.6862	1.17246	0.631757	0.130391	0.503735	2.96557	2.25549	3.43895	0.140349	0.362621	0.606332	0.120786	0.15496	0.12645	0.173967	0.0475167	0.535866	1.96e-21	FALSE	yes	0.999994	TRUE	no	0	TRUE
ENST00000477521.5	ENSG00000155256.17	ZFYVE27	protein_coding	processed_transcript	19.0054	17.9841	19.6862	1.17246	0.631757	0.130391	0.503735	0.542568	0.293268	0.708769	0.0125848	0.222512	1.24494	NA	0.02782	0.01645	0.0354	0.01895	0.636339	1.96e-21	NA	NA	0.0777135	FALSE	NA	0	TRUE
ENST00000359980.5	ENSG00000155256.17	ZFYVE27	protein_coding	protein_coding	19.0054	17.9841	19.6862	1.17246	0.631757	0.130391	0.503735	9.10479	9.30731	8.96978	0.366225	0.255016	-0.0532336	0.890614	0.48172	0.5184	0.457267	-0.0611333	0.639854	1.96e-21	FALSE	yes	1	TRUE	no	0	TRUE
ENST00000423811.3	ENSG00000155256.17	ZFYVE27	protein_coding	protein_coding	19.0054	17.9841	19.6862	1.17246	0.631757	0.130391	0.503735	0.420441	0.624926	0.284118	0.217123	0.178767	-1.11019	NA	0.02262	0.03415	0.0149333	-0.0192167	0.884676	1.96e-21	FALSE	yes	1	TRUE	no	0	TRUE
ENST00000370613.7	ENSG00000155256.17	ZFYVE27	protein_coding	protein_coding	19.0054	17.9841	19.6862	1.17246	0.631757	0.130391	0.503735	2.16908	3.18973	1.48864	0.559395	0.745082	-1.09429	0.87197	0.11526	0.1761	0.0747	-0.1014	0.899075	1.96e-21	FALSE	yes	0.999966	TRUE	no	0	TRUE
ENST00000481956.1	ENSG00000155256.17	ZFYVE27	protein_coding	retained_intron	19.0054	17.9841	19.6862	1.17246	0.631757	0.130391	0.503735	0.549356	0.601401	0.514659	0.0100865	0.1694	-0.220739	NA	0.02886	0.03355	0.0257333	-0.00781667	0.946213	1.96e-21	NA	NA	0.0179888	FALSE	NA	0	TRUE
ENST00000337540.11	ENSG00000155256.17	ZFYVE27	protein_coding	protein_coding	19.0054	17.9841	19.6862	1.17246	0.631757	0.130391	0.503735	0.461355	0.387413	0.51065	0.387413	0.396026	0.389674	NA	0.02524	0.02305	0.0267	0.00365	0.975224	1.96e-21	FALSE	yes	1	TRUE	no	0	TRUE
ENST00000473237.1	ENSG00000155256.17	ZFYVE27	protein_coding	processed_transcript	19.0054	17.9841	19.6862	1.17246	0.631757	0.130391	0.503735	0.885181	0.905609	0.871562	0.497805	0.350321	-0.0546687	NA	0.04546	0.0488	0.0432333	-0.00556667	0.984383	1.96e-21	NA	NA	0.0134442	FALSE	NA	0	TRUE
ENST00000462887.1	ENSG00000155256.17	ZFYVE27	protein_coding	processed_transcript	19.0054	17.9841	19.6862	1.17246	0.631757	0.130391	0.503735	0.494449	0.418999	0.544749	0.0621714	0.25502	0.37086	NA	0.02596	0.02315	0.0278333	0.00468333	0.990171	1.96e-21	NA	NA	0.216565	FALSE	NA	0	TRUE
ENST00000558556.5	ENSG00000259479.6	SORD2P	transcribed_unprocessed_pseudogene	transcribed_unprocessed_pseudogene	9.41444	7.87776	10.4389	0.262039	1.21428	0.405663	0.241087	1.70249	0	2.83749	0	0.315722	8.15354	NA	0.16454	0	0.274233	0.274233	1.6e-20	1.6e-20	NA	NA	0.999825	TRUE	NA	0	FALSE
ENST00000561384.3	ENSG00000259479.6	SORD2P	transcribed_unprocessed_pseudogene	processed_transcript	9.41444	7.87776	10.4389	0.262039	1.21428	0.405663	0.241087	1.34735	2.52957	0.559199	0.27408	0.288616	-2.15758	0.623531	0.1653	0.3226	0.0604333	-0.262167	0.5769	1.6e-20	NA	NA	0.992555	TRUE	NA	0	FALSE
ENST00000562107.1	ENSG00000259479.6	SORD2P	transcribed_unprocessed_pseudogene	retained_intron	9.41444	7.87776	10.4389	0.262039	1.21428	0.405663	0.241087	6.36461	5.3482	7.04221	0.536119	1.27177	0.396329	0.602511	0.67016	0.6774	0.665333	-0.0120667	0.980342	1.6e-20	NA	NA	0.0631351	FALSE	NA	0	FALSE
ENST00000613627.4	ENSG00000172270.18	BSG	protein_coding	protein_coding	335.656	327.865	340.85	9.57118	6.74041	0.0560333	0.580313	7.97554	0	13.2926	0	4.10836	10.3775	7.83e-08	0.0233	0	0.0388333	0.0388333	6.59e-20	6.59e-20	FALSE	yes	0.283109	NA	yes	NA	NA
ENST00000353555.8	ENSG00000172270.18	BSG	protein_coding	protein_coding	335.656	327.865	340.85	9.57118	6.74041	0.0560333	0.580313	289.517	285.885	291.938	11.6884	5.91661	0.0302239	0.867648	0.86258	0.8717	0.8565	-0.0152	0.338997	6.59e-20	FALSE	yes	0.999986	TRUE	yes	NA	NA
ENST00000618112.2	ENSG00000172270.18	BSG	protein_coding	retained_intron	335.656	327.865	340.85	9.57118	6.74041	0.0560333	0.580313	27.3267	30.2855	25.3542	0.729961	2.54919	-0.256311	0.53647	0.0817	0.0925	0.0745	-0.018	0.680413	6.59e-20	NA	NA	0.0190917	FALSE	NA	NA	NA
ENST00000572899.5	ENSG00000172270.18	BSG	protein_coding	retained_intron	335.656	327.865	340.85	9.57118	6.74041	0.0560333	0.580313	5.47962	5.76713	5.28794	0.00691382	0.47972	-0.124922	NA	0.01634	0.0176	0.0155	-0.0021	0.836306	6.59e-20	NA	NA	0.133203	FALSE	NA	NA	NA
ENST00000568413.1	ENSG00000103932.11	RPAP1	protein_coding	processed_transcript	14.3291	13.5637	14.8394	1.49438	0.367855	0.129586	0.57825	1.06598	0	1.77663	0	0.165179	7.4811	NA	0.0716	0	0.119333	0.119333	1.62e-19	1.62e-19	NA	NA	0.101499	FALSE	NA	0	NA
ENST00000563293.1	ENSG00000103932.11	RPAP1	protein_coding	retained_intron	14.3291	13.5637	14.8394	1.49438	0.367855	0.129586	0.57825	0.211336	0	0.352227	0	0.192982	5.17882	NA	0.01452	0	0.0242	0.0242	0.660239	1.62e-19	NA	NA	0.0139682	FALSE	NA	0	NA
ENST00000561603.5	ENSG00000103932.11	RPAP1	protein_coding	protein_coding	14.3291	13.5637	14.8394	1.49438	0.367855	0.129586	0.57825	1.12424	1.6527	0.771933	0.612807	0.597786	-1.08841	0.884768	0.08192	0.1284	0.0509333	-0.0774667	0.862647	1.62e-19	FALSE	yes	1	TRUE	no	0	NA
ENST00000565167.1	ENSG00000103932.11	RPAP1	protein_coding	retained_intron	14.3291	13.5637	14.8394	1.49438	0.367855	0.129586	0.57825	4.12826	4.14482	4.11723	0.0147723	0.188875	-0.00961339	0.996257	0.29008	0.3092	0.277333	-0.0318667	0.915662	1.62e-19	NA	NA	0.999792	TRUE	NA	1	NA
ENST00000566863.1	ENSG00000103932.11	RPAP1	protein_coding	protein_coding	14.3291	13.5637	14.8394	1.49438	0.367855	0.129586	0.57825	1.30623	1.6814	1.05612	0.989714	0.348163	-0.665849	NA	0.08932	0.11735	0.0706333	-0.0467167	0.92861	1.62e-19	FALSE	no	0.0721789	FALSE	no	0	NA
ENST00000567866.5	ENSG00000103932.11	RPAP1	protein_coding	protein_coding	14.3291	13.5637	14.8394	1.49438	0.367855	0.129586	0.57825	0.215597	0.117243	0.281166	0.117243	0.162216	1.19425	NA	0.01482	0.0078	0.0195	0.0117	0.956018	1.62e-19	FALSE	no	0.148972	FALSE	no	0	NA
ENST00000304330.8	ENSG00000103932.11	RPAP1	protein_coding	protein_coding	14.3291	13.5637	14.8394	1.49438	0.367855	0.129586	0.57825	5.17665	4.64235	5.53285	0.873184	0.431922	0.252667	0.602929	0.36012	0.3393	0.374	0.0347	0.959638	1.62e-19	FALSE	yes	1	TRUE	no	0	NA
ENST00000562303.5	ENSG00000103932.11	RPAP1	protein_coding	nonsense_mediated_decay	14.3291	13.5637	14.8394	1.49438	0.367855	0.129586	0.57825	0.335793	0.383231	0.304168	0.107964	0.0698366	-0.323842	NA	0.02396	0.0295	0.0202667	-0.00923333	0.959638	1.62e-19	TRUE	yes	1	TRUE	no	1	NA
ENST00000564934.1	ENSG00000103932.11	RPAP1	protein_coding	retained_intron	14.3291	13.5637	14.8394	1.49438	0.367855	0.129586	0.57825	0.242083	0.282048	0.21544	0.118927	0.0234406	-0.373467	NA	0.0175	0.022	0.0145	-0.0075	0.959638	1.62e-19	NA	NA	0.922521	TRUE	NA	0	NA
ENST00000569829.1	ENSG00000103932.11	RPAP1	protein_coding	retained_intron	14.3291	13.5637	14.8394	1.49438	0.367855	0.129586	0.57825	0.302517	0.361925	0.262912	0.361925	0.160457	-0.446579	NA	0.02006	0.02405	0.0174	-0.00665	0.987711	1.62e-19	NA	NA	0.0684722	FALSE	NA	0	NA
ENST00000478737.5	ENSG00000116521.10	SCAMP3	protein_coding	processed_transcript	73.6882	70.4678	75.8352	2.14156	3.01475	0.10589	0.483997	2.01413	0	3.35688	0	0.418461	8.39527	NA	0.02684	0	0.0447333	0.0447333	3e-19	3e-19	NA	NA	0.227657	FALSE	NA	NA	NA
ENST00000490999.5	ENSG00000116521.10	SCAMP3	protein_coding	processed_transcript	73.6882	70.4678	75.8352	2.14156	3.01475	0.10589	0.483997	1.53013	2.11937	1.1373	0.416796	0.146771	-0.892192	NA	0.02116	0.03025	0.0151	-0.01515	0.329158	3e-19	NA	NA	0.997456	TRUE	NA	NA	NA
ENST00000302631.7	ENSG00000116521.10	SCAMP3	protein_coding	protein_coding	73.6882	70.4678	75.8352	2.14156	3.01475	0.10589	0.483997	51.2115	50.8452	51.4557	0.823483	1.3971	0.0172181	0.937198	0.69636	0.72185	0.679367	-0.0424833	0.605656	3e-19	FALSE	yes	1	TRUE	no	NA	NA
ENST00000480219.1	ENSG00000116521.10	SCAMP3	protein_coding	processed_transcript	73.6882	70.4678	75.8352	2.14156	3.01475	0.10589	0.483997	1.88014	1.94898	1.83425	0.355105	0.520312	-0.087073	NA	0.02526	0.0275	0.0237667	-0.00373333	0.959638	3e-19	NA	NA	0.0398143	FALSE	NA	NA	NA
ENST00000355379.3	ENSG00000116521.10	SCAMP3	protein_coding	protein_coding	73.6882	70.4678	75.8352	2.14156	3.01475	0.10589	0.483997	14.5427	13.4422	15.2763	1.46303	2.24106	0.184401	0.794735	0.1965	0.1903	0.200633	0.0103333	0.963325	3e-19	FALSE	yes	0.999995	TRUE	no	NA	NA
ENST00000497470.1	ENSG00000116521.10	SCAMP3	protein_coding	processed_transcript	73.6882	70.4678	75.8352	2.14156	3.01475	0.10589	0.483997	1.09767	1.07758	1.11105	0.115241	0.3117	0.0437318	NA	0.01496	0.01525	0.0147667	-0.000483333	0.975079	3e-19	NA	NA	0.12329	FALSE	NA	NA	NA
ENST00000462151.5	ENSG00000116521.10	SCAMP3	protein_coding	processed_transcript	73.6882	70.4678	75.8352	2.14156	3.01475	0.10589	0.483997	1.0709	1.0345	1.09516	0.198502	0.198376	0.0814492	NA	0.01448	0.01475	0.0143	-0.00045	0.99487	3e-19	NA	NA	0.111122	FALSE	NA	NA	NA
ENST00000541150.5	ENSG00000166037.10	CEP57	protein_coding	protein_coding	15.3064	15.9267	14.8928	0.00201927	1.07474	-0.0967728	0.763836	1.25275	3.11228	0.0130556	0.445798	0.0130556	-7.08134	7.87e-11	0.07862	0.1954	0.000766667	-0.194633	4.79e-19	4.79e-19	FALSE	yes	1	TRUE	no	0	TRUE
ENST00000540830.5	ENSG00000166037.10	CEP57	protein_coding	nonsense_mediated_decay	15.3064	15.9267	14.8928	0.00201927	1.07474	-0.0967728	0.763836	1.42405	0.41162	2.09901	0.261255	0.615124	2.32255	0.0343811	0.09256	0.02585	0.137033	0.111183	0.117721	4.79e-19	TRUE	no	1	TRUE	no	0	TRUE
ENST00000537093.5	ENSG00000166037.10	CEP57	protein_coding	protein_coding	15.3064	15.9267	14.8928	0.00201927	1.07474	-0.0967728	0.763836	1.34525	1.17264	1.46032	0.000209633	0.161008	0.314113	NA	0.08804	0.0736	0.0976667	0.0240667	0.670121	4.79e-19	FALSE	yes	0.0790122	FALSE	no	0	TRUE
ENST00000538658.5	ENSG00000166037.10	CEP57	protein_coding	protein_coding	15.3064	15.9267	14.8928	0.00201927	1.07474	-0.0967728	0.763836	1.33857	1.70564	1.09386	0.329307	0.0951074	-0.636195	0.369249	0.08722	0.1071	0.0739667	-0.0331333	0.68464	4.79e-19	FALSE	yes	0.999938	TRUE	no	1	TRUE
ENST00000325542.9	ENSG00000166037.10	CEP57	protein_coding	protein_coding	15.3064	15.9267	14.8928	0.00201927	1.07474	-0.0967728	0.763836	8.85897	8.60777	9.02643	0.604637	0.45706	0.0684376	0.855749	0.58168	0.5405	0.609133	0.0686333	0.689591	4.79e-19	FALSE	yes	1	TRUE	no	0	TRUE
ENST00000539855.5	ENSG00000166037.10	CEP57	protein_coding	nonsense_mediated_decay	15.3064	15.9267	14.8928	0.00201927	1.07474	-0.0967728	0.763836	0.262252	0.147829	0.338534	0.147829	0.180057	1.14294	NA	0.01694	0.0093	0.0220333	0.0127333	0.959638	4.79e-19	TRUE	no	1	TRUE	no	0	TRUE
ENST00000538158.1	ENSG00000166037.10	CEP57	protein_coding	retained_intron	15.3064	15.9267	14.8928	0.00201927	1.07474	-0.0967728	0.763836	0.608009	0.661889	0.572089	0.0297939	0.0489947	-0.206983	NA	0.03964	0.04155	0.0383667	-0.00318333	0.961892	4.79e-19	NA	NA	0.173697	FALSE	NA	0	TRUE
ENST00000535497.1	ENSG00000166037.10	CEP57	protein_coding	nonsense_mediated_decay	15.3064	15.9267	14.8928	0.00201927	1.07474	-0.0967728	0.763836	0.146045	0.107048	0.172043	0.107048	0.172043	0.637173	NA	0.01046	0.0067	0.0129667	0.00626667	0.963127	4.79e-19	TRUE	no	0.025526	FALSE	no	0	TRUE
ENST00000405600.5	ENSG00000138028.15	CGREF1	protein_coding	protein_coding	15.9824	17.1618	15.1962	0.210588	0.508835	-0.175386	0.541066	0.82893	2.07232	0	0.0027236	0	-7.70205	NA	0.0483	0.12075	0	-0.12075	5.36e-19	5.36e-19	FALSE	no	1	TRUE	yes	1	NA
ENST00000391757.1	ENSG00000105619.13	TFPT	protein_coding	protein_coding	48.3498	39.6981	54.1176	3.59023	3.26468	0.446932	0.00899552	1.70612	0	2.84353	0	0.47877	8.1566	NA	0.03112	0	0.0518667	0.0518667	5.36e-19	5.36e-19	FALSE	no	0.985878	TRUE	no	NA	NA
ENST00000440612.5	ENSG00000138028.15	CGREF1	protein_coding	nonsense_mediated_decay	15.9824	17.1618	15.1962	0.210588	0.508835	-0.175386	0.541066	0.563918	0.379328	0.686977	0.0284748	0.134566	0.840125	NA	0.03566	0.0221	0.0447	0.0226	0.483429	5.36e-19	TRUE	no	0.654461	TRUE	yes	0	NA
ENST00000467539.1	ENSG00000138028.15	CGREF1	protein_coding	retained_intron	15.9824	17.1618	15.1962	0.210588	0.508835	-0.175386	0.541066	0.507036	0.347719	0.613247	0.123427	0.0875088	0.800977	NA	0.03218	0.02035	0.0400667	0.0197167	0.505789	5.36e-19	NA	NA	0.114209	FALSE	NA	2	NA
ENST00000391759.5	ENSG00000105619.13	TFPT	protein_coding	protein_coding	48.3498	39.6981	54.1176	3.59023	3.26468	0.446932	0.00899552	16.2292	16.2632	16.2066	0.334418	1.41184	-0.00502231	0.998443	0.34708	0.41225	0.303633	-0.108617	0.527531	5.36e-19	FALSE	no	0.999966	TRUE	no	NA	NA
ENST00000402394.5	ENSG00000138028.15	CGREF1	protein_coding	protein_coding	15.9824	17.1618	15.1962	0.210588	0.508835	-0.175386	0.541066	3.2982	3.20037	3.36342	0.102835	0.164073	0.0714717	0.907222	0.20756	0.1864	0.221667	0.0352667	0.67569	5.36e-19	FALSE	no	1	TRUE	yes	1	NA
ENST00000391758.5	ENSG00000105619.13	TFPT	protein_coding	protein_coding	48.3498	39.6981	54.1176	3.59023	3.26468	0.446932	0.00899552	26.568	19.7139	31.1375	3.75512	3.12006	0.659166	0.0727299	0.54088	0.4921	0.5734	0.0813	0.727053	5.36e-19	FALSE	no	0.999956	TRUE	no	NA	NA
ENST00000260595.9	ENSG00000138028.15	CGREF1	protein_coding	protein_coding	15.9824	17.1618	15.1962	0.210588	0.508835	-0.175386	0.541066	0.947169	0.657582	1.14023	0.657582	0.416354	0.784901	NA	0.05958	0.03785	0.0740667	0.0362167	0.880547	5.36e-19	FALSE	no	1	TRUE	yes	0	NA
ENST00000420715.6	ENSG00000105619.13	TFPT	protein_coding	nonsense_mediated_decay	48.3498	39.6981	54.1176	3.59023	3.26468	0.446932	0.00899552	3.84639	3.72096	3.93001	0.499311	0.975138	0.0786533	NA	0.08092	0.09565	0.0711	-0.02455	0.900123	5.36e-19	TRUE	no	0.771401	TRUE	no	NA	NA
ENST00000402550.5	ENSG00000138028.15	CGREF1	protein_coding	protein_coding	15.9824	17.1618	15.1962	0.210588	0.508835	-0.175386	0.541066	1.80543	1.70479	1.87252	0.430405	0.132791	0.134633	0.922456	0.11392	0.0997	0.1234	0.0237	0.916572	5.36e-19	FALSE	no	0.96093	TRUE	yes	0	NA
ENST00000312734.8	ENSG00000138028.15	CGREF1	protein_coding	protein_coding	15.9824	17.1618	15.1962	0.210588	0.508835	-0.175386	0.541066	7.78145	8.51291	7.29381	0.132519	0.452588	-0.222695	0.554752	0.4874	0.49605	0.481633	-0.0144167	0.962683	5.36e-19	FALSE	no	1	TRUE	yes	1	NA
ENST00000404694.3	ENSG00000138028.15	CGREF1	protein_coding	protein_coding	15.9824	17.1618	15.1962	0.210588	0.508835	-0.175386	0.541066	0.250307	0.286804	0.225975	0.154268	0.134863	-0.330877	NA	0.0154	0.0168	0.0144667	-0.00233333	0.962683	5.36e-19	FALSE	no	1	TRUE	yes	1	NA
ENST00000546079.5	ENSG00000104853.15	CLPTM1	protein_coding	protein_coding	107.598	98.7593	113.491	4.10904	4.18418	0.200568	0.0387431	63.8763	67.0854	61.7368	3.83154	1.66156	-0.119849	0.469177	0.59824	0.67885	0.5445	-0.13435	1.98e-08	1.03e-18	FALSE	yes	1	TRUE	no	0	TRUE
ENST00000337392.9	ENSG00000104853.15	CLPTM1	protein_coding	protein_coding	107.598	98.7593	113.491	4.10904	4.18418	0.200568	0.0387431	34.4875	23.8193	41.5997	0.309424	1.83719	0.804184	1.39e-17	0.3165	0.2417	0.366367	0.124667	1.03e-18	1.03e-18	FALSE	yes	1	TRUE	no	0	TRUE
ENST00000586975.1	ENSG00000104853.15	CLPTM1	protein_coding	retained_intron	107.598	98.7593	113.491	4.10904	4.18418	0.200568	0.0387431	1.13347	1.29362	1.02671	0.0396244	0.181193	-0.330507	NA	0.01072	0.01315	0.0091	-0.00405	0.732235	1.03e-18	NA	NA	0.0379587	FALSE	NA	0	TRUE
ENST00000587537.5	ENSG00000104853.15	CLPTM1	protein_coding	retained_intron	107.598	98.7593	113.491	4.10904	4.18418	0.200568	0.0387431	1.6428	1.44979	1.77147	0.497472	0.0782884	0.287311	NA	0.01516	0.0145	0.0156	0.0011	0.960384	1.03e-18	NA	NA	0.196777	FALSE	NA	0	TRUE
ENST00000586915.1	ENSG00000104853.15	CLPTM1	protein_coding	protein_coding	107.598	98.7593	113.491	4.10904	4.18418	0.200568	0.0387431	3.99096	3.14003	4.55825	0.458725	1.48784	0.536276	NA	0.0365	0.03205	0.0394667	0.00741667	0.960714	1.03e-18	FALSE	no	0.912256	TRUE	no	0	TRUE
ENST00000585296.1	ENSG00000141027.20	NCOR1	protein_coding	retained_intron	53.3449	49.0148	56.2317	0.145891	1.37317	0.19813	0.0206024	1.11403	0.384767	1.60021	0.0740113	0.156209	2.02817	NA	0.0202	0.00785	0.0284333	0.0205833	0.000205657	1.45e-18	NA	NA	0.997895	TRUE	NA	NA	NA
ENST00000579573.2	ENSG00000141027.20	NCOR1	protein_coding	protein_coding	53.3449	49.0148	56.2317	0.145891	1.37317	0.19813	0.0206024	1.32137	0	2.20228	0	0.24335	7.78939	NA	0.02346	0	0.0391	0.0391	1.45e-18	1.45e-18	FALSE	no	0.159153	FALSE	no	NA	NA
ENST00000566671.1	ENSG00000169221.13	TBC1D10B	protein_coding	retained_intron	39.5052	37.321	40.9613	1.62418	0.592878	0.13424	0.260398	0.993552	0	1.65592	0	0.0912765	7.38018	NA	0.02424	0	0.0404	0.0404	1.45e-18	1.45e-18	NA	NA	0.0563987	FALSE	NA	NA	NA
ENST00000458113.6	ENSG00000141027.20	NCOR1	protein_coding	retained_intron	53.3449	49.0148	56.2317	0.145891	1.37317	0.19813	0.0206024	1.64756	1.01021	2.07247	0.082453	0.26906	1.02943	0.012457	0.03052	0.02065	0.0371	0.01645	0.384779	1.45e-18	NA	NA	0.999899	TRUE	NA	NA	NA
ENST00000475872.5	ENSG00000169221.13	TBC1D10B	protein_coding	retained_intron	39.5052	37.321	40.9613	1.62418	0.592878	0.13424	0.260398	1.0389	2.07876	0.345664	0.437357	0.345664	-2.55406	NA	0.0275	0.0563	0.0083	-0.048	0.453245	1.45e-18	NA	NA	0.025728	FALSE	NA	NA	NA
ENST00000436828.5	ENSG00000141027.20	NCOR1	protein_coding	protein_coding	53.3449	49.0148	56.2317	0.145891	1.37317	0.19813	0.0206024	3.37579	3.67792	3.17436	0.389919	0.207377	-0.211801	0.743088	0.06382	0.075	0.0563667	-0.0186333	0.459006	1.45e-18	FALSE	yes	0.946589	TRUE	no	NA	NA
ENST00000268712.7	ENSG00000141027.20	NCOR1	protein_coding	protein_coding	53.3449	49.0148	56.2317	0.145891	1.37317	0.19813	0.0206024	7.04641	7.49538	6.7471	0.0529781	0.584516	-0.151522	0.647071	0.13324	0.15295	0.1201	-0.03285	0.542768	1.45e-18	FALSE	yes	1	TRUE	no	NA	NA
ENST00000582565.1	ENSG00000141027.20	NCOR1	protein_coding	retained_intron	53.3449	49.0148	56.2317	0.145891	1.37317	0.19813	0.0206024	1.76005	1.2972	2.06862	0.384984	0.0910833	0.669144	NA	0.03268	0.02645	0.0368333	0.0103833	0.789102	1.45e-18	NA	NA	0.0777577	FALSE	NA	NA	NA
ENST00000395849.6	ENSG00000141027.20	NCOR1	protein_coding	protein_coding	53.3449	49.0148	56.2317	0.145891	1.37317	0.19813	0.0206024	8.26536	8.21893	8.29631	0.56243	0.572353	0.0135019	0.975735	0.15586	0.1677	0.147967	-0.0197333	0.893301	1.45e-18	NA	no	1	TRUE	no	NA	NA
ENST00000409939.7	ENSG00000169221.13	TBC1D10B	protein_coding	protein_coding	39.5052	37.321	40.9613	1.62418	0.592878	0.13424	0.260398	31.119	29.0539	32.4957	0.674904	0.676433	0.16146	0.10163	0.78762	0.7792	0.793233	0.0140333	0.923941	1.45e-18	FALSE	yes	1	TRUE	no	NA	NA
ENST00000395848.5	ENSG00000141027.20	NCOR1	protein_coding	protein_coding	53.3449	49.0148	56.2317	0.145891	1.37317	0.19813	0.0206024	0.734376	0.601463	0.822985	0.601463	0.0747871	0.446024	NA	0.01368	0.0123	0.0146	0.0023	0.927618	1.45e-18	FALSE	yes	1	TRUE	no	NA	NA
ENST00000583234.1	ENSG00000141027.20	NCOR1	protein_coding	retained_intron	53.3449	49.0148	56.2317	0.145891	1.37317	0.19813	0.0206024	0.56076	0.632498	0.512935	0.0811571	0.214047	-0.297062	NA	0.01052	0.0129	0.00893333	-0.00396667	0.935657	1.45e-18	NA	NA	0.100534	FALSE	NA	NA	NA
ENST00000466825.1	ENSG00000141027.20	NCOR1	protein_coding	processed_transcript	53.3449	49.0148	56.2317	0.145891	1.37317	0.19813	0.0206024	0.664613	0.368536	0.861998	0.0524884	0.426263	1.2039	NA	0.01228	0.0075	0.0154667	0.00796667	0.946973	1.45e-18	NA	NA	0.0286536	FALSE	NA	NA	NA
ENST00000580554.1	ENSG00000141027.20	NCOR1	protein_coding	protein_coding	53.3449	49.0148	56.2317	0.145891	1.37317	0.19813	0.0206024	1.23826	0.934083	1.44104	0.118477	0.323495	0.620104	NA	0.02296	0.01905	0.0255667	0.00651667	0.950075	1.45e-18	NA	no	0.0372954	FALSE	no	NA	NA
ENST00000436068.1	ENSG00000141027.20	NCOR1	protein_coding	protein_coding	53.3449	49.0148	56.2317	0.145891	1.37317	0.19813	0.0206024	4.21745	4.29179	4.16789	0.0615036	1.50622	-0.0421647	NA	0.07884	0.0876	0.073	-0.0146	0.958085	1.45e-18	NA	no	0.0435146	FALSE	no	NA	NA
ENST00000464381.5	ENSG00000141027.20	NCOR1	protein_coding	retained_intron	53.3449	49.0148	56.2317	0.145891	1.37317	0.19813	0.0206024	3.15468	2.54153	3.56345	0.104907	0.817976	0.485955	0.589196	0.05916	0.0519	0.064	0.0121	0.959638	1.45e-18	NA	NA	1	TRUE	NA	NA	NA
ENST00000470782.5	ENSG00000141027.20	NCOR1	protein_coding	retained_intron	53.3449	49.0148	56.2317	0.145891	1.37317	0.19813	0.0206024	0.640794	0.729755	0.581486	0.372927	0.393567	-0.322703	0.967217	0.01204	0.01495	0.0101	-0.00485	0.959638	1.45e-18	NA	NA	1	TRUE	NA	NA	NA
ENST00000579606.1	ENSG00000141027.20	NCOR1	protein_coding	protein_coding	53.3449	49.0148	56.2317	0.145891	1.37317	0.19813	0.0206024	0.836659	0.697315	0.929554	0.0244403	0.126867	0.409623	NA	0.01562	0.01425	0.0165333	0.00228333	0.959638	1.45e-18	NA	no	0.0300425	FALSE	no	NA	NA
ENST00000582357.5	ENSG00000141027.20	NCOR1	protein_coding	protein_coding	53.3449	49.0148	56.2317	0.145891	1.37317	0.19813	0.0206024	2.92215	2.97079	2.88972	0.74826	0.455238	-0.0397793	0.977883	0.05518	0.06065	0.0515333	-0.00911667	0.959638	1.45e-18	FALSE	yes	0.964104	TRUE	no	NA	NA
ENST00000478158.5	ENSG00000169221.13	TBC1D10B	protein_coding	retained_intron	39.5052	37.321	40.9613	1.62418	0.592878	0.13424	0.260398	1.08443	0.980559	1.15368	0.0018312	0.0892926	0.232383	0.725841	0.02748	0.0263	0.0282667	0.00196667	0.960674	1.45e-18	NA	NA	0.999815	TRUE	NA	NA	NA
ENST00000464644.1	ENSG00000169221.13	TBC1D10B	protein_coding	retained_intron	39.5052	37.321	40.9613	1.62418	0.592878	0.13424	0.260398	0.478157	0.667522	0.351915	0.637448	0.180241	-0.904617	NA	0.01206	0.01715	0.00866667	-0.00848333	0.97164	1.45e-18	NA	NA	0.132387	FALSE	NA	NA	NA
ENST00000395851.5	ENSG00000141027.20	NCOR1	protein_coding	protein_coding	53.3449	49.0148	56.2317	0.145891	1.37317	0.19813	0.0206024	11.4351	10.5834	12.0029	0.508868	0.291667	0.181426	0.142512	0.21448	0.2159	0.213533	-0.00236667	0.977563	1.45e-18	FALSE	yes	1	TRUE	no	NA	NA
ENST00000475650.1	ENSG00000169221.13	TBC1D10B	protein_coding	retained_intron	39.5052	37.321	40.9613	1.62418	0.592878	0.13424	0.260398	4.5965	4.28026	4.80733	0.491039	0.359756	0.167168	0.784401	0.11622	0.1143	0.1175	0.0032	0.989137	1.45e-18	NA	NA	0.998544	TRUE	NA	NA	NA
ENST00000395857.7	ENSG00000141027.20	NCOR1	protein_coding	protein_coding	53.3449	49.0148	56.2317	0.145891	1.37317	0.19813	0.0206024	0.553774	0.912459	0.31465	0.912459	0.0879349	-1.5066	0.825933	0.01078	0.01855	0.0056	-0.01295	0.993615	1.45e-18	FALSE	yes	1	TRUE	no	NA	NA
ENST00000375646.5	ENSG00000095787.21	WAC	protein_coding	protein_coding	100.514	99.3677	101.279	0.455098	2.74727	0.0274826	0.813101	2.73362	0.025061	4.53933	0.025061	0.924181	7.01964	1.09e-09	0.02678	0.00025	0.0444667	0.0442167	7.54e-18	7.54e-18	FALSE	yes	1	TRUE	no	NA	NA
ENST00000420266.5	ENSG00000095787.21	WAC	protein_coding	protein_coding	100.514	99.3677	101.279	0.455098	2.74727	0.0274826	0.813101	1.78051	2.87383	1.05162	0.939126	0.183072	-1.44172	NA	0.01784	0.02895	0.0104333	-0.0185167	0.127106	7.54e-18	FALSE	yes	0.2034	FALSE	no	NA	NA
ENST00000347934.8	ENSG00000095787.21	WAC	protein_coding	protein_coding	100.514	99.3677	101.279	0.455098	2.74727	0.0274826	0.813101	28.4346	29.5445	27.6947	0.488545	1.15025	-0.0932477	0.640231	0.2836	0.29735	0.274433	-0.0229167	0.895039	7.54e-18	FALSE	yes	1	TRUE	no	NA	NA
ENST00000530865.5	ENSG00000095787.21	WAC	protein_coding	retained_intron	100.514	99.3677	101.279	0.455098	2.74727	0.0274826	0.813101	2.76682	2.99075	2.61753	0.778419	0.494132	-0.191614	NA	0.0274	0.0301	0.0256	-0.0045	0.959638	7.54e-18	NA	NA	0.236807	FALSE	NA	NA	NA
ENST00000628285.2	ENSG00000095787.21	WAC	protein_coding	protein_coding	100.514	99.3677	101.279	0.455098	2.74727	0.0274826	0.813101	5.95206	5.76093	6.07948	0.143438	0.391911	0.0775159	0.848113	0.05926	0.05795	0.0601333	0.00218333	0.962683	7.54e-18	TRUE	no	1	TRUE	no	NA	NA
ENST00000354911.8	ENSG00000095787.21	WAC	protein_coding	protein_coding	100.514	99.3677	101.279	0.455098	2.74727	0.0274826	0.813101	44.3133	43.4406	44.8951	0.85701	1.6016	0.0475023	0.815004	0.44072	0.4372	0.443067	0.00586667	0.969858	7.54e-18	FALSE	yes	1	TRUE	no	NA	NA
ENST00000375664.8	ENSG00000095787.21	WAC	protein_coding	protein_coding	100.514	99.3677	101.279	0.455098	2.74727	0.0274826	0.813101	10.2859	10.1569	10.3719	0.282869	0.789647	0.0301875	0.942468	0.10216	0.1022	0.102133	-6.67e-05	0.984215	7.54e-18	FALSE	yes	1	TRUE	no	NA	NA
ENST00000462857.5	ENSG00000137404.14	NRM	protein_coding	processed_transcript	21.0093	22.4433	20.0532	0.159138	0.616274	-0.162376	0.568175	0.913837	0	1.52306	0	0.108463	7.26027	NA	0.0457	0	0.0761667	0.0761667	1.3e-17	1.3e-17	NA	NA	0.3646	NA	NA	NA	NA
ENST00000470733.1	ENSG00000137404.14	NRM	protein_coding	processed_transcript	21.0093	22.4433	20.0532	0.159138	0.616274	-0.162376	0.568175	1.01373	2.24248	0.194554	0.203467	0.189679	-3.46096	NA	0.04618	0.1	0.0103	-0.0897	0.322372	1.3e-17	NA	NA	0.95824	TRUE	NA	NA	NA
ENST00000474864.5	ENSG00000137404.14	NRM	protein_coding	processed_transcript	21.0093	22.4433	20.0532	0.159138	0.616274	-0.162376	0.568175	4.73997	6.38029	3.64642	0.776656	2.15536	-0.805449	0.696606	0.2208	0.28405	0.178633	-0.105417	0.849642	1.3e-17	NA	NA	0.440594	NA	NA	NA	NA
ENST00000482141.5	ENSG00000137404.14	NRM	protein_coding	processed_transcript	21.0093	22.4433	20.0532	0.159138	0.616274	-0.162376	0.568175	1.37375	0.356828	2.0517	0.356828	1.14547	2.49066	NA	0.06838	0.0158	0.103433	0.0876333	0.932403	1.3e-17	NA	NA	0.943827	TRUE	NA	NA	NA
ENST00000444096.5	ENSG00000137404.14	NRM	protein_coding	protein_coding	21.0093	22.4433	20.0532	0.159138	0.616274	-0.162376	0.568175	4.31499	4.36783	4.27977	0.087418	0.378469	-0.0293171	0.968377	0.20544	0.1946	0.212667	0.0180667	0.953044	1.3e-17	NA	no	0.991867	TRUE	no	NA	NA
ENST00000376421.6	ENSG00000137404.14	NRM	protein_coding	protein_coding	21.0093	22.4433	20.0532	0.159138	0.616274	-0.162376	0.568175	2.07834	2.01945	2.1176	0.877599	0.404848	0.068137	0.966911	0.09938	0.09025	0.105467	0.0152167	0.959638	1.3e-17	FALSE	no	0.999909	TRUE	no	NA	NA
ENST00000495946.5	ENSG00000137404.14	NRM	protein_coding	processed_transcript	21.0093	22.4433	20.0532	0.159138	0.616274	-0.162376	0.568175	0.394989	0.491195	0.330851	0.491195	0.330851	-0.556229	NA	0.01854	0.02205	0.0162	-0.00585	0.959638	1.3e-17	NA	NA	0.76596	TRUE	NA	NA	NA
ENST00000376420.9	ENSG00000137404.14	NRM	protein_coding	protein_coding	21.0093	22.4433	20.0532	0.159138	0.616274	-0.162376	0.568175	6.17969	6.58528	5.9093	0.510498	0.903383	-0.156007	0.874489	0.29558	0.29325	0.297133	0.00388333	0.998758	1.3e-17	FALSE	no	0.997559	TRUE	no	NA	NA
ENST00000555380.1	ENSG00000142208.15	AKT1	protein_coding	processed_transcript	195.174	188.517	199.613	5.28124	4.10627	0.0825038	0.370246	2.49596	6.23991	0	2.10986	0	-9.28769	NA	0.01312	0.0328	0	-0.0328	1.46e-17	1.46e-17	NA	NA	0.0566917	FALSE	NA	NA	NA
ENST00000555926.1	ENSG00000142208.15	AKT1	protein_coding	protein_coding	195.174	188.517	199.613	5.28124	4.10627	0.0825038	0.370246	5.16947	3.08948	6.55614	0.459151	0.905422	1.08302	NA	0.02622	0.0165	0.0327	0.0162	0.052206	1.46e-17	FALSE	yes	0.11239	FALSE	no	NA	NA
ENST00000554826.1	ENSG00000142208.15	AKT1	protein_coding	retained_intron	195.174	188.517	199.613	5.28124	4.10627	0.0825038	0.370246	3.79205	2.30843	4.78112	0.423848	0.797887	1.04721	NA	0.01926	0.0122	0.0239667	0.0117667	0.227251	1.46e-17	NA	NA	0.166173	FALSE	NA	NA	NA
ENST00000402615.6	ENSG00000142208.15	AKT1	protein_coding	protein_coding	195.174	188.517	199.613	5.28124	4.10627	0.0825038	0.370246	5.01121	5.51063	4.67826	0.453876	0.348528	-0.235781	0.491028	0.02584	0.02935	0.0235	-0.00585	0.73304	1.46e-17	FALSE	yes	1	TRUE	no	NA	NA
ENST00000407796.6	ENSG00000142208.15	AKT1	protein_coding	protein_coding	195.174	188.517	199.613	5.28124	4.10627	0.0825038	0.370246	142.749	134.624	148.167	3.8457	2.32896	0.138277	0.067161	0.73116	0.7141	0.742533	0.0284333	0.867306	1.46e-17	FALSE	yes	1	TRUE	no	NA	NA
ENST00000555528.5	ENSG00000142208.15	AKT1	protein_coding	protein_coding	195.174	188.517	199.613	5.28124	4.10627	0.0825038	0.370246	3.77651	4.4831	3.30546	1.76649	0.322726	-0.4385	0.60151	0.01936	0.0235	0.0166	-0.0069	0.904508	1.46e-17	FALSE	yes	1	TRUE	no	NA	NA
ENST00000556836.1	ENSG00000142208.15	AKT1	protein_coding	retained_intron	195.174	188.517	199.613	5.28124	4.10627	0.0825038	0.370246	6.31358	5.50884	6.85007	0.66618	0.426664	0.313857	0.727281	0.03238	0.02935	0.0344	0.00505	0.933512	1.46e-17	NA	NA	0.111021	FALSE	NA	NA	NA
ENST00000553506.5	ENSG00000142208.15	AKT1	protein_coding	retained_intron	195.174	188.517	199.613	5.28124	4.10627	0.0825038	0.370246	6.17356	6.25995	6.11597	0.306024	0.151602	-0.033515	0.94894	0.03172	0.03325	0.0307	-0.00255	0.937959	1.46e-17	NA	NA	0.993122	TRUE	NA	NA	NA
ENST00000610370.1	ENSG00000142208.15	AKT1	protein_coding	retained_intron	195.174	188.517	199.613	5.28124	4.10627	0.0825038	0.370246	2.10115	2.08873	2.10944	0.143996	0.125632	0.0141686	0.993807	0.01074	0.01105	0.0105333	-0.000516667	0.959638	1.46e-17	NA	NA	0.615942	TRUE	NA	NA	NA
ENST00000554585.5	ENSG00000142208.15	AKT1	protein_coding	nonsense_mediated_decay	195.174	188.517	199.613	5.28124	4.10627	0.0825038	0.370246	2.02391	2.07994	1.98656	0.897307	0.689901	-0.0659399	NA	0.01038	0.01115	0.00986667	-0.00128333	0.969964	1.46e-17	TRUE	yes	0.963431	TRUE	no	NA	NA
ENST00000554848.5	ENSG00000142208.15	AKT1	protein_coding	protein_coding	195.174	188.517	199.613	5.28124	4.10627	0.0825038	0.370246	10.1906	9.57682	10.5998	0.424553	2.66185	0.146273	0.909486	0.0519	0.05075	0.0526667	0.00191667	0.982901	1.46e-17	FALSE	yes	1	TRUE	no	NA	NA
ENST00000543304.5	ENSG00000214530.8	STARD10	protein_coding	protein_coding	516.084	466.523	549.125	27.2042	20.3769	0.235182	0.0143051	69.7092	49.6646	83.0722	3.4823	2.91113	0.742031	4.64e-12	0.13338	0.10635	0.1514	0.04505	2.15e-17	2.15e-17	FALSE	yes	0.999997	TRUE	no	NA	NA
ENST00000538437.5	ENSG00000214530.8	STARD10	protein_coding	processed_transcript	516.084	466.523	549.125	27.2042	20.3769	0.235182	0.0143051	39.9305	39.6992	40.0847	0.132958	0.910132	0.0139365	0.965381	0.07802	0.0854	0.0731	-0.0123	0.20615	2.15e-17	NA	NA	0.2155	FALSE	NA	NA	NA
ENST00000537947.5	ENSG00000214530.8	STARD10	protein_coding	protein_coding	516.084	466.523	549.125	27.2042	20.3769	0.235182	0.0143051	7.54775	16.0902	1.85277	7.57734	1.85277	-3.11156	0.749877	0.01622	0.03555	0.00333333	-0.0322167	0.409382	2.15e-17	FALSE	yes	0.417515	NA	no	NA	NA
ENST00000543089.1	ENSG00000214530.8	STARD10	protein_coding	retained_intron	516.084	466.523	549.125	27.2042	20.3769	0.235182	0.0143051	138.534	130.679	143.771	6.52667	6.11324	0.137738	0.545048	0.26924	0.28025	0.2619	-0.01835	0.586557	2.15e-17	NA	NA	0.317819	NA	NA	NA	NA
ENST00000544767.5	ENSG00000214530.8	STARD10	protein_coding	protein_coding	516.084	466.523	549.125	27.2042	20.3769	0.235182	0.0143051	31.9371	24.3078	37.0233	6.07349	4.22312	0.606807	0.244815	0.0611	0.0515	0.0675	0.016	0.725476	2.15e-17	FALSE	yes	0.146718	FALSE	no	NA	NA
ENST00000536728.5	ENSG00000214530.8	STARD10	protein_coding	protein_coding	516.084	466.523	549.125	27.2042	20.3769	0.235182	0.0143051	62.4535	59.2658	64.5786	0.990761	5.74812	0.123835	0.787741	0.12138	0.1276	0.117233	-0.0103667	0.93448	2.15e-17	FALSE	yes	0.121329	FALSE	no	NA	NA
ENST00000542989.5	ENSG00000214530.8	STARD10	protein_coding	protein_coding	516.084	466.523	549.125	27.2042	20.3769	0.235182	0.0143051	25.1314	19.7645	28.7093	3.75555	7.40872	0.538381	0.480956	0.04788	0.042	0.0518	0.0098	0.959638	2.15e-17	FALSE	yes	0.210068	FALSE	no	NA	NA
ENST00000546314.5	ENSG00000214530.8	STARD10	protein_coding	protein_coding	516.084	466.523	549.125	27.2042	20.3769	0.235182	0.0143051	33.6454	31.1247	35.3258	4.68039	6.66712	0.182608	0.853474	0.06526	0.06635	0.0645333	-0.00181667	0.968708	2.15e-17	FALSE	yes	0.0856296	FALSE	no	NA	NA
ENST00000545082.5	ENSG00000214530.8	STARD10	protein_coding	protein_coding	516.084	466.523	549.125	27.2042	20.3769	0.235182	0.0143051	6.34247	5.66794	6.79216	0.816133	0.126195	0.260627	0.663299	0.01226	0.01205	0.0124	0.00035	0.977115	2.15e-17	FALSE	yes	0.999984	TRUE	no	NA	NA
ENST00000535267.1	ENSG00000214530.8	STARD10	protein_coding	retained_intron	516.084	466.523	549.125	27.2042	20.3769	0.235182	0.0143051	80.9463	72.988	86.2519	10.2854	6.02502	0.240868	0.507392	0.1566	0.1557	0.1572	0.0015	0.98284	2.15e-17	NA	NA	0.901915	TRUE	NA	NA	NA
ENST00000388913.3	ENSG00000180921.6	FAM83H	protein_coding	protein_coding	45.5106	41.41	48.2444	2.21469	1.91845	0.220331	0.0247091	44.5924	41.41	46.7139	2.21469	1.91341	0.173833	0.225137	0.98092	1	0.9682	-0.0318	4.3e-17	4.3e-17	FALSE	yes	1	TRUE	no	NA	NA
ENST00000395103.2	ENSG00000180921.6	FAM83H	protein_coding	nonsense_mediated_decay	45.5106	41.41	48.2444	2.21469	1.91845	0.220331	0.0247091	0.918265	0	1.53044	0	0.198947	7.2672	8.61e-08	0.01908	0	0.0318	0.0318	1.74e-12	4.3e-17	NA	no	1	TRUE	no	NA	NA
ENST00000407893.3	ENSG00000162959.13	MEMO1	protein_coding	protein_coding	48.6045	49.4141	48.0647	0.154317	1.29873	-0.0399388	0.911894	1.017	0	1.69499	0	0.158362	7.41362	NA	0.02118	0	0.0353	0.0353	7.77e-17	7.77e-17	FALSE	yes	0.1435	FALSE	no	NA	NA
ENST00000422936.5	ENSG00000162959.13	MEMO1	protein_coding	processed_transcript	48.6045	49.4141	48.0647	0.154317	1.29873	-0.0399388	0.911894	1.71612	2.24496	1.36357	0.0897149	0.198685	-0.71517	NA	0.03528	0.04545	0.0285	-0.01695	0.497429	7.77e-17	NA	NA	0.024972	FALSE	NA	NA	NA
ENST00000404530.5	ENSG00000162959.13	MEMO1	protein_coding	protein_coding	48.6045	49.4141	48.0647	0.154317	1.29873	-0.0399388	0.911894	35.0956	36.433	34.204	0.61589	0.593759	-0.091054	0.619346	0.72212	0.73725	0.712033	-0.0252167	0.678807	7.77e-17	FALSE	yes	0.999994	TRUE	no	NA	NA
ENST00000413686.1	ENSG00000162959.13	MEMO1	protein_coding	processed_transcript	48.6045	49.4141	48.0647	0.154317	1.29873	-0.0399388	0.911894	5.21036	4.689	5.55793	1.01005	0.603864	0.244788	0.828107	0.10708	0.09485	0.115233	0.0203833	0.898752	7.77e-17	NA	NA	0.765323	TRUE	NA	NA	NA
ENST00000295065.9	ENSG00000162959.13	MEMO1	protein_coding	protein_coding	48.6045	49.4141	48.0647	0.154317	1.29873	-0.0399388	0.911894	0.787946	0.849473	0.746928	0.0374982	0.0573425	-0.183298	0.842694	0.01622	0.0172	0.0155667	-0.00163333	0.959638	7.77e-17	FALSE	yes	0.998637	TRUE	no	NA	NA
ENST00000490459.5	ENSG00000162959.13	MEMO1	protein_coding	processed_transcript	48.6045	49.4141	48.0647	0.154317	1.29873	-0.0399388	0.911894	0.96534	1.13696	0.850926	0.0358924	0.461547	-0.413855	NA	0.01954	0.023	0.0172333	-0.00576667	0.959638	7.77e-17	NA	NA	0.518301	TRUE	NA	NA	NA
ENST00000426310.6	ENSG00000162959.13	MEMO1	protein_coding	protein_coding	48.6045	49.4141	48.0647	0.154317	1.29873	-0.0399388	0.911894	3.67333	4.06074	3.41506	1.56294	0.509109	-0.249161	0.876804	0.0758	0.0823	0.0714667	-0.0108333	0.965861	7.77e-17	FALSE	yes	0.999927	TRUE	no	NA	NA
ENST00000244458.6	ENSG00000124507.10	PACSIN1	protein_coding	protein_coding	3.55932	3.03989	3.9056	0.253115	0.177159	0.360475	0.205014	1.09526	2.27079	0.311571	0.155641	0.0827266	-2.82632	2.41e-09	0.34702	0.7479	0.0797667	-0.668133	8.45e-17	8.45e-17	FALSE	yes	1	TRUE	no	0	FALSE
ENST00000483697.2	ENSG00000163558.12	PRKCI	protein_coding	retained_intron	33.8434	35.016	33.0616	0.18963	2.46872	-0.0828331	0.73998	0.901148	0	1.50191	0	0.216585	7.24023	NA	0.02698	0	0.0449667	0.0449667	8.45e-17	8.45e-17	NA	NA	0.0280794	FALSE	NA	NA	NA
ENST00000620693.4	ENSG00000124507.10	PACSIN1	protein_coding	protein_coding	3.55932	3.03989	3.9056	0.253115	0.177159	0.360475	0.205014	0.901135	0	1.50189	0	0.663718	7.24021	4.63e-07	0.23634	0	0.3939	0.3939	0.0116544	8.45e-17	FALSE	yes	1	TRUE	no	0	FALSE
ENST00000493633.5	ENSG00000124507.10	PACSIN1	protein_coding	processed_transcript	3.55932	3.03989	3.9056	0.253115	0.177159	0.360475	0.205014	0.0911999	0	0.152	0	0.0225909	4.01792	NA	0.02344	0	0.0390667	0.0390667	0.1569	8.45e-17	NA	NA	0.274775	NA	NA	0	FALSE
ENST00000476635.5	ENSG00000163558.12	PRKCI	protein_coding	retained_intron	33.8434	35.016	33.0616	0.18963	2.46872	-0.0828331	0.73998	0.573469	0.768937	0.443157	0.0772544	0.0412681	-0.781497	NA	0.01682	0.02195	0.0134	-0.00855	0.589207	8.45e-17	NA	NA	0.962135	TRUE	NA	NA	NA
ENST00000486120.5	ENSG00000124507.10	PACSIN1	protein_coding	processed_transcript	3.55932	3.03989	3.9056	0.253115	0.177159	0.360475	0.205014	0.167619	0	0.279365	0	0.184066	4.85482	NA	0.04072	0	0.0678667	0.0678667	0.629938	8.45e-17	NA	NA	0.22477	FALSE	NA	0	FALSE
ENST00000295797.4	ENSG00000163558.12	PRKCI	protein_coding	protein_coding	33.8434	35.016	33.0616	0.18963	2.46872	-0.0828331	0.73998	24.2595	26.7442	22.6031	0.502076	0.745742	-0.242607	0.00837157	0.72002	0.7637	0.6909	-0.0728	0.809364	8.45e-17	FALSE	yes	1	TRUE	no	NA	NA
ENST00000374043.6	ENSG00000124507.10	PACSIN1	protein_coding	protein_coding	3.55932	3.03989	3.9056	0.253115	0.177159	0.360475	0.205014	1.30411	0.769108	1.66077	0.0974739	0.563095	1.10062	0.310892	0.3525	0.2521	0.419433	0.167333	0.924811	8.45e-17	FALSE	yes	1	TRUE	no	0	FALSE
ENST00000482353.2	ENSG00000163558.12	PRKCI	protein_coding	retained_intron	33.8434	35.016	33.0616	0.18963	2.46872	-0.0828331	0.73998	0.446419	0.461998	0.436033	0.241462	0.335912	-0.0816309	NA	0.01278	0.01325	0.0124667	-0.000783333	0.959638	8.45e-17	NA	NA	0.0526611	FALSE	NA	NA	NA
ENST00000485837.5	ENSG00000163558.12	PRKCI	protein_coding	retained_intron	33.8434	35.016	33.0616	0.18963	2.46872	-0.0828331	0.73998	3.50102	3.24988	3.66845	1.77629	1.11643	0.174279	NA	0.10248	0.0931	0.108733	0.0156333	0.959638	8.45e-17	NA	NA	0.992708	TRUE	NA	NA	NA
ENST00000488541.1	ENSG00000163558.12	PRKCI	protein_coding	retained_intron	33.8434	35.016	33.0616	0.18963	2.46872	-0.0828331	0.73998	3.93398	3.42611	4.27256	1.89684	1.19261	0.317701	NA	0.11408	0.09755	0.1251	0.02755	0.959638	8.45e-17	NA	NA	0.0532872	FALSE	NA	NA	NA
ENST00000258530.7	ENSG00000136044.11	APPL2	protein_coding	protein_coding	19.5731	16.7395	21.4622	0.121521	0.544303	0.358356	0.00515737	15.2828	14.1936	16.0089	0.0692767	0.222337	0.173517	0.131913	0.78736	0.848	0.746933	-0.101067	0.0105347	4.27e-16	FALSE	yes	1	TRUE	no	0	NA
ENST00000549056.1	ENSG00000136044.11	APPL2	protein_coding	protein_coding	19.5731	16.7395	21.4622	0.121521	0.544303	0.358356	0.00515737	0.685311	0.263194	0.966721	0.0426579	0.0447146	1.83802	NA	0.03332	0.01575	0.0450333	0.0292833	0.0206337	4.27e-16	FALSE	yes	0.0632356	FALSE	no	0	NA
ENST00000547790.1	ENSG00000136044.11	APPL2	protein_coding	retained_intron	19.5731	16.7395	21.4622	0.121521	0.544303	0.358356	0.00515737	1.04772	0	1.7462	0	0.155784	7.45632	NA	0.04866	0	0.0811	0.0811	4.27e-16	4.27e-16	NA	NA	0.0537454	FALSE	NA	0	NA
ENST00000539978.6	ENSG00000136044.11	APPL2	protein_coding	protein_coding	19.5731	16.7395	21.4622	0.121521	0.544303	0.358356	0.00515737	0.537456	0.786255	0.37159	0.266306	0.141265	-1.06121	NA	0.02898	0.04685	0.0170667	-0.0297833	0.607325	4.27e-16	FALSE	yes	1	TRUE	no	0	NA
ENST00000546731.1	ENSG00000136044.11	APPL2	protein_coding	protein_coding	19.5731	16.7395	21.4622	0.121521	0.544303	0.358356	0.00515737	0.584002	0.608718	0.567525	0.257864	0.10148	-0.0993977	NA	0.03048	0.03645	0.0265	-0.00995	0.959638	4.27e-16	FALSE	no	0.835787	TRUE	no	0	NA
ENST00000551662.5	ENSG00000136044.11	APPL2	protein_coding	protein_coding	19.5731	16.7395	21.4622	0.121521	0.544303	0.358356	0.00515737	0.350707	0.258609	0.412105	0.0982188	0.150022	0.652095	NA	0.01786	0.0155	0.0194333	0.00393333	0.964874	4.27e-16	FALSE	yes	1	TRUE	no	0	NA
ENST00000552945.1	ENSG00000136044.11	APPL2	protein_coding	processed_transcript	19.5731	16.7395	21.4622	0.121521	0.544303	0.358356	0.00515737	0.27127	0.370902	0.204848	0.370902	0.104448	-0.826106	NA	0.01468	0.022	0.0098	-0.0122	0.993609	4.27e-16	NA	NA	0.276886	NA	NA	0	NA
ENST00000497064.1	ENSG00000169155.9	ZBTB43	protein_coding	processed_transcript	7.45368	9.22699	6.27148	0.896724	0.45832	-0.556319	0.00297516	1.2044	3.01099	0	0.176762	0	-8.23888	NA	0.13254	0.33135	0	-0.33135	1.51e-15	1.51e-15	NA	NA	0.00409395	FALSE	NA	0	TRUE
ENST00000449886.5	ENSG00000169155.9	ZBTB43	protein_coding	protein_coding	7.45368	9.22699	6.27148	0.896724	0.45832	-0.556319	0.00297516	1.08206	0.822	1.25543	0.822	0.361122	0.604969	0.94085	0.15638	0.0987	0.194833	0.0961333	0.850947	1.51e-15	FALSE	yes	1	TRUE	no	1	TRUE
ENST00000450858.1	ENSG00000169155.9	ZBTB43	protein_coding	protein_coding	7.45368	9.22699	6.27148	0.896724	0.45832	-0.556319	0.00297516	1.37003	1.10617	1.54594	1.10617	0.554068	0.479239	NA	0.18506	0.10925	0.2356	0.12635	0.853766	1.51e-15	FALSE	yes	0.283649	NA	no	0	TRUE
ENST00000373464.4	ENSG00000169155.9	ZBTB43	protein_coding	protein_coding	7.45368	9.22699	6.27148	0.896724	0.45832	-0.556319	0.00297516	3.78504	4.27254	3.46004	0.774026	0.476521	-0.303515	0.609393	0.52428	0.45925	0.567633	0.108383	0.940889	1.51e-15	FALSE	yes	1	TRUE	no	1	TRUE
ENST00000400903.6	ENSG00000162441.11	LZIC	protein_coding	protein_coding	33.5857	37.6365	30.8851	0.676595	0.362574	-0.285138	0.0729616	0.76727	0	1.27878	0	0.0939072	7.00987	NA	0.0249	0	0.0415	0.0415	1.64e-15	1.64e-15	FALSE	yes	0.998967	TRUE	no	NA	NA
ENST00000377213.1	ENSG00000162441.11	LZIC	protein_coding	protein_coding	33.5857	37.6365	30.8851	0.676595	0.362574	-0.285138	0.0729616	19.3178	22.153	17.4277	0.101092	0.300046	-0.345946	0.0688234	0.57406	0.58885	0.5642	-0.02465	0.81339	1.64e-15	FALSE	yes	0.999087	TRUE	no	NA	NA
ENST00000488540.5	ENSG00000162441.11	LZIC	protein_coding	protein_coding	33.5857	37.6365	30.8851	0.676595	0.362574	-0.285138	0.0729616	1.29027	1.70792	1.01183	0.657831	0.127389	-0.749507	NA	0.03796	0.0457	0.0328	-0.0129	0.954732	1.64e-15	FALSE	yes	0.938251	TRUE	no	NA	NA
ENST00000471853.1	ENSG00000162441.11	LZIC	protein_coding	retained_intron	33.5857	37.6365	30.8851	0.676595	0.362574	-0.285138	0.0729616	0.761638	0.801058	0.735358	0.289815	0.123418	-0.121872	NA	0.02278	0.02115	0.0238667	0.00271667	0.960153	1.64e-15	NA	NA	0.141408	FALSE	NA	NA	NA
ENST00000377223.5	ENSG00000162441.11	LZIC	protein_coding	protein_coding	33.5857	37.6365	30.8851	0.676595	0.362574	-0.285138	0.0729616	11.4486	12.9745	10.4314	1.1457	0.341467	-0.314471	0.132117	0.34028	0.34425	0.337633	-0.00661667	0.9648	1.64e-15	FALSE	yes	0.997772	TRUE	no	NA	NA
ENST00000368097.8	ENSG00000158710.14	TAGLN2	protein_coding	protein_coding	234.464	241.148	230.007	6.28659	0.176684	-0.0682356	0.604878	227.422	229.481	226.05	4.91436	0.0577157	-0.021728	0.881585	0.97038	0.95175	0.9828	0.03105	2.68e-15	2.68e-15	FALSE	yes	0.995093	TRUE	no	NA	NA
ENST00000320307.8	ENSG00000158710.14	TAGLN2	protein_coding	protein_coding	234.464	241.148	230.007	6.28659	0.176684	-0.0682356	0.604878	2.5549	6.03965	0.231738	1.73919	0.231738	-4.64534	NA	0.01054	0.02485	0.001	-0.02385	0.137993	2.68e-15	FALSE	yes	0.998927	TRUE	no	NA	NA
ENST00000478033.1	ENSG00000158710.14	TAGLN2	protein_coding	processed_transcript	234.464	241.148	230.007	6.28659	0.176684	-0.0682356	0.604878	4.17848	5.26945	3.45117	0.284059	0.403536	-0.609128	0.299319	0.01774	0.02185	0.015	-0.00685	0.435846	2.68e-15	NA	NA	0.982741	TRUE	NA	NA	NA
ENST00000485205.5	ENSG00000144645.13	OSBPL10	protein_coding	processed_transcript	16.2827	17.5273	15.453	0.997121	1.03611	-0.18161	0.410487	0.683315	1.70829	0	0.0159058	0	-7.42483	NA	0.03914	0.09785	0	-0.09785	3.6e-15	3.6e-15	NA	NA	0.113845	FALSE	NA	NA	NA
ENST00000438237.6	ENSG00000144645.13	OSBPL10	protein_coding	protein_coding	16.2827	17.5273	15.453	0.997121	1.03611	-0.18161	0.410487	6.25243	6.16058	6.31366	0.496804	0.488271	0.0353535	0.952331	0.386	0.351	0.409333	0.0583333	0.652672	3.6e-15	FALSE	yes	1	TRUE	no	NA	NA
ENST00000396556.6	ENSG00000144645.13	OSBPL10	protein_coding	protein_coding	16.2827	17.5273	15.453	0.997121	1.03611	-0.18161	0.410487	4.53357	4.39204	4.62792	0.0387403	0.146456	0.0753074	0.786009	0.2823	0.2515	0.302833	0.0513333	0.823146	3.6e-15	FALSE	yes	1	TRUE	no	NA	NA
ENST00000466604.5	ENSG00000144645.13	OSBPL10	protein_coding	processed_transcript	16.2827	17.5273	15.453	0.997121	1.03611	-0.18161	0.410487	0.456522	0.706254	0.290034	0.435595	0.181923	-1.25534	NA	0.02712	0.039	0.0192	-0.0198	0.935667	3.6e-15	NA	NA	0.743711	TRUE	NA	NA	NA
ENST00000467955.5	ENSG00000144645.13	OSBPL10	protein_coding	processed_transcript	16.2827	17.5273	15.453	0.997121	1.03611	-0.18161	0.410487	3.95054	3.9958	3.92037	0.274593	0.777674	-0.0274244	NA	0.24128	0.2296	0.249067	0.0194667	0.960166	3.6e-15	NA	NA	0.189969	FALSE	NA	NA	NA
ENST00000429492.6	ENSG00000144645.13	OSBPL10	protein_coding	protein_coding	16.2827	17.5273	15.453	0.997121	1.03611	-0.18161	0.410487	0.246185	0.248329	0.244756	0.077914	0.0225919	-0.0200913	NA	0.01518	0.01395	0.016	0.00205	0.979661	3.6e-15	NA	no	1	TRUE	no	NA	NA
ENST00000593035.5	ENSG00000134779.14	TPGS2	protein_coding	protein_coding	79.8019	81.4513	78.7022	5.74717	2.44724	-0.0495276	0.856874	25.7036	30.4222	22.5579	1.09082	1.86989	-0.431325	0.0383563	0.32116	0.3744	0.285667	-0.0887333	0.0189166	4.26e-15	FALSE	no	0.999808	TRUE	no	NA	NA
ENST00000383056.7	ENSG00000134779.14	TPGS2	protein_coding	protein_coding	79.8019	81.4513	78.7022	5.74717	2.44724	-0.0495276	0.856874	9.83685	5.78499	12.5381	0.311671	0.223318	1.11459	6.34e-13	0.1243	0.0711	0.159767	0.0886667	4.26e-15	4.26e-15	FALSE	no	0.998326	TRUE	no	NA	NA
ENST00000587129.5	ENSG00000134779.14	TPGS2	protein_coding	protein_coding	79.8019	81.4513	78.7022	5.74717	2.44724	-0.0495276	0.856874	26.8674	24.7925	28.2506	1.21514	1.42477	0.188307	0.51939	0.33722	0.30485	0.3588	0.05395	0.123	4.26e-15	FALSE	no	0.999975	TRUE	no	NA	NA
ENST00000590500.5	ENSG00000134779.14	TPGS2	protein_coding	protein_coding	79.8019	81.4513	78.7022	5.74717	2.44724	-0.0495276	0.856874	1.48596	2.98041	0.48966	0.207347	0.48966	-2.58132	NA	0.01874	0.03695	0.0066	-0.03035	0.452812	4.26e-15	FALSE	no	0.127441	FALSE	no	NA	NA
ENST00000590842.5	ENSG00000134779.14	TPGS2	protein_coding	protein_coding	79.8019	81.4513	78.7022	5.74717	2.44724	-0.0495276	0.856874	3.44936	3.29332	3.55339	0.336127	0.142939	0.109333	0.910817	0.04322	0.04035	0.0451333	0.00478333	0.924882	4.26e-15	FALSE	no	0.999994	TRUE	no	NA	NA
ENST00000590692.5	ENSG00000134779.14	TPGS2	protein_coding	nonsense_mediated_decay	79.8019	81.4513	78.7022	5.74717	2.44724	-0.0495276	0.856874	1.8136	2.08098	1.63534	0.174504	0.97985	-0.345792	NA	0.02248	0.02585	0.0202333	-0.00561667	0.941573	4.26e-15	TRUE	no	0.0660373	FALSE	no	NA	NA
ENST00000334295.8	ENSG00000134779.14	TPGS2	protein_coding	protein_coding	79.8019	81.4513	78.7022	5.74717	2.44724	-0.0495276	0.856874	2.9846	3.2702	2.7942	0.00777473	0.341626	-0.226197	0.656784	0.03762	0.04035	0.0358	-0.00455	0.958566	4.26e-15	FALSE	no	0.999645	TRUE	no	NA	NA
ENST00000589049.5	ENSG00000134779.14	TPGS2	protein_coding	protein_coding	79.8019	81.4513	78.7022	5.74717	2.44724	-0.0495276	0.856874	3.41035	3.71659	3.20619	0.779442	0.283094	-0.212503	0.831463	0.0427	0.0452	0.0410333	-0.00416667	0.959638	4.26e-15	FALSE	no	0.999901	TRUE	no	NA	NA
ENST00000591823.5	ENSG00000134779.14	TPGS2	protein_coding	nonsense_mediated_decay	79.8019	81.4513	78.7022	5.74717	2.44724	-0.0495276	0.856874	2.90168	3.60468	2.43301	2.49197	0.408401	-0.565207	NA	0.03562	0.0423	0.0311667	-0.0111333	0.97407	4.26e-15	TRUE	no	0.997778	TRUE	no	NA	NA
ENST00000493792.1	ENSG00000171853.15	TRAPPC12	protein_coding	retained_intron	34.5857	30.442	37.3482	2.8449	0.449278	0.294886	0.0948063	0.948249	0	1.58042	0	0.127338	7.31326	NA	0.02536	0	0.0422667	0.0422667	6.25e-15	6.25e-15	NA	NA	0.309278	NA	NA	NA	NA
ENST00000482645.1	ENSG00000171853.15	TRAPPC12	protein_coding	retained_intron	34.5857	30.442	37.3482	2.8449	0.449278	0.294886	0.0948063	0.572618	0.627145	0.536267	0.0457304	0.14945	-0.222014	NA	0.01684	0.02065	0.0143	-0.00635	0.924686	6.25e-15	NA	NA	1	TRUE	NA	NA	NA
ENST00000489032.5	ENSG00000171853.15	TRAPPC12	protein_coding	retained_intron	34.5857	30.442	37.3482	2.8449	0.449278	0.294886	0.0948063	0.901253	0.911071	0.894709	0.149217	0.168636	-0.0258588	NA	0.0263	0.02975	0.024	-0.00575	0.929543	6.25e-15	NA	NA	0.234311	FALSE	NA	NA	NA
ENST00000462983.5	ENSG00000171853.15	TRAPPC12	protein_coding	processed_transcript	34.5857	30.442	37.3482	2.8449	0.449278	0.294886	0.0948063	0.432884	0.52545	0.371173	0.0258912	0.18852	-0.490306	NA	0.01292	0.0175	0.00986667	-0.00763333	0.935703	6.25e-15	NA	NA	0.553718	TRUE	NA	NA	NA
ENST00000324266.9	ENSG00000171853.15	TRAPPC12	protein_coding	protein_coding	34.5857	30.442	37.3482	2.8449	0.449278	0.294886	0.0948063	9.105	8.22263	9.69325	0.473775	0.353554	0.237116	0.288704	0.26404	0.27105	0.259367	-0.0116833	0.959638	6.25e-15	FALSE	yes	1	TRUE	no	NA	NA
ENST00000382110.6	ENSG00000171853.15	TRAPPC12	protein_coding	protein_coding	34.5857	30.442	37.3482	2.8449	0.449278	0.294886	0.0948063	0.727165	0.781072	0.691228	0.281513	0.439799	-0.173926	NA	0.02192	0.02675	0.0187	-0.00805	0.959638	6.25e-15	FALSE	yes	1	TRUE	no	NA	NA
ENST00000416918.5	ENSG00000171853.15	TRAPPC12	protein_coding	protein_coding	34.5857	30.442	37.3482	2.8449	0.449278	0.294886	0.0948063	11.4737	10.5507	12.089	0.22554	0.904842	0.196189	0.814548	0.33372	0.3489	0.3236	-0.0253	0.959638	6.25e-15	NA	no	0.311168	NA	no	NA	NA
ENST00000469147.5	ENSG00000171853.15	TRAPPC12	protein_coding	processed_transcript	34.5857	30.442	37.3482	2.8449	0.449278	0.294886	0.0948063	0.543017	0.516791	0.5605	0.145889	0.0810045	0.114997	NA	0.01564	0.01665	0.0149667	-0.00168333	0.959638	6.25e-15	NA	NA	0.981422	TRUE	NA	NA	NA
ENST00000469400.1	ENSG00000171853.15	TRAPPC12	protein_coding	processed_transcript	34.5857	30.442	37.3482	2.8449	0.449278	0.294886	0.0948063	0.780555	0.31095	1.09363	0.31095	0.633229	1.78183	NA	0.02134	0.00935	0.0293333	0.0199833	0.959638	6.25e-15	NA	NA	0.711902	TRUE	NA	NA	NA
ENST00000479897.5	ENSG00000171853.15	TRAPPC12	protein_coding	retained_intron	34.5857	30.442	37.3482	2.8449	0.449278	0.294886	0.0948063	0.399348	0.265072	0.488866	0.265072	0.270261	0.858843	NA	0.01106	0.00795	0.0131333	0.00518333	0.959638	6.25e-15	NA	NA	0.692659	TRUE	NA	NA	NA
ENST00000452495.1	ENSG00000171853.15	TRAPPC12	protein_coding	protein_coding	34.5857	30.442	37.3482	2.8449	0.449278	0.294886	0.0948063	0.389999	0.314682	0.440211	0.154292	0.0225728	0.471573	NA	0.01106	0.00995	0.0118	0.00185	0.964016	6.25e-15	NA	no	0.316944	NA	no	NA	NA
ENST00000415624.5	ENSG00000171853.15	TRAPPC12	protein_coding	protein_coding	34.5857	30.442	37.3482	2.8449	0.449278	0.294886	0.0948063	3.41189	2.9083	3.74762	0.231786	0.429865	0.364692	NA	0.09856	0.09565	0.1005	0.00485	0.970465	6.25e-15	FALSE	yes	0.99763	TRUE	no	NA	NA
ENST00000441983.5	ENSG00000171853.15	TRAPPC12	protein_coding	protein_coding	34.5857	30.442	37.3482	2.8449	0.449278	0.294886	0.0948063	3.46904	3.16083	3.67452	1.40656	0.170053	0.216616	NA	0.09928	0.1004	0.0985333	-0.00186667	0.993932	6.25e-15	FALSE	no	0.230068	FALSE	no	NA	NA
ENST00000490175.5	ENSG00000089006.16	SNX5	protein_coding	processed_transcript	149.461	156.7	144.636	4.24941	2.56439	-0.115578	0.311753	37.1666	48.0771	29.8929	1.95459	1.97302	-0.685365	2.22e-07	0.24718	0.3074	0.207033	-0.100367	0.0165478	6.59e-15	NA	NA	0.999997	TRUE	NA	0	NA
ENST00000377768.7	ENSG00000089006.16	SNX5	protein_coding	protein_coding	149.461	156.7	144.636	4.24941	2.56439	-0.115578	0.311753	49.4209	43.9606	53.0612	1.97844	1.36162	0.27139	0.00687583	0.33222	0.2804	0.366767	0.0863667	6.59e-15	6.59e-15	FALSE	yes	1	TRUE	no	0	NA
ENST00000475716.5	ENSG00000089006.16	SNX5	protein_coding	processed_transcript	149.461	156.7	144.636	4.24941	2.56439	-0.115578	0.311753	1.70988	2.37809	1.2644	0.293019	0.181716	-0.906035	NA	0.01132	0.01515	0.00876667	-0.00638333	0.303201	6.59e-15	NA	NA	0.112743	FALSE	NA	0	NA
ENST00000483485.5	ENSG00000089006.16	SNX5	protein_coding	processed_transcript	149.461	156.7	144.636	4.24941	2.56439	-0.115578	0.311753	3.03829	3.63458	2.64077	0.0458464	0.00974301	-0.459342	0.0599538	0.02024	0.0232	0.0182667	-0.00493333	0.568445	6.59e-15	NA	NA	0.959673	TRUE	NA	0	NA
ENST00000474883.5	ENSG00000089006.16	SNX5	protein_coding	processed_transcript	149.461	156.7	144.636	4.24941	2.56439	-0.115578	0.311753	5.41993	5.20287	5.56463	0.210721	0.339855	0.0968006	0.930771	0.03634	0.03315	0.0384667	0.00531667	0.73274	6.59e-15	NA	NA	0.0811814	FALSE	NA	0	NA
ENST00000377759.8	ENSG00000089006.16	SNX5	protein_coding	protein_coding	149.461	156.7	144.636	4.24941	2.56439	-0.115578	0.311753	6.01447	7.56952	4.97778	0.850964	1.09335	-0.603709	0.334224	0.0402	0.04845	0.0347	-0.01375	0.846416	6.59e-15	FALSE	yes	1	TRUE	no	1	NA
ENST00000606602.1	ENSG00000089006.16	SNX5	protein_coding	protein_coding	149.461	156.7	144.636	4.24941	2.56439	-0.115578	0.311753	3.13495	2.79338	3.36267	0.988992	0.407757	0.266722	NA	0.0211	0.01765	0.0234	0.00575	0.906025	6.59e-15	FALSE	no	0.21744	FALSE	no	1	NA
ENST00000463050.5	ENSG00000089006.16	SNX5	protein_coding	protein_coding	149.461	156.7	144.636	4.24941	2.56439	-0.115578	0.311753	11.987	12.1708	11.8645	0.650376	1.16034	-0.0367491	0.96883	0.08046	0.07785	0.0822	0.00435	0.959638	6.59e-15	NA	no	0.814542	TRUE	no	0	NA
ENST00000476648.5	ENSG00000089006.16	SNX5	protein_coding	processed_transcript	149.461	156.7	144.636	4.24941	2.56439	-0.115578	0.311753	11.2575	10.6865	11.6382	2.5467	2.5684	0.122971	0.93345	0.07508	0.0678	0.0799333	0.0121333	0.959638	6.59e-15	NA	NA	0.998965	TRUE	NA	0	NA
ENST00000606557.1	ENSG00000089006.16	SNX5	protein_coding	protein_coding	149.461	156.7	144.636	4.24941	2.56439	-0.115578	0.311753	3.21814	3.30036	3.16332	0.0277382	0.216673	-0.0609934	0.969149	0.02156	0.02105	0.0219	0.00085	0.959638	6.59e-15	FALSE	no	0.209853	FALSE	no	2	NA
ENST00000606570.1	ENSG00000089006.16	SNX5	protein_coding	retained_intron	149.461	156.7	144.636	4.24941	2.56439	-0.115578	0.311753	4.6265	4.60908	4.63812	0.673776	0.340649	0.00904379	0.977858	0.03112	0.0296	0.0321333	0.00253333	0.959638	6.59e-15	NA	NA	0.0519463	FALSE	NA	1	NA
ENST00000431277.5	ENSG00000089006.16	SNX5	protein_coding	protein_coding	149.461	156.7	144.636	4.24941	2.56439	-0.115578	0.311753	5.92457	6.37396	5.62499	1.82289	1.1032	-0.180039	0.894152	0.03936	0.0404	0.0386667	-0.00173333	0.985507	6.59e-15	FALSE	yes	0.47806	NA	no	0	NA
ENST00000484809.1	ENSG00000089006.16	SNX5	protein_coding	retained_intron	149.461	156.7	144.636	4.24941	2.56439	-0.115578	0.311753	2.65535	2.79581	2.56171	0.0792016	0.347292	-0.12569	0.904242	0.01774	0.01785	0.0176667	-0.000183333	0.991908	6.59e-15	NA	NA	0.040455	FALSE	NA	0	NA
ENST00000378154.1	ENSG00000147044.20	CASK	protein_coding	protein_coding	22.5671	24.7353	21.1216	0.766706	0.210464	-0.227753	0.0912763	0.720515	0	1.20086	0	0.106258	6.91989	NA	0.03414	0	0.0569	0.0569	9.48e-15	9.48e-15	FALSE	yes	1	TRUE	no	NA	NA
ENST00000378158.5	ENSG00000147044.20	CASK	protein_coding	protein_coding	22.5671	24.7353	21.1216	0.766706	0.210464	-0.227753	0.0912763	3.78037	5.08123	2.91313	0.770744	0.256413	-0.800499	0.00603956	0.16546	0.2066	0.138033	-0.0685667	0.459685	9.48e-15	FALSE	yes	1	TRUE	no	NA	NA
ENST00000378163.5	ENSG00000147044.20	CASK	protein_coding	protein_coding	22.5671	24.7353	21.1216	0.766706	0.210464	-0.227753	0.0912763	2.46078	2.2138	2.62543	0.589848	0.226703	0.245012	0.765163	0.11068	0.09035	0.124233	0.0338833	0.788463	9.48e-15	FALSE	yes	1	TRUE	no	NA	NA
ENST00000378168.6	ENSG00000147044.20	CASK	protein_coding	protein_coding	22.5671	24.7353	21.1216	0.766706	0.210464	-0.227753	0.0912763	4.98021	4.79308	5.10496	1.03109	0.551725	0.0907653	0.917919	0.2224	0.1927	0.2422	0.0495	0.845917	9.48e-15	FALSE	yes	1	TRUE	no	NA	NA
ENST00000468986.6	ENSG00000147044.20	CASK	protein_coding	processed_transcript	22.5671	24.7353	21.1216	0.766706	0.210464	-0.227753	0.0912763	3.06825	4.00727	2.44224	0.112752	0.804074	-0.712115	NA	0.13392	0.16205	0.115167	-0.0468833	0.904508	9.48e-15	NA	NA	0.964132	TRUE	NA	NA	NA
ENST00000421587.6	ENSG00000147044.20	CASK	protein_coding	protein_coding	22.5671	24.7353	21.1216	0.766706	0.210464	-0.227753	0.0912763	3.34065	3.83686	3.00984	0.057663	0.141299	-0.349208	0.0349571	0.1476	0.15535	0.142433	-0.0129167	0.952094	9.48e-15	FALSE	yes	1	TRUE	no	NA	NA
ENST00000469265.1	ENSG00000147044.20	CASK	protein_coding	processed_transcript	22.5671	24.7353	21.1216	0.766706	0.210464	-0.227753	0.0912763	0.29206	0.566378	0.109181	0.566378	0.109181	-2.27386	NA	0.01198	0.0222	0.00516667	-0.0170333	0.959638	9.48e-15	NA	NA	0.166208	FALSE	NA	NA	NA
ENST00000442742.6	ENSG00000147044.20	CASK	protein_coding	protein_coding	22.5671	24.7353	21.1216	0.766706	0.210464	-0.227753	0.0912763	3.63362	3.92298	3.44072	0.517824	0.430982	-0.188727	0.822819	0.16094	0.1581	0.162833	0.00473333	0.97465	9.48e-15	FALSE	yes	1	TRUE	no	NA	NA
ENST00000447319.5	ENSG00000198157.10	HMGN5	protein_coding	protein_coding	5.8139	4.91851	6.41083	0.0566853	0.911744	0.381607	0.539323	0.531994	1.32998	0	0.0769362	0	-7.06607	NA	0.1081	0.27025	0	-0.27025	1.41e-14	1.41e-14	FALSE	yes	0.198909	FALSE	no	0	TRUE
ENST00000373250.7	ENSG00000198157.10	HMGN5	protein_coding	protein_coding	5.8139	4.91851	6.41083	0.0566853	0.911744	0.381607	0.539323	1.79992	0.82778	2.44802	0.736024	0.57348	1.55285	NA	0.2913	0.17	0.372167	0.202167	0.67708	1.41e-14	FALSE	yes	0.115477	FALSE	no	0	TRUE
ENST00000358130.6	ENSG00000198157.10	HMGN5	protein_coding	protein_coding	5.8139	4.91851	6.41083	0.0566853	0.911744	0.381607	0.539323	1.30078	1.01089	1.49404	0.00157516	0.104895	0.559021	0.392755	0.22926	0.20555	0.245067	0.0395167	0.959638	1.41e-14	FALSE	yes	0.999999	TRUE	no	0	TRUE
ENST00000451455.1	ENSG00000198157.10	HMGN5	protein_coding	protein_coding	5.8139	4.91851	6.41083	0.0566853	0.911744	0.381607	0.539323	0.749691	0.697145	0.784722	0.0446598	0.0497338	0.168445	NA	0.1337	0.14185	0.128267	-0.0135833	0.959638	1.41e-14	FALSE	yes	0.0957212	FALSE	no	0	TRUE
ENST00000491275.1	ENSG00000198157.10	HMGN5	protein_coding	processed_transcript	5.8139	4.91851	6.41083	0.0566853	0.911744	0.381607	0.539323	0.382814	0.285462	0.447716	0.285462	0.231719	0.631479	NA	0.0711	0.0574	0.0802333	0.0228333	0.959638	1.41e-14	NA	NA	0.0469768	FALSE	NA	0	TRUE
ENST00000430960.5	ENSG00000198157.10	HMGN5	protein_coding	protein_coding	5.8139	4.91851	6.41083	0.0566853	0.911744	0.381607	0.539323	1.0487	0.767253	1.23633	0.476546	0.617407	0.681226	NA	0.1665	0.1549	0.174233	0.0193333	0.968129	1.41e-14	FALSE	yes	0.0972932	FALSE	no	0	TRUE
ENST00000496120.6	ENSG00000185630.18	PBX1	protein_coding	processed_transcript	71.8481	74.705	69.9435	7.11053	2.13328	-0.095001	0.580261	1.22872	0	2.04787	0	0.297067	7.68501	NA	0.01774	0	0.0295667	0.0295667	2.44e-14	2.44e-14	NA	NA	1	TRUE	NA	NA	NA
ENST00000420696.6	ENSG00000185630.18	PBX1	protein_coding	protein_coding	71.8481	74.705	69.9435	7.11053	2.13328	-0.095001	0.580261	29.5445	33.8234	26.6919	0.159262	0.457863	-0.341509	1.27e-10	0.41204	0.4571	0.382	-0.0751	0.382957	2.44e-14	FALSE	yes	1	TRUE	no	NA	NA
ENST00000612123.3	ENSG00000185630.18	PBX1	protein_coding	protein_coding	71.8481	74.705	69.9435	7.11053	2.13328	-0.095001	0.580261	19.6734	23.8287	16.9033	3.38754	0.793718	-0.495149	0.00587734	0.27534	0.3262	0.241433	-0.0847667	0.666858	2.44e-14	FALSE	yes	0.8786	TRUE	no	NA	NA
ENST00000367897.5	ENSG00000185630.18	PBX1	protein_coding	protein_coding	71.8481	74.705	69.9435	7.11053	2.13328	-0.095001	0.580261	7.32367	5.0632	8.83064	4.62213	1.27684	0.801256	0.84183	0.10028	0.06245	0.1255	0.06305	0.711056	2.44e-14	FALSE	yes	0.999999	TRUE	no	NA	NA
ENST00000540236.3	ENSG00000185630.18	PBX1	protein_coding	protein_coding	71.8481	74.705	69.9435	7.11053	2.13328	-0.095001	0.580261	7.26706	4.77104	8.93107	4.74097	0.646076	0.903122	0.883364	0.10012	0.05835	0.127967	0.0696167	0.7554	2.44e-14	FALSE	yes	0.999019	TRUE	no	NA	NA
ENST00000485769.5	ENSG00000185630.18	PBX1	protein_coding	protein_coding	71.8481	74.705	69.9435	7.11053	2.13328	-0.095001	0.580261	3.75763	4.0976	3.53099	0.408625	0.208908	-0.214145	0.848709	0.05222	0.05485	0.0504667	-0.00438333	0.949333	2.44e-14	FALSE	no	0.121181	FALSE	no	NA	NA
ENST00000468104.5	ENSG00000185630.18	PBX1	protein_coding	processed_transcript	71.8481	74.705	69.9435	7.11053	2.13328	-0.095001	0.580261	0.937971	0.972497	0.914954	0.240717	0.316752	-0.0870718	NA	0.013	0.0128	0.0131333	0.000333333	0.981713	2.44e-14	NA	NA	0.999854	TRUE	NA	NA	NA
ENST00000467532.5	ENSG00000161249.20	DMKN	protein_coding	nonsense_mediated_decay	60.0338	54.035	64.033	1.52015	3.64789	0.24488	0.258663	1.64698	0	2.74497	0	0.633722	8.10589	NA	0.0255	0	0.0425	0.0425	3.03e-14	3.03e-14	TRUE	no	0.621024	TRUE	no	NA	NA
ENST00000472365.6	ENSG00000161249.20	DMKN	protein_coding	retained_intron	60.0338	54.035	64.033	1.52015	3.64789	0.24488	0.258663	0.750257	0.412963	0.975119	0.178476	0.108069	1.21977	NA	0.01218	0.00755	0.0152667	0.00771667	0.247078	3.03e-14	NA	NA	0.354994	NA	NA	NA	NA
ENST00000461300.5	ENSG00000161249.20	DMKN	protein_coding	protein_coding	60.0338	54.035	64.033	1.52015	3.64789	0.24488	0.258663	7.21987	8.89938	6.1002	0.408725	1.00309	-0.544105	0.49135	0.1238	0.165	0.0963333	-0.0686667	0.47096	3.03e-14	FALSE	no	0.0156787	FALSE	no	NA	NA
ENST00000472252.6	ENSG00000161249.20	DMKN	protein_coding	protein_coding	60.0338	54.035	64.033	1.52015	3.64789	0.24488	0.258663	0.690979	0.200488	1.01797	0.200488	0.13621	2.28799	NA	0.01116	0.0036	0.0162	0.0126	0.478996	3.03e-14	FALSE	no	0.670797	TRUE	no	NA	NA
ENST00000436012.5	ENSG00000161249.20	DMKN	protein_coding	protein_coding	60.0338	54.035	64.033	1.52015	3.64789	0.24488	0.258663	4.42542	5.60352	3.64002	0.370793	0.766995	-0.621003	0.505166	0.07596	0.104	0.0572667	-0.0467333	0.524338	3.03e-14	FALSE	no	0.858551	TRUE	no	NA	NA
ENST00000471017.5	ENSG00000161249.20	DMKN	protein_coding	retained_intron	60.0338	54.035	64.033	1.52015	3.64789	0.24488	0.258663	0.702213	1.26227	0.328844	0.161197	0.167207	-1.90871	NA	0.01226	0.0233	0.0049	-0.0184	0.5769	3.03e-14	NA	NA	0.106647	FALSE	NA	NA	NA
ENST00000463292.5	ENSG00000161249.20	DMKN	protein_coding	nonsense_mediated_decay	60.0338	54.035	64.033	1.52015	3.64789	0.24488	0.258663	2.45266	3.1316	2.00002	0.858102	0.371356	-0.644289	NA	0.04188	0.05755	0.0314333	-0.0261167	0.598723	3.03e-14	TRUE	no	0.154575	FALSE	no	NA	NA
ENST00000476051.5	ENSG00000161249.20	DMKN	protein_coding	processed_transcript	60.0338	54.035	64.033	1.52015	3.64789	0.24488	0.258663	0.863671	1.03661	0.748379	0.547245	0.748379	-0.46473	NA	0.01544	0.0189	0.0131333	-0.00576667	0.743787	3.03e-14	NA	NA	0.0104131	FALSE	NA	NA	NA
ENST00000462721.5	ENSG00000161249.20	DMKN	protein_coding	nonsense_mediated_decay	60.0338	54.035	64.033	1.52015	3.64789	0.24488	0.258663	1.67186	0.980838	2.13254	0.629984	0.492222	1.1126	NA	0.02746	0.0185	0.0334333	0.0149333	0.795377	3.03e-14	TRUE	no	0.901162	TRUE	no	NA	NA
ENST00000602781.5	ENSG00000161249.20	DMKN	protein_coding	protein_coding	60.0338	54.035	64.033	1.52015	3.64789	0.24488	0.258663	0.673436	1.06822	0.410248	0.395343	0.205228	-1.35934	NA	0.01176	0.01955	0.00656667	-0.0129833	0.813428	3.03e-14	FALSE	no	0.907584	TRUE	no	NA	NA
ENST00000474928.5	ENSG00000161249.20	DMKN	protein_coding	protein_coding	60.0338	54.035	64.033	1.52015	3.64789	0.24488	0.258663	11.4278	8.71681	13.2351	0.336421	2.94896	0.601935	0.492056	0.18636	0.1616	0.202867	0.0412667	0.871074	3.03e-14	FALSE	no	0.0306939	FALSE	no	NA	NA
ENST00000466587.6	ENSG00000161249.20	DMKN	protein_coding	processed_transcript	60.0338	54.035	64.033	1.52015	3.64789	0.24488	0.258663	0.802728	0.163121	1.22913	0.163121	0.764148	2.83948	NA	0.01292	0.0031	0.0194667	0.0163667	0.939074	3.03e-14	NA	NA	0.0175354	FALSE	NA	NA	NA
ENST00000408915.6	ENSG00000161249.20	DMKN	protein_coding	protein_coding	60.0338	54.035	64.033	1.52015	3.64789	0.24488	0.258663	0.842023	0.716744	0.925543	0.716744	0.483517	0.364358	NA	0.0142	0.0129	0.0150667	0.00216667	0.959638	3.03e-14	FALSE	no	0.167606	FALSE	yes	NA	NA
ENST00000414866.6	ENSG00000161249.20	DMKN	protein_coding	protein_coding	60.0338	54.035	64.033	1.52015	3.64789	0.24488	0.258663	0.773328	0.235573	1.13183	0.235573	0.825818	2.21713	NA	0.0119	0.00425	0.017	0.01275	0.959638	3.03e-14	FALSE	no	0.963742	TRUE	no	NA	NA
ENST00000462538.5	ENSG00000161249.20	DMKN	protein_coding	nonsense_mediated_decay	60.0338	54.035	64.033	1.52015	3.64789	0.24488	0.258663	1.00883	0.833157	1.12594	0.0991112	0.243228	0.430014	NA	0.01654	0.0154	0.0173	0.0019	0.959638	3.03e-14	TRUE	no	0.0761686	FALSE	no	NA	NA
ENST00000470857.1	ENSG00000161249.20	DMKN	protein_coding	retained_intron	60.0338	54.035	64.033	1.52015	3.64789	0.24488	0.258663	0.79626	0.915974	0.716451	0.467391	0.100285	-0.350107	NA	0.01332	0.0167	0.0110667	-0.00563333	0.959638	3.03e-14	NA	NA	0.0180419	FALSE	NA	NA	NA
ENST00000480507.1	ENSG00000161249.20	DMKN	protein_coding	nonsense_mediated_decay	60.0338	54.035	64.033	1.52015	3.64789	0.24488	0.258663	7.14911	7.08144	7.19423	1.18868	0.265293	0.0227669	NA	0.12004	0.13055	0.113033	-0.0175167	0.959638	3.03e-14	TRUE	no	0.0224669	FALSE	no	NA	NA
ENST00000488542.6	ENSG00000161249.20	DMKN	protein_coding	retained_intron	60.0338	54.035	64.033	1.52015	3.64789	0.24488	0.258663	1.82423	1.85516	1.80361	0.580771	0.264386	-0.0404304	NA	0.03048	0.03405	0.0281	-0.00595	0.959638	3.03e-14	NA	NA	0.282413	NA	NA	NA	NA
ENST00000392206.6	ENSG00000161249.20	DMKN	protein_coding	protein_coding	60.0338	54.035	64.033	1.52015	3.64789	0.24488	0.258663	3.98947	3.89357	4.0534	1.38748	1.02231	0.0578907	NA	0.0685	0.07285	0.0656	-0.00725	0.977115	3.03e-14	FALSE	no	0.362508	NA	no	NA	NA
ENST00000488892.5	ENSG00000161249.20	DMKN	protein_coding	protein_coding	60.0338	54.035	64.033	1.52015	3.64789	0.24488	0.258663	1.98864	0.886351	2.72351	0.214717	1.64355	1.60862	NA	0.0306	0.01655	0.0399667	0.0234167	0.978012	3.03e-14	FALSE	no	0.143494	FALSE	no	NA	NA
ENST00000489395.6	ENSG00000161249.20	DMKN	protein_coding	retained_intron	60.0338	54.035	64.033	1.52015	3.64789	0.24488	0.258663	0.756447	0.701047	0.793381	0.181099	0.0732872	0.176138	NA	0.01258	0.0129	0.0123667	-0.000533333	0.983307	3.03e-14	NA	NA	0.161744	FALSE	NA	NA	NA
ENST00000397572.4	ENSG00000214114.8	MYCBP	protein_coding	protein_coding	53.4885	67.5674	44.1026	1.64701	0.709937	-0.61535	2.31e-10	22.5918	24.1826	21.5314	0.815743	0.417848	-0.167456	0.191814	0.43606	0.35785	0.4882	0.13035	4.46e-14	4.46e-14	FALSE	no	0.635964	TRUE	no	0	NA
ENST00000465771.3	ENSG00000214114.8	MYCBP	protein_coding	processed_transcript	53.4885	67.5674	44.1026	1.64701	0.709937	-0.61535	2.31e-10	13.872	20.4207	9.5062	3.64989	1.66531	-1.10228	NA	0.24928	0.3011	0.214733	-0.0863667	0.703495	4.46e-14	NA	NA	0.229153	FALSE	NA	0	NA
ENST00000494695.4	ENSG00000214114.8	MYCBP	protein_coding	protein_coding	53.4885	67.5674	44.1026	1.64701	0.709937	-0.61535	2.31e-10	12.5903	17.618	9.23842	2.63125	1.00616	-0.930591	0.0134813	0.2305	0.26185	0.2096	-0.05225	0.850212	4.46e-14	FALSE	no	0.0583229	FALSE	no	0	NA
ENST00000495043.5	ENSG00000214114.8	MYCBP	protein_coding	processed_transcript	53.4885	67.5674	44.1026	1.64701	0.709937	-0.61535	2.31e-10	4.4344	5.34608	3.82662	0.187376	0.92761	-0.481344	0.661212	0.08416	0.0792	0.0874667	0.00826667	0.976846	4.46e-14	NA	NA	0.0134779	FALSE	NA	0	NA
ENST00000455875.5	ENSG00000177917.10	ARL6IP6	protein_coding	nonsense_mediated_decay	14.0681	14.4499	13.8135	0.485909	0.934583	-0.0649317	0.871935	1.06904	0	1.78173	0	0.163471	7.48521	NA	0.07878	0	0.1313	0.1313	6.66e-14	6.66e-14	TRUE	no	0.0591853	FALSE	no	0	TRUE
ENST00000495469.5	ENSG00000177917.10	ARL6IP6	protein_coding	processed_transcript	14.0681	14.4499	13.8135	0.485909	0.934583	-0.0649317	0.871935	7.3162	9.06378	6.15114	0.723493	1.12536	-0.558507	0.37482	0.51354	0.6263	0.438367	-0.187933	0.253816	6.66e-14	NA	NA	0.0270505	FALSE	NA	0	TRUE
ENST00000326446.9	ENSG00000177917.10	ARL6IP6	protein_coding	protein_coding	14.0681	14.4499	13.8135	0.485909	0.934583	-0.0649317	0.871935	5.32282	4.87756	5.61966	0.0043145	0.0761624	0.203934	0.417411	0.38196	0.33795	0.4113	0.07335	0.675429	6.66e-14	FALSE	yes	0.99636	TRUE	no	1	TRUE
ENST00000463690.1	ENSG00000177917.10	ARL6IP6	protein_coding	processed_transcript	14.0681	14.4499	13.8135	0.485909	0.934583	-0.0649317	0.871935	0.360002	0.508536	0.260979	0.233269	0.13354	-0.936265	NA	0.0257	0.03575	0.019	-0.01675	0.952458	6.66e-14	NA	NA	0.589921	TRUE	NA	0	TRUE
ENST00000558983.5	ENSG00000068305.17	MEF2A	protein_coding	retained_intron	17.613	17.7728	17.5064	0.139928	0.701504	-0.0217784	0.955735	2.1001	3.2583	1.32796	0.220164	0.196261	-1.2885	NA	0.11884	0.18345	0.0757667	-0.107683	0.000274389	7.42e-14	NA	NA	0.825126	TRUE	NA	1	NA
ENST00000559036.5	ENSG00000068305.17	MEF2A	protein_coding	retained_intron	17.613	17.7728	17.5064	0.139928	0.701504	-0.0217784	0.955735	1.86148	1.06246	2.39416	0.120168	0.368417	1.16461	NA	0.10578	0.0597	0.1365	0.0768	0.0413054	7.42e-14	NA	NA	0.279588	NA	NA	0	NA
ENST00000557785.5	ENSG00000068305.17	MEF2A	protein_coding	protein_coding	17.613	17.7728	17.5064	0.139928	0.701504	-0.0217784	0.955735	0.874644	0.00509754	1.45434	0.00509754	0.118555	6.5998	NA	0.05046	0.0003	0.0839	0.0836	7.42e-14	7.42e-14	FALSE	yes	1	TRUE	no	0	NA
ENST00000354410.9	ENSG00000068305.17	MEF2A	protein_coding	protein_coding	17.613	17.7728	17.5064	0.139928	0.701504	-0.0217784	0.955735	2.37387	2.62284	2.20789	0.0536758	0.177868	-0.24743	0.486058	0.13448	0.1476	0.125733	-0.0218667	0.837832	7.42e-14	FALSE	yes	0.999999	TRUE	no	1	NA
ENST00000557942.5	ENSG00000068305.17	MEF2A	protein_coding	protein_coding	17.613	17.7728	17.5064	0.139928	0.701504	-0.0217784	0.955735	0.274668	0.68667	0	0.68667	0	-6.1224	NA	0.01558	0.03895	0	-0.03895	0.937651	7.42e-14	FALSE	yes	1	TRUE	no	1	NA
ENST00000338042.10	ENSG00000068305.17	MEF2A	protein_coding	protein_coding	17.613	17.7728	17.5064	0.139928	0.701504	-0.0217784	0.955735	7.92575	8.13522	7.78611	0.897616	0.243518	-0.0631997	0.875438	0.45002	0.4574	0.4451	-0.0123	0.959638	7.42e-14	FALSE	yes	1	TRUE	no	1	NA
ENST00000560493.5	ENSG00000068305.17	MEF2A	protein_coding	protein_coding	17.613	17.7728	17.5064	0.139928	0.701504	-0.0217784	0.955735	0.439121	0.384597	0.475471	0.0537918	0.130803	0.299007	NA	0.02466	0.02165	0.0266667	0.00501667	0.959638	7.42e-14	FALSE	yes	0.0990829	FALSE	no	0	NA
ENST00000561125.2	ENSG00000068305.17	MEF2A	protein_coding	retained_intron	17.613	17.7728	17.5064	0.139928	0.701504	-0.0217784	0.955735	0.562534	0.449328	0.638004	0.0619154	0.213967	0.496477	NA	0.03236	0.0253	0.0370667	0.0117667	0.959638	7.42e-14	NA	NA	0.994751	TRUE	NA	0	NA
ENST00000558049.5	ENSG00000068305.17	MEF2A	protein_coding	protein_coding	17.613	17.7728	17.5064	0.139928	0.701504	-0.0217784	0.955735	0.650739	0.646425	0.653614	0.065306	0.304269	0.0157134	NA	0.03638	0.0364	0.0363667	-3.33e-05	0.961362	7.42e-14	FALSE	yes	0.13441	FALSE	no	0	NA
ENST00000449277.6	ENSG00000068305.17	MEF2A	protein_coding	protein_coding	17.613	17.7728	17.5064	0.139928	0.701504	-0.0217784	0.955735	0.550062	0.521889	0.568845	0.150986	0.112578	0.122053	0.94354	0.03144	0.0293	0.0328667	0.00356667	0.96256	7.42e-14	FALSE	yes	0.99999	TRUE	no	1	NA
ENST00000448708.5	ENSG00000082438.15	COBLL1	protein_coding	protein_coding	12.1799	14.3836	10.7108	0.419641	0.456505	-0.425021	0.00312662	0.700037	1.75009	0	0.146191	0	-7.45951	NA	0.0486	0.1215	0	-0.1215	8.42e-14	8.42e-14	FALSE	yes	0.174739	FALSE	no	0	NA
ENST00000496396.1	ENSG00000082438.15	COBLL1	protein_coding	retained_intron	12.1799	14.3836	10.7108	0.419641	0.456505	-0.425021	0.00312662	0.127431	0.0458778	0.181799	0.0458778	0.0337909	1.77925	NA	0.01142	0.0031	0.0169667	0.0138667	0.49524	8.42e-14	NA	NA	0.632943	TRUE	NA	1	NA
ENST00000493921.1	ENSG00000082438.15	COBLL1	protein_coding	processed_transcript	12.1799	14.3836	10.7108	0.419641	0.456505	-0.425021	0.00312662	0.1612	0	0.268667	0	0.167989	4.80047	NA	0.01434	0	0.0239	0.0239	0.605144	8.42e-14	NA	NA	0.0660218	FALSE	NA	0	NA
ENST00000342193.8	ENSG00000082438.15	COBLL1	protein_coding	protein_coding	12.1799	14.3836	10.7108	0.419641	0.456505	-0.425021	0.00312662	1.26376	1.2198	1.29306	0.197314	0.221774	0.0834811	0.953586	0.10602	0.08445	0.1204	0.03595	0.831897	8.42e-14	FALSE	yes	1	TRUE	no	0	NA
ENST00000495084.1	ENSG00000082438.15	COBLL1	protein_coding	processed_transcript	12.1799	14.3836	10.7108	0.419641	0.456505	-0.425021	0.00312662	0.548614	0.462317	0.606146	0.319586	0.192151	0.383517	NA	0.04758	0.0328	0.0574333	0.0246333	0.925431	8.42e-14	NA	NA	0.0144873	FALSE	NA	0	NA
ENST00000474975.1	ENSG00000082438.15	COBLL1	protein_coding	retained_intron	12.1799	14.3836	10.7108	0.419641	0.456505	-0.425021	0.00312662	0.331629	0.338292	0.327188	0.0426347	0.0471538	-0.0467447	NA	0.02778	0.02365	0.0305333	0.00688333	0.950075	8.42e-14	NA	NA	0.923742	TRUE	NA	0	NA
ENST00000409184.7	ENSG00000082438.15	COBLL1	protein_coding	protein_coding	12.1799	14.3836	10.7108	0.419641	0.456505	-0.425021	0.00312662	7.08688	8.08007	6.42475	0.351264	0.158663	-0.330267	0.019506	0.58654	0.56155	0.6032	0.04165	0.950232	8.42e-14	NA	no	1	TRUE	no	0	NA
ENST00000444537.5	ENSG00000082438.15	COBLL1	protein_coding	protein_coding	12.1799	14.3836	10.7108	0.419641	0.456505	-0.425021	0.00312662	0.500035	0.742937	0.338101	0.00889169	0.1753	-1.11302	NA	0.03882	0.0517	0.0302333	-0.0214667	0.952055	8.42e-14	FALSE	no	0.178372	FALSE	no	0	NA
ENST00000375458.6	ENSG00000082438.15	COBLL1	protein_coding	protein_coding	12.1799	14.3836	10.7108	0.419641	0.456505	-0.425021	0.00312662	0.212992	0.240585	0.194596	0.240585	0.105446	-0.292525	NA	0.01776	0.01725	0.0181	0.00085	0.959698	8.42e-14	FALSE	yes	1	TRUE	no	0	NA
ENST00000452626.5	ENSG00000082438.15	COBLL1	protein_coding	protein_coding	12.1799	14.3836	10.7108	0.419641	0.456505	-0.425021	0.00312662	0.652133	0.597328	0.68867	0.106133	0.281284	0.202137	NA	0.05416	0.04135	0.0627	0.02135	0.960674	8.42e-14	NA	no	0.262141	NA	no	0	NA
ENST00000629362.2	ENSG00000082438.15	COBLL1	protein_coding	protein_coding	12.1799	14.3836	10.7108	0.419641	0.456505	-0.425021	0.00312662	0.174405	0.25061	0.123601	0.25061	0.0726934	-0.963958	NA	0.01448	0.01795	0.0121667	-0.00578333	0.984894	8.42e-14	FALSE	yes	1	TRUE	no	0	NA
ENST00000392717.6	ENSG00000082438.15	COBLL1	protein_coding	protein_coding	12.1799	14.3836	10.7108	0.419641	0.456505	-0.425021	0.00312662	0.228265	0.35173	0.145954	0.35173	0.10821	-1.21379	NA	0.0177	0.02375	0.0136667	-0.0100833	0.995801	8.42e-14	FALSE	yes	1	TRUE	no	0	NA
ENST00000568172.1	ENSG00000087263.16	OGFOD1	protein_coding	processed_transcript	56.0548	56.4092	55.8184	2.50811	1.553	-0.0151872	0.972457	15.4891	18.7895	13.2888	1.4273	1.02924	-0.499397	0.266374	0.27598	0.3326	0.238233	-0.0943667	0.0345757	9.96e-14	NA	NA	0.648419	TRUE	NA	NA	NA
ENST00000565682.5	ENSG00000087263.16	OGFOD1	protein_coding	nonsense_mediated_decay	56.0548	56.4092	55.8184	2.50811	1.553	-0.0151872	0.972457	1.66674	0	2.7779	0	0.532866	8.12304	NA	0.03008	0	0.0501333	0.0501333	9.96e-14	9.96e-14	TRUE	no	0.708164	TRUE	no	NA	NA
ENST00000568397.1	ENSG00000087263.16	OGFOD1	protein_coding	protein_coding	56.0548	56.4092	55.8184	2.50811	1.553	-0.0151872	0.972457	6.93726	5.61152	7.82108	0.719621	0.538469	0.478251	0.177469	0.12382	0.09915	0.140267	0.0411167	0.143331	9.96e-14	FALSE	yes	1	TRUE	no	NA	NA
ENST00000336111.9	ENSG00000087263.16	OGFOD1	protein_coding	nonsense_mediated_decay	56.0548	56.4092	55.8184	2.50811	1.553	-0.0151872	0.972457	24.5951	25.6781	23.873	0.14601	0.74058	-0.105117	0.536802	0.43964	0.456	0.428733	-0.0272667	0.938716	9.96e-14	TRUE	no	1	TRUE	no	NA	NA
ENST00000561646.5	ENSG00000087263.16	OGFOD1	protein_coding	protein_coding	56.0548	56.4092	55.8184	2.50811	1.553	-0.0151872	0.972457	1.03424	0	1.72374	0	1.72374	7.43774	NA	0.0176	0	0.0293333	0.0293333	0.959638	9.96e-14	FALSE	yes	0.207835	FALSE	no	NA	NA
ENST00000566157.5	ENSG00000087263.16	OGFOD1	protein_coding	protein_coding	56.0548	56.4092	55.8184	2.50811	1.553	-0.0151872	0.972457	5.75346	5.80045	5.72213	0.347183	0.274832	-0.0195791	0.966869	0.10258	0.10275	0.102467	-0.000283333	0.99564	9.96e-14	FALSE	yes	1	TRUE	no	NA	NA
ENST00000559454.5	ENSG00000156958.14	GALK2	protein_coding	protein_coding	23.6019	23.9508	23.3692	2.69912	0.172295	-0.0354498	0.934576	0.883285	0	1.47214	0	0.217839	7.21154	NA	0.03776	0	0.0629333	0.0629333	1.11e-13	1.11e-13	FALSE	yes	1	TRUE	no	NA	NA
ENST00000327171.7	ENSG00000156958.14	GALK2	protein_coding	protein_coding	23.6019	23.9508	23.3692	2.69912	0.172295	-0.0354498	0.934576	0.511342	0.632242	0.430742	0.0508279	0.0413808	-0.543182	0.45575	0.02168	0.0265	0.0184667	-0.00803333	0.827238	1.11e-13	FALSE	yes	1	TRUE	no	NA	NA
ENST00000559963.5	ENSG00000156958.14	GALK2	protein_coding	nonsense_mediated_decay	23.6019	23.9508	23.3692	2.69912	0.172295	-0.0354498	0.934576	1.21983	1.49598	1.03573	0.017698	0.296045	-0.526196	NA	0.0519	0.06335	0.0442667	-0.0190833	0.835755	1.11e-13	TRUE	no	0.164615	FALSE	no	NA	NA
ENST00000396509.6	ENSG00000156958.14	GALK2	protein_coding	protein_coding	23.6019	23.9508	23.3692	2.69912	0.172295	-0.0354498	0.934576	7.73221	8.13998	7.46036	0.862275	0.16939	-0.125618	0.78026	0.32764	0.34015	0.3193	-0.02085	0.886681	1.11e-13	FALSE	yes	1	TRUE	no	NA	NA
ENST00000559040.1	ENSG00000156958.14	GALK2	protein_coding	processed_transcript	23.6019	23.9508	23.3692	2.69912	0.172295	-0.0354498	0.934576	1.47868	1.22963	1.64472	0.434416	0.273408	0.416673	NA	0.06396	0.05405	0.0705667	0.0165167	0.928199	1.11e-13	NA	NA	0.429549	NA	NA	NA	NA
ENST00000559208.5	ENSG00000156958.14	GALK2	protein_coding	nonsense_mediated_decay	23.6019	23.9508	23.3692	2.69912	0.172295	-0.0354498	0.934576	0.305646	0.284011	0.320069	0.113597	0.0834122	0.166895	NA	0.01278	0.01145	0.0136667	0.00221667	0.959638	1.11e-13	TRUE	yes	0.196066	FALSE	no	NA	NA
ENST00000559883.5	ENSG00000156958.14	GALK2	protein_coding	nonsense_mediated_decay	23.6019	23.9508	23.3692	2.69912	0.172295	-0.0354498	0.934576	0.272979	0.332768	0.23312	0.0982809	0.119054	-0.495561	NA	0.01176	0.01455	0.0099	-0.00465	0.959638	1.11e-13	TRUE	no	0.120551	FALSE	no	NA	NA
ENST00000560119.5	ENSG00000156958.14	GALK2	protein_coding	nonsense_mediated_decay	23.6019	23.9508	23.3692	2.69912	0.172295	-0.0354498	0.934576	0.702522	0.856425	0.59992	0.336476	0.274091	-0.506455	NA	0.0306	0.0378	0.0258	-0.012	0.959638	1.11e-13	TRUE	yes	0.997912	TRUE	no	NA	NA
ENST00000560138.5	ENSG00000156958.14	GALK2	protein_coding	protein_coding	23.6019	23.9508	23.3692	2.69912	0.172295	-0.0354498	0.934576	1.6252	1.81527	1.49848	0.682519	0.200853	-0.275014	NA	0.06784	0.0735	0.0640667	-0.00943333	0.959638	1.11e-13	FALSE	yes	0.259237	NA	no	NA	NA
ENST00000560528.1	ENSG00000156958.14	GALK2	protein_coding	protein_coding	23.6019	23.9508	23.3692	2.69912	0.172295	-0.0354498	0.934576	0.305161	0.31739	0.297008	0.123683	0.219112	-0.0927331	NA	0.0132	0.01405	0.0126333	-0.00141667	0.959638	1.11e-13	NA	no	0.247551	FALSE	no	NA	NA
ENST00000561014.1	ENSG00000156958.14	GALK2	protein_coding	processed_transcript	23.6019	23.9508	23.3692	2.69912	0.172295	-0.0354498	0.934576	0.357498	0.308987	0.389838	0.078426	0.0570052	0.325918	NA	0.01506	0.01265	0.0166667	0.00401667	0.959638	1.11e-13	NA	NA	0.999785	TRUE	NA	NA	NA
ENST00000560031.5	ENSG00000156958.14	GALK2	protein_coding	protein_coding	23.6019	23.9508	23.3692	2.69912	0.172295	-0.0354498	0.934576	7.24164	7.49543	7.07245	1.14999	0.500829	-0.0836859	0.903663	0.30624	0.3115	0.302733	-0.00876667	0.968847	1.11e-13	FALSE	yes	1	TRUE	no	NA	NA
ENST00000493922.5	ENSG00000106443.15	PHF14	protein_coding	processed_transcript	31.0489	35.3733	28.166	0.217747	0.728168	-0.3286	0.00254278	0.709208	1.77302	0	0.131613	0	-7.47818	NA	0.02006	0.05015	0	-0.05015	1.54e-13	1.54e-13	NA	NA	0.0716391	FALSE	NA	NA	NA
ENST00000490957.5	ENSG00000106443.15	PHF14	protein_coding	retained_intron	31.0489	35.3733	28.166	0.217747	0.728168	-0.3286	0.00254278	0.46377	0.257414	0.601341	0.0433175	0.0760393	1.1929	NA	0.0158	0.0073	0.0214667	0.0141667	0.134381	1.54e-13	NA	NA	1	TRUE	NA	NA	NA
ENST00000470665.5	ENSG00000106443.15	PHF14	protein_coding	retained_intron	31.0489	35.3733	28.166	0.217747	0.728168	-0.3286	0.00254278	1.22062	1.95212	0.732949	0.127679	0.171499	-1.40108	NA	0.03752	0.05515	0.0257667	-0.0293833	0.138816	1.54e-13	NA	NA	0.0189253	FALSE	NA	NA	NA
ENST00000423760.6	ENSG00000106443.15	PHF14	protein_coding	nonsense_mediated_decay	31.0489	35.3733	28.166	0.217747	0.728168	-0.3286	0.00254278	4.20086	4.07738	4.28318	0.408454	0.510959	0.07087	0.929498	0.13694	0.1152	0.151433	0.0362333	0.690266	1.54e-13	TRUE	no	1	TRUE	no	NA	NA
ENST00000497851.1	ENSG00000106443.15	PHF14	protein_coding	retained_intron	31.0489	35.3733	28.166	0.217747	0.728168	-0.3286	0.00254278	0.54361	0.857706	0.334212	0.184831	0.207643	-1.33391	NA	0.01688	0.0243	0.0119333	-0.0123667	0.909712	1.54e-13	NA	NA	0.891573	TRUE	NA	NA	NA
ENST00000403050.7	ENSG00000106443.15	PHF14	protein_coding	protein_coding	31.0489	35.3733	28.166	0.217747	0.728168	-0.3286	0.00254278	2.47673	2.43892	2.50193	0.313751	0.459074	0.0366507	0.972721	0.0805	0.0689	0.0882333	0.0193333	0.937563	1.54e-13	FALSE	yes	1	TRUE	no	NA	NA
ENST00000481418.5	ENSG00000106443.15	PHF14	protein_coding	processed_transcript	31.0489	35.3733	28.166	0.217747	0.728168	-0.3286	0.00254278	1.43085	1.30336	1.51584	0.681464	0.668244	0.216339	NA	0.04646	0.037	0.0527667	0.0157667	0.959638	1.54e-13	NA	NA	0.616844	TRUE	NA	NA	NA
ENST00000489305.1	ENSG00000106443.15	PHF14	protein_coding	retained_intron	31.0489	35.3733	28.166	0.217747	0.728168	-0.3286	0.00254278	0.453315	0.618571	0.343144	0.22762	0.152891	-0.831818	NA	0.0142	0.01745	0.0120333	-0.00541667	0.959638	1.54e-13	NA	NA	0.0834203	FALSE	NA	NA	NA
ENST00000634607.1	ENSG00000106443.15	PHF14	protein_coding	protein_coding	31.0489	35.3733	28.166	0.217747	0.728168	-0.3286	0.00254278	19.3567	21.681	17.8073	0.258847	0.877956	-0.283818	0.0290929	0.62594	0.6129	0.634633	0.0217333	0.964874	1.54e-13	FALSE	yes	1	TRUE	no	NA	NA
ENST00000583216.5	ENSG00000133313.14	CNDP2	protein_coding	protein_coding	82.9072	84.317	81.9673	5.71576	1.31949	-0.0407687	0.876171	1.60986	4.02465	0	1.04769	0	-8.6563	NA	0.01952	0.0488	0	-0.0488	2.26e-13	2.26e-13	FALSE	yes	0.122763	FALSE	no	NA	NA
ENST00000579624.1	ENSG00000133313.14	CNDP2	protein_coding	protein_coding	82.9072	84.317	81.9673	5.71576	1.31949	-0.0407687	0.876171	6.69554	9.01349	5.15024	0.753395	0.509935	-0.806248	0.0227633	0.08034	0.1068	0.0627	-0.0441	0.0048686	2.26e-13	FALSE	no	0.0311624	FALSE	no	NA	NA
ENST00000579847.5	ENSG00000133313.14	CNDP2	protein_coding	protein_coding	82.9072	84.317	81.9673	5.71576	1.31949	-0.0407687	0.876171	41.0799	38.6432	42.7045	3.16686	1.59793	0.144138	0.493046	0.49554	0.45785	0.520667	0.0628167	0.00136782	2.26e-13	FALSE	yes	1	TRUE	no	NA	NA
ENST00000583399.5	ENSG00000133313.14	CNDP2	protein_coding	retained_intron	82.9072	84.317	81.9673	5.71576	1.31949	-0.0407687	0.876171	24.9144	23.9892	25.5312	1.85534	0.407183	0.0898424	0.872777	0.3007	0.28435	0.3116	0.02725	0.238483	2.26e-13	NA	NA	0.0783704	FALSE	NA	NA	NA
ENST00000324301.12	ENSG00000133313.14	CNDP2	protein_coding	protein_coding	82.9072	84.317	81.9673	5.71576	1.31949	-0.0407687	0.876171	1.21659	1.83715	0.802883	0.318088	0.299778	-1.18418	0.294727	0.01474	0.02215	0.0098	-0.01235	0.652277	2.26e-13	FALSE	yes	1	TRUE	no	NA	NA
ENST00000580229.1	ENSG00000133313.14	CNDP2	protein_coding	processed_transcript	82.9072	84.317	81.9673	5.71576	1.31949	-0.0407687	0.876171	0.902613	1.37985	0.584455	0.00351491	0.298158	-1.22529	NA	0.01094	0.01645	0.00726667	-0.00918333	0.912576	2.26e-13	NA	NA	0.0133836	FALSE	NA	NA	NA
ENST00000577409.1	ENSG00000133313.14	CNDP2	protein_coding	retained_intron	82.9072	84.317	81.9673	5.71576	1.31949	-0.0407687	0.876171	0.909459	0.80784	0.977206	0.104379	0.154802	0.271533	NA	0.011	0.0097	0.0118667	0.00216667	0.923691	2.26e-13	NA	NA	0.126232	FALSE	NA	NA	NA
ENST00000577355.2	ENSG00000133313.14	CNDP2	protein_coding	protein_coding	82.9072	84.317	81.9673	5.71576	1.31949	-0.0407687	0.876171	1.17175	1.39378	1.02373	0.149978	0.485633	-0.441458	NA	0.01422	0.0167	0.0125667	-0.00413333	0.955069	2.26e-13	FALSE	yes	0.912021	TRUE	no	NA	NA
ENST00000487806.5	ENSG00000174021.10	GNG5	protein_coding	processed_transcript	101.034	98.8588	102.485	3.32643	3.51917	0.0519634	0.798669	3.48149	8.70372	0	4.20769	0	-9.76714	NA	0.03584	0.0896	0	-0.0896	2.42e-10	2.58e-13	NA	NA	0.00911612	FALSE	NA	NA	NA
ENST00000370645.8	ENSG00000174021.10	GNG5	protein_coding	protein_coding	101.034	98.8588	102.485	3.32643	3.51917	0.0519634	0.798669	97.0966	90.1551	101.724	7.53412	3.25139	0.174166	0.404522	0.9598	0.9104	0.992733	0.0823333	2.58e-13	2.58e-13	FALSE	yes	0.0808065	FALSE	no	NA	NA
ENST00000260641.9	ENSG00000138071.13	ACTR2	protein_coding	protein_coding	132.157	137.368	128.682	1.55967	3.24267	-0.0942264	0.419847	129.137	137.368	123.65	1.55967	1.90483	-0.151774	0.00342833	0.97686	1	0.961433	-0.0385667	3.24e-13	3.24e-13	FALSE	yes	1	TRUE	no	NA	NA
ENST00000542850.2	ENSG00000138071.13	ACTR2	protein_coding	protein_coding	132.157	137.368	128.682	1.55967	3.24267	-0.0942264	0.419847	2.96582	0	4.94304	0	1.455	8.95217	2.02e-07	0.02276	0	0.0379333	0.0379333	7.09e-11	3.24e-13	FALSE	yes	1	TRUE	no	NA	NA
ENST00000621204.4	ENSG00000145740.18	SLC30A5	protein_coding	protein_coding	48.8088	48.3547	49.1115	1.40636	0.513708	0.0223995	0.870191	0.778969	1.94742	0	0.428356	0	-7.61281	1.02e-11	0.01602	0.04005	0	-0.04005	3.51e-13	3.51e-13	FALSE	yes	1	TRUE	no	NA	NA
ENST00000380860.8	ENSG00000145740.18	SLC30A5	protein_coding	protein_coding	48.8088	48.3547	49.1115	1.40636	0.513708	0.0223995	0.870191	7.0443	6.28305	7.5518	0.563609	0.244769	0.264971	0.477974	0.14418	0.1297	0.153833	0.0241333	0.580764	3.51e-13	FALSE	no	0.340107	NA	no	NA	NA
ENST00000396591.7	ENSG00000145740.18	SLC30A5	protein_coding	protein_coding	48.8088	48.3547	49.1115	1.40636	0.513708	0.0223995	0.870191	23.8111	22.6877	24.56	0.363381	0.393301	0.11435	0.260539	0.48796	0.4698	0.500067	0.0302667	0.937781	3.51e-13	FALSE	yes	1	TRUE	no	NA	NA
ENST00000504103.5	ENSG00000145740.18	SLC30A5	protein_coding	protein_coding	48.8088	48.3547	49.1115	1.40636	0.513708	0.0223995	0.870191	0.615567	0.36845	0.780312	0.0625981	0.430082	1.06232	NA	0.01254	0.0076	0.0158333	0.00823333	0.953044	3.51e-13	FALSE	no	0.120599	FALSE	no	NA	NA
ENST00000511158.1	ENSG00000145740.18	SLC30A5	protein_coding	protein_coding	48.8088	48.3547	49.1115	1.40636	0.513708	0.0223995	0.870191	11.3838	11.6404	11.2128	2.41382	0.727274	-0.0539469	0.965587	0.23262	0.23945	0.228067	-0.0113833	0.959638	3.51e-13	NA	no	0.01059	FALSE	no	NA	NA
ENST00000507354.5	ENSG00000145740.18	SLC30A5	protein_coding	retained_intron	48.8088	48.3547	49.1115	1.40636	0.513708	0.0223995	0.870191	1.8919	1.67482	2.03661	0.211264	0.527853	0.280638	0.829624	0.03894	0.0348	0.0417	0.0069	0.961693	3.51e-13	NA	NA	1	TRUE	NA	NA	NA
ENST00000502979.1	ENSG00000145740.18	SLC30A5	protein_coding	protein_coding	48.8088	48.3547	49.1115	1.40636	0.513708	0.0223995	0.870191	2.47788	2.50282	2.46125	0.698432	0.251412	-0.0240688	NA	0.05094	0.05225	0.0500667	-0.00218333	0.977315	3.51e-13	FALSE	no	0.0756131	FALSE	no	NA	NA
ENST00000274327.11	ENSG00000113595.14	TRIM23	protein_coding	protein_coding	8.07752	7.83937	8.23629	0.0197471	0.615883	0.071168	0.829365	1.38604	0	2.31007	0	0.450312	7.85802	NA	0.16602	0	0.2767	0.2767	3.59e-13	3.59e-13	FALSE	yes	1	TRUE	no	0	FALSE
ENST00000381018.7	ENSG00000113595.14	TRIM23	protein_coding	protein_coding	8.07752	7.83937	8.23629	0.0197471	0.615883	0.071168	0.829365	1.04987	2.07634	0.365558	0.472434	0.365558	-2.47386	NA	0.12944	0.265	0.0390667	-0.225933	0.421805	3.59e-13	FALSE	yes	1	TRUE	no	0	FALSE
ENST00000231524.13	ENSG00000113595.14	TRIM23	protein_coding	protein_coding	8.07752	7.83937	8.23629	0.0197471	0.615883	0.071168	0.829365	5.20871	5.2969	5.14991	0.026047	0.105898	-0.0405229	0.923876	0.65028	0.6757	0.633333	-0.0423667	0.959638	3.59e-13	FALSE	yes	1	TRUE	no	2	FALSE
ENST00000505205.1	ENSG00000113595.14	TRIM23	protein_coding	nonsense_mediated_decay	8.07752	7.83937	8.23629	0.0197471	0.615883	0.071168	0.829365	0.212878	0.210512	0.214455	0.210512	0.114588	0.0255712	NA	0.02604	0.0268	0.0255333	-0.00126667	0.962098	3.59e-13	TRUE	yes	0.890433	TRUE	no	0	FALSE
ENST00000506400.1	ENSG00000113595.14	TRIM23	protein_coding	nonsense_mediated_decay	8.07752	7.83937	8.23629	0.0197471	0.615883	0.071168	0.829365	0.220025	0.255622	0.196294	0.255622	0.104646	-0.364675	NA	0.02824	0.03255	0.0253667	-0.00718333	0.973576	3.59e-13	TRUE	no	0.0397911	FALSE	no	0	FALSE
ENST00000341627.5	ENSG00000006327.13	TNFRSF12A	protein_coding	protein_coding	117.27	114.385	119.193	2.79998	4.50224	0.0593998	0.702117	18.3419	24.7104	14.0962	0.130049	1.26988	-0.809374	0.000505301	0.15716	0.21615	0.117833	-0.0983167	3.91e-13	3.91e-13	FALSE	yes	0.197231	FALSE	yes	NA	NA
ENST00000326577.8	ENSG00000006327.13	TNFRSF12A	protein_coding	protein_coding	117.27	114.385	119.193	2.79998	4.50224	0.0593998	0.702117	93.9507	85.1089	99.8452	1.0607	3.24709	0.230357	0.0241057	0.8005	0.74425	0.838	0.09375	3.21e-09	3.91e-13	FALSE	yes	0.466096	NA	yes	NA	NA
ENST00000571351.1	ENSG00000006327.13	TNFRSF12A	protein_coding	retained_intron	117.27	114.385	119.193	2.79998	4.50224	0.0593998	0.702117	2.7913	2.30143	3.11788	0.40515	0.160219	0.436399	0.45575	0.0238	0.02005	0.0263	0.00625	0.733652	3.91e-13	NA	NA	0.427633	NA	NA	NA	NA
ENST00000574699.1	ENSG00000006327.13	TNFRSF12A	protein_coding	nonsense_mediated_decay	117.27	114.385	119.193	2.79998	4.50224	0.0593998	0.702117	1.25974	1.66806	0.987528	1.18889	0.516154	-0.750364	NA	0.01058	0.01435	0.00806667	-0.00628333	0.959638	3.91e-13	TRUE	yes	0.0689025	FALSE	yes	NA	NA
ENST00000440711.1	ENSG00000182648.11	LINC01006	lincRNA	lincRNA	17.1736	16.4808	17.6355	0.963014	0.959371	0.0976394	0.77981	0.571796	0	0.952993	0	0.138889	6.58945	NA	0.03246	0	0.0541	0.0541	5.96e-09	5.42e-13	NA	NA	0.208977	FALSE	NA	NA	NA
ENST00000425712.1	ENSG00000182648.11	LINC01006	lincRNA	lincRNA	17.1736	16.4808	17.6355	0.963014	0.959371	0.0976394	0.77981	0.782048	0	1.30341	0	0.189892	7.03718	NA	0.0439	0	0.0731667	0.0731667	5.42e-13	5.42e-13	NA	NA	0.0733731	FALSE	NA	NA	NA
ENST00000418309.1	ENSG00000182648.11	LINC01006	lincRNA	lincRNA	17.1736	16.4808	17.6355	0.963014	0.959371	0.0976394	0.77981	2.59027	1.70072	3.18331	0.314186	0.628569	0.900452	NA	0.15326	0.10465	0.185667	0.0810167	0.73748	5.42e-13	NA	NA	0.145424	FALSE	NA	NA	NA
ENST00000333319.6	ENSG00000182648.11	LINC01006	lincRNA	lincRNA	17.1736	16.4808	17.6355	0.963014	0.959371	0.0976394	0.77981	6.63156	7.04139	6.35834	0.0543884	0.345329	-0.146989	0.686027	0.39006	0.42855	0.3644	-0.06415	0.813759	5.42e-13	NA	NA	0.627208	TRUE	NA	NA	NA
ENST00000435354.1	ENSG00000182648.11	LINC01006	lincRNA	lincRNA	17.1736	16.4808	17.6355	0.963014	0.959371	0.0976394	0.77981	5.52995	6.42984	4.93002	1.25725	1.63296	-0.382508	NA	0.31734	0.387	0.2709	-0.1161	0.868847	5.42e-13	NA	NA	0.0927978	FALSE	NA	NA	NA
ENST00000447933.5	ENSG00000182648.11	LINC01006	lincRNA	lincRNA	17.1736	16.4808	17.6355	0.963014	0.959371	0.0976394	0.77981	0.757442	1.1068	0.524535	0.015929	0.282046	-1.06302	NA	0.04486	0.06745	0.0298	-0.03765	0.882202	5.42e-13	NA	NA	0.253811	NA	NA	NA	NA
ENST00000458645.5	ENSG00000182648.11	LINC01006	lincRNA	lincRNA	17.1736	16.4808	17.6355	0.963014	0.959371	0.0976394	0.77981	0.310524	0.202024	0.382857	0.0185125	0.113956	0.889779	NA	0.01816	0.01235	0.0220333	0.00968333	0.919452	5.42e-13	NA	NA	0.0198541	FALSE	NA	NA	NA
ENST00000566742.5	ENSG00000206053.12	JPT2	protein_coding	protein_coding	191.826	187.023	195.028	11.5564	1.30927	0.060457	0.574429	2.95829	0	4.93049	0	1.43776	8.94851	NA	0.01512	0	0.0252	0.0252	7.35e-13	7.35e-13	FALSE	yes	0.204173	FALSE	no	NA	NA
ENST00000470753.1	ENSG00000184983.9	NDUFA6	protein_coding	protein_coding	64.9875	62.389	66.7199	3.13481	2.21237	0.0968107	0.604365	6.43917	3.26817	8.55316	0.351078	0.635836	1.38525	NA	0.0976	0.0522	0.127867	0.0756667	7.35e-13	7.35e-13	FALSE	yes	0.475384	NA	no	NA	NA
ENST00000248098.7	ENSG00000206053.12	JPT2	protein_coding	protein_coding	191.826	187.023	195.028	11.5564	1.30927	0.060457	0.574429	111.1	118.469	106.188	0.470757	3.07668	-0.15787	0.0633047	0.58098	0.636	0.5443	-0.0917	0.210899	7.35e-13	FALSE	yes	0.586946	TRUE	no	NA	NA
ENST00000602404.5	ENSG00000184983.9	NDUFA6	protein_coding	protein_coding	64.9875	62.389	66.7199	3.13481	2.21237	0.0968107	0.604365	46.1367	49.9735	43.5788	1.15478	7.52395	-0.197495	0.776828	0.70916	0.8021	0.6472	-0.1549	0.594711	7.35e-13	FALSE	yes	0.726503	TRUE	no	NA	NA
ENST00000562684.5	ENSG00000206053.12	JPT2	protein_coding	protein_coding	191.826	187.023	195.028	11.5564	1.30927	0.060457	0.574429	28.7044	23.7601	32.0007	6.44795	2.32859	0.429408	0.536474	0.1487	0.1254	0.164233	0.0388333	0.676916	7.35e-13	FALSE	no	0.753263	TRUE	no	NA	NA
ENST00000617763.1	ENSG00000184983.9	NDUFA6	protein_coding	protein_coding	64.9875	62.389	66.7199	3.13481	2.21237	0.0968107	0.604365	12.0239	8.17799	14.5879	1.77241	6.02799	0.834179	0.643344	0.18692	0.13	0.224867	0.0948667	0.953044	7.35e-13	FALSE	yes	0.759835	TRUE	no	NA	NA
ENST00000382711.9	ENSG00000206053.12	JPT2	protein_coding	protein_coding	191.826	187.023	195.028	11.5564	1.30927	0.060457	0.574429	22.648	20.2425	24.2516	0.0970032	4.29736	0.260579	0.722711	0.11796	0.10865	0.124167	0.0155167	0.959638	7.35e-13	FALSE	no	0.874977	TRUE	no	NA	NA
ENST00000565851.5	ENSG00000206053.12	JPT2	protein_coding	protein_coding	191.826	187.023	195.028	11.5564	1.30927	0.060457	0.574429	20.1121	18.6645	21.0772	5.18174	4.41639	0.175292	0.904219	0.1044	0.09845	0.108367	0.00991667	0.966398	7.35e-13	FALSE	no	0.180273	FALSE	no	NA	NA
ENST00000412056.5	ENSG00000214078.12	CPNE1	protein_coding	protein_coding	89.7377	82.5349	94.5396	1.18704	1.47388	0.195892	0.0836677	1.11532	2.7883	0	0.810455	0	-8.12841	NA	0.01356	0.0339	0	-0.0339	1.15e-12	1.15e-12	FALSE	yes	0.695278	TRUE	no	NA	NA
ENST00000430570.5	ENSG00000214078.12	CPNE1	protein_coding	protein_coding	89.7377	82.5349	94.5396	1.18704	1.47388	0.195892	0.0836677	7.28789	4.85674	8.90865	0.0752533	0.807987	0.873869	0.00194673	0.08002	0.05885	0.0941333	0.0352833	0.0180145	1.15e-12	FALSE	yes	0.899717	TRUE	no	NA	NA
ENST00000486021.5	ENSG00000214078.12	CPNE1	protein_coding	retained_intron	89.7377	82.5349	94.5396	1.18704	1.47388	0.195892	0.0836677	6.47987	3.68173	8.34529	0.24337	0.617554	1.17839	NA	0.07094	0.0446	0.0885	0.0439	0.000174809	1.15e-12	NA	NA	0.0509367	FALSE	NA	NA	NA
ENST00000397443.6	ENSG00000214078.12	CPNE1	protein_coding	protein_coding	89.7377	82.5349	94.5396	1.18704	1.47388	0.195892	0.0836677	17.0025	18.6741	15.888	0.329499	1.38007	-0.232967	0.454419	0.19154	0.22625	0.1684	-0.05785	0.285762	1.15e-12	FALSE	yes	1	TRUE	no	NA	NA
ENST00000473373.1	ENSG00000214078.12	CPNE1	protein_coding	retained_intron	89.7377	82.5349	94.5396	1.18704	1.47388	0.195892	0.0836677	2.09684	2.61857	1.74902	0.559162	0.305453	-0.579507	NA	0.0238	0.03185	0.0184333	-0.0134167	0.554566	1.15e-12	NA	NA	0.247488	FALSE	NA	NA	NA
ENST00000415920.5	ENSG00000214078.12	CPNE1	protein_coding	protein_coding	89.7377	82.5349	94.5396	1.18704	1.47388	0.195892	0.0836677	3.23843	2.4813	3.74319	0.0548706	0.48298	0.591217	NA	0.03574	0.0301	0.0395	0.0094	0.711639	1.15e-12	NA	no	0.973841	TRUE	no	NA	NA
ENST00000462352.5	ENSG00000214078.12	CPNE1	protein_coding	processed_transcript	89.7377	82.5349	94.5396	1.18704	1.47388	0.195892	0.0836677	21.4114	18.4578	23.3805	0.454036	1.31129	0.340906	0.27507	0.23808	0.2236	0.247733	0.0241333	0.79462	1.15e-12	NA	NA	0.908052	TRUE	NA	NA	NA
ENST00000437340.5	ENSG00000214078.12	CPNE1	protein_coding	protein_coding	89.7377	82.5349	94.5396	1.18704	1.47388	0.195892	0.0836677	11.2672	11.1305	11.3584	0.655013	0.441126	0.0292149	0.948256	0.126	0.1348	0.120133	-0.0146667	0.83642	1.15e-12	FALSE	yes	0.993634	TRUE	no	NA	NA
ENST00000439806.6	ENSG00000214078.12	CPNE1	protein_coding	protein_coding	89.7377	82.5349	94.5396	1.18704	1.47388	0.195892	0.0836677	2.0491	1.28249	2.56017	0.161027	0.698829	0.991717	NA	0.0225	0.01555	0.0271333	0.0115833	0.841522	1.15e-12	FALSE	yes	0.340014	NA	no	NA	NA
ENST00000434795.5	ENSG00000214078.12	CPNE1	protein_coding	protein_coding	89.7377	82.5349	94.5396	1.18704	1.47388	0.195892	0.0836677	1.16573	1.48992	0.949602	0.735489	0.483797	-0.644383	NA	0.01322	0.0182	0.0099	-0.0083	0.93192	1.15e-12	FALSE	yes	0.230647	FALSE	no	NA	NA
ENST00000437100.5	ENSG00000214078.12	CPNE1	protein_coding	protein_coding	89.7377	82.5349	94.5396	1.18704	1.47388	0.195892	0.0836677	6.16036	6.25564	6.09683	0.381353	1.0494	-0.0370382	0.984548	0.0689	0.07575	0.0643333	-0.0114167	0.946592	1.15e-12	FALSE	yes	0.0957888	FALSE	no	NA	NA
ENST00000483495.5	ENSG00000214078.12	CPNE1	protein_coding	retained_intron	89.7377	82.5349	94.5396	1.18704	1.47388	0.195892	0.0836677	3.05539	2.67735	3.30742	0.781064	0.502526	0.30388	0.776805	0.03394	0.03255	0.0348667	0.00231667	0.959638	1.15e-12	NA	NA	0.998196	TRUE	NA	NA	NA
ENST00000483359.5	ENSG00000214078.12	CPNE1	protein_coding	retained_intron	89.7377	82.5349	94.5396	1.18704	1.47388	0.195892	0.0836677	0.905395	0.906803	0.904456	0.356269	0.184437	-0.00369847	NA	0.01018	0.01105	0.0096	-0.00145	0.971338	1.15e-12	NA	NA	1	TRUE	NA	NA	NA
ENST00000498056.1	ENSG00000214078.12	CPNE1	protein_coding	processed_transcript	89.7377	82.5349	94.5396	1.18704	1.47388	0.195892	0.0836677	3.15379	2.90627	3.3188	0.590639	1.10946	0.190879	NA	0.035	0.03515	0.0349	-0.00025	0.977563	1.15e-12	NA	NA	0.552546	TRUE	NA	NA	NA
ENST00000562879.5	ENSG00000167526.13	RPL13	protein_coding	nonsense_mediated_decay	3975.91	3976.57	3975.46	233.294	86.3848	-0.000401692	0.963973	485.82	557.812	437.825	31.3715	4.47377	-0.349419	7.57e-06	0.12224	0.1403	0.1102	-0.0301	1.35e-12	1.35e-12	TRUE	yes	0.0406454	FALSE	no	NA	NA
ENST00000565571.5	ENSG00000167526.13	RPL13	protein_coding	retained_intron	3975.91	3976.57	3975.46	233.294	86.3848	-0.000401692	0.963973	658.855	564.508	721.753	19.833	19.7943	0.354506	4.89e-06	0.16578	0.14215	0.181533	0.0393833	1.63e-11	1.35e-12	NA	NA	0.751586	TRUE	NA	NA	NA
ENST00000567815.5	ENSG00000167526.13	RPL13	protein_coding	protein_coding	3975.91	3976.57	3975.46	233.294	86.3848	-0.000401692	0.963973	358.392	236.589	439.594	12.7973	43.2305	0.893756	1.95e-08	0.09054	0.0599	0.110967	0.0510667	0.00802726	1.35e-12	FALSE	yes	0.996199	TRUE	no	NA	NA
ENST00000563270.5	ENSG00000167526.13	RPL13	protein_coding	protein_coding	3975.91	3976.57	3975.46	233.294	86.3848	-0.000401692	0.963973	2196.64	2354.2	2091.6	183.584	94.4812	-0.170633	0.354019	0.55194	0.59135	0.525667	-0.0656833	0.065087	1.35e-12	FALSE	no	0.100343	FALSE	no	NA	NA
ENST00000491523.5	ENSG00000167526.13	RPL13	protein_coding	retained_intron	3975.91	3976.57	3975.46	233.294	86.3848	-0.000401692	0.963973	76.9793	69.2315	82.1445	0.00692945	4.05197	0.246703	0.137342	0.01936	0.01745	0.0206333	0.00318333	0.190611	1.35e-12	NA	NA	0.0162633	FALSE	NA	NA	NA
ENST00000484610.5	ENSG00000167526.13	RPL13	protein_coding	retained_intron	3975.91	3976.57	3975.46	233.294	86.3848	-0.000401692	0.963973	114.673	109.367	118.211	1.48432	2.79403	0.112184	0.360423	0.02886	0.02755	0.0297333	0.00218333	0.574557	1.35e-12	NA	NA	0.801213	TRUE	NA	NA	NA
ENST00000429907.5	ENSG00000197713.14	RPE	protein_coding	protein_coding	61.4794	61.722	61.3176	4.36248	2.02829	-0.00948192	0.99901	4.46896	2.25897	5.94229	0.0466385	0.416761	1.39141	0.000412109	0.07276	0.03685	0.0967	0.05985	2.07e-12	2.07e-12	FALSE	yes	0.999633	TRUE	no	NA	NA
ENST00000359429.10	ENSG00000197713.14	RPE	protein_coding	protein_coding	61.4794	61.722	61.3176	4.36248	2.02829	-0.00948192	0.99901	33.7765	36.2871	32.1028	1.29196	0.444491	-0.176704	0.088902	0.5506	0.5894	0.524733	-0.0646667	0.29136	2.07e-12	FALSE	yes	0.999538	TRUE	no	NA	NA
ENST00000436630.6	ENSG00000197713.14	RPE	protein_coding	protein_coding	61.4794	61.722	61.3176	4.36248	2.02829	-0.00948192	0.99901	4.05088	3.04749	4.71981	1.15288	0.669197	0.629435	0.52774	0.0655	0.0483	0.0769667	0.0286667	0.692189	2.07e-12	FALSE	yes	0.999973	TRUE	no	NA	NA
ENST00000435437.2	ENSG00000197713.14	RPE	protein_coding	protein_coding	61.4794	61.722	61.3176	4.36248	2.02829	-0.00948192	0.99901	1.38889	2.2341	0.825417	0.600128	0.421845	-1.42557	NA	0.0222	0.0357	0.0132	-0.0225	0.844685	2.07e-12	FALSE	yes	0.999159	TRUE	no	NA	NA
ENST00000354506.10	ENSG00000197713.14	RPE	protein_coding	protein_coding	61.4794	61.722	61.3176	4.36248	2.02829	-0.00948192	0.99901	6.38057	7.01743	5.95599	0.210876	0.434028	-0.236236	0.424615	0.10426	0.11405	0.0977333	-0.0163167	0.854038	2.07e-12	FALSE	yes	0.976055	TRUE	no	NA	NA
ENST00000408981.6	ENSG00000197713.14	RPE	protein_coding	protein_coding	61.4794	61.722	61.3176	4.36248	2.02829	-0.00948192	0.99901	5.73324	4.78858	6.36302	1.43041	1.55562	0.409368	0.800361	0.0926	0.0763	0.103467	0.0271667	0.959638	2.07e-12	FALSE	yes	0.416855	NA	no	NA	NA
ENST00000438204.6	ENSG00000197713.14	RPE	protein_coding	protein_coding	61.4794	61.722	61.3176	4.36248	2.02829	-0.00948192	0.99901	3.40747	2.93122	3.72496	0.0460179	1.26209	0.344678	NA	0.0549	0.0478	0.0596333	0.0118333	0.960327	2.07e-12	FALSE	yes	0.987995	TRUE	no	NA	NA
ENST00000438265.5	ENSG00000197713.14	RPE	protein_coding	protein_coding	61.4794	61.722	61.3176	4.36248	2.02829	-0.00948192	0.99901	0.895738	1.49363	0.49714	1.49363	0.388625	-1.568	NA	0.01546	0.02605	0.0084	-0.01765	0.999373	2.07e-12	FALSE	yes	0.356944	NA	no	NA	NA
ENST00000498199.1	ENSG00000206573.8	THUMPD3-AS1	antisense_RNA	antisense_RNA	57.0651	52.0821	60.3871	4.13465	4.10435	0.213415	0.343964	0.947807	2.36952	0	0.474909	0	-7.89453	NA	0.0186	0.0465	0	-0.0465	2.13e-12	2.13e-12	NA	NA	0.111703	FALSE	NA	NA	NA
ENST00000489616.1	ENSG00000206573.8	THUMPD3-AS1	antisense_RNA	antisense_RNA	57.0651	52.0821	60.3871	4.13465	4.10435	0.213415	0.343964	0.727695	0	1.21282	0	0.794475	6.93407	NA	0.0111	0	0.0185	0.0185	0.522864	2.13e-12	NA	NA	0.215495	FALSE	NA	NA	NA
ENST00000521609.5	ENSG00000206573.8	THUMPD3-AS1	antisense_RNA	antisense_RNA	57.0651	52.0821	60.3871	4.13465	4.10435	0.213415	0.343964	4.45605	3.44987	5.12684	0.279201	0.548807	0.570164	0.394011	0.07854	0.0662	0.0867667	0.0205667	0.895039	2.13e-12	NA	NA	0.0525768	FALSE	NA	NA	NA
ENST00000519043.5	ENSG00000206573.8	THUMPD3-AS1	antisense_RNA	antisense_RNA	57.0651	52.0821	60.3871	4.13465	4.10435	0.213415	0.343964	5.89222	4.66841	6.70809	0.367953	0.482702	0.522031	0.242086	0.10418	0.09075	0.113133	0.0223833	0.919364	2.13e-12	NA	NA	0.148789	FALSE	NA	NA	NA
ENST00000522525.5	ENSG00000206573.8	THUMPD3-AS1	antisense_RNA	antisense_RNA	57.0651	52.0821	60.3871	4.13465	4.10435	0.213415	0.343964	5.33236	5.37055	5.3069	0.283205	0.478181	-0.0171668	0.982223	0.09506	0.10335	0.0895333	-0.0138167	0.94569	2.13e-12	NA	NA	0.164759	FALSE	NA	NA	NA
ENST00000469846.2	ENSG00000206573.8	THUMPD3-AS1	antisense_RNA	antisense_RNA	57.0651	52.0821	60.3871	4.13465	4.10435	0.213415	0.343964	3.39987	3.37785	3.41456	0.170042	0.61054	0.0155495	NA	0.06092	0.06555	0.0578333	-0.00771667	0.959638	2.13e-12	NA	NA	0.099628	FALSE	NA	NA	NA
ENST00000518437.1	ENSG00000206573.8	THUMPD3-AS1	antisense_RNA	antisense_RNA	57.0651	52.0821	60.3871	4.13465	4.10435	0.213415	0.343964	13.739	13.0736	14.1826	2.08329	3.303	0.117386	NA	0.2376	0.2494	0.229733	-0.0196667	0.959638	2.13e-12	NA	NA	0.0197701	FALSE	NA	NA	NA
ENST00000520629.5	ENSG00000206573.8	THUMPD3-AS1	antisense_RNA	antisense_RNA	57.0651	52.0821	60.3871	4.13465	4.10435	0.213415	0.343964	1.2021	0	2.00351	0	2.00351	7.65357	NA	0.01764	0	0.0294	0.0294	0.959638	2.13e-12	NA	NA	0.0218404	FALSE	NA	NA	NA
ENST00000481221.6	ENSG00000206573.8	THUMPD3-AS1	antisense_RNA	antisense_RNA	57.0651	52.0821	60.3871	4.13465	4.10435	0.213415	0.343964	4.11801	3.48278	4.5415	0.625833	1.19453	0.381965	NA	0.07148	0.06825	0.0736333	0.00538333	0.966351	2.13e-12	NA	NA	0.301848	NA	NA	NA	NA
ENST00000480904.2	ENSG00000206573.8	THUMPD3-AS1	antisense_RNA	antisense_RNA	57.0651	52.0821	60.3871	4.13465	4.10435	0.213415	0.343964	2.68985	3.22745	2.33145	2.67691	1.06919	-0.467453	NA	0.04808	0.05825	0.0413	-0.01695	0.9731	2.13e-12	NA	NA	0.102598	FALSE	NA	NA	NA
ENST00000523354.1	ENSG00000206573.8	THUMPD3-AS1	antisense_RNA	antisense_RNA	57.0651	52.0821	60.3871	4.13465	4.10435	0.213415	0.343964	7.65778	6.86984	8.18308	0.50811	0.630029	0.252031	NA	0.13536	0.13195	0.137633	0.00568333	0.978017	2.13e-12	NA	NA	0.0158343	FALSE	NA	NA	NA
ENST00000521708.1	ENSG00000206573.8	THUMPD3-AS1	antisense_RNA	antisense_RNA	57.0651	52.0821	60.3871	4.13465	4.10435	0.213415	0.343964	5.27363	4.67234	5.67448	0.833001	0.848853	0.279799	NA	0.09286	0.09155	0.0937333	0.00218333	0.978142	2.13e-12	NA	NA	0.100211	FALSE	NA	NA	NA
ENST00000591641.5	ENSG00000095066.11	HOOK2	protein_coding	retained_intron	67.4891	64.0026	69.8134	6.29844	2.43299	0.125355	0.453665	1.56951	0	2.61584	0	0.562673	8.03664	NA	0.02252	0	0.0375333	0.0375333	2.21e-12	2.21e-12	NA	NA	0.289531	NA	NA	NA	NA
ENST00000586710.5	ENSG00000095066.11	HOOK2	protein_coding	retained_intron	67.4891	64.0026	69.8134	6.29844	2.43299	0.125355	0.453665	2.35317	1.36974	3.00879	0.00360026	0.746901	1.12958	NA	0.03416	0.0216	0.0425333	0.0209333	0.550526	2.21e-12	NA	NA	0.934781	TRUE	NA	NA	NA
ENST00000592512.1	ENSG00000095066.11	HOOK2	protein_coding	retained_intron	67.4891	64.0026	69.8134	6.29844	2.43299	0.125355	0.453665	1.56662	0.546329	2.24681	0.546329	0.209854	2.02027	NA	0.02236	0.00775	0.0321	0.02435	0.57547	2.21e-12	NA	NA	0.147898	FALSE	NA	NA	NA
ENST00000591251.1	ENSG00000095066.11	HOOK2	protein_coding	retained_intron	67.4891	64.0026	69.8134	6.29844	2.43299	0.125355	0.453665	1.22804	1.45936	1.07383	0.164588	1.07383	-0.439056	NA	0.01802	0.02275	0.0148667	-0.00788333	0.658436	2.21e-12	NA	NA	0.0996783	FALSE	NA	NA	NA
ENST00000589915.1	ENSG00000095066.11	HOOK2	protein_coding	retained_intron	67.4891	64.0026	69.8134	6.29844	2.43299	0.125355	0.453665	1.94961	3.37473	0.999536	1.39688	0.701664	-1.74535	NA	0.02874	0.0511	0.0138333	-0.0372667	0.759201	2.21e-12	NA	NA	0.020964	FALSE	NA	NA	NA
ENST00000592808.1	ENSG00000095066.11	HOOK2	protein_coding	retained_intron	67.4891	64.0026	69.8134	6.29844	2.43299	0.125355	0.453665	2.09775	2.4457	1.86578	0.0804437	0.59826	-0.388646	NA	0.03174	0.03845	0.0272667	-0.0111833	0.924882	2.21e-12	NA	NA	0.0848457	FALSE	NA	NA	NA
ENST00000264827.9	ENSG00000095066.11	HOOK2	protein_coding	protein_coding	67.4891	64.0026	69.8134	6.29844	2.43299	0.125355	0.453665	32.3694	29.551	34.2482	0.913068	1.1323	0.212754	0.0576686	0.4814	0.4648	0.492467	0.0276667	0.959638	2.21e-12	FALSE	yes	1	TRUE	no	NA	NA
ENST00000586719.5	ENSG00000095066.11	HOOK2	protein_coding	nonsense_mediated_decay	67.4891	64.0026	69.8134	6.29844	2.43299	0.125355	0.453665	1.10186	1.61147	0.762115	1.30562	0.0900765	-1.07042	NA	0.01598	0.0234	0.0110333	-0.0123667	0.959638	2.21e-12	TRUE	yes	0.246439	FALSE	no	NA	NA
ENST00000589134.5	ENSG00000095066.11	HOOK2	protein_coding	retained_intron	67.4891	64.0026	69.8134	6.29844	2.43299	0.125355	0.453665	5.30838	5.18587	5.39005	0.00676633	0.892776	0.0556091	0.972873	0.0787	0.08185	0.0766	-0.00525	0.959638	2.21e-12	NA	NA	0.913727	TRUE	NA	NA	NA
ENST00000589400.5	ENSG00000095066.11	HOOK2	protein_coding	protein_coding	67.4891	64.0026	69.8134	6.29844	2.43299	0.125355	0.453665	0.879102	1.63899	0.372512	1.63899	0.372512	-2.108	NA	0.01276	0.0233	0.00573333	-0.0175667	0.959638	2.21e-12	FALSE	yes	0.493456	NA	no	NA	NA
ENST00000592259.1	ENSG00000095066.11	HOOK2	protein_coding	retained_intron	67.4891	64.0026	69.8134	6.29844	2.43299	0.125355	0.453665	0.831327	0.848961	0.819571	0.0231602	0.0988247	-0.0502285	NA	0.01238	0.01335	0.0117333	-0.00161667	0.959638	2.21e-12	NA	NA	0.445341	NA	NA	NA	NA
ENST00000397668.7	ENSG00000095066.11	HOOK2	protein_coding	protein_coding	67.4891	64.0026	69.8134	6.29844	2.43299	0.125355	0.453665	2.2783	2.07115	2.4164	0.457227	1.12693	0.221435	0.921654	0.03402	0.0334	0.0344333	0.00103333	0.97044	2.21e-12	FALSE	yes	1	TRUE	no	NA	NA
ENST00000590839.5	ENSG00000095066.11	HOOK2	protein_coding	protein_coding	67.4891	64.0026	69.8134	6.29844	2.43299	0.125355	0.453665	1.95944	2.31341	1.72346	1.6117	0.281464	-0.422588	NA	0.03036	0.039	0.0246	-0.0144	0.973692	2.21e-12	FALSE	yes	0.178253	FALSE	no	NA	NA
ENST00000588052.5	ENSG00000095066.11	HOOK2	protein_coding	protein_coding	67.4891	64.0026	69.8134	6.29844	2.43299	0.125355	0.453665	10.1633	9.91491	10.329	2.63562	0.573167	0.0589672	0.953164	0.14968	0.1523	0.147933	-0.00436667	0.978718	2.21e-12	FALSE	yes	0.129203	FALSE	no	NA	NA
ENST00000530988.1	ENSG00000132768.13	DPH2	protein_coding	retained_intron	34.5755	36.3156	33.4154	1.67129	1.4894	-0.120041	0.578656	0.58616	1.4654	0	0.0482833	0	-7.20496	NA	0.0162	0.0405	0	-0.0405	2.6e-12	2.6e-12	NA	NA	0.471548	NA	NA	NA	NA
ENST00000396758.6	ENSG00000132768.13	DPH2	protein_coding	protein_coding	34.5755	36.3156	33.4154	1.67129	1.4894	-0.120041	0.578656	0.559799	1.0124	0.258064	0.421086	0.258064	-1.93131	NA	0.01604	0.0285	0.00773333	-0.0207667	0.629709	2.6e-12	FALSE	yes	0.999995	TRUE	no	NA	NA
ENST00000495421.1	ENSG00000132768.13	DPH2	protein_coding	nonsense_mediated_decay	34.5755	36.3156	33.4154	1.67129	1.4894	-0.120041	0.578656	3.24169	2.38116	3.81538	0.656969	1.23868	0.677889	0.580576	0.09366	0.0649	0.112833	0.0479333	0.894303	2.6e-12	TRUE	no	1	TRUE	no	NA	NA
ENST00000534655.1	ENSG00000132768.13	DPH2	protein_coding	retained_intron	34.5755	36.3156	33.4154	1.67129	1.4894	-0.120041	0.578656	0.508249	0.463876	0.537832	0.463876	0.095987	0.209223	NA	0.01472	0.0122	0.0164	0.0042	0.937835	2.6e-12	NA	NA	0.0210257	FALSE	NA	NA	NA
ENST00000527567.1	ENSG00000132768.13	DPH2	protein_coding	retained_intron	34.5755	36.3156	33.4154	1.67129	1.4894	-0.120041	0.578656	1.97789	1.57498	2.2465	0.239429	0.72687	0.509616	NA	0.05736	0.0438	0.0664	0.0226	0.948156	2.6e-12	NA	NA	0.983817	TRUE	NA	NA	NA
ENST00000529729.1	ENSG00000132768.13	DPH2	protein_coding	processed_transcript	34.5755	36.3156	33.4154	1.67129	1.4894	-0.120041	0.578656	0.420572	0.316047	0.490254	0.316047	0.2685	0.61758	NA	0.01178	0.0083	0.0141	0.0058	0.951992	2.6e-12	NA	NA	0.99969	TRUE	NA	NA	NA
ENST00000490861.5	ENSG00000132768.13	DPH2	protein_coding	retained_intron	34.5755	36.3156	33.4154	1.67129	1.4894	-0.120041	0.578656	2.00004	2.26396	1.8241	0.653137	0.361569	-0.310136	NA	0.05878	0.0633	0.0557667	-0.00753333	0.960403	2.6e-12	NA	NA	0.994745	TRUE	NA	NA	NA
ENST00000471934.1	ENSG00000132768.13	DPH2	protein_coding	processed_transcript	34.5755	36.3156	33.4154	1.67129	1.4894	-0.120041	0.578656	3.26884	3.52188	3.10015	1.06591	0.442535	-0.183454	NA	0.09492	0.09585	0.0943	-0.00155	0.982027	2.6e-12	NA	NA	0.919507	TRUE	NA	NA	NA
ENST00000255108.7	ENSG00000132768.13	DPH2	protein_coding	protein_coding	34.5755	36.3156	33.4154	1.67129	1.4894	-0.120041	0.578656	21.2162	22.2907	20.4998	0.638028	1.68579	-0.120773	0.754829	0.61402	0.6143	0.613833	-0.000466667	0.995006	2.6e-12	FALSE	yes	1	TRUE	no	NA	NA
ENST00000578363.5	ENSG00000073350.13	LLGL2	protein_coding	protein_coding	358.959	314.268	388.754	3.47186	4.22856	0.306853	1.5e-07	36.1349	37.0921	35.4968	0.349011	1.58121	-0.0634049	0.850203	0.10198	0.11805	0.0912667	-0.0267833	0.00117409	3.2e-12	FALSE	yes	0.999992	TRUE	no	NA	NA
ENST00000578638.5	ENSG00000073350.13	LLGL2	protein_coding	nonsense_mediated_decay	358.959	314.268	388.754	3.47186	4.22856	0.306853	1.5e-07	13.4332	13.3941	13.4592	0.562923	0.215582	0.00698812	0.981697	0.0378	0.0426	0.0346	-0.008	0.0473175	3.2e-12	NA	no	1	TRUE	no	NA	NA
ENST00000167462.9	ENSG00000073350.13	LLGL2	protein_coding	protein_coding	358.959	314.268	388.754	3.47186	4.22856	0.306853	1.5e-07	23.9699	16.0951	29.2198	0.186419	0.636773	0.859922	3.1e-33	0.06556	0.0512	0.0751333	0.0239333	3.2e-12	3.2e-12	FALSE	yes	1	TRUE	no	NA	NA
ENST00000579392.5	ENSG00000073350.13	LLGL2	protein_coding	protein_coding	358.959	314.268	388.754	3.47186	4.22856	0.306853	1.5e-07	11.4233	8.67458	13.2558	0.123775	0.291758	0.611185	0.179045	0.0315	0.0276	0.0341	0.0065	0.0613813	3.2e-12	FALSE	no	0.148401	FALSE	no	NA	NA
ENST00000577500.5	ENSG00000073350.13	LLGL2	protein_coding	retained_intron	358.959	314.268	388.754	3.47186	4.22856	0.306853	1.5e-07	34.6536	32.2219	36.2748	0.0666367	0.867525	0.170874	0.060421	0.09704	0.10255	0.0933667	-0.00918333	0.582017	3.2e-12	NA	NA	1	TRUE	NA	NA	NA
ENST00000577211.1	ENSG00000073350.13	LLGL2	protein_coding	retained_intron	358.959	314.268	388.754	3.47186	4.22856	0.306853	1.5e-07	40.4446	33.8939	44.8116	0.188993	0.674746	0.402743	0.0274025	0.11236	0.1079	0.115333	0.00743333	0.698388	3.2e-12	NA	NA	0.0946496	FALSE	NA	NA	NA
ENST00000579092.1	ENSG00000073350.13	LLGL2	protein_coding	retained_intron	358.959	314.268	388.754	3.47186	4.22856	0.306853	1.5e-07	11.8483	9.61623	13.3363	0.303578	0.561459	0.471399	0.153056	0.03284	0.0306	0.0343333	0.00373333	0.747478	3.2e-12	NA	NA	0.360968	NA	NA	NA	NA
ENST00000392550.7	ENSG00000073350.13	LLGL2	protein_coding	protein_coding	358.959	314.268	388.754	3.47186	4.22856	0.306853	1.5e-07	52.8815	46.7865	56.9449	0.959639	1.17555	0.283418	6.39e-06	0.14746	0.1489	0.1465	-0.0024	0.970472	3.2e-12	FALSE	yes	1	TRUE	no	NA	NA
ENST00000545227.6	ENSG00000073350.13	LLGL2	protein_coding	retained_intron	358.959	314.268	388.754	3.47186	4.22856	0.306853	1.5e-07	5.21741	4.45604	5.72499	1.4383	0.999059	0.360794	0.658413	0.01454	0.01425	0.0147333	0.000483333	0.971338	3.2e-12	NA	NA	1	TRUE	NA	NA	NA
ENST00000582393.5	ENSG00000073350.13	LLGL2	protein_coding	retained_intron	358.959	314.268	388.754	3.47186	4.22856	0.306853	1.5e-07	6.47134	5.60273	7.05042	0.321681	0.428583	0.33105	0.668412	0.01802	0.01785	0.0181333	0.000283333	0.973745	3.2e-12	NA	NA	0.0619227	FALSE	NA	NA	NA
ENST00000375227.8	ENSG00000073350.13	LLGL2	protein_coding	protein_coding	358.959	314.268	388.754	3.47186	4.22856	0.306853	1.5e-07	109.812	96.3417	118.793	5.12986	2.46744	0.302184	0.0015496	0.3059	0.30645	0.305533	-0.000916667	0.993238	3.2e-12	FALSE	yes	0.999997	TRUE	no	NA	NA
ENST00000287598.10	ENSG00000156970.12	BUB1B	protein_coding	protein_coding	24.3346	26.6787	22.7719	0.715507	1.08985	-0.228339	0.120983	21.0346	24.4234	18.7754	1.19686	0.837739	-0.379243	0.00246638	0.86082	0.9149	0.824767	-0.0901333	2.61e-08	3.24e-12	FALSE	yes	1	TRUE	no	NA	NA
ENST00000559772.1	ENSG00000156970.12	BUB1B	protein_coding	retained_intron	24.3346	26.6787	22.7719	0.715507	1.08985	-0.228339	0.120983	1.13674	0	1.89457	0	0.330682	7.57332	NA	0.05038	0	0.0839667	0.0839667	3.24e-12	3.24e-12	NA	NA	0.0732165	FALSE	NA	NA	NA
ENST00000558151.1	ENSG00000156970.12	BUB1B	protein_coding	retained_intron	24.3346	26.6787	22.7719	0.715507	1.08985	-0.228339	0.120983	0.705622	0.458778	0.870184	0.458778	0.229945	0.908899	NA	0.02974	0.01675	0.0384	0.02165	0.807453	3.24e-12	NA	NA	0.015485	FALSE	NA	NA	NA
ENST00000559461.1	ENSG00000156970.12	BUB1B	protein_coding	retained_intron	24.3346	26.6787	22.7719	0.715507	1.08985	-0.228339	0.120983	0.632167	1.00976	0.380442	0.734488	0.212411	-1.38504	NA	0.02498	0.0386	0.0159	-0.0227	0.958085	3.24e-12	NA	NA	0.131128	FALSE	NA	NA	NA
ENST00000587404.1	ENSG00000079313.13	REXO1	protein_coding	retained_intron	9.77165	8.38197	10.6981	0.409418	0.261644	0.351623	0.0625713	1.031	0	1.71833	0	0.264661	7.43323	NA	0.09592	0	0.159867	0.159867	4.76e-12	4.76e-12	NA	NA	0.0121626	FALSE	NA	0	TRUE
ENST00000170168.8	ENSG00000079313.13	REXO1	protein_coding	protein_coding	9.77165	8.38197	10.6981	0.409418	0.261644	0.351623	0.0625713	4.59189	4.54836	4.62091	0.0829112	0.118082	0.0227817	0.943674	0.47676	0.54345	0.4323	-0.11115	0.0772744	4.76e-12	FALSE	yes	1	TRUE	no	0	TRUE
ENST00000586291.1	ENSG00000079313.13	REXO1	protein_coding	retained_intron	9.77165	8.38197	10.6981	0.409418	0.261644	0.351623	0.0625713	0.39561	0.735194	0.169221	0.327391	0.0890702	-2.05588	NA	0.04372	0.08605	0.0155	-0.07055	0.407076	4.76e-12	NA	NA	0.0659126	FALSE	NA	2	TRUE
ENST00000586343.2	ENSG00000079313.13	REXO1	protein_coding	nonsense_mediated_decay	9.77165	8.38197	10.6981	0.409418	0.261644	0.351623	0.0625713	0.85216	0.460121	1.11352	0.0190478	0.124562	1.25692	NA	0.08492	0.05515	0.104767	0.0496167	0.481543	4.76e-12	NA	no	0.0239388	FALSE	no	0	TRUE
ENST00000590936.5	ENSG00000079313.13	REXO1	protein_coding	nonsense_mediated_decay	9.77165	8.38197	10.6981	0.409418	0.261644	0.351623	0.0625713	2.7976	2.56693	2.95137	0.0895292	0.212793	0.20061	0.822039	0.28806	0.30645	0.2758	-0.03065	0.928941	4.76e-12	NA	no	0.980321	TRUE	no	0	TRUE
ENST00000587524.1	ENSG00000079313.13	REXO1	protein_coding	processed_transcript	9.77165	8.38197	10.6981	0.409418	0.261644	0.351623	0.0625713	0.103405	0.0713655	0.124765	0.0713655	0.0876342	0.727956	NA	0.01062	0.00895	0.0117333	0.00278333	0.975827	4.76e-12	NA	NA	0.616098	TRUE	NA	0	TRUE
ENST00000554169.1	ENSG00000247092.6	SNHG10	antisense_RNA	antisense_RNA	10.7597	11.4931	10.2707	0.0950469	0.176637	-0.162087	0.759633	7.08672	8.76141	5.97026	0.230653	0.0635806	-0.552601	0.0899514	0.6539	0.76255	0.581467	-0.181083	4.93e-06	5.64e-12	NA	NA	0.0849009	FALSE	NA	0	FALSE
ENST00000555866.5	ENSG00000247092.6	SNHG10	antisense_RNA	antisense_RNA	10.7597	11.4931	10.2707	0.0950469	0.176637	-0.162087	0.759633	0.925554	0	1.54259	0	0.244001	7.27853	NA	0.0897	0	0.1495	0.1495	5.64e-12	5.64e-12	NA	NA	0.0902992	FALSE	NA	0	FALSE
ENST00000500370.2	ENSG00000247092.6	SNHG10	antisense_RNA	antisense_RNA	10.7597	11.4931	10.2707	0.0950469	0.176637	-0.162087	0.759633	1.54621	1.49522	1.5802	0.108686	0.128131	0.079236	NA	0.14458	0.13	0.1543	0.0243	0.925074	5.64e-12	NA	NA	0.0439199	FALSE	NA	2	FALSE
ENST00000553559.1	ENSG00000247092.6	SNHG10	antisense_RNA	antisense_RNA	10.7597	11.4931	10.2707	0.0950469	0.176637	-0.162087	0.759633	1.20122	1.23652	1.17768	0.217014	0.10783	-0.0697648	NA	0.1118	0.1074	0.114733	0.00733333	0.962081	5.64e-12	NA	NA	0.185477	FALSE	NA	0	FALSE
ENST00000496555.1	ENSG00000115760.13	BIRC6	protein_coding	retained_intron	36.9743	34.3936	38.6948	0.330785	1.00838	0.16995	0.0498523	3.04135	1.18352	4.2799	0.0908633	0.104177	1.84572	NA	0.08026	0.0344	0.110833	0.0764333	5.93e-12	5.93e-12	NA	NA	0.134818	FALSE	NA	NA	NA
ENST00000628568.1	ENSG00000022267.16	FHL1	protein_coding	protein_coding	5.31822	4.85039	5.6301	0.36949	0.133306	0.214649	0.574429	0.859425	0	1.43238	0	0.20235	7.1723	NA	0.15186	0	0.2531	0.2531	5.93e-12	5.93e-12	FALSE	yes	0.998162	TRUE	no	0	FALSE
ENST00000421745.6	ENSG00000115760.13	BIRC6	protein_coding	protein_coding	36.9743	34.3936	38.6948	0.330785	1.00838	0.16995	0.0498523	12.8186	13.0519	12.6631	0.14051	0.256323	-0.043596	0.784398	0.34824	0.37945	0.327433	-0.0520167	0.0783509	5.93e-12	FALSE	yes	1	TRUE	no	NA	NA
ENST00000394153.6	ENSG00000022267.16	FHL1	protein_coding	protein_coding	5.31822	4.85039	5.6301	0.36949	0.133306	0.214649	0.574429	1.55158	2.78154	0.731599	0.185226	0.731599	-1.91235	0.862435	0.30672	0.5739	0.1286	-0.4453	0.401559	5.93e-12	FALSE	yes	0.998364	TRUE	no	0	FALSE
ENST00000444173.5	ENSG00000115760.13	BIRC6	protein_coding	protein_coding	36.9743	34.3936	38.6948	0.330785	1.00838	0.16995	0.0498523	4.0586	4.20328	3.96214	0.353918	0.269358	-0.0850266	NA	0.11016	0.1221	0.1022	-0.0199	0.668283	5.93e-12	FALSE	no	0.279066	NA	no	NA	NA
ENST00000465130.1	ENSG00000115760.13	BIRC6	protein_coding	retained_intron	36.9743	34.3936	38.6948	0.330785	1.00838	0.16995	0.0498523	0.55472	0.348231	0.692379	0.0627688	0.16618	0.97136	NA	0.0148	0.01015	0.0179	0.00775	0.784864	5.93e-12	NA	NA	0.0348051	FALSE	NA	NA	NA
ENST00000370690.7	ENSG00000022267.16	FHL1	protein_coding	protein_coding	5.31822	4.85039	5.6301	0.36949	0.133306	0.214649	0.574429	2.09881	0.967206	2.85322	0.386086	1.12457	1.5509	0.261388	0.38842	0.20665	0.5096	0.30295	0.793571	5.93e-12	FALSE	yes	0.999379	TRUE	no	0	FALSE
ENST00000470250.1	ENSG00000115760.13	BIRC6	protein_coding	retained_intron	36.9743	34.3936	38.6948	0.330785	1.00838	0.16995	0.0498523	1.00358	0.64229	1.24445	0.64229	0.314781	0.943467	NA	0.02646	0.0185	0.0317667	0.0132667	0.8824	5.93e-12	NA	NA	0.253192	NA	NA	NA	NA
ENST00000627578.2	ENSG00000022267.16	FHL1	protein_coding	protein_coding	5.31822	4.85039	5.6301	0.36949	0.133306	0.214649	0.574429	0.0652485	0.163121	0	0.163121	0	-4.11371	NA	0.0125	0.03125	0	-0.03125	0.906714	5.93e-12	FALSE	yes	0.137073	FALSE	no	0	FALSE
ENST00000466527.1	ENSG00000115760.13	BIRC6	protein_coding	retained_intron	36.9743	34.3936	38.6948	0.330785	1.00838	0.16995	0.0498523	1.4568	2.03033	1.07444	0.786526	0.554923	-0.911844	NA	0.03992	0.05925	0.0270333	-0.0322167	0.928987	5.93e-12	NA	NA	0.993286	TRUE	NA	NA	NA
ENST00000497023.1	ENSG00000115760.13	BIRC6	protein_coding	retained_intron	36.9743	34.3936	38.6948	0.330785	1.00838	0.16995	0.0498523	1.34713	0.949997	1.61188	0.56907	0.421183	0.756568	NA	0.03618	0.02745	0.042	0.01455	0.940473	5.93e-12	NA	NA	0.917006	TRUE	NA	NA	NA
ENST00000449474.5	ENSG00000022267.16	FHL1	protein_coding	protein_coding	5.31822	4.85039	5.6301	0.36949	0.133306	0.214649	0.574429	0.464034	0.586217	0.382579	0.586217	0.382579	-0.602853	NA	0.08528	0.1123	0.0672667	-0.0450333	0.959638	5.93e-12	FALSE	yes	0.133737	FALSE	no	0	FALSE
ENST00000618438.4	ENSG00000022267.16	FHL1	protein_coding	protein_coding	5.31822	4.85039	5.6301	0.36949	0.133306	0.214649	0.574429	0.1216	0.230561	0.0489587	0.230561	0.0489587	-2.02863	NA	0.02604	0.05145	0.0091	-0.04235	0.959638	5.93e-12	FALSE	yes	0.828755	TRUE	no	0	FALSE
ENST00000471232.5	ENSG00000115760.13	BIRC6	protein_coding	retained_intron	36.9743	34.3936	38.6948	0.330785	1.00838	0.16995	0.0498523	12.1035	11.36	12.5991	0.298351	0.423686	0.149236	0.329309	0.32814	0.33045	0.3266	-0.00385	0.969476	5.93e-12	NA	NA	1	TRUE	NA	NA	NA
ENST00000511716.1	ENSG00000175309.14	PHYKPL	protein_coding	processed_transcript	22.1018	19.3605	23.9293	0.39761	0.728702	0.305523	0.0871186	0.689025	1.12397	0.39906	0.221778	0.084038	-1.471	NA	0.03324	0.05835	0.0165	-0.04185	0.0215916	9.55e-12	NA	NA	0.447792	NA	NA	NA	NA
ENST00000393488.2	ENSG00000175309.14	PHYKPL	protein_coding	nonsense_mediated_decay	22.1018	19.3605	23.9293	0.39761	0.728702	0.305523	0.0871186	0.232438	0.581096	0	0.020367	0	-5.88532	NA	0.012	0.03	0	-0.03	2.05e-06	9.55e-12	NA	no	0.994379	TRUE	no	NA	NA
ENST00000506045.1	ENSG00000175309.14	PHYKPL	protein_coding	nonsense_mediated_decay	22.1018	19.3605	23.9293	0.39761	0.728702	0.305523	0.0871186	0.990151	0	1.65025	0	0.270476	7.37526	NA	0.04106	0	0.0684333	0.0684333	9.55e-12	9.55e-12	TRUE	no	0.993313	TRUE	no	NA	NA
ENST00000514424.5	ENSG00000175309.14	PHYKPL	protein_coding	retained_intron	22.1018	19.3605	23.9293	0.39761	0.728702	0.305523	0.0871186	1.36223	0.68584	1.81316	0.186281	0.253742	1.38961	NA	0.05928	0.0352	0.0753333	0.0401333	0.113597	9.55e-12	NA	NA	0.0884035	FALSE	NA	NA	NA
ENST00000481436.5	ENSG00000175309.14	PHYKPL	protein_coding	retained_intron	22.1018	19.3605	23.9293	0.39761	0.728702	0.305523	0.0871186	1.4021	1.69408	1.20745	0.501258	0.166746	-0.485138	0.65706	0.06514	0.087	0.0505667	-0.0364333	0.626687	9.55e-12	NA	NA	0.961339	TRUE	NA	NA	NA
ENST00000510991.5	ENSG00000175309.14	PHYKPL	protein_coding	retained_intron	22.1018	19.3605	23.9293	0.39761	0.728702	0.305523	0.0871186	1.76834	1.98449	1.62424	0.370568	0.190673	-0.287407	NA	0.08222	0.10295	0.0684	-0.03455	0.694433	9.55e-12	NA	NA	0.027427	FALSE	NA	NA	NA
ENST00000308158.9	ENSG00000175309.14	PHYKPL	protein_coding	protein_coding	22.1018	19.3605	23.9293	0.39761	0.728702	0.305523	0.0871186	6.42924	5.14554	7.28504	0.604488	0.347652	0.500794	0.073439	0.28912	0.2665	0.3042	0.0377	0.853707	9.55e-12	FALSE	yes	1	TRUE	no	NA	NA
ENST00000506001.1	ENSG00000175309.14	PHYKPL	protein_coding	retained_intron	22.1018	19.3605	23.9293	0.39761	0.728702	0.305523	0.0871186	0.896072	0.506231	1.15597	0.506231	0.387016	1.17543	NA	0.03874	0.0256	0.0475	0.0219	0.875663	9.55e-12	NA	NA	0.0644984	FALSE	NA	NA	NA
ENST00000476487.5	ENSG00000175309.14	PHYKPL	protein_coding	retained_intron	22.1018	19.3605	23.9293	0.39761	0.728702	0.305523	0.0871186	1.46992	1.51381	1.44066	0.3006	0.0887655	-0.0709759	0.960872	0.06748	0.0779	0.0605333	-0.0173667	0.891238	9.55e-12	NA	NA	0.999995	TRUE	NA	NA	NA
ENST00000489262.5	ENSG00000175309.14	PHYKPL	protein_coding	retained_intron	22.1018	19.3605	23.9293	0.39761	0.728702	0.305523	0.0871186	1.07112	0.79662	1.25413	0.235891	0.0776551	0.648178	0.3994	0.0479	0.04095	0.0525333	0.0115833	0.903085	9.55e-12	NA	NA	1	TRUE	NA	NA	NA
ENST00000494126.6	ENSG00000175309.14	PHYKPL	protein_coding	retained_intron	22.1018	19.3605	23.9293	0.39761	0.728702	0.305523	0.0871186	0.278205	0.380438	0.21005	0.159901	0.106195	-0.827264	NA	0.01336	0.01985	0.00903333	-0.0108167	0.932396	9.55e-12	NA	NA	0.999998	TRUE	NA	NA	NA
ENST00000481811.5	ENSG00000175309.14	PHYKPL	protein_coding	processed_transcript	22.1018	19.3605	23.9293	0.39761	0.728702	0.305523	0.0871186	1.10514	1.08547	1.11825	0.147526	0.101623	0.0425285	0.971337	0.05046	0.05595	0.0468	-0.00915	0.935667	9.55e-12	NA	NA	0.184151	FALSE	NA	NA	NA
ENST00000504096.1	ENSG00000175309.14	PHYKPL	protein_coding	retained_intron	22.1018	19.3605	23.9293	0.39761	0.728702	0.305523	0.0871186	0.985522	0.791802	1.11467	0.390827	0.091122	0.488182	NA	0.04448	0.04135	0.0465667	0.00521667	0.959638	9.55e-12	NA	NA	0.0148349	FALSE	NA	NA	NA
ENST00000493197.5	ENSG00000175309.14	PHYKPL	protein_coding	nonsense_mediated_decay	22.1018	19.3605	23.9293	0.39761	0.728702	0.305523	0.0871186	0.348422	0.296658	0.382931	0.184512	0.0571651	0.357643	NA	0.0156	0.01515	0.0159	0.00075	0.965825	9.55e-12	TRUE	no	0.99936	TRUE	no	NA	NA
ENST00000476170.2	ENSG00000175309.14	PHYKPL	protein_coding	protein_coding	22.1018	19.3605	23.9293	0.39761	0.728702	0.305523	0.0871186	2.7546	2.42098	2.97701	0.0149438	0.141574	0.297164	NA	0.12502	0.1251	0.124967	-0.000133333	0.991613	9.55e-12	FALSE	yes	0.798959	TRUE	no	NA	NA
ENST00000464113.1	ENSG00000158796.16	DEDD	protein_coding	protein_coding	20.6049	18.7159	21.8643	0.10989	1.22703	0.224201	0.241979	1.27415	0	2.12359	0	0.53428	7.73714	NA	0.05708	0	0.0951333	0.0951333	1.07e-11	1.07e-11	FALSE	yes	0.469194	NA	no	NA	NA
ENST00000486041.5	ENSG00000158796.16	DEDD	protein_coding	processed_transcript	20.6049	18.7159	21.8643	0.10989	1.22703	0.224201	0.241979	1.44795	0.235573	2.2562	0.235573	0.432423	3.20605	NA	0.0677	0.0125	0.1045	0.092	0.182976	1.07e-11	NA	NA	0.998923	TRUE	NA	NA	NA
ENST00000368006.7	ENSG00000158796.16	DEDD	protein_coding	protein_coding	20.6049	18.7159	21.8643	0.10989	1.22703	0.224201	0.241979	13.0639	13.43	12.8198	1.17552	0.831914	-0.0670348	0.891943	0.64144	0.7172	0.590933	-0.126267	0.629709	1.07e-11	FALSE	yes	0.999981	TRUE	no	NA	NA
ENST00000473679.6	ENSG00000158796.16	DEDD	protein_coding	processed_transcript	20.6049	18.7159	21.8643	0.10989	1.22703	0.224201	0.241979	0.370207	0.568597	0.237947	0.303525	0.120653	-1.22253	NA	0.01838	0.03025	0.0104667	-0.0197833	0.857742	1.07e-11	NA	NA	0.315387	NA	NA	NA	NA
ENST00000463227.5	ENSG00000158796.16	DEDD	protein_coding	processed_transcript	20.6049	18.7159	21.8643	0.10989	1.22703	0.224201	0.241979	1.82911	1.53674	2.02401	0.578404	0.136731	0.395098	NA	0.08896	0.08195	0.0936333	0.0116833	0.959638	1.07e-11	NA	NA	0.334394	NA	NA	NA	NA
ENST00000490843.6	ENSG00000158796.16	DEDD	protein_coding	protein_coding	20.6049	18.7159	21.8643	0.10989	1.22703	0.224201	0.241979	0.740171	1.35595	0.329655	1.35595	0.329655	-2.00776	NA	0.0373	0.0729	0.0135667	-0.0593333	0.959638	1.07e-11	FALSE	yes	0.999992	TRUE	no	NA	NA
ENST00000368005.5	ENSG00000158796.16	DEDD	protein_coding	protein_coding	20.6049	18.7159	21.8643	0.10989	1.22703	0.224201	0.241979	1.40358	1.27946	1.48633	0.677996	0.665294	0.214659	NA	0.06656	0.06855	0.0652333	-0.00331667	0.981965	1.07e-11	FALSE	yes	0.999999	TRUE	no	NA	NA
ENST00000485226.1	ENSG00000117632.22	STMN1	protein_coding	processed_transcript	290.871	317.783	272.929	15.7183	6.75296	-0.219508	0.0235225	36.3474	33.4796	38.2594	1.02059	0.843885	0.192478	0.61506	0.1263	0.10545	0.1402	0.03475	1.42e-11	1.42e-11	NA	NA	0.0473848	FALSE	NA	NA	NA
ENST00000374291.5	ENSG00000117632.22	STMN1	protein_coding	protein_coding	290.871	317.783	272.929	15.7183	6.75296	-0.219508	0.0235225	135.923	155.748	122.707	10.5848	3.58587	-0.343972	0.00420313	0.46564	0.48965	0.449633	-0.0400167	0.123215	1.42e-11	FALSE	yes	0.946322	TRUE	no	NA	NA
ENST00000455785.6	ENSG00000117632.22	STMN1	protein_coding	protein_coding	290.871	317.783	272.929	15.7183	6.75296	-0.219508	0.0235225	114.91	124.715	108.373	4.81339	3.71712	-0.202615	0.0776552	0.39526	0.39265	0.397	0.00435	0.960166	1.42e-11	FALSE	yes	0.956721	TRUE	no	NA	NA
ENST00000511486.5	ENSG00000113494.16	PRLR	protein_coding	protein_coding	33.2001	34.4853	32.3433	2.20678	0.822242	-0.0924884	0.535397	0.802628	0	1.33771	0	0.170815	7.07437	NA	0.025	0	0.0416667	0.0416667	1.46e-11	1.46e-11	FALSE	no	1	TRUE	yes	NA	NA
ENST00000620785.4	ENSG00000113494.16	PRLR	protein_coding	protein_coding	33.2001	34.4853	32.3433	2.20678	0.822242	-0.0924884	0.535397	2.17656	2.78564	1.7705	0.670493	0.0489923	-0.650894	0.0431915	0.0648	0.07985	0.0547667	-0.0250833	0.521055	1.46e-11	FALSE	no	1	TRUE	yes	NA	NA
ENST00000504500.5	ENSG00000113494.16	PRLR	protein_coding	protein_coding	33.2001	34.4853	32.3433	2.20678	0.822242	-0.0924884	0.535397	0.345257	0.152926	0.473477	0.152926	0.188378	1.56923	NA	0.01032	0.00415	0.0144333	0.0102833	0.788825	1.46e-11	FALSE	yes	0.129167	FALSE	yes	NA	NA
ENST00000509839.5	ENSG00000113494.16	PRLR	protein_coding	protein_coding	33.2001	34.4853	32.3433	2.20678	0.822242	-0.0924884	0.535397	0.864584	1.4198	0.494439	0.537654	0.350176	-1.50306	NA	0.02512	0.0403	0.015	-0.0253	0.815646	1.46e-11	FALSE	yes	0.10501	FALSE	yes	NA	NA
ENST00000618457.4	ENSG00000113494.16	PRLR	protein_coding	protein_coding	33.2001	34.4853	32.3433	2.20678	0.822242	-0.0924884	0.535397	21.9692	23.2071	21.1439	0.221185	0.646887	-0.134261	0.183862	0.6631	0.6753	0.654967	-0.0203333	0.959638	1.46e-11	FALSE	yes	1	TRUE	yes	NA	NA
ENST00000619676.4	ENSG00000113494.16	PRLR	protein_coding	protein_coding	33.2001	34.4853	32.3433	2.20678	0.822242	-0.0924884	0.535397	0.931728	1.10107	0.818834	1.10107	0.51737	-0.422793	NA	0.02728	0.03	0.0254667	-0.00453333	0.965397	1.46e-11	FALSE	yes	1	TRUE	yes	NA	NA
ENST00000509934.1	ENSG00000113494.16	PRLR	protein_coding	processed_transcript	33.2001	34.4853	32.3433	2.20678	0.822242	-0.0924884	0.535397	2.23952	1.72097	2.58522	1.50688	1.55649	0.584273	NA	0.06868	0.0529	0.0792	0.0263	0.97063	1.46e-11	NA	NA	0.904416	TRUE	NA	NA	NA
ENST00000515839.1	ENSG00000113494.16	PRLR	protein_coding	protein_coding	33.2001	34.4853	32.3433	2.20678	0.822242	-0.0924884	0.535397	3.50249	3.63392	3.41487	0.566455	0.62412	-0.0894392	NA	0.10488	0.10475	0.104967	0.000216667	0.980958	1.46e-11	FALSE	no	0.0538996	FALSE	yes	NA	NA
ENST00000541593.5	ENSG00000183889.12	AC138969.1	protein_coding	protein_coding	74.9812	70.2535	78.133	7.6761	3.17914	0.153341	0.353966	3.19393	5.64323	1.56106	0.912716	0.295213	-1.84734	NA	0.0438	0.07985	0.0197667	-0.0600833	1.63e-11	1.63e-11	FALSE	yes	0.988957	TRUE	no	NA	NA
ENST00000487862.5	ENSG00000087460.24	GNAS	protein_coding	retained_intron	2898.78	2770.6	2984.24	23.4549	30.6624	0.107166	0.0940926	46.1998	53.9598	41.0265	0.252106	1.39522	-0.395244	1.51e-05	0.01602	0.01945	0.0137333	-0.00571667	1.63e-11	1.63e-11	NA	NA	1	TRUE	NA	NA	NA
ENST00000488546.5	ENSG00000087460.24	GNAS	protein_coding	processed_transcript	2898.78	2770.6	2984.24	23.4549	30.6624	0.107166	0.0940926	83.649	37.6195	114.335	3.44632	16.8722	1.60346	2.01e-11	0.02836	0.01355	0.0382333	0.0246833	8.12e-06	1.63e-11	NA	NA	0.494163	NA	NA	NA	NA
ENST00000476196.5	ENSG00000087460.24	GNAS	protein_coding	retained_intron	2898.78	2770.6	2984.24	23.4549	30.6624	0.107166	0.0940926	29.3404	33.056	26.8634	1.25751	1.56818	-0.299169	0.0700484	0.0102	0.01195	0.00903333	-0.00291667	0.10012	1.63e-11	NA	NA	1	TRUE	NA	NA	NA
ENST00000331436.6	ENSG00000183889.12	AC138969.1	protein_coding	protein_coding	74.9812	70.2535	78.133	7.6761	3.17914	0.153341	0.353966	9.36404	6.53233	11.2518	2.16884	0.996997	0.783567	0.331302	0.1224	0.0907	0.143533	0.0528333	0.221764	1.63e-11	FALSE	yes	0.984532	TRUE	no	NA	NA
ENST00000475610.1	ENSG00000087460.24	GNAS	protein_coding	retained_intron	2898.78	2770.6	2984.24	23.4549	30.6624	0.107166	0.0940926	32.6882	26.5779	36.7617	3.7423	0.215449	0.467829	0.132612	0.01124	0.0096	0.0123333	0.00273333	0.264428	1.63e-11	NA	NA	0.0265434	FALSE	NA	NA	NA
ENST00000538085.5	ENSG00000183889.12	AC138969.1	protein_coding	processed_transcript	74.9812	70.2535	78.133	7.6761	3.17914	0.153341	0.353966	8.01027	9.38889	7.09118	0.316822	0.851531	-0.404431	0.540134	0.10846	0.13575	0.0902667	-0.0454833	0.265015	1.63e-11	NA	NA	0.0211521	FALSE	NA	NA	NA
ENST00000371095.7	ENSG00000087460.24	GNAS	protein_coding	protein_coding	2898.78	2770.6	2984.24	23.4549	30.6624	0.107166	0.0940926	608.067	598.858	614.207	15.018	9.05381	0.0365091	0.76105	0.20992	0.2161	0.2058	-0.0103	0.30798	1.63e-11	FALSE	yes	1	TRUE	no	NA	NA
ENST00000527703.2	ENSG00000183889.12	AC138969.1	protein_coding	protein_coding	74.9812	70.2535	78.133	7.6761	3.17914	0.153341	0.353966	6.63128	3.37078	8.80495	2.46342	0.922585	1.3826	NA	0.08572	0.0447	0.113067	0.0683667	0.429368	1.63e-11	FALSE	yes	0.231439	FALSE	no	NA	NA
ENST00000534258.1	ENSG00000183889.12	AC138969.1	protein_coding	retained_intron	74.9812	70.2535	78.133	7.6761	3.17914	0.153341	0.353966	3.26866	5.12722	2.02962	2.76197	0.584127	-1.33269	NA	0.04328	0.0695	0.0258	-0.0437	0.471802	1.63e-11	NA	NA	0.0254732	FALSE	NA	NA	NA
ENST00000283050.7	ENSG00000183889.12	AC138969.1	protein_coding	retained_intron	74.9812	70.2535	78.133	7.6761	3.17914	0.153341	0.353966	3.38824	2.40665	4.04263	0.682457	0.723921	0.745848	NA	0.0452	0.03575	0.0515	0.01575	0.88165	1.63e-11	NA	NA	0.0597709	FALSE	NA	NA	NA
ENST00000487981.5	ENSG00000087460.24	GNAS	protein_coding	retained_intron	2898.78	2770.6	2984.24	23.4549	30.6624	0.107166	0.0940926	85.7384	79.7166	89.7528	2.03768	1.54908	0.171056	0.279642	0.02958	0.0288	0.0301	0.0013	0.907871	1.63e-11	NA	NA	0.864513	TRUE	NA	NA	NA
ENST00000381497.6	ENSG00000183889.12	AC138969.1	protein_coding	protein_coding	74.9812	70.2535	78.133	7.6761	3.17914	0.153341	0.353966	4.67668	2.6966	5.99674	2.6966	2.41458	1.1501	0.879809	0.06332	0.0431	0.0768	0.0337	0.917362	1.63e-11	FALSE	yes	0.999963	TRUE	no	NA	NA
ENST00000537112.5	ENSG00000183889.12	AC138969.1	protein_coding	processed_transcript	74.9812	70.2535	78.133	7.6761	3.17914	0.153341	0.353966	15.855	15.1274	16.3401	1.2825	0.42552	0.111178	0.587234	0.21212	0.2159	0.2096	-0.0063	0.939081	1.63e-11	NA	NA	1	TRUE	NA	NA	NA
ENST00000371085.7	ENSG00000087460.24	GNAS	protein_coding	protein_coding	2898.78	2770.6	2984.24	23.4549	30.6624	0.107166	0.0940926	277.392	262.346	287.423	2.65445	9.91777	0.131699	0.201183	0.09562	0.09465	0.0962667	0.00161667	0.959638	1.63e-11	FALSE	yes	1	TRUE	no	NA	NA
ENST00000477931.5	ENSG00000087460.24	GNAS	protein_coding	processed_transcript	2898.78	2770.6	2984.24	23.4549	30.6624	0.107166	0.0940926	260.261	257.354	262.199	19.2788	13.4166	0.0269086	0.927284	0.08992	0.09295	0.0879	-0.00505	0.959638	1.63e-11	NA	NA	1	TRUE	NA	NA	NA
ENST00000480975.5	ENSG00000087460.24	GNAS	protein_coding	processed_transcript	2898.78	2770.6	2984.24	23.4549	30.6624	0.107166	0.0940926	985.419	951.042	1008.34	25.3504	10.8746	0.0843961	0.277325	0.34008	0.34325	0.337967	-0.00528333	0.959638	1.63e-11	NA	NA	1	TRUE	NA	NA	NA
ENST00000524823.6	ENSG00000183889.12	AC138969.1	protein_coding	protein_coding	74.9812	70.2535	78.133	7.6761	3.17914	0.153341	0.353966	5.07658	5.17908	5.00824	2.00841	0.935488	-0.0482956	0.980318	0.0668	0.07145	0.0637	-0.00775	0.959638	1.63e-11	NA	no	0.928208	TRUE	no	NA	NA
ENST00000540039.5	ENSG00000183889.12	AC138969.1	protein_coding	processed_transcript	74.9812	70.2535	78.133	7.6761	3.17914	0.153341	0.353966	8.72687	7.5332	9.52265	0.235448	0.631273	0.3377	0.613104	0.11726	0.10885	0.122867	0.0140167	0.959638	1.63e-11	NA	NA	0.113867	FALSE	NA	NA	NA
ENST00000536260.5	ENSG00000183889.12	AC138969.1	protein_coding	processed_transcript	74.9812	70.2535	78.133	7.6761	3.17914	0.153341	0.353966	5.79356	5.48463	5.9995	0.540022	0.391984	0.129222	0.775427	0.07754	0.07815	0.0771333	-0.00101667	0.963714	1.63e-11	NA	NA	1	TRUE	NA	NA	NA
ENST00000493958.5	ENSG00000087460.24	GNAS	protein_coding	processed_transcript	2898.78	2770.6	2984.24	23.4549	30.6624	0.107166	0.0940926	84.7905	81.4531	87.0155	1.82952	0.790925	0.095292	0.630732	0.02924	0.0294	0.0291333	-0.000266667	0.969617	1.63e-11	NA	NA	0.916038	TRUE	NA	NA	NA
ENST00000354359.11	ENSG00000087460.24	GNAS	protein_coding	protein_coding	2898.78	2770.6	2984.24	23.4549	30.6624	0.107166	0.0940926	65.0041	62.4098	66.7336	5.766	2.55683	0.0966252	0.689212	0.02242	0.02255	0.0223333	-0.000216667	0.991533	1.63e-11	FALSE	yes	1	TRUE	no	NA	NA
ENST00000265620.11	ENSG00000087460.24	GNAS	protein_coding	protein_coding	2898.78	2770.6	2984.24	23.4549	30.6624	0.107166	0.0940926	275.968	263.562	284.238	0.000991479	5.24264	0.108951	0.0818272	0.09522	0.0951	0.0953	0.0002	0.998155	1.63e-11	FALSE	yes	1	TRUE	no	NA	NA
ENST00000592305.5	ENSG00000065717.14	TLE2	protein_coding	retained_intron	25.0987	25.4898	24.838	0.603646	1.21744	-0.0373603	0.921539	0.74911	1.84761	0.0167798	0.277564	0.0167798	-6.11616	NA	0.02934	0.07225	0.000733333	-0.0715167	1.7e-11	1.7e-11	NA	NA	0.950716	TRUE	NA	NA	NA
ENST00000590101.5	ENSG00000065717.14	TLE2	protein_coding	retained_intron	25.0987	25.4898	24.838	0.603646	1.21744	-0.0373603	0.921539	2.62462	1.40016	3.44092	0.00676551	0.468779	1.29113	NA	0.10544	0.05495	0.1391	0.08415	0.00342396	1.7e-11	NA	NA	0.611835	TRUE	NA	NA	NA
ENST00000426948.6	ENSG00000065717.14	TLE2	protein_coding	protein_coding	25.0987	25.4898	24.838	0.603646	1.21744	-0.0373603	0.921539	1.90347	1.61713	2.09436	0.0368933	0.0857247	0.371051	0.472303	0.07618	0.06345	0.0846667	0.0212167	0.603232	1.7e-11	FALSE	yes	1	TRUE	no	NA	NA
ENST00000587672.5	ENSG00000065717.14	TLE2	protein_coding	retained_intron	25.0987	25.4898	24.838	0.603646	1.21744	-0.0373603	0.921539	1.03173	0.746817	1.22168	0.746817	0.276701	0.702607	NA	0.04072	0.0286	0.0488	0.0202	0.883374	1.7e-11	NA	NA	0.0477964	FALSE	NA	NA	NA
ENST00000455444.6	ENSG00000065717.14	TLE2	protein_coding	protein_coding	25.0987	25.4898	24.838	0.603646	1.21744	-0.0373603	0.921539	3.67324	4.45026	3.15522	1.52427	0.572966	-0.494822	0.600869	0.14468	0.1733	0.1256	-0.0477	0.913081	1.7e-11	FALSE	yes	1	TRUE	no	NA	NA
ENST00000262953.10	ENSG00000065717.14	TLE2	protein_coding	protein_coding	25.0987	25.4898	24.838	0.603646	1.21744	-0.0373603	0.921539	11.6708	11.0367	12.0935	2.11497	0.362332	0.131814	0.809874	0.467	0.4352	0.4882	0.053	0.942545	1.7e-11	FALSE	yes	1	TRUE	no	NA	NA
ENST00000589205.5	ENSG00000065717.14	TLE2	protein_coding	processed_transcript	25.0987	25.4898	24.838	0.603646	1.21744	-0.0373603	0.921539	0.472645	1.10107	0.0536954	1.10107	0.0536954	-4.12462	NA	0.01912	0.04425	0.00236667	-0.0418833	0.959638	1.7e-11	NA	NA	0.0659842	FALSE	NA	NA	NA
ENST00000590536.5	ENSG00000065717.14	TLE2	protein_coding	protein_coding	25.0987	25.4898	24.838	0.603646	1.21744	-0.0373603	0.921539	1.30884	1.05273	1.47959	1.03234	0.740083	0.487136	0.960872	0.0521	0.04035	0.0599333	0.0195833	0.959638	1.7e-11	FALSE	yes	1	TRUE	no	NA	NA
ENST00000587137.5	ENSG00000065717.14	TLE2	protein_coding	protein_coding	25.0987	25.4898	24.838	0.603646	1.21744	-0.0373603	0.921539	0.529767	0.581414	0.495336	0.581414	0.367886	-0.226927	NA	0.0203	0.0223	0.0189667	-0.00333333	0.971105	1.7e-11	FALSE	yes	0.100564	FALSE	no	NA	NA
ENST00000592584.1	ENSG00000065717.14	TLE2	protein_coding	protein_coding	25.0987	25.4898	24.838	0.603646	1.21744	-0.0373603	0.921539	0.677215	1.01441	0.452419	1.01441	0.363388	-1.14752	NA	0.02716	0.04075	0.0181	-0.02265	0.992693	1.7e-11	FALSE	yes	0.157419	FALSE	no	NA	NA
ENST00000299335.7	ENSG00000166260.11	COX11	protein_coding	protein_coding	61.9502	62.6104	61.51	1.23113	1.74897	-0.0255778	0.938055	28.6801	34.0055	25.1298	0.453871	0.480077	-0.43622	3.34e-08	0.46266	0.5432	0.408967	-0.134233	1.93e-11	1.93e-11	FALSE	yes	0.999166	TRUE	no	0	TRUE
ENST00000639671.1	ENSG00000166260.11	COX11	protein_coding	protein_coding	61.9502	62.6104	61.51	1.23113	1.74897	-0.0255778	0.938055	12.0672	7.55514	15.0753	1.35654	2.55633	0.995703	0.0641576	0.19452	0.12115	0.243433	0.122283	0.14346	1.93e-11	FALSE	yes	0.991769	TRUE	no	0	TRUE
ENST00000576370.5	ENSG00000166260.11	COX11	protein_coding	nonsense_mediated_decay	61.9502	62.6104	61.51	1.23113	1.74897	-0.0255778	0.938055	4.29568	2.80264	5.29104	0.88798	0.639884	0.914352	0.0778653	0.06968	0.0445	0.0864667	0.0419667	0.342072	1.93e-11	TRUE	yes	0.994664	TRUE	no	1	TRUE
ENST00000572088.1	ENSG00000166260.11	COX11	protein_coding	retained_intron	61.9502	62.6104	61.51	1.23113	1.74897	-0.0255778	0.938055	1.3989	1.22328	1.51598	0.0103268	0.0552907	0.307236	0.565193	0.02264	0.01955	0.0247	0.00515	0.791947	1.93e-11	NA	NA	0.832378	TRUE	NA	0	TRUE
ENST00000571584.1	ENSG00000166260.11	COX11	protein_coding	protein_coding	61.9502	62.6104	61.51	1.23113	1.74897	-0.0255778	0.938055	9.3463	10.3779	8.65858	0.714368	0.90569	-0.261034	0.6221	0.15122	0.16555	0.141667	-0.0238833	0.898172	1.93e-11	FALSE	yes	0.982642	TRUE	no	0	TRUE
ENST00000574989.1	ENSG00000166260.11	COX11	protein_coding	processed_transcript	61.9502	62.6104	61.51	1.23113	1.74897	-0.0255778	0.938055	4.20695	4.62781	3.92639	0.347392	0.581192	-0.23657	NA	0.0678	0.0738	0.0638	-0.01	0.934532	1.93e-11	NA	NA	0.0245251	FALSE	NA	0	TRUE
ENST00000572558.5	ENSG00000166260.11	COX11	protein_coding	nonsense_mediated_decay	61.9502	62.6104	61.51	1.23113	1.74897	-0.0255778	0.938055	1.09083	0.992461	1.15641	0.210559	0.251126	0.218528	NA	0.01746	0.01575	0.0186	0.00285	0.959638	1.93e-11	TRUE	yes	0.997758	TRUE	no	1	TRUE
ENST00000340882.2	ENSG00000110400.10	NECTIN1	protein_coding	protein_coding	9.39429	9.0582	9.61835	1.25922	0.802946	0.0864728	0.763888	1.0144	0	1.69067	0	0.413731	7.40996	NA	0.10276	0	0.171267	0.171267	2.27e-11	2.27e-11	FALSE	yes	0.999999	TRUE	yes	0	TRUE
ENST00000532197.1	ENSG00000110400.10	NECTIN1	protein_coding	retained_intron	9.39429	9.0582	9.61835	1.25922	0.802946	0.0864728	0.763888	0.101533	0	0.169221	0	0.0890702	4.16367	NA	0.0102	0	0.017	0.017	0.568106	2.27e-11	NA	NA	0.0423115	FALSE	NA	0	TRUE
ENST00000264025.7	ENSG00000110400.10	NECTIN1	protein_coding	protein_coding	9.39429	9.0582	9.61835	1.25922	0.802946	0.0864728	0.763888	7.54383	7.99876	7.24054	0.300032	0.236628	-0.143491	0.45503	0.81392	0.8957	0.7594	-0.1363	0.656209	2.27e-11	FALSE	yes	1	TRUE	yes	0	TRUE
ENST00000524429.2	ENSG00000110400.10	NECTIN1	protein_coding	retained_intron	9.39429	9.0582	9.61835	1.25922	0.802946	0.0864728	0.763888	0.293407	0.223438	0.340054	0.123194	0.0552097	0.584535	NA	0.0312	0.02325	0.0365	0.01325	0.924882	2.27e-11	NA	NA	0.253048	NA	NA	0	TRUE
ENST00000524510.1	ENSG00000110400.10	NECTIN1	protein_coding	processed_transcript	9.39429	9.0582	9.61835	1.25922	0.802946	0.0864728	0.763888	0.441118	0.835996	0.177866	0.835996	0.177866	-2.17095	NA	0.04196	0.08105	0.0159	-0.06515	0.959638	2.27e-11	NA	NA	0.999941	TRUE	NA	0	TRUE
ENST00000466371.5	ENSG00000068438.14	FTSJ1	protein_coding	processed_transcript	27.9273	28.9415	27.2512	0.52232	1.00434	-0.0867889	0.768519	1.39591	0.137634	2.23477	0.137634	0.202237	3.92647	NA	0.05098	0.00465	0.0818667	0.0772167	2.95e-11	2.95e-11	NA	NA	0.999245	TRUE	NA	NA	NA
ENST00000467954.5	ENSG00000068438.14	FTSJ1	protein_coding	processed_transcript	27.9273	28.9415	27.2512	0.52232	1.00434	-0.0867889	0.768519	2.63442	3.43797	2.09872	0.491591	0.288199	-0.709376	NA	0.09352	0.11915	0.0764333	-0.0427167	0.422742	2.95e-11	NA	NA	0.00919427	FALSE	NA	NA	NA
ENST00000496365.5	ENSG00000068438.14	FTSJ1	protein_coding	processed_transcript	27.9273	28.9415	27.2512	0.52232	1.00434	-0.0867889	0.768519	3.89669	5.21323	3.019	0.241135	0.847281	-0.786102	0.337437	0.13972	0.18005	0.112833	-0.0672167	0.680461	2.95e-11	NA	NA	0.998927	TRUE	NA	NA	NA
ENST00000348411.2	ENSG00000068438.14	FTSJ1	protein_coding	protein_coding	27.9273	28.9415	27.2512	0.52232	1.00434	-0.0867889	0.768519	16.7543	16.7685	16.7449	0.318466	1.18531	-0.00203301	0.994613	0.59954	0.57935	0.613	0.03365	0.841963	2.95e-11	FALSE	yes	1	TRUE	no	NA	NA
ENST00000487353.5	ENSG00000068438.14	FTSJ1	protein_coding	processed_transcript	27.9273	28.9415	27.2512	0.52232	1.00434	-0.0867889	0.768519	1.07241	1.09595	1.05672	0.494484	0.148699	-0.0520986	NA	0.03824	0.0376	0.0386667	0.00106667	0.978963	2.95e-11	NA	NA	0.0302034	FALSE	NA	NA	NA
ENST00000490202.5	ENSG00000068438.14	FTSJ1	protein_coding	processed_transcript	27.9273	28.9415	27.2512	0.52232	1.00434	-0.0867889	0.768519	1.41645	1.43575	1.40358	0.0323385	0.173364	-0.0324649	NA	0.05064	0.0496	0.0513333	0.00173333	0.989497	2.95e-11	NA	NA	0.397245	NA	NA	NA	NA
ENST00000575909.1	ENSG00000141198.15	TOM1L1	protein_coding	protein_coding	86.2766	86.2025	86.3259	2.14803	1.9992	0.00206396	0.966303	1.66329	4.15822	0	1.602	0	-8.70329	NA	0.01912	0.0478	0	-0.0478	3e-11	3e-11	FALSE	yes	0.413486	NA	no	NA	NA
ENST00000570965.5	ENSG00000141198.15	TOM1L1	protein_coding	nonsense_mediated_decay	86.2766	86.2025	86.3259	2.14803	1.9992	0.00206396	0.966303	5.42266	3.92121	6.42362	0.128642	0.634873	0.710657	0.0949879	0.06276	0.04555	0.0742333	0.0286833	0.0206077	3e-11	TRUE	no	0.5	TRUE	no	NA	NA
ENST00000572158.5	ENSG00000141198.15	TOM1L1	protein_coding	protein_coding	86.2766	86.2025	86.3259	2.14803	1.9992	0.00206396	0.966303	2.53673	0.830899	3.67394	0.830899	0.158078	2.13125	0.616975	0.02928	0.0094	0.0425333	0.0331333	0.556183	3e-11	FALSE	yes	1	TRUE	no	NA	NA
ENST00000575882.5	ENSG00000141198.15	TOM1L1	protein_coding	protein_coding	86.2766	86.2025	86.3259	2.14803	1.9992	0.00206396	0.966303	5.60716	6.55701	4.97392	1.04147	0.245582	-0.397956	0.262225	0.06524	0.0764	0.0578	-0.0186	0.698652	3e-11	FALSE	yes	1	TRUE	no	NA	NA
ENST00000348161.8	ENSG00000141198.15	TOM1L1	protein_coding	protein_coding	86.2766	86.2025	86.3259	2.14803	1.9992	0.00206396	0.966303	18.5916	15.8351	20.4293	2.4795	2.11296	0.367314	0.305236	0.216	0.18455	0.236967	0.0524167	0.7332	3e-11	FALSE	yes	1	TRUE	no	NA	NA
ENST00000572405.5	ENSG00000141198.15	TOM1L1	protein_coding	protein_coding	86.2766	86.2025	86.3259	2.14803	1.9992	0.00206396	0.966303	0.93156	1.12659	0.801537	0.0663069	0.207963	-0.485989	NA	0.01078	0.0131	0.00923333	-0.00386667	0.906272	3e-11	FALSE	yes	0.998467	TRUE	no	NA	NA
ENST00000445275.6	ENSG00000141198.15	TOM1L1	protein_coding	protein_coding	86.2766	86.2025	86.3259	2.14803	1.9992	0.00206396	0.966303	18.0669	18.6302	17.6914	1.2782	0.966957	-0.0745579	0.845437	0.20976	0.21665	0.205167	-0.0114833	0.959638	3e-11	FALSE	yes	1	TRUE	no	NA	NA
ENST00000536554.5	ENSG00000141198.15	TOM1L1	protein_coding	protein_coding	86.2766	86.2025	86.3259	2.14803	1.9992	0.00206396	0.966303	15.2098	16.881	14.0957	5.26272	3.66425	-0.259978	0.903867	0.17542	0.1944	0.162767	-0.0316333	0.959638	3e-11	FALSE	yes	1	TRUE	no	NA	NA
ENST00000570977.1	ENSG00000141198.15	TOM1L1	protein_coding	retained_intron	86.2766	86.2025	86.3259	2.14803	1.9992	0.00206396	0.966303	1.83687	1.76545	1.88448	0.429893	0.14364	0.09362	NA	0.02138	0.0206	0.0219	0.0013	0.959638	3e-11	NA	NA	0.352497	NA	NA	NA	NA
ENST00000575333.5	ENSG00000141198.15	TOM1L1	protein_coding	protein_coding	86.2766	86.2025	86.3259	2.14803	1.9992	0.00206396	0.966303	11.9317	12.2086	11.7471	0.36195	0.259737	-0.0555481	0.900969	0.13852	0.14185	0.1363	-0.00555	0.959638	3e-11	FALSE	yes	1	TRUE	no	NA	NA
ENST00000572905.1	ENSG00000141198.15	TOM1L1	protein_coding	retained_intron	86.2766	86.2025	86.3259	2.14803	1.9992	0.00206396	0.966303	1.97006	2.0373	1.92523	0.559015	0.677842	-0.0812166	NA	0.02302	0.0238	0.0225	-0.0013	0.964874	3e-11	NA	NA	0.0125885	FALSE	NA	NA	NA
ENST00000497993.5	ENSG00000176142.12	TMEM39A	protein_coding	protein_coding	17.6015	17.5013	17.6682	0.309489	0.618857	0.013687	0.953581	0.889837	0	1.48306	0	0.244772	7.22213	NA	0.05022	0	0.0837	0.0837	3.2e-11	3.2e-11	FALSE	yes	0.156941	FALSE	no	NA	NA
ENST00000491685.5	ENSG00000176142.12	TMEM39A	protein_coding	protein_coding	17.6015	17.5013	17.6682	0.309489	0.618857	0.013687	0.953581	1.37427	1.89041	1.03018	0.595636	0.301027	-0.869483	NA	0.07794	0.10865	0.0574667	-0.0511833	0.731941	3.2e-11	FALSE	yes	0.14114	FALSE	no	NA	NA
ENST00000486235.5	ENSG00000176142.12	TMEM39A	protein_coding	retained_intron	17.6015	17.5013	17.6682	0.309489	0.618857	0.013687	0.953581	0.687767	0.879035	0.560255	0.0532333	0.143636	-0.640632	NA	0.03932	0.0503	0.032	-0.0183	0.773504	3.2e-11	NA	NA	0.174262	FALSE	NA	NA	NA
ENST00000468676.5	ENSG00000176142.12	TMEM39A	protein_coding	protein_coding	17.6015	17.5013	17.6682	0.309489	0.618857	0.013687	0.953581	3.30991	2.94663	3.55209	0.580871	0.121068	0.268774	0.816364	0.1881	0.16785	0.2016	0.03375	0.939081	3.2e-11	FALSE	yes	0.186452	FALSE	no	NA	NA
ENST00000490099.5	ENSG00000176142.12	TMEM39A	protein_coding	nonsense_mediated_decay	17.6015	17.5013	17.6682	0.309489	0.618857	0.013687	0.953581	1.05062	1.09433	1.02148	0.3024	0.812953	-0.09845	NA	0.05938	0.06225	0.0574667	-0.00478333	0.954732	3.2e-11	TRUE	no	0.134977	FALSE	no	NA	NA
ENST00000319172.9	ENSG00000176142.12	TMEM39A	protein_coding	protein_coding	17.6015	17.5013	17.6682	0.309489	0.618857	0.013687	0.953581	7.56948	7.63479	7.52595	0.304527	0.133104	-0.0206875	0.962325	0.43108	0.4367	0.427333	-0.00936667	0.959638	3.2e-11	FALSE	yes	1	TRUE	no	NA	NA
ENST00000461654.1	ENSG00000176142.12	TMEM39A	protein_coding	protein_coding	17.6015	17.5013	17.6682	0.309489	0.618857	0.013687	0.953581	0.705191	0.743193	0.679857	0.0214375	0.35703	-0.126723	NA	0.03956	0.04245	0.0376333	-0.00481667	0.959638	3.2e-11	FALSE	yes	0.138257	FALSE	no	NA	NA
ENST00000486159.5	ENSG00000176142.12	TMEM39A	protein_coding	processed_transcript	17.6015	17.5013	17.6682	0.309489	0.618857	0.013687	0.953581	0.270146	0.468974	0.137594	0.468974	0.137594	-1.69831	NA	0.01522	0.02635	0.0078	-0.01855	0.959638	3.2e-11	NA	NA	0.447648	NA	NA	NA	NA
ENST00000468545.1	ENSG00000176142.12	TMEM39A	protein_coding	retained_intron	17.6015	17.5013	17.6682	0.309489	0.618857	0.013687	0.953581	1.35212	1.16786	1.47495	0.566355	0.740118	0.334243	NA	0.07732	0.06735	0.0839667	0.0166167	0.9782	3.2e-11	NA	NA	0.0524341	FALSE	NA	NA	NA
ENST00000594509.5	ENSG00000268790.5	AC008764.4	protein_coding	nonsense_mediated_decay	6.94124	4.08712	8.84398	0.233386	2.28129	1.11171	NA	6.74349	3.59277	8.84398	0.116251	2.28129	1.29722	NA	0.95212	0.8803	1	0.1197	3.79e-11	3.79e-11	TRUE	no	0.0568626	FALSE	no	0	NA
ENST00000593991.5	ENSG00000268790.5	AC008764.4	protein_coding	nonsense_mediated_decay	6.94124	4.08712	8.84398	0.233386	2.28129	1.11171	NA	0.0754436	0.188609	0	0.188609	0	-4.31186	NA	0.01958	0.04895	0	-0.04895	0.870089	3.79e-11	TRUE	no	0.136804	FALSE	no	0	NA
ENST00000593962.5	ENSG00000268790.5	AC008764.4	protein_coding	processed_transcript	6.94124	4.08712	8.84398	0.233386	2.28129	1.11171	NA	0.122298	0.305744	0	0.305744	0	-4.98068	NA	0.0283	0.07075	0	-0.07075	0.89188	3.79e-11	NA	NA	0.099979	FALSE	NA	0	NA
ENST00000571482.2	ENSG00000141560.14	FN3KRP	protein_coding	retained_intron	24.8261	27.0021	23.3755	0.106642	0.618237	-0.20799	0.2739	0.51337	1.28342	0	0.0498195	0	-7.01505	NA	0.01902	0.04755	0	-0.04755	3.86e-11	3.86e-11	NA	NA	0.0562754	FALSE	NA	NA	NA
ENST00000576363.1	ENSG00000141560.14	FN3KRP	protein_coding	retained_intron	24.8261	27.0021	23.3755	0.106642	0.618237	-0.20799	0.2739	0.764483	0.407439	1.00251	0.234122	0.0846371	1.2783	NA	0.03192	0.01515	0.0431	0.02795	0.294412	3.86e-11	NA	NA	0.0652628	FALSE	NA	NA	NA
ENST00000269373.10	ENSG00000141560.14	FN3KRP	protein_coding	protein_coding	24.8261	27.0021	23.3755	0.106642	0.618237	-0.20799	0.2739	22.9087	24.5753	21.7976	0.637096	0.381947	-0.172965	0.242508	0.92378	0.91	0.932967	0.0229667	0.498259	3.86e-11	FALSE	yes	0.999941	TRUE	no	NA	NA
ENST00000274289.7	ENSG00000145632.14	PLK2	protein_coding	protein_coding	393.874	407.568	384.745	6.8402	13.1022	-0.0831367	0.526539	242.069	236.534	245.759	3.75017	7.95395	0.0551939	0.697019	0.61546	0.58035	0.638867	0.0585167	4.33e-11	4.33e-11	FALSE	yes	1	TRUE	no	NA	NA
ENST00000503378.1	ENSG00000145632.14	PLK2	protein_coding	retained_intron	393.874	407.568	384.745	6.8402	13.1022	-0.0831367	0.526539	44.1445	35.0663	50.1967	4.40972	5.44273	0.517383	0.12722	0.11224	0.0859	0.1298	0.0439	0.063034	4.33e-11	NA	NA	0.157158	FALSE	NA	NA	NA
ENST00000617412.1	ENSG00000145632.14	PLK2	protein_coding	protein_coding	393.874	407.568	384.745	6.8402	13.1022	-0.0831367	0.526539	32.3795	56.1049	16.5625	2.38424	5.00646	-1.7596	0.0737903	0.08138	0.1378	0.0437667	-0.0940333	0.131488	4.33e-11	FALSE	yes	1	TRUE	no	NA	NA
ENST00000503115.5	ENSG00000145632.14	PLK2	protein_coding	retained_intron	393.874	407.568	384.745	6.8402	13.1022	-0.0831367	0.526539	6.92422	8.86178	5.63252	1.34349	0.240597	-0.652885	0.305277	0.0175	0.0218	0.0146333	-0.00716667	0.192133	4.33e-11	NA	NA	0.11367	FALSE	NA	NA	NA
ENST00000511326.1	ENSG00000145632.14	PLK2	protein_coding	retained_intron	393.874	407.568	384.745	6.8402	13.1022	-0.0831367	0.526539	7.93638	7.1951	8.43057	0.899788	1.20085	0.228321	NA	0.02014	0.0177	0.0217667	0.00406667	0.867513	4.33e-11	NA	NA	0.0152037	FALSE	NA	NA	NA
ENST00000509555.5	ENSG00000145632.14	PLK2	protein_coding	retained_intron	393.874	407.568	384.745	6.8402	13.1022	-0.0831367	0.526539	7.86415	9.78609	6.58286	1.13047	1.83083	-0.571302	0.650102	0.01984	0.02395	0.0171	-0.00685	0.877736	4.33e-11	NA	NA	0.118185	FALSE	NA	NA	NA
ENST00000510629.1	ENSG00000145632.14	PLK2	protein_coding	retained_intron	393.874	407.568	384.745	6.8402	13.1022	-0.0831367	0.526539	4.79071	4.64894	4.88523	0.142716	0.324563	0.0713737	NA	0.01218	0.0114	0.0127	0.0013	0.917562	4.33e-11	NA	NA	0.531339	TRUE	NA	NA	NA
ENST00000509422.1	ENSG00000145632.14	PLK2	protein_coding	retained_intron	393.874	407.568	384.745	6.8402	13.1022	-0.0831367	0.526539	3.99774	3.6696	4.2165	0.602138	0.580331	0.199915	NA	0.01016	0.00905	0.0109	0.00185	0.924811	4.33e-11	NA	NA	0.272544	NA	NA	NA	NA
ENST00000503713.1	ENSG00000145632.14	PLK2	protein_coding	retained_intron	393.874	407.568	384.745	6.8402	13.1022	-0.0831367	0.526539	9.71346	10.8805	8.93543	0.817959	0.966211	-0.283848	0.685637	0.02472	0.02665	0.0234333	-0.00321667	0.949901	4.33e-11	NA	NA	0.542151	TRUE	NA	NA	NA
ENST00000514306.1	ENSG00000145632.14	PLK2	protein_coding	retained_intron	393.874	407.568	384.745	6.8402	13.1022	-0.0831367	0.526539	7.73604	7.81395	7.6841	0.636611	0.449103	-0.0241438	0.986902	0.01962	0.01915	0.0199333	0.000783333	0.959638	4.33e-11	NA	NA	0.386039	NA	NA	NA	NA
ENST00000515415.5	ENSG00000145632.14	PLK2	protein_coding	retained_intron	393.874	407.568	384.745	6.8402	13.1022	-0.0831367	0.526539	13.6119	14.3805	13.0994	0.055691	0.99492	-0.134517	0.740616	0.03452	0.0353	0.034	-0.0013	0.959638	4.33e-11	NA	NA	0.703382	TRUE	NA	NA	NA
ENST00000505244.1	ENSG00000145632.14	PLK2	protein_coding	retained_intron	393.874	407.568	384.745	6.8402	13.1022	-0.0831367	0.526539	9.7696	10.0916	9.55494	1.46654	0.934094	-0.0787522	0.95304	0.02472	0.0247	0.0247333	3.33e-05	0.987387	4.33e-11	NA	NA	0.105769	FALSE	NA	NA	NA
ENST00000416810.6	ENSG00000128891.15	CCDC32	protein_coding	protein_coding	28.1975	23.6346	31.2395	0.634472	0.964847	0.402326	0.0163731	16.2872	15.7709	16.6314	0.10281	0.422978	0.0765932	0.801857	0.58668	0.6679	0.532533	-0.135367	6.48e-10	5.11e-11	FALSE	yes	0.99661	TRUE	no	0	TRUE
ENST00000560109.1	ENSG00000128891.15	CCDC32	protein_coding	processed_transcript	28.1975	23.6346	31.2395	0.634472	0.964847	0.402326	0.0163731	8.25238	4.12688	11.0027	0.313922	0.603196	1.41255	NA	0.28102	0.1744	0.3521	0.1777	5.11e-11	5.11e-11	NA	NA	0.629457	TRUE	NA	0	TRUE
ENST00000558113.5	ENSG00000128891.15	CCDC32	protein_coding	protein_coding	28.1975	23.6346	31.2395	0.634472	0.964847	0.402326	0.0163731	0.385856	0.647023	0.211745	0.00546212	0.211745	-1.56704	NA	0.01502	0.0274	0.00676667	-0.0206333	0.586794	5.11e-11	FALSE	yes	0.997659	TRUE	no	0	TRUE
ENST00000561011.5	ENSG00000128891.15	CCDC32	protein_coding	protein_coding	28.1975	23.6346	31.2395	0.634472	0.964847	0.402326	0.0163731	1.55577	1.41733	1.64806	0.244472	0.0179004	0.216183	NA	0.05582	0.0603	0.0528333	-0.00746667	0.950513	5.11e-11	FALSE	yes	0.849481	TRUE	no	0	TRUE
ENST00000358005.7	ENSG00000128891.15	CCDC32	protein_coding	protein_coding	28.1975	23.6346	31.2395	0.634472	0.964847	0.402326	0.0163731	0.310287	0.215524	0.373461	0.215524	0.167811	0.765799	NA	0.01076	0.0089	0.012	0.0031	0.959638	5.11e-11	FALSE	yes	0.985807	TRUE	no	0	TRUE
ENST00000558871.1	ENSG00000128891.15	CCDC32	protein_coding	protein_coding	28.1975	23.6346	31.2395	0.634472	0.964847	0.402326	0.0163731	0.811233	0.686352	0.894486	0.125623	0.0763271	0.377282	NA	0.02874	0.02895	0.0286	-0.00035	0.979661	5.11e-11	FALSE	yes	0.964276	TRUE	no	0	TRUE
ENST00000310260.7	ENSG00000173218.14	VANGL1	protein_coding	protein_coding	26.5688	27.1539	26.1788	1.92249	0.739209	-0.0527372	0.828087	8.72896	10.7342	7.39215	1.01054	0.256405	-0.537541	0.00698087	0.32722	0.39465	0.282267	-0.112383	1.05e-05	5.26e-11	FALSE	yes	1	TRUE	no	0	FALSE
ENST00000369509.1	ENSG00000173218.14	VANGL1	protein_coding	protein_coding	26.5688	27.1539	26.1788	1.92249	0.739209	-0.0527372	0.828087	5.39022	2.94714	7.01895	0.641529	0.371251	1.24911	3.2e-05	0.2036	0.1074	0.267733	0.160333	5.26e-11	5.26e-11	FALSE	yes	1	TRUE	no	0	FALSE
ENST00000355485.6	ENSG00000173218.14	VANGL1	protein_coding	protein_coding	26.5688	27.1539	26.1788	1.92249	0.739209	-0.0527372	0.828087	12.4497	13.4725	11.7677	0.270424	0.118072	-0.19503	0.0114483	0.46918	0.49795	0.45	-0.04795	0.607325	5.26e-11	FALSE	yes	1	TRUE	no	0	FALSE
ENST00000557510.5	ENSG00000119655.10	NPC2	protein_coding	protein_coding	125.405	118.878	129.757	4.94102	2.54169	0.126314	0.344554	45.0306	45.5182	44.7055	0.879603	1.11705	-0.0259858	0.943751	0.35998	0.38325	0.344467	-0.0387833	0.0482272	5.27e-11	FALSE	yes	0.970395	TRUE	yes	NA	NA
ENST00000555592.1	ENSG00000119655.10	NPC2	protein_coding	protein_coding	125.405	118.878	129.757	4.94102	2.54169	0.126314	0.344554	2.68914	0	4.48191	0	1.1673	8.81118	NA	0.02072	0	0.0345333	0.0345333	5.27e-11	5.27e-11	FALSE	yes	0.103813	FALSE	yes	NA	NA
ENST00000541064.5	ENSG00000119655.10	NPC2	protein_coding	protein_coding	125.405	118.878	129.757	4.94102	2.54169	0.126314	0.344554	5.89159	5.80188	5.9514	0.0824381	0.333669	0.0366465	0.952209	0.0471	0.0489	0.0459	-0.003	0.959638	5.27e-11	FALSE	yes	0.375347	NA	yes	NA	NA
ENST00000553490.5	ENSG00000119655.10	NPC2	protein_coding	protein_coding	125.405	118.878	129.757	4.94102	2.54169	0.126314	0.344554	24.6769	22.6715	26.0138	2.63272	3.04187	0.198319	0.747028	0.19596	0.19015	0.199833	0.00968333	0.961325	5.27e-11	FALSE	yes	0.271575	NA	yes	NA	NA
ENST00000238633.6	ENSG00000119655.10	NPC2	protein_coding	protein_coding	125.405	118.878	129.757	4.94102	2.54169	0.126314	0.344554	46.4774	44.3182	47.9169	1.83488	1.39694	0.112608	0.67125	0.3711	0.3728	0.369967	-0.00283333	0.977874	5.27e-11	FALSE	yes	0.917669	TRUE	yes	NA	NA
ENST00000610432.4	ENSG00000102158.19	MAGT1	protein_coding	protein_coding	39.4306	38.571	40.0037	0.608666	1.02063	0.0526033	0.693963	37.9245	38.4742	37.558	0.511813	0.446247	-0.0347605	0.816096	0.96278	0.99755	0.9396	-0.05795	5.63e-11	5.63e-11	FALSE	yes	0.996473	TRUE	no	NA	NA
ENST00000476168.1	ENSG00000102158.19	MAGT1	protein_coding	retained_intron	39.4306	38.571	40.0037	0.608666	1.02063	0.0526033	0.693963	1.46743	0	2.44571	0	0.655937	7.94	NA	0.03624	0	0.0604	0.0604	8.85e-09	5.63e-11	NA	NA	0.999896	TRUE	NA	NA	NA
ENST00000491251.1	ENSG00000100330.15	MTMR3	protein_coding	retained_intron	15.0473	13.7807	15.8918	0.247753	0.488464	0.205493	0.0905054	0.798609	0	1.33102	0	0.2141	7.06718	NA	0.04982	0	0.0830333	0.0830333	5.83e-11	5.83e-11	NA	NA	0.0760371	FALSE	NA	NA	NA
ENST00000487907.1	ENSG00000100330.15	MTMR3	protein_coding	processed_transcript	15.0473	13.7807	15.8918	0.247753	0.488464	0.205493	0.0905054	0.347852	0.607864	0.17451	0.156767	0.17451	-1.74359	NA	0.02388	0.0439	0.0105333	-0.0333667	0.631154	5.83e-11	NA	NA	0.0198367	FALSE	NA	NA	NA
ENST00000480776.1	ENSG00000100330.15	MTMR3	protein_coding	retained_intron	15.0473	13.7807	15.8918	0.247753	0.488464	0.205493	0.0905054	0.305729	0.524426	0.159932	0.147208	0.159932	-1.65304	NA	0.02122	0.03825	0.00986667	-0.0283833	0.665783	5.83e-11	NA	NA	0.0215489	FALSE	NA	NA	NA
ENST00000323630.9	ENSG00000100330.15	MTMR3	protein_coding	protein_coding	15.0473	13.7807	15.8918	0.247753	0.488464	0.205493	0.0905054	2.2788	2.45103	2.16398	0.646503	0.435768	-0.178926	0.88939	0.15384	0.17875	0.137233	-0.0415167	0.944265	5.83e-11	FALSE	yes	1	TRUE	no	NA	NA
ENST00000492087.1	ENSG00000100330.15	MTMR3	protein_coding	retained_intron	15.0473	13.7807	15.8918	0.247753	0.488464	0.205493	0.0905054	0.38656	0.259974	0.470951	0.259974	0.210418	0.833066	NA	0.02492	0.01855	0.0291667	0.0106167	0.957278	5.83e-11	NA	NA	0.0667318	FALSE	NA	NA	NA
ENST00000333027.7	ENSG00000100330.15	MTMR3	protein_coding	protein_coding	15.0473	13.7807	15.8918	0.247753	0.488464	0.205493	0.0905054	3.92184	3.74348	4.04075	0.226178	0.0472363	0.10996	0.57704	0.26172	0.272	0.254867	-0.0171333	0.95762	5.83e-11	FALSE	yes	1	TRUE	no	NA	NA
ENST00000415511.1	ENSG00000100330.15	MTMR3	protein_coding	processed_transcript	15.0473	13.7807	15.8918	0.247753	0.488464	0.205493	0.0905054	0.231483	0.155378	0.282219	0.155378	0.152508	0.821283	NA	0.01492	0.0115	0.0172	0.0057	0.959638	5.83e-11	NA	NA	0.0649311	FALSE	NA	NA	NA
ENST00000495098.5	ENSG00000100330.15	MTMR3	protein_coding	processed_transcript	15.0473	13.7807	15.8918	0.247753	0.488464	0.205493	0.0905054	1.28173	1.03085	1.44899	0.0317337	0.338116	0.487203	NA	0.08556	0.07485	0.0927	0.01785	0.959638	5.83e-11	NA	NA	0.0148503	FALSE	NA	NA	NA
ENST00000401950.6	ENSG00000100330.15	MTMR3	protein_coding	protein_coding	15.0473	13.7807	15.8918	0.247753	0.488464	0.205493	0.0905054	5.37274	4.77617	5.77046	1.15737	0.645846	0.272312	0.649176	0.35544	0.3452	0.362267	0.0170667	0.973613	5.83e-11	FALSE	yes	1	TRUE	no	NA	NA
ENST00000437355.6	ENSG00000146733.13	PSPH	protein_coding	nonsense_mediated_decay	16.195	15.6956	16.5279	1.96223	0.900725	0.0744961	0.825336	0.362671	0	0.604452	0	0.0909608	5.94123	NA	0.02182	0	0.0363667	0.0363667	5.04e-06	9.57e-11	TRUE	yes	0.999869	TRUE	no	1	NA
ENST00000472276.1	ENSG00000146733.13	PSPH	protein_coding	retained_intron	16.195	15.6956	16.5279	1.96223	0.900725	0.0744961	0.825336	0.483568	0.0815606	0.751572	0.0815606	0.0275226	3.05618	NA	0.02928	0.0046	0.0457333	0.0411333	0.000174366	9.57e-11	NA	NA	0.0239588	FALSE	NA	0	NA
ENST00000275605.7	ENSG00000146733.13	PSPH	protein_coding	protein_coding	16.195	15.6956	16.5279	1.96223	0.900725	0.0744961	0.825336	1.03449	0	1.72415	0	0.250093	7.43809	NA	0.06356	0	0.105933	0.105933	9.57e-11	9.57e-11	FALSE	yes	0.999534	TRUE	no	2	NA
ENST00000413218.5	ENSG00000146733.13	PSPH	protein_coding	protein_coding	16.195	15.6956	16.5279	1.96223	0.900725	0.0744961	0.825336	0.337818	0.54134	0.202136	0.0601695	0.102449	-1.37795	NA	0.0208	0.03455	0.0116333	-0.0229167	0.549574	9.57e-11	FALSE	no	0.68698	TRUE	no	0	NA
ENST00000395471.7	ENSG00000146733.13	PSPH	protein_coding	protein_coding	16.195	15.6956	16.5279	1.96223	0.900725	0.0744961	0.825336	8.23795	8.46042	8.08963	0.501055	0.727795	-0.0645768	0.923382	0.50988	0.54355	0.487433	-0.0561167	0.729446	9.57e-11	FALSE	yes	0.999534	TRUE	no	2	NA
ENST00000421626.5	ENSG00000146733.13	PSPH	protein_coding	protein_coding	16.195	15.6956	16.5279	1.96223	0.900725	0.0744961	0.825336	2.41744	3.10467	1.95928	1.34038	0.351227	-0.661409	NA	0.14908	0.1901	0.121733	-0.0683667	0.819128	9.57e-11	FALSE	yes	0.178856	FALSE	no	0	NA
ENST00000416592.1	ENSG00000146733.13	PSPH	protein_coding	protein_coding	16.195	15.6956	16.5279	1.96223	0.900725	0.0744961	0.825336	0.971205	1.35995	0.712042	0.564733	0.218364	-0.923967	NA	0.0636	0.09255	0.0443	-0.04825	0.866054	9.57e-11	FALSE	no	0.00672085	FALSE	no	1	NA
ENST00000419984.6	ENSG00000146733.13	PSPH	protein_coding	protein_coding	16.195	15.6956	16.5279	1.96223	0.900725	0.0744961	0.825336	1.41442	1.22661	1.53964	0.404606	0.3658	0.325543	NA	0.08528	0.07615	0.0913667	0.0152167	0.959638	9.57e-11	FALSE	no	0.0186013	FALSE	no	0	NA
ENST00000427797.5	ENSG00000146733.13	PSPH	protein_coding	nonsense_mediated_decay	16.195	15.6956	16.5279	1.96223	0.900725	0.0744961	0.825336	0.694288	0.543877	0.794562	0.238025	0.214832	0.538637	NA	0.04296	0.0371	0.0468667	0.00976667	0.959638	9.57e-11	TRUE	no	0.623045	TRUE	no	0	NA
ENST00000459834.5	ENSG00000146733.13	PSPH	protein_coding	processed_transcript	16.195	15.6956	16.5279	1.96223	0.900725	0.0744961	0.825336	0.180319	0.244682	0.13741	0.244682	0.127744	-0.788859	NA	0.01028	0.01385	0.0079	-0.00595	0.967956	9.57e-11	NA	NA	0.0784109	FALSE	NA	0	NA
ENST00000595765.2	ENSG00000105443.14	CYTH2	protein_coding	protein_coding	51.3049	48.8643	52.9319	0.887633	1.02255	0.115333	0.367504	0.570036	0	0.950059	0	0.0531557	6.58505	NA	0.01076	0	0.0179333	0.0179333	9.63e-11	9.63e-11	FALSE	yes	0.969899	TRUE	no	NA	NA
ENST00000460595.5	ENSG00000105443.14	CYTH2	protein_coding	protein_coding	51.3049	48.8643	52.9319	0.887633	1.02255	0.115333	0.367504	0.936943	0.606243	1.15741	0.0353182	0.351248	0.921742	NA	0.01806	0.01245	0.0218	0.00935	0.835755	9.63e-11	FALSE	yes	0.517796	TRUE	no	NA	NA
ENST00000641098.1	ENSG00000105443.14	CYTH2	protein_coding	protein_coding	51.3049	48.8643	52.9319	0.887633	1.02255	0.115333	0.367504	6.16447	6.36834	6.02856	0.638706	0.177597	-0.0789757	0.891782	0.1206	0.13065	0.1139	-0.01675	0.87459	9.63e-11	FALSE	yes	1	TRUE	no	NA	NA
ENST00000474049.1	ENSG00000105443.14	CYTH2	protein_coding	retained_intron	51.3049	48.8643	52.9319	0.887633	1.02255	0.115333	0.367504	3.46954	3.18804	3.6572	0.160103	0.495444	0.197491	NA	0.06746	0.06535	0.0688667	0.00351667	0.960166	9.63e-11	NA	NA	0.0936605	FALSE	NA	NA	NA
ENST00000452733.6	ENSG00000105443.14	CYTH2	protein_coding	protein_coding	51.3049	48.8643	52.9319	0.887633	1.02255	0.115333	0.367504	6.08299	5.92046	6.19135	0.404925	0.11826	0.0644368	0.816727	0.11874	0.12135	0.117	-0.00435	0.964874	9.63e-11	FALSE	yes	1	TRUE	no	NA	NA
ENST00000620214.1	ENSG00000105443.14	CYTH2	protein_coding	protein_coding	51.3049	48.8643	52.9319	0.887633	1.02255	0.115333	0.367504	0.539128	0.458926	0.592595	0.122488	0.228097	0.361829	NA	0.01044	0.00945	0.0111	0.00165	0.968708	9.63e-11	FALSE	no	0.402564	NA	no	NA	NA
ENST00000600597.1	ENSG00000105443.14	CYTH2	protein_coding	processed_transcript	51.3049	48.8643	52.9319	0.887633	1.02255	0.115333	0.367504	2.56716	2.7672	2.4338	1.51321	0.11504	-0.184507	NA	0.0505	0.0572	0.0460333	-0.0111667	0.982773	9.63e-11	NA	NA	0.141099	FALSE	NA	NA	NA
ENST00000391881.7	ENSG00000105443.14	CYTH2	protein_coding	nonsense_mediated_decay	51.3049	48.8643	52.9319	0.887633	1.02255	0.115333	0.367504	28.8344	27.6509	29.6234	3.91311	0.230125	0.0993762	0.815531	0.56182	0.5646	0.559967	-0.00463333	0.987596	9.63e-11	TRUE	yes	0.999999	TRUE	no	NA	NA
ENST00000427476.4	ENSG00000105443.14	CYTH2	protein_coding	protein_coding	51.3049	48.8643	52.9319	0.887633	1.02255	0.115333	0.367504	0.694472	0.661035	0.716763	0.130891	0.0872552	0.115096	0.92571	0.0136	0.0136	0.0136	-1.73e-18	0.991221	9.63e-11	FALSE	yes	1	TRUE	no	NA	NA
ENST00000493260.5	ENSG00000105443.14	CYTH2	protein_coding	retained_intron	51.3049	48.8643	52.9319	0.887633	1.02255	0.115333	0.367504	0.694963	0.651438	0.72398	0.0703182	0.0556111	0.150135	0.882855	0.01356	0.01335	0.0137	0.00035	0.991525	9.63e-11	NA	NA	0.999974	TRUE	NA	NA	NA
ENST00000407461.5	ENSG00000100413.16	POLR3H	protein_coding	protein_coding	36.2211	36.8481	35.8031	1.28153	1.42984	-0.0414943	0.883409	0.808651	2.02163	0	0.578117	0	-7.66649	NA	0.02176	0.0544	0	-0.0544	1.23e-10	1.23e-10	FALSE	yes	0.999754	TRUE	no	NA	NA
ENST00000442616.1	ENSG00000100413.16	POLR3H	protein_coding	nonsense_mediated_decay	36.2211	36.8481	35.8031	1.28153	1.42984	-0.0414943	0.883409	1.62782	0.977339	2.06148	0.215485	0.203383	1.06904	NA	0.04492	0.02635	0.0573	0.03095	0.0102286	1.23e-10	TRUE	yes	0.0799878	FALSE	no	NA	NA
ENST00000419338.5	ENSG00000198563.13	DDX39B	protein_coding	protein_coding	305.155	285.87	318.012	8.60506	4.16538	0.153721	0.051119	6.42367	0	10.7061	0	4.88472	10.0656	1.21e-07	0.02012	0	0.0335333	0.0335333	1.23e-10	1.23e-10	FALSE	yes	0.370459	NA	no	NA	NA
ENST00000431534.5	ENSG00000100413.16	POLR3H	protein_coding	nonsense_mediated_decay	36.2211	36.8481	35.8031	1.28153	1.42984	-0.0414943	0.883409	11.0107	9.8786	11.7654	0.846625	0.548407	0.251941	0.4338	0.30412	0.2676	0.328467	0.0608667	0.0461046	1.23e-10	TRUE	yes	0.959884	TRUE	no	NA	NA
ENST00000337566.9	ENSG00000100413.16	POLR3H	protein_coding	protein_coding	36.2211	36.8481	35.8031	1.28153	1.42984	-0.0414943	0.883409	0.450539	1.08664	0.0264681	0.607476	0.0264681	-4.91032	NA	0.0125	0.0301	0.000766667	-0.0293333	0.0600735	1.23e-10	FALSE	yes	0.998237	TRUE	no	NA	NA
ENST00000456662.5	ENSG00000198563.13	DDX39B	protein_coding	protein_coding	305.155	285.87	318.012	8.60506	4.16538	0.153721	0.051119	3.79295	8.08294	0.932957	0.0935082	0.932957	-3.1014	0.69504	0.01312	0.0283	0.003	-0.0253	0.308221	1.23e-10	FALSE	yes	0.385933	NA	no	NA	NA
ENST00000481456.1	ENSG00000198563.13	DDX39B	protein_coding	retained_intron	305.155	285.87	318.012	8.60506	4.16538	0.153721	0.051119	7.65255	8.35876	7.18175	0.763429	0.384475	-0.218672	0.383501	0.02526	0.02935	0.0225333	-0.00681667	0.540562	1.23e-10	NA	NA	0.999446	TRUE	NA	NA	NA
ENST00000376177.6	ENSG00000198563.13	DDX39B	protein_coding	protein_coding	305.155	285.87	318.012	8.60506	4.16538	0.153721	0.051119	48.6241	42.7312	52.5527	3.64616	2.38465	0.298411	0.0887141	0.15884	0.14925	0.165233	0.0159833	0.660239	1.23e-10	FALSE	yes	1	TRUE	no	NA	NA
ENST00000355209.8	ENSG00000100413.16	POLR3H	protein_coding	protein_coding	36.2211	36.8481	35.8031	1.28153	1.42984	-0.0414943	0.883409	15.2949	17.2331	14.0027	1.52251	0.511664	-0.299287	0.0552015	0.42348	0.46965	0.3927	-0.07695	0.707642	1.23e-10	FALSE	yes	0.969673	TRUE	no	NA	NA
ENST00000462256.5	ENSG00000198563.13	DDX39B	protein_coding	retained_intron	305.155	285.87	318.012	8.60506	4.16538	0.153721	0.051119	42.8835	43.3992	42.5397	2.25186	1.07577	-0.0288523	0.915221	0.14114	0.15215	0.1338	-0.01835	0.722598	1.23e-10	NA	NA	0.999668	TRUE	NA	NA	NA
ENST00000396504.6	ENSG00000100413.16	POLR3H	protein_coding	protein_coding	36.2211	36.8481	35.8031	1.28153	1.42984	-0.0414943	0.883409	6.30947	5.01017	7.17566	1.93268	1.08673	0.517386	0.680168	0.17322	0.1343	0.199167	0.0648667	0.733652	1.23e-10	FALSE	yes	0.984482	TRUE	no	NA	NA
ENST00000432789.1	ENSG00000100413.16	POLR3H	protein_coding	nonsense_mediated_decay	36.2211	36.8481	35.8031	1.28153	1.42984	-0.0414943	0.883409	0.452687	0.287743	0.56265	0.0430614	0.175473	0.943585	NA	0.01264	0.00785	0.0158333	0.00798333	0.764091	1.23e-10	TRUE	no	0.875309	TRUE	no	NA	NA
ENST00000449757.5	ENSG00000198563.13	DDX39B	protein_coding	protein_coding	305.155	285.87	318.012	8.60506	4.16538	0.153721	0.051119	4.20749	5.16503	3.56914	0.679191	1.18287	-0.531954	NA	0.01402	0.01815	0.0112667	-0.00688333	0.843069	1.23e-10	FALSE	yes	0.223141	FALSE	no	NA	NA
ENST00000428450.5	ENSG00000198563.13	DDX39B	protein_coding	protein_coding	305.155	285.87	318.012	8.60506	4.16538	0.153721	0.051119	7.66779	8.06244	7.40468	0.538478	1.23116	-0.12262	0.929447	0.02524	0.0283	0.0232	-0.0051	0.932366	1.23e-10	FALSE	yes	0.292395	NA	no	NA	NA
ENST00000419020.1	ENSG00000198563.13	DDX39B	protein_coding	protein_coding	305.155	285.87	318.012	8.60506	4.16538	0.153721	0.051119	52.1106	47.0603	55.4775	6.92265	1.62376	0.237346	0.505166	0.17038	0.16405	0.1746	0.01055	0.939074	1.23e-10	FALSE	yes	0.104086	FALSE	no	NA	NA
ENST00000428098.5	ENSG00000198563.13	DDX39B	protein_coding	protein_coding	305.155	285.87	318.012	8.60506	4.16538	0.153721	0.051119	5.22699	4.32122	5.83083	1.24231	1.33023	0.431398	0.743958	0.01712	0.0153	0.0183333	0.00303333	0.959638	1.23e-10	FALSE	yes	0.373323	NA	no	NA	NA
ENST00000474961.5	ENSG00000198563.13	DDX39B	protein_coding	retained_intron	305.155	285.87	318.012	8.60506	4.16538	0.153721	0.051119	12.3923	12.3539	12.4178	1.71028	1.11176	0.00743538	0.990518	0.04076	0.0434	0.039	-0.0044	0.959638	1.23e-10	NA	NA	0.986693	TRUE	NA	NA	NA
ENST00000484566.5	ENSG00000198563.13	DDX39B	protein_coding	nonsense_mediated_decay	305.155	285.87	318.012	8.60506	4.16538	0.153721	0.051119	16.4746	15.9683	16.8122	0.129749	0.297196	0.0742531	0.864832	0.05412	0.0559	0.0529333	-0.00296667	0.959638	1.23e-10	NA	no	0.93637	TRUE	no	NA	NA
ENST00000417023.5	ENSG00000198563.13	DDX39B	protein_coding	protein_coding	305.155	285.87	318.012	8.60506	4.16538	0.153721	0.051119	77.4658	73.8051	79.9062	5.29848	1.78126	0.114572	0.69357	0.25388	0.25785	0.251233	-0.00661667	0.964048	1.23e-10	NA	no	0.166175	FALSE	no	NA	NA
ENST00000458640.5	ENSG00000198563.13	DDX39B	protein_coding	protein_coding	305.155	285.87	318.012	8.60506	4.16538	0.153721	0.051119	11.001	10.5986	11.2692	0.514051	1.62528	0.0884352	0.909906	0.03614	0.03705	0.0355333	-0.00151667	0.968141	1.23e-10	FALSE	yes	1	TRUE	no	NA	NA
ENST00000396516.6	ENSG00000122299.11	ZC3H7A	protein_coding	protein_coding	48.3917	51.1227	46.571	2.2271	2.9156	-0.134505	0.463263	0.844217	0	1.40703	0	0.167726	7.14672	9.38e-08	0.01852	0	0.0308667	0.0308667	1.43e-10	1.43e-10	FALSE	yes	1	TRUE	no	NA	NA
ENST00000576247.1	ENSG00000122299.11	ZC3H7A	protein_coding	retained_intron	48.3917	51.1227	46.571	2.2271	2.9156	-0.134505	0.463263	7.49557	11.0656	5.11556	1.64533	2.34179	-1.1116	NA	0.14906	0.2155	0.104767	-0.110733	0.555265	1.43e-10	NA	NA	0.139163	FALSE	NA	NA	NA
ENST00000571405.5	ENSG00000122299.11	ZC3H7A	protein_coding	nonsense_mediated_decay	48.3917	51.1227	46.571	2.2271	2.9156	-0.134505	0.463263	9.78718	9.61704	9.90061	0.798298	0.369792	0.041881	0.922456	0.20306	0.1878	0.213233	0.0254333	0.5928	1.43e-10	NA	no	0.937916	TRUE	no	NA	NA
ENST00000572781.5	ENSG00000122299.11	ZC3H7A	protein_coding	protein_coding	48.3917	51.1227	46.571	2.2271	2.9156	-0.134505	0.463263	1.50519	1.09023	1.78183	0.182868	0.523382	0.703627	NA	0.03176	0.02125	0.0387667	0.0175167	0.853766	1.43e-10	FALSE	no	0.0312239	FALSE	no	NA	NA
ENST00000570862.1	ENSG00000122299.11	ZC3H7A	protein_coding	retained_intron	48.3917	51.1227	46.571	2.2271	2.9156	-0.134505	0.463263	1.44349	0.974545	1.75612	0.483351	0.673744	0.843057	NA	0.02994	0.0195	0.0369	0.0174	0.94011	1.43e-10	NA	NA	0.0798967	FALSE	NA	NA	NA
ENST00000355758.8	ENSG00000122299.11	ZC3H7A	protein_coding	protein_coding	48.3917	51.1227	46.571	2.2271	2.9156	-0.134505	0.463263	24.3361	25.264	23.7175	0.193059	0.644615	-0.0910951	0.503222	0.505	0.49525	0.5115	0.01625	0.959638	1.43e-10	FALSE	yes	1	TRUE	no	NA	NA
ENST00000575041.5	ENSG00000122299.11	ZC3H7A	protein_coding	nonsense_mediated_decay	48.3917	51.1227	46.571	2.2271	2.9156	-0.134505	0.463263	0.839149	0.74123	0.904428	0.211086	0.295348	0.283614	NA	0.0179	0.01435	0.0202667	0.00591667	0.959638	1.43e-10	TRUE	no	0.173591	FALSE	no	NA	NA
ENST00000575984.1	ENSG00000122299.11	ZC3H7A	protein_coding	protein_coding	48.3917	51.1227	46.571	2.2271	2.9156	-0.134505	0.463263	0.991137	1.05728	0.947044	0.104961	0.11822	-0.157278	0.903926	0.02078	0.02085	0.0207333	-0.000116667	0.998881	1.43e-10	FALSE	yes	0.940262	TRUE	no	NA	NA
ENST00000458478.5	ENSG00000168028.13	RPSA	protein_coding	protein_coding	1338.95	1470.29	1251.39	44.5486	45.1725	-0.232559	0.00527352	153.496	189.928	129.209	0.656008	5.07425	-0.555709	9.69e-11	0.11366	0.1293	0.103233	-0.0260667	1.34e-07	1.52e-10	FALSE	yes	0.509746	TRUE	no	NA	NA
ENST00000301821.10	ENSG00000168028.13	RPSA	protein_coding	protein_coding	1338.95	1470.29	1251.39	44.5486	45.1725	-0.232559	0.00527352	1126.44	1212.08	1069.35	42.9046	35.9222	-0.180747	0.0924784	0.8425	0.82425	0.854667	0.0304167	1.52e-10	1.52e-10	FALSE	yes	0.999999	TRUE	no	NA	NA
ENST00000443003.2	ENSG00000168028.13	RPSA	protein_coding	protein_coding	1338.95	1470.29	1251.39	44.5486	45.1725	-0.232559	0.00527352	22.4821	30.8472	16.9055	4.73365	3.28223	-0.867263	0.0606317	0.01638	0.0209	0.0133667	-0.00753333	0.469767	1.52e-10	FALSE	yes	0.999999	TRUE	no	NA	NA
ENST00000452172.1	ENSG00000154767.14	XPC	protein_coding	retained_intron	41.8494	41.9221	41.801	2.39575	0.454334	-0.00417011	0.979394	1.08658	0	1.81096	0	0.401155	7.50856	NA	0.02588	0	0.0431333	0.0431333	1.61e-10	1.61e-10	NA	NA	0.229674	FALSE	NA	NA	NA
ENST00000285021.11	ENSG00000154767.14	XPC	protein_coding	protein_coding	41.8494	41.9221	41.801	2.39575	0.454334	-0.00417011	0.979394	35.832	36.6571	35.2819	0.383011	0.935433	-0.0551489	0.740806	0.85728	0.87675	0.8443	-0.03245	0.824936	1.61e-10	FALSE	yes	1	TRUE	no	NA	NA
ENST00000427795.2	ENSG00000154767.14	XPC	protein_coding	retained_intron	41.8494	41.9221	41.801	2.39575	0.454334	-0.00417011	0.979394	1.98775	2.24579	1.81573	0.410674	0.296995	-0.305156	NA	0.04734	0.05315	0.0434667	-0.00968333	0.931355	1.61e-10	NA	NA	0.726076	TRUE	NA	NA	NA
ENST00000455144.6	ENSG00000154767.14	XPC	protein_coding	retained_intron	41.8494	41.9221	41.801	2.39575	0.454334	-0.00417011	0.979394	1.26641	1.14477	1.3475	0.30877	0.237076	0.233354	NA	0.03012	0.027	0.0322	0.0052	0.959638	1.61e-10	NA	NA	0.842466	TRUE	NA	NA	NA
ENST00000477324.6	ENSG00000154767.14	XPC	protein_coding	retained_intron	41.8494	41.9221	41.801	2.39575	0.454334	-0.00417011	0.979394	1.3661	1.32307	1.39479	0.741952	0.322517	0.0756039	NA	0.03222	0.03065	0.0332667	0.00261667	0.962098	1.61e-10	NA	NA	0.189387	FALSE	NA	NA	NA
ENST00000558908.5	ENSG00000140262.17	TCF12	protein_coding	processed_transcript	17.8986	18.6934	17.3688	2.01281	1.08981	-0.105975	0.68077	1.32362	0.0203902	2.19243	0.0203902	0.621748	6.17935	NA	0.0743	0.001	0.123167	0.122167	1.8e-10	1.8e-10	NA	NA	0.0415519	FALSE	NA	0	NA
ENST00000343827.7	ENSG00000140262.17	TCF12	protein_coding	protein_coding	17.8986	18.6934	17.3688	2.01281	1.08981	-0.105975	0.68077	1.71031	2.56852	1.13817	1.29542	0.420857	-1.16721	0.366837	0.09254	0.13145	0.0666	-0.06485	0.805284	1.8e-10	FALSE	yes	1	TRUE	no	0	NA
ENST00000267811.9	ENSG00000140262.17	TCF12	protein_coding	protein_coding	17.8986	18.6934	17.3688	2.01281	1.08981	-0.105975	0.68077	3.06524	3.75146	2.60777	0.478836	0.0280842	-0.522953	0.0162409	0.17318	0.20585	0.1514	-0.05445	0.809483	1.8e-10	FALSE	yes	1	TRUE	no	0	NA
ENST00000559703.1	ENSG00000140262.17	TCF12	protein_coding	protein_coding	17.8986	18.6934	17.3688	2.01281	1.08981	-0.105975	0.68077	0.55785	0.908254	0.324247	0.184404	0.20538	-1.45798	NA	0.03132	0.05025	0.0187	-0.03155	0.812508	1.8e-10	FALSE	yes	1	TRUE	no	0	NA
ENST00000559609.5	ENSG00000140262.17	TCF12	protein_coding	protein_coding	17.8986	18.6934	17.3688	2.01281	1.08981	-0.105975	0.68077	0.320605	0.385365	0.277432	0.144779	0.277432	-0.459961	NA	0.01842	0.02	0.0173667	-0.00263333	0.847269	1.8e-10	FALSE	yes	0.996454	TRUE	no	0	NA
ENST00000557843.5	ENSG00000140262.17	TCF12	protein_coding	protein_coding	17.8986	18.6934	17.3688	2.01281	1.08981	-0.105975	0.68077	2.30819	1.72703	2.69564	0.789087	0.547261	0.639341	0.51182	0.1329	0.09805	0.156133	0.0580833	0.85776	1.8e-10	FALSE	yes	1	TRUE	no	0	NA
ENST00000561152.1	ENSG00000140262.17	TCF12	protein_coding	nonsense_mediated_decay	17.8986	18.6934	17.3688	2.01281	1.08981	-0.105975	0.68077	0.223209	0.323085	0.156626	0.0478176	0.103586	-0.999279	NA	0.01282	0.01775	0.00953333	-0.00821667	0.927592	1.8e-10	TRUE	no	0.0420738	FALSE	no	0	NA
ENST00000561420.5	ENSG00000140262.17	TCF12	protein_coding	processed_transcript	17.8986	18.6934	17.3688	2.01281	1.08981	-0.105975	0.68077	0.443753	0.178243	0.62076	0.158194	0.312825	1.74449	NA	0.02486	0.0087	0.0356333	0.0269333	0.951992	1.8e-10	NA	NA	0.535956	TRUE	NA	0	NA
ENST00000333725.9	ENSG00000140262.17	TCF12	protein_coding	protein_coding	17.8986	18.6934	17.3688	2.01281	1.08981	-0.105975	0.68077	5.2268	5.83029	4.82447	0.888267	0.306384	-0.272682	0.459419	0.29316	0.3104	0.281667	-0.0287333	0.959638	1.8e-10	FALSE	yes	1	TRUE	no	0	NA
ENST00000557947.5	ENSG00000140262.17	TCF12	protein_coding	protein_coding	17.8986	18.6934	17.3688	2.01281	1.08981	-0.105975	0.68077	0.250124	0	0.416873	0	0.416873	5.41573	NA	0.01282	0	0.0213667	0.0213667	0.959638	1.8e-10	FALSE	no	0.109501	FALSE	no	0	NA
ENST00000561346.5	ENSG00000140262.17	TCF12	protein_coding	processed_transcript	17.8986	18.6934	17.3688	2.01281	1.08981	-0.105975	0.68077	2.11665	2.61345	1.78545	1.23009	0.743526	-0.547119	NA	0.1133	0.13425	0.0993333	-0.0349167	0.959638	1.8e-10	NA	NA	0.123462	FALSE	NA	0	NA
ENST00000545723.1	ENSG00000171681.12	ATF7IP	protein_coding	protein_coding	20.5159	22.0687	19.4807	0.686699	0.543458	-0.179867	0.147207	0.538384	1.34596	0	0.173107	0	-7.08317	NA	0.02434	0.06085	0	-0.06085	1.94e-10	1.94e-10	FALSE	yes	0.107004	FALSE	no	NA	NA
ENST00000537653.5	ENSG00000171681.12	ATF7IP	protein_coding	retained_intron	20.5159	22.0687	19.4807	0.686699	0.543458	-0.179867	0.147207	0.563541	0.188609	0.813496	0.188609	0.118641	2.05183	NA	0.02852	0.0083	0.042	0.0337	0.337409	1.94e-10	NA	NA	1	TRUE	NA	NA	NA
ENST00000544627.5	ENSG00000171681.12	ATF7IP	protein_coding	protein_coding	20.5159	22.0687	19.4807	0.686699	0.543458	-0.179867	0.147207	1.94063	1.71477	2.09119	0.752434	0.350764	0.284802	0.835302	0.0946	0.0767	0.106533	0.0298333	0.889026	1.94e-10	FALSE	yes	1	TRUE	no	NA	NA
ENST00000536444.5	ENSG00000171681.12	ATF7IP	protein_coding	protein_coding	20.5159	22.0687	19.4807	0.686699	0.543458	-0.179867	0.147207	2.6044	2.35907	2.76795	0.434385	0.678786	0.229702	0.821272	0.128	0.1064	0.1424	0.036	0.936379	1.94e-10	FALSE	yes	1	TRUE	no	NA	NA
ENST00000539659.5	ENSG00000171681.12	ATF7IP	protein_coding	processed_transcript	20.5159	22.0687	19.4807	0.686699	0.543458	-0.179867	0.147207	0.62031	1.00244	0.365558	1.00244	0.365558	-1.43073	NA	0.02944	0.0469	0.0178	-0.0291	0.959638	1.94e-10	NA	NA	1	TRUE	NA	NA	NA
ENST00000540793.5	ENSG00000171681.12	ATF7IP	protein_coding	protein_coding	20.5159	22.0687	19.4807	0.686699	0.543458	-0.179867	0.147207	4.88287	5.79966	4.27168	0.345291	1.0342	-0.440277	0.542223	0.23812	0.26355	0.221167	-0.0423833	0.959638	1.94e-10	FALSE	yes	1	TRUE	no	NA	NA
ENST00000542967.1	ENSG00000171681.12	ATF7IP	protein_coding	protein_coding	20.5159	22.0687	19.4807	0.686699	0.543458	-0.179867	0.147207	0.490546	0.555632	0.447156	0.555632	0.447156	-0.307177	NA	0.02282	0.0244	0.0217667	-0.00263333	0.959638	1.94e-10	FALSE	no	0.253696	NA	no	NA	NA
ENST00000543189.5	ENSG00000171681.12	ATF7IP	protein_coding	protein_coding	20.5159	22.0687	19.4807	0.686699	0.543458	-0.179867	0.147207	1.03708	0.93257	1.10675	0.301034	0.295813	0.244634	0.883364	0.05108	0.04185	0.0572333	0.0153833	0.959638	1.94e-10	FALSE	yes	1	TRUE	no	NA	NA
ENST00000261168.8	ENSG00000171681.12	ATF7IP	protein_coding	protein_coding	20.5159	22.0687	19.4807	0.686699	0.543458	-0.179867	0.147207	7.35758	7.78082	7.07542	0.369002	0.849478	-0.136922	0.788902	0.35912	0.35345	0.3629	0.00945	0.974242	1.94e-10	FALSE	yes	1	TRUE	no	NA	NA
ENST00000523521.1	ENSG00000147471.11	PLPBP	protein_coding	protein_coding	25.3517	28.0741	23.5367	3.15345	1.01028	-0.254226	0.2211	0.59214	1.48035	0	0.0734296	0	-7.21951	NA	0.02148	0.0537	0	-0.0537	2.15e-10	2.15e-10	FALSE	yes	0.0681664	FALSE	no	NA	NA
ENST00000523187.5	ENSG00000147471.11	PLPBP	protein_coding	protein_coding	25.3517	28.0741	23.5367	3.15345	1.01028	-0.254226	0.2211	0.725504	0	1.20917	0	0.605148	6.92976	NA	0.03106	0	0.0517667	0.0517667	0.00103951	2.15e-10	FALSE	yes	0.0856005	FALSE	no	NA	NA
ENST00000328195.7	ENSG00000147471.11	PLPBP	protein_coding	protein_coding	25.3517	28.0741	23.5367	3.15345	1.01028	-0.254226	0.2211	16.0029	16.1548	15.9016	0.667101	0.105609	-0.0227757	0.942204	0.63878	0.5801	0.6779	0.0978	0.489948	2.15e-10	FALSE	yes	0.999576	TRUE	no	NA	NA
ENST00000521631.1	ENSG00000147471.11	PLPBP	protein_coding	retained_intron	25.3517	28.0741	23.5367	3.15345	1.01028	-0.254226	0.2211	3.67965	6.33751	1.90775	1.69622	0.97881	-1.72678	NA	0.13694	0.22175	0.0804	-0.14135	0.866998	2.15e-10	NA	NA	0.0406794	FALSE	NA	NA	NA
ENST00000523358.5	ENSG00000147471.11	PLPBP	protein_coding	protein_coding	25.3517	28.0741	23.5367	3.15345	1.01028	-0.254226	0.2211	2.43258	2.01348	2.71198	0.810555	0.967719	0.427815	NA	0.0951	0.06935	0.112267	0.0429167	0.907836	2.15e-10	FALSE	yes	0.180749	FALSE	no	NA	NA
ENST00000523994.1	ENSG00000147471.11	PLPBP	protein_coding	retained_intron	25.3517	28.0741	23.5367	3.15345	1.01028	-0.254226	0.2211	0.357665	0.280365	0.409198	0.280365	0.103431	0.529767	NA	0.01402	0.009	0.0173667	0.00836667	0.909784	2.15e-10	NA	NA	0.873896	TRUE	NA	NA	NA
ENST00000518036.5	ENSG00000147471.11	PLPBP	protein_coding	nonsense_mediated_decay	25.3517	28.0741	23.5367	3.15345	1.01028	-0.254226	0.2211	0.453448	0.518157	0.410308	0.307645	0.213019	-0.329518	NA	0.0178	0.0174	0.0180667	0.000666667	0.969937	2.15e-10	TRUE	no	0.0856874	FALSE	no	NA	NA
ENST00000520073.5	ENSG00000147471.11	PLPBP	protein_coding	retained_intron	25.3517	28.0741	23.5367	3.15345	1.01028	-0.254226	0.2211	0.869772	0.925828	0.832401	0.497635	0.318176	-0.151737	NA	0.03562	0.0354	0.0357667	0.000366667	0.983307	2.15e-10	NA	NA	0.558919	TRUE	NA	NA	NA
ENST00000361175.8	ENSG00000198682.12	PAPSS2	protein_coding	protein_coding	37.3599	38.9034	36.3309	1.33451	2.15937	-0.098673	0.614589	35.2964	38.2917	33.2996	1.34473	2.16555	-0.201472	0.286594	0.9434	0.98425	0.916167	-0.0680833	0.000839123	2.18e-10	FALSE	yes	1	TRUE	no	NA	NA
ENST00000635584.1	ENSG00000100393.12	EP300	protein_coding	processed_transcript	18.9772	20.7078	17.8234	0.538738	0.433138	-0.216286	0.0397372	0.485608	1.21402	0	0.111339	0	-6.93548	NA	0.02342	0.05855	0	-0.05855	2.18e-10	2.18e-10	NA	NA	0.943249	TRUE	NA	NA	NA
ENST00000465996.5	ENSG00000198682.12	PAPSS2	protein_coding	processed_transcript	37.3599	38.9034	36.3309	1.33451	2.15937	-0.098673	0.614589	0.825922	0	1.37654	0	0.211161	7.11534	NA	0.02296	0	0.0382667	0.0382667	2.18e-10	2.18e-10	NA	NA	0.0772548	FALSE	NA	NA	NA
ENST00000634728.1	ENSG00000100393.12	EP300	protein_coding	protein_coding	18.9772	20.7078	17.8234	0.538738	0.433138	-0.216286	0.0397372	0.863934	1.41816	0.494453	0.255917	0.126708	-1.50136	NA	0.04432	0.06885	0.0279667	-0.0408833	0.294543	2.18e-10	FALSE	yes	0.190143	FALSE	no	NA	NA
ENST00000482258.1	ENSG00000198682.12	PAPSS2	protein_coding	processed_transcript	37.3599	38.9034	36.3309	1.33451	2.15937	-0.098673	0.614589	0.85192	0	1.41987	0	0.710887	7.15974	NA	0.02336	0	0.0389333	0.0389333	0.549583	2.18e-10	NA	NA	0.026687	FALSE	NA	NA	NA
ENST00000635083.1	ENSG00000100393.12	EP300	protein_coding	retained_intron	18.9772	20.7078	17.8234	0.538738	0.433138	-0.216286	0.0397372	1.42855	0.591314	1.98671	0.591314	0.733454	1.73143	NA	0.07698	0.02785	0.109733	0.0818833	0.649184	2.18e-10	NA	NA	0.0595244	FALSE	NA	NA	NA
ENST00000635691.1	ENSG00000100393.12	EP300	protein_coding	retained_intron	18.9772	20.7078	17.8234	0.538738	0.433138	-0.216286	0.0397372	0.519952	0.225549	0.716221	0.225549	0.196428	1.62438	NA	0.02834	0.0112	0.0397667	0.0285667	0.661046	2.18e-10	NA	NA	0.119216	FALSE	NA	NA	NA
ENST00000456849.1	ENSG00000198682.12	PAPSS2	protein_coding	protein_coding	37.3599	38.9034	36.3309	1.33451	2.15937	-0.098673	0.614589	0.385623	0.611681	0.234917	0.0102183	0.234917	-1.34388	NA	0.01028	0.01575	0.00663333	-0.00911667	0.721221	2.18e-10	FALSE	yes	1	TRUE	no	NA	NA
ENST00000263253.8	ENSG00000100393.12	EP300	protein_coding	protein_coding	18.9772	20.7078	17.8234	0.538738	0.433138	-0.216286	0.0397372	15.0979	16.8143	13.9536	0.354234	0.235953	-0.268876	7.64e-05	0.79548	0.8121	0.7844	-0.0277	0.959638	2.18e-10	FALSE	yes	1	TRUE	no	NA	NA
ENST00000634787.1	ENSG00000100393.12	EP300	protein_coding	retained_intron	18.9772	20.7078	17.8234	0.538738	0.433138	-0.216286	0.0397372	0.293645	0.142731	0.394254	0.142731	0.305983	1.40427	NA	0.01622	0.0067	0.0225667	0.0158667	0.959638	2.18e-10	NA	NA	0.175791	FALSE	NA	NA	NA
ENST00000396675.7	ENSG00000003147.17	ICA1	protein_coding	protein_coding	32.3497	30.1282	33.8307	4.99729	2.96948	0.16717	0.556816	0.619628	0	1.03271	0	0.0814513	6.7042	NA	0.01848	0	0.0308	0.0308	2.59e-10	2.59e-10	FALSE	yes	1	TRUE	no	NA	NA
ENST00000446305.1	ENSG00000003147.17	ICA1	protein_coding	protein_coding	32.3497	30.1282	33.8307	4.99729	2.96948	0.16717	0.556816	0.936675	1.59768	0.496005	0.0539235	0.25459	-1.66776	NA	0.03094	0.0548	0.0150333	-0.0397667	0.72994	2.59e-10	FALSE	yes	0.0348734	FALSE	no	NA	NA
ENST00000490041.1	ENSG00000003147.17	ICA1	protein_coding	retained_intron	32.3497	30.1282	33.8307	4.99729	2.96948	0.16717	0.556816	1.32739	0.999413	1.54605	0.163416	0.274796	0.624371	NA	0.04026	0.0332	0.0449667	0.0117667	0.774203	2.59e-10	NA	NA	0.152734	FALSE	NA	NA	NA
ENST00000402384.7	ENSG00000003147.17	ICA1	protein_coding	protein_coding	32.3497	30.1282	33.8307	4.99729	2.96948	0.16717	0.556816	1.8068	2.85176	1.11017	1.31803	0.745906	-1.35319	0.769511	0.06446	0.1048	0.0375667	-0.0672333	0.870344	2.59e-10	FALSE	yes	1	TRUE	no	NA	NA
ENST00000457755.5	ENSG00000003147.17	ICA1	protein_coding	nonsense_mediated_decay	32.3497	30.1282	33.8307	4.99729	2.96948	0.16717	0.556816	2.40768	1.20293	3.21084	1.20293	1.41401	1.40895	NA	0.06684	0.03425	0.0885667	0.0543167	0.884198	2.59e-10	TRUE	yes	0.137545	FALSE	no	NA	NA
ENST00000339809.10	ENSG00000003147.17	ICA1	protein_coding	nonsense_mediated_decay	32.3497	30.1282	33.8307	4.99729	2.96948	0.16717	0.556816	1.54646	1.72134	1.42987	0.864953	0.852734	-0.265949	NA	0.0497	0.05385	0.0469333	-0.00691667	0.959638	2.59e-10	TRUE	yes	0.99987	TRUE	no	NA	NA
ENST00000407906.5	ENSG00000003147.17	ICA1	protein_coding	protein_coding	32.3497	30.1282	33.8307	4.99729	2.96948	0.16717	0.556816	0.868857	0.945303	0.817894	0.0130347	0.275677	-0.206512	NA	0.02856	0.0323	0.0260667	-0.00623333	0.959638	2.59e-10	FALSE	yes	0.999999	TRUE	no	NA	NA
ENST00000447326.5	ENSG00000003147.17	ICA1	protein_coding	protein_coding	32.3497	30.1282	33.8307	4.99729	2.96948	0.16717	0.556816	2.04788	1.42989	2.45988	0.0637466	0.849688	0.778486	NA	0.06462	0.04845	0.0754	0.02695	0.959638	2.59e-10	FALSE	yes	0.162443	FALSE	no	NA	NA
ENST00000455539.5	ENSG00000003147.17	ICA1	protein_coding	nonsense_mediated_decay	32.3497	30.1282	33.8307	4.99729	2.96948	0.16717	0.556816	0.791286	0.845462	0.755168	0.437659	0.412353	-0.160928	NA	0.0246	0.02635	0.0234333	-0.00291667	0.959638	2.59e-10	TRUE	yes	1	TRUE	no	NA	NA
ENST00000470696.1	ENSG00000003147.17	ICA1	protein_coding	retained_intron	32.3497	30.1282	33.8307	4.99729	2.96948	0.16717	0.556816	1.02807	0.872828	1.13156	0.189757	0.214857	0.370803	NA	0.0314	0.02875	0.0331667	0.00441667	0.959638	2.59e-10	NA	NA	0.0509743	FALSE	NA	NA	NA
ENST00000430867.5	ENSG00000003147.17	ICA1	protein_coding	protein_coding	32.3497	30.1282	33.8307	4.99729	2.96948	0.16717	0.556816	2.99438	3.26187	2.81604	2.19139	1.08068	-0.211334	NA	0.08746	0.09895	0.0798	-0.01915	0.968437	2.59e-10	FALSE	yes	0.134317	FALSE	no	NA	NA
ENST00000401396.5	ENSG00000003147.17	ICA1	protein_coding	protein_coding	32.3497	30.1282	33.8307	4.99729	2.96948	0.16717	0.556816	9.19918	8.17809	9.87991	0.0118332	1.58242	0.27243	0.658105	0.2852	0.27905	0.2893	0.01025	0.969476	2.59e-10	FALSE	yes	1	TRUE	no	NA	NA
ENST00000265577.11	ENSG00000003147.17	ICA1	protein_coding	protein_coding	32.3497	30.1282	33.8307	4.99729	2.96948	0.16717	0.556816	1.47652	1.37821	1.54206	0.797086	0.771043	0.160965	0.983169	0.04654	0.0425	0.0492333	0.00673333	0.97164	2.59e-10	FALSE	yes	1	TRUE	no	NA	NA
ENST00000406470.6	ENSG00000003147.17	ICA1	protein_coding	protein_coding	32.3497	30.1282	33.8307	4.99729	2.96948	0.16717	0.556816	5.11937	4.62286	5.45038	0.238972	1.45552	0.2371	0.862435	0.15594	0.1564	0.155633	-0.000766667	0.980636	2.59e-10	FALSE	yes	1	TRUE	no	NA	NA
ENST00000581471.2	ENSG00000263753.6	LINC00667	lincRNA	lincRNA	2.67689	2.0748	3.07828	0.290459	0.0923943	0.566897	0.24262	1.26194	1.51324	1.09441	0.230118	0.0593126	-0.463864	NA	0.50512	0.7281	0.356467	-0.371633	3.25e-05	3.31e-10	NA	NA	0.0163188	FALSE	NA	0	FALSE
ENST00000580082.1	ENSG00000263753.6	LINC00667	lincRNA	lincRNA	2.67689	2.0748	3.07828	0.290459	0.0923943	0.566897	0.24262	0.605894	0	1.00982	0	0.0839211	6.67218	NA	0.19622	0	0.327033	0.327033	3.31e-10	3.31e-10	NA	NA	0.0198305	FALSE	NA	0	FALSE
ENST00000580684.5	ENSG00000263753.6	LINC00667	lincRNA	lincRNA	2.67689	2.0748	3.07828	0.290459	0.0923943	0.566897	0.24262	0.383213	0.147829	0.540136	0.147829	0.0489173	1.80143	NA	0.13022	0.0625	0.175367	0.112867	0.665312	3.31e-10	NA	NA	0.0476677	FALSE	NA	0	FALSE
ENST00000582363.1	ENSG00000263753.6	LINC00667	lincRNA	lincRNA	2.67689	2.0748	3.07828	0.290459	0.0923943	0.566897	0.24262	0.198397	0.232182	0.175874	0.038476	0.0528939	-0.381769	NA	0.08124	0.1168	0.0575333	-0.0592667	0.833831	3.31e-10	NA	NA	0.158051	FALSE	NA	2	FALSE
ENST00000577439.1	ENSG00000263753.6	LINC00667	lincRNA	lincRNA	2.67689	2.0748	3.07828	0.290459	0.0923943	0.566897	0.24262	0.0265072	0.066268	0	0.066268	0	-2.93108	NA	0.0112	0.028	0	-0.028	0.904508	3.31e-10	NA	NA	0.0905589	FALSE	NA	0	FALSE
ENST00000582008.5	ENSG00000263753.6	LINC00667	lincRNA	lincRNA	2.67689	2.0748	3.07828	0.290459	0.0923943	0.566897	0.24262	0.200935	0.11528	0.258037	0.11528	0.0300441	1.09727	NA	0.07598	0.0646	0.0835667	0.0189667	0.952547	3.31e-10	NA	NA	0.0833192	FALSE	NA	0	FALSE
ENST00000458447.5	ENSG00000189058.8	APOD	protein_coding	nonsense_mediated_decay	33.5828	31.599	34.9053	4.39855	4.51257	0.143521	0.682597	0.809765	1.23772	0.524464	0.0754779	0.102737	-1.22313	NA	0.02488	0.0396	0.0150667	-0.0245333	0.0266914	3.48e-10	TRUE	no	0.886484	TRUE	yes	NA	NA
ENST00000421243.5	ENSG00000189058.8	APOD	protein_coding	protein_coding	33.5828	31.599	34.9053	4.39855	4.51257	0.143521	0.682597	1.23482	0.0100244	2.05136	0.0100244	0.390828	6.68569	NA	0.0363	0.0003	0.0603	0.06	3.48e-10	3.48e-10	FALSE	yes	0.318576	NA	yes	NA	NA
ENST00000343267.7	ENSG00000189058.8	APOD	protein_coding	protein_coding	33.5828	31.599	34.9053	4.39855	4.51257	0.143521	0.682597	31.3294	30.1227	32.134	4.45145	4.21899	0.0932195	0.896731	0.93278	0.95215	0.919867	-0.0322833	0.0937078	3.48e-10	FALSE	yes	0.998696	TRUE	yes	NA	NA
ENST00000292879.9	ENSG00000161265.14	U2AF1L4	protein_coding	protein_coding	16.2818	14.5036	17.4673	0.860396	1.7914	0.268079	0.491227	5.50753	6.18259	5.05748	0.709279	0.355381	-0.289275	0.722414	0.3448	0.4249	0.2914	-0.1335	0.00156408	3.98e-10	FALSE	yes	0.997837	TRUE	no	0	NA
ENST00000587886.2	ENSG00000161265.14	U2AF1L4	protein_coding	protein_coding	16.2818	14.5036	17.4673	0.860396	1.7914	0.268079	0.491227	0.677084	0	1.12847	0	0.022202	6.83096	NA	0.03962	0	0.0660333	0.0660333	3.98e-10	3.98e-10	FALSE	no	0.011363	FALSE	no	0	NA
ENST00000588892.1	ENSG00000161265.14	U2AF1L4	protein_coding	retained_intron	16.2818	14.5036	17.4673	0.860396	1.7914	0.268079	0.491227	0.410074	0.822108	0.135385	0.210404	0.0701569	-2.51689	NA	0.02762	0.05775	0.00753333	-0.0502167	0.0667487	3.98e-10	NA	NA	0.406671	NA	NA	6	NA
ENST00000588980.5	ENSG00000161265.14	U2AF1L4	protein_coding	retained_intron	16.2818	14.5036	17.4673	0.860396	1.7914	0.268079	0.491227	0.472616	0.19328	0.658841	0.143158	0.0663835	1.7182	NA	0.02842	0.0128	0.0388333	0.0260333	0.478996	3.98e-10	NA	NA	0.112612	FALSE	NA	4	NA
ENST00000378975.7	ENSG00000161265.14	U2AF1L4	protein_coding	protein_coding	16.2818	14.5036	17.4673	0.860396	1.7914	0.268079	0.491227	0.218235	0	0.363725	0	0.182806	5.2239	NA	0.01238	0	0.0206333	0.0206333	0.558827	3.98e-10	FALSE	yes	0.936782	TRUE	no	0	NA
ENST00000592913.5	ENSG00000161265.14	U2AF1L4	protein_coding	retained_intron	16.2818	14.5036	17.4673	0.860396	1.7914	0.268079	0.491227	1.4103	0.93562	1.72676	0.063498	0.162396	0.877064	NA	0.08628	0.06445	0.100833	0.0363833	0.614904	3.98e-10	NA	NA	0.0616045	FALSE	NA	1	NA
ENST00000591084.5	ENSG00000161265.14	U2AF1L4	protein_coding	nonsense_mediated_decay	16.2818	14.5036	17.4673	0.860396	1.7914	0.268079	0.491227	0.827926	1.03025	0.693041	0.102502	0.238008	-0.565255	NA	0.05388	0.0717	0.042	-0.0297	0.817844	3.98e-10	TRUE	no	0.634316	TRUE	no	0	NA
ENST00000585554.5	ENSG00000161265.14	U2AF1L4	protein_coding	retained_intron	16.2818	14.5036	17.4673	0.860396	1.7914	0.268079	0.491227	0.704671	0.32078	0.960598	0.32078	0.404798	1.553	NA	0.04104	0.0235	0.0527333	0.0292333	0.91809	3.98e-10	NA	NA	0.848729	TRUE	NA	1	NA
ENST00000601236.1	ENSG00000161265.14	U2AF1L4	protein_coding	nonsense_mediated_decay	16.2818	14.5036	17.4673	0.860396	1.7914	0.268079	0.491227	1.25492	1.33796	1.19956	0.175722	0.271253	-0.156291	NA	0.08038	0.09325	0.0718	-0.02145	0.955069	3.98e-10	TRUE	yes	0.0383349	FALSE	no	0	NA
ENST00000585771.5	ENSG00000161265.14	U2AF1L4	protein_coding	retained_intron	16.2818	14.5036	17.4673	0.860396	1.7914	0.268079	0.491227	0.883352	0.767401	0.960652	0.104721	0.736829	0.320296	NA	0.05072	0.0535	0.0488667	-0.00463333	0.959638	3.98e-10	NA	NA	0.0196321	FALSE	NA	1	NA
ENST00000587987.5	ENSG00000161265.14	U2AF1L4	protein_coding	nonsense_mediated_decay	16.2818	14.5036	17.4673	0.860396	1.7914	0.268079	0.491227	1.3244	1.33517	1.31722	0.0921435	0.220307	-0.0193789	NA	0.08436	0.092	0.0792667	-0.0127333	0.959638	3.98e-10	TRUE	no	0.997621	TRUE	no	1	NA
ENST00000589429.5	ENSG00000161265.14	U2AF1L4	protein_coding	nonsense_mediated_decay	16.2818	14.5036	17.4673	0.860396	1.7914	0.268079	0.491227	0.462604	0.275267	0.587496	0.275267	0.307361	1.06662	NA	0.02588	0.0179	0.0312	0.0133	0.959638	3.98e-10	TRUE	no	0.288697	NA	no	0	NA
ENST00000600296.5	ENSG00000161265.14	U2AF1L4	protein_coding	nonsense_mediated_decay	16.2818	14.5036	17.4673	0.860396	1.7914	0.268079	0.491227	1.27126	0.530144	1.76533	0.530144	1.14701	1.71667	NA	0.06962	0.0345	0.0930333	0.0585333	0.959638	3.98e-10	NA	no	0.145647	FALSE	no	0	NA
ENST00000586476.5	ENSG00000161265.14	U2AF1L4	protein_coding	retained_intron	16.2818	14.5036	17.4673	0.860396	1.7914	0.268079	0.491227	0.529922	0.429792	0.596676	0.0187918	0.153634	0.464106	NA	0.0334	0.02965	0.0359	0.00625	0.971338	3.98e-10	NA	NA	0.663074	TRUE	NA	4	NA
ENST00000522940.5	ENSG00000164919.10	COX6C	protein_coding	protein_coding	3420.88	3178.16	3582.69	217.333	294.173	0.172853	0.610122	55.3967	42.8946	63.7314	2.14492	4.26111	0.571097	0.000985439	0.0161	0.01355	0.0178	0.00425	4.06e-10	4.06e-10	FALSE	yes	0.0495372	FALSE	no	NA	NA
ENST00000520271.5	ENSG00000164919.10	COX6C	protein_coding	protein_coding	3420.88	3178.16	3582.69	217.333	294.173	0.172853	0.610122	317.535	274.824	346.009	8.91612	22.8146	0.332291	0.026191	0.0928	0.0867	0.0968667	0.0101667	0.0335941	4.06e-10	FALSE	yes	0.0991472	FALSE	no	NA	NA
ENST00000518171.5	ENSG00000164919.10	COX6C	protein_coding	protein_coding	3420.88	3178.16	3582.69	217.333	294.173	0.172853	0.610122	46.3127	40.3627	50.2794	4.49642	2.42808	0.316873	0.177396	0.01352	0.01265	0.0141	0.00145	0.446411	4.06e-10	FALSE	yes	0.202973	FALSE	no	NA	NA
ENST00000297564.6	ENSG00000164919.10	COX6C	protein_coding	protein_coding	3420.88	3178.16	3582.69	217.333	294.173	0.172853	0.610122	40.7688	30.901	47.3473	2.13103	12.5444	0.615465	0.432731	0.01176	0.00985	0.0130333	0.00318333	0.933728	4.06e-10	FALSE	yes	0.0719659	FALSE	no	NA	NA
ENST00000522934.5	ENSG00000164919.10	COX6C	protein_coding	nonsense_mediated_decay	3420.88	3178.16	3582.69	217.333	294.173	0.172853	0.610122	2164.5	2063.71	2231.69	217.769	113.431	0.112894	0.65022	0.63506	0.6477	0.626633	-0.0210667	0.959638	4.06e-10	TRUE	yes	0.155833	FALSE	no	NA	NA
ENST00000524245.5	ENSG00000164919.10	COX6C	protein_coding	protein_coding	3420.88	3178.16	3582.69	217.333	294.173	0.172853	0.610122	47.8194	45.0888	49.6398	2.68745	8.7766	0.138699	0.87426	0.01388	0.0142	0.0136667	-0.000533333	0.962846	4.06e-10	FALSE	yes	0.173744	FALSE	no	NA	NA
ENST00000517682.6	ENSG00000164919.10	COX6C	protein_coding	protein_coding	3420.88	3178.16	3582.69	217.333	294.173	0.172853	0.610122	685.546	643.768	713.399	15.6195	125.467	0.148167	0.897546	0.19936	0.20385	0.196367	-0.00748333	0.97063	4.06e-10	FALSE	yes	0.0719659	FALSE	no	NA	NA
ENST00000443626.5	ENSG00000130414.11	NDUFA10	protein_coding	protein_coding	169.522	186.642	158.109	0.693855	2.7816	-0.239341	0.00981371	3.19875	1.43294	4.37596	0.301283	0.243271	1.60388	NA	0.0197	0.0077	0.0277	0.02	4.2e-10	4.2e-10	FALSE	yes	0.304847	NA	no	NA	NA
ENST00000476216.5	ENSG00000130414.11	NDUFA10	protein_coding	retained_intron	169.522	186.642	158.109	0.693855	2.7816	-0.239341	0.00981371	15.3615	19.136	12.8452	0.642122	1.52417	-0.574695	0.113584	0.09	0.10255	0.0816333	-0.0209167	0.777574	4.2e-10	NA	NA	0.871947	TRUE	NA	NA	NA
ENST00000485344.6	ENSG00000130414.11	NDUFA10	protein_coding	retained_intron	169.522	186.642	158.109	0.693855	2.7816	-0.239341	0.00981371	4.34906	4.58318	4.19297	0.148326	0.20468	-0.128084	0.704964	0.02572	0.02455	0.0265	0.00195	0.948821	4.2e-10	NA	NA	0.986113	TRUE	NA	NA	NA
ENST00000497536.1	ENSG00000130414.11	NDUFA10	protein_coding	retained_intron	169.522	186.642	158.109	0.693855	2.7816	-0.239341	0.00981371	56.3012	62.8232	51.9533	1.11237	2.98398	-0.274033	0.213884	0.33154	0.3366	0.328167	-0.00843333	0.959638	4.2e-10	NA	NA	0.874276	TRUE	NA	NA	NA
ENST00000620965.4	ENSG00000130414.11	NDUFA10	protein_coding	protein_coding	169.522	186.642	158.109	0.693855	2.7816	-0.239341	0.00981371	82.6354	90.4604	77.4187	1.18318	1.85702	-0.224577	0.00673669	0.4876	0.4847	0.489533	0.00483333	0.959638	4.2e-10	FALSE	yes	1	TRUE	no	NA	NA
ENST00000407129.3	ENSG00000130414.11	NDUFA10	protein_coding	protein_coding	169.522	186.642	158.109	0.693855	2.7816	-0.239341	0.00981371	2.83503	2.99523	2.72823	0.95026	1.33027	-0.134233	NA	0.01688	0.01605	0.0174333	0.00138333	0.977115	4.2e-10	FALSE	yes	0.995649	TRUE	no	NA	NA
ENST00000252711.6	ENSG00000130414.11	NDUFA10	protein_coding	protein_coding	169.522	186.642	158.109	0.693855	2.7816	-0.239341	0.00981371	2.47609	2.7478	2.29494	0.21942	0.116008	-0.258785	0.453842	0.01458	0.0147	0.0145	-0.0002	0.992614	4.2e-10	FALSE	yes	0.999871	TRUE	no	NA	NA
ENST00000310454.10	ENSG00000115159.15	GPD2	protein_coding	protein_coding	49.4061	46.5883	51.2847	0.706675	0.384009	0.138532	0.116025	30.5621	32.2401	29.4434	0.893873	0.286052	-0.130869	0.107442	0.62126	0.6919	0.574167	-0.117733	4.3e-10	4.3e-10	FALSE	yes	1	TRUE	no	0	NA
ENST00000492005.1	ENSG00000115159.15	GPD2	protein_coding	processed_transcript	49.4061	46.5883	51.2847	0.706675	0.384009	0.138532	0.116025	2.47966	0.64229	3.70457	0.64229	1.02187	2.50961	NA	0.04884	0.0136	0.0723333	0.0587333	0.551941	4.3e-10	NA	NA	0.200711	FALSE	NA	0	NA
ENST00000496190.1	ENSG00000115159.15	GPD2	protein_coding	processed_transcript	49.4061	46.5883	51.2847	0.706675	0.384009	0.138532	0.116025	2.44797	1.3984	3.14768	1.3984	1.05625	1.1648	NA	0.0489	0.0305	0.0611667	0.0306667	0.861296	4.3e-10	NA	NA	0.158776	FALSE	NA	0	NA
ENST00000415049.5	ENSG00000115159.15	GPD2	protein_coding	protein_coding	49.4061	46.5883	51.2847	0.706675	0.384009	0.138532	0.116025	0.764675	0.514851	0.931224	0.514851	0.116072	0.842628	NA	0.01524	0.0109	0.0181333	0.00723333	0.881768	4.3e-10	FALSE	yes	0.0731133	FALSE	no	0	NA
ENST00000464846.5	ENSG00000115159.15	GPD2	protein_coding	retained_intron	49.4061	46.5883	51.2847	0.706675	0.384009	0.138532	0.116025	1.64539	1.33568	1.85187	0.152802	0.324816	0.468418	NA	0.0331	0.02865	0.0360667	0.00741667	0.939074	4.3e-10	NA	NA	0.253643	NA	NA	1	NA
ENST00000438166.6	ENSG00000115159.15	GPD2	protein_coding	protein_coding	49.4061	46.5883	51.2847	0.706675	0.384009	0.138532	0.116025	10.2057	9.35395	10.7735	0.229359	0.551165	0.20364	0.388885	0.20652	0.2009	0.210267	0.00936667	0.959638	4.3e-10	FALSE	yes	1	TRUE	no	0	NA
ENST00000495851.5	ENSG00000115159.15	GPD2	protein_coding	processed_transcript	49.4061	46.5883	51.2847	0.706675	0.384009	0.138532	0.116025	1.2748	1.10298	1.38934	0.130619	0.220895	0.330315	NA	0.02572	0.02365	0.0271	0.00345	0.959638	4.3e-10	NA	NA	0.286478	NA	NA	0	NA
ENST00000246912.8	ENSG00000108788.11	MLX	protein_coding	protein_coding	50.4102	48.6538	51.5812	4.08536	0.234332	0.0842775	0.60158	2.63919	1.13892	3.63937	0.196631	0.076861	1.66736	6.09e-09	0.05162	0.0232	0.0705667	0.0473667	4.81e-10	4.81e-10	FALSE	yes	0.999959	TRUE	no	NA	NA
ENST00000592717.1	ENSG00000108788.11	MLX	protein_coding	retained_intron	50.4102	48.6538	51.5812	4.08536	0.234332	0.0842775	0.60158	0.978572	0.535048	1.27426	0.0864643	0.0892955	1.23648	NA	0.0193	0.0112	0.0247	0.0135	0.0614129	4.81e-10	NA	NA	0.114097	FALSE	NA	NA	NA
ENST00000590050.5	ENSG00000108788.11	MLX	protein_coding	retained_intron	50.4102	48.6538	51.5812	4.08536	0.234332	0.0842775	0.60158	3.29097	3.62956	3.06524	0.0508586	0.37898	-0.243066	0.695842	0.06572	0.07505	0.0595	-0.01555	0.812288	4.81e-10	NA	NA	0.949778	TRUE	NA	NA	NA
ENST00000585403.5	ENSG00000108788.11	MLX	protein_coding	retained_intron	50.4102	48.6538	51.5812	4.08536	0.234332	0.0842775	0.60158	1.54995	1.74289	1.42132	0.489837	0.109147	-0.292384	NA	0.0306	0.0352	0.0275333	-0.00766667	0.882482	4.81e-10	NA	NA	0.465186	NA	NA	NA	NA
ENST00000435881.6	ENSG00000108788.11	MLX	protein_coding	protein_coding	50.4102	48.6538	51.5812	4.08536	0.234332	0.0842775	0.60158	32.4124	32.3511	32.4533	3.26032	1.35074	0.00454859	0.991863	0.64296	0.66395	0.628967	-0.0349833	0.893898	4.81e-10	FALSE	yes	0.999883	TRUE	no	NA	NA
ENST00000346833.8	ENSG00000108788.11	MLX	protein_coding	protein_coding	50.4102	48.6538	51.5812	4.08536	0.234332	0.0842775	0.60158	2.47433	2.14006	2.69718	1.55894	0.567239	0.332413	0.884908	0.0502	0.047	0.0523333	0.00533333	0.959638	4.81e-10	FALSE	yes	0.999635	TRUE	no	NA	NA
ENST00000588320.1	ENSG00000108788.11	MLX	protein_coding	retained_intron	50.4102	48.6538	51.5812	4.08536	0.234332	0.0842775	0.60158	1.13305	1.24697	1.05709	0.17649	0.318551	-0.236266	0.910593	0.02274	0.0261	0.0205	-0.0056	0.959638	4.81e-10	NA	NA	0.0820522	FALSE	NA	NA	NA
ENST00000590084.5	ENSG00000108788.11	MLX	protein_coding	retained_intron	50.4102	48.6538	51.5812	4.08536	0.234332	0.0842775	0.60158	1.80018	1.46278	2.02511	0.239801	0.692985	0.46657	NA	0.03544	0.02985	0.0391667	0.00931667	0.959638	4.81e-10	NA	NA	0.19207	FALSE	NA	NA	NA
ENST00000591024.1	ENSG00000108788.11	MLX	protein_coding	protein_coding	50.4102	48.6538	51.5812	4.08536	0.234332	0.0842775	0.60158	4.08933	4.40646	3.87791	1.6698	1.09602	-0.183898	0.929571	0.08054	0.0883	0.0753667	-0.0129333	0.959638	4.81e-10	FALSE	yes	0.382586	NA	no	NA	NA
ENST00000505278.1	ENSG00000114554.11	PLXNA1	protein_coding	processed_transcript	16.7338	18.891	15.2957	0.325756	0.714054	-0.304392	0.00606568	0.974091	2.43523	0	0.722454	0	-7.93382	NA	0.05132	0.1283	0	-0.1283	6.02e-10	6.02e-10	NA	NA	0.0555283	FALSE	NA	0	TRUE
ENST00000393409.2	ENSG00000114554.11	PLXNA1	protein_coding	protein_coding	16.7338	18.891	15.2957	0.325756	0.714054	-0.304392	0.00606568	15.3358	16.1867	14.7686	0.257955	0.634836	-0.132195	0.402097	0.92256	0.85735	0.966033	0.108683	0.00766259	6.02e-10	FALSE	yes	1	TRUE	yes	0	TRUE
ENST00000503363.1	ENSG00000114554.11	PLXNA1	protein_coding	retained_intron	16.7338	18.891	15.2957	0.325756	0.714054	-0.304392	0.00606568	0.229805	0.0968532	0.31844	0.0968532	0.225386	1.62	NA	0.01408	0.0052	0.02	0.0148	0.950876	6.02e-10	NA	NA	0.0695406	FALSE	NA	0	TRUE
ENST00000503234.5	ENSG00000114554.11	PLXNA1	protein_coding	retained_intron	16.7338	18.891	15.2957	0.325756	0.714054	-0.304392	0.00606568	0.194111	0.172207	0.208713	0.0418898	0.0471959	0.263465	NA	0.01206	0.00915	0.014	0.00485	0.959638	6.02e-10	NA	NA	1	TRUE	NA	0	TRUE
ENST00000557932.5	ENSG00000185596.16	WASH3P	transcribed_unprocessed_pseudogene	processed_transcript	25.4231	23.8484	26.4729	0.450705	0.258541	0.150564	0.505896	5.88897	7.70479	4.67842	0.394917	0.173611	-0.718523	0.00186243	0.23512	0.32285	0.176633	-0.146217	6.33e-10	6.33e-10	NA	NA	0.999995	TRUE	NA	0	TRUE
ENST00000558784.5	ENSG00000185596.16	WASH3P	transcribed_unprocessed_pseudogene	processed_transcript	25.4231	23.8484	26.4729	0.450705	0.258541	0.150564	0.505896	9.14776	6.71981	10.7664	0.317305	0.766932	0.679235	0.00228686	0.35674	0.2816	0.406833	0.125233	0.0532971	6.33e-10	NA	NA	0.0912289	FALSE	NA	0	TRUE
ENST00000558686.5	ENSG00000185596.16	WASH3P	transcribed_unprocessed_pseudogene	processed_transcript	25.4231	23.8484	26.4729	0.450705	0.258541	0.150564	0.505896	1.63759	1.19081	1.93544	0.242672	0.150247	0.696083	NA	0.06376	0.04975	0.0731	0.02335	0.5781	6.33e-10	NA	NA	0.0475384	FALSE	NA	0	TRUE
ENST00000559163.6	ENSG00000185596.16	WASH3P	transcribed_unprocessed_pseudogene	processed_transcript	25.4231	23.8484	26.4729	0.450705	0.258541	0.150564	0.505896	0.594288	0.94351	0.361473	0.19927	0.186834	-1.35999	NA	0.02396	0.0394	0.0136667	-0.0257333	0.76743	6.33e-10	NA	NA	0.318523	NA	NA	0	TRUE
ENST00000559884.5	ENSG00000185596.16	WASH3P	transcribed_unprocessed_pseudogene	processed_transcript	25.4231	23.8484	26.4729	0.450705	0.258541	0.150564	0.505896	4.78053	4.21467	5.15778	0.505649	0.417179	0.290704	NA	0.18766	0.17715	0.194667	0.0175167	0.959638	6.33e-10	NA	NA	0.33043	NA	NA	0	TRUE
ENST00000354296.9	ENSG00000185596.16	WASH3P	transcribed_unprocessed_pseudogene	processed_transcript	25.4231	23.8484	26.4729	0.450705	0.258541	0.150564	0.505896	3.37397	3.07481	3.57341	0.197811	0.397945	0.216152	0.846419	0.13274	0.12915	0.135133	0.00598333	0.963714	6.33e-10	NA	NA	0.832127	TRUE	NA	0	TRUE
ENST00000491337.6	ENSG00000197472.14	ZNF695	protein_coding	nonsense_mediated_decay	6.59409	6.89119	6.39602	0.224974	0.897058	-0.107416	0.880313	0.507229	0	0.845381	0	0.193568	6.4185	NA	0.07728	0	0.1288	0.1288	6.38e-10	6.38e-10	TRUE	yes	0.275924	NA	no	0	TRUE
ENST00000339986.7	ENSG00000197472.14	ZNF695	protein_coding	protein_coding	6.59409	6.89119	6.39602	0.224974	0.897058	-0.107416	0.880313	1.71733	2.14964	1.42913	0.174837	0.13618	-0.585597	0.173678	0.26044	0.3114	0.226467	-0.0849333	0.334636	6.38e-10	FALSE	yes	1	TRUE	no	0	TRUE
ENST00000487338.6	ENSG00000197472.14	ZNF695	protein_coding	protein_coding	6.59409	6.89119	6.39602	0.224974	0.897058	-0.107416	0.880313	0.835311	1.38298	0.470195	0.230941	0.23572	-1.53649	NA	0.12074	0.202	0.0665667	-0.135433	0.706103	6.38e-10	FALSE	yes	0.981804	TRUE	no	0	TRUE
ENST00000479214.5	ENSG00000197472.14	ZNF695	protein_coding	nonsense_mediated_decay	6.59409	6.89119	6.39602	0.224974	0.897058	-0.107416	0.880313	2.73748	2.59108	2.83508	0.375689	0.561488	0.129359	NA	0.41166	0.3746	0.436367	0.0617667	0.921523	6.38e-10	TRUE	yes	0.628835	TRUE	no	0	TRUE
ENST00000366504.6	ENSG00000197472.14	ZNF695	protein_coding	nonsense_mediated_decay	6.59409	6.89119	6.39602	0.224974	0.897058	-0.107416	0.880313	0.796739	0.767486	0.816241	0.094611	0.409164	0.0877454	NA	0.12984	0.11195	0.141767	0.0298167	0.971309	6.38e-10	TRUE	yes	0.782432	TRUE	no	0	TRUE
ENST00000578112.5	ENSG00000073584.18	SMARCE1	protein_coding	nonsense_mediated_decay	139.506	145.305	135.64	0.311785	1.53561	-0.0992851	0.419119	62.8763	68.4649	59.1506	0.790265	0.930755	-0.210938	0.00160104	0.45018	0.47115	0.4362	-0.03495	0.0492887	6.58e-10	TRUE	no	1	TRUE	no	NA	NA
ENST00000377808.8	ENSG00000073584.18	SMARCE1	protein_coding	protein_coding	139.506	145.305	135.64	0.311785	1.53561	-0.0992851	0.419119	1.61288	0.0405243	2.66112	0.0104511	0.49574	5.72432	NA	0.01184	0.0003	0.0195333	0.0192333	6.58e-10	6.58e-10	FALSE	yes	1	TRUE	no	NA	NA
ENST00000481231.5	ENSG00000073584.18	SMARCE1	protein_coding	nonsense_mediated_decay	139.506	145.305	135.64	0.311785	1.53561	-0.0992851	0.419119	9.74153	7.7275	11.0842	0.499923	0.836475	0.519868	0.247413	0.07036	0.05315	0.0818333	0.0286833	0.0722329	6.58e-10	TRUE	no	0.0431398	FALSE	no	NA	NA
ENST00000578995.5	ENSG00000073584.18	SMARCE1	protein_coding	retained_intron	139.506	145.305	135.64	0.311785	1.53561	-0.0992851	0.419119	2.80653	1.9612	3.37007	0.00644733	0.534621	0.777979	NA	0.02036	0.0135	0.0249333	0.0114333	0.296335	6.58e-10	NA	NA	0.0628298	FALSE	NA	NA	NA
ENST00000580419.5	ENSG00000073584.18	SMARCE1	protein_coding	protein_coding	139.506	145.305	135.64	0.311785	1.53561	-0.0992851	0.419119	3.30337	5.90332	1.57007	0.0411457	1.21261	-1.90398	0.74229	0.02316	0.04065	0.0115	-0.02915	0.735848	6.58e-10	FALSE	yes	1	TRUE	no	NA	NA
ENST00000578044.5	ENSG00000073584.18	SMARCE1	protein_coding	protein_coding	139.506	145.305	135.64	0.311785	1.53561	-0.0992851	0.419119	26.3159	24.9715	27.2121	2.13448	1.80565	0.123923	0.732632	0.18914	0.17185	0.200667	0.0288167	0.815977	6.58e-10	FALSE	yes	1	TRUE	no	NA	NA
ENST00000580654.5	ENSG00000073584.18	SMARCE1	protein_coding	protein_coding	139.506	145.305	135.64	0.311785	1.53561	-0.0992851	0.419119	8.43874	9.40505	7.79454	1.36114	0.397362	-0.270656	0.776828	0.06036	0.06475	0.0574333	-0.00731667	0.916254	6.58e-10	FALSE	yes	0.132515	FALSE	no	NA	NA
ENST00000474246.1	ENSG00000073584.18	SMARCE1	protein_coding	protein_coding	139.506	145.305	135.64	0.311785	1.53561	-0.0992851	0.419119	2.23029	2.47586	2.06657	0.100407	0.0981818	-0.25954	0.676753	0.01596	0.01705	0.0152333	-0.00181667	0.91698	6.58e-10	FALSE	no	0.0609392	FALSE	no	NA	NA
ENST00000469334.5	ENSG00000073584.18	SMARCE1	protein_coding	retained_intron	139.506	145.305	135.64	0.311785	1.53561	-0.0992851	0.419119	6.76938	6.55059	6.91523	0.00535439	1.11821	0.0780363	0.931653	0.04858	0.04505	0.0509333	0.00588333	0.959638	6.58e-10	NA	NA	0.999544	TRUE	NA	NA	NA
ENST00000348513.10	ENSG00000073584.18	SMARCE1	protein_coding	protein_coding	139.506	145.305	135.64	0.311785	1.53561	-0.0992851	0.419119	2.25059	2.24852	2.25196	0.0871628	0.107776	0.00219877	0.989227	0.01614	0.01545	0.0166	0.00115	0.962846	6.58e-10	FALSE	yes	1	TRUE	no	NA	NA
ENST00000582955.5	ENSG00000073584.18	SMARCE1	protein_coding	protein_coding	139.506	145.305	135.64	0.311785	1.53561	-0.0992851	0.419119	11.3339	11.8943	10.9602	2.52152	1.04698	-0.117889	0.916043	0.08116	0.0818	0.0807333	-0.00106667	0.980696	6.58e-10	FALSE	yes	0.130319	FALSE	no	NA	NA
ENST00000506627.5	ENSG00000171566.11	PLRG1	protein_coding	nonsense_mediated_decay	38.6105	40.4629	37.3756	1.38787	0.728744	-0.114476	0.593998	1.40316	0	2.33861	0	0.584089	7.87566	NA	0.03756	0	0.0626	0.0626	7.93e-10	7.93e-10	NA	no	0.124928	FALSE	no	NA	NA
ENST00000512773.1	ENSG00000171566.11	PLRG1	protein_coding	retained_intron	38.6105	40.4629	37.3756	1.38787	0.728744	-0.114476	0.593998	3.41027	4.73889	2.52453	1.53108	0.846559	-0.905871	NA	0.08734	0.11595	0.0682667	-0.0476833	0.812288	7.93e-10	NA	NA	0.252619	NA	NA	NA	NA
ENST00000512719.5	ENSG00000171566.11	PLRG1	protein_coding	retained_intron	38.6105	40.4629	37.3756	1.38787	0.728744	-0.114476	0.593998	1.15479	1.6429	0.829384	0.62041	0.5549	-0.977594	NA	0.02906	0.04015	0.0216667	-0.0184833	0.930294	7.93e-10	NA	NA	0.873791	TRUE	NA	NA	NA
ENST00000499023.6	ENSG00000171566.11	PLRG1	protein_coding	protein_coding	38.6105	40.4629	37.3756	1.38787	0.728744	-0.114476	0.593998	5.54377	6.04654	5.2086	0.439243	0.56583	-0.21483	0.650546	0.14402	0.15	0.140033	-0.00996667	0.959638	7.93e-10	FALSE	yes	1	TRUE	no	NA	NA
ENST00000504341.1	ENSG00000171566.11	PLRG1	protein_coding	protein_coding	38.6105	40.4629	37.3756	1.38787	0.728744	-0.114476	0.593998	5.29285	5.0306	5.46769	0.760208	1.12976	0.119973	0.941202	0.13688	0.12385	0.145567	0.0217167	0.959638	7.93e-10	FALSE	no	0.310562	NA	no	NA	NA
ENST00000515520.1	ENSG00000171566.11	PLRG1	protein_coding	retained_intron	38.6105	40.4629	37.3756	1.38787	0.728744	-0.114476	0.593998	2.11036	2.39831	1.91839	0.29319	0.447885	-0.320622	NA	0.05464	0.0591	0.0516667	-0.00743333	0.959638	7.93e-10	NA	NA	0.712882	TRUE	NA	NA	NA
ENST00000503751.5	ENSG00000171566.11	PLRG1	protein_coding	retained_intron	38.6105	40.4629	37.3756	1.38787	0.728744	-0.114476	0.593998	1.84957	1.91607	1.80524	0.549929	0.398487	-0.0855028	NA	0.04806	0.04785	0.0482	0.00035	0.99152	7.93e-10	NA	NA	0.436288	NA	NA	NA	NA
ENST00000302078.9	ENSG00000171566.11	PLRG1	protein_coding	protein_coding	38.6105	40.4629	37.3756	1.38787	0.728744	-0.114476	0.593998	17.3551	18.1797	16.8054	0.756339	1.10577	-0.113342	0.779938	0.44986	0.45045	0.449467	-0.000983333	0.99886	7.93e-10	FALSE	yes	1	TRUE	no	NA	NA
ENST00000581723.5	ENSG00000177728.16	TMEM94	protein_coding	retained_intron	67.1164	59.4693	72.2144	3.23324	3.48162	0.2801	0.0108217	2.10785	0	3.51308	0	0.965513	8.4607	NA	0.0292	0	0.0486667	0.0486667	9.68e-10	9.68e-10	NA	NA	0.208881	FALSE	NA	NA	NA
ENST00000582186.5	ENSG00000177728.16	TMEM94	protein_coding	protein_coding	67.1164	59.4693	72.2144	3.23324	3.48162	0.2801	0.0108217	2.17125	2.6614	1.84449	0.275748	0.263316	-0.526571	NA	0.03306	0.0446	0.0253667	-0.0192333	0.0617681	9.68e-10	FALSE	no	0.0138802	FALSE	yes	NA	NA
ENST00000583296.1	ENSG00000177728.16	TMEM94	protein_coding	retained_intron	67.1164	59.4693	72.2144	3.23324	3.48162	0.2801	0.0108217	1.45202	2.03596	1.06273	0.119284	0.304362	-0.931495	NA	0.02238	0.03425	0.0144667	-0.0197833	0.157633	9.68e-10	NA	NA	0.0909889	FALSE	NA	NA	NA
ENST00000577247.5	ENSG00000177728.16	TMEM94	protein_coding	protein_coding	67.1164	59.4693	72.2144	3.23324	3.48162	0.2801	0.0108217	8.03079	6.4341	9.09526	0.633097	0.90763	0.498722	0.267429	0.11836	0.10795	0.1253	0.01735	0.671317	9.68e-10	FALSE	yes	0.999934	TRUE	no	NA	NA
ENST00000578853.1	ENSG00000177728.16	TMEM94	protein_coding	protein_coding	67.1164	59.4693	72.2144	3.23324	3.48162	0.2801	0.0108217	4.37617	3.51552	4.94993	0.885188	0.230816	0.492485	0.505171	0.06476	0.0585	0.0689333	0.0104333	0.895039	9.68e-10	NA	no	0.30834	NA	no	NA	NA
ENST00000579241.1	ENSG00000177728.16	TMEM94	protein_coding	retained_intron	67.1164	59.4693	72.2144	3.23324	3.48162	0.2801	0.0108217	2.8037	2.96586	2.69559	0.733138	0.589291	-0.137366	NA	0.0427	0.04935	0.0382667	-0.0110833	0.938856	9.68e-10	NA	NA	0.999826	TRUE	NA	NA	NA
ENST00000580918.1	ENSG00000177728.16	TMEM94	protein_coding	protein_coding	67.1164	59.4693	72.2144	3.23324	3.48162	0.2801	0.0108217	2.30457	2.38863	2.24853	0.343653	0.918636	-0.0868277	NA	0.0344	0.0406	0.0302667	-0.0103333	0.950876	9.68e-10	FALSE	no	0.4084	NA	no	NA	NA
ENST00000577245.1	ENSG00000177728.16	TMEM94	protein_coding	protein_coding	67.1164	59.4693	72.2144	3.23324	3.48162	0.2801	0.0108217	3.07403	3.12869	3.03759	0.592517	0.882396	-0.0424901	NA	0.04692	0.0533	0.0426667	-0.0106333	0.959638	9.68e-10	FALSE	no	0.150509	FALSE	no	NA	NA
ENST00000581085.5	ENSG00000177728.16	TMEM94	protein_coding	retained_intron	67.1164	59.4693	72.2144	3.23324	3.48162	0.2801	0.0108217	7.72367	7.2042	8.06998	1.01579	1.35373	0.163512	0.815483	0.11478	0.12055	0.110933	-0.00961667	0.959638	9.68e-10	NA	NA	1	TRUE	NA	NA	NA
ENST00000583071.1	ENSG00000177728.16	TMEM94	protein_coding	retained_intron	67.1164	59.4693	72.2144	3.23324	3.48162	0.2801	0.0108217	0.776225	0.910706	0.686572	0.492708	0.188603	-0.402469	NA	0.01158	0.0149	0.00936667	-0.00553333	0.959638	9.68e-10	NA	NA	0.858461	TRUE	NA	NA	NA
ENST00000579898.5	ENSG00000177728.16	TMEM94	protein_coding	retained_intron	67.1164	59.4693	72.2144	3.23324	3.48162	0.2801	0.0108217	5.19308	4.72583	5.50459	0.0157044	0.160239	0.219635	0.418222	0.07774	0.0797	0.0764333	-0.00326667	0.960504	9.68e-10	NA	NA	1	TRUE	NA	NA	NA
ENST00000314256.11	ENSG00000177728.16	TMEM94	protein_coding	protein_coding	67.1164	59.4693	72.2144	3.23324	3.48162	0.2801	0.0108217	16.0917	14.6575	17.0478	0.533153	0.766519	0.21781	0.130204	0.24204	0.2477	0.238267	-0.00943333	0.970086	9.68e-10	FALSE	no	1	TRUE	no	NA	NA
ENST00000580441.5	ENSG00000177728.16	TMEM94	protein_coding	nonsense_mediated_decay	67.1164	59.4693	72.2144	3.23324	3.48162	0.2801	0.0108217	0.813556	0.679827	0.902709	0.2989	0.321443	0.40392	NA	0.01208	0.01175	0.0123	0.00055	0.977942	9.68e-10	NA	no	0.0995346	FALSE	no	NA	NA
ENST00000582455.5	ENSG00000177728.16	TMEM94	protein_coding	protein_coding	67.1164	59.4693	72.2144	3.23324	3.48162	0.2801	0.0108217	1.82677	1.68941	1.91834	0.455807	0.2112	0.182323	NA	0.0271	0.02805	0.0264667	-0.00158333	0.983397	9.68e-10	FALSE	no	0.0333658	FALSE	no	NA	NA
ENST00000581453.1	ENSG00000177728.16	TMEM94	protein_coding	retained_intron	67.1164	59.4693	72.2144	3.23324	3.48162	0.2801	0.0108217	0.751046	0.359194	1.01228	0.0384138	0.667317	1.46934	NA	0.0105	0.0061	0.0134333	0.00733333	0.984643	9.68e-10	NA	NA	0.78394	TRUE	NA	NA	NA
ENST00000585105.5	ENSG00000177728.16	TMEM94	protein_coding	retained_intron	67.1164	59.4693	72.2144	3.23324	3.48162	0.2801	0.0108217	1.3671	1.20713	1.47375	0.106063	0.178293	0.285767	0.615597	0.02032	0.02025	0.0203667	0.000116667	0.988611	9.68e-10	NA	NA	1	TRUE	NA	NA	NA
ENST00000578624.1	ENSG00000177728.16	TMEM94	protein_coding	retained_intron	67.1164	59.4693	72.2144	3.23324	3.48162	0.2801	0.0108217	3.41056	3.01652	3.67325	0.121115	0.500132	0.283321	NA	0.05116	0.05075	0.0514333	0.000683333	0.993364	9.68e-10	NA	NA	0.0843707	FALSE	NA	NA	NA
ENST00000634731.1	ENSG00000282851.1	BISPR	lincRNA	lincRNA	14.1127	14.6071	13.7832	0.650027	0.977225	-0.0837022	0.870139	0.34136	0.853399	0	0.502546	0	-6.43196	NA	0.02404	0.0601	0	-0.0601	0.00910341	9.83e-10	NA	NA	0.012417	FALSE	NA	NA	NA
ENST00000635572.1	ENSG00000282851.1	BISPR	lincRNA	lincRNA	14.1127	14.6071	13.7832	0.650027	0.977225	-0.0837022	0.870139	0.500789	0	0.834648	0	0.105835	6.40028	NA	0.0361	0	0.0601667	0.0601667	9.83e-10	9.83e-10	NA	NA	0.0103899	FALSE	NA	NA	NA
ENST00000634577.1	ENSG00000282851.1	BISPR	lincRNA	lincRNA	14.1127	14.6071	13.7832	0.650027	0.977225	-0.0837022	0.870139	1.91473	2.43312	1.56914	0.373711	0.234683	-0.629585	NA	0.13438	0.1658	0.113433	-0.0523667	0.525802	9.83e-10	NA	NA	0.01422	FALSE	NA	NA	NA
ENST00000635536.1	ENSG00000282851.1	BISPR	lincRNA	lincRNA	14.1127	14.6071	13.7832	0.650027	0.977225	-0.0837022	0.870139	0.889576	0.606413	1.07835	0.0150987	0.447359	0.820174	NA	0.06478	0.04155	0.0802667	0.0387167	0.947837	9.83e-10	NA	NA	0.0233199	FALSE	NA	NA	NA
ENST00000635339.1	ENSG00000282851.1	BISPR	lincRNA	lincRNA	14.1127	14.6071	13.7832	0.650027	0.977225	-0.0837022	0.870139	3.21083	3.04781	3.31951	0.591834	0.618896	0.12281	NA	0.22752	0.2109	0.2386	0.0277	0.959638	9.83e-10	NA	NA	0.0105314	FALSE	NA	NA	NA
ENST00000635176.1	ENSG00000282851.1	BISPR	lincRNA	lincRNA	14.1127	14.6071	13.7832	0.650027	0.977225	-0.0837022	0.870139	0.331675	0.325793	0.335596	0.325793	0.335596	0.0415165	NA	0.0241	0.02135	0.0259333	0.00458333	0.961765	9.83e-10	NA	NA	0.0120778	FALSE	NA	NA	NA
ENST00000634813.1	ENSG00000282851.1	BISPR	lincRNA	lincRNA	14.1127	14.6071	13.7832	0.650027	0.977225	-0.0837022	0.870139	0.210035	0.210512	0.209717	0.210512	0.107723	-0.00520874	NA	0.01426	0.0138	0.0145667	0.000766667	0.962098	9.83e-10	NA	NA	0.0133893	FALSE	NA	NA	NA
ENST00000635060.1	ENSG00000282851.1	BISPR	lincRNA	lincRNA	14.1127	14.6071	13.7832	0.650027	0.977225	-0.0837022	0.870139	0.441491	0.592463	0.340843	0.470122	0.0513159	-0.780046	NA	0.03096	0.0392	0.0254667	-0.0137333	0.976103	9.83e-10	NA	NA	0.028273	FALSE	NA	NA	NA
ENST00000634675.1	ENSG00000282851.1	BISPR	lincRNA	lincRNA	14.1127	14.6071	13.7832	0.650027	0.977225	-0.0837022	0.870139	6.17132	6.34567	6.0551	0.330573	0.591379	-0.0675135	0.923382	0.43676	0.4343	0.4384	0.0041	0.999778	9.83e-10	NA	NA	0.0200179	FALSE	NA	NA	NA
ENST00000526433.1	ENSG00000173465.7	SSSCA1	protein_coding	protein_coding	85.5814	78.6297	90.2159	5.00055	3.87388	0.198284	0.268997	10.5307	6.75893	13.0452	0.724253	0.717034	0.947624	0.00324522	0.12098	0.08575	0.144467	0.0587167	1.19e-09	1.19e-09	FALSE	no	0.219944	FALSE	no	NA	NA
ENST00000531405.5	ENSG00000173465.7	SSSCA1	protein_coding	protein_coding	85.5814	78.6297	90.2159	5.00055	3.87388	0.198284	0.268997	9.00414	9.90918	8.40079	0.87721	0.413473	-0.237981	0.657716	0.10666	0.12585	0.0938667	-0.0319833	0.300599	1.19e-09	FALSE	yes	0.989545	TRUE	no	NA	NA
ENST00000527413.1	ENSG00000173465.7	SSSCA1	protein_coding	retained_intron	85.5814	78.6297	90.2159	5.00055	3.87388	0.198284	0.268997	1.76092	2.08278	1.54635	0.0378007	0.314224	-0.42725	NA	0.02088	0.0266	0.0170667	-0.00953333	0.616473	1.19e-09	NA	NA	0.29811	NA	NA	NA	NA
ENST00000309328.7	ENSG00000173465.7	SSSCA1	protein_coding	protein_coding	85.5814	78.6297	90.2159	5.00055	3.87388	0.198284	0.268997	64.2169	59.8227	67.1464	3.30522	3.47823	0.16659	0.521571	0.75074	0.7612	0.743767	-0.0174333	0.821513	1.19e-09	FALSE	yes	0.999423	TRUE	no	NA	NA
ENST00000244061.5	ENSG00000124226.10	RNF114	protein_coding	protein_coding	271.707	252.914	284.236	2.59504	4.3163	0.168434	0.0161992	205.175	204.249	205.792	0.212962	2.5574	0.0108541	0.915224	0.75758	0.80765	0.7242	-0.08345	1.22e-09	1.22e-09	FALSE	yes	0.979562	TRUE	no	NA	NA
ENST00000625177.3	ENSG00000124226.10	RNF114	protein_coding	protein_coding	271.707	252.914	284.236	2.59504	4.3163	0.168434	0.0161992	52.8933	35.8465	64.2577	4.18953	2.58166	0.841859	4.79e-06	0.1922	0.1416	0.225933	0.0843333	2.7e-05	1.22e-09	FALSE	yes	0.160447	FALSE	no	NA	NA
ENST00000624620.1	ENSG00000124226.10	RNF114	protein_coding	retained_intron	271.707	252.914	284.236	2.59504	4.3163	0.168434	0.0161992	3.51762	2.82219	3.98123	0.987076	0.742029	0.494916	NA	0.01286	0.0112	0.0139667	0.00276667	0.958657	1.22e-09	NA	NA	0.390753	NA	NA	NA	NA
ENST00000624666.1	ENSG00000124226.10	RNF114	protein_coding	retained_intron	271.707	252.914	284.236	2.59504	4.3163	0.168434	0.0161992	6.74038	5.88384	7.31141	0.551815	0.601901	0.312913	0.408336	0.02476	0.0233	0.0257333	0.00243333	0.959638	1.22e-09	NA	NA	0.41776	NA	NA	NA	NA
ENST00000585747.1	ENSG00000066926.10	FECH	protein_coding	protein_coding	37.2818	35.2367	38.6451	0.21154	0.574355	0.133169	0.33603	7.04397	3.68638	9.28237	0.403567	0.300575	1.32993	0.00237986	0.18616	0.1047	0.240467	0.135767	1.23e-09	1.23e-09	FALSE	yes	0.253982	NA	no	0	NA
ENST00000262093.9	ENSG00000066926.10	FECH	protein_coding	protein_coding	37.2818	35.2367	38.6451	0.21154	0.574355	0.133169	0.33603	6.40442	7.18531	5.88383	0.338656	0.436167	-0.287852	0.295804	0.17274	0.2039	0.151967	-0.0519333	0.100507	1.23e-09	FALSE	yes	0.999793	TRUE	no	0	NA
ENST00000591977.5	ENSG00000066926.10	FECH	protein_coding	protein_coding	37.2818	35.2367	38.6451	0.21154	0.574355	0.133169	0.33603	0.546251	1.07869	0.19129	0.246668	0.19129	-2.43525	NA	0.01512	0.0306	0.0048	-0.0258	0.504402	1.23e-09	NA	no	0.867177	TRUE	no	0	NA
ENST00000592699.5	ENSG00000066926.10	FECH	protein_coding	protein_coding	37.2818	35.2367	38.6451	0.21154	0.574355	0.133169	0.33603	5.60377	5.91806	5.39425	1.10635	0.544792	-0.133465	0.893298	0.15076	0.1678	0.1394	-0.0284	0.883241	1.23e-09	FALSE	yes	0.656976	TRUE	no	0	NA
ENST00000585494.5	ENSG00000066926.10	FECH	protein_coding	nonsense_mediated_decay	37.2818	35.2367	38.6451	0.21154	0.574355	0.133169	0.33603	0.832367	0.906912	0.782671	0.255327	0.126975	-0.210061	NA	0.0224	0.0257	0.0202	-0.0055	0.950876	1.23e-09	TRUE	yes	0.999991	TRUE	no	0	NA
ENST00000382873.7	ENSG00000066926.10	FECH	protein_coding	protein_coding	37.2818	35.2367	38.6451	0.21154	0.574355	0.133169	0.33603	15.8063	15.2023	16.2089	1.39812	0.571212	0.0924456	0.749978	0.42454	0.4317	0.419767	-0.0119333	0.959638	1.23e-09	FALSE	yes	1	TRUE	no	0	NA
ENST00000592111.1	ENSG00000066926.10	FECH	protein_coding	retained_intron	37.2818	35.2367	38.6451	0.21154	0.574355	0.133169	0.33603	0.676446	0.58212	0.739329	0.10095	0.17022	0.33971	NA	0.01814	0.0165	0.0192333	0.00273333	0.96983	1.23e-09	NA	NA	0.37316	NA	NA	0	NA
ENST00000377047.8	ENSG00000183098.10	GPC6	protein_coding	protein_coding	2.81417	3.19339	2.56135	0.124677	0.217103	-0.317076	0.338466	2.17073	3.12322	1.53574	0.054506	0.0438298	-1.01935	3.16e-11	0.75552	0.97885	0.606633	-0.372217	1.56e-09	1.56e-09	FALSE	yes	1	TRUE	yes	0	TRUE
ENST00000452464.6	ENSG00000138760.9	SCARB2	protein_coding	protein_coding	94.6763	85.1933	100.998	0.557452	2.99271	0.245492	0.00191345	2.60126	0	4.33543	0	1.22787	8.76335	3.12e-07	0.02538	0	0.0423	0.0423	1.56e-09	1.56e-09	FALSE	yes	1	TRUE	no	NA	NA
ENST00000617456.1	ENSG00000183098.10	GPC6	protein_coding	protein_coding	2.81417	3.19339	2.56135	0.124677	0.217103	-0.317076	0.338466	0.643435	0.0701707	1.02561	0.0701707	0.194864	3.69126	NA	0.24448	0.02115	0.393367	0.372217	1.07e-07	1.56e-09	FALSE	yes	0.999992	TRUE	no	0	TRUE
ENST00000640900.1	ENSG00000138760.9	SCARB2	protein_coding	retained_intron	94.6763	85.1933	100.998	0.557452	2.99271	0.245492	0.00191345	5.90285	2.7635	7.99575	1.64077	0.413497	1.52933	NA	0.06054	0.03235	0.0793333	0.0469833	0.288465	1.56e-09	NA	NA	0.0414505	FALSE	NA	NA	NA
ENST00000639715.1	ENSG00000138760.9	SCARB2	protein_coding	nonsense_mediated_decay	94.6763	85.1933	100.998	0.557452	2.99271	0.245492	0.00191345	14.6083	16.6308	13.26	2.81649	0.868426	-0.32656	0.283418	0.15692	0.19545	0.131233	-0.0642167	0.333514	1.56e-09	NA	no	1	TRUE	no	NA	NA
ENST00000639145.1	ENSG00000138760.9	SCARB2	protein_coding	protein_coding	94.6763	85.1933	100.998	0.557452	2.99271	0.245492	0.00191345	1.28932	1.69581	1.01833	0.302423	0.27174	-0.730153	0.448653	0.01412	0.0199	0.0102667	-0.00963333	0.632172	1.56e-09	FALSE	yes	1	TRUE	no	NA	NA
ENST00000640957.1	ENSG00000138760.9	SCARB2	protein_coding	protein_coding	94.6763	85.1933	100.998	0.557452	2.99271	0.245492	0.00191345	1.58525	1.63319	1.55329	0.0693868	0.123315	-0.0719158	0.929227	0.01696	0.0192	0.0154667	-0.00373333	0.855219	1.56e-09	FALSE	yes	1	TRUE	no	NA	NA
ENST00000264896.7	ENSG00000138760.9	SCARB2	protein_coding	protein_coding	94.6763	85.1933	100.998	0.557452	2.99271	0.245492	0.00191345	18.2924	18.1527	18.3854	2.03352	1.3231	0.0183663	0.969386	0.19486	0.21295	0.1828	-0.03015	0.86859	1.56e-09	FALSE	yes	1	TRUE	no	NA	NA
ENST00000638295.1	ENSG00000138760.9	SCARB2	protein_coding	protein_coding	94.6763	85.1933	100.998	0.557452	2.99271	0.245492	0.00191345	18.9525	16.2489	20.7549	0.440442	0.793989	0.352915	0.000890237	0.19996	0.1907	0.206133	0.0154333	0.888761	1.56e-09	FALSE	yes	1	TRUE	no	NA	NA
ENST00000638663.1	ENSG00000138760.9	SCARB2	protein_coding	nonsense_mediated_decay	94.6763	85.1933	100.998	0.557452	2.99271	0.245492	0.00191345	26.2552	24.0185	27.7464	0.0600717	2.73763	0.208072	0.511137	0.2772	0.28195	0.274033	-0.00791667	0.972667	1.56e-09	TRUE	yes	1	TRUE	no	NA	NA
ENST00000600794.1	ENSG00000167658.15	EEF2	protein_coding	protein_coding	1439.64	1488.45	1407.11	78.734	59.907	-0.0810827	0.585515	199.529	245.615	168.805	23.4945	1.69587	-0.541013	0.000276772	0.13806	0.16465	0.120333	-0.0443167	7.34e-05	1.99e-09	NA	no	0.0690384	FALSE	no	NA	NA
ENST00000309311.6	ENSG00000167658.15	EEF2	protein_coding	protein_coding	1439.64	1488.45	1407.11	78.734	59.907	-0.0810827	0.585515	1171.62	1168.28	1173.85	53.675	53.9501	0.00686167	0.976921	0.81448	0.7852	0.834	0.0488	1.99e-09	1.99e-09	FALSE	yes	1	TRUE	no	NA	NA
ENST00000598436.1	ENSG00000167658.15	EEF2	protein_coding	retained_intron	1439.64	1488.45	1407.11	78.734	59.907	-0.0810827	0.585515	24.1147	28.3601	21.2845	0.690615	3.01789	-0.413886	0.445512	0.01668	0.01915	0.0150333	-0.00411667	0.680461	1.99e-09	NA	NA	0.133235	FALSE	NA	NA	NA
ENST00000594885.1	ENSG00000167658.15	EEF2	protein_coding	retained_intron	1439.64	1488.45	1407.11	78.734	59.907	-0.0810827	0.585515	15.6389	15.4334	15.7758	0.837919	1.21198	0.0316392	0.96375	0.0109	0.0104	0.0112333	0.000833333	0.925431	1.99e-09	NA	NA	0.103366	FALSE	NA	NA	NA
ENST00000596417.1	ENSG00000167658.15	EEF2	protein_coding	retained_intron	1439.64	1488.45	1407.11	78.734	59.907	-0.0810827	0.585515	23.9087	25.2993	22.9816	1.97254	4.38846	-0.13856	NA	0.01658	0.01695	0.0163333	-0.000616667	0.962098	1.99e-09	NA	NA	0.0110939	FALSE	NA	NA	NA
ENST00000309234.10	ENSG00000010704.18	HFE	protein_coding	protein_coding	5.7726	5.39234	6.0261	1.29392	0.188173	0.160031	0.711594	0.750456	0	1.25076	0	0.218451	6.97815	NA	0.12358	0	0.205967	0.205967	2.07e-09	2.07e-09	FALSE	yes	1	TRUE	yes	0	FALSE
ENST00000461397.5	ENSG00000010704.18	HFE	protein_coding	protein_coding	5.7726	5.39234	6.0261	1.29392	0.188173	0.160031	0.711594	0.61855	1.17196	0.249609	0.0810875	0.129886	-2.18677	NA	0.11604	0.2268	0.0422	-0.1846	0.434512	2.07e-09	FALSE	yes	1	TRUE	yes	0	FALSE
ENST00000349999.8	ENSG00000010704.18	HFE	protein_coding	protein_coding	5.7726	5.39234	6.0261	1.29392	0.188173	0.160031	0.711594	0.405204	0.64395	0.24604	0.358488	0.142412	-1.35281	NA	0.06908	0.1098	0.0419333	-0.0678667	0.820974	2.07e-09	FALSE	yes	0.999925	TRUE	yes	1	FALSE
ENST00000483782.1	ENSG00000010704.18	HFE	protein_coding	retained_intron	5.7726	5.39234	6.0261	1.29392	0.188173	0.160031	0.711594	0.527121	0.402426	0.61025	0.22911	0.123211	0.588715	NA	0.08866	0.0684	0.102167	0.0337667	0.934419	2.07e-09	NA	NA	0.981181	TRUE	NA	1	FALSE
ENST00000317896.11	ENSG00000010704.18	HFE	protein_coding	protein_coding	5.7726	5.39234	6.0261	1.29392	0.188173	0.160031	0.711594	0.881015	0.626058	1.05099	0.51579	0.168919	0.738173	NA	0.16316	0.14755	0.173567	0.0260167	0.959638	2.07e-09	FALSE	yes	0.999587	TRUE	yes	1	FALSE
ENST00000352392.8	ENSG00000010704.18	HFE	protein_coding	protein_coding	5.7726	5.39234	6.0261	1.29392	0.188173	0.160031	0.711594	0.0774192	0	0.129032	0	0.129032	3.79735	NA	0.01268	0	0.0211333	0.0211333	0.959638	2.07e-09	FALSE	no	0.0834031	FALSE	no	1	FALSE
ENST00000485729.1	ENSG00000010704.18	HFE	protein_coding	protein_coding	5.7726	5.39234	6.0261	1.29392	0.188173	0.160031	0.711594	1.0976	1.17787	1.04409	1.17787	0.334146	-0.172378	NA	0.17448	0.17615	0.173367	-0.00278333	0.959638	2.07e-09	FALSE	no	0.0332842	FALSE	no	0	FALSE
ENST00000357618.9	ENSG00000010704.18	HFE	protein_coding	protein_coding	5.7726	5.39234	6.0261	1.29392	0.188173	0.160031	0.711594	1.27432	1.18657	1.33282	0.146673	0.0812242	0.166359	0.81226	0.22322	0.22655	0.221	-0.00555	0.97164	2.07e-09	FALSE	yes	0.999992	TRUE	yes	1	FALSE
ENST00000486147.1	ENSG00000010704.18	HFE	protein_coding	retained_intron	5.7726	5.39234	6.0261	1.29392	0.188173	0.160031	0.711594	0.114408	0.117243	0.112518	0.117243	0.0132438	-0.0545982	NA	0.02266	0.0286	0.0187	-0.0099	0.989565	2.07e-09	NA	NA	0.981588	TRUE	NA	0	FALSE
ENST00000556825.5	ENSG00000182199.10	SHMT2	protein_coding	nonsense_mediated_decay	148.517	140.625	153.777	7.04027	5.48815	0.12898	0.249122	28.6853	31.9499	26.509	1.24524	0.867001	-0.269241	0.0357397	0.1944	0.22735	0.172433	-0.0549167	2.3e-09	2.3e-09	TRUE	yes	1	TRUE	no	NA	NA
ENST00000555634.5	ENSG00000182199.10	SHMT2	protein_coding	protein_coding	148.517	140.625	153.777	7.04027	5.48815	0.12898	0.249122	7.10735	2.8272	9.96079	0.992089	0.67606	1.81324	3.97e-05	0.04714	0.0205	0.0649	0.0444	0.00453022	2.3e-09	FALSE	yes	0.430781	NA	no	NA	NA
ENST00000414700.7	ENSG00000182199.10	SHMT2	protein_coding	protein_coding	148.517	140.625	153.777	7.04027	5.48815	0.12898	0.249122	38.7105	30.1289	44.4316	1.07823	3.44325	0.560282	0.000432283	0.25864	0.2144	0.288133	0.0737333	0.000501322	2.3e-09	FALSE	yes	1	TRUE	no	NA	NA
ENST00000557433.5	ENSG00000182199.10	SHMT2	protein_coding	nonsense_mediated_decay	148.517	140.625	153.777	7.04027	5.48815	0.12898	0.249122	8.26944	11.3603	6.20887	4.52365	1.64038	-0.870543	0.292752	0.05642	0.0794	0.0411	-0.0383	0.675429	2.3e-09	TRUE	yes	0.999999	TRUE	no	NA	NA
ENST00000556737.1	ENSG00000182199.10	SHMT2	protein_coding	protein_coding	148.517	140.625	153.777	7.04027	5.48815	0.12898	0.249122	3.51336	2.53991	4.16233	0.296992	0.890101	0.710407	NA	0.02332	0.0182	0.0267333	0.00853333	0.731867	2.3e-09	FALSE	yes	0.0963132	FALSE	no	NA	NA
ENST00000557529.1	ENSG00000182199.10	SHMT2	protein_coding	protein_coding	148.517	140.625	153.777	7.04027	5.48815	0.12898	0.249122	5.6003	6.02314	5.31841	0.980876	0.651164	-0.179204	0.834457	0.0378	0.04255	0.0346333	-0.00791667	0.873403	2.3e-09	NA	no	0.999596	TRUE	no	NA	NA
ENST00000553950.5	ENSG00000182199.10	SHMT2	protein_coding	retained_intron	148.517	140.625	153.777	7.04027	5.48815	0.12898	0.249122	1.56274	1.73241	1.44962	0.152174	0.213956	-0.255491	NA	0.01064	0.0124	0.00946667	-0.00293333	0.880013	2.3e-09	NA	NA	0.154589	FALSE	NA	NA	NA
ENST00000557487.5	ENSG00000182199.10	SHMT2	protein_coding	protein_coding	148.517	140.625	153.777	7.04027	5.48815	0.12898	0.249122	19.0417	19.7795	18.5498	2.84551	2.05584	-0.0925544	0.8944	0.12988	0.14205	0.121767	-0.0202833	0.959638	2.3e-09	FALSE	yes	1	TRUE	no	NA	NA
ENST00000554600.5	ENSG00000182199.10	SHMT2	protein_coding	processed_transcript	148.517	140.625	153.777	7.04027	5.48815	0.12898	0.249122	30.5543	29.7695	31.0775	3.40532	3.27414	0.0620169	0.927972	0.2051	0.21105	0.201133	-0.00991667	0.959698	2.3e-09	NA	NA	0.999251	TRUE	NA	NA	NA
ENST00000556798.1	ENSG00000182199.10	SHMT2	protein_coding	retained_intron	148.517	140.625	153.777	7.04027	5.48815	0.12898	0.249122	2.34108	2.26748	2.39015	0.362848	0.091917	0.0756843	NA	0.01576	0.01605	0.0155667	-0.000483333	0.97063	2.3e-09	NA	NA	0.0148095	FALSE	NA	NA	NA
ENST00000554467.5	ENSG00000182199.10	SHMT2	protein_coding	retained_intron	148.517	140.625	153.777	7.04027	5.48815	0.12898	0.249122	2.02321	1.90402	2.10268	0.181052	0.140677	0.142467	0.836825	0.01372	0.01365	0.0137667	0.000116667	0.988137	2.3e-09	NA	NA	0.266321	NA	NA	NA	NA
ENST00000217182.4	ENSG00000101210.10	EEF1A2	protein_coding	protein_coding	1013.46	865.101	1112.36	5.0286	36.7438	0.362678	1.18e-08	608.365	580.09	627.216	1.10114	16.6359	0.112684	0.17817	0.60682	0.67055	0.564333	-0.106217	2.41e-09	2.41e-09	FALSE	yes	1	TRUE	no	0	FALSE
ENST00000629650.2	ENSG00000170836.11	PPM1D	protein_coding	protein_coding	112.43	113.428	111.765	0.563299	3.26748	-0.0212988	0.944808	4.2026	0	7.00434	0	2.56185	9.45416	2.92e-08	0.03728	0	0.0621333	0.0621333	2.41e-09	2.41e-09	FALSE	yes	1	TRUE	no	NA	NA
ENST00000298049.11	ENSG00000101210.10	EEF1A2	protein_coding	protein_coding	1013.46	865.101	1112.36	5.0286	36.7438	0.362678	1.18e-08	405.09	285.011	485.143	3.92745	25.2831	0.76737	5.83e-17	0.39318	0.32945	0.435667	0.106217	2.57e-09	2.41e-09	FALSE	yes	1	TRUE	no	0	FALSE
ENST00000392995.7	ENSG00000170836.11	PPM1D	protein_coding	nonsense_mediated_decay	112.43	113.428	111.765	0.563299	3.26748	-0.0212988	0.944808	67.235	71.5175	64.38	0.153895	2.16147	-0.151661	0.147617	0.59794	0.6305	0.576233	-0.0542667	0.14361	2.41e-09	TRUE	yes	1	TRUE	no	NA	NA
ENST00000305921.7	ENSG00000170836.11	PPM1D	protein_coding	protein_coding	112.43	113.428	111.765	0.563299	3.26748	-0.0212988	0.944808	40.9928	41.9104	40.3811	0.409404	0.769191	-0.0536139	0.676541	0.3648	0.3695	0.361667	-0.00783333	0.959638	2.41e-09	FALSE	yes	1	TRUE	no	NA	NA
ENST00000336458.12	ENSG00000132507.17	EIF5A	protein_coding	protein_coding	681.367	699.923	668.996	23.9988	13.1259	-0.065197	0.62632	79.1879	58.9947	92.65	7.00823	1.055	0.651117	7.47e-07	0.11678	0.08405	0.1386	0.05455	2.43e-09	2.43e-09	FALSE	yes	0.943945	TRUE	no	NA	NA
ENST00000572815.5	ENSG00000132507.17	EIF5A	protein_coding	protein_coding	681.367	699.923	668.996	23.9988	13.1259	-0.065197	0.62632	160.824	177.952	149.405	8.65225	1.51908	-0.25224	0.00317406	0.23614	0.255	0.223567	-0.0314333	0.612781	2.43e-09	FALSE	yes	0.99855	TRUE	no	NA	NA
ENST00000336452.11	ENSG00000132507.17	EIF5A	protein_coding	protein_coding	681.367	699.923	668.996	23.9988	13.1259	-0.065197	0.62632	162.071	174.873	153.536	9.85593	3.92074	-0.187719	0.0902553	0.23806	0.2506	0.2297	-0.0209	0.875141	2.43e-09	FALSE	yes	0.995449	TRUE	no	NA	NA
ENST00000575001.1	ENSG00000132507.17	EIF5A	protein_coding	retained_intron	681.367	699.923	668.996	23.9988	13.1259	-0.065197	0.62632	13.9611	13.825	14.0519	0.489831	0.140914	0.0234655	0.969101	0.02054	0.0198	0.0210333	0.00123333	0.957941	2.43e-09	NA	NA	0.147148	FALSE	NA	NA	NA
ENST00000573542.5	ENSG00000132507.17	EIF5A	protein_coding	protein_coding	681.367	699.923	668.996	23.9988	13.1259	-0.065197	0.62632	25.4374	26.2821	24.8743	4.03802	5.01714	-0.079398	0.945849	0.03716	0.0374	0.037	-0.0004	0.976283	2.43e-09	FALSE	yes	0.988034	TRUE	no	NA	NA
ENST00000419711.6	ENSG00000132507.17	EIF5A	protein_coding	protein_coding	681.367	699.923	668.996	23.9988	13.1259	-0.065197	0.62632	227.575	233.208	223.819	36.3293	12.7526	-0.0592837	0.905217	0.3332	0.3318	0.334133	0.00233333	0.993238	2.43e-09	FALSE	yes	0.987058	TRUE	no	NA	NA
ENST00000509013.2	ENSG00000145687.16	SSBP2	protein_coding	protein_coding	31.7847	31.0828	32.2527	1.51086	0.101083	0.0532866	0.835839	0.392497	0.981241	0	0.0790467	0	-6.63116	NA	0.0126	0.0315	0	-0.0315	2.51e-09	2.51e-09	FALSE	yes	0.26336	NA	no	NA	NA
ENST00000504985.5	ENSG00000145687.16	SSBP2	protein_coding	protein_coding	31.7847	31.0828	32.2527	1.51086	0.101083	0.0532866	0.835839	1.66343	1.24062	1.9453	0.268253	0.0979261	0.644748	NA	0.05202	0.0396	0.0603	0.0207	0.360531	2.51e-09	FALSE	yes	0.999953	TRUE	no	NA	NA
ENST00000507655.5	ENSG00000145687.16	SSBP2	protein_coding	processed_transcript	31.7847	31.0828	32.2527	1.51086	0.101083	0.0532866	0.835839	0.866235	1.43567	0.486614	0.0222288	0.486614	-1.54154	NA	0.02754	0.04625	0.0150667	-0.0311833	0.606669	2.51e-09	NA	NA	0.299178	NA	NA	NA	NA
ENST00000320672.8	ENSG00000145687.16	SSBP2	protein_coding	protein_coding	31.7847	31.0828	32.2527	1.51086	0.101083	0.0532866	0.835839	0.323073	0.450523	0.238106	0.0796209	0.031148	-0.892319	0.141318	0.0102	0.0144	0.0074	-0.007	0.636567	2.51e-09	FALSE	yes	0.999983	TRUE	no	NA	NA
ENST00000509053.5	ENSG00000145687.16	SSBP2	protein_coding	protein_coding	31.7847	31.0828	32.2527	1.51086	0.101083	0.0532866	0.835839	2.00248	0.872571	2.75576	0.220087	1.06232	1.64789	0.16351	0.06252	0.02845	0.0852333	0.0567833	0.688128	2.51e-09	FALSE	yes	0.999987	TRUE	no	NA	NA
ENST00000514493.5	ENSG00000145687.16	SSBP2	protein_coding	protein_coding	31.7847	31.0828	32.2527	1.51086	0.101083	0.0532866	0.835839	5.66832	6.9852	4.7904	0.613281	1.02706	-0.543212	0.451623	0.1797	0.2262	0.1487	-0.0775	0.744041	2.51e-09	FALSE	yes	0.999998	TRUE	no	NA	NA
ENST00000512098.5	ENSG00000145687.16	SSBP2	protein_coding	processed_transcript	31.7847	31.0828	32.2527	1.51086	0.101083	0.0532866	0.835839	9.17541	7.68714	10.1676	2.30404	0.779861	0.403004	0.691468	0.28688	0.24425	0.3153	0.07105	0.768684	2.51e-09	NA	NA	0.206074	FALSE	NA	NA	NA
ENST00000505980.5	ENSG00000145687.16	SSBP2	protein_coding	protein_coding	31.7847	31.0828	32.2527	1.51086	0.101083	0.0532866	0.835839	6.20445	5.37503	6.75741	0.950362	0.954906	0.32965	0.622214	0.19556	0.17485	0.209367	0.0345167	0.927592	2.51e-09	FALSE	yes	1	TRUE	no	NA	NA
ENST00000507472.5	ENSG00000145687.16	SSBP2	protein_coding	processed_transcript	31.7847	31.0828	32.2527	1.51086	0.101083	0.0532866	0.835839	1.24315	1.68625	0.947746	0.829867	0.480611	-0.824637	NA	0.03986	0.0557	0.0293	-0.0264	0.958085	2.51e-09	NA	NA	0.180363	FALSE	NA	NA	NA
ENST00000510060.5	ENSG00000145687.16	SSBP2	protein_coding	processed_transcript	31.7847	31.0828	32.2527	1.51086	0.101083	0.0532866	0.835839	1.67334	2.25307	1.28686	1.05014	0.648756	-0.803256	NA	0.05238	0.071	0.0399667	-0.0310333	0.959638	2.51e-09	NA	NA	0.736986	TRUE	NA	NA	NA
ENST00000512923.5	ENSG00000145687.16	SSBP2	protein_coding	protein_coding	31.7847	31.0828	32.2527	1.51086	0.101083	0.0532866	0.835839	1.71821	1.67975	1.74386	0.196143	0.685337	0.05372	NA	0.05408	0.0539	0.0542	0.0003	0.970242	2.51e-09	FALSE	yes	0.999771	TRUE	no	NA	NA
ENST00000450383.1	ENSG00000185347.17	C14orf80	protein_coding	protein_coding	41.5001	42.5887	40.7743	1.7293	1.13927	-0.0627957	0.833369	0.471677	1.17919	0	0.176753	0	-6.89384	NA	0.01102	0.02755	0	-0.02755	2.87e-09	2.87e-09	FALSE	yes	0.999843	TRUE	no	NA	NA
ENST00000427614.5	ENSG00000185347.17	C14orf80	protein_coding	protein_coding	41.5001	42.5887	40.7743	1.7293	1.13927	-0.0627957	0.833369	0.913677	0.476779	1.20494	0.196096	0.243141	1.31955	NA	0.02236	0.01105	0.0299	0.01885	0.357136	2.87e-09	FALSE	yes	0.112571	FALSE	no	NA	NA
ENST00000451719.5	ENSG00000185347.17	C14orf80	protein_coding	protein_coding	41.5001	42.5887	40.7743	1.7293	1.13927	-0.0627957	0.833369	1.08988	1.44876	0.850619	0.376155	0.254348	-0.761299	NA	0.02586	0.03375	0.0206	-0.01315	0.793703	2.87e-09	FALSE	yes	0.0268986	FALSE	no	NA	NA
ENST00000546536.5	ENSG00000185347.17	C14orf80	protein_coding	retained_intron	41.5001	42.5887	40.7743	1.7293	1.13927	-0.0627957	0.833369	0.841263	0.658816	0.962894	0.393744	0.0743977	0.540672	NA	0.02062	0.0159	0.0237667	0.00786667	0.899224	2.87e-09	NA	NA	0.999872	TRUE	NA	NA	NA
ENST00000392523.8	ENSG00000185347.17	C14orf80	protein_coding	protein_coding	41.5001	42.5887	40.7743	1.7293	1.13927	-0.0627957	0.833369	3.38912	2.89919	3.71575	0.248469	0.623635	0.356913	0.643376	0.08262	0.0684	0.0921	0.0237	0.900863	2.87e-09	FALSE	yes	1	TRUE	no	NA	NA
ENST00000392522.7	ENSG00000185347.17	C14orf80	protein_coding	protein_coding	41.5001	42.5887	40.7743	1.7293	1.13927	-0.0627957	0.833369	12.5168	13.7516	11.6935	2.79498	0.589747	-0.233706	0.648749	0.30018	0.3208	0.286433	-0.0343667	0.935667	2.87e-09	FALSE	yes	1	TRUE	no	NA	NA
ENST00000463869.5	ENSG00000185347.17	C14orf80	protein_coding	retained_intron	41.5001	42.5887	40.7743	1.7293	1.13927	-0.0627957	0.833369	0.411335	0.276183	0.501437	0.215012	0.18021	0.83762	NA	0.01016	0.0067	0.0124667	0.00576667	0.935958	2.87e-09	NA	NA	0.0653877	FALSE	NA	NA	NA
ENST00000432805.5	ENSG00000185347.17	C14orf80	protein_coding	protein_coding	41.5001	42.5887	40.7743	1.7293	1.13927	-0.0627957	0.833369	5.99355	5.87129	6.07505	2.03795	0.456191	0.0491354	0.956556	0.14524	0.14005	0.1487	0.00865	0.959638	2.87e-09	FALSE	yes	0.532362	TRUE	no	NA	NA
ENST00000546492.1	ENSG00000185347.17	C14orf80	protein_coding	retained_intron	41.5001	42.5887	40.7743	1.7293	1.13927	-0.0627957	0.833369	10.9529	10.9489	10.9556	0.102539	0.946851	0.00087627	0.989227	0.2638	0.25745	0.268033	0.0105833	0.959698	2.87e-09	NA	NA	0.0201288	FALSE	NA	NA	NA
ENST00000421892.5	ENSG00000185347.17	C14orf80	protein_coding	protein_coding	41.5001	42.5887	40.7743	1.7293	1.13927	-0.0627957	0.833369	0.530734	0.504656	0.548118	0.504656	0.303259	0.116962	NA	0.01238	0.0114	0.0130333	0.00163333	0.95972	2.87e-09	FALSE	yes	0.112286	FALSE	no	NA	NA
ENST00000460959.5	ENSG00000185347.17	C14orf80	protein_coding	retained_intron	41.5001	42.5887	40.7743	1.7293	1.13927	-0.0627957	0.833369	0.869394	0.867583	0.870601	0.386412	0.475012	0.00495415	NA	0.02056	0.02005	0.0209	0.00085	0.961765	2.87e-09	NA	NA	0.141484	FALSE	NA	NA	NA
ENST00000551538.5	ENSG00000185347.17	C14orf80	protein_coding	retained_intron	41.5001	42.5887	40.7743	1.7293	1.13927	-0.0627957	0.833369	0.965614	1.02541	0.925748	0.0772701	0.0822967	-0.146014	0.889839	0.02328	0.0242	0.0226667	-0.00153333	0.965291	2.87e-09	NA	NA	0.651492	TRUE	NA	NA	NA
ENST00000329886.11	ENSG00000185347.17	C14orf80	protein_coding	protein_coding	41.5001	42.5887	40.7743	1.7293	1.13927	-0.0627957	0.833369	2.14551	2.09058	2.18213	0.235077	0.638645	0.0615482	0.975223	0.05238	0.0494	0.0543667	0.00496667	0.992614	2.87e-09	FALSE	yes	0.999997	TRUE	no	NA	NA
ENST00000504677.5	ENSG00000168255.19	POLR2J3	protein_coding	processed_transcript	64.9946	65.6592	64.5516	7.63906	4.59157	-0.0245424	0.975066	0.64441	0	1.07402	0	0.118125	6.76024	NA	0.01016	0	0.0169333	0.0169333	2.94e-09	2.94e-09	NA	NA	0.148735	FALSE	NA	NA	NA
ENST00000506060.5	ENSG00000168255.19	POLR2J3	protein_coding	processed_transcript	64.9946	65.6592	64.5516	7.63906	4.59157	-0.0245424	0.975066	1.91734	3.02042	1.18195	0.257554	0.511262	-1.34619	NA	0.0302	0.04615	0.0195667	-0.0265833	0.659168	2.94e-09	NA	NA	0.00782405	FALSE	NA	NA	NA
ENST00000508910.5	ENSG00000168255.19	POLR2J3	protein_coding	processed_transcript	64.9946	65.6592	64.5516	7.63906	4.59157	-0.0245424	0.975066	1.79465	1.03752	2.29941	1.03752	0.572487	1.14054	NA	0.0268	0.01415	0.0352333	0.0210833	0.779254	2.94e-09	NA	NA	0.00548876	FALSE	NA	NA	NA
ENST00000443430.2	ENSG00000168255.19	POLR2J3	protein_coding	processed_transcript	64.9946	65.6592	64.5516	7.63906	4.59157	-0.0245424	0.975066	1.14127	1.73292	0.74684	0.0915154	0.390838	-1.20345	NA	0.01774	0.0266	0.0118333	-0.0147667	0.903565	2.94e-09	NA	NA	0.163085	FALSE	NA	NA	NA
ENST00000502415.5	ENSG00000168255.19	POLR2J3	protein_coding	processed_transcript	64.9946	65.6592	64.5516	7.63906	4.59157	-0.0245424	0.975066	1.20818	1.35268	1.11185	0.370289	0.297489	-0.280563	NA	0.01868	0.02155	0.0167667	-0.00478333	0.959638	2.94e-09	NA	NA	0.169987	FALSE	NA	NA	NA
ENST00000504101.1	ENSG00000168255.19	POLR2J3	protein_coding	retained_intron	64.9946	65.6592	64.5516	7.63906	4.59157	-0.0245424	0.975066	1.96405	2.13121	1.8526	0.38697	0.27824	-0.201111	NA	0.0305	0.0336	0.0284333	-0.00516667	0.959638	2.94e-09	NA	NA	0.381953	NA	NA	NA	NA
ENST00000511313.5	ENSG00000168255.19	POLR2J3	protein_coding	protein_coding	64.9946	65.6592	64.5516	7.63906	4.59157	-0.0245424	0.975066	2.02614	2.12108	1.96284	0.214601	0.173529	-0.111312	0.883539	0.03122	0.0324	0.0304333	-0.00196667	0.959638	2.94e-09	FALSE	no	0.110828	FALSE	no	NA	NA
ENST00000513438.1	ENSG00000168255.19	POLR2J3	protein_coding	protein_coding	64.9946	65.6592	64.5516	7.63906	4.59157	-0.0245424	0.975066	1.84131	1.6404	1.97526	0.274259	0.465411	0.266512	NA	0.02872	0.0248	0.0313333	0.00653333	0.959638	2.94e-09	FALSE	no	0.199281	FALSE	no	NA	NA
ENST00000513506.5	ENSG00000168255.19	POLR2J3	protein_coding	protein_coding	64.9946	65.6592	64.5516	7.63906	4.59157	-0.0245424	0.975066	1.45108	1.67267	1.30336	0.642965	0.0583576	-0.357488	NA	0.02214	0.02465	0.0204667	-0.00418333	0.959638	2.94e-09	FALSE	no	0.391522	NA	no	NA	NA
ENST00000489144.5	ENSG00000168255.19	POLR2J3	protein_coding	nonsense_mediated_decay	64.9946	65.6592	64.5516	7.63906	4.59157	-0.0245424	0.975066	1.22832	1.29277	1.18536	0.140722	0.0900232	-0.124128	0.915963	0.01914	0.01975	0.0187333	-0.00101667	0.960773	2.94e-09	TRUE	yes	0.945223	TRUE	no	NA	NA
ENST00000621093.4	ENSG00000168255.19	POLR2J3	protein_coding	protein_coding	64.9946	65.6592	64.5516	7.63906	4.59157	-0.0245424	0.975066	35.3486	34.7942	35.7182	4.91241	6.05039	0.0378042	0.966642	0.5388	0.52835	0.545767	0.0174167	0.964217	2.94e-09	FALSE	yes	0.766632	TRUE	no	NA	NA
ENST00000608621.5	ENSG00000168255.19	POLR2J3	protein_coding	nonsense_mediated_decay	64.9946	65.6592	64.5516	7.63906	4.59157	-0.0245424	0.975066	6.81909	7.15414	6.59573	1.55705	1.83616	-0.117077	0.952604	0.10732	0.10765	0.1071	-0.00055	0.965978	2.94e-09	TRUE	yes	0.778812	TRUE	no	NA	NA
ENST00000486319.5	ENSG00000168255.19	POLR2J3	protein_coding	nonsense_mediated_decay	64.9946	65.6592	64.5516	7.63906	4.59157	-0.0245424	0.975066	6.3633	6.40279	6.33697	0.448303	0.376552	-0.0148827	0.990294	0.09918	0.09965	0.0988667	-0.000783333	0.996418	2.94e-09	TRUE	no	0.999911	TRUE	no	NA	NA
ENST00000307767.12	ENSG00000171928.13	TVP23B	protein_coding	protein_coding	48.9071	48.589	49.1191	1.19209	1.21796	0.0156515	0.922057	27.3444	29.9909	25.58	0.894191	0.554814	-0.229429	0.0370454	0.55938	0.61715	0.520867	-0.0962833	2.35e-06	2.98e-09	FALSE	yes	0.927749	TRUE	no	0	NA
ENST00000581733.1	ENSG00000171928.13	TVP23B	protein_coding	protein_coding	48.9071	48.589	49.1191	1.19209	1.21796	0.0156515	0.922057	17.6295	13.5879	20.3239	0.165253	1.00567	0.5805	0.000535351	0.35992	0.2799	0.413267	0.133367	2.98e-09	2.98e-09	FALSE	yes	0.249924	FALSE	no	0	NA
ENST00000575261.5	ENSG00000171928.13	TVP23B	protein_coding	protein_coding	48.9071	48.589	49.1191	1.19209	1.21796	0.0156515	0.922057	0.777126	1.66595	0.184578	0.840148	0.184578	-3.10656	NA	0.0159	0.03385	0.00393333	-0.0299167	0.475214	2.98e-09	FALSE	yes	0.160217	FALSE	no	0	NA
ENST00000571018.5	ENSG00000171928.13	TVP23B	protein_coding	nonsense_mediated_decay	48.9071	48.589	49.1191	1.19209	1.21796	0.0156515	0.922057	0.661091	0.982522	0.446804	0.230693	0.226508	-1.11952	NA	0.01362	0.02035	0.00913333	-0.0112167	0.910579	2.98e-09	TRUE	no	0.223048	FALSE	no	0	NA
ENST00000476139.5	ENSG00000171928.13	TVP23B	protein_coding	protein_coding	48.9071	48.589	49.1191	1.19209	1.21796	0.0156515	0.922057	0.82407	1.00272	0.704971	0.370623	0.035963	-0.502275	NA	0.01682	0.02045	0.0144	-0.00605	0.936733	2.98e-09	FALSE	yes	0.356924	NA	no	0	NA
ENST00000416373.6	ENSG00000119318.12	RAD23B	protein_coding	protein_coding	144.015	139.304	147.155	3.81445	0.970782	0.079094	0.344199	14.1844	22.8331	8.41866	0.228137	1.08271	-1.43838	9.65e-13	0.09994	0.16395	0.0572667	-0.106683	3.56e-08	3.09e-09	FALSE	yes	1	TRUE	no	0	TRUE
ENST00000358015.7	ENSG00000119318.12	RAD23B	protein_coding	protein_coding	144.015	139.304	147.155	3.81445	0.970782	0.079094	0.344199	129.83	116.471	138.736	3.58631	1.87073	0.252356	1.99e-05	0.90006	0.83605	0.942733	0.106683	3.09e-09	3.09e-09	FALSE	yes	1	TRUE	no	0	TRUE
ENST00000545722.1	ENSG00000176834.13	VSIG10	protein_coding	processed_transcript	23.491	22.7505	23.9847	0.576226	0.778268	0.0761812	0.679208	0.858823	2.14706	0	0.729942	0	-7.75292	NA	0.03744	0.0936	0	-0.0936	3.21e-09	3.21e-09	NA	NA	0.0179091	FALSE	NA	NA	NA
ENST00000358788.10	ENSG00000115364.13	MRPL19	protein_coding	protein_coding	52.0519	53.0634	51.3776	1.93904	0.327175	-0.04657	0.845967	0.555404	0	0.925673	0	0.136747	6.54793	NA	0.0108	0	0.018	0.018	3.21e-09	3.21e-09	FALSE	yes	0.903462	TRUE	no	NA	NA
ENST00000545259.1	ENSG00000176834.13	VSIG10	protein_coding	retained_intron	23.491	22.7505	23.9847	0.576226	0.778268	0.0761812	0.679208	1.03186	0.481706	1.39863	0.180974	0.115976	1.51843	NA	0.0435	0.0214	0.0582333	0.0368333	0.0413204	3.21e-09	NA	NA	0.0368611	FALSE	NA	NA	NA
ENST00000393909.6	ENSG00000115364.13	MRPL19	protein_coding	protein_coding	52.0519	53.0634	51.3776	1.93904	0.327175	-0.04657	0.845967	19.1935	21.0117	17.9814	0.612067	0.43095	-0.224575	0.0471044	0.3685	0.39605	0.350133	-0.0459167	0.402145	3.21e-09	FALSE	yes	0.999892	TRUE	no	NA	NA
ENST00000536905.5	ENSG00000176834.13	VSIG10	protein_coding	processed_transcript	23.491	22.7505	23.9847	0.576226	0.778268	0.0761812	0.679208	2.25879	1.61146	2.69034	0.488727	0.208177	0.735849	NA	0.09566	0.0714	0.111833	0.0404333	0.570968	3.21e-09	NA	NA	0.00601529	FALSE	NA	NA	NA
ENST00000621133.1	ENSG00000176834.13	VSIG10	protein_coding	processed_transcript	23.491	22.7505	23.9847	0.576226	0.778268	0.0761812	0.679208	1.68243	1.34357	1.90834	0.109966	0.287622	0.503091	NA	0.071	0.05895	0.0790333	0.0200833	0.736791	3.21e-09	NA	NA	0.0197918	FALSE	NA	NA	NA
ENST00000540117.1	ENSG00000176834.13	VSIG10	protein_coding	retained_intron	23.491	22.7505	23.9847	0.576226	0.778268	0.0761812	0.679208	0.47155	0.603193	0.383788	0.202218	0.383788	-0.638924	NA	0.02024	0.02675	0.0159	-0.01085	0.744586	3.21e-09	NA	NA	0.0731357	FALSE	NA	NA	NA
ENST00000409374.5	ENSG00000115364.13	MRPL19	protein_coding	protein_coding	52.0519	53.0634	51.3776	1.93904	0.327175	-0.04657	0.845967	29.1341	28.3216	29.6757	3.73175	1.60939	0.0673578	0.903867	0.55918	0.5319	0.577367	0.0454667	0.864875	3.21e-09	FALSE	yes	0.999971	TRUE	no	NA	NA
ENST00000476622.1	ENSG00000115364.13	MRPL19	protein_coding	protein_coding	52.0519	53.0634	51.3776	1.93904	0.327175	-0.04657	0.845967	2.4272	3.49261	1.71693	2.40173	0.865688	-1.02022	NA	0.04718	0.06755	0.0336	-0.03395	0.959638	3.21e-09	FALSE	yes	0.176905	FALSE	no	NA	NA
ENST00000359236.9	ENSG00000176834.13	VSIG10	protein_coding	protein_coding	23.491	22.7505	23.9847	0.576226	0.778268	0.0761812	0.679208	11.6987	11.088	12.1059	0.189448	0.225852	0.126601	0.298929	0.49832	0.4875	0.505533	0.0180333	0.959638	3.21e-09	FALSE	yes	1	TRUE	yes	NA	NA
ENST00000538357.1	ENSG00000176834.13	VSIG10	protein_coding	protein_coding	23.491	22.7505	23.9847	0.576226	0.778268	0.0761812	0.679208	0.519154	0.454767	0.562079	0.0163789	0.0858239	0.299706	NA	0.02202	0.02	0.0233667	0.00336667	0.959638	3.21e-09	FALSE	yes	0.159397	FALSE	yes	NA	NA
ENST00000539956.1	ENSG00000176834.13	VSIG10	protein_coding	processed_transcript	23.491	22.7505	23.9847	0.576226	0.778268	0.0761812	0.679208	1.23418	1.30544	1.18668	0.162656	0.207655	-0.136505	NA	0.0527	0.0576	0.0494333	-0.00816667	0.959638	3.21e-09	NA	NA	0.0711983	FALSE	NA	NA	NA
ENST00000612851.1	ENSG00000176834.13	VSIG10	protein_coding	retained_intron	23.491	22.7505	23.9847	0.576226	0.778268	0.0761812	0.679208	3.0083	2.94473	3.05069	0.24303	0.118129	0.0508337	0.951214	0.12812	0.12925	0.127367	-0.00188333	0.985869	3.21e-09	NA	NA	0.124865	FALSE	NA	NA	NA
ENST00000321694.5	ENSG00000176834.13	VSIG10	protein_coding	processed_transcript	23.491	22.7505	23.9847	0.576226	0.778268	0.0761812	0.679208	0.479545	0.467841	0.487348	0.263939	0.188736	0.0577259	NA	0.02012	0.0203	0.02	-0.0003	0.998975	3.21e-09	NA	NA	0.0590934	FALSE	NA	NA	NA
ENST00000395155.3	ENSG00000106089.11	STX1A	protein_coding	protein_coding	9.99877	10.2099	9.85801	0.576478	0.517119	-0.0505523	0.940846	0.587516	1.46879	0	0.24538	0	-7.20827	NA	0.05826	0.14565	0	-0.14565	3.57e-09	3.57e-09	FALSE	yes	0.999991	TRUE	no	0	TRUE
ENST00000480126.5	ENSG00000106089.11	STX1A	protein_coding	processed_transcript	9.99877	10.2099	9.85801	0.576478	0.517119	-0.0505523	0.940846	2.03092	1.42624	2.43403	0.103021	0.243813	0.766967	NA	0.20372	0.1396	0.246467	0.106867	0.0273868	3.57e-09	NA	NA	0.956029	TRUE	NA	1	TRUE
ENST00000462135.1	ENSG00000106089.11	STX1A	protein_coding	retained_intron	9.99877	10.2099	9.85801	0.576478	0.517119	-0.0505523	0.940846	1.05452	1.55792	0.71891	0.13446	0.102452	-1.10504	NA	0.1056	0.15235	0.0744333	-0.0779167	0.0903881	3.57e-09	NA	NA	0.942582	TRUE	NA	1	TRUE
ENST00000491427.5	ENSG00000106089.11	STX1A	protein_coding	retained_intron	9.99877	10.2099	9.85801	0.576478	0.517119	-0.0505523	0.940846	0.142515	0	0.237526	0	0.104632	4.62951	NA	0.01386	0	0.0231	0.0231	0.186658	3.57e-09	NA	NA	0.954383	TRUE	NA	2	TRUE
ENST00000491645.1	ENSG00000106089.11	STX1A	protein_coding	processed_transcript	9.99877	10.2099	9.85801	0.576478	0.517119	-0.0505523	0.940846	0.41267	0.237963	0.529142	0.0474994	0.22502	1.12054	NA	0.04118	0.02315	0.0532	0.03005	0.89945	3.57e-09	NA	NA	0.111459	FALSE	NA	1	TRUE
ENST00000395156.7	ENSG00000106089.11	STX1A	protein_coding	protein_coding	9.99877	10.2099	9.85801	0.576478	0.517119	-0.0505523	0.940846	1.76304	1.43349	1.98275	1.43349	0.388759	0.465199	0.952604	0.18328	0.1488	0.206267	0.0574667	0.921523	3.57e-09	FALSE	yes	0.999972	TRUE	no	0	TRUE
ENST00000461441.5	ENSG00000106089.11	STX1A	protein_coding	retained_intron	9.99877	10.2099	9.85801	0.576478	0.517119	-0.0505523	0.940846	0.635621	0.840388	0.49911	0.15873	0.25228	-0.740144	NA	0.06158	0.0817	0.0481667	-0.0335333	0.940889	3.57e-09	NA	NA	0.151744	FALSE	NA	0	TRUE
ENST00000484736.5	ENSG00000106089.11	STX1A	protein_coding	processed_transcript	9.99877	10.2099	9.85801	0.576478	0.517119	-0.0505523	0.940846	1.12348	1.01592	1.19518	0.594899	0.487598	0.232324	NA	0.11428	0.0965	0.126133	0.0296333	0.960136	3.57e-09	NA	NA	0.0414059	FALSE	NA	1	TRUE
ENST00000494245.1	ENSG00000106089.11	STX1A	protein_coding	retained_intron	9.99877	10.2099	9.85801	0.576478	0.517119	-0.0505523	0.940846	0.157598	0.100244	0.195835	0.100244	0.195835	0.900788	NA	0.01518	0.0104	0.0183667	0.00796667	0.97465	3.57e-09	NA	NA	0.087276	FALSE	NA	0	TRUE
ENST00000222812.7	ENSG00000106089.11	STX1A	protein_coding	protein_coding	9.99877	10.2099	9.85801	0.576478	0.517119	-0.0505523	0.940846	1.83548	2.0372	1.701	1.22522	0.587488	-0.258811	0.922456	0.17782	0.1934	0.167433	-0.0259667	0.982086	3.57e-09	FALSE	yes	0.999999	TRUE	no	1	TRUE
ENST00000285420.8	ENSG00000155100.10	OTUD6B	protein_coding	protein_coding	38.5034	41.4401	36.5456	1.40408	0.579969	-0.181283	0.194325	12.0178	24.7556	3.526	1.9594	0.98859	-2.80815	1.13e-06	0.297	0.59645	0.0973667	-0.499083	4.6e-09	4.6e-09	FALSE	yes	0.999996	TRUE	no	0	FALSE
ENST00000617869.4	ENSG00000155100.10	OTUD6B	protein_coding	protein_coding	38.5034	41.4401	36.5456	1.40408	0.579969	-0.181283	0.194325	10.673	0.687229	17.3301	0.576961	0.429309	4.63634	0.000551136	0.29134	0.0171	0.474167	0.457067	1.6e-06	4.6e-09	FALSE	yes	0.999996	TRUE	no	0	FALSE
ENST00000522894.5	ENSG00000155100.10	OTUD6B	protein_coding	nonsense_mediated_decay	38.5034	41.4401	36.5456	1.40408	0.579969	-0.181283	0.194325	2.53902	3.25659	2.06064	0.422359	0.152935	-0.65771	0.210418	0.06526	0.07835	0.0565333	-0.0218167	0.508331	4.6e-09	TRUE	no	0.999139	TRUE	no	0	FALSE
ENST00000404789.7	ENSG00000155100.10	OTUD6B	protein_coding	protein_coding	38.5034	41.4401	36.5456	1.40408	0.579969	-0.181283	0.194325	12.9513	12.3573	13.3473	0.488462	1.45981	0.111099	0.868877	0.33808	0.29895	0.364167	0.0652167	0.759858	4.6e-09	FALSE	yes	0.999998	TRUE	no	0	FALSE
ENST00000360807.8	ENSG00000125844.15	RRBP1	protein_coding	protein_coding	71.7235	66.4086	75.2668	3.2951	1.90735	0.180617	0.0565285	0.720145	1.80036	0	0.485198	0	-7.50013	8.36e-11	0.01102	0.02755	0	-0.02755	5.05e-09	5.05e-09	FALSE	yes	1	TRUE	no	NA	NA
ENST00000377807.6	ENSG00000125844.15	RRBP1	protein_coding	protein_coding	71.7235	66.4086	75.2668	3.2951	1.90735	0.180617	0.0565285	1.55476	0.173146	2.47583	0.153097	0.277929	3.76267	1.52e-06	0.02086	0.0025	0.0331	0.0306	0.00378667	5.05e-09	FALSE	yes	1	TRUE	no	NA	NA
ENST00000246043.8	ENSG00000125844.15	RRBP1	protein_coding	protein_coding	71.7235	66.4086	75.2668	3.2951	1.90735	0.180617	0.0565285	30.8383	32.5471	29.6991	2.85903	3.18951	-0.132068	0.776828	0.43526	0.49345	0.396467	-0.0969833	0.79707	5.05e-09	FALSE	yes	1	TRUE	no	NA	NA
ENST00000610403.4	ENSG00000125844.15	RRBP1	protein_coding	protein_coding	71.7235	66.4086	75.2668	3.2951	1.90735	0.180617	0.0565285	6.41049	3.24713	8.5194	3.24713	2.1994	1.38884	0.853838	0.08596	0.0466	0.1122	0.0656	0.797532	5.05e-09	FALSE	no	1	TRUE	no	NA	NA
ENST00000377813.5	ENSG00000125844.15	RRBP1	protein_coding	protein_coding	71.7235	66.4086	75.2668	3.2951	1.90735	0.180617	0.0565285	8.83849	7.68977	9.6043	0.221606	1.30816	0.320366	0.400103	0.12268	0.1159	0.1272	0.0113	0.959638	5.05e-09	FALSE	yes	1	TRUE	no	NA	NA
ENST00000398782.2	ENSG00000125844.15	RRBP1	protein_coding	protein_coding	71.7235	66.4086	75.2668	3.2951	1.90735	0.180617	0.0565285	22.0086	19.5771	23.6297	3.10699	1.75467	0.271309	0.516723	0.30522	0.2932	0.313233	0.0200333	0.959638	5.05e-09	FALSE	yes	0.5637	TRUE	no	NA	NA
ENST00000468428.1	ENSG00000125844.15	RRBP1	protein_coding	retained_intron	71.7235	66.4086	75.2668	3.2951	1.90735	0.180617	0.0565285	0.834184	0.798925	0.85769	0.0370715	0.0590926	0.101175	NA	0.01164	0.01205	0.0113667	-0.000683333	0.961415	5.05e-09	NA	NA	0.983695	TRUE	NA	NA	NA
ENST00000485096.5	ENSG00000158092.6	NCK1	protein_coding	protein_coding	33.6146	37.5367	31	2.16993	1.58546	-0.275953	0.122751	0.419317	0	0.698862	0	0.0617361	6.14743	NA	0.01362	0	0.0227	0.0227	5.23e-09	5.23e-09	FALSE	yes	0.124318	FALSE	no	0	NA
ENST00000481752.5	ENSG00000158092.6	NCK1	protein_coding	protein_coding	33.6146	37.5367	31	2.16993	1.58546	-0.275953	0.122751	6.03069	4.43736	7.09292	1.25649	0.609189	0.675464	0.147454	0.18354	0.11665	0.228133	0.111483	0.0201763	5.23e-09	FALSE	yes	1	TRUE	no	1	NA
ENST00000288986.6	ENSG00000158092.6	NCK1	protein_coding	protein_coding	33.6146	37.5367	31	2.16993	1.58546	-0.275953	0.122751	15.891	19.4886	13.4927	0.189294	0.600366	-0.530125	6.01e-05	0.4709	0.52065	0.437733	-0.0829167	0.65678	5.23e-09	FALSE	yes	1	TRUE	no	1	NA
ENST00000496489.5	ENSG00000158092.6	NCK1	protein_coding	protein_coding	33.6146	37.5367	31	2.16993	1.58546	-0.275953	0.122751	3.71199	5.50427	2.51714	2.40497	0.554193	-1.12567	NA	0.1057	0.1434	0.0805667	-0.0628333	0.780541	5.23e-09	NA	no	0.13083	FALSE	no	0	NA
ENST00000467911.1	ENSG00000158092.6	NCK1	protein_coding	protein_coding	33.6146	37.5367	31	2.16993	1.58546	-0.275953	0.122751	3.12203	3.83854	2.64436	0.341629	0.439739	-0.53595	NA	0.09174	0.1021	0.0848333	-0.0172667	0.935667	5.23e-09	FALSE	yes	0.141108	FALSE	no	0	NA
ENST00000491539.5	ENSG00000158092.6	NCK1	protein_coding	protein_coding	33.6146	37.5367	31	2.16993	1.58546	-0.275953	0.122751	1.59922	1.51412	1.65595	0.932702	0.548219	0.128375	NA	0.04824	0.0419	0.0524667	0.0105667	0.959638	5.23e-09	FALSE	yes	0.0976914	FALSE	no	0	NA
ENST00000460960.1	ENSG00000158092.6	NCK1	protein_coding	retained_intron	33.6146	37.5367	31	2.16993	1.58546	-0.275953	0.122751	0.435017	0.574144	0.342266	0.353608	0.0964598	-0.729661	NA	0.01298	0.0159	0.0110333	-0.00486667	0.971339	5.23e-09	NA	NA	0.162389	FALSE	NA	0	NA
ENST00000469404.1	ENSG00000158092.6	NCK1	protein_coding	protein_coding	33.6146	37.5367	31	2.16993	1.58546	-0.275953	0.122751	1.69523	1.91458	1.54899	0.471068	0.209661	-0.303931	0.769568	0.0513	0.05195	0.0508667	-0.00108333	0.99727	5.23e-09	FALSE	yes	0.999994	TRUE	no	1	NA
ENST00000358461.6	ENSG00000196526.10	AFAP1	protein_coding	protein_coding	4.00651	4.03575	3.98702	0.266577	0.124935	-0.0174825	0.984258	3.25199	3.93889	2.79405	0.169724	0.192921	-0.493936	0.00843891	0.81074	0.9775	0.699567	-0.277933	5.5e-09	5.5e-09	FALSE	yes	1	TRUE	no	0	FALSE
ENST00000360265.8	ENSG00000196526.10	AFAP1	protein_coding	protein_coding	4.00651	4.03575	3.98702	0.266577	0.124935	-0.0174825	0.984258	0.377856	0.0152926	0.619565	0.0152926	0.150282	4.63757	9.52e-08	0.09628	0.00355	0.1581	0.15455	0.00146333	5.5e-09	FALSE	yes	1	TRUE	no	0	FALSE
ENST00000382543.3	ENSG00000196526.10	AFAP1	protein_coding	protein_coding	4.00651	4.03575	3.98702	0.266577	0.124935	-0.0174825	0.984258	0.277863	0.0815606	0.408732	0.0815606	0.114237	2.19323	NA	0.069	0.01895	0.102367	0.0834167	0.316299	5.5e-09	FALSE	yes	1	TRUE	no	0	FALSE
ENST00000614385.1	ENSG00000196526.10	AFAP1	protein_coding	protein_coding	4.00651	4.03575	3.98702	0.266577	0.124935	-0.0174825	0.984258	0.0665838	0	0.110973	0	0.110973	3.59661	NA	0.01604	0	0.0267333	0.0267333	0.959638	5.5e-09	FALSE	no	0.0610634	FALSE	no	0	FALSE
ENST00000587679.1	ENSG00000173786.16	CNP	protein_coding	protein_coding	27.4847	25.254	28.9719	0.79446	0.297176	0.19807	0.120009	0.518685	0	0.864475	0	0.0746301	6.45035	NA	0.01788	0	0.0298	0.0298	5.69e-09	5.69e-09	FALSE	yes	0.124364	FALSE	no	NA	NA
ENST00000393888.1	ENSG00000173786.16	CNP	protein_coding	protein_coding	27.4847	25.254	28.9719	0.79446	0.297176	0.19807	0.120009	23.8221	22.5292	24.684	0.154809	0.327967	0.131721	0.251636	0.86832	0.8928	0.852	-0.0408	0.193671	5.69e-09	FALSE	yes	1	TRUE	no	NA	NA
ENST00000486438.1	ENSG00000173786.16	CNP	protein_coding	retained_intron	27.4847	25.254	28.9719	0.79446	0.297176	0.19807	0.120009	0.444564	0.278914	0.554997	0.108499	0.277282	0.967605	NA	0.01578	0.01095	0.019	0.00805	0.959638	5.69e-09	NA	NA	0.998912	TRUE	NA	NA	NA
ENST00000393892.7	ENSG00000173786.16	CNP	protein_coding	protein_coding	27.4847	25.254	28.9719	0.79446	0.297176	0.19807	0.120009	1.99593	1.79546	2.12958	0.131411	0.0986264	0.244961	0.523216	0.0725	0.071	0.0735	0.0025	0.981236	5.69e-09	FALSE	yes	0.999999	TRUE	no	NA	NA
ENST00000562473.1	ENSG00000103485.17	QPRT	protein_coding	protein_coding	67.963	44.6366	83.5139	1.83252	1.97943	0.903638	4.72e-31	3.21767	0.894839	4.76622	0.0227177	0.0755936	2.40014	NA	0.0423	0.02005	0.0571333	0.0370833	6.79e-09	6.79e-09	FALSE	yes	0.98818	TRUE	no	NA	NA
ENST00000395384.8	ENSG00000103485.17	QPRT	protein_coding	protein_coding	67.963	44.6366	83.5139	1.83252	1.97943	0.903638	4.72e-31	59.18	40.1224	71.8851	0.566163	2.1725	0.841126	4.26e-32	0.87624	0.89985	0.8605	-0.03935	0.506498	6.79e-09	FALSE	yes	0.999999	TRUE	no	NA	NA
ENST00000219771.7	ENSG00000103485.17	QPRT	protein_coding	processed_transcript	67.963	44.6366	83.5139	1.83252	1.97943	0.903638	4.72e-31	2.44218	1.55475	3.03381	1.55475	0.7964	0.959944	NA	0.0353	0.03345	0.0365333	0.00308333	0.939516	6.79e-09	NA	NA	0.98323	TRUE	NA	NA	NA
ENST00000564967.1	ENSG00000103485.17	QPRT	protein_coding	retained_intron	67.963	44.6366	83.5139	1.83252	1.97943	0.903638	4.72e-31	3.12314	2.06467	3.8288	0.311113	0.486201	0.887775	0.0351228	0.04614	0.0466	0.0458333	-0.000766667	0.994319	6.79e-09	NA	NA	0.397429	NA	NA	NA	NA
ENST00000355499.8	ENSG00000163374.19	YY1AP1	protein_coding	protein_coding	47.9796	45.4577	49.6609	0.89931	0.660251	0.12756	0.27953	4.57291	8.12368	2.20573	1.06868	0.288769	-1.87613	1.17e-11	0.0983	0.17925	0.0443333	-0.134917	6.97e-09	6.97e-09	FALSE	no	1	TRUE	no	0	FALSE
ENST00000404643.5	ENSG00000163374.19	YY1AP1	protein_coding	protein_coding	47.9796	45.4577	49.6609	0.89931	0.660251	0.12756	0.27953	11.7069	7.04433	14.8152	1.60109	0.443396	1.07147	1.47e-05	0.24076	0.15435	0.298367	0.144017	0.00129527	6.97e-09	FALSE	no	1	TRUE	no	0	FALSE
ENST00000405763.7	ENSG00000163374.19	YY1AP1	protein_coding	protein_coding	47.9796	45.4577	49.6609	0.89931	0.660251	0.12756	0.27953	2.00028	2.39795	1.73517	0.348736	0.0771566	-0.464437	0.445408	0.04212	0.0529	0.0349333	-0.0179667	0.379192	6.97e-09	FALSE	no	1	TRUE	no	1	FALSE
ENST00000368330.6	ENSG00000163374.19	YY1AP1	protein_coding	protein_coding	47.9796	45.4577	49.6609	0.89931	0.660251	0.12756	0.27953	3.60828	5.22717	2.52902	1.69968	0.573851	-1.04451	0.129839	0.07672	0.1158	0.0506667	-0.0651333	0.41389	6.97e-09	FALSE	no	1	TRUE	no	0	FALSE
ENST00000347088.9	ENSG00000163374.19	YY1AP1	protein_coding	protein_coding	47.9796	45.4577	49.6609	0.89931	0.660251	0.12756	0.27953	14.5679	9.91077	17.6727	4.65799	1.35082	0.833811	0.445512	0.30042	0.2161	0.356633	0.140533	0.601305	6.97e-09	FALSE	no	1	TRUE	no	0	FALSE
ENST00000476093.5	ENSG00000163374.19	YY1AP1	protein_coding	processed_transcript	47.9796	45.4577	49.6609	0.89931	0.660251	0.12756	0.27953	0.668197	0.468012	0.801655	0.24372	0.0816974	0.76382	NA	0.01382	0.0104	0.0161	0.0057	0.836742	6.97e-09	NA	NA	0.997612	TRUE	NA	0	FALSE
ENST00000368339.9	ENSG00000163374.19	YY1AP1	protein_coding	protein_coding	47.9796	45.4577	49.6609	0.89931	0.660251	0.12756	0.27953	1.86586	2.13887	1.68386	0.69536	0.720836	-0.343265	0.863815	0.03888	0.04675	0.0336333	-0.0131167	0.938946	6.97e-09	FALSE	no	1	TRUE	no	1	FALSE
ENST00000496324.5	ENSG00000163374.19	YY1AP1	protein_coding	retained_intron	47.9796	45.4577	49.6609	0.89931	0.660251	0.12756	0.27953	0.648219	0.858326	0.508148	0.487424	0.324432	-0.744873	NA	0.01352	0.01865	0.0101	-0.00855	0.94494	6.97e-09	NA	NA	0.99507	TRUE	NA	0	FALSE
ENST00000295566.8	ENSG00000163374.19	YY1AP1	protein_coding	protein_coding	47.9796	45.4577	49.6609	0.89931	0.660251	0.12756	0.27953	1.38079	2.62138	0.553733	2.62138	0.553733	-2.22273	0.866414	0.03014	0.05885	0.011	-0.04785	0.959638	6.97e-09	FALSE	no	1	TRUE	no	0	FALSE
ENST00000442834.6	ENSG00000163374.19	YY1AP1	protein_coding	retained_intron	47.9796	45.4577	49.6609	0.89931	0.660251	0.12756	0.27953	0.537875	0.544816	0.533247	0.126818	0.27272	-0.0304013	NA	0.01136	0.01205	0.0109	-0.00115	0.959638	6.97e-09	NA	NA	1	TRUE	NA	0	FALSE
ENST00000454523.5	ENSG00000163374.19	YY1AP1	protein_coding	protein_coding	47.9796	45.4577	49.6609	0.89931	0.660251	0.12756	0.27953	1.18588	0.946583	1.34541	0.164681	0.304989	0.502765	NA	0.02466	0.02075	0.0272667	0.00651667	0.959638	6.97e-09	FALSE	no	0.262993	NA	no	0	FALSE
ENST00000359205.9	ENSG00000163374.19	YY1AP1	protein_coding	protein_coding	47.9796	45.4577	49.6609	0.89931	0.660251	0.12756	0.27953	1.36587	1.21394	1.46715	0.101229	0.173902	0.27129	0.770375	0.02836	0.0267	0.0294667	0.00276667	0.960166	6.97e-09	FALSE	no	1	TRUE	no	0	FALSE
ENST00000311573.9	ENSG00000163374.19	YY1AP1	protein_coding	protein_coding	47.9796	45.4577	49.6609	0.89931	0.660251	0.12756	0.27953	0.771062	0.661121	0.844356	0.120782	0.423259	0.348265	NA	0.0161	0.0146	0.0171	0.0025	0.967183	6.97e-09	FALSE	no	1	TRUE	no	0	FALSE
ENST00000493625.5	ENSG00000163374.19	YY1AP1	protein_coding	processed_transcript	47.9796	45.4577	49.6609	0.89931	0.660251	0.12756	0.27953	1.04252	1.00127	1.07002	0.542488	0.28131	0.0948971	NA	0.02176	0.02225	0.0214333	-0.000816667	0.983307	6.97e-09	NA	NA	0.997667	TRUE	NA	0	FALSE
ENST00000589823.6	ENSG00000062716.12	VMP1	protein_coding	protein_coding	338.827	343.896	335.447	28.3994	7.52124	-0.0358856	0.884661	9.02805	2.68498	13.2568	1.07416	1.12862	2.29947	8.12e-06	0.0267	0.0076	0.0394333	0.0318333	7.22e-09	7.22e-09	FALSE	no	0.164595	FALSE	no	NA	NA
ENST00000588617.1	ENSG00000062716.12	VMP1	protein_coding	processed_transcript	338.827	343.896	335.447	28.3994	7.52124	-0.0358856	0.884661	12.3401	14.635	10.8102	3.32868	0.155443	-0.436687	0.381783	0.03614	0.04205	0.0322	-0.00985	0.453464	7.22e-09	NA	NA	0.0213813	FALSE	NA	NA	NA
ENST00000592106.5	ENSG00000062716.12	VMP1	protein_coding	protein_coding	338.827	343.896	335.447	28.3994	7.52124	-0.0358856	0.884661	9.70368	7.16354	11.3971	4.63516	1.08972	0.669176	NA	0.02836	0.01985	0.0340333	0.0141833	0.692179	7.22e-09	FALSE	no	0.0995545	FALSE	no	NA	NA
ENST00000585847.5	ENSG00000062716.12	VMP1	protein_coding	nonsense_mediated_decay	338.827	343.896	335.447	28.3994	7.52124	-0.0358856	0.884661	12.2617	14.9583	10.464	3.94765	2.12088	-0.515101	0.621939	0.03588	0.04285	0.0312333	-0.0116167	0.857123	7.22e-09	TRUE	no	0.183289	FALSE	no	NA	NA
ENST00000587470.1	ENSG00000062716.12	VMP1	protein_coding	retained_intron	338.827	343.896	335.447	28.3994	7.52124	-0.0358856	0.884661	86.3499	89.775	84.0664	7.55173	4.97541	-0.0947733	0.786005	0.25456	0.261	0.250267	-0.0107333	0.931365	7.22e-09	NA	NA	0.0223901	FALSE	NA	NA	NA
ENST00000592790.1	ENSG00000062716.12	VMP1	protein_coding	retained_intron	338.827	343.896	335.447	28.3994	7.52124	-0.0358856	0.884661	68.989	71.8397	67.0886	14.9715	4.29493	-0.0986987	0.910861	0.20254	0.2067	0.199767	-0.00693333	0.964783	7.22e-09	NA	NA	0.167115	FALSE	NA	NA	NA
ENST00000262291.8	ENSG00000062716.12	VMP1	protein_coding	protein_coding	338.827	343.896	335.447	28.3994	7.52124	-0.0358856	0.884661	125.673	128.542	123.76	6.05372	1.4149	-0.0546855	0.741878	0.37274	0.3778	0.369367	-0.00843333	0.97465	7.22e-09	FALSE	yes	1	TRUE	no	NA	NA
ENST00000591877.1	ENSG00000062716.12	VMP1	protein_coding	protein_coding	338.827	343.896	335.447	28.3994	7.52124	-0.0358856	0.884661	8.54316	8.55047	8.53829	0.390616	0.881518	-0.00205301	0.987455	0.02528	0.0251	0.0254	0.0003	0.99338	7.22e-09	FALSE	yes	0.999531	TRUE	no	NA	NA
ENST00000425457.6	ENSG00000066136.20	NFYC	protein_coding	protein_coding	30.9168	29.2349	32.0381	1.7581	0.757637	0.132052	0.476178	0.625295	0	1.04216	0	0.159351	6.71721	NA	0.01948	0	0.0324667	0.0324667	8e-09	8e-09	FALSE	yes	1	TRUE	no	NA	NA
ENST00000372652.5	ENSG00000066136.20	NFYC	protein_coding	protein_coding	30.9168	29.2349	32.0381	1.7581	0.757637	0.132052	0.476178	1.87313	1.43626	2.16437	0.0929969	0.235401	0.588265	0.26878	0.06002	0.0491	0.0673	0.0182	0.627484	8e-09	FALSE	yes	1	TRUE	no	NA	NA
ENST00000414185.1	ENSG00000066136.20	NFYC	protein_coding	protein_coding	30.9168	29.2349	32.0381	1.7581	0.757637	0.132052	0.476178	0.681232	1.15929	0.362526	0.384465	0.198721	-1.65022	NA	0.02304	0.0406	0.0113333	-0.0292667	0.732743	8e-09	NA	no	0.705262	TRUE	no	NA	NA
ENST00000308733.9	ENSG00000066136.20	NFYC	protein_coding	protein_coding	30.9168	29.2349	32.0381	1.7581	0.757637	0.132052	0.476178	1.25883	1.4089	1.15878	0.154905	0.17775	-0.279763	0.817103	0.0413	0.0487	0.0363667	-0.0123333	0.907713	8e-09	FALSE	yes	1	TRUE	no	NA	NA
ENST00000525349.1	ENSG00000066136.20	NFYC	protein_coding	retained_intron	30.9168	29.2349	32.0381	1.7581	0.757637	0.132052	0.476178	0.877164	0.6219	1.04734	0.6219	0.385256	0.742673	NA	0.02776	0.02005	0.0329	0.01285	0.919485	8e-09	NA	NA	0.043228	FALSE	NA	NA	NA
ENST00000372654.5	ENSG00000066136.20	NFYC	protein_coding	protein_coding	30.9168	29.2349	32.0381	1.7581	0.757637	0.132052	0.476178	0.793504	0.583548	0.933474	0.328671	0.197608	0.668619	NA	0.02594	0.0207	0.0294333	0.00873333	0.941444	8e-09	FALSE	yes	1	TRUE	no	NA	NA
ENST00000447388.7	ENSG00000066136.20	NFYC	protein_coding	protein_coding	30.9168	29.2349	32.0381	1.7581	0.757637	0.132052	0.476178	16.2218	15.5562	16.6656	1.01081	0.224213	0.099323	0.727801	0.52528	0.53195	0.520833	-0.0111167	0.959638	8e-09	FALSE	yes	1	TRUE	no	NA	NA
ENST00000467203.5	ENSG00000066136.20	NFYC	protein_coding	retained_intron	30.9168	29.2349	32.0381	1.7581	0.757637	0.132052	0.476178	5.07557	4.95701	5.15462	0.425989	0.37584	0.0562832	0.957723	0.16406	0.1693	0.160567	-0.00873333	0.959638	8e-09	NA	NA	0.99938	TRUE	NA	NA	NA
ENST00000525290.5	ENSG00000066136.20	NFYC	protein_coding	protein_coding	30.9168	29.2349	32.0381	1.7581	0.757637	0.132052	0.476178	0.503668	0.64229	0.411253	0.64229	0.411253	-0.630827	NA	0.01614	0.0207	0.0131	-0.0076	0.959638	8e-09	FALSE	yes	0.0945099	FALSE	no	NA	NA
ENST00000456393.6	ENSG00000066136.20	NFYC	protein_coding	protein_coding	30.9168	29.2349	32.0381	1.7581	0.757637	0.132052	0.476178	1.38049	1.38239	1.37923	0.301709	0.405113	-0.00327991	0.997675	0.04476	0.0481	0.0425333	-0.00556667	0.960773	8e-09	FALSE	yes	1	TRUE	no	NA	NA
ENST00000424419.6	ENSG00000066136.20	NFYC	protein_coding	retained_intron	30.9168	29.2349	32.0381	1.7581	0.757637	0.132052	0.476178	0.437133	0.441438	0.434263	0.200852	0.127058	-0.0231109	NA	0.01396	0.01475	0.0134333	-0.00131667	0.972717	8e-09	NA	NA	0.999528	TRUE	NA	NA	NA
ENST00000444344.5	ENSG00000160746.12	ANO10	protein_coding	protein_coding	29.9924	31.3516	29.0863	0.77656	1.18408	-0.108165	0.607977	0.662023	0	1.10337	0	0.223443	6.79879	NA	0.02262	0	0.0377	0.0377	8.2e-09	8.2e-09	FALSE	no	0.118658	FALSE	no	NA	NA
ENST00000427171.5	ENSG00000160746.12	ANO10	protein_coding	protein_coding	29.9924	31.3516	29.0863	0.77656	1.18408	-0.108165	0.607977	2.39324	3.68589	1.53147	0.137261	0.46454	-1.26161	NA	0.07816	0.11775	0.0517667	-0.0659833	0.415263	8.2e-09	FALSE	no	0.231297	FALSE	no	NA	NA
ENST00000292246.7	ENSG00000160746.12	ANO10	protein_coding	protein_coding	29.9924	31.3516	29.0863	0.77656	1.18408	-0.108165	0.607977	9.52945	7.9242	10.5996	1.04747	1.16338	0.419217	0.223977	0.3224	0.2537	0.3682	0.1145	0.609858	8.2e-09	FALSE	yes	1	TRUE	no	NA	NA
ENST00000413397.5	ENSG00000160746.12	ANO10	protein_coding	protein_coding	29.9924	31.3516	29.0863	0.77656	1.18408	-0.108165	0.607977	1.03126	1.60386	0.649518	0.411039	0.649518	-1.29103	NA	0.03464	0.05085	0.0238333	-0.0270167	0.641666	8.2e-09	FALSE	no	0.119131	FALSE	no	NA	NA
ENST00000448045.1	ENSG00000160746.12	ANO10	protein_coding	protein_coding	29.9924	31.3516	29.0863	0.77656	1.18408	-0.108165	0.607977	0.68613	0.402853	0.874981	0.178561	0.319361	1.10002	NA	0.0232	0.0127	0.0302	0.0175	0.720975	8.2e-09	NA	no	0.976778	TRUE	no	NA	NA
ENST00000396091.7	ENSG00000160746.12	ANO10	protein_coding	protein_coding	29.9924	31.3516	29.0863	0.77656	1.18408	-0.108165	0.607977	9.47034	11.3673	8.20571	1.23337	1.69827	-0.469698	0.433196	0.31176	0.3618	0.2784	-0.0834	0.799867	8.2e-09	FALSE	yes	1	TRUE	no	NA	NA
ENST00000350459.8	ENSG00000160746.12	ANO10	protein_coding	protein_coding	29.9924	31.3516	29.0863	0.77656	1.18408	-0.108165	0.607977	5.8621	6.16201	5.66215	0.0671828	0.591592	-0.121844	0.850203	0.19498	0.1967	0.193833	-0.00286667	0.991613	8.2e-09	FALSE	yes	1	TRUE	no	NA	NA
ENST00000393134.5	ENSG00000119950.20	MXI1	protein_coding	protein_coding	12.1778	14.8365	10.4054	0.420638	0.367212	-0.511398	0.00465457	0.484687	1.21172	0	0.161624	0	-6.93277	NA	0.03256	0.0814	0	-0.0814	9.89e-09	9.89e-09	FALSE	yes	0.996954	TRUE	no	NA	NA
ENST00000413388.2	ENSG00000109062.11	SLC9A3R1	protein_coding	protein_coding	972.498	906.936	1016.21	19.9286	12.8453	0.164118	0.0101453	509.757	508.216	510.785	7.28765	11.9607	0.007273	0.956093	0.52568	0.56045	0.5025	-0.05795	1.88e-07	9.89e-09	FALSE	yes	0.999156	TRUE	no	NA	NA
ENST00000262613.9	ENSG00000109062.11	SLC9A3R1	protein_coding	protein_coding	972.498	906.936	1016.21	19.9286	12.8453	0.164118	0.0101453	442.505	380.659	483.736	10.6689	1.46472	0.345712	2.59e-13	0.45356	0.41965	0.476167	0.0565167	9.89e-09	9.89e-09	FALSE	yes	1	TRUE	no	NA	NA
ENST00000485566.1	ENSG00000119950.20	MXI1	protein_coding	processed_transcript	12.1778	14.8365	10.4054	0.420638	0.367212	-0.511398	0.00465457	0.559826	0.520438	0.586085	0.020879	0.121515	0.168334	NA	0.0483	0.0351	0.0571	0.022	0.800981	9.89e-09	NA	NA	0.185466	FALSE	NA	NA	NA
ENST00000369612.1	ENSG00000119950.20	MXI1	protein_coding	protein_coding	12.1778	14.8365	10.4054	0.420638	0.367212	-0.511398	0.00465457	0.529657	0.450694	0.582298	0.0998403	0.582298	0.362516	NA	0.04448	0.0306	0.0537333	0.0231333	0.888166	9.89e-09	FALSE	yes	0.98352	TRUE	no	NA	NA
ENST00000484030.5	ENSG00000119950.20	MXI1	protein_coding	processed_transcript	12.1778	14.8365	10.4054	0.420638	0.367212	-0.511398	0.00465457	0.333724	0.339828	0.329655	0.13934	0.329655	-0.0425764	NA	0.02774	0.02315	0.0308	0.00765	0.925431	9.89e-09	NA	NA	0.417826	NA	NA	NA	NA
ENST00000581356.1	ENSG00000109062.11	SLC9A3R1	protein_coding	nonsense_mediated_decay	972.498	906.936	1016.21	19.9286	12.8453	0.164118	0.0101453	13.3044	11.5391	14.4812	2.35678	0.785434	0.3274	0.673739	0.01364	0.0127	0.0142667	0.00156667	0.944836	9.89e-09	NA	no	0.333382	NA	no	NA	NA
ENST00000239007.11	ENSG00000119950.20	MXI1	protein_coding	protein_coding	12.1778	14.8365	10.4054	0.420638	0.367212	-0.511398	0.00465457	6.78408	7.93819	6.01467	0.30963	0.708632	-0.399743	0.287034	0.56512	0.53605	0.5845	0.04845	0.959638	9.89e-09	FALSE	yes	0.993831	TRUE	no	NA	NA
ENST00000361248.8	ENSG00000119950.20	MXI1	protein_coding	protein_coding	12.1778	14.8365	10.4054	0.420638	0.367212	-0.511398	0.00465457	1.6214	2.1583	1.26347	0.0030567	0.664668	-0.767803	0.915221	0.12854	0.1456	0.117167	-0.0284333	0.959638	9.89e-09	FALSE	yes	0.964385	TRUE	no	NA	NA
ENST00000460667.5	ENSG00000119950.20	MXI1	protein_coding	processed_transcript	12.1778	14.8365	10.4054	0.420638	0.367212	-0.511398	0.00465457	0.935035	1.12928	0.805539	0.945768	0.120464	-0.482297	NA	0.076	0.07435	0.0771	0.00275	0.959638	9.89e-09	NA	NA	0.0736376	FALSE	NA	NA	NA
ENST00000332674.9	ENSG00000119950.20	MXI1	protein_coding	protein_coding	12.1778	14.8365	10.4054	0.420638	0.367212	-0.511398	0.00465457	0.817014	1.00647	0.690709	0.0742051	0.161905	-0.536686	0.632855	0.06732	0.06805	0.0668333	-0.00121667	0.988965	9.89e-09	FALSE	yes	0.999825	TRUE	no	NA	NA
ENST00000592369.1	ENSG00000064545.14	TMEM161A	protein_coding	protein_coding	27.2151	26.2045	27.8889	0.971647	0.483779	0.0898455	0.674113	0.591014	1.47753	0	0.407051	0	-7.21678	NA	0.02234	0.05585	0	-0.05585	1e-08	1e-08	FALSE	yes	0.166412	FALSE	no	NA	NA
ENST00000442312.6	ENSG00000087266.15	SH3BP2	protein_coding	protein_coding	20.57	19.9277	20.9982	2.05575	0.811782	0.075451	0.718514	0.269746	0.674365	0	0.348122	0	-6.09669	4.48e-09	0.01296	0.0324	0	-0.0324	0.00188653	1e-08	FALSE	yes	1	TRUE	no	NA	NA
ENST00000515183.5	ENSG00000087266.15	SH3BP2	protein_coding	processed_transcript	20.57	19.9277	20.9982	2.05575	0.811782	0.075451	0.718514	0.470928	0	0.78488	0	0.0636321	6.31267	NA	0.02236	0	0.0372667	0.0372667	1e-08	1e-08	NA	NA	0.126964	FALSE	NA	NA	NA
ENST00000513020.5	ENSG00000087266.15	SH3BP2	protein_coding	nonsense_mediated_decay	20.57	19.9277	20.9982	2.05575	0.811782	0.075451	0.718514	0.373179	0.0815606	0.567591	0.0815606	0.130849	2.65725	NA	0.0181	0.00455	0.0271333	0.0225833	0.194381	1e-08	TRUE	yes	0.355183	NA	no	NA	NA
ENST00000512131.5	ENSG00000087266.15	SH3BP2	protein_coding	retained_intron	20.57	19.9277	20.9982	2.05575	0.811782	0.075451	0.718514	0.605986	0	1.00998	0	0.506879	6.67239	NA	0.02786	0	0.0464333	0.0464333	0.535593	1e-08	NA	NA	0.701999	TRUE	NA	NA	NA
ENST00000356331.9	ENSG00000087266.15	SH3BP2	protein_coding	protein_coding	20.57	19.9277	20.9982	2.05575	0.811782	0.075451	0.718514	0.221298	0	0.36883	0	0.206666	5.24348	NA	0.01072	0	0.0178667	0.0178667	0.56841	1e-08	FALSE	yes	1	TRUE	no	NA	NA
ENST00000587406.5	ENSG00000064545.14	TMEM161A	protein_coding	retained_intron	27.2151	26.2045	27.8889	0.971647	0.483779	0.0898455	0.674113	1.23966	0.955924	1.42882	0.0737784	0.203163	0.574908	NA	0.04526	0.03665	0.051	0.01435	0.702729	1e-08	NA	NA	0.999974	TRUE	NA	NA	NA
ENST00000510204.5	ENSG00000087266.15	SH3BP2	protein_coding	retained_intron	20.57	19.9277	20.9982	2.05575	0.811782	0.075451	0.718514	0.341278	0.454084	0.266074	0.0972568	0.104145	-0.749332	NA	0.01642	0.02255	0.0123333	-0.0102167	0.84176	1e-08	NA	NA	1	TRUE	NA	NA	NA
ENST00000505941.5	ENSG00000087266.15	SH3BP2	protein_coding	retained_intron	20.57	19.9277	20.9982	2.05575	0.811782	0.075451	0.718514	0.698366	0.861461	0.589636	0.259998	0.536683	-0.539348	NA	0.03464	0.04505	0.0277	-0.01735	0.865428	1e-08	NA	NA	0.128933	FALSE	NA	NA	NA
ENST00000586357.1	ENSG00000064545.14	TMEM161A	protein_coding	retained_intron	27.2151	26.2045	27.8889	0.971647	0.483779	0.0898455	0.674113	0.994435	1.1796	0.870995	0.374184	0.16748	-0.433265	NA	0.03648	0.04455	0.0311	-0.01345	0.906714	1e-08	NA	NA	0.070269	FALSE	NA	NA	NA
ENST00000511663.5	ENSG00000087266.15	SH3BP2	protein_coding	retained_intron	20.57	19.9277	20.9982	2.05575	0.811782	0.075451	0.718514	2.49619	3.08282	2.1051	1.24771	0.46657	-0.5482	NA	0.12046	0.14985	0.100867	-0.0489833	0.908131	1e-08	NA	NA	0.589699	TRUE	NA	NA	NA
ENST00000587096.5	ENSG00000064545.14	TMEM161A	protein_coding	protein_coding	27.2151	26.2045	27.8889	0.971647	0.483779	0.0898455	0.674113	1.13947	0.857985	1.32713	0.446985	0.224288	0.623399	NA	0.04202	0.0334	0.0477667	0.0143667	0.927865	1e-08	FALSE	yes	0.490326	NA	no	NA	NA
ENST00000511237.5	ENSG00000087266.15	SH3BP2	protein_coding	retained_intron	20.57	19.9277	20.9982	2.05575	0.811782	0.075451	0.718514	0.240585	0.601463	0	0.601463	0	-5.93419	NA	0.01094	0.02735	0	-0.02735	0.928987	1e-08	NA	NA	0.883629	TRUE	NA	NA	NA
ENST00000162044.13	ENSG00000064545.14	TMEM161A	protein_coding	protein_coding	27.2151	26.2045	27.8889	0.971647	0.483779	0.0898455	0.674113	17.3672	16.1907	18.1515	0.131626	1.01046	0.16483	0.533354	0.63832	0.6189	0.651267	0.0323667	0.935667	1e-08	FALSE	yes	1	TRUE	no	NA	NA
ENST00000589448.5	ENSG00000064545.14	TMEM161A	protein_coding	retained_intron	27.2151	26.2045	27.8889	0.971647	0.483779	0.0898455	0.674113	0.710803	0.837059	0.626633	0.23555	0.158457	-0.412002	NA	0.02608	0.03165	0.0223667	-0.00928333	0.942538	1e-08	NA	NA	0.999999	TRUE	NA	NA	NA
ENST00000503219.5	ENSG00000087266.15	SH3BP2	protein_coding	protein_coding	20.57	19.9277	20.9982	2.05575	0.811782	0.075451	0.718514	0.315292	0.412963	0.250179	0.178476	0.129442	-0.701028	NA	0.0149	0.02	0.0115	-0.0085	0.955782	1e-08	FALSE	yes	0.189185	FALSE	no	NA	NA
ENST00000587583.6	ENSG00000064545.14	TMEM161A	protein_coding	protein_coding	27.2151	26.2045	27.8889	0.971647	0.483779	0.0898455	0.674113	1.0649	1.10196	1.04019	0.00930268	0.325807	-0.0824547	NA	0.03918	0.0421	0.0372333	-0.00486667	0.959638	1e-08	FALSE	yes	1	TRUE	no	NA	NA
ENST00000590216.6	ENSG00000064545.14	TMEM161A	protein_coding	nonsense_mediated_decay	27.2151	26.2045	27.8889	0.971647	0.483779	0.0898455	0.674113	0.831489	0.720499	0.905482	0.271915	0.159307	0.32565	NA	0.03046	0.02715	0.0326667	0.00551667	0.959638	1e-08	TRUE	yes	0.0486659	FALSE	no	NA	NA
ENST00000503393.6	ENSG00000087266.15	SH3BP2	protein_coding	protein_coding	20.57	19.9277	20.9982	2.05575	0.811782	0.075451	0.718514	5.02303	4.66856	5.25934	0.213314	0.166273	0.171558	0.283846	0.24506	0.2357	0.2513	0.0156	0.959638	1e-08	FALSE	yes	1	TRUE	no	NA	NA
ENST00000504450.1	ENSG00000087266.15	SH3BP2	protein_coding	retained_intron	20.57	19.9277	20.9982	2.05575	0.811782	0.075451	0.718514	0.244951	0.298877	0.209001	0.0783407	0.0334942	-0.496096	NA	0.01216	0.01555	0.0099	-0.00565	0.959638	1e-08	NA	NA	0.99354	TRUE	NA	NA	NA
ENST00000515802.5	ENSG00000087266.15	SH3BP2	protein_coding	retained_intron	20.57	19.9277	20.9982	2.05575	0.811782	0.075451	0.718514	0.3156	0.300732	0.325512	0.300732	0.18668	0.110695	NA	0.01524	0.0137	0.0162667	0.00256667	0.959638	1e-08	NA	NA	1	TRUE	NA	NA	NA
ENST00000452765.6	ENSG00000087266.15	SH3BP2	protein_coding	protein_coding	20.57	19.9277	20.9982	2.05575	0.811782	0.075451	0.718514	6.26635	5.91675	6.49942	0.353219	0.305373	0.135287	0.752906	0.30652	0.30195	0.309567	0.00761667	0.962098	1e-08	FALSE	yes	1	TRUE	no	NA	NA
ENST00000591443.1	ENSG00000064545.14	TMEM161A	protein_coding	retained_intron	27.2151	26.2045	27.8889	0.971647	0.483779	0.0898455	0.674113	1.04296	0.944364	1.10869	0.0981724	0.554366	0.2292	NA	0.03786	0.03595	0.0391333	0.00318333	0.962683	1e-08	NA	NA	1.31e-05	FALSE	NA	NA	NA
ENST00000513069.1	ENSG00000087266.15	SH3BP2	protein_coding	nonsense_mediated_decay	20.57	19.9277	20.9982	2.05575	0.811782	0.075451	0.718514	1.85883	1.87958	1.845	0.516263	0.126566	-0.0266486	NA	0.0921	0.09805	0.0881333	-0.00991667	0.974242	1e-08	NA	no	0.972708	TRUE	no	NA	NA
ENST00000587915.1	ENSG00000064545.14	TMEM161A	protein_coding	protein_coding	27.2151	26.2045	27.8889	0.971647	0.483779	0.0898455	0.674113	1.40726	1.34511	1.44869	0.0720094	0.190699	0.10627	NA	0.0519	0.0515	0.0521667	0.000666667	0.987933	1e-08	FALSE	yes	0.132779	FALSE	no	NA	NA
ENST00000494957.5	ENSG00000165359.15	INTS6L	protein_coding	processed_transcript	5.3747	4.75639	5.78691	0.586606	0.24313	0.282387	0.275741	0.633576	0	1.05596	0	0.191611	6.73601	NA	0.10826	0	0.180433	0.180433	1.08e-08	1.08e-08	NA	NA	0.937636	TRUE	NA	0	NA
ENST00000481908.5	ENSG00000165359.15	INTS6L	protein_coding	processed_transcript	5.3747	4.75639	5.78691	0.586606	0.24313	0.282387	0.275741	0.308976	0.112146	0.440195	0.112146	0.191968	1.88195	NA	0.05664	0.0269	0.0764667	0.0495667	0.81841	1.08e-08	NA	NA	1	TRUE	NA	1	NA
ENST00000481429.1	ENSG00000165359.15	INTS6L	protein_coding	processed_transcript	5.3747	4.75639	5.78691	0.586606	0.24313	0.282387	0.275741	0.146356	0.36589	0	0.36589	0	-5.23224	NA	0.0274	0.0685	0	-0.0685	0.921019	1.08e-08	NA	NA	0.481246	NA	NA	0	NA
ENST00000639893.1	ENSG00000165359.15	INTS6L	protein_coding	protein_coding	5.3747	4.75639	5.78691	0.586606	0.24313	0.282387	0.275741	1.68003	1.83178	1.57887	0.955001	0.287634	-0.213102	0.907225	0.30912	0.36595	0.271233	-0.0947167	0.956018	1.08e-08	FALSE	yes	1	TRUE	no	1	NA
ENST00000370752.4	ENSG00000165359.15	INTS6L	protein_coding	protein_coding	5.3747	4.75639	5.78691	0.586606	0.24313	0.282387	0.275741	1.80545	1.74536	1.84551	0.783019	0.417387	0.0800464	0.966275	0.35058	0.39325	0.322133	-0.0711167	0.961693	1.08e-08	FALSE	yes	1	TRUE	no	1	NA
ENST00000493637.6	ENSG00000165359.15	INTS6L	protein_coding	retained_intron	5.3747	4.75639	5.78691	0.586606	0.24313	0.282387	0.275741	0.800317	0.701218	0.866383	0.160879	0.0406006	0.30127	0.662817	0.14804	0.1455	0.149733	0.00423333	0.977115	1.08e-08	NA	NA	1	TRUE	NA	3	NA
ENST00000472142.1	ENSG00000115738.9	ID2	protein_coding	retained_intron	81.1926	80.6304	81.5674	4.89613	2.81888	0.0166678	0.920042	6.71503	11.042	3.8304	1.44841	0.74447	-1.52497	NA	0.08374	0.13855	0.0472	-0.09135	0.0171411	1.3e-08	NA	NA	0.114105	FALSE	NA	NA	NA
ENST00000331129.3	ENSG00000115738.9	ID2	protein_coding	protein_coding	81.1926	80.6304	81.5674	4.89613	2.81888	0.0166678	0.920042	18.2889	13.5538	21.4456	1.51452	1.18757	0.66159	0.0301692	0.22464	0.1676	0.262667	0.0950667	1.3e-08	1.3e-08	FALSE	yes	0.864724	TRUE	no	NA	NA
ENST00000396290.1	ENSG00000115738.9	ID2	protein_coding	protein_coding	81.1926	80.6304	81.5674	4.89613	2.81888	0.0166678	0.920042	55.9647	56.0346	55.9181	4.83002	2.44477	-0.00300093	0.995997	0.6888	0.69385	0.685433	-0.00841667	0.966739	1.3e-08	FALSE	yes	0.676637	TRUE	no	NA	NA
ENST00000534301.5	ENSG00000137502.9	RAB30	protein_coding	protein_coding	20.7696	22.9005	19.3491	0.175655	1.92913	-0.242998	0.231402	0.390082	0.975205	0	0.0372579	0	-6.62235	NA	0.01704	0.0426	0	-0.0426	1.52e-08	1.52e-08	FALSE	yes	0.0839579	FALSE	no	NA	NA
ENST00000527633.5	ENSG00000137502.9	RAB30	protein_coding	protein_coding	20.7696	22.9005	19.3491	0.175655	1.92913	-0.242998	0.231402	5.33355	4.92306	5.60722	1.19399	0.614702	0.187373	0.890769	0.26532	0.2154	0.2986	0.0832	0.874594	1.52e-08	FALSE	yes	0.999547	TRUE	no	NA	NA
ENST00000533014.5	ENSG00000137502.9	RAB30	protein_coding	protein_coding	20.7696	22.9005	19.3491	0.175655	1.92913	-0.242998	0.231402	3.77436	4.99015	2.96383	1.63597	1.37569	-0.749648	NA	0.1749	0.21735	0.1466	-0.07075	0.927592	1.52e-08	FALSE	yes	0.114241	FALSE	no	NA	NA
ENST00000532548.5	ENSG00000137502.9	RAB30	protein_coding	protein_coding	20.7696	22.9005	19.3491	0.175655	1.92913	-0.242998	0.231402	0.521308	0.16039	0.76192	0.16039	0.404743	2.17961	NA	0.02518	0.00695	0.0373333	0.0303833	0.932321	1.52e-08	FALSE	yes	0.792056	TRUE	no	NA	NA
ENST00000524635.1	ENSG00000137502.9	RAB30	protein_coding	protein_coding	20.7696	22.9005	19.3491	0.175655	1.92913	-0.242998	0.231402	0.696602	0.917557	0.549298	0.917557	0.229996	-0.729818	NA	0.0336	0.0404	0.0290667	-0.0113333	0.959638	1.52e-08	FALSE	yes	0.0417414	FALSE	no	NA	NA
ENST00000533276.6	ENSG00000137502.9	RAB30	protein_coding	protein_coding	20.7696	22.9005	19.3491	0.175655	1.92913	-0.242998	0.231402	0.314557	0.219194	0.378132	0.219194	0.27209	0.759978	NA	0.0142	0.00965	0.0172333	0.00758333	0.959638	1.52e-08	FALSE	yes	0.0372846	FALSE	no	NA	NA
ENST00000612684.4	ENSG00000137502.9	RAB30	protein_coding	protein_coding	20.7696	22.9005	19.3491	0.175655	1.92913	-0.242998	0.231402	2.40657	2.58308	2.28889	0.0268607	0.361018	-0.173729	0.804746	0.11534	0.1128	0.117033	0.00423333	0.962098	1.52e-08	FALSE	yes	0.987233	TRUE	no	NA	NA
ENST00000260056.6	ENSG00000137502.9	RAB30	protein_coding	protein_coding	20.7696	22.9005	19.3491	0.175655	1.92913	-0.242998	0.231402	0.337618	0.360878	0.322112	0.360878	0.209281	-0.159275	NA	0.01594	0.01565	0.0161333	0.000483333	0.964183	1.52e-08	FALSE	yes	0.998979	TRUE	no	NA	NA
ENST00000533486.5	ENSG00000137502.9	RAB30	protein_coding	protein_coding	20.7696	22.9005	19.3491	0.175655	1.92913	-0.242998	0.231402	2.86969	3.08153	2.72847	0.394993	0.3114	-0.174949	0.739347	0.14068	0.1347	0.144667	0.00996667	0.977874	1.52e-08	FALSE	yes	0.987233	TRUE	no	NA	NA
ENST00000534141.5	ENSG00000137502.9	RAB30	protein_coding	protein_coding	20.7696	22.9005	19.3491	0.175655	1.92913	-0.242998	0.231402	3.88052	4.27597	3.61689	0.615934	0.419876	-0.240888	0.69959	0.1864	0.18655	0.1863	-0.00025	1	1.52e-08	FALSE	yes	0.661959	TRUE	no	NA	NA
ENST00000484866.5	ENSG00000121864.9	ZNF639	protein_coding	protein_coding	34.8647	35.6719	34.3265	1.46873	0.567085	-0.0554514	0.848558	12.2989	15.5022	10.1634	0.605992	0.503909	-0.608606	0.000311721	0.3513	0.4346	0.295767	-0.138833	1.78e-08	1.78e-08	FALSE	no	1	TRUE	no	0	NA
ENST00000621687.1	ENSG00000121864.9	ZNF639	protein_coding	protein_coding	34.8647	35.6719	34.3265	1.46873	0.567085	-0.0554514	0.848558	12.2973	10.5151	13.4855	0.199967	0.349304	0.358652	0.060421	0.35404	0.29505	0.393367	0.0983167	0.0057377	1.78e-08	FALSE	no	1	TRUE	no	0	NA
ENST00000491818.5	ENSG00000121864.9	ZNF639	protein_coding	protein_coding	34.8647	35.6719	34.3265	1.46873	0.567085	-0.0554514	0.848558	5.72707	5.20203	6.0771	0.71111	0.455169	0.223908	0.742386	0.16414	0.14525	0.176733	0.0314833	0.678624	1.78e-08	FALSE	no	0.277921	NA	no	0	NA
ENST00000496856.5	ENSG00000121864.9	ZNF639	protein_coding	protein_coding	34.8647	35.6719	34.3265	1.46873	0.567085	-0.0554514	0.848558	0.516549	0.651438	0.426623	0.0703182	0.243314	-0.599217	NA	0.0149	0.01835	0.0126	-0.00575	0.935667	1.78e-08	FALSE	no	1	TRUE	no	0	NA
ENST00000483460.5	ENSG00000121864.9	ZNF639	protein_coding	retained_intron	34.8647	35.6719	34.3265	1.46873	0.567085	-0.0554514	0.848558	0.414175	0.140341	0.596731	0.140341	0.300461	2.01282	NA	0.01196	0.0041	0.0172	0.0131	0.944265	1.78e-08	NA	NA	0.0824054	FALSE	NA	0	NA
ENST00000326361.7	ENSG00000121864.9	ZNF639	protein_coding	protein_coding	34.8647	35.6719	34.3265	1.46873	0.567085	-0.0554514	0.848558	1.66929	1.66301	1.67347	0.0089845	0.0666618	0.00899562	0.994244	0.04798	0.0467	0.0488333	0.00213333	0.966528	1.78e-08	FALSE	no	1	TRUE	no	0	NA
ENST00000481587.5	ENSG00000121864.9	ZNF639	protein_coding	protein_coding	34.8647	35.6719	34.3265	1.46873	0.567085	-0.0554514	0.848558	0.68606	0.755499	0.639768	0.31711	0.0909124	-0.236475	NA	0.0198	0.0216	0.0186	-0.003	0.976677	1.78e-08	FALSE	no	0.135529	FALSE	no	0	NA
ENST00000466663.1	ENSG00000121864.9	ZNF639	protein_coding	processed_transcript	34.8647	35.6719	34.3265	1.46873	0.567085	-0.0554514	0.848558	1.14715	1.15567	1.14147	0.383789	0.0699923	-0.0176815	NA	0.03278	0.032	0.0333	0.0013	0.988677	1.78e-08	NA	NA	0.0635887	FALSE	NA	0	NA
ENST00000561277.5	ENSG00000140391.14	TSPAN3	protein_coding	protein_coding	107.046	106.512	107.401	1.96168	0.487845	0.01199	0.911573	79.8827	82.7833	77.9489	0.0720924	0.593943	-0.0867996	0.372446	0.74646	0.7775	0.725767	-0.0517333	0.00930977	1.9e-08	FALSE	no	0.290011	NA	no	NA	NA
ENST00000558394.5	ENSG00000140391.14	TSPAN3	protein_coding	processed_transcript	107.046	106.512	107.401	1.96168	0.487845	0.01199	0.911573	6.15355	3.36449	8.01293	0.214213	0.595698	1.24946	NA	0.05736	0.03155	0.0745667	0.0430167	1.9e-08	1.9e-08	NA	NA	0.342049	NA	NA	NA	NA
ENST00000346495.6	ENSG00000140391.14	TSPAN3	protein_coding	protein_coding	107.046	106.512	107.401	1.96168	0.487845	0.01199	0.911573	18.2586	17.1469	18.9997	0.355643	0.737568	0.147946	0.478241	0.1705	0.161	0.176833	0.0158333	0.607325	1.9e-08	FALSE	yes	0.99982	TRUE	no	NA	NA
ENST00000424443.7	ENSG00000140391.14	TSPAN3	protein_coding	protein_coding	107.046	106.512	107.401	1.96168	0.487845	0.01199	0.911573	1.40304	1.91334	1.06284	0.873441	0.804403	-0.842173	NA	0.0131	0.0178	0.00996667	-0.00783333	0.925547	1.9e-08	FALSE	yes	0.992217	TRUE	no	NA	NA
ENST00000431044.5	ENSG00000184702.18	2005-09-01	protein_coding	nonsense_mediated_decay	11.2864	14.1105	9.40361	1.99872	1.14217	-0.584968	0.0376809	0.633364	1.58341	0	0.159948	0	-7.31597	NA	0.04646	0.11615	0	-0.11615	1.99e-08	1.99e-08	TRUE	yes	0.999999	TRUE	no	0	TRUE
ENST00000455784.6	ENSG00000184702.18	2005-09-01	protein_coding	protein_coding	11.2864	14.1105	9.40361	1.99872	1.14217	-0.584968	0.0376809	4.56068	4.16436	4.82489	0.0659349	0.815295	0.21193	0.802302	0.42688	0.3005	0.511133	0.210633	0.0722501	1.99e-08	FALSE	yes	1	TRUE	no	0	TRUE
ENST00000412544.5	ENSG00000184702.18	2005-09-01	protein_coding	protein_coding	11.2864	14.1105	9.40361	1.99872	1.14217	-0.584968	0.0376809	2.31114	3.73081	1.36469	0.529555	0.208759	-1.44425	NA	0.19574	0.2644	0.149967	-0.114433	0.167599	1.99e-08	FALSE	yes	0.549591	TRUE	no	0	TRUE
ENST00000470814.1	ENSG00000184702.18	2005-09-01	protein_coding	retained_intron	11.2864	14.1105	9.40361	1.99872	1.14217	-0.584968	0.0376809	0.314622	0.187073	0.399655	0.00663376	0.143338	1.05568	NA	0.02978	0.0136	0.0405667	0.0269667	0.313253	1.99e-08	NA	NA	0.863659	TRUE	NA	1	TRUE
ENST00000455843.5	ENSG00000184702.18	2005-09-01	protein_coding	nonsense_mediated_decay	11.2864	14.1105	9.40361	1.99872	1.14217	-0.584968	0.0376809	0.425596	0.412963	0.434018	0.178476	0.071103	0.0700865	NA	0.03938	0.02805	0.0469333	0.0188833	0.852077	1.99e-08	TRUE	yes	0.999929	TRUE	no	0	TRUE
ENST00000477238.1	ENSG00000184702.18	2005-09-01	protein_coding	retained_intron	11.2864	14.1105	9.40361	1.99872	1.14217	-0.584968	0.0376809	0.276172	0.444231	0.164132	0.0670129	0.0849127	-1.38324	NA	0.0227	0.0314	0.0169	-0.0145	0.883241	1.99e-08	NA	NA	0.183934	FALSE	NA	1	TRUE
ENST00000395109.6	ENSG00000184702.18	2005-09-01	protein_coding	protein_coding	11.2864	14.1105	9.40361	1.99872	1.14217	-0.584968	0.0376809	1.36069	1.52623	1.25034	0.0275517	0.338949	-0.285583	NA	0.12228	0.1101	0.1304	0.0203	0.959638	1.99e-08	FALSE	yes	0.169922	FALSE	no	0	TRUE
ENST00000406395.5	ENSG00000184702.18	2005-09-01	protein_coding	protein_coding	11.2864	14.1105	9.40361	1.99872	1.14217	-0.584968	0.0376809	0.374196	0.506852	0.285759	0.166023	0.160096	-0.805329	NA	0.03342	0.0384	0.0301	-0.0083	0.959638	1.99e-08	FALSE	yes	1	TRUE	no	0	TRUE
ENST00000480423.5	ENSG00000184702.18	2005-09-01	protein_coding	retained_intron	11.2864	14.1105	9.40361	1.99872	1.14217	-0.584968	0.0376809	0.842973	1.18288	0.616369	1.18288	0.109302	-0.929361	NA	0.06938	0.07345	0.0666667	-0.00678333	0.959638	1.99e-08	NA	NA	0.540874	TRUE	NA	1	TRUE
ENST00000526334.5	ENSG00000162300.11	ZFPL1	protein_coding	protein_coding	40.1154	37.843	41.6303	0.610561	1.11866	0.137573	0.477061	0.485139	0	0.808565	0	0.0727474	6.35502	NA	0.01162	0	0.0193667	0.0193667	2.01e-08	2.01e-08	FALSE	no	0.151573	FALSE	no	NA	NA
ENST00000526440.1	ENSG00000162300.11	ZFPL1	protein_coding	retained_intron	40.1154	37.843	41.6303	0.610561	1.11866	0.137573	0.477061	1.10721	0.69851	1.37968	0.117096	0.184116	0.971896	NA	0.02742	0.0185	0.0333667	0.0148667	0.515471	2.01e-08	NA	NA	0.124194	FALSE	NA	NA	NA
ENST00000294258.7	ENSG00000162300.11	ZFPL1	protein_coding	protein_coding	40.1154	37.843	41.6303	0.610561	1.11866	0.137573	0.477061	27.5915	25.8597	28.7461	0.698484	0.421225	0.152603	0.36609	0.6881	0.6838	0.690967	0.00716667	0.959638	2.01e-08	FALSE	no	0.999984	TRUE	no	NA	NA
ENST00000525509.1	ENSG00000162300.11	ZFPL1	protein_coding	protein_coding	40.1154	37.843	41.6303	0.610561	1.11866	0.137573	0.477061	4.78041	4.91556	4.69031	1.49002	0.630032	-0.0675332	NA	0.11932	0.1293	0.112667	-0.0166333	0.959638	2.01e-08	FALSE	no	0.0642333	FALSE	no	NA	NA
ENST00000532200.1	ENSG00000162300.11	ZFPL1	protein_coding	protein_coding	40.1154	37.843	41.6303	0.610561	1.11866	0.137573	0.477061	1.37465	1.48707	1.2997	0.123753	0.753583	-0.192903	NA	0.03394	0.0394	0.0303	-0.0091	0.959638	2.01e-08	FALSE	no	0.222673	FALSE	no	NA	NA
ENST00000533216.1	ENSG00000162300.11	ZFPL1	protein_coding	retained_intron	40.1154	37.843	41.6303	0.610561	1.11866	0.137573	0.477061	2.39021	2.10317	2.58157	0.0581908	0.0339031	0.294419	NA	0.05952	0.05565	0.0621	0.00645	0.959638	2.01e-08	NA	NA	0.119664	FALSE	NA	NA	NA
ENST00000528123.1	ENSG00000162300.11	ZFPL1	protein_coding	retained_intron	40.1154	37.843	41.6303	0.610561	1.11866	0.137573	0.477061	1.75896	1.66388	1.82235	0.711568	0.439196	0.130493	NA	0.04418	0.0443	0.0441	-0.0002	0.997028	2.01e-08	NA	NA	0.0625068	FALSE	NA	NA	NA
ENST00000460615.1	ENSG00000138459.8	SLC35A5	protein_coding	retained_intron	14.1457	14.603	13.8409	0.659055	1.00123	-0.0772671	0.842882	0.791988	0	1.31998	0	0.259926	7.05526	NA	0.05822	0	0.0970333	0.0970333	2.06e-08	2.06e-08	NA	NA	0.159005	FALSE	NA	NA	NA
ENST00000261034.6	ENSG00000138459.8	SLC35A5	protein_coding	protein_coding	14.1457	14.603	13.8409	0.659055	1.00123	-0.0772671	0.842882	5.64014	6.47168	5.08578	0.226487	0.432047	-0.347064	0.28701	0.39804	0.4434	0.3678	-0.0756	0.346703	2.06e-08	FALSE	yes	0.960361	TRUE	no	NA	NA
ENST00000492406.5	ENSG00000138459.8	SLC35A5	protein_coding	protein_coding	14.1457	14.603	13.8409	0.659055	1.00123	-0.0772671	0.842882	0.770222	0.536925	0.925753	0.13595	0.172259	0.774784	0.357861	0.05572	0.03645	0.0685667	0.0321167	0.699033	2.06e-08	FALSE	yes	0.999999	TRUE	no	NA	NA
ENST00000460713.5	ENSG00000138459.8	SLC35A5	protein_coding	processed_transcript	14.1457	14.603	13.8409	0.659055	1.00123	-0.0772671	0.842882	5.67578	6.06211	5.41824	0.207866	0.385121	-0.161714	0.773775	0.40104	0.4153	0.391533	-0.0237667	0.935667	2.06e-08	NA	NA	0.999955	TRUE	NA	NA	NA
ENST00000484995.5	ENSG00000138459.8	SLC35A5	protein_coding	protein_coding	14.1457	14.603	13.8409	0.659055	1.00123	-0.0772671	0.842882	0.438838	0.598608	0.332324	0.257779	0.204515	-0.830149	NA	0.02956	0.04025	0.0224333	-0.0178167	0.942168	2.06e-08	FALSE	yes	0.159519	FALSE	no	NA	NA
ENST00000468642.5	ENSG00000138459.8	SLC35A5	protein_coding	protein_coding	14.1457	14.603	13.8409	0.659055	1.00123	-0.0772671	0.842882	0.668989	0.662998	0.672982	0.101633	0.346882	0.0212452	NA	0.04608	0.0452	0.0466667	0.00146667	0.960136	2.06e-08	FALSE	no	0.0695985	FALSE	no	NA	NA
ENST00000494706.1	ENSG00000138459.8	SLC35A5	protein_coding	protein_coding	14.1457	14.603	13.8409	0.659055	1.00123	-0.0772671	0.842882	0.159788	0.270658	0.0858742	0.270658	0.0441857	-1.5496	NA	0.01134	0.0194	0.00596667	-0.0134333	0.985184	2.06e-08	FALSE	yes	0.683703	TRUE	no	NA	NA
ENST00000339105.8	ENSG00000125246.15	CLYBL	protein_coding	protein_coding	1.03705	1.3694	0.81548	0.0440392	0.141751	-0.740735	NA	0.369828	0.924571	0	0.0477944	0	-6.54623	NA	0.26988	0.6747	0	-0.6747	2.3e-08	2.3e-08	FALSE	yes	0.999999	TRUE	no	0	TRUE
ENST00000495146.5	ENSG00000084733.10	RAB10	protein_coding	retained_intron	148.584	137.754	155.805	0.732526	2.61617	0.177627	0.0249055	8.36607	4.73298	10.7881	0.232027	0.610752	1.18692	1.12e-07	0.0553	0.03435	0.0692667	0.0349167	2.3e-08	2.3e-08	NA	NA	0.375108	NA	NA	NA	NA
ENST00000479033.1	ENSG00000196372.12	ASB13	protein_coding	processed_transcript	24.6985	25.9667	23.853	1.9984	1.09047	-0.122445	0.607988	0.7661	0	1.27683	0	0.352722	7.00768	NA	0.03146	0	0.0524333	0.0524333	2.3e-08	2.3e-08	NA	NA	0.646742	TRUE	NA	NA	NA
ENST00000264710.4	ENSG00000084733.10	RAB10	protein_coding	protein_coding	148.584	137.754	155.805	0.732526	2.61617	0.177627	0.0249055	71.7294	71.8261	71.6649	0.181772	1.48903	-0.00324044	0.992161	0.48482	0.5214	0.460433	-0.0609667	0.147442	2.3e-08	FALSE	yes	0.888217	TRUE	no	NA	NA
ENST00000376354.5	ENSG00000125246.15	CLYBL	protein_coding	protein_coding	1.03705	1.3694	0.81548	0.0440392	0.141751	-0.740735	NA	0.115347	0.0101951	0.185448	0.0101951	0.0930657	3.27471	NA	0.16936	0.0077	0.277133	0.269433	0.636204	2.3e-08	FALSE	yes	0.999995	TRUE	no	0	TRUE
ENST00000482921.1	ENSG00000196372.12	ASB13	protein_coding	processed_transcript	24.6985	25.9667	23.853	1.9984	1.09047	-0.122445	0.607988	0.342078	0.533023	0.214781	0.272389	0.214781	-1.27249	NA	0.01334	0.01985	0.009	-0.01085	0.804268	2.3e-08	NA	NA	0.0809089	FALSE	NA	NA	NA
ENST00000473035.1	ENSG00000084733.10	RAB10	protein_coding	processed_transcript	148.584	137.754	155.805	0.732526	2.61617	0.177627	0.0249055	66.1908	58.7108	71.1775	1.47562	3.94373	0.277753	0.168168	0.44422	0.42615	0.456267	0.0301167	0.823146	2.3e-08	NA	NA	0.808444	TRUE	NA	NA	NA
ENST00000462003.5	ENSG00000084733.10	RAB10	protein_coding	processed_transcript	148.584	137.754	155.805	0.732526	2.61617	0.177627	0.0249055	2.29822	2.48454	2.17401	0.329299	0.573116	-0.191798	NA	0.01566	0.01805	0.0140667	-0.00398333	0.938716	2.3e-08	NA	NA	0.0942211	FALSE	NA	NA	NA
ENST00000416504.5	ENSG00000125246.15	CLYBL	protein_coding	protein_coding	1.03705	1.3694	0.81548	0.0440392	0.141751	-0.740735	NA	0.152878	0.266414	0.0771871	0.174659	0.0771871	-1.66465	NA	0.16306	0.19065	0.144667	-0.0459833	0.945995	2.3e-08	FALSE	yes	0.938803	TRUE	no	0	TRUE
ENST00000493897.1	ENSG00000196372.12	ASB13	protein_coding	processed_transcript	24.6985	25.9667	23.853	1.9984	1.09047	-0.122445	0.607988	4.77321	5.43652	4.33101	0.945597	0.756024	-0.327305	0.78478	0.1908	0.2078	0.179467	-0.0283333	0.948154	2.3e-08	NA	NA	0.0689557	FALSE	NA	NA	NA
ENST00000419700.1	ENSG00000125246.15	CLYBL	protein_coding	protein_coding	1.03705	1.3694	0.81548	0.0440392	0.141751	-0.740735	NA	0.196526	0	0.327543	0	0.327543	5.077	NA	0.2	0	0.333333	0.333333	0.959638	2.3e-08	FALSE	yes	0.232577	FALSE	no	0	TRUE
ENST00000357700.10	ENSG00000196372.12	ASB13	protein_coding	protein_coding	24.6985	25.9667	23.853	1.9984	1.09047	-0.122445	0.607988	16.0841	17.0804	15.4199	1.34211	0.240513	-0.147458	0.490508	0.65258	0.6577	0.649167	-0.00853333	0.964183	2.3e-08	FALSE	yes	0.999812	TRUE	no	NA	NA
ENST00000443887.1	ENSG00000125246.15	CLYBL	protein_coding	protein_coding	1.03705	1.3694	0.81548	0.0440392	0.141751	-0.740735	NA	0.198497	0.168219	0.218682	0.168219	0.218682	0.359694	NA	0.19182	0.1269	0.2351	0.1082	0.978718	2.3e-08	FALSE	yes	0.709048	TRUE	no	0	TRUE
ENST00000459912.5	ENSG00000196372.12	ASB13	protein_coding	nonsense_mediated_decay	24.6985	25.9667	23.853	1.9984	1.09047	-0.122445	0.607988	2.73298	2.91676	2.61045	0.5617	0.196686	-0.159489	0.862435	0.11184	0.11465	0.109967	-0.00468333	0.993945	2.3e-08	TRUE	yes	0.976709	TRUE	no	NA	NA
ENST00000466323.5	ENSG00000010404.17	IDS	protein_coding	nonsense_mediated_decay	18.7073	28.5672	12.134	1.30552	0.4446	-1.23462	6.81e-32	2.9816	6.15	0.869335	0.756803	0.0614285	-2.80845	8.1e-15	0.12882	0.2145	0.0717	-0.1428	2.35e-08	2.35e-08	TRUE	yes	0.999998	TRUE	yes	0	TRUE
ENST00000370441.8	ENSG00000010404.17	IDS	protein_coding	protein_coding	18.7073	28.5672	12.134	1.30552	0.4446	-1.23462	6.81e-32	5.13515	6.20339	4.42299	0.178731	0.616639	-0.487099	0.379865	0.30422	0.2179	0.361767	0.143867	0.0549594	2.35e-08	FALSE	yes	1	TRUE	yes	0	TRUE
ENST00000464251.5	ENSG00000010404.17	IDS	protein_coding	nonsense_mediated_decay	18.7073	28.5672	12.134	1.30552	0.4446	-1.23462	6.81e-32	3.10634	4.62744	2.09228	0.294533	0.0628297	-1.14138	0.0142647	0.16844	0.16185	0.172833	0.0109833	0.959638	2.35e-08	TRUE	yes	0.853963	TRUE	no	0	TRUE
ENST00000428056.6	ENSG00000010404.17	IDS	protein_coding	protein_coding	18.7073	28.5672	12.134	1.30552	0.4446	-1.23462	6.81e-32	0.775056	1.22166	0.477324	0.181758	0.0904137	-1.33765	NA	0.04096	0.04255	0.0399	-0.00265	0.962846	2.35e-08	FALSE	yes	0.976052	TRUE	yes	0	TRUE
ENST00000340855.10	ENSG00000010404.17	IDS	protein_coding	protein_coding	18.7073	28.5672	12.134	1.30552	0.4446	-1.23462	6.81e-32	6.35123	9.72437	4.10247	0.0594337	0.254802	-1.24308	5.93e-26	0.33996	0.341	0.339267	-0.00173333	0.967956	2.35e-08	FALSE	yes	1	TRUE	yes	0	TRUE
ENST00000424598.5	ENSG00000106638.15	TBL2	protein_coding	nonsense_mediated_decay	31.2888	31.134	31.3919	0.202183	0.568257	0.0118966	0.93285	3.11684	5.40839	1.58914	0.606707	0.176076	-1.76057	2.13e-08	0.09992	0.17385	0.0506333	-0.123217	2.41e-08	2.41e-08	TRUE	no	0.999979	TRUE	yes	0	TRUE
ENST00000570391.5	ENSG00000185813.10	PCYT2	protein_coding	protein_coding	25.3425	23.2546	26.7344	0.733715	1.50233	0.201099	0.225239	0.581579	1.45395	0	0.391362	0	-7.19372	NA	0.02524	0.0631	0	-0.0631	2.41e-08	2.41e-08	FALSE	yes	1	TRUE	no	NA	NA
ENST00000488915.1	ENSG00000106638.15	TBL2	protein_coding	retained_intron	31.2888	31.134	31.3919	0.202183	0.568257	0.0118966	0.93285	1.81149	2.53031	1.33227	0.236419	0.155154	-0.92033	NA	0.0579	0.08125	0.0423333	-0.0389167	0.0435679	2.41e-08	NA	NA	0.966454	TRUE	NA	0	TRUE
ENST00000450285.5	ENSG00000106638.15	TBL2	protein_coding	nonsense_mediated_decay	31.2888	31.134	31.3919	0.202183	0.568257	0.0118966	0.93285	4.90708	2.77544	6.32817	1.73554	1.10495	1.18616	0.206183	0.15624	0.0888	0.2012	0.1124	0.505789	2.41e-08	TRUE	yes	0.999758	TRUE	yes	0	TRUE
ENST00000496056.5	ENSG00000106638.15	TBL2	protein_coding	retained_intron	31.2888	31.134	31.3919	0.202183	0.568257	0.0118966	0.93285	0.700005	0	1.16668	0	0.743037	6.87857	NA	0.02182	0	0.0363667	0.0363667	0.550526	2.41e-08	NA	NA	0.273176	NA	NA	0	TRUE
ENST00000538721.6	ENSG00000185813.10	PCYT2	protein_coding	protein_coding	25.3425	23.2546	26.7344	0.733715	1.50233	0.201099	0.225239	8.26468	6.54025	9.4143	0.565717	0.848337	0.524835	0.0942582	0.3241	0.2823	0.351967	0.0696667	0.583075	2.41e-08	FALSE	yes	1	TRUE	no	NA	NA
ENST00000574155.1	ENSG00000185813.10	PCYT2	protein_coding	retained_intron	25.3425	23.2546	26.7344	0.733715	1.50233	0.201099	0.225239	1.34577	0.883131	1.65419	0.432034	0.189396	0.897879	NA	0.05232	0.0386	0.0614667	0.0228667	0.773878	2.41e-08	NA	NA	0.0767278	FALSE	NA	NA	NA
ENST00000495885.1	ENSG00000106638.15	TBL2	protein_coding	retained_intron	31.2888	31.134	31.3919	0.202183	0.568257	0.0118966	0.93285	0.422723	0.545157	0.341099	0.0863789	0.0247321	-0.661017	NA	0.01352	0.0175	0.0108667	-0.00663333	0.830569	2.41e-08	NA	NA	0.23312	FALSE	NA	1	TRUE
ENST00000469518.1	ENSG00000106638.15	TBL2	protein_coding	retained_intron	31.2888	31.134	31.3919	0.202183	0.568257	0.0118966	0.93285	1.54852	2.27972	1.06105	0.615677	0.721351	-1.09614	NA	0.05002	0.07335	0.0344667	-0.0388833	0.885997	2.41e-08	NA	NA	0.1724	FALSE	NA	0	TRUE
ENST00000435792.5	ENSG00000106638.15	TBL2	protein_coding	nonsense_mediated_decay	31.2888	31.134	31.3919	0.202183	0.568257	0.0118966	0.93285	0.761575	0.599523	0.86961	0.232501	0.151237	0.529183	NA	0.02434	0.01925	0.0277333	0.00848333	0.889465	2.41e-08	TRUE	no	0.137561	FALSE	yes	0	TRUE
ENST00000305632.9	ENSG00000106638.15	TBL2	protein_coding	protein_coding	31.2888	31.134	31.3919	0.202183	0.568257	0.0118966	0.93285	15.2093	14.7304	15.5285	0.786493	0.26043	0.0760706	0.754684	0.4865	0.4733	0.4953	0.022	0.931601	2.41e-08	FALSE	yes	1	TRUE	yes	0	TRUE
ENST00000576343.5	ENSG00000185813.10	PCYT2	protein_coding	protein_coding	25.3425	23.2546	26.7344	0.733715	1.50233	0.201099	0.225239	1.40985	1.04299	1.65443	0.390501	0.409133	0.660542	NA	0.05412	0.0444	0.0606	0.0162	0.934532	2.41e-08	FALSE	yes	0.54933	TRUE	no	NA	NA
ENST00000570388.5	ENSG00000185813.10	PCYT2	protein_coding	protein_coding	25.3425	23.2546	26.7344	0.733715	1.50233	0.201099	0.225239	0.827643	0.921925	0.764787	0.361196	0.0927634	-0.266414	NA	0.03286	0.0392	0.0286333	-0.0105667	0.949397	2.41e-08	FALSE	yes	0.999999	TRUE	no	NA	NA
ENST00000571581.5	ENSG00000185813.10	PCYT2	protein_coding	retained_intron	25.3425	23.2546	26.7344	0.733715	1.50233	0.201099	0.225239	1.36662	1.14146	1.51673	0.101563	0.13491	0.406982	NA	0.05418	0.049	0.0576333	0.00863333	0.959638	2.41e-08	NA	NA	0.998883	TRUE	NA	NA	NA
ENST00000572924.2	ENSG00000185813.10	PCYT2	protein_coding	retained_intron	25.3425	23.2546	26.7344	0.733715	1.50233	0.201099	0.225239	0.454843	0.499877	0.42482	0.0614886	0.164456	-0.229732	NA	0.01852	0.02145	0.0165667	-0.00488333	0.959638	2.41e-08	NA	NA	0.848389	TRUE	NA	NA	NA
ENST00000572995.5	ENSG00000185813.10	PCYT2	protein_coding	protein_coding	25.3425	23.2546	26.7344	0.733715	1.50233	0.201099	0.225239	0.861397	1.3984	0.503394	1.3984	0.503394	-1.45592	NA	0.03354	0.0583	0.0170333	-0.0412667	0.959638	2.41e-08	NA	no	0.999017	TRUE	no	NA	NA
ENST00000538936.6	ENSG00000185813.10	PCYT2	protein_coding	protein_coding	25.3425	23.2546	26.7344	0.733715	1.50233	0.201099	0.225239	5.68491	5.17559	6.02447	0.0270711	0.371076	0.21872	0.331557	0.22428	0.22275	0.2253	0.00255	0.962846	2.41e-08	FALSE	yes	1	TRUE	no	NA	NA
ENST00000571105.5	ENSG00000185813.10	PCYT2	protein_coding	protein_coding	25.3425	23.2546	26.7344	0.733715	1.50233	0.201099	0.225239	4.30558	4.06175	4.46814	0.352723	0.395902	0.137251	0.863912	0.17188	0.1753	0.1696	-0.0057	0.971786	2.41e-08	FALSE	yes	1	TRUE	no	NA	NA
ENST00000452475.5	ENSG00000106638.15	TBL2	protein_coding	processed_transcript	31.2888	31.134	31.3919	0.202183	0.568257	0.0118966	0.93285	1.68304	1.53013	1.78497	0.16399	0.565935	0.220909	NA	0.0538	0.04915	0.0569	0.00775	0.97465	2.41e-08	NA	NA	0.999684	TRUE	NA	0	TRUE
ENST00000637897.1	ENSG00000039650.11	PNKP	protein_coding	protein_coding	32.4334	32.9489	32.0898	3.15891	1.72957	-0.0381069	0.944361	1.20822	3.02054	0	1.44031	0	-8.24343	NA	0.0353	0.08825	0	-0.08825	2.45e-08	2.45e-08	FALSE	yes	0.0271167	FALSE	no	NA	NA
ENST00000600573.5	ENSG00000039650.11	PNKP	protein_coding	protein_coding	32.4334	32.9489	32.0898	3.15891	1.72957	-0.0381069	0.944361	0.761743	0.0356828	1.24578	0.0356828	0.327166	4.78079	NA	0.02362	0.0012	0.0385667	0.0373667	1.78e-05	2.45e-08	FALSE	yes	1	TRUE	no	NA	NA
ENST00000595792.1	ENSG00000039650.11	PNKP	protein_coding	retained_intron	32.4334	32.9489	32.0898	3.15891	1.72957	-0.0381069	0.944361	0.514872	0.303804	0.655584	0.0632188	0.226807	1.08476	NA	0.01578	0.0095	0.0199667	0.0104667	0.703229	2.45e-08	NA	NA	0.0199065	FALSE	NA	NA	NA
ENST00000625299.1	ENSG00000039650.11	PNKP	protein_coding	retained_intron	32.4334	32.9489	32.0898	3.15891	1.72957	-0.0381069	0.944361	2.19612	1.81073	2.45304	0.454783	0.653766	0.435926	NA	0.06672	0.0541	0.0751333	0.0210333	0.868953	2.45e-08	NA	NA	0.0837321	FALSE	NA	NA	NA
ENST00000596014.5	ENSG00000039650.11	PNKP	protein_coding	protein_coding	32.4334	32.9489	32.0898	3.15891	1.72957	-0.0381069	0.944361	10.8852	11.6292	10.3892	0.451988	0.496984	-0.162513	0.613104	0.3374	0.35755	0.323967	-0.0335833	0.948156	2.45e-08	FALSE	yes	1	TRUE	no	NA	NA
ENST00000600910.5	ENSG00000039650.11	PNKP	protein_coding	protein_coding	32.4334	32.9489	32.0898	3.15891	1.72957	-0.0381069	0.944361	0.801093	1.02177	0.653978	0.0894978	0.327058	-0.635907	NA	0.0243	0.03155	0.0194667	-0.0120833	0.954732	2.45e-08	FALSE	yes	1	TRUE	no	NA	NA
ENST00000593946.5	ENSG00000039650.11	PNKP	protein_coding	nonsense_mediated_decay	32.4334	32.9489	32.0898	3.15891	1.72957	-0.0381069	0.944361	1.50205	0.827912	1.95148	0.477058	1.21871	1.22707	NA	0.04956	0.02675	0.0647667	0.0380167	0.959638	2.45e-08	TRUE	yes	1	TRUE	no	NA	NA
ENST00000595081.5	ENSG00000039650.11	PNKP	protein_coding	retained_intron	32.4334	32.9489	32.0898	3.15891	1.72957	-0.0381069	0.944361	0.951457	0.713655	1.10999	0.713655	0.557255	0.630112	NA	0.03144	0.02395	0.0364333	0.0124833	0.959638	2.45e-08	NA	NA	0.0802088	FALSE	NA	NA	NA
ENST00000599454.5	ENSG00000039650.11	PNKP	protein_coding	retained_intron	32.4334	32.9489	32.0898	3.15891	1.72957	-0.0381069	0.944361	0.77126	0.761853	0.777532	0.761853	0.449142	0.0290111	NA	0.02224	0.0211	0.023	0.0019	0.959638	2.45e-08	NA	NA	0.0761488	FALSE	NA	NA	NA
ENST00000601816.3	ENSG00000039650.11	PNKP	protein_coding	retained_intron	32.4334	32.9489	32.0898	3.15891	1.72957	-0.0381069	0.944361	0.888771	0.847425	0.916335	0.205135	0.227434	0.111523	NA	0.02692	0.0254	0.0279333	0.00253333	0.968946	2.45e-08	NA	NA	0.0375858	FALSE	NA	NA	NA
ENST00000594661.5	ENSG00000039650.11	PNKP	protein_coding	retained_intron	32.4334	32.9489	32.0898	3.15891	1.72957	-0.0381069	0.944361	2.56001	2.68968	2.47356	0.518126	0.444776	-0.120376	0.924762	0.079	0.08085	0.0777667	-0.00308333	0.974417	2.45e-08	NA	NA	0.999996	TRUE	NA	NA	NA
ENST00000593706.3	ENSG00000039650.11	PNKP	protein_coding	retained_intron	32.4334	32.9489	32.0898	3.15891	1.72957	-0.0381069	0.944361	0.715724	0.726108	0.708802	0.206159	0.0955486	-0.0343244	NA	0.0221	0.02165	0.0224	0.00075	0.977115	2.45e-08	NA	NA	0.969301	TRUE	NA	NA	NA
ENST00000597965.2	ENSG00000039650.11	PNKP	protein_coding	protein_coding	32.4334	32.9489	32.0898	3.15891	1.72957	-0.0381069	0.944361	1.76522	1.7354	1.7851	0.201667	0.323944	0.0405073	NA	0.05444	0.05375	0.0549	0.00115	0.977706	2.45e-08	FALSE	no	0.0134623	FALSE	no	NA	NA
ENST00000626274.2	ENSG00000039650.11	PNKP	protein_coding	retained_intron	32.4334	32.9489	32.0898	3.15891	1.72957	-0.0381069	0.944361	2.27939	2.32581	2.24844	0.511089	0.312929	-0.0485958	NA	0.06954	0.06975	0.0694	-0.00035	0.99152	2.45e-08	NA	NA	0.134967	FALSE	NA	NA	NA
ENST00000596624.1	ENSG00000039650.11	PNKP	protein_coding	processed_transcript	32.4334	32.9489	32.0898	3.15891	1.72957	-0.0381069	0.944361	3.9079	3.99059	3.85278	0.891286	0.764678	-0.0505748	NA	0.11876	0.1196	0.1182	-0.0014	0.99277	2.45e-08	NA	NA	0.0370674	FALSE	NA	NA	NA
ENST00000537198.1	ENSG00000110237.3	ARHGEF17	protein_coding	retained_intron	11.4361	10.8045	11.8572	0.242387	1.05632	0.134009	0.540653	0.473447	0	0.789079	0	0.095231	6.32027	NA	0.03986	0	0.0664333	0.0664333	2.53e-08	2.53e-08	NA	NA	0.00937856	FALSE	NA	NA	NA
ENST00000536170.1	ENSG00000110237.3	ARHGEF17	protein_coding	processed_transcript	11.4361	10.8045	11.8572	0.242387	1.05632	0.134009	0.540653	0.510586	0.702754	0.382473	0.0210961	0.0860498	-0.860811	NA	0.04622	0.0651	0.0336333	-0.0314667	0.607433	2.53e-08	NA	NA	0.996714	TRUE	NA	NA	NA
ENST00000536481.1	ENSG00000110237.3	ARHGEF17	protein_coding	retained_intron	11.4361	10.8045	11.8572	0.242387	1.05632	0.134009	0.540653	1.07867	1.24595	0.967146	0.297807	0.301722	-0.362131	NA	0.09304	0.11475	0.0785667	-0.0361833	0.882199	2.53e-08	NA	NA	0.0755581	FALSE	NA	NA	NA
ENST00000263674.3	ENSG00000110237.3	ARHGEF17	protein_coding	protein_coding	11.4361	10.8045	11.8572	0.242387	1.05632	0.134009	0.540653	6.61269	6.44229	6.7263	0.337438	0.178311	0.0621445	0.809989	0.58392	0.59725	0.575033	-0.0222167	0.959638	2.53e-08	FALSE	yes	1	TRUE	no	NA	NA
ENST00000544519.1	ENSG00000110237.3	ARHGEF17	protein_coding	protein_coding	11.4361	10.8045	11.8572	0.242387	1.05632	0.134009	0.540653	0.377538	0.277036	0.444539	0.113915	0.135545	0.663172	NA	0.03306	0.0254	0.0381667	0.0127667	0.959638	2.53e-08	NA	no	0.195823	FALSE	no	NA	NA
ENST00000543530.1	ENSG00000110237.3	ARHGEF17	protein_coding	retained_intron	11.4361	10.8045	11.8572	0.242387	1.05632	0.134009	0.540653	2.38316	2.13646	2.54762	0.189199	0.705282	0.252846	NA	0.20386	0.19745	0.208133	0.0106833	0.971004	2.53e-08	NA	NA	0.999247	TRUE	NA	NA	NA
ENST00000565644.5	ENSG00000103257.8	SLC7A5	protein_coding	protein_coding	282.558	281.43	283.31	36.5139	24.3518	0.00960464	0.973582	102.602	112.355	96.1001	12.9529	8.2843	-0.22543	0.650896	0.36352	0.4	0.3392	-0.0608	3.98e-08	2.61e-08	FALSE	yes	0.998818	TRUE	no	NA	NA
ENST00000261622.4	ENSG00000103257.8	SLC7A5	protein_coding	protein_coding	282.558	281.43	283.31	36.5139	24.3518	0.00960464	0.973582	177.461	167.668	183.99	22.7859	16.291	0.134006	0.822819	0.62766	0.5953	0.649233	0.0539333	2.61e-08	2.61e-08	FALSE	yes	1	TRUE	no	NA	NA
ENST00000424458.5	ENSG00000244462.7	RBM12	protein_coding	protein_coding	61.1089	59.8602	61.9414	1.75885	0.881697	0.0492993	0.662828	21.7279	17.438	24.5878	1.18844	0.524358	0.495471	0.00336988	0.35456	0.291	0.396933	0.105933	2.68e-08	2.68e-08	FALSE	no	0.35736	NA	no	0	NA
ENST00000374104.7	ENSG00000244462.7	RBM12	protein_coding	protein_coding	61.1089	59.8602	61.9414	1.75885	0.881697	0.0492993	0.662828	29.7321	31.0562	28.8494	1.35395	0.913126	-0.106306	0.521373	0.48684	0.5186	0.465667	-0.0529333	0.074257	2.68e-08	FALSE	yes	1	TRUE	no	0	NA
ENST00000374114.7	ENSG00000244462.7	RBM12	protein_coding	protein_coding	61.1089	59.8602	61.9414	1.75885	0.881697	0.0492993	0.662828	7.37069	8.23135	6.79693	0.289381	0.285225	-0.275877	0.0446641	0.12106	0.1378	0.1099	-0.0279	0.497429	2.68e-08	FALSE	yes	1	TRUE	no	0	NA
ENST00000435161.1	ENSG00000244462.7	RBM12	protein_coding	protein_coding	61.1089	59.8602	61.9414	1.75885	0.881697	0.0492993	0.662828	1.34395	2.43363	0.617497	0.313053	0.617497	-1.96135	NA	0.02216	0.04085	0.0097	-0.03115	0.529245	2.68e-08	FALSE	no	0.107883	FALSE	no	0	NA
ENST00000596357.1	ENSG00000123815.11	COQ8B	protein_coding	protein_coding	18.9679	18.3364	19.3889	1.35145	0.85082	0.0804767	0.785231	0.38434	0.960851	0	0.0586565	0	-6.60118	NA	0.02116	0.0529	0	-0.0529	2.94e-08	2.94e-08	FALSE	no	0.154711	FALSE	no	NA	NA
ENST00000324464.7	ENSG00000123815.11	COQ8B	protein_coding	protein_coding	18.9679	18.3364	19.3889	1.35145	0.85082	0.0804767	0.785231	5.47094	4.18259	6.32983	0.899774	0.696279	0.596603	0.162893	0.2852	0.2257	0.324867	0.0991667	0.291537	2.94e-08	FALSE	yes	1	TRUE	no	NA	NA
ENST00000601967.5	ENSG00000123815.11	COQ8B	protein_coding	protein_coding	18.9679	18.3364	19.3889	1.35145	0.85082	0.0804767	0.785231	1.73015	2.14676	1.45242	0.432592	0.431199	-0.560514	NA	0.0923	0.1195	0.0741667	-0.0453333	0.830838	2.94e-08	FALSE	yes	0.254379	NA	no	NA	NA
ENST00000601304.5	ENSG00000123815.11	COQ8B	protein_coding	nonsense_mediated_decay	18.9679	18.3364	19.3889	1.35145	0.85082	0.0804767	0.785231	0.547012	0.621791	0.497159	0.0103036	0.158326	-0.31701	NA	0.029	0.03415	0.0255667	-0.00858333	0.944152	2.94e-08	TRUE	no	0.0697853	FALSE	no	NA	NA
ENST00000593724.1	ENSG00000123815.11	COQ8B	protein_coding	retained_intron	18.9679	18.3364	19.3889	1.35145	0.85082	0.0804767	0.785231	0.565228	0.409914	0.668771	0.05906	0.217774	0.692833	NA	0.02936	0.0227	0.0338	0.0111	0.9501	2.94e-08	NA	NA	0.326729	NA	NA	NA	NA
ENST00000243583.10	ENSG00000123815.11	COQ8B	protein_coding	protein_coding	18.9679	18.3364	19.3889	1.35145	0.85082	0.0804767	0.785231	5.0468	5.20075	4.94416	0.559464	0.829657	-0.0728522	0.950678	0.27058	0.2874	0.259367	-0.0280333	0.959638	2.94e-08	FALSE	yes	1	TRUE	no	NA	NA
ENST00000593723.1	ENSG00000123815.11	COQ8B	protein_coding	protein_coding	18.9679	18.3364	19.3889	1.35145	0.85082	0.0804767	0.785231	0.90846	0.739182	1.02131	0.45372	0.43449	0.461094	NA	0.04636	0.0387	0.0514667	0.0127667	0.959638	2.94e-08	FALSE	no	0.149199	FALSE	no	NA	NA
ENST00000596455.5	ENSG00000123815.11	COQ8B	protein_coding	retained_intron	18.9679	18.3364	19.3889	1.35145	0.85082	0.0804767	0.785231	1.53535	1.41169	1.61778	0.42277	0.185658	0.195298	NA	0.0808	0.0757	0.0842	0.0085	0.959638	2.94e-08	NA	NA	0.0569521	FALSE	NA	NA	NA
ENST00000601451.5	ENSG00000123815.11	COQ8B	protein_coding	retained_intron	18.9679	18.3364	19.3889	1.35145	0.85082	0.0804767	0.785231	0.454098	0.489938	0.430204	0.0413545	0.0711913	-0.183576	NA	0.02422	0.0267	0.0225667	-0.00413333	0.959638	2.94e-08	NA	NA	0.288971	NA	NA	NA	NA
ENST00000595254.5	ENSG00000123815.11	COQ8B	protein_coding	protein_coding	18.9679	18.3364	19.3889	1.35145	0.85082	0.0804767	0.785231	0.228628	0.219194	0.234917	0.219194	0.234917	0.0957239	NA	0.01298	0.0129	0.0130333	0.000133333	0.959698	2.94e-08	FALSE	yes	0.209002	FALSE	no	NA	NA
ENST00000594720.5	ENSG00000123815.11	COQ8B	protein_coding	protein_coding	18.9679	18.3364	19.3889	1.35145	0.85082	0.0804767	0.785231	1.93834	1.75261	2.06216	0.753489	0.587513	0.233426	NA	0.09974	0.09305	0.1042	0.01115	0.97164	2.94e-08	FALSE	no	0.179432	FALSE	no	NA	NA
ENST00000537006.1	ENSG00000171617.13	ENC1	protein_coding	protein_coding	11.1998	11.9835	10.6774	1.10701	0.604153	-0.16634	0.452022	0.532914	0	0.888191	0	0.134096	6.48895	NA	0.05034	0	0.0839	0.0839	3.05e-08	3.05e-08	FALSE	yes	1	TRUE	no	NA	NA
ENST00000302351.8	ENSG00000171617.13	ENC1	protein_coding	protein_coding	11.1998	11.9835	10.6774	1.10701	0.604153	-0.16634	0.452022	8.34374	9.21592	7.76229	0.183945	0.462348	-0.247352	0.202423	0.74592	0.77425	0.727033	-0.0472167	0.806312	3.05e-08	FALSE	yes	1	TRUE	no	NA	NA
ENST00000508331.1	ENSG00000171617.13	ENC1	protein_coding	protein_coding	11.1998	11.9835	10.6774	1.10701	0.604153	-0.16634	0.452022	0.116167	0.176707	0.0758063	0.0237808	0.0424655	-1.12162	NA	0.01016	0.01505	0.0069	-0.00815	0.91437	3.05e-08	FALSE	no	0.131506	FALSE	no	NA	NA
ENST00000618628.4	ENSG00000171617.13	ENC1	protein_coding	protein_coding	11.1998	11.9835	10.6774	1.10701	0.604153	-0.16634	0.452022	2.14583	2.43792	1.9511	0.79392	0.170352	-0.319893	0.689862	0.18892	0.19905	0.182167	-0.0168833	0.959638	3.05e-08	FALSE	yes	1	TRUE	no	NA	NA
ENST00000520158.5	ENSG00000044115.20	CTNNA1	protein_coding	protein_coding	317.151	317.641	316.824	22.8945	5.60804	-0.00371942	0.97934	31.9123	40.7512	26.0197	5.59565	0.459104	-0.647039	0.00362538	0.10036	0.1277	0.0821333	-0.0455667	3.13e-08	3.13e-08	FALSE	yes	0.314327	NA	no	NA	NA
ENST00000517534.5	ENSG00000044115.20	CTNNA1	protein_coding	retained_intron	317.151	317.641	316.824	22.8945	5.60804	-0.00371942	0.97934	30.4372	26.6604	32.9551	5.13804	0.510965	0.3057	0.603529	0.09576	0.0832	0.104133	0.0209333	0.35276	3.13e-08	NA	NA	0.492633	NA	NA	NA	NA
ENST00000521724.5	ENSG00000044115.20	CTNNA1	protein_coding	nonsense_mediated_decay	317.151	317.641	316.824	22.8945	5.60804	-0.00371942	0.97934	4.84421	4.1644	5.29742	1.13704	0.306636	0.34644	0.573187	0.01518	0.01295	0.0166667	0.00371667	0.697793	3.13e-08	TRUE	no	1	TRUE	no	NA	NA
ENST00000519489.1	ENSG00000044115.20	CTNNA1	protein_coding	retained_intron	317.151	317.641	316.824	22.8945	5.60804	-0.00371942	0.97934	28.6579	26.3339	30.2072	2.38564	3.99574	0.197901	0.822683	0.09008	0.0828	0.0949333	0.0121333	0.92301	3.13e-08	NA	NA	0.0623568	FALSE	NA	NA	NA
ENST00000522792.1	ENSG00000044115.20	CTNNA1	protein_coding	retained_intron	317.151	317.641	316.824	22.8945	5.60804	-0.00371942	0.97934	3.41063	3.66687	3.2398	0.278626	0.199474	-0.178125	0.75991	0.01078	0.01155	0.0102667	-0.00128333	0.930511	3.13e-08	NA	NA	0.229768	FALSE	NA	NA	NA
ENST00000521387.1	ENSG00000044115.20	CTNNA1	protein_coding	retained_intron	317.151	317.641	316.824	22.8945	5.60804	-0.00371942	0.97934	3.89347	3.60594	4.08516	2.04213	0.0940784	0.179551	0.933304	0.01212	0.01095	0.0129	0.00195	0.954577	3.13e-08	NA	NA	0.999957	TRUE	NA	NA	NA
ENST00000517904.1	ENSG00000044115.20	CTNNA1	protein_coding	retained_intron	317.151	317.641	316.824	22.8945	5.60804	-0.00371942	0.97934	3.68332	3.23942	3.97926	0.660066	0.793455	0.295938	NA	0.01176	0.0104	0.0126667	0.00226667	0.959638	3.13e-08	NA	NA	0.212881	FALSE	NA	NA	NA
ENST00000302763.11	ENSG00000044115.20	CTNNA1	protein_coding	protein_coding	317.151	317.641	316.824	22.8945	5.60804	-0.00371942	0.97934	203.347	203.808	203.039	6.0573	2.07581	-0.0054578	0.987455	0.64208	0.6436	0.641067	-0.00253333	0.978963	3.13e-08	FALSE	yes	1	TRUE	no	NA	NA
ENST00000560088.5	ENSG00000177082.12	WDR73	protein_coding	retained_intron	53.0746	52.3644	53.5481	0.634553	0.735738	0.0322432	0.824143	2.07202	3.59269	1.05824	0.12636	0.189544	-1.75384	NA	0.03926	0.0686	0.0197	-0.0489	3.14e-08	3.14e-08	NA	NA	0.156267	FALSE	NA	NA	NA
ENST00000559015.5	ENSG00000177082.12	WDR73	protein_coding	retained_intron	53.0746	52.3644	53.5481	0.634553	0.735738	0.0322432	0.824143	2.91835	2.45069	3.23013	0.686942	0.175005	0.396987	0.565445	0.0549	0.04665	0.0604	0.01375	0.819114	3.14e-08	NA	NA	0.968419	TRUE	NA	NA	NA
ENST00000560966.5	ENSG00000177082.12	WDR73	protein_coding	retained_intron	53.0746	52.3644	53.5481	0.634553	0.735738	0.0322432	0.824143	1.90773	1.69801	2.04754	0.0362106	0.0467738	0.268608	0.373577	0.03592	0.0324	0.0382667	0.00586667	0.909051	3.14e-08	NA	NA	0.0932547	FALSE	NA	NA	NA
ENST00000558521.5	ENSG00000177082.12	WDR73	protein_coding	nonsense_mediated_decay	53.0746	52.3644	53.5481	0.634553	0.735738	0.0322432	0.824143	4.28789	3.31375	4.93731	0.836346	1.19744	0.573834	0.614813	0.08038	0.0631	0.0919	0.0288	0.916572	3.14e-08	NA	no	0.2945	NA	no	NA	NA
ENST00000560252.5	ENSG00000177082.12	WDR73	protein_coding	retained_intron	53.0746	52.3644	53.5481	0.634553	0.735738	0.0322432	0.824143	3.39102	3.20182	3.51716	0.2747	0.0709111	0.135114	0.890084	0.06388	0.0612	0.0656667	0.00446667	0.959638	3.14e-08	NA	NA	0.566036	TRUE	NA	NA	NA
ENST00000561329.5	ENSG00000177082.12	WDR73	protein_coding	retained_intron	53.0746	52.3644	53.5481	0.634553	0.735738	0.0322432	0.824143	2.88897	3.11768	2.73651	0.711639	0.45845	-0.187494	0.907225	0.05432	0.0594	0.0509333	-0.00846667	0.959638	3.14e-08	NA	NA	0.998819	TRUE	NA	NA	NA
ENST00000398528.7	ENSG00000177082.12	WDR73	protein_coding	processed_transcript	53.0746	52.3644	53.5481	0.634553	0.735738	0.0322432	0.824143	27.117	26.1315	27.774	0.559252	0.930241	0.0879166	0.675331	0.51098	0.49925	0.5188	0.01955	0.960403	3.14e-08	NA	NA	0.104519	FALSE	NA	NA	NA
ENST00000434634.6	ENSG00000177082.12	WDR73	protein_coding	protein_coding	53.0746	52.3644	53.5481	0.634553	0.735738	0.0322432	0.824143	6.72387	6.64226	6.77828	0.0762916	0.569906	0.029201	0.954231	0.12688	0.1269	0.126867	-3.33e-05	0.977563	3.14e-08	FALSE	no	0.999999	TRUE	no	NA	NA
ENST00000541652.5	ENSG00000089053.12	ANAPC5	protein_coding	retained_intron	125.484	134.497	119.475	0.159892	1.51827	-0.17085	0.0607211	9.80037	17.2877	4.80883	2.84127	0.357566	-1.84383	2e-08	0.07556	0.12855	0.0402333	-0.0883167	3.15e-08	3.15e-08	NA	NA	0.99984	TRUE	NA	NA	NA
ENST00000261819.7	ENSG00000089053.12	ANAPC5	protein_coding	protein_coding	125.484	134.497	119.475	0.159892	1.51827	-0.17085	0.0607211	67.4891	69.7058	66.0113	1.69033	0.35135	-0.0785548	0.438796	0.53888	0.51825	0.552633	0.0343833	0.0692697	3.15e-08	FALSE	yes	1	TRUE	no	NA	NA
ENST00000539612.5	ENSG00000089053.12	ANAPC5	protein_coding	retained_intron	125.484	134.497	119.475	0.159892	1.51827	-0.17085	0.0607211	1.46373	0.679144	1.98679	0.218023	0.536734	1.5348	NA	0.01194	0.00505	0.0165333	0.0114833	0.20615	3.15e-08	NA	NA	0.00667234	FALSE	NA	NA	NA
ENST00000441917.6	ENSG00000089053.12	ANAPC5	protein_coding	protein_coding	125.484	134.497	119.475	0.159892	1.51827	-0.17085	0.0607211	21.6079	21.3834	21.7576	2.72799	0.623157	0.0250216	0.964703	0.17282	0.159	0.182033	0.0230333	0.71256	3.15e-08	FALSE	yes	1	TRUE	no	NA	NA
ENST00000535641.5	ENSG00000089053.12	ANAPC5	protein_coding	retained_intron	125.484	134.497	119.475	0.159892	1.51827	-0.17085	0.0607211	1.92003	1.85501	1.96339	0.000496334	0.136734	0.0814909	0.923725	0.01536	0.0138	0.0164	0.0026	0.865002	3.15e-08	NA	NA	0.999953	TRUE	NA	NA	NA
ENST00000534976.5	ENSG00000089053.12	ANAPC5	protein_coding	retained_intron	125.484	134.497	119.475	0.159892	1.51827	-0.17085	0.0607211	4.16029	3.98321	4.27834	0.56786	0.427974	0.102869	0.888688	0.0333	0.02965	0.0357333	0.00608333	0.87521	3.15e-08	NA	NA	0.999676	TRUE	NA	NA	NA
ENST00000539079.5	ENSG00000089053.12	ANAPC5	protein_coding	nonsense_mediated_decay	125.484	134.497	119.475	0.159892	1.51827	-0.17085	0.0607211	12.364	12.9425	11.9783	0.24961	0.670949	-0.111604	0.788724	0.09876	0.09625	0.100433	0.00418333	0.959638	3.15e-08	NA	no	0.999225	TRUE	no	NA	NA
ENST00000422342.2	ENSG00000089053.12	ANAPC5	protein_coding	retained_intron	125.484	134.497	119.475	0.159892	1.51827	-0.17085	0.0607211	2.57188	2.83081	2.39927	0.0340065	0.160876	-0.237708	0.804305	0.02048	0.02105	0.0201	-0.00095	0.960166	3.15e-08	NA	NA	0.482559	NA	NA	NA	NA
ENST00000506745.5	ENSG00000163138.18	PACRGL	protein_coding	protein_coding	10.1544	10.8386	9.69825	0.202698	0.374505	-0.160222	0.738828	0.176643	0.441608	0	0.221072	0	-5.497	NA	0.01614	0.04035	0	-0.04035	0.0395093	3.3e-08	FALSE	no	0.153797	FALSE	no	NA	NA
ENST00000295290.12	ENSG00000163138.18	PACRGL	protein_coding	protein_coding	10.1544	10.8386	9.69825	0.202698	0.374505	-0.160222	0.738828	0.450298	0	0.750496	0	0.115128	6.24887	NA	0.04604	0	0.0767333	0.0767333	3.3e-08	3.3e-08	FALSE	yes	0.995353	TRUE	no	NA	NA
ENST00000360916.9	ENSG00000163138.18	PACRGL	protein_coding	protein_coding	10.1544	10.8386	9.69825	0.202698	0.374505	-0.160222	0.738828	1.32425	2.47287	0.558499	0.454248	0.226146	-2.12678	0.0111486	0.12736	0.229	0.0596	-0.1694	0.0836299	3.3e-08	FALSE	yes	0.988995	TRUE	no	NA	NA
ENST00000444671.6	ENSG00000163138.18	PACRGL	protein_coding	protein_coding	10.1544	10.8386	9.69825	0.202698	0.374505	-0.160222	0.738828	1.05943	0.839364	1.20615	0.0374129	0.147853	0.517863	NA	0.10534	0.0774	0.123967	0.0465667	0.47674	3.3e-08	FALSE	no	0.353707	NA	no	NA	NA
ENST00000513861.5	ENSG00000163138.18	PACRGL	protein_coding	protein_coding	10.1544	10.8386	9.69825	0.202698	0.374505	-0.160222	0.738828	0.979009	0.551962	1.26371	0.120913	0.326473	1.18049	NA	0.10032	0.0507	0.1334	0.0827	0.478996	3.3e-08	FALSE	yes	0.190187	FALSE	no	NA	NA
ENST00000513590.5	ENSG00000163138.18	PACRGL	protein_coding	protein_coding	10.1544	10.8386	9.69825	0.202698	0.374505	-0.160222	0.738828	0.208529	0	0.347549	0	0.213097	5.16007	NA	0.02156	0	0.0359333	0.0359333	0.606176	3.3e-08	FALSE	yes	0.247143	FALSE	no	NA	NA
ENST00000467997.6	ENSG00000163138.18	PACRGL	protein_coding	nonsense_mediated_decay	10.1544	10.8386	9.69825	0.202698	0.374505	-0.160222	0.738828	0.247929	0	0.413215	0	0.232081	5.40332	NA	0.0256	0	0.0426667	0.0426667	0.613549	3.3e-08	TRUE	yes	0.997526	TRUE	no	NA	NA
ENST00000506552.1	ENSG00000163138.18	PACRGL	protein_coding	retained_intron	10.1544	10.8386	9.69825	0.202698	0.374505	-0.160222	0.738828	0.298766	0	0.497943	0	0.317038	5.6666	NA	0.03054	0	0.0509	0.0509	0.620612	3.3e-08	NA	NA	0.131137	FALSE	NA	NA	NA
ENST00000508952.5	ENSG00000163138.18	PACRGL	protein_coding	nonsense_mediated_decay	10.1544	10.8386	9.69825	0.202698	0.374505	-0.160222	0.738828	1.40822	1.80836	1.14145	0.136369	0.239118	-0.659182	NA	0.1381	0.1671	0.118767	-0.0483333	0.793561	3.3e-08	TRUE	no	0.0748063	FALSE	no	NA	NA
ENST00000506702.5	ENSG00000163138.18	PACRGL	protein_coding	nonsense_mediated_decay	10.1544	10.8386	9.69825	0.202698	0.374505	-0.160222	0.738828	0.421611	0.626144	0.285257	0.5259	0.285257	-1.10738	NA	0.03984	0.05685	0.0285	-0.02835	0.91788	3.3e-08	TRUE	yes	0.998476	TRUE	no	NA	NA
ENST00000513459.5	ENSG00000163138.18	PACRGL	protein_coding	protein_coding	10.1544	10.8386	9.69825	0.202698	0.374505	-0.160222	0.738828	0.35353	0.423414	0.306941	0.137952	0.29218	-0.451529	NA	0.03398	0.03935	0.0304	-0.00895	0.918968	3.3e-08	FALSE	yes	0.757177	TRUE	no	NA	NA
ENST00000506951.5	ENSG00000163138.18	PACRGL	protein_coding	nonsense_mediated_decay	10.1544	10.8386	9.69825	0.202698	0.374505	-0.160222	0.738828	0.264032	0.373633	0.190964	0.0473909	0.11317	-0.932793	NA	0.02516	0.03455	0.0189	-0.01565	0.926739	3.3e-08	TRUE	no	0.249127	FALSE	no	NA	NA
ENST00000511089.1	ENSG00000163138.18	PACRGL	protein_coding	protein_coding	10.1544	10.8386	9.69825	0.202698	0.374505	-0.160222	0.738828	0.325952	0.429792	0.256726	0.0187918	0.138773	-0.721462	NA	0.03228	0.0396	0.0274	-0.0122	0.955406	3.3e-08	FALSE	yes	0.199802	FALSE	no	NA	NA
ENST00000502938.5	ENSG00000163138.18	PACRGL	protein_coding	protein_coding	10.1544	10.8386	9.69825	0.202698	0.374505	-0.160222	0.738828	0.228426	0.208999	0.241377	0.208999	0.103157	0.198929	NA	0.02308	0.01895	0.0258333	0.00688333	0.959638	3.3e-08	FALSE	no	0.198688	FALSE	no	NA	NA
ENST00000507634.5	ENSG00000163138.18	PACRGL	protein_coding	protein_coding	10.1544	10.8386	9.69825	0.202698	0.374505	-0.160222	0.738828	0.293691	0.350854	0.255582	0.350854	0.112232	-0.442256	NA	0.02958	0.033	0.0273	-0.0057	0.959638	3.3e-08	TRUE	yes	0.998053	TRUE	no	NA	NA
ENST00000503747.5	ENSG00000163138.18	PACRGL	protein_coding	nonsense_mediated_decay	10.1544	10.8386	9.69825	0.202698	0.374505	-0.160222	0.738828	0.158127	0.214097	0.120815	0.214097	0.120815	-0.776598	NA	0.015	0.0194	0.0120667	-0.00733333	0.959698	3.3e-08	TRUE	no	0.115521	FALSE	no	NA	NA
ENST00000506457.1	ENSG00000163138.18	PACRGL	protein_coding	protein_coding	10.1544	10.8386	9.69825	0.202698	0.374505	-0.160222	0.738828	0.401724	0.57139	0.288613	0.57139	0.288613	-0.961231	NA	0.03878	0.0537	0.0288333	-0.0248667	0.959768	3.3e-08	NA	no	0.00462355	FALSE	no	NA	NA
ENST00000471979.6	ENSG00000163138.18	PACRGL	protein_coding	nonsense_mediated_decay	10.1544	10.8386	9.69825	0.202698	0.374505	-0.160222	0.738828	0.165784	0.150366	0.176063	0.150366	0.109597	0.214424	NA	0.0171	0.01415	0.0190667	0.00491667	0.960403	3.3e-08	TRUE	yes	0.999028	TRUE	no	NA	NA
ENST00000511160.5	ENSG00000163138.18	PACRGL	protein_coding	protein_coding	10.1544	10.8386	9.69825	0.202698	0.374505	-0.160222	0.738828	0.12321	0.0764631	0.154374	0.0764631	0.154374	0.926828	NA	0.01204	0.00695	0.0154333	0.00848333	0.978718	3.3e-08	FALSE	no	0.144339	FALSE	no	NA	NA
ENST00000503585.5	ENSG00000163138.18	PACRGL	protein_coding	protein_coding	10.1544	10.8386	9.69825	0.202698	0.374505	-0.160222	0.738828	0.732119	0.618998	0.807532	0.278169	0.403786	0.37822	NA	0.07076	0.05665	0.0801667	0.0235167	0.998881	3.3e-08	FALSE	yes	0.999607	TRUE	no	NA	NA
ENST00000378279.3	ENSG00000205002.3	AARD	protein_coding	protein_coding	2.91772	2.66786	3.08429	0.108895	0.484698	0.208526	0.759222	2.53913	2.66786	2.4533	0.108895	0.390529	-0.120485	0.903523	0.8773	1	0.7955	-0.2045	3.45e-08	3.45e-08	FALSE	no	0.845142	TRUE	no	0	TRUE
ENST00000313269.5	ENSG00000178719.16	GRINA	protein_coding	protein_coding	388.583	337.968	422.326	10.3088	3.88271	0.321461	8.19e-07	15.3807	9.43053	19.3475	0.4587	0.599454	1.03596	3.34e-17	0.03868	0.028	0.0458	0.0178	3.45e-08	3.45e-08	FALSE	yes	1	TRUE	no	NA	NA
ENST00000523536.1	ENSG00000205002.3	AARD	protein_coding	processed_transcript	2.91772	2.66786	3.08429	0.108895	0.484698	0.208526	0.759222	0.378588	0	0.630981	0	0.100006	6.00221	NA	0.1227	0	0.2045	0.2045	5.83e-07	3.45e-08	NA	NA	0.0386505	FALSE	NA	0	TRUE
ENST00000534791.5	ENSG00000178719.16	GRINA	protein_coding	protein_coding	388.583	337.968	422.326	10.3088	3.88271	0.321461	8.19e-07	16.6694	17.0303	16.4287	3.38933	2.57428	-0.0518556	0.966863	0.0434	0.0501	0.0389333	-0.0111667	0.856005	3.45e-08	NA	no	0.253755	NA	no	NA	NA
ENST00000525513.1	ENSG00000178719.16	GRINA	protein_coding	retained_intron	388.583	337.968	422.326	10.3088	3.88271	0.321461	8.19e-07	9.89871	8.0563	11.127	1.26638	0.554252	0.465379	0.288017	0.0253	0.02375	0.0263333	0.00258333	0.919326	3.45e-08	NA	NA	0.334421	NA	NA	NA	NA
ENST00000527194.5	ENSG00000178719.16	GRINA	protein_coding	protein_coding	388.583	337.968	422.326	10.3088	3.88271	0.321461	8.19e-07	43.2676	41.083	44.724	2.39272	5.79503	0.122477	0.828107	0.11218	0.12145	0.106	-0.01545	0.925676	3.45e-08	NA	no	0.94224	TRUE	no	NA	NA
ENST00000395068.8	ENSG00000178719.16	GRINA	protein_coding	protein_coding	388.583	337.968	422.326	10.3088	3.88271	0.321461	8.19e-07	224.663	193.402	245.505	4.05869	5.09342	0.344134	4.17e-10	0.57786	0.57245	0.581467	0.00901667	0.959638	3.45e-08	FALSE	yes	1	TRUE	no	NA	NA
ENST00000533377.1	ENSG00000178719.16	GRINA	protein_coding	retained_intron	388.583	337.968	422.326	10.3088	3.88271	0.321461	8.19e-07	66.7576	59.2291	71.7766	3.04242	8.52904	0.277165	0.50621	0.17212	0.17565	0.169767	-0.00588333	0.966276	3.45e-08	NA	NA	0.970026	TRUE	NA	NA	NA
ENST00000533044.5	ENSG00000178719.16	GRINA	protein_coding	protein_coding	388.583	337.968	422.326	10.3088	3.88271	0.321461	8.19e-07	9.79257	8.59859	10.5885	2.88935	2.53705	0.300017	0.853874	0.02508	0.0252	0.025	-0.0002	0.993615	3.45e-08	NA	no	0.0770995	FALSE	no	NA	NA
ENST00000489103.5	ENSG00000127124.14	HIVEP3	protein_coding	processed_transcript	3.6361	3.92437	3.44392	0.245418	0.128462	-0.187898	0.638038	0.817852	1.96026	0.0562447	0.10476	0.0562447	-4.89444	NA	0.21042	0.50315	0.0152667	-0.487883	3.47e-08	3.47e-08	NA	NA	0.0360069	FALSE	NA	0	FALSE
ENST00000484420.1	ENSG00000116198.12	CEP104	protein_coding	retained_intron	28.8641	27.8945	29.5105	1.64064	1.16509	0.0812201	0.662195	1.10671	0	1.84451	0	0.558282	7.53489	NA	0.03706	0	0.0617667	0.0617667	3.47e-08	3.47e-08	NA	NA	0.145059	FALSE	NA	NA	NA
ENST00000479350.1	ENSG00000127124.14	HIVEP3	protein_coding	processed_transcript	3.6361	3.92437	3.44392	0.245418	0.128462	-0.187898	0.638038	0.152673	0	0.254456	0	0.0268408	4.72495	NA	0.04416	0	0.0736	0.0736	0.00334732	3.47e-08	NA	NA	0.0537739	FALSE	NA	0	FALSE
ENST00000491442.5	ENSG00000127124.14	HIVEP3	protein_coding	processed_transcript	3.6361	3.92437	3.44392	0.245418	0.128462	-0.187898	0.638038	2.06241	1.31147	2.56303	0.27896	0.0958112	0.961322	0.0625159	0.57936	0.33105	0.7449	0.41385	1.25e-06	3.47e-08	NA	NA	0.0375584	FALSE	NA	0	FALSE
ENST00000494653.5	ENSG00000116198.12	CEP104	protein_coding	retained_intron	28.8641	27.8945	29.5105	1.64064	1.16509	0.0812201	0.662195	6.61704	6.91719	6.41695	0.31112	0.659238	-0.108136	0.874488	0.22914	0.24815	0.216467	-0.0316833	0.767173	3.47e-08	NA	NA	1	TRUE	NA	NA	NA
ENST00000461667.1	ENSG00000116198.12	CEP104	protein_coding	protein_coding	28.8641	27.8945	29.5105	1.64064	1.16509	0.0812201	0.662195	1.34592	1.08439	1.52027	0.322534	0.224648	0.483665	NA	0.04668	0.0383	0.0522667	0.0139667	0.946299	3.47e-08	FALSE	no	0.0799913	FALSE	no	NA	NA
ENST00000443466.1	ENSG00000116198.12	CEP104	protein_coding	protein_coding	28.8641	27.8945	29.5105	1.64064	1.16509	0.0812201	0.662195	1.27005	1.42581	1.16621	0.0524727	0.353403	-0.287718	NA	0.0445	0.0512	0.0400333	-0.0111667	0.954732	3.47e-08	FALSE	no	0.0788027	FALSE	no	NA	NA
ENST00000378223.3	ENSG00000116198.12	CEP104	protein_coding	protein_coding	28.8641	27.8945	29.5105	1.64064	1.16509	0.0812201	0.662195	0.69531	0.737498	0.667184	0.0544282	0.305868	-0.142523	NA	0.02478	0.02665	0.0235333	-0.00311667	0.959638	3.47e-08	FALSE	no	0.999796	TRUE	no	NA	NA
ENST00000438539.5	ENSG00000116198.12	CEP104	protein_coding	protein_coding	28.8641	27.8945	29.5105	1.64064	1.16509	0.0812201	0.662195	6.80534	6.7376	6.8505	0.592656	0.201269	0.0239379	0.989227	0.23644	0.24115	0.2333	-0.00785	0.959638	3.47e-08	NA	no	0.779368	TRUE	no	NA	NA
ENST00000494951.1	ENSG00000116198.12	CEP104	protein_coding	retained_intron	28.8641	27.8945	29.5105	1.64064	1.16509	0.0812201	0.662195	0.436483	0.356828	0.489587	0.356828	0.489587	0.445632	NA	0.01454	0.0121	0.0161667	0.00406667	0.959638	3.47e-08	NA	NA	0.0863195	FALSE	NA	NA	NA
ENST00000495701.1	ENSG00000116198.12	CEP104	protein_coding	retained_intron	28.8641	27.8945	29.5105	1.64064	1.16509	0.0812201	0.662195	3.75932	3.8344	3.70926	0.365967	0.800089	-0.0477452	NA	0.12918	0.13715	0.123867	-0.0132833	0.959638	3.47e-08	NA	NA	0.868317	TRUE	NA	NA	NA
ENST00000460604.1	ENSG00000127124.14	HIVEP3	protein_coding	processed_transcript	3.6361	3.92437	3.44392	0.245418	0.128462	-0.187898	0.638038	0.0420335	0.0304999	0.0497226	0.0204755	0.0400785	0.560359	NA	0.01122	0.00745	0.0137333	0.00628333	0.959638	3.47e-08	NA	NA	1	TRUE	NA	0	FALSE
ENST00000378230.7	ENSG00000116198.12	CEP104	protein_coding	protein_coding	28.8641	27.8945	29.5105	1.64064	1.16509	0.0812201	0.662195	6.72871	6.5527	6.84605	0.354097	0.187209	0.0630864	0.787983	0.23412	0.2365	0.232533	-0.00396667	0.974712	3.47e-08	FALSE	no	1	TRUE	no	NA	NA
ENST00000372584.5	ENSG00000127124.14	HIVEP3	protein_coding	protein_coding	3.6361	3.92437	3.44392	0.245418	0.128462	-0.187898	0.638038	0.090448	0.101268	0.0832347	0.0210729	0.0424067	-0.255099	NA	0.0246	0.02555	0.0239667	-0.00158333	0.9827	3.47e-08	FALSE	yes	1	TRUE	no	0	FALSE
ENST00000372583.5	ENSG00000127124.14	HIVEP3	protein_coding	protein_coding	3.6361	3.92437	3.44392	0.245418	0.128462	-0.187898	0.638038	0.470685	0.520865	0.437231	0.0296696	0.0566431	-0.247323	0.7663	0.1302	0.13275	0.1285	-0.00425	0.986651	3.47e-08	FALSE	yes	1	TRUE	no	0	FALSE
ENST00000463461.5	ENSG00000134258.16	VTCN1	protein_coding	processed_transcript	22.6946	20.1301	24.4043	0.840965	1.9608	0.277659	0.117453	0.240253	0.600633	0	0.101074	0	-5.93223	NA	0.01188	0.0297	0	-0.0297	6.22e-06	3.52e-08	NA	NA	0.059266	FALSE	NA	NA	NA
ENST00000430871.3	ENSG00000134258.16	VTCN1	protein_coding	protein_coding	22.6946	20.1301	24.4043	0.840965	1.9608	0.277659	0.117453	0.691773	0	1.15295	0	0.267992	6.86165	NA	0.02782	0	0.0463667	0.0463667	3.52e-08	3.52e-08	FALSE	no	0.258947	NA	no	NA	NA
ENST00000328189.7	ENSG00000134258.16	VTCN1	protein_coding	protein_coding	22.6946	20.1301	24.4043	0.840965	1.9608	0.277659	0.117453	0.911459	0.97384	0.869873	0.199014	0.469459	-0.161128	NA	0.04124	0.04805	0.0367	-0.01135	0.959638	3.52e-08	TRUE	no	0.956764	TRUE	no	NA	NA
ENST00000369458.7	ENSG00000134258.16	VTCN1	protein_coding	protein_coding	22.6946	20.1301	24.4043	0.840965	1.9608	0.277659	0.117453	20.7195	18.5556	22.1621	0.540877	1.73404	0.256113	0.269512	0.91406	0.92225	0.9086	-0.01365	0.959638	3.52e-08	TRUE	yes	0.999987	TRUE	no	NA	NA
ENST00000370470.5	ENSG00000102081.13	FMR1	protein_coding	protein_coding	48.2192	48.1903	48.2384	4.11696	0.982663	0.00143997	0.96342	0.670666	0	1.11778	0	0.236298	6.81734	NA	0.01384	0	0.0230667	0.0230667	3.54e-08	3.54e-08	FALSE	yes	1	TRUE	no	NA	NA
ENST00000370475.8	ENSG00000102081.13	FMR1	protein_coding	protein_coding	48.2192	48.1903	48.2384	4.11696	0.982663	0.00143997	0.96342	10.1971	11.7776	9.14342	0.0690985	0.623747	-0.364885	0.0370615	0.21262	0.2463	0.190167	-0.0561333	0.450594	3.54e-08	FALSE	yes	1	TRUE	no	NA	NA
ENST00000218200.12	ENSG00000102081.13	FMR1	protein_coding	protein_coding	48.2192	48.1903	48.2384	4.11696	0.982663	0.00143997	0.96342	16.7264	15.3206	17.6636	1.24638	0.624839	0.205177	0.269595	0.3488	0.3225	0.366333	0.0438333	0.90782	3.54e-08	FALSE	yes	1	TRUE	no	NA	NA
ENST00000492846.1	ENSG00000102081.13	FMR1	protein_coding	retained_intron	48.2192	48.1903	48.2384	4.11696	0.982663	0.00143997	0.96342	1.78044	1.93495	1.67744	0.110028	0.184383	-0.204892	NA	0.0369	0.04025	0.0346667	-0.00558333	0.93159	3.54e-08	NA	NA	0.0175496	FALSE	NA	NA	NA
ENST00000440235.6	ENSG00000102081.13	FMR1	protein_coding	protein_coding	48.2192	48.1903	48.2384	4.11696	0.982663	0.00143997	0.96342	4.67665	5.07766	4.40931	1.44821	0.199045	-0.203183	0.790273	0.09624	0.1036	0.0913333	-0.0122667	0.959638	3.54e-08	FALSE	yes	1	TRUE	no	NA	NA
ENST00000463120.2	ENSG00000102081.13	FMR1	protein_coding	protein_coding	48.2192	48.1903	48.2384	4.11696	0.982663	0.00143997	0.96342	3.67405	3.37656	3.87238	2.37744	0.873322	0.197123	NA	0.07442	0.06635	0.0798	0.01345	0.959638	3.54e-08	FALSE	yes	0.631643	TRUE	no	NA	NA
ENST00000478848.1	ENSG00000102081.13	FMR1	protein_coding	retained_intron	48.2192	48.1903	48.2384	4.11696	0.982663	0.00143997	0.96342	1.35633	1.45817	1.28845	0.306124	0.155876	-0.177231	NA	0.02806	0.0299	0.0268333	-0.00306667	0.959638	3.54e-08	NA	NA	0.0786847	FALSE	NA	NA	NA
ENST00000439526.6	ENSG00000102081.13	FMR1	protein_coding	protein_coding	48.2192	48.1903	48.2384	4.11696	0.982663	0.00143997	0.96342	2.3537	2.32861	2.37043	0.778954	0.453306	0.025576	0.981591	0.04824	0.0473	0.0488667	0.00156667	0.980391	3.54e-08	FALSE	yes	1	TRUE	no	NA	NA
ENST00000370477.5	ENSG00000102081.13	FMR1	protein_coding	protein_coding	48.2192	48.1903	48.2384	4.11696	0.982663	0.00143997	0.96342	4.92356	4.82744	4.98764	0.0458074	0.197448	0.047003	0.922856	0.10254	0.101	0.103567	0.00256667	0.985368	3.54e-08	FALSE	yes	1	TRUE	no	NA	NA
ENST00000420411.7	ENSG00000236017.8	ASMTL-AS1	antisense_RNA	antisense_RNA	1.84334	1.30686	2.20099	0.266965	0.199478	0.747587	NA	0.618267	0	1.03045	0	0.174439	6.70106	NA	0.27684	0	0.4614	0.4614	3.61e-08	3.61e-08	NA	NA	0.619299	TRUE	NA	1	TRUE
ENST00000425740.7	ENSG00000236017.8	ASMTL-AS1	antisense_RNA	antisense_RNA	1.84334	1.30686	2.20099	0.266965	0.199478	0.747587	NA	0.283699	0.578365	0.087255	0.343878	0.087255	-2.59687	NA	0.19136	0.40575	0.0484333	-0.357317	0.431664	3.61e-08	NA	NA	0.193403	FALSE	NA	1	TRUE
ENST00000419737.7	ENSG00000236017.8	ASMTL-AS1	antisense_RNA	antisense_RNA	1.84334	1.30686	2.20099	0.266965	0.199478	0.747587	NA	0.32367	0.441182	0.245329	0.170523	0.18893	-0.821353	NA	0.21322	0.3801	0.101967	-0.278133	0.678729	3.61e-08	NA	NA	0.0441178	FALSE	NA	1	TRUE
ENST00000443929.6	ENSG00000236017.8	ASMTL-AS1	antisense_RNA	antisense_RNA	1.84334	1.30686	2.20099	0.266965	0.199478	0.747587	NA	0.525478	0.287317	0.684252	0.0936101	0.0953795	1.22346	NA	0.27122	0.21415	0.309267	0.0951167	0.766147	3.61e-08	NA	NA	0.0679586	FALSE	NA	0	TRUE
ENST00000602357.6	ENSG00000236017.8	ASMTL-AS1	antisense_RNA	antisense_RNA	1.84334	1.30686	2.20099	0.266965	0.199478	0.747587	NA	0.0922259	0	0.15371	0	0.0932951	4.03307	NA	0.04738	0	0.0789667	0.0789667	0.804273	3.61e-08	NA	NA	0.0719101	FALSE	NA	0	TRUE
ENST00000343067.8	ENSG00000159023.19	EPB41	protein_coding	protein_coding	28.5487	28.5928	28.5193	2.32889	1.52412	-0.00370992	0.995371	0.514622	1.2667	0.0132341	0.364509	0.0132341	-5.78004	0.00611759	0.01772	0.0436	0.000466667	-0.0431333	4.19e-08	4.19e-08	FALSE	yes	1	TRUE	no	NA	NA
ENST00000379980.8	ENSG00000133026.12	MYH10	protein_coding	protein_coding	23.8661	23.9374	23.8186	2.30475	0.958274	-0.00717116	0.996796	0.362423	0.906058	0	0.15423	0	-6.51737	1.75e-11	0.01504	0.0376	0	-0.0376	4.19e-08	4.19e-08	FALSE	yes	1	TRUE	no	NA	NA
ENST00000373798.5	ENSG00000159023.19	EPB41	protein_coding	protein_coding	28.5487	28.5928	28.5193	2.32889	1.52412	-0.00370992	0.995371	0.94401	0.152926	1.4714	0.152926	0.265766	3.18467	0.328857	0.0334	0.00495	0.0523667	0.0474167	0.0330402	4.19e-08	FALSE	yes	1	TRUE	no	NA	NA
ENST00000360416.7	ENSG00000133026.12	MYH10	protein_coding	protein_coding	23.8661	23.9374	23.8186	2.30475	0.958274	-0.00717116	0.996796	0.444799	0.277548	0.5563	0.0532565	0.121466	0.977762	0.20409	0.0186	0.0119	0.0230667	0.0111667	0.551941	4.19e-08	FALSE	yes	1	TRUE	no	NA	NA
ENST00000488277.1	ENSG00000159023.19	EPB41	protein_coding	processed_transcript	28.5487	28.5928	28.5193	2.32889	1.52412	-0.00370992	0.995371	2.01403	1.24996	2.52341	0.177351	1.13946	1.0077	NA	0.0687	0.0435	0.0855	0.042	0.884198	4.19e-08	NA	NA	0.0228695	FALSE	NA	NA	NA
ENST00000469865.1	ENSG00000133026.12	MYH10	protein_coding	retained_intron	23.8661	23.9374	23.8186	2.30475	0.958274	-0.00717116	0.996796	0.271571	0.186817	0.328074	0.0236954	0.0848694	0.780487	NA	0.01166	0.00795	0.0141333	0.00618333	0.887164	4.19e-08	NA	NA	0.123765	FALSE	NA	NA	NA
ENST00000460378.1	ENSG00000159023.19	EPB41	protein_coding	processed_transcript	28.5487	28.5928	28.5193	2.32889	1.52412	-0.00370992	0.995371	1.87279	2.05857	1.74893	0.163959	0.147999	-0.233933	0.622214	0.06606	0.072	0.0621	-0.0099	0.925431	4.19e-08	NA	NA	0.328787	NA	NA	NA	NA
ENST00000472728.1	ENSG00000133026.12	MYH10	protein_coding	retained_intron	23.8661	23.9374	23.8186	2.30475	0.958274	-0.00717116	0.996796	1.11139	0.922654	1.23722	0.922654	0.661544	0.419303	NA	0.04396	0.03515	0.0498333	0.0146833	0.959638	4.19e-08	NA	NA	0.105666	FALSE	NA	NA	NA
ENST00000476737.1	ENSG00000133026.12	MYH10	protein_coding	retained_intron	23.8661	23.9374	23.8186	2.30475	0.958274	-0.00717116	0.996796	1.07504	1.39683	0.860524	0.387514	0.442516	-0.692489	NA	0.04638	0.0605	0.0369667	-0.0235333	0.959638	4.19e-08	NA	NA	0.0925303	FALSE	NA	NA	NA
ENST00000584124.1	ENSG00000133026.12	MYH10	protein_coding	retained_intron	23.8661	23.9374	23.8186	2.30475	0.958274	-0.00717116	0.996796	0.596862	0.591314	0.60056	0.591314	0.60056	0.0220124	NA	0.02338	0.02255	0.0239333	0.00138333	0.959638	4.19e-08	NA	NA	0.0305327	FALSE	NA	NA	NA
ENST00000347529.7	ENSG00000159023.19	EPB41	protein_coding	protein_coding	28.5487	28.5928	28.5193	2.32889	1.52412	-0.00370992	0.995371	0.617761	0.662486	0.587944	0.0409742	0.139054	-0.169493	NA	0.02158	0.0232	0.0205	-0.0027	0.959638	4.19e-08	FALSE	yes	1	TRUE	no	NA	NA
ENST00000356093.6	ENSG00000159023.19	EPB41	protein_coding	protein_coding	28.5487	28.5928	28.5193	2.32889	1.52412	-0.00370992	0.995371	11.4021	11.795	11.1402	0.264352	0.379497	-0.0823245	0.686969	0.40146	0.41605	0.391733	-0.0243167	0.959638	4.19e-08	FALSE	yes	1	TRUE	no	NA	NA
ENST00000488329.1	ENSG00000133026.12	MYH10	protein_coding	retained_intron	23.8661	23.9374	23.8186	2.30475	0.958274	-0.00717116	0.996796	1.21052	1.15789	1.24561	0.646642	0.29637	0.104494	NA	0.05	0.0462	0.0525333	0.00633333	0.960403	4.19e-08	NA	NA	0.0672019	FALSE	NA	NA	NA
ENST00000269243.8	ENSG00000133026.12	MYH10	protein_coding	protein_coding	23.8661	23.9374	23.8186	2.30475	0.958274	-0.00717116	0.996796	15.5712	15.3022	15.7505	0.265652	0.0721108	0.0416267	0.758606	0.6556	0.64415	0.663233	0.0190833	0.961693	4.19e-08	FALSE	yes	1	TRUE	no	NA	NA
ENST00000373797.1	ENSG00000159023.19	EPB41	protein_coding	protein_coding	28.5487	28.5928	28.5193	2.32889	1.52412	-0.00370992	0.995371	1.51229	1.52648	1.50282	0.00277746	0.220202	-0.0223921	0.974248	0.05292	0.05375	0.0523667	-0.00138333	0.969171	4.19e-08	FALSE	yes	1	TRUE	no	NA	NA
ENST00000411957.1	ENSG00000133026.12	MYH10	protein_coding	protein_coding	23.8661	23.9374	23.8186	2.30475	0.958274	-0.00717116	0.996796	3.04552	2.98442	3.08625	0.267811	0.273283	0.0482469	NA	0.1278	0.12475	0.129833	0.00508333	0.976111	4.19e-08	FALSE	yes	0.238522	FALSE	no	NA	NA
ENST00000482464.5	ENSG00000159023.19	EPB41	protein_coding	processed_transcript	28.5487	28.5928	28.5193	2.32889	1.52412	-0.00370992	0.995371	9.02645	9.09797	8.97876	1.78017	0.755066	-0.0190074	0.970706	0.3158	0.3152	0.3162	0.001	0.987711	4.19e-08	NA	NA	0.00303255	FALSE	NA	NA	NA
ENST00000588765.4	ENSG00000267106.5	ZNF561-AS1	processed_transcript	antisense_RNA	6.44742	6.80287	6.21045	1.13909	1.08822	-0.131244	NA	0.395417	0	0.659028	0	0.0623931	6.06399	NA	0.0654	0	0.109	0.109	4.21e-08	4.21e-08	NA	NA	0.0152642	FALSE	NA	0	FALSE
ENST00000591932.5	ENSG00000267106.5	ZNF561-AS1	processed_transcript	antisense_RNA	6.44742	6.80287	6.21045	1.13909	1.08822	-0.131244	NA	2.2404	2.83676	1.84283	0.140201	0.189078	-0.619591	NA	0.35764	0.42545	0.312433	-0.113017	0.773878	4.21e-08	NA	NA	0.0543533	FALSE	NA	0	FALSE
ENST00000585797.4	ENSG00000267106.5	ZNF561-AS1	processed_transcript	antisense_RNA	6.44742	6.80287	6.21045	1.13909	1.08822	-0.131244	NA	0.654961	0.476608	0.773863	0.175877	0.318764	0.68784	NA	0.09662	0.06765	0.115933	0.0482833	0.830812	4.21e-08	NA	NA	0.131965	FALSE	NA	0	FALSE
ENST00000587536.5	ENSG00000267106.5	ZNF561-AS1	processed_transcript	antisense_RNA	6.44742	6.80287	6.21045	1.13909	1.08822	-0.131244	NA	0.57214	0.475413	0.636625	0.0343404	0.0895759	0.413714	NA	0.09398	0.07105	0.109267	0.0382167	0.864046	4.21e-08	NA	NA	0.306613	NA	NA	0	FALSE
ENST00000592851.5	ENSG00000267106.5	ZNF561-AS1	processed_transcript	antisense_RNA	6.44742	6.80287	6.21045	1.13909	1.08822	-0.131244	NA	0.178902	0.28945	0.105203	0.159133	0.0529788	-1.37813	NA	0.02602	0.03975	0.0168667	-0.0228833	0.867403	4.21e-08	NA	NA	0.229975	FALSE	NA	0	FALSE
ENST00000616951.1	ENSG00000267106.5	ZNF561-AS1	processed_transcript	processed_transcript	6.44742	6.80287	6.21045	1.13909	1.08822	-0.131244	NA	1.51501	1.81653	1.314	0.232679	0.634747	-0.464204	NA	0.22472	0.2688	0.195333	-0.0734667	0.932846	4.21e-08	NA	NA	0.225835	FALSE	NA	0	FALSE
ENST00000586614.5	ENSG00000267106.5	ZNF561-AS1	processed_transcript	antisense_RNA	6.44742	6.80287	6.21045	1.13909	1.08822	-0.131244	NA	0.31222	0.380438	0.266741	0.159901	0.151904	-0.496558	NA	0.04532	0.05345	0.0399	-0.01355	0.959638	4.21e-08	NA	NA	0.443571	NA	NA	0	FALSE
ENST00000591056.1	ENSG00000267106.5	ZNF561-AS1	processed_transcript	antisense_RNA	6.44742	6.80287	6.21045	1.13909	1.08822	-0.131244	NA	0.578365	0.527669	0.612162	0.236962	0.205523	0.210571	NA	0.09026	0.0738	0.101233	0.0274333	0.959638	4.21e-08	NA	NA	0.0390934	FALSE	NA	0	FALSE
ENST00000441084.1	ENSG00000119820.10	YIPF4	protein_coding	protein_coding	28.4448	30.4386	27.1157	3.03188	1.3509	-0.166713	0.475676	0.779124	1.94781	0	0.815055	0	-7.6131	NA	0.02476	0.0619	0	-0.0619	4.52e-08	4.52e-08	NA	no	0.00263932	FALSE	no	NA	NA
ENST00000437765.1	ENSG00000119820.10	YIPF4	protein_coding	nonsense_mediated_decay	28.4448	30.4386	27.1157	3.03188	1.3509	-0.166713	0.475676	22.9427	23.4976	22.5727	2.30609	1.42111	-0.0579118	0.922192	0.8079	0.77205	0.8318	0.05975	0.330204	4.52e-08	TRUE	no	0.0487937	FALSE	no	NA	NA
ENST00000238831.8	ENSG00000119820.10	YIPF4	protein_coding	protein_coding	28.4448	30.4386	27.1157	3.03188	1.3509	-0.166713	0.475676	2.66492	2.79971	2.57506	0.0572371	0.0870277	-0.120224	0.580576	0.09458	0.09305	0.0956	0.00255	0.969402	4.52e-08	FALSE	yes	0.999285	TRUE	no	NA	NA
ENST00000495355.1	ENSG00000119820.10	YIPF4	protein_coding	retained_intron	28.4448	30.4386	27.1157	3.03188	1.3509	-0.166713	0.475676	2.05812	2.19339	1.96794	0.0320286	0.448531	-0.15572	NA	0.07272	0.0729	0.0726	-0.0003	0.978718	4.52e-08	NA	NA	0.677352	TRUE	NA	NA	NA
ENST00000555618.1	ENSG00000257365.7	FNTB	protein_coding	retained_intron	16.2581	16.7292	15.9441	0.459661	0.10081	-0.0693081	0.814579	0.379887	0.949717	0	0.0627456	0	-6.58454	NA	0.02276	0.0569	0	-0.0569	4.54e-08	4.54e-08	NA	NA	0.0134687	FALSE	NA	NA	NA
ENST00000246166.2	ENSG00000257365.7	FNTB	protein_coding	protein_coding	16.2581	16.7292	15.9441	0.459661	0.10081	-0.0693081	0.814579	12.8481	13.0079	12.7416	0.918533	0.284639	-0.029826	0.928691	0.7903	0.77665	0.7994	0.02275	0.920686	4.54e-08	FALSE	yes	1	TRUE	no	NA	NA
ENST00000554334.5	ENSG00000257365.7	FNTB	protein_coding	retained_intron	16.2581	16.7292	15.9441	0.459661	0.10081	-0.0693081	0.814579	2.16159	2.03103	2.24864	0.104162	0.319762	0.146154	0.869632	0.13316	0.12165	0.140833	0.0191833	0.947877	4.54e-08	NA	NA	0.983015	TRUE	NA	NA	NA
ENST00000556709.1	ENSG00000257365.7	FNTB	protein_coding	processed_transcript	16.2581	16.7292	15.9441	0.459661	0.10081	-0.0693081	0.814579	0.249796	0.288426	0.224042	0.0378164	0.134981	-0.350605	NA	0.01536	0.0172	0.0141333	-0.00306667	0.959638	4.54e-08	NA	NA	0.00950138	FALSE	NA	NA	NA
ENST00000557300.1	ENSG00000257365.7	FNTB	protein_coding	retained_intron	16.2581	16.7292	15.9441	0.459661	0.10081	-0.0693081	0.814579	0.234882	0.230561	0.237763	0.230561	0.122991	0.0425591	NA	0.01458	0.01415	0.0148667	0.000716667	0.959698	4.54e-08	NA	NA	0.791827	TRUE	NA	NA	NA
ENST00000555742.5	ENSG00000257365.7	FNTB	protein_coding	processed_transcript	16.2581	16.7292	15.9441	0.459661	0.10081	-0.0693081	0.814579	0.242502	0.221561	0.256464	0.0992197	0.128874	0.202548	NA	0.01502	0.0134	0.0161	0.0027	0.992002	4.54e-08	NA	NA	0.0431391	FALSE	NA	NA	NA
ENST00000520144.1	ENSG00000151914.19	DST	protein_coding	retained_intron	30.9912	28.1063	32.9144	0.212579	0.964659	0.227751	0.0112747	0.480086	0	0.800143	0	0.054051	6.3401	NA	0.01464	0	0.0244	0.0244	4.8e-08	4.8e-08	NA	NA	0.152831	FALSE	NA	NA	NA
ENST00000523597.1	ENSG00000151914.19	DST	protein_coding	processed_transcript	30.9912	28.1063	32.9144	0.212579	0.964659	0.227751	0.0112747	1.51099	0.321145	2.30423	0.321145	0.397415	2.805	NA	0.04626	0.0115	0.0694333	0.0579333	0.34633	4.8e-08	NA	NA	0.239212	FALSE	NA	NA	NA
ENST00000524216.1	ENSG00000151914.19	DST	protein_coding	retained_intron	30.9912	28.1063	32.9144	0.212579	0.964659	0.227751	0.0112747	0.33313	0.110268	0.481704	0.110268	0.0896488	2.03153	NA	0.01042	0.0039	0.0147667	0.0108667	0.471802	4.8e-08	NA	NA	0.0123303	FALSE	NA	NA	NA
ENST00000523817.1	ENSG00000151914.19	DST	protein_coding	protein_coding	30.9912	28.1063	32.9144	0.212579	0.964659	0.227751	0.0112747	0.532576	0.163121	0.778879	0.163121	0.23086	2.18802	NA	0.0168	0.00585	0.0241	0.01825	0.644779	4.8e-08	FALSE	yes	0.165269	FALSE	no	NA	NA
ENST00000370765.10	ENSG00000151914.19	DST	protein_coding	protein_coding	30.9912	28.1063	32.9144	0.212579	0.964659	0.227751	0.0112747	1.30462	1.43464	1.21794	0.099088	0.0403838	-0.234475	0.500384	0.04268	0.05105	0.0371	-0.01395	0.660961	4.8e-08	FALSE	yes	1	TRUE	no	NA	NA
ENST00000340834.9	ENSG00000151914.19	DST	protein_coding	protein_coding	30.9912	28.1063	32.9144	0.212579	0.964659	0.227751	0.0112747	3.45433	3.5582	3.38508	0.020507	0.178988	-0.0717513	0.886246	0.11256	0.1266	0.1032	-0.0234	0.667829	4.8e-08	FALSE	yes	1	TRUE	no	NA	NA
ENST00000517840.1	ENSG00000151914.19	DST	protein_coding	retained_intron	30.9912	28.1063	32.9144	0.212579	0.964659	0.227751	0.0112747	0.4119	0.216634	0.542077	0.0840978	0.173406	1.28451	NA	0.01286	0.0077	0.0163	0.0086	0.727541	4.8e-08	NA	NA	0.0480961	FALSE	NA	NA	NA
ENST00000518464.5	ENSG00000151914.19	DST	protein_coding	retained_intron	30.9912	28.1063	32.9144	0.212579	0.964659	0.227751	0.0112747	0.903755	1.08938	0.780008	0.283965	0.130952	-0.476746	0.676664	0.02986	0.0387	0.0239667	-0.0147333	0.769505	4.8e-08	NA	NA	0.067534	FALSE	NA	NA	NA
ENST00000244364.10	ENSG00000151914.19	DST	protein_coding	protein_coding	30.9912	28.1063	32.9144	0.212579	0.964659	0.227751	0.0112747	3.8827	4.28425	3.61501	0.36471	0.587543	-0.24442	0.633665	0.12768	0.15255	0.1111	-0.04145	0.783017	4.8e-08	FALSE	yes	1	TRUE	no	NA	NA
ENST00000523943.1	ENSG00000151914.19	DST	protein_coding	protein_coding	30.9912	28.1063	32.9144	0.212579	0.964659	0.227751	0.0112747	1.98687	1.14551	2.54778	0.819269	0.638714	1.14636	NA	0.06206	0.04055	0.0764	0.03585	0.796775	4.8e-08	FALSE	no	0.175387	FALSE	no	NA	NA
ENST00000482156.5	ENSG00000151914.19	DST	protein_coding	retained_intron	30.9912	28.1063	32.9144	0.212579	0.964659	0.227751	0.0112747	0.799802	0.878352	0.747435	0.134111	0.0278856	-0.230008	NA	0.02618	0.03125	0.0228	-0.00845	0.809107	4.8e-08	NA	NA	0.958534	TRUE	NA	NA	NA
ENST00000449297.6	ENSG00000151914.19	DST	protein_coding	protein_coding	30.9912	28.1063	32.9144	0.212579	0.964659	0.227751	0.0112747	0.952632	1.14018	0.827599	0.253209	0.187075	-0.457529	NA	0.0315	0.0405	0.0255	-0.015	0.82922	4.8e-08	FALSE	yes	0.995777	TRUE	no	NA	NA
ENST00000524186.1	ENSG00000151914.19	DST	protein_coding	protein_coding	30.9912	28.1063	32.9144	0.212579	0.964659	0.227751	0.0112747	0.45585	0.722314	0.278206	0.541875	0.0663402	-1.34536	NA	0.01538	0.02585	0.0084	-0.01745	0.896359	4.8e-08	FALSE	no	0.158763	FALSE	no	NA	NA
ENST00000466429.5	ENSG00000151914.19	DST	protein_coding	retained_intron	30.9912	28.1063	32.9144	0.212579	0.964659	0.227751	0.0112747	1.14658	1.29938	1.04472	0.555135	0.0644096	-0.312015	NA	0.03754	0.0461	0.0318333	-0.0142667	0.938716	4.8e-08	NA	NA	0.997201	TRUE	NA	NA	NA
ENST00000312431.10	ENSG00000151914.19	DST	protein_coding	protein_coding	30.9912	28.1063	32.9144	0.212579	0.964659	0.227751	0.0112747	1.71502	1.52817	1.83958	0.396514	0.920436	0.265988	0.976921	0.0543	0.0543	0.0543	0	0.960153	4.8e-08	FALSE	yes	1	TRUE	no	NA	NA
ENST00000523292.5	ENSG00000151914.19	DST	protein_coding	protein_coding	30.9912	28.1063	32.9144	0.212579	0.964659	0.227751	0.0112747	7.93733	7.33103	8.34154	0.835227	0.528597	0.186059	0.714766	0.2562	0.2611	0.252933	-0.00816667	0.964147	4.8e-08	NA	no	0.976492	TRUE	no	NA	NA
ENST00000487754.2	ENSG00000151914.19	DST	protein_coding	retained_intron	30.9912	28.1063	32.9144	0.212579	0.964659	0.227751	0.0112747	0.36135	0.302865	0.40034	0.0479883	0.0431007	0.39128	NA	0.01158	0.01075	0.0121333	0.00138333	0.964217	4.8e-08	NA	NA	0.957034	TRUE	NA	NA	NA
ENST00000421834.6	ENSG00000151914.19	DST	protein_coding	protein_coding	30.9912	28.1063	32.9144	0.212579	0.964659	0.227751	0.0112747	1.85263	1.7348	1.93119	0.130899	0.268964	0.153878	0.804746	0.0602	0.06175	0.0591667	-0.00258333	0.968946	4.8e-08	FALSE	yes	1	TRUE	no	NA	NA
ENST00000570985.1	ENSG00000205220.11	PSMB10	protein_coding	retained_intron	100.125	91.3462	105.978	3.13159	4.37049	0.214328	0.125553	43.2703	42.9927	43.4554	1.09079	2.7323	0.0154387	0.972873	0.4339	0.4708	0.4093	-0.0615	0.0154416	4.82e-08	NA	NA	0.481325	NA	NA	NA	NA
ENST00000358514.8	ENSG00000205220.11	PSMB10	protein_coding	protein_coding	100.125	91.3462	105.978	3.13159	4.37049	0.214328	0.125553	43.0061	33.7226	49.1952	2.26605	1.55154	0.544667	1.47e-05	0.42626	0.36875	0.4646	0.09585	4.82e-08	4.82e-08	FALSE	yes	0.999977	TRUE	no	NA	NA
ENST00000574576.2	ENSG00000205220.11	PSMB10	protein_coding	protein_coding	100.125	91.3462	105.978	3.13159	4.37049	0.214328	0.125553	6.18656	7.03631	5.62006	0.650777	0.485216	-0.323717	NA	0.06262	0.0769	0.0531	-0.0238	0.119368	4.82e-08	FALSE	yes	0.267128	NA	no	NA	NA
ENST00000575556.1	ENSG00000205220.11	PSMB10	protein_coding	retained_intron	100.125	91.3462	105.978	3.13159	4.37049	0.214328	0.125553	2.7934	2.92043	2.70871	0.126981	0.119307	-0.108194	NA	0.02816	0.03205	0.0255667	-0.00648333	0.676916	4.82e-08	NA	NA	0.671237	TRUE	NA	NA	NA
ENST00000570304.1	ENSG00000205220.11	PSMB10	protein_coding	retained_intron	100.125	91.3462	105.978	3.13159	4.37049	0.214328	0.125553	4.86895	4.67415	4.99882	0.749044	0.105177	0.0966849	0.915963	0.04906	0.0515	0.0474333	-0.00406667	0.959638	4.82e-08	NA	NA	0.380006	NA	NA	NA	NA
ENST00000303575.8	ENSG00000170348.8	TMED10	protein_coding	protein_coding	629.003	603.298	646.14	2.61629	2.98572	0.0989754	0.171221	101.738	108.815	97.0193	0.350068	0.996746	-0.165524	0.000128065	0.16224	0.18035	0.150167	-0.0301833	5.19e-08	5.19e-08	FALSE	yes	0.994235	TRUE	yes	NA	NA
ENST00000555085.1	ENSG00000170348.8	TMED10	protein_coding	retained_intron	629.003	603.298	646.14	2.61629	2.98572	0.0989754	0.171221	256.757	237.853	269.359	2.76106	1.31083	0.179454	0.0142494	0.40786	0.39425	0.416933	0.0226833	0.00963895	5.19e-08	NA	NA	0.150035	FALSE	NA	NA	NA
ENST00000557670.5	ENSG00000170348.8	TMED10	protein_coding	processed_transcript	629.003	603.298	646.14	2.61629	2.98572	0.0989754	0.171221	187.42	173.587	196.642	0.627159	10.1919	0.179905	0.21775	0.29764	0.28775	0.304233	0.0164833	0.932403	5.19e-08	NA	NA	0.228239	FALSE	NA	NA	NA
ENST00000556969.5	ENSG00000170348.8	TMED10	protein_coding	retained_intron	629.003	603.298	646.14	2.61629	2.98572	0.0989754	0.171221	66.537	66.9136	66.286	0.842878	6.26303	-0.0135935	0.980666	0.10596	0.1109	0.102667	-0.00823333	0.959638	5.19e-08	NA	NA	0.351126	NA	NA	NA	NA
ENST00000555036.1	ENSG00000170348.8	TMED10	protein_coding	retained_intron	629.003	603.298	646.14	2.61629	2.98572	0.0989754	0.171221	13.8258	13.5485	14.0107	1.4892	0.781036	0.0483583	0.952284	0.022	0.02245	0.0217	-0.00075	0.960788	5.19e-08	NA	NA	0.166804	FALSE	NA	NA	NA
ENST00000464469.2	ENSG00000198538.10	ZNF28	protein_coding	processed_transcript	28.3963	31.5375	26.3021	1.51295	2.62264	-0.261795	0.221702	0.442038	1.1051	0	0.218124	0	-6.80102	NA	0.0139	0.03475	0	-0.03475	6.6e-08	6.6e-08	NA	NA	0.308466	NA	NA	NA	NA
ENST00000594602.5	ENSG00000198538.10	ZNF28	protein_coding	protein_coding	28.3963	31.5375	26.3021	1.51295	2.62264	-0.261795	0.221702	5.75233	5.41415	5.97778	0.0911964	1.17778	0.142626	0.910262	0.20272	0.17225	0.223033	0.0507833	0.601036	6.6e-08	FALSE	yes	0.480561	NA	no	NA	NA
ENST00000542421.1	ENSG00000198538.10	ZNF28	protein_coding	processed_transcript	28.3963	31.5375	26.3021	1.51295	2.62264	-0.261795	0.221702	9.57227	11.8211	8.07306	1.96245	1.68731	-0.54961	NA	0.329	0.3727	0.299867	-0.0728333	0.811897	6.6e-08	NA	NA	0.00905876	FALSE	NA	NA	NA
ENST00000391783.6	ENSG00000198538.10	ZNF28	protein_coding	protein_coding	28.3963	31.5375	26.3021	1.51295	2.62264	-0.261795	0.221702	0.546793	0.421901	0.630055	0.281559	0.155649	0.567495	NA	0.02044	0.0138	0.0248667	0.0110667	0.910579	6.6e-08	FALSE	yes	0.946044	TRUE	no	NA	NA
ENST00000457749.6	ENSG00000198538.10	ZNF28	protein_coding	protein_coding	28.3963	31.5375	26.3021	1.51295	2.62264	-0.261795	0.221702	11.3051	11.8761	10.9244	0.368146	0.203287	-0.120402	0.434601	0.40662	0.378	0.4257	0.0477	0.959638	6.6e-08	FALSE	yes	1	TRUE	no	NA	NA
ENST00000339844.6	ENSG00000198538.10	ZNF28	protein_coding	protein_coding	28.3963	31.5375	26.3021	1.51295	2.62264	-0.261795	0.221702	0.438435	0.44517	0.433946	0.0441941	0.135422	-0.0360213	NA	0.01522	0.0142	0.0159	0.0017	0.964484	6.6e-08	FALSE	no	0.151839	FALSE	no	NA	NA
ENST00000355203.6	ENSG00000197021.8	CXorf40B	protein_coding	protein_coding	62.5044	60.0123	64.1658	0.617819	0.677278	0.0965304	0.547698	26.9897	30.6664	24.5386	0.0819758	1.06471	-0.321485	0.0633463	0.43376	0.511	0.382267	-0.128733	6.61e-08	6.61e-08	FALSE	no	0.972139	TRUE	no	0	FALSE
ENST00000370404.5	ENSG00000197021.8	CXorf40B	protein_coding	protein_coding	62.5044	60.0123	64.1658	0.617819	0.677278	0.0965304	0.547698	15.7644	10.5276	19.2556	0.493234	1.28238	0.870478	2.96e-06	0.25038	0.17535	0.3004	0.12505	0.000713798	6.61e-08	FALSE	no	0.929422	TRUE	no	0	FALSE
ENST00000370406.7	ENSG00000197021.8	CXorf40B	protein_coding	protein_coding	62.5044	60.0123	64.1658	0.617819	0.677278	0.0965304	0.547698	3.29722	4.28439	2.6391	0.216557	0.732031	-0.696953	0.439653	0.05336	0.07145	0.0413	-0.03015	0.635105	6.61e-08	FALSE	no	0.897419	TRUE	no	0	FALSE
ENST00000462691.5	ENSG00000197021.8	CXorf40B	protein_coding	protein_coding	62.5044	60.0123	64.1658	0.617819	0.677278	0.0965304	0.547698	9.91633	8.726	10.7099	0.826786	0.322614	0.295245	0.333007	0.15824	0.1453	0.166867	0.0215667	0.647996	6.61e-08	FALSE	no	0.781312	TRUE	no	0	FALSE
ENST00000370409.7	ENSG00000197021.8	CXorf40B	protein_coding	protein_coding	62.5044	60.0123	64.1658	0.617819	0.677278	0.0965304	0.547698	1.04949	1.47186	0.767905	0.11857	0.384064	-0.929745	NA	0.01694	0.0245	0.0119	-0.0126	0.91875	6.61e-08	FALSE	no	0.107765	FALSE	no	0	FALSE
ENST00000497550.1	ENSG00000197021.8	CXorf40B	protein_coding	processed_transcript	62.5044	60.0123	64.1658	0.617819	0.677278	0.0965304	0.547698	5.31844	4.33603	5.97339	0.68619	1.16628	0.461266	NA	0.08468	0.0724	0.0928667	0.0204667	0.934532	6.61e-08	NA	NA	0.0906298	FALSE	NA	0	FALSE
ENST00000476471.1	ENSG00000163681.14	SLMAP	protein_coding	retained_intron	21.1278	20.721	21.399	0.311397	0.896725	0.0464214	0.810646	0.660878	0	1.10146	0	0.224256	6.79632	NA	0.03062	0	0.0510333	0.0510333	6.63e-08	6.63e-08	NA	NA	0.263005	NA	NA	NA	NA
ENST00000417128.5	ENSG00000163681.14	SLMAP	protein_coding	protein_coding	21.1278	20.721	21.399	0.311397	0.896725	0.0464214	0.810646	2.98698	3.72206	2.49692	0.367885	0.127492	-0.574058	0.0487979	0.1425	0.17995	0.117533	-0.0624167	0.154718	6.63e-08	NA	no	1	TRUE	no	NA	NA
ENST00000495364.5	ENSG00000163681.14	SLMAP	protein_coding	protein_coding	21.1278	20.721	21.399	0.311397	0.896725	0.0464214	0.810646	0.930167	0.265072	1.37356	0.265072	0.360864	2.33051	NA	0.0431	0.0126	0.0634333	0.0508333	0.518351	6.63e-08	FALSE	no	1	TRUE	no	NA	NA
ENST00000449503.6	ENSG00000163681.14	SLMAP	protein_coding	protein_coding	21.1278	20.721	21.399	0.311397	0.896725	0.0464214	0.810646	2.94335	3.59866	2.50647	0.581321	0.395759	-0.52006	0.35055	0.13944	0.17325	0.1169	-0.05635	0.612124	6.63e-08	FALSE	yes	1	TRUE	no	NA	NA
ENST00000461354.5	ENSG00000163681.14	SLMAP	protein_coding	protein_coding	21.1278	20.721	21.399	0.311397	0.896725	0.0464214	0.810646	0.616197	0.318158	0.81489	0.0326957	0.351342	1.32981	NA	0.02948	0.0154	0.0388667	0.0234667	0.824936	6.63e-08	FALSE	no	0.0664422	FALSE	no	NA	NA
ENST00000438794.5	ENSG00000163681.14	SLMAP	protein_coding	protein_coding	21.1278	20.721	21.399	0.311397	0.896725	0.0464214	0.810646	0.506953	0.398609	0.579182	0.0825616	0.0680861	0.527993	NA	0.02386	0.0193	0.0269	0.0076	0.87521	6.63e-08	NA	no	0.999994	TRUE	no	NA	NA
ENST00000416658.5	ENSG00000163681.14	SLMAP	protein_coding	protein_coding	21.1278	20.721	21.399	0.311397	0.896725	0.0464214	0.810646	0.216136	0.540339	0	0.540339	0	-5.78225	NA	0.01028	0.0257	0	-0.0257	0.915247	6.63e-08	NA	no	1	TRUE	no	NA	NA
ENST00000475055.1	ENSG00000163681.14	SLMAP	protein_coding	processed_transcript	21.1278	20.721	21.399	0.311397	0.896725	0.0464214	0.810646	0.241819	0.066268	0.358854	0.066268	0.200868	2.2739	NA	0.0117	0.00315	0.0174	0.01425	0.918907	6.63e-08	NA	NA	0.0504627	FALSE	NA	NA	NA
ENST00000472546.5	ENSG00000163681.14	SLMAP	protein_coding	processed_transcript	21.1278	20.721	21.399	0.311397	0.896725	0.0464214	0.810646	0.252466	0.272707	0.238972	0.0280249	0.165113	-0.183322	NA	0.0116	0.01315	0.0105667	-0.00258333	0.959638	6.63e-08	NA	NA	0.086394	FALSE	NA	NA	NA
ENST00000295951.7	ENSG00000163681.14	SLMAP	protein_coding	protein_coding	21.1278	20.721	21.399	0.311397	0.896725	0.0464214	0.810646	6.76875	6.73112	6.79383	0.175684	0.104874	0.0133601	0.955809	0.32092	0.32505	0.318167	-0.00688333	0.959698	6.63e-08	FALSE	yes	1	TRUE	no	NA	NA
ENST00000497084.1	ENSG00000163681.14	SLMAP	protein_coding	retained_intron	21.1278	20.721	21.399	0.311397	0.896725	0.0464214	0.810646	0.327865	0.296658	0.34867	0.184512	0.103108	0.226026	NA	0.0154	0.01445	0.0160333	0.00158333	0.964799	6.63e-08	NA	NA	0.0602905	FALSE	NA	NA	NA
ENST00000428312.5	ENSG00000163681.14	SLMAP	protein_coding	protein_coding	21.1278	20.721	21.399	0.311397	0.896725	0.0464214	0.810646	3.46349	3.33126	3.55165	0.5582	0.273119	0.0921516	0.886001	0.16422	0.1612	0.166233	0.00503333	0.967698	6.63e-08	FALSE	yes	1	TRUE	no	NA	NA
ENST00000465203.5	ENSG00000163681.14	SLMAP	protein_coding	protein_coding	21.1278	20.721	21.399	0.311397	0.896725	0.0464214	0.810646	0.928816	0.799266	1.01518	0.0775104	0.377815	0.341194	NA	0.04348	0.03855	0.0467667	0.00821667	0.992614	6.63e-08	FALSE	no	0.0864025	FALSE	no	NA	NA
ENST00000582781.5	ENSG00000171475.13	WIPF2	protein_coding	nonsense_mediated_decay	13.403	13.3879	13.4131	0.426399	0.369086	0.00270672	0.973615	0.493777	0	0.822962	0	0.138337	6.38018	NA	0.03658	0	0.0609667	0.0609667	6.68e-08	6.68e-08	TRUE	yes	0.998224	TRUE	no	NA	NA
ENST00000578304.1	ENSG00000171475.13	WIPF2	protein_coding	retained_intron	13.403	13.3879	13.4131	0.426399	0.369086	0.00270672	0.973615	0.452781	0.868925	0.175351	0.0533187	0.175351	-2.24548	NA	0.03366	0.0651	0.0127	-0.0524	0.55077	6.68e-08	NA	NA	0.645166	TRUE	NA	NA	NA
ENST00000394103.7	ENSG00000171475.13	WIPF2	protein_coding	protein_coding	13.403	13.3879	13.4131	0.426399	0.369086	0.00270672	0.973615	0.602534	1.09951	0.271217	0.317607	0.237326	-1.98017	NA	0.0444	0.08145	0.0197	-0.06175	0.580347	6.68e-08	FALSE	yes	0.745155	TRUE	no	NA	NA
ENST00000585043.5	ENSG00000171475.13	WIPF2	protein_coding	protein_coding	13.403	13.3879	13.4131	0.426399	0.369086	0.00270672	0.973615	0.834159	0.595706	0.993128	0.0859522	0.234428	0.727817	NA	0.06296	0.04475	0.0751	0.03035	0.848483	6.68e-08	FALSE	yes	1	TRUE	no	NA	NA
ENST00000583130.5	ENSG00000171475.13	WIPF2	protein_coding	protein_coding	13.403	13.3879	13.4131	0.426399	0.369086	0.00270672	0.973615	0.199061	0.203902	0.195835	0.203902	0.195835	-0.055461	NA	0.01444	0.01475	0.0142333	-0.000516667	0.959698	6.68e-08	FALSE	yes	0.999995	TRUE	no	NA	NA
ENST00000323571.8	ENSG00000171475.13	WIPF2	protein_coding	protein_coding	13.403	13.3879	13.4131	0.426399	0.369086	0.00270672	0.973615	10.2582	10.2907	10.2366	0.0344349	0.122158	-0.00759551	0.988138	0.76672	0.7695	0.764867	-0.00463333	0.966696	6.68e-08	FALSE	yes	0.999477	TRUE	no	NA	NA
ENST00000578623.1	ENSG00000171475.13	WIPF2	protein_coding	retained_intron	13.403	13.3879	13.4131	0.426399	0.369086	0.00270672	0.973615	0.445415	0.329206	0.522887	0.0785967	0.266458	0.651666	NA	0.03252	0.0244	0.0379333	0.0135333	0.999913	6.68e-08	NA	NA	0.36848	NA	NA	NA	NA
[truncated: 10,667 more rows]

## Sheet: Full_list_of_3UTR_switches
gene_name	isoformUpregulated	isoformDownregulated	featureCompared	isoformsDifferent	switchConsequence
GCLC	ENST00000504353.1	ENST00000510837.5	3_utr_length	NA	NA
[truncated: 1,683 more rows]
