# Supplementary material
Source: Preprints.org preprint supplement (doi:10.20944/preprints202004.0323.v1)
Supplement: Supplementary file 1 [file supplementary › Supplementary_Table_1_DE_analysis_microarray.xlsx]

## Sheet: a_Analysed_Datasets
ID	Cancer samples	Normal samples	GEO ID	PMID Reference
GSE18864	84	0	GSE18864	20100965, 20098429, 20189874
GSE19615	115	0	GSE19615	20098429
GSE20685	327	0	GSE20685	21501481
GSE20711	88	2	GSE20711	21910250
GSE21653	266	0	GSE21653	20490655, 22110708
GSE23593	50	0	GSE23593	20368555
GSE26639	226	0	GSE26639	21631949
GSE42568	104	17	GSE42568	23740839
GSE6532	87	0	GSE6532	17401012, 18498629, 20479250, 19552798
GSE54002	417	16	GSE54002	25214461
GSE23720	197	0	GSE23720	21339811, 22110708, 22666420
GSE36774	107	0	GSE36774	22564725
GSE47109	246	0	GSE47109	23774991
GSE45827	130	11	GSE45827	27006338
GSE29044	111	13	GSE29044	23704896
GSE5460	129	0	GSE5460	18297396
GSE71258	128	0	GSE71258	26269605
GSE43365	111	0	GSE43365	23990869
GSE36771	107	0	GSE36771	22564725
GSE61304	58	4	GSE61304	26517092, 26474389
GSE43358	57	0	GSE43358	25412710, 26440892
GSE16391	55	0	GSE16391	19573224
GSE31448	357	0	GSE31448	22110708
GSE76275	265	0	GSE76275	25208879, 26921331
GSE50948	156	0	GSE50948	24443618
GSE88770	117	0	GSE88770	23028037
GSE32646	115	0	GSE32646	22320227
GSE17907	105	4	GSE17907	20932292
GSE58984	94	0	GSE58984	-
GSE18728	61	0	GSE18728	20012355

## Sheet: b_Clinical_Data_Cohort_1
ID	DSCAM-AS1 dCt	DSCAM-AS1 status (1=positive, 0=negative)	ER status (1=positive, 0=negative)	PR status (1=positive, 0=negative)	HER2 status (1=positive, 0=negative)	Grade	pT	pN	Histology	Relapse Months	Relapse (1=yes, 0=no)	Mitosis (1=yes, 0=no)	Invasion (1=yes, 0=no)	IHC HER2 score	Subtype
Cohort_1_39	11.938	1	1	1	1	3	1c	1a*	2	34	0	8	1	3	Luminal A
Cohort_1_23	12.8558	1	1	1	0	2	1c	0 (sn) (i-) *	2	42	1	20	1	2	Luminal B
Cohort_1_17	13.0459	1	1	1	0	2	2	0mi*	6	40	0	2	0	1	Luminal A
Cohort_1_18	14.7456	1	1	1	0	2	2	3a	2	69	0	12	1	2	Luminal B
Cohort_1_38	15.0526	1	1	1	0	3	2	1a*	3	56	0	13	1	0	Luminal B
Cohort_1_40	15.2026	1	1	1	0	3	1c	1c	2	21	1	32	1	1	Luminal B
Cohort_1_24	15.5792	1	1	1	0	2	1c	0 (i-) sn*	2	65	0	9	0	0	Luminal B
Cohort_1_25	15.6339	1	1	1	1	2	1c	0 (i-) sn	2	NA	0	2	0	3	Luminal B
Cohort_1_32	15.944	1	1	0	1	3	2	0 (sn) (i-) *	2	29	1	8	0	3	Luminal B
Cohort_1_19	16.0349	1	1	1	1	2	2	0 (sn) (i-) *	2	41	1	9	1	3	Luminal B
Cohort_1_20	16.1737	1	1	1	1	2	2	1a	2	28	1	1	1	3	Luminal B
Cohort_1_41	17.3728	1	1	1	1	3	3m	3a	2	24	0	16	1	3	Luminal B
Cohort_1_26	17.5157	1	1	1	0	2	1c	1a*	2	37	0	15	1	1	Luminal A
Cohort_1_33	17.65	1	1	1	0	3	2	1a*	2	3	0	12	1	2	Luminal B
Cohort_1_15	17.6968	0	0	0	1	3	4b	0	2	8	0	26	1	3	HER2
Cohort_1_42	17.9482	1	1	0	1	NA	NA	NA	2	20	1	NA	NA	3	HER2
Cohort_1_31	18.072	1	1	1	0	2	1c	2a	2	24	1	4	0	2	Luminal A
Cohort_1_1	18.3468	0	0	0	1	2	1c	0	2	36	0	6	0	3	HER2
Cohort_1_27	18.4679	1	1	1	1	2	1c	0	2	21	1	6	1	3	Luminal B
Cohort_1_34	18.5549	1	1	1	0	3	2	1a*	2	70	1	20	1	0	Luminal B
Cohort_1_4	18.7653	0	0	0	0	3	2	1a	2	0	0	45	1	1	HER2
Cohort_1_35	18.8307	1	1	1	0	3	2	2a	3	71	0	10	1	0	Luminal B
Cohort_1_21	19.5372	1	1	1	0	2	2	1a	3	46	0	13	1	0	Luminal B
Cohort_1_22	19.7412	1	1	1	1	2	3	3a	6	2	0	5	1	3	Luminal B
Cohort_1_5	20.3864	0	0	0	1	3	2	0	2	8	0	25	0	3	HER2
Cohort_1_14	20.5323	0	0	0	0	3	2m	0 sn (i-) *	2	15	1	47	1	0	TNBC
Cohort_1_36	21.0173	1	1	1	1	3	2	0 sn)(i+) *	2	57	0	25	1	3	HER2
Cohort_1_2	21.2711	0	0	0	0	3	2	0 (i-) sn*	2	13	1	25	1	0	TNBC
Cohort_1_37	21.353	1	1	1	0	3	2	0 sn*	2	60	0	33	1	1	Luminal B
Cohort_1_6	21.8174	0	0	0	0	3	2	1a	2	34	0	30	1	0	TNBC
Cohort_1_7	21.9311	0	0	0	0	3	2	0 (i+) sn*	8	13	0	63	1	1	HER2
Cohort_1_8	21.9886	0	0	0	0	3	2	2a	2	20	0	35	1	0	TNBC
Cohort_1_9	22.0107	0	0	0	0	3	2	1a*	8	39	0	8	1	0	TNBC
Cohort_1_28	22.1604	1	1	1	0	2	1c	1mic (sn) +	2	1	0	2	NA	2	Luminal A
Cohort_1_13	22.2115	0	0	0	0	3	2m	0 (i-) sn*	2	69	0	10	0	1	HER2
Cohort_1_10	22.497	0	0	0	0	3	3	1a	2	13	1	14	1	0	TNBC
Cohort_1_11	22.514	0	0	0	0	3	1c	1a*	2	54	0	12	1	0	TNBC
Cohort_1_29	22.5754	1	1	1	0	2	1c	0(sn)*	2	38	0	6	0	1	Luminal A
Cohort_1_16	23.2382	1	1	1	0	1	2	1a*	3	58	1	6	1	2	Luminal A
Cohort_1_3	23.7214	0	0	0	0	3	2	1a	6	54	0	10	1	0	TNBC
Cohort_1_12	28.9655	0	0	0	0	3	1c	1a	2	8	1	10	1	1	HER2
Cohort_1_30	30.0635	1	1	1	0	2	1c	1a	2	44	0	4	1	1	Luminal B

## Sheet: c_Clinical_Data_Cohort_2
ID	DSCAM-AS1 dCt	DSCAM-AS1 status (1=positive, 0=negative)	Age	Menopause (1= pre, 2=peri (0-2 years), 3=post (>3 years from last menstruation)	ER (fmol/mg)	PR (fmol/mg)	PR status (1=positive, 0=negative)	Histology (1=intraductal carcinoma, 2=infiltrating ductal carcinoma, 3=infiltrating ductal carcinoma + infiltrating lobular carcinoma, 4=infiltrating ductal carcinoma with various aspects, 5=non-inflating lobular carcinoma, 6=infiltrating lobular carcinomaca, 7=medullary carcinoma, 8=others, 9=pluricentric infiltrating ductal carcinoma, 10=pluricentric infiltrating lobular carcinoma)	Grade	pTNM classification (ICD-O 174)	pT	pN	Sedeme	Relapse (1=no, 3=yes)	Living status (1=living, 2=death by tumor)
Cohort_2_1	0.118333	0	77	3	644	46	0	2	1	T2N0M0	2	0	NA	NA	NA
Cohort_2_31	4.987	0	67	3	83	14	0	8	NA	T1N0M0	1	0	NA	1	1
Cohort_2_30	7.031	1	78	3	667	66	1	6	NA	T2N0M0	2	0	NA	1	1
Cohort_2_40	8.83367	1	58	3	313	62	1	6	3	T1cN1M0	1	1	NA	1	1
Cohort_2_29	10.5663	1	67	3	436	52	1	2	2	T4N0M0	4	0	NA	3	2
Cohort_2_28	10.625	1	78	3	605	282	1	2	3	T2N0M0	2	0	NA	1	1
Cohort_2_27	10.8013	1	66	3	860	89	1	3	3	T1cN0M0	1	0	NA	1	1
Cohort_2_39	11.5957	1	69	3	1236	1109	1	6	3	T2N1M0	2	1	3	3	2
Cohort_2_26	11.9587	1	64	3	95	80	1	8	2	T1cN0M0	1	0	NA	1	1
Cohort_2_52	12.0063	1	55	3	51	938	1	2	2	T1cN1M0	1	1	NA	1	1
Cohort_2_25	12.8827	0	60	3	313	766	1	6	2	T1N0M0	1	0	NA	NA	1
Cohort_2_24	12.8973	0	66	3	48	8	0	6	NA	T2N0M0	2	0	NA	NA	1
Cohort_2_23	13.0087	1	58	3	355	973	1	4	2	T2N0M0	2	0	NA	1	1
Cohort_2_22	13.0227	1	65	3	288	496	1	4	NA	T1N0M0	1	0	NA	1	1
Cohort_2_21	13.6503	1	59	3	379	65	1	8	2	T2(m)N0M0	2	0	8	3	1
Cohort_2_20	14.089	1	70	3	232	59	1	2	3	T3N0M0	3	0	NA	1	1
Cohort_2_46	14.3773	1	76	3	297	108	1	8	2	T1M0	1	NA	NA	1	1
Cohort_2_43	14.607	1	70	3	773	1859	1	4	2	T3N2M0	3	2	NA	1	1
Cohort_2_19	14.8463	1	59	3	79	28	0	2	3	T2N0M0	2	0	NA	1	1
Cohort_2_18	15.5037	1	49	NA	18	108	1	4	1	T1cN0M0	1	0	NA	1	1
Cohort_2_17	15.5613	0	73	3	8	27	0	2	2	T1cN0M0	1	0	NA	1	1
Cohort_2_42	15.5712	0	43	1	32	29	0	2	2	T3N2M0	3	2	NA	1	1
Cohort_2_49	15.691	0	75	3	5	21	0	2	3	T1N0M0	1	0	2	NA	1
Cohort_2_48	15.838	0	55	3	328	54	1	4	3	T2N0M0	2	0	NA	1	1
Cohort_2_16	15.854	0	76	3	9	12	0	2	2	T2N0M0	2	0	NA	1	1
Cohort_2_15	15.8673	0	68	3	164	55	1	3	2	T1N0M0	1	0	NA	1	1
Cohort_2_38	15.8935	0	76	3	96	425	1	2	2	T1cN1bM0	1	1	NA	1	2
Cohort_2_37	15.933	1	59	3	309	52	1	3	3	T2N1M0	2	1	NA	1	1
Cohort_2_14	15.9937	1	79	3	610	1277	1	2	2	T4N0M0	4	0	NA	1	1
Cohort_2_45	16.15	0	84	3	304	412	1	2	2	T1M0	1	NA	NA	NA	2
Cohort_2_36	16.2033	1	71	3	158	252	1	4	3	T2N1iM0	2	1	5	3	1
Cohort_2_13	16.2693	0	73	3	794	592	1	2	2	T1cN0M0	1	0	NA	1	1
Cohort_2_12	16.3033	0	57	3	9	25	0	2	3	T2N0M0	2	0	NA	1	1
Cohort_2_35	16.517	0	69	3	131	98	1	4	2	T2N1biiM0	2	1	NA	1	1
Cohort_2_11	16.526	0	64	3	16	10	0	2	2	T1cN0M0	1	0	NA	1	1
Cohort_2_10	16.5303	0	59	3	231	690	1	2	3	T2N0M0	2	0	NA	1	1
Cohort_2_34	16.5533	0	77	3	380	13	0	3	2	T1cN1M0	1	1	NA	1	1
Cohort_2_9	16.5947	0	46	NA	92	2358	1	8	2	T2N0M0	2	0	NA	NA	1
Cohort_2_8	16.6772	0	66	3	78	332	1	4	2	T1cN0M0	1	0	NA	1	1
Cohort_2_7	16.8327	0	85	3	850	426	1	8	1	T2N0M0	2	0	NA	NA	NA
Cohort_2_6	17.0268	0	57	NA	104	63	1	8	1	T1N0M0	1	0	NA	1	1
Cohort_2_5	17.0763	0	74	3	1292	184	1	2	2	T1N0M0	1	0	NA	1	1
Cohort_2_51	17.0767	1	71	3	231	112	1	6	1	T2N1M0	2	1	NA	1	1
Cohort_2_41	17.0948	0	73	3	326	304	1	2	2	T2N2M0	2	2	NA	1	1
Cohort_2_4	17.498	0	73	3	1001	1490	1	2	NA	T1N0M0	1	0	7	NA	1
Cohort_2_44	17.5483	0	61	3	146	4	0	2	1	T2N3M0	2	3	1	NA	2
Cohort_2_3	17.675	0	75	3	556	509	1	3	2	T1N0M0	1	0	NA	1	1
Cohort_2_33	17.8573	0	75	3	4	10	0	2	3	T4N1M0	4	1	NA	1	1
Cohort_2_50	17.965	0	66	3	215	118	1	3	2	T2N1biiiM0	2	1	NA	NA	1
Cohort_2_32	18.0747	0	52	2	42	39	0	3	3	T1c(m)N1M0	1	1	NA	1	1
Cohort_2_2	19.118	0	68	3	298	420	1	8	2	T1cN0M0	1	0	NA	1	1

## Sheet: d_DSCAM-AS1_DE_analyses
Dataset	Test	log2FC	p-value	Samples	Significant
Cohort 1	ER status_Pos vs Neg	4.90456	<0.001	All	Yes
Cohort 1	Subtype_HER2+ vs Basal	2.64617	0.5058	All	No
Cohort 1	Subtype_Luminal B vs Luminal A	-1.56397	0.5738	All	No
Cohort 1	Subtype_Luminal vs Non luminal	4.77423	<0.001	All	Yes
Cohort 1	Grade_G3 vs G2	-0.673042	0.5985	ER+ tumors	No
Cohort 1	HER2 status_Pos vs Neg	0.550192	0.1779	ER+ tumors	No
Cohort 1	Lymph node invasion_Yes vs No	-0.584646	0.1779	ER+ tumors	No
Cohort 1	PR status_Pos vs Neg	-0.0335484	0.4093	ER+ tumors	No
Cohort 1	Relapse_Yes vs No	1.2837	0.6685	ER+ tumors	No
Cohort 1	T status_T2 vs T1	-1.09198	0.8801	ER+ tumors	No
Cohort 2	Age_>50 vs <=50	-0.0511433	0.8297	ER+ tumors	No
Cohort 2	Grade_G2 vs G1	0.396664	0.9028	ER+ tumors	No
Cohort 2	Grade_G3 vs G1	0.177033	0.3291	ER+ tumors	No
Cohort 2	Grade_G3 vs G2	-0.219631	0.1044	ER+ tumors	No
Cohort 2	Grade_G3-G2 vs G1	0.317851	0.755	ER+ tumors	No
Cohort 2	Lymph node invasion_Yes vs No	0.266786	0.4987	ER+ tumors	No
Cohort 2	PR status_Pos vs Neg	0.0595178	0.3193	ER+ tumors	No
Cohort 2	Relapse_Yes vs No	0.189262	<0.001	ER+ tumors	Yes
Cohort 2	T status_T2 vs T1	0.0712655	0.3385	ER+ tumors	No
Cohort 2	T status_T3,T4 vs T2,T1	0.131804	0.4374	ER+ tumors	No
GSE16391	Grade_G2 vs G1	1.80735	<0.001	ER+ tumors	Yes
GSE16391	Grade_G3 vs G1	3.08406	<0.001	ER+ tumors	Yes
GSE16391	Grade_G3 vs G2	1.27501	0.104	ER+ tumors	No
GSE16391	Grade_G3-G2 vs G1	2.24184	<0.001	ER+ tumors	Yes
GSE16391	HER2 status_Pos vs Neg	0.422233	0.772	ER+ tumors	No
GSE16391	Lymph node invasion_Yes vs No	-0.304006	0.675	ER+ tumors	No
GSE17907	ER status_Pos vs Neg	2.54844	<0.001	All	Yes
GSE17907	Subtype_Luminal vs Non luminal	1.94111	0.034	All	Yes
GSE17907	Age_>50 vs <=50	0.356144	0.5	ER- tumors	No
GSE17907	Grade_G3 vs G2	0.790772	0.131	ER- tumors	No
GSE17907	Lymph node invasion_Yes vs No	0.847997	0.025	ER- tumors	Yes
GSE17907	Metastasis_Yes vs No	-0.395929	0.457	ER- tumors	No
GSE17907	P53 IHC_Pos vs Neg	0.454176	0.413	ER- tumors	No
GSE17907	T status_T3 vs T2,T1	0.454176	0.463	ER- tumors	No
GSE17907	Age_>50 vs <=50	-0.286304	0.763	ER+ tumors	No
GSE17907	Grade_G2 vs G1	1.94111	0.454	ER+ tumors	No
GSE17907	Grade_G3 vs G1	1.60407	0.521	ER+ tumors	No
GSE17907	Grade_G3 vs G2	-0.321928	0.744	ER+ tumors	No
GSE17907	Grade_G3-G2 vs G1	1.70929	0.496	ER+ tumors	No
GSE17907	HER2 status_Pos vs Neg	0.443607	0.811	ER+ tumors	No
GSE17907	Lymph node invasion_Yes vs No	0.731183	0.555	ER+ tumors	No
GSE17907	Metastasis_Yes vs No	0.948601	0.247	ER+ tumors	No
GSE17907	P53 IHC_Pos vs Neg	0.815575	0.603	ER+ tumors	No
GSE17907	PR status_Pos vs Neg	-0.473931	0.534	ER+ tumors	No
GSE17907	T status_T3 vs T2,T1	-2.47393	0.072	ER+ tumors	No
GSE18728	ER status_Pos vs Neg	1.04264	0.002	All	Yes
GSE18728	HER2 status_Pos vs Neg	-0.0144996	0.327	ER- tumors	No
GSE18728	PR status_Pos vs Neg	-0.0144996	0.329	ER- tumors	No
GSE18728	HER2 status_Pos vs Neg	-0.621488	0.286	ER+ tumors	No
GSE18728	PR status_Pos vs Neg	-0.120294	0.86	ER+ tumors	No
GSE18864	ER status_Pos vs Neg	1.44361	0.006	All	Yes
GSE18864	Age_>50 vs <=50	-0.0740006	0.708	ER- tumors	No
GSE18864	HER2 status_Pos vs Neg	1.14405	0.005	ER- tumors	Yes
GSE18864	Age_>50 vs <=50	-1.32193	0.216	ER+ tumors	No
GSE18864	Grade_G2 vs G1	1.40599	0.01	ER+ tumors	Yes
GSE18864	Grade_G3 vs G1	4.13093	0.021	ER+ tumors	Yes
GSE18864	Grade_G3 vs G2	5.54288	0.007	ER+ tumors	Yes
GSE18864	Grade_G3-G2 vs G1	2.58736	0.001	ER+ tumors	Yes
GSE18864	HER2 status_Pos vs Neg	-0.104697	0.91	ER+ tumors	No
GSE19615	ER status_Pos vs Neg	1.36177	<0.001	All	Yes
GSE19615	Age_>50 vs <=50	0.344828	0.375	ER- tumors	No
GSE19615	Grade_G3 vs G2	0.15056	0.817	ER- tumors	No
GSE19615	HER2 status_Pos vs Neg	0.992768	0.027	ER- tumors	Yes
GSE19615	Lymph node invasion_Yes vs No	1.31615	0.006	ER- tumors	Yes
GSE19615	Metastasis_Yes vs No	0.963474	0.052	ER- tumors	No
GSE19615	Relapse_Yes vs No	0.963474	0.052	ER- tumors	No
GSE19615	Age_>50 vs <=50	-1.32193	0.012	ER+ tumors	Yes
GSE19615	Grade_G2 vs G1	0.918386	0.118	ER+ tumors	No
GSE19615	Grade_G3 vs G1	2.33056	<0.001	ER+ tumors	Yes
GSE19615	Grade_G3 vs G2	1.41143	0.028	ER+ tumors	Yes
GSE19615	Grade_G3-G2 vs G1	1.66903	0.001	ER+ tumors	Yes
GSE19615	HER2 status_Pos vs Neg	1.1635	0.046	ER+ tumors	Yes
GSE19615	Lymph node invasion_Yes vs No	1.5656	0.002	ER+ tumors	Yes
GSE19615	Metastasis_Yes vs No	0.250962	0.898	ER+ tumors	No
GSE19615	PR status_Pos vs Neg	0.941106	0.176	ER+ tumors	No
GSE19615	Relapse_Yes vs No	0.263034	0.856	ER+ tumors	No
GSE20685	Subtype_Luminal B vs Luminal A	1.66448	<0.001	All	Yes
GSE20685	Subtype_Luminal vs Non luminal	2.0321	<0.001	All	Yes
GSE20685	Age_>50 vs <=50	0.124328	0.745	ER- tumors	No
GSE20685	Death_Yes vs No	0.378512	0.379	ER- tumors	No
GSE20685	Lymph node invasion_Yes vs No	0.83996	0.026	ER- tumors	Yes
GSE20685	Metastasis_Yes vs No	0.238787	0.594	ER- tumors	No
GSE20685	Relapse_Yes vs No	1.05658	0.2	ER- tumors	No
GSE20685	Subtype_HER2+ vs Basal	1.95606	<0.001	ER- tumors	Yes
GSE20685	T status_T3,T4 vs T2,T1	1.29866	0.051	ER- tumors	No
GSE20685	Age_>50 vs <=50	-0.268817	0.491	ER+ tumors	No
GSE20685	Death_Yes vs No	0.823749	0.045	ER+ tumors	Yes
GSE20685	Lymph node invasion_Yes vs No	0.432959	0.249	ER+ tumors	No
GSE20685	Metastasis_Yes vs No	0.782409	0.065	ER+ tumors	No
GSE20685	Relapse_Yes vs No	0.575312	0.407	ER+ tumors	No
GSE20685	T status_T3,T4 vs T2,T1	1.17632	0.083	ER+ tumors	No
GSE20711	ER status_Pos vs Neg	1.66903	0.003	All	Yes
GSE20711	Subtype_Luminal B vs Luminal A	2.8953	0.004	All	Yes
GSE20711	Subtype_Luminal vs Non luminal	1.62293	0.003	All	Yes
GSE20711	Death_Yes vs No	0.0143553	0.982	ER- tumors	No
GSE20711	Grade_G3 vs G1	0.695994	0.53	ER- tumors	No
GSE20711	HER2 status_Pos vs Neg	2.43563	<0.001	ER- tumors	Yes
GSE20711	Lymph node invasion_Yes vs No	1.29278	0.028	ER- tumors	Yes
GSE20711	Relapse_Yes vs No	0.0703893	0.917	ER- tumors	No
GSE20711	Subtype_HER2+ vs Basal	2.8953	<0.001	ER- tumors	Yes
GSE20711	Death_Yes vs No	-0.268817	0.83	ER+ tumors	No
GSE20711	Grade_G3 vs G1	1.79909	0.035	ER+ tumors	Yes
GSE20711	HER2 status_Pos vs Neg	1.02148	0.346	ER+ tumors	No
GSE20711	Lymph node invasion_Yes vs No	-0.340075	0.723	ER+ tumors	No
GSE20711	Relapse_Yes vs No	-0.358454	0.726	ER+ tumors	No
GSE21653	ER status_Pos vs Neg	2.32193	<0.001	All	Yes
GSE21653	Subtype_Luminal B vs Luminal A	1.33342	0.012	All	Yes
GSE21653	Subtype_Luminal vs Non luminal	2.02148	<0.001	All	Yes
GSE21653	Age_>50 vs <=50	-0.0291463	0.92	ER- tumors	No
GSE21653	Grade_G2 vs G1	1	0.029	ER- tumors	Yes
GSE21653	Grade_G3 vs G1	0.189034	0.22	ER- tumors	No
GSE21653	Grade_G3 vs G2	-0.810966	0.075	ER- tumors	No
GSE21653	Grade_G3-G2 vs G1	0.389567	0.03	ER- tumors	Yes
GSE21653	HER2 status_Pos vs Neg	0.238787	0.404	ER- tumors	No
GSE21653	Ki67 High_Pos vs Neg	-1.51457	0.118	ER- tumors	No
GSE21653	Lymph node invasion_Yes vs No	0.0565835	0.824	ER- tumors	No
GSE21653	P53 IHC_Pos vs Neg	-0.251539	0.408	ER- tumors	No
GSE21653	PR status_Pos vs Neg	-0.415037	0.068	ER- tumors	No
GSE21653	Subtype_HER2+ vs Basal	1.26303	0.008	ER- tumors	Yes
GSE21653	T status_T3 vs T2,T1	-0.184425	0.449	ER- tumors	No
GSE21653	Age_>50 vs <=50	0.545968	0.231	ER+ tumors	No
GSE21653	Death_Yes vs No	0.124328	0.806	ER+ tumors	No
GSE21653	Grade_G2 vs G1	0.575312	0.315	ER+ tumors	No
GSE21653	Grade_G3 vs G1	0.485427	0.438	ER+ tumors	No
GSE21653	Grade_G3 vs G2	-0.0892673	0.865	ER+ tumors	No
GSE21653	Grade_G3-G2 vs G1	0.536053	0.312	ER+ tumors	No
GSE21653	HER2 status_Pos vs Neg	0.485427	0.407	ER+ tumors	No
GSE21653	Ki67 High_Pos vs Neg	1.25701	0.014	ER+ tumors	Yes
GSE21653	Lymph node invasion_Yes vs No	0.400538	0.378	ER+ tumors	No
GSE21653	P53 IHC_Pos vs Neg	0.443607	0.469	ER+ tumors	No
GSE21653	PR status_Pos vs Neg	0.956057	0.129	ER+ tumors	No
GSE23593	ER status_Pos vs Neg	3.10098	<0.001	All	Yes
GSE23593	PR status_Pos vs Neg	-0.136062	0.518	ER- tumors	No
GSE23593	Grade_G2 vs G1	2.57046	<0.001	ER+ tumors	Yes
GSE23593	Grade_G3 vs G1	4.56621	0.001	ER+ tumors	Yes
GSE23593	Grade_G3 vs G2	1.99639	0.082	ER+ tumors	No
GSE23593	Grade_G3-G2 vs G1	3.21723	<0.001	ER+ tumors	Yes
GSE23593	PR status_Pos vs Neg	-0.268817	0.776	ER+ tumors	No
GSE23720	ER status_Pos vs Neg	2.50843	<0.001	All	Yes
GSE23720	Age_>50 vs <=50	-0.304006	0.377	ER- tumors	No
GSE23720	PR status_Pos vs Neg	-0.473931	0.118	ER- tumors	No
GSE23720	Age_>50 vs <=50	0.0703893	0.886	ER+ tumors	No
GSE23720	PR status_Pos vs Neg	0.956057	0.175	ER+ tumors	No
GSE26639	ER status_Pos vs Neg	1.9782	<0.001	All	Yes
GSE26639	Grade_G3 vs G2	-2.47393	0.008	ER- tumors	Yes
GSE26639	HER2 status_Pos vs Neg	0.389567	0.453	ER- tumors	No
GSE26639	PR status_Pos vs Neg	2.6017	0.281	ER- tumors	No
GSE26639	Grade_G2 vs G1	0.713696	0.427	ER+ tumors	No
GSE26639	Grade_G3 vs G1	1.48027	0.112	ER+ tumors	No
GSE26639	Grade_G3 vs G2	0.765535	0.237	ER+ tumors	No
GSE26639	Grade_G3-G2 vs G1	1.07724	0.21	ER+ tumors	No
GSE26639	HER2 status_Pos vs Neg	0.722466	0.25	ER+ tumors	No
GSE26639	PR status_Pos vs Neg	-0.535332	0.379	ER+ tumors	No
GSE29044	ER status_Pos vs Neg	2.46467	<0.001	All	Yes
GSE29044	Histology_Tumor vs Normal	2.72465	<0.001	All	Yes
GSE29044	HER2 status_Pos vs Neg	0.275007	0.174	ER- tumors	No
GSE29044	PR status_Pos vs Neg	-0.200913	0.244	ER- tumors	No
GSE29044	Grade_G2 vs G1	-5.64386	0.012	ER+ tumors	Yes
GSE29044	Grade_G3 vs G1	-6.64386	0.006	ER+ tumors	Yes
GSE29044	Grade_G3 vs G2	-0.473931	0.558	ER+ tumors	No
GSE29044	Grade_G3-G2 vs G1	-5.64386	0.015	ER+ tumors	Yes
GSE29044	HER2 status_Pos vs Neg	-0.37707	0.653	ER+ tumors	No
GSE29044	PR status_Pos vs Neg	1.77821	0.031	ER+ tumors	Yes
GSE31448	ER status_Pos vs Neg	2.44361	<0.001	All	Yes
GSE31448	Subtype_HER2+ vs Basal	2.03562	<0.001	All	Yes
GSE31448	Subtype_Luminal B vs Luminal A	1.12433	0.01	All	Yes
GSE31448	Subtype_Luminal vs Non luminal	2.13422	<0.001	All	Yes
GSE31448	Age_>50 vs <=50	0.0285692	0.915	ER- tumors	No
GSE31448	Grade_G2 vs G1	1	0.029	ER- tumors	Yes
GSE31448	Grade_G3 vs G1	0.201634	0.202	ER- tumors	No
GSE31448	Grade_G3 vs G2	-0.785875	0.078	ER- tumors	No
GSE31448	Grade_G3-G2 vs G1	-0.556393	0.117	ER- tumors	No
GSE31448	HER2 status_Pos vs Neg	0.298658	0.24	ER- tumors	No
GSE31448	Ki67 High_Pos vs Neg	-1.51457	0.119	ER- tumors	No
GSE31448	Lymph node invasion_Yes vs No	0.0976108	0.628	ER- tumors	No
GSE31448	P53 IHC_Pos vs Neg	-0.251539	0.408	ER- tumors	No
GSE31448	PR status_Pos vs Neg	-0.415037	0.064	ER- tumors	No
GSE31448	Relapse_Yes vs No	-0.217591	0.331	ER- tumors	No
GSE31448	T status_T3 vs T2,T1	-0.0588937	0.795	ER- tumors	No
GSE31448	Age_>50 vs <=50	0.695994	0.125	ER+ tumors	No
GSE31448	Grade_G2 vs G1	0.565597	0.317	ER+ tumors	No
GSE31448	Grade_G3 vs G1	0.475085	0.441	ER+ tumors	No
GSE31448	Grade_G3 vs G2	-0.0892673	0.866	ER+ tumors	No
GSE31448	Grade_G3-G2 vs G1	0.111031	0.815	ER+ tumors	No
GSE31448	HER2 status_Pos vs Neg	0.632268	0.413	ER+ tumors	No
GSE31448	Ki67 High_Pos vs Neg	1.25701	0.014	ER+ tumors	Yes
GSE31448	Lymph node invasion_Yes vs No	0.400538	0.38	ER+ tumors	No
GSE31448	P53 IHC_Pos vs Neg	0.443607	0.466	ER+ tumors	No
GSE31448	PR status_Pos vs Neg	0.956057	0.129	ER+ tumors	No
GSE31448	Relapse_Yes vs No	0.124328	0.808	ER+ tumors	No
GSE31448	T status_T3 vs T2,T1	0.575312	0.329	ER+ tumors	No
GSE32646	ER status_Pos vs Neg	2.61117	<0.001	All	Yes
GSE32646	Grade_G3 vs G2	-1.18442	0.12	ER- tumors	No
GSE32646	HER2 status_Pos vs Neg	2.10098	0.002	ER- tumors	Yes
GSE32646	Lymph node invasion_Yes vs No	0.333424	0.681	ER- tumors	No
GSE32646	Age_>50 vs <=50	0.757023	0.298	ER+ tumors	No
GSE32646	Grade_G2 vs G1	-0.943416	0.391	ER+ tumors	No
GSE32646	Grade_G2 vs G1	0.411426	0.62	ER+ tumors	No
GSE32646	Grade_G3 vs G1	-0.514573	0.655	ER+ tumors	No
GSE32646	Grade_G3-G2 vs G1	0.321928	0.686	ER+ tumors	No
GSE32646	HER2 status_Pos vs Neg	0.367371	0.618	ER+ tumors	No
GSE32646	Lymph node invasion_Yes vs No	-0.0740006	0.92	ER+ tumors	No
GSE32646	PR status_Pos vs Neg	-0.915936	0.213	ER+ tumors	No
GSE32646	T status_T3,T4 vs T2,T1	-0.321928	0.685	ER+ tumors	No
GSE36771	ER status_Pos vs Neg	2.10434	<0.001	All	Yes
GSE36771	Lymph node invasion_Yes vs No	0.356144	0.501	ER- tumors	No
GSE36771	Grade_G2 vs G1	1.02148	0.099	ER+ tumors	No
GSE36771	Grade_G3 vs G1	1.15704	0.113	ER+ tumors	No
GSE36771	Grade_G3 vs G2	1.15704	0.113	ER+ tumors	No
GSE36771	Grade_G3-G2 vs G1	1.07724	0.066	ER+ tumors	No
GSE36771	Lymph node invasion_Yes vs No	1.02148	0.066	ER+ tumors	No
GSE36771	PR status_Pos vs Neg	1.26903	0.17	ER+ tumors	No
GSE36774	ER status_Pos vs Neg	2.10434	<0.001	All	Yes
GSE36774	Lymph node invasion_Yes vs No	0.356144	0.501	ER- tumors	No
GSE36774	Grade_G2 vs G1	1.02148	0.099	ER+ tumors	No
GSE36774	Grade_G3 vs G1	1.15704	0.113	ER+ tumors	No
GSE36774	Grade_G3 vs G2	0.137504	0.832	ER+ tumors	No
GSE36774	Grade_G3-G2 vs G1	1.07724	0.066	ER+ tumors	No
GSE36774	Lymph node invasion_Yes vs No	1.02148	0.066	ER+ tumors	No
GSE36774	PR status_Pos vs Neg	1.26903	0.17	ER+ tumors	No
GSE42568	ER status_Pos vs Neg	1.96347	<0.001	All	Yes
GSE42568	Histology_Tumor vs Normal	1.4957	<0.001	All	Yes
GSE42568	Age_>50 vs <=50	-0.136062	0.843	ER- tumors	No
GSE42568	Death_Yes vs No	-0.761213	0.148	ER- tumors	No
GSE42568	Grade_G3 vs G2	-0.37707	0.663	ER- tumors	No
GSE42568	Lymph node invasion_Yes vs No	-0.643856	0.33	ER- tumors	No
GSE42568	Relapse_Yes vs No	-0.810966	0.282	ER- tumors	No
GSE42568	Age_>50 vs <=50	-0.535332	0.505	ER+ tumors	No
GSE42568	Death_Yes vs No	2.12102	0.018	ER+ tumors	Yes
GSE42568	Grade_G2 vs G1	1.99639	0.053	ER+ tumors	No
GSE42568	Grade_G3 vs G1	1.64155	0.103	ER+ tumors	No
GSE42568	Grade_G3 vs G2	-0.358454	0.671	ER+ tumors	No
GSE42568	Grade_G3-G2 vs G1	1.81967	0.056	ER+ tumors	No
GSE42568	Lymph node invasion_Yes vs No	1.03562	0.174	ER+ tumors	No
GSE42568	Relapse_Yes vs No	2.06695	0.014	ER+ tumors	Yes
GSE43358	ER status_Pos vs Neg	2.41414	<0.001	All	Yes
GSE43358	Grade_G3 vs G2	-0.104697	0.639	ER- tumors	No
GSE43358	HER2 status_Pos vs Neg	0.31034	0.434	ER- tumors	No
GSE43358	Grade_G2 vs G1	0.748461	0.521	ER+ tumors	No
GSE43358	Grade_G3 vs G1	2.0036	0.027	ER+ tumors	Yes
GSE43358	Grade_G3 vs G2	1.25701	0.313	ER+ tumors	No
GSE43358	Grade_G3-G2 vs G1	1.774	0.031	ER+ tumors	Yes
GSE43358	HER2 status_Pos vs Neg	0.948601	0.273	ER+ tumors	No
GSE43358	PR status_Pos vs Neg	0.933573	0.26	ER+ tumors	No
GSE43365	ER status_Pos vs Neg	1.59932	0.002	All	Yes
GSE43365	Age_>50 vs <=50	0.879706	0.236	ER- tumors	No
GSE43365	Grade_G3 vs G2	1.11103	0.089	ER- tumors	No
GSE43365	HER2 status_Pos vs Neg	1.4957	0.136	ER- tumors	No
GSE43365	Lymph node invasion_Yes vs No	3.49313	0.276	ER- tumors	No
GSE43365	Menopause_Post vs Pre	0.83996	0.265	ER- tumors	No
GSE43365	Age_>50 vs <=50	-0.473931	0.442	ER+ tumors	No
GSE43365	Grade_G2 vs G1	1.10434	0.1	ER+ tumors	No
GSE43365	Grade_G3 vs G1	1.74846	0.031	ER+ tumors	Yes
GSE43365	Grade_G3 vs G2	0.641546	0.385	ER+ tumors	No
GSE43365	Grade_G3-G2 vs G1	1.30451	0.04	ER+ tumors	Yes
GSE43365	HER2 status_Pos vs Neg	2.49057	0.031	ER+ tumors	Yes
GSE43365	Lymph node invasion_Yes vs No	0.344828	0.61	ER+ tumors	No
GSE43365	Menopause_Post vs Pre	-0.152003	0.787	ER+ tumors	No
GSE43365	PR status_Pos vs Neg	0.344828	0.653	ER+ tumors	No
GSE45827	Histology_Tumor vs Normal	1.15056	<0.001	All	Yes
GSE45827	Subtype_HER2+ vs Basal	0.411426	0.234	All	No
GSE45827	Subtype_Luminal B vs Luminal A	2.09085	0.013	All	Yes
GSE45827	Subtype_Luminal vs Non luminal	1.91073	<0.001	All	Yes
GSE47109	ER status_Pos vs Neg	2.27202	0.097	All	No
GSE47109	Grade_G2 vs G1	0.475085	0.272	ER+ tumors	No
GSE47109	Grade_G3 vs G1	1.13093	0.037	ER+ tumors	Yes
GSE47109	Grade_G3 vs G2	0.659925	0.185	ER+ tumors	No
GSE47109	Grade_G3-G2 vs G1	0.659925	0.103	ER+ tumors	No
GSE50948	ER status_Pos vs Neg	1.0072	0.001	All	Yes
GSE50948	Age_>50 vs <=50	0.15056	0.463	ER- tumors	No
GSE50948	Grade_G3 vs G2	-0.340075	0.207	ER- tumors	No
GSE50948	HER2 status_Pos vs Neg	-0.120294	0.775	ER- tumors	No
GSE50948	Menopause_Post vs Pre	-0.152003	0.451	ER- tumors	No
GSE50948	PR status_Pos vs Neg	0.0565835	0.914	ER- tumors	No
GSE50948	Age_>50 vs <=50	-1.08927	0.05	ER+ tumors	No
GSE50948	Grade_G3 vs G2	0.111031	0.855	ER+ tumors	No
GSE50948	HER2 status_Pos vs Neg	-0.200913	0.715	ER+ tumors	No
GSE50948	Menopause_Post vs Pre	-0.599462	0.296	ER+ tumors	No
GSE50948	PR status_Pos vs Neg	0.604071	0.275	ER+ tumors	No
GSE54002	Histology_Tumor vs Normal	2.60644	<0.001	All	Yes
GSE5460	ER status_Pos vs Neg	2.0072	<0.001	All	Yes
GSE5460	Grade_G3 vs G2	-0.104697	0.899	ER- tumors	No
GSE5460	HER2 status_Pos vs Neg	2.06695	0.001	ER- tumors	Yes
GSE5460	Lymph node invasion_Yes vs No	1.22651	0.022	ER- tumors	Yes
GSE5460	Grade_G2 vs G1	2.07039	0.004	ER+ tumors	Yes
GSE5460	Grade_G3 vs G1	3.34767	<0.001	ER+ tumors	Yes
GSE5460	Grade_G3 vs G2	1.27501	0.09	ER+ tumors	No
GSE5460	Grade_G3-G2 vs G1	2.64386	<0.001	ER+ tumors	Yes
GSE5460	HER2 status_Pos vs Neg	0.956057	0.133	ER+ tumors	No
GSE5460	Lymph node invasion_Yes vs No	2.59932	<0.001	ER+ tumors	Yes
GSE58984	ER status_Pos vs Neg	1.68706	<0.001	All	Yes
GSE58984	Age_>50 vs <=50	-0.736966	0.276	ER- tumors	No
GSE58984	Lymph node invasion_Yes vs No	0.238787	0.732	ER- tumors	No
GSE58984	Metastasis_Yes vs No	-0.415037	0.462	ER- tumors	No
GSE58984	Age_>50 vs <=50	-1.4344	0.012	ER+ tumors	Yes
GSE58984	Lymph node invasion_Yes vs No	0.298658	0.616	ER+ tumors	No
GSE58984	Metastasis_Yes vs No	0.111031	0.926	ER+ tumors	No
GSE58984	PR status_Pos vs Neg	0.0976108	0.897	ER+ tumors	No
GSE61304	ER status_Pos vs Neg	1.95606	<0.001	All	Yes
GSE61304	Histology_Tumor vs Normal	1.95233	<0.001	All	Yes
GSE61304	Histology_Tumor vs Normal	1.95233	<0.001	All	Yes
GSE61304	Age_>50 vs <=50	-0.340075	0.635	ER- tumors	No
GSE61304	Grade_G3 vs G2	1.93734	0.495	ER- tumors	No
GSE61304	Lymph node invasion_Yes vs No	-0.535332	0.5	ER- tumors	No
GSE61304	Metastasis_Yes vs No	-0.168123	0.814	ER- tumors	No
GSE61304	Age_>50 vs <=50	0.344828	0.764	ER+ tumors	No
GSE61304	Death_Yes vs No	0.485427	0.708	ER+ tumors	No
GSE61304	Grade_G2 vs G1	2	0.148	ER+ tumors	No
GSE61304	Grade_G3 vs G1	2.39232	0.098	ER+ tumors	No
GSE61304	Lymph node invasion_Yes vs No	-0.785875	0.314	ER+ tumors	No
GSE61304	Metastasis_Yes vs No	1.58496	0.142	ER+ tumors	No
GSE61304	PR status_Pos vs Neg	0.124328	0.904	ER+ tumors	No
GSE6532	Age_>50 vs <=50	-0.836501	0.459	ER+ tumors	No
GSE6532	Grade_G2 vs G1	2.21412	0.002	ER+ tumors	Yes
GSE6532	Grade_G3 vs G1	4.05485	<0.001	ER+ tumors	Yes
GSE6532	Grade_G3 vs G2	1.83996	0.067	ER+ tumors	No
GSE6532	Grade_G3-G2 vs G1	2.76977	<0.001	ER+ tumors	Yes
GSE6532	Lymph node invasion_Yes vs No	0.555816	0.457	ER+ tumors	No
GSE6532	Metastasis_Yes vs No	1.80735	0.015	ER+ tumors	Yes
GSE6532	PR status_Pos vs Neg	0.0143553	0.982	ER+ tumors	No
GSE6532	Relapse_Yes vs No	1.80735	0.015	ER+ tumors	Yes
GSE71258	ER status_Pos vs Neg	2.08746	<0.001	All	Yes
GSE71258	HER2 status_Pos vs Neg	0.731183	0.229	ER- tumors	No
GSE71258	Menopause_Post vs Pre	0.731183	0.147	ER- tumors	No
GSE71258	HER2 status_Pos vs Neg	0.704872	0.491	ER+ tumors	No
GSE71258	Menopause_Post vs Pre	0.790772	0.311	ER+ tumors	No
GSE71258	PR status_Pos vs Neg	-0.621488	0.482	ER+ tumors	No
GSE76275	ER status_Pos vs Neg	2.48285	<0.001	All	Yes
GSE76275	Subtype_Luminal vs Non luminal	2.09761	<0.001	All	Yes
GSE76275	Age_>50 vs <=50	0.15056	0.467	ER- tumors	No
GSE76275	Grade_G3-G2 vs G1	-0.168123	0.832	ER- tumors	No
GSE76275	HER2 status_Pos vs Neg	0.992768	0.044	ER- tumors	Yes
GSE76275	Lymph node invasion_Yes vs No	0.411426	0.07	ER- tumors	No
GSE76275	Menopause_Post vs Pre	0.163499	0.506	ER- tumors	No
GSE76275	T status_T3,T4 vs T2,T1	-0.286304	0.22	ER- tumors	No
GSE76275	Age_>50 vs <=50	-0.358454	0.706	ER+ tumors	No
GSE76275	HER2 status_Pos vs Neg	-1.152	0.521	ER+ tumors	No
GSE76275	Lymph node invasion_Yes vs No	1.26303	0.224	ER+ tumors	No
GSE76275	Menopause_Post vs Pre	-0.666576	0.597	ER+ tumors	No
GSE76275	PR status_Pos vs Neg	-1.35845	0.304	ER+ tumors	No
GSE76275	T status_T3,T4 vs T2,T1	-1	0.556	ER+ tumors	No
GSE88770	ER status_Pos vs Neg	0.286881	0.654	All	No
GSE88770	Death_Yes vs No	0	0.998	ER- tumors	No
GSE88770	Grade_G2 vs G1	-0.785875	0.569	ER- tumors	No
GSE88770	HER2 status_Pos vs Neg	0.815575	0.708	ER- tumors	No
GSE88770	Lymph node invasion_Yes vs No	-0.862496	0.459	ER- tumors	No
GSE88770	PR status_Pos vs Neg	2.26303	0.076	ER- tumors	No
GSE88770	Death_Yes vs No	-0.454032	0.342	ER+ tumors	No
GSE88770	Grade_G2 vs G1	-0.136062	0.866	ER+ tumors	No
GSE88770	Grade_G3 vs G1	0.956057	0.452	ER+ tumors	No
GSE88770	Grade_G3 vs G2	1.09761	0.296	ER+ tumors	No
GSE88770	Grade_G3-G2 vs G1	-0.0588937	0.941	ER+ tumors	No
GSE88770	HER2 status_Pos vs Neg	1.99639	0.217	ER+ tumors	No
GSE88770	Lymph node invasion_Yes vs No	0.584963	0.206	ER+ tumors	No
GSE88770	PR status_Pos vs Neg	0.650765	0.157	ER+ tumors	No
GSE88770	Relapse_Yes vs No	0.214125	0.691	ER+ tumors	No
TCGA	ER status_Pos vs Neg	3.17169	<0.001	All	Yes
TCGA	Subtype_HER2+ vs Basal	8.13391	<0.001	All	Yes
TCGA	Subtype_Luminal B vs Luminal A	0.83996	<0.001	All	Yes
TCGA	Subtype_Luminal vs Non luminal	2.76553	<0.001	All	Yes
TCGA	Age_>50 vs <=50	0.773996	0.491	ER- tumors	No
TCGA	Death_Yes vs No	2.29866	0.496	ER- tumors	No
TCGA	HER2 status_Pos vs Neg	9.90195	0.002	ER- tumors	Yes
TCGA	Lymph node invasion_Yes vs No	1.60407	0.079	ER- tumors	No
TCGA	Menopause_Post vs Pre	0.879706	0.8851	ER- tumors	No
TCGA	PR status_Pos vs Neg	0.189034	0.027	ER- tumors	Yes
TCGA	Relapse_Yes vs No	-0.37707	0.737	ER- tumors	No
TCGA	Subtype_HER2+ vs Basal	5.59	<0.001	ER- tumors	Yes
TCGA	T status_T3,T4 vs T2,T1	0.432959	0.04	ER- tumors	Yes
TCGA	Age_>50 vs <=50	-0.0439433	0.494	ER+ tumors	No
TCGA	Death_Yes vs No	-0.666576	0.28	ER+ tumors	No
TCGA	HER2 status_Pos vs Neg	0.15056	0.934	ER+ tumors	No
TCGA	Lymph node invasion_Yes vs No	0.286881	0.063	ER+ tumors	No
TCGA	Menopause_Post vs Pre	0.189034	0.087	ER+ tumors	No
TCGA	Metastasis_Yes vs No	-0.514573	0.694	ER+ tumors	No
TCGA	PR status_Pos vs Neg	0.62293	0.34	ER+ tumors	No
TCGA	Relapse_Yes vs No	0.238787	0.67	ER+ tumors	No
TCGA	T status_T3,T4 vs T2,T1	0.0285692	0.707	ER+ tumors	No

## Sheet: e_Survival analyses
Dataset	Compared groups	HR	log2(HR)	p-value	Analysed samples
GSE6532	RFS_High DSCAM-AS1 vs Low DSCAM-AS1	3.21	1.68257	0.0048	ER+ tumors
GSE42568	OS_High DSCAM-AS1 vs Low DSCAM-AS1	3.47	1.79494	0.0193	ER+ tumors
GSE20685	OS_High DSCAM-AS1 vs Low DSCAM-AS1	1.96	0.970854	0.022	ER+ tumors
GSE20685	RFS_High DSCAM-AS1 vs Low DSCAM-AS1	1.9	0.925999	0.023	ER+ tumors
GSE42568	RFS_High DSCAM-AS1 vs Low DSCAM-AS1	2.6	1.37851	0.0272	ER+ tumors
GSE42568	RFS_High DSCAM-AS1 vs Low DSCAM-AS1	0.53	-0.915936	0.1468	ER- tumors
GSE61304	OS_High DSCAM-AS1 vs Low DSCAM-AS1	2.09	1.0635	0.1906	ER- tumors
TCGA	OS_High DSCAM-AS1 vs Low DSCAM-AS1	0.73	-0.454032	0.31	ER- tumors
GSE58984	DMFS_High DSCAM-AS1 vs Low DSCAM-AS1	2.84	1.50589	0.3449	ER+ tumors
GSE88770	RFS_High DSCAM-AS1 vs Low DSCAM-AS1	1.45	0.536053	0.3722	ER+ tumors
GSE61304	OS_High DSCAM-AS1 vs Low DSCAM-AS1	1.99	0.992768	0.4424	ER+ tumors
GSE20711	RFS_High DSCAM-AS1 vs Low DSCAM-AS1	1.44	0.526069	0.4446	ER- tumors
GSE21653	OS_High DSCAM-AS1 vs Low DSCAM-AS1	1.27	0.344828	0.448	ER- tumors
GSE17907	MFS_High DSCAM-AS1 vs Low DSCAM-AS1	0.63	-0.666576	0.4624	ER- tumors
GSE20711	RFS_High DSCAM-AS1 vs Low DSCAM-AS1	0.71	-0.494109	0.5263	ER+ tumors
GSE20711	OS_High DSCAM-AS1 vs Low DSCAM-AS1	1.42	0.505891	0.5284	ER- tumors
TCGA	OS_High DSCAM-AS1 vs Low DSCAM-AS1	0.92	-0.120294	0.69	ER+ tumors
GSE31448	OS_High DSCAM-AS1 vs Low DSCAM-AS1	1.12	0.163499	0.7186	ER- tumors
GSE42568	OS_High DSCAM-AS1 vs Low DSCAM-AS1	1.18	0.238787	0.7553	ER- tumors
GSE20685	MFS_High DSCAM-AS1 vs Low DSCAM-AS1	0.9	-0.152003	0.7796	ER- tumors
GSE88770	OS_High DSCAM-AS1 vs Low DSCAM-AS1	1.11	0.15056	0.8113	ER+ tumors
GSE21653	OS_High DSCAM-AS1 vs Low DSCAM-AS1	0.93	-0.104697	0.8126	ER+ tumors
GSE31448	OS_High DSCAM-AS1 vs Low DSCAM-AS1	0.93	-0.104697	0.8126	ER+ tumors
GSE58984	DMFS_High DSCAM-AS1 vs Low DSCAM-AS1	1.18	0.238787	0.8291	ER- tumors
GSE20685	OS_High DSCAM-AS1 vs Low DSCAM-AS1	1.07	0.0976108	0.8499	ER- tumors
GSE20711	OS_High DSCAM-AS1 vs Low DSCAM-AS1	0.88	-0.184425	0.853	ER+ tumors
TCGA	DFS_High DSCAM-AS1 vs Low DSCAM-AS1	1.04	0.0565835	0.9	ER- tumors
GSE17907	MFS_High DSCAM-AS1 vs Low DSCAM-AS1	0.92	-0.120294	0.933	ER+ tumors
TCGA	DFS_High DSCAM-AS1 vs Low DSCAM-AS1	1	0	0.99	ER+ tumors
