# Supplementary material
Source: Preprints.org preprint supplement (doi:10.20944/preprints202004.0323.v1)
Supplement: Supplementary file 1 [file supplementary › Supplementary_Table_2_Gene_level_DESeq2_differential_analysis.xlsx]

## Sheet: RSEM_LNA_genes_all_info
	Ensembl v90 annotations			Average length (Control LNA)			Average length (DSCAM-AS1 LNA)			Normalized read counts (Control LNA)			Normalized read counts (DSCAM-AS1 LNA)			TPM (Control LNA)			TPM (DSCAM-AS1 LNA)			Gene level DE analysis RSEM-DESeq2
Gene ID	Gene name	Gene type	Gene description	Rep1	Rep2	Rep3	Rep1	Rep2	Rep3	Rep1	Rep2	Rep3	Rep1	Rep2	Rep3	Rep1	Rep2	Rep3	Rep1	Rep2	Rep3	baseMean	log2FoldChange	lfcSE	stat	pvalue	padj
ENSG00000235123.5	DSCAM-AS1	antisense_RNA	DSCAM antisense RNA 1 [Source:HGNC Symbol;Acc:HGNC:40197]	1025.13	1017.39	1016.21	1028.4	1028.12	1022.43	24163.8	26034.8	23704.9	8003.11	7635.56	7234.52	1194.49	1263.11	1147.41	397.12	373.22	350.32	16129.7	-1.69225	0.0631572	-26.7943	3.77009e-158	4.95163e-154
ENSG00000151276.23	MAGI1	protein_coding	membrane associated guanylate kinase, WW and PDZ domain containing 1 [Source:HGNC Symbol;Acc:HGNC:946]	3534.73	3620.13	3729.52	3382.15	3682.53	3646.75	1494.48	1334.21	1430.41	522.237	404.886	419.791	21.01	18.41	19.69	7.37	5.63	5.79	934.193	-1.66163	0.108874	-15.262	1.37005e-52	8.9971e-49
ENSG00000010404.17	IDS	protein_coding	iduronate 2-sulfatase [Source:HGNC Symbol;Acc:HGNC:5389]	3021.41	3178.14	3358.53	3369.88	3439.6	2924.76	1882.84	1926.9	1732.98	814.525	727.043	806.704	29.65	29.8	26.73	12.87	11.33	12.46	1315.2	-1.23607	0.0872036	-14.1746	1.31671e-45	5.76456e-42
ENSG00000159086.14	PAXBP1	protein_coding	PAX3 and PAX7 binding protein 1 [Source:HGNC Symbol;Acc:HGNC:13579]	2988.51	3115.48	3222.16	3239.17	3148.37	3155.89	1083.13	1135.32	962.432	447.335	413.864	388.117	17.43	17.92	15.16	7.22	6.58	6.12	738.37	-1.34866	0.108732	-12.4036	2.49889e-35	8.20511e-32
ENSG00000182621.17	PLCB1	protein_coding	phospholipase C beta 1 [Source:HGNC Symbol;Acc:HGNC:15917]	3694	3641.41	3616.25	3616.07	3767.91	3241.26	1764.86	2037.49	2124.57	918.883	790.239	935.962	24.84	28.15	29.27	12.99	11	12.92	1428.52	-1.16054	0.0982811	-11.8083	3.53529e-32	9.2865e-29
ENSG00000132746.14	ALDH3B2	protein_coding	aldehyde dehydrogenase 3 family member B2 [Source:HGNC Symbol;Acc:HGNC:411]	2142.41	2183.01	2216.86	2222.15	2254.98	2239.05	621.414	481.622	543.422	1277.57	1361.97	1612.75	14.23	10.83	12.18	29.36	30.83	36.15	983.113	1.36834	0.117026	11.6926	1.39049e-31	3.04379e-28
ENSG00000176788.8	BASP1	protein_coding	brain abundant membrane attached signal protein 1 [Source:HGNC Symbol;Acc:HGNC:957]	1695.97	1674.25	1681.55	1687.89	1691.52	1688.93	1435.17	1506.66	1513.94	2526.14	2585.64	2624.88	43.03	44.33	44.44	76.02	76.65	77.09	2032.05	0.796346	0.0697047	11.4246	3.15224e-30	5.9145e-27
ENSG00000054965.10	FAM168A	protein_coding	family with sequence similarity 168 member A [Source:HGNC Symbol;Acc:HGNC:28999]	5446.4	5857.74	5852.65	5788.77	5715.58	5578.12	3522.36	3203.1	3115.43	1924.76	1790.29	1887.76	31.23	27.87	27.05	17.13	15.69	16.39	2574.02	-0.811934	0.0745634	-10.8892	1.298e-27	2.131e-24
ENSG00000103485.17	QPRT	protein_coding	quinolinate phosphoribosyltransferase [Source:HGNC Symbol;Acc:HGNC:9755]	2051.11	2113.44	2024.77	2031.55	1976.04	1997.39	2068.63	1748.33	1870.35	3446.09	3265.55	3523.84	51.47	42.7	45.58	86.09	80.35	85.9	2653.78	0.847601	0.0782628	10.8302	2.47649e-27	3.61402e-24
ENSG00000189334.8	S100A14	protein_coding	S100 calcium binding protein A14 [Source:HGNC Symbol;Acc:HGNC:18901]	877.461	870.632	875.876	876.381	876.278	873.944	1672.88	1859.68	1786.99	3011.28	3249.38	2965.54	96.67	105.47	101.11	174.67	185.66	167.86	2424.27	0.79408	0.0741803	10.7047	9.67106e-27	1.2702e-23
ENSG00000163131.10	CTSS	protein_coding	cathepsin S [Source:HGNC Symbol;Acc:HGNC:2545]	1096.67	1139.93	1062.36	1050.39	1049.1	1165.72	90.1823	112.993	96.0557	349.95	410.815	316.318	4.18	5.13	4.35	16.26	18.8	14.34	229.415	1.84765	0.176777	10.4518	1.4372e-25	1.71601e-22
ENSG00000164808.16	SPIDR	protein_coding	scaffolding protein involved in DNA repair [Source:HGNC Symbol;Acc:HGNC:28971]	1626.31	1546.15	1685.06	1638.03	1419.87	1968.35	1865.76	1930.28	1760.77	885.884	989.574	723.717	57.56	58.44	53.19	27.44	30.19	21.87	1359.33	-1.10426	0.106538	-10.3649	3.58121e-25	3.91963e-22
ENSG00000130396.20	AFDN	protein_coding	afadin, adherens junction formation factor [Source:HGNC Symbol;Acc:HGNC:7137]	3635.71	3499.06	3548.39	3334.67	3596.08	3736.12	2555.75	2739.39	2526.87	1552.44	1390.59	1257.89	36.34	38.24	35.18	22.16	19.54	17.52	2003.93	-0.898947	0.0874348	-10.2813	8.5527e-25	8.64086e-22
ENSG00000196542.8	SPTSSB	protein_coding	serine palmitoyltransferase small subunit B [Source:HGNC Symbol;Acc:HGNC:24045]	1418.11	1415.17	1494.75	1372.22	1303.7	1327.4	8667.54	9836.14	8743.65	14187.8	15052.1	13866.4	315.97	351.92	312.11	519.17	542.58	495.18	11725.6	0.661825	0.0671196	9.86039	6.18109e-23	5.79875e-20
ENSG00000204525.16	HLA-C	protein_coding	major histocompatibility complex, class I, C [Source:HGNC Symbol;Acc:HGNC:4933]	1257.45	1256.16	1264.14	1270.11	1251.26	1261.64	5131.74	4832.69	4348.11	8091.25	7938.58	7332.35	205.93	190.36	170.87	325.95	314.99	288.22	6279.08	0.706744	0.0741452	9.53189	1.54439e-21	1.35227e-18
ENSG00000185499.16	MUC1	protein_coding	mucin 1, cell surface associated [Source:HGNC Symbol;Acc:HGNC:7508]	1260.37	1269.39	1354.9	1297.87	1179.49	1191.83	1082.37	920.4	867.22	1710.32	1921.07	1719.32	43.52	36.32	34.16	69.04	76.38	67.73	1370.09	0.897493	0.098086	9.15006	5.69014e-20	4.67089e-17
ENSG00000147689.16	FAM83A	protein_coding	family with sequence similarity 83 member A [Source:HGNC Symbol;Acc:HGNC:28210]	2960.73	2938.76	2824.2	3058.56	3075.51	3023.11	801.071	684.499	757.24	1347.74	1268.19	1426.98	13.59	11.39	12.59	22.96	21.29	23.73	1047.64	0.849978	0.0944556	8.9987	2.2841e-19	1.76467e-16
ENSG00000165731.18	RET	protein_coding	ret proto-oncogene [Source:HGNC Symbol;Acc:HGNC:9967]	4299.94	4177.99	4368.76	4373.19	4391.3	4424.99	2224.7	2771.97	2428.47	1221.47	1466.44	1373.43	25.93	31.7	27.71	14.29	16.89	15.68	1914.47	-0.870715	0.0969185	-8.98399	2.61131e-19	1.90538e-16
ENSG00000173145.11	NOC3L	protein_coding	NOC3 like DNA replication regulator [Source:HGNC Symbol;Acc:HGNC:24034]	2998.38	2988.85	3095.73	3248.85	2947.01	3026.72	1078.4	1191.77	1201.1	671.583	662.771	633.621	17.88	19.39	19.5	11.18	10.87	10.29	906.526	-0.819566	0.093014	-8.8112	1.23808e-18	8.55842e-16
ENSG00000126787.12	DLGAP5	protein_coding	DLG associated protein 5 [Source:HGNC Symbol;Acc:HGNC:16864]	2611.21	2661.4	2636.68	2612.34	2588.95	2628.59	1969.53	2025.7	2090.86	1327.98	1179.34	1089.75	37.97	38.32	39.48	25.7	22.48	20.57	1613.94	-0.760759	0.0876695	-8.67758	4.04286e-18	2.65495e-15
ENSG00000160182.2	TFF1	protein_coding	trefoil factor 1 [Source:HGNC Symbol;Acc:HGNC:11755]	372.65	365.49	368.83	369.84	369.3	369.08	4599.22	5308.12	5012.96	7308.92	9424.88	8454.61	629.95	713.54	672.31	1004.86	1276.42	1134.34	6684.73	0.755338	0.0886883	8.51677	1.64059e-17	1.02607e-14
ENSG00000147041.11	SYTL5	protein_coding	synaptotagmin like 5 [Source:HGNC Symbol;Acc:HGNC:15589]	4542.75	4535.39	4539.06	4539.69	4538.6	4538.34	6347.89	7266.04	6846.06	4597.51	4552.71	3988.89	70.72	79.45	74.68	51.41	50.15	43.53	5599.9	-0.639655	0.0763151	-8.38177	5.21371e-17	3.11258e-14
ENSG00000121552.3	CSTA	protein_coding	cystatin A [Source:HGNC Symbol;Acc:HGNC:2481]	576.079	568.08	570.267	572.375	571.787	570.831	83.4827	161.874	159.807	364.764	511.148	530.771	7.39	14.05	13.84	32.39	44.72	46	301.971	1.79931	0.216509	8.31059	9.52256e-17	5.4378e-14
ENSG00000083720.12	OXCT1	protein_coding	3-oxoacid CoA-transferase 1 [Source:HGNC Symbol;Acc:HGNC:8527]	2694.46	2647.42	2644.19	2377.36	2935.33	2623.03	971.19	996.376	1137.02	622.415	506.332	544.338	18.55	18.66	21.25	11.94	9.56	10.19	796.241	-0.893007	0.110017	-8.11699	4.77886e-16	2.61523e-13
ENSG00000186153.16	WWOX	protein_coding	WW domain containing oxidoreductase [Source:HGNC Symbol;Acc:HGNC:12799]	921.325	881.31	936.235	864.84	805.282	867.722	1274.94	1300.93	1327.77	831.507	804.383	811.132	73.39	73.5	74.84	48.04	45.79	45.73	1058.45	-0.67372	0.0831543	-8.10205	5.40411e-16	2.8391e-13
ENSG00000115464.14	USP34	protein_coding	ubiquitin specific peptidase 34 [Source:HGNC Symbol;Acc:HGNC:20066]	6043.16	5848.34	5719.24	5674.2	4935.18	5614.61	4084.97	4432.22	4657.5	2794.07	3118.26	2804.18	36.71	39.07	40.96	25.2	27.7	24.68	3648.53	-0.597706	0.0750711	-7.96186	1.6947e-15	8.56086e-13
ENSG00000049323.15	LTBP1	protein_coding	latent transforming growth factor beta binding protein 1 [Source:HGNC Symbol;Acc:HGNC:6714]	4931.08	4854.23	4801.6	5070.98	4855.07	4579.18	954.133	1064.44	1070.66	619.148	595.061	608.57	9.95	10.9	10.94	6.48	6.14	6.22	818.672	-0.759915	0.0960421	-7.91231	2.52655e-15	1.22903e-12
ENSG00000188643.10	S100A16	protein_coding	S100 calcium binding protein A16 [Source:HGNC Symbol;Acc:HGNC:20441]	915.448	882.146	898.794	899.065	905.709	894.907	1003.44	1042.99	1113.42	1566.8	1714.23	1821.31	56.42	57.56	61.3	88.44	95.31	100.32	1377.02	0.691585	0.0879787	7.86083	3.81603e-15	1.78999e-12
ENSG00000168394.10	TAP1	protein_coding	transporter 1, ATP binding cassette subfamily B member [Source:HGNC Symbol;Acc:HGNC:43]	2705.82	2683.33	2709.82	2703.31	2721.21	2715.85	3072.45	3175.85	2812.05	4673.64	4910.55	4184.65	57.4	58.24	51.44	87.65	90.72	76.59	3804.87	0.603366	0.0779188	7.74353	9.66914e-15	4.37912e-12
ENSG00000101974.14	ATP11C	protein_coding	ATPase phospholipid transporting 11C [Source:HGNC Symbol;Acc:HGNC:13554]	5065.48	4408.06	4176.14	4572.24	5118.77	4411.67	1827.24	2219.29	2443.49	1261.52	1127.65	1297.13	20.03	23.88	26.24	13.88	12.22	13.94	1696.07	-0.814318	0.105396	-7.72626	1.10751e-14	4.84868e-12
ENSG00000161011.19	SQSTM1	protein_coding	sequestosome 1 [Source:HGNC Symbol;Acc:HGNC:11280]	2198.16	2232.18	2213.38	2214.84	2211.82	2239.28	17200.3	16868.7	16881.9	22029	25845.3	26054.7	392.09	377.41	376.83	504.08	582.58	581.82	20813.2	0.536953	0.0697092	7.70275	1.33165e-14	5.64188e-12
ENSG00000268104.2	SLC6A14	protein_coding	solute carrier family 6 member 14 [Source:HGNC Symbol;Acc:HGNC:11047]	3505.45	3484.3	3320.61	3579.68	3448	3412.29	5725.41	6051.98	6416.95	8751.71	8476.54	8265.96	83.74	86.87	91.9	128.48	122.58	118.43	7281.39	0.486432	0.0633661	7.67654	1.63445e-14	6.70838e-12
ENSG00000013364.18	MVP	protein_coding	major vault protein [Source:HGNC Symbol;Acc:HGNC:7531]	2389.79	2310.23	2334.04	2383.27	2401.33	2344.98	638.045	794.114	694.266	1100.21	1374.28	1321.18	13.67	16.7	14.57	23.66	29.11	27.74	987.024	0.83791	0.112114	7.47373	7.79549e-14	3.10261e-11
ENSG00000080224.17	EPHA6	protein_coding	EPH receptor A6 [Source:HGNC Symbol;Acc:HGNC:19296]	1913.53	2269.17	2140.28	2079.93	1467.32	2241.81	333.447	236.413	277.614	110.418	113.594	87.3463	8.44	5.87	6.88	2.81	2.85	2.16	193.101	-1.46144	0.198055	-7.37894	1.59554e-13	6.16346e-11
ENSG00000173517.10	PEAK1	protein_coding	pseudopodium enriched atypical kinase 1 [Source:HGNC Symbol;Acc:HGNC:29431]	7674.98	8388.32	7604.22	8175.85	7838.29	8010.3	2903.96	2582.67	2805.75	1961.45	1742.92	1873.56	18.48	16.14	17.49	12.53	10.96	11.68	2311.86	-0.572162	0.0775859	-7.37456	1.64892e-13	6.18768e-11
ENSG00000180730.4	SHISA2	protein_coding	shisa family member 2 [Source:HGNC Symbol;Acc:HGNC:20366]	2681.54	2674.37	2677.72	2678.74	2678.2	2677.97	2417.1	2770.65	2672.09	1646.59	1854.23	1732.47	45.64	51.34	49.4	31.21	34.62	32.04	2182.2	-0.587469	0.0805106	-7.2968	2.94695e-13	1.07514e-10
ENSG00000144452.14	ABCA12	protein_coding	ATP binding cassette subfamily A member 12 [Source:HGNC Symbol;Acc:HGNC:14637]	8914.35	8914.37	8917.72	8788.5	8918.2	8917.97	2562.13	2790.2	2453.98	4459.35	4137.87	3569.93	14.57	15.57	13.66	25.45	23.26	19.88	3328.89	0.640028	0.0877869	7.2907	3.08337e-13	1.09451e-10
ENSG00000129625.12	REEP5	protein_coding	receptor accessory protein 5 [Source:HGNC Symbol;Acc:HGNC:30077]	2204.42	2521.87	2578.73	2108.54	1882.4	1915.81	5398.42	5327.05	5392.27	6915.69	8118.36	8080.73	124.91	120.95	122.15	160.59	185.72	183.14	6538.69	0.519726	0.0715952	7.25923	3.89301e-13	1.34555e-10
ENSG00000173166.17	RAPH1	protein_coding	Ras association (RalGDS/AF-6) and pleckstrin homology domains 1 [Source:HGNC Symbol;Acc:HGNC:14436]	6749.14	7199.89	7312.93	6902.32	7287.17	6978.45	1536.96	1546.15	1566.71	2182.85	2185.04	2459.63	11	10.86	10.98	15.67	15.46	17.23	1912.8	0.554847	0.0772162	7.18562	6.69013e-13	2.25303e-10
ENSG00000173436.13	MINOS1	protein_coding	mitochondrial inner membrane organizing system 1 [Source:HGNC Symbol;Acc:HGNC:32068]	393.055	393.069	372.994	353.826	396.307	386.722	1286.76	1404.13	1433.78	945.055	834.805	791.418	170.14	182.22	185.67	125.5	109.12	102.51	1116	-0.683545	0.0954676	-7.15997	8.06954e-13	2.64963e-10
ENSG00000158258.16	CLSTN2	protein_coding	calsyntenin 2 [Source:HGNC Symbol;Acc:HGNC:17448]	8141.66	10397.4	8988.65	9061.49	8412.98	10035.6	640.743	463.019	626.517	283.849	295.237	277.402	3.54	2.51	3.4	1.57	1.62	1.51	431.088	-1.01648	0.144478	-7.03555	1.98476e-12	6.35802e-10
ENSG00000272196.2	HIST2H2AA4	protein_coding	histone cluster 2 H2A family member a4 [Source:HGNC Symbol;Acc:HGNC:29668]	385.64	378.48	381.82	382.83	382.29	382.07	2451.42	2910.57	2976.91	4300.88	3891.87	4430.7	324.36	378	385.63	571.24	509.09	574.25	3493.7	0.599042	0.085352	7.01849	2.2428e-12	7.01354e-10
ENSG00000068079.7	IFI35	protein_coding	interferon induced protein 35 [Source:HGNC Symbol;Acc:HGNC:5399]	953.008	947.472	973.304	929.565	971.959	960.474	1206.9	1106.44	984.939	1773.09	1789.16	1609.43	63.85	57.46	51.02	94.16	93.59	83.4	1411.64	0.648218	0.0935717	6.9275	4.28337e-12	1.30832e-09
ENSG00000181788.3	SIAH2	protein_coding	siah E3 ubiquitin protein ligase 2 [Source:HGNC Symbol;Acc:HGNC:10858]	2312.74	2292.72	2299.14	2299.48	2270.89	2291.19	3013.97	3105.48	3028.04	4045.52	4131.63	4017.52	66.43	67.18	65.35	89.5	90.04	86.74	3557	0.414543	0.0601703	6.8895	5.59877e-12	1.67123e-09
ENSG00000163220.10	S100A9	protein_coding	S100 calcium binding protein A9 [Source:HGNC Symbol;Acc:HGNC:10499]	398.63	391.47	394.81	395.83	395.28	395.06	1549.86	1533.74	1730.7	2695.39	2180.72	2917.57	198.32	192.62	216.85	346.22	275.92	365.71	2101.31	0.696116	0.101774	6.83984	7.92817e-12	2.31397e-09
ENSG00000206503.12	HLA-A	protein_coding	major histocompatibility complex, class I, A [Source:HGNC Symbol;Acc:HGNC:4931]	1431.44	1424.13	1426.7	1429.23	1426.39	1424.69	9214.91	8526.6	6996.83	14701	13821.2	11437.8	326.52	296.52	242.77	522.9	484.24	396.99	10783	0.691643	0.10155	6.81086	9.70193e-12	2.77011e-09
ENSG00000063978.15	RNF4	protein_coding	ring finger protein 4 [Source:HGNC Symbol;Acc:HGNC:10067]	2587.09	2416.54	2574.25	2563.65	2517.23	2504.06	2184.14	2373.83	2202.14	1562.75	1651.77	1552.58	43.72	46.63	43.15	31.4	32.69	30.43	1921.23	-0.504394	0.0741871	-6.79895	1.05383e-11	2.89545e-09
ENSG00000156639.11	ZFAND3	protein_coding	zinc finger AN1-type containing 3 [Source:HGNC Symbol;Acc:HGNC:18019]	1503.17	1414.76	1535.34	1442.26	1640.41	1642.09	2275.9	2543.87	2275.36	1692.73	1639.84	1485.8	75.36	82.68	73.77	56.26	53.68	48.19	1985.63	-0.559292	0.0822687	-6.79836	1.05818e-11	2.89545e-09
ENSG00000133065.10	SLC41A1	protein_coding	solute carrier family 41 member 1 [Source:HGNC Symbol;Acc:HGNC:19429]	3519.63	3563.7	3325.03	3289.99	3335.24	3550.46	2199.94	2080.99	2269.46	3394.82	2916.15	3095.16	32.44	30.12	32.77	50.26	42.52	44.71	2659.39	0.5218	0.0771257	6.76557	1.32783e-11	3.55912e-09
ENSG00000177885.13	GRB2	protein_coding	growth factor receptor bound protein 2 [Source:HGNC Symbol;Acc:HGNC:4566]	2012.47	1950.68	1873.96	2030.39	1967.54	1945.55	10992.2	11213.4	12255.9	8361.58	8593.99	8802.08	283.2	283.53	309.18	216.25	218.92	222.13	10036.6	-0.420097	0.0621511	-6.75929	1.38669e-11	3.64257e-09
ENSG00000171791.12	BCL2	protein_coding	BCL2, apoptosis regulator [Source:HGNC Symbol;Acc:HGNC:990]	6391.5	6450.94	6503.22	6398.31	6110.89	6052.83	2946.65	2960.55	2942.03	2206.83	2216.82	2131.44	23.59	23.26	23.07	17.73	17.55	16.72	2567.4	-0.433704	0.064372	-6.73746	1.61182e-11	4.15091e-09
ENSG00000187608.8	ISG15	protein_coding	ISG15 ubiquitin-like modifier [Source:HGNC Symbol;Acc:HGNC:4053]	532.588	525.435	528.786	529.818	529.252	529.015	18014	15970.7	16078.4	22669.1	23534.7	21589.5	1721.51	1497.89	1504.54	2174.55	2223.88	2021.06	19642.6	0.43706	0.0654738	6.67535	2.46649e-11	6.22978e-09
ENSG00000125505.16	MBOAT7	protein_coding	membrane bound O-acyltransferase domain containing 7 [Source:HGNC Symbol;Acc:HGNC:15505]	1588.12	1442.09	1471.46	1478.96	1507.21	1391.98	5087.56	4807.59	4920.81	6416.29	6459.97	7142.92	173.97	161.35	164.77	220.24	218.44	239.26	5805.82	0.434427	0.0653963	6.64299	3.0739e-11	7.61748e-09
ENSG00000250644.3	AC068580.4	protein_coding		1993.56	1733.12	1853.49	1867.75	1928.59	1925.32	2268.37	2098.78	1820.98	3235.49	3029.18	2938.69	60.97	55.35	47.91	87.28	80.47	77.36	2565.21	0.572521	0.086993	6.58122	4.66591e-11	1.13485e-08
ENSG00000102547.18	CAB39L	protein_coding	calcium binding protein 39 like [Source:HGNC Symbol;Acc:HGNC:20290]	2617.9	2649.51	2584.75	2635.17	2427.04	2723.01	507.693	613.711	649.341	955.714	1061.42	938.304	9.85	11.7	12.34	18.62	20.38	17.84	787.692	0.736663	0.112226	6.56408	5.23544e-11	1.25022e-08
ENSG00000123240.16	OPTN	protein_coding	optineurin [Source:HGNC Symbol;Acc:HGNC:17142]	2350.11	2437.52	2336.39	2387.85	2320.32	2358.74	1819.03	2141.3	1953.36	2886.65	3102.27	2679.42	38.9	44.94	40.9	61.96	65.6	56.12	2430.32	0.550998	0.0840551	6.55521	5.55645e-11	1.30319e-08
ENSG00000089127.12	OAS1	protein_coding	2'-5'-oligoadenylate synthetase 1 [Source:HGNC Symbol;Acc:HGNC:8086]	1505.57	1506.78	1529.91	1529.62	1513.03	1504.97	4638.42	5070.35	4302.13	7005.68	7250.09	6085.86	154.82	166.1	140.6	234.73	239.29	198.99	5725.42	0.537742	0.0822768	6.53577	6.32829e-11	1.45817e-08
ENSG00000104267.9	CA2	protein_coding	carbonic anhydrase 2 [Source:HGNC Symbol;Acc:HGNC:1373]	1486.5	1520.39	1521.34	1530.52	1517.65	1524.86	1826.09	1792.72	2034.48	1350.08	1285.73	1282.89	60.88	58.66	66.41	45.18	42.38	41.9	1595.34	-0.529835	0.0813206	-6.51539	7.25027e-11	1.64181e-08
ENSG00000123179.13	EBPL	protein_coding	emopamil binding protein like [Source:HGNC Symbol;Acc:HGNC:18061]	683.709	681.429	683.102	687.471	677.345	675.101	834.907	863.248	928.664	531.328	584.755	563.022	61.96	62.88	67.49	39.59	42.91	40.93	717.655	-0.647501	0.100212	-6.4613	1.03804e-10	2.31079e-08
ENSG00000103091.14	WDR59	protein_coding	WD repeat domain 59 [Source:HGNC Symbol;Acc:HGNC:25706]	1771.15	1677.75	1689.6	1757.63	1932.81	1618.43	2292.06	2315.12	1977.15	1580.14	1337.42	1487.99	66.65	66.1	56.31	46.13	38.47	42.4	1831.65	-0.578198	0.0907027	-6.37465	1.83384e-10	4.01428e-08
ENSG00000184979.9	USP18	protein_coding	ubiquitin specific peptidase 18 [Source:HGNC Symbol;Acc:HGNC:12616]	1950.54	1943.37	1946.72	1947.74	1947.2	1946.97	1794.56	1804.93	1689.77	2630.22	2586.19	2287.12	46.6	45.99	42.97	68.57	66.42	58.18	2132.13	0.503566	0.0790648	6.36903	1.90229e-10	4.09585e-08
ENSG00000081913.13	PHLPP1	protein_coding	PH domain and leucine rich repeat protein phosphatase 1 [Source:HGNC Symbol;Acc:HGNC:20610]	5768.99	5936.49	6207.72	5530.78	6208.2	6207.97	448.549	442.159	411.617	263.288	225.195	230.965	3.8	3.67	3.41	2.24	1.89	1.92	336.964	-0.855938	0.135108	-6.33521	2.37014e-10	5.02088e-08
ENSG00000133195.11	SLC39A11	protein_coding	solute carrier family 39 member 11 [Source:HGNC Symbol;Acc:HGNC:14463]	2061.48	2142.42	2001.18	1996.14	2201.86	2039.3	920.459	973.223	1101.07	642.468	615.531	657.386	22.46	23.31	26.31	15.73	14.85	15.71	818.388	-0.644627	0.101809	-6.33172	2.42445e-10	5.05441e-08
ENSG00000101868.10	POLA1	protein_coding	DNA polymerase alpha 1, catalytic subunit [Source:HGNC Symbol;Acc:HGNC:9173]	4930.5	4952.43	5207.47	4893.03	5290.69	5123.88	1467.32	1523.51	1480.66	1108.59	1013.68	971.934	14.66	14.93	14.48	11.11	10.01	9.51	1261	-0.532758	0.0842479	-6.3237	2.55375e-10	5.24077e-08
ENSG00000108679.12	LGALS3BP	protein_coding	galectin 3 binding protein [Source:HGNC Symbol;Acc:HGNC:6564]	1949.52	1994.52	1997.43	1969.28	2013.04	1987.53	14019.9	12994	11694.9	17646.3	18277.8	16984.7	357.13	324.86	291.7	451.22	460.39	423.8	15269.6	0.450733	0.0713095	6.3208	2.60211e-10	5.25786e-08
ENSG00000168016.13	TRANK1	protein_coding	tetratricopeptide repeat and ankyrin repeat containing 1 [Source:HGNC Symbol;Acc:HGNC:29011]	5962.96	5919.93	5595.28	4904.54	5459.88	5791.61	1190.76	1469.89	1175.25	2198.21	2401.56	1768.63	10.76	13.05	10.4	19.95	21.47	15.66	1700.75	0.730506	0.1158	6.30837	2.8199e-10	5.61161e-08
ENSG00000182150.15	ERCC6L2	protein_coding	ERCC excision repair 6 like 2 [Source:HGNC Symbol;Acc:HGNC:26922]	2021.61	2158.63	2057.54	1957.49	1886.74	2029.78	566.856	587.527	646.23	383.006	352.425	335.998	14.21	14.46	15.88	9.63	8.74	8.24	478.701	-0.752281	0.119437	-6.29854	3.00458e-10	5.88988e-08
ENSG00000126709.14	IFI6	protein_coding	interferon alpha inducible protein 6 [Source:HGNC Symbol;Acc:HGNC:4054]	659.285	651.825	655.315	656.119	655.738	655.232	34284.7	32366.3	29383.6	44481.7	45020.1	40593.6	2644.48	2450.19	2219.25	3444.02	3433.63	3067.17	37688.2	0.437803	0.0695667	6.29328	3.10822e-10	6.00343e-08
ENSG00000157601.13	MX1	protein_coding	MX dynamin like GTPase 1 [Source:HGNC Symbol;Acc:HGNC:7532]	2419.44	2434.09	2463.63	2439.2	2429.11	2435.5	5747.21	5418.39	4969.82	7921.98	7720.09	6851.52	119.26	110.35	100.97	165.01	158.41	139.27	6438.16	0.478949	0.0764389	6.26577	3.70989e-10	7.0617e-08
ENSG00000165140.9	FBP1	protein_coding	fructose-bisphosphatase 1 [Source:HGNC Symbol;Acc:HGNC:3606]	1251.16	1203.17	1215.75	1222.11	1243.66	1224.42	6614.35	6347.13	6890.61	8366.61	8575.01	9248.53	272.68	256.81	278.15	346.23	349.55	373.49	7673.66	0.39971	0.0639161	6.25368	4.00902e-10	7.52206e-08
ENSG00000156587.15	UBE2L6	protein_coding	ubiquitin conjugating enzyme E2 L6 [Source:HGNC Symbol;Acc:HGNC:12490]	1092.56	1131.81	1146.73	1131.64	1099.45	1110.76	2621.61	2407.66	2029.29	3674.64	3824.07	3223.71	118.51	106.82	89.82	166.74	170.93	142.75	2963.49	0.602822	0.096628	6.23858	4.4155e-10	8.16806e-08
ENSG00000136051.13	WASHC4	protein_coding	WASH complex subunit 4 [Source:HGNC Symbol;Acc:HGNC:29174]	4728.52	4892.87	4594.14	5017.6	4310.5	4809.52	2073.54	2261.34	2491.11	1553.33	1665.02	1491.72	22.22	23.77	26.14	16.7	17.64	15.66	1922.68	-0.5377	0.0866432	-6.20591	5.43823e-10	9.92025e-08
ENSG00000169908.11	TM4SF1	protein_coding	transmembrane 4 L six family member 1 [Source:HGNC Symbol;Acc:HGNC:11853]	1561.6	1554.77	1577.73	1523.73	1554.83	1527.5	506.461	335.451	379.816	222.935	175.722	159.951	16.52	10.73	12.14	7.3	5.67	5.11	296.739	-1.1338	0.183662	-6.17334	6.6864e-10	1.203e-07
ENSG00000231925.11	TAPBP	protein_coding	TAP binding protein [Source:HGNC Symbol;Acc:HGNC:11566]	3364.01	3337.84	3366.75	3392.94	3379.26	3401.9	6971.28	6621.47	6741.15	8400.87	8642.37	8902.87	104.49	97.4	98.93	126.39	128.09	130.72	7713.3	0.351593	0.0569958	6.16875	6.883e-10	1.22164e-07
ENSG00000134326.11	CMPK2	protein_coding	cytidine/uridine monophosphate kinase 2 [Source:HGNC Symbol;Acc:HGNC:27015]	2318.49	2243.1	2275.75	2167.17	2234.41	2249.1	418.36	491.562	424.266	816.708	870.338	643.991	9.41	10.86	9.35	18.45	19.36	14.19	610.853	0.802983	0.130364	6.15952	7.29658e-10	1.27778e-07
ENSG00000160285.14	LSS	protein_coding	lanosterol synthase [Source:HGNC Symbol;Acc:HGNC:6708]	4034.48	4051.68	4171.71	4111.29	4203.27	4099.28	4770.58	3724.01	4163.08	6409.95	5621.81	6974.81	58.67	44.96	50.13	79.13	68.37	84.03	5277.32	0.586574	0.0953269	6.15329	7.58933e-10	1.31156e-07
ENSG00000111335.12	OAS2	protein_coding	2'-5'-oligoadenylate synthetase 2 [Source:HGNC Symbol;Acc:HGNC:8087]	3126.96	3013.34	3339.16	3089.13	3254.28	3141.76	4156.02	4629.91	3490.42	7400.47	6669.66	5458.05	66.52	72.74	54.71	118.91	105.57	85.59	5300.76	0.669951	0.109411	6.12325	9.16841e-10	1.56387e-07
ENSG00000187837.3	HIST1H1C	protein_coding	histone cluster 1 H1 family member c [Source:HGNC Symbol;Acc:HGNC:4716]	463.6	456.43	459.78	460.79	460.25	460.03	987.805	1243.88	1114.51	1578.16	1841.76	1671.54	108.56	134.16	119.93	174.09	200.13	179.94	1406.27	0.606041	0.0990754	6.11696	9.53762e-10	1.60599e-07
ENSG00000197956.9	S100A6	protein_coding	S100 calcium binding protein A6 [Source:HGNC Symbol;Acc:HGNC:10496]	486.714	469.091	481.72	479.306	483.446	481.519	262.474	245.921	271.803	461.824	437.135	439.101	27.64	25.41	28.02	48.81	45.51	45.29	353.042	0.775698	0.127869	6.06634	1.30859e-09	2.15013e-07
ENSG00000279296.1	PRAL	TEC	p53 regulation associated lncRNA [Source:HGNC Symbol;Acc:HGNC:52646]	3107.54	3100.37	3103.72	3104.74	3104.2	3103.97	314.505	336.907	247.87	632.663	526.13	502.339	5.13	5.39	3.95	10.35	8.48	8.01	426.734	0.888724	0.146504	6.06621	1.30966e-09	2.15013e-07
ENSG00000145555.14	MYO10	protein_coding	myosin X [Source:HGNC Symbol;Acc:HGNC:7593]	7376.81	7064.44	7611.15	7346.48	7352.77	7479.1	1137.12	1190.27	1075.14	821.271	753.973	730.81	7.8	8.02	7.22	5.66	5.12	4.92	951.394	-0.560171	0.0929236	-6.0283	1.65694e-09	2.6867e-07
ENSG00000244242.1	IFITM10	protein_coding	interferon induced transmembrane protein 10 [Source:HGNC Symbol;Acc:HGNC:40022]	2590.18	2705.18	2606.02	2644.59	2648.43	2692.53	497.528	454.628	379.357	745.346	840.735	680.241	9.51	8.52	7.09	14.29	15.88	12.73	599.672	0.76578	0.12815	5.97566	2.29162e-09	3.6705e-07
ENSG00000143416.20	SELENBP1	protein_coding	selenium binding protein 1 [Source:HGNC Symbol;Acc:HGNC:10719]	1560.66	1493.49	1543.37	1564.28	1489.92	1513.34	3939.85	3441.02	3142.42	5201.48	5103.53	4669.47	130.45	111.83	101.87	172.88	167.08	151.46	4249.62	0.508472	0.0851634	5.97055	2.36462e-09	3.7418e-07
ENSG00000125347.13	IRF1	protein_coding	interferon regulatory factor 1 [Source:HGNC Symbol;Acc:HGNC:6116]	1547.63	1727.79	1580	1488.87	1606.2	1502.67	839.89	834.793	764.365	1172.95	1262.95	1124.75	26.99	26.32	24.05	37.83	40.14	35.4	999.957	0.544848	0.0914753	5.95623	2.58126e-09	4.01916e-07
ENSG00000167306.19	MYO5B	protein_coding	myosin VB [Source:HGNC Symbol;Acc:HGNC:7603]	5812.78	6065.26	5780.65	5499.9	5415.31	5640.58	2635.12	2428.07	2647.55	1899	1825.22	1976.23	23.39	21.15	23	16.91	16.01	17.18	2235.22	-0.435086	0.0730626	-5.95498	2.6011e-09	4.01916e-07
ENSG00000072042.12	RDH11	protein_coding	retinol dehydrogenase 11 (all-trans/9-cis/11-cis) [Source:HGNC Symbol;Acc:HGNC:17964]	2221.43	2289.11	2240.17	2225.91	2235.6	2247.17	2831.21	2812.25	2958.15	3797.99	3726.5	3633.01	63.83	62.22	65.3	85.93	83.06	80.23	3293.15	0.374424	0.0629106	5.95168	2.65401e-09	4.05323e-07
ENSG00000101347.8	SAMHD1	protein_coding	SAM and HD domain containing deoxynucleoside triphosphate triphosphohydrolase 1 [Source:HGNC Symbol;Acc:HGNC:15925]	4490.91	4542.47	4536.75	4533.07	4540.38	4593.04	4612.79	4818.76	4457.07	6574.47	6329.83	5691.78	51.39	52.69	48.62	73.51	69.73	62.1	5414.08	0.42064	0.0707219	5.94781	2.71761e-09	4.07848e-07
ENSG00000148346.11	LCN2	protein_coding	lipocalin 2 [Source:HGNC Symbol;Acc:HGNC:6526]	613.528	615.435	624.863	620.731	623.053	624.948	763.943	951.424	1024.49	1315.41	1475.28	1741.7	62.27	76.1	81.77	107.62	118.9	139.06	1212.03	0.727388	0.122314	5.9469	2.73265e-09	4.07848e-07
ENSG00000114770.16	ABCC5	protein_coding	ATP binding cassette subfamily C member 5 [Source:HGNC Symbol;Acc:HGNC:56]	4012.12	3828.4	3824.59	3744.06	3743.67	3900.26	2381.13	2504.27	2307.38	3259.18	3091.29	3135.48	31.34	32.37	29.74	43.07	40.24	40.44	2779.77	0.399979	0.067388	5.93547	2.93012e-09	4.32406e-07
ENSG00000034677.12	RNF19A	protein_coding	ring finger protein 19A, RBR E3 ubiquitin protein ligase [Source:HGNC Symbol;Acc:HGNC:13432]	3287.81	3419.64	3537.6	3901.93	2803.28	3677.91	1350.51	1414.13	1329.78	834.308	1045.75	787.601	19.98	20.51	19.25	12.38	15.29	11.41	1126.99	-0.626659	0.105762	-5.9252	3.11919e-09	4.55194e-07
ENSG00000206337.10	HCP5	sense_overlapping	HLA complex P5 (non-protein coding) [Source:HGNC Symbol;Acc:HGNC:21659]	2253.54	2045.32	2412.55	2134.71	2011.55	2016.91	91.9727	99.6232	69.648	310.322	204.808	178.606	2.17	2.31	1.61	7.35	4.78	4.13	159.134	1.41655	0.239164	5.92292	3.16272e-09	4.56475e-07
ENSG00000180596.7	HIST1H2BC	protein_coding	histone cluster 1 H2B family member c [Source:HGNC Symbol;Acc:HGNC:4757]	449.24	441.596	452.874	451.835	453.312	443.618	180.742	206.081	208.734	321.153	382.292	445.31	20.37	22.79	23.03	36.33	42.6	49.16	290.716	0.951171	0.160717	5.91829	3.25311e-09	4.64416e-07
ENSG00000100342.20	APOL1	protein_coding	apolipoprotein L1 [Source:HGNC Symbol;Acc:HGNC:618]	2227.36	2409.87	2299.3	2209.12	2299.98	2156.08	316.565	370.666	332.923	577.331	605.744	513.223	7.07	8.12	7.27	12.94	13.37	11.22	452.74	0.732459	0.124608	5.8781	4.15013e-09	5.86105e-07
ENSG00000148175.12	STOM	protein_coding	stomatin [Source:HGNC Symbol;Acc:HGNC:3383]	2258.77	2503.96	2357.32	2396.22	2198.7	2300.67	1649.05	1721.35	1837.86	2216.28	2806.77	2544.53	35.73	36.6	38.99	48.2	60.13	54.01	2129.3	0.537345	0.0914949	5.87295	4.2812e-09	5.91887e-07
ENSG00000221963.5	APOL6	protein_coding	apolipoprotein L6 [Source:HGNC Symbol;Acc:HGNC:14870]	9942.54	9935.37	9938.72	9939.74	9939.2	9938.97	227.014	285.625	242.893	467.314	518.07	397.777	1.15	1.43	1.21	2.39	2.61	1.98	356.447	0.871308	0.148348	5.8734	4.26947e-09	5.91887e-07
ENSG00000123213.22	NLN	protein_coding	neurolysin [Source:HGNC Symbol;Acc:HGNC:16058]	2786.64	2924.56	2800.63	2838.63	2904.45	3031.91	2487.21	2475.77	2825.52	1967.42	1767.93	1878.3	43.68	42.66	48.58	34.68	30.7	32.32	2233.66	-0.472079	0.0804327	-5.86925	4.37779e-09	5.98937e-07
ENSG00000099194.5	SCD	protein_coding	stearoyl-CoA desaturase [Source:HGNC Symbol;Acc:HGNC:10571]	5183.54	5176.37	5179.72	5180.74	5180.2	5179.97	22935.6	19451.8	22912	32145	27419.7	30256.7	223.89	186.36	219.01	314.98	264.67	289.33	25853.3	0.459852	0.0785388	5.8551	4.76721e-09	6.4549e-07
ENSG00000147457.13	CHMP7	protein_coding	charged multivesicular body protein 7 [Source:HGNC Symbol;Acc:HGNC:28439]	2312.03	2704.37	2638.23	2676.28	2648.78	2395.21	1185.14	1018.06	1046.88	627.394	596.459	791.136	23.43	19.75	20.26	12.46	11.66	15.33	877.493	-0.685161	0.117539	-5.82922	5.56885e-09	7.4634e-07
ENSG00000116133.11	DHCR24	protein_coding	24-dehydrocholesterol reductase [Source:HGNC Symbol;Acc:HGNC:2859]	4052.4	4047.43	4048.33	4028.39	4045.54	4040.98	8916.46	8273.8	9148.38	10901.2	11242.2	12087.9	111.5	101.54	112.01	136.84	139.02	148.08	10095	0.378082	0.0650865	5.80892	6.28773e-09	8.2583e-07
ENSG00000172183.14	ISG20	protein_coding	interferon stimulated exonuclease gene 20 [Source:HGNC Symbol;Acc:HGNC:6130]	660.583	728.885	754.319	665.964	675.656	668.079	440.298	396.544	342.236	662.483	738.01	593.342	32.21	28.45	24.53	48.63	53.39	42.54	528.807	0.756861	0.130269	5.80998	6.24787e-09	8.2583e-07
ENSG00000161905.12	ALOX15	protein_coding	arachidonate 15-lipoxygenase [Source:HGNC Symbol;Acc:HGNC:433]	1983.31	2089.95	2023.12	1789.34	1862.38	1994.68	602.72	539.318	523.558	864.875	807.777	837.931	15.6	13.69	13.26	22.46	20.67	21.23	696.028	0.592581	0.102197	5.79844	6.69362e-09	8.61902e-07
ENSG00000198133.8	TMEM229B	protein_coding	transmembrane protein 229B [Source:HGNC Symbol;Acc:HGNC:20130]	3710.15	3711.37	3670.18	3606.42	3519.58	3510.66	978.228	954.935	959.999	1274.83	1431.28	1356.98	13.67	13.09	13.12	17.87	19.77	18.56	1159.35	0.488193	0.0841913	5.79861	6.68657e-09	8.61902e-07
ENSG00000138162.18	TACC2	protein_coding	transforming acidic coiled-coil containing protein 2 [Source:HGNC Symbol;Acc:HGNC:11523]	3316.16	3147.61	2983.76	3593.07	3195.35	3254.77	1829.89	1644.92	1760.95	2406.94	2237.22	2482.36	28.51	25.16	26.89	37.68	34.48	37.91	2060.43	0.44566	0.076882	5.79667	6.76449e-09	8.62571e-07
ENSG00000169519.20	METTL15	protein_coding	methyltransferase like 15 [Source:HGNC Symbol;Acc:HGNC:26606]	3925.99	3734.74	3712.78	3853.18	3850.83	3828.78	523.386	596.353	580.941	369.303	346.797	340.365	6.93	7.76	7.53	4.9	4.54	4.42	459.493	-0.685766	0.11847	-5.78852	7.10086e-09	8.96757e-07
ENSG00000168386.18	FILIP1L	protein_coding	filamin A interacting protein 1 like [Source:HGNC Symbol;Acc:HGNC:24589]	2993.02	2870.63	3061.41	3049.91	3108.34	3029.82	178.806	265.624	254.907	460.316	390.644	509.295	2.99	4.37	4.18	7.74	6.47	8.36	343.262	0.965695	0.167028	5.78163	7.39802e-09	9.25386e-07
ENSG00000243649.8	CFB	protein_coding	complement factor B [Source:HGNC Symbol;Acc:HGNC:1037]	1758.58	1789.3	1819.13	1680.47	1842.43	1881.81	2710.96	3466.12	2824.83	4202.65	4819.53	4134.22	76.4	95.89	77.95	118.91	134.32	114.14	3693.09	0.547803	0.0950083	5.76585	8.12494e-09	1.00673e-06
ENSG00000111331.12	OAS3	protein_coding	2'-5'-oligoadenylate synthetase 3 [Source:HGNC Symbol;Acc:HGNC:8088]	5720.68	5811.55	5766.72	5753.06	5747.91	5789.04	24633.9	23194.7	21825.7	30768.6	30480.6	28384.4	216.07	199.69	187.46	270.91	264.37	243.9	26547.9	0.36366	0.0633014	5.7449	9.1975e-09	1.12897e-06
ENSG00000127328.21	RAB3IP	protein_coding	RAB3A interacting protein [Source:HGNC Symbol;Acc:HGNC:16508]	1232.43	1180.53	1192.31	1151.91	1299.88	1354.34	1055.63	1170.58	1133.06	838.501	651.098	602.431	43.23	47.06	45.48	34.54	26.36	24.22	908.453	-0.684435	0.119197	-5.74206	9.35296e-09	1.13742e-06
ENSG00000141425.17	RPRD1A	protein_coding	regulation of nuclear pre-mRNA domain containing 1A [Source:HGNC Symbol;Acc:HGNC:25560]	2978.43	3051.18	3012.34	2861.42	2900.72	2870.43	2903.73	3111.09	3049.61	2366.17	2331.99	2142.67	49.86	52.44	51.28	40.78	39.6	36.04	2650.92	-0.407335	0.0711969	-5.72125	1.05743e-08	1.27416e-06
ENSG00000184178.15	SCFD2	protein_coding	sec1 family domain containing 2 [Source:HGNC Symbol;Acc:HGNC:30676]	2483.81	2545.98	2710.24	2441.55	2389.47	2758.76	499.072	478.01	454.185	306.494	287.368	277.982	9.89	9.3	8.81	6.1	5.64	5.4	383.834	-0.715813	0.125412	-5.70768	1.14528e-08	1.36746e-06
ENSG00000204386.10	NEU1	protein_coding	neuraminidase 1 [Source:HGNC Symbol;Acc:HGNC:7758]	1918.9	1921.2	1920.02	1905.73	1915.86	1909.1	2931.95	2576.22	2840.43	3662.18	3580.76	3784.62	77.42	66.76	73.43	97.06	93.48	97.88	3229.34	0.401061	0.0708605	5.65987	1.51484e-08	1.79242e-06
ENSG00000110013.12	SIAE	protein_coding	sialic acid acetylesterase [Source:HGNC Symbol;Acc:HGNC:18187]	2941.62	3023.94	2995.95	3043.35	2983.97	3103.94	551.763	727.507	630.201	338.467	418.775	374.478	9.24	11.97	10.34	5.7	6.95	6.15	506.838	-0.755543	0.133713	-5.65049	1.59992e-08	1.87619e-06
ENSG00000170153.10	RNF150	protein_coding	ring finger protein 150 [Source:HGNC Symbol;Acc:HGNC:23138]	7429.53	7363.82	8756.89	7433.37	7396.09	8161.18	899.173	1062.23	946.308	667.825	674.514	593.344	5.87	6.81	6.05	4.38	4.35	3.81	807.156	-0.588018	0.10417	-5.64481	1.65364e-08	1.92203e-06
ENSG00000130589.16	HELZ2	protein_coding	helicase with zinc finger 2 [Source:HGNC Symbol;Acc:HGNC:30021]	4013.19	3764.65	3888.21	3962.29	3801.32	3862.95	10944.3	9939.11	8588.58	13424.9	14133.4	12994.6	142.59	127.09	109.56	175.57	182.08	165.84	11670.8	0.460319	0.0815806	5.64251	1.67588e-08	1.93079e-06
ENSG00000102265.11	TIMP1	protein_coding	TIMP metallopeptidase inhibitor 1 [Source:HGNC Symbol;Acc:HGNC:11820]	707.87	707.512	706.321	713.574	702.169	710.748	956.531	912.73	977.19	1258.95	1578.04	1341.71	68.31	63.98	68.34	90.25	111.44	93.87	1170.85	0.550617	0.0981474	5.61011	2.02204e-08	2.30934e-06
ENSG00000068489.12	PRR11	protein_coding	proline rich 11 [Source:HGNC Symbol;Acc:HGNC:25619]	1837.58	1821.91	1860.09	1932	1832.56	1888.86	3298.18	3024.18	3289.36	2505.44	2437.56	2451.44	89.58	80.6	87.48	68.3	65.45	65.22	2834.37	-0.379069	0.0676132	-5.60643	2.06543e-08	2.31858e-06
ENSG00000079459.12	FDFT1	protein_coding	farnesyl-diphosphate farnesyltransferase 1 [Source:HGNC Symbol;Acc:HGNC:3629]	1634.21	1638.68	1600.05	1573	1649.02	1602.81	2662.67	2450.41	2811.13	3746.22	3320.66	3607.1	83.31	75.25	86.13	117.66	102.74	110.56	3099.69	0.429467	0.0765855	5.60769	2.05048e-08	2.31858e-06
ENSG00000121064.12	SCPEP1	protein_coding	serine carboxypeptidase 1 [Source:HGNC Symbol;Acc:HGNC:29507]	1527.88	1543.99	1471.07	1582.3	1472.28	1560.49	1087.81	1176.73	1206.44	1513.54	1653.9	1615.56	36.05	38.28	39.15	50.35	54.2	52.45	1375.65	0.461897	0.0826087	5.59139	2.25265e-08	2.47253e-06
ENSG00000140525.17	FANCI	protein_coding	Fanconi anemia complementation group I [Source:HGNC Symbol;Acc:HGNC:25568]	2948.94	2805.18	3009.64	3016.06	3094.78	2880.69	6609.76	7061.29	6761.29	5642.87	5164.73	5139.83	113	118.49	113.19	96.85	87.29	86.09	6063.33	-0.357373	0.0638874	-5.5938	2.2215e-08	2.47253e-06
ENSG00000182871.14	COL18A1	protein_coding	collagen type XVIII alpha 1 chain [Source:HGNC Symbol;Acc:HGNC:2195]	4601.65	4579.75	4535.62	4470.15	4497.81	4476.89	7551.8	6685.71	6612.58	5189.51	5479.47	5316.11	84.36	73.31	72.32	58.2	60.53	58.17	6139.23	-0.383755	0.0686393	-5.59089	2.25905e-08	2.47253e-06
ENSG00000102893.15	PHKB	protein_coding	phosphorylase kinase regulatory subunit beta [Source:HGNC Symbol;Acc:HGNC:8927]	2771.51	3005.52	3101.97	3150.71	2936.11	3241.1	1976.67	1928.46	1904	1429.18	1532.01	1379.29	32.99	31.58	31.11	23.93	25.28	22.55	1691.61	-0.423016	0.0758607	-5.57621	2.45809e-08	2.66814e-06
ENSG00000130635.15	COL5A1	protein_coding	collagen type V alpha 1 chain [Source:HGNC Symbol;Acc:HGNC:2209]	7063.73	6685.18	7135.92	6875.11	7771.45	7034.26	1789.02	1896.42	1629.35	1308.94	1011.09	1249.9	12.77	13.29	11.39	9.38	7.14	8.74	1480.8	-0.571663	0.102623	-5.57053	2.53964e-08	2.73406e-06
ENSG00000152503.9	TRIM36	protein_coding	tripartite motif containing 36 [Source:HGNC Symbol;Acc:HGNC:16280]	2591.02	2679.11	3223.38	2504.42	3484.39	4015.73	149.511	172.085	162.66	87.2792	50.4277	50.6466	2.49	2.82	2.65	1.45	0.83	0.83	112.178	-1.39116	0.250644	-5.55035	2.85095e-08	3.04426e-06
ENSG00000117593.9	DARS2	protein_coding	aspartyl-tRNA synthetase 2, mitochondrial [Source:HGNC Symbol;Acc:HGNC:25538]	3262.06	3290.84	3253.25	3274.42	3211.39	3237.71	5569.98	5338.61	5739.5	4561.14	4285.24	4184.34	86.54	81.4	87.31	71.12	65.83	63.68	4946.5	-0.354122	0.0639133	-5.54066	3.01339e-08	3.19176e-06
ENSG00000104823.8	ECH1	protein_coding	enoyl-CoA hydratase 1 [Source:HGNC Symbol;Acc:HGNC:3149]	885.146	863.434	894.573	851.797	931.161	925.787	2383.83	2325.64	2253.37	3106.81	2849.8	3161.85	135.22	129.47	125.15	176.89	159.83	175.68	2680.21	0.390252	0.0705371	5.53258	3.1556e-08	3.31565e-06
ENSG00000204264.8	PSMB8	protein_coding	proteasome subunit beta 8 [Source:HGNC Symbol;Acc:HGNC:9545]	975.878	962.645	975.219	976.066	974.858	972.426	842.407	886.233	674.953	1385.62	1299.89	1099.85	43.78	45.19	34.37	72.28	66.84	56.01	1031.49	0.655767	0.118597	5.5294	3.21336e-08	3.34955e-06
ENSG00000143320.8	CRABP2	protein_coding	cellular retinoic acid binding protein 2 [Source:HGNC Symbol;Acc:HGNC:2339]	811.504	804.37	805.933	809.372	808.763	807.178	27794.1	26950.3	25413.6	35588.7	32956.7	32554.5	1739.76	1655.64	1557.63	2236.1	2039.82	1996.12	30209.6	0.334804	0.0606341	5.52171	3.35722e-08	3.44598e-06
ENSG00000173193.13	PARP14	protein_coding	poly(ADP-ribose) polymerase family member 14 [Source:HGNC Symbol;Acc:HGNC:29232]	7190.36	7410.46	7430.48	7345.75	7352.84	7235.24	9921.98	10925.8	9887.99	13276.2	13512.5	12448.4	68.48	74	66.82	91.97	92.21	84.16	11662.1	0.352216	0.0637882	5.52165	3.35835e-08	3.44598e-06
ENSG00000126947.12	ARMCX1	protein_coding	armadillo repeat containing, X-linked 1 [Source:HGNC Symbol;Acc:HGNC:18073]	1962.54	1955.37	1958.72	1959.74	1959.2	1958.97	627.698	625.474	613.935	984.857	840.984	896.062	16.2	15.84	15.52	25.52	21.46	22.66	764.831	0.545156	0.0991623	5.49761	3.84964e-08	3.91947e-06
ENSG00000176658.16	MYO1D	protein_coding	myosin ID [Source:HGNC Symbol;Acc:HGNC:7598]	5214.17	5312.11	5070.6	5061.77	5005.02	4917.07	1769.96	1590.97	1954.96	1278.26	1098.64	1285.61	17.57	15.5	19	12.74	10.79	12.51	1496.33	-0.535607	0.0975099	-5.49285	3.95506e-08	3.99582e-06
ENSG00000166710.17	B2M	protein_coding	beta-2-microglobulin [Source:HGNC Symbol;Acc:HGNC:914]	453.555	441.552	444.617	451.921	445.019	444.523	22719.1	28256.4	24541.2	35471.8	36087	31492	2571	3138.3	2719.36	4029.39	4037.99	3491.02	29761.2	0.448425	0.0816638	5.49112	3.99402e-08	4.00439e-06
ENSG00000102317.17	RBM3	protein_coding	RNA binding motif (RNP1, RRM) protein 3 [Source:HGNC Symbol;Acc:HGNC:9900]	1188.31	1166.33	1170.18	1191.46	1142.71	1205.13	4821.99	5189.42	5076.21	3869.08	4126.84	3872.69	207.13	218.79	213.52	166.82	175.29	162.96	4492.72	-0.34686	0.0634148	-5.4697	4.50802e-08	4.48548e-06
ENSG00000162636.15	FAM102B	protein_coding	family with sequence similarity 102 member B [Source:HGNC Symbol;Acc:HGNC:27637]	5448.11	5437.61	5446.02	5445.55	5458.12	5445.55	7860.45	8969.33	8604.65	11268.3	11112.2	10351.8	72.98	81.72	78.22	105.01	102.01	94.14	9694.44	0.363797	0.0672377	5.41061	6.28094e-08	6.20255e-06
ENSG00000109099.13	PMP22	protein_coding	peripheral myelin protein 22 [Source:HGNC Symbol;Acc:HGNC:9118]	1492.66	1578.9	1631.77	1545.09	1514.61	1403.3	114.697	148.929	140.614	203.732	357.93	339.298	3.81	4.85	4.56	6.78	11.73	11.01	217.494	1.15482	0.213628	5.40577	6.45291e-08	6.32481e-06
ENSG00000164904.17	ALDH7A1	protein_coding	aldehyde dehydrogenase 7 family member A1 [Source:HGNC Symbol;Acc:HGNC:877]	1420.05	1437.65	1459.82	1431.42	1468.13	1462.54	2750.05	2631.06	2797.94	2073.63	1971.49	2199.69	96.13	90.27	95.78	72.77	68.16	75.31	2403.97	-0.388096	0.071963	-5.39299	6.92937e-08	6.74151e-06
ENSG00000198722.14	UNC13B	protein_coding	unc-13 homolog B [Source:HGNC Symbol;Acc:HGNC:12566]	6152.41	6142.29	6132.42	6117.91	6152.63	6005.35	1390.69	1339.33	1437.97	1758.44	1860.94	1961.76	11.49	10.88	11.64	14.59	15.21	15.88	1624.84	0.421127	0.0784942	5.36507	8.09183e-08	7.81457e-06
ENSG00000183486.12	MX2	protein_coding	MX dynamin like GTPase 2 [Source:HGNC Symbol;Acc:HGNC:7533]	2719.18	2862.4	2419.48	2816.1	2909.96	2363.3	228.569	216.893	241.861	404.838	381.94	361.205	4.32	4.03	4.48	7.69	7.14	6.69	305.875	0.738238	0.137707	5.36095	8.27871e-08	7.93668e-06
ENSG00000124201.14	ZNFX1	protein_coding	zinc finger NFX1-type containing 1 [Source:HGNC Symbol;Acc:HGNC:29271]	7055.47	7031.45	7044.49	6988.55	7068.86	7062.83	5866.87	6843.32	6323.39	7941.63	8855.45	8125.66	42.13	48.23	44.46	57.24	62.88	57.15	7326.01	0.388723	0.0726643	5.34958	8.81602e-08	8.39055e-06
ENSG00000176463.13	SLCO3A1	protein_coding	solute carrier organic anion transporter family member 3A1 [Source:HGNC Symbol;Acc:HGNC:10952]	2849.69	2282.27	3604.51	2704.58	2920.84	3201.95	812.578	938.178	581.281	480.127	436.661	393.346	14.17	16.07	9.93	8.42	7.53	6.72	607.054	-0.828265	0.155172	-5.33772	9.41214e-08	8.89346e-06
ENSG00000167996.15	FTH1	protein_coding	ferritin heavy chain 1 [Source:HGNC Symbol;Acc:HGNC:3976]	659.035	660.932	665.107	659.85	663.057	659.035	55315.7	58627.8	59899.7	67981.9	74322.9	76739.5	4230.63	4400.71	4485.8	5219.11	5620.65	5749.32	65480.9	0.333366	0.0625533	5.32931	9.8588e-08	9.24896e-06
ENSG00000155366.16	RHOC	protein_coding	ras homolog family member C [Source:HGNC Symbol;Acc:HGNC:669]	918.507	902.981	912.039	896.834	928.993	905.051	6619.23	6418.31	6147.14	7831.81	7859.27	7975.26	367.55	349.8	334.21	436.5	431.52	433.79	7141.82	0.303015	0.0572653	5.29143	1.21366e-07	1.13051e-05
ENSG00000104142.10	VPS18	protein_coding	VPS18, CORVET/HOPS core subunit [Source:HGNC Symbol;Acc:HGNC:15972]	3696.35	3677.88	3648.64	3564.06	3665.29	3697.88	1018.95	998.437	983.984	1298.97	1347.02	1392.16	14.08	13.55	13.32	18.03	18.41	18.85	1173.25	0.428951	0.0810894	5.28986	1.22411e-07	1.13221e-05
ENSG00000176771.16	NCKAP5	protein_coding	NCK associated protein 5 [Source:HGNC Symbol;Acc:HGNC:29847]	5895.52	6224.51	5779.85	5599.2	5444.21	5389.2	296.446	282.955	351.257	163.392	177.988	177.564	2.62	2.45	3.04	1.45	1.55	1.54	241.627	-0.84629	0.160401	-5.27608	1.31977e-07	1.21216e-05
ENSG00000008083.13	JARID2	protein_coding	jumonji and AT-rich interaction domain containing 2 [Source:HGNC Symbol;Acc:HGNC:6196]	5529.85	5478.02	5494.53	5456.9	5489.35	5564.17	2842.83	2731.13	2600.91	2206.56	2052.81	1939.99	26.12	24.63	23.4	20.35	18.65	17.47	2395.71	-0.399831	0.0759009	-5.26781	1.38062e-07	1.25056e-05
ENSG00000185920.15	PTCH1	protein_coding	patched 1 [Source:HGNC Symbol;Acc:HGNC:9585]	1526.18	1986.48	2200.77	5110.42	5729.88	3274.69	125.294	73.6671	81.5422	30.2385	19.9921	34.4116	2.18	1.26	1.41	0.52	0.34	0.57	61.1482	-1.75103	0.332363	-5.26843	1.37597e-07	1.25056e-05
ENSG00000135899.17	SP110	protein_coding	SP110 nuclear body protein [Source:HGNC Symbol;Acc:HGNC:5401]	1705.52	1664.21	1676.55	1692.1	1693.23	1695.34	1692.19	1974.06	1793.9	2477.56	2740.31	2297.91	50.71	58.03	52.63	74.52	81.18	67.45	2162.64	0.460312	0.0876466	5.25191	1.50528e-07	1.35413e-05
ENSG00000175115.11	PACS1	protein_coding	phosphofurin acidic cluster sorting protein 1 [Source:HGNC Symbol;Acc:HGNC:30032]	3823.95	3561.65	3509	3594.47	3748.54	3794.06	3039.96	3079.74	3284.16	2396.75	2496.53	2483.15	41.89	41.64	44.31	33.16	34.02	33.5	2796.71	-0.350572	0.0670161	-5.23116	1.68446e-07	1.50501e-05
ENSG00000075391.16	RASAL2	protein_coding	RAS protein activator like 2 [Source:HGNC Symbol;Acc:HGNC:9874]	6447.32	6226.66	6338.07	6486.6	6002.26	6508.85	632.706	637.197	665.275	402.748	434.42	462.482	5.05	5	5.21	3.23	3.42	3.62	539.21	-0.574647	0.110359	-5.20706	1.91854e-07	1.70258e-05
ENSG00000143546.9	S100A8	protein_coding	S100 calcium binding protein A8 [Source:HGNC Symbol;Acc:HGNC:10498]	346.936	338.279	343.267	342.976	342.375	341.939	318.978	410.821	418.061	649.309	545.377	664.545	47.08	59.51	60.42	96.19	79.59	96.08	501.18	0.699841	0.135525	5.16393	2.41816e-07	2.13155e-05
ENSG00000124126.13	PREX1	protein_coding	phosphatidylinositol-3,4,5-trisphosphate dependent Rac exchange factor 1 [Source:HGNC Symbol;Acc:HGNC:32594]	5896.71	5884.38	5847.94	5914	5904.33	5950.62	12398.4	11763.7	11223	8991.87	9937.7	9176.36	106.27	98.96	94.19	77.37	84.22	77.05	10581.9	-0.332603	0.064462	-5.15968	2.47379e-07	2.16605e-05
ENSG00000162522.10	KIAA1522	protein_coding	KIAA1522 [Source:HGNC Symbol;Acc:HGNC:29301]	4880.18	4937.47	4886.21	4883.43	5012.93	4983.45	6480.63	6032.47	5975.22	7428.94	7702.65	7802.76	66.47	60.72	60.01	76.48	78.12	78.4	6903.76	0.310845	0.0603564	5.15016	2.60259e-07	2.26374e-05
ENSG00000101144.12	BMP7	protein_coding	bone morphogenetic protein 7 [Source:HGNC Symbol;Acc:HGNC:1074]	1928.98	2168.49	1982.66	1976.03	2085.59	1722.73	1181.38	934.714	1005.96	731.366	642.673	735.965	30.28	23.52	25.25	18.82	16.3	18.48	871.997	-0.563876	0.110144	-5.11945	3.06428e-07	2.64778e-05
ENSG00000130723.18	PRRC2B	protein_coding	proline rich coiled-coil 2B [Source:HGNC Symbol;Acc:HGNC:28121]	4827.17	4203.23	4458.13	4556.03	4712.92	4388.6	12954.1	13093.1	13068.1	10778.2	9948.21	11033.6	144.94	143.76	143.16	121.03	110.05	120.92	11812.6	-0.30026	0.0588504	-5.10209	3.35914e-07	2.88359e-05
ENSG00000196562.14	SULF2	protein_coding	sulfatase 2 [Source:HGNC Symbol;Acc:HGNC:20392]	2413.99	2376.54	2387.81	2398.06	2361.96	2389.16	50509	50352.8	46435.7	38922.1	41823	37951.6	1069.61	1046.52	962.88	827.36	875.75	787.29	44332.6	-0.311625	0.0611422	-5.09673	3.45573e-07	2.94724e-05
ENSG00000257923.9	CUX1	protein_coding	cut like homeobox 1 [Source:HGNC Symbol;Acc:HGNC:2557]	4152.01	3674.08	3888.08	3772.04	3742.76	3944.58	8923.89	9497.88	9417.45	7627.01	7690.77	7566.46	116.95	122.14	120.82	100.32	99.63	97.13	8453.95	-0.28286	0.055695	-5.07873	3.7997e-07	3.2197e-05
ENSG00000138119.16	MYOF	protein_coding	myoferlin [Source:HGNC Symbol;Acc:HGNC:3656]	4935.84	4991.59	5073.39	4925.43	4962.71	5039.61	10509.6	12239.7	11425.2	13809.5	15128.6	14563.8	106.55	121.79	113.42	140.53	151.66	144.63	12946	0.348104	0.0687445	5.06374	4.11113e-07	3.46126e-05
ENSG00000185745.9	IFIT1	protein_coding	interferon induced protein with tetratricopeptide repeats 1 [Source:HGNC Symbol;Acc:HGNC:5407]	1723.97	1713.9	1714.78	1716.61	1717.42	1713.97	10838.7	13605.3	11498.3	16964.6	17918.6	14566.6	319.26	393.31	331.63	501.57	521.88	420.3	14232	0.460144	0.0909644	5.05851	4.2255e-07	3.53488e-05
ENSG00000117009.11	KMO	protein_coding	kynurenine 3-monooxygenase [Source:HGNC Symbol;Acc:HGNC:6381]	1736.85	1266.4	1505	1274.89	1289.87	1743.68	18.9497	59.8842	44.7297	122.622	138.14	120.644	0.67	2.04	1.53	4.28	4.75	4.1	84.1671	1.66103	0.328567	5.05537	4.29546e-07	3.57067e-05
ENSG00000134324.11	LPIN1	protein_coding	lipin 1 [Source:HGNC Symbol;Acc:HGNC:13345]	4244.23	3929.65	4444.11	4406.28	4150.02	4231.48	522.198	526.973	477.398	803.598	701.017	715.388	6.24	6.17	5.58	9.64	8.29	8.38	624.492	0.544794	0.107825	5.05258	4.35893e-07	3.60064e-05
ENSG00000214114.8	MYCBP	protein_coding	MYC binding protein [Source:HGNC Symbol;Acc:HGNC:7554]	1239.86	1199.58	1177.99	1517.64	1478.51	1493.03	1432.87	1779.77	1841.43	1157.1	1224.83	1191.02	53.94	65.76	67.89	43.74	45.61	43.92	1437.84	-0.500321	0.0992442	-5.04131	4.62344e-07	3.79527e-05
ENSG00000101115.12	SALL4	protein_coding	spalt like transcription factor 4 [Source:HGNC Symbol;Acc:HGNC:15924]	2939.78	3058	3611.48	2709.58	3074.01	2940.86	332.555	341.71	238.129	669.822	449.032	520.752	5.53	5.56	3.88	11.17	7.38	8.48	425.279	0.851682	0.169293	5.03083	4.88364e-07	3.98396e-05
ENSG00000116984.12	MTR	protein_coding	5-methyltetrahydrofolate-homocysteine methyltransferase [Source:HGNC Symbol;Acc:HGNC:7468]	8213.98	7658.17	7127.3	7709.1	7119.36	7483.3	1669.09	1946.16	2034.45	1383.32	1320.16	1422.59	11.19	12.81	13.36	9.31	8.75	9.34	1629.34	-0.45188	0.0899687	-5.02264	5.09666e-07	4.13207e-05
ENSG00000186480.12	INSIG1	protein_coding	insulin induced gene 1 [Source:HGNC Symbol;Acc:HGNC:6083]	2473.07	2515.85	2575.23	2434.31	2419.01	2420.53	2584.13	2162.26	2409.54	3696.79	3028.47	3121.82	52.86	43.4	48.25	75.9	61.25	62.55	2833.84	0.460056	0.0917444	5.01454	5.31595e-07	4.28341e-05
ENSG00000118564.14	FBXL5	protein_coding	F-box and leucine rich repeat protein 5 [Source:HGNC Symbol;Acc:HGNC:13602]	2344.61	2318.52	2296.3	2505.27	2463.72	2271.49	1122.56	1302.54	1404.8	897.598	834.485	949.079	24.01	27.33	29.41	19.26	17.64	19.88	1085.19	-0.512941	0.102413	-5.00857	5.48346e-07	4.39145e-05
ENSG00000165949.12	IFI27	protein_coding	interferon alpha inducible protein 27 [Source:HGNC Symbol;Acc:HGNC:5397]	318.834	311.426	315.985	315.866	315.06	314.673	14423.8	13873.1	11576.3	18334.3	18390.2	16328.9	2313.27	2183.65	1817.94	2951.56	2916.29	2565.35	15487.7	0.411896	0.0828046	4.97432	6.5478e-07	5.21205e-05
ENSG00000130303.12	BST2	protein_coding	bone marrow stromal cell antigen 2 [Source:HGNC Symbol;Acc:HGNC:1119]	825.498	816.301	827.492	832.432	829.779	831.619	3735.13	3748.52	3591.46	4470.96	4688.25	4486.13	228.34	224.9	214.98	274.36	283.4	268.65	4120.07	0.300823	0.060625	4.96203	6.9761e-07	5.51952e-05
ENSG00000197043.13	ANXA6	protein_coding	annexin A6 [Source:HGNC Symbol;Acc:HGNC:544]	1955.38	2082.25	2049.29	2007.2	2034.8	1973.7	697.955	648.506	754.439	954.193	942.879	1130.81	17.5	15.96	18.52	24.02	23.38	27.77	854.782	0.528237	0.106692	4.95105	7.38138e-07	5.80522e-05
ENSG00000100154.14	TTC28	protein_coding	tetratricopeptide repeat domain 28 [Source:HGNC Symbol;Acc:HGNC:29179]	9020.99	8087.92	7547.45	8342.31	8696.37	6974.36	318.546	301.149	336.154	191.506	173.825	204.436	1.99	1.86	2.06	1.2	1.08	1.25	254.231	-0.743843	0.150627	-4.93833	7.87955e-07	6.16012e-05
ENSG00000084628.9	NKAIN1	protein_coding	sodium/potassium transporting ATPase interacting 1 [Source:HGNC Symbol;Acc:HGNC:25743]	2240.63	2369.16	2346.65	2371.83	2295.85	2322.87	3501.3	3447.66	3214.62	2390.7	2863.29	2450.76	76.19	73.63	68.49	52.21	61.6	52.24	2978.09	-0.401352	0.0813061	-4.93631	7.9616e-07	6.18744e-05
ENSG00000105499.13	PLA2G4C	protein_coding	phospholipase A2 group IVC [Source:HGNC Symbol;Acc:HGNC:9037]	1275.15	1347.59	1316.78	1116.34	1347.21	1218.62	168.177	214.203	163.023	293.983	325.375	323.681	6.69	8.38	6.37	11.78	12.83	12.64	248.086	0.796785	0.161496	4.93377	8.06559e-07	6.23138e-05
ENSG00000038532.14	CLEC16A	protein_coding	C-type lectin domain containing 16A [Source:HGNC Symbol;Acc:HGNC:29013]	3739.49	3946.36	3813.49	3823.04	3862.3	4064.83	1175.22	1010.89	1067.38	795.723	792.189	780.672	15.34	12.94	13.64	10.43	10.23	9.98	937.01	-0.458873	0.0933057	-4.91796	8.74526e-07	6.71697e-05
ENSG00000183044.11	ABAT	protein_coding	4-aminobutyrate aminotransferase [Source:HGNC Symbol;Acc:HGNC:23]	4523.28	4513.39	4553.68	4503.32	4511.54	4503.33	6670.27	6444.41	6434.43	8196.14	7596.39	8053.56	74.67	70.79	70.52	92.07	84.07	88.29	7232.47	0.286741	0.058455	4.90533	9.32705e-07	7.12218e-05
ENSG00000214967.5	NPIPA7	protein_coding	nuclear pore complex interacting protein family member A7 [Source:HGNC Symbol;Acc:HGNC:41982]	396.239	418.105	406.399	434.771	492.577	418.485	148.087	150.311	115.359	73.8053	33.8032	50.7992	17.56	17.52	13.4	8.83	4.01	5.86	95.362	-1.37869	0.282088	-4.88743	1.02161e-06	7.75599e-05
ENSG00000136603.13	SKIL	protein_coding	SKI like proto-oncogene [Source:HGNC Symbol;Acc:HGNC:10897]	3996.35	4234.83	4377.87	4274.25	3985.34	3999.39	3105.54	3553.66	3316.21	2518.28	2735.37	2481.71	37.92	42.59	39.66	30.86	33.02	29.68	2951.84	-0.368108	0.0753513	-4.88523	1.03309e-06	7.79802e-05
ENSG00000240065.7	PSMB9	protein_coding	proteasome subunit beta 9 [Source:HGNC Symbol;Acc:HGNC:9546]	624.638	611.174	614.818	612.897	618.833	619.765	447.742	385.466	359.818	714.908	644.003	536.673	36.69	31.01	28.89	58.8	52.2	43.1	514.751	0.664983	0.136159	4.88387	1.04026e-06	7.8073e-05
ENSG00000281991.1	TMEM265	protein_coding	transmembrane protein 265 [Source:HGNC Symbol;Acc:HGNC:51241]	816.54	809.37	812.72	813.74	813.2	812.97	182.888	256.098	219.852	340.298	410.366	372.505	11.36	15.6	13.4	21.23	25.26	22.68	296.999	0.771979	0.158241	4.87851	1.06888e-06	7.9765e-05
ENSG00000188153.12	COL4A5	protein_coding	collagen type IV alpha 5 chain [Source:HGNC Symbol;Acc:HGNC:2207]	5035.33	4916.9	4175.96	4121.13	4220.4	4720.52	826.956	1153.15	1096.34	628.752	747.398	495.461	9.27	12.66	12.02	7.07	8.28	5.43	824.685	-0.722464	0.148257	-4.87304	1.09895e-06	8.15457e-05
ENSG00000106785.14	TRIM14	protein_coding	tripartite motif containing 14 [Source:HGNC Symbol;Acc:HGNC:16283]	4104.87	4098.69	4181.7	4146.78	4071.94	4149.89	2287.79	2440.48	2339.13	2942.51	3131.6	2860.59	28.04	29.36	28.07	36.21	37.95	34.35	2667.04	0.33775	0.0693376	4.87109	1.10984e-06	8.18916e-05
ENSG00000154124.4	OTULIN	protein_coding	OTU deubiquitinase with linear linkage specificity [Source:HGNC Symbol;Acc:HGNC:25118]	3602.95	4034.69	3789.51	3138.09	4714.73	3822.76	1458.73	1328.62	1478.85	1157.94	772.266	902.296	19.3	17.25	19.15	15.37	10.11	11.69	1183.06	-0.594061	0.122349	-4.85544	1.20119e-06	8.81368e-05
ENSG00000197903.7	HIST1H2BK	protein_coding	histone cluster 1 H2B family member k [Source:HGNC Symbol;Acc:HGNC:13954]	203.14	196.26	199.43	200.41	199.87	199.7	1757.43	1331.02	1525.33	2093.88	2048.62	2303.56	444.79	330.75	377.96	532.08	512.58	571.05	1843.29	0.481863	0.0992737	4.85389	1.21065e-06	8.83369e-05
ENSG00000077150.18	NFKB2	protein_coding	nuclear factor kappa B subunit 2 [Source:HGNC Symbol;Acc:HGNC:7795]	2469.83	2432.97	2353.16	2418.7	2546.53	2473.75	1557.95	1500.52	1412.3	1909.77	1892.86	1946.69	32.18	30.41	28.56	39.6	38.65	39.38	1703.33	0.363329	0.0749775	4.84584	1.26077e-06	9.14861e-05
ENSG00000173588.14	CEP83	protein_coding	centrosomal protein 83 [Source:HGNC Symbol;Acc:HGNC:17966]	2143.45	2285.6	2058.78	2229.39	2239	2115.08	548.621	557.963	595.81	399.732	368.985	395.146	12.75	12.73	13.56	9.3	8.47	8.99	477.772	-0.549084	0.113582	-4.83426	1.33641e-06	9.64419e-05
ENSG00000155974.11	GRIP1	protein_coding	glutamate receptor interacting protein 1 [Source:HGNC Symbol;Acc:HGNC:18708]	2197.04	1866.72	2476.2	3091.53	2134.9	2628.06	305.176	412.431	309.647	178.546	213.406	197.205	6.52	8.65	6.47	3.83	4.5	4.12	269.415	-0.800768	0.165822	-4.82909	1.37157e-06	9.84385e-05
ENSG00000168702.17	LRP1B	protein_coding	LDL receptor related protein 1B [Source:HGNC Symbol;Acc:HGNC:6693]	12266.4	12107.7	9244.82	14179.7	13996.7	11147.3	134.034	130.633	178.519	75.6803	65.9483	52.0248	0.56	0.54	0.74	0.32	0.27	0.22	106.177	-1.19371	0.247743	-4.81833	1.44765e-06	0.000103334
ENSG00000138780.14	GSTCD	protein_coding	glutathione S-transferase C-terminal domain containing [Source:HGNC Symbol;Acc:HGNC:25806]	2990.75	3260.45	2913.67	3716.19	3134.16	3662.59	776.408	706.905	910.086	501.259	591.617	514.818	12.03	10.75	13.8	7.79	9.05	7.81	666.826	-0.579788	0.120402	-4.81542	1.46888e-06	0.000104283
ENSG00000158373.8	HIST1H2BD	protein_coding	histone cluster 1 H2B family member d [Source:HGNC Symbol;Acc:HGNC:4747]	543.98	560.698	558.184	553.345	571.634	552.127	1779.27	1766.93	1818.92	2186.19	2233.98	2405.13	161.65	157.55	161.81	199.37	200.69	214.05	2031.73	0.347988	0.072423	4.80494	1.54801e-06	0.00010931
ENSG00000272405.1	AL365181.3	antisense_RNA		3043.54	3036.37	3039.72	3040.74	3040.2	3039.97	206.954	216.669	176.815	298.607	344.474	360.214	3.44	3.54	2.88	4.99	5.66	5.87	267.287	0.745383	0.155246	4.8013	1.57637e-06	0.000110717
ENSG00000158406.4	HIST1H4H	protein_coding	histone cluster 1 H4 family member h [Source:HGNC Symbol;Acc:HGNC:4788]	1010	1004.37	1011.7	989.88	1011.94	988.283	1067.92	1479.43	1347.65	1644.29	2138.59	2018.59	53.86	73.23	66.55	83.24	106.65	99.73	1616.07	0.57538	0.120006	4.79458	1.63017e-06	0.000113886
ENSG00000165219.21	GAPVD1	protein_coding	GTPase activating protein and VPS9 domains 1 [Source:HGNC Symbol;Acc:HGNC:23375]	4852.85	4919.22	4648.12	4772.42	4892.13	5005.66	2613.42	2889.21	2981.63	2290.34	2173.2	2160.74	27.27	29.59	30.45	23.98	22.42	22.07	2518.12	-0.357473	0.0747521	-4.78211	1.73467e-06	0.000120546
ENSG00000117724.12	CENPF	protein_coding	centromere protein F [Source:HGNC Symbol;Acc:HGNC:1857]	5240.57	4914.31	5159.91	5601.46	4685.31	5110.27	5138.86	5432.08	5615.88	4096.51	4614.99	4145.64	50.85	52.74	54.41	40.68	45.16	40.19	4840.64	-0.333493	0.0697596	-4.78061	1.74768e-06	0.000120811
ENSG00000204592.8	HLA-E	protein_coding	major histocompatibility complex, class I, E [Source:HGNC Symbol;Acc:HGNC:4962]	2239.66	2223.48	2224.55	2237.7	2222.96	2213.62	4273.25	4498.3	4098.8	5399.5	5707.78	5064.18	97.03	100.25	91.13	123.08	128.17	112.65	4840.29	0.328971	0.0688636	4.77714	1.77805e-06	0.000122267
ENSG00000155229.20	MMS19	protein_coding	MMS19 homolog, cytosolic iron-sulfur assembly component [Source:HGNC Symbol;Acc:HGNC:13824]	1917.83	1781.58	2048.27	1936.23	1949.8	2140.56	2282.95	2397.24	2001.61	1763.28	1673.95	1570.66	58.92	60.72	50.58	45.67	42.72	39.71	1948.3	-0.415648	0.0870341	-4.77569	1.79095e-06	0.000122512
ENSG00000113810.15	SMC4	protein_coding	structural maintenance of chromosomes 4 [Source:HGNC Symbol;Acc:HGNC:14013]	3068.16	2798.82	2869.35	3110.88	2911.26	3023.79	6683.58	7800.04	7690.46	6036.57	5849.37	5283.07	114.13	130.71	128.58	103.45	98.75	88.36	6557.26	-0.369527	0.0774145	-4.77335	1.81183e-06	0.000123125
ENSG00000131747.14	TOP2A	protein_coding	topoisomerase (DNA) II alpha [Source:HGNC Symbol;Acc:HGNC:11989]	4076.52	4270.64	4167.07	4184.82	4159.8	4237.58	9508.74	9395.8	10249.2	8350.21	7580.42	7174.48	114.96	111.5	121.34	101.34	90.62	84.98	8709.83	-0.335966	0.0703949	-4.7726	1.81866e-06	0.000123125
ENSG00000117226.11	GBP3	protein_coding	guanylate binding protein 3 [Source:HGNC Symbol;Acc:HGNC:4184]	2484.19	2133.96	2541	2326.68	2570.83	2357	1225.94	1686.63	1253.4	2019.26	2085.68	1883.45	25.85	34.9	25.88	42.75	43.5	38.92	1692.43	0.526725	0.110823	4.75285	2.0057e-06	0.000135091
ENSG00000119922.9	IFIT2	protein_coding	interferon induced protein with tetratricopeptide repeats 2 [Source:HGNC Symbol;Acc:HGNC:5409]	3245.16	3198	3142.81	3169.06	3145.44	3208.91	1316.75	1617.97	1424.82	2056.74	2354.3	1785.78	20.91	25.21	22.15	32.78	36.96	27.78	1759.39	0.506181	0.106592	4.74875	2.04674e-06	0.000137152
ENSG00000130164.13	LDLR	protein_coding	low density lipoprotein receptor [Source:HGNC Symbol;Acc:HGNC:6547]	3450.24	3521.46	3209.6	3371.11	3424.47	3505.76	3226.53	2471.23	3111.72	3995.24	3822.65	4092.51	47.81	35.93	45.15	59.44	56.02	59.41	3453.37	0.434778	0.0918256	4.73482	2.1925e-06	0.000146174
ENSG00000141424.12	SLC39A6	protein_coding	solute carrier family 39 member 6 [Source:HGNC Symbol;Acc:HGNC:18607]	3030.35	3184.45	3212.29	3102.1	3129.08	3013.79	32917.6	40958.6	34621.5	46965.7	53163	44070.6	535.02	653.37	551	766.25	854.41	701.67	42116.1	0.41029	0.0867298	4.73067	2.23777e-06	0.000148439
ENSG00000105974.11	CAV1	protein_coding	caveolin 1 [Source:HGNC Symbol;Acc:HGNC:1527]	2202.6	2261.96	2400.59	2160.53	2184.52	1767.82	314.94	315.002	271.267	205.623	151.239	156.224	7.4	7.26	6.24	4.84	3.51	3.6	235.72	-0.80868	0.17106	-4.72746	2.27344e-06	0.000150047
ENSG00000197457.9	STMN3	protein_coding	stathmin 3 [Source:HGNC Symbol;Acc:HGNC:15926]	2077.86	2071.27	2075.91	2077.85	2073.2	2052.04	686.356	549.527	529.211	342.715	400.643	395.741	16.76	13.17	12.65	8.4	9.67	9.46	484.041	-0.632912	0.13425	-4.71441	2.42413e-06	0.000159192
ENSG00000006831.9	ADIPOR2	protein_coding	adiponectin receptor 2 [Source:HGNC Symbol;Acc:HGNC:24041]	3753.06	3725.3	3781.6	3771.39	3694.24	3774.57	3520.14	4167.34	4336.08	5035.65	5333.94	5257.32	47.47	55.16	57.26	68.17	71.12	69.45	4608.4	0.378046	0.0802091	4.71325	2.43793e-06	0.000159302
ENSG00000256514.1	AP003419.2	protein_coding		532.58	525.4	528.76	529.77	529.23	529	108.764	49.0642	115.738	199.585	235.439	202.607	10.42	4.6	10.83	19.1	22.26	18.98	151.863	1.20523	0.255828	4.71112	2.46362e-06	0.000160184
ENSG00000125826.20	RBCK1	protein_coding	RANBP2-type and C3HC4-type zinc finger containing 1 [Source:HGNC Symbol;Acc:HGNC:15864]	1317.44	1329.21	1308.36	1293.14	1334.21	1347.87	2114.7	1900.42	1961.04	2538.55	2520.54	2485.04	80.91	71.37	73.47	97.5	95.36	93.14	2253.38	0.335288	0.071298	4.70262	2.56842e-06	0.000166176
ENSG00000234745.10	HLA-B	protein_coding	major histocompatibility complex, class I, B [Source:HGNC Symbol;Acc:HGNC:4932]	774.034	774.533	849.293	758.873	779.439	827.593	2124.38	2287.27	1705.39	4797.86	4093.68	3170.1	135.42	143.1	106.44	306.97	258.03	197.96	3029.79	0.979585	0.208357	4.70148	2.58284e-06	0.000166289
ENSG00000188313.12	PLSCR1	protein_coding	phospholipid scramblase 1 [Source:HGNC Symbol;Acc:HGNC:9092]	1143.81	1162.08	1085.31	1038.57	1031.24	1065.8	2725.69	2732.44	2746.24	3890.6	3635.75	3157.07	126.84	124.79	125.13	181.73	167.28	143.9	3147.95	0.379593	0.0809745	4.68781	2.76143e-06	0.00017692
ENSG00000115919.14	KYNU	protein_coding	kynureninase [Source:HGNC Symbol;Acc:HGNC:6469]	1363.69	1321.53	1308.89	1361.54	1325.08	1334.31	4652.41	5663.86	5549.8	6604.09	7060.15	6786.27	176.18	210.41	205.71	250.93	264.27	251.63	6052.65	0.36608	0.0782945	4.67568	2.92975e-06	0.000186793
ENSG00000138613.13	APH1B	protein_coding	aph-1 homolog B, gamma-secretase subunit [Source:HGNC Symbol;Acc:HGNC:24080]	1645.4	1378.21	1465.14	1369.98	1252.51	1350.04	282.786	404.299	333.56	537.739	606.869	491.365	10.17	14.29	11.76	19.44	21.6	17.32	442.79	0.683031	0.146213	4.67149	2.99018e-06	0.000189724
ENSG00000115109.13	EPB41L5	protein_coding	erythrocyte membrane protein band 4.1 like 5 [Source:HGNC Symbol;Acc:HGNC:19819]	2353.19	2397.83	2425.13	2488.4	2506.42	2454	2647.82	3095.19	2996.04	3619.34	3647.65	3887.6	54.95	63.04	60.87	75.39	74.84	79.02	3315.58	0.352863	0.0756604	4.66377	3.1047e-06	0.000196044
ENSG00000184985.16	SORCS2	protein_coding	sortilin related VPS10 domain containing receptor 2 [Source:HGNC Symbol;Acc:HGNC:16698]	2753.36	4888.51	3999.05	3943.54	2345.64	5627.97	125.849	67.0084	85.3238	31.7107	38.7728	15.2579	1.7	0.88	1.13	0.43	0.52	0.2	60.7132	-1.78415	0.382915	-4.65938	3.17167e-06	0.000199315
ENSG00000107262.19	BAG1	protein_coding	BCL2 associated athanogene 1 [Source:HGNC Symbol;Acc:HGNC:937]	1125.72	1109.92	1086.62	1087.05	1100.29	1090.64	1958.15	2598.23	2426.03	2897.14	3535.27	3300.77	90.01	117.23	109.2	133.69	160.7	148.64	2785.94	0.479513	0.103028	4.65419	3.25256e-06	0.000203424
ENSG00000204580.13	DDR1	protein_coding	discoidin domain receptor tyrosine kinase 1 [Source:HGNC Symbol;Acc:HGNC:2730]	2353.37	2284.4	2322.86	2359.7	2361.14	2393.16	18794.9	18708.6	17280.3	21141.2	23382.4	22328.1	405.18	395.85	364.79	457.52	498.43	471.55	20272.5	0.287143	0.061874	4.64077	3.47113e-06	0.000216066
ENSG00000178685.13	PARP10	protein_coding	poly(ADP-ribose) polymerase family member 10 [Source:HGNC Symbol;Acc:HGNC:25895]	2396.95	2351.56	2408.88	2546.58	2418.17	2331.31	4056.43	3409.74	2947.33	4710.57	4814.47	4634.04	85.2	70.27	60.61	99.3	99.97	95.32	4095.4	0.443084	0.0957184	4.62904	3.67364e-06	0.000227592
ENSG00000205133.11	TRIQK	protein_coding	triple QxxK/R motif containing [Source:HGNC Symbol;Acc:HGNC:27828]	1970.66	2199.43	1985.42	1905.03	1892.52	1881.36	1448.59	1471.15	1698.06	1185.16	1165.14	1129.54	37.18	37.07	42.68	30.55	29.57	28.41	1349.58	-0.409188	0.0885344	-4.62179	3.80435e-06	0.000234583
ENSG00000165490.12	DDIAS	protein_coding	DNA damage induced apoptosis suppressor [Source:HGNC Symbol;Acc:HGNC:26351]	2531.45	2227.3	2509.93	2610.85	2684.65	2616.87	936.089	1110.06	1010.05	792.989	727.93	678.739	18.74	21.82	19.81	15.93	14.41	13.31	876.007	-0.474452	0.102941	-4.60896	4.04685e-06	0.000248371
ENSG00000141736.13	ERBB2	protein_coding	erb-b2 receptor tyrosine kinase 2 [Source:HGNC Symbol;Acc:HGNC:3430]	3821.63	3803.31	3578.7	3791.6	3687.39	3665.29	2173.01	2007.77	2236.65	2537.5	2792.47	2936.58	29.51	26.76	29.74	34.59	37.5	39.06	2447.32	0.364932	0.0792647	4.60396	4.14531e-06	0.00025323
ENSG00000168961.16	LGALS9	protein_coding	galectin 9 [Source:HGNC Symbol;Acc:HGNC:6570]	799.451	715.293	731.012	843.15	753.541	754.964	191.347	162.384	205.776	282.703	397.565	301.28	12.65	10.55	13.33	18.78	25.98	19.53	256.845	0.799368	0.173804	4.59926	4.23986e-06	0.000257807
ENSG00000186174.12	BCL9L	protein_coding	B-cell CLL/lymphoma 9 like [Source:HGNC Symbol;Acc:HGNC:23688]	4683.16	5008.1	4574.59	4330.66	4811	4743.14	10045.8	8145.87	9137.45	11538.3	11164.4	12293.4	108.38	86.25	96.53	124.94	119.1	129.93	10387.5	0.356683	0.0776355	4.59432	4.34155e-06	0.000262774
ENSG00000108375.12	RNF43	protein_coding	ring finger protein 43 [Source:HGNC Symbol;Acc:HGNC:18505]	4423.57	4074.58	4047.73	4501.5	4204.51	4110.22	2058.49	2163.25	2289.47	2571.4	2818.32	3128.84	24.65	25.42	26.84	30.91	33.36	36.69	2504.95	0.3883	0.0847373	4.5824	4.5967e-06	0.000276941
ENSG00000138496.16	PARP9	protein_coding	poly(ADP-ribose) polymerase family member 9 [Source:HGNC Symbol;Acc:HGNC:24118]	3004.7	3029.3	2994.45	2878.48	2903.68	2909.07	5227.91	5601.32	5132.12	7170	7147.01	6056.09	89.53	94.14	86.05	123.24	121.03	101.59	6055.73	0.351509	0.0767673	4.57889	4.67449e-06	0.000280341
ENSG00000117228.9	GBP1	protein_coding	guanylate binding protein 1 [Source:HGNC Symbol;Acc:HGNC:4182]	2421.72	2326.15	2406.38	2445.14	2337.56	2338.75	711.872	918.82	752.16	1203.05	1232.46	1006.07	15.14	19.18	15.64	25.67	25.91	20.94	970.752	0.530864	0.116135	4.57109	4.85186e-06	0.000287046
ENSG00000154654.14	NCAM2	protein_coding	neural cell adhesion molecule 2 [Source:HGNC Symbol;Acc:HGNC:7657]	3713.74	3745.24	3666.9	2890.36	3166.41	3447.78	471.203	583.047	597.718	802.91	814.695	758.26	6.95	8.45	8.64	11.91	11.9	10.97	671.346	0.52377	0.114576	4.57138	4.84512e-06	0.000287046
ENSG00000164850.14	GPER1	protein_coding	G protein-coupled estrogen receptor 1 [Source:HGNC Symbol;Acc:HGNC:4485]	2467.88	2358.99	2401.23	2416.91	2442.27	2386.33	1454.62	1263.89	1453.05	1861.3	1691.78	2063.92	30.5	26	29.83	39.17	35.07	42.39	1631.43	0.429772	0.0939881	4.57262	4.81652e-06	0.000287046
ENSG00000101210.10	EEF1A2	protein_coding	eukaryotic translation elongation factor 1 alpha 2 [Source:HGNC Symbol;Acc:HGNC:3192]	1703.96	1736.05	1738.05	1717.64	1707.01	1711.04	33602.5	29716.9	29629	36220.7	38627.8	40481.8	988.52	857.98	853.48	1069.58	1123.63	1166.58	34713	0.311198	0.0681296	4.56773	4.93025e-06	0.000290376
ENSG00000131781.12	FMO5	protein_coding	flavin containing monooxygenase 5 [Source:HGNC Symbol;Acc:HGNC:3773]	2179.58	1897.52	1958.98	1792.41	2001.73	2009.45	140.639	208.179	181.091	302.252	320.451	286.635	3.61	5.24	4.56	7.79	8.14	7.21	239.871	0.78448	0.171978	4.56152	5.07843e-06	0.000297768
ENSG00000183742.12	MACC1	protein_coding	MACC1, MET transcriptional regulator [Source:HGNC Symbol;Acc:HGNC:30215]	6121.63	4537.94	5033.4	6233.59	6210.85	7435.72	139.301	239.709	172.954	93.8338	91.323	75.2375	1.2	2.04	1.46	0.82	0.78	0.63	135.46	-1.0827	0.237685	-4.55518	5.2341e-06	0.000305532
ENSG00000071539.13	TRIP13	protein_coding	thyroid hormone receptor interactor 13 [Source:HGNC Symbol;Acc:HGNC:12307]	2284.62	2072.23	2181.25	2176.81	2255.1	2298.89	1147.44	1185.42	1202.85	931.528	879.635	903.016	26.26	26.62	26.94	21.4	19.9	20.24	1041.65	-0.380917	0.0839067	-4.53976	5.6317e-06	0.000322999
ENSG00000071553.16	ATP6AP1	protein_coding	ATPase H+ transporting accessory protein 1 [Source:HGNC Symbol;Acc:HGNC:868]	1907.4	1918.87	1908.82	1909.86	1906.02	1910.49	9552.1	8592.42	8976.84	10588.8	10995.4	11488.1	252.86	223.23	232.69	281.37	287.8	297.9	10032.2	0.286085	0.062994	4.54147	5.5863e-06	0.000322999
ENSG00000115415.18	STAT1	protein_coding	signal transducer and activator of transcription 1 [Source:HGNC Symbol;Acc:HGNC:11362]	3815.42	3843.88	3828.79	3798.96	3816.8	3791.78	21333.1	23720.1	22406.8	29053.9	28060.9	25764.8	282.71	308.5	290.74	386.48	367.7	334.45	25056.6	0.296851	0.06538	4.5404	5.61489e-06	0.000322999
ENSG00000132669.12	RIN2	protein_coding	Ras and Rab interactor 2 [Source:HGNC Symbol;Acc:HGNC:18750]	2106.22	1505.72	2664.73	4067.61	1991.05	2451.9	61.5405	97.1974	42.959	13.647	23.8093	17.2119	1.31	2.05	0.91	0.3	0.51	0.37	42.6069	-1.89186	0.416582	-4.5414	5.58828e-06	0.000322999
ENSG00000121060.16	TRIM25	protein_coding	tripartite motif containing 25 [Source:HGNC Symbol;Acc:HGNC:12932]	3398.59	3428.35	3501.06	3125.39	3276.22	3323.11	10779.8	10877.7	10294.3	13463.7	12788	12259.4	163.21	161.64	152.61	204.62	191.44	181.83	11743.8	0.269258	0.0593398	4.53756	5.69102e-06	0.000324982
ENSG00000197157.10	SND1	protein_coding	staphylococcal nuclease and tudor domain containing 1 [Source:HGNC Symbol;Acc:HGNC:30646]	2977.82	3037.41	2922.02	2908.28	3038.03	3096.39	7874.56	7234.87	7931.54	6504.23	6124.06	6324.57	132.92	119.86	131.08	110.2	102.21	104.56	6998.98	-0.282024	0.0622239	-4.5324	5.83161e-06	0.000331569
ENSG00000128335.13	APOL2	protein_coding	apolipoprotein L2 [Source:HGNC Symbol;Acc:HGNC:619]	2146.23	2088.87	2213.46	2050.34	2101.91	2102.01	977.881	1201.96	997.713	1385.19	1579.93	1389.06	23.37	28.18	23.34	33.22	37.32	32.51	1255.26	0.454979	0.100436	4.53004	5.89728e-06	0.000333857
ENSG00000093010.13	COMT	protein_coding	catechol-O-methyltransferase [Source:HGNC Symbol;Acc:HGNC:2228]	813.316	813.778	811.402	810.17	799.701	790.536	1387.82	1199.14	1343.29	1604.11	1732.87	2025.53	87.04	73.81	82.48	100.97	107.45	124.41	1548.76	0.448551	0.0991867	4.52229	6.11746e-06	0.000344836
ENSG00000111667.13	USP5	protein_coding	ubiquitin specific peptidase 5 [Source:HGNC Symbol;Acc:HGNC:12628]	2776.59	2683.92	2652.95	2691.44	2746.08	2661.94	3381.53	3246.01	3531.12	2727.5	2678.34	2836.86	63.28	59.63	64.71	51.24	49.57	52.01	3066.89	-0.301371	0.0667057	-4.51793	6.24482e-06	0.000350511
ENSG00000082482.13	KCNK2	protein_coding	potassium two pore domain channel subfamily K member 2 [Source:HGNC Symbol;Acc:HGNC:6277]	2440.22	2446.54	2426.73	2489.62	2634.2	2643.44	577.412	725.867	727.699	906.177	971.343	979.462	11.63	14.34	14.35	18.31	19.34	19.31	814.651	0.493296	0.109509	4.5046	6.64979e-06	0.000371653
ENSG00000197296.5	FITM2	protein_coding	fat storage inducing transmembrane protein 2 [Source:HGNC Symbol;Acc:HGNC:16135]	4418.54	4411.37	4414.72	4415.74	4415.2	4414.97	599.383	649.761	662.617	431.828	454.818	471.295	6.86	7.3	7.43	4.96	5.15	5.29	544.953	-0.492285	0.109316	-4.50331	6.6903e-06	0.000372332
ENSG00000092929.11	UNC13D	protein_coding	unc-13 homolog D [Source:HGNC Symbol;Acc:HGNC:23147]	3320.34	3542.23	3731.11	3350.54	3539.53	3388.33	1053.2	889.413	843.494	1287.28	1169.46	1473.81	15.32	12.71	12.02	18.8	16.82	21.01	1119.44	0.499403	0.11109	4.4955	6.94081e-06	0.000383269
ENSG00000143179.14	UCK2	protein_coding	uridine-cytidine kinase 2 [Source:HGNC Symbol;Acc:HGNC:12562]	1904.92	1983.12	1952.23	1969.7	1980.77	1988.49	2482.81	2271.06	2288.55	1959.38	1804.32	1811.77	63.96	57.42	57.72	50.67	45.95	45.71	2103.01	-0.337376	0.0750498	-4.49536	6.94519e-06	0.000383269
ENSG00000176890.15	TYMS	protein_coding	thymidylate synthetase [Source:HGNC Symbol;Acc:HGNC:12441]	1147.26	1104.18	1108.09	1175.8	1146.72	1192.33	1792.82	1856.79	2077.44	1505.87	1493.14	1447.49	79.16	80.46	89.81	66.72	65.21	62.59	1695.6	-0.36645	0.0815437	-4.49391	6.99268e-06	0.000384275
ENSG00000069188.16	SDK2	protein_coding	sidekick cell adhesion molecule 2 [Source:HGNC Symbol;Acc:HGNC:19308]	9622.8	9065.74	9125.75	9189.86	9347.24	9239.93	1002.48	1026.89	877.177	662.771	768.146	673.101	5.48	5.5	4.69	3.64	4.14	3.6	835.068	-0.467473	0.10421	-4.4859	7.26072e-06	0.000397343
ENSG00000198355.4	PIM3	protein_coding	Pim-3 proto-oncogene, serine/threonine kinase [Source:HGNC Symbol;Acc:HGNC:19310]	2136.71	2137.9	2147.53	2154.16	2139.34	2147.13	1257.23	1110	1072.93	1428.43	1622.18	1520.1	29.66	25.7	24.78	33.82	37.84	35.13	1335.15	0.408797	0.0911771	4.48355	7.34118e-06	0.000400079
ENSG00000143641.9	GALNT2	protein_coding	polypeptide N-acetylgalactosaminyltransferase 2 [Source:HGNC Symbol;Acc:HGNC:4124]	4235.47	3990.83	3968.67	3928.13	4189.35	4087.38	1811.37	1905.38	1932.71	1494.26	1385.37	1549.9	22.54	23.26	23.54	18.65	17.04	18.88	1679.82	-0.348848	0.0778922	-4.47861	7.51315e-06	0.000407759
ENSG00000101361.16	NOP56	protein_coding	NOP56 ribonucleoprotein [Source:HGNC Symbol;Acc:HGNC:15911]	1070.93	1052.65	1073.24	1137.86	1145.21	1129.69	4547.47	4660.72	4525.57	3806.77	3674.04	3904.49	208.87	210.09	203.53	175.51	166.85	175.67	4186.53	-0.26974	0.0602511	-4.47692	7.57265e-06	0.000409297
ENSG00000226200.6	SGMS1-AS1	antisense_RNA	SGMS1 antisense RNA 1 [Source:HGNC Symbol;Acc:HGNC:49683]	12221.5	7940.86	12217.7	5622.91	4447.52	6136.96	42.9106	77.3334	50.3925	119.381	141.213	127.24	0.29	0.51	0.33	0.8	0.93	0.83	92.9617	1.19922	0.268111	4.47284	7.71867e-06	0.000415479
ENSG00000136048.13	DRAM1	protein_coding	DNA damage regulated autophagy modulator 1 [Source:HGNC Symbol;Acc:HGNC:25645]	2416.82	2608.85	2636.43	2663.81	2658.59	2752.01	1177.3	1250.83	1185.01	1614	1536.06	1474.73	22.72	23.69	22.38	31.26	29.31	27.87	1372.98	0.35581	0.0800715	4.44366	8.84426e-06	0.000474125
ENSG00000189171.14	S100A13	protein_coding	S100 calcium binding protein A13 [Source:HGNC Symbol;Acc:HGNC:10490]	401.752	403.407	401.182	397.579	390.235	406.524	1937.12	1903.48	2026.71	2430.34	2603.3	2332.72	244.87	236.08	250.8	308.38	325.29	288.81	2205.61	0.326064	0.0734578	4.4388	9.04639e-06	0.000482989
ENSG00000115866.10	DARS	protein_coding	aspartyl-tRNA synthetase [Source:HGNC Symbol;Acc:HGNC:2678]	1966.13	2016.01	2088.65	2043.12	1980.92	1966.65	2358.31	2603.49	2504.03	2048.1	1979.6	1969.01	59.33	64.29	61.69	51.73	49.25	48.53	2243.77	-0.315866	0.0712548	-4.43291	9.29704e-06	0.000493674
ENSG00000137513.9	NARS2	protein_coding	asparaginyl-tRNA synthetase 2, mitochondrial (putative) [Source:HGNC Symbol;Acc:HGNC:26274]	1643.61	1666.88	1643.26	1596.69	1623.08	1815.56	988.898	927.126	1044.49	766.682	754.357	633.832	30.07	27.66	31.09	23.39	22.68	18.87	852.568	-0.46423	0.104765	-4.43118	9.37193e-06	0.000493674
ENSG00000138760.9	SCARB2	protein_coding	scavenger receptor class B member 2 [Source:HGNC Symbol;Acc:HGNC:1665]	3333.19	3391.91	3335.84	3149.54	2920.21	3058	4887.24	5432.87	5426.28	6129.79	6800.21	6525.25	77.38	84.43	84.12	97.43	106.47	101.22	5866.94	0.304894	0.0688153	4.43061	9.39687e-06	0.000493674
ENSG00000196586.13	MYO6	protein_coding	myosin VI [Source:HGNC Symbol;Acc:HGNC:7605]	5221.72	5284.99	5381.79	4931.22	5179.13	4962.13	4076.77	4704.7	4505.65	5536.31	5586.65	5311.87	39.97	45.27	43.25	54.49	54.16	51.02	4953.68	0.306812	0.0692316	4.43167	9.35069e-06	0.000493674
ENSG00000060749.14	QSER1	protein_coding	glutamine and serine rich 1 [Source:HGNC Symbol;Acc:HGNC:26154]	6881.64	7154.43	7893.2	7506.9	7935.47	8309.7	2763.99	2888.95	2790.43	2370.47	2299.79	2136.62	18.39	18.86	18.19	15.84	15.13	13.93	2541.69	-0.31158	0.0703715	-4.42764	9.52716e-06	0.000498525
ENSG00000145386.9	CCNA2	protein_coding	cyclin A2 [Source:HGNC Symbol;Acc:HGNC:1578]	2618.54	2611.37	2614.72	2615.74	2615.2	2614.97	2274.26	2274.92	2475.45	1963.43	1811.17	1806.8	43.98	43.17	46.87	38.11	34.62	34.23	2101.01	-0.332495	0.0751458	-4.42466	9.65922e-06	0.000500606
ENSG00000149115.13	TNKS1BP1	protein_coding	tankyrase 1 binding protein 1 [Source:HGNC Symbol;Acc:HGNC:19081]	3463.79	3456.56	3276.12	2953.54	3280.37	3340.52	2397.17	2410.67	2354.09	2993.59	2931.85	2823.23	36.83	36.36	35.43	46.17	44.56	42.5	2651.75	0.287945	0.0650722	4.42501	9.64399e-06	0.000500606
ENSG00000170581.13	STAT2	protein_coding	signal transducer and activator of transcription 2 [Source:HGNC Symbol;Acc:HGNC:11363]	2019.32	2047.36	2176.83	2201.01	2112.59	2204.13	1987.61	2025.61	1606.94	2639.52	2781	2262.22	47.3	47.28	37.43	63.02	65.42	52.72	2217.16	0.450893	0.101916	4.42417	9.68127e-06	0.000500606
ENSG00000196502.11	SULT1A1	protein_coding	sulfotransferase family 1A member 1 [Source:HGNC Symbol;Acc:HGNC:11453]	1141.35	1138.54	1134.12	1112.77	1124.96	1066.96	861.689	768.693	715.172	1006.27	1104.76	1065.24	38.95	34.03	31.62	45.59	49.32	47.14	920.329	0.437148	0.0992219	4.40576	1.05414e-05	0.000542942
ENSG00000223573.6	TINCR	protein_coding	tissue differentiation-inducing non-protein coding RNA [Source:HGNC Symbol;Acc:HGNC:14607]	3168.04	3547.37	3404.02	3353.41	3551.2	3322.03	1020.9	963.182	1028.75	720.812	683.063	818.931	15.23	14.11	15.04	10.8	10.08	11.97	872.613	-0.435818	0.0989916	-4.40258	1.06973e-05	0.00054882
ENSG00000049759.17	NEDD4L	protein_coding	neural precursor cell expressed, developmentally down-regulated 4-like, E3 ubiquitin protein ligase [Source:HGNC Symbol;Acc:HGNC:7728]	2993.06	3035.02	2736.41	2497.68	2494	2793.66	455.553	463.012	544.651	663.619	734.489	674.585	8.38	8.35	9.82	12.27	13.36	12.15	589.353	0.499783	0.113903	4.38778	1.14513e-05	0.000585217
ENSG00000119950.20	MXI1	protein_coding	MAX interactor 1, dimerization protein [Source:HGNC Symbol;Acc:HGNC:7534]	2067.41	1862.83	2031.53	2015.51	1836.7	2214.28	582.244	613.295	571.144	430.849	436.807	388.184	14.71	15.21	14.13	10.93	10.92	9.61	503.755	-0.495802	0.113094	-4.38398	1.16528e-05	0.00059321
ENSG00000114573.9	ATP6V1A	protein_coding	ATPase H+ transporting V1 subunit A [Source:HGNC Symbol;Acc:HGNC:851]	3718.55	3923.14	4107.12	3831.91	3808.89	3713.31	3957.69	4195.36	4250.29	4782.82	5182.5	5119.28	52	54.11	54.69	63.08	67.34	65.9	4581.32	0.282085	0.0643698	4.38226	1.17454e-05	0.000595615
ENSG00000175197.11	DDIT3	protein_coding	DNA damage inducible transcript 3 [Source:HGNC Symbol;Acc:HGNC:2726]	749.063	733.838	743.755	747.916	741.456	742.193	296.16	326.947	304.543	429.064	489.502	444.005	20.17	21.82	20.31	29.35	32.98	29.62	381.702	0.554032	0.126524	4.37888	1.19289e-05	0.000602594
ENSG00000151718.15	WWC2	protein_coding	WW and C2 domain containing 2 [Source:HGNC Symbol;Acc:HGNC:24148]	5324.31	5153.01	5794.57	5942.5	5191.68	5949.53	801.438	795.433	753.098	542.701	615.535	575.113	7.3	7.12	6.72	4.96	5.54	5.13	680.573	-0.441768	0.100915	-4.37761	1.19988e-05	0.000603799
ENSG00000164109.13	MAD2L1	protein_coding	mitotic arrest deficient 2 like 1 [Source:HGNC Symbol;Acc:HGNC:6763]	1428.89	1494.22	1503.37	1536.72	1463.65	1483.25	1840.62	1993.7	2024.92	1497.75	1640.66	1468.31	62.7	66.63	67.54	51.21	55.24	48.98	1744.34	-0.349324	0.0799366	-4.37001	1.24242e-05	0.000622821
ENSG00000139352.3	ASCL1	protein_coding	achaete-scute family bHLH transcription factor 1 [Source:HGNC Symbol;Acc:HGNC:738]	2293.54	2286.37	2289.72	2290.74	2290.2	2289.97	78.5951	138.452	104.11	179.366	317.558	192.77	1.74	3	2.25	3.98	6.93	4.17	168.474	1.10211	0.252333	4.3677	1.25564e-05	0.000624682
ENSG00000197622.12	CDC42SE1	protein_coding	CDC42 small effector 1 [Source:HGNC Symbol;Acc:HGNC:17719]	2259.15	2276.96	2286.38	2222.43	2186.12	2209.78	5444.9	5613.93	5457.25	6343.96	6604.05	6676.1	122.93	124.4	120.63	143.76	147.42	147.65	6023.36	0.248988	0.0570032	4.36796	1.25412e-05	0.000624682
ENSG00000181381.13	DDX60L	protein_coding	DEAD-box helicase 60 like [Source:HGNC Symbol;Acc:HGNC:26429]	3175.42	3554.15	2498.01	3480.81	3175.91	3182.1	1196.68	1285.55	1544.63	1884.08	2075.27	1639.78	19.16	20.2	24.22	30.29	32.87	25.73	1604.38	0.474822	0.109032	4.3549	1.33129e-05	0.000659816
ENSG00000185885.15	IFITM1	protein_coding	interferon induced transmembrane protein 1 [Source:HGNC Symbol;Acc:HGNC:5412]	676.45	669.296	672.73	673.71	673.2	672.931	6909.98	5866.57	5460.88	8296.63	7948.33	7352.31	519.18	432.57	401.72	625.67	590.46	541.11	6972.43	0.371379	0.085382	4.34962	1.36375e-05	0.000673364
ENSG00000160213.6	CSTB	protein_coding	cystatin B [Source:HGNC Symbol;Acc:HGNC:2482]	1997.26	1989.47	1992.2	1994.2	1992.73	1992.98	4598.4	4378.06	4539.28	5290.53	5297.57	5762.85	116.67	109.01	112.77	134.73	132.9	143.22	4977.76	0.275064	0.0633729	4.34041	1.42217e-05	0.000699579
ENSG00000044090.8	CUL7	protein_coding	cullin 7 [Source:HGNC Symbol;Acc:HGNC:21024]	5084.82	5054.72	5034.68	5042.78	5118.39	5125.46	1908.68	1678.45	1817.67	1474.19	1279.96	1422.23	19.01	16.41	17.73	14.74	12.61	13.88	1596.88	-0.371424	0.0857606	-4.33095	1.4847e-05	0.000727614
ENSG00000136930.12	PSMB7	protein_coding	proteasome subunit beta 7 [Source:HGNC Symbol;Acc:HGNC:9544]	793.8	781.223	786.072	791.693	786.882	784.493	4128.04	3843.61	4224.28	3307.96	3192.43	3457.72	265.12	242.27	265.66	213.26	202.73	217.54	3692.34	-0.292204	0.067547	-4.32594	1.51886e-05	0.000741588
ENSG00000160326.13	SLC2A6	protein_coding	solute carrier family 2 member 6 [Source:HGNC Symbol;Acc:HGNC:11011]	2335.83	2318.53	2283.27	2310.77	2253.33	2312.7	368.292	378.016	402.341	536.268	558.194	525.255	8.09	8.15	8.65	11.83	12.12	11.3	461.374	0.492705	0.114135	4.31687	1.58258e-05	0.000769836
ENSG00000107562.16	CXCL12	protein_coding	C-X-C motif chemokine ligand 12 [Source:HGNC Symbol;Acc:HGNC:10672]	2526.24	2421.36	2466.73	2509.98	2569.6	2577.16	2314.11	2176.22	2308.66	1939.11	1754.33	1721.51	46.58	43.01	45.53	39.2	34.93	33.96	2035.65	-0.329279	0.0764461	-4.30734	1.65228e-05	0.000800777
ENSG00000169871.12	TRIM56	protein_coding	tripartite motif containing 56 [Source:HGNC Symbol;Acc:HGNC:19028]	9726.93	9231.11	9476.02	9708.33	9296.21	9455.07	5721.28	6271.86	5588.11	7038.66	7322.69	6958.8	30.51	32.83	29.19	37.68	38.62	36.36	6483.56	0.278353	0.0646507	4.30549	1.66617e-05	0.000804539
ENSG00000091127.13	PUS7	protein_coding	pseudouridylate synthase 7 (putative) [Source:HGNC Symbol;Acc:HGNC:26033]	2794.33	2653.98	2880.07	2683.44	2886.45	2799.09	1772.37	1987.77	1880.55	1554.59	1381	1482.86	32.22	35.46	33.48	28.37	24.83	26.4	1676.53	-0.350591	0.0814919	-4.30216	1.69143e-05	0.000813747
ENSG00000142089.15	IFITM3	protein_coding	interferon induced transmembrane protein 3 [Source:HGNC Symbol;Acc:HGNC:5414]	629.254	621.81	624.894	626.49	625.847	625.425	15036.4	12044.6	11818.3	17650.7	16229.3	16336.5	1215.37	955.51	935.38	1432.1	1297.11	1293.46	14852.6	0.368252	0.0857335	4.29531	1.74446e-05	0.000833155
ENSG00000185104.19	FAF1	protein_coding	Fas associated factor 1 [Source:HGNC Symbol;Acc:HGNC:3578]	1269.23	1280.58	1259.9	1182.49	1284.12	1227.8	1597.86	1552.97	1648.53	1358.48	1121.42	1206.74	64.62	61.64	65.27	55.18	44.85	47.83	1414.3	-0.379837	0.0884193	-4.29586	1.74021e-05	0.000833155
ENSG00000164054.15	SHISA5	protein_coding	shisa family member 5 [Source:HGNC Symbol;Acc:HGNC:30376]	1630.15	1599.37	1636.33	1620.53	1625.62	1644.53	6052.82	5385.09	5152.17	6628.64	7051.64	6841.89	188.24	164.36	156.89	206.92	216.83	208.42	6185.35	0.306554	0.0713902	4.29407	1.7543e-05	0.000834817
ENSG00000164307.12	ERAP1	protein_coding	endoplasmic reticulum aminopeptidase 1 [Source:HGNC Symbol;Acc:HGNC:18173]	3858.71	4443.38	4513.93	3782.11	4447.41	3607.46	1423.9	1388.85	1397.55	1886.65	1607.16	2053.21	17.59	16.84	16.91	23.4	19.64	24.86	1626.21	0.399208	0.0931753	4.28449	1.83162e-05	0.000868464
ENSG00000174827.13	PDZK1	protein_coding	PDZ domain containing 1 [Source:HGNC Symbol;Acc:HGNC:8821]	1570.32	1602.29	1584.23	1585.96	1547.4	1559.55	3654.87	3249.5	3528.08	2850.58	2577.44	2910.7	117.37	102.41	110.92	91.86	81.85	91.54	3128.53	-0.322374	0.0753467	-4.27853	1.88128e-05	0.000888805
ENSG00000184220.11	CMSS1	protein_coding	cms1 ribosomal small subunit homolog (yeast) [Source:HGNC Symbol;Acc:HGNC:28666]	897.972	911.108	927.808	872.533	871.331	930.627	1089.16	1129.01	1205.78	912.522	888.332	815.818	61.08	62.15	66.24	51.39	49.27	44.8	1006.79	-0.391091	0.0914659	-4.27581	1.90445e-05	0.000896527
ENSG00000152894.14	PTPRK	protein_coding	protein tyrosine phosphatase, receptor type K [Source:HGNC Symbol;Acc:HGNC:9674]	5143.71	5492.17	5436.73	5190.54	4887.01	5353.08	3668.26	4147.47	4074.64	2971.13	3371.78	3184.46	35.35	39.23	38.46	28.75	32.13	30.07	3569.64	-0.320384	0.0752871	-4.2555	2.08582e-05	0.000978397
ENSG00000008394.12	MGST1	protein_coding	microsomal glutathione S-transferase 1 [Source:HGNC Symbol;Acc:HGNC:7061]	700.111	691.987	703.784	697.365	709.065	705.41	4487.72	4969.4	5237.89	6079.21	5914.28	6024.89	323.61	351.68	369.84	440.02	421.69	425.58	5452.21	0.294106	0.0691877	4.25084	2.1297e-05	0.000992632
ENSG00000072310.16	SREBF1	protein_coding	sterol regulatory element binding transcription factor 1 [Source:HGNC Symbol;Acc:HGNC:11289]	2037.97	1989.57	2206.73	2096.01	2071.57	1959.74	5944.47	4994.38	4286.79	6582.64	6675.86	6895.19	146	120.4	103.11	162.31	162.12	165.91	5896.53	0.404841	0.0952731	4.24927	2.14466e-05	0.000992632
ENSG00000099204.18	ABLIM1	protein_coding	actin binding LIM protein 1 [Source:HGNC Symbol;Acc:HGNC:78]	5327.69	5934.95	4884.46	4265.38	5065.79	4524.34	455.06	448.917	546.559	348.116	246.954	334.771	4.63	4.48	5.44	3.55	2.49	3.33	396.707	-0.638805	0.150378	-4.24798	2.15706e-05	0.000992632
ENSG00000128284.19	APOL3	protein_coding	apolipoprotein L3 [Source:HGNC Symbol;Acc:HGNC:14868]	1878.1	1288.23	2069.47	1548.9	1731.68	1726.38	30.9121	71.2875	31.0087	128.84	112.849	95.0712	0.93	2.1	0.91	3.88	3.34	2.79	78.3459	1.3915	0.327603	4.24752	2.16151e-05	0.000992632
ENSG00000137801.10	THBS1	protein_coding	thrombospondin 1 [Source:HGNC Symbol;Acc:HGNC:11785]	6025.05	6196.02	6299.29	6280.27	6064.29	5950.41	19574.3	19841.6	17284.4	15115.8	16153.7	15366.5	161.36	160.53	139.51	125.07	131.67	124.08	17222.9	-0.282037	0.0663827	-4.24866	2.15056e-05	0.000992632
ENSG00000170242.17	USP47	protein_coding	ubiquitin specific peptidase 47 [Source:HGNC Symbol;Acc:HGNC:20076]	3997.12	4129.64	4102.69	3874.88	3917.16	3700.13	1554.28	1704	1695.36	2012.31	2084.72	2063.47	19.9	21.4	21.26	25.85	26.39	25.88	1852.35	0.314526	0.0740107	4.24974	2.14016e-05	0.000992632
ENSG00000109805.9	NCAPG	protein_coding	non-SMC condensin I complex subunit G [Source:HGNC Symbol;Acc:HGNC:24304]	3353.07	2773.9	3203.47	3044.15	3405.38	3273.75	1058.31	1253.92	1124.23	949.283	771.175	784.899	16.89	19.65	17.57	15.21	12.16	12.27	990.297	-0.454224	0.107077	-4.24203	2.21504e-05	0.00101343
ENSG00000205084.10	TMEM231	protein_coding	transmembrane protein 231 [Source:HGNC Symbol;Acc:HGNC:37234]	2779.61	2754.98	2622.54	2793.35	2928.01	2640.62	286.573	306.635	287.743	177.775	184.608	200.839	5.27	5.54	5.18	3.27	3.35	3.62	240.727	-0.643124	0.151633	-4.24131	2.22223e-05	0.00101343
ENSG00000071859.14	FAM50A	protein_coding	family with sequence similarity 50 member A [Source:HGNC Symbol;Acc:HGNC:18786]	1105.82	1093.78	1111.4	1093.63	1120.74	1121.36	2856.7	2839.97	2524.57	3341.89	3418.18	3363.76	130.4	127.24	112.84	153.13	154.29	150.42	3057.52	0.300867	0.0710653	4.23367	2.29909e-05	0.00104485
ENSG00000075461.5	CACNG4	protein_coding	calcium voltage-gated channel auxiliary subunit gamma 4 [Source:HGNC Symbol;Acc:HGNC:1408]	3201.54	3194.37	3197.72	3198.74	3198.2	3197.97	5598	5453.84	5976.96	4573.68	4692.12	4870.64	88.51	84.63	92.54	72.59	73.36	75.44	5194.21	-0.26869	0.0635041	-4.23107	2.32585e-05	0.00105337
ENSG00000168621.14	GDNF	protein_coding	glial cell derived neurotrophic factor [Source:HGNC Symbol;Acc:HGNC:4232]	3631.54	3452.37	3627.72	3628.74	3473.2	3231.59	23.5737	21.8521	23.9421	63.2916	62.4574	64.66	0.34	0.31	0.34	0.92	0.89	0.91	43.2975	1.4541	0.3441	4.22579	2.38103e-05	0.00107466
ENSG00000122679.8	RAMP3	protein_coding	receptor activity modifying protein 3 [Source:HGNC Symbol;Acc:HGNC:9845]	1106.07	1104.22	1107.94	1074.72	1118.6	1030.66	894.246	885.743	723.321	626.508	618.881	536.4	41.49	40.33	32.86	29.18	28.39	24.38	714.192	-0.491681	0.116617	-4.2162	2.48452e-05	0.00111371
ENSG00000130309.10	COLGALT1	protein_coding	collagen beta(1-O)galactosyltransferase 1 [Source:HGNC Symbol;Acc:HGNC:26182]	3257.55	3294.86	3284.17	3356.92	3337	3386.61	1583.79	1425.59	1554.68	1158.96	1147.08	1260.83	24.12	21.32	23.2	17.73	17.28	18.81	1355.16	-0.354881	0.0841689	-4.21629	2.48349e-05	0.00111371
ENSG00000101986.11	ABCD1	protein_coding	ATP binding cassette subfamily D member 1 [Source:HGNC Symbol;Acc:HGNC:61]	3234.98	3207.05	3372.48	3320.29	3299.7	3329.83	1211.3	997.181	870.542	1374.77	1481.49	1400.06	18.6	15.03	13.09	21.19	22.49	21.06	1222.55	0.467015	0.111109	4.20319	2.63174e-05	0.00116774
ENSG00000114554.11	PLXNA1	protein_coding	plexin A1 [Source:HGNC Symbol;Acc:HGNC:9099]	8727.42	7447.42	7953.19	8433.69	8785.06	8721.22	3336.65	3218.77	3064.7	2660.2	2329.79	2695.28	20.26	19.17	18.22	16.21	13.99	16.03	2884.22	-0.322378	0.0766844	-4.20396	2.62288e-05	0.00116774
ENSG00000129636.12	ITFG1	protein_coding	integrin alpha FG-GAP repeat containing 1 [Source:HGNC Symbol;Acc:HGNC:30697]	2157.89	2130.72	2046.98	2050.52	1965.69	2170.77	1278.57	1507.31	1579.24	1060.07	1192.29	977.097	31	35.86	37.48	25.8	28.58	23.21	1265.73	-0.437955	0.104175	-4.20405	2.62179e-05	0.00116774
ENSG00000173638.18	SLC19A1	protein_coding	solute carrier family 19 member 1 [Source:HGNC Symbol;Acc:HGNC:10937]	2295.68	2307.07	2521.44	2433.71	2589.63	2376.33	1947.12	1745.8	1560.9	1279.98	1114.61	1440.46	40.71	35.82	31.96	26.87	23.04	29.51	1514.8	-0.450916	0.107302	-4.20231	2.64211e-05	0.0011684
ENSG00000100906.10	NFKBIA	protein_coding	NFKB inhibitor alpha [Source:HGNC Symbol;Acc:HGNC:7797]	1250.87	1256.68	1278.28	1250.09	1258.81	1255.02	4418.51	4534.33	4100.93	5215.47	5396.39	5126.22	177.57	178.84	161.37	210.4	214.44	201.81	4798.64	0.269874	0.0642487	4.20046	2.66374e-05	0.00117401
ENSG00000198064.13	NPIPB13	protein_coding	nuclear pore complex interacting protein family, member B13 [Source:HGNC Symbol;Acc:HGNC:41989]	1370.63	751.245	2517.66	670.346	611.387	686.14	18.7868	35.7695	6.22596	69.9405	114.842	53.0776	1.01	1.82	0.32	3.76	6.03	2.77	49.7147	2.06702	0.492746	4.19489	2.73004e-05	0.00119921
ENSG00000124429.17	POF1B	protein_coding	premature ovarian failure, 1B [Source:HGNC Symbol;Acc:HGNC:13711]	3762.54	3755.37	3758.72	3759.74	3759.2	3758.97	535.123	621.503	708.894	852.891	854.463	887.051	7.2	8.21	9.34	11.52	11.37	11.69	743.315	0.475416	0.113459	4.19018	2.78731e-05	0.00122028
ENSG00000178467.17	P4HTM	protein_coding	prolyl 4-hydroxylase, transmembrane [Source:HGNC Symbol;Acc:HGNC:28858]	1972.18	2056.38	2047.56	2067.89	2062.8	2005.18	1599.23	1388.1	1320.3	1805.85	1854.57	1883.35	39.75	33.86	32.13	45.03	45.56	45.85	1641.86	0.363848	0.0869953	4.18239	2.88465e-05	0.0012587
ENSG00000011258.15	MBTD1	protein_coding	mbt domain containing 1 [Source:HGNC Symbol;Acc:HGNC:19866]	4439.5	4660.36	4723.96	4737.45	4818.48	4623.84	2226.91	2401.34	2224.29	1889.75	1851.55	1836.27	24.13	25.54	23.61	20.56	19.85	19.49	2071.67	-0.296233	0.0709324	-4.17627	2.9633e-05	0.00128874
ENSG00000010017.12	RANBP9	protein_coding	RAN binding protein 9 [Source:HGNC Symbol;Acc:HGNC:13727]	2887.64	2874.6	2838.63	2831.81	2837.45	2809.56	2416.06	2694.87	2697.35	3085.35	3339.75	3207.45	42.92	47	46.92	55.02	58.66	55.81	2906.79	0.302643	0.0725054	4.17407	2.99207e-05	0.00129696
ENSG00000164830.18	OXR1	protein_coding	oxidation resistance 1 [Source:HGNC Symbol;Acc:HGNC:15822]	3530.88	3354.71	3306.15	3349.49	3283.14	3257.52	2462.27	2909.77	2979.67	2191.43	2277.8	2040.25	37.22	43.16	44.09	33.25	34.04	30.21	2476.84	-0.360269	0.0863801	-4.17074	3.03608e-05	0.00131171
ENSG00000164920.9	OSR2	protein_coding	odd-skipped related transciption factor 2 [Source:HGNC Symbol;Acc:HGNC:15830]	1512.49	1576.07	1559.81	1541.67	1479.76	1562.37	1265.29	1161.18	1127.63	1461.18	1597.56	1479.76	41.59	37.46	36.29	48.21	51.92	47.64	1348.76	0.351234	0.084284	4.16726	3.08282e-05	0.00132753
ENSG00000104856.13	RELB	protein_coding	RELB proto-oncogene, NF-kB subunit [Source:HGNC Symbol;Acc:HGNC:9956]	1945.3	1714.6	1461.3	1819.85	1710.8	1744.24	223.208	250.966	245.944	362.814	347.611	357.308	6.54	7.21	7.06	10.67	10.07	10.25	297.968	0.571529	0.137384	4.1601	3.18113e-05	0.00136448
ENSG00000144290.16	SLC4A10	protein_coding	solute carrier family 4 member 10 [Source:HGNC Symbol;Acc:HGNC:13811]	4480.94	4362.51	4665.64	4406.83	4265.4	4309.93	213.862	245.286	204.741	363.665	374.53	297.747	2.45	2.76	2.3	4.18	4.24	3.34	283.339	0.642597	0.154489	4.1595	3.18941e-05	0.00136448
ENSG00000196576.14	PLXNB2	protein_coding	plexin B2 [Source:HGNC Symbol;Acc:HGNC:9104]	3900.02	4172.28	4079.65	4009.15	3880.9	4090.96	4937.16	4466.84	4365.84	5222.53	5939.12	5917.23	62.09	55.15	53.76	65.93	73.85	72.89	5141.4	0.310448	0.07491	4.14428	3.40876e-05	0.00144422
ENSG00000203879.11	GDI1	protein_coding	GDP dissociation inhibitor 1 [Source:HGNC Symbol;Acc:HGNC:4226]	2045.58	2023.36	2068.17	2071.44	2038.74	2072.29	7697.19	7053.44	6561.18	8508.43	8869.64	8575.59	189.57	170.5	158.23	210.35	216	206.88	7877.55	0.284094	0.0685431	4.14475	3.40179e-05	0.00144422
ENSG00000216490.3	IFI30	protein_coding	IFI30, lysosomal thiol reductase [Source:HGNC Symbol;Acc:HGNC:5398]	958.928	956.482	959.185	959.684	959.383	961.092	3782.65	3322.07	3312.6	4435.58	4091.02	4335.56	199.42	171.89	170.99	234.76	213.28	223.91	3879.9	0.304266	0.0734126	4.1446	3.404e-05	0.00144422
ENSG00000005801.16	ZNF195	protein_coding	zinc finger protein 195 [Source:HGNC Symbol;Acc:HGNC:12986]	1436.84	1606.96	1660.49	1757.85	1705.07	1554.92	566.079	571.143	503.583	356.742	424.928	374.554	17.72	17.53	15.42	11.19	13.14	11.47	466.194	-0.507353	0.122449	-4.1434	3.422e-05	0.00144516
ENSG00000152137.6	HSPB8	protein_coding	heat shock protein family B (small) member 8 [Source:HGNC Symbol;Acc:HGNC:30171]	1946.96	1940.76	1944.95	1919.21	1937.62	1934.26	7965.44	7764.11	7691.4	9002.15	9003.48	9428.04	207.91	198.9	196.58	235.87	232.38	241.06	8475.75	0.228385	0.0551674	4.13987	3.47508e-05	0.00146287
ENSG00000111145.7	ELK3	protein_coding	ELK3, ETS transcription factor [Source:HGNC Symbol;Acc:HGNC:3325]	3527.84	3913.73	3745.1	3882.2	3882.44	3871.9	516.704	531.538	446.113	388.188	320.169	279.064	6.87	6.93	5.8	5.18	4.21	3.64	413.614	-0.599071	0.144813	-4.13686	3.52086e-05	0.00147741
ENSG00000069275.12	NUCKS1	protein_coding	nuclear casein kinase and cyclin dependent kinase substrate 1 [Source:HGNC Symbol;Acc:HGNC:29923]	3617.18	3383.09	3226.38	3173.87	3203.61	3299.51	30848.6	33809.5	38438	29460.1	26186.3	26189.8	470.72	506.32	574.31	451.22	395.09	391.46	30822.1	-0.333284	0.0806669	-4.13161	3.60225e-05	0.00150675
ENSG00000042286.14	AIFM2	protein_coding	apoptosis inducing factor, mitochondria associated 2 [Source:HGNC Symbol;Acc:HGNC:21411]	2780.69	2828.06	2898.22	2869.84	2843.09	2770.34	1110.09	956.233	1015.3	1316.45	1250.3	1503.41	19.83	16.76	17.75	23.6	22.08	26.3	1191.96	0.402871	0.0976898	4.12398	3.72377e-05	0.00155263
ENSG00000151014.5	NOCT	protein_coding	nocturnin [Source:HGNC Symbol;Acc:HGNC:14254]	1762.04	1636.37	1625.8	1694.23	1315.6	1507.87	186.174	217.064	229.298	272.092	432.406	353.354	5.95	6.8	7.17	8.72	13.65	11.05	281.724	0.734124	0.178058	4.12296	3.74042e-05	0.00155464
ENSG00000172037.13	LAMB2	protein_coding	laminin subunit beta 2 [Source:HGNC Symbol;Acc:HGNC:6487]	1850.88	1898.73	2094.64	1880.03	1890.95	1916.24	6523.02	5439.54	4638.23	7117.63	7484.61	7303.65	171.76	140.57	119.58	188.13	194.88	188.39	6417.78	0.400274	0.0972172	4.11732	3.83303e-05	0.00158811
ENSG00000147255.18	IGSF1	protein_coding	immunoglobulin superfamily member 1 [Source:HGNC Symbol;Acc:HGNC:5948]	3214.71	3229.51	3219.83	3238.2	3229.6	3287.22	4960.57	4767.68	4139.51	6679.9	6584.69	5123.3	77.5	73.11	63.33	104.76	101.72	78.42	5375.94	0.406425	0.0987352	4.11631	3.84984e-05	0.00159006
ENSG00000123609.10	NMI	protein_coding	N-myc and STAT interactor [Source:HGNC Symbol;Acc:HGNC:7854]	1402.03	1393.18	1393.44	1368.63	1376.09	1373.74	513.714	622.633	609.045	832.478	874.581	723.555	18.77	22.32	21.78	30.52	31.58	25.89	695.994	0.475607	0.115568	4.1154	3.86509e-05	0.00159135
ENSG00000003249.13	DBNDD1	protein_coding	dysbindin domain containing 1 [Source:HGNC Symbol;Acc:HGNC:28455]	1960.13	1939.26	1931.81	1976.19	1977.2	1974.27	3410.21	3177.29	2926.56	2405.68	2620.83	2606.6	88	80.46	73.94	62.31	66.87	65.89	2857.87	-0.317687	0.0772385	-4.11307	3.90436e-05	0.0016003
ENSG00000112096.16	SOD2	protein_coding	superoxide dismutase 2 [Source:HGNC Symbol;Acc:HGNC:11180]	1500.19	1733	1651.56	1505.93	1699.78	1500.6	3617.89	3667.47	3762.91	4319.57	4280.49	4590.39	114.67	114.1	116.74	137.38	134.15	142.53	4039.78	0.256053	0.0622596	4.11266	3.91121e-05	0.0016003
ENSG00000231074.8	HCG18	antisense_RNA	HLA complex group 18 (non-protein coding) [Source:HGNC Symbol;Acc:HGNC:31337]	2190.1	2143.03	2241.81	2274.35	2246.51	2221.05	901.134	897.503	878.266	675.065	712.456	676.503	20.53	20.08	19.6	15.44	16.04	15.11	790.153	-0.376337	0.0915658	-4.11002	3.95625e-05	0.00161371
ENSG00000197249.13	SERPINA1	protein_coding	serpin family A member 1 [Source:HGNC Symbol;Acc:HGNC:8941]	1326.99	1430.88	1361.9	1344.15	1373.1	1340.19	605.664	713.104	582.664	406.192	499.373	425.137	22.48	25.98	21.17	15.13	18.32	15.46	538.695	-0.516887	0.125809	-4.10849	3.98247e-05	0.00161938
ENSG00000060491.16	OGFR	protein_coding	opioid growth factor receptor [Source:HGNC Symbol;Acc:HGNC:15768]	2222.75	2215.53	2247.78	2258.78	2236.9	2248.68	4458.95	4115.11	3832.82	4950.58	5357.82	4953.77	100.73	91.24	84.79	112.26	119.68	109.62	4611.49	0.298318	0.0727466	4.10078	4.11751e-05	0.00166912
ENSG00000128891.15	CCDC32	protein_coding	coiled-coil domain containing 32 [Source:HGNC Symbol;Acc:HGNC:28295]	1020.76	1091.76	1149.36	940.708	972.228	930.3	448.675	494.799	462.286	602.452	640.257	668.879	22.38	24.22	22.57	30.16	31.55	32.65	552.865	0.444964	0.108695	4.0937	4.24547e-05	0.00171569
ENSG00000117448.13	AKR1A1	protein_coding	aldo-keto reductase family 1 member A1 [Source:HGNC Symbol;Acc:HGNC:380]	991.846	943.687	966.891	963.359	1014.75	965.727	1529.24	1567.18	1484.83	1844.62	1882.1	1887.49	79.38	79.85	75.48	96.12	96.61	95.98	1699.24	0.294077	0.0718538	4.09271	4.26361e-05	0.00171774
ENSG00000138814.16	PPP3CA	protein_coding	protein phosphatase 3 catalytic subunit alpha [Source:HGNC Symbol;Acc:HGNC:9314]	3916.59	4133.58	4148.39	3925.15	3957.64	3963.65	2209.15	2332.45	2558.71	2819.32	3047.28	2948.15	27.89	28.89	31.62	35.71	38.03	36.45	2652.47	0.310782	0.0760819	4.08484	4.4107e-05	0.00177156
ENSG00000172725.13	CORO1B	protein_coding	coronin 1B [Source:HGNC Symbol;Acc:HGNC:2253]	1404.17	1443.59	1382.81	1422.18	1357.42	1464.46	3923.9	3296.9	3799.4	4255.94	4831.9	4790.43	140.53	115.87	133.22	153	171.11	168.06	4149.72	0.331895	0.0813199	4.08135	4.47756e-05	0.00179294
ENSG00000138642.14	HERC6	protein_coding	HECT and RLD domain containing E3 ubiquitin protein ligase family member 6 [Source:HGNC Symbol;Acc:HGNC:26072]	3332.44	3199.92	3331.75	3335.36	3265.23	3260.05	2341.75	2524.42	2517.71	2912.77	3016.81	2990.31	36.03	38.1	37.92	44.98	45.89	45.07	2717.29	0.272891	0.0669467	4.07624	4.57703e-05	0.0018272
ENSG00000120708.16	TGFBI	protein_coding	transforming growth factor beta induced [Source:HGNC Symbol;Acc:HGNC:11771]	1911.71	1813.49	1678.77	1704.25	2170.78	2125.5	341.923	393.476	523.062	208.645	225.099	308.153	9.15	10.33	13.7	5.61	5.95	8.07	333.382	-0.754681	0.185496	-4.06846	4.73255e-05	0.00187794
ENSG00000144815.15	NXPE3	protein_coding	neurexophilin and PC-esterase domain family member 3 [Source:HGNC Symbol;Acc:HGNC:28238]	2976.88	3610.67	3463.33	3663.84	3714.31	3535.42	640.777	627.682	641.74	790.926	844.623	864.671	9.3	8.94	9.11	11.52	12.11	12.29	735.069	0.38858	0.0955106	4.06845	4.73275e-05	0.00187794
ENSG00000170525.19	PFKFB3	protein_coding	6-phosphofructo-2-kinase/fructose-2,6-biphosphatase 3 [Source:HGNC Symbol;Acc:HGNC:8874]	3661.06	3648.74	3603.26	3688.89	3703.97	3549.52	2256.53	2655.53	2558.63	1808.59	1945.11	2100.29	31.33	36.18	34.78	25.21	26.7	28.57	2220.78	-0.350495	0.0862	-4.06607	4.78128e-05	0.00189148
ENSG00000124215.16	CDH26	protein_coding	cadherin 26 [Source:HGNC Symbol;Acc:HGNC:15902]	1921.49	1884.73	1872.27	1952.07	1924.32	1868.78	445.499	625.991	586.322	318.511	382.062	392.724	11.84	16.32	15.25	8.49	10.04	10.22	458.519	-0.59859	0.147277	-4.06438	4.8161e-05	0.00189954
ENSG00000120875.8	DUSP4	protein_coding	dual specificity phosphatase 4 [Source:HGNC Symbol;Acc:HGNC:3070]	5315.43	5351.37	5327.77	5309.15	5355.2	5294.17	315.449	317.962	308.841	174.581	204.741	228.407	3	2.96	2.87	1.67	1.92	2.12	258.316	-0.627788	0.154685	-4.0585	4.93897e-05	0.00194217
ENSG00000073969.18	NSF	protein_coding	N-ethylmaleimide sensitive factor, vesicle fusing ATPase [Source:HGNC Symbol;Acc:HGNC:8016]	3612.98	3627.95	3688.6	3769.96	3709.38	3668.73	3649.44	4016.98	4046.85	3031.22	3173.95	3364.93	50.16	54.18	54.47	41.82	43.14	45.31	3547.23	-0.290845	0.0717729	-4.0523	5.07164e-05	0.00198828
ENSG00000153774.8	CFDP1	protein_coding	craniofacial development protein 1 [Source:HGNC Symbol;Acc:HGNC:1873]	1050.49	1056.18	1039.95	1036.83	1054.66	1047.44	2483.86	2482.41	2628.89	2138.4	2059.7	2078.95	119.89	117.6	124.25	103.6	98.31	98.3	2312.04	-0.275367	0.0679647	-4.05162	5.0865e-05	0.00198828
ENSG00000138190.16	EXOC6	protein_coding	exocyst complex component 6 [Source:HGNC Symbol;Acc:HGNC:23196]	2287.85	3316.83	2949.67	2008.81	2032.13	1987.55	771.683	600.726	771.14	937.99	977.001	1019	16.4	12.53	16.04	20.01	20.53	21.21	846.251	0.453472	0.111993	4.0491	5.14141e-05	0.00200378
ENSG00000090339.8	ICAM1	protein_coding	intercellular adhesion molecule 1 [Source:HGNC Symbol;Acc:HGNC:5344]	2860.26	3013.06	2823.32	2822.17	2941.28	3047.23	572.906	620.737	589.705	749.438	885.993	766.112	9.93	10.56	10.01	13.04	15.18	13.01	697.482	0.427082	0.105504	4.04802	5.1652e-05	0.00200709
ENSG00000024526.16	DEPDC1	protein_coding	DEP domain containing 1 [Source:HGNC Symbol;Acc:HGNC:22949]	3472.37	4343.73	3751.14	4109.76	4542.19	3959.4	1250.82	1074.18	1329.52	994.72	806.227	902.532	15.77	13.28	16.39	12.57	10.04	11.14	1059.65	-0.434667	0.107577	-4.04052	5.33338e-05	0.00206587
ENSG00000123106.10	CCDC91	protein_coding	coiled-coil domain containing 91 [Source:HGNC Symbol;Acc:HGNC:24855]	1627.9	1770.11	1428.04	1739.92	1927.95	1425.76	455.697	486.954	614.069	348.005	295.889	384.995	14.04	14.71	18.51	10.74	9.02	11.6	430.759	-0.596814	0.147747	-4.03944	5.3578e-05	0.00206587
ENSG00000146555.18	SDK1	protein_coding	sidekick cell adhesion molecule 1 [Source:HGNC Symbol;Acc:HGNC:19307]	8066.53	7654.14	8073.49	6835.94	6866.14	8869.31	1206.49	936.23	981.031	627.612	428.265	337.993	7.94	6.05	6.31	4.14	2.78	2.17	753.065	-1.16694	0.288905	-4.03919	5.36366e-05	0.00206587
ENSG00000103489.11	XYLT1	protein_coding	xylosyltransferase 1 [Source:HGNC Symbol;Acc:HGNC:15516]	9141.69	9705.37	9252.32	9709.74	9709.2	8690.57	204.731	184.67	224.823	109.783	105.08	138.996	1.11	0.98	1.19	0.6	0.56	0.74	161.347	-0.788454	0.195405	-4.03498	5.46074e-05	0.00209711
ENSG00000114999.7	TTL	protein_coding	tubulin tyrosine ligase [Source:HGNC Symbol;Acc:HGNC:21586]	3526.58	3774.43	3430.82	3811.66	3858.09	3927.43	1475.25	1379.11	1615.59	1214.28	1140.89	1152.59	20.07	18.4	21.52	16.57	15.34	15.37	1329.62	-0.350491	0.0869696	-4.03003	5.57687e-05	0.00213547
ENSG00000064042.17	LIMCH1	protein_coding	LIM and calponin homology domains 1 [Source:HGNC Symbol;Acc:HGNC:29191]	2886.18	3531.59	2998.24	3405.08	3244.02	3657.69	755.699	634.691	816.764	572.524	495.912	508.33	11.67	9.61	12.35	8.87	7.58	7.69	630.644	-0.485491	0.120521	-4.02828	5.61856e-05	0.00214518
ENSG00000133466.13	C1QTNF6	protein_coding	C1q and TNF related 6 [Source:HGNC Symbol;Acc:HGNC:14343]	2748.08	2779.77	2707.04	2714.33	2706.48	2690.42	1654.76	1928.68	1578.77	2040.06	2312.06	2297.49	30.72	35.13	28.7	38.01	42.43	41.77	1968.63	0.366462	0.0911176	4.02186	5.77399e-05	0.00219813
ENSG00000137575.11	SDCBP	protein_coding	syndecan binding protein [Source:HGNC Symbol;Acc:HGNC:10662]	1835.69	1905.5	1909.85	1880.27	1905.46	1853.03	1785.96	2033.78	2020.76	2304.83	2452.72	2500.31	48	53.66	53.18	62.18	65.18	65.84	2183.05	0.313708	0.0783002	4.00647	6.16318e-05	0.00233277
ENSG00000151025.9	GPR158	protein_coding	G protein-coupled receptor 158 [Source:HGNC Symbol;Acc:HGNC:23689]	3964.46	4595.1	4257.01	4143.43	4035.66	4278.94	313.037	300.862	295.589	429.85	448.952	410.414	3.76	3.55	3.48	5.19	5.34	4.83	366.447	0.500865	0.125013	4.00651	6.16233e-05	0.00233277
ENSG00000130558.19	OLFM1	protein_coding	olfactomedin 1 [Source:HGNC Symbol;Acc:HGNC:17187]	1706.53	1426.34	1406.85	1550.7	1508.79	1547.29	1759.91	2076.12	1966.27	1521.97	1587.48	1495.31	58.5	67.73	64	50.78	52.18	48.69	1734.52	-0.33308	0.0832063	-4.00306	6.25284e-05	0.00235991
ENSG00000112297.14	CRYBG1	protein_coding	crystallin beta-gamma domain containing 1 [Source:HGNC Symbol;Acc:HGNC:356]	8849.47	8742.34	8415.62	8702.08	8808.45	8791.8	1667.47	1771.43	2084.56	2309.55	2257.22	2627.93	9.67	10.09	11.84	13.45	12.95	14.93	2119.66	0.381815	0.0954159	4.00158	6.29205e-05	0.0023679
ENSG00000127948.15	POR	protein_coding	cytochrome p450 oxidoreductase [Source:HGNC Symbol;Acc:HGNC:9208]	1654.22	1612.94	1542.29	1574.71	1633.38	1726.67	3441.47	3069.04	3290.51	4067.06	3977.82	3811.77	107.24	93.84	100.4	127.2	122.56	116.33	3609.6	0.273337	0.0684437	3.9936	6.50785e-05	0.00244212
ENSG00000188176.11	SMTNL2	protein_coding	smoothelin like 2 [Source:HGNC Symbol;Acc:HGNC:24764]	1245.92	1341.95	1244.31	1606.7	1558.55	1370.67	219.678	189.802	204.535	124.339	101.84	135.615	8	6.78	7.3	4.55	3.67	4.84	162.641	-0.75668	0.189584	-3.99126	6.57224e-05	0.00245925
ENSG00000092010.14	PSME1	protein_coding	proteasome activator subunit 1 [Source:HGNC Symbol;Acc:HGNC:9568]	807.499	796.779	800.737	805.309	804.952	805.717	10688.8	11619.7	11080.1	13680	13577.1	12439.4	672.69	717.71	682.79	864.2	844.9	766.87	12180.8	0.249438	0.0625128	3.99019	6.60215e-05	0.00246343
ENSG00000108468.14	CBX1	protein_coding	chromobox 1 [Source:HGNC Symbol;Acc:HGNC:1551]	1775.12	1781.86	1778.33	1805.86	1803.99	1803.04	7973.31	8472.06	8513.92	7159.42	7236.86	6765.21	225.08	234.72	235.34	202.86	202.01	187.07	7686.82	-0.238626	0.0598632	-3.98619	6.7143e-05	0.00249818
ENSG00000152767.16	FARP1	protein_coding	FERM, ARH/RhoGEF and pleckstrin domain protein 1 [Source:HGNC Symbol;Acc:HGNC:3591]	3820.64	4593.38	4233.81	4572.44	4580.8	3396.3	1014.05	806.08	948.771	606.045	491.645	770.861	12.29	9.59	11.26	7.38	5.88	9.12	773.006	-0.568558	0.142795	-3.98163	6.84444e-05	0.00253225
ENSG00000155099.7	TMEM55A	protein_coding	transmembrane protein 55A [Source:HGNC Symbol;Acc:HGNC:25452]	1362.39	1477.06	1249.34	819.166	1040.51	1203.49	254.303	248.821	272.575	516.047	375.586	336.185	10.99	10.55	11.52	22.38	16.03	14.23	333.932	0.654029	0.164261	3.98166	6.84366e-05	0.00253225
ENSG00000169241.17	SLC50A1	protein_coding	solute carrier family 50 member 1 [Source:HGNC Symbol;Acc:HGNC:30657]	1012.4	985.465	977.607	1021.47	1014.28	1015.63	2001.54	1980.32	1864.65	2447.52	2518.35	2240.55	100.78	97.87	91.93	123.7	125.37	110.51	2175.48	0.300449	0.0754768	3.98067	6.87201e-05	0.00253531
ENSG00000149428.18	HYOU1	protein_coding	hypoxia up-regulated 1 [Source:HGNC Symbol;Acc:HGNC:16931]	3203.5	3275.76	3270.82	3101.36	3335.71	3122.35	7241.57	7127.03	7140.11	8215.82	8185.33	8786.05	113.83	109.95	109.89	129.63	127.21	135.28	7782.62	0.228043	0.057374	3.97468	7.04748e-05	0.00259276
ENSG00000163873.9	GRIK3	protein_coding	glutamate ionotropic receptor kainate type subunit 3 [Source:HGNC Symbol;Acc:HGNC:4581]	5318.6	5913.84	5536.79	5285.01	5672.26	5329.71	207.885	189.834	210.267	100.713	116.226	138.351	1.91	1.71	1.89	0.93	1.06	1.25	160.5	-0.765552	0.19268	-3.97317	7.09209e-05	0.00260189
ENSG00000104774.12	MAN2B1	protein_coding	mannosidase alpha class 2B member 1 [Source:HGNC Symbol;Acc:HGNC:6826]	2447.08	2285.32	2705.06	2282.25	2505.54	2443.15	1507.84	1687.94	1311.11	1932.46	1890.14	1994.13	31.25	34.33	26.6	40.2	38.72	40.47	1720.57	0.371156	0.0935556	3.96723	7.27142e-05	0.00266025
ENSG00000072364.12	AFF4	protein_coding	AF4/FMR2 family member 4 [Source:HGNC Symbol;Acc:HGNC:17869]	6441.79	7364.74	6982.56	7368.48	7679.28	7399.88	5528.5	5364.95	5597.78	4723.78	4684.94	4705.28	38.84	37	38.53	33.33	32.55	32.4	5100.86	-0.224641	0.0568093	-3.9543	7.67605e-05	0.00278917
ENSG00000128050.8	PAICS	protein_coding	phosphoribosylaminoimidazole carboxylase and phosphoribosylaminoimidazolesuccinocarboxamide synthase [Source:HGNC Symbol;Acc:HGNC:8587]	2488.44	2512.13	2420.68	2499.34	2457.12	2415.1	10373.7	10901.5	11806.3	9345.24	9335.71	9169.21	212.79	219.47	237.13	192.43	189.35	184.24	10155.3	-0.248592	0.0628618	-3.95459	7.66669e-05	0.00278917
ENSG00000140403.12	DNAJA4	protein_coding	DnaJ heat shock protein family (Hsp40) member A4 [Source:HGNC Symbol;Acc:HGNC:14885]	2498.01	2558.88	2532.07	2575.24	2468.57	2581.22	1340.67	1345.98	1378.11	1659.54	1728.94	1612.54	26.75	26.35	26.91	33.22	34.1	31.51	1510.96	0.297298	0.0751903	3.95394	7.68752e-05	0.00278917
ENSG00000138867.16	GUCD1	protein_coding	guanylyl cyclase domain containing 1 [Source:HGNC Symbol;Acc:HGNC:14237]	2134.05	1916.35	2075	1921.3	1933.71	2062.85	2102.53	2186.3	2203.61	2530.91	2608.21	2660.75	53.01	54.11	54.41	64.06	65.02	65.72	2382.04	0.265115	0.0670622	3.95328	7.70879e-05	0.00278918
ENSG00000138778.11	CENPE	protein_coding	centromere protein E [Source:HGNC Symbol;Acc:HGNC:1856]	6475.53	7853.36	6635.1	7007.72	8161.34	7098.62	1391.38	1182.93	1354.35	1129.36	907.99	887.259	9.81	8.18	9.34	7.98	6.32	6.12	1142.26	-0.428132	0.108621	-3.94153	8.09621e-05	0.00292131
ENSG00000011426.10	ANLN	protein_coding	anillin actin binding protein [Source:HGNC Symbol;Acc:HGNC:14082]	4279.48	4147.21	4138.91	4318.62	4176.73	4320.16	4047.06	4367.72	4798.5	3672.1	3549.68	3586.36	48.39	51.24	56.17	44.06	41.97	42	4003.54	-0.289871	0.0736364	-3.93652	8.26714e-05	0.00295261
ENSG00000100911.15	PSME2	protein_coding	proteasome activator subunit 2 [Source:HGNC Symbol;Acc:HGNC:9569]	638.818	611.005	611.33	625.946	624.181	622.105	5998.94	6667.18	6579.02	7614.89	8039.71	7376.97	487.6	531.85	523.58	621.26	646.12	587.33	7046.1	0.258813	0.0657195	3.93814	8.21146e-05	0.00295261
ENSG00000112343.10	TRIM38	protein_coding	tripartite motif containing 38 [Source:HGNC Symbol;Acc:HGNC:10059]	9234.54	9227.37	9230.72	9231.74	9231.2	9230.97	518.23	593.935	508.094	782.076	808.726	650.165	2.84	3.19	2.72	4.3	4.38	3.49	643.537	0.466507	0.118513	3.93635	8.27287e-05	0.00295261
ENSG00000163874.10	ZC3H12A	protein_coding	zinc finger CCCH-type containing 12A [Source:HGNC Symbol;Acc:HGNC:26259]	2192.8	2224.16	2322.02	2278.2	2247.93	2275.79	952.425	898.869	850.167	1060.9	1202.16	1235.81	21.34	19.76	18.65	23.86	26.63	27.13	1033.4	0.374279	0.0950805	3.93644	8.26983e-05	0.00295261
ENSG00000170832.12	USP32	protein_coding	ubiquitin specific peptidase 32 [Source:HGNC Symbol;Acc:HGNC:19143]	3472.47	3546.64	3491.88	3494.24	3413.12	3486.45	22934.8	23603.8	24176.1	26918.8	27741.8	26802.7	332.88	336.24	343.59	392.18	398.15	381.09	25362.9	0.203957	0.0518273	3.93532	8.30848e-05	0.00295728
ENSG00000047644.18	WWC3	protein_coding	WWC family member 3 [Source:HGNC Symbol;Acc:HGNC:29237]	6309.69	5968.45	6169.3	6073.76	6168.86	6191.05	1217.04	1244.87	1207.35	1474.14	1470.7	1606.25	10.01	10.06	9.73	12.17	11.96	12.95	1370.05	0.312609	0.079613	3.92661	8.61527e-05	0.00305819
ENSG00000258947.6	TUBB3	protein_coding	tubulin beta 3 class III [Source:HGNC Symbol;Acc:HGNC:20772]	1573.29	1529.6	1543.42	1559.32	1553.12	1562.8	1726.03	1650.15	1605.72	1302.63	1363.51	1377.85	56.19	52.71	51.2	42.56	43.9	43.94	1504.32	-0.300767	0.0767451	-3.91904	8.89019e-05	0.00314727
ENSG00000211445.11	GPX3	protein_coding	glutathione peroxidase 3 [Source:HGNC Symbol;Acc:HGNC:4555]	1340.22	1364.18	1355.87	1406.58	1398.07	1396.46	815.051	843.817	936.955	1017.87	1147.5	1504.13	29.93	30.42	33.71	37.52	41.67	54.12	1044.22	0.501104	0.12807	3.91272	9.12623e-05	0.00322215
ENSG00000058804.11	NDC1	protein_coding	NDC1 transmembrane nucleoporin [Source:HGNC Symbol;Acc:HGNC:25525]	4646.38	4548.79	4767.52	4646.54	4952.2	4566.4	1942.64	2034.39	2122.59	1744.4	1552.17	1642.81	20.97	21.55	22.42	18.9	16.56	17.36	1839.83	-0.30405	0.0779233	-3.90191	9.54348e-05	0.00335285
ENSG00000130414.11	NDUFA10	protein_coding	NADH:ubiquinone oxidoreductase subunit A10 [Source:HGNC Symbol;Acc:HGNC:7684]	1004.85	1018.13	1020.79	1041.14	1031.4	1024.21	3932.6	3853.77	3769.22	3369.71	3209.72	3181.17	194.32	186.88	182.39	167.14	156.82	153.96	3552.72	-0.243746	0.0624699	-3.90181	9.54748e-05	0.00335285
ENSG00000174903.15	RAB1B	protein_coding	RAB1B, member RAS oncogene family [Source:HGNC Symbol;Acc:HGNC:18370]	1825.2	1817.43	1819.71	1825.74	1821.9	1820.83	8988.23	8149.99	8580.18	9698.72	10210.2	10553.5	249.48	222.03	233.2	270.22	280.23	286.95	9363.44	0.244052	0.0625669	3.90065	9.5935e-05	0.00335636
ENSG00000214530.8	STARD10	protein_coding	StAR related lipid transfer domain containing 10 [Source:HGNC Symbol;Acc:HGNC:10666]	582.096	510.659	501.111	537.414	529.55	540.964	4399.17	4706.8	5213.54	5471.68	5993.48	6189.56	417.35	438.25	484.3	521.07	562.23	575.22	5329.01	0.302147	0.0774682	3.90027	9.6086e-05	0.00335636
ENSG00000166689.15	PLEKHA7	protein_coding	pleckstrin homology domain containing A7 [Source:HGNC Symbol;Acc:HGNC:27049]	3058.56	2779.77	2848.33	3345.4	3007.12	3154.89	1107.47	1228.66	1228.96	873.795	968.361	951.239	18.5	20.14	20.11	14.66	15.99	15.56	1059.75	-0.352108	0.0903973	-3.89512	9.81504e-05	0.00341938
ENSG00000135114.12	OASL	protein_coding	2'-5'-oligoadenylate synthetase like [Source:HGNC Symbol;Acc:HGNC:8090]	2215.43	2195.45	2309.75	2402.94	2232.99	2202.01	1714.69	1533.9	1407.24	1946.9	2150.47	1869.04	38.39	33.7	30.85	43.76	47.6	40.99	1770.36	0.356516	0.0916582	3.88962	0.0001004	0.0034885
ENSG00000102763.17	VWA8	protein_coding	von Willebrand factor A domain containing 8 [Source:HGNC Symbol;Acc:HGNC:29071]	4966.27	6006.44	5392.65	6046.18	5048.97	5789.78	926.955	774.29	880.202	639.069	664.057	657.785	8.48	6.95	7.89	5.87	6.01	5.9	757.025	-0.396911	0.10231	-3.87948	0.000104679	0.00362758
ENSG00000214655.10	ZSWIM8	protein_coding	zinc finger SWIM-type containing 8 [Source:HGNC Symbol;Acc:HGNC:23528]	2043.99	1815.6	1873.37	1937.27	1700.08	1956.24	1530.69	1691.11	1435.23	1814.3	2147.95	1970.24	41.06	44.56	37.73	48.88	56.97	51.8	1764.88	0.34875	0.0899501	3.87715	0.000105687	0.00365289
ENSG00000134057.14	CCNB1	protein_coding	cyclin B1 [Source:HGNC Symbol;Acc:HGNC:1579]	1236.07	1187.5	1231.37	1237.08	1301.63	1226.75	5266.57	5648.87	5786.97	4856.19	4441.37	4693.46	215.42	226.77	231.77	199.38	179.63	188.06	5115.58	-0.255247	0.0658884	-3.87392	0.000107097	0.00369189
ENSG00000122042.9	UBL3	protein_coding	ubiquitin like 3 [Source:HGNC Symbol;Acc:HGNC:12504]	4205.54	4198.37	4201.72	4202.74	4202.2	4201.97	3089.01	3226.26	3181.73	3916.5	3707.17	3647.84	37.17	38.1	37.49	47.31	44.11	43	3461.41	0.247067	0.0638073	3.87207	0.000107915	0.00371035
ENSG00000105514.7	RAB3D	protein_coding	RAB3D, member RAS oncogene family [Source:HGNC Symbol;Acc:HGNC:9779]	4094.54	4087.37	4055.68	3935.33	4003.16	4090.97	1919.46	1911.32	2029.78	2319.6	2430.62	2320.52	24	23.45	24.85	29.12	30.05	28.42	2155.21	0.26943	0.0696279	3.86957	0.000109027	0.00373881
ENSG00000105971.14	CAV2	protein_coding	caveolin 2 [Source:HGNC Symbol;Acc:HGNC:1528]	1508.85	1379.68	1449.34	1633.36	1556.06	1203.47	180.636	209.326	193.176	118.126	97.6914	129.748	6.31	7.18	6.61	4.14	3.37	4.43	154.811	-0.748383	0.193451	-3.86859	0.000109465	0.00374404
ENSG00000215218.3	UBE2QL1	protein_coding	ubiquitin conjugating enzyme E2 Q family like 1 [Source:HGNC Symbol;Acc:HGNC:37269]	4138.54	4131.37	4134.72	4135.74	4135.2	4134.97	223.288	234.744	258.604	313.663	372.735	374.096	2.73	2.82	3.1	3.85	4.51	4.48	296.186	0.56415	0.146023	3.86342	0.00011181	0.00381432
ENSG00000185352.8	HS6ST3	protein_coding	heparan sulfate 6-O-sulfotransferase 3 [Source:HGNC Symbol;Acc:HGNC:19134]	7138.21	7098.07	7235.17	7150.17	7262.5	7228.96	217.662	245.442	277.308	140.352	181.062	134.766	1.53	1.7	1.91	0.99	1.26	0.93	199.442	-0.709953	0.183866	-3.86126	0.000112805	0.00383829
ENSG00000071282.11	LMCD1	protein_coding	LIM and cysteine rich domains 1 [Source:HGNC Symbol;Acc:HGNC:6633]	1053.28	1022.56	954.115	892.11	1073.6	979.462	157.091	178.404	222.033	240.588	318.918	361.369	7.99	8.88	11.06	12.31	16.02	17.97	246.386	0.727961	0.188864	3.85443	0.000116001	0.00390654
ENSG00000106003.12	LFNG	protein_coding	LFNG O-fucosylpeptide 3-beta-N-acetylglucosaminyltransferase [Source:HGNC Symbol;Acc:HGNC:6560]	1865.31	1799.88	1787.37	1787.62	1714.19	1795.12	708.016	704.654	706.143	487.614	559.58	554.964	19.99	19.53	19.52	13.82	15.62	15.35	620.164	-0.403771	0.104732	-3.8553	0.000115589	0.00390654
ENSG00000115641.18	FHL2	protein_coding	four and a half LIM domains 2 [Source:HGNC Symbol;Acc:HGNC:3703]	1333.31	1306.25	1313.95	1368.07	1336.91	1318.17	790.174	796.718	869.213	624.254	668.99	583.157	30.06	29.75	32.39	23.83	25.17	21.73	722.103	-0.393213	0.101969	-3.85619	0.000115168	0.00390654
ENSG00000163638.13	ADAMTS9	protein_coding	ADAM metallopeptidase with thrombospondin type 1 motif 9 [Source:HGNC Symbol;Acc:HGNC:13202]	3776.22	4731.34	7094.13	4433.93	4897.79	5168.22	119.117	180.351	80.2526	205.148	266.426	252.05	1.23	1.82	0.81	2.12	2.7	2.54	183.807	0.948008	0.245914	3.85504	0.000115712	0.00390654
ENSG00000005001.9	PRSS22	protein_coding	protease, serine 22 [Source:HGNC Symbol;Acc:HGNC:14368]	995.291	915.783	962.077	888.538	975.796	1002.34	337.09	340.539	283.956	406.77	514.01	468.055	17.83	17.68	14.71	21.61	26.89	24.26	391.734	0.531947	0.138074	3.85262	0.000116859	0.00392538
ENSG00000132967.9	HMGB1P5	transcribed_processed_pseudogene	high mobility group box 1 pseudogene 5 [Source:HGNC Symbol;Acc:HGNC:4997]	468.451	464.41	466.264	469.421	466.357	466.177	1749.2	1818.9	1895.03	1553.54	1468.29	1429.77	189.45	193.39	200.99	168.88	157.24	151.75	1652.46	-0.296236	0.0769342	-3.85051	0.000117873	0.00394934
ENSG00000168062.9	BATF2	protein_coding	basic leucine zipper ATF-like transcription factor 2 [Source:HGNC Symbol;Acc:HGNC:25163]	1970.43	1795.93	1959.07	1977.51	1975.51	1977.69	142.637	150.657	117.079	253.153	281.692	178.01	3.72	3.85	2.99	6.62	7.25	4.54	187.199	0.792976	0.206051	3.84845	0.000118868	0.00397255
ENSG00000138180.15	CEP55	protein_coding	centrosomal protein 55 [Source:HGNC Symbol;Acc:HGNC:1161]	2431.66	2442.9	2404.62	2426.58	2442.35	2425.73	2357.86	2390.5	2681.22	2111.01	1960.55	1969.41	49.09	48.84	54.66	44.12	40.36	40.16	2245.1	-0.299192	0.077799	-3.8457	0.000120208	0.00400714
ENSG00000137177.19	KIF13A	protein_coding	kinesin family member 13A [Source:HGNC Symbol;Acc:HGNC:14566]	5008.15	5000.96	5124.92	5101.5	4811.02	4994.28	2083.56	2120.76	2142.4	2553.26	2482.42	2520.65	21.05	21.03	21.19	25.9	24.8	24.95	2317.18	0.252048	0.0655754	3.84365	0.00012122	0.00403065
ENSG00000107263.18	RAPGEF1	protein_coding	Rap guanine nucleotide exchange factor 1 [Source:HGNC Symbol;Acc:HGNC:4568]	4200.45	4328.1	4557.39	4604	4918.45	4971.4	2473.55	2261.57	2322.91	2034.19	1803.79	1924.43	27.27	24.46	25.07	22.49	19.67	20.78	2136.75	-0.292525	0.0761674	-3.84056	0.000122754	0.00407135
ENSG00000122971.8	ACADS	protein_coding	acyl-CoA dehydrogenase, C-2 to C-3 short chain [Source:HGNC Symbol;Acc:HGNC:90]	1671.44	1713.05	1685.82	1688.26	1674.12	1700.57	261.449	208.875	221.797	340.684	359.727	326.888	7.83	6.14	6.5	10.24	10.65	9.59	286.572	0.565462	0.147265	3.83977	0.000123152	0.00407426
ENSG00000151914.19	DST	protein_coding	dystonin [Source:HGNC Symbol;Acc:HGNC:1090]	6135	6575.73	6619.05	5931.08	5459.18	5762.53	3307.27	3452.25	3354.77	3783.17	4159.74	4105.54	27.59	28.24	27.35	31.64	34.29	33.51	3693.78	0.252114	0.0656866	3.83813	0.000123976	0.00409121
ENSG00000033867.16	SLC4A7	protein_coding	solute carrier family 4 member 7 [Source:HGNC Symbol;Acc:HGNC:11033]	3945.28	4166.72	4204.85	4098.27	4294.85	4231.84	1973.56	2237.28	2162.72	1799.59	1718.6	1661.81	24.02	26.72	25.77	21.98	20.68	19.81	1925.61	-0.299699	0.0781813	-3.83338	0.000126393	0.00415012
ENSG00000168938.5	PPIC	protein_coding	peptidylprolyl isomerase C [Source:HGNC Symbol;Acc:HGNC:9256]	1196.7	1191.07	1194.79	1194.15	1194.85	1193.2	2140.55	2145.73	2183.1	2552.61	2517.53	2633.71	90.64	89.18	90.52	108.5	105.41	109.25	2362.2	0.252437	0.0658518	3.83342	0.000126375	0.00415012
ENSG00000115461.4	IGFBP5	protein_coding	insulin like growth factor binding protein 5 [Source:HGNC Symbol;Acc:HGNC:5474]	5905.88	5971.87	5965.83	5942.49	6008.91	5895.96	9776.02	7985.6	8009	6082.56	4038.9	4214.96	83.11	66.63	66.67	51.9	33.95	35.1	6684.61	-0.846229	0.220817	-3.83226	0.000126969	0.00415863
ENSG00000077514.8	POLD3	protein_coding	DNA polymerase delta 3, accessory subunit [Source:HGNC Symbol;Acc:HGNC:20932]	2587.57	2788.69	2675.72	2877.69	3065.69	2539.78	1401.03	1384.37	1424.8	1167.39	1051.41	1163.9	25.76	24.98	25.66	21.55	19.12	20.97	1265.48	-0.314436	0.0820921	-3.83029	0.000127992	0.00418172
ENSG00000167081.16	PBX3	protein_coding	PBX homeobox 3 [Source:HGNC Symbol;Acc:HGNC:8634]	1949.06	2064.68	2019.57	1892.16	2041.32	1931.27	1527.29	1580.35	1501.55	1309.94	1243.85	1166	38.96	39.58	37.51	33.55	31.37	29.14	1388.17	-0.310321	0.081093	-3.82673	0.000129858	0.00423214
ENSG00000167578.17	RAB4B	protein_coding	RAB4B, member RAS oncogene family [Source:HGNC Symbol;Acc:HGNC:9782]	881.743	866.822	873.016	845.369	868.698	878.355	375.362	332.775	315.748	492.512	460.33	472.683	21.87	19.02	17.99	28.74	26.53	26.92	408.233	0.477746	0.124882	3.82556	0.000130474	0.00424169
ENSG00000137807.13	KIF23	protein_coding	kinesin family member 23 [Source:HGNC Symbol;Acc:HGNC:6392]	2551.86	2404.51	2507.34	2609.39	2562.72	2648.21	2720.81	2828.99	2777.66	2428.94	2304.89	2191.77	54.04	55.14	54.01	48.43	45.26	42.65	2542.17	-0.266328	0.069633	-3.82474	0.000130911	0.00424538
ENSG00000100522.8	GNPNAT1	protein_coding	glucosamine-phosphate N-acetyltransferase 1 [Source:HGNC Symbol;Acc:HGNC:19980]	2844.04	2758.96	2985.32	3211.84	3113.86	3178.97	3299.54	3778.42	3680.07	2863.12	2924.81	3071.76	55.42	62.28	60.53	48.27	48.57	50.54	3269.64	-0.279346	0.0730916	-3.82187	0.000132444	0.00427966
ENSG00000179222.17	MAGED1	protein_coding	MAGE family member D1 [Source:HGNC Symbol;Acc:HGNC:6813]	2191.87	2319.63	2384.61	2335.2	2340.85	2242.91	4552.59	3988.63	3865.66	4971.49	5060.77	5004.58	100.01	86.01	83.16	109.64	109.95	107.71	4573.95	0.27741	0.072591	3.82154	0.000132619	0.00427966
ENSG00000180611.6	MB21D2	protein_coding	Mab-21 domain containing 2 [Source:HGNC Symbol;Acc:HGNC:30438]	3189.54	3182.37	3185.72	3186.74	3186.2	3185.97	809.782	876.838	886.547	1019.36	1170.68	1101.88	12.85	13.66	13.78	16.24	18.37	17.13	977.508	0.35433	0.092946	3.81221	0.00013773	0.0044337
ENSG00000151532.13	VTI1A	protein_coding	vesicle transport through interaction with t-SNAREs 1A [Source:HGNC Symbol;Acc:HGNC:17792]	2618.36	2305.77	2645.69	2677.44	2568.68	2838.85	902.529	1219.47	1024.57	804.596	792.607	726.015	17.52	23.23	19.48	15.69	15.22	13.82	911.589	-0.435456	0.114325	-3.80893	0.000139567	0.00448186
ENSG00000198901.13	PRC1	protein_coding	protein regulator of cytokinesis 1 [Source:HGNC Symbol;Acc:HGNC:9341]	1537.29	1517.76	1541.5	1550.81	1635.82	1544.61	8429.84	8207.23	8380.15	7421.65	7044.52	7170.58	274.27	262.08	266.98	242.41	226.67	228.55	7775.67	-0.209495	0.0551128	-3.8012	0.000143997	0.00461281
ENSG00000116127.17	ALMS1	protein_coding	ALMS1, centrosome and basal body associated protein [Source:HGNC Symbol;Acc:HGNC:428]	5930.31	6353.54	6447.26	6102.01	6455.41	7169.97	1637	1607.65	1636.44	1441.95	1237.71	1169.84	12.94	12.47	12.66	11.44	9.68	9.06	1455.05	-0.34391	0.0905026	-3.8	0.000144698	0.004624
ENSG00000197386.10	HTT	protein_coding	huntingtin [Source:HGNC Symbol;Acc:HGNC:4851]	7454.64	8442.18	7456.88	9252.93	7906.73	8127.53	5090.96	4262.58	5065.43	3506.61	3944.35	4082.2	31.83	26.17	31.02	22.01	24.4	25.01	4325.35	-0.322552	0.0849616	-3.79644	0.000146787	0.00467937
ENSG00000131558.14	EXOC4	protein_coding	exocyst complex component 4 [Source:HGNC Symbol;Acc:HGNC:30389]	3052.61	3402.76	3379.78	3200.44	3161.4	3415.47	2793.46	2638.04	2656.65	2384.44	2183.82	2069.61	43.25	40.09	40.28	37.06	33.43	31.38	2454.37	-0.286254	0.0754546	-3.79372	0.000148406	0.00471954
ENSG00000127483.17	HP1BP3	protein_coding	heterochromatin protein 1 binding protein 3 [Source:HGNC Symbol;Acc:HGNC:24973]	2109.31	2301.36	2103.17	2267.4	2454.91	2184.38	5304.51	4989.94	5221.83	4600.37	3937.26	4331.86	120.09	110.87	115.76	104.55	88.15	96.06	4730.97	-0.269569	0.0710876	-3.79207	0.000149399	0.00473963
ENSG00000086065.13	CHMP5	protein_coding	charged multivesicular body protein 5 [Source:HGNC Symbol;Acc:HGNC:26942]	1297.72	1292.47	1295.47	1293.18	1293.11	1292.06	2700.16	3089.97	2794.12	3466.99	3750.21	3303.12	105.52	118.51	106.91	136	144.91	126.44	3184.09	0.293017	0.0772969	3.7908	0.000150162	0.00475235
ENSG00000141696.12	P3H4	protein_coding	prolyl 3-hydroxylase family member 4 (non-enzymatic) [Source:HGNC Symbol;Acc:HGNC:16946]	2237.77	2125.62	2165.95	1996.3	2118.35	2270.99	409.545	389.754	365.849	527.779	540.996	510.503	9.63	8.99	8.42	12.45	12.58	11.76	457.405	0.437568	0.115476	3.78926	0.000151095	0.00476408
ENSG00000185420.18	SMYD3	protein_coding	SET and MYND domain containing 3 [Source:HGNC Symbol;Acc:HGNC:15513]	1125.35	1125.82	1064.68	1127.16	1115.57	1110.84	578.093	596.134	631.243	458.671	439.705	459.24	26.31	26.62	28.13	20.95	19.78	20.47	527.183	-0.410374	0.108307	-3.789	0.000151258	0.00476408
ENSG00000143412.9	ANXA9	protein_coding	annexin A9 [Source:HGNC Symbol;Acc:HGNC:547]	1644.89	1633.85	1641.23	1641.81	1632.12	1639.43	5459.18	5658.62	5583.3	6229.8	6884.49	6514.9	168.44	171.36	168.68	192.95	210.04	196.91	6055.04	0.232671	0.0614601	3.78572	0.000153263	0.0048157
ENSG00000125730.16	C3	protein_coding	complement C3 [Source:HGNC Symbol;Acc:HGNC:1318]	2268.53	2571.25	2491.02	2373.63	2421.04	2255.87	1273.82	1019.14	1169.62	1549.66	1374.66	1550.84	26.91	21.11	24.18	32.85	28.69	32.07	1322.96	0.370354	0.0979432	3.78132	0.000156001	0.00489001
ENSG00000106546.12	AHR	protein_coding	aryl hydrocarbon receptor [Source:HGNC Symbol;Acc:HGNC:348]	4518.65	4474.22	5484.31	3566.64	3932.03	3974.61	708.497	841.81	696.931	979.416	945.609	996.536	8.36	9.75	8.06	11.6	11.04	11.52	861.463	0.383158	0.10136	3.78015	0.000156732	0.00490123
ENSG00000096006.11	CRISP3	protein_coding	cysteine rich secretory protein 3 [Source:HGNC Symbol;Acc:HGNC:16904]	1591.24	1984.37	1987.72	1994.35	1679.09	1987.97	29.6564	53.1798	42.582	66.2305	110.473	114.803	0.81	1.42	1.13	1.8	2.97	3.05	69.4783	1.21441	0.32141	3.77837	0.000157855	0.00492463
ENSG00000124508.16	BTN2A2	protein_coding	butyrophilin subfamily 2 member A2 [Source:HGNC Symbol;Acc:HGNC:1137]	2138.71	2303.19	2625.43	2064.95	2105.87	2268.59	179.392	173.287	131.319	267.324	282.442	226.996	4.04	3.83	2.9	6.05	6.3	5.02	210.148	0.684814	0.181478	3.77353	0.000160955	0.00500942
ENSG00000138650.8	PCDH10	protein_coding	protocadherin 10 [Source:HGNC Symbol;Acc:HGNC:13404]	4842.7	5099.77	5540.04	5222.35	5037.23	4640.45	1264.79	1043.5	949.958	1456.15	1412.75	1405.15	12.65	10.24	9.3	14.62	13.98	13.76	1255.39	0.392509	0.104096	3.77064	0.000162831	0.00505586
ENSG00000159176.13	CSRP1	protein_coding	cysteine and glycine rich protein 1 [Source:HGNC Symbol;Acc:HGNC:2469]	1804.21	1821.97	1814.16	1805.58	1803.65	1803.3	8071.9	7765.74	8504.63	9349.57	9283.14	9908.26	225.66	213.1	232.82	262.35	256.61	271.32	8813.79	0.229374	0.0609502	3.7633	0.000167688	0.00519438
ENSG00000118965.14	WDR35	protein_coding	WD repeat domain 35 [Source:HGNC Symbol;Acc:HGNC:29250]	4481.33	4655.68	4621.09	5753.42	5395.08	5014.54	259.7	287.657	288.562	170.643	170.947	207.091	2.64	2.87	2.88	1.74	1.72	2.06	230.785	-0.603957	0.160623	-3.76009	0.00016985	0.00524896
ENSG00000137193.13	PIM1	protein_coding	Pim-1 proto-oncogene, serine/threonine kinase [Source:HGNC Symbol;Acc:HGNC:8986]	2444.03	2433.53	2362.86	2233.3	2468.2	2264.66	529.905	481.388	540.19	402.924	359.894	375.468	11.33	10.1	11.3	8.65	7.61	7.87	448.284	-0.44747	0.119042	-3.75894	0.000170637	0.0052609
ENSG00000197299.10	BLM	protein_coding	Bloom syndrome RecQ like helicase [Source:HGNC Symbol;Acc:HGNC:1058]	3841.68	4270.26	4136.39	4578.01	4287.23	4426.65	1190.18	1132.23	1167.22	974.512	933.844	883.842	14.17	13.22	13.6	11.64	10.99	10.3	1046.99	-0.323491	0.0860728	-3.75834	0.000171045	0.00526114
ENSG00000113368.11	LMNB1	protein_coding	lamin B1 [Source:HGNC Symbol;Acc:HGNC:6637]	2192.39	2142.97	2125.19	2214.18	2221.18	2191.73	5965.51	5863.54	6555.38	5335.69	4977.33	5161.94	138.32	133.43	148.83	124.18	114.11	117.23	5643.25	-0.248792	0.0662705	-3.75419	0.000173904	0.00533657
ENSG00000142186.16	SCYL1	protein_coding	SCY1 like pseudokinase 1 [Source:HGNC Symbol;Acc:HGNC:14372]	2037.91	2113.12	2073	2008.75	1986.41	1987.35	3116.16	2667.44	2729.14	3283.01	3598.87	3552.62	77.47	65.08	66.43	81.91	88.47	86.52	3157.86	0.293133	0.0781924	3.74888	0.000177629	0.00543819
ENSG00000072571.19	HMMR	protein_coding	hyaluronan mediated motility receptor [Source:HGNC Symbol;Acc:HGNC:5012]	2145.38	2066.66	2172.07	2091.35	1988.55	2231.9	1053.15	1149.98	1125.15	918.982	894.313	725.075	25.18	26.98	26.35	22.06	21.15	16.99	977.767	-0.394728	0.10548	-3.74219	0.000182421	0.00557192
ENSG00000107201.9	DDX58	protein_coding	DExD/H-box helicase 58 [Source:HGNC Symbol;Acc:HGNC:19102]	4159.9	4165.35	4164.68	4171.74	4166.03	4160.02	2731.83	3515.1	2867.48	4030.54	4209.11	3506.22	33.17	41.89	34.09	49.12	50.53	41.7	3476.72	0.365907	0.0977951	3.74157	0.000182874	0.00557279
ENSG00000104381.12	GDAP1	protein_coding	ganglioside induced differentiation associated protein 1 [Source:HGNC Symbol;Acc:HGNC:15968]	2786.31	3374.73	2926.28	2979.87	3036.64	2824.73	829.864	789.944	834.324	1007.43	1177.45	984.734	14.07	13.15	13.85	17.15	19.74	16.36	937.289	0.365911	0.0978608	3.73909	0.000184687	0.00561499
ENSG00000166473.17	PKD1L2	polymorphic_pseudogene	polycystin 1 like 2 (gene/pseudogene) [Source:HGNC Symbol;Acc:HGNC:21715]	2094.31	2094.19	1931.68	1920.89	1855.22	1891.01	66.97	76.4387	85.6014	24.1453	39.8528	35.5978	1.72	1.91	2.16	0.61	1.01	0.9	54.8319	-1.21268	0.325032	-3.73095	0.000190757	0.00578616
ENSG00000197712.11	FAM114A1	protein_coding	family with sequence similarity 114 member A1 [Source:HGNC Symbol;Acc:HGNC:25087]	1966.44	2208.82	1777.93	1885.06	1700.57	1914.05	226.684	202.959	224.513	327.417	347.714	290.607	6.03	5.3	5.85	8.73	9.15	7.56	269.972	0.554491	0.148645	3.7303	0.000191249	0.00578769
ENSG00000068078.17	FGFR3	protein_coding	fibroblast growth factor receptor 3 [Source:HGNC Symbol;Acc:HGNC:3690]	2864.49	2932.95	2943.61	3365.6	3222.47	3267.19	407.439	302.337	317.757	216.258	192.474	254.431	6.66	4.86	5.09	3.54	3.12	4.08	281.763	-0.625635	0.167766	-3.72921	0.00019208	0.00579949
ENSG00000070159.13	PTPN3	protein_coding	protein tyrosine phosphatase, non-receptor type 3 [Source:HGNC Symbol;Acc:HGNC:9655]	4961.01	5453.61	5378.07	6289.06	6574.58	6624.44	1609.47	1425.49	1412.22	1241.03	1180.67	1134.25	13.93	12.1	11.96	10.78	10.1	9.61	1333.86	-0.323421	0.086786	-3.72665	0.00019404	0.00584523
ENSG00000204261.8	PSMB8-AS1	lincRNA	PSMB8 antisense RNA 1 (head to head) [Source:HGNC Symbol;Acc:HGNC:39758]	884	823.26	808.127	801.938	801.12	861.825	87.4385	100.454	104.295	196.684	200.625	129.705	5.33	6.03	6.22	12.05	12.07	7.73	136.534	0.842029	0.225999	3.72581	0.000194691	0.00585142
ENSG00000149328.14	GLB1L2	protein_coding	galactosidase beta 1 like 2 [Source:HGNC Symbol;Acc:HGNC:25129]	2864.31	2862.78	2891.86	2852.83	2871.51	2969.76	406.469	381.394	374.207	287.939	251.488	282.498	7.13	6.56	6.43	5.06	4.36	4.85	330.69	-0.497055	0.133448	-3.72469	0.000195553	0.00586391
ENSG00000168280.16	KIF5C	protein_coding	kinesin family member 5C [Source:HGNC Symbol;Acc:HGNC:6325]	6469.12	6604.15	6353.63	6500.27	6593.1	6643.88	132.355	193.709	185.85	256.733	314.371	253.547	1.03	1.47	1.41	2	2.41	1.92	222.71	0.68459	0.183851	3.72361	0.000196391	0.00587564
ENSG00000137812.19	KNL1	protein_coding	kinetochore scaffold 1 [Source:HGNC Symbol;Acc:HGNC:24054]	6127.79	7260.95	6810.05	7317.4	6459.09	6688.25	1491.08	1276.09	1436.82	1095.42	1161.19	1094.52	11.15	9.36	10.52	8.22	8.59	8.02	1259.16	-0.328496	0.0882343	-3.723	0.000196869	0.00587655
ENSG00000168615.11	ADAM9	protein_coding	ADAM metallopeptidase domain 9 [Source:HGNC Symbol;Acc:HGNC:216]	3492.41	3470.1	3379.34	3470.09	3318.04	3496.44	1944.68	2399.33	2409.85	1816.49	1817.69	1697.37	28.6	34.64	34.71	26.82	26.45	24.46	2014.23	-0.341494	0.0918032	-3.71984	0.000199345	0.00593697
ENSG00000135924.15	DNAJB2	protein_coding	DnaJ heat shock protein family (Hsp40) member B2 [Source:HGNC Symbol;Acc:HGNC:5228]	1978.3	1763.96	1868.2	1806.38	1854.29	1882.26	1068.8	1273.17	1116.42	1456.24	1464.07	1415.56	29.08	34.01	29.75	39.79	39.41	37.74	1299.07	0.328612	0.0883884	3.71782	0.000200952	0.0059578
ENSG00000197102.10	DYNC1H1	protein_coding	dynein cytoplasmic 1 heavy chain 1 [Source:HGNC Symbol;Acc:HGNC:2961]	6199.32	6009.74	5873.36	5693.86	5216.15	6077.65	17691.4	17504.3	17853.4	20127.5	21450.3	19664.8	153.29	148.86	151.48	175.07	183.8	166.91	19048.6	0.206759	0.055611	3.71796	0.000200842	0.0059578
ENSG00000150961.14	SEC24D	protein_coding	SEC24 homolog D, COPII coat complex component [Source:HGNC Symbol;Acc:HGNC:10706]	3592.96	3341.57	3417.73	3465.03	3412.55	3493.44	1953.79	2377.87	2207.68	2560.94	2881.15	2703.73	28.61	34.17	31.66	37.64	41.72	38.78	2447.51	0.317109	0.0853274	3.71638	0.0002021	0.00597833
ENSG00000113758.13	DBN1	protein_coding	drebrin 1 [Source:HGNC Symbol;Acc:HGNC:2695]	2343.68	2099.27	2165.93	2217.26	2341.29	2288.52	2347.73	2505.88	2217.09	2046.68	1891.93	1840.23	52.98	55.49	48.99	46.36	42.21	40.68	2141.6	-0.290604	0.0782589	-3.71337	0.00020452	0.00603633
ENSG00000155792.9	DEPTOR	protein_coding	DEP domain containing MTOR interacting protein [Source:HGNC Symbol;Acc:HGNC:22953]	2390.54	2383.37	2386.72	2387.74	2362.41	2386.97	521.285	551.675	534.488	403.146	405.846	397.1	11.06	11.48	11.1	8.59	8.52	8.25	468.923	-0.414438	0.111632	-3.71254	0.000205193	0.00604262
ENSG00000277669.1	AC009086.2	protein_coding		431.61	424.44	427.79	428.81	428.26	428.04	115.778	57.146	81.8569	167.343	168.164	150.327	13.71	6.63	9.44	19.82	19.64	17.42	123.434	0.920033	0.247941	3.71069	0.000206698	0.00607332
ENSG00000123739.10	PLA2G12A	protein_coding	phospholipase A2 group XIIA [Source:HGNC Symbol;Acc:HGNC:18554]	857.926	931.595	808.731	918.414	891.71	787.347	1347.12	1281.33	1524.72	1042.37	1103.39	1135.07	78.8	73.56	87.36	61.22	63.85	65.07	1238.99	-0.340425	0.0917648	-3.70975	0.000207462	0.00608217
ENSG00000125633.10	CCDC93	protein_coding	coiled-coil domain containing 93 [Source:HGNC Symbol;Acc:HGNC:25611]	4702.9	4427.05	4900.86	5047.31	5472.49	5777.58	1127.39	1273.01	1105.81	985.901	887.614	871.871	11.33	12.55	10.88	9.93	8.81	8.58	1041.96	-0.352625	0.0951924	-3.70434	0.000211945	0.00619976
ENSG00000118193.11	KIF14	protein_coding	kinesin family member 14 [Source:HGNC Symbol;Acc:HGNC:19181]	6930.91	6848.77	6895.21	6891.87	6894.47	6841.06	1835.81	1819.77	1847.44	1622.49	1451.02	1418.54	13.49	13.12	13.29	11.96	10.54	10.21	1665.85	-0.293491	0.0793882	-3.69691	0.000218243	0.00635565
ENSG00000145425.9	RPS3A	protein_coding	ribosomal protein S3A [Source:HGNC Symbol;Acc:HGNC:10421]	721.777	711.34	718.114	713.902	715.528	719.26	29623.9	34391	36154.5	27591.9	28116.8	27560.5	2090.29	2381.62	2497.97	1954.31	1961.73	1904.98	30573.2	-0.266705	0.0721342	-3.69734	0.000217872	0.00635565
ENSG00000100083.18	GGA1	protein_coding	golgi associated, gamma adaptin ear containing, ARF binding protein 1 [Source:HGNC Symbol;Acc:HGNC:17842]	2006.62	1874.08	1905.08	2064.72	1832.17	2038.18	1189.64	1044.14	1054.46	825.562	905.849	860.258	30.82	26.55	26.75	21.48	23.21	21.83	979.979	-0.345962	0.0936268	-3.69512	0.000219785	0.00638641
ENSG00000172936.12	MYD88	protein_coding	myeloid differentiation primary response 88 [Source:HGNC Symbol;Acc:HGNC:7562]	2583.34	2615.34	2589.92	2602.41	2599.71	2601.04	2133.27	2110.8	2122.83	2440.59	2524.72	2578.61	41.51	40.32	40.45	47.67	48.58	49.16	2318.46	0.244888	0.0664534	3.68511	0.000228602	0.00662793
ENSG00000066279.17	ASPM	protein_coding	abnormal spindle microtubule assembly [Source:HGNC Symbol;Acc:HGNC:19048]	8532.43	8375.15	8490.08	8350.97	8105.06	8487.24	3196.1	3217.36	3413.74	2961.43	2594.75	2458.28	19.27	19.03	20.15	17.92	15.46	14.52	2973.61	-0.29504	0.0801594	-3.68066	0.000232631	0.0067299
ENSG00000059378.12	PARP12	protein_coding	poly(ADP-ribose) polymerase family member 12 [Source:HGNC Symbol;Acc:HGNC:21919]	2092.36	2093.18	2186	2174.67	2146.43	2173.81	2196.33	2266.55	2020.85	2624.78	2899.37	2465.15	51.81	52.46	46.67	62.13	67.62	56.96	2412.17	0.300381	0.0816974	3.67676	0.000236219	0.00677402
ENSG00000078114.18	NEBL	protein_coding	nebulette [Source:HGNC Symbol;Acc:HGNC:16932]	5331.99	5291.64	5523.05	5436.75	4876.97	5392.15	1494.17	1710.48	1630.56	1246.36	1403.63	1203.67	14.23	16.01	15.22	11.94	13.22	11.24	1448.12	-0.329742	0.0896466	-3.67824	0.000234846	0.00677402
ENSG00000203811.1	HIST2H3C	protein_coding	histone cluster 2 H3 family member c [Source:HGNC Symbol;Acc:HGNC:20503]	1477.54	1470.37	1473.72	1474.74	1474.2	1473.97	439.586	400.963	394.992	526.202	569.167	557.905	15.09	13.48	13.27	18.12	19.29	18.75	481.467	0.419276	0.114029	3.67694	0.000236049	0.00677402
ENSG00000203852.3	HIST2H3A	protein_coding	histone cluster 2 H3 family member a [Source:HGNC Symbol;Acc:HGNC:20505]	1477.54	1470.37	1473.72	1474.74	1474.2	1473.97	439.586	400.963	394.992	526.202	569.167	557.905	15.09	13.48	13.27	18.12	19.29	18.75	481.467	0.419276	0.114029	3.67694	0.000236049	0.00677402
ENSG00000095397.13	WHRN	protein_coding	whirlin [Source:HGNC Symbol;Acc:HGNC:16361]	2833.51	2672.31	2499.03	2496.59	2599.79	2307.58	335.526	366.195	296.542	228.302	234.804	222.255	6.62	7.09	5.73	4.52	4.58	4.29	280.608	-0.541837	0.147506	-3.67331	0.000239424	0.00683608
ENSG00000112763.15	BTN2A1	protein_coding	butyrophilin subfamily 2 member A1 [Source:HGNC Symbol;Acc:HGNC:1136]	2758.25	2726.43	2569.35	2298.37	2429.49	2427.31	828.858	826.19	888.929	1078.3	1109.59	1012.85	16.57	16.21	17.4	21.64	21.94	19.83	957.458	0.328792	0.0894971	3.67377	0.000238995	0.00683608
ENSG00000090975.12	PITPNM2	protein_coding	phosphatidylinositol transfer protein membrane associated 2 [Source:HGNC Symbol;Acc:HGNC:21044]	5728.7	5438.2	5532.51	5221.56	5820.42	5572.63	368.071	294.799	305.748	211.216	210.392	231.792	3.36	2.63	2.73	1.94	1.9	2.07	270.308	-0.564319	0.153736	-3.6707	0.000241889	0.00689146
ENSG00000177663.13	IL17RA	protein_coding	interleukin 17 receptor A [Source:HGNC Symbol;Acc:HGNC:5985]	7962.66	7169.26	7812.09	6136.55	5857.46	7063.59	727.087	783.744	696.563	955.917	1053.01	866.207	5.29	5.59	4.96	6.97	7.57	6.17	847.068	0.377686	0.10322	3.65905	0.000253153	0.00719676
ENSG00000234127.8	TRIM26	protein_coding	tripartite motif containing 26 [Source:HGNC Symbol;Acc:HGNC:12962]	2686.39	2658.94	2632.02	2590.99	2689.98	2593	2463.48	2495.48	2549.6	2957.39	2862.24	3022.96	47.16	46.88	47.79	56.83	54.18	56.68	2725.18	0.236398	0.0646847	3.65462	0.000257562	0.00730632
ENSG00000279117.1	AP001972.5	TEC		2159.54	2152.37	2155.72	2156.74	2156.2	2155.97	433.588	431.287	496.593	540.238	629.732	713.088	10.17	9.93	11.4	12.72	14.6	16.38	540.749	0.468497	0.128418	3.64822	0.000264062	0.00747454
ENSG00000100714.15	MTHFD1	protein_coding	methylenetetrahydrofolate dehydrogenase, cyclohydrolase and formyltetrahydrofolate synthetase 1 [Source:HGNC Symbol;Acc:HGNC:7432]	2149.48	2078.86	2146.41	2158.36	2201.87	2226.05	8892.24	8827.87	9155.27	7991.62	7570.71	7803.77	208.22	202.86	209.89	187.84	175.27	179	8373.58	-0.20182	0.0553388	-3.647	0.000265322	0.00749405
ENSG00000174837.14	ADGRE1	protein_coding	adhesion G protein-coupled receptor E1 [Source:HGNC Symbol;Acc:HGNC:3336]	2388.54	2381.37	2384.72	2406.31	2422.11	2402.22	41.7748	54.7528	34.8837	102.761	94.5704	77.4417	0.88	1.13	0.72	2.17	1.97	1.6	67.6958	1.0713	0.293851	3.64573	0.000266629	0.00749872
ENSG00000181982.18	CCDC149	protein_coding	coiled-coil domain containing 149 [Source:HGNC Symbol;Acc:HGNC:25405]	2397.28	2916.73	2749.67	2739.23	3297.75	2937.88	359.532	290.991	361.807	247.241	212.24	231.84	6.43	5.11	6.34	4.43	3.76	4.07	283.942	-0.552207	0.151453	-3.64607	0.000266286	0.00749872
ENSG00000028203.17	VEZT	protein_coding	vezatin, adherens junctions transmembrane protein [Source:HGNC Symbol;Acc:HGNC:18258]	2322.1	2400.22	2483.21	2204.2	2207.83	2190.92	1922.1	2034.61	2080.96	2392.18	2481.32	2344.73	42.28	43.92	44.82	52.82	53.98	50.54	2209.33	0.256823	0.0704829	3.64377	0.000268678	0.0075402
ENSG00000162599.15	NFIA	protein_coding	nuclear factor I A [Source:HGNC Symbol;Acc:HGNC:7784]	2930.28	2634.5	2690.96	3716.91	3209.76	2380.81	239.647	333.799	291.631	157.376	154.198	222.558	4.18	5.72	5	2.76	2.67	3.81	233.202	-0.691509	0.190019	-3.63915	0.000273534	0.00766013
ENSG00000132478.9	UNK	protein_coding	unkempt family zinc finger [Source:HGNC Symbol;Acc:HGNC:29369]	1513.34	1464.75	1403.17	1527.5	1482.07	1444.37	2015.2	1921.91	2118.03	1691.64	1697.3	1643.93	69.22	64.79	71.23	58.33	57.66	55.34	1848	-0.26809	0.0736973	-3.63771	0.000275072	0.00768679
ENSG00000131269.15	ABCB7	protein_coding	ATP binding cassette subfamily B member 7 [Source:HGNC Symbol;Acc:HGNC:48]	2086.86	2017.91	1979.36	2008.33	2189.77	2038.41	503.61	497.8	522.515	388.649	382.135	374.167	12.41	12.04	12.6	9.61	9.31	9.03	444.813	-0.413945	0.114022	-3.63038	0.000282999	0.0078748
ENSG00000174306.21	ZHX3	protein_coding	zinc fingers and homeoboxes 3 [Source:HGNC Symbol;Acc:HGNC:15935]	5146.56	4553.73	4749.54	5072.64	5098.15	5224.47	1955.56	2180.56	2196.75	1662.55	1753.29	1785.69	19.9	21.79	21.9	16.98	17.64	17.8	1922.44	-0.283374	0.078054	-3.63048	0.000282894	0.0078748
ENSG00000119673.14	ACOT2	protein_coding	acyl-CoA thioesterase 2 [Source:HGNC Symbol;Acc:HGNC:18431]	1503.54	1480.41	1427.87	1440.3	1479.32	1396.75	567.931	477.468	523.348	717.021	657.451	690.526	19.76	16.31	17.82	25.02	22.61	23.51	605.616	0.395128	0.109006	3.62482	0.000289159	0.0080292
ENSG00000136270.13	TBRG4	protein_coding	transforming growth factor beta regulator 4 [Source:HGNC Symbol;Acc:HGNC:17443]	1665.29	1654.78	1663.69	1617.77	1572.97	1575.93	3006.29	2657.38	2867.1	2362.77	2268.18	2458.66	93.58	81.18	87.38	73.81	69.81	74.96	2603.41	-0.26674	0.073703	-3.61912	0.000295611	0.00817381
ENSG00000173801.16	JUP	protein_coding	junction plakoglobin [Source:HGNC Symbol;Acc:HGNC:6207]	2928.71	2943.42	2932.88	2899.56	2864.53	2919.72	7288.9	6516.26	6888.27	7525.18	8626.02	8749.76	126.46	110.95	117.02	131.04	147.97	148.7	7599.02	0.266702	0.0736823	3.61962	0.000295041	0.00817381
ENSG00000184702.18	2005-09-01	protein_coding	septin 5 [Source:HGNC Symbol;Acc:HGNC:9164]	1408.77	1356.69	1626.02	1566.58	1552.02	1549.15	456.769	488.259	361.354	353.417	240.391	259.79	15.31	16.08	11.87	11.92	7.99	8.55	359.98	-0.60762	0.168078	-3.61511	0.000300225	0.00828393
ENSG00000132109.9	TRIM21	protein_coding	tripartite motif containing 21 [Source:HGNC Symbol;Acc:HGNC:11312]	1704.3	1705.11	1586.22	1679.93	1560.43	1550.39	532.93	565.273	554.253	697.25	729.393	696.294	16.54	17.21	16.84	21.72	22.38	21.16	629.229	0.360678	0.0998787	3.61116	0.000304829	0.00839334
ENSG00000133424.20	LARGE1	protein_coding	LARGE xylosyl- and glucuronyltransferase 1 [Source:HGNC Symbol;Acc:HGNC:6511]	4055.66	3945.67	4066.23	4003.16	3852.79	3947.37	1549.37	1577.43	1585.63	1298.14	1287.89	1323.51	19.69	19.68	19.74	16.57	16.19	16.48	1437	-0.268859	0.0744663	-3.61048	0.000305626	0.00839767
ENSG00000100335.13	MIEF1	protein_coding	mitochondrial elongation factor 1 [Source:HGNC Symbol;Acc:HGNC:25979]	4525.19	4224.38	4742	3905.26	3232.74	3499.97	922.663	1027.15	933.799	1093.04	1287.25	1291.77	11.7	12.8	11.6	13.92	16.16	16.05	1092.63	0.348986	0.0967185	3.60827	0.000308247	0.00845201
ENSG00000196747.4	HIST1H2AI	protein_coding	histone cluster 1 H2A family member i [Source:HGNC Symbol;Acc:HGNC:4725]	324.69	317.56	320.89	321.9	321.36	321.14	149.493	189.118	186.089	228.376	304.013	281.068	23.53	29.13	28.63	36.12	47.32	43.31	223.024	0.63249	0.17538	3.60639	0.000310486	0.00849567
ENSG00000110046.12	ATG2A	protein_coding	autophagy related 2A [Source:HGNC Symbol;Acc:HGNC:29028]	4059.47	4099.69	4246.27	3997.62	3923.76	4214.88	1178.27	996.636	929.918	1257.07	1351.74	1384.2	14.58	12.1	11.26	15.61	16.53	16.76	1182.98	0.363531	0.100834	3.60526	0.000311842	0.00851504
ENSG00000112984.11	KIF20A	protein_coding	kinesin family member 20A [Source:HGNC Symbol;Acc:HGNC:9787]	2871.35	2770.92	2907.22	2854.4	2866.51	2889.1	3012.2	2724.38	2961.93	2539.01	2377.39	2363.87	53.26	47.29	51.28	45.07	41.57	40.95	2663.12	-0.257746	0.0715997	-3.59982	0.000318438	0.00866417
ENSG00000171345.13	KRT19	protein_coding	keratin 19 [Source:HGNC Symbol;Acc:HGNC:6436]	1179.12	1175.59	1179.43	1176.42	1177.69	1175.61	55058.2	52634.9	52095.8	58038.6	63695.7	62708	2364.83	2218.78	2191	2502.29	2705.17	2638.4	57371.7	0.206893	0.0574755	3.59967	0.000318623	0.00866417
ENSG00000103479.15	RBL2	protein_coding	RB transcriptional corepressor like 2 [Source:HGNC Symbol;Acc:HGNC:9894]	3574.5	3692.58	3805.04	3579.81	3603.43	3503.81	2226.09	2359.29	2155.08	2858.15	2589.81	2637.51	31.06	32.3	29.45	40.02	35.72	36.05	2470.96	0.263211	0.0731979	3.59588	0.000323296	0.00877309
ENSG00000137628.16	DDX60	protein_coding	DExD/H-box helicase 60 [Source:HGNC Symbol;Acc:HGNC:25942]	4362.83	4359.42	4258.15	4057	4337.55	4225.84	3926.55	4534.09	4098.85	5674.88	5293.12	4583.84	46.55	52.76	47.59	67.54	62.05	53.24	4685.21	0.307912	0.0856886	3.59338	0.000326418	0.00883954
ENSG00000067066.16	SP100	protein_coding	SP100 nuclear antigen [Source:HGNC Symbol;Acc:HGNC:11206]	1607.95	1605.91	1636.05	1686.8	1594.52	1574.68	2131.19	2321.97	2011.4	2667.87	2721.48	2468.78	66.64	71.26	61.58	83.72	84.15	75.61	2387.11	0.281625	0.0784457	3.59007	0.000330591	0.00893413
ENSG00000111678.10	C12orf57	protein_coding	chromosome 12 open reading frame 57 [Source:HGNC Symbol;Acc:HGNC:29521]	402.409	391.862	399.725	400.13	394.16	393.374	829.95	735.639	745.696	955.975	974.306	983.21	105.7	91.95	93.07	122.19	122.71	122.71	870.793	0.333291	0.0928768	3.58853	0.000332552	0.00896866
ENSG00000117472.9	TSPAN1	protein_coding	tetraspanin 1 [Source:HGNC Symbol;Acc:HGNC:20657]	1059.19	1212.57	1073.04	1222.96	1217	1136.08	301.947	355.038	399.804	420.787	594.557	528.971	13.26	15.3	17.2	18.54	25.81	22.75	433.512	0.54399	0.15187	3.58195	0.000341035	0.0091786
ENSG00000106628.10	POLD2	protein_coding	DNA polymerase delta 2, accessory subunit [Source:HGNC Symbol;Acc:HGNC:9176]	1181.97	1159.26	1208.24	1181.71	1198.95	1205.5	3273.26	2909.04	3010.85	2527.65	2427.73	2687.01	139.19	121.41	125.37	107.89	102.08	111.92	2805.93	-0.265835	0.0743283	-3.5765	0.00034823	0.00931498
ENSG00000119917.13	IFIT3	protein_coding	interferon induced protein with tetratricopeptide repeats 3 [Source:HGNC Symbol;Acc:HGNC:5411]	2296.89	2292.19	2295.53	2295.27	2295.8	2296.23	3906.76	4798.03	3526.44	7403.54	7488.31	5311.05	86.07	103.74	76.07	163.72	163.12	114.62	5405.69	0.723892	0.202349	3.57745	0.000346968	0.00931498
ENSG00000145623.12	OSMR	protein_coding	oncostatin M receptor [Source:HGNC Symbol;Acc:HGNC:8507]	4273.3	4311.84	4451.14	4565.72	4336.37	4439.95	1743.9	1890.62	1802.03	2078.84	2374.6	2151.58	20.06	21.35	20.3	24.01	27.01	24.25	2006.93	0.279978	0.0782766	3.57677	0.000347863	0.00931498
ENSG00000054282.15	SDCCAG8	protein_coding	serologically defined colon cancer antigen 8 [Source:HGNC Symbol;Acc:HGNC:10671]	1302.68	1397.88	1337.22	1118.14	1135.07	1085.53	295.721	292.548	292.531	205.733	190.017	212.66	12.23	11.87	11.84	8.54	7.77	8.61	248.2	-0.529783	0.14817	-3.57551	0.000349548	0.00933122
ENSG00000132471.11	WBP2	protein_coding	WW domain binding protein 2 [Source:HGNC Symbol;Acc:HGNC:12738]	1574.69	1550.92	1597.6	1563.27	1565.02	1590.88	2292.03	1946.3	1865.92	2437.67	2531.6	2582.95	73.65	61.38	58.71	78.64	80.43	81.3	2276.07	0.307123	0.0859299	3.57411	0.000351419	0.0093432
ENSG00000166681.13	BEX3	protein_coding	brain expressed X-linked 3 [Source:HGNC Symbol;Acc:HGNC:13388]	725.089	717.085	721.568	715.414	717.645	715.451	3332.44	3229.53	3075	4061.37	3906.78	3560.1	234.47	223.01	211.85	286.84	271.8	245.37	3527.53	0.257804	0.0721303	3.57415	0.000351373	0.0093432
ENSG00000135269.17	TES	protein_coding	testin LIM domain protein [Source:HGNC Symbol;Acc:HGNC:14620]	2084.93	1986.15	2027.97	2094.89	1947.07	2111.76	527.931	667.218	618.664	457.467	464.128	419.225	13.08	16.23	15.01	11.38	11.37	10.17	525.787	-0.437114	0.122338	-3.57299	0.000352923	0.00936423
ENSG00000119408.16	NEK6	protein_coding	NIMA related kinase 6 [Source:HGNC Symbol;Acc:HGNC:7749]	2477.9	2632.99	2541.13	2527.96	2484.52	2711.12	987.562	985.314	997.551	803.319	815.68	779.348	19.5	19.09	19.28	15.91	15.92	15.07	894.81	-0.310732	0.0870566	-3.56932	0.000357914	0.00947751
ENSG00000272068.1	AL365181.2	lincRNA		3043.54	3036.37	3039.72	3040.74	3040.2	3039.97	120.196	133.859	108.237	192.269	187.039	191.951	2	2.19	1.76	3.21	3.08	3.13	155.591	0.662596	0.185898	3.56431	0.000364821	0.00964097
ENSG00000169926.10	KLF13	protein_coding	Kruppel like factor 13 [Source:HGNC Symbol;Acc:HGNC:13672]	2952.12	3845.15	3563.83	4062.28	3577.94	4439.16	361.633	224.139	260.629	184.493	191.19	143.373	4.92	2.99	3.48	2.52	2.58	1.91	227.557	-0.711848	0.199761	-3.5635	0.000365947	0.00965131
ENSG00000146918.19	NCAPG2	protein_coding	non-SMC condensin II complex subunit G2 [Source:HGNC Symbol;Acc:HGNC:21904]	3680.75	3663.18	3731.66	3658.54	3662.4	3669.03	4517.97	4450.8	4528.29	4091.84	3706.35	3676.64	62.12	60.07	60.97	56.48	50.39	49.52	4161.99	-0.234423	0.0658097	-3.56213	0.000367861	0.00968234
ENSG00000166908.17	PIP4K2C	protein_coding	phosphatidylinositol-5-phosphate 4-kinase type 2 gamma [Source:HGNC Symbol;Acc:HGNC:23786]	2505.12	2344	2420.97	2407.12	2409.2	2471.7	3118.08	3414.48	3456.84	3841.41	3960.45	3969.61	64.99	69.86	70.55	80.39	81.63	81.06	3626.81	0.237112	0.0666854	3.55569	0.000376989	0.00990275
ENSG00000112699.10	GMDS	protein_coding	GDP-mannose 4,6-dehydratase [Source:HGNC Symbol;Acc:HGNC:4369]	1172.43	1081.77	1117.78	1179.15	1051.48	1260.44	660.819	715.116	717.288	524.309	580.097	514.957	29.26	31.09	31.11	23.31	25.4	22.34	618.775	-0.374764	0.105525	-3.55141	0.000383167	0.00996537
ENSG00000116830.11	TTF2	protein_coding	transcription termination factor 2 [Source:HGNC Symbol;Acc:HGNC:12398]	2033.64	1949.83	1894.87	2059.68	2134.38	2011.25	2922.39	3052.16	3009.52	2705.17	2231.82	2450.2	73.44	75.26	74.03	68.21	55.45	60.32	2728.54	-0.281469	0.0792211	-3.55295	0.000380932	0.00996537
ENSG00000119899.12	SLC17A5	protein_coding	solute carrier family 17 member 5 [Source:HGNC Symbol;Acc:HGNC:10933]	3276.54	3269.37	3272.72	3273.74	2860.27	2926.66	278.434	264.531	264.052	346.374	393.105	383.98	4.48	4.18	4.16	5.6	6.26	6.05	321.743	0.4751	0.133746	3.55226	0.000381935	0.00996537
ENSG00000130518.16	KIAA1683	protein_coding	KIAA1683 [Source:HGNC Symbol;Acc:HGNC:29350]	4700.9	4993.2	4702.35	4951.61	4871.51	4913.91	238.236	208.178	247.316	346.51	293.651	366.313	2.49	2.13	2.52	3.62	3.02	3.74	283.351	0.538097	0.151508	3.55161	0.000382881	0.00996537
ENSG00000173674.10	EIF1AX	protein_coding	eukaryotic translation initiation factor 1A, X-linked [Source:HGNC Symbol;Acc:HGNC:3250]	2164.44	2265.85	2326.86	2411.63	2476.45	2429.96	3754.66	4036.82	4169.21	3521.29	3281.44	3306.71	81.02	85.51	88.1	76.28	70.02	69.9	3678.37	-0.242864	0.0683509	-3.55319	0.000380588	0.00996537
ENSG00000100284.20	TOM1	protein_coding	target of myb1 membrane trafficking protein [Source:HGNC Symbol;Acc:HGNC:11982]	2051.11	2161.13	1976.28	1967.79	2031.3	1926.08	501.041	485.5	490.851	582.707	661.589	695.576	12.56	11.95	12.05	14.67	16.4	17.08	569.544	0.394026	0.110986	3.55022	0.000384906	0.00999082
ENSG00000137331.11	IER3	protein_coding	immediate early response 3 [Source:HGNC Symbol;Acc:HGNC:5392]	1070.47	1061.68	1064.53	1065.85	1065.45	1065.84	7578.23	8074.29	7173.3	8516.82	10248.9	8881.6	359.62	376.03	333.3	405.67	480.92	412.84	8412.19	0.276176	0.0778035	3.54966	0.00038573	0.00999246
ENSG00000141556.20	TBCD	protein_coding	tubulin folding cofactor D [Source:HGNC Symbol;Acc:HGNC:11581]	2328.73	2377.82	2491.92	2517.76	2504.15	2449.66	2091.84	1784.08	1758.24	1523.65	1402.63	1581.71	43.26	36.23	35.61	31.66	28.69	32.07	1690.33	-0.319901	0.0901872	-3.54708	0.000389527	0.010071
ENSG00000113763.10	UNC5A	protein_coding	unc-5 netrin receptor A [Source:HGNC Symbol;Acc:HGNC:12567]	3633.54	3411.4	3408.8	3630.74	3630.2	3629.97	135.469	155.892	153.398	83.1245	94.9036	87.2122	1.93	2.18	2.14	1.19	1.33	1.21	118.341	-0.748215	0.211037	-3.54542	0.000391989	0.0101147
ENSG00000231500.6	RPS18	protein_coding	ribosomal protein S18 [Source:HGNC Symbol;Acc:HGNC:10401]	435.766	429.129	431.832	433.104	432.559	432.372	42098	44778.7	45483.3	37900.2	38885.4	39153.4	4922.5	5138.78	5207.61	4448.5	4495.87	4484.68	41383.3	-0.19117	0.0540251	-3.53855	0.000402335	0.0103613
ENSG00000100075.9	SLC25A1	protein_coding	solute carrier family 25 member 1 [Source:HGNC Symbol;Acc:HGNC:10979]	1403.78	1376.73	1400.63	1410.78	1401.26	1401.37	2785.36	2460.49	2445.91	3046.06	2978.6	3235.63	100.67	87.28	86.57	110.51	106.46	114.56	2825.33	0.26819	0.0758199	3.53719	0.000404404	0.0103942
ENSG00000003400.14	CASP10	protein_coding	caspase 10 [Source:HGNC Symbol;Acc:HGNC:1500]	3563.49	3678.26	3115.18	4429.61	3595.03	3883.47	179.889	175.049	171.259	229.124	323.217	255.346	2.46	2.36	2.29	3.15	4.38	3.43	222.353	0.612302	0.173341	3.53236	0.000411873	0.0104982
ENSG00000077157.21	PPP1R12B	protein_coding	protein phosphatase 1 regulatory subunit 12B [Source:HGNC Symbol;Acc:HGNC:7619]	7158.01	7328.22	6899.44	7560.01	9183.51	7588.37	1840.18	1691.4	1823.19	1521.25	1213.93	1506.61	12.26	11.06	11.9	10.17	8.01	9.83	1599.36	-0.335948	0.0950901	-3.53295	0.000410958	0.0104982
ENSG00000102226.9	USP11	protein_coding	ubiquitin specific peptidase 11 [Source:HGNC Symbol;Acc:HGNC:12609]	2361.92	2450.7	2408.65	2444.06	2480.61	2513.93	2515.28	2108.53	2159.16	2741.44	2827.87	2700.09	52.06	42.83	43.76	56.96	57.88	54.74	2508.72	0.284931	0.0806949	3.53097	0.000414043	0.0104982
ENSG00000136997.17	MYC	protein_coding	MYC proto-oncogene, bHLH transcription factor [Source:HGNC Symbol;Acc:HGNC:7553]	1908.77	1893.41	1845.56	1863.57	1821.99	1810.5	4280.4	3940.31	4115.47	3374.36	3457.49	3656.73	116.56	105.3	109.74	92.24	93.1	97.55	3804.12	-0.233797	0.0661881	-3.53231	0.000411941	0.0104982
ENSG00000137804.12	NUSAP1	protein_coding	nucleolar and spindle associated protein 1 [Source:HGNC Symbol;Acc:HGNC:18538]	1642.14	1719.5	1656.15	1634.21	1641.02	1580.63	2889.57	2902.92	2918.14	2628.09	2351.31	2332.67	88.82	87.57	87.83	81.09	71.47	70.24	2670.46	-0.252648	0.0715416	-3.53148	0.000413246	0.0104982
ENSG00000172340.14	SUCLG2	protein_coding	succinate-CoA ligase GDP-forming beta subunit [Source:HGNC Symbol;Acc:HGNC:11450]	2160.68	2138.84	2153.66	2152.66	2165.39	2152.07	2346.75	2369.79	2657.11	2098.32	1956.87	2055.91	55.09	54.61	61.09	49.44	45.41	47.29	2247.46	-0.271043	0.0767123	-3.53324	0.000410503	0.0104982
ENSG00000185883.11	ATP6V0C	protein_coding	ATPase H+ transporting V0 subunit c [Source:HGNC Symbol;Acc:HGNC:855]	995.829	989.044	990.157	992.945	988.22	990.838	3604.78	2879.48	2843.16	3741.72	3990.96	3890.81	183.89	144.17	142.04	191.62	201.33	194.45	3491.81	0.316969	0.0897524	3.53159	0.000413071	0.0104982
ENSG00000068971.13	PPP2R5B	protein_coding	protein phosphatase 2 regulatory subunit B'beta [Source:HGNC Symbol;Acc:HGNC:9310]	2492.16	2479.15	2502.11	2538.62	1955.73	2474.51	167.117	197.227	191.569	257.72	351.371	250.864	3.52	4.08	3.95	5.46	7.33	5.18	235.988	0.618415	0.175234	3.52907	0.000417022	0.0105533
ENSG00000140464.19	PML	protein_coding	promyelocytic leukemia [Source:HGNC Symbol;Acc:HGNC:9113]	2776.74	2685.17	2651.36	2701.95	2697.39	2760.83	2459.13	2192.45	2069.4	2856.44	2862.71	2546.5	45.85	40.14	37.78	53.48	52.79	46.51	2497.78	0.297229	0.0842582	3.5276	0.000419347	0.0105917
ENSG00000145545.11	SRD5A1	protein_coding	steroid 5 alpha-reductase 1 [Source:HGNC Symbol;Acc:HGNC:11284]	2337.39	2447.75	2381.64	2353.02	2579.04	2548.94	816.803	806.245	855.519	705.066	616.06	623.026	16.94	16.41	17.36	14.67	12.63	12.65	737.128	-0.352092	0.0998611	-3.52582	0.000422181	0.0106429
ENSG00000125775.14	SDCBP2	protein_coding	syndecan binding protein 2 [Source:HGNC Symbol;Acc:HGNC:15756]	1350.76	1333.37	1296.11	1077.32	1347.03	1320.64	24.0744	38.1766	24.5458	47.3643	69.246	92.8868	0.95	1.48	0.95	1.87	2.67	3.58	49.3762	1.29612	0.36792	3.52283	0.000426958	0.0107427
ENSG00000171940.13	ZNF217	protein_coding	zinc finger protein 217 [Source:HGNC Symbol;Acc:HGNC:13009]	4930.52	4898.98	4935.71	5013.89	4971.15	5066.9	13858.3	14527.7	14167.9	12860.4	12352.3	11736.7	141.03	145.09	141.18	131.37	124.29	116.99	13250.6	-0.203989	0.057915	-3.52222	0.000427952	0.0107471
ENSG00000150456.10	EEF1AKMT1	protein_coding	EEF1A lysine methyltransferase 1 [Source:HGNC Symbol;Acc:HGNC:27351]	729.714	700.404	745.318	747.948	755.601	719.796	257.158	316.542	295.697	205.28	197.085	192.107	17.74	21.43	19.98	14.22	13.44	12.99	243.978	-0.546886	0.155571	-3.51534	0.000439184	0.0110081
ENSG00000090615.14	GOLGA3	protein_coding	golgin A3 [Source:HGNC Symbol;Acc:HGNC:4426]	6422.46	6915.93	5687.66	6069.06	5897.49	6026.76	2928.36	2725.59	3282.29	3497.76	3623.34	3678.37	24.05	21.97	26.39	28.83	29.42	29.58	3289.23	0.272804	0.0776331	3.51401	0.000441389	0.0110423
ENSG00000132436.11	FIGNL1	protein_coding	fidgetin like 1 [Source:HGNC Symbol;Acc:HGNC:13286]	2846.2	2935.84	2839.18	2989.81	2958.4	3005.08	1373.04	1322.24	1515.86	1185.91	1130.86	1096.79	23.71	22.41	25.64	20.56	19.31	18.56	1270.79	-0.304731	0.0867469	-3.51288	0.000443282	0.0110476
ENSG00000133816.13	MICAL2	protein_coding	microtubule associated monooxygenase, calponin and LIM domain containing 2 [Source:HGNC Symbol;Acc:HGNC:24693]	4184.37	4915.02	3707.33	4680	5095.46	4269	1254.6	1192.93	1527	906.056	962.412	1138.25	14.26	13.3	16.98	10.34	10.81	12.67	1163.51	-0.400866	0.114112	-3.51292	0.000443203	0.0110476
ENSG00000124302.12	CHST8	protein_coding	carbohydrate sulfotransferase 8 [Source:HGNC Symbol;Acc:HGNC:15993]	1885.32	1947.37	1974.65	1951.74	1968.25	1959.76	111.224	113.315	127.114	48.244	79.8927	61.6908	2.89	2.89	3.23	1.26	2.05	1.57	90.2497	-0.901743	0.25683	-3.51104	0.000446351	0.011103
ENSG00000102755.11	FLT1	protein_coding	fms related tyrosine kinase 1 [Source:HGNC Symbol;Acc:HGNC:3763]	4763.97	4352.58	4056.24	5977.49	5158.74	4971.76	83.6896	104.624	100.6	42.6476	59.3684	46.937	0.87	1.07	1.03	0.45	0.61	0.48	72.9245	-0.961638	0.274069	-3.50874	0.000450228	0.0111782
ENSG00000185697.16	MYBL1	protein_coding	MYB proto-oncogene like 1 [Source:HGNC Symbol;Acc:HGNC:7547]	3669.58	3616.06	3601.16	3655.14	3378.93	3539.2	982.004	1036.22	983.427	858.579	788.817	735.175	13.88	14.39	13.62	12.19	11.04	10.19	897.356	-0.333369	0.0951054	-3.50525	0.000456171	0.0113044
ENSG00000122406.12	RPL5	protein_coding	ribosomal protein L5 [Source:HGNC Symbol;Acc:HGNC:10360]	865.001	857.96	861.152	861.965	861.727	861.54	13740.7	15493.9	15666.7	12802.4	12646.6	12984.6	806.48	892.48	900.4	754.27	733.94	746.54	13889.2	-0.224332	0.0640365	-3.50319	0.000459717	0.0113709
ENSG00000163512.13	AZI2	protein_coding	5-azacytidine induced 2 [Source:HGNC Symbol;Acc:HGNC:24002]	894.289	1093.65	1143.91	940.62	983.822	876.761	1595.8	1413.92	1320.38	1782.5	1717.35	1848.02	82	71.31	66.44	91.98	87.24	93	1612.98	0.306513	0.0875311	3.50176	0.00046219	0.0113711
ENSG00000215784.5	FAM72D	protein_coding	family with sequence similarity 72 member D [Source:HGNC Symbol;Acc:HGNC:33593]	2218.54	2211.37	2214.72	2215.74	2215.2	2214.97	554.654	516.385	564.345	442.505	387.528	405.144	12.66	11.56	12.61	10.14	8.74	9.06	478.429	-0.405182	0.115711	-3.50169	0.000462326	0.0113711
ENSG00000221866.9	PLXNA4	protein_coding	plexin A4 [Source:HGNC Symbol;Acc:HGNC:9102]	9985.8	11367.7	11853.8	10152.3	11310.3	11074	174.396	148.243	167.684	61.339	91.0816	117.769	0.8	0.67	0.76	0.28	0.42	0.53	126.763	-0.848572	0.242282	-3.50241	0.000461073	0.0113711
ENSG00000145901.14	TNIP1	protein_coding	TNFAIP3 interacting protein 1 [Source:HGNC Symbol;Acc:HGNC:16903]	2436.76	2465.62	2505.94	2464.98	2475.05	2479.01	2570.89	2643.55	2529.53	2883.24	3177.44	3074.37	52.6	53.1	50.68	59.23	64.29	61.62	2813.17	0.238359	0.0680806	3.50112	0.000463301	0.0113738
ENSG00000156127.6	BATF	protein_coding	basic leucine zipper ATF-like transcription factor [Source:HGNC Symbol;Acc:HGNC:958]	801.54	794.37	797.72	798.74	798.2	797.97	570.242	541.835	595.092	666.63	769.603	779.322	36.13	33.69	36.92	42.4	48.22	48.37	653.783	0.374812	0.107211	3.49601	0.000472278	0.0115726
ENSG00000131626.16	PPFIA1	protein_coding	PTPRF interacting protein alpha 1 [Source:HGNC Symbol;Acc:HGNC:9245]	3883.07	3892.12	3755.8	3809.22	4064.47	3757.19	4954.13	5085.32	5131.06	4467.73	4269.69	4426.8	64.93	65.4	65.84	58.77	55.31	56.83	4722.47	-0.204435	0.0585018	-3.4945	0.000474942	0.0116162
ENSG00000172893.15	DHCR7	protein_coding	7-dehydrocholesterol reductase [Source:HGNC Symbol;Acc:HGNC:2860]	2079.83	2139.67	2092.83	1991.99	2076.26	2034.53	4892.74	3985.1	4539.46	5469.21	5089.4	5843.27	119.61	95.61	108.66	134.2	123.02	139.93	4969.85	0.289867	0.0829654	3.49383	0.000476139	0.0116238
ENSG00000164104.11	HMGB2	protein_coding	high mobility group box 2 [Source:HGNC Symbol;Acc:HGNC:5000]	976.154	955.649	954.702	958.897	971.966	967.304	5769.72	5391.53	5560.27	5164.24	4324.52	4420.32	302.62	277.55	285.57	271.9	224.29	227.12	5105.11	-0.265806	0.0763342	-3.48214	0.000497422	0.0121137
ENSG00000237550.5	RPL9P9	transcribed_processed_pseudogene	ribosomal protein L9 pseudogene 9 [Source:HGNC Symbol;Acc:HGNC:17251]	403.151	396.628	400.02	400.868	400.215	399.765	7135.72	8178.84	8381.25	6463.86	6819.2	6679.55	901.84	1014.58	1037.24	820.06	852.26	826.99	7276.43	-0.247491	0.0710814	-3.4818	0.000498049	0.0121137
ENSG00000148057.15	IDNK	protein_coding	IDNK, gluconokinase [Source:HGNC Symbol;Acc:HGNC:31367]	804.297	802.063	879.164	755.702	724.496	719.207	106.896	118.833	120.037	182.714	196.754	168.071	6.93	7.57	7.63	11.91	12.64	10.69	148.895	0.65924	0.189394	3.48078	0.000499948	0.0121374
ENSG00000174567.7	GOLT1A	protein_coding	golgi transport 1A [Source:HGNC Symbol;Acc:HGNC:24766]	667.106	643.655	675.746	649.723	671.65	668.121	154.558	172.611	159.573	264.036	220.355	240.565	11.8	12.93	11.93	20.23	16.63	17.99	201.951	0.579196	0.16643	3.48012	0.000501192	0.0121451
ENSG00000042445.13	RETSAT	protein_coding	retinol saturase [Source:HGNC Symbol;Acc:HGNC:25991]	2288.27	2461.67	2494.08	2444.29	2395.95	2564.79	659.882	597.453	594.041	726.06	838.677	818.221	13.67	12.16	12.06	15.1	17.19	16.61	705.706	0.363248	0.104456	3.47753	0.000506061	0.0122405
ENSG00000155893.12	PXYLP1	protein_coding	2-phosphoxylose phosphatase 1 [Source:HGNC Symbol;Acc:HGNC:26303]	2286.14	2014.52	2211.96	1597.25	1902.85	1692.8	107.949	144.706	97.5397	75.4702	58.8258	46.6705	2.82	3.71	2.5	1.97	1.53	1.19	88.5268	-0.958879	0.275894	-3.47553	0.000509844	0.0123094
ENSG00000120885.21	CLU	protein_coding	clusterin [Source:HGNC Symbol;Acc:HGNC:2095]	710.072	635.5	645.76	678.345	634.191	694.524	3219.2	4553.06	4431.41	5439.65	7952.95	7192.04	244.53	339.42	329.6	414.75	597.31	535.14	5464.65	0.754178	0.21713	3.47339	0.000513933	0.0123853
ENSG00000121858.10	TNFSF10	protein_coding	TNF superfamily member 10 [Source:HGNC Symbol;Acc:HGNC:11925]	1644.94	1708	1640.06	1553.51	1680.94	1743.77	422.018	549.735	417.446	820.054	712.612	516.528	12.85	16.43	12.45	25.06	21.45	15.4	573.043	0.558816	0.161041	3.47002	0.000520411	0.0125173
ENSG00000134508.12	CABLES1	protein_coding	Cdk5 and Abl enzyme substrate 1 [Source:HGNC Symbol;Acc:HGNC:25097]	2325	2408.18	2654.79	2568.92	2252.79	2765.9	777.853	724.951	684.002	549.676	605.176	546.175	15.8	14.45	13.6	11.21	12.14	10.87	647.971	-0.365742	0.105424	-3.46925	0.000521917	0.0125173
ENSG00000256594.8	AC010186.2	transcribed_unprocessed_pseudogene		1460.07	1468.61	1674.65	1238.56	1449.65	1391.76	150.962	172.378	139.383	232.577	220.789	241.108	5.3	5.95	4.8	8.2	7.67	8.27	192.844	0.592296	0.170737	3.46907	0.00052227	0.0125173
ENSG00000053747.15	LAMA3	protein_coding	laminin subunit alpha 3 [Source:HGNC Symbol;Acc:HGNC:6483]	4731.29	5095.24	5437.09	5117.52	5228.06	4801.28	1179.17	1223.7	1005.4	843.892	854.817	957.703	11.78	11.99	9.83	8.46	8.44	9.38	1010.78	-0.355525	0.102515	-3.46804	0.000524273	0.0125263
ENSG00000105287.12	PRKD2	protein_coding	protein kinase D2 [Source:HGNC Symbol;Acc:HGNC:17293]	1905.54	1810.47	1991.91	1854.11	1855.09	2050.75	1958.3	1693.28	1577.56	2227.26	2304.81	2012.32	51.86	44.01	40.9	59.22	60.36	52.2	1962.27	0.322396	0.092966	3.46789	0.000524554	0.0125263
ENSG00000100983.9	GSS	protein_coding	glutathione synthetase [Source:HGNC Symbol;Acc:HGNC:4624]	1743.54	1736.37	1739.72	1739.04	1740.2	1739.97	1093.31	1058.05	1123.6	1339.24	1299.6	1327.96	31.78	30.18	31.98	39.07	37.35	37.81	1206.95	0.275959	0.0795912	3.46721	0.000525888	0.0125354
ENSG00000166888.11	STAT6	protein_coding	signal transducer and activator of transcription 6 [Source:HGNC Symbol;Acc:HGNC:11368]	2904.13	2848.13	3016.82	2886.13	3043.43	2925.79	1189.32	1120.3	919.156	1436.38	1450.32	1274.77	20.49	18.93	15.5	24.82	24.7	21.5	1231.7	0.365708	0.105499	3.46645	0.000527373	0.012548
ENSG00000067064.10	IDI1	protein_coding	isopentenyl-diphosphate delta isomerase 1 [Source:HGNC Symbol;Acc:HGNC:5387]	1901.07	1907	1923.99	1934.23	1882.46	1959.59	2999.33	3012.79	3424.2	4021.45	3560.43	3776.36	79.08	77.95	88.4	106.43	92.82	97.54	3465.56	0.267469	0.0772353	3.46304	0.000534105	0.0126689
ENSG00000100612.13	DHRS7	protein_coding	dehydrogenase/reductase 7 [Source:HGNC Symbol;Acc:HGNC:21524]	1089.98	1097.17	1100.72	1079.43	1085.77	1080.81	1235.63	1334.81	1260.28	1571.55	1601.96	1470.58	57.36	60.82	57.29	73.24	73.54	66.88	1412.47	0.277122	0.080028	3.46282	0.000534548	0.0126689
ENSG00000261716.1	AC239868.2	sense_overlapping		4348.54	4341.37	4344.72	4345.74	4345.2	4344.97	2346.88	2399.5	2284.46	2743.49	2810.99	2681.56	27.32	27.41	26.03	32.04	32.35	30.57	2544.48	0.227946	0.0658344	3.46242	0.000535345	0.0126689
ENSG00000144401.14	METTL21A	protein_coding	methyltransferase like 21A [Source:HGNC Symbol;Acc:HGNC:30476]	1086.87	1007.11	1054.1	1059.49	1082.39	1112.59	338.275	350.372	339.38	275.793	230.723	218.458	16.03	16.33	15.76	13.13	10.82	10.15	292.177	-0.505757	0.146103	-3.46165	0.000536873	0.0126822
ENSG00000115657.12	ABCB6	protein_coding	ATP binding cassette subfamily B member 6 (Langereis blood group) [Source:HGNC Symbol;Acc:HGNC:47]	1640.08	1639.12	1533.05	1692.9	1572.21	1563.6	886.778	869.161	890.487	997.74	1158.69	1152.61	27.91	26.87	27.44	31.55	36.06	35.56	992.573	0.321314	0.0928495	3.46059	0.000538996	0.0127095
ENSG00000108846.15	ABCC3	protein_coding	ATP binding cassette subfamily C member 3 [Source:HGNC Symbol;Acc:HGNC:54]	3950.76	3568.52	3486.27	3426.88	3126.89	3756.18	570.409	556.841	672.52	694.242	815.745	898.334	8.15	7.8	9.4	9.95	11.52	12.56	701.354	0.421284	0.121841	3.45766	0.000544881	0.0128252
ENSG00000081803.15	CADPS2	protein_coding	calcium dependent secretion activator 2 [Source:HGNC Symbol;Acc:HGNC:16018]	3662.78	3200.99	3574.91	3520.31	3300.23	3650.03	655.096	715.738	683.653	602.255	472.566	442.372	9.52	10.2	9.73	8.78	6.79	6.29	595.286	-0.437841	0.126661	-3.4568	0.000546628	0.0128433
ENSG00000197081.12	IGF2R	protein_coding	insulin like growth factor 2 receptor [Source:HGNC Symbol;Acc:HGNC:5467]	11654.6	10483.7	10296.6	11192.1	10107.6	11412.8	4252.14	4897.82	4707.01	5246.42	6059.49	5374.85	19.84	22.42	21.5	24.57	27.94	24.55	5089.54	0.266733	0.0773121	3.45009	0.000560404	0.0131405
ENSG00000197275.13	RAD54B	protein_coding	RAD54 homolog B (S. cerevisiae) [Source:HGNC Symbol;Acc:HGNC:17228]	2451.82	2263.83	2592.41	2550.22	2180.62	2089.36	877.377	1060.75	964.129	725.773	744.474	800.098	18.89	22.42	20.34	15.69	15.87	16.89	862.103	-0.351094	0.101776	-3.44967	0.000561277	0.0131405
ENSG00000168101.14	NUDT16L1	protein_coding	nudix hydrolase 16 like 1 [Source:HGNC Symbol;Acc:HGNC:28154]	1192.03	1181.2	1176.71	1186.31	1181.93	1179.01	1318.86	1233.3	1307.96	1418.31	1687.42	1679.03	56.38	51.74	54.75	60.86	71.33	70.32	1440.81	0.308964	0.0896234	3.44736	0.000566091	0.0132296
ENSG00000140905.10	GCSH	protein_coding	glycine cleavage system protein H [Source:HGNC Symbol;Acc:HGNC:4208]	1090.14	1012.23	1024.02	1055.84	1004.79	1060.27	2184.53	2538.47	2486.23	1967.69	2076.83	1907.41	106.13	121.04	118.29	95.95	99.79	90.78	2193.54	-0.277263	0.0804403	-3.44682	0.000567233	0.0132328
ENSG00000178719.16	GRINA	protein_coding	glutamate ionotropic receptor NMDA type subunit associated protein 1 [Source:HGNC Symbol;Acc:HGNC:4589]	1232.78	1198.42	1212.16	1219.91	1215.07	1270.19	9666.55	8572.8	7948.49	10323.9	10611.9	10261	399.18	347.44	321.39	427.94	433.31	415.07	9564.1	0.252324	0.0732756	3.44349	0.000574268	0.0133731
ENSG00000239264.8	TXNDC5	protein_coding	thioredoxin domain containing 5 [Source:HGNC Symbol;Acc:HGNC:21073]	2780.08	2776.84	2777.03	2764.22	2763.6	2775.76	6316.05	6442.23	6663.63	5600.98	5531.71	5789.11	115.18	115.3	118.98	102.53	99.75	103.42	6057.29	-0.19857	0.0577732	-3.43705	0.000588085	0.0136706
ENSG00000087586.17	AURKA	protein_coding	aurora kinase A [Source:HGNC Symbol;Acc:HGNC:11393]	1700.91	1692.69	1696.46	1692.24	1675.72	1717.52	4253.3	4059.27	4358.84	3768.33	3621.13	3472.74	126.82	118.79	127.27	112.8	106.77	101.44	3922.27	-0.223199	0.0649944	-3.43412	0.000594482	0.0137453
ENSG00000095585.16	BLNK	protein_coding	B-cell linker [Source:HGNC Symbol;Acc:HGNC:14211]	1277.2	1318.57	1423.73	1352.65	1354.28	1531.39	68.1288	73.1953	61.3872	113.49	116.039	123.842	2.51	2.65	2.21	4.19	4.22	4.46	92.6753	0.808921	0.235587	3.43363	0.000595551	0.0137453
ENSG00000145743.15	FBXL17	protein_coding	F-box and leucine rich repeat protein 17 [Source:HGNC Symbol;Acc:HGNC:13615]	3259.92	3297.69	3184.13	3840.24	3401.29	3080.94	834.122	920.282	993.539	622.441	636.089	806.489	12.64	13.69	14.75	9.47	9.54	11.98	802.158	-0.409614	0.11931	-3.43319	0.000596529	0.0137453
ENSG00000185624.14	P4HB	protein_coding	prolyl 4-hydroxylase subunit beta [Source:HGNC Symbol;Acc:HGNC:8548]	1896.35	1779.19	1824.8	1842.67	1833.78	1865	21235.9	21462	22606.6	23751	25317.2	25882.5	583.62	578.9	608.35	655.23	687.99	696.8	23375.8	0.198667	0.057835	3.43505	0.000592435	0.0137453
ENSG00000257379.1	AC023509.1	processed_transcript		1392.54	1385.37	1388.72	1389.74	1389.2	1388.97	195.845	154.503	200.804	250.208	266.417	311.22	7.12	5.52	7.16	9.14	9.61	11.09	229.83	0.585303	0.170437	3.43412	0.000594472	0.0137453
ENSG00000110080.18	ST3GAL4	protein_coding	ST3 beta-galactoside alpha-2,3-sialyltransferase 4 [Source:HGNC Symbol;Acc:HGNC:10864]	1363.65	1285.22	1475.46	1305.2	1272.44	1391.93	692.711	720.886	612.496	808.391	859.086	922.534	26	26.56	22.51	30.45	31.89	33.93	769.352	0.358762	0.10453	3.43216	0.0005988	0.0137735
ENSG00000151882.11	CCL28	protein_coding	C-C motif chemokine ligand 28 [Source:HGNC Symbol;Acc:HGNC:17700]	2098.39	2223.67	2029.56	2050.48	2286.61	2140.87	437.525	469.144	446.101	616.751	519.227	663.445	10.36	10.9	10.34	14.65	12.15	15.38	525.367	0.416324	0.12137	3.43021	0.000603121	0.0138486
ENSG00000204516.9	MICB	protein_coding	MHC class I polypeptide-related sequence B [Source:HGNC Symbol;Acc:HGNC:7091]	2149.89	2204.06	2158.34	2114.21	2121.66	2177.74	892.926	872.568	913.558	1065.07	1191.35	1063.21	20.95	20.11	21	25.09	27.64	24.45	999.773	0.306086	0.089359	3.42536	0.000613994	0.0140736
ENSG00000140479.16	PCSK6	protein_coding	proprotein convertase subtilisin/kexin type 6 [Source:HGNC Symbol;Acc:HGNC:8569]	3040.46	2974.11	2996.59	3095.29	3053.56	3221.03	922.237	967.167	1014	727.066	716.623	841.803	15.22	15.68	16.39	12.05	11.71	13.6	864.814	-0.341837	0.0998396	-3.42386	0.000617378	0.0141265
ENSG00000185650.9	ZFP36L1	protein_coding	ZFP36 ring finger protein like 1 [Source:HGNC Symbol;Acc:HGNC:1107]	2834.21	2995.57	2994.15	3005.1	2989.77	2826.16	5063.88	4866.79	4659.13	4125.17	4133.51	4313.49	87.1	82.16	78.48	71.23	70.3	72.68	4527.01	-0.214249	0.0625878	-3.42318	0.000618932	0.0141375
ENSG00000235174.1	AC019205.3	processed_pseudogene		9.05	7.9	8.29	8.59	8.22	8.46	563.379	641.744	705.754	462.863	497.063	486.414	3385.78	3786.95	4154.55	2791.43	2956.56	2862.14	559.537	-0.402431	0.117859	-3.41451	0.000638977	0.01457
ENSG00000108559.11	NUP88	protein_coding	nucleoporin 88 [Source:HGNC Symbol;Acc:HGNC:8067]	1044.26	1019.06	1024.62	1040.19	1118.57	1081.49	1764.51	1678.31	1829.04	1534.06	1379.73	1461.67	84.63	79.02	85.9	73.85	65.45	68.68	1607.89	-0.269121	0.0789452	-3.40897	0.000652092	0.0148433
ENSG00000105520.10	PLPPR2	protein_coding	phospholipid phosphatase related 2 [Source:HGNC Symbol;Acc:HGNC:29566]	2208.81	2238.81	2276.44	2231.89	2174.16	2234.48	1355.67	1181.24	1166.34	1420.54	1607.32	1559.86	30.78	26.32	25.93	32.38	36.08	34.69	1381.82	0.308322	0.0906078	3.40282	0.000666941	0.015155
ENSG00000120690.15	ELF1	protein_coding	E74 like ETS transcription factor 1 [Source:HGNC Symbol;Acc:HGNC:3316]	2430.17	2690.07	2613.76	2485.55	2630.9	2453.03	5177.07	5228.82	5233.77	6232.01	5907.91	5814.81	102.72	101.82	101.67	124.12	115.9	113.02	5599.05	0.19886	0.0584551	3.40192	0.000669134	0.0151763
ENSG00000159403.15	C1R	protein_coding	complement C1r [Source:HGNC Symbol;Acc:HGNC:1246]	2498.81	1962.4	1843.12	2104.24	1870.8	1934.92	131.208	126.235	137.928	220.162	216.971	176.043	3.28	3.11	3.38	5.52	5.36	4.31	168.085	0.626264	0.184114	3.40149	0.000670186	0.0151763
ENSG00000088002.11	SULT2B1	protein_coding	sulfotransferase family 2B member 1 [Source:HGNC Symbol;Acc:HGNC:11459]	1119.91	1111.3	1114.92	1117.48	1115.43	1116.38	1519.96	1364.1	1449.49	1676.85	1754.11	1779.81	68.88	60.67	64.31	76.27	78.6	79	1590.71	0.265129	0.0780486	3.39697	0.000681365	0.01535
ENSG00000108784.9	NAGLU	protein_coding	N-acetyl-alpha-glucosaminidase [Source:HGNC Symbol;Acc:HGNC:7632]	2101.33	1868.08	2074.41	2122.36	1988.95	2131.22	1055.12	996.234	948.242	1187.69	1327.2	1193.95	26.09	24.17	22.96	29.47	32.43	28.91	1118.06	0.30383	0.0894197	3.39779	0.000679319	0.01535
ENSG00000131153.8	GINS2	protein_coding	GINS complex subunit 2 [Source:HGNC Symbol;Acc:HGNC:24575]	2368.3	2454.53	2490.72	2491.74	2421.17	2425.76	1835.71	1779.63	1824.62	1478.08	1585.02	1520.12	38.02	36.17	37	30.73	32.46	30.84	1670.53	-0.248578	0.0731688	-3.39732	0.00068049	0.01535
ENSG00000118369.12	USP35	protein_coding	ubiquitin specific peptidase 35 [Source:HGNC Symbol;Acc:HGNC:20061]	2750.4	3004.11	3372.81	2809.42	2721.44	3447.26	320.144	293.415	234.702	426.158	454.485	348.733	5.38	4.85	3.87	7.2	7.56	5.75	346.256	0.533003	0.157484	3.3845	0.000713092	0.0160372
ENSG00000037042.8	TUBG2	protein_coding	tubulin gamma 2 [Source:HGNC Symbol;Acc:HGNC:12419]	1388.67	1397.38	1404.41	1414.49	1407.84	1410.22	225.91	179.839	175.891	279.356	307.271	268.313	8.14	6.34	6.22	10.1	10.95	9.47	239.427	0.55155	0.163129	3.38106	0.000722059	0.0162112
ENSG00000134321.11	RSAD2	protein_coding	radical S-adenosyl methionine domain containing 2 [Source:HGNC Symbol;Acc:HGNC:30908]	1555.94	1550.83	1958.77	1838.62	1842.56	1646.6	87.2765	86.9675	85.1323	149.196	127.254	149.76	2.56	2.5	2.44	4.39	3.68	4.3	114.262	0.720627	0.213264	3.37903	0.000727426	0.0163038
ENSG00000149187.18	CELF1	protein_coding	CUGBP Elav-like family member 1 [Source:HGNC Symbol;Acc:HGNC:2549]	3917.16	3876.54	4021.32	3809.34	3840.18	3558.56	5876.38	5895	5696.29	5099.06	4810.31	5237.58	77.5	76.28	73.55	67.48	62.72	67.66	5435.8	-0.204992	0.0607245	-3.37577	0.0007361	0.0164701
ENSG00000105939.12	ZC3HAV1	protein_coding	zinc finger CCCH-type containing, antiviral 1 [Source:HGNC Symbol;Acc:HGNC:23721]	5374.17	5353.01	5356.89	5303.45	5312.16	5460.73	4147.15	4639.9	4525.57	5144.4	5456.69	5012.15	39.13	42.96	41.81	48.72	50.91	46.32	4820.97	0.229521	0.0680751	3.37158	0.000747393	0.0166943
ENSG00000130779.19	CLIP1	protein_coding	CAP-Gly domain containing linker protein 1 [Source:HGNC Symbol;Acc:HGNC:10461]	4833.93	4731.54	5005.29	4523.76	4658.14	4535.44	2548.62	2713.46	2606.78	3107.43	2946.83	3121.71	27.34	28.57	27.4	33.48	31.26	32.81	2840.83	0.223097	0.0662079	3.36964	0.000752654	0.0167833
ENSG00000173020.10	GRK2	protein_coding	G protein-coupled receptor kinase 2 [Source:HGNC Symbol;Acc:HGNC:289]	2812.38	2882.31	2876.74	2779.84	2832.72	2797.03	3858.25	3192.62	3362.09	4075.15	4092.09	4350.9	68.95	55.99	58.83	73.09	72.3	76.16	3821.84	0.265511	0.0788194	3.3686	0.0007555	0.0168182
ENSG00000026950.16	BTN3A1	protein_coding	butyrophilin subfamily 3 member A1 [Source:HGNC Symbol;Acc:HGNC:1138]	2581.41	2886.83	2645.03	2661.41	2460.48	2630.74	201.813	209.403	156.745	333.734	323.578	226.337	3.86	3.94	2.94	6.41	6.13	4.25	241.924	0.634354	0.188368	3.36763	0.000758185	0.0168494
ENSG00000143217.8	NECTIN4	protein_coding	nectin cell adhesion molecule 4 [Source:HGNC Symbol;Acc:HGNC:19688]	3046.94	2670.9	2756.87	2539.7	2694.47	2647.82	277.21	309.426	255.286	354.62	403.703	401.32	5.15	5.64	4.64	6.61	7.41	7.3	333.589	0.465943	0.138393	3.36682	0.000760405	0.0168702
ENSG00000135821.17	GLUL	protein_coding	glutamate-ammonia ligase [Source:HGNC Symbol;Acc:HGNC:4341]	1592.97	1722.1	1870.33	1645.83	1762.04	1706.94	14476	14742.9	12478	12219.1	11765.7	11224.6	426.95	426.75	360.36	361.76	343.12	324.3	12817.8	-0.243928	0.072464	-3.36619	0.00076213	0.01688
ENSG00000183283.15	DAZAP2	protein_coding	DAZ associated protein 2 [Source:HGNC Symbol;Acc:HGNC:2684]	1152.37	1251.11	1240.37	1215.43	1223.52	1172.07	8978.64	8766.03	9151.08	10069	10106.4	10269.6	375.66	359.97	374.9	422.88	418.09	420.88	9556.77	0.178686	0.0531162	3.36406	0.000768053	0.0169825
ENSG00000132530.16	XAF1	protein_coding	XIAP associated factor 1 [Source:HGNC Symbol;Acc:HGNC:30932]	2400.18	2337.19	2642.65	2357.42	2514.8	2371.8	1897.26	2027.97	1427.29	2696.6	2518.6	1975.61	39.41	41.33	29.02	56.21	51.72	40.2	2090.77	0.426449	0.12685	3.36183	0.000774282	0.0170915
ENSG00000196954.13	CASP4	protein_coding	caspase 4 [Source:HGNC Symbol;Acc:HGNC:1505]	1019.67	1027.32	943.612	1008.68	994.674	958.89	312.362	384.972	336.861	434.108	515.161	458.666	15.92	19.26	16.83	22.22	25.97	22.9	407.008	0.444517	0.132341	3.35889	0.000782572	0.0172455
ENSG00000106443.15	PHF14	protein_coding	PHD finger protein 14 [Source:HGNC Symbol;Acc:HGNC:22203]	2794.94	2611.5	2727.71	2938.33	3051.64	2790.18	1783.62	1989.84	1985.99	1619.31	1517.14	1646.73	32.03	35.08	34.92	29.19	26.94	28.97	1757.12	-0.266628	0.0794231	-3.35706	0.000787765	0.0173308
ENSG00000086712.12	TXLNG	protein_coding	taxilin gamma [Source:HGNC Symbol;Acc:HGNC:18578]	4222.54	4198.86	4180.89	4194.73	4165.76	4218.97	1425.33	1498.27	1520.94	1237.23	1230.99	1245.58	17.17	17.72	17.94	14.96	14.66	14.7	1359.73	-0.258973	0.0771713	-3.35582	0.000791312	0.0173797
ENSG00000106868.16	SUSD1	protein_coding	sushi domain containing 1 [Source:HGNC Symbol;Acc:HGNC:25413]	2587.06	2685.19	2604.33	2138.8	2262.44	2390.74	334.896	311.526	374.105	470.004	472.46	434.546	6.95	6.34	7.6	9.79	9.69	8.83	399.586	0.426738	0.127208	3.35466	0.000794628	0.0173944
ENSG00000109929.9	SC5D	protein_coding	sterol-C5-desaturase [Source:HGNC Symbol;Acc:HGNC:10547]	1920.33	1962.79	1853.14	1956.83	1995.66	1901.19	441.264	558.472	662.024	712.474	750.017	818.843	11.56	14.35	16.97	18.73	19.42	21	657.167	0.457577	0.136391	3.35488	0.000793981	0.0173944
ENSG00000166025.17	AMOTL1	protein_coding	angiomotin like 1 [Source:HGNC Symbol;Acc:HGNC:17811]	8643.04	8294.18	8670.62	8767.41	8778.56	8729.96	915.891	864.51	907.784	764.916	610.955	727.197	5.36	4.96	5.2	4.49	3.53	4.17	798.554	-0.351616	0.104858	-3.35326	0.000798652	0.0174534
ENSG00000222041.10	CYTOR	lincRNA	cytoskeleton regulator RNA [Source:HGNC Symbol;Acc:HGNC:28717]	405.877	390.945	395.925	401.691	404.695	402.306	523.67	545.127	496.03	393.902	387.24	414.382	66.14	67.66	61.38	49.9	48.35	51.32	460.063	-0.384877	0.114869	-3.35056	0.000806485	0.0175953
ENSG00000182093.14	WRB	protein_coding	tryptophan rich basic protein [Source:HGNC Symbol;Acc:HGNC:12790]	1201.64	1211.7	1249.37	1207.73	1236.49	1214.64	2449.23	2503.14	2273.6	2131.72	2001.08	1945.37	101.49	101.81	92.26	88.71	81.97	78.97	2217.37	-0.249374	0.0745549	-3.34484	0.000823291	0.0179322
ENSG00000103187.7	COTL1	protein_coding	coactosin like F-actin binding protein 1 [Source:HGNC Symbol;Acc:HGNC:18304]	1570.1	1581.36	1594.39	1556.6	1588.1	1588.73	998.665	1042.49	1130.48	879.941	859.405	832.507	31.96	32.75	35.44	28.27	27.19	26.11	957.26	-0.30428	0.0910913	-3.34039	0.00083661	0.0181921
ENSG00000179195.15	ZNF664	protein_coding	zinc finger protein 664 [Source:HGNC Symbol;Acc:HGNC:25406]	3527.36	3719.72	3669.47	3708.15	3570.12	3764.1	7636.4	7854.76	8093.29	6968.9	7016.83	6676.24	105.54	106.55	109.54	96.68	95.89	90.38	7374.44	-0.191591	0.0573731	-3.33939	0.000839633	0.0182277
ENSG00000159199.13	ATP5G1	protein_coding	ATP synthase, H+ transporting, mitochondrial Fo complex subunit C1 (subunit 9) [Source:HGNC Symbol;Acc:HGNC:841]	357.652	324.984	337.657	333.701	331.108	349.797	3155.54	2868.12	3061.93	2725	2405.27	2524.85	470.73	419.96	447.25	408.06	354.8	368.97	2790.12	-0.247346	0.0740824	-3.33879	0.000841428	0.0182365
ENSG00000115970.18	THADA	protein_coding	THADA, armadillo repeat containing [Source:HGNC Symbol;Acc:HGNC:19217]	3392.52	3676.61	3454.12	4084.35	4534.25	3188.3	1339.09	1236.51	1327.29	949.516	850.884	1194.5	18.33	16.61	17.79	13.05	11.51	16.02	1149.64	-0.381095	0.114192	-3.33732	0.000845891	0.0182729
ENSG00000147394.18	ZNF185	protein_coding	zinc finger protein 185 with LIM domain [Source:HGNC Symbol;Acc:HGNC:12976]	3746.43	3695.51	3655.49	3723.49	3654.75	3741	1227.69	1313.4	1247.64	1066.19	1064.71	995.132	16.77	17.6	16.69	14.62	14.38	13.32	1152.45	-0.278117	0.0833339	-3.33739	0.000845704	0.0182729
ENSG00000189319.13	FAM53B	protein_coding	family with sequence similarity 53 member B [Source:HGNC Symbol;Acc:HGNC:28968]	5043.99	5094.49	5057.01	5070.52	5198.44	5171.21	2037.67	1791.79	2078.52	1605.38	1554.23	1710.41	20.18	17.41	20.16	15.96	15.23	16.59	1796.32	-0.278482	0.0834591	-3.33675	0.000847654	0.0182809
ENSG00000111731.12	C2CD5	protein_coding	C2 calcium dependent domain containing 5 [Source:HGNC Symbol;Acc:HGNC:29062]	3408.62	3737.65	3467.51	3808.52	3982.45	3896.37	1368.09	1262.08	1380.94	1173.43	1073.29	1034.56	18.65	16.87	18.43	16.05	14.46	13.82	1215.41	-0.291533	0.0873942	-3.33584	0.000850424	0.0183106
ENSG00000213047.12	DENND1B	protein_coding	DENN domain containing 1B [Source:HGNC Symbol;Acc:HGNC:28404]	6374.12	6086.43	5733.42	5762.48	5697.99	5711.16	708.839	816.711	881.648	1026.58	970.751	1046.87	6.08	6.89	7.41	8.84	8.25	8.81	908.569	0.340702	0.102172	3.33459	0.000854252	0.0183629
ENSG00000163704.11	PRRT3	protein_coding	proline rich transmembrane protein 3 [Source:HGNC Symbol;Acc:HGNC:26591]	2747.66	2685.06	2588.63	2889.96	2655.52	2767.69	784.805	677.363	705.933	818.268	1009.22	962.716	14.58	12.35	12.85	15.26	18.54	17.52	826.38	0.361234	0.10839	3.33274	0.000859953	0.0184553
ENSG00000267041.5	ZNF850	protein_coding	zinc finger protein 850 [Source:HGNC Symbol;Acc:HGNC:27994]	3657.32	7372.05	5169.76	7532.74	7532.2	7132.48	219.075	115.165	171.205	83.909	109.53	90.0653	1.78	0.92	1.37	0.69	0.88	0.72	131.464	-0.826091	0.24806	-3.33021	0.000867808	0.0185935
ENSG00000178295.14	GEN1	protein_coding	GEN1, Holliday junction 5' flap endonuclease [Source:HGNC Symbol;Acc:HGNC:26881]	4711.83	4323.07	4424.61	5082.3	5184.53	5252.5	1002.39	1228.06	1257.94	961.004	932.453	837.981	10.53	12.66	12.93	10.13	9.68	8.62	1036.67	-0.354597	0.106499	-3.32959	0.000869728	0.0186042
ENSG00000227766.1	AL671277.1	unprocessed_pseudogene		814.54	807.37	810.72	811.74	811.2	810.97	100.002	79.6757	68.6004	164.244	119.746	142.957	6.23	4.84	4.18	10.28	7.37	8.71	112.537	0.7864	0.236246	3.32873	0.000872431	0.0186317
ENSG00000164182.10	NDUFAF2	protein_coding	NADH:ubiquinone oxidoreductase complex assembly factor 2 [Source:HGNC Symbol;Acc:HGNC:28086]	514.488	506.07	508.157	514.911	521.905	515.092	673.534	726.448	767.904	584.89	554.651	569.066	66.37	70.19	74.05	57.84	54.07	54.87	646.082	-0.34312	0.103238	-3.32359	0.000888667	0.0189477
ENSG00000132300.18	PTCD3	protein_coding	pentatricopeptide repeat domain 3 [Source:HGNC Symbol;Acc:HGNC:24717]	1612.86	1709.67	1805.17	1757.61	1952.22	1675.38	2258.42	2294.83	1982.56	1876.15	1632.25	1841.67	65.27	65.12	56.13	54.46	46.66	52.16	1980.98	-0.286745	0.0863241	-3.32173	0.000894622	0.0190129
ENSG00000145604.15	SKP2	protein_coding	S-phase kinase associated protein 2 [Source:HGNC Symbol;Acc:HGNC:10901]	2776.86	2847.97	2853.46	3098.21	2760.95	2890.45	939.525	900.616	967.771	779.049	738.369	762.137	16.56	15.58	16.71	13.78	12.87	13.16	847.914	-0.300713	0.0905184	-3.32212	0.000893347	0.0190129
ENSG00000173706.12	HEG1	protein_coding	heart development protein with EGF like domains 1 [Source:HGNC Symbol;Acc:HGNC:29227]	4648.46	5514.27	4438.35	8212.2	6619.89	6671.28	213.953	169.094	240.718	98.4362	135.026	151.137	1.84	1.43	2.03	0.85	1.14	1.27	168.141	-0.707677	0.213157	-3.31998	0.000900234	0.0191012
ENSG00000141027.20	NCOR1	protein_coding	nuclear receptor corepressor 1 [Source:HGNC Symbol;Acc:HGNC:7672]	4638.83	4492.32	4737.45	4011.44	3958.96	4393.24	4306.52	4285.01	4247.51	5154.24	4911.95	4725.48	49.93	48.75	48.21	59.98	56.31	53.65	4605.13	0.203836	0.0614314	3.31811	0.000906303	0.019199
ENSG00000068323.16	TFE3	protein_coding	transcription factor binding to IGHM enhancer 3 [Source:HGNC Symbol;Acc:HGNC:11752]	3129.08	3044.05	3104.01	3072.77	3056.5	3077.76	1893.68	1768.06	1749.66	2112.16	2153.72	2112.48	31.08	28.48	28.13	34.8	34.96	33.97	1964.96	0.236697	0.0713475	3.31752	0.000908201	0.0192082
ENSG00000099991.17	CABIN1	protein_coding	calcineurin binding protein 1 [Source:HGNC Symbol;Acc:HGNC:24187]	4591.83	4645.33	4438.15	4356.88	4297.24	4525.68	1961.48	1928.24	1945.5	1700.14	1524.33	1678.75	22.17	21.4	21.53	19.29	17.03	18.59	1789.77	-0.24941	0.0752463	-3.31459	0.000917787	0.0193487
ENSG00000138411.10	HECW2	protein_coding	HECT, C2 and WW domain containing E3 ubiquitin protein ligase 2 [Source:HGNC Symbol;Acc:HGNC:29853]	3536.08	5189.74	4992.23	5404.99	6029.75	5009.74	429.276	334.856	383.606	256.53	254.784	302.673	4.37	3.35	3.83	2.62	2.57	3.03	326.922	-0.488377	0.147333	-3.3148	0.000917101	0.0193487
ENSG00000138376.10	BARD1	protein_coding	BRCA1 associated RING domain 1 [Source:HGNC Symbol;Acc:HGNC:952]	4246.32	4322.77	3224.95	4615.98	4418.5	4205.27	658.08	728.033	973.874	546.142	622.458	550.772	8.02	8.71	11.63	6.69	7.51	6.58	679.872	-0.456984	0.138021	-3.31097	0.000929736	0.0195691
ENSG00000112186.11	CAP2	protein_coding	cyclase associated actin cytoskeleton regulatory protein 2 [Source:HGNC Symbol;Acc:HGNC:20039]	2386.8	2574.11	2632.25	2573.64	2522.77	2409.31	777.893	736.11	772.72	973.183	861.2	1024.78	15.65	14.53	15.21	19.64	17.12	20.19	857.638	0.324459	0.0980601	3.30877	0.000937055	0.0196917
ENSG00000204267.13	TAP2	protein_coding	transporter 2, ATP binding cassette subfamily B member [Source:HGNC Symbol;Acc:HGNC:44]	3148.73	2994.18	3358.25	3339.19	3146.91	3194.75	3574.42	3641.03	3265.31	3967.42	4639.07	3974.25	56.58	56.57	50.61	63.05	72.62	61.62	3843.59	0.262879	0.0794723	3.3078	0.000940318	0.0197287
ENSG00000173821.19	RNF213	protein_coding	ring finger protein 213 [Source:HGNC Symbol;Acc:HGNC:14539]	7933.46	7307.15	7733.51	7339.64	6948.21	7629.84	6659.45	7019.06	5885.06	8208.41	8243	7112.97	45.06	46.6	38.98	55.73	55.14	47.12	7187.94	0.267876	0.0811036	3.30289	0.000956941	0.0200454
ENSG00000115760.13	BIRC6	protein_coding	baculoviral IAP repeat containing 6 [Source:HGNC Symbol;Acc:HGNC:13516]	7284.2	7374.63	7303.31	6325.27	6794.78	6510.25	4507.06	4738.24	4760.59	5494.57	5116.97	5540.47	32.93	33.97	34.06	40.3	36.98	39.66	5026.32	0.206455	0.0625473	3.30077	0.000964191	0.0200872
ENSG00000132323.8	ILKAP	protein_coding	ILK associated serine/threonine phosphatase [Source:HGNC Symbol;Acc:HGNC:15566]	1156.02	1143.45	1154.76	1145.03	1111.88	1094.23	571.559	542.714	536.257	426.662	399.373	446.082	25.48	23.76	23.41	19.11	17.61	19.48	487.103	-0.372294	0.112785	-3.30092	0.000963688	0.0200872
ENSG00000167508.11	MVD	protein_coding	mevalonate diphosphate decarboxylase [Source:HGNC Symbol;Acc:HGNC:7529]	1419.18	1317.84	1358.77	1413.93	1366.9	1429.97	1669.18	1456.26	1477.48	1786.5	1839.16	1931.04	61	52.22	52.88	65.54	66.45	69.11	1693.25	0.271314	0.0822034	3.30052	0.000965056	0.0200872
ENSG00000168679.17	SLC16A4	protein_coding	solute carrier family 16 member 4 [Source:HGNC Symbol;Acc:HGNC:10925]	2333.64	2237.9	2404.39	2253.94	2132.76	2158	27.06	37.6162	35.5856	65.4644	75.2896	67.3207	0.61	0.83	0.78	1.47	1.67	1.48	51.3774	1.05236	0.318755	3.30149	0.000961731	0.0200872
ENSG00000137216.18	TMEM63B	protein_coding	transmembrane protein 63B [Source:HGNC Symbol;Acc:HGNC:17735]	2675.09	2627.45	2742.25	2719.25	2725.03	2684.4	1763.02	1646.93	1579.33	1902.97	2009.77	2031.38	33.08	30.33	29.02	35.84	37.28	37.33	1822.22	0.2528	0.0766283	3.29904	0.000970166	0.0201115
ENSG00000204389.9	HSPA1A	protein_coding	heat shock protein family A (Hsp70) member 1A [Source:HGNC Symbol;Acc:HGNC:5232]	2215.71	2143.57	2166.45	2179.37	2198.54	2195.46	13253.6	11726.9	12178.2	13677.1	14468.1	15039.7	306.99	266.59	276.21	318.02	331.39	341.27	13390.5	0.216697	0.0656874	3.29892	0.000970584	0.0201115
ENSG00000274173.1	AL035661.1	lincRNA		965.54	958.37	961.72	962.74	962.2	961.97	354.297	423.114	415.705	450.924	618.927	571.816	18.62	21.83	21.39	23.79	32.17	29.44	472.461	0.459853	0.139398	3.29885	0.000970814	0.0201115
ENSG00000084070.11	SMAP2	protein_coding	small ArfGAP2 [Source:HGNC Symbol;Acc:HGNC:25082]	2565.6	2587.99	2530.4	2536.57	2582.45	2558.53	940.757	1028.92	995.503	1224.23	1175.29	1190.81	18.58	19.95	19.26	24.27	22.95	23.04	1092.58	0.276832	0.0839695	3.29682	0.000977851	0.0201664
ENSG00000113924.11	HGD	protein_coding	homogentisate 1,2-dioxygenase [Source:HGNC Symbol;Acc:HGNC:4892]	800.312	561.111	1481.78	1189.85	1320.44	1271.81	24.8949	29.6437	19.2931	48.2889	49.1579	72.7323	1.2	1.4	0.91	2.34	2.34	3.44	40.6922	1.26898	0.384918	3.29676	0.00097807	0.0201664
ENSG00000185418.15	TARSL2	protein_coding	threonyl-tRNA synthetase like 2 [Source:HGNC Symbol;Acc:HGNC:24728]	2342.77	2794.72	2422.3	2941.34	2829.99	2945.56	342.221	255.201	344.609	199.337	223.526	226.244	6.41	4.69	6.32	3.75	4.14	4.15	265.186	-0.538871	0.16344	-3.29705	0.000977044	0.0201664
ENSG00000148773.13	MKI67	protein_coding	marker of proliferation Ki-67 [Source:HGNC Symbol;Acc:HGNC:7107]	10636	9811.1	10205.7	10279.6	10788.8	10524.8	13295.4	13262	14069.7	12512.8	10882	11596	64.82	63.47	67.18	61.26	52.47	55.39	12603	-0.215389	0.0653481	-3.29602	0.000980647	0.0201878
ENSG00000101294.16	HM13	protein_coding	histocompatibility minor 13 [Source:HGNC Symbol;Acc:HGNC:16435]	1230.25	1235.02	1262.47	1251.01	1271.97	1252.81	4062.08	4029.02	4110.35	4491.14	4667.34	4879.44	164.25	159.91	162.75	182.31	186.65	193.27	4373.22	0.202577	0.061526	3.29255	0.000992823	0.0203746
ENSG00000114942.13	EEF1B2	protein_coding	eukaryotic translation elongation factor 1 beta 2 [Source:HGNC Symbol;Acc:HGNC:3208]	689.075	672.982	679.301	688.955	683.878	684.333	9694.18	10874.2	11437.3	8381.82	8958.09	9594.85	717.68	790.06	829.09	622.82	655.71	695.78	9823.42	-0.248728	0.0755421	-3.29257	0.000992759	0.0203746
ENSG00000023445.13	BIRC3	protein_coding	baculoviral IAP repeat containing 3 [Source:HGNC Symbol;Acc:HGNC:591]	4704.61	4382.93	3990.94	3676.67	4312.57	4258.44	186.152	382.953	283.135	429.194	523.965	397.956	2.24	4.51	3.33	5.17	6.23	4.69	367.233	0.668458	0.203124	3.29088	0.000998738	0.020464
ENSG00000140993.10	TIGD7	protein_coding	tigger transposable element derived 7 [Source:HGNC Symbol;Acc:HGNC:18331]	2421.01	2538.79	2742.03	2772.63	3209.89	2873.3	307.101	348.338	330.392	251.33	250.022	190.63	5.65	6.29	5.96	4.64	4.54	3.45	279.631	-0.515936	0.156815	-3.29009	0.00100157	0.02049
ENSG00000167861.15	HID1	protein_coding	HID1 domain containing [Source:HGNC Symbol;Acc:HGNC:15736]	2269.07	2422.12	2437.08	2580.83	2498.67	2572.42	2029.33	1812.02	1661.02	2087.92	2368.47	2281.74	41.7	36.54	33.43	43.07	48.11	45.92	2040.05	0.292097	0.088796	3.28953	0.00100355	0.0204986
ENSG00000124767.6	GLO1	protein_coding	glyoxalase I [Source:HGNC Symbol;Acc:HGNC:4323]	1831.88	1824.16	1826.26	1827.72	1827.93	1828.22	5175.1	5845.14	5833.8	4925.85	4904.27	4494.26	143.18	158.72	158.04	136.8	134.17	121.8	5196.42	-0.235176	0.0715335	-3.28764	0.00101033	0.0205731
ENSG00000253719.3	ATXN7L3B	protein_coding	ataxin 7 like 3B [Source:HGNC Symbol;Acc:HGNC:37931]	7425.54	7418.37	7421.72	7422.74	7422.2	7421.97	6767.12	7201.61	7139.82	8088.12	8158.56	7816.71	46.1	48.16	47.63	55.31	54.97	52.17	7528.64	0.188755	0.057408	3.28795	0.00100918	0.0205731
ENSG00000196865.4	NHLRC2	protein_coding	NHL repeat containing 2 [Source:HGNC Symbol;Acc:HGNC:24731]	8892.1	9563.56	9015.97	8683.56	9369.36	9134.78	1489.71	1598.64	1686.98	1438.57	1186.1	1235.86	8.27	8.71	9.17	8.02	6.51	6.72	1439.31	-0.306707	0.093442	-3.28233	0.00102955	0.020932
ENSG00000117479.12	SLC19A2	protein_coding	solute carrier family 19 member 2 [Source:HGNC Symbol;Acc:HGNC:10938]	3420.66	3316.33	3249.81	3378.92	3364.26	3378.72	1742.52	2018.37	1927.76	2243.9	2385.82	2188.02	26.29	29.89	28.49	33.99	35.6	32.34	2084.39	0.260902	0.0795543	3.27954	0.00103975	0.0211069
ENSG00000143375.14	CGN	protein_coding	cingulin [Source:HGNC Symbol;Acc:HGNC:17429]	4089.5	4025.02	4338.63	3505.02	4365.99	4031.19	3755.03	4024.35	3414.58	5145.41	4221.67	4306.89	46.9	49.33	41.75	64.5	52.14	52.69	4144.65	0.288876	0.0881101	3.27858	0.00104332	0.0211139
ENSG00000168014.16	C2CD3	protein_coding	C2 calcium dependent domain containing 3 [Source:HGNC Symbol;Acc:HGNC:24564]	4665.48	4393.15	4292.55	4323.25	4103.41	3830.92	1301.23	1354.76	1388.96	1070.36	1102.31	1176.29	15.44	15.79	16.14	12.74	12.94	13.67	1232.34	-0.271621	0.082838	-3.27894	0.00104197	0.0211139
ENSG00000176986.15	SEC24C	protein_coding	SEC24 homolog C, COPII coat complex component [Source:HGNC Symbol;Acc:HGNC:10705]	4034.61	4023.84	4122.73	4148.35	4070.53	4135.42	5355.85	5174.13	5200.52	5761.87	6090.94	6124.86	66.23	62.8	62.97	71.52	74.47	74.2	5618.02	0.19253	0.0587325	3.27808	0.00104516	0.0211186
ENSG00000137563.11	GGH	protein_coding	gamma-glutamyl hydrolase [Source:HGNC Symbol;Acc:HGNC:4248]	1086.61	1109.08	1140.16	1021.98	1075.17	1135.9	1244.38	1238.37	1246.98	1085.73	1037.93	944.036	57.52	56.17	56.44	50.38	47.44	42.74	1132.91	-0.284746	0.0869213	-3.27591	0.00105322	0.0212489
ENSG00000114405.10	C3orf14	protein_coding	chromosome 3 open reading frame 14 [Source:HGNC Symbol;Acc:HGNC:25024]	563.116	542.432	553.354	553.681	550.042	549.766	2644.86	3153.61	3117.8	2475.44	2463.34	2496.52	242.3	283.5	279.64	227.64	223.1	224.04	2725.26	-0.261457	0.0798513	-3.2743	0.00105924	0.0213375
ENSG00000106976.20	DNM1	protein_coding	dynamin 1 [Source:HGNC Symbol;Acc:HGNC:2972]	2524.51	2594.83	2744	2706.3	2938.82	2693.72	1548.62	1169.51	1043.52	1029.02	833.665	925.821	29.03	21.52	19.16	19.38	15.46	17.01	1091.67	-0.430369	0.131665	-3.26867	0.00108054	0.0217333
ENSG00000163141.18	BNIPL	protein_coding	BCL2 interacting protein like [Source:HGNC Symbol;Acc:HGNC:16976]	1855.47	1664.6	1499.76	1882.41	1919.39	1851.78	89.0135	103.744	94.6986	149.705	173.956	139.148	2.54	2.91	2.64	4.29	4.91	3.88	125.035	0.684487	0.20959	3.26584	0.0010914	0.0219181
ENSG00000196776.14	CD47	protein_coding	CD47 molecule [Source:HGNC Symbol;Acc:HGNC:1682]	1300.81	1287.92	1252.9	1225.31	1202.45	1202.01	12064.1	13469.7	13645.5	15289	15145.9	14734.5	490.12	537.1	542.84	623.51	608.45	586.41	14058.1	0.205169	0.0629225	3.26066	0.00111155	0.0222886
ENSG00000139192.11	TAPBPL	protein_coding	TAP binding protein like [Source:HGNC Symbol;Acc:HGNC:30683]	1330.6	1186.75	1263.93	1035.12	1186.77	1281.25	448.468	469.087	440.591	663.204	599.652	523.837	18.73	19.23	18.03	27.83	24.78	21.44	524.147	0.392278	0.120463	3.25642	0.00112827	0.0225894
ENSG00000094916.15	CBX5	protein_coding	chromobox 5 [Source:HGNC Symbol;Acc:HGNC:1555]	7954.79	8232.93	8321.95	8045.66	8032.05	8292.33	8140.56	8061.95	9049.14	7231.95	7092.03	7488.73	50.54	49.11	55	45.06	43.53	45.55	7844.04	-0.211168	0.064885	-3.25449	0.00113596	0.0226922
ENSG00000223572.9	CKMT1A	protein_coding	creatine kinase, mitochondrial 1A [Source:HGNC Symbol;Acc:HGNC:31736]	1520.8	1458.71	1496.91	1539.84	1388.14	1463.26	746.945	575.942	770.369	938.864	924.999	864.91	25.57	19.34	25.82	32.25	31.33	29	803.658	0.377598	0.116032	3.25427	0.00113685	0.0226922
ENSG00000159348.12	CYB5R1	protein_coding	cytochrome b5 reductase 1 [Source:HGNC Symbol;Acc:HGNC:13397]	1373.55	1426.67	1403.98	1393.16	1420.41	1410.55	1512.72	1635.3	1669.54	1760.18	2037.26	2034.16	54.46	57.78	58.86	63.61	72.53	71.73	1774.85	0.275504	0.0847173	3.25204	0.0011458	0.0228361
ENSG00000150551.10	LYPD1	protein_coding	LY6/PLAUR domain containing 1 [Source:HGNC Symbol;Acc:HGNC:28431]	1568.52	1636.32	1592.05	1593.42	1606.3	1585.65	295.682	311.812	326.491	200.267	236.788	232.79	9.36	9.68	10.12	6.35	7.4	7.23	267.309	-0.480773	0.147875	-3.25122	0.00114911	0.0228674
ENSG00000123595.7	RAB9A	protein_coding	RAB9A, member RAS oncogene family [Source:HGNC Symbol;Acc:HGNC:9792]	1256.11	1270.18	1215.85	1122.21	1096.46	1225.77	609.881	711.544	719.158	857.556	948.158	802.476	25.79	29.53	29.78	36.4	39.65	33.24	774.796	0.350846	0.107948	3.25015	0.00115342	0.0228949
ENSG00000170385.9	SLC30A1	protein_coding	solute carrier family 30 member 1 [Source:HGNC Symbol;Acc:HGNC:11012]	5295.54	5288.37	5291.72	5292.74	5292.2	5291.97	2772.17	3366.27	3117.23	2620.03	2657.6	2386.68	26.49	31.57	29.17	25.13	25.11	22.34	2820.01	-0.272682	0.0839017	-3.25002	0.00115398	0.0228949
ENSG00000174371.16	EXO1	protein_coding	exonuclease 1 [Source:HGNC Symbol;Acc:HGNC:3511]	2475.22	2445.35	2596.02	2500.67	2146.35	2669	848.334	957.629	894.767	674.982	807.167	635.522	17.38	19.27	17.96	13.9	16.36	12.77	803.058	-0.356963	0.109851	-3.24953	0.00115596	0.0228995
ENSG00000160710.15	ADAR	protein_coding	adenosine deaminase, RNA specific [Source:HGNC Symbol;Acc:HGNC:225]	5468.45	5527.38	5240.51	5303.37	5315.69	5350.71	21388.5	21070	22383.7	24666.4	24552.3	23834.7	201.53	194.85	206.52	233.3	228.75	219.98	22982.5	0.171744	0.0529381	3.24424	0.00117763	0.0232936
ENSG00000182704.7	TSKU	protein_coding	tsukushi, small leucine rich proteoglycan [Source:HGNC Symbol;Acc:HGNC:28850]	2510.32	2553.76	2535.6	2508.06	2530.99	2511.66	4717.69	4419.39	4692.6	4875.93	5671.93	5940	94.48	86.86	92.02	98.02	112.31	116.54	5052.91	0.253625	0.0782558	3.24098	0.00119121	0.0235268
ENSG00000023287.12	RB1CC1	protein_coding	RB1 inducible coiled-coil 1 [Source:HGNC Symbol;Acc:HGNC:15574]	5498.25	6020	5700.17	5733.94	5884.01	5846.95	1632.56	1678.02	1756.97	1489.73	1375.64	1391.58	14.28	14.41	15.05	13.09	11.9	11.93	1554.08	-0.251476	0.0776521	-3.23849	0.00120163	0.0236615
ENSG00000181789.14	COPG1	protein_coding	coatomer protein complex subunit gamma 1 [Source:HGNC Symbol;Acc:HGNC:2236]	1994.48	1758.66	1835.41	1927.14	1921.83	1966.55	7044.66	7571.54	7380.65	7980.02	8564.15	8715.94	187.6	197.88	192.46	213.32	225.51	227.36	7876.14	0.199888	0.06172	3.23862	0.00120108	0.0236615
ENSG00000118007.12	STAG1	protein_coding	stromal antigen 1 [Source:HGNC Symbol;Acc:HGNC:11354]	5589.51	5673.31	5308.92	5663.84	5663.18	5685.93	2004.49	1918.81	2396.39	1808.72	1638.13	1686.45	18.11	17.03	21.19	16.41	14.64	14.93	1908.77	-0.300191	0.092712	-3.23789	0.00120416	0.0236758
ENSG00000166435.15	XRRA1	protein_coding	X-ray radiation resistance associated 1 [Source:HGNC Symbol;Acc:HGNC:18868]	3568.41	3546.5	3005.4	3397.56	2800.73	3456.58	312.935	303.069	314.006	239.775	231.841	197.792	4.82	4.58	4.73	3.7	3.52	2.98	266.574	-0.481484	0.148729	-3.23734	0.00120652	0.023678
ENSG00000241472.6	PTPRG-AS1	processed_transcript	PTPRG antisense RNA 1 [Source:HGNC Symbol;Acc:HGNC:44638]	1015.71	915.983	1043.97	1030.81	1120.03	1040.86	280.6	336.342	257.403	206.404	196.016	205.327	13.83	16.26	12.4	10.22	9.56	9.93	247.014	-0.516801	0.159654	-3.23701	0.00120788	0.023678
ENSG00000184903.9	IMMP2L	protein_coding	inner mitochondrial membrane peptidase subunit 2 [Source:HGNC Symbol;Acc:HGNC:14598]	519.584	355.625	733.727	782.749	647.069	608.047	90.2553	99.4562	72.95	37.1877	41.6462	54.5924	7.75	8.38	6.13	3.2	3.54	4.58	66.0243	-0.957734	0.295932	-3.23633	0.00121076	0.0236992
ENSG00000087074.7	PPP1R15A	protein_coding	protein phosphatase 1 regulatory subunit 15A [Source:HGNC Symbol;Acc:HGNC:14375]	2171.71	2163.53	2178.09	2171.92	2175.63	2171.94	675.078	723.457	666.515	799.399	896.108	869.946	15.72	16.53	15.19	18.68	20.63	19.84	771.75	0.313846	0.0972702	3.22654	0.00125299	0.0244892
ENSG00000196116.7	TDRD7	protein_coding	tudor domain containing 7 [Source:HGNC Symbol;Acc:HGNC:30831]	3608.07	3495.7	3519.57	3492.75	3568.71	3521.72	1756.5	1932.42	1848.27	2226.38	2232.16	2080.32	25.13	27.13	25.9	31.97	31.58	29.16	2012.66	0.239396	0.0742545	3.224	0.00126415	0.0246704
ENSG00000224287.2	MSL3P1	transcribed_processed_pseudogene	MSL complex subunit 3 pseudogene 1 [Source:HGNC Symbol;Acc:HGNC:17837]	1829.54	1829.13	1814.04	1812.91	1828.3	1793.73	507.033	575.412	545.58	458.935	384.003	397.337	14.1	15.7	14.86	12.82	10.56	10.83	478.056	-0.390765	0.121221	-3.22357	0.00126602	0.0246704
ENSG00000173221.13	GLRX	protein_coding	glutaredoxin [Source:HGNC Symbol;Acc:HGNC:4330]	770.419	729.279	914.799	971.341	755.134	819.255	135.174	173.715	125.48	200.969	244.672	213.118	8.33	10.47	7.57	12.4	14.89	12.83	182.168	0.605641	0.188051	3.22063	0.00127909	0.0248882
ENSG00000109171.14	SLAIN2	protein_coding	SLAIN motif family member 2 [Source:HGNC Symbol;Acc:HGNC:29282]	2086.96	2035.54	2299.23	2508.8	2363.33	2859.29	1528.94	1519.56	1452.43	1276.46	1311.59	1165.42	33	32.19	30.7	27.65	27.99	24.64	1375.74	-0.26465	0.0821904	-3.21997	0.00128204	0.0249087
ENSG00000143164.15	DCAF6	protein_coding	DDB1 and CUL4 associated factor 6 [Source:HGNC Symbol;Acc:HGNC:30002]	2611.21	2822.29	2635.08	2645.23	2570.25	2538.85	2334.18	2138.37	2279.79	2611.92	2710.09	2570.04	44.78	40.26	42.83	50.31	51.41	48.3	2440.73	0.223796	0.0695149	3.21939	0.00128462	0.024922
ENSG00000172965.14	MIR4435-2HG	lincRNA	MIR4435-2 host gene [Source:HGNC Symbol;Acc:HGNC:35163]	379.449	370.549	371.941	363.575	366.715	366.568	498.139	581.134	549.451	413.02	434.188	409.479	68.16	77.95	73.59	56.61	58.75	54.83	480.907	-0.374587	0.116406	-3.21793	0.0012912	0.0250127
ENSG00000074370.17	ATP2A3	protein_coding	ATPase sarcoplasmic/endoplasmic reticulum Ca2+ transporting 3 [Source:HGNC Symbol;Acc:HGNC:813]	3939.88	3749.15	4037.94	3849.61	3963.55	3977.65	1644	1866.27	1608.2	1802.21	2306.82	2318.94	21.22	23.64	20.31	23.34	29.44	29.31	1924.41	0.329797	0.102519	3.21694	0.00129564	0.0250279
ENSG00000185201.16	IFITM2	protein_coding	interferon induced transmembrane protein 2 [Source:HGNC Symbol;Acc:HGNC:5413]	523.282	509.419	514.967	505.656	508.801	513.136	1562.25	1318.85	1360.74	1667.14	1735	1733.55	154.1	127.68	131.46	165.11	169.25	167.51	1562.92	0.274862	0.0854427	3.21691	0.00129579	0.0250279
ENSG00000101447.14	FAM83D	protein_coding	family with sequence similarity 83 member D [Source:HGNC Symbol;Acc:HGNC:16122]	2206.56	2181.42	2187.29	2190.75	2194.83	2187.26	1258.82	1089.22	1201.77	991.895	910.9	991.781	29.05	24.67	27.15	22.98	20.78	22.42	1074.06	-0.294088	0.0914631	-3.21538	0.00130273	0.0251249
ENSG00000065526.10	SPEN	protein_coding	spen family transcriptional repressor [Source:HGNC Symbol;Acc:HGNC:17575]	7275.74	6935.69	7186.47	7193.22	6477.03	6916.61	4521.36	4359.91	4426.53	4820.62	5273.22	5225.88	32.71	30.95	31.35	34.99	37.71	37.02	4771.21	0.202214	0.0628986	3.21492	0.0013048	0.025128
ENSG00000115183.14	TANC1	protein_coding	tetratricopeptide repeat, ankyrin repeat and coiled-coil containing 1 [Source:HGNC Symbol;Acc:HGNC:29364]	6422.22	6344.41	6263.08	6340.94	6364.87	6379.75	989.772	1030.06	1046.55	797.532	867.581	851.497	7.88	8.05	8.16	6.38	6.83	6.64	930.475	-0.284852	0.0886209	-3.21428	0.00130774	0.0251476
ENSG00000184432.9	COPB2	protein_coding	coatomer protein complex subunit beta 2 [Source:HGNC Symbol;Acc:HGNC:2232]	2701.81	2678.84	2741.33	2718.36	2710.83	2747.94	6614.02	7510.37	7371.75	8271.99	8532.84	8083.8	123.12	137.21	134.37	154.58	157.07	147.41	7730.79	0.211266	0.0657424	3.21354	0.0013111	0.0251547
ENSG00000188488.13	SERPINA5	protein_coding	serpin family A member 5 [Source:HGNC Symbol;Acc:HGNC:8723]	1853.17	1854.78	1999.12	1870.5	2062.44	1903.77	621.307	850.183	687.961	830.312	1059.84	969.909	16.34	21.95	17.72	21.92	27.56	24.99	836.582	0.407492	0.126812	3.21336	0.00131193	0.0251547
ENSG00000278828.1	HIST1H3H	protein_coding	histone cluster 1 H3 family member h [Source:HGNC Symbol;Acc:HGNC:4775]	1058.54	1051.37	1054.72	1055.74	1055.2	1054.97	722.344	775.444	864.44	913.712	1100.62	981.879	34.62	36.48	40.57	43.96	52.16	46.1	893.069	0.340192	0.105911	3.21206	0.00131786	0.0252314
ENSG00000110436.11	SLC1A2	protein_coding	solute carrier family 1 member 2 [Source:HGNC Symbol;Acc:HGNC:10940]	5360.24	5649.45	4479.88	4574.69	4342.65	4348.44	259.836	320.201	314.644	176.846	245.153	191.574	2.75	3.34	3.26	1.88	2.58	2	251.338	-0.547285	0.170511	-3.20969	0.0013288	0.0254039
ENSG00000126216.13	TUBGCP3	protein_coding	tubulin gamma complex associated protein 3 [Source:HGNC Symbol;Acc:HGNC:18598]	2733.95	3164.92	2989.12	3091.91	3111.6	2841.68	887.013	807.803	879.386	688.658	677.674	717.216	15.03	13.43	14.59	11.71	11.35	11.91	776.31	-0.305156	0.0951403	-3.20744	0.00133923	0.0255365
ENSG00000204681.10	GABBR1	protein_coding	gamma-aminobutyric acid type B receptor subunit 1 [Source:HGNC Symbol;Acc:HGNC:4070]	2105.51	2105.36	2879.34	3313.92	3385.54	2408.69	106.968	119.713	51.6681	50.654	33.6828	43.1043	2.04	2.24	0.97	0.97	0.63	0.81	67.596	-1.10582	0.344777	-3.20735	0.00133963	0.0255365
ENSG00000246792.2	AC106038.1	antisense_RNA		2199.97	2131.54	2399.77	2194.85	2279.73	2313.17	279.63	337.482	252.675	197.269	219.278	185.232	6.28	7.44	5.56	4.45	4.87	4.07	245.277	-0.531903	0.165893	-3.2063	0.00134453	0.0255928
ENSG00000124225.15	PMEPA1	protein_coding	prostate transmembrane protein, androgen induced 1 [Source:HGNC Symbol;Acc:HGNC:14107]	2237.27	2919.62	2986.32	2885.26	2389.77	2533.14	1778.4	1602.98	1519.23	1132.67	1395.86	1395.8	34.01	30.1	28.46	21.76	26.42	26.16	1470.8	-0.320457	0.100026	-3.20375	0.00135651	0.0257219
ENSG00000127481.14	UBR4	protein_coding	ubiquitin protein ligase E3 component n-recognin 4 [Source:HGNC Symbol;Acc:HGNC:30313]	5431.46	6384.24	5899.38	5766.42	4961.28	5223.07	6045.07	4996.5	5184.56	5971.61	6639.83	6894.84	54.68	44.35	45.92	54.21	59.38	61.08	5955.38	0.265435	0.082855	3.20361	0.00135719	0.0257219
ENSG00000133119.12	RFC3	protein_coding	replication factor C subunit 3 [Source:HGNC Symbol;Acc:HGNC:9971]	2223.54	2216.37	2212.72	2210.37	2205.7	2213.71	2331.17	2436.46	2541.53	2183.18	2077.14	1880.24	53.25	54.62	56.85	50.06	46.91	42.07	2241.63	-0.25293	0.0789459	-3.20385	0.00135605	0.0257219
ENSG00000086061.15	DNAJA1	protein_coding	DnaJ heat shock protein family (Hsp40) member A1 [Source:HGNC Symbol;Acc:HGNC:5229]	2184.39	2182.82	2183.13	2179.27	2175.36	2178.66	10250.2	11754.3	11758	12599.1	13313.6	13320.5	237.7	267.52	266.99	293.28	305.28	302.58	12165.9	0.216645	0.06767	3.20149	0.00136719	0.0258307
ENSG00000103326.11	CAPN15	protein_coding	calpain 15 [Source:HGNC Symbol;Acc:HGNC:11182]	2850.3	2770.25	2754.14	3076.29	2945.45	2971.95	2021.74	1546.18	1589.5	1321.29	1349.2	1430.09	35.34	26.53	27.21	23.19	23.33	24.49	1542.98	-0.330943	0.103371	-3.2015	0.00136714	0.0258307
ENSG00000139514.12	SLC7A1	protein_coding	solute carrier family 7 member 1 [Source:HGNC Symbol;Acc:HGNC:11057]	7042.94	7115.57	7127.57	7063.66	7165.2	7164.97	4672.13	4351.54	4607.94	3908.85	3797.9	4108.7	33.22	30.36	32.08	27.9	26.7	28.61	4241.19	-0.205925	0.0643286	-3.20115	0.00136882	0.0258307
ENSG00000076108.11	BAZ2A	protein_coding	bromodomain adjacent to zinc finger domain 2A [Source:HGNC Symbol;Acc:HGNC:962]	5448.32	5612.08	5546.53	5330.72	5668.53	5606.63	5183.32	4884.84	4800.79	5785.48	5743.85	5510.64	47.37	43.81	42.96	53.06	51.89	49.33	5318.09	0.19579	0.0611816	3.20015	0.00137355	0.025853
ENSG00000111801.15	BTN3A3	protein_coding	butyrophilin subfamily 3 member A3 [Source:HGNC Symbol;Acc:HGNC:1140]	1499.69	2114.87	2469.18	2385.7	1664	2285.22	78.5773	76.3198	44.9399	119.142	148.119	100.38	1.96	1.85	1.1	2.97	3.63	2.46	94.562	0.887214	0.277248	3.20007	0.00137395	0.025853
ENSG00000118181.10	RPS25	protein_coding	ribosomal protein S25 [Source:HGNC Symbol;Acc:HGNC:10413]	637.751	628.657	634.023	632.754	632.293	634.261	22257.4	25331	26080.4	20987.9	21542.6	21022.5	1777.25	1985.1	2039.1	1682.2	1700.85	1644.35	22870.4	-0.213216	0.0666607	-3.19853	0.00138129	0.025954
ENSG00000134258.16	VTCN1	protein_coding	V-set domain containing T-cell activation inhibitor 1 [Source:HGNC Symbol;Acc:HGNC:28873]	2293.84	2346.6	2368.99	2340.77	2301.72	2310.65	696.618	980.827	889.374	959.07	1240.68	1225.58	15.14	20.92	18.93	20.92	26.66	26.09	998.693	0.417084	0.130448	3.19733	0.00138707	0.0259883
ENSG00000260260.1	SNHG19	lincRNA	small nucleolar RNA host gene 19 [Source:HGNC Symbol;Acc:HGNC:49574]	164.62	157.99	161.01	161.97	161.42	161.29	339.683	314.774	329.541	230.133	207.168	266.405	106.44	96.81	101.11	72.39	64.19	81.77	281.285	-0.476784	0.149116	-3.19741	0.00138669	0.0259883
ENSG00000198373.12	WWP2	protein_coding	WW domain containing E3 ubiquitin protein ligase 2 [Source:HGNC Symbol;Acc:HGNC:16804]	3352.68	3489.91	3510.42	3276.01	3371.64	3348.22	3089.8	2771.63	2718.47	3367.93	3211.07	3535.81	46.07	40.57	39.7	50.42	47.35	51.67	3115.79	0.238443	0.0746098	3.19587	0.00139409	0.0260826
ENSG00000151240.16	DIP2C	protein_coding	disco interacting protein 2 homolog C [Source:HGNC Symbol;Acc:HGNC:29150]	7326.63	7248.99	7257.99	7439.56	7446.94	7148.31	1431.8	1303.75	1274.82	1127.53	1067.38	1126.86	9.91	8.85	8.64	7.83	7.3	7.64	1222.05	-0.271481	0.0850889	-3.19055	0.00142001	0.0265298
ENSG00000067113.16	PLPP1	protein_coding	phospholipid phosphatase 1 [Source:HGNC Symbol;Acc:HGNC:9228]	1415.77	1307.91	1319.04	1412.73	1273.14	1357.58	90.3613	142.321	118.924	160.785	222.041	184.726	3.39	5.23	4.38	6.08	8.23	6.81	153.201	0.693085	0.217285	3.18974	0.00142399	0.0265605
ENSG00000171953.15	ATPAF2	protein_coding	ATP synthase mitochondrial F1 complex assembly factor 2 [Source:HGNC Symbol;Acc:HGNC:18802]	1111.17	1067.83	1125.52	925.386	943.211	1028.9	567.352	519.494	530.362	721.605	669.101	651.333	27.85	25	25.47	35.54	32.46	31.3	609.873	0.334354	0.104833	3.1894	0.0014257	0.0265605
ENSG00000062038.13	CDH3	protein_coding	cadherin 3 [Source:HGNC Symbol;Acc:HGNC:1762]	2730.06	2772.86	2658.71	2569.37	2696.3	2700.01	3277.14	3091.91	3152.83	3637.07	3579.33	3710.81	61.67	57.09	58.09	68.69	66.6	68.4	3408.17	0.1987	0.062354	3.18664	0.00143934	0.0267766
ENSG00000116871.15	MAP7D1	protein_coding	MAP7 domain containing 1 [Source:HGNC Symbol;Acc:HGNC:25514]	2104.59	1850.27	1776.82	1903.45	1833.81	1916.39	1194.18	1217.15	1203.45	1347.56	1603.16	1433.48	31.87	31.89	31.44	36.1	42.29	37.47	1333.15	0.276362	0.0868252	3.18297	0.00145773	0.0270804
ENSG00000180263.13	FGD6	protein_coding	FYVE, RhoGEF and PH domain containing 6 [Source:HGNC Symbol;Acc:HGNC:21740]	8258.77	7737.42	8644.1	8317.09	8275.17	7618.55	418.814	563.387	486.648	626.227	645.482	648.805	2.6	3.44	2.97	3.91	3.97	3.95	564.906	0.390236	0.122658	3.18149	0.00146522	0.027181
ENSG00000080561.13	MID2	protein_coding	midline 2 [Source:HGNC Symbol;Acc:HGNC:7096]	2114.06	2001.33	2128.19	2069.33	1936.63	2021.95	417.299	496.463	499.122	557.179	664.732	624.268	10.32	12.06	12.09	13.84	16.26	15.13	543.167	0.384614	0.120943	3.18012	0.00147212	0.0272705
ENSG00000147604.13	RPL7	protein_coding	ribosomal protein L7 [Source:HGNC Symbol;Acc:HGNC:10363]	641.372	646.184	636.088	644.67	642.568	635.728	27116.2	29699.2	31660.8	23938.3	25602.5	26475.1	2138.83	2299.1	2445.28	1895.3	1996.8	2045.63	27415.4	-0.219051	0.0689145	-3.17859	0.00147992	0.0273764
ENSG00000178607.15	ERN1	protein_coding	endoplasmic reticulum to nucleus signaling 1 [Source:HGNC Symbol;Acc:HGNC:3449]	6078.5	6522.67	6644.95	6575.2	6255.66	6301.24	1797.57	1767.95	1654.06	1935.69	2192.14	2073.42	14.22	13.72	12.81	15.36	17.15	16.07	1903.49	0.248491	0.0781872	3.17815	0.00148218	0.0273797
ENSG00000163644.14	PPM1K	protein_coding	protein phosphatase, Mg2+/Mn2+ dependent 1K [Source:HGNC Symbol;Acc:HGNC:25415]	3209.56	3839.16	3524.77	3606	3757.39	3477.85	1014.49	871.747	805.076	1337.62	1129.35	1020.09	14.39	12.15	11.19	19.05	15.86	14.17	1029.7	0.373241	0.11746	3.17761	0.00148495	0.0273923
ENSG00000075790.10	BCAP29	protein_coding	B-cell receptor associated protein 29 [Source:HGNC Symbol;Acc:HGNC:24131]	1029.04	1095.17	1097.21	943.071	1015.43	878.306	1199.16	1334.99	1302.05	1504.45	1464.62	1651.2	60.26	65.82	64.07	75.91	72.76	81.24	1409.41	0.270144	0.0850742	3.17539	0.00149634	0.0275637
ENSG00000145284.11	SCD5	protein_coding	stearoyl-CoA desaturase 5 [Source:HGNC Symbol;Acc:HGNC:21088]	2910.91	2909.22	2908.78	2912.45	2907.04	2894.61	1367.13	1263.54	1240.99	1129.24	1057.73	1012.28	23.78	21.57	21.14	19.72	18.19	17.25	1178.49	-0.276273	0.0870343	-3.17429	0.00150201	0.0276075
ENSG00000184205.14	TSPYL2	protein_coding	TSPY like 2 [Source:HGNC Symbol;Acc:HGNC:24358]	2200.59	2524.8	2212.09	2082.85	2255.76	2337.86	750.555	717.574	583.653	961.494	909.307	793.677	16.75	15.72	12.76	21.54	20.08	17.36	786.028	0.3757	0.118364	3.17412	0.00150292	0.0276075
ENSG00000165891.15	E2F7	protein_coding	E2F transcription factor 7 [Source:HGNC Symbol;Acc:HGNC:23820]	4675.23	5137.69	5460.67	5155.79	5166.68	4672.14	808.994	746.404	708.645	637.062	561.441	595.217	8.12	7.35	6.97	6.42	5.57	5.85	676.296	-0.333362	0.105046	-3.1735	0.00150613	0.0276279
ENSG00000196172.9	ZNF681	protein_coding	zinc finger protein 681 [Source:HGNC Symbol;Acc:HGNC:26457]	4586.81	5348.96	4250.33	6315.74	4681.07	6314.97	339.663	317.506	394.182	238.22	295.218	216.684	3.32	3.04	3.77	2.33	2.85	2.07	300.27	-0.503087	0.158611	-3.17183	0.0015148	0.0277481
ENSG00000111445.13	RFC5	protein_coding	replication factor C subunit 5 [Source:HGNC Symbol;Acc:HGNC:9973]	1554.48	1517.96	1598.28	1601.61	1541.86	1555.93	1387.71	1344.91	1384.13	1129.08	1196.46	1142.6	44.94	42.75	43.89	36.72	38.32	36.25	1264.15	-0.249173	0.0786492	-3.16816	0.00153407	0.0280619
ENSG00000113161.15	HMGCR	protein_coding	3-hydroxy-3-methylglutaryl-CoA reductase [Source:HGNC Symbol;Acc:HGNC:5006]	3121.07	3628.23	3465.9	3556.45	3321.14	3194.4	2995.76	2538.71	2953.38	3267.7	3262.51	3604.9	44.85	37.32	43.3	49.14	48.32	52.88	3103.82	0.256419	0.080949	3.16766	0.00153671	0.0280712
ENSG00000089123.15	TASP1	protein_coding	taspase 1 [Source:HGNC Symbol;Acc:HGNC:15859]	1944.83	1940.58	1973.85	2103.35	2058.34	2066.38	508.64	554.885	495.537	370.254	437.033	390.784	12.78	13.67	12.19	9.33	10.85	9.62	459.523	-0.3817	0.120555	-3.1662	0.00154445	0.0281692
ENSG00000177508.11	IRX3	protein_coding	iroquois homeobox 3 [Source:HGNC Symbol;Acc:HGNC:14360]	1504.69	1188.07	1200.36	1328.43	1443.61	1322.74	1596.58	1567.13	1658.59	1444.84	1202.93	1339.03	60.88	58.62	61.93	55.28	45.35	50.01	1468.2	-0.274027	0.0865575	-3.16584	0.00154637	0.0281692
ENSG00000124145.6	SDC4	protein_coding	syndecan 4 [Source:HGNC Symbol;Acc:HGNC:10661]	2434.54	2427.37	2430.72	2431.74	2431.2	2430.97	2878.46	3069.48	3124.92	3324.24	3653.27	3585.02	59.87	62.66	63.65	69.41	75.14	73.05	3272.56	0.219064	0.0692184	3.16482	0.00155178	0.0282287
ENSG00000105404.10	RABAC1	protein_coding	Rab acceptor 1 [Source:HGNC Symbol;Acc:HGNC:9794]	637.082	625.622	633.409	635.225	628.44	633.395	541.371	586.183	487.302	673.603	706.614	668.478	43.31	46.02	38.17	54.08	55.89	52.38	610.591	0.344878	0.108999	3.16405	0.00155592	0.0282648
ENSG00000135111.15	TBX3	protein_coding	T-box 3 [Source:HGNC Symbol;Acc:HGNC:11602]	3709.73	3995.13	4384.89	3754.42	3743.5	3814.63	395.031	355.556	341.112	441.217	478.665	516.052	5.13	4.53	4.34	5.75	6.14	6.57	421.289	0.399141	0.126205	3.16263	0.00156351	0.02833
ENSG00000197747.8	S100A10	protein_coding	S100 calcium binding protein A10 [Source:HGNC Symbol;Acc:HGNC:10487]	482.251	482.867	468.366	475.04	475.567	475.75	3692.07	3977.93	4437.15	4720.2	4721.5	4817.13	391.71	414.22	460.96	502.7	495.32	500.65	4394.31	0.235792	0.0745636	3.16229	0.00156534	0.02833
ENSG00000261740.6	BOLA2-SMG1P6	protein_coding	BOLA2-SMG1P6 readthrough [Source:HGNC Symbol;Acc:HGNC:53563]	863.586	852.916	847.984	859.095	850.302	857.599	1510.65	1664.36	1705.55	1363.64	1358.86	1371.66	89.33	96.59	98.73	80.96	79.42	79.44	1495.98	-0.252998	0.0800076	-3.16217	0.00156598	0.02833
ENSG00000004139.13	SARM1	protein_coding	sterile alpha and TIR motif containing 1 [Source:HGNC Symbol;Acc:HGNC:17074]	3074.61	3330.95	3580.16	2601.61	3571.53	2854.54	275.092	275.157	213.54	380.852	322.574	359.355	4.42	4.35	3.36	6.13	5.12	5.67	304.411	0.481121	0.152211	3.16087	0.00157297	0.0283783
ENSG00000140264.19	SERF2	protein_coding	small EDRK-rich factor 2 [Source:HGNC Symbol;Acc:HGNC:10757]	590.878	609.237	610.326	577.665	593.599	588.899	11753.4	10437.7	10722.8	12429.1	12372.6	12952.8	998.92	870.65	892.37	1060.38	1039.71	1078.37	11778	0.197904	0.0626041	3.16121	0.00157117	0.0283783
ENSG00000111961.17	SASH1	protein_coding	SAM and SH3 domain containing 1 [Source:HGNC Symbol;Acc:HGNC:19182]	5770.99	7435.71	6840.93	7067.37	7529.2	7528.97	300.678	207.978	237.528	203.234	138.86	132.886	2.17	1.48	1.68	1.47	0.99	0.94	203.486	-0.652614	0.206536	-3.15981	0.00157871	0.0284428
ENSG00000125703.14	ATG4C	protein_coding	autophagy related 4C cysteine peptidase [Source:HGNC Symbol;Acc:HGNC:16040]	1874.91	1824.78	2188.7	1963.81	1825.36	2164.98	309.61	327.494	257.775	226.107	214.73	187.853	7.95	8.26	6.49	5.83	5.45	4.73	253.927	-0.509951	0.161427	-3.15903	0.00158296	0.0284803
ENSG00000167566.16	NCKAP5L	protein_coding	NCK associated protein 5 like [Source:HGNC Symbol;Acc:HGNC:29321]	4294.84	4345.83	4328.87	4337.14	4165.21	4396.82	927.196	788.968	809.532	987.755	1087.7	1053.06	10.88	9.08	9.3	11.63	12.61	12.09	942.354	0.306708	0.0971201	3.15803	0.0015884	0.0285391
ENSG00000114346.13	ECT2	protein_coding	epithelial cell transforming 2 [Source:HGNC Symbol;Acc:HGNC:3155]	3399.13	3426.72	3308.97	3509.23	3622.48	3267.03	3422.96	3432.14	3764.02	3175.86	2857.37	3041.5	50.6	49.8	54.48	47.13	41.78	44.05	3282.29	-0.226488	0.0717403	-3.15706	0.0015937	0.0285951
ENSG00000164134.12	NAA15	protein_coding	N(alpha)-acetyltransferase 15, NatA auxiliary subunit [Source:HGNC Symbol;Acc:HGNC:30782]	4665.76	4492.23	4658.67	4252.12	4178.47	4501.29	2877.93	3438.76	3549.69	2828.15	2782.82	2545.12	32.67	38.31	39.46	32.23	31.25	28.29	3003.75	-0.27527	0.0872048	-3.15659	0.00159627	0.0286021
ENSG00000116205.12	TCEANC2	protein_coding	transcription elongation factor A N-terminal and central domain containing 2 [Source:HGNC Symbol;Acc:HGNC:26494]	4063.06	4283.33	3765.85	4628.54	4260.27	4925.73	388.246	417.919	439.153	298.779	350.824	274.834	4.56	4.82	5.05	3.53	4.08	3.17	361.547	-0.434519	0.13785	-3.15211	0.00162093	0.0290044
ENSG00000170315.13	UBB	protein_coding	ubiquitin B [Source:HGNC Symbol;Acc:HGNC:12463]	576.286	588.065	593.278	589.406	587.811	589.902	19469.7	18610.1	18542.4	20723.5	21881	21078.3	1675.98	1572.22	1562.9	1790.64	1862.44	1777.35	20050.8	0.169319	0.0537355	3.15098	0.00162725	0.0290779
ENSG00000196550.10	FAM72A	protein_coding	family with sequence similarity 72 member A [Source:HGNC Symbol;Acc:HGNC:24044]	2006.41	1980	2074.94	2076.19	2017.99	1941.26	631.669	733.531	715.82	547.562	555.081	547.833	15.85	18.06	17.6	13.8	13.76	13.46	621.92	-0.334009	0.106057	-3.14934	0.00163639	0.0292016
ENSG00000103811.15	CTSH	protein_coding	cathepsin H [Source:HGNC Symbol;Acc:HGNC:2535]	748.115	716.242	717.638	740.264	723.598	723.175	2336.9	2417.48	2560.56	2728.32	2787.84	3153.58	162.31	164.78	174.14	190.22	191.47	214.56	2664.1	0.246144	0.0782185	3.14687	0.00165028	0.0294095
ENSG00000203668.2	CHML	protein_coding	CHM like, Rab escort protein 2 [Source:HGNC Symbol;Acc:HGNC:1941]	6503.96	6979.3	6841.27	6843.27	6877.95	6728.06	1420.48	1582.69	1668.74	1165.81	1331.88	1326.25	10.58	11.55	12.16	8.71	9.8	9.68	1415.94	-0.28866	0.0917488	-3.1462	0.00165407	0.029437
ENSG00000125651.13	GTF2F1	protein_coding	general transcription factor IIF subunit 1 [Source:HGNC Symbol;Acc:HGNC:4652]	2364.13	2355.17	2480.82	2346.81	2378.14	2362.04	2294.19	2155.49	2034.36	2434.83	2548.77	2643.47	48.73	44.93	42.31	51.91	53.52	55	2351.84	0.234876	0.0747441	3.1424	0.00167567	0.0297811
ENSG00000113356.11	POLR3G	protein_coding	RNA polymerase III subunit G [Source:HGNC Symbol;Acc:HGNC:30075]	1778.45	1784.46	1575.84	1582.07	1728.63	1645.26	241.05	265.641	298.614	212.23	185.733	156.819	7.26	7.84	8.8	6.42	5.53	4.63	226.676	-0.543062	0.172911	-3.1407	0.00168543	0.0299142
ENSG00000112183.14	RBM24	protein_coding	RNA binding motif protein 24 [Source:HGNC Symbol;Acc:HGNC:21539]	2483.43	2380.07	2114.82	1951.37	2144.09	2051.48	194.568	177.446	211.182	295.237	244.889	284.669	4.51	4.04	4.8	6.87	5.62	6.47	234.659	0.50041	0.159396	3.13941	0.00169287	0.0300055
ENSG00000168785.7	TSPAN5	protein_coding	tetraspanin 5 [Source:HGNC Symbol;Acc:HGNC:17753]	3118.58	3192.04	2991.27	2893.58	3065.4	3121.86	369.575	372.816	435.552	544.608	518.882	480.705	6.11	6.04	7.04	9.03	8.47	7.77	453.685	0.386824	0.12344	3.1337	0.0017262	0.0305551
ENSG00000197555.9	SIPA1L1	protein_coding	signal induced proliferation associated 1 like 1 [Source:HGNC Symbol;Acc:HGNC:20284]	3613.92	3429.67	3573.17	3390.92	3608.64	3389.92	3875.18	4481.11	4199.41	5013.99	4724.11	4869.56	55.99	63.55	59.42	72.72	67.5	68.91	4527.21	0.219025	0.0699083	3.13304	0.00173006	0.0305822
ENSG00000155363.18	MOV10	protein_coding	Mov10 RISC complex RNA helicase [Source:HGNC Symbol;Acc:HGNC:7200]	1676.83	1686.52	1682.76	1814.14	1762.65	1829.82	3248.3	3109.93	2880.39	3593.12	3712.18	3458.19	94.33	88.65	81.92	104.74	106.61	98.39	3333.68	0.219947	0.0702718	3.12995	0.00174835	0.030864
ENSG00000135404.11	CD63	protein_coding	CD63 molecule [Source:HGNC Symbol;Acc:HGNC:1692]	678.611	671.033	677.687	675.623	677.48	683.771	9332.44	10187.9	9689.17	10752.8	11470.9	11008	696.7	746.45	708.27	805.78	846.75	805.01	10406.9	0.18607	0.0594676	3.12893	0.00175443	0.0308883
ENSG00000154358.20	OBSCN	protein_coding	obscurin, cytoskeletal calmodulin and titin-interacting RhoGEF [Source:HGNC Symbol;Acc:HGNC:15719]	7391.5	7857.16	5982.28	6167.65	8839.3	8843.62	350.798	295.494	304.518	278.061	187.627	148.801	2.41	1.97	2.02	1.93	1.26	1.01	260.771	-0.632643	0.202185	-3.12903	0.00175386	0.0308883
ENSG00000020129.15	NCDN	protein_coding	neurochondrin [Source:HGNC Symbol;Acc:HGNC:17597]	3102.11	3023.39	3130.39	2986.68	3016.81	3098	1823.68	1649.66	1676.01	1915.81	2059.05	2130.84	30.15	26.76	27.13	31.79	33.65	34.5	1875.84	0.245727	0.0786287	3.12516	0.00177707	0.031245
ENSG00000082781.11	ITGB5	protein_coding	integrin subunit beta 5 [Source:HGNC Symbol;Acc:HGNC:6160]	2131.04	2478.39	2717.85	2116.13	2448.44	2143.55	1808.19	1685.14	1694.5	1962.48	1954.22	2377.04	39.27	35.91	36.02	42.78	41.97	50.57	1913.61	0.280982	0.0899382	3.12416	0.00178312	0.0313094
ENSG00000115380.19	EFEMP1	protein_coding	EGF containing fibulin like extracellular matrix protein 1 [Source:HGNC Symbol;Acc:HGNC:3218]	2011.76	1982.09	1967.18	1941.6	1901.47	1969.59	874.424	763.75	810.769	1259.34	905.286	1004.82	22.53	19.32	20.46	32.58	23.07	25.36	936.408	0.37268	0.119326	3.12321	0.00178891	0.0313693
ENSG00000105223.19	PLD3	protein_coding	phospholipase D family member 3 [Source:HGNC Symbol;Acc:HGNC:17158]	1130.89	1119.95	1140.4	1141.79	1141.43	1140.87	3131.48	2763.59	2797.68	3194.58	3478.95	3582.91	139.42	120.76	121.96	142.76	153.16	156.25	3158.19	0.238484	0.0763708	3.12271	0.00179196	0.0313808
ENSG00000165304.7	MELK	protein_coding	maternal embryonic leucine zipper kinase [Source:HGNC Symbol;Acc:HGNC:16870]	2043.25	2093.47	1997.94	2075.12	2024.17	2049.59	1240.89	1276.26	1455.86	1172.14	1008.38	1046.61	30.65	30.94	35.22	29.06	24.63	25.33	1200.03	-0.300127	0.0961995	-3.11984	0.00180948	0.0316454
ENSG00000172167.7	MTBP	protein_coding	MDM2 binding protein [Source:HGNC Symbol;Acc:HGNC:7417]	2459.9	2442.41	2609.53	2560.34	2576.81	2571.34	325.52	317.628	297.051	244.748	233.078	208.633	6.49	6.22	5.8	4.89	4.6	4.08	271.097	-0.456024	0.146195	-3.11928	0.00181292	0.0316634
ENSG00000105619.13	TFPT	protein_coding	TCF3 fusion partner [Source:HGNC Symbol;Acc:HGNC:13630]	778.528	787.446	770.498	771.821	714.492	726.907	708.036	549.523	650	730.984	846.317	896.597	47.26	36.02	42.46	48.94	55.82	58.62	730.237	0.373342	0.119815	3.116	0.00183322	0.0319754
ENSG00000042088.13	TDP1	protein_coding	tyrosyl-DNA phosphodiesterase 1 [Source:HGNC Symbol;Acc:HGNC:18884]	1743.19	1739.18	1868.13	1837.42	1806.77	1724.01	1034.29	1002.74	1002.07	860.316	812.572	845.97	29.28	27.87	27.79	24.45	22.75	23.46	926.331	-0.270095	0.0867001	-3.11528	0.00183769	0.032011
ENSG00000156453.13	PCDH1	protein_coding	protocadherin 1 [Source:HGNC Symbol;Acc:HGNC:8655]	3662.65	3593.82	3302.06	3485.01	3515.16	3762.91	400.823	367.157	390.859	515.546	528.735	461.646	5.71	5.13	5.45	7.37	7.45	6.44	444.139	0.373007	0.119754	3.11477	0.00184088	0.032024
ENSG00000132274.15	TRIM22	protein_coding	tripartite motif containing 22 [Source:HGNC Symbol;Acc:HGNC:16379]	1689.64	1863.05	1127.77	1298.7	1721.42	1521.81	96.5197	170.417	136.48	199.237	293.65	180.48	3.22	5.57	4.45	6.67	9.69	5.9	179.465	0.739431	0.237582	3.11231	0.00185628	0.0322492
ENSG00000161800.12	RACGAP1	protein_coding	Rac GTPase activating protein 1 [Source:HGNC Symbol;Acc:HGNC:9804]	1934.2	1945.66	1975.02	1928.7	1938.78	1963.77	4149.74	4021.69	4356.88	3837.27	3534.93	3427.37	107.73	102.49	110.75	100	90.75	87.18	3887.97	-0.214997	0.0691188	-3.11054	0.00186745	0.0324003
ENSG00000136141.14	LRCH1	protein_coding	leucine rich repeats and calponin homology domain containing 1 [Source:HGNC Symbol;Acc:HGNC:20309]	4444.91	4428.22	4426.4	4449.48	4469.79	4425.56	1206.7	1286.18	1345.98	1089.39	1017.38	1084.3	13.74	14.37	15.01	12.45	11.45	12.09	1171.66	-0.265568	0.0853906	-3.11004	0.0018706	0.0324122
ENSG00000104427.11	ZC2HC1A	protein_coding	zinc finger C2HC-type containing 1A [Source:HGNC Symbol;Acc:HGNC:24277]	1579.55	1697.8	1797.81	2278.15	1519.63	1978.27	297.524	273.722	261.736	192.588	226.809	174.525	8.4	7.58	7.24	5.45	6.33	4.83	237.812	-0.501415	0.161299	-3.1086	0.00187978	0.0324429
ENSG00000151929.9	BAG3	protein_coding	BCL2 associated athanogene 3 [Source:HGNC Symbol;Acc:HGNC:939]	2313.52	2324.31	2333.61	2324.21	2321.08	2310.27	5421.92	5064.46	5393.82	5847.53	5953.34	6490.35	118.12	108.29	115.06	127.88	128.24	138.51	5695.21	0.204076	0.0656451	3.10878	0.00187859	0.0324429
ENSG00000159461.14	AMFR	protein_coding	autocrine motility factor receptor [Source:HGNC Symbol;Acc:HGNC:463]	2502.1	2597.07	2609.82	2635.98	2737.3	2643.36	5223.9	5057.86	4923.92	5575.24	5761.19	5994.82	100.83	95.81	93.05	108.01	109.95	113.35	5422.82	0.189091	0.0608217	3.10894	0.00187763	0.0324429
ENSG00000050405.13	LIMA1	protein_coding	LIM domain and actin binding 1 [Source:HGNC Symbol;Acc:HGNC:24636]	3066.48	3163.6	2975.14	3295.63	3123.72	3331.96	327.873	360.674	433.057	486.793	519.512	486.776	5.25	5.67	6.79	7.83	8.23	7.64	435.766	0.40951	0.131881	3.10516	0.00190177	0.0327793
ENSG00000179104.8	TMTC2	protein_coding	transmembrane and tetratricopeptide repeat containing 2 [Source:HGNC Symbol;Acc:HGNC:25440]	4572.7	4192.87	4763.37	4889.71	4713.74	5164.92	612.777	647.378	612.233	487.085	493.118	511.348	6.58	6.82	6.44	5.25	5.24	5.39	560.651	-0.324873	0.104642	-3.10461	0.00190528	0.0327968
ENSG00000108176.14	DNAJC12	protein_coding	DnaJ heat shock protein family (Hsp40) member C12 [Source:HGNC Symbol;Acc:HGNC:28908]	994.446	993.491	991.665	990.225	1001.84	992.692	793.155	809.425	843.86	1037.53	1064.15	911.957	40.34	40.42	42.03	52.98	53.53	45.44	910.013	0.297514	0.0958705	3.10329	0.00191381	0.0328575
ENSG00000116863.10	ADPRHL2	protein_coding	ADP-ribosylhydrolase like 2 [Source:HGNC Symbol;Acc:HGNC:21304]	1489.54	1482.37	1485.72	1486.74	1486.2	1485.97	730.249	712.178	674.294	820.448	874.607	900.98	24.85	23.78	22.47	28.02	29.43	30.03	785.457	0.295676	0.0952762	3.10336	0.00191337	0.0328575
ENSG00000131368.7	MRPS25	protein_coding	mitochondrial ribosomal protein S25 [Source:HGNC Symbol;Acc:HGNC:14511]	1394.11	1388.59	1264.6	1449.04	1380.93	1322.92	2996.02	2829.84	3069.4	2404.36	2583.91	2650.47	110.94	102.87	111.3	89.38	94.62	96.16	2755.66	-0.219995	0.0709058	-3.10263	0.00191807	0.0328876
ENSG00000116793.15	PHTF1	protein_coding	putative homeodomain transcription factor 1 [Source:HGNC Symbol;Acc:HGNC:8939]	1809.33	1816.03	1898.11	1991.64	1813.71	1833.26	1191.87	1299.14	1252.65	1479.3	1529.76	1434.68	32.42	34.68	33.36	40.38	41.14	38.22	1364.56	0.246486	0.0795204	3.09966	0.00193742	0.0331761
ENSG00000198755.10	RPL10A	protein_coding	ribosomal protein L10a [Source:HGNC Symbol;Acc:HGNC:10299]	550.587	543.055	545.229	548.563	548.221	546.309	16358	15740.8	15987.6	13904	14162	14768.6	1512.19	1428.18	1447.19	1290.23	1294.63	1337.39	15153.5	-0.166818	0.0538588	-3.09732	0.00195279	0.0333957
ENSG00000096063.15	SRPK1	protein_coding	SRSF protein kinase 1 [Source:HGNC Symbol;Acc:HGNC:11305]	3567.43	3680.41	3390.45	3735.42	3794.75	3736.06	3174.46	3201.9	3713.07	3038.65	2683.07	2730.86	44	43.56	50.4	42.29	36.78	37.09	3090.31	-0.255278	0.082547	-3.09251	0.0019847	0.033849
ENSG00000118898.15	PPL	protein_coding	periplakin [Source:HGNC Symbol;Acc:HGNC:9273]	5893.35	5767.35	5908.44	5586.36	5670.16	5660.46	1943.48	1807.36	1767.66	2197.02	2021.08	2328.35	17.11	15.62	15.24	19.41	17.58	20.07	2010.78	0.247414	0.0800331	3.0914	0.00199218	0.033849
ENSG00000124207.16	CSE1L	protein_coding	chromosome segregation 1 like [Source:HGNC Symbol;Acc:HGNC:2431]	3284.79	3272.9	3276.24	3289.7	3293.68	3293.84	11767.7	12404.1	13293.2	11245.9	10558.9	10921.8	181.13	187.39	200.35	173.76	160.71	164.68	11698.6	-0.195095	0.0631004	-3.09182	0.0019893	0.033849
ENSG00000151849.14	CENPJ	protein_coding	centromere protein J [Source:HGNC Symbol;Acc:HGNC:17272]	2957.35	2484.27	3152.37	3003.51	3469.96	3028.06	706.095	787.066	560.807	578.653	450.431	490.594	11.89	13.01	9.26	9.78	7.51	8.1	595.587	-0.430164	0.139135	-3.0917	0.00199011	0.033849
ENSG00000163993.6	S100P	protein_coding	S100 calcium binding protein P [Source:HGNC Symbol;Acc:HGNC:10504]	443.22	325.037	311.319	316.681	400.33	361.767	125.211	144.199	172.235	202.045	216.969	234.3	17.75	20.06	23.92	28.77	30.42	32.54	182.494	0.57169	0.184865	3.09248	0.00198492	0.033849
ENSG00000135148.11	TRAFD1	protein_coding	TRAF-type zinc finger domain containing 1 [Source:HGNC Symbol;Acc:HGNC:24808]	2248.93	2190.77	2204.57	2310.13	2212.14	2299.54	3050.28	3497.66	3418.11	3700.41	4003.4	3951.55	68.74	77.36	75.42	83.7	89.2	87.24	3603.55	0.226074	0.0731431	3.09085	0.00199588	0.03386
ENSG00000182004.12	SNRPE	protein_coding	small nuclear ribonucleoprotein polypeptide E [Source:HGNC Symbol;Acc:HGNC:11161]	446.26	441.958	421.973	427.099	442.328	441.116	4114.29	4772.51	4990.41	4066.64	3888.58	3758.36	476.42	542.33	565.77	472.68	445.22	426.3	4265.14	-0.24477	0.0792001	-3.09053	0.00199798	0.03386
ENSG00000168769.13	TET2	protein_coding	tet methylcytosine dioxygenase 2 [Source:HGNC Symbol;Acc:HGNC:25941]	9319.99	9327.65	9352.5	9194.55	9276.01	9398.5	4508.71	4322.77	4480.15	5643.46	4834.41	5024.34	24.48	23.04	23.82	30.77	25.96	26.73	4802.3	0.219733	0.0711424	3.08863	0.00201079	0.0340331
ENSG00000103599.19	IQCH	protein_coding	IQ motif containing H [Source:HGNC Symbol;Acc:HGNC:25721]	1898.11	1572.18	1756.62	1953.52	2196.34	2265.86	131.246	216.47	153.945	121.778	82.5796	94.3957	3.45	5.59	3.96	3.21	2.15	2.43	133.379	-0.739426	0.239494	-3.08745	0.0020188	0.0341247
ENSG00000114631.10	PODXL2	protein_coding	podocalyxin like 2 [Source:HGNC Symbol;Acc:HGNC:17936]	2007.54	2000.37	2003.72	2004.74	2004.2	2003.97	914.036	892.199	848.598	712.067	722.574	743.314	23.06	22.09	20.97	18.03	18.03	18.37	805.468	-0.284468	0.0921629	-3.08658	0.00202472	0.0341809
ENSG00000172465.13	TCEAL1	protein_coding	transcription elongation factor A like 1 [Source:HGNC Symbol;Acc:HGNC:11616]	951.391	926.117	949.452	939.105	949.308	929.924	885.763	1076.19	1030.66	1266.84	1188.27	1206.48	47.61	56.76	54.23	68.35	63.15	63.52	1109.03	0.292487	0.0949112	3.08169	0.00205827	0.0347025
ENSG00000155961.4	RAB39B	protein_coding	RAB39B, member RAS oncogene family [Source:HGNC Symbol;Acc:HGNC:16499]	3326.54	3319.37	3322.72	3323.74	3323.2	3322.97	233.184	260.884	256.131	331.911	351.203	325.907	3.55	3.9	3.82	5.07	5.28	4.86	293.202	0.426466	0.1385	3.07918	0.0020757	0.0349516
ENSG00000070404.9	FSTL3	protein_coding	follistatin like 3 [Source:HGNC Symbol;Acc:HGNC:3973]	1908.18	2041.33	2063.2	2026.23	2169.36	2073.58	462.628	451.861	346.46	304.767	289.293	325.513	11.44	10.96	8.39	7.56	7.07	7.88	363.423	-0.449892	0.146186	-3.07753	0.0020872	0.0350517
ENSG00000108591.9	DRG2	protein_coding	developmentally regulated GTP binding protein 2 [Source:HGNC Symbol;Acc:HGNC:3030]	1587.58	1574.51	1610.44	1567.91	1533.11	1586.12	1314.37	1275.06	1246.19	1445.31	1595.38	1507.5	42.16	40.12	39.16	46.53	50.59	47.36	1397.28	0.244367	0.0794125	3.07719	0.00208965	0.0350517
ENSG00000188158.14	NHS	protein_coding	NHS actin remodeling regulator [Source:HGNC Symbol;Acc:HGNC:7820]	8222.71	6896.7	8183.1	8176.85	8211.54	8204.67	262.096	367.766	272.651	217.721	214.104	194.305	1.66	2.29	1.69	1.39	1.34	1.21	254.779	-0.522155	0.169677	-3.07735	0.00208851	0.0350517
ENSG00000156873.15	PHKG2	protein_coding	phosphorylase kinase catalytic subunit gamma 2 [Source:HGNC Symbol;Acc:HGNC:8931]	1368.66	1337.06	1324.61	1332.05	1314.89	1312.83	1403.95	1305.49	1193.38	1528.24	1689.75	1507.74	53.32	48.67	44.37	58.23	63.48	56.09	1438.1	0.274491	0.0893003	3.0738	0.00211353	0.035407
ENSG00000087299.11	L2HGDH	protein_coding	L-2-hydroxyglutarate dehydrogenase [Source:HGNC Symbol;Acc:HGNC:20499]	2713.5	3114.82	2873.8	3167.02	2654.02	2940.08	1671.46	1603.71	1748.35	1347.84	1469.65	1436.22	29.11	27.39	29.79	23.56	25.3	24.49	1546.19	-0.241444	0.078609	-3.07145	0.0021302	0.0355503
ENSG00000113048.16	MRPS27	protein_coding	mitochondrial ribosomal protein S27 [Source:HGNC Symbol;Acc:HGNC:14512]	2451.96	2472.1	2463.57	2501.83	2499.03	2506.86	2854.29	3028.72	3135.09	2635.26	2579.9	2598.78	58.13	60.57	62.52	53.89	51.96	51.86	2805.34	-0.20669	0.0672863	-3.0718	0.00212775	0.0355503
ENSG00000196155.12	PLEKHG4	protein_coding	pleckstrin homology and RhoGEF domain containing G4 [Source:HGNC Symbol;Acc:HGNC:24501]	2957.91	2371.12	3172.45	3498.09	4249.53	3780.62	135.537	119.199	86.3289	77.6222	63.4014	47.5111	2.09	1.8	1.3	1.2	0.96	0.72	88.2512	-0.857888	0.279269	-3.0719	0.00212702	0.0355503
ENSG00000163362.10	INAVA	protein_coding	innate immunity activator [Source:HGNC Symbol;Acc:HGNC:25599]	2768.73	3118.67	3037.33	3339.46	2929.26	3127.82	413.397	302.34	354.873	254.005	278.674	243.587	6.86	4.93	5.76	4.23	4.57	3.96	307.813	-0.470229	0.15317	-3.06998	0.00214071	0.0356803
ENSG00000166816.13	LDHD	protein_coding	lactate dehydrogenase D [Source:HGNC Symbol;Acc:HGNC:19708]	1708.16	1746.83	1641.04	1614.7	1790.64	1607.37	410.153	334.11	350.847	487.228	432.649	533.776	12.32	9.85	10.32	14.69	12.85	15.71	424.804	0.410836	0.133848	3.06943	0.00214466	0.0357008
ENSG00000166401.14	SERPINB8	protein_coding	serpin family B member 8 [Source:HGNC Symbol;Acc:HGNC:8952]	1602.47	2082.7	1797.86	1916.48	1315.53	1306.6	48.2759	48.3044	47.6017	65.4469	105.964	97.65	1.48	1.45	1.43	2.01	3.23	2.94	68.9214	0.891021	0.290329	3.069	0.00214778	0.0357076
ENSG00000134247.9	PTGFRN	protein_coding	prostaglandin F2 receptor inhibitor [Source:HGNC Symbol;Acc:HGNC:9601]	3887.78	3569.84	3586.06	3904.65	3538.9	3799.2	1830.98	1948.22	2045.95	1594	1748.45	1579.78	24.95	26.05	27.29	21.81	23.56	21.09	1791.21	-0.244825	0.0798099	-3.0676	0.00215784	0.0357451
ENSG00000142945.12	KIF2C	protein_coding	kinesin family member 2C [Source:HGNC Symbol;Acc:HGNC:6393]	2507.1	2409.1	2515.89	2607.62	2629.36	2528.94	1567.96	1564.71	1617.94	1442.73	1227.13	1301.87	31.32	30.67	31.64	28.92	24.24	25.48	1453.71	-0.257588	0.0839686	-3.06767	0.00215733	0.0357451
ENSG00000188322.4	SBK1	protein_coding	SH3 domain binding kinase 1 [Source:HGNC Symbol;Acc:HGNC:17699]	4813.54	4806.37	4809.72	4810.74	4810.2	4809.97	448.436	354.906	348.656	311.521	250.285	271.178	4.71	3.66	3.59	3.29	2.6	2.79	330.832	-0.46674	0.152154	-3.06755	0.0021582	0.0357451
ENSG00000227051.6	C14orf132	protein_coding	chromosome 14 open reading frame 132 [Source:HGNC Symbol;Acc:HGNC:20346]	5439.86	5451.14	5568.52	5137.08	5718.5	5459.48	763.659	1049.66	881.255	1092.71	1273.16	1089.61	7.07	9.54	7.99	10.16	11.65	9.89	1025.03	0.359564	0.117243	3.06681	0.00216354	0.0357884
ENSG00000219200.11	RNASEK	protein_coding	ribonuclease K [Source:HGNC Symbol;Acc:HGNC:33911]	407.863	395.282	406.726	408.958	408.849	401.622	1713.53	1666.39	1633.15	1971.86	1890.82	1966.16	213.99	204.24	199.71	247.3	233.59	240.55	1806.98	0.218151	0.0711581	3.06572	0.00217145	0.035874
ENSG00000101098.12	RIMS4	protein_coding	regulating synaptic membrane exocytosis 4 [Source:HGNC Symbol;Acc:HGNC:16183]	4179.16	4373.44	4461.57	4784.88	4091.51	3963.55	532.571	582.709	543.11	402.674	431.408	462.626	6.26	6.72	6.25	4.76	5.02	5.32	492.502	-0.352747	0.11509	-3.06497	0.00217694	0.0358744
ENSG00000105518.13	TMEM205	protein_coding	transmembrane protein 205 [Source:HGNC Symbol;Acc:HGNC:29631]	627.932	625.514	626.78	613.984	618.979	614.853	2699.08	2671.7	2401.93	3029.98	3099.92	2928.39	219.69	213.42	191.4	247.5	249.49	233.46	2805.17	0.220728	0.0720147	3.06503	0.00217645	0.0358744
ENSG00000160190.13	SLC37A1	protein_coding	solute carrier family 37 member 1 [Source:HGNC Symbol;Acc:HGNC:11024]	2392.48	2204.68	2278.07	2340.11	2359.82	2290.66	1167.15	1310.68	1280.11	1431.81	1475.4	1584.03	25.54	28.16	27.43	31.46	31.94	33.97	1374.87	0.25952	0.0847108	3.06359	0.00218695	0.0359942
ENSG00000065534.18	MYLK	protein_coding	myosin light chain kinase [Source:HGNC Symbol;Acc:HGNC:7590]	4385.4	3449.66	5246.23	6809.61	7677.73	6001.89	68.0085	108.268	62.9722	40.9242	42.6211	35.2997	0.63	1	0.57	0.38	0.4	0.33	59.6797	-0.978502	0.319696	-3.06073	0.002208	0.0362046
ENSG00000184916.8	JAG2	protein_coding	jagged 2 [Source:HGNC Symbol;Acc:HGNC:6189]	2987.38	2507.27	2888.23	3592.5	3511.5	2822.32	980.214	975.495	811.452	636.516	696.135	817.493	16.36	15.99	13.26	10.67	11.49	13.38	819.539	-0.361108	0.117967	-3.0611	0.00220527	0.0362046
ENSG00000275111.4	ZNF2	protein_coding	zinc finger protein 2 [Source:HGNC Symbol;Acc:HGNC:12991]	2713.42	2662.98	2737.7	2816.18	2878.81	3102.39	162.38	155.698	176.686	120.276	98.6855	105.979	2.92	2.74	3.11	2.17	1.75	1.87	136.618	-0.607068	0.198337	-3.06079	0.00220757	0.0362046
ENSG00000163840.9	DTX3L	protein_coding	deltex E3 ubiquitin ligase 3L [Source:HGNC Symbol;Acc:HGNC:30323]	5689.54	5682.37	5685.72	5686.74	5642.07	5657.15	4994.95	5329.65	5243.31	6255.79	6128.83	5559.09	44.52	46.62	45.76	55.97	54.01	48.54	5585.27	0.204381	0.0668131	3.05899	0.00222082	0.0363695
ENSG00000166803.11	PCLAF	protein_coding	PCNA clamp associated factor [Source:HGNC Symbol;Acc:HGNC:28961]	670.286	673.622	693.418	674.295	691.118	677.879	2521.54	2721.13	2650.18	2391.32	2246.98	2098.46	187.48	198.63	192.96	178.5	165.17	152.87	2438.28	-0.229237	0.0749499	-3.05853	0.00222422	0.0363797
ENSG00000136824.18	SMC2	protein_coding	structural maintenance of chromosomes 2 [Source:HGNC Symbol;Acc:HGNC:14011]	5193.27	5158.19	5088.85	5201.55	4992.69	5112.73	2236.2	2315.17	2582.06	2069.07	2072.96	1858.19	22.07	22.42	24.95	20.5	20.22	17.97	2188.93	-0.251387	0.0822225	-3.0574	0.00223268	0.0364727
ENSG00000104369.4	JPH1	protein_coding	junctophilin 1 [Source:HGNC Symbol;Acc:HGNC:14201]	3492.93	4132.89	4120.34	4196.74	3676.05	3711.17	555.6	465.747	482.178	333.635	418.861	387.567	7.24	5.96	6.16	4.37	5.4	4.95	440.592	-0.40218	0.131609	-3.05588	0.00224402	0.0366124
ENSG00000138326.18	RPS24	protein_coding	ribosomal protein S24 [Source:HGNC Symbol;Acc:HGNC:10411]	302.772	296.652	298.571	300.565	301.094	300.882	30200.5	33419.4	34130.2	27835.9	28371.7	29497.9	5089.2	5527.06	5631.57	4708.39	4727.3	4869.19	30575.8	-0.189744	0.0621216	-3.05439	0.00225518	0.0367489
ENSG00000241322.10	CDRT1	protein_coding	CMT1A duplicated region transcript 1 [Source:HGNC Symbol;Acc:HGNC:14379]	1367.52	981.671	1106.75	1149.86	1112.58	1166.57	24.9316	39.5393	25.5718	54.4143	63.5328	66.3607	1.09	1.74	1.12	2.41	2.78	2.87	45.7099	1.05964	0.347031	3.05343	0.00226239	0.0368206
ENSG00000068724.15	TTC7A	protein_coding	tetratricopeptide repeat domain 7A [Source:HGNC Symbol;Acc:HGNC:19750]	4438.79	4350.54	4548.09	4592.66	4507.73	4625.35	1600.29	1579.59	1485.09	1297.55	1356.96	1306.78	17.95	17.38	16.32	14.61	15.05	14.36	1437.72	-0.236472	0.0774857	-3.05181	0.00227466	0.0369744
ENSG00000156299.13	TIAM1	protein_coding	T-cell lymphoma invasion and metastasis 1 [Source:HGNC Symbol;Acc:HGNC:11805]	5151.82	5176.53	5095.8	4496.58	5145.35	5928.06	396.078	386.568	435.759	367.853	259.903	234.832	3.89	3.72	4.18	3.63	2.52	2.26	346.848	-0.505561	0.165792	-3.04937	0.00229321	0.0372299
ENSG00000198853.11	RUSC2	protein_coding	RUN and SH3 domain containing 2 [Source:HGNC Symbol;Acc:HGNC:23625]	5044.88	4816.48	5076.51	4242.84	5012.85	5046.28	379.442	384.431	394.969	580.081	442.612	497.539	3.95	3.92	4.02	6.06	4.55	5.07	446.531	0.391931	0.128582	3.04811	0.00230283	0.03734
ENSG00000100393.12	EP300	protein_coding	E1A binding protein p300 [Source:HGNC Symbol;Acc:HGNC:3373]	7947.67	7736.94	7672.54	7838.61	6895.99	7656.4	3111.94	3088.55	3205.05	2648.49	2867.06	2674.09	20.66	20.13	20.83	17.65	18.82	17.39	2932.53	-0.201451	0.0661499	-3.04537	0.00232397	0.0376363
ENSG00000008735.13	MAPK8IP2	protein_coding	mitogen-activated protein kinase 8 interacting protein 2 [Source:HGNC Symbol;Acc:HGNC:6883]	3549.99	3466.4	3564.98	3482.29	3517.38	3495.31	247.973	167.621	180.705	303.433	253.979	312.728	3.57	2.37	2.55	4.39	3.62	4.41	244.427	0.546866	0.179612	3.0447	0.00232912	0.0376732
ENSG00000076248.10	UNG	protein_coding	uracil DNA glycosylase [Source:HGNC Symbol;Acc:HGNC:12572]	1898.75	1891.38	1889.89	1905.78	1897.5	1900.84	3586.51	3735.95	3936.31	3184.21	3192.98	3392.38	95.59	97.72	102.72	85.19	84.15	88.56	3504.72	-0.20425	0.0671186	-3.04312	0.00234136	0.0377318
ENSG00000113621.14	TXNDC15	protein_coding	thioredoxin domain containing 15 [Source:HGNC Symbol;Acc:HGNC:20652]	1457.14	1316.86	1236.81	1228.52	1176.56	1099.81	598.076	679.524	820.077	837.985	909.008	957.187	24.24	27.03	32.55	34.07	36.44	38	800.307	0.366763	0.120513	3.04335	0.00233962	0.0377318
ENSG00000166508.17	MCM7	protein_coding	minichromosome maintenance complex component 7 [Source:HGNC Symbol;Acc:HGNC:6950]	2321.29	2304.69	2341.94	2314.2	2319.44	2315.13	11681.8	10928.2	10953.1	9854.69	9819.13	10133.8	254.67	233.83	233.82	215.66	211.68	216.42	10561.8	-0.17114	0.0562327	-3.04343	0.00233898	0.0377318
ENSG00000115457.9	IGFBP2	protein_coding	insulin like growth factor binding protein 2 [Source:HGNC Symbol;Acc:HGNC:5471]	931.732	882.234	918.77	935.861	938.189	931.411	1440.94	1397.28	1497.76	1572.14	1771	1831.34	78.96	75.14	80.34	86.48	95.94	98.29	1585.07	0.254721	0.0837593	3.0411	0.00235715	0.0379082
ENSG00000138439.11	FAM117B	protein_coding	family with sequence similarity 117 member B [Source:HGNC Symbol;Acc:HGNC:14440]	5413.14	5396.96	5580.72	5581.74	5099.23	5356.12	436.111	481.993	460.631	360.809	369.23	339.407	4.08	4.43	4.22	3.39	3.42	3.11	408.037	-0.368405	0.121172	-3.04035	0.00236306	0.0379082
ENSG00000156017.12	CARNMT1	protein_coding	carnosine N-methyltransferase 1 [Source:HGNC Symbol;Acc:HGNC:23435]	3173.94	3524.68	3290.74	3891.87	3425.95	3169.3	825.746	839.256	932.327	624.882	685.89	762.337	12.27	12.24	13.56	9.32	10.08	11.09	778.395	-0.325169	0.106945	-3.04051	0.00236177	0.0379082
ENSG00000213995.11	NAXD	protein_coding	NAD(P)HX dehydratase [Source:HGNC Symbol;Acc:HGNC:25576]	2255.92	2254.51	2261.01	2257.45	2254	2271.8	884.287	908.253	851.855	1028.91	1084.35	1056.69	19.79	19.95	18.67	23.12	24	23.17	969.057	0.261826	0.08612	3.04025	0.00236385	0.0379082
ENSG00000100129.17	EIF3L	protein_coding	eukaryotic translation initiation factor 3 subunit L [Source:HGNC Symbol;Acc:HGNC:18138]	1233.24	1303.81	1417.65	1371.85	1393.4	1265.54	4626.03	4399.57	4257.08	3537.09	3649.36	4144.26	175.99	164.26	158.6	135.05	137.28	154.46	4102.24	-0.228451	0.0752511	-3.03585	0.00239862	0.038372
ENSG00000124098.9	FAM210B	protein_coding	family with sequence similarity 210 member B [Source:HGNC Symbol;Acc:HGNC:16102]	2741.81	2801.61	2778.27	2829.37	2759.22	2774.35	1116.67	1205.49	1214.62	941.816	1004.86	1005.27	20.31	21.52	21.63	17.19	18.07	17.9	1081.46	-0.260947	0.0859474	-3.03612	0.00239644	0.038372
ENSG00000143365.17	RORC	protein_coding	RAR related orphan receptor C [Source:HGNC Symbol;Acc:HGNC:10260]	2542.97	2566.82	2625.95	2638.77	2710.06	2629.96	265.517	255.44	254.555	334.761	336.754	357.009	5.12	4.84	4.81	6.49	6.43	6.75	300.675	0.409059	0.134813	3.03428	0.00241114	0.0385203
ENSG00000160408.14	ST6GALNAC6	protein_coding	ST6 N-acetylgalactosaminide alpha-2,6-sialyltransferase 6 [Source:HGNC Symbol;Acc:HGNC:23364]	2123.5	2005.48	1999.26	2183.17	2019.08	1943.15	543.43	582.005	469.612	411.401	404.591	414.979	13.45	14.13	11.37	10.22	9.9	10.05	471.005	-0.370459	0.122105	-3.03395	0.00241375	0.0385203
ENSG00000170540.14	ARL6IP1	protein_coding	ADP ribosylation factor like GTPase 6 interacting protein 1 [Source:HGNC Symbol;Acc:HGNC:697]	2171.83	2195.08	2182.25	2183.7	2185.3	2170.39	8695.77	9215.9	9847.87	8246.7	7981.62	8096.79	201.57	209.66	223.54	191.88	182.95	183.85	8680.8	-0.190715	0.0628814	-3.03294	0.00242185	0.0386026
ENSG00000130770.17	ATPIF1	protein_coding	ATPase inhibitory factor 1 [Source:HGNC Symbol;Acc:HGNC:871]	406.398	415.742	409.771	386.456	396.381	392.506	2422.47	2508.54	2380.55	2774.14	2844.37	2763.42	305.43	310.41	293.88	351.07	354.6	341.28	2615.58	0.197058	0.0649982	3.03174	0.00243148	0.0386623
ENSG00000279809.1	AC005538.2	TEC		1685.54	1678.37	1681.72	1682.74	1682.2	1681.97	38.8247	42.0142	72.7159	67.6582	92.8437	160.1	1.17	1.25	2.14	2.03	2.76	4.71	79.024	1.06331	0.350686	3.03209	0.00242869	0.0386623
ENSG00000117650.12	NEK2	protein_coding	NIMA related kinase 2 [Source:HGNC Symbol;Acc:HGNC:7745]	1703.37	1702.75	1701.63	1732.62	1845.12	1725.39	1055.75	1088.3	1096.36	989.439	838.647	809.566	30.78	31.14	31.3	28.95	24.18	23.13	979.674	-0.297841	0.0982904	-3.03021	0.00244382	0.0388115
ENSG00000016391.10	CHDH	protein_coding	choline dehydrogenase [Source:HGNC Symbol;Acc:HGNC:24288]	7486.54	7479.37	7482.72	7483.74	7483.2	7482.97	605.001	590.59	584.933	474.824	461.551	487.625	4.09	3.92	3.87	3.22	3.09	3.23	534.089	-0.320696	0.105908	-3.02807	0.00246117	0.0390399
ENSG00000186868.15	MAPT	protein_coding	microtubule associated protein tau [Source:HGNC Symbol;Acc:HGNC:6893]	4278.26	4086.82	4410.41	4157.45	4216.51	4073.71	1700.05	1751.01	1502.66	1346.56	1451.08	1338.82	20.46	20.68	17.7	16.26	17.26	15.78	1515.05	-0.260341	0.0860358	-3.02596	0.00247843	0.0392188
ENSG00000240087.3	RPSAP12	processed_pseudogene	ribosomal protein SA pseudogene 12 [Source:HGNC Symbol;Acc:HGNC:6504]	709.55	702.37	705.73	706.74	706.2	705.97	234.989	261.972	266.152	166.372	203.162	174.004	16.82	18.44	18.67	11.94	14.36	12.19	217.776	-0.494702	0.163484	-3.02598	0.00247825	0.0392188
ENSG00000072682.18	P4HA2	protein_coding	prolyl 4-hydroxylase subunit alpha 2 [Source:HGNC Symbol;Acc:HGNC:8547]	2097.63	2090.03	1992.3	1943.25	1835.39	2046.99	873.33	939.438	973.872	1084.07	1216.33	1085.47	22.09	23.33	24.12	27.53	30.43	26.9	1028.75	0.27834	0.0919951	3.02559	0.00248148	0.0392199
ENSG00000066248.14	NGEF	protein_coding	neuronal guanine nucleotide exchange factor [Source:HGNC Symbol;Acc:HGNC:7807]	1427.48	1310.25	1260.16	1310.63	1060.91	977.315	60.7916	62.9924	62.0836	77.6282	117.038	133.937	2.52	2.57	2.54	3.25	4.82	5.46	85.7331	0.818219	0.270592	3.02381	0.00249614	0.0393569
ENSG00000196074.12	SYCP2	protein_coding	synaptonemal complex protein 2 [Source:HGNC Symbol;Acc:HGNC:11490]	2849.84	2930.85	2518.15	3036.68	2462.85	2753.76	372.017	428.536	391.655	322.122	314.111	215.39	6.85	7.73	7.04	5.96	5.7	3.88	340.641	-0.492264	0.16278	-3.0241	0.00249375	0.0393569
ENSG00000144724.19	PTPRG	protein_coding	protein tyrosine phosphatase, receptor type G [Source:HGNC Symbol;Acc:HGNC:9671]	6027.49	6928.16	6587.94	6077.26	6407.85	6260.67	1700.22	1539.64	1710.57	1436.73	1351.96	1402.06	13.49	11.99	13.29	11.44	10.6	10.9	1523.55	-0.240992	0.0798147	-3.0194	0.00253278	0.0398867
ENSG00000116128.10	BCL9	protein_coding	B-cell CLL/lymphoma 9 [Source:HGNC Symbol;Acc:HGNC:1008]	3336.31	3442.96	3548.05	3276.76	4016.36	3660.47	1203.36	1062.01	1007.68	997.784	777.744	812.488	17.19	14.89	14.1	14.32	10.99	11.37	976.833	-0.339227	0.112384	-3.01847	0.00254051	0.0399606
ENSG00000105976.14	MET	protein_coding	MET proto-oncogene, receptor tyrosine kinase [Source:HGNC Symbol;Acc:HGNC:7029]	3792.22	3747.91	3819.25	4378.64	3197.32	4232.16	948.713	876.896	935.772	754.149	797.17	731.102	12.48	11.34	12.06	9.97	10.38	9.43	840.632	-0.279855	0.0927262	-3.01808	0.00254383	0.039965
ENSG00000075407.18	ZNF37A	protein_coding	zinc finger protein 37A [Source:HGNC Symbol;Acc:HGNC:13102]	5826.17	6423.14	6421.26	6889.06	6645.05	6803.2	922.406	875.992	783.408	716.762	712.504	654.673	7.19	6.7	5.97	5.6	5.49	5	777.628	-0.308991	0.102407	-3.0173	0.00255035	0.0400195
ENSG00000163682.15	RPL9	protein_coding	ribosomal protein L9 [Source:HGNC Symbol;Acc:HGNC:10369]	580.491	570.867	576.414	576.299	575.89	578.475	10166	11696.1	12067.9	9484.98	10012.4	9747.45	891.87	1007.06	1036.64	835.22	868.57	837.67	10529.2	-0.214512	0.0711636	-3.01435	0.00257532	0.040363
ENSG00000110375.2	UPK2	protein_coding	uroplakin 2 [Source:HGNC Symbol;Acc:HGNC:12579]	742.504	733.475	741.198	740.96	741.435	733.97	85.5361	76.4744	88.9478	118.924	140.813	138.966	5.85	5.14	5.96	8.17	9.53	9.32	108.275	0.663522	0.220263	3.01241	0.00259185	0.0405738
ENSG00000273445.1	AC133644.2	antisense_RNA		361.66	354.5	357.84	358.85	358.31	358.09	250.909	293.079	236.514	195.18	196.406	155.237	35.42	40.61	32.69	27.66	27.42	21.47	221.223	-0.517143	0.171781	-3.01047	0.00260846	0.0407851
ENSG00000174437.16	ATP2A2	protein_coding	ATPase sarcoplasmic/endoplasmic reticulum Ca2+ transporting 2 [Source:HGNC Symbol;Acc:HGNC:812]	3907.33	3926.7	3924.08	3942.8	3929.46	3941.69	8891.34	8937.08	9175.84	7944.2	7824.71	8284.08	114.44	112.9	115.64	102.64	99.58	104.45	8509.56	-0.166779	0.0554716	-3.00656	0.00264222	0.0411654
ENSG00000176945.16	MUC20	protein_coding	mucin 20, cell surface associated [Source:HGNC Symbol;Acc:HGNC:23282]	1855.36	1587.51	1798.5	1918.71	1873.4	1636.93	162.635	197.513	160.532	203.633	259.948	300.959	4.65	5.54	4.47	5.84	7.31	8.4	214.192	0.560221	0.186355	3.0062	0.00264532	0.0411654
ENSG00000180573.9	HIST1H2AC	protein_coding	histone cluster 1 H2A family member c [Source:HGNC Symbol;Acc:HGNC:4733]	1463.52	1450.9	1459.54	1471.83	1467.12	1465.05	2326.17	2680.16	2679.67	2813.9	3280.84	3047.99	80.4	90.92	90.69	97.63	112.13	103.2	2804.78	0.24992	0.0831089	3.00714	0.0026372	0.0411654
ENSG00000205208.4	C4orf46	protein_coding	chromosome 4 open reading frame 46 [Source:HGNC Symbol;Acc:HGNC:27320]	2552.36	2531.06	2634.97	2690.63	2825.55	2713.13	454.754	499.369	502.984	411.497	350.389	364.62	8.66	9.33	9.37	7.86	6.6	6.8	430.594	-0.370081	0.123101	-3.00631	0.00264439	0.0411654
ENSG00000014216.15	CAPN1	protein_coding	calpain 1 [Source:HGNC Symbol;Acc:HGNC:1476]	2504.51	2523.24	2512.78	2456.87	2437.68	2482.62	7582.67	6941.31	7106.15	7762.14	8414.04	8580.01	154.24	138.56	141.53	158.48	169.22	170.96	7731.03	0.194602	0.0648005	3.00309	0.00267253	0.0414906
ENSG00000169255.13	B3GALNT1	protein_coding	beta-1,3-N-acetylgalactosaminyltransferase 1 (globoside blood group) [Source:HGNC Symbol;Acc:HGNC:918]	2154.57	2297.18	2316.04	2238.87	2187.87	2214.5	1202.71	1224.21	1177.83	1488.04	1455.16	1334.08	27.22	27.19	26.1	33.8	32.57	29.58	1313.67	0.24564	0.0817902	3.00329	0.00267079	0.0414906
ENSG00000171262.11	FAM98B	protein_coding	family with sequence similarity 98 member B [Source:HGNC Symbol;Acc:HGNC:26773]	3107.65	3021.95	2940.65	3740.69	3024.49	3490.32	1111.52	1344.8	1449.33	981.338	1146.22	990.277	17.52	20.8	22.36	15.52	17.87	15.29	1170.58	-0.327841	0.10921	-3.00193	0.00268278	0.0416005
ENSG00000196950.13	SLC39A10	protein_coding	solute carrier family 39 member 10 [Source:HGNC Symbol;Acc:HGNC:20861]	4724.23	4741.31	4788.27	4902.13	4818.74	4955.06	1262.11	1440.04	1333.32	1058.67	1225.09	1037.04	13.24	14.83	13.69	11.15	12.71	10.65	1226.06	-0.283376	0.0944194	-3.00125	0.00268876	0.0416441
ENSG00000263528.7	IKBKE	protein_coding	inhibitor of nuclear factor kappa B kinase subunit epsilon [Source:HGNC Symbol;Acc:HGNC:14552]	2412.34	2334.58	2425.6	2274.72	2568.93	2518.42	958.595	977.296	854.027	1187.72	1077.65	1112.31	20.03	20.04	17.47	24.91	22.26	22.76	1027.94	0.277402	0.0924474	3.00064	0.0026941	0.0416777
ENSG00000104738.16	MCM4	protein_coding	minichromosome maintenance complex component 4 [Source:HGNC Symbol;Acc:HGNC:6947]	2461.12	2426.91	2476.68	2579.71	2624.82	2411.96	8259.77	8204.62	8530.24	7442.75	7149.44	7621.27	167.35	163.16	169.25	151.39	143.24	151.25	7868.03	-0.170057	0.0566909	-2.99972	0.00270227	0.0417548
ENSG00000108352.11	RAPGEFL1	protein_coding	Rap guanine nucleotide exchange factor like 1 [Source:HGNC Symbol;Acc:HGNC:17428]	2524.88	2432.74	2616.37	2533.45	2520.82	2516.9	1580.73	1714.82	1353.06	1257.47	1353.89	1154.74	31.67	33.72	26.54	25.29	26.83	22.68	1402.43	-0.303534	0.101229	-2.99847	0.00271336	0.041877
ENSG00000012660.13	ELOVL5	protein_coding	ELOVL fatty acid elongase 5 [Source:HGNC Symbol;Acc:HGNC:21308]	2567.03	2579.07	2577.5	2544.57	2576.58	2552.1	8694.27	8681.43	8937.95	10382.7	9855.67	9476.55	171.32	167.9	172.46	205.37	192.04	182.93	9338.08	0.174995	0.0583785	2.99759	0.00272122	0.0419241
ENSG00000160049.11	DFFA	protein_coding	DNA fragmentation factor subunit alpha [Source:HGNC Symbol;Acc:HGNC:2772]	3017.47	3017.84	2911.44	3014.59	3113.53	3225.86	2105.12	2136.86	2104.66	1868.72	1832.74	1808.54	34.93	34.79	34.18	31.11	30.06	29.39	1976.11	-0.20419	0.0681219	-2.99742	0.0027228	0.0419241
ENSG00000213190.3	MLLT11	protein_coding	MLLT11, transcription factor 7 cofactor [Source:HGNC Symbol;Acc:HGNC:16997]	3896.54	3889.37	3892.72	3893.74	3893.2	3892.97	236.835	231.355	190.856	296.473	316.219	291.599	3.07	2.96	2.42	3.87	4.07	3.71	260.555	0.457095	0.152554	2.99627	0.002733	0.0420319
ENSG00000187514.16	PTMA	protein_coding	prothymosin, alpha [Source:HGNC Symbol;Acc:HGNC:9623]	954.373	953.874	976.118	974.201	962.007	971.174	44788.7	42772	42828.7	40570.7	38090.1	37657.6	2346.36	2199.15	2196.98	2133.45	1973.12	1932.5	41118.1	-0.164862	0.0550536	-2.99458	0.00274827	0.0422173
ENSG00000070190.12	DAPP1	protein_coding	dual adaptor of phosphotyrosine and 3-phosphoinositides 1 [Source:HGNC Symbol;Acc:HGNC:16500]	2225.63	2585.7	2455.06	1968.14	2067.82	2038.24	24.2806	24.2333	27.543	50.7179	59.0233	50.5295	0.55	0.54	0.62	1.16	1.33	1.13	39.3731	1.06417	0.355593	2.99267	0.00276545	0.0423406
ENSG00000085982.13	USP40	protein_coding	ubiquitin specific peptidase 40 [Source:HGNC Symbol;Acc:HGNC:20069]	3544.1	3525.65	3451.86	2897.14	3208.96	3551.84	1106.33	1194.35	1231.46	1587.18	1520.52	1252.67	16.68	17.67	18.19	24.02	22.67	18.5	1315.41	0.300442	0.100394	2.99262	0.00276597	0.0423406
ENSG00000124664.10	SPDEF	protein_coding	SAM pointed domain containing ETS transcription factor [Source:HGNC Symbol;Acc:HGNC:17257]	1710.27	1703.56	1707.32	1708.18	1707.07	1707.3	1766.61	1428.44	1790.2	1796.45	2129.08	2301.66	52.32	41.52	51.92	53.41	62.35	66.78	1868.72	0.320101	0.106962	2.99267	0.00276546	0.0423406
ENSG00000196126.11	HLA-DRB1	protein_coding	major histocompatibility complex, class II, DR beta 1 [Source:HGNC Symbol;Acc:HGNC:4948]	1050.54	1043.37	1046.72	1047.74	1047.2	1046.97	643.871	599.223	555.359	798.823	729.264	712.312	31.11	28.4	26.25	38.7	34.84	33.69	673.141	0.316957	0.105959	2.99131	0.00277784	0.0424729
ENSG00000104549.11	SQLE	protein_coding	squalene epoxidase [Source:HGNC Symbol;Acc:HGNC:11279]	2259.66	2240.63	2215.94	2301.99	2214.78	2316.4	3834.05	4071.43	4439.53	4882.15	4653.29	4738.68	85.87	89.49	97.36	109.76	103.04	103.97	4436.5	0.209304	0.06999	2.99048	0.00278538	0.0425385
ENSG00000084733.10	RAB10	protein_coding	RAB10, member RAS oncogene family [Source:HGNC Symbol;Acc:HGNC:9759]	1765.72	1942.43	1972.8	1869.94	1827.43	1715.32	5230.83	5140.21	5012.7	5610.55	5820.09	5924.97	143.24	138.14	134.4	154.21	157.59	158.93	5456.55	0.17414	0.0583003	2.98695	0.0028178	0.0429371
ENSG00000136982.5	DSCC1	protein_coding	DNA replication and sister chromatid cohesion 1 [Source:HGNC Symbol;Acc:HGNC:24453]	2048.91	2061.06	2073.4	2022.48	2066.7	2085.53	901.28	913.68	976.55	806.328	749.629	750.153	22.13	22.01	23.47	19.87	18.2	18.04	849.602	-0.27647	0.0925602	-2.98692	0.00281801	0.0429371
ENSG00000131669.9	NINJ1	protein_coding	ninjurin 1 [Source:HGNC Symbol;Acc:HGNC:7824]	1097.29	1094.9	1083.82	1082.99	1086.21	1090.4	2369.26	2104.41	2096.45	2378.33	2766.33	2655.84	109.99	95.89	95.29	110.83	126.98	120.78	2395.1	0.246876	0.0827051	2.98502	0.00283563	0.0431299
ENSG00000184557.4	SOCS3	protein_coding	suppressor of cytokine signaling 3 [Source:HGNC Symbol;Acc:HGNC:19391]	2555.54	2548.37	2551.72	2552.74	2552.2	2551.97	196.97	152.045	175.166	288.928	203.184	272.817	3.9	2.96	3.4	5.75	3.98	5.3	214.85	0.547617	0.183466	2.98484	0.00283724	0.0431299
ENSG00000070540.12	WIPI1	protein_coding	WD repeat domain, phosphoinositide interacting 1 [Source:HGNC Symbol;Acc:HGNC:25471]	1362.37	1323.27	1283.67	1345.02	1352.19	1336.1	524.274	556.05	574.147	660.407	675.482	708.412	19.87	20.7	21.31	25.15	25.3	26.32	616.46	0.306492	0.102752	2.98282	0.00285609	0.0433663
ENSG00000189403.14	HMGB1	protein_coding	high mobility group box 1 [Source:HGNC Symbol;Acc:HGNC:4983]	1134.03	1123.58	1164.98	1129.84	1124.2	1101.03	21266.9	22073.5	22737.2	20253.3	19267.9	19518.9	952.12	969.89	996.78	910.21	852.99	856.02	20852.9	-0.162529	0.0544967	-2.98237	0.00286023	0.043379
ENSG00000137767.13	SQOR	protein_coding	sulfide quinone oxidoreductase [Source:HGNC Symbol;Acc:HGNC:20390]	1682.99	1552.35	1613.79	1630.1	1685.8	1584.91	377.215	420.852	409.929	497.788	538.06	499.726	11.74	12.87	12.5	15.55	16.57	15.24	457.26	0.345956	0.116186	2.97761	0.00290509	0.0440085
ENSG00000171130.17	ATP6V0E2	protein_coding	ATPase H+ transporting V0 subunit e2 [Source:HGNC Symbol;Acc:HGNC:21723]	1376.93	1346.53	1420.12	1396.98	1381.41	1397.87	769.805	785.122	755.74	866.871	1012.92	936.486	28.07	28.13	26.99	31.74	36.51	33.47	854.484	0.284104	0.0954279	2.97716	0.00290931	0.0440218
ENSG00000126461.14	SCAF1	protein_coding	SR-related CTD associated factor 1 [Source:HGNC Symbol;Acc:HGNC:30403]	3336.49	3551.45	3113.48	3122.71	3184.18	3144.97	2145.42	1589.03	1966.98	2235.09	2300.65	2487.07	33.5	24.35	30.08	35.03	35.52	38.04	2120.68	0.300232	0.10097	2.97347	0.00294449	0.044452
ENSG00000151151.5	IPMK	protein_coding	inositol polyphosphate multikinase [Source:HGNC Symbol;Acc:HGNC:20739]	5954.54	5947.37	5950.72	5951.74	5951.2	5950.97	600.408	679.096	698.955	529.6	524.794	529.284	5.1	5.66	5.82	4.52	4.41	4.41	593.691	-0.320793	0.107885	-2.97347	0.00294452	0.044452
ENSG00000113569.15	NUP155	protein_coding	nucleoporin 155 [Source:HGNC Symbol;Acc:HGNC:8063]	4981.52	4539.61	4660.06	4954.03	5012.52	4707.03	2609.73	2926.58	2976.73	2439.76	2362.22	2496.69	27.46	30.22	30.67	25.77	24.57	25.74	2635.28	-0.220991	0.0743757	-2.97128	0.00296565	0.0447197
ENSG00000100526.19	CDKN3	protein_coding	cyclin dependent kinase inhibitor 3 [Source:HGNC Symbol;Acc:HGNC:1791]	572.171	566.098	592.573	576.146	569.207	576.276	1058.07	1029.46	1053.99	931.253	832.425	852.163	92.99	88.8	90.71	82.15	72.34	73.36	959.566	-0.264137	0.0889133	-2.97072	0.00297103	0.0447495
ENSG00000151117.8	TMEM86A	protein_coding	transmembrane protein 86A [Source:HGNC Symbol;Acc:HGNC:26890]	2753.37	2081.66	3412.72	3096.67	3413.2	2883.63	62.9175	66.3184	47.7553	82.5333	96.0752	133.941	1.1	1.13	0.82	1.44	1.66	2.29	81.6037	0.841947	0.283492	2.96992	0.00297879	0.0448149
ENSG00000135245.9	HILPDA	protein_coding	hypoxia inducible lipid droplet associated [Source:HGNC Symbol;Acc:HGNC:28859]	1059.91	1072.99	1094.66	1053.23	1065.78	1042.33	626.189	683.541	674.957	789.554	783.712	849.315	29.74	31.84	31.38	37.63	36.78	39.51	734.54	0.289824	0.0975997	2.96952	0.00298267	0.0448219
ENSG00000223802.7	CERS1	protein_coding	ceramide synthase 1 [Source:HGNC Symbol;Acc:HGNC:14253]	1466.54	1301.64	1623.46	1601.97	1582.22	1508	229.138	220.788	193.613	147.833	148.953	152.922	7.68	7.24	6.35	4.96	4.92	5.01	182.21	-0.513326	0.17301	-2.96704	0.00300684	0.0451335
ENSG00000147642.16	SYBU	protein_coding	syntabulin [Source:HGNC Symbol;Acc:HGNC:26011]	2020.37	1976.11	2332.88	1851.19	2222.06	2289.6	497.463	598.242	539.694	445.295	422.527	413.579	11.95	14.08	12.67	10.72	10.02	9.71	486.134	-0.35143	0.11847	-2.96641	0.003013	0.0451743
ENSG00000180370.10	PAK2	protein_coding	p21 (RAC1) activated kinase 2 [Source:HGNC Symbol;Acc:HGNC:8591]	4378.98	4752.37	4853.12	4649.07	4434.19	4337.58	7100.66	7637.45	7908.01	8011.49	8997.45	9203.12	78.69	83.05	85.8	89.11	98.58	99.9	8142.98	0.210734	0.0710945	2.96415	0.00303523	0.0454558
ENSG00000120694.19	HSPH1	protein_coding	heat shock protein family H (Hsp110) member 1 [Source:HGNC Symbol;Acc:HGNC:16969]	2650.45	2699.48	2690.18	2568.97	2602.9	2669.23	7464.69	8101.82	8225.42	8988.01	9332.24	8720.03	142.64	151.93	153.89	172.39	176.31	163.21	8472.01	0.184198	0.0622269	2.9601	0.00307541	0.0460051
ENSG00000088876.11	ZNF343	protein_coding	zinc finger protein 343 [Source:HGNC Symbol;Acc:HGNC:16017]	2348.97	2405.88	2843.36	2868.23	2818.61	3145.69	206.701	230.917	181.251	146.934	144.359	134.39	3.84	4.21	3.29	2.74	2.65	2.45	174.09	-0.536192	0.18133	-2.95699	0.00310658	0.0464185
ENSG00000049283.17	EPN3	protein_coding	epsin 3 [Source:HGNC Symbol;Acc:HGNC:18235]	1819.96	2079.11	1874.55	1802.1	1724.02	1843.23	1725.43	1239.72	1586.81	1766.32	1968.12	1955.35	47.07	33.19	42.38	48.37	53.07	52.25	1706.94	0.320849	0.108568	2.95527	0.00312397	0.0466252
ENSG00000073350.13	LLGL2	protein_coding	LLGL2, scribble cell polarity complex component [Source:HGNC Symbol;Acc:HGNC:6629]	1731.21	1709.5	1671.48	1696.75	1705.43	1700.14	12853.8	10634.9	10715	13071.5	13320.5	13526.9	381.81	310.04	311.66	389.77	391.24	393.6	12353.7	0.222735	0.0754136	2.95352	0.00314176	0.0468376
ENSG00000150347.14	ARID5B	protein_coding	AT-rich interaction domain 5B [Source:HGNC Symbol;Acc:HGNC:17362]	7712.54	7705.37	7664.98	7709.74	7709.2	7708.97	794.169	946.753	845.044	1050.71	1068.76	1019.21	5.21	6.1	5.43	6.92	6.94	6.56	954.102	0.280355	0.0949346	2.95314	0.00314559	0.0468415
ENSG00000082701.14	GSK3B	protein_coding	glycogen synthase kinase 3 beta [Source:HGNC Symbol;Acc:HGNC:4617]	3778.82	4249.6	4220.23	3716.29	3861.93	3559.51	3750.13	3448	3510	4161.49	3874.65	4261.66	48.74	43.99	44.68	54.31	49.8	54.27	3834.32	0.200433	0.0678953	2.9521	0.00315625	0.0468974
ENSG00000122218.14	COPA	protein_coding	coatomer protein complex subunit alpha [Source:HGNC Symbol;Acc:HGNC:2230]	4353.22	4340.07	4119.08	4101.25	4166.67	4135.93	3930.31	3888.21	4059.9	4571.9	4354.22	4502.87	47.3	45.92	47.84	55.23	51.82	53.09	4217.9	0.177182	0.0600223	2.95193	0.0031579	0.0468974
ENSG00000123983.13	ACSL3	protein_coding	acyl-CoA synthetase long chain family member 3 [Source:HGNC Symbol;Acc:HGNC:3570]	2609.79	2594.31	2621.99	2627.22	2683.13	2579.97	3626.62	4090.5	4127.11	4513.52	4463.57	4678.34	70.02	77.51	78.02	87.47	85.22	88.48	4249.94	0.205746	0.0697118	2.95137	0.00316363	0.0468974
ENSG00000159720.11	ATP6V0D1	protein_coding	ATPase H+ transporting V0 subunit d1 [Source:HGNC Symbol;Acc:HGNC:13724]	1485.71	1485.1	1510	1512.62	1499.47	1504.63	3891.06	3690.65	3791.16	4168.69	4248.43	4565.85	131.23	122.14	125.18	141.11	141.66	150.83	4059.29	0.191354	0.0648346	2.95141	0.00316324	0.0468974
ENSG00000061936.9	SFSWAP	protein_coding	splicing factor SWAP homolog [Source:HGNC Symbol;Acc:HGNC:10790]	2834.15	2635.8	2684.97	2753.18	2344.83	2467.45	1466.53	1375.67	1378.1	1547.78	1827.59	1653.98	28.35	26.11	26.09	30.05	34.96	31.33	1541.63	0.250528	0.0849239	2.95003	0.00317745	0.046916
ENSG00000082438.15	COBLL1	protein_coding	cordon-bleu WH2 repeat protein like 1 [Source:HGNC Symbol;Acc:HGNC:23571]	3756.78	3391.94	3574.22	3393.1	3771.23	3982.34	851.774	1022.17	1067.27	835.284	798.488	720.174	11.84	13.95	14.52	11.65	10.99	9.8	882.528	-0.323476	0.109634	-2.95049	0.00317269	0.046916
ENSG00000134575.9	ACP2	protein_coding	acid phosphatase 2, lysosomal [Source:HGNC Symbol;Acc:HGNC:123]	1813.93	1791.3	1748.56	1758.42	1805.98	1833.66	1057.22	1044.88	1086.1	1285.18	1193.52	1290.53	29.83	28.94	30.01	36.41	33.31	35.68	1159.57	0.242638	0.0822541	2.94986	0.00317917	0.046916
ENSG00000152217.16	SETBP1	protein_coding	SET binding protein 1 [Source:HGNC Symbol;Acc:HGNC:15573]	8778.47	7836.01	7939.34	7710.28	7957.02	8497.52	428.006	417.5	416.086	366.178	307.255	283.001	2.67	2.55	2.53	2.3	1.89	1.72	369.69	-0.402352	0.136367	-2.9505	0.00317264	0.046916
ENSG00000121957.12	GPSM2	protein_coding	G protein signaling modulator 2 [Source:HGNC Symbol;Acc:HGNC:29501]	3084.94	2690.57	2837.14	2870.07	3079.26	3007.15	1344.1	1604.76	1602.76	1382.73	1169.46	1143.11	23.23	27.24	27.14	24.01	19.99	19.36	1374.51	-0.300614	0.101956	-2.94848	0.00319345	0.0470738
ENSG00000171401.14	KRT13	protein_coding	keratin 13 [Source:HGNC Symbol;Acc:HGNC:6415]	1291.24	1268.64	1449.22	1204.51	1449.41	1293.11	219.68	213.843	150.068	126.253	121.59	134.529	8.39	8.03	5.62	4.84	4.6	5.04	160.999	-0.602272	0.204297	-2.94802	0.00319815	0.0470902
ENSG00000204054.13	LINC00963	processed_transcript	long intergenic non-protein coding RNA 963 [Source:HGNC Symbol;Acc:HGNC:48716]	2355.36	2429.05	2482.17	2348.18	2402.21	2523.87	1664.84	1637.4	1532.02	1906.49	1899.93	1822.85	34.74	33.54	31.32	39.94	39.21	37.27	1743.9	0.219273	0.0744256	2.94621	0.00321697	0.0473143
ENSG00000121211.7	MND1	protein_coding	meiotic nuclear divisions 1 [Source:HGNC Symbol;Acc:HGNC:24839]	752.679	780.635	759.684	766.547	775.815	784.107	246.148	271.509	293.846	202.844	192.278	195.665	16.17	17.5	18.9	13.37	12.49	12.59	233.717	-0.458451	0.155744	-2.94361	0.00324408	0.0476596
ENSG00000109572.13	CLCN3	protein_coding	chloride voltage-gated channel 3 [Source:HGNC Symbol;Acc:HGNC:2021]	4733.09	5210.42	5276.46	4620.48	4980.94	5098.63	1615.73	1645.2	1650.16	1949.16	1901.36	1835.99	16.41	16.4	16.4	19.86	19.09	18.25	1766.25	0.210167	0.0714769	2.94035	0.00327844	0.0481106
ENSG00000182185.18	RAD51B	protein_coding	RAD51 paralog B [Source:HGNC Symbol;Acc:HGNC:9822]	703.205	975.263	949.638	713.149	868.425	886.687	262.324	227.077	193.496	175.155	146.215	147.456	15.73	13.38	11.36	10.56	8.68	8.66	191.952	-0.540527	0.183965	-2.9382	0.0033012	0.0483906
ENSG00000241878.11	PISD	protein_coding	phosphatidylserine decarboxylase [Source:HGNC Symbol;Acc:HGNC:8999]	1968.45	1945.74	2047.23	2032.66	2037.22	1963.42	948.975	884.523	854.142	1039.51	1064.09	1118.31	24.02	21.96	21.15	26.4	26.62	27.71	984.926	0.262608	0.0893885	2.93782	0.00330527	0.0483962
ENSG00000107862.4	GBF1	protein_coding	golgi brefeldin A resistant guanine nucleotide exchange factor 1 [Source:HGNC Symbol;Acc:HGNC:4181]	6157	6169.18	6130.42	6184.35	6142.51	6130.84	3613.57	3490.31	3652.98	4016.54	3966.59	4227.73	29.7	28.15	29.4	33.14	32.24	34.04	3827.94	0.183164	0.0623829	2.93613	0.00332331	0.0486062
ENSG00000182827.8	ACBD3	protein_coding	acyl-CoA binding domain containing 3 [Source:HGNC Symbol;Acc:HGNC:15453]	3215.87	3387.37	3390.72	3266.1	3059.99	3327.65	2136.96	2204.55	2144.88	1781.59	1974.5	1845.89	33.02	33.43	32.45	27.64	30.17	27.95	2014.73	-0.212754	0.0724716	-2.93569	0.00332807	0.0486217
ENSG00000170382.11	LRRN2	protein_coding	leucine rich repeat neuronal 2 [Source:HGNC Symbol;Acc:HGNC:16914]	2571.19	2577.62	2847.66	3146.51	3072.31	3157.34	123.832	105.237	107.115	58.1096	73.2776	73.8745	2.17	1.82	1.84	1.02	1.27	1.27	90.2456	-0.714247	0.243405	-2.9344	0.00334193	0.0487699
ENSG00000005100.12	DHX33	protein_coding	DEAH-box helicase 33 [Source:HGNC Symbol;Acc:HGNC:16718]	4845.33	5093.86	5082.28	4974.04	5183.31	5039.04	1823.06	1726.97	1688.52	1528.03	1439.22	1520.5	18.31	17.03	16.6	15.4	14.29	14.96	1621.06	-0.222292	0.0758501	-2.93067	0.00338231	0.049302
ENSG00000159063.12	ALG8	protein_coding	ALG8, alpha-1,3-glucosyltransferase [Source:HGNC Symbol;Acc:HGNC:23161]	1212.83	1285.92	1271.19	1226.74	1190.14	1313.05	1970.98	1988.93	2110.84	1725.32	1848.92	1603.9	79.77	79.01	83.66	70.11	74	63.6	1874.81	-0.232497	0.0793414	-2.93034	0.0033859	0.049302
ENSG00000114062.18	UBE3A	protein_coding	ubiquitin protein ligase E3A [Source:HGNC Symbol;Acc:HGNC:12496]	3496.89	3407.18	3997.09	3391.69	3678.48	3470.63	2442.44	2712.06	2554.3	2361.92	2045.12	2159.5	34.61	37.71	35.45	33.61	28.66	29.99	2379.2	-0.229927	0.0784756	-2.92992	0.00339052	0.0493147
ENSG00000173320.11	STOX2	protein_coding	storkhead box 2 [Source:HGNC Symbol;Acc:HGNC:25450]	3546.99	7707.92	6219.57	5188.06	6456.23	4422.04	182.294	107.438	128.008	89.6934	69.9636	89.0019	1.7	0.99	1.17	0.85	0.64	0.8	111.132	-0.739075	0.252317	-2.92916	0.00339881	0.0493806
ENSG00000102780.16	DGKH	protein_coding	diacylglycerol kinase eta [Source:HGNC Symbol;Acc:HGNC:2854]	12583.3	13455.8	11765.3	11901.9	12446	11126	1780.3	1774.87	2003.15	1561.58	1410.38	1669.15	7.38	7.22	8.14	6.5	5.78	6.78	1699.92	-0.258619	0.088319	-2.92823	0.00340893	0.049463
ENSG00000148400.9	NOTCH1	protein_coding	notch 1 [Source:HGNC Symbol;Acc:HGNC:7881]	9192.54	9010.72	8921.68	8991.93	9189.2	8683.33	1413.2	1176.48	1186.29	1014.71	994.667	1090.81	7.94	6.49	6.53	5.72	5.53	6	1146.05	-0.28459	0.0971976	-2.92795	0.00341202	0.049463
ENSG00000166747.12	AP1G1	protein_coding	adaptor related protein complex 1 gamma 1 subunit [Source:HGNC Symbol;Acc:HGNC:555]	4319.85	4449.69	4743.55	4484.8	4048.85	4015.56	7860.48	8130.87	7968.99	8390.27	9396.56	9553.18	91.65	93.04	91	98.22	108.34	109.11	8550.01	0.19029	0.0649987	2.9276	0.00341591	0.0494649
ENSG00000109854.13	HTATIP2	protein_coding	HIV-1 Tat interactive protein 2 [Source:HGNC Symbol;Acc:HGNC:16637]	1016.13	1002.65	1029.05	1008.5	1023.02	992.431	2016.39	2270.89	2169.81	2399.55	2518.26	2579.99	100.76	111.37	106.18	120.37	124.44	126.3	2325.81	0.216507	0.0740316	2.92453	0.00344979	0.0499004
ENSG00000119242.8	CCDC92	protein_coding	coiled-coil domain containing 92 [Source:HGNC Symbol;Acc:HGNC:29563]	1857.98	1788.74	1828.9	1806.98	1743.92	1838.92	746.751	682.346	726.238	861.167	896.902	850.809	20.86	18.7	19.86	24.14	24.78	23.28	794.044	0.272908	0.0933899	2.92224	0.00347522	0.0502129
ENSG00000241343.9	RPL36A	protein_coding	ribosomal protein L36a [Source:HGNC Symbol;Acc:HGNC:10359]	265.842	258.962	260.33	264.64	262.981	262.759	16661.8	16537.2	17323.5	14936.4	14709.5	15604.2	3208.79	3125.67	3266.67	2887.46	2801.16	2943.7	15962.1	-0.158959	0.0544102	-2.92149	0.00348361	0.0502788
ENSG00000090013.9	BLVRB	protein_coding	biliverdin reductase B [Source:HGNC Symbol;Acc:HGNC:1063]	693.76	687.525	689.567	692.033	690.476	690.564	3547.85	2997.91	3262.58	3565.1	4023.17	3938.2	259.76	215.43	233.9	262.01	291.26	282.45	3555.78	0.231967	0.0794191	2.92079	0.00349142	0.0503363
ENSG00000185404.16	SP140L	protein_coding	SP140 nuclear body protein like [Source:HGNC Symbol;Acc:HGNC:25105]	2009.04	1973.77	2204.49	2114.34	2217.37	2092.68	838.851	886.017	786.189	1008.38	1014.44	987.658	20.2	20.94	18.54	24.38	24.16	23.29	920.255	0.263497	0.090255	2.91947	0.00350629	0.0504952
ENSG00000187676.7	B3GLCT	protein_coding	beta 3-glucosyltransferase [Source:HGNC Symbol;Acc:HGNC:20207]	4075.54	4068.37	4071.72	4072.74	4072.2	4071.97	160.006	148.56	160.285	106.344	100.921	107.001	1.99	1.81	1.95	1.33	1.24	1.3	130.52	-0.576483	0.197562	-2.91798	0.00352303	0.0506807
ENSG00000129354.11	AP1M2	protein_coding	adaptor related protein complex 1 mu 2 subunit [Source:HGNC Symbol;Acc:HGNC:558]	1441.41	1441.28	1409.31	1393.06	1462.49	1461.8	4375.61	4339.78	4502.69	4984.51	4903.95	4958	154.23	150.13	155.41	176.35	170.92	171.18	4677.41	0.167376	0.05737	2.91748	0.00352876	0.0507076
ENSG00000154217.14	PITPNC1	protein_coding	phosphatidylinositol transfer protein, cytoplasmic 1 [Source:HGNC Symbol;Acc:HGNC:21045]	1692.19	1662.59	1626.65	1644.12	1642.87	1637.77	1282.52	1255.55	1350.74	1100.36	1118.29	1088.44	39.29	37.73	40.51	33.82	33.88	32.66	1199.32	-0.235202	0.080688	-2.91495	0.00355744	0.0510638
ENSG00000186193.8	SAPCD2	protein_coding	suppressor APC domain containing 2 [Source:HGNC Symbol;Acc:HGNC:28055]	3669.54	3662.37	3665.72	3666.74	3666.2	3665.97	2988.3	2495.15	2873.59	2354.57	2239.09	2478.19	41.22	33.77	38.81	32.6	30.54	33.48	2571.48	-0.240827	0.0826804	-2.91275	0.00358266	0.0513697
ENSG00000126217.20	MCF2L	protein_coding	MCF.2 cell line derived transforming sequence like [Source:HGNC Symbol;Acc:HGNC:14576]	3010.17	3220.24	3733.36	3074.82	3585.75	2970.85	947.486	841.282	678.85	1055.98	977.901	1088.49	14.72	12.82	10.34	16.48	15.03	16.54	931.623	0.342899	0.117804	2.91076	0.00360555	0.0516415
ENSG00000106692.13	FKTN	protein_coding	fukutin [Source:HGNC Symbol;Acc:HGNC:3622]	3789.43	4010.02	3987.95	3708.39	4090.36	4901.41	1371.06	1369.88	1402.6	1309.25	1077.61	866.185	17.06	16.73	17.09	16.35	13.26	10.55	1232.78	-0.353651	0.121658	-2.90692	0.0036501	0.0522227
ENSG00000075223.13	SEMA3C	protein_coding	semaphorin 3C [Source:HGNC Symbol;Acc:HGNC:10725]	4506.94	4607.14	4371.06	4304.58	4466.78	4299.79	7134.29	8574.44	8539.93	7020.19	7104.67	6644.97	81.53	96.17	95.57	80.53	80.28	74.39	7503.12	-0.223686	0.0770132	-2.90451	0.00367824	0.052564
ENSG00000116299.16	KIAA1324	protein_coding	KIAA1324 [Source:HGNC Symbol;Acc:HGNC:29618]	3039.93	3173.33	2985.4	3035.88	3027.34	2987.94	906.881	964.156	985.423	1127.83	1230.07	1074.85	15.09	15.73	16.03	18.83	20.22	17.5	1048.19	0.262623	0.0904451	2.90367	0.00368812	0.052564
ENSG00000136193.16	SCRN1	protein_coding	secernin 1 [Source:HGNC Symbol;Acc:HGNC:22192]	4843	4912.5	4887.16	4915.91	4872.99	4793.5	7950.88	8482.48	8531.52	9002.19	9439.25	9747.49	82.54	86.43	86.73	93.82	96.9	99.13	8858.95	0.175344	0.0603901	2.90352	0.00368997	0.052564
ENSG00000140853.15	NLRC5	protein_coding	NLR family CARD domain containing 5 [Source:HGNC Symbol;Acc:HGNC:29933]	2300.55	2694.28	2556.49	2288.68	2456.19	3023.1	306.812	209.451	174.914	436.597	360.584	267.078	6.11	4.11	3.41	8.72	7.1	5.2	292.538	0.617827	0.212742	2.90411	0.00368294	0.052564
ENSG00000006062.14	MAP3K14	protein_coding	mitogen-activated protein kinase kinase kinase 14 [Source:HGNC Symbol;Acc:HGNC:6853]	3704.7	3567.69	3728.66	3802.29	3581.52	3830.79	327.216	280.926	351.808	212.299	225.283	262.79	4.46	3.77	4.71	2.91	3.05	3.51	276.721	-0.453486	0.156263	-2.90208	0.00370695	0.0526859
ENSG00000101310.14	SEC23B	protein_coding	Sec23 homolog B, coat complex II component [Source:HGNC Symbol;Acc:HGNC:10702]	2825.51	2861.26	2923.1	2938.24	2776.43	2790.02	3857.18	4008.83	4089.52	4247.07	4693.81	4761.17	68.4	69.77	71	75.6	82.3	82.7	4276.25	0.19661	0.067755	2.90177	0.00371056	0.0526859
ENSG00000132199.18	ENOSF1	protein_coding	enolase superfamily member 1 [Source:HGNC Symbol;Acc:HGNC:30365]	1866.2	1963.38	1699.25	1947.67	1707.24	1780.81	1350.58	1167.53	1134.42	978.153	1055.46	992.384	37.44	31.75	30.8	27.22	28.89	26.94	1113.12	-0.274415	0.0945568	-2.90212	0.0037065	0.0526859
ENSG00000100439.10	ABHD4	protein_coding	abhydrolase domain containing 4 [Source:HGNC Symbol;Acc:HGNC:20154]	2902.31	2777.52	2572.7	2953.61	3044.99	2503.27	507.076	552.185	581.365	594.711	685.606	885.175	9.21	9.85	10.33	10.84	12.31	15.74	634.313	0.401739	0.13857	2.89917	0.00374148	0.0529532
ENSG00000105887.10	MTPN	protein_coding	myotrophin [Source:HGNC Symbol;Acc:HGNC:15667]	3192.33	3223.61	3266.51	3196.88	3181.61	3129.1	6706.32	7363.52	7425.83	6432.42	6253.13	6278.39	106.04	114.27	114.96	102.08	97.77	97.25	6743.27	-0.180746	0.062337	-2.8995	0.00373757	0.0529532
ENSG00000148248.13	SURF4	protein_coding	surfeit 4 [Source:HGNC Symbol;Acc:HGNC:11476]	2718.64	2715.98	2762.57	2692.79	2685.74	2689.74	8156.23	8062.9	8291.32	8762.59	9199.07	9604.73	152.14	147.61	151.45	164.07	169.68	175.51	8679.46	0.169603	0.0584912	2.89963	0.00373599	0.0529532
ENSG00000099917.17	MED15	protein_coding	mediator complex subunit 15 [Source:HGNC Symbol;Acc:HGNC:14248]	2621.23	2570.87	2596.58	2639.25	2543.59	2588.96	1698.87	1537.15	1548.65	1776.61	1897.35	1928.32	33.12	29.41	29.58	34.78	36.59	36.83	1731.15	0.227409	0.0784625	2.89832	0.00375173	0.0530205
ENSG00000162616.8	DNAJB4	protein_coding	DnaJ heat shock protein family (Hsp40) member B4 [Source:HGNC Symbol;Acc:HGNC:14886]	1919.82	1868.51	1938.85	1673.66	1710.07	1609.98	168.823	197.768	181.498	263.134	242.623	246.839	4.79	5.51	5.04	7.49	6.81	6.86	216.781	0.460967	0.159058	2.8981	0.00375431	0.0530205
ENSG00000164466.12	SFXN1	protein_coding	sideroflexin 1 [Source:HGNC Symbol;Acc:HGNC:16085]	1567.27	1793.37	1775.13	1700.65	1738.76	1610.54	4834.34	4123.09	4431.6	5199.29	4912.93	5408.73	144.16	120.67	129.41	155.64	144.88	158.02	4818.32	0.213532	0.0737178	2.89661	0.00377214	0.0532151
ENSG00000137154.12	RPS6	protein_coding	ribosomal protein S6 [Source:HGNC Symbol;Acc:HGNC:10429]	819.078	825.517	815.931	811.251	817.84	821.376	30258.4	31976.4	34558.6	27532.1	28554.4	29255.9	1869.4	1938.89	2090.63	1707.4	1744.36	1770.56	30356	-0.181732	0.0627534	-2.89598	0.00377982	0.0532663
ENSG00000052802.12	MSMO1	protein_coding	methylsterol monooxygenase 1 [Source:HGNC Symbol;Acc:HGNC:10545]	1982.97	1974.32	1976.52	1965.37	1950.96	1925.27	1028.82	1080.03	1274.69	1399.96	1314.33	1387.05	26.51	27.31	32.16	36.21	33.49	35.01	1247.47	0.276851	0.0959243	2.88614	0.00390002	0.0549013
ENSG00000120306.9	CYSTM1	protein_coding	cysteine rich transmembrane module containing 1 [Source:HGNC Symbol;Acc:HGNC:30239]	938.289	917.039	1039.3	941.132	995.911	889.833	799.809	784.774	688.853	849.029	945.743	996.495	42.47	40.9	35.82	45.25	49.66	51.84	844.118	0.298809	0.103666	2.88244	0.00394614	0.0554317
ENSG00000173467.8	AGR3	protein_coding	anterior gradient 3, protein disulphide isomerase family member [Source:HGNC Symbol;Acc:HGNC:24167]	423.036	457.992	404.61	429.592	429.311	433.992	427.107	472.787	530.518	369.471	410.573	269.96	50.29	54.64	61.16	43.67	47.8	31.14	413.403	-0.454549	0.157687	-2.88261	0.00394398	0.0554317
ENSG00000108771.12	DHX58	protein_coding	DExH-box helicase 58 [Source:HGNC Symbol;Acc:HGNC:29517]	1488.6	1594.99	1406.7	1269.93	1367.87	1716.81	124.813	122.952	112.85	209.718	196.249	143.06	4.31	4.16	3.81	7.26	6.7	4.83	151.612	0.594863	0.206664	2.87841	0.00399683	0.0560835
ENSG00000143373.17	ZNF687	protein_coding	zinc finger protein 687 [Source:HGNC Symbol;Acc:HGNC:29277]	4293.78	4465.41	4305.81	4474.41	4248.53	4130.13	3605.76	3209.03	3381	3708.63	3919.69	4152.67	42.24	36.89	38.77	43.6	45.39	47.64	3662.78	0.208279	0.0723675	2.87808	0.00400109	0.0560835
ENSG00000142611.16	PRDM16	protein_coding	PR/SET domain 16 [Source:HGNC Symbol;Acc:HGNC:14000]	5776.51	4957.9	4171.64	5533.48	8286.2	6051.46	120.731	115.276	169.487	110.043	38.6581	68.8496	1.08	1.01	1.48	0.99	0.34	0.6	103.867	-0.907856	0.315523	-2.8773	0.00401094	0.0561617
ENSG00000091039.16	OSBPL8	protein_coding	oxysterol binding protein like 8 [Source:HGNC Symbol;Acc:HGNC:16396]	5033.72	5004.87	4477.19	4474.78	4738.81	4899.41	2019.9	2182.64	2629.43	2033.34	1785.06	1782.11	21.44	22.73	27.31	21.65	18.74	18.52	2072.03	-0.287208	0.0999156	-2.87451	0.00404658	0.0564201
ENSG00000117632.22	STMN1	protein_coding	stathmin 1 [Source:HGNC Symbol;Acc:HGNC:6510]	915.72	911.133	904.802	901.249	906.08	889.804	5495.86	5493.78	5977.65	5212.6	4878.95	4804.5	307.17	301.34	327.12	292.43	269.62	263.05	5310.56	-0.188288	0.0654967	-2.87477	0.00404323	0.0564201
ENSG00000133321.10	RARRES3	protein_coding	retinoic acid receptor responder 3 [Source:HGNC Symbol;Acc:HGNC:9869]	567.711	563.044	566.875	567.577	562.022	563.709	157.618	180.823	183.668	219.302	284.16	234.197	14.1	15.88	16.09	19.7	25.14	20.53	209.96	0.49393	0.171818	2.87472	0.00404382	0.0564201
ENSG00000169679.14	BUB1	protein_coding	BUB1 mitotic checkpoint serine/threonine kinase [Source:HGNC Symbol;Acc:HGNC:1148]	3152.59	3055.15	3176.16	3160.17	3185.91	3169.36	1824.05	1838.48	1799.83	1677.88	1541.82	1431.81	29.28	28.97	28.3	27.04	24.47	22.53	1685.64	-0.232908	0.0810166	-2.87482	0.00404261	0.0564201
ENSG00000149182.14	ARFGAP2	protein_coding	ADP ribosylation factor GTPase activating protein 2 [Source:HGNC Symbol;Acc:HGNC:13504]	1895.93	1962.54	1942.34	1945.41	1887.92	1862.07	3411.74	3063.52	3173.66	3563.15	3689.45	3804.04	90.06	79.37	82.02	94.41	96.29	98.36	3450.91	0.196265	0.0683061	2.87332	0.00406179	0.0564782
ENSG00000165688.11	PMPCA	protein_coding	peptidase, mitochondrial processing alpha subunit [Source:HGNC Symbol;Acc:HGNC:18667]	1525.63	1369.35	1323.44	1572.53	1449.19	1509.25	2979.74	2868.7	3122.85	2498.02	2626.06	2697.13	103.52	97.81	106.24	87.11	90.21	91.79	2798.76	-0.198371	0.0690277	-2.87379	0.00405576	0.0564782
ENSG00000181649.5	PHLDA2	protein_coding	pleckstrin homology like domain family A member 2 [Source:HGNC Symbol;Acc:HGNC:12385]	776.55	769.37	772.72	773.74	773.2	772.97	275.621	226.558	257.051	337.064	309.455	369.241	18.03	14.54	16.46	22.13	20.01	23.66	295.829	0.421162	0.146584	2.87318	0.00406365	0.0564782
ENSG00000150893.10	FREM2	protein_coding	FRAS1 related extracellular matrix protein 2 [Source:HGNC Symbol;Acc:HGNC:25396]	15891.5	15524.2	15475.4	15888.7	15888.2	15153.1	5815.1	6046.41	7055.9	4984.49	4868.91	5937.82	18.81	19.19	22.35	16.18	15.57	18.81	5784.78	-0.260264	0.0906668	-2.87055	0.00409753	0.056889
ENSG00000182836.9	PLCXD3	protein_coding	phosphatidylinositol specific phospholipase C X domain containing 3 [Source:HGNC Symbol;Acc:HGNC:31822]	7474.13	7445.15	7435.05	7450.42	7419.86	7436.62	1349.77	1299.28	1427.54	1266.57	1047.55	1061.16	9.17	8.66	9.5	8.64	7.04	7.06	1241.98	-0.272987	0.0951906	-2.8678	0.00413341	0.0573265
ENSG00000117305.14	HMGCL	protein_coding	3-hydroxymethyl-3-methylglutaryl-CoA lyase [Source:HGNC Symbol;Acc:HGNC:5005]	1399.72	1386.38	1400.31	1408.51	1412.56	1392.41	874.137	862.653	858.135	1103.07	989.56	1005.16	31.58	30.59	30.35	39.99	35.34	35.56	948.781	0.255659	0.0892326	2.86508	0.00416905	0.0577598
ENSG00000145217.13	SLC26A1	protein_coding	solute carrier family 26 member 1 [Source:HGNC Symbol;Acc:HGNC:10993]	2890.06	1965.03	2281.06	2252.36	1417.71	2881.12	170.146	167.559	159.079	207.396	309.525	215.082	3.88	3.75	3.56	4.74	6.98	4.81	204.789	0.534435	0.186571	2.8645	0.00417662	0.0578037
ENSG00000239521.7	GATS	protein_coding	GATS, stromal antigen 3 opposite strand [Source:HGNC Symbol;Acc:HGNC:29954]	1796.78	2061.12	2015.71	1815.42	1851.53	2198.8	358.604	314.256	309.472	441.083	456.608	385.583	9.3	7.99	7.85	11.47	11.7	9.79	377.603	0.381021	0.133138	2.86185	0.00421176	0.0582287
ENSG00000012048.20	BRCA1	protein_coding	BRCA1, DNA repair associated [Source:HGNC Symbol;Acc:HGNC:1100]	4254.87	4147.92	3878.37	4206.33	4037.51	4225.67	1730.63	1824.44	1993.62	1625.94	1620.11	1441.66	21.23	21.97	23.96	20.03	19.65	17.32	1706.12	-0.245867	0.085972	-2.85985	0.00423846	0.0584451
ENSG00000159055.3	MIS18A	protein_coding	MIS18 kinetochore protein A [Source:HGNC Symbol;Acc:HGNC:1286]	1357.43	1339.65	1327.7	1358.37	1371.1	1326.88	771.97	888.435	978.771	714.728	705.816	714.608	28.98	32.74	35.98	26.94	26.2	26.28	795.724	-0.305958	0.107003	-2.85934	0.00424521	0.0584451
ENSG00000182580.2	EPHB3	protein_coding	EPH receptor B3 [Source:HGNC Symbol;Acc:HGNC:3394]	3607.98	4050.37	3580.77	2820.7	2736.54	3433.7	352.553	222.326	310.496	457.9	431.879	358.257	5.34	3.3	4.6	6.96	6.46	5.31	355.573	0.488158	0.170724	2.85934	0.00424518	0.0584451
ENSG00000205413.7	SAMD9	protein_coding	sterile alpha motif domain containing 9 [Source:HGNC Symbol;Acc:HGNC:1348]	6672.11	6666.37	6658.14	6648.57	6667.79	6660.85	1716.5	2399.38	1956.69	2471.82	2979.51	2240.91	13.03	17.87	14.54	18.83	22.36	16.66	2294.14	0.340636	0.119127	2.85943	0.00424403	0.0584451
ENSG00000090889.11	KIF4A	protein_coding	kinesin family member 4A [Source:HGNC Symbol;Acc:HGNC:13339]	4011.28	4056.57	4085.71	4029.49	4120.16	4165.97	1685.94	1627.56	1778.55	1441.69	1498.31	1444.7	20.91	19.81	21.6	17.95	18.37	17.55	1579.46	-0.21753	0.0761071	-2.85822	0.00426031	0.0585415
ENSG00000147144.12	CCDC120	protein_coding	coiled-coil domain containing 120 [Source:HGNC Symbol;Acc:HGNC:28910]	3218.05	3080	3216.29	3136.3	3116	3116.44	555.596	553.314	486.581	632.748	678.105	661.428	8.92	8.73	7.65	10.21	10.78	10.41	594.636	0.307395	0.10755	2.85815	0.00426113	0.0585415
ENSG00000135486.17	HNRNPA1	protein_coding	heterogeneous nuclear ribonucleoprotein A1 [Source:HGNC Symbol;Acc:HGNC:5031]	1152.64	1166.1	1150.59	1145.96	1138.42	1146.62	36211.1	37864.8	38176.7	33827.6	33943.2	33798	1592.19	1634.07	1643.68	1493.03	1475.79	1455.76	35636.9	-0.14438	0.0505301	-2.8573	0.00427264	0.0586383
ENSG00000255154.7	HTD2	protein_coding	hydroxyacyl-thioester dehydratase type 2 [Source:HGNC Symbol;Acc:HGNC:53111]	1190.17	1091.08	1198.86	1205.37	1084.35	1217.57	147.675	138.913	144.286	102.644	75.0647	100.663	6.41	5.92	6.16	4.48	3.22	4.28	118.209	-0.617881	0.216302	-2.85656	0.00428256	0.0587131
ENSG00000151458.11	ANKRD50	protein_coding	ankyrin repeat domain 50 [Source:HGNC Symbol;Acc:HGNC:29223]	8615.54	8608.37	8611.72	8612.74	8612.2	8253.89	7931.25	9100.81	9101.72	9697.35	9923.53	10293.4	46.9	52.82	52.7	57.56	58.02	59.62	9341.31	0.195047	0.0682903	2.85614	0.00428824	0.0587297
ENSG00000102401.19	ARMCX3	protein_coding	armadillo repeat containing, X-linked 3 [Source:HGNC Symbol;Acc:HGNC:24065]	2336.06	2366.35	2416.09	2329.03	2351.43	2257.41	2513.71	2986.46	2684.57	3123.58	3309.43	3106.84	54.27	63.28	56.75	67.69	70.64	65.71	2954.1	0.221274	0.077531	2.85401	0.00431718	0.0589416
ENSG00000162645.12	GBP2	protein_coding	guanylate binding protein 2 [Source:HGNC Symbol;Acc:HGNC:4183]	1885.31	1818.82	1952.49	1937.18	1989.53	1991.68	607.019	845.602	733.453	826.624	1079.85	919.635	15.92	21.76	18.84	21.76	28.01	23.63	835.379	0.371354	0.130107	2.85422	0.0043143	0.0589416
ENSG00000280987.4	MATR3	protein_coding	matrin 3 [Source:NCBI gene;Acc:9782]	4198.54	4452.37	4109.34	4599.95	4017.8	4290.78	616.095	614.441	769.799	571.926	466.607	518.201	7.29	7.14	8.92	6.79	5.45	6	592.856	-0.36038	0.12627	-2.85403	0.00431679	0.0589416
ENSG00000088325.15	TPX2	protein_coding	TPX2, microtubule nucleation factor [Source:HGNC Symbol;Acc:HGNC:1249]	3319.36	3311.37	3314.72	3315.99	3315.54	3315.63	5156.41	4991.35	5635.46	4824.13	4488.95	4461.8	78.64	74.72	84.16	73.86	67.7	66.66	4926.35	-0.196946	0.0690457	-2.8524	0.00433903	0.0591171
ENSG00000124788.17	ATXN1	protein_coding	ataxin 1 [Source:HGNC Symbol;Acc:HGNC:10548]	7226.11	7695.13	7468.63	7225.24	7028.3	7482.82	1017.05	962.218	974.142	858.066	841.662	769.508	7	6.5	6.56	5.93	5.73	5.19	903.768	-0.260964	0.0914815	-2.85265	0.00433566	0.0591171
ENSG00000114779.19	ABHD14B	protein_coding	abhydrolase domain containing 14B [Source:HGNC Symbol;Acc:HGNC:28235]	1495.99	1494.68	1490.8	1528.74	1533.32	1514.28	711.187	637.36	647.468	798.827	774.998	853.306	23.82	20.96	21.24	26.86	25.67	28	737.192	0.283602	0.0994636	2.85132	0.00435384	0.059238
ENSG00000181444.12	ZNF467	protein_coding	zinc finger protein 467 [Source:HGNC Symbol;Acc:HGNC:23154]	1634.94	1570.9	1552.07	1571.35	1565.7	1665.02	1011.89	760.507	784.228	1102.09	1026.7	1070.45	32.13	23.7	24.38	35.12	32.23	33.29	959.306	0.32232	0.113051	2.85109	0.00435693	0.059238
ENSG00000180891.12	CUEDC1	protein_coding	CUE domain containing 1 [Source:HGNC Symbol;Acc:HGNC:31350]	2247.39	1768.37	1903.35	2197.88	1838.88	1962.88	1398.77	1930.77	1464.29	1073.59	1462.41	1181.5	35.73	48.41	36.64	27.55	36.95	29.58	1418.53	-0.367152	0.128801	-2.85054	0.00436451	0.0592798
ENSG00000069424.14	KCNAB2	protein_coding	potassium voltage-gated channel subfamily A regulatory beta subunit 2 [Source:HGNC Symbol;Acc:HGNC:6229]	2673.75	2716.17	3038.97	2623.01	2488.81	2910.43	452.7	400.567	385.254	526.67	572.457	485.24	8.38	7.26	6.98	9.77	10.46	8.79	470.491	0.351098	0.123242	2.84885	0.00438771	0.0595333
ENSG00000065183.15	WDR3	protein_coding	WD repeat domain 3 [Source:HGNC Symbol;Acc:HGNC:12755]	2828.83	3146.62	3225.43	3082.62	3149.38	3071.56	2156.4	2144.75	2275.44	1903.05	1813	1979.7	35.38	34.54	36.56	31.35	29.42	31.82	2045.38	-0.206576	0.0725306	-2.84812	0.00439777	0.0596081
ENSG00000081760.16	AACS	protein_coding	acetoacetyl-CoA synthetase [Source:HGNC Symbol;Acc:HGNC:21298]	3109.66	3052.58	3082.93	3071.45	3127.26	3058.94	2225.05	2222.73	2229.46	2423.7	2586.13	2624.96	36.49	35.77	35.8	39.9	41.93	42.16	2385.32	0.193435	0.0680175	2.8439	0.00445645	0.0603412
ENSG00000166377.19	ATP9B	protein_coding	ATPase phospholipid transporting 9B (putative) [Source:HGNC Symbol;Acc:HGNC:13541]	2208.45	1843.76	1725.47	2127.93	2430.25	2103.34	258.246	339.26	336.332	235.055	189.347	243.986	6.34	8.17	8.1	5.79	4.59	5.87	267.081	-0.476765	0.167671	-2.84345	0.00446277	0.0603646
ENSG00000133706.17	LARS	protein_coding	leucyl-tRNA synthetase [Source:HGNC Symbol;Acc:HGNC:6512]	3027.34	3240.55	3147.21	2852.63	3110.63	3099.58	3950.94	3858.26	4068.79	3742.3	3257.5	3315.78	64.92	62.24	65.47	61.72	52.94	53.38	3698.91	-0.203906	0.0717206	-2.84306	0.00446828	0.0603769
ENSG00000130513.6	GDF15	protein_coding	growth differentiation factor 15 [Source:HGNC Symbol;Acc:HGNC:30142]	1020.62	1012.45	1015.27	1018.74	1016.32	1016.87	813.859	1088.85	962.98	1116.17	1942.52	1901.17	40.48	53.15	46.9	55.72	95.53	92.63	1304.25	0.791556	0.278499	2.84222	0.00448007	0.0604741
ENSG00000090020.10	SLC9A1	protein_coding	solute carrier family 9 member A1 [Source:HGNC Symbol;Acc:HGNC:11071]	3441.15	3649.28	3180.24	3380.44	3723.77	3362.75	2661.6	2218.19	2699.64	3040.69	2755.17	3272.83	38.99	31.9	38.73	44.72	39.91	46.97	2774.67	0.259014	0.0911442	2.84181	0.00448589	0.0604904
ENSG00000188997.7	KCTD21	protein_coding	potassium channel tetramerization domain containing 21 [Source:HGNC Symbol;Acc:HGNC:27452]	3347.71	3072.99	3163.55	3010.36	3121.48	2712.4	498.71	524.396	530.713	589.642	613.139	776.278	8.23	8.5	8.57	9.77	9.99	12.55	588.819	0.352285	0.124016	2.84065	0.00450212	0.060647
ENSG00000104983.8	CCDC61	protein_coding	coiled-coil domain containing 61 [Source:HGNC Symbol;Acc:HGNC:33629]	985.349	946.429	1084.94	961.328	1168.67	923.237	175.868	129.128	112.838	82.2418	81.2516	96.3183	8.82	6.36	5.54	4.14	4.03	4.73	112.939	-0.680937	0.240036	-2.83682	0.00455657	0.0612549
ENSG00000139687.13	RB1	protein_coding	RB transcriptional corepressor 1 [Source:HGNC Symbol;Acc:HGNC:9884]	3920.71	4608.94	4518.66	4610.85	4534.35	4568.93	2359.49	2229.99	2333.46	2023.41	2027.32	2010.97	26.79	24.85	25.95	23.06	22.76	22.37	2164.11	-0.192116	0.0677221	-2.83683	0.0045564	0.0612549
ENSG00000153094.22	BCL2L11	protein_coding	BCL2 like 11 [Source:HGNC Symbol;Acc:HGNC:994]	4130.3	3848.64	4366.51	3913.34	4492.46	3407.87	3199.23	4294.81	3278.37	2865.71	2695.43	3191.88	40.34	53.16	40.49	36.28	33.62	39.42	3254.25	-0.298063	0.105164	-2.83425	0.00459329	0.0616485
ENSG00000234678.1	ELF3-AS1	antisense_RNA	ELF3 antisense RNA 1 [Source:HGNC Symbol;Acc:HGNC:40211]	567.521	529.955	605.74	528.281	566.992	549.602	44.4308	67.9258	37.2501	81.6173	84.6645	98.5757	4.04	6	3.32	7.4	7.56	8.78	69.0778	0.848022	0.299219	2.83412	0.00459524	0.0616485
ENSG00000167460.14	TPM4	protein_coding	tropomyosin 4 [Source:HGNC Symbol;Acc:HGNC:12013]	2383.94	2385.87	2332.98	2402.98	2373.24	2377.14	20243.5	21594.3	22806.3	19030.4	18953.4	19502.1	430.83	451.06	475.28	406.56	398.85	406.58	20355	-0.169357	0.0597719	-2.83339	0.00460566	0.0617253
ENSG00000112159.11	MDN1	protein_coding	midasin AAA ATPase 1 [Source:HGNC Symbol;Acc:HGNC:18302]	9107.78	9512.99	9104.61	9333.62	9864.49	10029.3	3449.7	3364.37	3511.68	3144.52	2805.31	3072.25	18.39	17.6	18.33	16.82	14.79	16.04	3224.62	-0.194064	0.0685123	-2.83254	0.00461795	0.0617918
ENSG00000205220.11	PSMB10	protein_coding	proteasome subunit beta 10 [Source:HGNC Symbol;Acc:HGNC:9538]	671.359	654.18	665.264	727.852	716.337	715.214	1219.15	1225.68	1293.34	1351.64	1539.71	1525.6	89.17	88.01	92.67	99.3	111.43	109.35	1359.18	0.239892	0.0846958	2.8324	0.00462003	0.0617918
ENSG00000178184.15	PARD6G	protein_coding	par-6 family cell polarity regulator gamma [Source:HGNC Symbol;Acc:HGNC:16076]	1802.66	2363.84	2014.94	2353.62	3686.2	1945.83	154.143	124.136	135.317	100.435	51.037	95.2441	3.39	2.68	2.92	2.22	1.11	2.06	110.025	-0.7487	0.264606	-2.8295	0.00466214	0.0622915
ENSG00000085063.14	CD59	protein_coding	CD59 molecule (CD59 blood group) [Source:HGNC Symbol;Acc:HGNC:1689]	1338.7	1289.43	1369.2	1284.62	1228.21	1285.27	3964.83	5425.23	4761.07	5375.4	6276.64	5537.7	154.41	207.35	181.56	210.15	241.7	211.26	5223.47	0.280636	0.0993135	2.82576	0.00471689	0.062959
ENSG00000100316.15	RPL3	protein_coding	ribosomal protein L3 [Source:HGNC Symbol;Acc:HGNC:10332]	1075	1065.02	1062.5	1075.69	1064.59	1082.61	32931	32734.9	34397.5	28243.5	29753.5	31313.7	1555	1517.07	1590.44	1338.72	1389.2	1448.45	31562.4	-0.164054	0.0581486	-2.82129	0.00478309	0.063713
ENSG00000152518.7	ZFP36L2	protein_coding	ZFP36 ring finger protein like 2 [Source:HGNC Symbol;Acc:HGNC:1108]	3517.54	3510.37	3513.72	3514.74	3514.2	3513.97	791.787	829.106	853.488	671.348	699.716	688.569	11.39	11.71	12.03	9.7	9.96	9.71	755.671	-0.265362	0.0940546	-2.82136	0.00478199	0.063713
ENSG00000006282.20	SPATA20	protein_coding	spermatogenesis associated 20 [Source:HGNC Symbol;Acc:HGNC:26125]	2137.16	2192.19	2249.56	2174.84	2095.5	2154.44	1600.66	1403.19	1280.32	1614.11	1794.92	1739.01	37.36	32.14	29.25	37.81	41.42	39.74	1572.03	0.264777	0.0939991	2.8168	0.00485044	0.0645447
ENSG00000104408.9	EIF3E	protein_coding	eukaryotic translation initiation factor 3 subunit E [Source:HGNC Symbol;Acc:HGNC:3277]	1277.7	1276.76	1296.39	1298.55	1292.53	1290.94	14636.3	16718.2	17337.4	14071.6	14414.4	14099.4	574.29	643.81	666.1	554.21	559.24	541.91	15212.9	-0.193459	0.0687261	-2.81493	0.00487885	0.0647916
ENSG00000188352.12	FOCAD	protein_coding	focadhesin [Source:HGNC Symbol;Acc:HGNC:23377]	3807.76	3844.76	4019.36	4491.31	3827.4	3861.22	1206.94	1229.09	1217.79	927.44	1071.53	1071.98	15.37	15.37	15.19	11.86	13.51	13.38	1120.79	-0.251493	0.089342	-2.81494	0.00487857	0.0647916
ENSG00000119906.11	SLF2	protein_coding	SMC5-SMC6 complex localization factor 2 [Source:HGNC Symbol;Acc:HGNC:17814]	5289.24	5416.89	5809.41	6073.77	5829.38	5695.39	1977.04	2105.04	2064.4	1703.84	1792.22	1836.71	17.6	18.4	18	15.23	15.78	16.02	1913.23	-0.204657	0.0727158	-2.81448	0.00488556	0.0648151
ENSG00000114861.18	FOXP1	protein_coding	forkhead box P1 [Source:HGNC Symbol;Acc:HGNC:3823]	3153.45	3199.56	3310.09	3517.44	3317.48	3242.56	1185.82	1010.65	1050.42	905.874	872.252	925.145	18.24	15.24	15.82	13.99	13.25	13.93	991.713	-0.264065	0.0939052	-2.81204	0.00492284	0.0650617
ENSG00000137868.18	STRA6	protein_coding	stimulated by retinoic acid 6 [Source:HGNC Symbol;Acc:HGNC:30650]	1817.39	1975.3	2350.57	2492.76	2076.52	2049.87	50.5425	57.0204	60.2138	56.5187	101.429	173.612	1.21	1.34	1.41	1.36	2.4	4.06	83.1834	0.982075	0.349141	2.81283	0.00491075	0.0650617
ENSG00000144036.15	EXOC6B	protein_coding	exocyst complex component 6B [Source:HGNC Symbol;Acc:HGNC:17085]	5475.55	5538	5732.58	5733.3	5732.26	5407.71	741.392	807.945	753.981	630.856	629.875	643.856	6.69	7.16	6.66	5.72	5.62	5.69	701.32	-0.27261	0.0969276	-2.81252	0.00491555	0.0650617
ENSG00000163029.15	SMC6	protein_coding	structural maintenance of chromosomes 6 [Source:HGNC Symbol;Acc:HGNC:20466]	4213.27	4223.98	4531.26	4455.29	4353.14	4364.57	1261.69	1348.18	1284.02	1149	1098.63	1070.18	14.64	15.36	14.6	13.39	12.62	12.17	1201.93	-0.230173	0.081855	-2.81197	0.00492396	0.0650617
ENSG00000136379.11	ABHD17C	protein_coding	abhydrolase domain containing 17C [Source:HGNC Symbol;Acc:HGNC:26925]	2189.54	2182.37	2179.65	1816.3	2166.82	2185.97	624.112	636.971	702.355	613.117	453.227	462.385	14.92	14.94	16.44	14.71	10.71	10.83	582.031	-0.364635	0.129858	-2.80796	0.00498562	0.0658102
ENSG00000105357.15	MYH14	protein_coding	myosin heavy chain 14 [Source:HGNC Symbol;Acc:HGNC:23212]	5547.32	5530.48	5692.27	5671.36	5658.91	5562.01	5781.75	5104.04	4905.54	5751.52	6183.2	6340.19	52.11	45.15	43.3	52.04	55.1	55.98	5677.68	0.210668	0.0750478	2.80711	0.00499877	0.0659175
ENSG00000213853.9	EMP2	protein_coding	epithelial membrane protein 2 [Source:HGNC Symbol;Acc:HGNC:3334]	3138.11	3466.42	3440.52	3491.56	3303.4	3233.8	9517	9492.18	8785.94	7990.66	8654.29	7943.04	143.95	140.91	130.13	121.33	129.44	117.69	8730.55	-0.177266	0.0631654	-2.80638	0.00501023	0.0660023
ENSG00000038382.18	TRIO	protein_coding	trio Rho guanine nucleotide exchange factor [Source:HGNC Symbol;Acc:HGNC:12303]	5004.08	4944.17	4710.89	4553.9	4611.1	4623.79	2934.16	3039.2	3022.1	2714.13	2581.61	2641.57	31.3	31.83	31.57	29.08	27.25	27.62	2822.1	-0.179601	0.0640567	-2.80379	0.0050506	0.0661617
ENSG00000112576.12	CCND3	protein_coding	cyclin D3 [Source:HGNC Symbol;Acc:HGNC:1585]	1768.01	1702.87	1795.66	1767.99	1689.37	1748.95	1373.45	1379.37	1393.76	1481.42	1745.86	1655.2	39.8	39.23	39.54	43.09	50	46.99	1504.83	0.234365	0.083547	2.80519	0.00502863	0.0661617
ENSG00000125037.12	EMC3	protein_coding	ER membrane protein complex subunit 3 [Source:HGNC Symbol;Acc:HGNC:23999]	856.191	937.733	972.558	903.067	895.515	837.626	3070.42	3097.79	2908.94	3212.81	3536.43	3711.09	172.64	170.97	160.19	181.36	196.61	204.44	3256.24	0.2053	0.0732207	2.80385	0.00504969	0.0661617
ENSG00000136068.14	FLNB	protein_coding	filamin B [Source:HGNC Symbol;Acc:HGNC:3755]	7070.05	6922.25	7070.97	7211.24	7075.88	7247.81	12802.7	13198.3	12695.6	10936.8	11765.5	11890.4	91.2	92.28	88.54	78.2	82.87	82.98	12214.9	-0.161661	0.0576485	-2.80426	0.0050432	0.0661617
ENSG00000152520.13	PAN3	protein_coding	PAN3 poly(A) specific ribonuclease subunit [Source:HGNC Symbol;Acc:HGNC:29991]	4307.88	4432.85	4387.9	4469.99	4497.56	4353.7	1502.48	1576.13	1462.26	1363.47	1275.28	1244.53	17.23	17.75	16.42	15.7	14.47	13.99	1404.02	-0.225116	0.0803027	-2.80334	0.00505759	0.0661617
ENSG00000158828.7	PINK1	protein_coding	PTEN induced putative kinase 1 [Source:HGNC Symbol;Acc:HGNC:14581]	2148.01	1949.8	2002.34	2109.94	2023.87	1998.3	352.735	364.676	404.363	416.04	495.843	546.337	8.75	8.87	9.82	10.37	12.16	13.28	430.001	0.379177	0.135222	2.8041	0.00504567	0.0661617
ENSG00000185615.15	PDIA2	protein_coding	protein disulfide isomerase family A member 2 [Source:HGNC Symbol;Acc:HGNC:14180]	1330.96	1493.19	955.91	1562.35	1312.12	1460.6	79.0159	45.6204	40.4141	33.0752	20.5533	20.92	2.99	1.69	1.49	1.26	0.77	0.78	39.9064	-1.14086	0.406924	-2.80363	0.00505304	0.0661617
ENSG00000163686.14	ABHD6	protein_coding	abhydrolase domain containing 6 [Source:HGNC Symbol;Acc:HGNC:21398]	2235.2	2296.37	2246.47	2226.57	1860.91	2263.04	72.4458	57.0759	53.779	103.21	127.843	82.7155	1.68	1.3	1.22	2.4	2.93	1.88	82.8479	0.759876	0.271212	2.80177	0.00508228	0.0664185
ENSG00000168675.18	LDLRAD4	protein_coding	low density lipoprotein receptor class A domain containing 4 [Source:HGNC Symbol;Acc:HGNC:1224]	1313.77	1236.15	1226.7	1560.77	1176.94	1513.51	155.726	206.039	158.558	91.5609	153.603	89.0109	5.93	7.72	5.9	3.49	5.76	3.28	142.56	-0.670255	0.239585	-2.79757	0.00514894	0.0672228
ENSG00000142937.11	RPS8	protein_coding	ribosomal protein S8 [Source:HGNC Symbol;Acc:HGNC:10441]	694.138	686.94	687.797	691.523	688.118	690.166	23184.3	24497.8	25775	21062.1	21803.5	22538.5	1699.66	1762.57	1850.19	1549.87	1580.54	1618.52	23143.5	-0.167566	0.0599165	-2.79667	0.00516328	0.0672763
ENSG00000171604.11	CXXC5	protein_coding	CXXC finger protein 5 [Source:HGNC Symbol;Acc:HGNC:26943]	1895.04	1811.1	1879.95	1898.44	1854.47	1866.82	7505.15	7674.1	7356.04	6589.09	6989.27	6580.38	203.24	203.95	195.05	179.1	187.13	174.56	7115.69	-0.161201	0.0576338	-2.79699	0.00515819	0.0672763
ENSG00000175061.17	LRRC75A-AS1	processed_transcript	LRRC75A antisense RNA 1 [Source:HGNC Symbol;Acc:HGNC:28619]	679.334	668.455	675.182	683.463	681.383	681.19	13421.2	14289.8	14678.6	12000	12739.1	12963.8	1000.74	1045.75	1071.73	898.18	939.3	946.9	13348.8	-0.169065	0.0604949	-2.7947	0.00519486	0.0676207
ENSG00000105963.13	ADAP1	protein_coding	ArfGAP with dual PH domains 1 [Source:HGNC Symbol;Acc:HGNC:16486]	1439.23	1580.57	1574.4	1476.34	1521.34	1622.3	1007.01	733.632	824.46	1029.5	1064.04	1100.07	33.19	23.74	26.61	34.06	34.68	35.5	959.776	0.315804	0.113047	2.79355	0.00521329	0.0677934
ENSG00000137959.15	IFI44L	protein_coding	interferon induced protein 44 like [Source:HGNC Symbol;Acc:HGNC:17817]	2470.18	2524.98	2558.68	2526.75	2493.65	2491.23	6677.3	6722.54	6113.98	8277.78	7430.14	6900.69	134.49	132.88	120.58	167.34	147.96	136.15	7020.39	0.212217	0.0759809	2.79303	0.00522167	0.0678352
ENSG00000142687.17	KIAA0319L	protein_coding	KIAA0319 like [Source:HGNC Symbol;Acc:HGNC:30071]	3813.09	3629.42	3954.29	3733.76	3744.55	3887.6	1546.79	1544.93	1528.33	1766.65	1775.74	1756.84	20.63	20.21	19.96	23.65	23.42	22.96	1653.22	0.197963	0.0709229	2.79125	0.0052505	0.0681424
ENSG00000197620.10	CXorf40A	protein_coding	chromosome X open reading frame 40A [Source:HGNC Symbol;Acc:HGNC:28089]	1082.05	1076.69	1072.1	1041.2	1084.06	1035.34	634.958	716.17	678.726	794.561	806.461	846.111	30.16	33.36	31.56	37.88	37.87	39.38	746.163	0.272119	0.0975172	2.79047	0.00526311	0.0682386
ENSG00000167772.11	ANGPTL4	protein_coding	angiopoietin like 4 [Source:HGNC Symbol;Acc:HGNC:16039]	1700.54	1693.37	1642.98	1697.74	1679.55	1629.88	68.5698	77.2731	69.0129	94.2683	115.329	134.205	2.07	2.29	2.04	2.86	3.45	3.97	93.1094	0.684867	0.245486	2.78984	0.00527344	0.0683051
ENSG00000177839.6	PCDHB9	protein_coding	protocadherin beta 9 [Source:HGNC Symbol;Acc:HGNC:8694]	4236.54	2597.21	2266.38	1285.04	1554.94	2505	46.7871	99.4736	111.64	203.722	166.379	104.964	1.06	2.2	2.47	4.62	3.7	2.31	122.193	0.878711	0.315104	2.78864	0.00529298	0.0684906
ENSG00000143702.15	CEP170	protein_coding	centrosomal protein 170 [Source:HGNC Symbol;Acc:HGNC:28920]	3149.37	3721.57	3810.06	3994.36	4155.07	3987.3	1127.45	974.528	976.635	924.145	794.987	810.135	15.04	12.77	12.77	12.4	10.48	10.6	934.801	-0.283241	0.101636	-2.78682	0.00532283	0.0686739
ENSG00000152990.13	ADGRA3	protein_coding	adhesion G protein-coupled receptor A3 [Source:HGNC Symbol;Acc:HGNC:13839]	4007.92	3248.93	3872.88	3633.89	3778.63	3882.06	863.647	945.374	917.91	821.315	683.883	735.121	11.7	12.57	12.18	11.18	9.17	9.77	827.843	-0.280268	0.100558	-2.78713	0.00531769	0.0686739
ENSG00000198034.10	RPS4X	protein_coding	ribosomal protein S4, X-linked [Source:HGNC Symbol;Acc:HGNC:10424]	1139.86	1172.17	1165.56	1176.38	1166.19	1155.65	25695.8	25943.5	27096.9	22738.4	23400.8	24564.7	1117.66	1107.5	1154.07	992.78	1006.44	1046.64	24906.7	-0.155263	0.0557109	-2.78694	0.00532078	0.0686739
ENSG00000039068.18	CDH1	protein_coding	cadherin 1 [Source:HGNC Symbol;Acc:HGNC:1748]	3817.05	3927.34	3907.33	3979.31	3886.64	3902	39515.6	40494.7	40937.3	35580.9	37055.5	37053.5	511.97	514.92	519.36	462.74	474.71	470.26	38439.6	-0.141067	0.0506366	-2.78586	0.00533856	0.0688092
ENSG00000178038.16	ALS2CL	protein_coding	ALS2 C-terminal like [Source:HGNC Symbol;Acc:HGNC:20605]	3592.39	3668.19	4075.55	3942.86	3913.75	4124.3	486.787	445.95	303.68	271.79	324.271	289.774	6.34	5.7	3.87	3.55	4.18	3.7	353.702	-0.478781	0.171884	-2.78549	0.00534472	0.0688211
ENSG00000184445.11	KNTC1	protein_coding	kinetochore associated 1 [Source:HGNC Symbol;Acc:HGNC:17255]	3389.52	3243.7	3564.13	3577.32	3605.96	3415.58	2223.5	2302.29	1891.48	1932.7	1770.77	1663.16	32.47	32.99	27.03	28.33	25.57	23.79	1964	-0.256966	0.0923186	-2.78348	0.005378	0.0691818
ENSG00000136205.16	TNS3	protein_coding	tensin 3 [Source:HGNC Symbol;Acc:HGNC:21616]	7011.08	7158.9	6929.29	6474.11	7033.75	7222.92	1137.37	1141.28	1255.98	1015.15	889.073	1040.79	8.25	8.13	8.93	7.4	6.38	7.4	1079.97	-0.26176	0.0940801	-2.78231	0.0053974	0.0693635
ENSG00000176953.12	NFATC2IP	protein_coding	nuclear factor of activated T-cells 2 interacting protein [Source:HGNC Symbol;Acc:HGNC:25906]	2410.07	2358.93	2423.37	2207.14	2223.82	2416.49	2280.44	2161.86	2027.82	2015.66	1784.13	1677.05	49.31	45.89	42.94	43.76	38.14	35.53	1991.17	-0.241437	0.086789	-2.78188	0.00540449	0.0693867
ENSG00000138759.18	FRAS1	protein_coding	Fraser extracellular matrix complex subunit 1 [Source:HGNC Symbol;Acc:HGNC:19185]	13882.4	14391.4	13611.7	14437.4	13374.6	14049.3	1834.1	1726.76	1824.04	1539.75	1488.02	1622.3	6.65	6.14	6.48	5.6	5.32	5.77	1672.6	-0.211546	0.0760999	-2.77985	0.00543845	0.0696611
ENSG00000157827.19	FMNL2	protein_coding	formin like 2 [Source:HGNC Symbol;Acc:HGNC:18267]	4561.72	4851.91	4932.29	4524.44	5009.82	5128.27	303.647	286.459	220.838	216.747	184.207	176.917	3.18	2.94	2.26	2.28	1.91	1.81	231.459	-0.488135	0.175606	-2.77972	0.00544062	0.0696611
ENSG00000166946.13	CCNDBP1	protein_coding	cyclin D1 binding protein 1 [Source:HGNC Symbol;Acc:HGNC:1587]	1270.89	1234.93	1269.37	1236.81	1250.72	1263.33	645.576	645.563	708.55	795.345	858.251	773.611	26.03	25.54	27.97	32.19	34.22	30.56	737.819	0.275949	0.0992748	2.77965	0.00544177	0.0696611
ENSG00000181143.15	MUC16	protein_coding	mucin 16, cell surface associated [Source:HGNC Symbol;Acc:HGNC:15582]	11616.6	11587.4	12159.7	10236.3	6388.55	10289.8	695.711	476.956	397.687	370.103	421.683	329.924	3.47	2.33	1.95	1.86	2.06	1.6	448.821	-0.500015	0.179988	-2.77805	0.0054687	0.0699376
ENSG00000156162.16	DPY19L4	protein_coding	dpy-19 like 4 (C. elegans) [Source:HGNC Symbol;Acc:HGNC:27829]	3194.74	3354.4	3332.31	3271.94	3230.83	3449.43	2694.3	2766.98	2815.76	2534.7	2427.88	2269.16	41.23	41.56	42.17	38.94	36.71	34.03	2584.78	-0.195785	0.0705169	-2.77643	0.00549596	0.0702179
ENSG00000239789.5	MRPS17	protein_coding	mitochondrial ribosomal protein S17 [Source:HGNC Symbol;Acc:HGNC:14047]	1447.9	1412.44	1496.46	1663.74	1513.29	1387.67	597.295	651.27	642.411	473.479	504.178	550.392	20.36	21.76	21.43	16.18	16.99	18.38	569.841	-0.30595	0.110264	-2.77469	0.00552539	0.0705252
ENSG00000137076.20	TLN1	protein_coding	talin 1 [Source:HGNC Symbol;Acc:HGNC:11845]	5144.31	4972.62	5138.18	4741.07	4474.89	4940.66	4042.1	3830.97	3896.8	4277.18	4455.33	4502.06	41.74	38.82	39.4	44.34	45.5	45.55	4167.43	0.169354	0.0610853	2.77243	0.00556399	0.070949
ENSG00000259781.1	HMGB1P6	processed_pseudogene	high mobility group box 1 pseudogene 6 [Source:HGNC Symbol;Acc:HGNC:4998]	467.6	460.43	463.78	464.79	464.25	464.02	4246.02	4605.1	4955.71	4028.57	4107.3	3907.67	462.58	492.46	528.67	440.61	442.44	417.05	4308.4	-0.197792	0.0713614	-2.7717	0.00557652	0.0710398
ENSG00000131941.7	RHPN2	protein_coding	rhophilin Rho GTPase binding protein 2 [Source:HGNC Symbol;Acc:HGNC:19974]	2969.14	3134.27	3033.7	2558.52	3015.03	2974.72	1153.6	1055.9	1179.14	1426.66	1253.78	1333.47	19.83	17.82	19.84	24.63	21.31	22.46	1233.77	0.243565	0.0879057	2.77076	0.00559261	0.0711757
ENSG00000078401.6	EDN1	protein_coding	endothelin 1 [Source:HGNC Symbol;Acc:HGNC:3176]	1854.54	1847.37	1850.72	1851.74	1851.2	1850.97	53.2811	146.452	103.288	121.36	213.946	205.842	1.46	3.93	2.76	3.33	5.78	5.51	140.694	0.843029	0.304411	2.76938	0.00561625	0.0714074
ENSG00000091140.13	DLD	protein_coding	dihydrolipoamide dehydrogenase [Source:HGNC Symbol;Acc:HGNC:2898]	1542.32	1572.86	1575.13	1456.83	1417.24	1550.31	4746.87	4990.35	5259.96	5912.61	5992.59	5292.43	158.14	163.16	171.59	197.71	197.4	172.72	5365.78	0.19637	0.0709657	2.76711	0.0056555	0.0717675
ENSG00000169299.13	PGM2	protein_coding	phosphoglucomutase 2 [Source:HGNC Symbol;Acc:HGNC:8906]	2701.46	2614.82	2583.82	2606.47	2517.12	2489.15	1417.85	1648.48	1760.17	1330.59	1327.81	1384.07	27.74	31.65	33.73	26.13	25.69	26.53	1478.16	-0.254975	0.0921365	-2.76736	0.00565124	0.0717675
ENSG00000134419.15	RPS15A	protein_coding	ribosomal protein S15a [Source:HGNC Symbol;Acc:HGNC:10389]	366.363	359.691	361.019	363.883	362.399	362.305	18224.6	19996.2	20858.6	17244.9	17537	17643.1	2541.48	2736.89	2848.23	2414	2418.22	2410.21	18584.1	-0.172473	0.06234	-2.76665	0.00566348	0.0717994
ENSG00000071054.16	MAP4K4	protein_coding	mitogen-activated protein kinase kinase kinase kinase 4 [Source:HGNC Symbol;Acc:HGNC:6866]	4662.56	4641.18	4808.53	4543.11	4908.71	4562.77	2510.58	2649.39	2513.47	2333.76	2194.09	2194.4	27.09	28.05	26.55	25.28	23.42	23.2	2399.26	-0.190023	0.0687471	-2.76408	0.0057083	0.0721586
ENSG00000120833.13	SOCS2	protein_coding	suppressor of cytokine signaling 2 [Source:HGNC Symbol;Acc:HGNC:19382]	1717.54	1726.9	1506.59	1427.06	1809.01	1489.28	274.161	276.125	309.174	432.94	314.257	397.323	8.63	8.55	9.52	13.67	9.76	12.25	334.004	0.414224	0.149842	2.7644	0.00570281	0.0721586
ENSG00000135549.14	PKIB	protein_coding	cAMP-dependent protein kinase inhibitor beta [Source:HGNC Symbol;Acc:HGNC:9018]	1050.14	1027.27	1036.72	1044.73	1023.46	1036.84	1562.73	1777.63	1745.23	1961.23	2136.84	1875.5	76.24	85.12	83.36	96.04	103.08	89.63	1843.19	0.230969	0.0835564	2.76423	0.00570567	0.0721586
ENSG00000096060.14	FKBP5	protein_coding	FK506 binding protein 5 [Source:HGNC Symbol;Acc:HGNC:3721]	3619.9	3617.84	3610.31	3619.23	3620.52	3614.33	1996.11	1884.9	2142.01	1799.52	1672.37	1718.15	27.91	25.87	29.32	25.25	23.12	23.53	1868.84	-0.215495	0.0780678	-2.76036	0.00577379	0.0727523
ENSG00000110514.19	MADD	protein_coding	MAP kinase activating death domain [Source:HGNC Symbol;Acc:HGNC:6766]	3902.31	4002.75	4253.89	3947.4	4082.51	4198.82	3617.92	3293.46	3190.67	4053.55	3709.28	3824.97	45.02	40.24	38.89	50.65	45.66	46.66	3614.97	0.198548	0.0719337	2.76015	0.00577742	0.0727523
ENSG00000140941.12	MAP1LC3B	protein_coding	microtubule associated protein 1 light chain 3 beta [Source:HGNC Symbol;Acc:HGNC:13352]	2316.44	2447.98	2449.94	2410.14	2366.15	2397.4	2460.95	2713.13	2638.85	2927.3	3081.53	2914.46	51.9	56.16	54.49	61.97	64.25	60.2	2789.36	0.191077	0.0692201	2.76043	0.00577261	0.0727523
ENSG00000164855.15	TMEM184A	protein_coding	transmembrane protein 184A [Source:HGNC Symbol;Acc:HGNC:28797]	3517.81	3408.47	3479.86	3788.69	2999.7	3424.85	1065.18	924.26	959.63	1010.13	1331.9	1328.67	15.71	13.38	13.87	14.96	19.42	19.2	1103.28	0.313424	0.113547	2.7603	0.00577482	0.0727523
ENSG00000139323.13	POC1B	protein_coding	POC1 centriolar protein B [Source:HGNC Symbol;Acc:HGNC:30836]	2427.19	2355.84	2411.53	2633.8	2527.83	2392.94	911.984	1050.24	993.825	779.552	846.038	839.282	18.77	21.21	20.04	16.12	17.22	16.93	903.491	-0.261716	0.0948701	-2.75868	0.0058035	0.072933
ENSG00000148735.14	PLEKHS1	protein_coding	pleckstrin homology domain containing S1 [Source:HGNC Symbol;Acc:HGNC:26285]	2586.18	2859.33	2769.53	2289.82	2923.35	2699.86	59.9943	165.635	134.281	139.55	228.182	269.94	1.13	3.07	2.48	2.64	4.26	4.99	166.262	0.832224	0.301686	2.75858	0.00580538	0.072933
ENSG00000164068.15	RNF123	protein_coding	ring finger protein 123 [Source:HGNC Symbol;Acc:HGNC:21148]	2602.18	2439.59	2703.44	2430.38	2310.43	2477.54	943.076	879.136	771.029	1016.26	1070.59	1041.19	19.15	17.51	15.32	20.72	21.48	20.72	953.556	0.271578	0.0984547	2.7584	0.00580843	0.072933
ENSG00000131979.18	GCH1	protein_coding	GTP cyclohydrolase 1 [Source:HGNC Symbol;Acc:HGNC:4193]	2471.51	2483.09	2499.19	2408.88	2421.35	2510.96	1499.16	1620	1651.21	1945.24	1830.59	1770.03	30.75	32.61	33.16	40.04	37.13	35.56	1719.37	0.216597	0.078532	2.75808	0.00581427	0.072935
ENSG00000144802.11	NFKBIZ	protein_coding	NFKB inhibitor zeta [Source:HGNC Symbol;Acc:HGNC:29805]	3149.22	3300.52	3133.58	3138.71	2873.63	3146.58	455.51	529.28	557.889	584.376	743.922	635.98	7.38	8.42	8.85	9.51	11.93	10.09	584.497	0.344552	0.124944	2.75765	0.00582181	0.072935
ENSG00000181929.11	PRKAG1	protein_coding	protein kinase AMP-activated non-catalytic subunit gamma 1 [Source:HGNC Symbol;Acc:HGNC:9385]	1333.8	1317.1	1282.17	1189.29	1198.17	1236.21	1532.87	1614.88	1793.29	1942.5	1887.9	1936.17	61.61	63.7	70.58	78.35	75.01	76.24	1784.59	0.222636	0.0807395	2.75746	0.00582525	0.072935
ENSG00000147416.10	ATP6V1B2	protein_coding	ATPase H+ transporting V1 subunit B2 [Source:HGNC Symbol;Acc:HGNC:854]	2695.09	2728.81	2635.46	2588.04	2497.23	2592.92	1060.59	1117.98	1215.53	1295.17	1349.21	1354.45	20.46	21.16	22.96	25.07	25.74	25.59	1232.14	0.235708	0.0855006	2.7568	0.00583703	0.073013
ENSG00000145012.13	LPP	protein_coding	LIM domain containing preferred translocation partner in lipoma [Source:HGNC Symbol;Acc:HGNC:6679]	7287.4	12943.7	8679.8	8546.36	14697.3	9045.03	2242.31	1414.88	2229.64	1215.94	678.448	1193.75	11.49	7.11	11.16	6.25	3.43	5.98	1495.97	-0.931499	0.33807	-2.75534	0.00586306	0.0732688
ENSG00000205339.9	IPO7	protein_coding	importin 7 [Source:HGNC Symbol;Acc:HGNC:9852]	5360.09	4996.93	5398.24	5581.47	5416.29	5598.07	6205.4	7004.02	6886.11	5829.75	5982.41	5938.54	58.23	64.51	63.28	54.92	55.52	54.6	6307.69	-0.178619	0.0648541	-2.75416	0.00588426	0.0734638
ENSG00000163625.15	WDFY3	protein_coding	WD repeat and FYVE domain containing 3 [Source:HGNC Symbol;Acc:HGNC:20751]	6744.51	5636.68	5555.7	6322.4	6566.39	6549.02	1941.42	2519.5	2443.91	1938.91	1902.96	1913.41	15.81	20.13	19.49	15.84	15.31	15.26	2110.06	-0.261961	0.0951692	-2.75258	0.00591268	0.0736917
ENSG00000196367.12	TRRAP	protein_coding	transformation/transcription domain associated protein [Source:HGNC Symbol;Acc:HGNC:12347]	11889.9	11885.6	11926.1	11915.1	11795.6	12005.2	6722.35	6051.06	6106.39	5693.55	5276.68	5654.9	28.56	25.23	25.4	24.28	22.17	23.53	5917.49	-0.183271	0.0665828	-2.75253	0.00591374	0.0736917
ENSG00000155906.16	RMND1	protein_coding	required for meiotic nuclear division 1 homolog [Source:HGNC Symbol;Acc:HGNC:21176]	1593.52	1551.39	1571.19	1585.8	1584.63	1581.67	1016.88	1117.85	1126.74	904.417	928.621	924.88	32.59	35.16	35.36	29.09	29.42	29.03	1003.23	-0.241785	0.0878606	-2.75192	0.00592468	0.073758
ENSG00000093009.9	CDC45	protein_coding	cell division cycle 45 [Source:HGNC Symbol;Acc:HGNC:1739]	1440.34	1285.1	1378.53	1447.55	1572.57	1314.88	1188.27	1276.83	1248.04	995.704	978.672	1141.08	42.82	45.16	44.03	36.01	34.87	40.29	1138.1	-0.250364	0.0911361	-2.74715	0.00601163	0.0746496
ENSG00000147813.15	NAPRT	protein_coding	nicotinate phosphoribosyltransferase [Source:HGNC Symbol;Acc:HGNC:30450]	1034.94	993.486	1047.7	1032.21	1006.81	1066.81	875.253	802.312	707.434	955.235	1044.91	917.173	42.98	38.65	34	47.07	50.75	44.11	883.728	0.289142	0.105256	2.74705	0.00601334	0.0746496
ENSG00000184584.12	TMEM173	protein_coding	transmembrane protein 173 [Source:HGNC Symbol;Acc:HGNC:27962]	1560.28	1509.94	1433.58	1566.2	1348.44	1593.47	345.185	326.291	299.844	418.629	444.418	385.833	11.63	10.81	9.9	14.17	14.81	12.75	370.023	0.357834	0.130239	2.74752	0.00600474	0.0746496
ENSG00000069869.15	NEDD4	protein_coding	neural precursor cell expressed, developmentally down-regulated 4, E3 ubiquitin protein ligase [Source:HGNC Symbol;Acc:HGNC:7727]	5516.43	5461.54	5304.35	5426	5212.11	5235.53	1093.21	1227.15	1375.26	1419.5	1513.37	1496.26	10.32	11.36	12.71	13.45	14.12	13.84	1354.1	0.260415	0.0948264	2.74623	0.00602843	0.0747662
ENSG00000101844.17	ATG4A	protein_coding	autophagy related 4A cysteine peptidase [Source:HGNC Symbol;Acc:HGNC:16489]	2118.74	2077.19	2124.1	2066.99	2108.77	1992.76	452.303	493.748	523.648	576.495	604.188	636.278	10.99	11.77	12.46	14.06	14.52	15.15	547.782	0.306827	0.111767	2.74522	0.00604694	0.0749163
ENSG00000116251.9	RPL22	protein_coding	ribosomal protein L22 [Source:HGNC Symbol;Acc:HGNC:10315]	868.384	902.385	892.105	881.553	861.865	843.188	9649.11	10297.1	11137.7	8563.14	9417.72	9267.73	557.82	584.26	630.5	496.91	538.34	524.84	9722.07	-0.190287	0.0693304	-2.74464	0.00605765	0.0749163
ENSG00000183778.17	B3GALT5	protein_coding	beta-1,3-galactosyltransferase 5 [Source:HGNC Symbol;Acc:HGNC:920]	9802.56	10068.2	9714.8	9302.08	9976.16	9470.96	967.882	780.892	847.133	818.287	587.296	614.363	5.04	3.98	4.31	4.28	3.02	3.13	769.364	-0.362189	0.131958	-2.74472	0.00605623	0.0749163
ENSG00000161642.17	ZNF385A	protein_coding	zinc finger protein 385A [Source:HGNC Symbol;Acc:HGNC:17521]	1937.02	2121.43	2089.1	2090.99	1944.31	2051.49	402.613	293.845	347.312	429.271	534.513	425.939	9.99	7.16	8.44	10.69	13.12	10.35	405.575	0.406078	0.147986	2.74404	0.00606887	0.0749845
ENSG00000078747.14	ITCH	protein_coding	itchy E3 ubiquitin protein ligase [Source:HGNC Symbol;Acc:HGNC:13890]	3905.9	4063.94	3979.66	3817.64	4108.73	4203.52	1883.36	2006.23	2080.03	1804.98	1743.28	1566.6	23.74	24.81	25.68	22.84	21.73	19.35	1847.4	-0.224781	0.0819655	-2.74239	0.00609937	0.0752905
ENSG00000130202.9	NECTIN2	protein_coding	nectin cell adhesion molecule 2 [Source:HGNC Symbol;Acc:HGNC:9707]	1914.58	1842.78	1768.97	1848.4	1822.15	1899.79	4697.73	4578.7	4781.64	4882.96	5689.35	5508.4	128.49	122.9	128.07	134.05	153.86	147.58	5023.11	0.193358	0.0705177	2.74198	0.00610703	0.0753143
ENSG00000141429.13	GALNT1	protein_coding	polypeptide N-acetylgalactosaminyltransferase 1 [Source:HGNC Symbol;Acc:HGNC:4123]	2901.53	2978.1	2959.54	3143.4	3078.52	3018.79	1577.06	1571.18	1736.37	1341.49	1404.91	1447.47	26.48	25.89	28.54	22.6	23.32	23.8	1513.09	-0.220779	0.0805635	-2.74043	0.00613591	0.0755286
ENSG00000165379.13	LRFN5	protein_coding	leucine rich repeat and fibronectin type III domain containing 5 [Source:HGNC Symbol;Acc:HGNC:20360]	1238.14	3410.9	3451.72	3557.33	3541.2	3540.97	131.2	44.9746	53.5396	39.1131	38.0282	26.4784	2.25	0.76	0.9	0.67	0.65	0.45	55.5214	-1.1045	0.403001	-2.7407	0.00613089	0.0755286
ENSG00000021300.13	PLEKHB1	protein_coding	pleckstrin homology domain containing B1 [Source:HGNC Symbol;Acc:HGNC:19079]	1655.44	1445.93	1562.98	1759.82	1386.57	1621.81	350.276	460.455	347.042	441.013	638.72	485.347	11.31	14.58	10.97	14.28	20.38	15.34	453.801	0.432564	0.157901	2.73946	0.00615403	0.0756396
ENSG00000116120.9	FARSB	protein_coding	phenylalanyl-tRNA synthetase beta subunit [Source:HGNC Symbol;Acc:HGNC:17800]	3190.54	3183.37	3186.72	3187.74	3187.2	3186.97	2139.24	2280.01	2432.43	2003.27	1952.47	1992.2	33.94	35.5	37.79	31.9	30.63	30.96	2133.27	-0.204137	0.0745209	-2.73933	0.00615644	0.0756396
ENSG00000151365.2	THRSP	protein_coding	thyroid hormone responsive [Source:HGNC Symbol;Acc:HGNC:11800]	995.54	988.37	991.72	992.74	992.2	991.97	144.259	150.12	129.751	86.9657	106.294	90.6733	7.35	7.51	6.48	4.45	5.36	4.53	118.012	-0.582943	0.212884	-2.73832	0.00617542	0.0758019
ENSG00000104825.16	NFKBIB	protein_coding	NFKB inhibitor beta [Source:HGNC Symbol;Acc:HGNC:7798]	1623.64	1691.03	1619.77	1627.41	1693.98	1655.98	811.773	694.971	731.212	853.766	906.626	941.746	24.86	20.88	21.92	26.24	27.45	28.24	823.343	0.271611	0.0992147	2.73761	0.00618878	0.0758241
ENSG00000196670.13	ZFP62	protein_coding	ZFP62 zinc finger protein [Source:HGNC Symbol;Acc:HGNC:23241]	1975.79	1941.01	1908.12	2121.9	2016.91	1932.71	1139.65	1253.8	1149.59	1034.37	994.16	980.588	29.08	31.4	28.73	26.49	25.09	24.52	1092.03	-0.23461	0.085695	-2.73774	0.00618635	0.0758241
ENSG00000047249.17	ATP6V1H	protein_coding	ATPase H+ transporting V1 subunit H [Source:HGNC Symbol;Acc:HGNC:18303]	1456.91	1606.67	1541.32	1549.55	1610.21	1457.35	1561.21	1559.5	1559.04	1750.5	1791.64	1812.66	51.4	50.39	50.26	57.86	58.33	58.47	1672.43	0.194604	0.0710953	2.73723	0.0061959	0.0758405
ENSG00000165244.6	ZNF367	protein_coding	zinc finger protein 367 [Source:HGNC Symbol;Acc:HGNC:18320]	3467.54	3460.37	3463.72	3464.74	3464.2	3463.97	912.892	967.494	1033.61	804.542	820.82	823.342	13.33	13.86	14.77	11.79	11.85	11.77	893.784	-0.251487	0.0919213	-2.73589	0.00622119	0.0760792
ENSG00000166971.16	AKTIP	protein_coding	AKT interacting protein [Source:HGNC Symbol;Acc:HGNC:16710]	1620.67	1707.57	1715.83	1488.42	1519.84	1563.04	787.02	761.284	754.28	984.091	905.333	865.466	24.87	23.63	23.34	31.21	28.29	26.79	842.908	0.257412	0.0941691	2.73351	0.00626636	0.0765604
ENSG00000183401.11	CCDC159	protein_coding	coiled-coil domain containing 159 [Source:HGNC Symbol;Acc:HGNC:26996]	545.366	509.547	502.091	537.599	560.445	584.006	210.178	231.357	172.974	297.356	304.19	245.046	19.69	21.29	15.91	28.03	28.2	22.53	243.521	0.461576	0.168878	2.73319	0.00627248	0.0765639
ENSG00000204396.10	VWA7	protein_coding	von Willebrand factor A domain containing 7 [Source:HGNC Symbol;Acc:HGNC:13939]	1497.83	1871.63	1534.13	1730.92	1905.36	1506.68	130.812	111.937	107.648	163.367	162.357	179.711	3.97	3.33	3.2	4.98	4.87	5.33	142.631	0.530254	0.194215	2.73024	0.00632876	0.0771791
ENSG00000100292.16	HMOX1	protein_coding	heme oxygenase 1 [Source:HGNC Symbol;Acc:HGNC:5013]	1643.54	1636.37	1599.84	1550.43	1601.84	1627.61	238.358	296.455	284.268	289.998	400.251	428.919	7.49	9.14	8.74	9.15	12.43	13.2	323.041	0.454004	0.166442	2.7277	0.00637767	0.0776634
ENSG00000157600.11	TMEM164	protein_coding	transmembrane protein 164 [Source:HGNC Symbol;Acc:HGNC:26217]	4992.91	4968.26	4978.78	4917.92	5001.18	4996.88	7356.75	8343.83	8311.91	6275.39	7306.11	7191.65	74.76	83.22	82.72	64.02	73.42	71.59	7464.29	-0.209085	0.076656	-2.72757	0.00638029	0.0776634
ENSG00000283041.1	AC008038.1	processed_pseudogene		1135.54	1128.37	1131.72	1132.74	1132.2	1131.97	2844.92	3097.62	3102.32	2582.34	2682.96	2685.03	127.07	135.78	135.7	115.81	118.52	117.5	2832.54	-0.185967	0.0682175	-2.72608	0.00640914	0.0779422
ENSG00000113532.12	ST8SIA4	protein_coding	ST8 alpha-N-acetyl-neuraminide alpha-2,8-sialyltransferase 4 [Source:HGNC Symbol;Acc:HGNC:10871]	5214.83	4129.97	5824.51	5142.64	4219.94	4538.22	108.444	205.769	132.983	165.736	314.304	237.105	1.14	2.12	1.37	1.75	3.27	2.44	194.03	0.686866	0.252145	2.72409	0.00644788	0.0782684
ENSG00000158301.18	GPRASP2	protein_coding	G protein-coupled receptor associated sorting protein 2 [Source:HGNC Symbol;Acc:HGNC:25169]	3391.32	3574.18	3266.56	3569.13	2876.38	2840.83	404.411	388.117	387.469	428.996	537.934	539.205	6.31	5.94	5.93	6.72	8.3	8.25	447.671	0.348433	0.127896	2.72434	0.00644302	0.0782684
ENSG00000141367.11	CLTC	protein_coding	clathrin heavy chain [Source:HGNC Symbol;Acc:HGNC:2092]	6130.17	6277.97	6140.79	6102.44	6059.23	6138.46	69518.9	73803.8	77905.9	79947.1	84498.2	82879.7	572.44	596.45	628.14	660.8	687.97	668.51	78092	0.16073	0.0590138	2.72359	0.00645759	0.078314
ENSG00000162105.17	SHANK2	protein_coding	SH3 and multiple ankyrin repeat domains 2 [Source:HGNC Symbol;Acc:HGNC:14295]	6249.39	5510.4	4638.04	3745.76	5546.23	4585.21	423.753	528.13	560.372	461.161	309.184	352.029	4.3	5.26	5.57	4.71	3.11	3.51	439.062	-0.430589	0.158207	-2.72168	0.00649506	0.0786957
ENSG00000111674.8	ENO2	protein_coding	enolase 2 [Source:HGNC Symbol;Acc:HGNC:3353]	2091.14	2012.34	2092.97	2031.17	2063.7	2082.93	969.829	847.565	752.922	1143.1	1048.82	973.589	23.78	20.4	18.08	28.14	25.42	23.39	955.965	0.299643	0.110129	2.72083	0.00651188	0.0788268
ENSG00000176058.11	TPRN	protein_coding	taperin [Source:HGNC Symbol;Acc:HGNC:26894]	2160.31	2136.05	2107.65	2119.32	2118.62	2118.91	1076.85	1017.52	1014.52	1160.06	1198.17	1296.92	25.6	23.74	23.62	27.68	28.17	30.21	1127.33	0.234731	0.0863219	2.71925	0.00654298	0.0791303
ENSG00000138688.15	KIAA1109	protein_coding	KIAA1109 [Source:HGNC Symbol;Acc:HGNC:26953]	6517.78	6443.7	6437.32	6064.15	6129.13	5924.45	3450.55	3382.98	3503.65	4080.62	3641.06	4008.51	27.92	26.86	27.76	33.15	29.13	31.77	3677.91	0.183184	0.0673923	2.71818	0.00656422	0.0793141
ENSG00000167632.14	TRAPPC9	protein_coding	trafficking protein particle complex 9 [Source:HGNC Symbol;Acc:HGNC:30832]	3761.63	3947.25	3777.03	3781.57	3754.1	3665.29	1001.97	762.802	883.06	758.227	624.662	731.197	13.41	10.01	11.57	10.18	8.26	9.58	793.673	-0.323839	0.119193	-2.71693	0.00658909	0.0795415
ENSG00000100297.15	MCM5	protein_coding	minichromosome maintenance complex component 5 [Source:HGNC Symbol;Acc:HGNC:6948]	2452.37	2445.17	2208.54	2741.84	2328.95	2664.67	2584.66	2232.37	2604.02	1794.01	2299.05	2102.07	52.98	44.91	52.28	36.92	46.61	42.21	2269.37	-0.262763	0.0967804	-2.71505	0.00662664	0.0799213
ENSG00000149923.13	PPP4C	protein_coding	protein phosphatase 4 catalytic subunit [Source:HGNC Symbol;Acc:HGNC:9319]	1100.87	1077.9	1082.8	1100.08	1098.08	1092.75	4000.15	3487.26	3514.39	4205.24	4113.79	4263.29	185.22	158.48	159.35	195.46	188.35	193.38	3930.68	0.193538	0.0713476	2.71261	0.00667566	0.0803842
ENSG00000181885.18	CLDN7	protein_coding	claudin 7 [Source:HGNC Symbol;Acc:HGNC:2049]	1252.4	1251.24	1291.15	1235.63	1253.62	1270.36	3329.63	2970.81	3023.15	2628.2	2771.65	2758.57	133.74	117.11	118.9	105.97	110.08	108.53	2913.67	-0.193052	0.0711704	-2.71253	0.00667727	0.0803842
ENSG00000113734.17	BNIP1	protein_coding	BCL2 interacting protein 1 [Source:HGNC Symbol;Acc:HGNC:1082]	1019.56	1014.67	1013.39	1014.83	1014.7	1019.77	471.605	453.863	462.241	388.348	371.93	352.409	23.47	22.17	22.52	19.4	18.3	17.18	416.734	-0.321	0.118484	-2.70924	0.00674385	0.0810742
ENSG00000141232.4	TOB1	protein_coding	transducer of ERBB2, 1 [Source:HGNC Symbol;Acc:HGNC:11979]	1892.97	1987.69	1967.57	1941	1881.1	1892.24	6000.32	6109.4	5986.32	6363.34	7111.73	6870.17	157.49	157.37	153.85	167.65	184.57	176.63	6406.87	0.168728	0.0622821	2.70908	0.00674692	0.0810742
ENSG00000087253.12	LPCAT2	protein_coding	lysophosphatidylcholine acyltransferase 2 [Source:HGNC Symbol;Acc:HGNC:26032]	3496.14	3646.07	3356.04	4057.44	4251.18	3589.39	510.177	476.221	598.834	446.168	348.512	431.677	6.94	6.35	7.97	6.09	4.69	5.75	468.571	-0.368287	0.136012	-2.70775	0.00677403	0.0813255
ENSG00000196247.11	ZNF107	protein_coding	zinc finger protein 107 [Source:HGNC Symbol;Acc:HGNC:12887]	4735.91	4660.83	4824.46	4747.85	4699.1	4483.2	918.516	1135.7	994.396	896.9	834.151	765.703	9.9	12.02	10.49	9.71	8.89	8.08	924.247	-0.287745	0.106303	-2.70683	0.00679288	0.0814773
ENSG00000169251.12	NMD3	protein_coding	NMD3 ribosome export adaptor [Source:HGNC Symbol;Acc:HGNC:24250]	2145.24	2169.46	2175.75	2194.81	2121.89	2165.69	6785.83	7661.07	7788.9	8406.1	8766.79	8127.86	158.71	175.85	178.39	197.35	202.75	186.21	7922.74	0.185885	0.0687096	2.70537	0.00682274	0.0817608
ENSG00000143228.12	NUF2	protein_coding	NUF2, NDC80 kinetochore complex component [Source:HGNC Symbol;Acc:HGNC:14621]	1618.2	1611.09	1583.43	1598.45	1627.39	1546.9	918.994	925.639	910.907	836.347	748.902	720.28	29.1	28.76	28.23	26.57	23.44	22.33	843.516	-0.258137	0.0954962	-2.70311	0.00686941	0.082245
ENSG00000111602.11	TIMELESS	protein_coding	timeless circadian clock [Source:HGNC Symbol;Acc:HGNC:11813]	4045.78	4081.05	4046.66	4116.77	4046.66	4040.95	5029.89	4845.74	4881.3	4538.05	4365.23	4308.09	62.61	59.2	59.49	56.7	53.72	52.52	4661.41	-0.160062	0.0592303	-2.70237	0.00688476	0.0823537
ENSG00000100280.16	AP1B1	protein_coding	adaptor related protein complex 1 beta 1 subunit [Source:HGNC Symbol;Acc:HGNC:554]	3822.22	3834.14	3840.9	3806.63	3803.24	3768.76	5515.9	5171.25	5142.49	5552.33	6118.84	6330.1	73.16	67.32	66.79	73.93	80.24	82.24	5638.47	0.18551	0.0686571	2.70197	0.00689292	0.0823763
ENSG00000117984.13	CTSD	protein_coding	cathepsin D [Source:HGNC Symbol;Acc:HGNC:2529]	1530.45	1529.1	1532.3	1520.34	1514.54	1503.98	44691.7	47077	43206.4	45980	58364.4	52222.1	1485.1	1535.34	1405.83	1533.7	1917.7	1699.88	48590.5	0.213929	0.0791984	2.70118	0.00690936	0.082474
ENSG00000143811.18	PYCR2	protein_coding	pyrroline-5-carboxylate reductase 2 [Source:HGNC Symbol;Acc:HGNC:30262]	1493.7	1471.25	1533.77	1478.9	1430.41	1465.33	1991.79	1826.38	1709.87	2052.63	2175.45	2189.79	68.11	61.31	57.25	70.47	73.56	73.37	1990.98	0.215524	0.0798039	2.70067	0.00691993	0.082474
ENSG00000243708.10	PLA2G4B	protein_coding	phospholipase A2 group IVB [Source:HGNC Symbol;Acc:HGNC:9036]	2528.76	2221.45	2258.8	2149.23	918.7	1555.16	86.2985	77.9442	74.0756	113.209	167.209	106.373	2.37	2.11	1.99	3.13	4.55	2.85	104.193	0.657633	0.243484	2.70093	0.00691451	0.082474
ENSG00000135525.18	MAP7	protein_coding	microtubule associated protein 7 [Source:HGNC Symbol;Acc:HGNC:6869]	3433.95	3631.3	3561.55	3456.47	3401.91	3436.07	1478.7	1413.94	1529.86	1320.8	1231.35	1260.35	21.45	20.13	21.73	19.23	17.66	17.92	1372.5	-0.214382	0.0793963	-2.70016	0.00693071	0.0825043
ENSG00000137486.16	ARRB1	protein_coding	arrestin beta 1 [Source:HGNC Symbol;Acc:HGNC:711]	2173.02	2213.96	2184.49	2268.5	2193.6	2176.53	1100.82	1008.31	1157.24	1133.3	1347.76	1534.95	25.29	22.73	26.03	26.12	30.61	34.54	1213.72	0.298016	0.110391	2.69965	0.00694131	0.0825043
ENSG00000181392.14	SYNE4	protein_coding	spectrin repeat containing nuclear envelope family member 4 [Source:HGNC Symbol;Acc:HGNC:26703]	886.589	917.962	849.183	895.067	916.889	939.791	634.957	537.913	621.967	728.469	713.621	744.24	35.66	29.64	34.21	41.06	39.63	40.95	663.528	0.283425	0.104979	2.69982	0.00693762	0.0825043
ENSG00000124226.10	RNF114	protein_coding	ring finger protein 114 [Source:HGNC Symbol;Acc:HGNC:13094]	1827.29	2003.19	1970.9	1843.85	1858	1796.24	10049.3	9468.06	9524.21	10463.1	10811.3	10988.2	270.06	249.71	250.61	282.24	287.28	289.25	10217.4	0.151724	0.0562116	2.69916	0.00695143	0.0825498
ENSG00000136937.12	NCBP1	protein_coding	nuclear cap binding protein subunit 1 [Source:HGNC Symbol;Acc:HGNC:7658]	4722.39	4505.54	4558.22	4604.88	4812.38	4739.15	2889.19	3156.48	3252.95	2890.49	2552.98	2608.66	31.38	33.65	34.6	31.51	27.41	27.76	2891.81	-0.207644	0.0769614	-2.69803	0.00697517	0.0827569
ENSG00000204103.3	MAFB	protein_coding	MAF bZIP transcription factor B [Source:HGNC Symbol;Acc:HGNC:6408]	3214.54	3207.37	3210.72	3211.74	3211.2	3210.97	498.888	443.52	479.214	417.84	336.401	365.114	7.86	6.85	7.39	6.6	5.24	5.63	423.497	-0.344289	0.127681	-2.69648	0.00700757	0.0830663
ENSG00000105229.6	PIAS4	protein_coding	protein inhibitor of activated STAT 4 [Source:HGNC Symbol;Acc:HGNC:17002]	1951.18	1594.74	1727.51	1576.74	1511.17	1750.05	680.508	700.278	673.723	835.217	889.66	757.826	20.5	20.7	19.87	25.25	26.5	22.36	756.203	0.269304	0.0998857	2.69612	0.00701518	0.0830815
ENSG00000130766.4	SESN2	protein_coding	sestrin 2 [Source:HGNC Symbol;Acc:HGNC:20746]	3274.54	3267.37	3270.72	3271.74	3271.2	3270.97	618.199	586.432	600.669	634.818	831.584	777.603	9.56	8.9	9.09	9.85	12.71	11.78	674.881	0.31203	0.115756	2.69558	0.00702656	0.0831413
ENSG00000198736.11	MSRB1	protein_coding	methionine sulfoxide reductase B1 [Source:HGNC Symbol;Acc:HGNC:14133]	1225.39	1206.16	1229.94	1227.65	1227.81	1228	1428.04	1329.27	1428.22	1498.71	1667.63	1731.82	58.98	53.88	57.77	62.15	68.12	70.08	1513.95	0.22654	0.0840536	2.69519	0.00703484	0.0831644
ENSG00000165480.15	SKA3	protein_coding	spindle and kinetochore associated complex subunit 3 [Source:HGNC Symbol;Acc:HGNC:20262]	2137.17	2337.08	2284.75	2128.27	2223.99	2232.56	1050.12	938.561	1117.96	868.457	910.488	813.995	23.89	20.96	24.9	19.83	20.48	18.14	949.929	-0.264874	0.0983129	-2.69419	0.007056	0.0833395
ENSG00000228716.6	DHFR	protein_coding	dihydrofolate reductase [Source:HGNC Symbol;Acc:HGNC:2861]	2293.38	2271.74	2272.45	2131.37	2405.4	2366.32	3652.76	3988.99	4065.75	3720.15	3206.96	3169.09	80.71	86.52	87.97	82.5	70.05	68.6	3633.97	-0.214252	0.0795344	-2.69383	0.00706365	0.0833549
ENSG00000084693.15	AGBL5	protein_coding	ATP/GTP binding protein like 5 [Source:HGNC Symbol;Acc:HGNC:26147]	2073.02	2062.44	2005.7	2098.91	2164.01	2146	1020.29	1014.3	1018.03	906.553	806.158	870.66	24.68	24.07	24.11	22.01	19.27	20.62	939.348	-0.239763	0.0890224	-2.69328	0.00707521	0.0834163
ENSG00000160410.14	SHKBP1	protein_coding	SH3KBP1 binding protein 1 [Source:HGNC Symbol;Acc:HGNC:19214]	1442.61	1303.66	1383.86	1364.73	1393.34	1295.42	2020.76	1903.57	1841.33	2193.15	2128.49	2288.51	74.98	69.31	66.88	81.68	78.08	83.18	2062.64	0.197957	0.073519	2.69259	0.00708983	0.083439
ENSG00000198561.13	CTNND1	protein_coding	catenin delta 1 [Source:HGNC Symbol;Acc:HGNC:2515]	5125.66	5245.71	5260.24	5235.59	5151.72	5108.7	5136.07	5167.52	5285.12	5679.13	5742.55	5903.6	50.07	49.44	50.44	55.56	55.36	56.37	5485.65	0.152414	0.056602	2.69273	0.00708694	0.083439
ENSG00000107968.9	MAP3K8	protein_coding	mitogen-activated protein kinase kinase kinase 8 [Source:HGNC Symbol;Acc:HGNC:6860]	1496.08	1242.23	1405.37	1446.46	1505.17	1319.09	246.218	307.539	253.317	332.54	352.734	363.858	8.9	10.91	8.96	12.07	12.6	12.89	309.372	0.386111	0.143435	2.69189	0.00710484	0.0835394
ENSG00000135913.10	USP37	protein_coding	ubiquitin specific peptidase 37 [Source:HGNC Symbol;Acc:HGNC:20063]	6151.28	7168.91	6617.02	6843.26	7368.34	6846.68	1183.89	1001.52	1171.85	918.836	951.747	948.018	8.78	7.29	8.5	6.84	6.97	6.89	1029.29	-0.253003	0.0940159	-2.69106	0.00712243	0.0835394
ENSG00000138095.18	LRPPRC	protein_coding	leucine rich pentatricopeptide repeat containing [Source:HGNC Symbol;Acc:HGNC:15714]	5174.65	4881.7	4891.76	5120.69	4896.4	5023.15	8457.7	9609.25	9940.66	7938.05	8522.17	8076.04	85.59	95.43	98.51	80.63	85.28	80.06	8757.33	-0.191181	0.0710462	-2.69095	0.00712499	0.0835394
ENSG00000168646.12	AXIN2	protein_coding	axin 2 [Source:HGNC Symbol;Acc:HGNC:904]	3383.47	3489.51	2318.29	2676.46	3995	3591.85	52.8658	57.979	73.8605	37.1193	28.9997	31.9047	0.84	0.9	1.15	0.6	0.45	0.5	47.0818	-0.905046	0.336358	-2.69073	0.00712969	0.0835394
ENSG00000204388.6	HSPA1B	protein_coding	heat shock protein family A (Hsp70) member 1B [Source:HGNC Symbol;Acc:HGNC:5233]	2342.54	2335.37	2338.72	2339.74	2339.2	2338.97	9428.1	8834.51	9200.48	9826.55	10176.7	10665.2	203.83	187.45	194.76	213.23	217.53	225.85	9688.56	0.159225	0.0591759	2.6907	0.00713017	0.0835394
ENSG00000137822.12	TUBGCP4	protein_coding	tubulin gamma complex associated protein 4 [Source:HGNC Symbol;Acc:HGNC:16691]	4281.93	4747.19	4393.1	4745.46	4080.18	4422.06	1381.44	1174.81	1339.66	1018.93	1178.39	1073.96	15.74	13.13	14.95	11.67	13.28	11.98	1194.51	-0.255183	0.094867	-2.68991	0.00714722	0.0836645
ENSG00000081059.19	TCF7	protein_coding	transcription factor 7 [Source:HGNC Symbol;Acc:HGNC:11639]	1709.51	2564.1	2490.34	2665.43	1915.02	2125.24	80.9239	72.4601	65.4262	18.7572	49.8284	44.2864	1.84	1.62	1.46	0.43	1.12	1	55.2786	-0.971484	0.36127	-2.68908	0.00716495	0.0836991
ENSG00000107485.15	GATA3	protein_coding	GATA binding protein 3 [Source:HGNC Symbol;Acc:HGNC:4172]	2715.74	2730.27	2737.95	2719.09	2700.87	2699.96	29958.9	26612.8	27214.1	30896.2	31453.4	31337.8	557.51	486.06	495.89	577.14	578.78	571.27	29578.8	0.161003	0.0598773	2.68888	0.00716929	0.0836991
ENSG00000111490.12	TBC1D30	protein_coding	TBC1 domain family member 30 [Source:HGNC Symbol;Acc:HGNC:29164]	2276.81	2192.53	2205.94	2160.53	2087.77	2073.16	1385.12	1470.07	1499.98	1555.66	1727.54	1806.57	32.34	33.7	34.3	36.48	39.9	41.33	1574.16	0.225641	0.0839117	2.68903	0.00716595	0.0836991
ENSG00000019582.14	CD74	protein_coding	CD74 molecule [Source:HGNC Symbol;Acc:HGNC:1697]	1181.21	1145.39	1216.25	1137.52	1149.68	1136.94	213.392	169.943	112.753	325.617	209.237	227.663	9.3	7.27	4.81	14.24	9.01	9.72	209.766	0.623806	0.232076	2.68793	0.00718955	0.0838611
ENSG00000109066.13	TMEM104	protein_coding	transmembrane protein 104 [Source:HGNC Symbol;Acc:HGNC:25984]	3322.3	3287.22	3395.67	2908.27	3070.04	3288.38	781.76	719.687	692.943	894.581	868.832	857.224	12.33	11.14	10.7	14.16	13.54	13.24	802.501	0.255484	0.0951116	2.68615	0.007228	0.0842348
ENSG00000079393.20	DUSP13	protein_coding	dual specificity phosphatase 13 [Source:HGNC Symbol;Acc:HGNC:19681]	878.265	899.317	1041.86	1051.76	1161.83	971.207	36.9397	30.1174	19.7456	44.7682	58.8365	68.6899	1.88	1.5	0.98	2.28	2.95	3.41	43.1722	1.00426	0.374083	2.68458	0.00726203	0.0845563
ENSG00000122026.10	RPL21	protein_coding	ribosomal protein L21 [Source:HGNC Symbol;Acc:HGNC:10313]	473.945	465.178	471.186	472.824	470.359	479.064	17572.1	19716.9	20333.1	17181.7	17108.9	16810.4	1882.24	2072.84	2132.7	1847.46	1812.16	1763.86	18120.5	-0.173391	0.0646545	-2.68181	0.00732249	0.0850929
ENSG00000151835.14	SACS	protein_coding	sacsin molecular chaperone [Source:HGNC Symbol;Acc:HGNC:10519]	7467.48	10263.6	10674.3	9959.63	9910.19	10269.4	961.804	661.255	840.19	615.839	658.062	666.074	5.02	3.38	4.29	3.23	3.39	3.41	733.908	-0.343263	0.128024	-2.68123	0.00733521	0.0850929
ENSG00000167608.11	TMC4	protein_coding	transmembrane channel like 4 [Source:HGNC Symbol;Acc:HGNC:22998]	1275.35	1391.74	1403.43	1368.64	1642.64	1435.72	1474.03	1299.76	1287.27	1741.04	1423.86	1690.16	52.66	45.57	45.04	62.44	50.29	59.15	1486.02	0.25853	0.0964169	2.68137	0.0073321	0.0850929
ENSG00000177932.6	ZNF354C	protein_coding	zinc finger protein 354C [Source:HGNC Symbol;Acc:HGNC:16736]	5232.54	5225.37	5228.72	5229.74	5229.2	5228.97	166.365	172.34	171.848	126.758	115.723	117.619	1.61	1.63	1.62	1.23	1.11	1.11	145.11	-0.503015	0.187616	-2.68109	0.00733825	0.0850929
ENSG00000180628.14	PCGF5	protein_coding	polycomb group ring finger 5 [Source:HGNC Symbol;Acc:HGNC:28264]	2041.83	2328.14	2230.83	1965.56	2024.83	1939.03	1284.29	1299.98	1259.31	1554.61	1462.29	1428.89	31.16	30.98	29.92	37.87	35.08	33.97	1381.56	0.209714	0.0782228	2.68099	0.00734051	0.0850929
ENSG00000162458.12	FBLIM1	protein_coding	filamin binding LIM protein 1 [Source:HGNC Symbol;Acc:HGNC:24686]	2132.42	2140.37	2495.75	2603.52	3215.28	2343.11	343.856	362.503	233.205	217.532	189.694	252.454	7.06	7.3	4.69	4.49	3.85	5.08	266.533	-0.501356	0.187069	-2.68006	0.00736094	0.0852545
ENSG00000101745.16	ANKRD12	protein_coding	ankyrin repeat domain 12 [Source:HGNC Symbol;Acc:HGNC:29135]	6589.57	7355.69	7170.94	7835.59	8207.9	7343.68	1272.01	1308.47	1282.14	1051.11	1106.39	1155.5	8.68	8.77	8.58	7.21	7.48	7.74	1195.91	-0.219379	0.0818781	-2.67934	0.00737685	0.0853635
ENSG00000204323.5	SMIM5	protein_coding	small integral membrane protein 5 [Source:HGNC Symbol;Acc:HGNC:40030]	1770.54	1838.51	1721.17	1578.7	1752.63	1646.91	82.4254	109.979	79.0693	114.441	146.243	154.036	2.43	3.17	2.28	3.4	4.25	4.45	114.383	0.622669	0.232446	2.67876	0.00738952	0.0854348
ENSG00000108774.14	RAB5C	protein_coding	RAB5C, member RAS oncogene family [Source:HGNC Symbol;Acc:HGNC:9785]	1355.72	1338.82	1311.67	1347.75	1290.33	1293.48	3813.36	3682.75	3761.4	4000.37	4296.88	4379.99	145.78	138.18	140.8	153.51	162.45	164.03	3989.11	0.171176	0.0639423	2.67704	0.00742758	0.0857993
ENSG00000092531.9	SNAP23	protein_coding	synaptosome associated protein 23 [Source:HGNC Symbol;Acc:HGNC:11131]	2046.31	2317.71	2124.1	1987.09	2150.08	2009.12	959.517	1012.57	1032.99	1151.74	1145.01	1214.81	23.07	23.88	24.33	27.79	27.23	28.62	1086.11	0.225567	0.0843282	2.67487	0.00747586	0.0862054
ENSG00000168404.12	MLKL	protein_coding	mixed lineage kinase domain like pseudokinase [Source:HGNC Symbol;Acc:HGNC:26617]	2160.69	2167.74	2180.47	2150.01	2111.48	2078.89	847.302	726.336	747.187	910.555	926.579	939.713	20.01	16.84	17.28	21.58	21.64	21.74	849.602	0.257904	0.0964169	2.67489	0.00747546	0.0862054
ENSG00000005486.16	RHBDD2	protein_coding	rhomboid domain containing 2 [Source:HGNC Symbol;Acc:HGNC:23082]	1555.7	1536.94	1526.12	1577.83	1501.08	1545.56	1765.68	1701.01	1686.03	1851.2	2035.39	2036.7	57.96	54.81	54.19	61	66.07	65.49	1846	0.20081	0.0751484	2.67217	0.00753616	0.086791
ENSG00000033327.12	GAB2	protein_coding	GRB2 associated binding protein 2 [Source:HGNC Symbol;Acc:HGNC:14458]	5355.63	5472.41	5662.89	5910.74	5133.87	5498.66	945.009	889.406	860.208	695.842	811.691	742.689	8.69	8.03	7.74	6.42	7.38	6.69	824.132	-0.262734	0.0983285	-2.67201	0.00753991	0.086791
ENSG00000161057.11	PSMC2	protein_coding	proteasome 26S subunit, ATPase 2 [Source:HGNC Symbol;Acc:HGNC:9548]	977.924	1014.31	992.636	959.891	979.353	953.776	5348.14	5377.32	5755.81	6225.53	5936.2	6303.27	276.12	272.47	290.98	322.63	303.05	318.79	5824.37	0.164078	0.0614129	2.67172	0.00754647	0.086791
ENSG00000123600.19	METTL8	protein_coding	methyltransferase like 8 [Source:HGNC Symbol;Acc:HGNC:25856]	1265.98	1551.22	1535.71	1533.9	1516.21	1486.85	525.007	507.414	481.859	419.289	397.486	406.799	17.94	17.04	16.16	14.4	13.46	13.65	456.281	-0.304363	0.114085	-2.66787	0.00763344	0.0876378
ENSG00000129810.14	SGO1	protein_coding	shugoshin 1 [Source:HGNC Symbol;Acc:HGNC:25088]	1946.67	1966.76	1926.56	1981.46	2068.09	2083.58	967.84	1050.25	1034.1	935.499	847.504	743.602	24.55	26.12	25.68	23.81	21.25	18.48	929.803	-0.275108	0.103119	-2.66788	0.00763322	0.0876378
ENSG00000075618.17	FSCN1	protein_coding	fascin actin-bundling protein 1 [Source:HGNC Symbol;Acc:HGNC:11148]	2584.4	2591.37	2539.35	2595.74	2528.37	2594.97	404.319	308.15	353.142	259.767	264.214	287.414	7.95	5.95	6.8	5.13	5.14	5.53	312.835	-0.393286	0.147522	-2.66595	0.0076771	0.0880503
ENSG00000107566.13	ERLIN1	protein_coding	ER lipid raft associated 1 [Source:HGNC Symbol;Acc:HGNC:16947]	2605.67	2595.25	2661.08	2577.29	2726.46	2736.71	1701.13	1789.51	1804.77	1591.63	1447.68	1553.14	32.46	33.51	33.72	30.49	27.32	29.04	1647.97	-0.20415	0.0765838	-2.6657	0.00768278	0.0880503
ENSG00000101019.21	UQCC1	protein_coding	ubiquinol-cytochrome c reductase complex assembly factor 1 [Source:HGNC Symbol;Acc:HGNC:15891]	2018.59	1984.2	1972.8	1881.24	1936.06	1930.85	729.342	708.314	677.336	886.902	839.085	800.729	18.88	18	17.17	23.04	21.48	20.3	773.612	0.255469	0.0958509	2.66527	0.00769256	0.0880855
ENSG00000128285.4	MCHR1	protein_coding	melanin concentrating hormone receptor 1 [Source:HGNC Symbol;Acc:HGNC:4479]	2112.11	2438.77	2498.84	2411.88	1769.32	2142.86	178.28	175.868	154.428	112.416	117.857	124.883	4.07	3.94	3.45	2.58	2.66	2.79	143.955	-0.513764	0.192844	-2.66414	0.00771851	0.0883057
ENSG00000119139.17	TJP2	protein_coding	tight junction protein 2 [Source:HGNC Symbol;Acc:HGNC:11828]	4273.42	4271.79	4369.25	4295.63	4280.1	4241.48	2314.32	2262.33	2324.72	2604.17	2517.22	2676.49	27.29	26.18	26.84	30.82	29.35	30.92	2449.86	0.176599	0.0663223	2.66273	0.00775088	0.0884449
ENSG00000143061.17	IGSF3	protein_coding	immunoglobulin superfamily member 3 [Source:HGNC Symbol;Acc:HGNC:5950]	7082.45	7075.54	7075.57	7078.32	7081.02	7080.75	4319.87	4544.41	4593.02	4790.98	5040.67	5380.39	30.86	31.86	32.13	34.35	35.6	37.65	4778.21	0.177288	0.0665685	2.66324	0.0077393	0.0884449
ENSG00000158623.14	COPG2	protein_coding	coatomer protein complex subunit gamma 2 [Source:HGNC Symbol;Acc:HGNC:2237]	2955.36	2948.37	2941.87	2952.74	2951.76	2943.37	2025.83	2085.11	2192.84	1825.11	1861.93	1845.3	34.74	35.09	36.82	31.41	31.57	30.99	1972.69	-0.188926	0.0709498	-2.66281	0.00774914	0.0884449
ENSG00000119684.15	MLH3	protein_coding	mutL homolog 3 [Source:HGNC Symbol;Acc:HGNC:7128]	2806.33	2573.16	2474.49	3039	2472.46	2905.96	1078.91	1280.71	1314.02	953.72	1137.25	932.253	20.19	23.52	24.06	17.91	21.04	17.09	1116.13	-0.28494	0.107034	-2.66214	0.00776446	0.088523
ENSG00000213648.10	SULT1A4	protein_coding	sulfotransferase family 1A member 4 [Source:HGNC Symbol;Acc:HGNC:30004]	1163.88	1172.25	1155.56	1172.91	1150.04	1175.13	540.622	419.969	383.934	478.034	696.528	622.65	23.48	17.9	16.32	20.84	29.89	26.46	523.627	0.416953	0.156645	2.66177	0.007773	0.0885435
ENSG00000011114.14	BTBD7	protein_coding	BTB domain containing 7 [Source:HGNC Symbol;Acc:HGNC:18269]	5527.26	5677.01	5568.06	5346.84	4800.99	5372.82	1959.15	2047.61	2080.41	2259.12	2369.51	2288.46	18.43	18.9	19.17	21.34	22.04	21.09	2167.36	0.183348	0.0689681	2.65845	0.00785008	0.089344
ENSG00000010278.12	CD9	protein_coding	CD9 molecule [Source:HGNC Symbol;Acc:HGNC:1709]	945.209	952.263	931.666	941.874	942.477	938.081	4673.86	4543.26	4430.83	5390.23	5009.52	4937.07	250.92	239.38	232.92	290.47	265.93	259.64	4830.79	0.168168	0.0632952	2.65688	0.00788666	0.0894332
ENSG00000107798.17	LIPA	protein_coding	lipase A, lysosomal acid type [Source:HGNC Symbol;Acc:HGNC:6617]	2521	2559.85	2568.28	2552.96	2211.25	2533.92	1906.22	2165.91	2156.68	2354.57	2820.49	2242.96	38.74	43.21	42.92	48.04	56.69	44.66	2274.47	0.249579	0.0939185	2.6574	0.00787463	0.0894332
ENSG00000136490.8	LIMD2	protein_coding	LIM domain containing 2 [Source:HGNC Symbol;Acc:HGNC:28142]	1213.1	1178.31	993.852	1281.68	1186	1216.89	311.901	218.002	226.543	185.122	186.599	172.676	13.43	9.24	9.57	7.99	7.96	7.29	216.812	-0.481245	0.181147	-2.65666	0.00789197	0.0894332
ENSG00000159167.11	STC1	protein_coding	stanniocalcin 1 [Source:HGNC Symbol;Acc:HGNC:11373]	3574.94	3583.32	3652.47	3639.03	3678.2	3629.51	4783.92	4896.79	4990.69	4402.01	4376.37	4417.85	66.71	67.02	68.15	61.62	60.34	60.35	4644.61	-0.152953	0.0575648	-2.65705	0.00788266	0.0894332
ENSG00000168000.14	BSCL2	protein_coding	BSCL2, seipin lipid droplet biogenesis associated [Source:HGNC Symbol;Acc:HGNC:15832]	810.2	924.085	811.745	783.648	842.362	912.799	1631.24	1328.48	1628.69	1826.39	1895.73	1729.43	97.49	77.99	95.33	109.59	112.07	101.3	1673.31	0.246479	0.0927679	2.65694	0.0078854	0.0894332
ENSG00000230453.9	ANKRD18B	protein_coding	ankyrin repeat domain 18B [Source:HGNC Symbol;Acc:HGNC:23644]	1675.51	1603.56	1469.72	1769.36	1643.63	1845.88	219.191	248.015	281.47	190.916	197.49	159.002	6.67	7.4	8.38	5.83	5.94	4.74	216.02	-0.459579	0.17311	-2.65484	0.00793461	0.089839
ENSG00000100796.17	PPP4R3A	protein_coding	protein phosphatase 4 regulatory subunit 3A [Source:HGNC Symbol;Acc:HGNC:20219]	2246.59	2373.94	2379.28	2058.47	2333.75	2084.04	4036.19	4168	4370.55	4931.23	4478.3	4788.2	91.03	92.25	96.52	111.65	99.86	105.78	4462.08	0.175127	0.0660328	2.65213	0.00799862	0.0904078
ENSG00000166503.8	HDGFL3	protein_coding	HDGF like 3 [Source:HGNC Symbol;Acc:HGNC:24937]	1811.8	1825.18	1759.46	1671.3	1684.89	1685.04	3220.81	3861.34	3964.72	4204.21	4555.54	4136.75	93.69	110.22	112.89	122.76	131.02	117.85	3990.53	0.2229	0.0840409	2.65228	0.00799498	0.0904078
ENSG00000182544.8	MFSD5	protein_coding	major facilitator superfamily domain containing 5 [Source:HGNC Symbol;Acc:HGNC:28156]	1549.81	1566.26	1549.58	1567.53	1557.6	1544.88	952.828	911.676	916.617	1033.34	1088.8	1139.32	30.96	29.08	29.17	33.71	34.99	36.27	1007.1	0.230546	0.0869522	2.65141	0.00801569	0.0905228
ENSG00000052344.15	PRSS8	protein_coding	protease, serine 8 [Source:HGNC Symbol;Acc:HGNC:9491]	1569.88	1501.17	1640.45	1591.37	1594.92	1568.07	3062.11	2712.71	2516.12	3083.41	3238.69	3299.05	98.2	85.37	79	99.22	102.66	103.62	2985.34	0.214857	0.0810554	2.65074	0.00803154	0.0906239
ENSG00000171603.16	CLSTN1	protein_coding	calsyntenin 1 [Source:HGNC Symbol;Acc:HGNC:17447]	3898.31	3956	3904.33	3943.09	3869.97	3888.43	5351.21	4948.43	4898.54	5570.52	5632.55	5849.24	69.21	62.81	62.04	72.32	72.03	74.1	5375.06	0.166165	0.0627216	2.64924	0.00806724	0.0908707
ENSG00000186871.6	ERCC6L	protein_coding	ERCC excision repair 6 like, spindle assembly checkpoint helicase [Source:HGNC Symbol;Acc:HGNC:20794]	4075.09	4063.22	4065.96	4076.17	4073.77	4069.54	617.269	721.905	681.517	567.561	549.946	542.486	7.67	8.8	8.29	7.08	6.76	6.6	613.45	-0.282772	0.106726	-2.64951	0.00806081	0.0908707
ENSG00000068383.18	INPP5A	protein_coding	inositol polyphosphate-5-phosphatase A [Source:HGNC Symbol;Acc:HGNC:6076]	2501.51	2373.68	2527.48	2472.34	2641.44	2092.9	645.581	668.838	597.715	485.437	470.121	580.966	13.44	13.66	12.19	10.13	9.67	11.85	574.791	-0.311665	0.117719	-2.64753	0.00810827	0.091244
ENSG00000206341.7	HLA-H	unprocessed_pseudogene	major histocompatibility complex, class I, H (pseudogene) [Source:HGNC Symbol;Acc:HGNC:4965]	917.54	910.37	913.72	914.74	914.2	913.97	110.866	91.0107	83.4733	180.363	153.385	111.096	6.14	4.96	4.54	10.03	8.41	6	121.699	0.634231	0.239579	2.64728	0.00811428	0.091244
ENSG00000196531.10	NACA	protein_coding	nascent polypeptide-associated complex alpha subunit [Source:HGNC Symbol;Acc:HGNC:7629]	550.382	534.8	543.168	548.443	547.734	550.658	16095.4	17909	18124.8	15488.1	15665.4	15438.8	1491.09	1628.34	1644.18	1440.22	1435.06	1401.06	16453.6	-0.162091	0.0612881	-2.64474	0.0081753	0.0917773
ENSG00000279561.2	AL845472.1	TEC		3903.54	3896.37	3899.72	3898.96	3899.53	3899.3	225.054	216.582	188.352	167.626	145.332	141.313	2.92	2.76	2.39	2.18	1.87	1.8	180.711	-0.471338	0.178218	-2.64473	0.00817568	0.0917773
ENSG00000145439.11	CBR4	protein_coding	carbonyl reductase 4 [Source:HGNC Symbol;Acc:HGNC:25891]	1990.78	2260.32	2152.92	2513.01	2132.55	2141.31	396.633	392.402	360.977	266.239	340.383	287.728	9.15	8.88	8.15	6.16	7.76	6.5	340.736	-0.369041	0.139561	-2.6443	0.00818606	0.0918153
ENSG00000204520.12	MICA	protein_coding	MHC class I polypeptide-related sequence A [Source:HGNC Symbol;Acc:HGNC:7090]	1219.31	1208.12	1217.31	1216.54	1217.29	1211.94	723.997	834.14	804.83	940.008	908.003	959.745	30.13	34.05	32.8	39.27	37.38	39.12	861.787	0.250954	0.0949166	2.64394	0.00819467	0.0918334
ENSG00000168374.10	ARF4	protein_coding	ADP ribosylation factor 4 [Source:HGNC Symbol;Acc:HGNC:655]	1444.65	1467.86	1463.74	1474.92	1471.19	1434.75	3848.93	4349.46	4220.7	4544.69	4872.42	4662.66	133.35	147.89	143.19	158.05	166.93	158.25	4416.47	0.180949	0.0684545	2.64335	0.00820903	0.0919159
ENSG00000055332.16	EIF2AK2	protein_coding	eukaryotic translation initiation factor 2 alpha kinase 2 [Source:HGNC Symbol;Acc:HGNC:9437]	4407.5	4293.86	4037.94	4290.58	4033.79	4142.05	6967.41	7756.27	7966.47	8713.44	9042.53	8080.65	83.91	91.67	93.95	105.34	107.68	95.34	8087.81	0.187035	0.0707701	2.64285	0.00822113	0.091973
ENSG00000251022.6	THAP9-AS1	antisense_RNA	THAP9 antisense RNA 1 [Source:HGNC Symbol;Acc:HGNC:44172]	1261.59	1312.96	1356.57	1386.19	1390.52	1408.39	839.497	909.841	799.315	745.922	703.765	675.737	31.39	33.4	29.28	28	26.05	24.76	779.017	-0.261295	0.0988862	-2.64238	0.00823254	0.0920223
ENSG00000011376.9	LARS2	protein_coding	leucyl-tRNA synthetase 2, mitochondrial [Source:HGNC Symbol;Acc:HGNC:17095]	4168.78	3783.3	3939.95	3784.44	4074.14	3976.94	1043.85	1103.07	1175.07	999.656	858.911	935.861	13.36	13.85	14.72	12.84	10.86	11.73	1019.42	-0.248949	0.0942911	-2.64022	0.00828531	0.0924547
ENSG00000085999.11	RAD54L	protein_coding	RAD54 like (S. cerevisiae) [Source:HGNC Symbol;Acc:HGNC:9826]	2174.26	2332.22	2164.59	2386.15	2249.62	2351.82	770.528	565.82	624.236	539.766	541.565	463.749	17.13	12.34	13.59	12.05	11.91	10.11	584.277	-0.347188	0.131498	-2.64026	0.00828418	0.0924547
ENSG00000100867.14	DHRS2	protein_coding	dehydrogenase/reductase 2 [Source:HGNC Symbol;Acc:HGNC:18349]	1515.78	1505.43	1454.05	1511.04	1551.25	1464.95	1475.57	2364.05	1684.96	980.161	1381.93	1087.26	49.75	78.21	55.62	33.15	46.06	35.9	1495.72	-0.680139	0.257717	-2.6391	0.00831276	0.0925252
ENSG00000121057.12	AKAP1	protein_coding	A-kinase anchoring protein 1 [Source:HGNC Symbol;Acc:HGNC:367]	3724.15	3673.69	3652.08	3632.49	3778.67	3715.92	5045.17	5299.11	5273.71	4737.46	4497.3	4749.9	69.02	71.15	70.65	65.07	60.84	63.66	4933.77	-0.158641	0.0601024	-2.63952	0.00830244	0.0925252
ENSG00000138735.15	PDE5A	protein_coding	phosphodiesterase 5A [Source:HGNC Symbol;Acc:HGNC:8784]	3915.77	3873.92	3932.6	4543.37	3564.1	4286.3	505.532	583.653	581.691	399.876	506.839	428.379	6.38	7.23	7.18	5.07	6.31	5.28	501.003	-0.331957	0.125784	-2.63911	0.00831252	0.0925252
ENSG00000179841.8	AKAP5	protein_coding	A-kinase anchoring protein 5 [Source:HGNC Symbol;Acc:HGNC:375]	6075.74	6301.37	5810.39	6305.74	6110.9	5835.23	260.324	290.315	346.946	349.558	388.964	446.063	2.17	2.37	2.83	2.92	3.21	3.64	347.016	0.401406	0.152191	2.63752	0.00835149	0.0928776
ENSG00000168234.12	TTC39C	protein_coding	tetratricopeptide repeat domain 39C [Source:HGNC Symbol;Acc:HGNC:26595]	1650.59	1629.56	1873.35	1545.88	1623.38	1551.01	539.189	629.125	538.079	477.06	450.57	450.558	16.6	19.01	16.23	14.74	13.72	13.6	514.094	-0.305131	0.115777	-2.6355	0.00840143	0.093354
ENSG00000153339.13	TRAPPC8	protein_coding	trafficking protein particle complex 8 [Source:HGNC Symbol;Acc:HGNC:29169]	3721.81	3847.71	4221.08	4526.19	3944.25	4313.99	1334.07	1454.73	1313.19	1105.72	1276.99	1097.83	16.52	17.67	15.91	13.74	15.63	13.32	1263.77	-0.239655	0.0909453	-2.63515	0.00840998	0.0933699
ENSG00000196081.9	ZNF724	protein_coding	zinc finger protein 724 [Source:HGNC Symbol;Acc:HGNC:32460]	2072.32	2181.38	2246.06	2346.96	2388.1	2427.99	250.155	266.899	250.892	198.797	212.679	153.741	5.56	5.83	5.46	4.44	4.68	3.35	222.187	-0.449684	0.170697	-2.6344	0.00842857	0.0934973
ENSG00000148187.17	MRRF	protein_coding	mitochondrial ribosome recycling factor [Source:HGNC Symbol;Acc:HGNC:7234]	1246.67	1254.26	1177.73	1255.8	1337.61	1237.26	1102.82	1144.47	1133.49	1017.55	912.202	957.751	44.56	45.4	44.92	41.32	36.45	37.93	1044.73	-0.226866	0.0861739	-2.63266	0.00847193	0.0938991
ENSG00000116852.14	KIF21B	protein_coding	kinesin family member 21B [Source:HGNC Symbol;Acc:HGNC:29442]	8856.1	8902.24	8243.74	8324.2	8993.92	9714.97	99.1852	68.522	76.9508	60.3738	43.5776	35.6181	0.57	0.39	0.43	0.35	0.25	0.2	64.0141	-0.820043	0.311723	-2.63067	0.00852157	0.0943654
ENSG00000151353.14	TMEM18	protein_coding	transmembrane protein 18 [Source:HGNC Symbol;Acc:HGNC:25257]	1130.33	1183.73	1085.48	1239.58	1116.78	1212.38	1280.51	1229.2	1370.3	1045.68	1154.62	1119.97	55.81	52.59	58.48	45.75	49.77	47.82	1200.04	-0.22656	0.0861312	-2.6304	0.00852838	0.0943654
ENSG00000158169.12	FANCC	protein_coding	Fanconi anemia complementation group C [Source:HGNC Symbol;Acc:HGNC:3584]	3541.89	3247.86	3386.31	3365.98	2927.58	3276.7	824.155	802.299	837.613	700.513	694.68	689.577	12.69	12.12	12.63	10.81	10.58	10.4	758.156	-0.242851	0.0923538	-2.62957	0.00854931	0.0944519
ENSG00000197496.5	SLC2A10	protein_coding	solute carrier family 2 member 10 [Source:HGNC Symbol;Acc:HGNC:13444]	3445.22	3360.82	3776.44	3085.48	3416.03	3366.62	441.405	399.176	345.37	569.86	506.641	448.237	6.56	5.82	5.02	8.5	7.44	6.53	451.786	0.361365	0.137426	2.62952	0.00855058	0.0944519
ENSG00000128928.8	IVD	protein_coding	isovaleryl-CoA dehydrogenase [Source:HGNC Symbol;Acc:HGNC:6186]	2462.05	2548.13	2544.7	2370.55	2457.86	2474.94	3982.88	4014.53	4077.26	4367.88	4392.81	4826.9	81.36	80.47	81.56	89.56	88.71	96.59	4277.04	0.171124	0.0650922	2.62894	0.00856507	0.0945325
ENSG00000092140.14	G2E3	protein_coding	G2/M-phase specific E3 ubiquitin protein ligase [Source:HGNC Symbol;Acc:HGNC:20338]	2901.14	3402.35	3050.99	3110.91	3102.18	3368.57	1236.25	1218.29	1351.54	1139.39	1097.6	1005.5	19.85	19.19	21.23	18.35	17.42	15.81	1174.75	-0.234147	0.089137	-2.62682	0.0086186	0.0950434
ENSG00000125971.16	DYNLRB1	protein_coding	dynein light chain roadblock-type 1 [Source:HGNC Symbol;Acc:HGNC:15468]	500.761	495.227	498.182	500.24	499.733	498.318	1758.95	1632.84	1620.21	1924.83	1827.79	2005.26	178.34	162.48	160.85	195.89	183.24	199.16	1794.98	0.201296	0.0766457	2.62632	0.00863126	0.0951031
ENSG00000007384.15	RHBDF1	protein_coding	rhomboid 5 homolog 1 [Source:HGNC Symbol;Acc:HGNC:20561]	1757.96	1697.07	1708.13	1746.94	1842.24	1890.86	1099.24	979.824	918.992	1177.28	1152.29	1218.15	31.36	27.43	25.68	33.72	32.51	34.05	1090.96	0.243925	0.0928932	2.62587	0.00864282	0.0951507
ENSG00000280832.1	GSEC	antisense_RNA	G-quadruplex forming sequence containing lncRNA [Source:HGNC Symbol;Acc:HGNC:48645]	1488.24	1444.59	1439.74	1423.17	1436.46	1433.67	60.5792	67.9605	87.8393	113.382	98.7595	129.173	2.12	2.34	3.01	3.98	3.42	4.43	92.9476	0.66071	0.251656	2.62545	0.00865347	0.0951882
ENSG00000124313.13	IQSEC2	protein_coding	IQ motif and Sec7 domain 2 [Source:HGNC Symbol;Acc:HGNC:29059]	1696.82	1908.32	1907.9	1731.41	1871.87	1859.79	442.364	302.703	339.457	472.84	463.725	476.715	12.26	8.22	9.19	13.14	12.7	12.92	416.31	0.38132	0.145294	2.62447	0.00867833	0.0953817
ENSG00000103335.21	PIEZO1	protein_coding	piezo type mechanosensitive ion channel component 1 [Source:HGNC Symbol;Acc:HGNC:28993]	3011.12	2992.09	3084.71	2943.98	3000.74	3035.74	15925.3	14102	13318	15879.4	16157.6	17530.8	267.44	232.43	219	267.71	268.31	288.37	15485.6	0.193679	0.0738222	2.62359	0.00870084	0.0954694
ENSG00000177683.13	THAP5	protein_coding	THAP domain containing 5 [Source:HGNC Symbol;Acc:HGNC:23188]	2212.01	2327.94	2244.6	2496.25	2293.92	2364.07	1015.93	1113.97	1138.03	928.139	975.001	864.571	22.13	23.82	24.27	20.3	20.99	18.44	1005.95	-0.242579	0.0924586	-2.62365	0.00869919	0.0954694
ENSG00000239857.6	GET4	protein_coding	golgi to ER traffic protein 4 [Source:HGNC Symbol;Acc:HGNC:21690]	1713.2	1679.62	1687.09	1699.91	1658.88	1724.67	2308.66	2098.85	2286.66	2484.55	2648.96	2504.28	68.91	61.5	66.85	74.46	78.2	73.23	2388.66	0.18846	0.0718437	2.6232	0.00871092	0.0955001
ENSG00000156802.12	ATAD2	protein_coding	ATPase family, AAA domain containing 2 [Source:HGNC Symbol;Acc:HGNC:30123]	5249.36	5236.14	5274.21	5302.3	5282.08	5344.56	9283.77	10053.1	10193.4	9181.51	8764.31	8354.45	88.89	94.47	95.57	88.24	82.98	78.36	9305.11	-0.167458	0.0638466	-2.62281	0.00872068	0.0955274
ENSG00000155066.15	PROM2	protein_coding	prominin 2 [Source:HGNC Symbol;Acc:HGNC:20685]	3470.29	3757.72	3725.88	3461.73	3718.76	3392.24	1189.71	1110.01	1000.69	1220.43	1302.32	1388.75	16.78	15.37	13.83	17.28	18.17	19.19	1201.97	0.24667	0.0940964	2.62146	0.00875533	0.095827
ENSG00000173599.13	PC	protein_coding	pyruvate carboxylase [Source:HGNC Symbol;Acc:HGNC:8636]	2188.91	1750.64	2066.22	2144.51	2080.42	2193.46	1486.68	1333.63	1250.71	1137.84	1099.13	1205.56	36.39	32.06	29.98	27.99	26.63	28.92	1252.24	-0.239901	0.0915309	-2.62099	0.00876754	0.0958808
ENSG00000128951.13	DUT	protein_coding	deoxyuridine triphosphatase [Source:HGNC Symbol;Acc:HGNC:3078]	842.011	828.57	815.716	823.797	809.631	825.58	1331.01	1443.65	1426.47	1222.07	1275.27	1081.18	81.7	86.93	85.68	75.3	77.34	64.97	1296.47	-0.233935	0.0892922	-2.61988	0.00879605	0.0960327
ENSG00000140398.13	NEIL1	protein_coding	nei like DNA glycosylase 1 [Source:HGNC Symbol;Acc:HGNC:18448]	1229.54	1334.49	1194.74	1670.68	1433.92	1541.04	231.29	159.409	141.37	124.317	117.465	114.995	8.4	5.69	5.04	4.54	4.24	4.11	148.119	-0.575921	0.219827	-2.61988	0.008796	0.0960327
ENSG00000173898.11	SPTBN2	protein_coding	spectrin beta, non-erythrocytic 2 [Source:HGNC Symbol;Acc:HGNC:11276]	3233.05	3209.64	3454.36	3674.94	4161.36	3527.57	2437.79	2083.27	1930.56	1851.2	1510.04	1947.54	34.91	29.3	27.1	26.63	21.38	27.32	1960.05	-0.280122	0.106938	-2.61949	0.00880621	0.0960502
ENSG00000174483.19	BBS1	protein_coding	Bardet-Biedl syndrome 1 [Source:HGNC Symbol;Acc:HGNC:966]	2278.67	2049.77	1944.59	2092.9	2329.89	2189.48	498.716	526.038	499.922	641.468	573.171	633.279	11.76	12.2	11.55	15.19	13.38	14.65	562.104	0.280749	0.10719	2.61917	0.0088144	0.0960502
ENSG00000187867.8	PALM3	protein_coding	paralemmin 3 [Source:HGNC Symbol;Acc:HGNC:33274]	1917.94	2027.29	1974.43	1921.89	1972.33	1930.48	653.615	604.834	538.803	730.787	722.345	726.162	16.89	15.33	13.63	18.95	18.46	18.38	662.754	0.279178	0.106598	2.61897	0.00881959	0.0960502
ENSG00000178105.9	DDX10	protein_coding	DEAD-box helicase 10 [Source:HGNC Symbol;Acc:HGNC:2735]	1908.23	2313.07	2170.6	2365.74	2020.57	2379.56	822.767	792.195	851.781	658.037	761.229	636.151	19.03	17.99	19.3	15.28	17.42	14.42	753.703	-0.26997	0.103114	-2.61815	0.00884068	0.0962001
ENSG00000147687.18	TATDN1	protein_coding	TatD DNase domain containing 1 [Source:HGNC Symbol;Acc:HGNC:24220]	732.642	725.872	710.358	720.82	734.382	720.664	1808.03	2049.06	2037.02	1760.2	1634.58	1702.85	126.3	140.46	139.31	123.4	112.92	116.52	1831.96	-0.208535	0.079664	-2.61769	0.00885278	0.096252
ENSG00000151090.17	THRB	protein_coding	thyroid hormone receptor beta [Source:HGNC Symbol;Acc:HGNC:11799]	4699.12	4051.93	4460.36	4189.31	4781.93	4195.02	830.466	1030.63	935.431	857.463	697.641	715.075	9.56	11.65	10.56	9.92	7.94	8.08	844.457	-0.298651	0.114114	-2.61712	0.00886762	0.0963336
ENSG00000021355.12	SERPINB1	protein_coding	serpin family B member 1 [Source:HGNC Symbol;Acc:HGNC:3311]	1807.49	1750.77	1726.25	1690.3	1670.16	1767.5	1044.65	1184.42	1234.55	1362.86	1383.75	1322.75	30.45	33.88	35.24	39.88	39.89	37.77	1255.49	0.231862	0.0886149	2.61651	0.00888342	0.0963836
ENSG00000234741.7	GAS5	processed_transcript	growth arrest specific 5 (non-protein coding) [Source:HGNC Symbol;Acc:HGNC:16355]	490.258	483.131	482.06	497.938	487.363	490.277	8496.31	9415.21	8641.72	7687.44	8256.88	7696.73	879.54	956.59	875.97	798.81	845.17	780.52	8365.74	-0.16777	0.0641232	-2.61637	0.0088869	0.0963836
ENSG00000106608.16	URGCP	protein_coding	upregulator of cell proliferation [Source:HGNC Symbol;Acc:HGNC:30890]	2919.69	2917.93	2745.62	2837.74	2781.36	2781.08	1047.88	1051.52	1129.88	1222.39	1270.49	1258.25	18.73	18.44	19.78	21.92	22.46	22.03	1163.4	0.215057	0.0822097	2.61595	0.00889783	0.0964159
ENSG00000109184.14	DCUN1D4	protein_coding	defective in cullin neddylation 1 domain containing 4 [Source:HGNC Symbol;Acc:HGNC:28998]	2110.41	2322.14	2088.21	2421.16	2249.3	2071.35	1125.74	1161.69	1193.36	987.964	995.365	1013.68	25.81	26.12	26.77	22.74	22.56	22.76	1079.62	-0.21532	0.0823274	-2.61542	0.0089119	0.0964159
ENSG00000145730.20	PAM	protein_coding	peptidylglycine alpha-amidating monooxygenase [Source:HGNC Symbol;Acc:HGNC:8596]	2356.51	2280.44	2226.85	2393.45	2278.8	2288.15	894.083	1139.83	1098.07	849.887	903.15	828.795	19.62	24.57	23.59	18.73	19.61	17.83	952.31	-0.278939	0.106642	-2.61565	0.00890566	0.0964159
ENSG00000141504.11	SAT2	protein_coding	spermidine/spermine N1-acetyltransferase family member 2 [Source:HGNC Symbol;Acc:HGNC:23160]	655.082	607.733	628.058	618.459	639.661	626.929	306.731	287.365	291.301	374.869	393.085	355.733	24.66	22.66	22.92	30.24	31.24	28	334.847	0.34011	0.130161	2.61298	0.0089756	0.0967862
ENSG00000146281.5	PM20D2	protein_coding	peptidase M20 domain containing 2 [Source:HGNC Symbol;Acc:HGNC:21408]	4529.54	4522.37	4525.72	4526.74	4526.2	4525.97	639.173	681.498	672.53	570.401	500.57	569.31	7.14	7.47	7.36	6.4	5.53	6.23	605.582	-0.277365	0.106146	-2.61304	0.008974	0.0967862
ENSG00000182372.9	CLN8	protein_coding	CLN8, transmembrane ER and ERGIC protein [Source:HGNC Symbol;Acc:HGNC:2079]	2615.39	2823.31	2526.43	2395.35	2514.63	2581.7	556.286	538.976	612.493	675.088	682.913	703.296	10.94	10.4	11.79	13.31	13.26	13.54	628.179	0.270949	0.103685	2.61319	0.00897023	0.0967862
ENSG00000186812.12	ZNF397	protein_coding	zinc finger protein 397 [Source:HGNC Symbol;Acc:HGNC:18818]	3238.49	2991.57	2884.39	3281.79	3221.24	3333.69	508.46	588.942	540.246	485.32	434.826	384.859	8.15	9.26	8.48	7.81	6.89	6.05	490.432	-0.328315	0.125624	-2.61347	0.0089627	0.0967862
ENSG00000196507.10	TCEAL3	protein_coding	transcription elongation factor A like 3 [Source:HGNC Symbol;Acc:HGNC:28247]	940.362	932.496	935.239	936.747	936.813	936.494	1654.05	1909.06	1744.4	2093.05	2125.09	1931.4	89.33	101.2	92.25	113.46	113.48	102.18	1909.51	0.21223	0.0812352	2.61254	0.00898724	0.0968321
ENSG00000168078.9	PBK	protein_coding	PDZ binding kinase [Source:HGNC Symbol;Acc:HGNC:18282]	1882.8	1860.39	1877.74	1840.35	1826.88	1891.63	960.669	1072.28	1057.43	884.275	889.293	852.754	26.08	28.56	28.1	24.09	23.87	22.67	952.782	-0.235134	0.0900428	-2.61135	0.00901848	0.0970892
ENSG00000186814.13	ZSCAN30	protein_coding	zinc finger and SCAN domain containing 30 [Source:HGNC Symbol;Acc:HGNC:33517]	2683.8	3616	2402.82	2873.03	2201.78	1903.07	72.4608	60.1327	66.8635	85.1614	118.855	113.118	1.43	1.17	1.29	1.69	2.32	2.19	86.1046	0.663025	0.253947	2.61088	0.00903107	0.097145
ENSG00000169710.8	FASN	protein_coding	fatty acid synthase [Source:HGNC Symbol;Acc:HGNC:3594]	5037.12	5142.25	5086.4	5082.72	5073.1	5329.2	27796.1	19996.4	23189	27492.1	26969.6	29756.8	274.3	193.68	224.08	272.33	263.15	287.65	25866.5	0.246556	0.0944722	2.60983	0.00905875	0.0973631
ENSG00000135605.12	TEC	protein_coding	tec protein tyrosine kinase [Source:HGNC Symbol;Acc:HGNC:11719]	2704.69	2884.5	3504.72	2628.07	2430.22	2851.91	104.539	86.2581	84.284	139.265	169.925	112.886	1.88	1.52	1.48	2.51	3.02	1.98	116.199	0.605229	0.232001	2.60874	0.00908768	0.0975941
ENSG00000163781.12	TOPBP1	protein_coding	topoisomerase (DNA) II binding protein 1 [Source:HGNC Symbol;Acc:HGNC:17008]	3175.94	3156.46	3318.54	3216.9	3187.12	3155.55	3041.41	3215.15	2966.22	2760.5	2781.64	2620.08	48.04	49.84	45.88	43.76	43.46	40.55	2897.49	-0.176206	0.0675598	-2.60815	0.00910328	0.0976818
ENSG00000100994.11	PYGB	protein_coding	glycogen phosphorylase B [Source:HGNC Symbol;Acc:HGNC:9723]	3658.04	3805.66	3761.08	3750.84	3789.54	3675.9	2753.63	2555.23	2632.76	2897.55	2898.98	3298.96	37.23	33.91	34.86	39.33	38.76	43.7	2839.51	0.196701	0.0755058	2.60512	0.00918431	0.0984708
ENSG00000169919.16	GUSB	protein_coding	glucuronidase beta [Source:HGNC Symbol;Acc:HGNC:4696]	1700.39	1588.73	1648.09	1709.95	1799.71	1676.43	2305.55	2421.59	2341.88	1960.78	2025.83	2198.19	69.14	71.28	68.77	59.03	60.08	64.57	2208.97	-0.191229	0.0734145	-2.60478	0.00919333	0.0984871
ENSG00000035499.12	DEPDC1B	protein_coding	DEP domain containing 1B [Source:HGNC Symbol;Acc:HGNC:24902]	1909.34	1857.38	1991.38	2010.14	1819.37	1869.53	695.359	774.087	732.279	628.26	621.012	586.923	18.43	20.13	19	16.71	16.27	15.23	672.985	-0.262032	0.100619	-2.60419	0.00920911	0.0985013
ENSG00000218416.4	PP14571	processed_transcript	uncharacterized LOC100130449 [Source:NCBI gene;Acc:100130449]	1435.49	1184.15	1329.7	1168.8	1238.88	1332.08	82.9742	92.9428	84.1748	122.185	136.052	126.176	3.28	3.61	3.26	4.85	5.32	4.89	107.411	0.565501	0.217152	2.60417	0.00920965	0.0985013
ENSG00000103056.11	SMPD3	protein_coding	sphingomyelin phosphodiesterase 3 [Source:HGNC Symbol;Acc:HGNC:14240]	5274.54	4135.02	3280.85	4634.15	5271.2	5270.97	40.84	47.6734	69.1756	26.5372	19.8705	31.2179	0.45	0.52	0.75	0.29	0.22	0.33	39.2446	-1.00495	0.386117	-2.6027	0.00924938	0.0988147
ENSG00000214517.9	PPME1	protein_coding	protein phosphatase methylesterase 1 [Source:HGNC Symbol;Acc:HGNC:30178]	2326.69	2308.62	2408.52	2282.2	2352.69	2374.54	1719.3	1668.8	1663.56	1957.92	1893.97	1886.55	37.12	35.36	35.17	42.44	40.44	39.9	1798.35	0.183634	0.0705601	2.60253	0.009254	0.0988147
ENSG00000141376.22	BCAS3	protein_coding	BCAS3, microtubule associated cell migration factor [Source:HGNC Symbol;Acc:HGNC:14347]	1702.3	1713.38	1678.06	1684.45	1673.85	1655.72	21395.9	18725	21649.4	22345.5	22515.4	26308.3	642.27	551.66	636.34	673.31	668.3	773.61	22156.4	0.204311	0.0785197	2.60204	0.00926717	0.0988749
ENSG00000113812.13	ACTR8	protein_coding	ARP8 actin related protein 8 homolog [Source:HGNC Symbol;Acc:HGNC:14672]	2381.3	2519.24	2460.2	2223.14	2227.48	2081.93	634.704	650.511	675.022	739.19	762.127	844.833	13.89	13.97	14.46	16.24	16.49	18.11	717.726	0.260928	0.100362	2.59987	0.00932578	0.0994194
ENSG00000041353.9	RAB27B	protein_coding	RAB27B, member RAS oncogene family [Source:HGNC Symbol;Acc:HGNC:9767]	7102.54	7095.37	5929.03	5842.57	7099.2	6141.15	235.509	272.353	367.363	409.395	350.44	421.655	1.83	2.08	2.79	3.19	2.69	3.21	342.783	0.435338	0.167541	2.59839	0.00936614	0.0994213
ENSG00000078081.7	LAMP3	protein_coding	lysosomal associated membrane protein 3 [Source:HGNC Symbol;Acc:HGNC:14582]	2372.06	3167.53	3192.72	2487.89	2747.1	2542.65	151.161	96.7863	123.764	217.171	175.386	157.158	2.8	1.76	2.24	4.03	3.21	2.85	153.559	0.562994	0.216686	2.5982	0.00937137	0.0994213
ENSG00000117399.13	CDC20	protein_coding	cell division cycle 20 [Source:HGNC Symbol;Acc:HGNC:1723]	1173.39	1169.42	1222.14	1247.54	1249.19	1225.4	2761.58	2291.4	2412.01	2131.87	2096.46	2210.03	115.02	93.67	98.37	89.12	86.34	90.17	2317.23	-0.213557	0.082191	-2.5983	0.00936859	0.0994213
ENSG00000123159.15	GIPC1	protein_coding	GIPC PDZ domain containing family member 1 [Source:HGNC Symbol;Acc:HGNC:1226]	1539.17	1467.48	1538.52	1520.86	1484.23	1521.72	4171.25	3882.08	3756.03	4246.07	4544.94	4542.39	139.52	127.45	123.02	142.57	150.32	148.84	4190.45	0.175026	0.067364	2.59822	0.00937097	0.0994213
ENSG00000129083.12	COPB1	protein_coding	coatomer protein complex subunit beta 1 [Source:HGNC Symbol;Acc:HGNC:2231]	2815.27	2940.95	2951.93	2782.35	2891.2	2849.77	6224.8	6714.33	6701.63	7335.01	7521.03	7065.69	109.63	116.05	115.58	129.67	130.97	121.91	6927.08	0.158089	0.0608147	2.59952	0.00933533	0.0994213
ENSG00000259479.6	SORD2P	transcribed_unprocessed_pseudogene	sorbitol dehydrogenase 2, pseudogene [Source:HGNC Symbol;Acc:HGNC:49919]	1311.28	1325.6	1453.23	935.216	1075.35	1038.11	162.202	192.891	177.742	303.816	223.572	212.707	6.98	8.13	7.47	13.13	9.51	8.98	212.047	0.473882	0.182354	2.59868	0.00935817	0.0994213
ENSG00000274750.2	HIST1H3E	protein_coding	histone cluster 1 H3 family member e [Source:HGNC Symbol;Acc:HGNC:4769]	2500.54	2493.37	2496.72	2458.93	2497.2	2496.97	356.855	351.971	331.29	448.331	438.861	410.604	7.25	7.01	6.59	9.14	8.81	8.17	389.65	0.318141	0.122479	2.59752	0.00939006	0.0995391
ENSG00000119397.16	CNTRL	protein_coding	centriolin [Source:HGNC Symbol;Acc:HGNC:1858]	4181.45	4207.14	4891.27	4996.9	4917.88	4314.44	590.474	560.119	443.936	446.197	407.751	396.341	6.53	6.09	4.81	4.96	4.46	4.3	474.154	-0.347598	0.133943	-2.59512	0.00945585	0.100131
ENSG00000196182.10	STK40	protein_coding	serine/threonine kinase 40 [Source:HGNC Symbol;Acc:HGNC:21373]	3192.7	2938.29	2937.54	2688.06	2711.14	2965.1	850.727	841.073	867.935	1017.84	1029.35	955.596	14.82	14.4	14.82	17.8	17.74	16.32	927.075	0.227438	0.0876472	2.59493	0.00946114	0.100131
ENSG00000198502.5	HLA-DRB5	protein_coding	major histocompatibility complex, class II, DR beta 5 [Source:HGNC Symbol;Acc:HGNC:4953]	1081.54	1074.37	1077.72	1078.74	1078.2	1077.97	415.76	409.294	388.417	544.369	538.204	441.926	19.48	18.84	17.85	25.65	24.95	20.31	456.328	0.325446	0.125436	2.59453	0.00947212	0.100167
ENSG00000137207.11	YIPF3	protein_coding	Yip1 domain family member 3 [Source:HGNC Symbol;Acc:HGNC:21023]	1257.61	1249.67	1241.47	1261.52	1307.86	1305.19	2205.17	2233.14	2300.1	2467.63	2551.25	2574	87.78	87.25	89.66	98.6	100.42	100.37	2388.54	0.172065	0.0663285	2.59413	0.00948314	0.100202
ENSG00000171853.15	TRAPPC12	protein_coding	trafficking protein particle complex 12 [Source:HGNC Symbol;Acc:HGNC:24284]	1075.9	1060.27	980.795	996.389	961.499	969.056	655.012	558.124	663.719	749.801	746.463	771.874	32.9	27.52	32.65	37.81	37.08	37.98	690.827	0.271595	0.104743	2.59297	0.00951499	0.100458
ENSG00000213689.11	TREX1	protein_coding	three prime repair exonuclease 1 [Source:HGNC Symbol;Acc:HGNC:12269]	728.603	709.875	747.262	678.655	803.134	670.797	158.626	147.443	139.63	207.937	194.685	204.754	11.08	10.16	9.58	14.66	13.48	14.08	175.517	0.448226	0.172901	2.59238	0.00953145	0.100551
ENSG00000117868.15	ESYT2	protein_coding	extended synaptotagmin 2 [Source:HGNC Symbol;Acc:HGNC:22211]	3911.67	3922.92	3902.51	3846.54	3911.38	3924.5	4697.2	4877.83	4862.62	4341.06	4227.21	4416.69	60.85	62.02	61.68	56.45	54.15	56.05	4570.44	-0.152452	0.0588591	-2.59012	0.00959436	0.101134
ENSG00000130768.14	SMPDL3B	protein_coding	sphingomyelin phosphodiesterase acid like 3B [Source:HGNC Symbol;Acc:HGNC:21416]	1618.07	1608.69	1600.42	1614.47	1538.1	1605.61	194.707	196.876	210.257	228.534	293.467	283.585	6.16	6.12	6.52	7.26	9.19	8.8	234.573	0.418403	0.161609	2.58899	0.00962583	0.101384
ENSG00000138160.5	KIF11	protein_coding	kinesin family member 11 [Source:HGNC Symbol;Acc:HGNC:6388]	4681.54	4674.37	4677.72	4678.74	4678.2	4677.97	2886.75	2918.68	3207.31	2849.87	2513.62	2448.77	31.2	30.96	33.95	30.92	26.87	25.93	2804.17	-0.206985	0.0800095	-2.587	0.00968152	0.101726
ENSG00000164199.16	ADGRV1	protein_coding	adhesion G protein-coupled receptor V1 [Source:HGNC Symbol;Acc:HGNC:17416]	3615.76	3297.83	3781.59	4721.15	4568.59	3938.64	296.937	351.98	281.713	200.733	229.525	265.776	3.82	4.44	3.51	2.55	2.91	3.32	271.312	-0.421634	0.162955	-2.58742	0.00966964	0.101726
ENSG00000185924.6	RTN4RL1	protein_coding	reticulon 4 receptor like 1 [Source:HGNC Symbol;Acc:HGNC:21329]	3446.54	3439.37	3442.72	3443.74	3443.2	3442.97	1511.23	1425.73	1385.58	1570.41	1698.16	1713.66	22.19	20.55	19.93	23.15	24.66	24.65	1550.79	0.205033	0.0792517	2.58711	0.00967847	0.101726
ENSG00000092094.10	OSGEP	protein_coding	O-sialoglycoprotein endopeptidase [Source:HGNC Symbol;Acc:HGNC:18028]	1449.33	1388.21	1269.75	1323.93	1422.26	1456.18	619.131	672.859	585.886	554.513	499.939	479.487	22.63	24.13	20.95	20.34	18.06	17.17	568.621	-0.291681	0.11277	-2.58651	0.00969529	0.101789
ENSG00000128283.6	CDC42EP1	protein_coding	CDC42 effector protein 1 [Source:HGNC Symbol;Acc:HGNC:17014]	2002.54	1896.66	1897.13	1891.52	1999.2	1884.74	159.403	115.171	117.539	82.1289	80.4572	94.4126	4.18	2.97	3.02	2.17	2.09	2.43	108.177	-0.605833	0.234272	-2.58602	0.00970901	0.101851
ENSG00000011523.13	CEP68	protein_coding	centrosomal protein 68 [Source:HGNC Symbol;Acc:HGNC:29076]	5575.81	4919.52	4826.34	5549.98	5557.67	4997.04	511.482	604.372	568.196	462.449	398.695	485.324	4.95	5.74	5.38	4.49	3.81	4.59	505.084	-0.31688	0.122568	-2.58533	0.00972866	0.101976
ENSG00000110628.13	SLC22A18	protein_coding	solute carrier family 22 member 18 [Source:HGNC Symbol;Acc:HGNC:10964]	1179.66	1251.42	1218.46	1235.02	1080.75	1159.54	263.804	199.733	199.436	267.229	358.858	283.223	11.25	8.35	8.32	11.43	15.12	11.82	262.042	0.448154	0.173583	2.58178	0.00982915	0.102947
ENSG00000184867.13	ARMCX2	protein_coding	armadillo repeat containing, X-linked 2 [Source:HGNC Symbol;Acc:HGNC:16869]	1952.51	2121.05	2433.93	2079.37	1718.05	2007.63	266.708	271.477	184.279	304.765	410.846	292.29	6.61	6.6	4.47	7.58	10.07	7.09	288.382	0.477343	0.184913	2.58145	0.00983867	0.102965
ENSG00000006607.13	FARP2	protein_coding	FERM, ARH/RhoGEF and pleckstrin domain protein 2 [Source:HGNC Symbol;Acc:HGNC:16460]	3216.79	3041.82	3090.4	3384.11	3685.1	2864.45	1877.54	1897.06	1965.18	1550.81	1387.24	1862.37	29.63	29.4	30.37	24.58	21.65	28.79	1756.7	-0.256753	0.0995858	-2.57821	0.00993132	0.103852
ENSG00000111679.16	PTPN6	protein_coding	protein tyrosine phosphatase, non-receptor type 6 [Source:HGNC Symbol;Acc:HGNC:9658]	1361.44	1394.64	1429.35	1456.37	1343.54	1417.56	1047.57	912.128	904.616	1071.97	1179.21	1138.96	37.83	32.34	31.99	38.87	42.12	40.29	1042.41	0.241978	0.0938805	2.57751	0.00995161	0.103981
ENSG00000162078.11	ZG16B	protein_coding	zymogen granule protein 16B [Source:HGNC Symbol;Acc:HGNC:30456]	688.302	671.575	676.848	687.428	679.156	669.885	385.474	375.64	392.735	447.707	473.441	503.232	28.71	27.46	28.65	33.47	34.88	36.72	429.701	0.304388	0.118119	2.57695	0.00996749	0.10403
ENSG00000186603.5	HPDL	protein_coding	4-hydroxyphenylpyruvate dioxygenase like [Source:HGNC Symbol;Acc:HGNC:28242]	1450.54	1443.37	1446.72	1447.74	1447.2	1446.97	1046.11	1026.88	1057.72	854.803	835.584	961.428	36.56	35.22	36.19	29.98	28.87	32.91	963.756	-0.236687	0.0918533	-2.57679	0.00997211	0.10403
ENSG00000128274.15	A4GALT	protein_coding	alpha 1,4-galactosyltransferase (P blood group) [Source:HGNC Symbol;Acc:HGNC:18149]	1602.66	1537.31	1601.64	1628.51	1569.6	1563.03	1079.88	918.471	919.695	1081.23	1193.31	1196.53	34.49	28.78	28.76	34.66	37.68	37.43	1064.85	0.249507	0.0968754	2.57554	0.0100083	0.104325
ENSG00000030582.17	GRN	protein_coding	granulin precursor [Source:HGNC Symbol;Acc:HGNC:4601]	1548.15	1502.36	1498	1575.71	1539.15	1565.1	10633.5	9412.42	9373.05	10545.9	11344.6	11300.4	349.65	303.76	301.78	348.1	368.86	364.01	10435	0.173855	0.0675235	2.57473	0.0100319	0.104487
ENSG00000006634.7	DBF4	protein_coding	DBF4 zinc finger [Source:HGNC Symbol;Acc:HGNC:17364]	1555.84	1773.8	1585.23	1668.34	1776.96	1677.25	1393.27	1358.56	1567.3	1301.87	1160.23	1225.33	42.18	40.37	46.43	39.56	34.7	36.31	1334.43	-0.22875	0.0888735	-2.57389	0.0100563	0.104576
ENSG00000063046.17	EIF4B	protein_coding	eukaryotic translation initiation factor 4B [Source:HGNC Symbol;Acc:HGNC:3285]	2955.97	3061.18	3057.48	3044.95	2982.51	2952.48	26623.3	27240.8	27269.3	23737.9	24774	25356.5	447.44	449.33	448.77	400.47	411.71	417.45	25833.7	-0.135369	0.0526041	-2.57334	0.0100721	0.104576
ENSG00000157020.17	SEC13	protein_coding	SEC13 homolog, nuclear pore and COPII coat complex component [Source:HGNC Symbol;Acc:HGNC:10697]	1222.81	1214.84	1220.58	1216.21	1214.6	1224.93	4721.58	4258.74	4408.29	4954.38	4968.55	5069.55	195.87	173.38	179.06	206.3	203.8	206	4730.17	0.162947	0.0633213	2.57334	0.0100722	0.104576
ENSG00000163875.15	MEAF6	protein_coding	MYST/Esa1 associated factor 6 [Source:HGNC Symbol;Acc:HGNC:25674]	1331.96	1312.98	1310.14	1236.18	1344.32	1346.52	1493.15	1735.98	1613	1977.77	1871.76	1772.28	57.5	65.61	60.82	76.45	71.27	66.85	1743.99	0.215407	0.0836848	2.57403	0.0100521	0.104576
ENSG00000180694.13	TMEM64	protein_coding	transmembrane protein 64 [Source:HGNC Symbol;Acc:HGNC:25441]	3326.18	3448.74	3356.91	3379.23	3277.97	3351.49	39053.7	49113.4	43447.6	37957.2	41168.1	33019.6	588.39	726.21	640.95	574.04	613.3	487.32	40626.8	-0.231127	0.0898535	-2.57226	0.0101037	0.10482
ENSG00000080839.11	RBL1	protein_coding	RB transcriptional corepressor like 1 [Source:HGNC Symbol;Acc:HGNC:9893]	5096.65	5359.16	5221.82	5381.41	5072.21	5501.97	714.728	736.445	804.562	631.257	651.513	606.305	6.86	6.93	7.56	6.08	6.18	5.7	690.8	-0.259266	0.100898	-2.56959	0.010182	0.105549
ENSG00000075151.20	EIF4G3	protein_coding	eukaryotic translation initiation factor 4 gamma 3 [Source:HGNC Symbol;Acc:HGNC:3298]	5078.52	4977.93	5161.58	5051.35	4913.88	4977.15	4563.92	5031.18	4732.58	4342.21	4232.36	4225.51	45.92	49.68	46.62	43.85	42.1	41.64	4521.31	-0.162235	0.0631852	-2.56762	0.01024	0.105993
ENSG00000143850.13	PLEKHA6	protein_coding	pleckstrin homology domain containing A6 [Source:HGNC Symbol;Acc:HGNC:17053]	4474.72	4821.37	4008.76	4050.25	4247.33	5092.01	1474.02	1300.76	1493.25	1804.46	1773.34	1492.11	16.82	14.57	16.68	20.66	20	16.68	1556.3	0.24475	0.0953229	2.56758	0.010241	0.105993
ENSG00000065833.8	ME1	protein_coding	malic enzyme 1 [Source:HGNC Symbol;Acc:HGNC:6983]	3192.54	3185.37	3188.72	3189.74	3189.2	3188.97	2090.43	2470.57	2484.48	2662.79	2732.92	2732.23	33.15	38.45	38.57	42.38	42.85	42.44	2528.9	0.206413	0.0804115	2.56695	0.0102596	0.106102
ENSG00000169129.14	AFAP1L2	protein_coding	actin filament associated protein 1 like 2 [Source:HGNC Symbol;Acc:HGNC:25901]	2738.52	3020.61	3539.75	2918.07	3223.79	3571.42	357.374	353.691	248.041	268.212	240.897	169.491	5.73	5.57	3.89	4.32	3.82	2.66	272.965	-0.503738	0.196314	-2.56599	0.0102883	0.106315
ENSG00000140416.19	TPM1	protein_coding	tropomyosin 1 [Source:HGNC Symbol;Acc:HGNC:12010]	1331.46	1339.92	1339.82	1341.44	1323.43	1354.76	5402.4	5968.88	5766.24	5113.22	5224.53	4991.71	204.1	221.35	213.31	193.87	195.18	184.75	5411.33	-0.161121	0.062802	-2.56554	0.0103014	0.106367
ENSG00000196584.2	XRCC2	protein_coding	X-ray repair cross complementing 2 [Source:HGNC Symbol;Acc:HGNC:12829]	4095.56	4051.21	4119.51	4034.54	4173.5	4104.67	625.289	614.043	564.351	549.758	463.58	448.307	7.72	7.44	6.82	6.81	5.66	5.42	544.215	-0.303389	0.118377	-2.56291	0.0103799	0.107093
ENSG00000186260.16	MKL2	protein_coding	MKL1/myocardin like 2 [Source:HGNC Symbol;Acc:HGNC:29819]	6737.5	6294.09	6232.29	6563.79	6784.72	6290.73	3366.73	3554.27	3651.51	3225.43	2769.65	3216.52	26.26	27.22	27.9	25.27	21.38	24.6	3297.33	-0.197151	0.0769384	-2.56245	0.0103938	0.107152
ENSG00000110042.7	DTX4	protein_coding	deltex E3 ubiquitin ligase 4 [Source:HGNC Symbol;Acc:HGNC:29151]	5084.48	4312.87	4556.11	5268.84	5460.2	5459.97	156.705	143.278	189.623	121.414	98.6508	119.763	1.58	1.43	1.88	1.23	0.99	1.19	138.248	-0.52841	0.206293	-2.56146	0.0104234	0.107253
ENSG00000125247.15	TMTC4	protein_coding	transmembrane and tetratricopeptide repeat containing 4 [Source:HGNC Symbol;Acc:HGNC:25904]	2446.88	2653.84	2879.73	2750.16	3381.78	2998.34	442.69	416.665	377.649	359.092	277.711	327.688	7.9	7.29	6.59	6.42	4.89	5.72	366.939	-0.357603	0.139604	-2.56156	0.0104204	0.107253
ENSG00000143891.16	GALM	protein_coding	galactose mutarotase [Source:HGNC Symbol;Acc:HGNC:24063]	2305.54	2240.42	2301.72	2083.69	2182.89	2155.91	176.074	215.726	226.886	282.623	265.69	272.145	4.03	4.84	5.08	6.49	6.01	6.1	239.856	0.408006	0.159296	2.5613	0.0104281	0.107253
ENSG00000120802.13	TMPO	protein_coding	thymopoietin [Source:HGNC Symbol;Acc:HGNC:11875]	3173.78	3095.97	3110.3	3076.83	3117.32	3040.22	8470.1	8564.44	8818.94	8232.25	7564.55	7339.05	138.06	137.03	140.76	134.71	121.92	117.2	8165.04	-0.160466	0.0626815	-2.56002	0.0104667	0.107566
ENSG00000146859.6	TMEM140	protein_coding	transmembrane protein 140 [Source:HGNC Symbol;Acc:HGNC:21870]	1818.54	1811.37	1814.72	1815.74	1815.2	1814.97	311.548	305.405	317.301	371.594	388.869	409.233	8.68	8.36	8.65	10.38	10.72	11.17	350.656	0.324913	0.126981	2.55875	0.0105048	0.107705
ENSG00000171105.13	INSR	protein_coding	insulin receptor [Source:HGNC Symbol;Acc:HGNC:6091]	6651.82	7197.36	6818.02	7462.91	7041.48	7872.93	501.738	419.452	408.784	374.306	349.05	326.965	3.54	2.9	2.82	2.65	2.44	2.26	396.684	-0.341134	0.133318	-2.55879	0.0105036	0.107705
ENSG00000171241.8	SHCBP1	protein_coding	SHC binding and spindle associated 1 [Source:HGNC Symbol;Acc:HGNC:29547]	2662.12	2579.92	2908.55	2630.44	2854.15	2693.07	1462.72	1513.99	1498.15	1362.52	1239.54	1290.47	27.21	27.63	27.29	25.44	22.79	23.51	1394.57	-0.200663	0.0784085	-2.5592	0.0104914	0.107705
ENSG00000204272.12	NBDY	protein_coding	negative regulator of P-body association [Source:HGNC Symbol;Acc:HGNC:50713]	892.255	928.696	980.015	884.085	970.038	939.867	700.138	735.508	713.229	820.949	835.026	872.934	38	39.17	37.89	44.72	44.8	46.41	779.63	0.236754	0.0925737	2.55747	0.0105437	0.10802
ENSG00000197355.10	UAP1L1	protein_coding	UDP-N-acetylglucosamine pyrophosphorylase 1 like 1 [Source:HGNC Symbol;Acc:HGNC:28082]	3171.91	3212.01	3167.54	3145.9	3187.61	3216.42	1227.68	1075.78	991.368	1407.9	1249.83	1267.59	19.5	16.77	15.42	22.45	19.63	19.72	1203.35	0.252721	0.0988347	2.55701	0.0105576	0.108077
ENSG00000131100.12	ATP6V1E1	protein_coding	ATPase H+ transporting V1 subunit E1 [Source:HGNC Symbol;Acc:HGNC:857]	1141.23	1094.6	1110.87	1116.17	1125.08	1125.89	2999.06	3145.5	3192.73	3436.61	3697.55	3387.2	135.54	139.52	141.29	155.9	165.24	149.96	3309.77	0.171273	0.0670888	2.55293	0.0106821	0.109267
ENSG00000156970.12	BUB1B	protein_coding	BUB1 mitotic checkpoint serine/threonine kinase B [Source:HGNC Symbol;Acc:HGNC:1149]	3108.29	3208.07	3333.8	3031.42	3011.76	3052.52	1648.61	1629.8	1694.45	1554.71	1421.53	1313.32	26.69	25.91	26.86	25.28	22.76	20.84	1543.72	-0.214589	0.0840652	-2.55265	0.0106905	0.109268
ENSG00000145526.11	CDH18	protein_coding	cadherin 18 [Source:HGNC Symbol;Acc:HGNC:1757]	1925.53	2109.42	2152.7	2311.26	2373.27	2325.47	160.819	267.503	191.13	219.266	353.295	325.963	3.71	6.05	4.32	5.08	8.05	7.36	252.973	0.539003	0.211189	2.55223	0.0107036	0.109317
ENSG00000082805.19	ERC1	protein_coding	ELKS/RAB6-interacting/CAST family member 1 [Source:HGNC Symbol;Acc:HGNC:17072]	7221.73	7206.34	6217.55	6422.92	6479.09	7553.3	1134.99	1099.96	1355.35	1087.96	942.207	958.226	8.4	7.99	9.81	8.08	6.9	6.95	1096.41	-0.264984	0.103841	-2.55181	0.0107163	0.109362
ENSG00000114670.13	NEK11	protein_coding	NIMA related kinase 11 [Source:HGNC Symbol;Acc:HGNC:18593]	1845.26	1996.75	2092.34	2189.63	2053.33	2180.94	132.076	133.013	121.784	87.7763	90.288	86.2503	3.25	3.21	2.93	2.17	2.2	2.08	108.525	-0.548735	0.215137	-2.55064	0.0107527	0.109543
ENSG00000137970.7	RPL7P9	processed_pseudogene	ribosomal protein L7 pseudogene 9 [Source:HGNC Symbol;Acc:HGNC:37028]	568.57	561.39	564.75	565.76	565.22	564.99	1057.51	1180.43	1268.93	989.417	1031.91	948.482	94.66	103.63	111.16	88.88	91.26	83.11	1079.45	-0.241801	0.0948082	-2.55042	0.0107592	0.109543
ENSG00000144711.13	IQSEC1	protein_coding	IQ motif and Sec7 domain 1 [Source:HGNC Symbol;Acc:HGNC:29112]	4322.19	4361.14	4259.97	4378.54	4380.34	4280.99	1944.32	1677.36	1746.72	1523.64	1500.55	1613.53	22.71	19.23	19.98	17.86	17.33	18.45	1667.7	-0.210998	0.0827266	-2.55054	0.0107555	0.109543
ENSG00000116661.10	FBXO2	protein_coding	F-box protein 2 [Source:HGNC Symbol;Acc:HGNC:13581]	1334.66	1298.8	1344.37	1328.59	1190.5	1322.17	315.996	322.589	279.252	364.313	463.61	361.164	12.27	12.3	10.62	14.21	17.8	13.74	351.157	0.368426	0.144476	2.55008	0.0107697	0.109555
ENSG00000138413.13	IDH1	protein_coding	isocitrate dehydrogenase (NADP(+)) 1, cytosolic [Source:HGNC Symbol;Acc:HGNC:5382]	2145.41	2147.46	2139.85	2150.09	2133.05	2128.24	3583.03	3611.9	4221.51	4210.13	4224.23	4764.99	84.64	83.74	97.65	99.83	98.68	110.26	4102.61	0.209481	0.0821545	2.54985	0.010777	0.109555
ENSG00000234231.3	AC093616.1	unprocessed_pseudogene		1916.54	1909.37	1912.72	1913.74	1913.2	1912.97	96.6343	64.7072	104.94	64.4394	40.3672	51.4603	2.54	1.68	2.71	1.71	1.05	1.33	70.4247	-0.768786	0.301535	-2.54957	0.0107855	0.109557
ENSG00000071575.11	TRIB2	protein_coding	tribbles pseudokinase 2 [Source:HGNC Symbol;Acc:HGNC:30809]	2298.79	2405.95	2305.21	2349.79	2323.87	2520.16	2200.5	2061.32	1873.97	1907.22	1745.49	1560.52	47.03	43.24	39.22	40.91	36.89	32.68	1891.5	-0.2363	0.0927155	-2.54866	0.0108138	0.10976
ENSG00000196935.8	SRGAP1	protein_coding	SLIT-ROBO Rho GTPase activating protein 1 [Source:HGNC Symbol;Acc:HGNC:17382]	8691.92	8599.25	8268.4	8680.3	8524.18	8602.56	2874.4	3018.06	2997.69	3344.7	3299.85	3280.99	16.97	17.5	17.34	19.84	19.27	18.98	3135.95	0.158988	0.06239	2.5483	0.0108249	0.109787
ENSG00000115993.12	TRAK2	protein_coding	trafficking kinesin protein 2 [Source:HGNC Symbol;Acc:HGNC:13206]	5785.2	5784.9	5521.36	5814.12	5581.91	5564.3	2552.06	2949.36	3048.67	3210.4	3446.99	3190.77	22.74	25.79	26.6	28.72	30.37	27.86	3066.38	0.203589	0.0799774	2.54559	0.0109094	0.110369
ENSG00000130813.17	C19orf66	protein_coding	chromosome 19 open reading frame 66 [Source:HGNC Symbol;Acc:HGNC:25649]	1625.01	1729.6	1682.32	1733.03	1703.38	1703.4	1416.19	1195.25	895.176	1707.2	1560.65	1246.49	42.22	34.98	26.14	51.11	46.02	36.4	1336.85	0.364174	0.143036	2.54603	0.0108957	0.110369
ENSG00000170264.12	FAM161A	protein_coding	family with sequence similarity 161 member A [Source:HGNC Symbol;Acc:HGNC:25808]	2977.58	2817.68	3355.05	3077.74	3302.36	3178.65	163.621	188.992	157.887	122.778	112.881	125.57	2.66	3.01	2.51	2.01	1.81	1.99	145.274	-0.489747	0.192372	-2.54583	0.0109018	0.110369
ENSG00000221944.6	TIGD1	protein_coding	tigger transposable element derived 1 [Source:HGNC Symbol;Acc:HGNC:14523]	2446.54	2439.37	2442.72	2443.74	2443.2	2442.97	278.271	292.762	306.543	233.073	240.86	202.571	5.76	5.95	6.21	4.85	4.93	4.11	259.015	-0.381615	0.149924	-2.54538	0.0109159	0.110369
ENSG00000198648.10	STK39	protein_coding	serine/threonine kinase 39 [Source:HGNC Symbol;Acc:HGNC:17717]	3271.56	3185.67	3195.15	3306.97	3106.22	3280.65	1157.16	1326.51	1371.94	1042.04	1150.73	1082.68	18.15	20.42	21.07	16.41	17.85	16.64	1188.51	-0.236479	0.0929679	-2.54366	0.0109697	0.110828
ENSG00000204560.9	DHX16	protein_coding	DEAH-box helicase 16 [Source:HGNC Symbol;Acc:HGNC:2739]	2603.26	2367.26	2476.94	2486.18	2399.3	2604.4	2319.02	2492.25	2370.72	2640.45	2762.79	2681.7	47.13	49.72	47.18	53.86	55.52	53.4	2544.49	0.171066	0.0672803	2.54259	0.0110033	0.111082
ENSG00000080854.14	IGSF9B	protein_coding	immunoglobulin superfamily member 9B [Source:HGNC Symbol;Acc:HGNC:32326]	2136.72	1189.57	1419.78	2356.16	1816.46	2648.45	54.2327	74.2543	60.485	32.1631	42.6284	31.4853	1.47	2	1.61	0.87	1.15	0.84	49.2426	-0.838914	0.330179	-2.54078	0.0110605	0.111402
ENSG00000178538.9	CA8	protein_coding	carbonic anhydrase 8 [Source:HGNC Symbol;Acc:HGNC:1382]	1978.19	2307.22	2301.82	1985.94	2079.2	2275.2	165.179	156.239	178.228	112.808	119.652	124.25	3.89	3.61	4.1	2.66	2.78	2.86	142.737	-0.486897	0.191623	-2.54091	0.0110564	0.111402
ENSG00000261487.1	AC135048.1	processed_transcript		447.6	440.44	443.79	489.039	444.26	484.049	17.5805	29.439	34.0856	55.3102	52.6885	49.4348	1.93	3.14	3.72	6.1	5.81	5.37	39.7529	0.954647	0.375715	2.54088	0.0110574	0.111402
ENSG00000143341.11	HMCN1	protein_coding	hemicentin 1 [Source:HGNC Symbol;Acc:HGNC:19194]	7173.54	7524.88	9276.68	6541.6	6850.45	7039.1	1110.91	1099.28	860.357	933.401	745.225	798.524	7.64	7.43	5.79	6.45	5.07	5.38	924.658	-0.306585	0.120679	-2.5405	0.0110693	0.111406
ENSG00000101040.19	ZMYND8	protein_coding	zinc finger MYND-type containing 8 [Source:HGNC Symbol;Acc:HGNC:9397]	4797.36	4856.25	4773.91	4772.33	4753.07	4646.02	5356.27	5249.6	5160.64	5802.5	5771.09	5818.27	56.83	54.66	53.62	61.79	60.54	60.47	5526.38	0.141542	0.0557973	2.53672	0.0111898	0.112532
ENSG00000116675.15	DNAJC6	protein_coding	DnaJ heat shock protein family (Hsp40) member C6 [Source:HGNC Symbol;Acc:HGNC:15469]	3977.18	4475.71	4462.13	3901.83	4537.38	4101.38	391.121	361.269	388.886	509.556	401.89	529.621	4.67	4.24	4.55	6.11	4.74	6.19	430.391	0.339089	0.133732	2.53558	0.0112262	0.112725
ENSG00000129347.19	KRI1	protein_coding	KRI1 homolog [Source:HGNC Symbol;Acc:HGNC:25769]	2244.58	2142.49	2194.94	2394	2292.76	2411.06	1545.28	1494.9	1403.48	1290.07	1330.22	1239.28	34.29	32.57	30.52	28.75	29.19	26.96	1383.87	-0.204412	0.0806117	-2.53576	0.0112204	0.112725
ENSG00000187790.10	FANCM	protein_coding	Fanconi anemia complementation group M [Source:HGNC Symbol;Acc:HGNC:23168]	4577.04	4135.39	4053.97	4899.55	5088.86	4555.09	485.123	616.464	598.115	468.513	431.841	463.652	5.41	6.75	6.53	5.25	4.76	5.06	510.632	-0.314525	0.124075	-2.53496	0.0112459	0.112837
ENSG00000112812.15	PRSS16	protein_coding	protease, serine 16 [Source:HGNC Symbol;Acc:HGNC:9480]	1378.38	1263.79	1512.37	1315.42	1231.71	1395.3	137.861	143.635	128.703	236.417	205.925	148.955	5.19	5.29	4.74	8.92	7.64	5.49	166.906	0.522356	0.206117	2.53427	0.0112682	0.112974
ENSG00000105048.16	TNNT1	protein_coding	troponin T1, slow skeletal type [Source:HGNC Symbol;Acc:HGNC:11948]	712.281	700.519	713.83	705.294	692.077	703.792	479.714	483.19	417.509	409.997	372.637	279.657	34.43	34.03	29.34	29.54	26.44	19.66	407.123	-0.382465	0.151083	-2.53148	0.0113581	0.113789
ENSG00000144895.11	EIF2A	protein_coding	eukaryotic translation initiation factor 2A [Source:HGNC Symbol;Acc:HGNC:3254]	1535.9	1507.43	1505.82	1485.05	1762.51	1655.78	2965.73	3202.63	3276.24	3035.96	2476.51	2637.86	95.38	101.08	103.18	98.01	78.76	83.1	2932.5	-0.212875	0.0841169	-2.53071	0.0113832	0.113953
ENSG00000013275.7	PSMC4	protein_coding	proteasome 26S subunit, ATPase 4 [Source:HGNC Symbol;Acc:HGNC:9551]	1342.33	1358.84	1368.89	1328.44	1346.11	1349.41	4545.16	4116.59	4393.69	4909.23	4721.04	4980.62	170.38	151.45	161.27	184.73	174.99	182.89	4611.04	0.162313	0.0641934	2.5285	0.0114551	0.114586
ENSG00000265681.7	RPL17	protein_coding	ribosomal protein L17 [Source:HGNC Symbol;Acc:HGNC:10307]	522.085	521.159	525.159	521.618	524.787	521.888	14481.7	15194.3	14948.7	13306.5	13659.7	13729.8	1400.82	1442.41	1415.83	1291.96	1306.42	1300.9	14220.1	-0.132953	0.0526209	-2.52661	0.0115169	0.115116
ENSG00000070814.17	TCOF1	protein_coding	treacle ribosome biogenesis factor 1 [Source:HGNC Symbol;Acc:HGNC:11654]	4059.21	4252.67	4158.97	4286.7	4208.66	4084.72	3627.68	3147.34	3362.35	2871.8	2995.01	3060	43.95	37.42	39.88	34.92	35.88	36.31	3177.36	-0.183779	0.0727485	-2.52623	0.0115294	0.115154
ENSG00000131759.17	RARA	protein_coding	retinoic acid receptor alpha [Source:HGNC Symbol;Acc:HGNC:9864]	2126.16	2243.46	2169.45	2017.74	2110.55	2115.55	2083.2	1931.43	2006.13	2176.92	2317.54	2330.73	49.47	45.01	46.65	51.89	54.41	54.23	2140.98	0.1806	0.0715169	2.52527	0.0115608	0.11538
ENSG00000230487.7	PSMG3-AS1	lincRNA	PSMG3 antisense RNA 1 (head to head) [Source:HGNC Symbol;Acc:HGNC:22230]	2803.68	2207.82	2261.54	2351.64	2847.58	2612	504.469	667.459	573.799	746.179	652.451	750.856	10.2	13.25	11.36	15.15	13.04	14.86	649.217	0.306811	0.121591	2.5233	0.0116258	0.11594
ENSG00000088930.7	XRN2	protein_coding	5'-3' exoribonuclease 2 [Source:HGNC Symbol;Acc:HGNC:12836]	3258.54	3251.37	3254.72	3255.74	3255.2	3254.97	3698.33	4017.7	4140.24	3551.11	3451.48	3543.32	57.45	61.25	62.97	55.37	53.01	53.92	3733.7	-0.168768	0.0668964	-2.52282	0.0116417	0.116011
ENSG00000088826.17	SMOX	protein_coding	spermine oxidase [Source:HGNC Symbol;Acc:HGNC:15862]	2009.48	1997.87	1894.72	1924.2	1897.16	1787.84	312.466	300.069	329.344	352.16	412.018	427.408	8.25	7.77	8.51	9.33	10.74	11.04	355.569	0.338034	0.134084	2.52106	0.0117001	0.116416
ENSG00000106355.9	LSM5	protein_coding	LSM5 homolog, U6 small nuclear RNA and mRNA degradation associated [Source:HGNC Symbol;Acc:HGNC:17162]	587.15	596.818	580.217	589.816	586.573	578.097	1675.31	1778.98	1853.61	1518.92	1582.05	1547.69	144.48	150.54	156.5	131.47	134.9	130.74	1659.42	-0.191904	0.0761586	-2.51979	0.0117426	0.116416
ENSG00000148019.12	CEP78	protein_coding	centrosomal protein 78 [Source:HGNC Symbol;Acc:HGNC:25740]	2852.43	2806.72	2742.15	2830.02	2771.59	2944.53	1269.18	1312.05	1446.27	1201.72	1170.85	1087.22	22.72	23.07	25.36	21.58	20.73	19.07	1247.89	-0.222017	0.0881024	-2.51998	0.011736	0.116416
ENSG00000148120.16	C9orf3	protein_coding	chromosome 9 open reading frame 3 [Source:HGNC Symbol;Acc:HGNC:1361]	1119.29	1148.24	1189.71	1114.36	1069.75	1035.44	438.512	508.97	490.186	521.948	595.71	662.941	19.93	22.72	21.83	23.84	26.8	29.54	536.387	0.311654	0.123671	2.52002	0.0117347	0.116416
ENSG00000148358.19	GPR107	protein_coding	G protein-coupled receptor 107 [Source:HGNC Symbol;Acc:HGNC:17830]	6601	6763.11	6657.7	6620.98	6666.96	6768.74	4089.56	4270.07	4324.85	4619.33	4781.95	4682.07	30.96	31.73	32.06	35.09	35.79	34.72	4461.28	0.150418	0.0596659	2.52101	0.0117019	0.116416
ENSG00000168028.13	RPSA	protein_coding	ribosomal protein SA [Source:HGNC Symbol;Acc:HGNC:6502]	967.568	944.43	951.224	961.267	958.373	959.596	25218.7	27426.9	28719.4	22425	24553.7	25262.7	1332.46	1422.26	1485.86	1189.34	1282.8	1307.52	25601.1	-0.171637	0.068117	-2.51973	0.0117445	0.116416
ENSG00000198830.10	HMGN2	protein_coding	high mobility group nucleosomal binding domain 2 [Source:HGNC Symbol;Acc:HGNC:4986]	931.734	933.293	942.633	939.446	931.352	931.193	23528.1	23429.7	24563.6	22467	21367.3	21281.3	1272.55	1243.72	1300.9	1219.77	1142.77	1127.55	22772.8	-0.135526	0.053764	-2.52075	0.0117106	0.116416
ENSG00000168282.5	MGAT2	protein_coding	mannosyl (alpha-1,6-)-glycoprotein beta-1,2-N-acetylglucosaminyltransferase [Source:HGNC Symbol;Acc:HGNC:7045]	2508.54	2501.37	2504.72	2505.74	2505.2	2504.97	1390.5	1160.79	1094.79	1488.67	1410.18	1426.17	28.06	22.99	21.64	30.16	28.15	28.2	1328.51	0.246269	0.0977572	2.51919	0.0117626	0.116508
ENSG00000164919.10	COX6C	protein_coding	cytochrome c oxidase subunit 6C [Source:HGNC Symbol;Acc:HGNC:2285]	368.436	359.5	356.9	358.676	359.628	368.12	20112.9	24696.6	21223.6	26113.4	29822.2	22283.4	2810.73	3387.24	2904.17	3663.11	4120.83	3050.42	24042.1	0.244129	0.0969504	2.51808	0.0117996	0.116787
ENSG00000005884.17	ITGA3	protein_coding	integrin subunit alpha 3 [Source:HGNC Symbol;Acc:HGNC:6139]	2993.43	3087.01	3147.58	3328.76	2845.8	3063.92	2512.52	2358.21	2193.94	2432.92	2975.69	2830.68	41.33	38.08	35.34	40.17	48.38	45.63	2550.64	0.221006	0.0877933	2.51734	0.0118243	0.116943
ENSG00000123473.15	STIL	protein_coding	STIL, centriolar assembly protein [Source:HGNC Symbol;Acc:HGNC:10879]	4290.92	4464.19	4491.89	4707.35	4174.47	4749.84	1241.74	1306.12	1316.86	1158.19	1148.26	1025.01	14.04	14.49	14.58	13.14	12.83	11.34	1199.39	-0.217639	0.086479	-2.51667	0.0118471	0.117081
ENSG00000167522.14	ANKRD11	protein_coding	ankyrin repeat domain 11 [Source:HGNC Symbol;Acc:HGNC:21316]	4982.62	5260.47	5708.78	5066.54	5240.96	5243.78	6652.35	6111.16	5347.2	5513.85	5060.13	5147.54	64.12	57.83	50.47	53.36	48.22	48.6	5638.75	-0.203803	0.0810474	-2.51462	0.0119162	0.117675
ENSG00000065000.15	AP3D1	protein_coding	adaptor related protein complex 3 delta 1 subunit [Source:HGNC Symbol;Acc:HGNC:568]	4447.6	4480.52	4463.53	4402.15	4400.92	4468.48	4483.7	4201.55	4356.66	4667.73	5047.75	4839.45	51.02	46.92	48.55	53.32	56.8	53.95	4599.46	0.157573	0.0626993	2.51315	0.0119658	0.117987
ENSG00000157216.15	SSBP3	protein_coding	single stranded DNA binding protein 3 [Source:HGNC Symbol;Acc:HGNC:15674]	2050.89	1975.27	2076.15	1959.78	1956.55	1973.84	1036.65	892.862	1001.05	1157.86	1147.54	1126.19	26.25	22.17	24.8	29.42	28.72	27.91	1060.35	0.225006	0.0895304	2.51317	0.011965	0.117987
ENSG00000118705.16	RPN2	protein_coding	ribophorin II [Source:HGNC Symbol;Acc:HGNC:10382]	2169.3	2130.15	2151.96	2129.49	2169.27	2173.81	10441.4	11026.9	10690.8	9521.49	10021	9659.07	245.13	254.07	245.76	224.38	232.63	222.13	10226.8	-0.139336	0.0554636	-2.51221	0.0119979	0.118119
ENSG00000143570.17	SLC39A1	protein_coding	solute carrier family 39 member 1 [Source:HGNC Symbol;Acc:HGNC:12876]	1927.6	1933.34	1930.2	1929.71	1935.91	1929.93	3554.01	3522.99	3598.7	3880.16	3981.3	3975.26	93.05	90.54	92.27	101.99	103.09	101.96	3752.06	0.148617	0.0591697	2.5117	0.0120151	0.118119
ENSG00000176532.3	PRR15	protein_coding	proline rich 15 [Source:HGNC Symbol;Acc:HGNC:22310]	1290.34	1241.95	1283.46	1198.99	1291.52	1386.43	214.647	196.308	184.679	293.814	288.262	221.848	8.47	7.61	7.14	11.64	11.25	8.58	233.258	0.425264	0.169301	2.51188	0.012009	0.118119
ENSG00000196305.17	IARS	protein_coding	isoleucyl-tRNA synthetase [Source:HGNC Symbol;Acc:HGNC:5330]	3851.44	3655.46	3916.87	3629.99	3857.65	3891.1	8365.01	9047.17	8820.52	8084.74	7636.46	7945.92	111.35	118.2	114.97	108.02	100.53	103.61	8316.64	-0.148121	0.0589701	-2.5118	0.0120116	0.118119
ENSG00000074054.17	CLASP1	protein_coding	cytoplasmic linker associated protein 1 [Source:HGNC Symbol;Acc:HGNC:17088]	4423.45	4827.94	4985.03	4521.3	4831.2	4423.54	1736.97	1551.89	1608.31	1451.68	1350.9	1450.07	18.82	16.51	17.07	15.8	14.48	15.41	1524.96	-0.202453	0.0806186	-2.51125	0.0120306	0.118182
ENSG00000070010.18	UFD1	protein_coding	ubiquitin recognition factor in ER associated degradation 1 [Source:HGNC Symbol;Acc:HGNC:12520]	990.242	1041.51	1001	1045.44	968.444	973.272	1786.75	1680.08	1781.98	1840.65	2026.11	2201.66	90.09	83.13	87.97	93.16	101.02	108.77	1886.22	0.209825	0.0835763	2.51059	0.0120531	0.118315
ENSG00000188215.9	DCUN1D3	protein_coding	defective in cullin neddylation 1 domain containing 3 [Source:HGNC Symbol;Acc:HGNC:28734]	3989.45	4329.93	4298.03	4027.93	3758.99	3740.62	260.581	270.175	264.872	330.048	339.416	335.108	3.28	3.34	3.27	4.17	4.22	4.13	300.025	0.33556	0.133687	2.51004	0.0120716	0.118408
ENSG00000143153.12	ATP1B1	protein_coding	ATPase Na+/K+ transporting subunit beta 1 [Source:HGNC Symbol;Acc:HGNC:804]	2206.94	2275.8	2229.63	2228.34	2251.78	2189.25	2267.35	2482.55	2531	2669.75	2757.36	2815.57	51.42	55.26	56.2	60.77	61.81	62.54	2587.25	0.179174	0.0714284	2.50845	0.0121263	0.118725
ENSG00000172831.11	CES2	protein_coding	carboxylesterase 2 [Source:HGNC Symbol;Acc:HGNC:1864]	3175.17	3516.66	3360.27	3286.35	3397.84	3145.01	1224.64	1112.64	1116.05	1266.45	1340.14	1396.49	18.7	16.67	16.68	19.41	20.23	20.9	1242.74	0.213939	0.0852889	2.5084	0.0121278	0.118725
ENSG00000186567.12	CEACAM19	protein_coding	carcinoembryonic antigen related cell adhesion molecule 19 [Source:HGNC Symbol;Acc:HGNC:31951]	1577.51	1630.36	1720.47	1763.44	1707.49	1410.77	35.5376	30.5956	22.7064	51.658	48.8319	63.2514	1.1	0.93	0.69	1.61	1.5	1.92	42.1085	0.896435	0.357424	2.50805	0.0121401	0.118725
ENSG00000278540.4	ACACA	protein_coding	acetyl-CoA carboxylase alpha [Source:HGNC Symbol;Acc:HGNC:84]	3978	4948.48	4423.64	4072.53	3976.72	4169.37	2990.58	2164.31	2629.38	3147.1	2924.07	3192.59	35.61	25.29	30.64	37.58	34.41	37.25	2841.34	0.251404	0.100229	2.5083	0.0121313	0.118725
ENSG00000121897.14	LIAS	protein_coding	lipoic acid synthetase [Source:HGNC Symbol;Acc:HGNC:16429]	1192.55	1081.17	1119.47	1127.48	1321.62	1168.35	192.843	274.925	222.001	166.658	166.207	168.732	8.35	11.7	9.41	7.26	7.13	7.16	198.575	-0.452919	0.180663	-2.50697	0.012177	0.118997
[truncated: 14,567 more rows]
