# Supplementary material
Source: Preprints.org preprint supplement (doi:10.20944/preprints202004.0323.v1)
Supplement: Supplementary file 1 [file supplementary › Supplementary_Table_3_GO_enrichment_analysis_metascape_results.xlsx]

## Sheet: Annotation_upregulated_genes
Input ID	Gene ID	Type	Tax ID	Homologene Gene ID	Homologene Gene Tax ID	GO:0034340 response to type I interferon	GO:0060333 interferon-gamma-mediated sign	GO:0045088 regulation of innate immune re	GO:0097190 apoptotic signaling pathway	GO:0019882 antigen processing and present	GO:0046718 viral entry into host cell	GO:0002274 myeloid leukocyte activation	GO:0007249 I-kappaB kinase/NF-kappaB sign	GO:0051091 positive regulation of DNA-bin	GO:0016126 sterol biosynthetic process	GO:0035456 response to interferon-beta	GO:0032606 type I interferon production	GO:0051603 proteolysis involved in cellul	GO:0002683 negative regulation of immune	GO:0006914 autophagy	GO:0097193 intrinsic apoptotic signaling	GO:0051259 protein complex oligomerizatio	GO:0060700 regulation of ribonuclease act	GO:0006986 response to unfolded protein	GO:0097191 extrinsic apoptotic signaling
ALDH3B2	222	symbol	H. sapiens	222	H. sapiens	0	0	0	0	0	0	0	0	0	1	0	0	0	0	0	0	0	0	0	0
BASP1	10409	symbol	H. sapiens	10409	H. sapiens	0	0	0	0	0	0	0	0	0	0	0	0	0	0	0	0	0	0	0	0
QPRT	23475	symbol	H. sapiens	23475	H. sapiens	0	0	0	0	0	0	0	0	0	0	0	0	0	0	0	0	1	0	0	0
S100A14	57402	symbol	H. sapiens	57402	H. sapiens	1	0	1	0	0	0	0	0	0	0	0	0	0	0	0	0	0	0	0	0
CTSS	1520	symbol	H. sapiens	1520	H. sapiens	0	0	1	0	1	0	1	0	0	0	0	0	1	0	0	0	0	0	0	0
SPTSSB	165679	symbol	H. sapiens	165679	H. sapiens	0	0	0	0	0	0	0	0	0	1	0	0	0	0	0	0	0	0	0	0
HLA-C	3107	symbol	H. sapiens	3107	H. sapiens	1	1	0	0	1	0	0	0	0	0	0	0	0	0	0	0	0	0	0	0
MUC1	4582	symbol	H. sapiens	4582	H. sapiens	1	0	1	1	0	0	0	0	0	0	0	0	0	0	0	1	0	0	0	0
FAM83A	84985	symbol	H. sapiens	84985	H. sapiens	0	0	0	0	0	0	0	0	0	0	0	0	0	0	0	0	0	0	0	0
TFF1	7031	symbol	H. sapiens	7031	H. sapiens	0	0	0	0	0	0	0	0	0	0	0	0	0	0	0	0	0	0	0	0
CSTA	1475	symbol	H. sapiens	1475	H. sapiens	0	0	0	1	0	0	0	0	0	0	0	0	0	0	0	0	0	0	0	0
S100A16	140576	symbol	H. sapiens	140576	H. sapiens	0	0	0	0	0	0	0	0	0	0	0	0	0	0	0	0	0	0	0	0
TAP1	6890	symbol	H. sapiens	6890	H. sapiens	0	0	0	0	1	0	0	0	0	0	0	0	0	0	0	0	0	0	0	0
SQSTM1	8878	symbol	H. sapiens	8878	H. sapiens	1	0	0	1	0	0	0	1	0	0	0	0	1	0	1	0	1	0	0	0
SLC6A14	11254	symbol	H. sapiens	11254	H. sapiens	0	0	0	0	0	0	0	0	0	0	0	0	0	0	0	0	0	0	0	0
MVP	9961	symbol	H. sapiens	9961	H. sapiens	0	0	0	0	0	0	1	0	0	0	0	0	0	0	0	0	0	0	0	0
ABCA12	26154	symbol	H. sapiens	26154	H. sapiens	0	0	0	0	0	0	1	0	0	0	0	0	0	0	0	0	0	0	0	0
REEP5	7905	symbol	H. sapiens	7905	H. sapiens	0	0	0	0	0	0	0	0	0	0	0	0	0	0	0	0	0	0	0	0
RAPH1	65059	symbol	H. sapiens	65059	H. sapiens	0	0	0	0	0	0	0	0	0	0	0	0	0	0	0	0	0	0	0	0
HIST2H2AA4	723790	gene_synonym	H. sapiens	723790	H. sapiens	0	0	0	0	0	0	0	0	0	0	0	0	0	0	0	0	0	0	0	0
IFI35	3430	symbol	H. sapiens	3430	H. sapiens	1	0	0	0	0	0	0	0	0	0	0	0	0	0	0	0	0	0	0	0
SIAH2	6478	symbol	H. sapiens	6478	H. sapiens	0	0	0	1	0	0	0	0	0	0	0	0	1	0	0	1	0	0	0	1
S100A9	6280	symbol	H. sapiens	6280	H. sapiens	1	0	1	1	0	0	1	0	1	0	0	0	0	0	1	1	0	0	0	0
HLA-A	3105	symbol	H. sapiens	3105	H. sapiens	1	1	0	0	1	0	0	0	0	0	0	0	0	0	0	0	0	0	0	0
SLC41A1	254428	symbol	H. sapiens	254428	H. sapiens	0	0	0	0	0	0	0	0	0	0	0	0	0	0	0	0	0	0	0	0
ISG15	9636	symbol	H. sapiens	9636	H. sapiens	1	0	1	0	0	0	0	0	0	0	0	1	1	0	0	0	0	0	0	0
MBOAT7	79143	symbol	H. sapiens	79143	H. sapiens	0	0	0	0	0	0	0	0	0	1	0	0	0	0	0	0	0	0	0	0
AC068580.4						nan	nan	nan	nan	nan	nan	nan	nan	nan	nan	nan	nan	nan	nan	nan	nan	nan	nan	nan	nan
CAB39L	81617	symbol	H. sapiens	81617	H. sapiens	0	0	0	0	0	0	0	0	0	0	0	0	0	0	0	0	0	0	0	0
OPTN	10133	symbol	H. sapiens	10133	H. sapiens	1	0	1	0	0	0	0	1	0	0	0	0	0	0	1	0	0	0	1	0
OAS1	4938	symbol	H. sapiens	4938	H. sapiens	1	1	0	0	0	0	0	0	0	0	0	0	0	0	0	0	0	1	0	0
USP18	11274	symbol	H. sapiens	11274	H. sapiens	1	0	1	0	0	0	0	0	0	0	0	0	1	0	0	0	0	0	0	0
LGALS3BP	3959	symbol	H. sapiens	3959	H. sapiens	0	0	0	0	0	0	1	0	0	0	0	0	0	0	0	0	0	0	0	0
TRANK1	9881	symbol	H. sapiens	9881	H. sapiens	0	0	0	0	0	0	0	0	0	0	0	0	0	0	0	0	0	0	0	0
IFI6	2537	symbol	H. sapiens	2537	H. sapiens	1	0	0	1	0	0	0	0	0	0	0	0	0	0	0	1	0	0	0	1
MX1	4599	symbol	H. sapiens	4599	H. sapiens	1	0	0	0	0	0	0	0	0	0	0	0	0	0	0	0	0	0	0	0
FBP1	2203	symbol	H. sapiens	2203	H. sapiens	0	0	0	0	0	0	0	0	0	1	0	0	0	0	0	0	1	0	0	0
UBE2L6	9246	symbol	H. sapiens	9246	H. sapiens	0	0	1	0	0	0	0	0	0	0	0	1	1	0	0	0	0	0	0	0
TAPBP	6892	symbol	H. sapiens	6892	H. sapiens	0	0	0	0	1	0	0	0	0	0	0	0	0	0	0	0	0	0	0	0
CMPK2	129607	symbol	H. sapiens	129607	H. sapiens	0	0	0	0	0	0	0	0	0	0	0	0	0	0	0	0	0	0	0	0
LSS	4047	symbol	H. sapiens	4047	H. sapiens	0	0	0	0	0	0	0	0	0	1	0	0	0	0	0	0	0	0	0	0
OAS2	4939	symbol	H. sapiens	4939	H. sapiens	1	1	0	0	0	0	0	0	0	0	0	0	0	0	0	0	0	1	0	0
HIST1H1C	3006	gene_synonym	H. sapiens	3006	H. sapiens	0	0	0	0	0	0	0	0	0	0	0	0	0	0	0	0	0	0	0	0
S100A6	6277	symbol	H. sapiens	6277	H. sapiens	0	0	0	0	0	0	0	0	0	0	0	0	0	0	0	0	0	0	0	0
PRAL	109245082	symbol	H. sapiens	109245082	H. sapiens	0	0	0	0	0	0	0	0	0	0	0	0	0	0	0	0	0	0	0	0
IFITM10	402778	symbol	H. sapiens	402778	H. sapiens	0	0	0	0	0	0	0	0	0	0	0	0	0	0	0	0	0	0	0	0
SELENBP1	8991	symbol	H. sapiens	8991	H. sapiens	0	0	0	0	0	0	0	0	0	0	0	0	0	0	0	0	0	0	0	0
IRF1	3659	symbol	H. sapiens	3659	H. sapiens	1	1	1	0	1	0	0	0	0	0	1	1	0	1	0	0	0	0	0	0
RDH11	51109	symbol	H. sapiens	51109	H. sapiens	0	0	0	0	0	0	0	0	0	1	0	0	0	0	0	0	0	0	0	0
SAMHD1	25939	symbol	H. sapiens	25939	H. sapiens	1	0	1	0	0	0	0	0	0	0	0	0	0	1	0	0	1	0	0	0
LCN2	3934	symbol	H. sapiens	3934	H. sapiens	1	0	0	1	0	0	1	0	0	0	0	0	0	0	0	0	1	0	0	1
ABCC5	10057	symbol	H. sapiens	10057	H. sapiens	0	0	0	0	0	0	0	0	0	0	0	0	0	0	0	0	0	0	0	0
HCP5	10866	symbol	H. sapiens	10866	H. sapiens	0	0	0	0	0	0	0	0	0	0	0	0	0	0	0	0	0	0	0	0
HIST1H2BC	8347	gene_synonym	H. sapiens	8347	H. sapiens	1	0	0	0	0	0	0	0	0	0	0	0	0	0	0	0	0	0	0	0
APOL1	8542	symbol	H. sapiens	8542	H. sapiens	0	0	0	0	1	0	0	0	0	1	0	0	0	0	0	0	0	0	0	0
STOM	2040	symbol	H. sapiens	2040	H. sapiens	1	0	0	0	0	0	1	0	0	0	0	0	0	0	0	0	1	0	0	0
APOL6	80830	symbol	H. sapiens	80830	H. sapiens	0	0	0	0	0	0	0	0	0	0	0	0	0	0	0	0	0	0	0	0
SCD	6319	symbol	H. sapiens	6319	H. sapiens	0	0	0	0	0	0	0	0	0	1	0	0	0	0	0	0	0	0	0	0
DHCR24	1718	symbol	H. sapiens	1718	H. sapiens	0	0	0	1	0	0	0	0	0	1	0	0	0	0	0	0	0	0	0	0
ISG20	3669	symbol	H. sapiens	3669	H. sapiens	1	0	0	0	0	0	0	0	0	0	0	0	0	0	0	0	0	0	0	0
ALOX15	246	symbol	H. sapiens	246	H. sapiens	1	0	0	0	1	0	0	0	0	1	0	0	0	1	0	0	0	0	1	0
TMEM229B	161145	symbol	H. sapiens	161145	H. sapiens	0	0	0	0	0	0	0	0	0	0	0	0	0	0	0	0	0	0	0	0
TACC2	10579	symbol	H. sapiens	10579	H. sapiens	0	0	0	0	0	0	0	0	0	0	0	0	0	0	0	0	0	0	0	0
FILIP1L	11259	symbol	H. sapiens	11259	H. sapiens	0	0	0	0	0	0	0	0	0	0	0	0	0	0	0	0	0	0	0	0
CFB	629	symbol	H. sapiens	629	H. sapiens	0	0	1	0	0	0	0	0	0	0	0	0	0	0	0	0	0	0	0	0
OAS3	4940	symbol	H. sapiens	4940	H. sapiens	1	1	0	0	0	0	0	0	0	0	0	0	0	0	0	0	0	1	0	0
NEU1	4758	symbol	H. sapiens	4758	H. sapiens	0	0	0	0	0	0	1	0	0	0	0	0	0	0	0	0	0	0	0	0
HELZ2	85441	symbol	H. sapiens	85441	H. sapiens	0	0	0	0	0	0	0	0	0	1	0	0	0	0	0	0	0	0	0	0
TIMP1	7076	symbol	H. sapiens	7076	H. sapiens	1	0	0	1	0	1	1	0	0	0	0	0	1	0	0	0	0	0	0	0
FDFT1	2222	symbol	H. sapiens	2222	H. sapiens	0	0	0	0	0	0	0	0	0	1	0	0	0	0	0	0	0	0	0	0
SCPEP1	59342	symbol	H. sapiens	59342	H. sapiens	0	0	0	0	0	0	0	0	0	0	0	0	1	0	0	0	0	0	0	0
ECH1	1891	symbol	H. sapiens	1891	H. sapiens	0	0	0	0	0	0	0	0	0	0	0	0	0	0	0	0	0	0	0	0
PSMB8	5696	symbol	H. sapiens	5696	H. sapiens	1	0	1	1	1	0	0	0	0	1	0	0	1	0	0	0	0	0	0	0
CRABP2	1382	symbol	H. sapiens	1382	H. sapiens	0	0	0	0	0	0	0	0	0	1	0	0	0	0	0	0	0	0	0	0
PARP14	54625	symbol	H. sapiens	54625	H. sapiens	1	1	1	0	0	0	0	0	0	0	0	0	0	1	0	0	0	0	0	0
ARMCX1	51309	symbol	H. sapiens	51309	H. sapiens	0	0	0	0	0	0	0	0	0	0	0	0	0	0	0	0	0	0	0	0
B2M	567	symbol	H. sapiens	567	H. sapiens	1	1	1	0	1	0	1	0	0	0	0	0	0	0	0	1	1	0	0	0
FAM102B	284611	symbol	H. sapiens	284611	H. sapiens	0	0	0	0	0	0	0	0	0	0	0	0	0	0	0	0	0	0	0	0
PMP22	5376	symbol	H. sapiens	5376	H. sapiens	0	0	0	0	0	0	0	0	0	0	0	0	0	0	0	0	0	0	0	0
UNC13B	10497	symbol	H. sapiens	10497	H. sapiens	1	0	1	1	0	0	1	0	0	0	0	0	0	0	0	0	0	0	0	0
MX2	4600	symbol	H. sapiens	4600	H. sapiens	1	0	0	0	0	0	0	0	0	0	1	0	0	0	0	0	0	0	0	0
ZNFX1	57169	symbol	H. sapiens	57169	H. sapiens	0	0	0	0	0	0	0	0	0	0	0	0	0	0	0	0	0	0	0	0
FTH1	2495	symbol	H. sapiens	2495	H. sapiens	0	0	0	0	0	0	1	0	0	0	0	0	0	0	0	0	0	0	0	0
RHOC	389	symbol	H. sapiens	389	H. sapiens	0	0	0	1	0	0	0	1	0	0	0	0	0	0	0	0	1	0	0	0
VPS18	57617	symbol	H. sapiens	57617	H. sapiens	1	0	0	0	0	1	1	0	0	0	0	0	0	0	1	0	0	0	0	0
SP110	3431	symbol	H. sapiens	3431	H. sapiens	0	0	0	0	0	0	0	0	0	0	0	0	0	0	0	0	0	0	0	0
S100A8	6279	symbol	H. sapiens	6279	H. sapiens	1	0	1	1	0	0	1	0	1	0	0	0	0	0	1	1	0	0	0	0
KIAA1522	57648	symbol	H. sapiens	57648	H. sapiens	0	0	0	0	0	0	0	0	0	0	0	0	0	0	0	0	0	0	0	0
MYOF	26509	symbol	H. sapiens	26509	H. sapiens	0	0	0	0	0	0	0	0	0	1	0	0	0	0	0	0	0	0	0	0
IFIT1	3434	symbol	H. sapiens	3434	H. sapiens	1	0	0	0	0	1	0	0	0	0	0	0	0	0	0	0	0	0	0	0
KMO	8564	symbol	H. sapiens	8564	H. sapiens	0	0	0	1	0	0	0	0	0	0	0	0	0	0	0	0	0	0	0	0
LPIN1	23175	symbol	H. sapiens	23175	H. sapiens	0	0	0	0	0	0	0	0	0	1	0	0	0	0	0	0	0	0	0	0
SALL4	57167	symbol	H. sapiens	57167	H. sapiens	0	0	0	0	0	0	0	0	0	0	0	0	0	0	0	0	0	0	0	0
INSIG1	3638	symbol	H. sapiens	3638	H. sapiens	0	0	0	0	0	0	0	0	0	1	0	0	0	0	0	1	0	0	0	0
IFI27	3429	symbol	H. sapiens	3429	H. sapiens	1	0	0	1	0	0	0	0	0	0	0	0	1	0	0	0	0	0	0	1
BST2	684	symbol	H. sapiens	684	H. sapiens	1	1	1	1	1	1	1	1	0	0	1	0	0	1	0	0	0	0	0	0
ANXA6	309	symbol	H. sapiens	309	H. sapiens	0	0	0	1	0	0	0	0	0	0	0	0	0	0	0	0	1	0	0	0
PLA2G4C	8605	symbol	H. sapiens	8605	H. sapiens	0	0	0	0	0	0	0	0	0	0	0	0	0	0	0	0	0	0	0	0
ABAT	18	symbol	H. sapiens	18	H. sapiens	0	0	0	0	0	0	0	0	0	1	0	0	0	0	0	0	0	0	0	0
PSMB9	5698	symbol	H. sapiens	5698	H. sapiens	1	0	1	1	1	0	0	0	0	1	0	0	1	0	0	0	0	0	0	0
TMEM265	100862671	symbol	H. sapiens	100862671	H. sapiens	0	0	0	0	0	0	0	0	0	0	0	0	0	0	0	0	0	0	0	0
TRIM14	9830	symbol	H. sapiens	9830	H. sapiens	1	0	0	0	0	1	0	0	1	0	0	0	0	0	0	0	0	0	0	0
HIST1H2BK	85236	gene_synonym	H. sapiens	85236	H. sapiens	1	0	0	0	1	0	0	0	0	0	0	0	0	0	0	0	0	0	0	0
NFKB2	4791	symbol	H. sapiens	4791	H. sapiens	0	0	1	0	1	0	0	0	1	0	0	1	0	0	0	0	0	0	0	0
HIST1H2BD	3017	gene_synonym	H. sapiens	3017	H. sapiens	0	0	0	0	0	0	0	0	0	0	0	0	0	0	0	0	0	0	0	0
AL365181.3						nan	nan	nan	nan	nan	nan	nan	nan	nan	nan	nan	nan	nan	nan	nan	nan	nan	nan	nan	nan
HIST1H4H	8365	gene_synonym	H. sapiens	8365	H. sapiens	0	0	0	0	0	0	0	0	0	0	0	0	0	1	0	0	1	0	0	0
HLA-E	3133	symbol	H. sapiens	3133	H. sapiens	1	1	1	0	1	0	1	0	0	0	0	0	0	1	0	0	0	0	0	0
GBP3	2635	symbol	H. sapiens	2635	H. sapiens	1	1	0	0	0	0	0	0	0	0	0	0	0	0	0	0	0	0	0	0
IFIT2	3433	symbol	H. sapiens	3433	H. sapiens	1	0	0	1	0	0	0	0	0	0	1	0	0	0	0	0	0	0	0	0
LDLR	3949	symbol	H. sapiens	3949	H. sapiens	1	0	1	0	0	1	1	0	0	1	0	0	1	1	1	0	0	0	0	0
SLC39A6	25800	symbol	H. sapiens	25800	H. sapiens	0	0	0	0	0	0	0	0	0	0	0	0	0	0	0	0	0	0	0	0
ADIPOR2	79602	symbol	H. sapiens	79602	H. sapiens	1	0	0	0	0	0	0	0	0	1	0	0	0	0	0	0	0	0	0	0
AP003419.2						nan	nan	nan	nan	nan	nan	nan	nan	nan	nan	nan	nan	nan	nan	nan	nan	nan	nan	nan	nan
RBCK1	10616	symbol	H. sapiens	10616	H. sapiens	1	0	1	1	0	0	0	1	1	0	0	0	1	0	0	0	0	0	0	1
HLA-B	3106	symbol	H. sapiens	3106	H. sapiens	1	1	0	0	1	0	0	0	0	0	0	0	0	0	0	0	0	0	0	0
PLSCR1	5359	symbol	H. sapiens	5359	H. sapiens	1	0	1	1	0	0	1	0	0	1	1	0	0	0	0	0	0	0	0	0
KYNU	8942	symbol	H. sapiens	8942	H. sapiens	0	1	0	0	0	0	0	0	0	0	0	0	0	0	0	0	0	0	0	0
APH1B	83464	symbol	H. sapiens	83464	H. sapiens	0	0	0	1	0	0	0	0	0	0	0	0	0	0	0	0	0	0	0	0
EPB41L5	57669	symbol	H. sapiens	57669	H. sapiens	0	0	0	0	0	0	0	0	0	0	0	0	0	0	0	0	0	0	0	0
BAG1	573	symbol	H. sapiens	573	H. sapiens	0	0	0	0	0	0	0	0	0	0	0	0	0	0	0	1	0	0	0	0
DDR1	780	symbol	H. sapiens	780	H. sapiens	0	0	0	0	0	0	0	0	0	0	0	0	0	0	0	0	0	0	0	0
PARP10	84875	symbol	H. sapiens	84875	H. sapiens	1	0	0	0	0	0	0	0	1	0	0	0	1	0	0	0	0	0	0	0
ERBB2	2064	symbol	H. sapiens	2064	H. sapiens	0	0	0	1	0	0	0	0	0	0	0	0	0	1	0	0	0	0	0	0
LGALS9	3965	symbol	H. sapiens	3965	H. sapiens	1	1	1	1	1	1	1	1	1	0	0	0	0	1	0	1	0	0	0	0
BCL9L	283149	symbol	H. sapiens	283149	H. sapiens	0	0	0	0	0	0	0	0	0	0	0	0	0	0	0	0	0	0	0	0
RNF43	54894	symbol	H. sapiens	54894	H. sapiens	0	0	0	0	0	0	0	0	0	0	0	0	1	0	0	0	0	0	0	0
PARP9	83666	symbol	H. sapiens	83666	H. sapiens	1	1	1	0	0	0	0	0	0	0	0	0	0	0	0	1	0	0	0	0
GBP1	2633	symbol	H. sapiens	2633	H. sapiens	1	1	1	0	0	0	0	0	0	0	0	0	0	1	0	0	1	0	0	0
NCAM2	4685	symbol	H. sapiens	4685	H. sapiens	0	0	0	0	0	0	0	0	0	0	0	0	0	0	0	0	0	0	0	0
GPER1	2852	symbol	H. sapiens	2852	H. sapiens	0	0	0	1	0	0	0	0	0	1	0	0	0	1	0	0	0	0	0	1
EEF1A2	1917	symbol	H. sapiens	1917	H. sapiens	0	0	0	1	0	0	0	0	0	1	0	0	1	0	1	0	0	0	0	0
FMO5	2330	symbol	H. sapiens	2330	H. sapiens	0	0	0	0	0	0	0	0	0	0	0	0	0	0	0	0	0	0	0	0
ATP6AP1	537	symbol	H. sapiens	537	H. sapiens	0	0	0	0	0	0	0	0	0	0	0	0	0	0	0	0	0	0	0	0
STAT1	6772	symbol	H. sapiens	6772	H. sapiens	1	1	1	0	0	0	0	1	0	0	1	1	0	0	0	0	0	0	0	0
TRIM25	7706	symbol	H. sapiens	7706	H. sapiens	1	1	1	0	0	1	0	1	1	0	0	1	1	0	0	0	0	0	1	0
APOL2	23780	symbol	H. sapiens	23780	H. sapiens	0	0	0	0	0	0	0	0	0	1	0	0	0	0	0	0	0	0	0	0
COMT	1312	symbol	H. sapiens	1312	H. sapiens	0	0	0	0	0	0	0	0	0	1	0	0	0	0	0	0	0	0	0	0
KCNK2	3776	symbol	H. sapiens	3776	H. sapiens	0	0	0	1	0	0	0	0	0	0	0	0	0	0	0	1	0	0	0	0
UNC13D	201294	symbol	H. sapiens	201294	H. sapiens	1	0	0	0	1	0	1	0	0	0	0	0	0	0	0	0	0	0	0	0
PIM3	415116	symbol	H. sapiens	415116	H. sapiens	0	0	0	0	0	0	0	0	0	0	0	0	0	0	0	0	0	0	0	0
SGMS1-AS1	104355295	symbol	H. sapiens	104355295	H. sapiens	0	0	0	0	0	0	0	0	0	0	0	0	0	0	0	0	0	0	0	0
DRAM1	55332	symbol	H. sapiens	55332	H. sapiens	0	0	0	0	0	0	0	0	0	0	0	0	0	0	1	0	0	0	0	0
S100A13	6284	symbol	H. sapiens	6284	H. sapiens	0	0	1	0	0	0	1	1	0	0	0	0	0	0	0	0	0	0	0	0
SCARB2	950	symbol	H. sapiens	950	H. sapiens	1	0	0	0	0	1	0	0	0	0	0	0	0	0	0	0	0	0	0	0
MYO6	4646	symbol	H. sapiens	4646	H. sapiens	0	0	0	0	0	0	0	0	0	0	0	0	0	0	0	0	0	0	0	0
TNKS1BP1	85456	symbol	H. sapiens	85456	H. sapiens	0	0	0	0	0	0	0	0	0	0	0	0	0	0	0	0	0	0	0	0
STAT2	6773	symbol	H. sapiens	6773	H. sapiens	1	0	0	0	0	0	0	0	0	0	0	0	0	0	0	0	0	0	0	0
SULT1A1	6817	symbol	H. sapiens	6817	H. sapiens	0	0	0	0	0	0	0	0	0	1	0	0	0	0	0	0	0	0	0	0
NEDD4L	23327	symbol	H. sapiens	23327	H. sapiens	1	0	0	0	0	0	0	0	0	0	0	0	1	0	1	0	0	0	0	0
ATP6V1A	523	symbol	H. sapiens	523	H. sapiens	0	0	0	0	0	0	0	0	0	0	0	0	0	0	1	0	0	0	0	0
DDIT3	1649	symbol	H. sapiens	1649	H. sapiens	0	0	1	1	0	0	0	0	1	0	0	0	1	0	1	1	1	0	1	0
ASCL1	429	symbol	H. sapiens	429	H. sapiens	0	0	0	1	0	0	0	0	0	0	0	0	0	0	0	0	0	0	0	0
CDC42SE1	56882	symbol	H. sapiens	56882	H. sapiens	0	0	0	0	0	0	0	0	0	0	0	0	0	0	0	0	0	0	0	0
DDX60L	91351	symbol	H. sapiens	91351	H. sapiens	0	0	0	0	0	0	0	0	0	0	0	0	0	0	0	0	0	0	0	0
IFITM1	8519	symbol	H. sapiens	8519	H. sapiens	1	1	0	0	0	1	0	0	0	0	1	0	0	0	0	0	0	0	0	0
CSTB	1476	symbol	H. sapiens	1476	H. sapiens	0	0	0	1	0	0	1	0	0	0	0	0	0	0	0	0	0	0	0	0
SLC2A6	11182	symbol	H. sapiens	11182	H. sapiens	0	0	0	0	0	0	0	0	0	1	0	0	0	0	0	0	0	0	0	0
TRIM56	81844	symbol	H. sapiens	81844	H. sapiens	1	0	1	0	0	0	0	0	0	0	0	1	1	0	0	0	0	0	0	0
IFITM3	10410	symbol	H. sapiens	10410	H. sapiens	1	1	0	0	0	1	0	0	0	0	1	0	0	0	0	0	0	0	0	0
SHISA5	51246	symbol	H. sapiens	51246	H. sapiens	0	0	0	1	0	0	0	1	0	0	0	0	0	0	0	1	0	0	0	0
ERAP1	51752	symbol	H. sapiens	51752	H. sapiens	0	0	1	0	1	0	0	0	0	0	0	0	0	0	0	0	0	0	0	0
MGST1	4257	symbol	H. sapiens	4257	H. sapiens	0	0	0	0	0	0	1	0	0	1	0	0	0	0	0	0	1	0	0	0
SREBF1	6720	symbol	H. sapiens	6720	H. sapiens	0	0	0	0	0	0	0	0	0	1	0	0	0	0	1	0	0	0	0	0
APOL3	80833	symbol	H. sapiens	80833	H. sapiens	0	0	0	0	0	0	0	1	0	0	0	0	0	0	0	0	0	0	0	0
USP47	55031	symbol	H. sapiens	55031	H. sapiens	0	0	0	1	0	0	0	0	0	0	0	0	1	0	0	1	0	0	0	0
FAM50A	9130	symbol	H. sapiens	9130	H. sapiens	0	0	0	0	0	0	0	0	0	0	0	0	0	0	0	0	0	0	0	0
GDNF	2668	symbol	H. sapiens	2668	H. sapiens	0	0	0	1	0	0	0	0	0	0	0	0	0	0	0	1	0	0	0	1
ABCD1	215	symbol	H. sapiens	215	H. sapiens	0	0	1	0	0	0	0	0	0	1	0	0	0	1	1	1	0	0	0	0
NFKBIA	4792	symbol	H. sapiens	4792	H. sapiens	1	0	1	0	0	0	0	1	1	0	0	0	0	1	0	0	0	0	0	0
NPIPB13	613037	symbol	H. sapiens	613037	H. sapiens	0	0	0	0	0	0	0	0	0	0	0	0	0	0	0	0	0	0	0	0
POF1B	79983	symbol	H. sapiens	79983	H. sapiens	0	0	0	0	0	0	0	0	0	0	0	0	0	0	0	0	0	0	0	0
P4HTM	54681	symbol	H. sapiens	54681	H. sapiens	0	0	0	0	0	0	0	0	0	0	0	0	0	0	0	0	0	0	0	0
RANBP9	10048	symbol	H. sapiens	10048	H. sapiens	0	0	0	0	0	0	0	0	0	0	0	0	0	0	0	0	0	0	0	0
OSR2	116039	symbol	H. sapiens	116039	H. sapiens	0	0	0	0	0	0	0	0	0	0	0	0	0	0	0	0	0	0	0	0
RELB	5971	symbol	H. sapiens	5971	H. sapiens	0	0	1	0	1	0	1	1	0	0	0	1	0	0	0	0	0	0	0	0
SLC4A10	57282	symbol	H. sapiens	57282	H. sapiens	0	0	0	0	0	0	0	0	0	0	0	0	0	0	0	0	0	0	0	0
PLXNB2	23654	symbol	H. sapiens	23654	H. sapiens	0	0	0	0	0	0	0	0	0	0	0	0	0	0	0	0	0	0	0	0
GDI1	2664	symbol	H. sapiens	2664	H. sapiens	0	0	0	1	0	0	0	0	0	0	0	0	0	0	0	0	0	0	0	0
IFI30	10437	symbol	H. sapiens	10437	H. sapiens	1	1	0	0	1	0	0	0	0	0	0	0	0	0	0	0	0	0	0	0
HSPB8	26353	symbol	H. sapiens	26353	H. sapiens	0	0	0	0	0	0	0	0	0	0	0	0	0	0	1	1	0	0	1	0
AIFM2	84883	symbol	H. sapiens	84883	H. sapiens	0	0	0	1	0	0	0	0	0	0	0	0	0	0	0	0	0	0	0	0
NOCT	25819	symbol	H. sapiens	25819	H. sapiens	0	0	0	0	0	0	0	0	0	0	0	0	0	0	0	0	0	0	0	0
LAMB2	3913	symbol	H. sapiens	3913	H. sapiens	0	0	0	0	0	0	0	0	0	0	0	0	0	0	0	0	0	0	0	0
IGSF1	3547	symbol	H. sapiens	3547	H. sapiens	0	0	0	0	0	0	0	0	0	0	0	0	0	0	0	0	0	0	0	0
NMI	9111	symbol	H. sapiens	9111	H. sapiens	1	1	1	0	0	0	0	0	0	0	0	1	1	1	0	0	0	0	0	0
SOD2	6648	symbol	H. sapiens	6648	H. sapiens	1	0	0	1	0	0	0	0	0	0	0	0	0	0	0	1	1	0	0	0
OGFR	11054	symbol	H. sapiens	11054	H. sapiens	0	0	0	0	0	0	0	0	0	0	0	0	0	0	0	0	0	0	0	0
CCDC32	90416	symbol	H. sapiens	90416	H. sapiens	0	0	0	0	0	0	0	0	0	0	0	0	0	0	0	0	0	0	0	0
AKR1A1	10327	symbol	H. sapiens	10327	H. sapiens	0	0	0	0	0	0	0	0	0	1	0	0	0	0	0	0	0	0	0	0
PPP3CA	5530	symbol	H. sapiens	5530	H. sapiens	0	0	1	0	0	0	0	0	1	0	0	0	0	0	0	0	0	0	0	0
CORO1B	57175	symbol	H. sapiens	57175	H. sapiens	0	0	0	0	0	1	0	0	0	0	0	0	0	0	0	0	0	0	0	0
HERC6	55008	symbol	H. sapiens	55008	H. sapiens	0	0	0	0	0	0	0	0	0	0	0	0	1	0	0	0	0	0	0	0
NXPE3	91775	symbol	H. sapiens	91775	H. sapiens	0	0	0	0	0	0	0	0	0	0	0	0	0	0	0	0	0	0	0	0
EXOC6	54536	symbol	H. sapiens	54536	H. sapiens	0	0	0	0	0	0	0	0	0	0	0	0	0	0	0	0	0	0	0	0
ICAM1	3383	symbol	H. sapiens	3383	H. sapiens	1	1	0	1	1	1	1	0	1	0	0	0	0	0	0	1	0	0	0	1
C1QTNF6	114904	symbol	H. sapiens	114904	H. sapiens	0	0	0	0	0	0	0	0	0	0	0	0	0	0	0	0	1	0	0	0
SDCBP	6386	symbol	H. sapiens	6386	H. sapiens	0	0	0	0	0	0	1	0	0	0	0	0	1	0	0	1	0	0	0	0
GPR158	57512	symbol	H. sapiens	57512	H. sapiens	0	0	0	0	0	0	0	0	0	0	0	0	0	0	0	0	0	0	0	0
CRYBG1	202	symbol	H. sapiens	202	H. sapiens	0	0	0	0	0	0	0	0	0	0	0	0	0	0	0	0	0	0	0	0
POR	5447	symbol	H. sapiens	5447	H. sapiens	0	0	0	1	0	0	0	0	0	1	0	0	0	0	0	0	0	0	0	0
PSME1	5720	symbol	H. sapiens	5720	H. sapiens	1	0	1	1	1	0	0	0	0	1	0	0	1	0	0	0	0	0	0	0
TMEM55A	55529	gene_synonym	H. sapiens	55529	H. sapiens	0	0	0	0	0	0	0	0	0	0	0	0	0	0	0	0	0	0	0	0
SLC50A1	55974	symbol	H. sapiens	55974	H. sapiens	0	0	0	0	0	0	0	0	0	0	0	0	0	0	0	0	0	0	0	0
HYOU1	10525	symbol	H. sapiens	10525	H. sapiens	0	0	0	1	0	0	0	0	0	0	0	0	0	0	0	1	0	0	1	0
MAN2B1	4125	symbol	H. sapiens	4125	H. sapiens	0	0	0	0	0	0	1	0	0	0	0	0	0	0	0	0	0	0	0	0
DNAJA4	55466	symbol	H. sapiens	55466	H. sapiens	0	0	0	0	0	1	0	0	0	0	0	0	0	0	0	0	0	0	0	0
GUCD1	83606	symbol	H. sapiens	83606	H. sapiens	0	0	0	0	0	0	0	0	0	0	0	0	0	0	0	0	0	0	0	0
PSME2	5721	symbol	H. sapiens	5721	H. sapiens	1	0	1	1	1	0	0	0	0	1	0	0	1	0	0	0	0	0	0	0
TRIM38	10475	symbol	H. sapiens	10475	H. sapiens	1	1	1	0	0	1	0	1	1	0	0	1	1	1	0	0	0	0	0	0
ZC3H12A	80149	symbol	H. sapiens	80149	H. sapiens	1	0	1	1	1	1	1	1	1	0	0	0	0	1	1	1	1	0	0	0
USP32	84669	symbol	H. sapiens	84669	H. sapiens	0	0	0	0	0	0	0	0	0	0	0	0	1	0	0	0	0	0	0	0
WWC3	55841	symbol	H. sapiens	55841	H. sapiens	0	0	0	0	0	0	0	0	0	0	0	0	0	0	0	0	0	0	0	0
GPX3	2878	symbol	H. sapiens	2878	H. sapiens	0	0	0	0	0	0	0	0	0	0	0	0	0	0	0	0	1	0	0	0
RAB1B	81876	symbol	H. sapiens	81876	H. sapiens	1	0	0	0	0	0	0	0	0	0	0	0	0	0	1	0	0	0	0	0
STARD10	10809	symbol	H. sapiens	10809	H. sapiens	0	0	0	0	0	0	0	0	0	1	0	0	0	0	0	0	0	0	0	0
OASL	8638	symbol	H. sapiens	8638	H. sapiens	1	1	0	0	0	0	0	0	0	0	0	0	0	0	0	0	0	1	0	0
ZSWIM8	23053	symbol	H. sapiens	23053	H. sapiens	0	0	0	0	0	0	0	0	0	0	0	0	0	0	0	0	0	0	0	0
UBL3	5412	symbol	H. sapiens	5412	H. sapiens	0	0	0	0	0	0	0	0	0	0	0	0	0	0	0	0	0	0	0	0
RAB3D	9545	symbol	H. sapiens	9545	H. sapiens	0	0	0	0	0	0	1	0	0	0	0	0	0	0	0	0	0	0	0	0
UBE2QL1	134111	symbol	H. sapiens	134111	H. sapiens	0	0	0	0	0	0	0	0	0	0	0	0	0	0	0	0	0	0	0	0
LMCD1	29995	symbol	H. sapiens	29995	H. sapiens	0	0	0	0	0	0	0	0	0	0	0	0	0	0	0	0	0	0	0	0
ADAMTS9	56999	symbol	H. sapiens	56999	H. sapiens	0	0	0	0	0	1	0	0	0	0	0	0	0	0	0	0	0	0	0	0
PRSS22	64063	symbol	H. sapiens	64063	H. sapiens	0	0	0	0	0	0	0	0	0	0	0	0	0	0	0	0	0	0	0	0
BATF2	116071	symbol	H. sapiens	116071	H. sapiens	1	0	0	0	0	0	1	0	0	0	0	0	0	0	0	0	0	0	0	0
KIF13A	63971	symbol	H. sapiens	63971	H. sapiens	0	0	0	0	0	0	0	0	0	0	0	0	0	0	0	0	0	0	0	0
ACADS	35	symbol	H. sapiens	35	H. sapiens	0	0	0	0	0	0	0	0	0	0	0	0	0	0	0	0	0	0	0	0
DST	667	symbol	H. sapiens	667	H. sapiens	0	0	0	0	0	0	0	0	0	0	0	0	0	0	0	0	0	0	0	0
PPIC	5480	symbol	H. sapiens	5480	H. sapiens	0	0	0	0	0	0	0	0	0	0	0	0	0	0	0	0	0	0	0	0
RAB4B	53916	symbol	H. sapiens	53916	H. sapiens	0	0	0	0	0	0	1	0	0	0	0	0	0	0	0	0	0	0	0	0
MAGED1	9500	symbol	H. sapiens	9500	H. sapiens	0	0	0	1	0	0	0	0	0	0	0	0	0	0	0	0	0	0	0	0
MB21D2	151963	symbol	H. sapiens	151963	H. sapiens	0	0	0	0	0	0	0	0	0	0	0	0	0	0	0	0	0	0	0	0
CHMP5	51510	symbol	H. sapiens	51510	H. sapiens	1	0	0	0	0	0	0	0	0	0	0	0	0	0	0	0	0	0	0	0
P3H4	10609	symbol	H. sapiens	10609	H. sapiens	0	0	0	0	0	0	0	0	0	0	0	0	0	0	0	0	0	0	0	0
ANXA9	8416	symbol	H. sapiens	8416	H. sapiens	0	0	0	0	0	0	0	0	0	0	0	0	0	0	0	0	0	0	0	0
C3	718	symbol	H. sapiens	718	H. sapiens	0	0	1	1	1	0	1	0	0	1	0	0	0	0	0	0	0	0	0	0
AHR	196	symbol	H. sapiens	196	H. sapiens	0	0	0	0	0	0	0	0	0	0	0	0	0	0	0	0	0	0	0	0
CRISP3	10321	symbol	H. sapiens	10321	H. sapiens	0	0	0	0	0	0	1	0	0	0	0	0	0	0	0	0	0	0	0	0
BTN2A2	10385	symbol	H. sapiens	10385	H. sapiens	0	0	1	0	0	0	0	0	0	0	0	0	0	1	0	0	0	0	0	0
PCDH10	57575	symbol	H. sapiens	57575	H. sapiens	0	0	0	0	0	0	0	0	0	0	0	0	0	0	0	0	0	0	0	0
CSRP1	1465	symbol	H. sapiens	1465	H. sapiens	0	0	0	0	0	0	0	0	0	0	0	0	0	0	0	0	0	0	0	0
SCYL1	57410	symbol	H. sapiens	57410	H. sapiens	0	0	0	0	0	0	0	0	0	0	0	0	0	0	0	0	0	0	0	0
DDX58	23586	symbol	H. sapiens	23586	H. sapiens	1	0	1	0	1	0	1	0	1	0	0	1	0	0	0	0	0	0	0	0
GDAP1	54332	symbol	H. sapiens	54332	H. sapiens	0	0	0	0	0	0	0	0	0	0	0	0	0	0	0	0	0	0	0	0
FAM114A1	92689	symbol	H. sapiens	92689	H. sapiens	0	0	0	0	0	0	0	0	0	0	0	0	0	0	0	0	0	0	0	0
PSMB8-AS1	100507463	symbol	H. sapiens	100507463	H. sapiens	0	0	0	0	0	0	0	0	0	0	0	0	0	0	0	0	0	0	0	0
KIF5C	3800	symbol	H. sapiens	3800	H. sapiens	0	0	0	0	0	0	0	0	0	0	0	0	0	0	0	0	0	0	0	0
DNAJB2	3300	symbol	H. sapiens	3300	H. sapiens	0	0	0	1	0	0	0	0	0	0	0	0	1	0	1	0	0	0	1	0
DYNC1H1	1778	symbol	H. sapiens	1778	H. sapiens	0	0	0	0	1	0	1	0	0	0	0	0	0	0	0	0	0	0	0	0
SEC24D	9871	symbol	H. sapiens	9871	H. sapiens	0	0	0	0	1	0	0	0	0	0	0	0	0	0	0	0	0	0	0	0
AC009086.2						nan	nan	nan	nan	nan	nan	nan	nan	nan	nan	nan	nan	nan	nan	nan	nan	nan	nan	nan	nan
MYD88	4615	symbol	H. sapiens	4615	H. sapiens	1	0	1	0	0	0	0	1	1	0	0	1	0	0	0	0	0	0	0	0
PARP12	64761	symbol	H. sapiens	64761	H. sapiens	0	0	0	0	0	0	0	0	0	0	0	0	0	0	0	0	0	0	0	0
HIST2H3C	126961	gene_synonym	H. sapiens	126961	H. sapiens	1	0	0	0	0	0	0	0	0	0	0	0	0	0	0	0	0	0	0	0
HIST2H3A	333932	gene_synonym	H. sapiens	333932	H. sapiens	1	0	0	0	0	0	0	0	0	0	0	0	0	0	0	0	0	0	0	0
BTN2A1	11120	symbol	H. sapiens	11120	H. sapiens	0	0	1	0	0	0	0	0	0	0	0	0	0	0	0	0	0	0	0	0
IL17RA	23765	symbol	H. sapiens	23765	H. sapiens	1	0	1	0	0	0	0	0	0	0	0	0	0	0	0	0	0	0	0	0
TRIM26	7726	symbol	H. sapiens	7726	H. sapiens	1	1	0	0	0	1	0	0	1	0	0	0	0	0	0	0	0	0	0	0
AP001972.5						nan	nan	nan	nan	nan	nan	nan	nan	nan	nan	nan	nan	nan	nan	nan	nan	nan	nan	nan	nan
ADGRE1	2015	symbol	H. sapiens	2015	H. sapiens	0	0	0	0	1	0	0	0	0	0	0	0	0	0	0	0	0	0	0	0
VEZT	55591	symbol	H. sapiens	55591	H. sapiens	0	0	0	0	0	0	0	0	0	0	0	0	0	0	0	0	0	0	0	0
ACOT2	10965	symbol	H. sapiens	10965	H. sapiens	0	0	0	0	0	0	0	0	0	0	0	0	0	0	0	0	0	0	0	0
JUP	3728	symbol	H. sapiens	3728	H. sapiens	0	0	0	0	0	1	1	0	1	0	0	0	0	0	0	0	1	0	0	0
TRIM21	6737	symbol	H. sapiens	6737	H. sapiens	1	1	1	0	0	1	0	0	1	0	0	1	1	0	1	0	1	0	0	0
MIEF1	54471	symbol	H. sapiens	54471	H. sapiens	0	0	0	0	0	0	0	0	0	0	0	0	0	0	0	0	0	0	0	0
HIST1H2AI	8329	gene_synonym	H. sapiens	8329	H. sapiens	0	0	0	0	0	0	0	0	0	0	0	0	0	0	0	0	0	0	0	0
ATG2A	23130	symbol	H. sapiens	23130	H. sapiens	0	0	0	0	0	0	0	0	0	0	0	0	0	0	1	0	0	0	0	0
KRT19	3880	symbol	H. sapiens	3880	H. sapiens	0	0	0	0	0	0	0	0	0	0	0	0	0	0	0	0	0	0	0	0
RBL2	5934	symbol	H. sapiens	5934	H. sapiens	0	0	0	0	0	0	0	0	0	1	0	0	0	0	0	0	0	0	0	0
DDX60	55601	symbol	H. sapiens	55601	H. sapiens	1	0	1	0	1	0	0	0	0	0	0	0	0	0	0	0	0	0	0	0
SP100	6672	symbol	H. sapiens	6672	H. sapiens	1	1	0	1	0	1	0	0	1	0	0	0	0	0	0	0	0	0	0	1
C12orf57	113246	symbol	H. sapiens	113246	H. sapiens	0	0	0	0	0	0	0	0	0	0	0	0	0	0	0	0	0	0	0	0
TSPAN1	10103	symbol	H. sapiens	10103	H. sapiens	0	0	0	0	0	0	0	0	0	0	0	0	0	0	0	0	0	0	0	0
IFIT3	3437	symbol	H. sapiens	3437	H. sapiens	1	0	0	0	0	0	0	0	0	0	1	0	0	0	0	0	0	0	0	0
OSMR	9180	symbol	H. sapiens	9180	H. sapiens	1	0	1	0	0	0	0	0	0	0	0	0	0	0	0	0	0	0	0	0
WBP2	23558	symbol	H. sapiens	23558	H. sapiens	0	0	0	0	0	0	0	0	0	0	0	0	0	0	0	0	0	0	0	0
BEX3	27018	symbol	H. sapiens	27018	H. sapiens	0	0	0	1	0	0	0	0	0	0	0	0	0	0	0	0	0	0	0	1
AL365181.2						nan	nan	nan	nan	nan	nan	nan	nan	nan	nan	nan	nan	nan	nan	nan	nan	nan	nan	nan	nan
PIP4K2C	79837	symbol	H. sapiens	79837	H. sapiens	0	0	0	0	0	0	0	0	0	1	0	0	0	0	1	0	0	0	0	0
SLC17A5	26503	symbol	H. sapiens	26503	H. sapiens	0	0	0	0	0	0	0	0	0	0	0	0	0	0	0	0	0	0	0	0
KIAA1683	80726	gene_synonym	H. sapiens	80726	H. sapiens	0	0	0	0	0	0	0	0	0	0	0	0	0	0	0	0	0	0	0	0
TOM1	10043	symbol	H. sapiens	10043	H. sapiens	0	0	0	0	0	0	1	0	0	0	0	0	0	0	0	0	0	0	0	0
IER3	8870	symbol	H. sapiens	8870	H. sapiens	0	0	0	0	0	0	0	0	0	0	0	0	0	0	0	1	0	0	0	0
SLC25A1	6576	symbol	H. sapiens	6576	H. sapiens	0	0	0	0	0	0	0	0	0	0	0	0	0	0	0	0	0	0	0	0
CASP10	843	symbol	H. sapiens	843	H. sapiens	0	0	0	1	0	0	0	1	0	0	0	0	0	0	0	0	0	0	0	0
USP11	8237	symbol	H. sapiens	8237	H. sapiens	0	0	0	0	0	0	0	0	0	0	0	0	1	0	0	0	0	0	0	0
ATP6V0C	527	symbol	H. sapiens	527	H. sapiens	0	0	0	0	0	0	1	0	0	0	0	0	0	0	1	0	0	0	0	0
PPP2R5B	5526	symbol	H. sapiens	5526	H. sapiens	0	0	0	0	0	0	0	0	1	0	0	0	0	0	0	0	0	0	1	0
PML	5371	symbol	H. sapiens	5371	H. sapiens	1	1	1	1	0	1	0	0	0	0	0	0	1	0	0	1	0	0	1	1
SDCBP2	27111	symbol	H. sapiens	27111	H. sapiens	0	0	0	0	0	0	0	0	0	0	0	0	0	0	0	0	0	0	0	0
GOLGA3	2802	symbol	H. sapiens	2802	H. sapiens	0	0	0	0	0	0	0	0	0	0	0	0	0	0	0	0	0	0	0	0
AZI2	64343	symbol	H. sapiens	64343	H. sapiens	0	0	1	0	0	0	0	1	0	0	0	1	0	0	0	0	0	0	0	0
TNIP1	10318	symbol	H. sapiens	10318	H. sapiens	1	0	1	1	0	1	0	1	0	0	0	0	0	0	0	0	0	0	0	0
BATF	10538	symbol	H. sapiens	10538	H. sapiens	1	0	1	0	1	0	1	0	0	0	0	0	0	0	0	0	0	0	0	0
DHCR7	1717	symbol	H. sapiens	1717	H. sapiens	0	0	0	0	0	0	0	0	0	1	0	0	0	0	0	0	0	0	0	0
IDNK	414328	symbol	H. sapiens	414328	H. sapiens	0	0	0	0	0	0	0	0	0	0	0	0	0	0	0	0	0	0	0	0
GOLT1A	127845	symbol	H. sapiens	127845	H. sapiens	0	0	0	0	0	0	0	0	0	0	0	0	0	0	0	0	0	0	0	0
RETSAT	54884	symbol	H. sapiens	54884	H. sapiens	0	0	0	0	0	0	0	0	0	1	0	0	0	0	0	0	0	0	0	0
CLU	1191	symbol	H. sapiens	1191	H. sapiens	1	0	1	1	1	0	1	0	1	0	0	0	1	0	1	1	1	0	1	0
TNFSF10	8743	symbol	H. sapiens	8743	H. sapiens	0	0	0	1	0	0	0	1	0	0	0	0	0	0	0	1	0	0	0	1
AC010186.2						nan	nan	nan	nan	nan	nan	nan	nan	nan	nan	nan	nan	nan	nan	nan	nan	nan	nan	nan	nan
PRKD2	25865	symbol	H. sapiens	25865	H. sapiens	0	0	1	1	1	0	0	0	1	1	0	0	0	0	0	0	0	0	0	0
GSS	2937	symbol	H. sapiens	2937	H. sapiens	0	0	0	0	0	0	0	0	0	0	0	0	0	0	0	0	0	0	0	0
STAT6	6778	symbol	H. sapiens	6778	H. sapiens	1	0	1	0	1	0	1	0	0	0	0	1	0	1	0	0	0	0	0	0
IDI1	3422	symbol	H. sapiens	3422	H. sapiens	0	0	0	0	0	0	0	0	0	1	0	0	0	0	0	0	0	0	0	0
DHRS7	51635	symbol	H. sapiens	51635	H. sapiens	0	0	0	0	0	0	0	0	0	0	0	0	0	0	0	0	0	0	0	0
AC239868.2						nan	nan	nan	nan	nan	nan	nan	nan	nan	nan	nan	nan	nan	nan	nan	nan	nan	nan	nan	nan
ABCB6	10058	symbol	H. sapiens	10058	H. sapiens	0	0	0	0	0	0	0	0	0	0	0	0	0	0	0	0	0	0	0	0
ABCC3	8714	symbol	H. sapiens	8714	H. sapiens	0	0	0	0	0	0	0	0	0	0	0	0	0	0	0	0	0	0	0	0
IGF2R	3482	symbol	H. sapiens	3482	H. sapiens	1	0	0	1	0	0	1	0	0	0	0	0	0	0	0	0	0	0	0	0
NUDT16L1	84309	symbol	H. sapiens	84309	H. sapiens	0	0	0	0	0	0	0	0	0	0	0	0	0	0	0	1	0	0	0	0
GRINA	2907	symbol	H. sapiens	2907	H. sapiens	0	0	0	1	0	0	0	0	0	0	0	0	0	0	0	1	0	0	1	0
BLNK	29760	symbol	H. sapiens	29760	H. sapiens	0	0	0	0	0	0	0	0	0	0	0	0	0	0	0	0	0	0	0	0
P4HB	5034	symbol	H. sapiens	5034	H. sapiens	1	0	0	1	0	1	0	0	0	0	0	0	0	0	0	1	0	0	1	0
AC023509.1						nan	nan	nan	nan	nan	nan	nan	nan	nan	nan	nan	nan	nan	nan	nan	nan	nan	nan	nan	nan
ST3GAL4	6484	symbol	H. sapiens	6484	H. sapiens	0	0	0	0	0	0	0	0	0	1	0	0	0	0	0	0	0	0	0	0
CCL28	56477	symbol	H. sapiens	56477	H. sapiens	0	0	0	0	0	1	0	0	0	0	0	0	0	1	0	0	0	0	0	0
MICB	4277	symbol	H. sapiens	4277	H. sapiens	1	0	1	0	1	0	0	0	0	0	0	0	0	1	0	0	0	0	0	0
PLPPR2	64748	symbol	H. sapiens	64748	H. sapiens	0	0	0	0	0	0	0	0	0	0	0	0	0	0	0	0	0	0	0	0
ELF1	1997	symbol	H. sapiens	1997	H. sapiens	1	0	1	0	0	0	0	0	0	0	0	0	0	1	0	0	0	0	0	0
C1R	715	symbol	H. sapiens	715	H. sapiens	0	0	1	0	1	0	0	0	0	0	0	0	0	0	0	0	0	0	0	0
SULT2B1	6820	symbol	H. sapiens	6820	H. sapiens	0	0	0	0	0	0	0	0	0	1	0	0	0	0	0	0	0	0	0	0
NAGLU	4669	symbol	H. sapiens	4669	H. sapiens	0	0	0	0	0	0	0	0	0	0	0	0	0	0	0	0	0	0	0	0
USP35	57558	symbol	H. sapiens	57558	H. sapiens	0	0	0	0	0	0	0	0	0	0	0	0	1	0	0	0	0	0	0	0
TUBG2	27175	symbol	H. sapiens	27175	H. sapiens	0	0	0	0	0	0	0	0	0	0	0	0	0	0	0	0	0	0	0	0
RSAD2	91543	symbol	H. sapiens	91543	H. sapiens	1	0	1	0	1	0	0	0	0	0	0	0	0	0	0	0	0	0	0	0
ZC3HAV1	56829	symbol	H. sapiens	56829	H. sapiens	1	0	0	0	0	0	0	0	0	0	0	0	0	0	1	0	0	0	0	0
CLIP1	6249	symbol	H. sapiens	6249	H. sapiens	0	0	0	0	0	0	0	0	0	0	0	0	0	0	0	0	0	0	0	0
GRK2	156	symbol	H. sapiens	156	H. sapiens	1	0	0	0	0	1	0	0	0	0	0	0	0	0	0	0	0	0	0	0
BTN3A1	11119	symbol	H. sapiens	11119	H. sapiens	0	0	1	0	1	0	0	0	0	0	0	0	0	0	0	0	0	0	0	0
NECTIN4	81607	symbol	H. sapiens	81607	H. sapiens	1	0	0	0	0	1	0	0	0	0	0	0	0	0	0	0	0	0	0	0
DAZAP2	9802	symbol	H. sapiens	9802	H. sapiens	0	0	0	0	0	0	0	0	0	0	0	0	0	0	0	0	0	0	0	0
XAF1	54739	symbol	H. sapiens	54739	H. sapiens	1	0	0	0	0	0	0	0	0	0	1	0	0	0	0	0	0	0	0	0
CASP4	837	symbol	H. sapiens	837	H. sapiens	1	0	0	1	0	0	0	0	0	0	0	0	0	0	0	1	0	0	1	0
SUSD1	64420	symbol	H. sapiens	64420	H. sapiens	0	0	0	0	0	0	0	0	0	0	0	0	0	0	0	0	0	0	0	0
SC5D	6309	symbol	H. sapiens	6309	H. sapiens	0	0	0	0	0	0	0	0	0	1	0	0	0	0	0	0	0	0	0	0
DENND1B	163486	symbol	H. sapiens	163486	H. sapiens	0	0	1	1	1	0	0	0	0	0	0	0	0	0	0	0	0	0	0	0
PRRT3	285368	symbol	H. sapiens	285368	H. sapiens	0	0	0	0	0	0	0	0	0	0	0	0	0	0	0	0	0	0	0	0
AL671277.1						nan	nan	nan	nan	nan	nan	nan	nan	nan	nan	nan	nan	nan	nan	nan	nan	nan	nan	nan	nan
NCOR1	9611	symbol	H. sapiens	9611	H. sapiens	0	0	0	0	0	0	0	0	0	1	0	0	0	0	0	1	0	0	0	0
TFE3	7030	symbol	H. sapiens	7030	H. sapiens	0	0	0	0	1	0	0	0	0	0	0	0	0	0	0	0	0	0	0	0
CAP2	10486	symbol	H. sapiens	10486	H. sapiens	0	0	0	0	0	0	0	0	0	0	0	0	0	0	0	0	0	0	0	0
TAP2	6891	symbol	H. sapiens	6891	H. sapiens	0	0	0	0	1	0	0	0	0	0	0	0	0	0	0	0	0	0	0	0
RNF213	57674	symbol	H. sapiens	57674	H. sapiens	0	0	0	0	0	0	0	0	0	0	0	0	1	0	0	0	1	0	0	0
BIRC6	57448	symbol	H. sapiens	57448	H. sapiens	0	0	0	1	0	0	0	0	0	0	0	0	1	0	0	1	0	0	0	1
MVD	4597	symbol	H. sapiens	4597	H. sapiens	0	0	0	0	0	0	0	0	0	1	0	0	0	0	0	0	0	0	0	0
SLC16A4	9122	symbol	H. sapiens	9122	H. sapiens	0	0	0	0	0	0	0	0	0	0	0	0	0	0	0	0	0	0	0	0
TMEM63B	55362	symbol	H. sapiens	55362	H. sapiens	0	0	0	0	0	0	0	0	0	0	0	0	0	0	0	0	0	0	0	0
HSPA1A	3303	symbol	H. sapiens	3303	H. sapiens	1	0	1	1	0	1	1	0	1	0	0	0	1	0	1	1	0	1	1	1
AL035661.1						nan	nan	nan	nan	nan	nan	nan	nan	nan	nan	nan	nan	nan	nan	nan	nan	nan	nan	nan	nan
SMAP2	64744	symbol	H. sapiens	64744	H. sapiens	0	0	0	1	0	0	0	0	0	0	0	0	0	0	0	0	0	0	0	0
HGD	3081	symbol	H. sapiens	3081	H. sapiens	0	0	0	0	0	0	0	0	0	0	0	0	0	0	0	0	0	0	0	0
HM13	81502	symbol	H. sapiens	81502	H. sapiens	0	0	0	0	0	0	0	0	0	0	0	0	1	0	0	0	1	0	1	0
BIRC3	330	symbol	H. sapiens	330	H. sapiens	1	0	1	1	0	0	0	1	0	0	0	0	0	0	0	0	1	0	0	0
HID1	283987	symbol	H. sapiens	283987	H. sapiens	0	0	0	0	0	0	0	0	0	0	0	0	0	0	0	0	0	0	0	0
ATXN7L3B	552889	symbol	H. sapiens	552889	H. sapiens	0	0	0	0	0	0	0	0	0	0	0	0	0	0	0	0	0	0	0	0
SLC19A2	10560	symbol	H. sapiens	10560	H. sapiens	0	0	0	0	0	0	0	0	0	0	0	0	0	0	0	0	0	0	0	0
CGN	57530	symbol	H. sapiens	57530	H. sapiens	0	0	0	0	0	0	0	0	0	0	0	0	0	0	0	0	0	0	0	0
SEC24C	9632	symbol	H. sapiens	9632	H. sapiens	0	0	0	0	1	0	0	0	0	0	0	0	0	0	0	0	0	0	0	0
BNIPL	149428	symbol	H. sapiens	149428	H. sapiens	0	0	0	0	0	0	0	0	0	0	0	0	0	0	0	0	0	0	0	0
CD47	961	symbol	H. sapiens	961	H. sapiens	0	1	1	0	0	0	1	0	0	0	0	0	0	1	0	0	0	0	0	0
TAPBPL	55080	symbol	H. sapiens	55080	H. sapiens	0	0	0	0	1	0	0	0	0	0	0	0	0	1	0	0	0	0	0	0
CKMT1A	548596	symbol	H. sapiens	548596	H. sapiens	0	0	0	0	0	0	0	0	0	0	0	0	0	0	0	0	0	0	0	0
CYB5R1	51706	symbol	H. sapiens	51706	H. sapiens	0	0	0	0	0	0	1	0	0	1	0	0	0	0	0	0	0	0	0	0
RAB9A	9367	symbol	H. sapiens	9367	H. sapiens	0	0	0	0	0	0	0	0	0	0	0	0	0	0	0	0	0	0	0	0
ADAR	103	symbol	H. sapiens	103	H. sapiens	1	0	1	0	0	0	0	0	0	0	1	0	0	1	0	0	0	0	0	0
TSKU	25987	symbol	H. sapiens	25987	H. sapiens	0	0	0	0	0	0	0	0	0	0	0	0	0	0	0	0	0	0	0	0
COPG1	22820	symbol	H. sapiens	22820	H. sapiens	0	0	0	0	0	0	0	0	0	0	0	0	0	0	0	0	0	0	0	0
PPP1R15A	23645	symbol	H. sapiens	23645	H. sapiens	0	0	0	1	0	0	0	0	0	0	0	0	0	0	0	1	0	0	1	0
TDRD7	23424	symbol	H. sapiens	23424	H. sapiens	0	0	0	0	0	0	0	0	0	0	0	0	0	0	0	0	0	0	0	0
GLRX	2745	symbol	H. sapiens	2745	H. sapiens	0	0	0	0	0	0	0	0	0	0	0	0	0	0	0	0	0	0	0	0
DCAF6	55827	symbol	H. sapiens	55827	H. sapiens	0	0	0	0	0	0	0	0	0	0	0	0	0	0	0	0	0	0	0	0
ATP2A3	489	symbol	H. sapiens	489	H. sapiens	0	0	0	0	0	0	0	0	0	0	0	0	0	0	0	0	0	0	0	0
IFITM2	10581	symbol	H. sapiens	10581	H. sapiens	1	1	0	0	0	1	0	0	0	0	1	0	0	0	0	0	0	0	0	0
SPEN	23013	symbol	H. sapiens	23013	H. sapiens	0	0	0	0	0	0	0	0	0	0	0	0	0	0	0	0	0	0	0	0
COPB2	9276	symbol	H. sapiens	9276	H. sapiens	0	0	0	0	0	0	0	0	0	0	0	0	0	0	0	0	0	0	0	0
SERPINA5	5104	symbol	H. sapiens	5104	H. sapiens	0	0	0	1	0	0	0	0	0	0	0	0	0	0	0	0	0	0	0	0
HIST1H3H	8357	gene_synonym	H. sapiens	8357	H. sapiens	1	0	0	0	0	0	0	0	0	0	0	0	0	0	0	0	1	0	0	0
UBR4	23352	symbol	H. sapiens	23352	H. sapiens	0	0	0	0	0	0	1	0	0	0	0	0	1	0	0	0	0	0	0	0
DNAJA1	3301	symbol	H. sapiens	3301	H. sapiens	0	0	0	1	0	0	0	0	0	0	0	0	0	0	0	1	0	0	1	0
BAZ2A	11176	symbol	H. sapiens	11176	H. sapiens	0	0	0	0	0	0	0	0	0	0	0	0	0	0	0	0	0	0	0	0
BTN3A3	10384	symbol	H. sapiens	10384	H. sapiens	0	0	1	0	1	0	0	0	0	0	0	0	0	0	0	0	0	0	0	0
VTCN1	79679	symbol	H. sapiens	79679	H. sapiens	0	0	1	0	1	0	0	0	0	0	0	0	0	1	0	0	0	0	0	0
WWP2	11060	symbol	H. sapiens	11060	H. sapiens	1	0	0	0	0	1	0	0	1	0	0	0	1	0	1	0	0	0	0	0
PLPP1	8611	symbol	H. sapiens	8611	H. sapiens	0	0	0	0	0	0	0	0	0	1	0	0	0	0	0	0	0	0	0	0
ATPAF2	91647	symbol	H. sapiens	91647	H. sapiens	0	0	0	0	0	0	0	0	0	0	0	0	0	0	0	0	0	0	0	0
CDH3	1001	symbol	H. sapiens	1001	H. sapiens	0	0	1	0	0	0	0	0	0	1	0	0	0	0	0	0	0	0	0	0
MAP7D1	55700	symbol	H. sapiens	55700	H. sapiens	0	0	0	0	0	0	0	0	0	0	0	0	0	0	0	0	0	0	0	0
FGD6	55785	symbol	H. sapiens	55785	H. sapiens	0	0	0	0	0	0	0	0	0	0	0	0	0	0	0	0	0	0	0	0
MID2	11043	symbol	H. sapiens	11043	H. sapiens	1	0	0	0	0	1	0	1	1	0	0	0	0	0	1	0	0	0	0	0
ERN1	2081	symbol	H. sapiens	2081	H. sapiens	0	0	0	1	0	0	0	0	0	0	0	0	0	0	1	1	0	0	1	0
PPM1K	152926	symbol	H. sapiens	152926	H. sapiens	0	0	0	0	0	0	0	0	0	0	0	0	0	0	0	0	0	0	0	0
BCAP29	55973	symbol	H. sapiens	55973	H. sapiens	0	0	0	0	0	0	0	0	0	0	0	0	0	0	0	0	0	0	0	0
TSPYL2	64061	symbol	H. sapiens	64061	H. sapiens	0	0	0	0	0	0	0	0	0	0	0	0	0	0	0	0	0	0	1	0
HMGCR	3156	symbol	H. sapiens	3156	H. sapiens	0	0	0	1	0	0	0	0	0	1	0	0	1	0	0	1	1	0	0	0
SDC4	6385	symbol	H. sapiens	6385	H. sapiens	0	0	0	0	0	0	0	0	0	0	0	0	0	1	0	0	0	0	0	0
RABAC1	10567	symbol	H. sapiens	10567	H. sapiens	0	0	0	0	0	0	0	0	0	0	0	0	0	0	0	0	0	0	0	0
TBX3	6926	symbol	H. sapiens	6926	H. sapiens	0	0	0	0	0	0	0	0	0	0	0	0	0	0	0	0	0	0	0	0
S100A10	6281	symbol	H. sapiens	6281	H. sapiens	0	0	0	1	0	0	0	0	0	0	0	0	0	0	0	0	1	0	0	0
SARM1	23098	symbol	H. sapiens	23098	H. sapiens	0	0	1	0	0	0	0	0	0	0	0	0	0	1	0	0	0	0	0	0
SERF2	10169	symbol	H. sapiens	10169	H. sapiens	0	0	0	0	0	0	0	0	0	0	0	0	0	0	0	0	0	0	0	0
NCKAP5L	57701	symbol	H. sapiens	57701	H. sapiens	0	0	0	0	0	0	0	0	0	0	0	0	0	0	0	0	0	0	0	0
UBB	7314	symbol	H. sapiens	7314	H. sapiens	1	0	1	1	0	0	0	1	1	0	0	0	1	0	0	1	0	0	0	0
CTSH	1512	symbol	H. sapiens	1512	H. sapiens	0	0	1	1	1	0	1	0	0	0	0	0	1	0	0	0	0	0	0	0
GTF2F1	2962	symbol	H. sapiens	2962	H. sapiens	1	0	0	0	0	1	0	0	0	0	0	0	0	0	0	0	0	0	0	0
RBM24	221662	symbol	H. sapiens	221662	H. sapiens	0	0	0	0	0	0	0	0	0	0	0	0	0	0	1	0	0	0	0	0
TSPAN5	10098	symbol	H. sapiens	10098	H. sapiens	0	0	0	0	0	0	0	0	0	0	0	0	0	0	0	0	0	0	0	0
SIPA1L1	26037	symbol	H. sapiens	26037	H. sapiens	0	0	0	1	0	0	0	0	0	0	0	0	0	0	0	0	0	0	0	0
MOV10	4343	symbol	H. sapiens	4343	H. sapiens	0	0	0	0	0	0	0	0	0	0	0	0	0	0	1	0	0	0	0	0
CD63	967	symbol	H. sapiens	967	H. sapiens	0	0	0	0	0	0	1	0	0	0	0	0	0	0	0	0	0	0	0	0
NCDN	23154	symbol	H. sapiens	23154	H. sapiens	0	0	0	0	0	0	0	0	0	0	0	0	0	0	0	0	0	0	0	0
ITGB5	3693	symbol	H. sapiens	3693	H. sapiens	1	0	0	0	1	1	0	0	0	0	0	0	0	0	0	0	0	0	0	0
EFEMP1	2202	symbol	H. sapiens	2202	H. sapiens	0	0	0	0	0	0	0	0	0	0	0	0	0	0	0	0	0	0	0	0
PLD3	23646	symbol	H. sapiens	23646	H. sapiens	0	0	0	0	0	0	0	0	0	0	0	0	0	0	0	0	0	0	0	0
TFPT	29844	symbol	H. sapiens	29844	H. sapiens	0	0	0	1	0	0	0	0	0	0	0	0	0	0	0	0	0	0	0	0
PCDH1	5097	symbol	H. sapiens	5097	H. sapiens	0	0	0	0	0	0	0	0	0	0	0	0	0	0	0	0	0	0	0	0
TRIM22	10346	symbol	H. sapiens	10346	H. sapiens	1	1	0	0	0	0	0	1	1	0	0	0	0	0	1	0	1	0	0	0
BAG3	9531	symbol	H. sapiens	9531	H. sapiens	0	0	0	1	0	0	0	0	0	0	0	0	0	0	1	1	0	0	1	1
AMFR	267	symbol	H. sapiens	267	H. sapiens	0	0	0	0	0	0	0	0	0	0	0	0	1	0	0	0	1	0	1	0
LIMA1	51474	symbol	H. sapiens	51474	H. sapiens	0	0	0	0	0	0	0	0	0	1	0	0	0	0	0	0	0	0	0	0
DNAJC12	56521	symbol	H. sapiens	56521	H. sapiens	0	0	0	0	0	0	0	0	0	0	0	0	0	0	0	0	0	0	0	0
ADPRHL2	54936	symbol	H. sapiens	54936	H. sapiens	0	0	0	0	0	0	0	0	0	0	0	0	0	0	0	0	0	0	0	0
PHTF1	10745	symbol	H. sapiens	10745	H. sapiens	0	0	0	0	0	0	0	0	0	0	0	0	0	0	0	0	0	0	0	0
PPL	5493	symbol	H. sapiens	5493	H. sapiens	0	0	0	0	0	0	0	0	0	0	0	0	0	0	0	0	0	0	0	0
S100P	6286	symbol	H. sapiens	6286	H. sapiens	0	0	0	0	0	0	1	0	0	0	0	0	0	0	0	0	0	0	0	0
TRAFD1	10906	symbol	H. sapiens	10906	H. sapiens	0	0	1	0	0	0	0	0	0	0	0	0	0	1	0	0	0	0	0	0
TET2	54790	symbol	H. sapiens	54790	H. sapiens	0	0	0	0	0	0	0	0	0	0	0	0	0	0	0	0	0	0	0	0
TCEAL1	9338	symbol	H. sapiens	9338	H. sapiens	0	0	0	0	0	0	0	0	0	0	0	0	0	0	0	0	0	0	0	0
RAB39B	116442	symbol	H. sapiens	116442	H. sapiens	0	0	0	0	0	0	0	0	0	0	0	0	0	0	1	0	0	0	0	0
DRG2	1819	symbol	H. sapiens	1819	H. sapiens	0	0	0	0	0	0	0	0	0	0	0	0	0	0	0	0	0	0	0	0
PHKG2	5261	symbol	H. sapiens	5261	H. sapiens	0	0	0	0	0	0	0	0	0	1	0	0	0	0	1	0	0	0	0	0
LDHD	197257	symbol	H. sapiens	197257	H. sapiens	0	0	0	0	0	0	0	0	0	1	0	0	0	0	0	0	0	0	0	0
SERPINB8	5271	symbol	H. sapiens	5271	H. sapiens	0	0	0	1	0	0	0	0	0	0	0	0	0	0	0	0	0	0	0	0
C14orf132	56967	symbol	H. sapiens	56967	H. sapiens	0	0	0	0	0	0	0	0	0	0	0	0	0	0	0	0	0	0	0	0
RNASEK	440400	symbol	H. sapiens	440400	H. sapiens	0	0	0	0	0	0	0	0	0	0	0	0	0	0	0	0	0	0	0	0
TMEM205	374882	symbol	H. sapiens	374882	H. sapiens	0	0	0	0	0	0	0	0	0	0	0	0	0	0	0	0	0	0	0	0
SLC37A1	54020	symbol	H. sapiens	54020	H. sapiens	0	0	0	0	0	0	0	0	0	0	0	0	0	0	0	0	0	0	0	0
DTX3L	151636	symbol	H. sapiens	151636	H. sapiens	1	0	0	0	0	0	0	0	0	0	0	0	1	0	1	1	0	0	0	0
CDRT1	374286	symbol	H. sapiens	374286	H. sapiens	0	0	0	0	0	0	0	0	0	0	0	0	0	0	0	0	0	0	0	0
RUSC2	9853	symbol	H. sapiens	9853	H. sapiens	0	0	0	0	0	0	0	0	0	0	0	0	0	0	0	0	0	0	0	0
MAPK8IP2	23542	symbol	H. sapiens	23542	H. sapiens	0	0	0	1	0	0	0	0	0	0	0	0	0	0	0	1	0	0	0	0
TXNDC15	79770	symbol	H. sapiens	79770	H. sapiens	0	0	0	0	0	0	0	0	0	0	0	0	0	0	0	0	0	0	0	0
IGFBP2	3485	symbol	H. sapiens	3485	H. sapiens	0	0	0	0	0	0	0	0	0	0	0	0	0	0	0	0	0	0	0	0
NAXD	55739	symbol	H. sapiens	55739	H. sapiens	0	0	0	0	0	0	0	0	0	0	0	0	0	0	0	0	0	0	0	0
RORC	6097	symbol	H. sapiens	6097	H. sapiens	1	0	0	0	1	0	1	0	0	1	0	0	0	0	0	0	0	0	0	0
ATPIF1	93974	gene_synonym	H. sapiens	93974	H. sapiens	0	0	0	1	0	0	0	0	0	1	0	0	1	0	1	0	1	0	0	0
AC005538.2						nan	nan	nan	nan	nan	nan	nan	nan	nan	nan	nan	nan	nan	nan	nan	nan	nan	nan	nan	nan
P4HA2	8974	symbol	H. sapiens	8974	H. sapiens	0	0	0	0	0	0	0	0	0	0	0	0	0	0	0	0	0	0	0	0
NGEF	25791	symbol	H. sapiens	25791	H. sapiens	0	0	0	1	0	0	0	0	0	0	0	0	0	0	0	0	0	0	0	0
UPK2	7379	symbol	H. sapiens	7379	H. sapiens	0	0	0	0	0	0	0	0	0	0	0	0	0	0	0	0	0	0	0	0
MUC20	200958	symbol	H. sapiens	200958	H. sapiens	0	0	1	0	0	0	0	0	0	0	0	0	0	0	0	0	1	0	0	0
HIST1H2AC	8334	gene_synonym	H. sapiens	8334	H. sapiens	0	0	0	0	0	0	0	0	0	0	0	0	0	0	0	0	0	0	0	0
CAPN1	823	symbol	H. sapiens	823	H. sapiens	0	0	0	0	0	0	1	0	0	0	0	0	0	0	1	0	0	0	0	0
B3GALNT1	8706	symbol	H. sapiens	8706	H. sapiens	0	0	0	0	0	0	0	0	0	0	0	0	0	0	0	0	0	0	0	0
IKBKE	9641	symbol	H. sapiens	9641	H. sapiens	1	0	1	1	0	0	0	1	0	0	1	1	0	0	0	1	1	0	0	0
ELOVL5	60481	symbol	H. sapiens	60481	H. sapiens	0	0	0	0	0	0	0	0	0	1	0	0	0	0	0	0	0	0	0	0
MLLT11	10962	symbol	H. sapiens	10962	H. sapiens	0	0	0	1	0	0	0	0	0	0	0	0	0	0	0	1	0	0	0	1
DAPP1	27071	symbol	H. sapiens	27071	H. sapiens	0	0	0	0	0	0	0	0	0	0	0	0	0	0	0	0	0	0	0	0
USP40	55230	symbol	H. sapiens	55230	H. sapiens	0	0	0	0	0	0	0	0	0	0	0	0	1	0	0	0	0	0	0	0
SPDEF	25803	symbol	H. sapiens	25803	H. sapiens	0	0	0	1	0	0	0	0	0	0	0	0	0	0	0	0	0	0	0	0
HLA-DRB1	3123	symbol	H. sapiens	3123	H. sapiens	1	1	1	0	1	0	0	0	0	0	0	0	0	0	0	0	0	0	0	0
SQLE	6713	symbol	H. sapiens	6713	H. sapiens	0	0	0	0	0	0	0	0	0	1	0	0	0	0	0	0	0	0	0	0
RAB10	10890	symbol	H. sapiens	10890	H. sapiens	0	0	0	0	1	0	1	0	0	0	0	0	0	0	0	0	0	0	0	0
NINJ1	4814	symbol	H. sapiens	4814	H. sapiens	0	0	0	0	0	0	0	0	0	0	0	0	0	0	0	0	0	0	0	0
SOCS3	9021	symbol	H. sapiens	9021	H. sapiens	1	1	1	0	0	0	0	0	0	1	0	0	0	1	0	0	0	0	0	0
WIPI1	55062	symbol	H. sapiens	55062	H. sapiens	0	0	0	0	0	0	0	0	0	0	0	0	0	0	1	0	0	0	1	0
SQOR	58472	symbol	H. sapiens	58472	H. sapiens	0	0	0	0	0	0	0	0	0	0	0	0	0	0	0	0	0	0	0	0
ATP6V0E2	155066	symbol	H. sapiens	155066	H. sapiens	0	0	0	0	0	0	0	0	0	0	0	0	0	0	1	0	0	0	0	0
SCAF1	58506	symbol	H. sapiens	58506	H. sapiens	0	0	0	0	0	0	0	0	0	0	0	0	0	0	0	0	0	0	0	0
TMEM86A	144110	symbol	H. sapiens	144110	H. sapiens	0	0	0	0	0	0	0	0	0	0	0	0	0	0	0	0	0	0	0	0
HILPDA	29923	symbol	H. sapiens	29923	H. sapiens	0	0	1	0	0	0	0	0	0	0	0	0	0	0	0	0	0	0	0	0
PAK2	5062	symbol	H. sapiens	5062	H. sapiens	1	0	1	1	0	0	0	0	0	0	0	0	0	0	0	0	0	0	0	1
HSPH1	10808	symbol	H. sapiens	10808	H. sapiens	0	0	0	0	0	0	0	0	0	0	0	0	0	0	0	1	0	0	1	0
EPN3	55040	symbol	H. sapiens	55040	H. sapiens	0	0	0	0	0	0	0	0	0	0	0	0	0	0	0	0	0	0	0	0
LLGL2	3993	symbol	H. sapiens	3993	H. sapiens	0	0	0	1	0	0	0	0	0	0	0	0	0	0	0	0	0	0	0	0
ARID5B	84159	symbol	H. sapiens	84159	H. sapiens	0	0	0	0	0	0	0	0	1	0	0	0	0	0	0	0	0	0	0	0
GSK3B	2932	symbol	H. sapiens	2932	H. sapiens	0	0	0	1	0	0	1	0	0	1	0	0	1	0	1	1	0	0	1	1
COPA	1314	symbol	H. sapiens	1314	H. sapiens	0	0	0	0	0	0	0	0	0	0	0	0	0	0	0	0	0	0	0	0
ACSL3	2181	symbol	H. sapiens	2181	H. sapiens	0	0	0	0	0	0	0	0	0	1	0	0	0	0	0	0	0	0	0	0
ATP6V0D1	9114	symbol	H. sapiens	9114	H. sapiens	0	0	0	0	0	0	0	0	0	0	0	0	0	0	1	0	0	0	1	0
SFSWAP	6433	symbol	H. sapiens	6433	H. sapiens	0	0	0	0	0	0	0	0	0	0	0	0	0	0	0	0	0	0	0	0
ACP2	53	symbol	H. sapiens	53	H. sapiens	0	0	0	0	0	0	0	0	0	0	0	0	0	0	0	0	0	0	0	0
LINC00963	100506190	symbol	H. sapiens	100506190	H. sapiens	0	0	0	0	0	0	0	0	0	0	0	0	0	0	0	0	0	0	0	0
CLCN3	1182	symbol	H. sapiens	1182	H. sapiens	0	0	0	0	0	0	0	0	0	0	0	0	0	0	0	0	0	0	0	0
PISD	23761	symbol	H. sapiens	23761	H. sapiens	0	0	0	0	0	0	0	0	0	1	0	0	0	0	0	0	0	0	0	0
GBF1	8729	symbol	H. sapiens	8729	H. sapiens	1	0	0	0	0	0	1	0	0	0	0	0	0	0	0	0	0	0	0	0
AP1G1	164	symbol	H. sapiens	164	H. sapiens	0	0	1	0	1	0	1	0	0	0	0	0	0	0	0	0	0	0	0	0
HTATIP2	10553	symbol	H. sapiens	10553	H. sapiens	0	0	0	0	0	0	0	0	0	0	0	0	0	0	0	0	0	0	0	0

## Sheet: Enrichment_upregulated_genes
GroupID	Category	Term	Description	LogP	Log(q-value)	InTerm_InList	Genes	Symbols
1_Summary	GO Biological Processes	GO:0034340	response to type I interferon	-34.0099	-29.8093	35/99	103,684,2537,3105,3106,3107,3133,3429,3430,3433,3434,3437,3659,3669,4599,4600,4615,4938,4939,4940,5696,6672,6772,6773,8519,8638,9636,9641,10410,10581,11274,25939,54739,81844,91543,246,330,567,837,1997,2633,3123,3303,3383,3934,4582,4792,5034,5062,5371,5698,5720,5721,6097,6648,6737,6778,7076,7314,7706,7726,8357,8878,9021,9111,9180,10346,10437,10475,10538,10616,23765,54625,79602,83666,126961,333932,…	ADAR,BST2,IFI6,HLA-A,HLA-B,HLA-C,HLA-E,IFI27,IFI35,IFIT2,IFIT1,IFIT3,IRF1,ISG20,MX1,MX2,MYD88,OAS1,OAS2,OAS3,PSMB8,SP100,STAT1,STAT2,IFITM1,OASL,ISG15,IKBKE,IFITM3,IFITM2,USP18,SAMHD1,XAF1,TRIM56,RSAD2,ALOX15,BIRC3,B2M,CASP4,ELF1,GBP1,HLA-DRB1,HSPA1A,ICAM1,LCN2,MUC1,NFKBIA,P4HB,PAK2,PML,PSMB9,PSME1,PSME2,RORC,SOD2,TRIM21,STAT6,TIMP1,UBB,TRIM25,TRIM26,H3C10,SQSTM1,SOCS3,NMI,OSMR,TRIM22,IFI30,TRIM3…
1_Member	GO Biological Processes	GO:0034340	response to type I interferon	-34.0099	-29.8093	35/99	103,684,2537,3105,3106,3107,3133,3429,3430,3433,3434,3437,3659,3669,4599,4600,4615,4938,4939,4940,5696,6672,6772,6773,8519,8638,9636,9641,10410,10581,11274,25939,54739,81844,91543	ADAR,BST2,IFI6,HLA-A,HLA-B,HLA-C,HLA-E,IFI27,IFI35,IFIT2,IFIT1,IFIT3,IRF1,ISG20,MX1,MX2,MYD88,OAS1,OAS2,OAS3,PSMB8,SP100,STAT1,STAT2,IFITM1,OASL,ISG15,IKBKE,IFITM3,IFITM2,USP18,SAMHD1,XAF1,TRIM56,RSAD2
1_Member	GO Biological Processes	GO:0060337	type I interferon signaling pathway	-33.2604	-29.5369	34/95	103,684,2537,3105,3106,3107,3133,3429,3430,3433,3434,3437,3659,3669,4599,4600,4615,4938,4939,4940,5696,6672,6772,6773,8519,8638,9636,9641,10410,10581,11274,25939,54739,91543	ADAR,BST2,IFI6,HLA-A,HLA-B,HLA-C,HLA-E,IFI27,IFI35,IFIT2,IFIT1,IFIT3,IRF1,ISG20,MX1,MX2,MYD88,OAS1,OAS2,OAS3,PSMB8,SP100,STAT1,STAT2,IFITM1,OASL,ISG15,IKBKE,IFITM3,IFITM2,USP18,SAMHD1,XAF1,RSAD2
1_Member	GO Biological Processes	GO:0071357	cellular response to type I interferon	-33.2604	-29.5369	34/95	103,684,2537,3105,3106,3107,3133,3429,3430,3433,3434,3437,3659,3669,4599,4600,4615,4938,4939,4940,5696,6672,6772,6773,8519,8638,9636,9641,10410,10581,11274,25939,54739,91543	ADAR,BST2,IFI6,HLA-A,HLA-B,HLA-C,HLA-E,IFI27,IFI35,IFIT2,IFIT1,IFIT3,IRF1,ISG20,MX1,MX2,MYD88,OAS1,OAS2,OAS3,PSMB8,SP100,STAT1,STAT2,IFITM1,OASL,ISG15,IKBKE,IFITM3,IFITM2,USP18,SAMHD1,XAF1,RSAD2
1_Member	GO Biological Processes	GO:0019221	cytokine-mediated signaling pathway	-30.1412	-26.5427	76/798	103,246,330,567,684,837,1997,2537,2633,3105,3106,3107,3123,3133,3303,3383,3429,3430,3433,3434,3437,3659,3669,3934,4582,4599,4600,4615,4792,4938,4939,4940,5034,5062,5371,5696,5698,5720,5721,6097,6648,6672,6737,6772,6773,6778,7076,7314,7706,7726,8357,8519,8638,8878,9021,9111,9180,9636,9641,10346,10410,10437,10475,10538,10581,10616,11274,23765,25939,54625,54739,79602,83666,91543,126961,333932	ADAR,ALOX15,BIRC3,B2M,BST2,CASP4,ELF1,IFI6,GBP1,HLA-A,HLA-B,HLA-C,HLA-DRB1,HLA-E,HSPA1A,ICAM1,IFI27,IFI35,IFIT2,IFIT1,IFIT3,IRF1,ISG20,LCN2,MUC1,MX1,MX2,MYD88,NFKBIA,OAS1,OAS2,OAS3,P4HB,PAK2,PML,PSMB8,PSMB9,PSME1,PSME2,RORC,SOD2,SP100,TRIM21,STAT1,STAT2,STAT6,TIMP1,UBB,TRIM25,TRIM26,H3C10,IFITM1,OASL,SQSTM1,SOCS3,NMI,OSMR,ISG15,IKBKE,TRIM22,IFITM3,IFI30,TRIM38,BATF,IFITM2,RBCK1,USP18,IL17RA,SAMHD…
1_Member	GO Biological Processes	GO:0009615	response to virus	-25.236	-21.7344	46/327	103,330,684,1191,2537,2633,2635,2962,3429,3433,3434,3437,3659,3669,3934,3965,4277,4599,4600,4938,4939,4940,5359,5371,6772,6773,7706,8519,8638,8729,9636,9641,10346,10410,10475,10581,23586,25939,55601,56829,80149,81844,83666,91543,151636,201294	ADAR,BIRC3,BST2,CLU,IFI6,GBP1,GBP3,GTF2F1,IFI27,IFIT2,IFIT1,IFIT3,IRF1,ISG20,LCN2,LGALS9,MICB,MX1,MX2,OAS1,OAS2,OAS3,PLSCR1,PML,STAT1,STAT2,TRIM25,IFITM1,OASL,GBF1,ISG15,IKBKE,TRIM22,IFITM3,TRIM38,IFITM2,DDX58,SAMHD1,DDX60,ZC3HAV1,ZC3H12A,TRIM56,PARP9,RSAD2,DTX3L,UNC13D
1_Member	GO Biological Processes	GO:0051607	defense response to virus	-24.8938	-21.4714	40/239	103,330,684,2537,2633,2635,3429,3433,3434,3437,3659,3669,4277,4599,4600,4938,4939,4940,5359,5371,6772,6773,7706,8519,8638,9636,10346,10410,10475,10581,23586,25939,55601,56829,80149,81844,83666,91543,151636,201294	ADAR,BIRC3,BST2,IFI6,GBP1,GBP3,IFI27,IFIT2,IFIT1,IFIT3,IRF1,ISG20,MICB,MX1,MX2,OAS1,OAS2,OAS3,PLSCR1,PML,STAT1,STAT2,TRIM25,IFITM1,OASL,ISG15,TRIM22,IFITM3,TRIM38,IFITM2,DDX58,SAMHD1,DDX60,ZC3HAV1,ZC3H12A,TRIM56,PARP9,RSAD2,DTX3L,UNC13D
1_Member	GO Biological Processes	GO:0019058	viral life cycle	-20.4942	-17.2479	41/329	103,156,684,950,2040,3303,3383,3429,3434,3669,3693,3949,3965,4599,4938,4940,5034,5359,5371,6737,7314,7706,7726,8519,8638,9636,10318,10410,10475,10581,11043,11060,23327,51510,56829,57617,80149,81607,81876,84875,91543	ADAR,GRK2,BST2,SCARB2,STOM,HSPA1A,ICAM1,IFI27,IFIT1,ISG20,ITGB5,LDLR,LGALS9,MX1,OAS1,OAS3,P4HB,PLSCR1,PML,TRIM21,UBB,TRIM25,TRIM26,IFITM1,OASL,ISG15,TNIP1,IFITM3,TRIM38,IFITM2,MID2,WWP2,NEDD4L,CHMP5,ZC3HAV1,VPS18,ZC3H12A,NECTIN4,RAB1B,PARP10,RSAD2
1_Member	GO Biological Processes	GO:0098542	defense response to other organism	-20.3906	-17.19	53/571	103,330,684,2537,2633,2635,3133,3429,3433,3434,3437,3659,3669,3934,4277,4599,4600,4615,4938,4939,4940,5359,5371,6279,6280,6772,6773,7706,8347,8519,8638,9636,10133,10346,10410,10475,10497,10538,10581,23586,23765,25939,55601,56829,57402,80149,81844,83666,85236,91543,116071,151636,201294	ADAR,BIRC3,BST2,IFI6,GBP1,GBP3,HLA-E,IFI27,IFIT2,IFIT1,IFIT3,IRF1,ISG20,LCN2,MICB,MX1,MX2,MYD88,OAS1,OAS2,OAS3,PLSCR1,PML,S100A8,S100A9,STAT1,STAT2,TRIM25,H2BC4,IFITM1,OASL,ISG15,OPTN,TRIM22,IFITM3,TRIM38,UNC13B,BATF,IFITM2,DDX58,IL17RA,SAMHD1,DDX60,ZC3HAV1,S100A14,ZC3H12A,TRIM56,PARP9,H2BC12,RSAD2,BATF2,DTX3L,UNC13D
1_Member	GO Biological Processes	GO:0048525	negative regulation of viral process	-19.0742	-15.915	24/99	684,3434,3669,4599,4938,4940,5359,5371,6737,6772,7706,7726,8519,8638,9636,9830,10318,10410,10581,11043,56829,80149,84875,91543	BST2,IFIT1,ISG20,MX1,OAS1,OAS3,PLSCR1,PML,TRIM21,STAT1,TRIM25,TRIM26,IFITM1,OASL,ISG15,TRIM14,TNIP1,IFITM3,IFITM2,MID2,ZC3HAV1,ZC3H12A,PARP10,RSAD2
1_Member	GO Biological Processes	GO:1903900	regulation of viral life cycle	-18.9564	-15.835	28/149	103,684,2040,3429,3434,3669,3965,4599,4938,4940,5034,5359,5371,6737,7706,7726,8519,8638,9636,10318,10410,10475,10581,11043,56829,80149,84875,91543	ADAR,BST2,STOM,IFI27,IFIT1,ISG20,LGALS9,MX1,OAS1,OAS3,P4HB,PLSCR1,PML,TRIM21,TRIM25,TRIM26,IFITM1,OASL,ISG15,TNIP1,IFITM3,TRIM38,IFITM2,MID2,ZC3HAV1,ZC3H12A,PARP10,RSAD2
1_Member	GO Biological Processes	GO:0050792	regulation of viral process	-18.8492	-15.7626	32/208	103,684,2040,2962,3429,3434,3482,3669,3965,4599,4938,4940,5034,5359,5371,6737,6772,7706,7726,8519,8638,9636,9830,10318,10410,10475,10581,11043,56829,80149,84875,91543	ADAR,BST2,STOM,GTF2F1,IFI27,IFIT1,IGF2R,ISG20,LGALS9,MX1,OAS1,OAS3,P4HB,PLSCR1,PML,TRIM21,STAT1,TRIM25,TRIM26,IFITM1,OASL,ISG15,TRIM14,TNIP1,IFITM3,TRIM38,IFITM2,MID2,ZC3HAV1,ZC3H12A,PARP10,RSAD2
1_Member	GO Biological Processes	GO:1903901	negative regulation of viral life cycle	-18.2018	-15.1473	22/85	684,3434,3669,4599,4938,4940,5359,5371,6737,7706,7726,8519,8638,9636,10318,10410,10581,11043,56829,80149,84875,91543	BST2,IFIT1,ISG20,MX1,OAS1,OAS3,PLSCR1,PML,TRIM21,TRIM25,TRIM26,IFITM1,OASL,ISG15,TNIP1,IFITM3,IFITM2,MID2,ZC3HAV1,ZC3H12A,PARP10,RSAD2
1_Member	GO Biological Processes	GO:0043903	regulation of symbiosis, encompassing mutualism through parasitism	-17.9804	-14.9559	32/222	103,684,2040,2962,3429,3434,3482,3669,3965,4599,4938,4940,5034,5359,5371,6737,6772,7706,7726,8519,8638,9636,9830,10318,10410,10475,10581,11043,56829,80149,84875,91543	ADAR,BST2,STOM,GTF2F1,IFI27,IFIT1,IGF2R,ISG20,LGALS9,MX1,OAS1,OAS3,P4HB,PLSCR1,PML,TRIM21,STAT1,TRIM25,TRIM26,IFITM1,OASL,ISG15,TRIM14,TNIP1,IFITM3,TRIM38,IFITM2,MID2,ZC3HAV1,ZC3H12A,PARP10,RSAD2
1_Member	GO Biological Processes	GO:0043900	regulation of multi-organism process	-17.0836	-14.1134	41/407	103,330,684,2040,2962,3429,3434,3482,3669,3965,4277,4599,4938,4940,5034,5359,5371,6737,6772,7076,7706,7726,8519,8638,9636,9830,10133,10318,10410,10475,10497,10581,11043,23586,55601,56829,80149,83666,84875,91543,151636	ADAR,BIRC3,BST2,STOM,GTF2F1,IFI27,IFIT1,IGF2R,ISG20,LGALS9,MICB,MX1,OAS1,OAS3,P4HB,PLSCR1,PML,TRIM21,STAT1,TIMP1,TRIM25,TRIM26,IFITM1,OASL,ISG15,TRIM14,OPTN,TNIP1,IFITM3,TRIM38,UNC13B,IFITM2,MID2,DDX58,DDX60,ZC3HAV1,ZC3H12A,PARP9,PARP10,RSAD2,DTX3L
1_Member	GO Biological Processes	GO:0043901	negative regulation of multi-organism process	-16.2786	-13.3333	27/171	684,3434,3669,4277,4599,4938,4940,5359,5371,6737,6772,7076,7706,7726,8519,8638,9636,9830,10318,10410,10475,10581,11043,56829,80149,84875,91543	BST2,IFIT1,ISG20,MICB,MX1,OAS1,OAS3,PLSCR1,PML,TRIM21,STAT1,TIMP1,TRIM25,TRIM26,IFITM1,OASL,ISG15,TRIM14,TNIP1,IFITM3,TRIM38,IFITM2,MID2,ZC3HAV1,ZC3H12A,PARP10,RSAD2
1_Member	GO Biological Processes	GO:0045069	regulation of viral genome replication	-15.8749	-12.9531	21/95	103,684,2040,3429,3434,3669,4599,4938,4940,5359,8519,8638,9636,10318,10410,10475,10581,56829,80149,84875,91543	ADAR,BST2,STOM,IFI27,IFIT1,ISG20,MX1,OAS1,OAS3,PLSCR1,IFITM1,OASL,ISG15,TNIP1,IFITM3,TRIM38,IFITM2,ZC3HAV1,ZC3H12A,PARP10,RSAD2
1_Member	GO Biological Processes	GO:0045071	negative regulation of viral genome replication	-15.0625	-12.163	17/59	684,3434,3669,4599,4938,4940,5359,8519,8638,9636,10318,10410,10581,56829,80149,84875,91543	BST2,IFIT1,ISG20,MX1,OAS1,OAS3,PLSCR1,IFITM1,OASL,ISG15,TNIP1,IFITM3,IFITM2,ZC3HAV1,ZC3H12A,PARP10,RSAD2
1_Member	GO Biological Processes	GO:0019079	viral genome replication	-14.6191	-11.7407	22/122	103,156,684,2040,3429,3434,3669,4599,4938,4940,5359,8519,8638,9636,10318,10410,10475,10581,56829,80149,84875,91543	ADAR,GRK2,BST2,STOM,IFI27,IFIT1,ISG20,MX1,OAS1,OAS3,PLSCR1,IFITM1,OASL,ISG15,TNIP1,IFITM3,TRIM38,IFITM2,ZC3HAV1,ZC3H12A,PARP10,RSAD2
2_Summary	GO Biological Processes	GO:0060333	interferon-gamma-mediated signaling pathway	-22.6326	-19.2771	26/91	567,2633,3105,3106,3107,3123,3133,3383,3659,4938,4939,4940,5371,6672,6737,6772,7706,7726,8638,9021,9111,10346,10437,10475,54625,83666,684,961,2635,3965,8519,8942,10410,10581	B2M,GBP1,HLA-A,HLA-B,HLA-C,HLA-DRB1,HLA-E,ICAM1,IRF1,OAS1,OAS2,OAS3,PML,SP100,TRIM21,STAT1,TRIM25,TRIM26,OASL,SOCS3,NMI,TRIM22,IFI30,TRIM38,PARP14,PARP9,BST2,CD47,GBP3,LGALS9,IFITM1,KYNU,IFITM3,IFITM2
2_Member	GO Biological Processes	GO:0060333	interferon-gamma-mediated signaling pathway	-22.6326	-19.2771	26/91	567,2633,3105,3106,3107,3123,3133,3383,3659,4938,4939,4940,5371,6672,6737,6772,7706,7726,8638,9021,9111,10346,10437,10475,54625,83666	B2M,GBP1,HLA-A,HLA-B,HLA-C,HLA-DRB1,HLA-E,ICAM1,IRF1,OAS1,OAS2,OAS3,PML,SP100,TRIM21,STAT1,TRIM25,TRIM26,OASL,SOCS3,NMI,TRIM22,IFI30,TRIM38,PARP14,PARP9
2_Member	GO Biological Processes	GO:0034341	response to interferon-gamma	-21.5135	-18.216	34/199	567,684,961,2633,2635,3105,3106,3107,3123,3133,3383,3659,3965,4938,4939,4940,5371,6672,6737,6772,7706,7726,8519,8638,8942,9021,9111,10346,10410,10437,10475,10581,54625,83666	B2M,BST2,CD47,GBP1,GBP3,HLA-A,HLA-B,HLA-C,HLA-DRB1,HLA-E,ICAM1,IRF1,LGALS9,OAS1,OAS2,OAS3,PML,SP100,TRIM21,STAT1,TRIM25,TRIM26,IFITM1,OASL,KYNU,SOCS3,NMI,TRIM22,IFITM3,IFI30,TRIM38,IFITM2,PARP14,PARP9
2_Member	GO Biological Processes	GO:0071346	cellular response to interferon-gamma	-17.6925	-14.696	29/180	567,961,2633,2635,3105,3106,3107,3123,3133,3383,3659,3965,4938,4939,4940,5371,6672,6737,6772,7706,7726,8638,9021,9111,10346,10437,10475,54625,83666	B2M,CD47,GBP1,GBP3,HLA-A,HLA-B,HLA-C,HLA-DRB1,HLA-E,ICAM1,IRF1,LGALS9,OAS1,OAS2,OAS3,PML,SP100,TRIM21,STAT1,TRIM25,TRIM26,OASL,SOCS3,NMI,TRIM22,IFI30,TRIM38,PARP14,PARP9
3_Summary	GO Biological Processes	GO:0045088	regulation of innate immune response	-13.9571	-11.099	39/454	103,164,330,1520,3133,3303,3659,3965,4277,4582,4615,4792,5062,5359,5696,5698,5720,5721,5971,6279,6280,6772,7314,9021,9111,9641,10318,10906,11274,23098,23586,25939,51752,54625,55601,57402,83666,91543,200958,718,961,3949,9180,10133,10497,23765,629,715,1191,1997,2633,3123,10384,10385,10616,11119,11120,25865,79679,80149,163486,1512,5530,215,567,684,1001,1649,4791,5371,6284,6737,6778,7706,9246,9636,10…	ADAR,AP1G1,BIRC3,CTSS,HLA-E,HSPA1A,IRF1,LGALS9,MICB,MUC1,MYD88,NFKBIA,PAK2,PLSCR1,PSMB8,PSMB9,PSME1,PSME2,RELB,S100A8,S100A9,STAT1,UBB,SOCS3,NMI,IKBKE,TNIP1,TRAFD1,USP18,SARM1,DDX58,SAMHD1,ERAP1,PARP14,DDX60,S100A14,PARP9,RSAD2,MUC20,C3,CD47,LDLR,OSMR,OPTN,UNC13B,IL17RA,CFB,C1R,CLU,ELF1,GBP1,HLA-DRB1,BTN3A3,BTN2A2,RBCK1,BTN3A1,BTN2A1,PRKD2,VTCN1,ZC3H12A,DENND1B,CTSH,PPP3CA,ABCD1,B2M,BST2,CDH3,DDI…
3_Member	GO Biological Processes	GO:0045088	regulation of innate immune response	-13.9571	-11.099	39/454	103,164,330,1520,3133,3303,3659,3965,4277,4582,4615,4792,5062,5359,5696,5698,5720,5721,5971,6279,6280,6772,7314,9021,9111,9641,10318,10906,11274,23098,23586,25939,51752,54625,55601,57402,83666,91543,200958	ADAR,AP1G1,BIRC3,CTSS,HLA-E,HSPA1A,IRF1,LGALS9,MICB,MUC1,MYD88,NFKBIA,PAK2,PLSCR1,PSMB8,PSMB9,PSME1,PSME2,RELB,S100A8,S100A9,STAT1,UBB,SOCS3,NMI,IKBKE,TNIP1,TRAFD1,USP18,SARM1,DDX58,SAMHD1,ERAP1,PARP14,DDX60,S100A14,PARP9,RSAD2,MUC20
3_Member	GO Biological Processes	GO:0031349	positive regulation of defense response	-10.7125	-8.03043	37/524	164,330,718,961,1520,3133,3303,3659,3949,3965,4277,4582,4615,4792,5062,5359,5696,5698,5720,5721,5971,6279,6280,7314,9180,9641,10133,10318,10497,23098,23586,23765,55601,57402,83666,91543,200958	AP1G1,BIRC3,C3,CD47,CTSS,HLA-E,HSPA1A,IRF1,LDLR,LGALS9,MICB,MUC1,MYD88,NFKBIA,PAK2,PLSCR1,PSMB8,PSMB9,PSME1,PSME2,RELB,S100A8,S100A9,UBB,OSMR,IKBKE,OPTN,TNIP1,UNC13B,SARM1,DDX58,IL17RA,DDX60,S100A14,PARP9,RSAD2,MUC20
3_Member	GO Biological Processes	GO:0002253	activation of immune response	-10.4217	-7.77739	44/727	330,629,715,718,961,1191,1520,1997,2633,3123,3303,3659,3965,4277,4582,4615,4792,5062,5359,5696,5698,5720,5721,5971,6279,6280,7314,9641,10318,10384,10385,10616,11119,11120,23098,23586,25865,55601,57402,79679,80149,91543,163486,200958	BIRC3,CFB,C1R,C3,CD47,CLU,CTSS,ELF1,GBP1,HLA-DRB1,HSPA1A,IRF1,LGALS9,MICB,MUC1,MYD88,NFKBIA,PAK2,PLSCR1,PSMB8,PSMB9,PSME1,PSME2,RELB,S100A8,S100A9,UBB,IKBKE,TNIP1,BTN3A3,BTN2A2,RBCK1,BTN3A1,BTN2A1,SARM1,DDX58,PRKD2,DDX60,S100A14,VTCN1,ZC3H12A,RSAD2,DENND1B,MUC20
3_Member	GO Biological Processes	GO:0002764	immune response-regulating signaling pathway	-10.2796	-7.64719	42/678	330,961,1512,1520,1997,2633,3123,3303,3659,3965,4277,4582,4615,4792,5062,5359,5530,5696,5698,5720,5721,5971,6279,6280,7314,9641,10318,10384,10385,10616,11119,11120,23098,23586,25865,55601,57402,79679,80149,91543,163486,200958	BIRC3,CD47,CTSH,CTSS,ELF1,GBP1,HLA-DRB1,HSPA1A,IRF1,LGALS9,MICB,MUC1,MYD88,NFKBIA,PAK2,PLSCR1,PPP3CA,PSMB8,PSMB9,PSME1,PSME2,RELB,S100A8,S100A9,UBB,IKBKE,TNIP1,BTN3A3,BTN2A2,RBCK1,BTN3A1,BTN2A1,SARM1,DDX58,PRKD2,DDX60,S100A14,VTCN1,ZC3H12A,RSAD2,DENND1B,MUC20
3_Member	GO Biological Processes	GO:0002757	immune response-activating signal transduction	-9.84462	-7.25683	40/644	330,961,1520,1997,2633,3123,3303,3659,3965,4277,4582,4615,4792,5062,5359,5696,5698,5720,5721,5971,6279,6280,7314,9641,10318,10384,10385,10616,11119,11120,23098,23586,25865,55601,57402,79679,80149,91543,163486,200958	BIRC3,CD47,CTSS,ELF1,GBP1,HLA-DRB1,HSPA1A,IRF1,LGALS9,MICB,MUC1,MYD88,NFKBIA,PAK2,PLSCR1,PSMB8,PSMB9,PSME1,PSME2,RELB,S100A8,S100A9,UBB,IKBKE,TNIP1,BTN3A3,BTN2A2,RBCK1,BTN3A1,BTN2A1,SARM1,DDX58,PRKD2,DDX60,S100A14,VTCN1,ZC3H12A,RSAD2,DENND1B,MUC20
3_Member	GO Biological Processes	GO:0045089	positive regulation of innate immune response	-9.8311	-7.25377	30/384	164,330,1520,3133,3303,3659,3965,4277,4582,4615,4792,5062,5359,5696,5698,5720,5721,5971,6279,6280,7314,9641,10318,23098,23586,55601,57402,83666,91543,200958	AP1G1,BIRC3,CTSS,HLA-E,HSPA1A,IRF1,LGALS9,MICB,MUC1,MYD88,NFKBIA,PAK2,PLSCR1,PSMB8,PSMB9,PSME1,PSME2,RELB,S100A8,S100A9,UBB,IKBKE,TNIP1,SARM1,DDX58,DDX60,S100A14,PARP9,RSAD2,MUC20
3_Member	GO Biological Processes	GO:0001816	cytokine production	-9.75471	-7.20734	45/792	215,330,567,684,718,961,1001,1191,1649,1997,2633,3133,3303,3659,3965,4615,4791,5371,5971,6279,6280,6284,6737,6772,6778,7706,9111,9246,9636,9641,10385,10475,10538,11119,23586,23765,25865,29923,55601,64343,79679,80149,81844,91543,163486	ABCD1,BIRC3,B2M,BST2,C3,CD47,CDH3,CLU,DDIT3,ELF1,GBP1,HLA-E,HSPA1A,IRF1,LGALS9,MYD88,NFKB2,PML,RELB,S100A8,S100A9,S100A13,TRIM21,STAT1,STAT6,TRIM25,NMI,UBE2L6,ISG15,IKBKE,BTN2A2,TRIM38,BATF,BTN3A1,DDX58,IL17RA,PRKD2,HILPDA,DDX60,AZI2,VTCN1,ZC3H12A,TRIM56,RSAD2,DENND1B
3_Member	GO Biological Processes	GO:0002758	innate immune response-activating signal transduction	-8.83079	-6.38609	25/301	330,1520,3303,3659,3965,4582,4615,4792,5062,5696,5698,5720,5721,5971,6279,6280,7314,9641,10318,23098,23586,55601,57402,91543,200958	BIRC3,CTSS,HSPA1A,IRF1,LGALS9,MUC1,MYD88,NFKBIA,PAK2,PSMB8,PSMB9,PSME1,PSME2,RELB,S100A8,S100A9,UBB,IKBKE,TNIP1,SARM1,DDX58,DDX60,S100A14,RSAD2,MUC20
3_Member	GO Biological Processes	GO:0002218	activation of innate immune response	-8.23298	-5.90747	25/322	330,1520,3303,3659,3965,4582,4615,4792,5062,5696,5698,5720,5721,5971,6279,6280,7314,9641,10318,23098,23586,55601,57402,91543,200958	BIRC3,CTSS,HSPA1A,IRF1,LGALS9,MUC1,MYD88,NFKBIA,PAK2,PSMB8,PSMB9,PSME1,PSME2,RELB,S100A8,S100A9,UBB,IKBKE,TNIP1,SARM1,DDX58,DDX60,S100A14,RSAD2,MUC20
3_Member	GO Biological Processes	GO:0001817	regulation of cytokine production	-7.45371	-5.18255	38/720	215,330,567,684,718,961,1001,1191,1649,1997,2633,3133,3303,3659,3965,4615,4791,5371,5971,6737,6772,6778,7706,9111,9246,9636,9641,10385,10475,23586,23765,25865,29923,55601,79679,80149,81844,91543	ABCD1,BIRC3,B2M,BST2,C3,CD47,CDH3,CLU,DDIT3,ELF1,GBP1,HLA-E,HSPA1A,IRF1,LGALS9,MYD88,NFKB2,PML,RELB,TRIM21,STAT1,STAT6,TRIM25,NMI,UBE2L6,ISG15,IKBKE,BTN2A2,TRIM38,DDX58,IL17RA,PRKD2,HILPDA,DDX60,VTCN1,ZC3H12A,TRIM56,RSAD2
3_Member	GO Biological Processes	GO:0002221	pattern recognition receptor signaling pathway	-6.34011	-4.17696	17/200	330,1520,3303,3659,3965,4615,4792,6279,6280,7314,9641,10318,23098,23586,55601,57402,91543	BIRC3,CTSS,HSPA1A,IRF1,LGALS9,MYD88,NFKBIA,S100A8,S100A9,UBB,IKBKE,TNIP1,SARM1,DDX58,DDX60,S100A14,RSAD2
3_Member	GO Biological Processes	GO:0002224	toll-like receptor signaling pathway	-5.84316	-3.73249	14/149	330,1520,3659,3965,4615,4792,6279,6280,7314,9641,10318,23098,57402,91543	BIRC3,CTSS,IRF1,LGALS9,MYD88,NFKBIA,S100A8,S100A9,UBB,IKBKE,TNIP1,SARM1,S100A14,RSAD2
3_Member	GO Biological Processes	GO:0001819	positive regulation of cytokine production	-3.05	-1.35048	20/464	330,567,718,1191,1649,3133,3303,3659,3965,4615,4791,6772,6778,23586,23765,25865,29923,55601,79679,91543	BIRC3,B2M,C3,CLU,DDIT3,HLA-E,HSPA1A,IRF1,LGALS9,MYD88,NFKB2,STAT1,STAT6,DDX58,IL17RA,PRKD2,HILPDA,DDX60,VTCN1,RSAD2
4_Summary	GO Biological Processes	GO:0097190	apoptotic signaling pathway	-12.5506	-9.71179	43/602	309,837,843,1191,1512,1649,2081,2537,2668,2852,2907,2932,3301,3303,3383,3429,3934,3965,4582,5034,5062,5371,6279,6280,6478,6648,6672,7314,8743,9500,9531,9641,10525,10616,10962,23542,23645,27018,29844,51246,55031,57448,93974,330,684,718,1475,1476,1718,5104,5271,5447,5696,5698,5720,5721,7076,429,1917,3156,3433,3482,3776,8564,8878,10497,25791,25803,80149,83464,84883,3300,10318,389,2064,2664,3993,5359…	ANXA6,CASP4,CASP10,CLU,CTSH,DDIT3,ERN1,IFI6,GDNF,GPER1,GRINA,GSK3B,DNAJA1,HSPA1A,ICAM1,IFI27,LCN2,LGALS9,MUC1,P4HB,PAK2,PML,S100A8,S100A9,SIAH2,SOD2,SP100,UBB,TNFSF10,MAGED1,BAG3,IKBKE,HYOU1,RBCK1,MLLT11,MAPK8IP2,PPP1R15A,BEX3,TFPT,SHISA5,USP47,BIRC6,ATP5IF1,BIRC3,BST2,C3,CSTA,CSTB,DHCR24,SERPINA5,SERPINB8,POR,PSMB8,PSMB9,PSME1,PSME2,TIMP1,ASCL1,EEF1A2,HMGCR,IFIT2,IGF2R,KCNK2,KMO,SQSTM1,UNC13B,NG…
4_Member	GO Biological Processes	GO:0097190	apoptotic signaling pathway	-12.5506	-9.71179	43/602	309,837,843,1191,1512,1649,2081,2537,2668,2852,2907,2932,3301,3303,3383,3429,3934,3965,4582,5034,5062,5371,6279,6280,6478,6648,6672,7314,8743,9500,9531,9641,10525,10616,10962,23542,23645,27018,29844,51246,55031,57448,93974	ANXA6,CASP4,CASP10,CLU,CTSH,DDIT3,ERN1,IFI6,GDNF,GPER1,GRINA,GSK3B,DNAJA1,HSPA1A,ICAM1,IFI27,LCN2,LGALS9,MUC1,P4HB,PAK2,PML,S100A8,S100A9,SIAH2,SOD2,SP100,UBB,TNFSF10,MAGED1,BAG3,IKBKE,HYOU1,RBCK1,MLLT11,MAPK8IP2,PPP1R15A,BEX3,TFPT,SHISA5,USP47,BIRC6,ATP5IF1
4_Member	GO Biological Processes	GO:2001233	regulation of apoptotic signaling pathway	-9.89191	-7.28239	31/406	1191,1512,1649,2537,2668,2852,2907,2932,3301,3303,3383,3965,4582,5034,5062,5371,6279,6280,6478,6648,6672,7314,8743,9500,10525,10616,10962,23542,55031,57448,93974	CLU,CTSH,DDIT3,IFI6,GDNF,GPER1,GRINA,GSK3B,DNAJA1,HSPA1A,ICAM1,LGALS9,MUC1,P4HB,PAK2,PML,S100A8,S100A9,SIAH2,SOD2,SP100,UBB,TNFSF10,MAGED1,HYOU1,RBCK1,MLLT11,MAPK8IP2,USP47,BIRC6,ATP5IF1
4_Member	GO Biological Processes	GO:0052548	regulation of endopeptidase activity	-8.17466	-5.86057	29/425	330,684,718,837,843,1475,1476,1512,1718,2537,2852,3965,5062,5104,5271,5371,5447,5696,5698,5720,5721,6279,6280,6478,7076,8743,27018,55031,57448	BIRC3,BST2,C3,CASP4,CASP10,CSTA,CSTB,CTSH,DHCR24,IFI6,GPER1,LGALS9,PAK2,SERPINA5,SERPINB8,PML,POR,PSMB8,PSMB9,PSME1,PSME2,S100A8,S100A9,SIAH2,TIMP1,TNFSF10,BEX3,USP47,BIRC6
4_Member	GO Biological Processes	GO:0052547	regulation of peptidase activity	-7.58419	-5.30446	29/452	330,684,718,837,843,1475,1476,1512,1718,2537,2852,3965,5062,5104,5271,5371,5447,5696,5698,5720,5721,6279,6280,6478,7076,8743,27018,55031,57448	BIRC3,BST2,C3,CASP4,CASP10,CSTA,CSTB,CTSH,DHCR24,IFI6,GPER1,LGALS9,PAK2,SERPINA5,SERPINB8,PML,POR,PSMB8,PSMB9,PSME1,PSME2,S100A8,S100A9,SIAH2,TIMP1,TNFSF10,BEX3,USP47,BIRC6
4_Member	GO Biological Processes	GO:0010942	positive regulation of cell death	-6.37405	-4.20378	36/730	429,837,843,1191,1512,1649,1917,2852,2932,3156,3301,3433,3482,3776,3965,5062,5371,6279,6280,6648,7314,8564,8743,8878,9500,10497,10616,10962,25791,25803,27018,29844,80149,83464,84883,93974	ASCL1,CASP4,CASP10,CLU,CTSH,DDIT3,EEF1A2,GPER1,GSK3B,HMGCR,DNAJA1,IFIT2,IGF2R,KCNK2,LGALS9,PAK2,PML,S100A8,S100A9,SOD2,UBB,KMO,TNFSF10,SQSTM1,MAGED1,UNC13B,RBCK1,MLLT11,NGEF,SPDEF,BEX3,TFPT,ZC3H12A,APH1B,AIFM2,ATP5IF1
4_Member	GO Biological Processes	GO:0043065	positive regulation of apoptotic process	-6.30065	-4.14539	34/672	429,837,843,1191,1512,1649,1917,2852,2932,3156,3301,3433,3482,3965,5062,5371,6279,6280,6648,7314,8743,8878,9500,10497,10616,10962,25791,25803,27018,29844,80149,83464,84883,93974	ASCL1,CASP4,CASP10,CLU,CTSH,DDIT3,EEF1A2,GPER1,GSK3B,HMGCR,DNAJA1,IFIT2,IGF2R,LGALS9,PAK2,PML,S100A8,S100A9,SOD2,UBB,TNFSF10,SQSTM1,MAGED1,UNC13B,RBCK1,MLLT11,NGEF,SPDEF,BEX3,TFPT,ZC3H12A,APH1B,AIFM2,ATP5IF1
4_Member	GO Biological Processes	GO:0043068	positive regulation of programmed cell death	-6.18407	-4.0404	34/680	429,837,843,1191,1512,1649,1917,2852,2932,3156,3301,3433,3482,3965,5062,5371,6279,6280,6648,7314,8743,8878,9500,10497,10616,10962,25791,25803,27018,29844,80149,83464,84883,93974	ASCL1,CASP4,CASP10,CLU,CTSH,DDIT3,EEF1A2,GPER1,GSK3B,HMGCR,DNAJA1,IFIT2,IGF2R,LGALS9,PAK2,PML,S100A8,S100A9,SOD2,UBB,TNFSF10,SQSTM1,MAGED1,UNC13B,RBCK1,MLLT11,NGEF,SPDEF,BEX3,TFPT,ZC3H12A,APH1B,AIFM2,ATP5IF1
4_Member	GO Biological Processes	GO:2000116	regulation of cysteine-type endopeptidase activity	-5.90535	-3.78395	18/239	330,837,843,1512,1718,2537,2852,3965,5062,5371,5447,5698,6279,6280,6478,8743,27018,55031	BIRC3,CASP4,CASP10,CTSH,DHCR24,IFI6,GPER1,LGALS9,PAK2,PML,POR,PSMB9,S100A8,S100A9,SIAH2,TNFSF10,BEX3,USP47
4_Member	GO Biological Processes	GO:0043281	regulation of cysteine-type endopeptidase activity involved in apoptotic process	-5.90078	-3.78299	17/215	330,837,843,1512,1718,2537,2852,3965,5062,5371,5447,6279,6280,6478,8743,27018,55031	BIRC3,CASP4,CASP10,CTSH,DHCR24,IFI6,GPER1,LGALS9,PAK2,PML,POR,S100A8,S100A9,SIAH2,TNFSF10,BEX3,USP47
4_Member	GO Biological Processes	GO:2001235	positive regulation of apoptotic signaling pathway	-5.58851	-3.49514	15/179	1512,1649,2852,2932,3965,5062,5371,6279,6280,7314,8743,9500,10616,10962,93974	CTSH,DDIT3,GPER1,GSK3B,LGALS9,PAK2,PML,S100A8,S100A9,UBB,TNFSF10,MAGED1,RBCK1,MLLT11,ATP5IF1
4_Member	GO Biological Processes	GO:0045862	positive regulation of proteolysis	-4.43356	-2.46344	20/364	718,837,843,1191,1512,2852,2932,3300,3303,3965,5371,5720,5721,6279,6280,8743,10318,27018,80149,93974	C3,CASP4,CASP10,CLU,CTSH,GPER1,GSK3B,DNAJB2,HSPA1A,LGALS9,PML,PSME1,PSME2,S100A8,S100A9,TNFSF10,TNIP1,BEX3,ZC3H12A,ATP5IF1
4_Member	GO Biological Processes	GO:0010950	positive regulation of endopeptidase activity	-3.67903	-1.8248	12/178	837,843,1512,2852,3965,5371,5720,5721,6279,6280,8743,27018	CASP4,CASP10,CTSH,GPER1,LGALS9,PML,PSME1,PSME2,S100A8,S100A9,TNFSF10,BEX3
4_Member	GO Biological Processes	GO:0043280	positive regulation of cysteine-type endopeptidase activity involved in apoptotic process	-3.55986	-1.7413	10/132	837,843,1512,2852,3965,5371,6279,6280,8743,27018	CASP4,CASP10,CTSH,GPER1,LGALS9,PML,S100A8,S100A9,TNFSF10,BEX3
4_Member	GO Biological Processes	GO:0006919	activation of cysteine-type endopeptidase activity involved in apoptotic process	-3.55228	-1.73731	8/86	837,843,1512,5371,6279,6280,8743,27018	CASP4,CASP10,CTSH,PML,S100A8,S100A9,TNFSF10,BEX3
4_Member	GO Biological Processes	GO:0010952	positive regulation of peptidase activity	-3.27825	-1.51224	12/197	837,843,1512,2852,3965,5371,5720,5721,6279,6280,8743,27018	CASP4,CASP10,CTSH,GPER1,LGALS9,PML,PSME1,PSME2,S100A8,S100A9,TNFSF10,BEX3
4_Member	GO Biological Processes	GO:2001056	positive regulation of cysteine-type endopeptidase activity	-3.14324	-1.41979	10/149	837,843,1512,2852,3965,5371,6279,6280,8743,27018	CASP4,CASP10,CTSH,GPER1,LGALS9,PML,S100A8,S100A9,TNFSF10,BEX3
4_Member	GO Biological Processes	GO:0051345	positive regulation of hydrolase activity	-2.86789	-1.21386	28/771	389,837,843,1512,2064,2664,2852,2932,3300,3301,3303,3383,3965,3993,5359,5371,5720,5721,6279,6280,6281,8743,23645,25865,26037,27018,64744,163486	RHOC,CASP4,CASP10,CTSH,ERBB2,GDI1,GPER1,GSK3B,DNAJB2,DNAJA1,HSPA1A,ICAM1,LGALS9,LLGL2,PLSCR1,PML,PSME1,PSME2,S100A8,S100A9,S100A10,TNFSF10,PPP1R15A,PRKD2,SIPA1L1,BEX3,SMAP2,DENND1B
5_Summary	GO Biological Processes	GO:0019882	antigen processing and presentation	-12.2996	-9.49172	26/227	164,567,1512,1520,1778,3105,3106,3107,3123,3133,3383,3693,5696,5698,5720,5721,5971,6890,6891,6892,9632,9871,10437,10890,51752,55080,246,715,718,1191,2015,3659,4277,4791,6097,6778,7030,10384,10538,11119,25865,79679,80149,91543,163486,201294,3965,8542,85236,684,23586,55601	AP1G1,B2M,CTSH,CTSS,DYNC1H1,HLA-A,HLA-B,HLA-C,HLA-DRB1,HLA-E,ICAM1,ITGB5,PSMB8,PSMB9,PSME1,PSME2,RELB,TAP1,TAP2,TAPBP,SEC24C,SEC24D,IFI30,RAB10,ERAP1,TAPBPL,ALOX15,C1R,C3,CLU,ADGRE1,IRF1,MICB,NFKB2,RORC,STAT6,TFE3,BTN3A3,BATF,BTN3A1,PRKD2,VTCN1,ZC3H12A,RSAD2,DENND1B,UNC13D,LGALS9,APOL1,H2BC12,BST2,DDX58,DDX60
5_Member	GO Biological Processes	GO:0019882	antigen processing and presentation	-12.2996	-9.49172	26/227	164,567,1512,1520,1778,3105,3106,3107,3123,3133,3383,3693,5696,5698,5720,5721,5971,6890,6891,6892,9632,9871,10437,10890,51752,55080	AP1G1,B2M,CTSH,CTSS,DYNC1H1,HLA-A,HLA-B,HLA-C,HLA-DRB1,HLA-E,ICAM1,ITGB5,PSMB8,PSMB9,PSME1,PSME2,RELB,TAP1,TAP2,TAPBP,SEC24C,SEC24D,IFI30,RAB10,ERAP1,TAPBPL
5_Member	GO Biological Processes	GO:0002474	antigen processing and presentation of peptide antigen via MHC class I	-12.2944	-9.49172	18/97	567,3105,3106,3107,3133,3693,5696,5698,5720,5721,6890,6891,6892,9632,9871,10437,51752,55080	B2M,HLA-A,HLA-B,HLA-C,HLA-E,ITGB5,PSMB8,PSMB9,PSME1,PSME2,TAP1,TAP2,TAPBP,SEC24C,SEC24D,IFI30,ERAP1,TAPBPL
5_Member	GO Biological Processes	GO:0002483	antigen processing and presentation of endogenous peptide antigen	-11.7602	-8.99099	9/15	567,3105,3106,3107,3133,6890,6891,6892,51752	B2M,HLA-A,HLA-B,HLA-C,HLA-E,TAP1,TAP2,TAPBP,ERAP1
5_Member	GO Biological Processes	GO:0019885	antigen processing and presentation of endogenous peptide antigen via MHC class I	-11.7602	-8.99099	9/15	567,3105,3106,3107,3133,6890,6891,6892,51752	B2M,HLA-A,HLA-B,HLA-C,HLA-E,TAP1,TAP2,TAPBP,ERAP1
5_Member	GO Biological Processes	GO:0048002	antigen processing and presentation of peptide antigen	-10.5918	-7.92267	22/190	164,567,1520,1778,3105,3106,3107,3123,3133,3693,5696,5698,5720,5721,6890,6891,6892,9632,9871,10437,51752,55080	AP1G1,B2M,CTSS,DYNC1H1,HLA-A,HLA-B,HLA-C,HLA-DRB1,HLA-E,ITGB5,PSMB8,PSMB9,PSME1,PSME2,TAP1,TAP2,TAPBP,SEC24C,SEC24D,IFI30,ERAP1,TAPBPL
5_Member	GO Biological Processes	GO:0019883	antigen processing and presentation of endogenous antigen	-9.81574	-7.24889	9/22	567,3105,3106,3107,3133,6890,6891,6892,51752	B2M,HLA-A,HLA-B,HLA-C,HLA-E,TAP1,TAP2,TAPBP,ERAP1
5_Member	GO Biological Processes	GO:0002478	antigen processing and presentation of exogenous peptide antigen	-9.58157	-7.05309	20/175	164,567,1520,1778,3105,3106,3107,3123,3133,3693,5696,5698,5720,5721,6890,6891,6892,9632,9871,10437	AP1G1,B2M,CTSS,DYNC1H1,HLA-A,HLA-B,HLA-C,HLA-DRB1,HLA-E,ITGB5,PSMB8,PSMB9,PSME1,PSME2,TAP1,TAP2,TAPBP,SEC24C,SEC24D,IFI30
5_Member	GO Biological Processes	GO:0042590	antigen processing and presentation of exogenous peptide antigen via MHC class I	-9.41851	-6.90813	14/79	567,3105,3106,3107,3133,3693,5696,5698,5720,5721,6890,6891,6892,10437	B2M,HLA-A,HLA-B,HLA-C,HLA-E,ITGB5,PSMB8,PSMB9,PSME1,PSME2,TAP1,TAP2,TAPBP,IFI30
5_Member	GO Biological Processes	GO:0019884	antigen processing and presentation of exogenous antigen	-9.27598	-6.78345	20/182	164,567,1520,1778,3105,3106,3107,3123,3133,3693,5696,5698,5720,5721,6890,6891,6892,9632,9871,10437	AP1G1,B2M,CTSS,DYNC1H1,HLA-A,HLA-B,HLA-C,HLA-DRB1,HLA-E,ITGB5,PSMB8,PSMB9,PSME1,PSME2,TAP1,TAP2,TAPBP,SEC24C,SEC24D,IFI30
5_Member	GO Biological Processes	GO:0002479	antigen processing and presentation of exogenous peptide antigen via MHC class I, TAP-dependent	-8.66518	-6.25699	13/75	567,3105,3106,3107,3133,3693,5696,5698,5720,5721,6890,6891,6892	B2M,HLA-A,HLA-B,HLA-C,HLA-E,ITGB5,PSMB8,PSMB9,PSME1,PSME2,TAP1,TAP2,TAPBP
5_Member	GO Biological Processes	GO:0002428	antigen processing and presentation of peptide antigen via MHC class Ib	-8.36542	-6.0161	6/9	567,3105,3106,3107,3133,6891	B2M,HLA-A,HLA-B,HLA-C,HLA-E,TAP2
5_Member	GO Biological Processes	GO:0002476	antigen processing and presentation of endogenous peptide antigen via MHC class Ib	-6.82735	-4.5924	5/8	3105,3106,3107,3133,6891	HLA-A,HLA-B,HLA-C,HLA-E,TAP2
5_Member	GO Biological Processes	GO:0002480	antigen processing and presentation of exogenous peptide antigen via MHC class I, TAP-independent	-6.48221	-4.29447	5/9	567,3105,3106,3107,3133	B2M,HLA-A,HLA-B,HLA-C,HLA-E
5_Member	GO Biological Processes	GO:0002475	antigen processing and presentation via MHC class Ib	-6.43678	-4.25739	6/16	567,3105,3106,3107,3133,6891	B2M,HLA-A,HLA-B,HLA-C,HLA-E,TAP2
5_Member	GO Biological Processes	GO:0002250	adaptive immune response	-5.74987	-3.64966	33/679	246,567,715,718,1191,1512,1520,2015,3105,3106,3107,3123,3133,3383,3659,4277,4791,5971,6097,6778,6890,6891,7030,10384,10538,11119,25865,51752,79679,80149,91543,163486,201294	ALOX15,B2M,C1R,C3,CLU,CTSH,CTSS,ADGRE1,HLA-A,HLA-B,HLA-C,HLA-DRB1,HLA-E,ICAM1,IRF1,MICB,NFKB2,RELB,RORC,STAT6,TAP1,TAP2,TFE3,BTN3A3,BATF,BTN3A1,PRKD2,ERAP1,VTCN1,ZC3H12A,RSAD2,DENND1B,UNC13D
5_Member	GO Biological Processes	GO:0002484	antigen processing and presentation of endogenous peptide antigen via MHC class I via ER pathway	-5.31796	-3.24124	4/7	3105,3106,3107,3133	HLA-A,HLA-B,HLA-C,HLA-E
5_Member	GO Biological Processes	GO:0002486	antigen processing and presentation of endogenous peptide antigen via MHC class I via ER pathway, TA	-5.31796	-3.24124	4/7	3105,3106,3107,3133	HLA-A,HLA-B,HLA-C,HLA-E
5_Member	GO Biological Processes	GO:0001906	cell killing	-5.10975	-3.04271	14/172	164,567,718,1512,3105,3106,3107,3133,3383,3965,4277,8542,85236,201294	AP1G1,B2M,C3,CTSH,HLA-A,HLA-B,HLA-C,HLA-E,ICAM1,LGALS9,MICB,APOL1,H2BC12,UNC13D
5_Member	GO Biological Processes	GO:0001909	leukocyte mediated cytotoxicity	-5.05227	-2.99471	11/108	164,567,1512,3105,3106,3107,3133,3383,3965,4277,201294	AP1G1,B2M,CTSH,HLA-A,HLA-B,HLA-C,HLA-E,ICAM1,LGALS9,MICB,UNC13D
5_Member	GO Biological Processes	GO:0002456	T cell mediated immunity	-5.05227	-2.99471	11/108	567,1512,3105,3106,3107,3133,3383,4277,10384,91543,163486	B2M,CTSH,HLA-A,HLA-B,HLA-C,HLA-E,ICAM1,MICB,BTN3A3,RSAD2,DENND1B
5_Member	GO Biological Processes	GO:0002460	adaptive immune response based on somatic recombination of immune receptors built from immunoglobuli	-4.95956	-2.91127	21/363	567,715,718,1191,1512,3105,3106,3107,3133,3383,4277,4791,5971,6097,6778,10384,10538,80149,91543,163486,201294	B2M,C1R,C3,CLU,CTSH,HLA-A,HLA-B,HLA-C,HLA-E,ICAM1,MICB,NFKB2,RELB,RORC,STAT6,BTN3A3,BATF,ZC3H12A,RSAD2,DENND1B,UNC13D
5_Member	GO Biological Processes	GO:0001910	regulation of leukocyte mediated cytotoxicity	-4.67227	-2.65067	9/78	164,567,3105,3106,3107,3133,3383,3965,4277	AP1G1,B2M,HLA-A,HLA-B,HLA-C,HLA-E,ICAM1,LGALS9,MICB
5_Member	GO Biological Processes	GO:0002708	positive regulation of lymphocyte mediated immunity	-4.39119	-2.42361	10/105	164,567,718,3105,3106,3107,3133,4277,6778,91543	AP1G1,B2M,C3,HLA-A,HLA-B,HLA-C,HLA-E,MICB,STAT6,RSAD2
5_Member	GO Biological Processes	GO:0002703	regulation of leukocyte mediated immunity	-4.28016	-2.32755	14/204	164,567,684,718,3105,3106,3107,3133,3965,4277,6778,23586,91543,201294	AP1G1,B2M,BST2,C3,HLA-A,HLA-B,HLA-C,HLA-E,LGALS9,MICB,STAT6,DDX58,RSAD2,UNC13D
5_Member	GO Biological Processes	GO:0001913	T cell mediated cytotoxicity	-4.24185	-2.30134	7/51	567,1512,3105,3106,3107,3133,4277	B2M,CTSH,HLA-A,HLA-B,HLA-C,HLA-E,MICB
5_Member	GO Biological Processes	GO:0002705	positive regulation of leukocyte mediated immunity	-4.20287	-2.26475	11/133	164,567,718,3105,3106,3107,3133,4277,6778,23586,91543	AP1G1,B2M,C3,HLA-A,HLA-B,HLA-C,HLA-E,MICB,STAT6,DDX58,RSAD2
5_Member	GO Biological Processes	GO:0002449	lymphocyte mediated immunity	-4.12247	-2.20519	19/353	164,567,715,718,1191,1512,3105,3106,3107,3133,3383,3965,4277,6778,10384,10538,91543,163486,201294	AP1G1,B2M,C1R,C3,CLU,CTSH,HLA-A,HLA-B,HLA-C,HLA-E,ICAM1,LGALS9,MICB,STAT6,BTN3A3,BATF,RSAD2,DENND1B,UNC13D
5_Member	GO Biological Processes	GO:0001912	positive regulation of leukocyte mediated cytotoxicity	-3.97659	-2.07268	7/56	164,567,3105,3106,3107,3133,4277	AP1G1,B2M,HLA-A,HLA-B,HLA-C,HLA-E,MICB
5_Member	GO Biological Processes	GO:0002699	positive regulation of immune effector process	-3.94985	-2.0503	14/219	164,567,718,3105,3106,3107,3133,3965,4277,6778,23586,55601,91543,201294	AP1G1,B2M,C3,HLA-A,HLA-B,HLA-C,HLA-E,LGALS9,MICB,STAT6,DDX58,DDX60,RSAD2,UNC13D
5_Member	GO Biological Processes	GO:0001916	positive regulation of T cell mediated cytotoxicity	-3.88379	-1.9907	5/26	567,3105,3106,3107,3133	B2M,HLA-A,HLA-B,HLA-C,HLA-E
5_Member	GO Biological Processes	GO:0031341	regulation of cell killing	-3.78504	-1.9108	9/101	164,567,3105,3106,3107,3133,3383,3965,4277	AP1G1,B2M,HLA-A,HLA-B,HLA-C,HLA-E,ICAM1,LGALS9,MICB
5_Member	GO Biological Processes	GO:0002706	regulation of lymphocyte mediated immunity	-3.76083	-1.88864	11/149	164,567,718,3105,3106,3107,3133,3965,4277,6778,91543	AP1G1,B2M,C3,HLA-A,HLA-B,HLA-C,HLA-E,LGALS9,MICB,STAT6,RSAD2
5_Member	GO Biological Processes	GO:0002819	regulation of adaptive immune response	-3.49201	-1.68763	11/160	246,567,718,3105,3106,3107,3133,3659,6778,80149,91543	ALOX15,B2M,C3,HLA-A,HLA-B,HLA-C,HLA-E,IRF1,STAT6,ZC3H12A,RSAD2
5_Member	GO Biological Processes	GO:0002711	positive regulation of T cell mediated immunity	-3.48122	-1.68032	6/48	567,3105,3106,3107,3133,91543	B2M,HLA-A,HLA-B,HLA-C,HLA-E,RSAD2
5_Member	GO Biological Processes	GO:0031343	positive regulation of cell killing	-3.4427	-1.64866	7/68	164,567,3105,3106,3107,3133,4277	AP1G1,B2M,HLA-A,HLA-B,HLA-C,HLA-E,MICB
5_Member	GO Biological Processes	GO:0001914	regulation of T cell mediated cytotoxicity	-3.37536	-1.59803	5/33	567,3105,3106,3107,3133	B2M,HLA-A,HLA-B,HLA-C,HLA-E
5_Member	GO Biological Processes	GO:0002824	positive regulation of adaptive immune response based on somatic recombination of immune receptors b	-3.11021	-1.39677	8/100	567,718,3105,3106,3107,3133,6778,91543	B2M,C3,HLA-A,HLA-B,HLA-C,HLA-E,STAT6,RSAD2
5_Member	GO Biological Processes	GO:0002821	positive regulation of adaptive immune response	-2.97126	-1.28656	8/105	567,718,3105,3106,3107,3133,6778,91543	B2M,C3,HLA-A,HLA-B,HLA-C,HLA-E,STAT6,RSAD2
5_Member	GO Biological Processes	GO:0002822	regulation of adaptive immune response based on somatic recombination of immune receptors built from	-2.6484	-1.04661	9/145	567,718,3105,3106,3107,3133,6778,80149,91543	B2M,C3,HLA-A,HLA-B,HLA-C,HLA-E,STAT6,ZC3H12A,RSAD2
5_Member	GO Biological Processes	GO:0002709	regulation of T cell mediated immunity	-2.6089	-1.02357	6/70	567,3105,3106,3107,3133,91543	B2M,HLA-A,HLA-B,HLA-C,HLA-E,RSAD2
6_Summary	GO Biological Processes	GO:0046718	viral entry into host cell	-11.5193	-8.76591	19/122	156,950,3303,3383,3693,3949,3965,5034,6737,7706,7726,8519,10410,10475,10581,11043,11060,57617,81607,3434,5371,10318,80149,9830,2962,684,3728,6672,7076,55466,56477,56999,57175	GRK2,SCARB2,HSPA1A,ICAM1,ITGB5,LDLR,LGALS9,P4HB,TRIM21,TRIM25,TRIM26,IFITM1,IFITM3,TRIM38,IFITM2,MID2,WWP2,VPS18,NECTIN4,IFIT1,PML,TNIP1,ZC3H12A,TRIM14,GTF2F1,BST2,JUP,SP100,TIMP1,DNAJA4,CCL28,ADAMTS9,CORO1B
6_Member	GO Biological Processes	GO:0046718	viral entry into host cell	-11.5193	-8.76591	19/122	156,950,3303,3383,3693,3949,3965,5034,6737,7706,7726,8519,10410,10475,10581,11043,11060,57617,81607	GRK2,SCARB2,HSPA1A,ICAM1,ITGB5,LDLR,LGALS9,P4HB,TRIM21,TRIM25,TRIM26,IFITM1,IFITM3,TRIM38,IFITM2,MID2,WWP2,VPS18,NECTIN4
6_Member	GO Biological Processes	GO:0030260	entry into host cell	-10.7203	-8.03043	19/135	156,950,3303,3383,3693,3949,3965,5034,6737,7706,7726,8519,10410,10475,10581,11043,11060,57617,81607	GRK2,SCARB2,HSPA1A,ICAM1,ITGB5,LDLR,LGALS9,P4HB,TRIM21,TRIM25,TRIM26,IFITM1,IFITM3,TRIM38,IFITM2,MID2,WWP2,VPS18,NECTIN4
6_Member	GO Biological Processes	GO:0044409	entry into host	-10.7203	-8.03043	19/135	156,950,3303,3383,3693,3949,3965,5034,6737,7706,7726,8519,10410,10475,10581,11043,11060,57617,81607	GRK2,SCARB2,HSPA1A,ICAM1,ITGB5,LDLR,LGALS9,P4HB,TRIM21,TRIM25,TRIM26,IFITM1,IFITM3,TRIM38,IFITM2,MID2,WWP2,VPS18,NECTIN4
6_Member	GO Biological Processes	GO:0051806	entry into cell of other organism involved in symbiotic interaction	-10.7203	-8.03043	19/135	156,950,3303,3383,3693,3949,3965,5034,6737,7706,7726,8519,10410,10475,10581,11043,11060,57617,81607	GRK2,SCARB2,HSPA1A,ICAM1,ITGB5,LDLR,LGALS9,P4HB,TRIM21,TRIM25,TRIM26,IFITM1,IFITM3,TRIM38,IFITM2,MID2,WWP2,VPS18,NECTIN4
6_Member	GO Biological Processes	GO:0051828	entry into other organism involved in symbiotic interaction	-10.7203	-8.03043	19/135	156,950,3303,3383,3693,3949,3965,5034,6737,7706,7726,8519,10410,10475,10581,11043,11060,57617,81607	GRK2,SCARB2,HSPA1A,ICAM1,ITGB5,LDLR,LGALS9,P4HB,TRIM21,TRIM25,TRIM26,IFITM1,IFITM3,TRIM38,IFITM2,MID2,WWP2,VPS18,NECTIN4
6_Member	GO Biological Processes	GO:0051701	interaction with host	-10.5468	-7.89029	23/210	156,950,3303,3383,3434,3693,3949,3965,5034,5371,6737,7706,7726,8519,10318,10410,10475,10581,11043,11060,57617,80149,81607	GRK2,SCARB2,HSPA1A,ICAM1,IFIT1,ITGB5,LDLR,LGALS9,P4HB,PML,TRIM21,TRIM25,TRIM26,IFITM1,TNIP1,IFITM3,TRIM38,IFITM2,MID2,WWP2,VPS18,ZC3H12A,NECTIN4
6_Member	GO Biological Processes	GO:0046596	regulation of viral entry into host cell	-9.80601	-7.24889	10/30	3965,5034,6737,7706,7726,8519,10410,10475,10581,11043	LGALS9,P4HB,TRIM21,TRIM25,TRIM26,IFITM1,IFITM3,TRIM38,IFITM2,MID2
6_Member	GO Biological Processes	GO:0046597	negative regulation of viral entry into host cell	-5.92848	-3.80345	6/19	7706,7726,8519,10410,10581,11043	TRIM25,TRIM26,IFITM1,IFITM3,IFITM2,MID2
6_Member	GO Biological Processes	GO:1902187	negative regulation of viral release from host cell	-5.14724	-3.07699	5/15	5371,6737,7706,7726,11043	PML,TRIM21,TRIM25,TRIM26,MID2
6_Member	GO Biological Processes	GO:1902186	regulation of viral release from host cell	-3.50657	-1.69869	5/31	5371,6737,7706,7726,11043	PML,TRIM21,TRIM25,TRIM26,MID2
6_Member	GO Biological Processes	GO:0019076	viral release from host cell	-3.25326	-1.49984	5/35	5371,6737,7706,7726,11043	PML,TRIM21,TRIM25,TRIM26,MID2
6_Member	GO Biological Processes	GO:0035890	exit from host	-3.25326	-1.49984	5/35	5371,6737,7706,7726,11043	PML,TRIM21,TRIM25,TRIM26,MID2
6_Member	GO Biological Processes	GO:0035891	exit from host cell	-3.25326	-1.49984	5/35	5371,6737,7706,7726,11043	PML,TRIM21,TRIM25,TRIM26,MID2
6_Member	GO Biological Processes	GO:0052126	movement in host environment	-3.25326	-1.49984	5/35	5371,6737,7706,7726,11043	PML,TRIM21,TRIM25,TRIM26,MID2
6_Member	GO Biological Processes	GO:0052192	movement in environment of other organism involved in symbiotic interaction	-3.25326	-1.49984	5/35	5371,6737,7706,7726,11043	PML,TRIM21,TRIM25,TRIM26,MID2
6_Member	GO Biological Processes	GO:0032897	negative regulation of viral transcription	-2.9502	-1.27207	4/24	6737,9830,10410,11043	TRIM21,TRIM14,IFITM3,MID2
6_Member	GO Biological Processes	GO:0046782	regulation of viral transcription	-2.08279	-0.648621	5/64	2962,6737,9830,10410,11043	GTF2F1,TRIM21,TRIM14,IFITM3,MID2
6_Member	GO Biological Processes	GO:0040013	negative regulation of locomotion	-1.60708	-0.312835	14/396	684,3728,5371,6672,6737,7076,7706,7726,8519,11043,55466,56477,56999,57175	BST2,JUP,PML,SP100,TRIM21,TIMP1,TRIM25,TRIM26,IFITM1,MID2,DNAJA4,CCL28,ADAMTS9,CORO1B
7_Summary	GO Biological Processes	GO:0002274	myeloid leukocyte activation	-10.2234	-7.60261	41/653	527,567,684,718,823,961,967,1191,1476,1512,1520,1778,2040,2495,3303,3482,3728,3934,3949,3965,4125,4257,4758,5359,5971,6279,6280,6284,6286,6386,9545,9961,10043,10321,10538,10890,23352,53916,80149,116071,201294,164,3383,6097,6778,8729,3133,23586,2932,3959,7076,10497,26154,51706,57617	ATP6V0C,B2M,BST2,C3,CAPN1,CD47,CD63,CLU,CSTB,CTSH,CTSS,DYNC1H1,STOM,FTH1,HSPA1A,IGF2R,JUP,LCN2,LDLR,LGALS9,MAN2B1,MGST1,NEU1,PLSCR1,RELB,S100A8,S100A9,S100A13,S100P,SDCBP,RAB3D,MVP,TOM1,CRISP3,BATF,RAB10,UBR4,RAB4B,ZC3H12A,BATF2,UNC13D,AP1G1,ICAM1,RORC,STAT6,GBF1,HLA-E,DDX58,GSK3B,LGALS3BP,TIMP1,UNC13B,ABCA12,CYB5R1,VPS18
7_Member	GO Biological Processes	GO:0002274	myeloid leukocyte activation	-10.2234	-7.60261	41/653	527,567,684,718,823,961,967,1191,1476,1512,1520,1778,2040,2495,3303,3482,3728,3934,3949,3965,4125,4257,4758,5359,5971,6279,6280,6284,6286,6386,9545,9961,10043,10321,10538,10890,23352,53916,80149,116071,201294	ATP6V0C,B2M,BST2,C3,CAPN1,CD47,CD63,CLU,CSTB,CTSH,CTSS,DYNC1H1,STOM,FTH1,HSPA1A,IGF2R,JUP,LCN2,LDLR,LGALS9,MAN2B1,MGST1,NEU1,PLSCR1,RELB,S100A8,S100A9,S100A13,S100P,SDCBP,RAB3D,MVP,TOM1,CRISP3,BATF,RAB10,UBR4,RAB4B,ZC3H12A,BATF2,UNC13D
7_Member	GO Biological Processes	GO:0002263	cell activation involved in immune response	-9.60522	-7.0674	42/713	164,527,567,684,718,823,961,967,1476,1512,1520,1778,2040,2495,3303,3383,3482,3728,3934,3965,4125,4257,4758,5971,6097,6279,6280,6284,6286,6386,6778,8729,9545,9961,10043,10321,10538,10890,23352,53916,80149,201294	AP1G1,ATP6V0C,B2M,BST2,C3,CAPN1,CD47,CD63,CSTB,CTSH,CTSS,DYNC1H1,STOM,FTH1,HSPA1A,ICAM1,IGF2R,JUP,LCN2,LGALS9,MAN2B1,MGST1,NEU1,RELB,RORC,S100A8,S100A9,S100A13,S100P,SDCBP,STAT6,GBF1,RAB3D,MVP,TOM1,CRISP3,BATF,RAB10,UBR4,RAB4B,ZC3H12A,UNC13D
7_Member	GO Biological Processes	GO:0002444	myeloid leukocyte mediated immunity	-9.43648	-6.91714	36/554	527,567,684,718,823,961,967,1476,1512,1520,1778,2040,2495,3133,3303,3482,3728,3934,3965,4125,4257,4758,6279,6280,6284,6286,6386,9545,9961,10043,10321,10890,23352,23586,53916,201294	ATP6V0C,B2M,BST2,C3,CAPN1,CD47,CD63,CSTB,CTSH,CTSS,DYNC1H1,STOM,FTH1,HLA-E,HSPA1A,IGF2R,JUP,LCN2,LGALS9,MAN2B1,MGST1,NEU1,S100A8,S100A9,S100A13,S100P,SDCBP,RAB3D,MVP,TOM1,CRISP3,RAB10,UBR4,DDX58,RAB4B,UNC13D
7_Member	GO Biological Processes	GO:0043299	leukocyte degranulation	-9.24408	-6.76778	35/536	164,527,567,684,718,823,961,967,1476,1512,1520,1778,2040,2495,3303,3482,3728,3934,3965,4125,4257,4758,6279,6280,6284,6286,6386,9545,9961,10043,10321,10890,23352,53916,201294	AP1G1,ATP6V0C,B2M,BST2,C3,CAPN1,CD47,CD63,CSTB,CTSH,CTSS,DYNC1H1,STOM,FTH1,HSPA1A,IGF2R,JUP,LCN2,LGALS9,MAN2B1,MGST1,NEU1,S100A8,S100A9,S100A13,S100P,SDCBP,RAB3D,MVP,TOM1,CRISP3,RAB10,UBR4,RAB4B,UNC13D
7_Member	GO Biological Processes	GO:0002366	leukocyte activation involved in immune response	-9.14902	-6.68412	41/709	164,527,567,684,718,823,961,967,1476,1512,1520,1778,2040,2495,3303,3383,3482,3728,3934,3965,4125,4257,4758,5971,6097,6279,6280,6284,6286,6386,6778,9545,9961,10043,10321,10538,10890,23352,53916,80149,201294	AP1G1,ATP6V0C,B2M,BST2,C3,CAPN1,CD47,CD63,CSTB,CTSH,CTSS,DYNC1H1,STOM,FTH1,HSPA1A,ICAM1,IGF2R,JUP,LCN2,LGALS9,MAN2B1,MGST1,NEU1,RELB,RORC,S100A8,S100A9,S100A13,S100P,SDCBP,STAT6,RAB3D,MVP,TOM1,CRISP3,BATF,RAB10,UBR4,RAB4B,ZC3H12A,UNC13D
7_Member	GO Biological Processes	GO:0045055	regulated exocytosis	-8.69035	-6.26792	43/795	164,527,567,684,718,823,961,967,1191,1476,1512,1520,1778,2040,2495,2932,3303,3482,3728,3934,3959,3965,4125,4257,4758,6279,6280,6284,6286,6386,7076,9545,9961,10043,10321,10497,10890,23352,26154,51706,53916,57617,201294	AP1G1,ATP6V0C,B2M,BST2,C3,CAPN1,CD47,CD63,CLU,CSTB,CTSH,CTSS,DYNC1H1,STOM,FTH1,GSK3B,HSPA1A,IGF2R,JUP,LCN2,LGALS3BP,LGALS9,MAN2B1,MGST1,NEU1,S100A8,S100A9,S100A13,S100P,SDCBP,TIMP1,RAB3D,MVP,TOM1,CRISP3,UNC13B,RAB10,UBR4,ABCA12,CYB5R1,RAB4B,VPS18,UNC13D
7_Member	GO Biological Processes	GO:0043312	neutrophil degranulation	-8.58399	-6.1949	32/486	527,567,684,718,823,961,967,1476,1512,1520,1778,2040,2495,3303,3482,3728,3934,4125,4257,4758,6279,6280,6286,6386,9545,9961,10043,10321,10890,23352,53916,201294	ATP6V0C,B2M,BST2,C3,CAPN1,CD47,CD63,CSTB,CTSH,CTSS,DYNC1H1,STOM,FTH1,HSPA1A,IGF2R,JUP,LCN2,MAN2B1,MGST1,NEU1,S100A8,S100A9,S100P,SDCBP,RAB3D,MVP,TOM1,CRISP3,RAB10,UBR4,RAB4B,UNC13D
7_Member	GO Biological Processes	GO:0002283	neutrophil activation involved in immune response	-8.51907	-6.151	32/489	527,567,684,718,823,961,967,1476,1512,1520,1778,2040,2495,3303,3482,3728,3934,4125,4257,4758,6279,6280,6286,6386,9545,9961,10043,10321,10890,23352,53916,201294	ATP6V0C,B2M,BST2,C3,CAPN1,CD47,CD63,CSTB,CTSH,CTSS,DYNC1H1,STOM,FTH1,HSPA1A,IGF2R,JUP,LCN2,MAN2B1,MGST1,NEU1,S100A8,S100A9,S100P,SDCBP,RAB3D,MVP,TOM1,CRISP3,RAB10,UBR4,RAB4B,UNC13D
7_Member	GO Biological Processes	GO:0002275	myeloid cell activation involved in immune response	-8.46857	-6.11309	34/546	527,567,684,718,823,961,967,1476,1512,1520,1778,2040,2495,3303,3482,3728,3934,3965,4125,4257,4758,6279,6280,6284,6286,6386,9545,9961,10043,10321,10890,23352,53916,201294	ATP6V0C,B2M,BST2,C3,CAPN1,CD47,CD63,CSTB,CTSH,CTSS,DYNC1H1,STOM,FTH1,HSPA1A,IGF2R,JUP,LCN2,LGALS9,MAN2B1,MGST1,NEU1,S100A8,S100A9,S100A13,S100P,SDCBP,RAB3D,MVP,TOM1,CRISP3,RAB10,UBR4,RAB4B,UNC13D
7_Member	GO Biological Processes	GO:0042119	neutrophil activation	-8.30668	-5.96942	32/499	527,567,684,718,823,961,967,1476,1512,1520,1778,2040,2495,3303,3482,3728,3934,4125,4257,4758,6279,6280,6286,6386,9545,9961,10043,10321,10890,23352,53916,201294	ATP6V0C,B2M,BST2,C3,CAPN1,CD47,CD63,CSTB,CTSH,CTSS,DYNC1H1,STOM,FTH1,HSPA1A,IGF2R,JUP,LCN2,MAN2B1,MGST1,NEU1,S100A8,S100A9,S100P,SDCBP,RAB3D,MVP,TOM1,CRISP3,RAB10,UBR4,RAB4B,UNC13D
7_Member	GO Biological Processes	GO:0002446	neutrophil mediated immunity	-8.28577	-5.95443	32/500	527,567,684,718,823,961,967,1476,1512,1520,1778,2040,2495,3303,3482,3728,3934,4125,4257,4758,6279,6280,6286,6386,9545,9961,10043,10321,10890,23352,53916,201294	ATP6V0C,B2M,BST2,C3,CAPN1,CD47,CD63,CSTB,CTSH,CTSS,DYNC1H1,STOM,FTH1,HSPA1A,IGF2R,JUP,LCN2,MAN2B1,MGST1,NEU1,S100A8,S100A9,S100P,SDCBP,RAB3D,MVP,TOM1,CRISP3,RAB10,UBR4,RAB4B,UNC13D
7_Member	GO Biological Processes	GO:0036230	granulocyte activation	-8.20273	-5.88297	32/504	527,567,684,718,823,961,967,1476,1512,1520,1778,2040,2495,3303,3482,3728,3934,4125,4257,4758,6279,6280,6286,6386,9545,9961,10043,10321,10890,23352,53916,201294	ATP6V0C,B2M,BST2,C3,CAPN1,CD47,CD63,CSTB,CTSH,CTSS,DYNC1H1,STOM,FTH1,HSPA1A,IGF2R,JUP,LCN2,MAN2B1,MGST1,NEU1,S100A8,S100A9,S100P,SDCBP,RAB3D,MVP,TOM1,CRISP3,RAB10,UBR4,RAB4B,UNC13D
8_Summary	GO Biological Processes	GO:0007249	I-kappaB kinase/NF-kappaB signaling	-9.85555	-7.25703	25/269	330,389,684,843,3965,4615,4792,5971,6284,6772,7314,7706,8743,8878,9641,10133,10318,10346,10475,10616,11043,51246,64343,80149,80833	BIRC3,RHOC,BST2,CASP10,LGALS9,MYD88,NFKBIA,RELB,S100A13,STAT1,UBB,TRIM25,TNFSF10,SQSTM1,IKBKE,OPTN,TNIP1,TRIM22,TRIM38,RBCK1,MID2,SHISA5,AZI2,ZC3H12A,APOL3
8_Member	GO Biological Processes	GO:0007249	I-kappaB kinase/NF-kappaB signaling	-9.85555	-7.25703	25/269	330,389,684,843,3965,4615,4792,5971,6284,6772,7314,7706,8743,8878,9641,10133,10318,10346,10475,10616,11043,51246,64343,80149,80833	BIRC3,RHOC,BST2,CASP10,LGALS9,MYD88,NFKBIA,RELB,S100A13,STAT1,UBB,TRIM25,TNFSF10,SQSTM1,IKBKE,OPTN,TNIP1,TRIM22,TRIM38,RBCK1,MID2,SHISA5,AZI2,ZC3H12A,APOL3
8_Member	GO Biological Processes	GO:0043122	regulation of I-kappaB kinase/NF-kappaB signaling	-8.00564	-5.70269	21/237	330,389,684,843,3965,4615,6284,6772,7706,8743,8878,9641,10133,10318,10346,10475,10616,11043,51246,80149,80833	BIRC3,RHOC,BST2,CASP10,LGALS9,MYD88,S100A13,STAT1,TRIM25,TNFSF10,SQSTM1,IKBKE,OPTN,TNIP1,TRIM22,TRIM38,RBCK1,MID2,SHISA5,ZC3H12A,APOL3
8_Member	GO Biological Processes	GO:0043123	positive regulation of I-kappaB kinase/NF-kappaB signaling	-6.16679	-4.03067	16/183	330,389,684,843,3965,4615,6284,7706,8743,9641,10346,10475,10616,11043,51246,80833	BIRC3,RHOC,BST2,CASP10,LGALS9,MYD88,S100A13,TRIM25,TNFSF10,IKBKE,TRIM22,TRIM38,RBCK1,MID2,SHISA5,APOL3
9_Summary	GO Biological Processes	GO:0051091	positive regulation of DNA-binding transcription factor activity	-9.39046	-6.88885	24/261	1191,1649,3303,3383,3728,3965,4615,4791,5526,5530,6279,6280,6737,7314,7706,7726,9830,10346,10475,10616,11043,23586,25865,84159,4792,6672,11060,80149,84875	CLU,DDIT3,HSPA1A,ICAM1,JUP,LGALS9,MYD88,NFKB2,PPP2R5B,PPP3CA,S100A8,S100A9,TRIM21,UBB,TRIM25,TRIM26,TRIM14,TRIM22,TRIM38,RBCK1,MID2,DDX58,PRKD2,ARID5B,NFKBIA,SP100,WWP2,ZC3H12A,PARP10
9_Member	GO Biological Processes	GO:0051091	positive regulation of DNA-binding transcription factor activity	-9.39046	-6.88885	24/261	1191,1649,3303,3383,3728,3965,4615,4791,5526,5530,6279,6280,6737,7314,7706,7726,9830,10346,10475,10616,11043,23586,25865,84159	CLU,DDIT3,HSPA1A,ICAM1,JUP,LGALS9,MYD88,NFKB2,PPP2R5B,PPP3CA,S100A8,S100A9,TRIM21,UBB,TRIM25,TRIM26,TRIM14,TRIM22,TRIM38,RBCK1,MID2,DDX58,PRKD2,ARID5B
9_Member	GO Biological Processes	GO:0051090	regulation of DNA-binding transcription factor activity	-8.01662	-5.70814	29/432	1191,1649,3303,3383,3728,3965,4615,4791,4792,5526,5530,6279,6280,6672,6737,7314,7706,7726,9830,10346,10475,10616,11043,11060,23586,25865,80149,84159,84875	CLU,DDIT3,HSPA1A,ICAM1,JUP,LGALS9,MYD88,NFKB2,NFKBIA,PPP2R5B,PPP3CA,S100A8,S100A9,SP100,TRIM21,UBB,TRIM25,TRIM26,TRIM14,TRIM22,TRIM38,RBCK1,MID2,WWP2,DDX58,PRKD2,ZC3H12A,ARID5B,PARP10
9_Member	GO Biological Processes	GO:0051092	positive regulation of NF-kappaB transcription factor activity	-7.35966	-5.0986	16/150	1191,3303,3383,3965,4615,4791,6279,6280,7314,7706,9830,10346,10475,10616,11043,25865	CLU,HSPA1A,ICAM1,LGALS9,MYD88,NFKB2,S100A8,S100A9,UBB,TRIM25,TRIM14,TRIM22,TRIM38,RBCK1,MID2,PRKD2
9_Member	GO Biological Processes	GO:0032757	positive regulation of interleukin-8 production	-3.43164	-1.6393	6/49	1649,3303,3965,4615,23586,25865	DDIT3,HSPA1A,LGALS9,MYD88,DDX58,PRKD2
9_Member	GO Biological Processes	GO:0032677	regulation of interleukin-8 production	-2.48709	-0.938763	6/74	1649,3303,3965,4615,23586,25865	DDIT3,HSPA1A,LGALS9,MYD88,DDX58,PRKD2
9_Member	GO Biological Processes	GO:0032637	interleukin-8 production	-2.26704	-0.779109	6/82	1649,3303,3965,4615,23586,25865	DDIT3,HSPA1A,LGALS9,MYD88,DDX58,PRKD2
10_Summary	GO Biological Processes	GO:0016126	sterol biosynthetic process	-9.26802	-6.78345	14/81	1717,1718,2222,3156,3422,3638,4047,4597,5447,6309,6319,6713,6720,51706,3949,6820,8542,23780,51474,215,718,2181,2852,60481,79602,1312,2203,2932,5261,5696,5698,5720,5721,6097,9611,11182,93974,222,6817,10327,26509,51109,54884,18,246,1001,197257,1917,5934,8611,9021,85441,1382,4257,5359,6484,10809,23175,23761,25865,79143,79837,165679	DHCR7,DHCR24,FDFT1,HMGCR,IDI1,INSIG1,LSS,MVD,POR,SC5D,SCD,SQLE,SREBF1,CYB5R1,LDLR,SULT2B1,APOL1,APOL2,LIMA1,ABCD1,C3,ACSL3,GPER1,ELOVL5,ADIPOR2,COMT,FBP1,GSK3B,PHKG2,PSMB8,PSMB9,PSME1,PSME2,RORC,NCOR1,SLC2A6,ATP5IF1,ALDH3B2,SULT1A1,AKR1A1,MYOF,RDH11,RETSAT,ABAT,ALOX15,CDH3,LDHD,EEF1A2,RBL2,PLPP1,SOCS3,HELZ2,CRABP2,MGST1,PLSCR1,ST3GAL4,STARD10,LPIN1,PISD,PRKD2,MBOAT7,PIP4K2C,SPTSSB
10_Member	GO Biological Processes	GO:0016126	sterol biosynthetic process	-9.26802	-6.78345	14/81	1717,1718,2222,3156,3422,3638,4047,4597,5447,6309,6319,6713,6720,51706	DHCR7,DHCR24,FDFT1,HMGCR,IDI1,INSIG1,LSS,MVD,POR,SC5D,SCD,SQLE,SREBF1,CYB5R1
10_Member	GO Biological Processes	GO:0016125	sterol metabolic process	-9.14434	-6.68412	19/166	1717,1718,2222,3156,3422,3638,3949,4047,4597,5447,6309,6319,6713,6720,6820,8542,23780,51474,51706	DHCR7,DHCR24,FDFT1,HMGCR,IDI1,INSIG1,LDLR,LSS,MVD,POR,SC5D,SCD,SQLE,SREBF1,SULT2B1,APOL1,APOL2,LIMA1,CYB5R1
10_Member	GO Biological Processes	GO:0008203	cholesterol metabolic process	-9.03065	-6.57826	18/150	1717,1718,2222,3156,3422,3638,3949,4047,4597,5447,6309,6319,6713,6720,6820,8542,23780,51474	DHCR7,DHCR24,FDFT1,HMGCR,IDI1,INSIG1,LDLR,LSS,MVD,POR,SC5D,SCD,SQLE,SREBF1,SULT2B1,APOL1,APOL2,LIMA1
10_Member	GO Biological Processes	GO:1902652	secondary alcohol metabolic process	-8.79778	-6.36064	18/155	1717,1718,2222,3156,3422,3638,3949,4047,4597,5447,6309,6319,6713,6720,6820,8542,23780,51474	DHCR7,DHCR24,FDFT1,HMGCR,IDI1,INSIG1,LDLR,LSS,MVD,POR,SC5D,SCD,SQLE,SREBF1,SULT2B1,APOL1,APOL2,LIMA1
10_Member	GO Biological Processes	GO:0006695	cholesterol biosynthetic process	-8.66518	-6.25699	13/75	1717,1718,2222,3156,3422,3638,4047,4597,5447,6309,6319,6713,6720	DHCR7,DHCR24,FDFT1,HMGCR,IDI1,INSIG1,LSS,MVD,POR,SC5D,SCD,SQLE,SREBF1
10_Member	GO Biological Processes	GO:1902653	secondary alcohol biosynthetic process	-8.59141	-6.1949	13/76	1717,1718,2222,3156,3422,3638,4047,4597,5447,6309,6319,6713,6720	DHCR7,DHCR24,FDFT1,HMGCR,IDI1,INSIG1,LSS,MVD,POR,SC5D,SCD,SQLE,SREBF1
10_Member	GO Biological Processes	GO:0045540	regulation of cholesterol biosynthetic process	-8.57594	-6.1949	11/50	1717,2222,3156,3422,4047,4597,5447,6309,6319,6713,6720	DHCR7,FDFT1,HMGCR,IDI1,LSS,MVD,POR,SC5D,SCD,SQLE,SREBF1
10_Member	GO Biological Processes	GO:0106118	regulation of sterol biosynthetic process	-8.57594	-6.1949	11/50	1717,2222,3156,3422,4047,4597,5447,6309,6319,6713,6720	DHCR7,FDFT1,HMGCR,IDI1,LSS,MVD,POR,SC5D,SCD,SQLE,SREBF1
10_Member	GO Biological Processes	GO:0090181	regulation of cholesterol metabolic process	-8.53486	-6.16036	12/63	1717,2222,3156,3422,3949,4047,4597,5447,6309,6319,6713,6720	DHCR7,FDFT1,HMGCR,IDI1,LDLR,LSS,MVD,POR,SC5D,SCD,SQLE,SREBF1
10_Member	GO Biological Processes	GO:0046890	regulation of lipid biosynthetic process	-7.86158	-5.56949	19/198	215,718,1717,2181,2222,2852,3156,3422,3638,3949,4047,4597,5447,6309,6319,6713,6720,60481,79602	ABCD1,C3,DHCR7,ACSL3,FDFT1,GPER1,HMGCR,IDI1,INSIG1,LDLR,LSS,MVD,POR,SC5D,SCD,SQLE,SREBF1,ELOVL5,ADIPOR2
10_Member	GO Biological Processes	GO:0062012	regulation of small molecule metabolic process	-7.43919	-5.17311	29/459	215,1312,1717,2203,2222,2852,2932,3156,3422,3638,3949,4047,4597,5261,5447,5696,5698,5720,5721,6097,6309,6319,6713,6720,9611,11182,60481,79602,93974	ABCD1,COMT,DHCR7,FBP1,FDFT1,GPER1,GSK3B,HMGCR,IDI1,INSIG1,LDLR,LSS,MVD,PHKG2,POR,PSMB8,PSMB9,PSME1,PSME2,RORC,SC5D,SCD,SQLE,SREBF1,NCOR1,SLC2A6,ELOVL5,ADIPOR2,ATP5IF1
10_Member	GO Biological Processes	GO:1902930	regulation of alcohol biosynthetic process	-7.24962	-4.99353	12/81	1717,2222,2852,3156,3422,4047,4597,5447,6309,6319,6713,6720	DHCR7,FDFT1,GPER1,HMGCR,IDI1,LSS,MVD,POR,SC5D,SCD,SQLE,SREBF1
10_Member	GO Biological Processes	GO:0006066	alcohol metabolic process	-7.18123	-4.93004	25/364	222,1717,1718,2222,2852,3156,3422,3638,3949,4047,4597,5447,6309,6319,6713,6720,6817,6820,8542,10327,23780,26509,51109,51474,54884	ALDH3B2,DHCR7,DHCR24,FDFT1,GPER1,HMGCR,IDI1,INSIG1,LDLR,LSS,MVD,POR,SC5D,SCD,SQLE,SREBF1,SULT1A1,SULT2B1,APOL1,AKR1A1,APOL2,MYOF,RDH11,LIMA1,RETSAT
10_Member	GO Biological Processes	GO:1901615	organic hydroxy compound metabolic process	-7.06028	-4.81395	31/535	18,222,246,1001,1312,1717,1718,2222,2852,3156,3422,3638,3949,4047,4597,5447,6309,6319,6713,6720,6817,6820,8542,10327,23780,26509,51109,51474,51706,54884,197257	ABAT,ALDH3B2,ALOX15,CDH3,COMT,DHCR7,DHCR24,FDFT1,GPER1,HMGCR,IDI1,INSIG1,LDLR,LSS,MVD,POR,SC5D,SCD,SQLE,SREBF1,SULT1A1,SULT2B1,APOL1,AKR1A1,APOL2,MYOF,RDH11,LIMA1,CYB5R1,RETSAT,LDHD
10_Member	GO Biological Processes	GO:0019218	regulation of steroid metabolic process	-6.82449	-4.5924	14/124	1717,2222,3156,3422,3638,3949,4047,4597,5447,6097,6309,6319,6713,6720	DHCR7,FDFT1,HMGCR,IDI1,INSIG1,LDLR,LSS,MVD,POR,RORC,SC5D,SCD,SQLE,SREBF1
10_Member	GO Biological Processes	GO:0019216	regulation of lipid metabolic process	-6.76017	-4.54187	26/410	215,718,1717,1917,2181,2222,2852,3156,3422,3638,3949,4047,4597,5447,5934,6097,6309,6319,6713,6720,8611,9021,9611,60481,79602,85441	ABCD1,C3,DHCR7,EEF1A2,ACSL3,FDFT1,GPER1,HMGCR,IDI1,INSIG1,LDLR,LSS,MVD,POR,RBL2,RORC,SC5D,SCD,SQLE,SREBF1,PLPP1,SOCS3,NCOR1,ELOVL5,ADIPOR2,HELZ2
10_Member	GO Biological Processes	GO:0050810	regulation of steroid biosynthetic process	-6.46878	-4.28523	12/95	1717,2222,3156,3422,3638,4047,4597,5447,6309,6319,6713,6720	DHCR7,FDFT1,HMGCR,IDI1,INSIG1,LSS,MVD,POR,SC5D,SCD,SQLE,SREBF1
10_Member	GO Biological Processes	GO:0008610	lipid biosynthetic process	-6.23589	-4.08839	35/708	215,222,246,718,1382,1717,1718,2181,2222,2852,3156,3422,3638,3949,4047,4257,4597,5359,5447,6309,6319,6484,6713,6720,8611,10809,23175,23761,25865,51706,60481,79143,79602,79837,165679	ABCD1,ALDH3B2,ALOX15,C3,CRABP2,DHCR7,DHCR24,ACSL3,FDFT1,GPER1,HMGCR,IDI1,INSIG1,LDLR,LSS,MGST1,MVD,PLSCR1,POR,SC5D,SCD,ST3GAL4,SQLE,SREBF1,PLPP1,STARD10,LPIN1,PISD,PRKD2,CYB5R1,ELOVL5,MBOAT7,ADIPOR2,PIP4K2C,SPTSSB
10_Member	GO Biological Processes	GO:0008202	steroid metabolic process	-6.15026	-4.01787	22/331	1312,1717,1718,2222,3156,3422,3638,3949,4047,4597,5447,6097,6309,6319,6713,6720,6817,6820,8542,23780,51474,51706	COMT,DHCR7,DHCR24,FDFT1,HMGCR,IDI1,INSIG1,LDLR,LSS,MVD,POR,RORC,SC5D,SCD,SQLE,SREBF1,SULT1A1,SULT2B1,APOL1,APOL2,LIMA1,CYB5R1
10_Member	GO Biological Processes	GO:0046165	alcohol biosynthetic process	-5.02352	-2.97217	14/175	1717,1718,2222,2852,3156,3422,3638,4047,4597,5447,6309,6319,6713,6720	DHCR7,DHCR24,FDFT1,GPER1,HMGCR,IDI1,INSIG1,LSS,MVD,POR,SC5D,SCD,SQLE,SREBF1
10_Member	GO Biological Processes	GO:1901617	organic hydroxy compound biosynthetic process	-4.56599	-2.56407	17/271	246,1001,1717,1718,2222,2852,3156,3422,3638,4047,4597,5447,6309,6319,6713,6720,51706	ALOX15,CDH3,DHCR7,DHCR24,FDFT1,GPER1,HMGCR,IDI1,INSIG1,LSS,MVD,POR,SC5D,SCD,SQLE,SREBF1,CYB5R1
10_Member	GO Biological Processes	GO:0006694	steroid biosynthetic process	-4.47031	-2.48932	14/196	1717,1718,2222,3156,3422,3638,4047,4597,5447,6309,6319,6713,6720,51706	DHCR7,DHCR24,FDFT1,HMGCR,IDI1,INSIG1,LSS,MVD,POR,SC5D,SCD,SQLE,SREBF1,CYB5R1
11_Summary	GO Biological Processes	GO:0035456	response to interferon-beta	-8.71844	-6.28871	9/28	684,3659,5359,6772,8519,9641,10410,10581,54739,103,3433,3437,4600	BST2,IRF1,PLSCR1,STAT1,IFITM1,IKBKE,IFITM3,IFITM2,XAF1,ADAR,IFIT2,IFIT3,MX2
11_Member	GO Biological Processes	GO:0035456	response to interferon-beta	-8.71844	-6.28871	9/28	684,3659,5359,6772,8519,9641,10410,10581,54739	BST2,IRF1,PLSCR1,STAT1,IFITM1,IKBKE,IFITM3,IFITM2,XAF1
11_Member	GO Biological Processes	GO:0035455	response to interferon-alpha	-8.48653	-6.12481	8/21	103,684,3433,3437,4600,8519,10410,10581	ADAR,BST2,IFIT2,IFIT3,MX2,IFITM1,IFITM3,IFITM2
12_Summary	GO Biological Processes	GO:0032606	type I interferon production	-8.35563	-6.01239	16/128	3659,4615,4791,5971,6737,6772,6778,7706,9111,9246,9636,9641,10475,23586,64343,81844	IRF1,MYD88,NFKB2,RELB,TRIM21,STAT1,STAT6,TRIM25,NMI,UBE2L6,ISG15,IKBKE,TRIM38,DDX58,AZI2,TRIM56
12_Member	GO Biological Processes	GO:0032606	type I interferon production	-8.35563	-6.01239	16/128	3659,4615,4791,5971,6737,6772,6778,7706,9111,9246,9636,9641,10475,23586,64343,81844	IRF1,MYD88,NFKB2,RELB,TRIM21,STAT1,STAT6,TRIM25,NMI,UBE2L6,ISG15,IKBKE,TRIM38,DDX58,AZI2,TRIM56
12_Member	GO Biological Processes	GO:0032479	regulation of type I interferon production	-7.58075	-5.30446	15/126	3659,4615,4791,5971,6737,6772,6778,7706,9111,9246,9636,9641,10475,23586,81844	IRF1,MYD88,NFKB2,RELB,TRIM21,STAT1,STAT6,TRIM25,NMI,UBE2L6,ISG15,IKBKE,TRIM38,DDX58,TRIM56
12_Member	GO Biological Processes	GO:0032608	interferon-beta production	-3.38326	-1.60263	6/50	3659,5971,9111,10475,23586,81844	IRF1,RELB,NMI,TRIM38,DDX58,TRIM56
12_Member	GO Biological Processes	GO:0032648	regulation of interferon-beta production	-2.62126	-1.0324	5/48	3659,5971,9111,10475,23586	IRF1,RELB,NMI,TRIM38,DDX58
12_Member	GO Biological Processes	GO:0032607	interferon-alpha production	-2.57885	-1.00153	4/30	6772,9111,23586,64343	STAT1,NMI,DDX58,AZI2
12_Member	GO Biological Processes	GO:0032481	positive regulation of type I interferon production	-2.40113	-0.880884	6/77	3659,4615,4791,6772,6778,23586	IRF1,MYD88,NFKB2,STAT1,STAT6,DDX58
12_Member	GO Biological Processes	GO:0032647	regulation of interferon-alpha production	-1.77197	-0.418861	3/28	6772,9111,23586	STAT1,NMI,DDX58
13_Summary	GO Biological Processes	GO:0051603	proteolysis involved in cellular protein catabolic process	-7.97389	-5.6764	39/718	267,1191,1512,1520,1649,2932,3300,3303,3429,5371,5696,5698,5720,5721,6386,6478,7314,7706,8237,8878,9246,9636,10475,10616,11060,11274,23327,23352,54894,55031,55230,57448,57558,57674,59342,81502,84669,93974,151636,3949,6737,9111,55008,81844,84875,1917,3156,7076	AMFR,CLU,CTSH,CTSS,DDIT3,GSK3B,DNAJB2,HSPA1A,IFI27,PML,PSMB8,PSMB9,PSME1,PSME2,SDCBP,SIAH2,UBB,TRIM25,USP11,SQSTM1,UBE2L6,ISG15,TRIM38,RBCK1,WWP2,USP18,NEDD4L,UBR4,RNF43,USP47,USP40,BIRC6,USP35,RNF213,SCPEP1,HM13,USP32,ATP5IF1,DTX3L,LDLR,TRIM21,NMI,HERC6,TRIM56,PARP10,EEF1A2,HMGCR,TIMP1
13_Member	GO Biological Processes	GO:0051603	proteolysis involved in cellular protein catabolic process	-7.97389	-5.6764	39/718	267,1191,1512,1520,1649,2932,3300,3303,3429,5371,5696,5698,5720,5721,6386,6478,7314,7706,8237,8878,9246,9636,10475,10616,11060,11274,23327,23352,54894,55031,55230,57448,57558,57674,59342,81502,84669,93974,151636	AMFR,CLU,CTSH,CTSS,DDIT3,GSK3B,DNAJB2,HSPA1A,IFI27,PML,PSMB8,PSMB9,PSME1,PSME2,SDCBP,SIAH2,UBB,TRIM25,USP11,SQSTM1,UBE2L6,ISG15,TRIM38,RBCK1,WWP2,USP18,NEDD4L,UBR4,RNF43,USP47,USP40,BIRC6,USP35,RNF213,SCPEP1,HM13,USP32,ATP5IF1,DTX3L
13_Member	GO Biological Processes	GO:0044257	cellular protein catabolic process	-7.58666	-5.30446	40/773	267,1191,1512,1520,1649,2932,3300,3303,3429,3949,5371,5696,5698,5720,5721,6386,6478,7314,7706,8237,8878,9246,9636,10475,10616,11060,11274,23327,23352,54894,55031,55230,57448,57558,57674,59342,81502,84669,93974,151636	AMFR,CLU,CTSH,CTSS,DDIT3,GSK3B,DNAJB2,HSPA1A,IFI27,LDLR,PML,PSMB8,PSMB9,PSME1,PSME2,SDCBP,SIAH2,UBB,TRIM25,USP11,SQSTM1,UBE2L6,ISG15,TRIM38,RBCK1,WWP2,USP18,NEDD4L,UBR4,RNF43,USP47,USP40,BIRC6,USP35,RNF213,SCPEP1,HM13,USP32,ATP5IF1,DTX3L
13_Member	GO Biological Processes	GO:0019941	modification-dependent protein catabolic process	-6.96645	-4.72492	34/629	267,1191,1649,2932,3300,3303,3429,5371,5696,5698,5720,5721,6386,6478,7314,7706,8237,8878,9246,9636,10475,10616,11060,11274,23327,23352,54894,55031,55230,57448,57558,57674,84669,151636	AMFR,CLU,DDIT3,GSK3B,DNAJB2,HSPA1A,IFI27,PML,PSMB8,PSMB9,PSME1,PSME2,SDCBP,SIAH2,UBB,TRIM25,USP11,SQSTM1,UBE2L6,ISG15,TRIM38,RBCK1,WWP2,USP18,NEDD4L,UBR4,RNF43,USP47,USP40,BIRC6,USP35,RNF213,USP32,DTX3L
13_Member	GO Biological Processes	GO:0043632	modification-dependent macromolecule catabolic process	-6.78957	-4.56672	34/640	267,1191,1649,2932,3300,3303,3429,5371,5696,5698,5720,5721,6386,6478,7314,7706,8237,8878,9246,9636,10475,10616,11060,11274,23327,23352,54894,55031,55230,57448,57558,57674,84669,151636	AMFR,CLU,DDIT3,GSK3B,DNAJB2,HSPA1A,IFI27,PML,PSMB8,PSMB9,PSME1,PSME2,SDCBP,SIAH2,UBB,TRIM25,USP11,SQSTM1,UBE2L6,ISG15,TRIM38,RBCK1,WWP2,USP18,NEDD4L,UBR4,RNF43,USP47,USP40,BIRC6,USP35,RNF213,USP32,DTX3L
13_Member	GO Biological Processes	GO:0006511	ubiquitin-dependent protein catabolic process	-6.57674	-4.3718	33/623	267,1191,1649,2932,3300,3303,3429,5371,5696,5698,5720,5721,6386,6478,7314,7706,8237,8878,9246,10475,10616,11060,11274,23327,23352,54894,55031,55230,57448,57558,57674,84669,151636	AMFR,CLU,DDIT3,GSK3B,DNAJB2,HSPA1A,IFI27,PML,PSMB8,PSMB9,PSME1,PSME2,SDCBP,SIAH2,UBB,TRIM25,USP11,SQSTM1,UBE2L6,TRIM38,RBCK1,WWP2,USP18,NEDD4L,UBR4,RNF43,USP47,USP40,BIRC6,USP35,RNF213,USP32,DTX3L
13_Member	GO Biological Processes	GO:0000209	protein polyubiquitination	-4.89098	-2.84876	19/310	267,3429,5696,5698,5720,5721,6478,6737,7314,9111,10475,10616,11060,23327,55008,57674,81844,84875,151636	AMFR,IFI27,PSMB8,PSMB9,PSME1,PSME2,SIAH2,TRIM21,UBB,NMI,TRIM38,RBCK1,WWP2,NEDD4L,HERC6,RNF213,TRIM56,PARP10,DTX3L
13_Member	GO Biological Processes	GO:0043161	proteasome-mediated ubiquitin-dependent protein catabolic process	-3.59391	-1.76625	20/420	267,1191,1649,2932,3300,3303,3429,5371,5696,5698,5720,5721,6386,6478,7314,7706,10475,10616,11060,23327	AMFR,CLU,DDIT3,GSK3B,DNAJB2,HSPA1A,IFI27,PML,PSMB8,PSMB9,PSME1,PSME2,SDCBP,SIAH2,UBB,TRIM25,TRIM38,RBCK1,WWP2,NEDD4L
13_Member	GO Biological Processes	GO:0010498	proteasomal protein catabolic process	-3.29248	-1.52166	21/477	267,1191,1649,2932,3300,3303,3429,5371,5696,5698,5720,5721,6386,6478,7314,7706,10475,10616,11060,23327,81502	AMFR,CLU,DDIT3,GSK3B,DNAJB2,HSPA1A,IFI27,PML,PSMB8,PSMB9,PSME1,PSME2,SDCBP,SIAH2,UBB,TRIM25,TRIM38,RBCK1,WWP2,NEDD4L,HM13
13_Member	GO Biological Processes	GO:0042176	regulation of protein catabolic process	-2.44029	-0.90717	16/381	1191,1917,2932,3156,3300,3303,3949,5371,5720,5721,6386,7076,7314,11060,23327,93974	CLU,EEF1A2,GSK3B,HMGCR,DNAJB2,HSPA1A,LDLR,PML,PSME1,PSME2,SDCBP,TIMP1,UBB,WWP2,NEDD4L,ATP5IF1
13_Member	GO Biological Processes	GO:1903362	regulation of cellular protein catabolic process	-2.0143	-0.588968	11/247	1191,2932,3300,3303,3949,5371,5720,5721,6386,7314,93974	CLU,GSK3B,DNAJB2,HSPA1A,LDLR,PML,PSME1,PSME2,SDCBP,UBB,ATP5IF1
13_Member	GO Biological Processes	GO:1903050	regulation of proteolysis involved in cellular protein catabolic process	-1.99888	-0.582916	10/215	1191,2932,3300,3303,5371,5720,5721,6386,7314,93974	CLU,GSK3B,DNAJB2,HSPA1A,PML,PSME1,PSME2,SDCBP,UBB,ATP5IF1
13_Member	GO Biological Processes	GO:0061136	regulation of proteasomal protein catabolic process	-1.555	-0.275592	8/183	1191,2932,3300,3303,5720,5721,6386,7314	CLU,GSK3B,DNAJB2,HSPA1A,PSME1,PSME2,SDCBP,UBB
14_Summary	GO Biological Processes	GO:0002683	negative regulation of immune system process	-6.80857	-4.58112	28/463	103,246,684,961,1997,2064,2633,2852,3133,3659,3949,3965,4277,4792,6385,6778,8365,9111,10385,10475,10906,23098,25939,54625,55080,56477,79679,80149,215,9021	ADAR,ALOX15,BST2,CD47,ELF1,ERBB2,GBP1,GPER1,HLA-E,IRF1,LDLR,LGALS9,MICB,NFKBIA,SDC4,STAT6,H4C8,NMI,BTN2A2,TRIM38,TRAFD1,SARM1,SAMHD1,PARP14,TAPBPL,CCL28,VTCN1,ZC3H12A,ABCD1,SOCS3
14_Member	GO Biological Processes	GO:0002683	negative regulation of immune system process	-6.80857	-4.58112	28/463	103,246,684,961,1997,2064,2633,2852,3133,3659,3949,3965,4277,4792,6385,6778,8365,9111,10385,10475,10906,23098,25939,54625,55080,56477,79679,80149	ADAR,ALOX15,BST2,CD47,ELF1,ERBB2,GBP1,GPER1,HLA-E,IRF1,LDLR,LGALS9,MICB,NFKBIA,SDC4,STAT6,H4C8,NMI,BTN2A2,TRIM38,TRAFD1,SARM1,SAMHD1,PARP14,TAPBPL,CCL28,VTCN1,ZC3H12A
14_Member	GO Biological Processes	GO:0045824	negative regulation of innate immune response	-3.83083	-1.94412	7/59	103,3133,3965,9111,10906,25939,54625	ADAR,HLA-E,LGALS9,NMI,TRAFD1,SAMHD1,PARP14
14_Member	GO Biological Processes	GO:0050777	negative regulation of immune response	-3.73531	-1.86918	11/150	103,246,684,3133,3965,6778,9111,10906,25939,54625,80149	ADAR,ALOX15,BST2,HLA-E,LGALS9,STAT6,NMI,TRAFD1,SAMHD1,PARP14,ZC3H12A
14_Member	GO Biological Processes	GO:0031348	negative regulation of defense response	-3.55579	-1.73903	14/239	103,215,2852,3133,3949,3965,4277,9021,9111,10475,10906,25939,54625,80149	ADAR,ABCD1,GPER1,HLA-E,LDLR,LGALS9,MICB,SOCS3,NMI,TRIM38,TRAFD1,SAMHD1,PARP14,ZC3H12A
15_Summary	GO Biological Processes	GO:0006914	autophagy	-6.59551	-4.38616	29/503	523,527,823,1191,1649,1917,2081,2932,6279,6280,6720,6737,8878,9114,9531,10133,10346,11043,23130,26353,55062,55332,57617,79837,80149,81876,93974,116442,155066,215,3300,3303,3949,4343,5261,56829,151636,221662,11060,23327	ATP6V1A,ATP6V0C,CAPN1,CLU,DDIT3,EEF1A2,ERN1,GSK3B,S100A8,S100A9,SREBF1,TRIM21,SQSTM1,ATP6V0D1,BAG3,OPTN,TRIM22,MID2,ATG2A,HSPB8,WIPI1,DRAM1,VPS18,PIP4K2C,ZC3H12A,RAB1B,ATP5IF1,RAB39B,ATP6V0E2,ABCD1,DNAJB2,HSPA1A,LDLR,MOV10,PHKG2,ZC3HAV1,DTX3L,RBM24,WWP2,NEDD4L
15_Member	GO Biological Processes	GO:0006914	autophagy	-6.59551	-4.38616	29/503	523,527,823,1191,1649,1917,2081,2932,6279,6280,6720,6737,8878,9114,9531,10133,10346,11043,23130,26353,55062,55332,57617,79837,80149,81876,93974,116442,155066	ATP6V1A,ATP6V0C,CAPN1,CLU,DDIT3,EEF1A2,ERN1,GSK3B,S100A8,S100A9,SREBF1,TRIM21,SQSTM1,ATP6V0D1,BAG3,OPTN,TRIM22,MID2,ATG2A,HSPB8,WIPI1,DRAM1,VPS18,PIP4K2C,ZC3H12A,RAB1B,ATP5IF1,RAB39B,ATP6V0E2
15_Member	GO Biological Processes	GO:0061919	process utilizing autophagic mechanism	-6.59551	-4.38616	29/503	523,527,823,1191,1649,1917,2081,2932,6279,6280,6720,6737,8878,9114,9531,10133,10346,11043,23130,26353,55062,55332,57617,79837,80149,81876,93974,116442,155066	ATP6V1A,ATP6V0C,CAPN1,CLU,DDIT3,EEF1A2,ERN1,GSK3B,S100A8,S100A9,SREBF1,TRIM21,SQSTM1,ATP6V0D1,BAG3,OPTN,TRIM22,MID2,ATG2A,HSPB8,WIPI1,DRAM1,VPS18,PIP4K2C,ZC3H12A,RAB1B,ATP5IF1,RAB39B,ATP6V0E2
15_Member	GO Biological Processes	GO:0010506	regulation of autophagy	-6.17233	-4.03245	22/330	523,527,823,1649,1917,2081,2932,6720,6737,9114,9531,10133,10346,11043,26353,55332,79837,80149,81876,93974,116442,155066	ATP6V1A,ATP6V0C,CAPN1,DDIT3,EEF1A2,ERN1,GSK3B,SREBF1,TRIM21,ATP6V0D1,BAG3,OPTN,TRIM22,MID2,HSPB8,DRAM1,PIP4K2C,ZC3H12A,RAB1B,ATP5IF1,RAB39B,ATP6V0E2
15_Member	GO Biological Processes	GO:0031331	positive regulation of cellular catabolic process	-4.46718	-2.48932	20/362	215,1191,2932,3300,3303,3949,4343,5261,6737,9531,10133,10346,11043,26353,56829,79837,80149,93974,151636,221662	ABCD1,CLU,GSK3B,DNAJB2,HSPA1A,LDLR,MOV10,PHKG2,TRIM21,BAG3,OPTN,TRIM22,MID2,HSPB8,ZC3HAV1,PIP4K2C,ZC3H12A,ATP5IF1,DTX3L,RBM24
15_Member	GO Biological Processes	GO:0009896	positive regulation of catabolic process	-4.44031	-2.46504	22/424	215,1191,2932,3300,3303,3949,4343,5261,6737,9531,10133,10346,11043,11060,23327,26353,56829,79837,80149,93974,151636,221662	ABCD1,CLU,GSK3B,DNAJB2,HSPA1A,LDLR,MOV10,PHKG2,TRIM21,BAG3,OPTN,TRIM22,MID2,WWP2,NEDD4L,HSPB8,ZC3HAV1,PIP4K2C,ZC3H12A,ATP5IF1,DTX3L,RBM24
15_Member	GO Biological Processes	GO:0010508	positive regulation of autophagy	-3.9912	-2.08509	10/117	2932,6737,9531,10133,10346,11043,26353,79837,80149,93974	GSK3B,TRIM21,BAG3,OPTN,TRIM22,MID2,HSPB8,PIP4K2C,ZC3H12A,ATP5IF1
15_Member	GO Biological Processes	GO:0016241	regulation of macroautophagy	-3.2472	-1.49532	11/171	523,527,823,2081,9114,9531,10133,26353,79837,81876,155066	ATP6V1A,ATP6V0C,CAPN1,ERN1,ATP6V0D1,BAG3,OPTN,HSPB8,PIP4K2C,RAB1B,ATP6V0E2
15_Member	GO Biological Processes	GO:0016236	macroautophagy	-2.60363	-1.0211	14/300	523,527,823,2081,8878,9114,9531,10133,23130,26353,55062,79837,81876,155066	ATP6V1A,ATP6V0C,CAPN1,ERN1,SQSTM1,ATP6V0D1,BAG3,OPTN,ATG2A,HSPB8,WIPI1,PIP4K2C,RAB1B,ATP6V0E2
16_Summary	GO Biological Processes	GO:0097193	intrinsic apoptotic signaling pathway	-6.52921	-4.32863	21/289	837,1191,1649,2081,2537,2907,3301,3303,4582,5034,5371,6279,6280,6648,7314,9641,10525,10962,23645,51246,55031,215,567,573,2932,3156,3638,3776,3965,6386,8870,9531,9611,10808,23542,26353,80149,83666,84309,151636,2668,3383,6478,8743,57448	CASP4,CLU,DDIT3,ERN1,IFI6,GRINA,DNAJA1,HSPA1A,MUC1,P4HB,PML,S100A8,S100A9,SOD2,UBB,IKBKE,HYOU1,MLLT11,PPP1R15A,SHISA5,USP47,ABCD1,B2M,BAG1,GSK3B,HMGCR,INSIG1,KCNK2,LGALS9,SDCBP,IER3,BAG3,NCOR1,HSPH1,MAPK8IP2,HSPB8,ZC3H12A,PARP9,NUDT16L1,DTX3L,GDNF,ICAM1,SIAH2,TNFSF10,BIRC6
16_Member	GO Biological Processes	GO:0097193	intrinsic apoptotic signaling pathway	-6.52921	-4.32863	21/289	837,1191,1649,2081,2537,2907,3301,3303,4582,5034,5371,6279,6280,6648,7314,9641,10525,10962,23645,51246,55031	CASP4,CLU,DDIT3,ERN1,IFI6,GRINA,DNAJA1,HSPA1A,MUC1,P4HB,PML,S100A8,S100A9,SOD2,UBB,IKBKE,HYOU1,MLLT11,PPP1R15A,SHISA5,USP47
16_Member	GO Biological Processes	GO:2001242	regulation of intrinsic apoptotic signaling pathway	-4.63653	-2.6178	13/165	1191,1649,2907,3301,3303,4582,5034,6279,6280,6648,7314,10525,55031	CLU,DDIT3,GRINA,DNAJA1,HSPA1A,MUC1,P4HB,S100A8,S100A9,SOD2,UBB,HYOU1,USP47
16_Member	GO Biological Processes	GO:0070059	intrinsic apoptotic signaling pathway in response to endoplasmic reticulum stress	-4.57082	-2.56615	8/62	837,1649,2081,2907,3303,5371,10525,23645	CASP4,DDIT3,ERN1,GRINA,HSPA1A,PML,HYOU1,PPP1R15A
16_Member	GO Biological Processes	GO:0080135	regulation of cellular response to stress	-4.469	-2.48932	32/749	215,567,573,1191,1649,2081,2907,2932,3156,3301,3303,3638,3776,3965,4582,5034,5371,6386,6648,8870,9531,9611,10525,10808,23542,23645,26353,55031,80149,83666,84309,151636	ABCD1,B2M,BAG1,CLU,DDIT3,ERN1,GRINA,GSK3B,HMGCR,DNAJA1,HSPA1A,INSIG1,KCNK2,LGALS9,MUC1,P4HB,PML,SDCBP,SOD2,IER3,BAG3,NCOR1,HYOU1,HSPH1,MAPK8IP2,PPP1R15A,HSPB8,USP47,ZC3H12A,PARP9,NUDT16L1,DTX3L
16_Member	GO Biological Processes	GO:2001234	negative regulation of apoptotic signaling pathway	-4.28901	-2.33147	15/230	1191,2537,2668,2907,3301,3303,3383,4582,6478,6648,8743,10525,23542,55031,57448	CLU,IFI6,GDNF,GRINA,DNAJA1,HSPA1A,ICAM1,MUC1,SIAH2,SOD2,TNFSF10,HYOU1,MAPK8IP2,USP47,BIRC6
16_Member	GO Biological Processes	GO:2001243	negative regulation of intrinsic apoptotic signaling pathway	-3.16834	-1.44198	8/98	1191,2907,3301,3303,4582,6648,10525,55031	CLU,GRINA,DNAJA1,HSPA1A,MUC1,SOD2,HYOU1,USP47
16_Member	GO Biological Processes	GO:1905897	regulation of response to endoplasmic reticulum stress	-2.88909	-1.22759	7/84	1191,1649,2081,2907,3303,10525,23645	CLU,DDIT3,ERN1,GRINA,HSPA1A,HYOU1,PPP1R15A
16_Member	GO Biological Processes	GO:1903573	negative regulation of response to endoplasmic reticulum stress	-2.79132	-1.16065	5/44	1191,2907,3303,10525,23645	CLU,GRINA,HSPA1A,HYOU1,PPP1R15A
16_Member	GO Biological Processes	GO:1902235	regulation of endoplasmic reticulum stress-induced intrinsic apoptotic signaling pathway	-2.4742	-0.930677	4/32	1649,2907,3303,10525	DDIT3,GRINA,HSPA1A,HYOU1
16_Member	GO Biological Processes	GO:1902236	negative regulation of endoplasmic reticulum stress-induced intrinsic apoptotic signaling pathway	-2.18047	-0.711484	3/20	2907,3303,10525	GRINA,HSPA1A,HYOU1
17_Summary	GO Biological Processes	GO:0051259	protein complex oligomerization	-6.48984	-4.29447	31/568	267,309,330,389,567,1191,1649,2040,2203,2633,2878,3156,3728,3934,4257,6281,6648,6737,8357,8365,8878,9641,10346,23475,25939,57674,80149,81502,93974,114904,200958	AMFR,ANXA6,BIRC3,RHOC,B2M,CLU,DDIT3,STOM,FBP1,GBP1,GPX3,HMGCR,JUP,LCN2,MGST1,S100A10,SOD2,TRIM21,H3C10,H4C8,SQSTM1,IKBKE,TRIM22,QPRT,SAMHD1,RNF213,ZC3H12A,HM13,ATP5IF1,C1QTNF6,MUC20
17_Member	GO Biological Processes	GO:0051259	protein complex oligomerization	-6.48984	-4.29447	31/568	267,309,330,389,567,1191,1649,2040,2203,2633,2878,3156,3728,3934,4257,6281,6648,6737,8357,8365,8878,9641,10346,23475,25939,57674,80149,81502,93974,114904,200958	AMFR,ANXA6,BIRC3,RHOC,B2M,CLU,DDIT3,STOM,FBP1,GBP1,GPX3,HMGCR,JUP,LCN2,MGST1,S100A10,SOD2,TRIM21,H3C10,H4C8,SQSTM1,IKBKE,TRIM22,QPRT,SAMHD1,RNF213,ZC3H12A,HM13,ATP5IF1,C1QTNF6,MUC20
17_Member	GO Biological Processes	GO:0051262	protein tetramerization	-3.22602	-1.47876	11/172	567,2203,2878,3156,6281,6648,8357,8365,25939,81502,93974	B2M,FBP1,GPX3,HMGCR,S100A10,SOD2,H3C10,H4C8,SAMHD1,HM13,ATP5IF1
17_Member	GO Biological Processes	GO:0051260	protein homooligomerization	-3.22196	-1.47623	17/351	309,389,567,1191,2040,2203,2633,2878,3934,4257,6648,9641,25939,57674,81502,93974,200958	ANXA6,RHOC,B2M,CLU,STOM,FBP1,GBP1,GPX3,LCN2,MGST1,SOD2,IKBKE,SAMHD1,RNF213,HM13,ATP5IF1,MUC20
17_Member	GO Biological Processes	GO:0051289	protein homotetramerization	-2.60715	-1.02357	7/94	567,2203,2878,6648,25939,81502,93974	B2M,FBP1,GPX3,SOD2,SAMHD1,HM13,ATP5IF1
18_Summary	GO Biological Processes	GO:0060700	regulation of ribonuclease activity	-6.48221	-4.29447	5/9	3303,4938,4939,4940,8638	HSPA1A,OAS1,OAS2,OAS3,OASL
18_Member	GO Biological Processes	GO:0060700	regulation of ribonuclease activity	-6.48221	-4.29447	5/9	3303,4938,4939,4940,8638	HSPA1A,OAS1,OAS2,OAS3,OASL
18_Member	GO Biological Processes	GO:0032069	regulation of nuclease activity	-4.25338	-2.30565	5/22	3303,4938,4939,4940,8638	HSPA1A,OAS1,OAS2,OAS3,OASL
19_Summary	GO Biological Processes	GO:0006986	response to unfolded protein	-6.3956	-4.22033	16/176	267,1649,2081,3300,3301,3303,5526,9114,9531,10133,10525,10808,23645,26353,55062,64061,1191,246,837,2907,2932,5034,5371,7706,81502	AMFR,DDIT3,ERN1,DNAJB2,DNAJA1,HSPA1A,PPP2R5B,ATP6V0D1,BAG3,OPTN,HYOU1,HSPH1,PPP1R15A,HSPB8,WIPI1,TSPYL2,CLU,ALOX15,CASP4,GRINA,GSK3B,P4HB,PML,TRIM25,HM13
19_Member	GO Biological Processes	GO:0006986	response to unfolded protein	-6.3956	-4.22033	16/176	267,1649,2081,3300,3301,3303,5526,9114,9531,10133,10525,10808,23645,26353,55062,64061	AMFR,DDIT3,ERN1,DNAJB2,DNAJA1,HSPA1A,PPP2R5B,ATP6V0D1,BAG3,OPTN,HYOU1,HSPH1,PPP1R15A,HSPB8,WIPI1,TSPYL2
19_Member	GO Biological Processes	GO:0035966	response to topologically incorrect protein	-6.37093	-4.20378	17/199	267,1191,1649,2081,3300,3301,3303,5526,9114,9531,10133,10525,10808,23645,26353,55062,64061	AMFR,CLU,DDIT3,ERN1,DNAJB2,DNAJA1,HSPA1A,PPP2R5B,ATP6V0D1,BAG3,OPTN,HYOU1,HSPH1,PPP1R15A,HSPB8,WIPI1,TSPYL2
19_Member	GO Biological Processes	GO:0034976	response to endoplasmic reticulum stress	-6.0096	-3.88091	20/285	246,267,837,1191,1649,2081,2907,2932,3300,3303,5034,5371,5526,7706,9114,10525,23645,55062,64061,81502	ALOX15,AMFR,CASP4,CLU,DDIT3,ERN1,GRINA,GSK3B,DNAJB2,HSPA1A,P4HB,PML,PPP2R5B,TRIM25,ATP6V0D1,HYOU1,PPP1R15A,WIPI1,TSPYL2,HM13
19_Member	GO Biological Processes	GO:0034620	cellular response to unfolded protein	-5.41148	-3.32817	13/140	267,1649,2081,3303,5526,9114,9531,10133,10525,23645,26353,55062,64061	AMFR,DDIT3,ERN1,HSPA1A,PPP2R5B,ATP6V0D1,BAG3,OPTN,HYOU1,PPP1R15A,HSPB8,WIPI1,TSPYL2
19_Member	GO Biological Processes	GO:0035967	cellular response to topologically incorrect protein	-4.74985	-2.71954	13/161	267,1649,2081,3303,5526,9114,9531,10133,10525,23645,26353,55062,64061	AMFR,DDIT3,ERN1,HSPA1A,PPP2R5B,ATP6V0D1,BAG3,OPTN,HYOU1,PPP1R15A,HSPB8,WIPI1,TSPYL2
19_Member	GO Biological Processes	GO:0030968	endoplasmic reticulum unfolded protein response	-3.20049	-1.46231	9/121	267,1649,2081,5526,9114,10525,23645,55062,64061	AMFR,DDIT3,ERN1,PPP2R5B,ATP6V0D1,HYOU1,PPP1R15A,WIPI1,TSPYL2
19_Member	GO Biological Processes	GO:0036498	IRE1-mediated unfolded protein response	-2.80911	-1.17186	6/64	2081,5526,9114,10525,55062,64061	ERN1,PPP2R5B,ATP6V0D1,HYOU1,WIPI1,TSPYL2
20_Summary	GO Biological Processes	GO:0097191	extrinsic apoptotic signaling pathway	-6.3151	-4.15591	18/224	2537,2668,2852,2932,3303,3383,3429,3934,5062,5371,6478,6672,8743,9531,10616,10962,27018,57448	IFI6,GDNF,GPER1,GSK3B,HSPA1A,ICAM1,IFI27,LCN2,PAK2,PML,SIAH2,SP100,TNFSF10,BAG3,RBCK1,MLLT11,BEX3,BIRC6
20_Member	GO Biological Processes	GO:0097191	extrinsic apoptotic signaling pathway	-6.3151	-4.15591	18/224	2537,2668,2852,2932,3303,3383,3429,3934,5062,5371,6478,6672,8743,9531,10616,10962,27018,57448	IFI6,GDNF,GPER1,GSK3B,HSPA1A,ICAM1,IFI27,LCN2,PAK2,PML,SIAH2,SP100,TNFSF10,BAG3,RBCK1,MLLT11,BEX3,BIRC6
20_Member	GO Biological Processes	GO:2001236	regulation of extrinsic apoptotic signaling pathway	-4.25041	-2.3051	12/155	2537,2668,2852,3303,3383,5062,5371,6478,6672,8743,10616,57448	IFI6,GDNF,GPER1,HSPA1A,ICAM1,PAK2,PML,SIAH2,SP100,TNFSF10,RBCK1,BIRC6
20_Member	GO Biological Processes	GO:0038034	signal transduction in absence of ligand	-2.54692	-0.983652	6/72	2537,2668,2932,3303,3934,9531	IFI6,GDNF,GSK3B,HSPA1A,LCN2,BAG3
20_Member	GO Biological Processes	GO:0097192	extrinsic apoptotic signaling pathway in absence of ligand	-2.54692	-0.983652	6/72	2537,2668,2932,3303,3934,9531	IFI6,GDNF,GSK3B,HSPA1A,LCN2,BAG3
20_Member	GO Biological Processes	GO:2001237	negative regulation of extrinsic apoptotic signaling pathway	-2.36196	-0.848676	7/104	2537,2668,3303,3383,6478,8743,57448	IFI6,GDNF,HSPA1A,ICAM1,SIAH2,TNFSF10,BIRC6
20_Member	GO Biological Processes	GO:1901099	negative regulation of signal transduction in absence of ligand	-1.48313	-0.225072	3/36	2537,2668,3303	IFI6,GDNF,HSPA1A
20_Member	GO Biological Processes	GO:2001240	negative regulation of extrinsic apoptotic signaling pathway in absence of ligand	-1.48313	-0.225072	3/36	2537,2668,3303	IFI6,GDNF,HSPA1A

## Sheet: Annotation_downregulated_genes
Input ID	Gene ID	Type	Tax ID	Homologene Gene ID	Homologene Gene Tax ID	GO:0000280 nuclear division	GO:0000226 microtubule cytoskeleton organ	GO:0010564 regulation of cell cycle proce	GO:0007088 regulation of mitotic nuclear	GO:0051640 organelle localization	GO:0022616 DNA strand elongation	GO:0071103 DNA conformation change	GO:0051321 meiotic cell cycle	GO:0006281 DNA repair	GO:0000281 mitotic cytokinesis	GO:0001889 liver development	GO:0000904 cell morphogenesis involved in	GO:0034330 cell junction organization	GO:0072657 protein localization to membra	GO:0090068 positive regulation of cell cy	GO:0048589 developmental growth	GO:0045786 negative regulation of cell cy	GO:0051782 negative regulation of cell di	GO:0044843 cell cycle G1/S phase transiti	GO:0009792 embryo development ending in b	GO:0051383 kinetochore organization	GO:0031109 microtubule polymerization or	GO:0048545 response to steroid hormone	GO:0007386 compartment pattern specificat	GO:2001236 regulation of extrinsic apopto	GO:0070848 response to growth factor	GO:0051642 centrosome localization	GO:0071478 cellular response to radiation	GO:0140056 organelle localization by memb	GO:0080135 regulation of cellular respons	GO:0046578 regulation of Ras protein sign	GO:0097435 supramolecular fiber organizat	GO:0061061 muscle structure development	GO:0042558 pteridine-containing compound	GO:0042176 regulation of protein cataboli	GO:0045216 cell-cell junction organizatio	GO:0006265 DNA topological change	GO:0045647 negative regulation of erythro	GO:1903431 positive regulation of cell ma	GO:0022411 cellular component disassembly
DSCAM-AS1	100506492	symbol	H. sapiens	100506492	H. sapiens	0.0	0.0	0.0	0.0	0.0	0.0	0.0	0.0	0.0	0.0	0.0	0.0	0.0	0.0	0.0	0.0	0.0	0.0	0.0	0.0	0.0	0.0	0.0	0.0	0.0	0.0	0.0	0.0	0.0	0.0	0.0	0.0	0.0	0.0	0.0	0.0	0.0	0.0	0.0	0.0
MAGI1	9223	symbol	H. sapiens	9223	H. sapiens	0.0	0.0	0.0	0.0	0.0	0.0	0.0	0.0	0.0	0.0	0.0	0.0	0.0	0.0	0.0	0.0	0.0	0.0	0.0	0.0	0.0	0.0	0.0	0.0	0.0	0.0	0.0	0.0	0.0	0.0	0.0	0.0	0.0	0.0	0.0	0.0	0.0	0.0	0.0	0.0
IDS	3423	symbol	H. sapiens	3423	H. sapiens	0.0	0.0	0.0	0.0	0.0	0.0	0.0	0.0	0.0	0.0	0.0	0.0	0.0	0.0	0.0	0.0	0.0	0.0	0.0	0.0	0.0	0.0	0.0	0.0	0.0	0.0	0.0	0.0	0.0	0.0	0.0	0.0	0.0	0.0	0.0	0.0	0.0	0.0	0.0	0.0
PAXBP1	94104	symbol	H. sapiens	94104	H. sapiens	0.0	1.0	0.0	1.0	0.0	0.0	0.0	0.0	0.0	0.0	0.0	0.0	0.0	0.0	0.0	1.0	0.0	0.0	0.0	0.0	0.0	0.0	0.0	0.0	0.0	0.0	0.0	0.0	0.0	0.0	0.0	0.0	1.0	0.0	0.0	0.0	0.0	0.0	0.0	0.0
PLCB1	23236	symbol	H. sapiens	23236	H. sapiens	1.0	1.0	1.0	1.0	0.0	0.0	0.0	1.0	0.0	0.0	0.0	0.0	1.0	0.0	1.0	1.0	0.0	0.0	1.0	0.0	0.0	0.0	1.0	0.0	0.0	0.0	0.0	0.0	0.0	1.0	1.0	0.0	1.0	0.0	0.0	0.0	0.0	0.0	0.0	0.0
FAM168A	23201	symbol	H. sapiens	23201	H. sapiens	0.0	0.0	0.0	0.0	0.0	1.0	0.0	0.0	1.0	0.0	0.0	0.0	0.0	0.0	0.0	0.0	0.0	0.0	0.0	0.0	0.0	0.0	0.0	0.0	0.0	0.0	0.0	0.0	0.0	1.0	0.0	0.0	0.0	0.0	0.0	0.0	0.0	0.0	0.0	0.0
SPIDR	23514	symbol	H. sapiens	23514	H. sapiens	0.0	1.0	0.0	0.0	0.0	1.0	0.0	0.0	1.0	0.0	0.0	0.0	0.0	1.0	0.0	0.0	0.0	0.0	0.0	0.0	0.0	1.0	1.0	0.0	0.0	0.0	0.0	1.0	0.0	1.0	0.0	0.0	0.0	0.0	0.0	0.0	0.0	0.0	0.0	0.0
AFDN	4301	symbol	H. sapiens	4301	H. sapiens	0.0	0.0	0.0	0.0	0.0	0.0	0.0	0.0	0.0	0.0	0.0	0.0	1.0	1.0	0.0	0.0	0.0	0.0	0.0	1.0	0.0	0.0	0.0	0.0	0.0	0.0	0.0	0.0	0.0	0.0	1.0	0.0	0.0	0.0	0.0	1.0	0.0	0.0	0.0	0.0
RET	5979	symbol	H. sapiens	5979	H. sapiens	0.0	0.0	0.0	0.0	0.0	0.0	0.0	0.0	0.0	0.0	0.0	1.0	1.0	0.0	0.0	0.0	0.0	1.0	1.0	0.0	0.0	0.0	1.0	0.0	1.0	0.0	0.0	0.0	0.0	0.0	0.0	0.0	0.0	0.0	0.0	0.0	0.0	0.0	1.0	0.0
NOC3L	64318	symbol	H. sapiens	64318	H. sapiens	0.0	0.0	0.0	0.0	0.0	0.0	0.0	0.0	0.0	0.0	0.0	0.0	0.0	0.0	0.0	0.0	0.0	0.0	0.0	0.0	0.0	0.0	0.0	0.0	0.0	0.0	0.0	0.0	0.0	0.0	0.0	0.0	0.0	0.0	0.0	0.0	0.0	0.0	0.0	0.0
DLGAP5	9787	symbol	H. sapiens	9787	H. sapiens	1.0	1.0	1.0	1.0	1.0	0.0	0.0	0.0	0.0	0.0	0.0	0.0	0.0	0.0	1.0	0.0	0.0	0.0	0.0	0.0	0.0	0.0	0.0	1.0	0.0	0.0	0.0	0.0	0.0	0.0	0.0	0.0	0.0	0.0	0.0	0.0	0.0	0.0	0.0	0.0
SYTL5	94122	symbol	H. sapiens	94122	H. sapiens	0.0	0.0	0.0	0.0	0.0	0.0	0.0	0.0	0.0	0.0	0.0	0.0	0.0	0.0	0.0	0.0	0.0	0.0	0.0	0.0	0.0	0.0	0.0	0.0	0.0	0.0	0.0	0.0	0.0	0.0	0.0	0.0	0.0	0.0	0.0	0.0	0.0	0.0	0.0	0.0
OXCT1	5019	symbol	H. sapiens	5019	H. sapiens	0.0	0.0	0.0	0.0	0.0	0.0	0.0	0.0	0.0	0.0	0.0	0.0	0.0	0.0	0.0	0.0	0.0	0.0	0.0	1.0	0.0	0.0	0.0	0.0	0.0	0.0	0.0	0.0	0.0	0.0	0.0	0.0	0.0	0.0	0.0	0.0	0.0	0.0	0.0	0.0
WWOX	51741	symbol	H. sapiens	51741	H. sapiens	0.0	0.0	0.0	0.0	0.0	0.0	0.0	0.0	0.0	0.0	0.0	0.0	0.0	0.0	0.0	0.0	0.0	0.0	1.0	0.0	0.0	0.0	0.0	0.0	1.0	1.0	0.0	0.0	0.0	0.0	0.0	0.0	0.0	0.0	0.0	0.0	0.0	0.0	1.0	0.0
USP34	9736	symbol	H. sapiens	9736	H. sapiens	0.0	0.0	0.0	0.0	0.0	0.0	0.0	0.0	0.0	0.0	0.0	0.0	0.0	0.0	0.0	0.0	0.0	0.0	0.0	0.0	0.0	0.0	0.0	0.0	0.0	0.0	0.0	0.0	0.0	0.0	0.0	0.0	0.0	0.0	1.0	0.0	0.0	0.0	0.0	0.0
LTBP1	4052	symbol	H. sapiens	4052	H. sapiens	0.0	0.0	0.0	0.0	0.0	0.0	0.0	0.0	0.0	0.0	0.0	0.0	0.0	0.0	0.0	0.0	0.0	0.0	0.0	1.0	0.0	0.0	0.0	0.0	0.0	1.0	0.0	0.0	0.0	0.0	0.0	0.0	0.0	0.0	0.0	0.0	0.0	0.0	0.0	0.0
ATP11C	286410	symbol	H. sapiens	286410	H. sapiens	0.0	0.0	0.0	0.0	0.0	0.0	0.0	0.0	0.0	0.0	0.0	0.0	0.0	0.0	0.0	0.0	0.0	0.0	0.0	0.0	0.0	0.0	0.0	0.0	0.0	0.0	0.0	0.0	0.0	0.0	0.0	0.0	0.0	0.0	0.0	0.0	0.0	1.0	0.0	0.0
EPHA6	285220	symbol	H. sapiens	285220	H. sapiens	0.0	0.0	0.0	0.0	0.0	0.0	0.0	0.0	0.0	0.0	0.0	1.0	0.0	0.0	0.0	0.0	0.0	0.0	0.0	0.0	0.0	0.0	0.0	0.0	0.0	0.0	0.0	0.0	0.0	0.0	0.0	0.0	0.0	0.0	0.0	0.0	0.0	0.0	0.0	0.0
PEAK1	79834	symbol	H. sapiens	79834	H. sapiens	0.0	0.0	0.0	0.0	0.0	0.0	0.0	0.0	0.0	0.0	0.0	1.0	1.0	0.0	0.0	0.0	0.0	0.0	0.0	0.0	0.0	0.0	0.0	0.0	0.0	0.0	0.0	0.0	0.0	0.0	0.0	0.0	0.0	0.0	0.0	0.0	0.0	0.0	0.0	0.0
SHISA2	387914	symbol	H. sapiens	387914	H. sapiens	0.0	0.0	0.0	0.0	0.0	0.0	0.0	0.0	0.0	0.0	0.0	0.0	0.0	0.0	0.0	0.0	0.0	0.0	0.0	0.0	0.0	0.0	0.0	0.0	0.0	1.0	0.0	0.0	0.0	0.0	0.0	0.0	0.0	0.0	0.0	0.0	0.0	0.0	0.0	0.0
MINOS1	440574	gene_synonym	H. sapiens	440574	H. sapiens	0.0	0.0	0.0	0.0	0.0	0.0	0.0	0.0	0.0	0.0	0.0	0.0	0.0	0.0	0.0	0.0	0.0	0.0	0.0	0.0	0.0	0.0	0.0	0.0	0.0	0.0	0.0	0.0	0.0	0.0	0.0	0.0	0.0	0.0	0.0	0.0	0.0	0.0	0.0	0.0
CLSTN2	64084	symbol	H. sapiens	64084	H. sapiens	0.0	1.0	0.0	0.0	0.0	0.0	0.0	0.0	0.0	0.0	0.0	1.0	0.0	0.0	0.0	0.0	0.0	0.0	0.0	0.0	0.0	0.0	0.0	0.0	0.0	0.0	0.0	0.0	0.0	0.0	0.0	0.0	0.0	0.0	0.0	0.0	0.0	0.0	0.0	0.0
RNF4	6047	symbol	H. sapiens	6047	H. sapiens	0.0	1.0	1.0	1.0	0.0	0.0	0.0	0.0	0.0	1.0	0.0	0.0	0.0	0.0	0.0	0.0	0.0	0.0	0.0	0.0	1.0	1.0	1.0	0.0	0.0	0.0	0.0	0.0	0.0	0.0	0.0	0.0	0.0	0.0	1.0	0.0	0.0	0.0	0.0	0.0
ZFAND3	60685	symbol	H. sapiens	60685	H. sapiens	0.0	0.0	0.0	0.0	0.0	0.0	0.0	0.0	0.0	0.0	0.0	0.0	0.0	0.0	0.0	0.0	0.0	0.0	0.0	0.0	0.0	0.0	0.0	0.0	0.0	0.0	0.0	0.0	0.0	0.0	0.0	0.0	0.0	0.0	0.0	0.0	0.0	0.0	0.0	0.0
GRB2	2885	symbol	H. sapiens	2885	H. sapiens	0.0	1.0	0.0	0.0	0.0	0.0	0.0	0.0	0.0	0.0	0.0	1.0	1.0	0.0	0.0	0.0	0.0	1.0	0.0	1.0	0.0	1.0	1.0	0.0	0.0	1.0	0.0	1.0	0.0	0.0	1.0	1.0	0.0	0.0	0.0	0.0	0.0	0.0	0.0	0.0
BCL2	596	symbol	H. sapiens	596	H. sapiens	0.0	1.0	1.0	1.0	0.0	1.0	0.0	0.0	0.0	0.0	1.0	1.0	1.0	1.0	0.0	1.0	1.0	1.0	1.0	0.0	0.0	0.0	1.0	0.0	1.0	0.0	0.0	1.0	0.0	1.0	0.0	1.0	1.0	0.0	1.0	0.0	0.0	1.0	1.0	0.0
CA2	760	symbol	H. sapiens	760	H. sapiens	0.0	0.0	0.0	0.0	0.0	1.0	0.0	0.0	0.0	0.0	0.0	0.0	0.0	0.0	0.0	0.0	0.0	1.0	0.0	0.0	0.0	0.0	1.0	0.0	0.0	0.0	0.0	0.0	0.0	0.0	0.0	0.0	0.0	0.0	0.0	0.0	0.0	1.0	0.0	0.0
EBPL	84650	symbol	H. sapiens	84650	H. sapiens	0.0	0.0	0.0	0.0	0.0	0.0	0.0	0.0	0.0	0.0	0.0	0.0	0.0	0.0	0.0	0.0	0.0	0.0	0.0	0.0	0.0	0.0	0.0	0.0	0.0	0.0	0.0	0.0	0.0	0.0	0.0	0.0	0.0	0.0	0.0	0.0	0.0	0.0	0.0	0.0
WDR59	79726	symbol	H. sapiens	79726	H. sapiens	0.0	0.0	0.0	0.0	0.0	0.0	0.0	0.0	0.0	0.0	0.0	0.0	0.0	0.0	0.0	0.0	0.0	0.0	0.0	0.0	0.0	0.0	0.0	0.0	0.0	0.0	0.0	0.0	0.0	0.0	0.0	0.0	0.0	0.0	0.0	0.0	0.0	0.0	0.0	0.0
PHLPP1	23239	symbol	H. sapiens	23239	H. sapiens	0.0	0.0	0.0	0.0	0.0	0.0	0.0	0.0	0.0	0.0	0.0	0.0	0.0	0.0	0.0	0.0	0.0	0.0	0.0	0.0	0.0	0.0	0.0	0.0	0.0	0.0	0.0	0.0	0.0	1.0	0.0	0.0	0.0	0.0	0.0	0.0	0.0	0.0	0.0	0.0
SLC39A11	201266	symbol	H. sapiens	201266	H. sapiens	0.0	0.0	0.0	0.0	0.0	0.0	0.0	0.0	0.0	0.0	0.0	0.0	0.0	0.0	0.0	0.0	0.0	0.0	0.0	0.0	0.0	0.0	0.0	0.0	0.0	0.0	0.0	0.0	0.0	0.0	0.0	0.0	0.0	0.0	0.0	0.0	0.0	0.0	0.0	0.0
POLA1	5422	symbol	H. sapiens	5422	H. sapiens	0.0	0.0	1.0	0.0	0.0	1.0	0.0	0.0	1.0	0.0	0.0	0.0	0.0	0.0	0.0	0.0	0.0	0.0	1.0	0.0	0.0	0.0	0.0	0.0	0.0	0.0	0.0	1.0	0.0	0.0	0.0	0.0	0.0	0.0	0.0	0.0	0.0	0.0	0.0	0.0
ERCC6L2	375748	symbol	H. sapiens	375748	H. sapiens	0.0	0.0	0.0	0.0	0.0	0.0	0.0	0.0	1.0	0.0	0.0	0.0	0.0	0.0	0.0	0.0	0.0	0.0	0.0	0.0	0.0	0.0	0.0	0.0	0.0	0.0	0.0	0.0	0.0	0.0	0.0	0.0	0.0	0.0	0.0	0.0	0.0	0.0	0.0	0.0
WASHC4	23325	symbol	H. sapiens	23325	H. sapiens	0.0	0.0	0.0	0.0	0.0	0.0	0.0	0.0	0.0	0.0	0.0	0.0	0.0	0.0	0.0	0.0	0.0	0.0	0.0	0.0	0.0	0.0	0.0	0.0	0.0	0.0	0.0	0.0	0.0	0.0	0.0	0.0	0.0	0.0	0.0	0.0	0.0	0.0	0.0	0.0
TM4SF1	4071	symbol	H. sapiens	4071	H. sapiens	0.0	0.0	0.0	0.0	0.0	0.0	0.0	0.0	0.0	0.0	0.0	0.0	0.0	0.0	0.0	0.0	0.0	0.0	0.0	1.0	0.0	0.0	0.0	0.0	0.0	0.0	0.0	0.0	0.0	0.0	0.0	0.0	0.0	0.0	0.0	0.0	0.0	0.0	0.0	0.0
MYO10	4651	symbol	H. sapiens	4651	H. sapiens	0.0	0.0	0.0	0.0	0.0	0.0	0.0	0.0	0.0	0.0	0.0	1.0	1.0	0.0	0.0	0.0	0.0	0.0	0.0	0.0	0.0	0.0	0.0	0.0	0.0	0.0	0.0	0.0	1.0	0.0	0.0	0.0	0.0	0.0	0.0	0.0	0.0	0.0	0.0	0.0
MYO5B	4645	symbol	H. sapiens	4645	H. sapiens	0.0	0.0	0.0	0.0	0.0	0.0	0.0	0.0	0.0	0.0	0.0	0.0	0.0	0.0	0.0	0.0	0.0	0.0	0.0	0.0	0.0	0.0	0.0	0.0	0.0	0.0	0.0	0.0	0.0	0.0	0.0	0.0	0.0	0.0	0.0	0.0	0.0	0.0	0.0	0.0
RNF19A	25897	symbol	H. sapiens	25897	H. sapiens	0.0	1.0	0.0	0.0	0.0	0.0	0.0	0.0	0.0	0.0	0.0	0.0	0.0	0.0	0.0	0.0	0.0	0.0	0.0	0.0	0.0	0.0	0.0	0.0	0.0	0.0	0.0	0.0	0.0	0.0	0.0	0.0	0.0	0.0	1.0	0.0	0.0	0.0	0.0	0.0
NLN	57486	symbol	H. sapiens	57486	H. sapiens	0.0	0.0	0.0	0.0	0.0	0.0	0.0	0.0	0.0	0.0	0.0	0.0	0.0	0.0	0.0	1.0	0.0	0.0	0.0	0.0	0.0	0.0	0.0	0.0	0.0	0.0	0.0	0.0	0.0	0.0	0.0	0.0	1.0	0.0	0.0	0.0	0.0	0.0	0.0	0.0
CHMP7	91782	symbol	H. sapiens	91782	H. sapiens	1.0	0.0	1.0	0.0	1.0	0.0	0.0	0.0	0.0	1.0	0.0	0.0	0.0	0.0	0.0	0.0	0.0	0.0	0.0	0.0	0.0	0.0	0.0	0.0	0.0	0.0	0.0	0.0	0.0	0.0	0.0	0.0	0.0	0.0	0.0	0.0	0.0	0.0	0.0	1.0
METTL15	196074	symbol	H. sapiens	196074	H. sapiens	0.0	0.0	0.0	0.0	0.0	0.0	0.0	0.0	0.0	0.0	0.0	0.0	0.0	0.0	0.0	0.0	0.0	0.0	0.0	0.0	0.0	0.0	0.0	0.0	0.0	0.0	0.0	0.0	0.0	0.0	0.0	0.0	0.0	0.0	0.0	0.0	0.0	0.0	0.0	0.0
RAB3IP	117177	symbol	H. sapiens	117177	H. sapiens	0.0	0.0	0.0	0.0	1.0	0.0	0.0	0.0	0.0	0.0	0.0	0.0	0.0	1.0	0.0	0.0	0.0	0.0	0.0	0.0	0.0	0.0	0.0	0.0	0.0	0.0	0.0	0.0	1.0	0.0	0.0	0.0	0.0	0.0	0.0	0.0	0.0	0.0	0.0	0.0
RPRD1A	55197	symbol	H. sapiens	55197	H. sapiens	0.0	0.0	0.0	0.0	0.0	0.0	0.0	0.0	0.0	0.0	0.0	0.0	0.0	0.0	0.0	0.0	0.0	0.0	0.0	0.0	0.0	0.0	0.0	0.0	0.0	0.0	0.0	0.0	0.0	0.0	0.0	0.0	0.0	0.0	0.0	0.0	0.0	0.0	0.0	0.0
SCFD2	152579	symbol	H. sapiens	152579	H. sapiens	0.0	0.0	0.0	0.0	1.0	0.0	0.0	0.0	0.0	0.0	0.0	0.0	0.0	0.0	0.0	0.0	0.0	0.0	0.0	0.0	0.0	0.0	0.0	0.0	0.0	0.0	0.0	0.0	1.0	0.0	0.0	0.0	0.0	0.0	0.0	0.0	0.0	0.0	0.0	0.0
SIAE	54414	symbol	H. sapiens	54414	H. sapiens	0.0	0.0	0.0	0.0	0.0	0.0	0.0	0.0	0.0	0.0	0.0	0.0	0.0	0.0	0.0	0.0	0.0	0.0	0.0	0.0	0.0	0.0	0.0	0.0	0.0	0.0	0.0	0.0	0.0	0.0	0.0	0.0	0.0	0.0	0.0	0.0	0.0	0.0	0.0	0.0
RNF150	57484	symbol	H. sapiens	57484	H. sapiens	0.0	0.0	0.0	0.0	0.0	0.0	0.0	0.0	0.0	0.0	0.0	0.0	0.0	0.0	0.0	0.0	0.0	0.0	0.0	0.0	0.0	0.0	0.0	0.0	0.0	0.0	0.0	0.0	0.0	0.0	0.0	0.0	0.0	0.0	1.0	0.0	0.0	0.0	0.0	0.0
PRR11	55771	symbol	H. sapiens	55771	H. sapiens	0.0	0.0	0.0	0.0	0.0	0.0	0.0	0.0	0.0	0.0	0.0	0.0	0.0	0.0	0.0	0.0	1.0	0.0	0.0	0.0	0.0	0.0	0.0	0.0	0.0	0.0	0.0	0.0	0.0	0.0	0.0	0.0	0.0	0.0	0.0	0.0	0.0	0.0	0.0	0.0
FANCI	55215	symbol	H. sapiens	55215	H. sapiens	0.0	0.0	0.0	0.0	0.0	0.0	0.0	0.0	1.0	0.0	0.0	0.0	0.0	0.0	0.0	0.0	0.0	0.0	0.0	0.0	0.0	0.0	0.0	0.0	0.0	0.0	0.0	0.0	0.0	0.0	0.0	0.0	0.0	0.0	0.0	0.0	0.0	0.0	0.0	0.0
COL18A1	80781	symbol	H. sapiens	80781	H. sapiens	0.0	0.0	0.0	0.0	0.0	0.0	0.0	0.0	0.0	0.0	0.0	1.0	0.0	0.0	0.0	0.0	0.0	0.0	0.0	1.0	0.0	0.0	0.0	0.0	0.0	0.0	0.0	0.0	0.0	0.0	0.0	0.0	0.0	0.0	0.0	0.0	0.0	0.0	0.0	0.0
PHKB	5257	symbol	H. sapiens	5257	H. sapiens	0.0	0.0	0.0	0.0	0.0	0.0	0.0	0.0	0.0	0.0	0.0	0.0	0.0	0.0	0.0	0.0	0.0	0.0	0.0	0.0	0.0	0.0	0.0	0.0	0.0	0.0	0.0	0.0	0.0	0.0	0.0	0.0	0.0	0.0	0.0	0.0	0.0	0.0	0.0	0.0
COL5A1	1289	symbol	H. sapiens	1289	H. sapiens	0.0	0.0	0.0	0.0	0.0	0.0	0.0	0.0	0.0	0.0	0.0	0.0	0.0	0.0	0.0	0.0	0.0	1.0	0.0	1.0	0.0	0.0	0.0	0.0	0.0	0.0	0.0	0.0	0.0	0.0	0.0	1.0	0.0	0.0	0.0	0.0	0.0	0.0	0.0	0.0
TRIM36	55521	symbol	H. sapiens	55521	H. sapiens	1.0	1.0	0.0	0.0	0.0	0.0	0.0	0.0	0.0	1.0	0.0	0.0	0.0	0.0	0.0	0.0	0.0	0.0	0.0	0.0	0.0	0.0	0.0	0.0	0.0	0.0	0.0	0.0	0.0	0.0	0.0	0.0	0.0	0.0	1.0	0.0	0.0	0.0	0.0	0.0
DARS2	55157	symbol	H. sapiens	55157	H. sapiens	0.0	0.0	0.0	0.0	0.0	0.0	0.0	0.0	0.0	0.0	0.0	0.0	0.0	1.0	0.0	0.0	0.0	0.0	0.0	0.0	0.0	0.0	0.0	0.0	0.0	0.0	0.0	0.0	0.0	0.0	0.0	0.0	0.0	0.0	0.0	0.0	0.0	0.0	0.0	0.0
MYO1D	4642	symbol	H. sapiens	4642	H. sapiens	0.0	0.0	0.0	0.0	0.0	0.0	0.0	0.0	0.0	0.0	0.0	0.0	0.0	0.0	0.0	0.0	0.0	0.0	0.0	0.0	0.0	0.0	0.0	0.0	0.0	0.0	0.0	0.0	0.0	0.0	0.0	0.0	0.0	0.0	0.0	0.0	0.0	0.0	0.0	0.0
RBM3	5935	symbol	H. sapiens	5935	H. sapiens	0.0	0.0	0.0	0.0	0.0	0.0	0.0	0.0	0.0	0.0	0.0	0.0	0.0	1.0	0.0	0.0	0.0	0.0	0.0	0.0	0.0	0.0	0.0	0.0	0.0	0.0	0.0	0.0	0.0	0.0	0.0	0.0	0.0	0.0	0.0	0.0	0.0	0.0	0.0	0.0
ALDH7A1	501	symbol	H. sapiens	501	H. sapiens	0.0	0.0	0.0	0.0	0.0	0.0	0.0	0.0	0.0	0.0	0.0	0.0	0.0	0.0	0.0	0.0	0.0	0.0	0.0	0.0	0.0	0.0	0.0	0.0	0.0	0.0	0.0	0.0	0.0	0.0	0.0	0.0	0.0	1.0	0.0	0.0	0.0	0.0	0.0	0.0
SLCO3A1	28232	symbol	H. sapiens	28232	H. sapiens	0.0	0.0	0.0	0.0	0.0	0.0	0.0	0.0	0.0	0.0	0.0	0.0	0.0	0.0	0.0	0.0	0.0	0.0	0.0	0.0	0.0	0.0	0.0	0.0	0.0	0.0	0.0	0.0	0.0	0.0	0.0	0.0	0.0	0.0	0.0	0.0	0.0	0.0	0.0	0.0
NCKAP5	344148	symbol	H. sapiens	344148	H. sapiens	0.0	1.0	0.0	0.0	0.0	0.0	0.0	0.0	0.0	0.0	0.0	0.0	0.0	0.0	0.0	0.0	0.0	0.0	0.0	0.0	0.0	1.0	0.0	0.0	0.0	0.0	0.0	0.0	0.0	0.0	0.0	1.0	0.0	0.0	0.0	0.0	0.0	0.0	0.0	1.0
JARID2	3720	symbol	H. sapiens	3720	H. sapiens	0.0	1.0	0.0	1.0	0.0	0.0	0.0	0.0	0.0	0.0	1.0	0.0	0.0	0.0	0.0	1.0	0.0	0.0	0.0	1.0	0.0	0.0	0.0	0.0	0.0	0.0	0.0	0.0	0.0	0.0	0.0	0.0	1.0	0.0	0.0	0.0	0.0	0.0	0.0	0.0
PTCH1	5727	symbol	H. sapiens	5727	H. sapiens	1.0	0.0	1.0	0.0	0.0	0.0	0.0	0.0	0.0	1.0	1.0	1.0	0.0	1.0	0.0	1.0	0.0	1.0	0.0	1.0	0.0	0.0	1.0	1.0	0.0	0.0	0.0	0.0	0.0	0.0	0.0	0.0	0.0	0.0	0.0	0.0	0.0	0.0	0.0	0.0
PACS1	55690	symbol	H. sapiens	55690	H. sapiens	0.0	0.0	0.0	0.0	0.0	0.0	0.0	0.0	0.0	0.0	0.0	0.0	0.0	1.0	0.0	0.0	0.0	0.0	0.0	0.0	0.0	0.0	0.0	0.0	0.0	0.0	0.0	0.0	0.0	0.0	0.0	0.0	0.0	0.0	0.0	0.0	0.0	0.0	0.0	0.0
RASAL2	9462	symbol	H. sapiens	9462	H. sapiens	0.0	0.0	0.0	0.0	0.0	0.0	0.0	0.0	0.0	0.0	0.0	0.0	0.0	0.0	0.0	0.0	0.0	0.0	0.0	0.0	0.0	0.0	0.0	0.0	0.0	0.0	0.0	0.0	0.0	0.0	1.0	0.0	0.0	0.0	0.0	0.0	0.0	0.0	0.0	0.0
PREX1	57580	symbol	H. sapiens	57580	H. sapiens	0.0	1.0	0.0	0.0	0.0	0.0	0.0	0.0	0.0	0.0	0.0	1.0	1.0	0.0	0.0	0.0	0.0	0.0	0.0	0.0	0.0	1.0	0.0	0.0	0.0	0.0	0.0	0.0	0.0	0.0	1.0	1.0	0.0	0.0	0.0	0.0	0.0	0.0	0.0	0.0
BMP7	655	symbol	H. sapiens	655	H. sapiens	1.0	1.0	1.0	1.0	0.0	0.0	0.0	0.0	0.0	0.0	1.0	1.0	1.0	0.0	0.0	0.0	1.0	1.0	0.0	1.0	0.0	0.0	1.0	1.0	0.0	1.0	0.0	0.0	0.0	1.0	0.0	0.0	1.0	0.0	0.0	0.0	0.0	0.0	0.0	0.0
PRRC2B	84726	symbol	H. sapiens	84726	H. sapiens	0.0	0.0	0.0	0.0	0.0	0.0	0.0	0.0	0.0	0.0	0.0	0.0	0.0	0.0	0.0	0.0	0.0	0.0	0.0	0.0	0.0	0.0	0.0	0.0	0.0	0.0	0.0	0.0	0.0	0.0	0.0	0.0	0.0	0.0	0.0	0.0	0.0	0.0	0.0	0.0
SULF2	55959	symbol	H. sapiens	55959	H. sapiens	0.0	0.0	0.0	0.0	0.0	0.0	0.0	0.0	0.0	0.0	1.0	0.0	0.0	0.0	0.0	0.0	0.0	1.0	0.0	1.0	0.0	0.0	0.0	0.0	0.0	1.0	0.0	0.0	0.0	0.0	0.0	0.0	0.0	0.0	0.0	0.0	0.0	0.0	0.0	0.0
CUX1	1523	symbol	H. sapiens	1523	H. sapiens	0.0	0.0	0.0	0.0	0.0	0.0	0.0	0.0	0.0	0.0	0.0	1.0	0.0	0.0	0.0	0.0	0.0	0.0	0.0	0.0	0.0	0.0	0.0	0.0	0.0	0.0	0.0	0.0	0.0	0.0	0.0	0.0	0.0	0.0	0.0	0.0	0.0	0.0	0.0	0.0
MYCBP	26292	symbol	H. sapiens	26292	H. sapiens	0.0	0.0	0.0	0.0	0.0	0.0	0.0	0.0	0.0	0.0	0.0	0.0	0.0	0.0	0.0	0.0	0.0	0.0	0.0	0.0	0.0	0.0	0.0	0.0	0.0	0.0	0.0	0.0	0.0	0.0	0.0	0.0	0.0	0.0	0.0	0.0	0.0	0.0	0.0	0.0
MTR	4548	symbol	H. sapiens	4548	H. sapiens	0.0	0.0	0.0	0.0	0.0	0.0	0.0	0.0	0.0	0.0	1.0	1.0	0.0	0.0	0.0	0.0	0.0	0.0	0.0	0.0	0.0	0.0	0.0	0.0	0.0	0.0	0.0	0.0	0.0	0.0	0.0	0.0	0.0	1.0	0.0	0.0	0.0	0.0	0.0	0.0
FBXL5	26234	symbol	H. sapiens	26234	H. sapiens	0.0	0.0	0.0	0.0	0.0	0.0	0.0	0.0	0.0	0.0	0.0	0.0	0.0	0.0	0.0	0.0	0.0	0.0	0.0	0.0	0.0	0.0	0.0	0.0	0.0	0.0	0.0	0.0	0.0	0.0	0.0	0.0	0.0	0.0	1.0	0.0	0.0	0.0	0.0	0.0
TTC28	23331	symbol	H. sapiens	23331	H. sapiens	1.0	0.0	1.0	0.0	0.0	0.0	0.0	0.0	0.0	0.0	0.0	0.0	0.0	0.0	0.0	0.0	0.0	0.0	0.0	0.0	0.0	0.0	0.0	0.0	0.0	0.0	0.0	0.0	0.0	0.0	0.0	0.0	0.0	0.0	0.0	0.0	0.0	0.0	0.0	0.0
NKAIN1	79570	symbol	H. sapiens	79570	H. sapiens	0.0	0.0	0.0	0.0	0.0	0.0	0.0	0.0	0.0	0.0	0.0	0.0	0.0	0.0	0.0	0.0	0.0	0.0	0.0	0.0	0.0	0.0	0.0	0.0	0.0	0.0	0.0	0.0	0.0	0.0	0.0	0.0	0.0	0.0	0.0	0.0	0.0	0.0	0.0	0.0
CLEC16A	23274	symbol	H. sapiens	23274	H. sapiens	0.0	1.0	0.0	1.0	0.0	0.0	0.0	0.0	0.0	0.0	0.0	0.0	0.0	0.0	0.0	0.0	0.0	0.0	0.0	0.0	0.0	0.0	0.0	0.0	0.0	0.0	0.0	0.0	0.0	0.0	0.0	0.0	0.0	0.0	1.0	0.0	0.0	0.0	0.0	1.0
NPIPA7	101059938	symbol	H. sapiens	101059938	H. sapiens	0.0	0.0	0.0	0.0	0.0	0.0	0.0	0.0	0.0	0.0	0.0	0.0	0.0	0.0	0.0	0.0	0.0	0.0	0.0	0.0	0.0	0.0	0.0	0.0	0.0	0.0	0.0	0.0	0.0	0.0	0.0	0.0	0.0	0.0	0.0	0.0	0.0	0.0	0.0	0.0
SKIL	6498	symbol	H. sapiens	6498	H. sapiens	0.0	0.0	0.0	0.0	0.0	0.0	0.0	0.0	0.0	0.0	0.0	1.0	0.0	0.0	0.0	0.0	1.0	0.0	0.0	1.0	0.0	0.0	0.0	0.0	1.0	1.0	0.0	0.0	0.0	1.0	0.0	0.0	0.0	0.0	0.0	0.0	0.0	1.0	0.0	0.0
COL4A5	1287	symbol	H. sapiens	1287	H. sapiens	0.0	0.0	0.0	0.0	0.0	0.0	0.0	0.0	0.0	0.0	0.0	0.0	0.0	0.0	0.0	0.0	0.0	0.0	0.0	0.0	0.0	0.0	0.0	0.0	0.0	0.0	0.0	0.0	0.0	0.0	0.0	0.0	0.0	0.0	0.0	0.0	0.0	0.0	0.0	0.0
OTULIN	90268	symbol	H. sapiens	90268	H. sapiens	0.0	0.0	0.0	0.0	0.0	0.0	0.0	0.0	0.0	0.0	0.0	0.0	0.0	0.0	0.0	0.0	0.0	0.0	0.0	0.0	0.0	0.0	1.0	0.0	0.0	0.0	0.0	0.0	0.0	0.0	0.0	0.0	0.0	0.0	0.0	0.0	0.0	0.0	0.0	0.0
CEP83	51134	symbol	H. sapiens	51134	H. sapiens	0.0	0.0	0.0	0.0	1.0	0.0	0.0	0.0	0.0	0.0	0.0	0.0	0.0	0.0	0.0	0.0	0.0	0.0	0.0	0.0	0.0	0.0	0.0	0.0	0.0	0.0	1.0	0.0	1.0	0.0	0.0	0.0	0.0	0.0	0.0	0.0	0.0	0.0	0.0	0.0
GRIP1	23426	symbol	H. sapiens	23426	H. sapiens	0.0	0.0	0.0	0.0	0.0	0.0	0.0	0.0	0.0	0.0	0.0	1.0	0.0	1.0	0.0	0.0	0.0	0.0	0.0	0.0	0.0	0.0	1.0	0.0	0.0	0.0	0.0	0.0	0.0	0.0	0.0	0.0	0.0	0.0	0.0	0.0	0.0	0.0	0.0	0.0
LRP1B	53353	symbol	H. sapiens	53353	H. sapiens	0.0	0.0	0.0	0.0	0.0	0.0	0.0	0.0	0.0	0.0	0.0	0.0	0.0	0.0	0.0	0.0	0.0	0.0	0.0	0.0	0.0	0.0	0.0	0.0	0.0	0.0	0.0	0.0	0.0	0.0	0.0	0.0	0.0	0.0	0.0	0.0	0.0	0.0	0.0	0.0
GSTCD	79807	symbol	H. sapiens	79807	H. sapiens	0.0	0.0	0.0	0.0	0.0	0.0	0.0	0.0	0.0	0.0	0.0	0.0	0.0	0.0	0.0	0.0	0.0	0.0	0.0	0.0	0.0	0.0	0.0	0.0	0.0	0.0	0.0	0.0	0.0	0.0	0.0	0.0	0.0	0.0	0.0	0.0	0.0	0.0	0.0	0.0
GAPVD1	26130	symbol	H. sapiens	26130	H. sapiens	0.0	0.0	0.0	0.0	0.0	0.0	0.0	0.0	0.0	0.0	0.0	0.0	0.0	0.0	0.0	0.0	0.0	0.0	0.0	0.0	0.0	0.0	0.0	0.0	0.0	0.0	0.0	0.0	0.0	0.0	1.0	0.0	0.0	0.0	0.0	0.0	0.0	0.0	0.0	0.0
CENPF	1063	symbol	H. sapiens	1063	H. sapiens	1.0	0.0	1.0	1.0	1.0	1.0	0.0	0.0	0.0	0.0	0.0	0.0	0.0	0.0	0.0	1.0	1.0	1.0	0.0	0.0	1.0	0.0	0.0	0.0	0.0	0.0	0.0	0.0	0.0	0.0	0.0	0.0	1.0	0.0	0.0	0.0	0.0	0.0	0.0	0.0
MMS19	64210	symbol	H. sapiens	64210	H. sapiens	1.0	0.0	0.0	0.0	0.0	1.0	0.0	0.0	1.0	0.0	0.0	0.0	0.0	0.0	0.0	0.0	0.0	0.0	0.0	0.0	0.0	0.0	0.0	0.0	0.0	0.0	0.0	0.0	0.0	1.0	0.0	0.0	0.0	0.0	0.0	0.0	0.0	0.0	0.0	0.0
SMC4	10051	symbol	H. sapiens	10051	H. sapiens	1.0	0.0	0.0	0.0	0.0	0.0	1.0	1.0	0.0	0.0	0.0	0.0	0.0	0.0	0.0	0.0	0.0	0.0	0.0	0.0	1.0	0.0	0.0	0.0	0.0	0.0	0.0	0.0	0.0	0.0	0.0	0.0	0.0	0.0	0.0	0.0	0.0	0.0	0.0	0.0
TOP2A	7153	symbol	H. sapiens	7153	H. sapiens	1.0	0.0	1.0	1.0	0.0	0.0	1.0	1.0	1.0	0.0	0.0	0.0	0.0	0.0	0.0	0.0	1.0	0.0	1.0	0.0	0.0	0.0	0.0	0.0	0.0	0.0	0.0	0.0	0.0	0.0	0.0	0.0	0.0	0.0	0.0	0.0	1.0	0.0	0.0	1.0
CAV1	857	symbol	H. sapiens	857	H. sapiens	0.0	1.0	0.0	1.0	0.0	0.0	0.0	0.0	0.0	0.0	1.0	1.0	1.0	1.0	0.0	0.0	1.0	0.0	0.0	1.0	0.0	0.0	1.0	0.0	1.0	1.0	0.0	0.0	1.0	1.0	1.0	1.0	1.0	0.0	1.0	1.0	1.0	0.0	1.0	1.0
STMN3	50861	symbol	H. sapiens	50861	H. sapiens	0.0	1.0	0.0	0.0	0.0	0.0	0.0	0.0	0.0	0.0	0.0	0.0	0.0	0.0	0.0	0.0	0.0	0.0	0.0	1.0	0.0	1.0	0.0	0.0	0.0	0.0	0.0	0.0	0.0	1.0	1.0	1.0	0.0	0.0	0.0	0.0	0.0	0.0	0.0	1.0
SORCS2	57537	symbol	H. sapiens	57537	H. sapiens	0.0	0.0	0.0	0.0	0.0	0.0	0.0	0.0	0.0	0.0	0.0	0.0	0.0	0.0	0.0	0.0	0.0	0.0	0.0	0.0	0.0	0.0	0.0	0.0	0.0	0.0	0.0	0.0	0.0	0.0	0.0	0.0	0.0	0.0	0.0	0.0	0.0	0.0	0.0	0.0
TRIQK	286144	symbol	H. sapiens	286144	H. sapiens	0.0	0.0	0.0	0.0	0.0	0.0	0.0	0.0	0.0	0.0	0.0	0.0	0.0	0.0	0.0	0.0	0.0	0.0	0.0	0.0	0.0	0.0	0.0	0.0	0.0	0.0	0.0	0.0	0.0	0.0	0.0	0.0	0.0	0.0	0.0	0.0	0.0	0.0	0.0	0.0
DDIAS	220042	symbol	H. sapiens	220042	H. sapiens	0.0	0.0	1.0	1.0	0.0	0.0	0.0	0.0	0.0	0.0	0.0	0.0	0.0	0.0	0.0	0.0	1.0	0.0	0.0	0.0	0.0	0.0	0.0	0.0	1.0	0.0	0.0	0.0	0.0	1.0	0.0	0.0	0.0	0.0	0.0	0.0	0.0	0.0	0.0	0.0
MACC1	346389	symbol	H. sapiens	346389	H. sapiens	1.0	0.0	0.0	0.0	0.0	0.0	0.0	0.0	0.0	1.0	0.0	0.0	0.0	0.0	0.0	0.0	0.0	0.0	0.0	0.0	0.0	0.0	0.0	0.0	0.0	0.0	0.0	0.0	0.0	0.0	0.0	0.0	0.0	0.0	0.0	0.0	0.0	0.0	0.0	0.0
TRIP13	9319	symbol	H. sapiens	9319	H. sapiens	1.0	0.0	1.0	1.0	0.0	0.0	0.0	1.0	1.0	0.0	0.0	0.0	0.0	0.0	0.0	0.0	1.0	0.0	1.0	0.0	0.0	0.0	0.0	0.0	0.0	0.0	0.0	0.0	0.0	0.0	0.0	0.0	0.0	0.0	0.0	0.0	0.0	0.0	0.0	0.0
RIN2	54453	symbol	H. sapiens	54453	H. sapiens	0.0	0.0	0.0	0.0	0.0	0.0	0.0	0.0	0.0	0.0	0.0	0.0	0.0	0.0	0.0	0.0	0.0	0.0	0.0	0.0	0.0	0.0	0.0	0.0	0.0	0.0	0.0	0.0	0.0	0.0	1.0	0.0	0.0	0.0	0.0	0.0	0.0	0.0	0.0	0.0
SND1	27044	symbol	H. sapiens	27044	H. sapiens	0.0	0.0	1.0	0.0	0.0	1.0	0.0	0.0	0.0	0.0	0.0	0.0	0.0	1.0	0.0	0.0	0.0	0.0	0.0	0.0	0.0	0.0	0.0	0.0	0.0	0.0	0.0	0.0	0.0	0.0	0.0	0.0	0.0	0.0	0.0	0.0	0.0	0.0	0.0	0.0
USP5	8078	symbol	H. sapiens	8078	H. sapiens	0.0	0.0	0.0	0.0	0.0	0.0	0.0	0.0	0.0	0.0	0.0	0.0	0.0	0.0	0.0	0.0	0.0	0.0	0.0	0.0	0.0	0.0	0.0	0.0	0.0	0.0	0.0	0.0	0.0	0.0	0.0	0.0	0.0	0.0	1.0	0.0	0.0	0.0	0.0	0.0
FITM2	128486	symbol	H. sapiens	128486	H. sapiens	0.0	0.0	0.0	0.0	0.0	0.0	0.0	0.0	0.0	0.0	0.0	1.0	0.0	0.0	0.0	0.0	0.0	0.0	0.0	0.0	0.0	0.0	0.0	0.0	0.0	0.0	0.0	0.0	0.0	0.0	0.0	0.0	0.0	0.0	0.0	0.0	0.0	0.0	0.0	0.0
UCK2	7371	symbol	H. sapiens	7371	H. sapiens	0.0	0.0	0.0	0.0	0.0	0.0	0.0	0.0	0.0	0.0	0.0	0.0	0.0	0.0	0.0	0.0	0.0	0.0	0.0	0.0	0.0	0.0	0.0	0.0	0.0	0.0	0.0	0.0	0.0	0.0	0.0	0.0	0.0	0.0	0.0	0.0	0.0	0.0	0.0	0.0
TYMS	7298	symbol	H. sapiens	7298	H. sapiens	0.0	0.0	1.0	0.0	0.0	1.0	0.0	0.0	0.0	0.0	1.0	0.0	0.0	1.0	0.0	1.0	0.0	0.0	1.0	1.0	0.0	0.0	1.0	1.0	0.0	0.0	0.0	0.0	0.0	0.0	0.0	0.0	0.0	1.0	0.0	0.0	0.0	0.0	0.0	0.0
SDK2	54549	symbol	H. sapiens	54549	H. sapiens	0.0	0.0	0.0	0.0	0.0	0.0	0.0	0.0	0.0	0.0	0.0	0.0	1.0	0.0	0.0	0.0	0.0	0.0	0.0	0.0	0.0	0.0	0.0	0.0	0.0	0.0	0.0	0.0	0.0	0.0	0.0	0.0	0.0	0.0	0.0	1.0	0.0	0.0	0.0	0.0
GALNT2	2590	symbol	H. sapiens	2590	H. sapiens	0.0	0.0	0.0	0.0	0.0	0.0	0.0	0.0	0.0	0.0	0.0	0.0	0.0	0.0	0.0	0.0	0.0	0.0	0.0	0.0	0.0	0.0	0.0	0.0	0.0	0.0	0.0	0.0	0.0	0.0	0.0	0.0	0.0	0.0	0.0	0.0	0.0	0.0	1.0	0.0
NOP56	10528	symbol	H. sapiens	10528	H. sapiens	0.0	0.0	0.0	0.0	0.0	0.0	0.0	0.0	0.0	0.0	0.0	0.0	0.0	0.0	0.0	0.0	0.0	0.0	0.0	0.0	0.0	0.0	0.0	0.0	0.0	0.0	0.0	0.0	0.0	0.0	0.0	0.0	0.0	0.0	0.0	0.0	0.0	0.0	0.0	0.0
DARS	1615	gene_synonym	H. sapiens	1615	H. sapiens	0.0	0.0	0.0	0.0	0.0	0.0	0.0	0.0	0.0	0.0	0.0	0.0	0.0	1.0	0.0	0.0	0.0	0.0	0.0	0.0	0.0	0.0	0.0	0.0	0.0	0.0	0.0	0.0	0.0	0.0	0.0	0.0	0.0	0.0	0.0	0.0	0.0	0.0	0.0	0.0
NARS2	79731	symbol	H. sapiens	79731	H. sapiens	0.0	0.0	0.0	0.0	0.0	0.0	0.0	0.0	0.0	0.0	0.0	0.0	0.0	1.0	0.0	0.0	0.0	0.0	0.0	0.0	0.0	0.0	0.0	0.0	0.0	0.0	0.0	0.0	0.0	0.0	0.0	0.0	0.0	0.0	0.0	0.0	0.0	0.0	0.0	0.0
QSER1	79832	symbol	H. sapiens	79832	H. sapiens	0.0	0.0	0.0	0.0	0.0	0.0	0.0	0.0	0.0	0.0	0.0	0.0	0.0	0.0	0.0	0.0	0.0	0.0	0.0	0.0	0.0	0.0	0.0	0.0	0.0	0.0	0.0	0.0	0.0	0.0	0.0	0.0	0.0	0.0	0.0	0.0	0.0	0.0	0.0	0.0
CCNA2	890	symbol	H. sapiens	890	H. sapiens	1.0	0.0	1.0	0.0	0.0	1.0	0.0	0.0	0.0	0.0	1.0	0.0	0.0	0.0	0.0	0.0	1.0	0.0	1.0	0.0	0.0	0.0	1.0	0.0	0.0	1.0	0.0	0.0	0.0	0.0	1.0	0.0	0.0	0.0	0.0	0.0	0.0	0.0	0.0	0.0
TINCR	257000	symbol	H. sapiens	257000	H. sapiens	0.0	0.0	0.0	0.0	0.0	0.0	0.0	0.0	0.0	0.0	0.0	0.0	0.0	0.0	0.0	0.0	0.0	0.0	0.0	0.0	0.0	0.0	0.0	0.0	0.0	0.0	0.0	0.0	0.0	0.0	0.0	0.0	0.0	0.0	0.0	0.0	0.0	0.0	0.0	0.0
MXI1	4601	symbol	H. sapiens	4601	H. sapiens	0.0	0.0	0.0	0.0	0.0	0.0	0.0	0.0	0.0	0.0	0.0	0.0	0.0	0.0	0.0	0.0	0.0	0.0	0.0	0.0	0.0	0.0	0.0	0.0	0.0	0.0	0.0	0.0	0.0	0.0	0.0	0.0	0.0	0.0	0.0	0.0	0.0	0.0	0.0	0.0
WWC2	80014	symbol	H. sapiens	80014	H. sapiens	0.0	0.0	0.0	0.0	0.0	0.0	0.0	0.0	0.0	0.0	0.0	0.0	0.0	0.0	0.0	1.0	0.0	0.0	0.0	0.0	0.0	0.0	0.0	0.0	0.0	0.0	0.0	0.0	0.0	1.0	0.0	0.0	0.0	0.0	0.0	0.0	0.0	0.0	0.0	0.0
MAD2L1	4085	symbol	H. sapiens	4085	H. sapiens	1.0	1.0	1.0	1.0	1.0	0.0	0.0	0.0	0.0	1.0	0.0	0.0	0.0	0.0	1.0	0.0	1.0	0.0	1.0	0.0	0.0	0.0	0.0	0.0	0.0	0.0	1.0	0.0	0.0	0.0	0.0	0.0	0.0	0.0	1.0	0.0	0.0	0.0	0.0	0.0
CUL7	9820	symbol	H. sapiens	9820	H. sapiens	1.0	1.0	1.0	1.0	0.0	0.0	0.0	0.0	0.0	1.0	0.0	1.0	0.0	0.0	0.0	0.0	0.0	0.0	0.0	0.0	0.0	0.0	0.0	0.0	0.0	0.0	0.0	0.0	0.0	0.0	0.0	0.0	0.0	0.0	1.0	0.0	0.0	0.0	0.0	0.0
PSMB7	5695	symbol	H. sapiens	5695	H. sapiens	0.0	0.0	1.0	1.0	0.0	0.0	0.0	0.0	0.0	0.0	0.0	0.0	0.0	1.0	0.0	0.0	1.0	1.0	1.0	0.0	0.0	0.0	0.0	0.0	0.0	0.0	0.0	0.0	0.0	0.0	0.0	0.0	0.0	0.0	1.0	0.0	0.0	1.0	0.0	0.0
CXCL12	6387	symbol	H. sapiens	6387	H. sapiens	0.0	1.0	0.0	0.0	0.0	0.0	0.0	0.0	0.0	0.0	1.0	1.0	1.0	0.0	0.0	1.0	1.0	0.0	0.0	0.0	0.0	0.0	0.0	0.0	1.0	0.0	0.0	1.0	0.0	1.0	0.0	1.0	0.0	0.0	0.0	0.0	1.0	0.0	0.0	0.0
PUS7	54517	symbol	H. sapiens	54517	H. sapiens	0.0	0.0	0.0	0.0	0.0	0.0	0.0	0.0	0.0	0.0	0.0	0.0	0.0	1.0	0.0	0.0	0.0	0.0	0.0	0.0	0.0	0.0	0.0	0.0	0.0	0.0	0.0	0.0	0.0	0.0	0.0	0.0	0.0	0.0	0.0	0.0	0.0	1.0	0.0	0.0
FAF1	11124	symbol	H. sapiens	11124	H. sapiens	0.0	1.0	0.0	0.0	0.0	1.0	0.0	0.0	0.0	0.0	0.0	0.0	1.0	0.0	0.0	0.0	0.0	0.0	0.0	0.0	0.0	1.0	0.0	0.0	1.0	0.0	0.0	0.0	0.0	0.0	0.0	0.0	0.0	0.0	1.0	0.0	0.0	0.0	0.0	0.0
PDZK1	5174	symbol	H. sapiens	5174	H. sapiens	0.0	0.0	0.0	0.0	0.0	0.0	0.0	0.0	0.0	0.0	0.0	0.0	0.0	1.0	0.0	0.0	0.0	0.0	0.0	0.0	0.0	0.0	0.0	0.0	0.0	0.0	0.0	0.0	0.0	0.0	0.0	0.0	0.0	0.0	0.0	0.0	0.0	0.0	0.0	0.0
CMSS1	84319	symbol	H. sapiens	84319	H. sapiens	0.0	0.0	0.0	0.0	0.0	0.0	0.0	0.0	0.0	0.0	0.0	0.0	0.0	0.0	0.0	0.0	0.0	0.0	0.0	0.0	0.0	0.0	0.0	0.0	0.0	0.0	0.0	0.0	0.0	0.0	0.0	0.0	0.0	0.0	0.0	0.0	0.0	0.0	0.0	0.0
PTPRK	5796	symbol	H. sapiens	5796	H. sapiens	0.0	0.0	0.0	0.0	0.0	0.0	0.0	0.0	0.0	0.0	0.0	0.0	1.0	0.0	0.0	0.0	1.0	0.0	0.0	0.0	0.0	0.0	0.0	0.0	0.0	1.0	0.0	1.0	0.0	0.0	0.0	0.0	0.0	0.0	0.0	0.0	0.0	0.0	0.0	0.0
ABLIM1	3983	symbol	H. sapiens	3983	H. sapiens	0.0	0.0	0.0	0.0	0.0	0.0	0.0	0.0	0.0	0.0	0.0	0.0	0.0	0.0	0.0	0.0	0.0	0.0	0.0	0.0	0.0	0.0	0.0	0.0	0.0	0.0	0.0	0.0	1.0	0.0	0.0	0.0	0.0	0.0	0.0	0.0	0.0	0.0	0.0	0.0
THBS1	7057	symbol	H. sapiens	7057	H. sapiens	0.0	0.0	0.0	1.0	0.0	0.0	0.0	0.0	0.0	0.0	0.0	1.0	1.0	1.0	0.0	0.0	1.0	0.0	0.0	0.0	0.0	0.0	1.0	0.0	1.0	1.0	0.0	0.0	0.0	1.0	0.0	0.0	0.0	0.0	0.0	0.0	0.0	1.0	1.0	0.0
NCAPG	64151	symbol	H. sapiens	64151	H. sapiens	1.0	0.0	0.0	0.0	0.0	0.0	1.0	0.0	0.0	0.0	0.0	0.0	0.0	0.0	0.0	0.0	0.0	0.0	0.0	0.0	0.0	0.0	0.0	0.0	0.0	0.0	0.0	0.0	0.0	0.0	0.0	0.0	0.0	0.0	0.0	0.0	0.0	0.0	0.0	0.0
TMEM231	79583	symbol	H. sapiens	79583	H. sapiens	0.0	0.0	0.0	0.0	0.0	0.0	0.0	0.0	0.0	0.0	0.0	0.0	0.0	0.0	0.0	0.0	0.0	1.0	0.0	1.0	0.0	0.0	0.0	1.0	0.0	0.0	0.0	0.0	1.0	0.0	0.0	0.0	0.0	0.0	0.0	0.0	0.0	0.0	0.0	0.0
CACNG4	27092	symbol	H. sapiens	27092	H. sapiens	0.0	0.0	0.0	0.0	0.0	0.0	0.0	0.0	0.0	0.0	0.0	0.0	0.0	1.0	0.0	0.0	0.0	0.0	0.0	0.0	0.0	0.0	0.0	0.0	0.0	0.0	0.0	0.0	0.0	0.0	0.0	0.0	0.0	0.0	0.0	0.0	0.0	0.0	0.0	0.0
RAMP3	10268	symbol	H. sapiens	10268	H. sapiens	0.0	0.0	0.0	0.0	0.0	0.0	0.0	0.0	0.0	0.0	0.0	0.0	0.0	1.0	0.0	0.0	0.0	0.0	0.0	0.0	0.0	0.0	1.0	0.0	0.0	0.0	0.0	0.0	0.0	0.0	0.0	0.0	0.0	0.0	0.0	0.0	0.0	0.0	1.0	0.0
COLGALT1	79709	symbol	H. sapiens	79709	H. sapiens	0.0	0.0	0.0	0.0	0.0	0.0	0.0	0.0	0.0	0.0	0.0	0.0	0.0	0.0	0.0	0.0	0.0	0.0	0.0	0.0	0.0	0.0	0.0	0.0	0.0	0.0	0.0	0.0	0.0	0.0	0.0	1.0	0.0	0.0	0.0	0.0	0.0	0.0	0.0	0.0
PLXNA1	5361	symbol	H. sapiens	5361	H. sapiens	0.0	0.0	0.0	0.0	0.0	0.0	0.0	0.0	0.0	0.0	1.0	1.0	1.0	0.0	0.0	1.0	0.0	1.0	0.0	0.0	0.0	0.0	0.0	0.0	0.0	0.0	0.0	0.0	0.0	0.0	1.0	0.0	0.0	0.0	0.0	0.0	0.0	0.0	0.0	0.0
ITFG1	81533	symbol	H. sapiens	81533	H. sapiens	0.0	0.0	0.0	0.0	0.0	0.0	0.0	0.0	0.0	0.0	0.0	0.0	0.0	0.0	0.0	0.0	0.0	0.0	0.0	0.0	0.0	0.0	0.0	0.0	0.0	0.0	0.0	0.0	0.0	0.0	0.0	0.0	0.0	0.0	0.0	0.0	0.0	0.0	0.0	0.0
SLC19A1	6573	symbol	H. sapiens	6573	H. sapiens	0.0	0.0	0.0	0.0	0.0	0.0	0.0	0.0	0.0	0.0	0.0	0.0	0.0	0.0	0.0	0.0	0.0	0.0	0.0	0.0	0.0	0.0	0.0	0.0	0.0	0.0	0.0	0.0	0.0	0.0	0.0	0.0	0.0	1.0	0.0	0.0	0.0	0.0	0.0	0.0
MBTD1	54799	symbol	H. sapiens	54799	H. sapiens	0.0	0.0	0.0	0.0	0.0	0.0	0.0	0.0	0.0	0.0	0.0	0.0	0.0	0.0	0.0	0.0	0.0	0.0	0.0	1.0	0.0	0.0	0.0	0.0	0.0	0.0	0.0	0.0	0.0	0.0	0.0	0.0	0.0	0.0	0.0	0.0	0.0	0.0	0.0	0.0
OXR1	55074	symbol	H. sapiens	55074	H. sapiens	0.0	0.0	0.0	0.0	0.0	0.0	0.0	0.0	0.0	0.0	0.0	0.0	0.0	0.0	0.0	0.0	0.0	0.0	0.0	0.0	0.0	0.0	0.0	0.0	0.0	0.0	0.0	0.0	0.0	1.0	0.0	0.0	0.0	0.0	0.0	0.0	0.0	0.0	0.0	0.0
ZNF195	7748	symbol	H. sapiens	7748	H. sapiens	0.0	0.0	0.0	0.0	0.0	0.0	0.0	0.0	0.0	0.0	0.0	0.0	0.0	0.0	0.0	0.0	0.0	0.0	0.0	0.0	0.0	0.0	0.0	0.0	0.0	0.0	0.0	0.0	0.0	0.0	0.0	0.0	0.0	0.0	0.0	0.0	0.0	0.0	0.0	0.0
ELK3	2004	symbol	H. sapiens	2004	H. sapiens	0.0	0.0	0.0	0.0	0.0	0.0	0.0	0.0	0.0	0.0	0.0	0.0	0.0	0.0	0.0	0.0	0.0	0.0	0.0	0.0	0.0	0.0	0.0	0.0	0.0	0.0	0.0	0.0	0.0	0.0	0.0	0.0	0.0	0.0	0.0	0.0	0.0	0.0	0.0	0.0
NUCKS1	64710	symbol	H. sapiens	64710	H. sapiens	0.0	0.0	0.0	0.0	0.0	1.0	0.0	0.0	1.0	0.0	0.0	0.0	0.0	1.0	0.0	0.0	0.0	0.0	0.0	0.0	0.0	0.0	1.0	0.0	0.0	0.0	0.0	1.0	0.0	0.0	0.0	0.0	0.0	0.0	0.0	0.0	0.0	0.0	0.0	0.0
DBNDD1	79007	symbol	H. sapiens	79007	H. sapiens	0.0	0.0	0.0	0.0	0.0	0.0	0.0	0.0	0.0	0.0	0.0	0.0	0.0	0.0	0.0	0.0	0.0	0.0	0.0	0.0	0.0	0.0	0.0	0.0	0.0	0.0	0.0	0.0	0.0	0.0	0.0	0.0	0.0	0.0	0.0	0.0	0.0	0.0	0.0	0.0
HCG18	414777	symbol	H. sapiens	414777	H. sapiens	0.0	0.0	0.0	0.0	0.0	0.0	0.0	0.0	0.0	0.0	0.0	0.0	0.0	0.0	0.0	0.0	0.0	0.0	0.0	0.0	0.0	0.0	0.0	0.0	0.0	0.0	0.0	0.0	0.0	0.0	0.0	0.0	0.0	0.0	0.0	0.0	0.0	0.0	0.0	0.0
SERPINA1	5265	symbol	H. sapiens	5265	H. sapiens	0.0	0.0	0.0	0.0	1.0	0.0	0.0	0.0	0.0	0.0	0.0	0.0	0.0	0.0	0.0	0.0	0.0	0.0	0.0	0.0	0.0	0.0	0.0	0.0	0.0	0.0	0.0	0.0	0.0	0.0	0.0	0.0	0.0	0.0	0.0	0.0	0.0	0.0	0.0	0.0
TGFBI	7045	symbol	H. sapiens	7045	H. sapiens	0.0	0.0	0.0	0.0	0.0	0.0	0.0	0.0	0.0	0.0	0.0	0.0	1.0	0.0	0.0	0.0	0.0	0.0	0.0	0.0	0.0	0.0	0.0	0.0	0.0	0.0	0.0	0.0	0.0	0.0	0.0	0.0	0.0	0.0	0.0	0.0	0.0	0.0	0.0	0.0
PFKFB3	5209	symbol	H. sapiens	5209	H. sapiens	0.0	0.0	0.0	0.0	0.0	0.0	0.0	0.0	0.0	0.0	0.0	0.0	0.0	1.0	0.0	0.0	0.0	0.0	0.0	0.0	0.0	0.0	0.0	0.0	0.0	0.0	0.0	0.0	0.0	0.0	0.0	0.0	0.0	0.0	1.0	0.0	0.0	0.0	0.0	0.0
CDH26	60437	symbol	H. sapiens	60437	H. sapiens	0.0	0.0	0.0	0.0	0.0	0.0	0.0	0.0	0.0	0.0	0.0	0.0	1.0	0.0	0.0	0.0	0.0	0.0	0.0	0.0	0.0	0.0	0.0	0.0	0.0	0.0	0.0	0.0	0.0	0.0	0.0	0.0	0.0	0.0	0.0	1.0	0.0	0.0	0.0	0.0
DUSP4	1846	symbol	H. sapiens	1846	H. sapiens	0.0	0.0	0.0	0.0	0.0	0.0	0.0	0.0	0.0	0.0	0.0	0.0	0.0	0.0	0.0	0.0	0.0	0.0	0.0	0.0	0.0	0.0	0.0	0.0	0.0	0.0	0.0	0.0	0.0	1.0	0.0	0.0	0.0	0.0	0.0	0.0	0.0	0.0	0.0	0.0
NSF	4905	symbol	H. sapiens	4905	H. sapiens	0.0	0.0	0.0	0.0	1.0	0.0	0.0	0.0	0.0	0.0	0.0	0.0	0.0	1.0	0.0	0.0	0.0	0.0	0.0	0.0	0.0	0.0	0.0	0.0	0.0	0.0	0.0	0.0	1.0	0.0	0.0	0.0	0.0	0.0	1.0	0.0	0.0	0.0	0.0	1.0
CFDP1	10428	symbol	H. sapiens	10428	H. sapiens	0.0	0.0	0.0	0.0	0.0	0.0	0.0	0.0	0.0	0.0	0.0	1.0	0.0	0.0	0.0	0.0	0.0	0.0	0.0	0.0	0.0	0.0	0.0	0.0	0.0	0.0	0.0	0.0	0.0	0.0	0.0	0.0	0.0	0.0	0.0	0.0	0.0	0.0	0.0	0.0
DEPDC1	55635	symbol	H. sapiens	55635	H. sapiens	0.0	0.0	0.0	0.0	0.0	0.0	0.0	0.0	0.0	0.0	0.0	0.0	0.0	0.0	0.0	0.0	0.0	0.0	0.0	0.0	0.0	0.0	0.0	0.0	0.0	0.0	0.0	0.0	0.0	0.0	1.0	0.0	0.0	0.0	0.0	0.0	0.0	0.0	0.0	0.0
CCDC91	55297	symbol	H. sapiens	55297	H. sapiens	0.0	0.0	0.0	0.0	0.0	0.0	0.0	0.0	0.0	0.0	0.0	0.0	0.0	0.0	0.0	0.0	0.0	0.0	0.0	0.0	0.0	0.0	0.0	0.0	0.0	0.0	0.0	0.0	0.0	0.0	0.0	0.0	0.0	0.0	0.0	0.0	0.0	0.0	0.0	0.0
SDK1	221935	symbol	H. sapiens	221935	H. sapiens	0.0	0.0	0.0	0.0	0.0	0.0	0.0	0.0	0.0	0.0	0.0	1.0	1.0	0.0	0.0	0.0	0.0	0.0	0.0	0.0	0.0	0.0	0.0	0.0	0.0	0.0	0.0	0.0	0.0	0.0	0.0	0.0	0.0	0.0	0.0	1.0	0.0	0.0	0.0	0.0
XYLT1	64131	symbol	H. sapiens	64131	H. sapiens	0.0	0.0	0.0	0.0	0.0	0.0	0.0	0.0	0.0	0.0	0.0	0.0	0.0	0.0	0.0	0.0	0.0	0.0	1.0	1.0	0.0	0.0	0.0	0.0	0.0	0.0	0.0	0.0	0.0	0.0	0.0	0.0	0.0	0.0	0.0	0.0	0.0	0.0	0.0	0.0
TTL	150465	symbol	H. sapiens	150465	H. sapiens	1.0	1.0	1.0	1.0	1.0	0.0	0.0	0.0	0.0	0.0	0.0	1.0	0.0	0.0	1.0	1.0	0.0	0.0	0.0	0.0	0.0	0.0	0.0	0.0	0.0	0.0	0.0	0.0	0.0	0.0	0.0	0.0	0.0	0.0	0.0	0.0	0.0	0.0	0.0	0.0
LIMCH1	22998	symbol	H. sapiens	22998	H. sapiens	0.0	1.0	0.0	0.0	0.0	0.0	0.0	0.0	0.0	0.0	0.0	0.0	1.0	0.0	0.0	0.0	0.0	0.0	0.0	0.0	0.0	0.0	0.0	0.0	0.0	0.0	0.0	0.0	0.0	0.0	0.0	1.0	0.0	0.0	0.0	0.0	0.0	0.0	0.0	0.0
OLFM1	10439	symbol	H. sapiens	10439	H. sapiens	0.0	0.0	0.0	0.0	0.0	0.0	0.0	0.0	0.0	0.0	0.0	1.0	0.0	0.0	0.0	1.0	0.0	0.0	0.0	1.0	0.0	0.0	0.0	0.0	0.0	0.0	0.0	0.0	0.0	0.0	0.0	0.0	0.0	0.0	0.0	0.0	0.0	0.0	0.0	0.0
SMTNL2	342527	symbol	H. sapiens	342527	H. sapiens	0.0	0.0	0.0	0.0	0.0	0.0	0.0	0.0	0.0	0.0	0.0	0.0	0.0	0.0	0.0	0.0	0.0	0.0	0.0	0.0	0.0	0.0	0.0	0.0	0.0	0.0	0.0	0.0	0.0	0.0	0.0	1.0	0.0	0.0	0.0	0.0	0.0	0.0	0.0	0.0
CBX1	10951	symbol	H. sapiens	10951	H. sapiens	0.0	0.0	0.0	0.0	0.0	0.0	0.0	0.0	0.0	0.0	0.0	0.0	0.0	0.0	0.0	0.0	0.0	0.0	0.0	0.0	0.0	0.0	0.0	0.0	0.0	0.0	0.0	0.0	0.0	0.0	0.0	0.0	0.0	0.0	0.0	0.0	0.0	0.0	0.0	0.0
FARP1	10160	symbol	H. sapiens	10160	H. sapiens	0.0	0.0	0.0	0.0	0.0	0.0	0.0	0.0	0.0	0.0	0.0	1.0	0.0	0.0	0.0	0.0	0.0	0.0	0.0	0.0	0.0	0.0	0.0	0.0	0.0	0.0	0.0	0.0	0.0	0.0	1.0	0.0	0.0	0.0	0.0	0.0	0.0	0.0	0.0	0.0
GRIK3	2899	symbol	H. sapiens	2899	H. sapiens	0.0	0.0	0.0	0.0	0.0	0.0	0.0	0.0	0.0	0.0	0.0	0.0	0.0	0.0	0.0	0.0	0.0	0.0	0.0	0.0	0.0	0.0	0.0	0.0	0.0	0.0	0.0	0.0	0.0	0.0	0.0	0.0	0.0	0.0	0.0	0.0	0.0	0.0	0.0	0.0
AFF4	27125	symbol	H. sapiens	27125	H. sapiens	0.0	0.0	0.0	0.0	0.0	0.0	0.0	0.0	0.0	0.0	0.0	0.0	0.0	0.0	0.0	0.0	0.0	0.0	0.0	0.0	0.0	0.0	0.0	0.0	0.0	0.0	0.0	0.0	0.0	0.0	0.0	0.0	0.0	0.0	0.0	0.0	0.0	0.0	0.0	0.0
PAICS	10606	symbol	H. sapiens	10606	H. sapiens	0.0	0.0	0.0	0.0	0.0	0.0	0.0	0.0	0.0	0.0	0.0	0.0	0.0	0.0	0.0	0.0	0.0	0.0	0.0	0.0	0.0	0.0	0.0	0.0	0.0	0.0	0.0	0.0	0.0	0.0	0.0	0.0	0.0	1.0	0.0	0.0	0.0	0.0	0.0	0.0
CENPE	1062	symbol	H. sapiens	1062	H. sapiens	1.0	1.0	1.0	1.0	1.0	0.0	0.0	0.0	0.0	1.0	0.0	0.0	0.0	0.0	0.0	0.0	0.0	0.0	0.0	0.0	1.0	0.0	0.0	0.0	0.0	0.0	0.0	0.0	0.0	0.0	0.0	0.0	0.0	0.0	0.0	0.0	0.0	0.0	0.0	0.0
ANLN	54443	symbol	H. sapiens	54443	H. sapiens	1.0	1.0	1.0	1.0	0.0	0.0	0.0	0.0	0.0	1.0	0.0	1.0	0.0	0.0	0.0	0.0	0.0	0.0	0.0	0.0	0.0	0.0	0.0	0.0	0.0	0.0	0.0	0.0	1.0	0.0	0.0	1.0	0.0	0.0	0.0	0.0	0.0	0.0	0.0	0.0
TUBB3	10381	symbol	H. sapiens	10381	H. sapiens	0.0	1.0	0.0	0.0	0.0	0.0	0.0	0.0	0.0	0.0	0.0	1.0	0.0	0.0	0.0	0.0	0.0	0.0	0.0	0.0	0.0	0.0	0.0	0.0	0.0	0.0	0.0	0.0	0.0	0.0	0.0	0.0	0.0	0.0	0.0	0.0	0.0	0.0	0.0	0.0
NDC1	55706	symbol	H. sapiens	55706	H. sapiens	1.0	0.0	0.0	0.0	0.0	0.0	0.0	1.0	0.0	0.0	0.0	0.0	0.0	1.0	0.0	0.0	0.0	0.0	0.0	0.0	0.0	0.0	0.0	0.0	0.0	0.0	0.0	0.0	0.0	1.0	0.0	0.0	0.0	0.0	0.0	1.0	0.0	0.0	0.0	0.0
NDUFA10	4705	symbol	H. sapiens	4705	H. sapiens	0.0	0.0	0.0	0.0	0.0	0.0	0.0	0.0	0.0	0.0	0.0	0.0	0.0	0.0	0.0	0.0	0.0	0.0	0.0	0.0	0.0	0.0	0.0	0.0	0.0	0.0	0.0	0.0	0.0	0.0	0.0	0.0	0.0	0.0	0.0	0.0	0.0	0.0	0.0	0.0
PLEKHA7	144100	symbol	H. sapiens	144100	H. sapiens	0.0	0.0	0.0	0.0	0.0	0.0	0.0	0.0	0.0	0.0	0.0	0.0	1.0	0.0	0.0	0.0	0.0	0.0	0.0	0.0	0.0	0.0	0.0	0.0	0.0	0.0	0.0	0.0	0.0	0.0	0.0	0.0	0.0	0.0	0.0	1.0	0.0	0.0	0.0	0.0
VWA8	23078	symbol	H. sapiens	23078	H. sapiens	0.0	0.0	0.0	0.0	0.0	0.0	0.0	0.0	0.0	0.0	0.0	0.0	0.0	0.0	0.0	0.0	0.0	0.0	0.0	0.0	0.0	0.0	0.0	0.0	0.0	0.0	0.0	0.0	0.0	0.0	0.0	0.0	0.0	0.0	0.0	0.0	0.0	0.0	0.0	0.0
CCNB1	891	symbol	H. sapiens	891	H. sapiens	1.0	1.0	1.0	1.0	1.0	0.0	1.0	0.0	0.0	1.0	1.0	0.0	0.0	0.0	1.0	1.0	1.0	0.0	1.0	1.0	0.0	0.0	1.0	0.0	0.0	0.0	0.0	0.0	0.0	0.0	0.0	0.0	1.0	0.0	1.0	0.0	0.0	0.0	1.0	1.0
CAV2	858	symbol	H. sapiens	858	H. sapiens	1.0	0.0	1.0	1.0	1.0	0.0	0.0	0.0	0.0	0.0	0.0	0.0	0.0	0.0	0.0	0.0	0.0	0.0	0.0	0.0	0.0	0.0	1.0	0.0	0.0	1.0	0.0	0.0	1.0	0.0	1.0	0.0	1.0	0.0	0.0	0.0	0.0	0.0	0.0	0.0
HS6ST3	266722	symbol	H. sapiens	266722	H. sapiens	0.0	0.0	0.0	0.0	0.0	0.0	0.0	0.0	0.0	0.0	0.0	0.0	0.0	0.0	0.0	0.0	0.0	0.0	0.0	0.0	0.0	0.0	0.0	0.0	0.0	0.0	0.0	0.0	0.0	0.0	0.0	0.0	0.0	0.0	0.0	0.0	0.0	0.0	0.0	0.0
LFNG	3955	symbol	H. sapiens	3955	H. sapiens	0.0	0.0	0.0	0.0	0.0	0.0	0.0	1.0	0.0	0.0	0.0	0.0	0.0	0.0	1.0	0.0	0.0	0.0	0.0	1.0	0.0	0.0	0.0	1.0	0.0	0.0	0.0	0.0	0.0	0.0	0.0	0.0	0.0	0.0	0.0	0.0	1.0	0.0	0.0	0.0
FHL2	2274	symbol	H. sapiens	2274	H. sapiens	0.0	0.0	0.0	0.0	0.0	0.0	0.0	0.0	0.0	0.0	0.0	0.0	0.0	0.0	0.0	0.0	0.0	0.0	0.0	0.0	0.0	0.0	1.0	0.0	0.0	0.0	0.0	0.0	0.0	1.0	0.0	0.0	0.0	0.0	0.0	0.0	0.0	0.0	0.0	0.0
HMGB1P5	10354	symbol	H. sapiens	10354	H. sapiens	0.0	0.0	0.0	0.0	0.0	0.0	0.0	0.0	0.0	0.0	0.0	0.0	0.0	0.0	0.0	0.0	0.0	0.0	0.0	0.0	0.0	0.0	0.0	0.0	0.0	0.0	0.0	0.0	0.0	0.0	0.0	0.0	0.0	0.0	0.0	0.0	0.0	0.0	0.0	0.0
CEP55	55165	symbol	H. sapiens	55165	H. sapiens	1.0	0.0	0.0	0.0	1.0	0.0	0.0	0.0	0.0	1.0	0.0	0.0	0.0	0.0	0.0	0.0	0.0	1.0	0.0	0.0	0.0	0.0	0.0	0.0	0.0	0.0	0.0	0.0	0.0	0.0	0.0	0.0	0.0	0.0	0.0	0.0	0.0	0.0	0.0	0.0
RAPGEF1	2889	symbol	H. sapiens	2889	H. sapiens	0.0	0.0	0.0	0.0	0.0	0.0	0.0	0.0	0.0	0.0	0.0	1.0	1.0	0.0	0.0	0.0	0.0	0.0	0.0	1.0	0.0	0.0	1.0	0.0	0.0	1.0	0.0	0.0	0.0	1.0	1.0	0.0	0.0	0.0	0.0	0.0	0.0	0.0	0.0	0.0
SLC4A7	9497	symbol	H. sapiens	9497	H. sapiens	0.0	0.0	0.0	0.0	0.0	0.0	0.0	0.0	0.0	0.0	0.0	0.0	0.0	0.0	0.0	0.0	0.0	0.0	0.0	1.0	0.0	0.0	0.0	1.0	0.0	0.0	0.0	0.0	0.0	0.0	0.0	0.0	0.0	0.0	0.0	0.0	0.0	0.0	0.0	0.0
IGFBP5	3488	symbol	H. sapiens	3488	H. sapiens	0.0	0.0	0.0	0.0	0.0	0.0	0.0	0.0	0.0	0.0	1.0	0.0	1.0	1.0	0.0	1.0	0.0	1.0	0.0	0.0	0.0	0.0	1.0	0.0	0.0	0.0	0.0	0.0	0.0	0.0	0.0	0.0	1.0	0.0	0.0	0.0	0.0	0.0	0.0	0.0
POLD3	10714	symbol	H. sapiens	10714	H. sapiens	0.0	0.0	0.0	0.0	0.0	1.0	0.0	0.0	1.0	0.0	0.0	0.0	0.0	0.0	0.0	0.0	0.0	0.0	0.0	0.0	0.0	0.0	0.0	0.0	0.0	0.0	0.0	1.0	0.0	0.0	0.0	0.0	0.0	0.0	0.0	0.0	0.0	0.0	0.0	0.0
PBX3	5090	symbol	H. sapiens	5090	H. sapiens	0.0	0.0	0.0	0.0	0.0	0.0	0.0	0.0	0.0	0.0	0.0	0.0	0.0	0.0	0.0	0.0	0.0	0.0	0.0	0.0	0.0	0.0	0.0	1.0	0.0	0.0	0.0	0.0	0.0	0.0	0.0	0.0	0.0	0.0	0.0	0.0	0.0	0.0	0.0	0.0
KIF23	9493	symbol	H. sapiens	9493	H. sapiens	1.0	1.0	1.0	0.0	1.0	0.0	0.0	0.0	0.0	1.0	0.0	0.0	0.0	0.0	1.0	0.0	0.0	0.0	0.0	0.0	0.0	0.0	0.0	0.0	0.0	0.0	0.0	0.0	0.0	0.0	0.0	1.0	0.0	0.0	0.0	0.0	0.0	0.0	0.0	0.0
GNPNAT1	64841	symbol	H. sapiens	64841	H. sapiens	0.0	0.0	0.0	0.0	0.0	0.0	0.0	0.0	0.0	0.0	1.0	0.0	0.0	0.0	0.0	0.0	0.0	0.0	0.0	0.0	0.0	0.0	0.0	0.0	0.0	0.0	0.0	0.0	0.0	0.0	0.0	0.0	0.0	0.0	0.0	0.0	0.0	0.0	0.0	0.0
VTI1A	143187	symbol	H. sapiens	143187	H. sapiens	0.0	0.0	0.0	0.0	0.0	0.0	0.0	0.0	0.0	0.0	0.0	0.0	0.0	1.0	0.0	0.0	0.0	0.0	0.0	0.0	0.0	0.0	0.0	0.0	0.0	0.0	0.0	0.0	0.0	0.0	0.0	0.0	0.0	0.0	0.0	0.0	0.0	0.0	0.0	0.0
PRC1	9055	symbol	H. sapiens	9055	H. sapiens	1.0	1.0	1.0	0.0	0.0	0.0	0.0	0.0	0.0	1.0	0.0	0.0	0.0	0.0	0.0	0.0	0.0	0.0	0.0	0.0	0.0	0.0	0.0	0.0	0.0	0.0	0.0	0.0	0.0	0.0	0.0	0.0	0.0	0.0	0.0	0.0	0.0	0.0	0.0	0.0
ALMS1	7840	symbol	H. sapiens	7840	H. sapiens	0.0	1.0	1.0	0.0	1.0	0.0	0.0	0.0	0.0	0.0	0.0	0.0	0.0	0.0	0.0	0.0	0.0	0.0	0.0	0.0	0.0	0.0	0.0	0.0	0.0	0.0	0.0	0.0	1.0	0.0	0.0	1.0	0.0	0.0	0.0	0.0	0.0	0.0	0.0	0.0
HTT	3064	symbol	H. sapiens	3064	H. sapiens	0.0	1.0	0.0	0.0	1.0	0.0	0.0	0.0	0.0	1.0	0.0	1.0	0.0	0.0	0.0	0.0	0.0	0.0	0.0	0.0	0.0	0.0	0.0	0.0	1.0	0.0	1.0	0.0	1.0	0.0	0.0	0.0	0.0	0.0	1.0	0.0	0.0	0.0	0.0	1.0
EXOC4	60412	symbol	H. sapiens	60412	H. sapiens	0.0	0.0	0.0	0.0	1.0	0.0	0.0	0.0	0.0	0.0	0.0	0.0	0.0	1.0	0.0	0.0	0.0	1.0	0.0	0.0	0.0	0.0	0.0	0.0	0.0	0.0	0.0	0.0	1.0	0.0	0.0	0.0	0.0	0.0	0.0	0.0	0.0	0.0	0.0	0.0
HP1BP3	50809	symbol	H. sapiens	50809	H. sapiens	0.0	0.0	0.0	0.0	0.0	0.0	1.0	0.0	0.0	0.0	0.0	1.0	0.0	0.0	0.0	0.0	1.0	0.0	0.0	0.0	1.0	0.0	0.0	0.0	0.0	0.0	0.0	0.0	0.0	0.0	0.0	0.0	0.0	0.0	0.0	0.0	0.0	0.0	0.0	0.0
SMYD3	64754	symbol	H. sapiens	64754	H. sapiens	0.0	0.0	0.0	0.0	0.0	0.0	1.0	0.0	0.0	0.0	0.0	0.0	0.0	0.0	0.0	0.0	0.0	0.0	0.0	0.0	1.0	0.0	1.0	0.0	0.0	0.0	0.0	0.0	0.0	0.0	0.0	0.0	1.0	0.0	0.0	0.0	0.0	0.0	1.0	0.0
WDR35	57539	symbol	H. sapiens	57539	H. sapiens	0.0	1.0	0.0	0.0	0.0	0.0	0.0	0.0	0.0	0.0	1.0	1.0	0.0	0.0	0.0	0.0	0.0	0.0	0.0	0.0	0.0	0.0	1.0	0.0	1.0	0.0	0.0	0.0	1.0	0.0	1.0	0.0	0.0	0.0	0.0	0.0	0.0	0.0	0.0	0.0
PIM1	5292	symbol	H. sapiens	5292	H. sapiens	0.0	0.0	0.0	0.0	0.0	0.0	0.0	0.0	0.0	0.0	0.0	0.0	0.0	0.0	0.0	1.0	0.0	0.0	0.0	1.0	0.0	0.0	1.0	0.0	0.0	0.0	0.0	0.0	0.0	0.0	0.0	0.0	1.0	0.0	0.0	0.0	0.0	1.0	0.0	0.0
BLM	641	symbol	H. sapiens	641	H. sapiens	1.0	0.0	1.0	1.0	0.0	1.0	1.0	0.0	1.0	1.0	0.0	0.0	0.0	0.0	0.0	0.0	1.0	1.0	1.0	0.0	0.0	0.0	1.0	0.0	0.0	0.0	0.0	1.0	0.0	0.0	0.0	0.0	0.0	0.0	0.0	0.0	0.0	0.0	0.0	0.0
LMNB1	4001	symbol	H. sapiens	4001	H. sapiens	0.0	0.0	0.0	0.0	0.0	0.0	0.0	0.0	0.0	0.0	0.0	0.0	0.0	0.0	0.0	0.0	0.0	0.0	0.0	0.0	0.0	0.0	0.0	0.0	0.0	0.0	0.0	0.0	0.0	0.0	0.0	0.0	0.0	0.0	0.0	0.0	0.0	0.0	0.0	0.0
HMMR	3161	symbol	H. sapiens	3161	H. sapiens	0.0	0.0	1.0	0.0	0.0	0.0	0.0	0.0	0.0	0.0	0.0	0.0	0.0	0.0	0.0	0.0	0.0	0.0	0.0	0.0	0.0	0.0	0.0	0.0	0.0	0.0	0.0	0.0	0.0	0.0	0.0	0.0	0.0	0.0	0.0	0.0	0.0	0.0	0.0	0.0
PKD1L2	114780	symbol	H. sapiens	114780	H. sapiens	0.0	0.0	0.0	0.0	0.0	0.0	0.0	0.0	0.0	0.0	0.0	0.0	0.0	0.0	0.0	0.0	0.0	0.0	0.0	0.0	0.0	0.0	0.0	0.0	0.0	0.0	0.0	0.0	0.0	0.0	0.0	0.0	0.0	0.0	0.0	0.0	0.0	0.0	0.0	0.0
FGFR3	2261	symbol	H. sapiens	2261	H. sapiens	0.0	0.0	0.0	0.0	0.0	0.0	0.0	0.0	0.0	0.0	0.0	0.0	0.0	0.0	0.0	1.0	0.0	0.0	1.0	0.0	0.0	0.0	0.0	0.0	1.0	1.0	0.0	0.0	0.0	0.0	1.0	0.0	0.0	0.0	0.0	0.0	0.0	0.0	0.0	0.0
PTPN3	5774	symbol	H. sapiens	5774	H. sapiens	0.0	0.0	1.0	1.0	0.0	0.0	0.0	0.0	0.0	0.0	1.0	0.0	0.0	0.0	0.0	0.0	1.0	0.0	0.0	0.0	0.0	0.0	0.0	0.0	0.0	0.0	0.0	0.0	0.0	0.0	0.0	0.0	0.0	0.0	1.0	0.0	0.0	0.0	0.0	0.0
GLB1L2	89944	symbol	H. sapiens	89944	H. sapiens	0.0	0.0	0.0	0.0	0.0	0.0	0.0	0.0	0.0	0.0	0.0	0.0	0.0	0.0	0.0	0.0	0.0	0.0	0.0	0.0	0.0	0.0	0.0	0.0	0.0	0.0	0.0	0.0	0.0	0.0	0.0	0.0	0.0	0.0	0.0	0.0	0.0	0.0	0.0	0.0
KNL1	57082	symbol	H. sapiens	57082	H. sapiens	1.0	0.0	0.0	0.0	0.0	0.0	1.0	0.0	0.0	1.0	0.0	0.0	0.0	0.0	0.0	0.0	0.0	0.0	0.0	0.0	1.0	0.0	0.0	0.0	0.0	0.0	0.0	0.0	0.0	0.0	0.0	0.0	0.0	0.0	0.0	0.0	0.0	0.0	0.0	0.0
ADAM9	8754	symbol	H. sapiens	8754	H. sapiens	0.0	0.0	0.0	0.0	0.0	0.0	0.0	0.0	0.0	0.0	0.0	0.0	1.0	0.0	0.0	0.0	0.0	0.0	0.0	1.0	0.0	0.0	1.0	0.0	0.0	1.0	0.0	0.0	0.0	0.0	0.0	0.0	0.0	0.0	1.0	0.0	0.0	0.0	0.0	0.0
DBN1	1627	symbol	H. sapiens	1627	H. sapiens	0.0	1.0	0.0	0.0	0.0	0.0	0.0	0.0	0.0	0.0	0.0	1.0	0.0	0.0	0.0	1.0	0.0	0.0	0.0	1.0	0.0	1.0	0.0	0.0	0.0	0.0	0.0	0.0	0.0	0.0	0.0	1.0	0.0	0.0	0.0	0.0	0.0	0.0	0.0	0.0
DEPTOR	64798	symbol	H. sapiens	64798	H. sapiens	0.0	0.0	0.0	0.0	0.0	0.0	0.0	0.0	0.0	0.0	0.0	1.0	0.0	0.0	0.0	0.0	0.0	0.0	0.0	0.0	0.0	0.0	0.0	0.0	1.0	0.0	0.0	0.0	0.0	1.0	0.0	0.0	0.0	0.0	0.0	0.0	0.0	0.0	0.0	0.0
PLA2G12A	81579	symbol	H. sapiens	81579	H. sapiens	0.0	0.0	0.0	0.0	0.0	0.0	0.0	0.0	0.0	0.0	0.0	0.0	0.0	0.0	0.0	0.0	0.0	0.0	0.0	0.0	0.0	0.0	0.0	0.0	0.0	0.0	0.0	0.0	0.0	0.0	0.0	0.0	0.0	1.0	0.0	0.0	0.0	0.0	0.0	0.0
CCDC93	54520	symbol	H. sapiens	54520	H. sapiens	0.0	0.0	0.0	0.0	0.0	0.0	0.0	0.0	0.0	0.0	0.0	0.0	0.0	0.0	0.0	0.0	0.0	0.0	0.0	0.0	0.0	0.0	0.0	0.0	0.0	0.0	0.0	0.0	0.0	0.0	0.0	0.0	0.0	0.0	0.0	0.0	0.0	0.0	0.0	0.0
KIF14	9928	symbol	H. sapiens	9928	H. sapiens	1.0	1.0	1.0	1.0	1.0	0.0	0.0	0.0	0.0	1.0	0.0	1.0	1.0	0.0	1.0	0.0	0.0	0.0	1.0	0.0	0.0	1.0	0.0	0.0	0.0	0.0	0.0	0.0	0.0	0.0	1.0	1.0	0.0	0.0	1.0	0.0	0.0	0.0	1.0	1.0
RPS3A	6189	symbol	H. sapiens	6189	H. sapiens	0.0	0.0	0.0	0.0	0.0	0.0	0.0	0.0	0.0	0.0	0.0	0.0	0.0	1.0	0.0	0.0	0.0	0.0	0.0	0.0	0.0	0.0	0.0	0.0	0.0	0.0	0.0	0.0	0.0	0.0	0.0	0.0	0.0	0.0	0.0	0.0	0.0	0.0	0.0	0.0
GGA1	26088	symbol	H. sapiens	26088	H. sapiens	0.0	0.0	0.0	0.0	0.0	0.0	0.0	0.0	0.0	0.0	0.0	0.0	0.0	1.0	0.0	0.0	0.0	0.0	0.0	0.0	0.0	0.0	0.0	0.0	0.0	0.0	0.0	0.0	0.0	0.0	0.0	0.0	0.0	0.0	1.0	0.0	0.0	0.0	0.0	0.0
ASPM	259266	symbol	H. sapiens	259266	H. sapiens	1.0	1.0	0.0	0.0	1.0	0.0	0.0	1.0	0.0	1.0	0.0	1.0	0.0	0.0	0.0	1.0	0.0	1.0	1.0	0.0	0.0	0.0	0.0	0.0	0.0	0.0	1.0	0.0	0.0	0.0	0.0	0.0	0.0	0.0	0.0	0.0	0.0	0.0	0.0	0.0
NEBL	10529	symbol	H. sapiens	10529	H. sapiens	0.0	0.0	0.0	0.0	0.0	0.0	0.0	0.0	0.0	0.0	0.0	0.0	0.0	0.0	0.0	0.0	0.0	0.0	0.0	1.0	0.0	0.0	0.0	0.0	0.0	0.0	0.0	0.0	0.0	0.0	0.0	1.0	1.0	0.0	0.0	0.0	0.0	0.0	0.0	0.0
WHRN	25861	symbol	H. sapiens	25861	H. sapiens	0.0	0.0	0.0	0.0	0.0	1.0	0.0	0.0	0.0	0.0	0.0	1.0	1.0	0.0	0.0	0.0	0.0	1.0	0.0	1.0	0.0	0.0	0.0	1.0	0.0	0.0	0.0	0.0	0.0	0.0	0.0	0.0	0.0	0.0	0.0	1.0	0.0	0.0	0.0	0.0
PITPNM2	57605	symbol	H. sapiens	57605	H. sapiens	0.0	0.0	0.0	0.0	0.0	0.0	0.0	0.0	0.0	0.0	0.0	0.0	0.0	0.0	0.0	0.0	0.0	0.0	0.0	0.0	0.0	0.0	0.0	0.0	0.0	0.0	0.0	0.0	0.0	0.0	0.0	0.0	0.0	0.0	0.0	0.0	0.0	0.0	0.0	0.0
MTHFD1	4522	symbol	H. sapiens	4522	H. sapiens	0.0	0.0	0.0	0.0	0.0	0.0	0.0	0.0	0.0	0.0	0.0	0.0	0.0	0.0	0.0	0.0	0.0	1.0	0.0	1.0	0.0	0.0	0.0	1.0	0.0	0.0	0.0	0.0	0.0	0.0	0.0	0.0	0.0	1.0	0.0	0.0	0.0	0.0	0.0	0.0
CCDC149	91050	symbol	H. sapiens	91050	H. sapiens	0.0	0.0	0.0	0.0	0.0	0.0	0.0	0.0	0.0	0.0	0.0	0.0	0.0	0.0	0.0	0.0	0.0	0.0	0.0	0.0	0.0	0.0	0.0	0.0	0.0	0.0	0.0	0.0	0.0	0.0	0.0	0.0	0.0	0.0	0.0	0.0	0.0	0.0	0.0	0.0
NFIA	4774	symbol	H. sapiens	4774	H. sapiens	0.0	0.0	0.0	0.0	0.0	1.0	0.0	0.0	0.0	0.0	0.0	0.0	0.0	0.0	0.0	0.0	0.0	1.0	1.0	0.0	0.0	0.0	0.0	0.0	0.0	0.0	0.0	0.0	0.0	0.0	0.0	0.0	0.0	0.0	0.0	0.0	0.0	0.0	0.0	0.0
UNK	85451	symbol	H. sapiens	85451	H. sapiens	0.0	0.0	0.0	0.0	0.0	0.0	0.0	0.0	0.0	0.0	0.0	1.0	0.0	1.0	0.0	0.0	0.0	0.0	0.0	1.0	0.0	0.0	0.0	0.0	0.0	0.0	0.0	0.0	0.0	0.0	0.0	0.0	0.0	0.0	0.0	0.0	0.0	0.0	0.0	0.0
ABCB7	22	symbol	H. sapiens	22	H. sapiens	0.0	0.0	0.0	0.0	0.0	0.0	0.0	0.0	0.0	0.0	0.0	0.0	0.0	0.0	0.0	0.0	0.0	0.0	0.0	0.0	0.0	0.0	0.0	0.0	0.0	0.0	0.0	0.0	0.0	0.0	0.0	0.0	0.0	0.0	0.0	0.0	0.0	0.0	0.0	0.0
ZHX3	23051	symbol	H. sapiens	23051	H. sapiens	0.0	0.0	0.0	0.0	0.0	0.0	0.0	0.0	0.0	0.0	0.0	0.0	0.0	0.0	0.0	0.0	0.0	0.0	0.0	0.0	0.0	0.0	0.0	0.0	0.0	0.0	0.0	0.0	0.0	0.0	0.0	0.0	0.0	0.0	0.0	0.0	0.0	0.0	0.0	0.0
TBRG4	9238	symbol	H. sapiens	9238	H. sapiens	0.0	0.0	0.0	0.0	0.0	0.0	0.0	0.0	0.0	0.0	0.0	0.0	0.0	1.0	0.0	0.0	1.0	0.0	0.0	0.0	0.0	0.0	0.0	0.0	0.0	0.0	0.0	0.0	0.0	0.0	0.0	0.0	0.0	0.0	0.0	0.0	0.0	0.0	0.0	0.0
Sep-05						nan	nan	nan	nan	nan	nan	nan	nan	nan	nan	nan	nan	nan	nan	nan	nan	nan	nan	nan	nan	nan	nan	nan	nan	nan	nan	nan	nan	nan	nan	nan	nan	nan	nan	nan	nan	nan	nan	nan	nan
LARGE1	9215	symbol	H. sapiens	9215	H. sapiens	0.0	0.0	0.0	0.0	0.0	1.0	0.0	0.0	0.0	0.0	1.0	0.0	0.0	0.0	0.0	1.0	0.0	0.0	0.0	0.0	0.0	0.0	0.0	0.0	0.0	0.0	0.0	0.0	0.0	0.0	0.0	0.0	1.0	0.0	0.0	0.0	0.0	0.0	0.0	0.0
KIF20A	10112	symbol	H. sapiens	10112	H. sapiens	1.0	1.0	1.0	0.0	0.0	0.0	0.0	0.0	0.0	1.0	0.0	0.0	0.0	0.0	0.0	0.0	0.0	0.0	0.0	0.0	0.0	0.0	0.0	0.0	0.0	0.0	0.0	0.0	0.0	0.0	0.0	0.0	0.0	0.0	0.0	0.0	0.0	0.0	0.0	0.0
POLD2	5425	symbol	H. sapiens	5425	H. sapiens	0.0	0.0	0.0	0.0	0.0	1.0	0.0	0.0	1.0	0.0	0.0	0.0	0.0	0.0	0.0	0.0	0.0	0.0	0.0	0.0	0.0	0.0	0.0	0.0	0.0	0.0	0.0	0.0	0.0	0.0	0.0	0.0	0.0	0.0	0.0	0.0	0.0	0.0	0.0	0.0
SDCCAG8	10806	symbol	H. sapiens	10806	H. sapiens	0.0	1.0	1.0	0.0	1.0	0.0	0.0	0.0	0.0	0.0	0.0	1.0	0.0	0.0	0.0	0.0	0.0	1.0	0.0	0.0	0.0	0.0	0.0	0.0	0.0	0.0	0.0	0.0	1.0	0.0	0.0	0.0	0.0	0.0	0.0	0.0	0.0	0.0	0.0	0.0
TES	26136	symbol	H. sapiens	26136	H. sapiens	0.0	0.0	0.0	0.0	0.0	0.0	0.0	0.0	0.0	0.0	0.0	0.0	0.0	0.0	0.0	0.0	0.0	0.0	0.0	0.0	0.0	0.0	0.0	0.0	0.0	0.0	0.0	0.0	0.0	0.0	0.0	0.0	0.0	0.0	0.0	0.0	0.0	0.0	0.0	0.0
NEK6	10783	symbol	H. sapiens	10783	H. sapiens	1.0	1.0	1.0	1.0	0.0	0.0	0.0	0.0	0.0	1.0	0.0	0.0	0.0	0.0	0.0	0.0	0.0	0.0	0.0	0.0	0.0	0.0	0.0	0.0	0.0	0.0	0.0	0.0	0.0	1.0	0.0	0.0	0.0	0.0	0.0	0.0	0.0	0.0	1.0	1.0
KLF13	51621	symbol	H. sapiens	51621	H. sapiens	0.0	0.0	0.0	0.0	0.0	0.0	0.0	0.0	0.0	0.0	0.0	0.0	0.0	0.0	0.0	0.0	0.0	0.0	0.0	0.0	0.0	0.0	0.0	0.0	0.0	0.0	0.0	0.0	0.0	0.0	0.0	0.0	0.0	0.0	0.0	0.0	0.0	1.0	0.0	0.0
NCAPG2	54892	symbol	H. sapiens	54892	H. sapiens	1.0	0.0	0.0	0.0	0.0	0.0	1.0	0.0	0.0	0.0	0.0	0.0	0.0	0.0	0.0	1.0	0.0	0.0	0.0	1.0	0.0	0.0	0.0	0.0	0.0	0.0	0.0	0.0	0.0	0.0	0.0	0.0	0.0	0.0	0.0	0.0	0.0	1.0	0.0	0.0
GMDS	2762	symbol	H. sapiens	2762	H. sapiens	0.0	0.0	0.0	0.0	0.0	0.0	0.0	0.0	0.0	0.0	0.0	0.0	0.0	0.0	0.0	0.0	0.0	0.0	0.0	0.0	0.0	0.0	0.0	1.0	0.0	0.0	0.0	0.0	0.0	0.0	0.0	0.0	0.0	0.0	0.0	0.0	0.0	0.0	0.0	0.0
TTF2	8458	symbol	H. sapiens	8458	H. sapiens	0.0	0.0	0.0	0.0	0.0	0.0	0.0	0.0	0.0	0.0	0.0	0.0	0.0	0.0	0.0	0.0	0.0	0.0	0.0	0.0	0.0	0.0	0.0	0.0	0.0	0.0	0.0	0.0	0.0	0.0	0.0	0.0	0.0	0.0	0.0	0.0	0.0	0.0	0.0	0.0
EIF1AX	1964	symbol	H. sapiens	1964	H. sapiens	0.0	0.0	0.0	0.0	0.0	0.0	0.0	0.0	0.0	0.0	0.0	0.0	0.0	1.0	0.0	0.0	0.0	0.0	0.0	0.0	0.0	0.0	0.0	0.0	0.0	0.0	0.0	0.0	0.0	0.0	0.0	0.0	0.0	0.0	0.0	0.0	0.0	0.0	0.0	0.0
TBCD	6904	symbol	H. sapiens	6904	H. sapiens	0.0	1.0	0.0	1.0	0.0	0.0	0.0	0.0	0.0	0.0	0.0	1.0	1.0	0.0	0.0	0.0	0.0	0.0	0.0	0.0	0.0	1.0	0.0	0.0	0.0	0.0	0.0	0.0	0.0	0.0	1.0	1.0	0.0	0.0	0.0	1.0	0.0	0.0	0.0	0.0
UNC5A	90249	symbol	H. sapiens	90249	H. sapiens	0.0	0.0	0.0	0.0	0.0	0.0	0.0	0.0	0.0	0.0	0.0	1.0	0.0	0.0	0.0	0.0	0.0	0.0	0.0	0.0	0.0	0.0	0.0	0.0	0.0	0.0	0.0	0.0	0.0	0.0	0.0	0.0	0.0	0.0	0.0	0.0	0.0	0.0	0.0	0.0
RPS18	6222	symbol	H. sapiens	6222	H. sapiens	0.0	0.0	0.0	0.0	0.0	0.0	0.0	0.0	0.0	0.0	0.0	0.0	0.0	1.0	0.0	0.0	0.0	0.0	0.0	0.0	0.0	0.0	0.0	0.0	0.0	0.0	0.0	0.0	0.0	0.0	0.0	0.0	0.0	0.0	0.0	0.0	0.0	0.0	0.0	0.0
PPP1R12B	4660	symbol	H. sapiens	4660	H. sapiens	0.0	0.0	1.0	0.0	0.0	0.0	0.0	0.0	0.0	0.0	0.0	0.0	0.0	0.0	0.0	0.0	0.0	0.0	0.0	0.0	0.0	0.0	0.0	0.0	0.0	0.0	0.0	0.0	0.0	0.0	0.0	0.0	0.0	0.0	0.0	0.0	0.0	0.0	0.0	0.0
MYC	4609	symbol	H. sapiens	4609	H. sapiens	1.0	0.0	1.0	1.0	0.0	1.0	0.0	0.0	0.0	1.0	0.0	0.0	0.0	0.0	0.0	0.0	1.0	1.0	1.0	0.0	1.0	0.0	0.0	1.0	0.0	1.0	0.0	1.0	0.0	1.0	1.0	0.0	0.0	0.0	0.0	0.0	0.0	1.0	0.0	1.0
NUSAP1	51203	symbol	H. sapiens	51203	H. sapiens	1.0	1.0	1.0	1.0	1.0	0.0	1.0	0.0	0.0	1.0	0.0	0.0	0.0	0.0	1.0	0.0	0.0	0.0	0.0	0.0	0.0	0.0	0.0	0.0	0.0	0.0	1.0	0.0	0.0	0.0	0.0	0.0	0.0	0.0	0.0	0.0	0.0	0.0	0.0	0.0
SUCLG2	8801	symbol	H. sapiens	8801	H. sapiens	0.0	0.0	0.0	0.0	0.0	0.0	0.0	0.0	0.0	0.0	0.0	0.0	0.0	0.0	0.0	0.0	0.0	0.0	0.0	0.0	0.0	0.0	0.0	0.0	0.0	0.0	0.0	0.0	0.0	0.0	0.0	0.0	0.0	1.0	0.0	0.0	0.0	0.0	0.0	0.0
SRD5A1	6715	symbol	H. sapiens	6715	H. sapiens	0.0	0.0	0.0	0.0	0.0	0.0	0.0	0.0	0.0	0.0	1.0	0.0	0.0	1.0	0.0	0.0	0.0	1.0	0.0	0.0	0.0	0.0	1.0	0.0	0.0	1.0	0.0	0.0	0.0	0.0	0.0	0.0	0.0	0.0	0.0	0.0	0.0	0.0	0.0	0.0
ZNF217	7764	symbol	H. sapiens	7764	H. sapiens	0.0	0.0	0.0	0.0	0.0	0.0	0.0	0.0	0.0	0.0	0.0	0.0	0.0	0.0	0.0	0.0	0.0	0.0	0.0	0.0	0.0	0.0	0.0	0.0	0.0	0.0	0.0	0.0	0.0	0.0	0.0	0.0	0.0	0.0	0.0	0.0	0.0	0.0	0.0	0.0
EEF1AKMT1	221143	symbol	H. sapiens	221143	H. sapiens	0.0	0.0	0.0	0.0	0.0	0.0	0.0	0.0	0.0	0.0	0.0	0.0	0.0	0.0	0.0	0.0	0.0	0.0	0.0	0.0	0.0	0.0	0.0	0.0	0.0	0.0	0.0	0.0	0.0	0.0	0.0	0.0	0.0	0.0	0.0	0.0	0.0	0.0	0.0	0.0
FIGNL1	63979	symbol	H. sapiens	63979	H. sapiens	1.0	1.0	0.0	0.0	0.0	1.0	0.0	1.0	1.0	0.0	0.0	0.0	0.0	0.0	0.0	0.0	0.0	0.0	0.0	0.0	0.0	1.0	0.0	0.0	1.0	0.0	0.0	1.0	0.0	1.0	0.0	1.0	0.0	0.0	0.0	0.0	0.0	0.0	0.0	0.0
MICAL2	9645	symbol	H. sapiens	9645	H. sapiens	0.0	0.0	0.0	0.0	0.0	0.0	0.0	0.0	0.0	0.0	0.0	0.0	0.0	0.0	0.0	0.0	0.0	1.0	0.0	1.0	0.0	0.0	0.0	0.0	0.0	0.0	0.0	0.0	0.0	0.0	0.0	1.0	0.0	0.0	0.0	0.0	0.0	0.0	0.0	1.0
CHST8	64377	symbol	H. sapiens	64377	H. sapiens	0.0	0.0	0.0	0.0	0.0	0.0	0.0	0.0	0.0	0.0	0.0	0.0	0.0	0.0	0.0	0.0	0.0	0.0	0.0	0.0	0.0	0.0	0.0	0.0	0.0	0.0	0.0	0.0	0.0	0.0	0.0	0.0	0.0	0.0	0.0	0.0	0.0	0.0	0.0	0.0
FLT1	2321	symbol	H. sapiens	2321	H. sapiens	0.0	0.0	0.0	0.0	0.0	0.0	0.0	0.0	0.0	0.0	0.0	1.0	0.0	0.0	0.0	0.0	0.0	1.0	0.0	0.0	0.0	0.0	0.0	0.0	0.0	1.0	0.0	0.0	0.0	0.0	1.0	0.0	0.0	0.0	0.0	0.0	0.0	0.0	0.0	0.0
MYBL1	4603	symbol	H. sapiens	4603	H. sapiens	1.0	0.0	0.0	0.0	0.0	0.0	0.0	1.0	0.0	0.0	0.0	0.0	0.0	0.0	0.0	0.0	0.0	0.0	0.0	0.0	0.0	0.0	0.0	0.0	0.0	0.0	0.0	0.0	0.0	0.0	0.0	0.0	0.0	0.0	0.0	0.0	0.0	0.0	0.0	0.0
RPL5	6125	symbol	H. sapiens	6125	H. sapiens	0.0	0.0	0.0	0.0	0.0	0.0	0.0	0.0	0.0	0.0	0.0	0.0	0.0	1.0	0.0	0.0	0.0	0.0	1.0	0.0	0.0	0.0	0.0	0.0	0.0	0.0	0.0	0.0	0.0	0.0	0.0	0.0	0.0	0.0	1.0	0.0	0.0	0.0	0.0	0.0
FAM72D	728833	symbol	H. sapiens	728833	H. sapiens	0.0	0.0	0.0	0.0	0.0	0.0	0.0	0.0	0.0	0.0	0.0	0.0	0.0	0.0	0.0	0.0	0.0	0.0	0.0	0.0	0.0	0.0	0.0	0.0	0.0	0.0	0.0	0.0	0.0	0.0	0.0	0.0	0.0	0.0	0.0	0.0	0.0	0.0	0.0	0.0
PLXNA4	91584	symbol	H. sapiens	91584	H. sapiens	0.0	0.0	0.0	0.0	0.0	0.0	0.0	0.0	0.0	0.0	0.0	1.0	1.0	0.0	0.0	1.0	0.0	0.0	0.0	0.0	0.0	0.0	0.0	0.0	0.0	0.0	0.0	0.0	0.0	0.0	1.0	0.0	0.0	0.0	0.0	0.0	0.0	0.0	0.0	0.0
PPFIA1	8500	symbol	H. sapiens	8500	H. sapiens	0.0	1.0	0.0	1.0	0.0	0.0	0.0	0.0	0.0	0.0	0.0	0.0	1.0	1.0	0.0	0.0	0.0	0.0	0.0	0.0	0.0	0.0	0.0	0.0	0.0	0.0	0.0	0.0	0.0	0.0	0.0	1.0	0.0	0.0	0.0	0.0	0.0	0.0	0.0	0.0
HMGB2	3148	symbol	H. sapiens	3148	H. sapiens	0.0	0.0	0.0	0.0	0.0	1.0	1.0	0.0	1.0	0.0	0.0	1.0	0.0	1.0	0.0	0.0	0.0	0.0	0.0	0.0	1.0	0.0	1.0	0.0	1.0	0.0	0.0	0.0	0.0	0.0	1.0	0.0	0.0	0.0	0.0	0.0	1.0	1.0	0.0	1.0
RPL9P9	254948	gene_synonym	H. sapiens	254948	H. sapiens	0.0	0.0	0.0	0.0	0.0	0.0	0.0	0.0	0.0	0.0	0.0	0.0	0.0	0.0	0.0	0.0	0.0	0.0	0.0	0.0	0.0	0.0	0.0	0.0	0.0	0.0	0.0	0.0	0.0	0.0	0.0	0.0	0.0	0.0	0.0	0.0	0.0	0.0	0.0	0.0
PXYLP1	92370	symbol	H. sapiens	92370	H. sapiens	0.0	0.0	0.0	0.0	0.0	0.0	0.0	0.0	0.0	0.0	0.0	0.0	0.0	0.0	0.0	0.0	0.0	0.0	0.0	0.0	0.0	0.0	0.0	0.0	0.0	0.0	0.0	0.0	0.0	0.0	0.0	0.0	0.0	0.0	0.0	0.0	0.0	0.0	0.0	0.0
CABLES1	91768	symbol	H. sapiens	91768	H. sapiens	1.0	0.0	0.0	0.0	0.0	0.0	0.0	0.0	0.0	0.0	0.0	0.0	0.0	0.0	0.0	0.0	0.0	0.0	0.0	0.0	0.0	0.0	0.0	0.0	0.0	0.0	0.0	0.0	0.0	0.0	0.0	0.0	0.0	0.0	0.0	0.0	0.0	0.0	0.0	0.0
LAMA3	3909	symbol	H. sapiens	3909	H. sapiens	0.0	0.0	0.0	0.0	0.0	0.0	0.0	0.0	0.0	0.0	0.0	0.0	1.0	0.0	0.0	0.0	0.0	1.0	0.0	0.0	0.0	0.0	0.0	0.0	0.0	0.0	0.0	0.0	0.0	0.0	0.0	0.0	0.0	0.0	0.0	0.0	0.0	0.0	0.0	0.0
METTL21A	151194	symbol	H. sapiens	151194	H. sapiens	0.0	0.0	0.0	0.0	0.0	0.0	0.0	0.0	0.0	0.0	0.0	0.0	0.0	0.0	0.0	0.0	0.0	0.0	0.0	0.0	0.0	0.0	0.0	0.0	0.0	0.0	0.0	0.0	0.0	0.0	0.0	0.0	0.0	0.0	0.0	0.0	0.0	0.0	0.0	0.0
CADPS2	93664	symbol	H. sapiens	93664	H. sapiens	0.0	0.0	0.0	0.0	1.0	0.0	0.0	0.0	0.0	0.0	0.0	0.0	0.0	0.0	0.0	0.0	0.0	0.0	0.0	0.0	0.0	0.0	0.0	0.0	0.0	0.0	0.0	0.0	0.0	0.0	0.0	0.0	0.0	0.0	0.0	0.0	0.0	0.0	0.0	0.0
RAD54B	25788	symbol	H. sapiens	25788	H. sapiens	1.0	0.0	0.0	0.0	0.0	0.0	1.0	1.0	1.0	0.0	0.0	0.0	0.0	0.0	0.0	0.0	0.0	0.0	0.0	0.0	0.0	0.0	0.0	0.0	0.0	0.0	0.0	0.0	0.0	0.0	0.0	0.0	0.0	0.0	0.0	0.0	0.0	0.0	0.0	0.0
GCSH	2653	symbol	H. sapiens	2653	H. sapiens	0.0	0.0	0.0	0.0	0.0	0.0	0.0	0.0	0.0	0.0	0.0	0.0	0.0	0.0	0.0	0.0	0.0	0.0	0.0	0.0	0.0	0.0	0.0	0.0	0.0	0.0	0.0	0.0	0.0	0.0	0.0	0.0	0.0	0.0	0.0	0.0	0.0	0.0	0.0	0.0
TXNDC5	81567	symbol	H. sapiens	81567	H. sapiens	0.0	0.0	0.0	0.0	0.0	0.0	0.0	0.0	0.0	0.0	0.0	0.0	0.0	0.0	0.0	0.0	0.0	0.0	0.0	0.0	0.0	0.0	0.0	0.0	0.0	0.0	0.0	0.0	0.0	0.0	0.0	0.0	0.0	0.0	0.0	0.0	0.0	0.0	0.0	0.0
AURKA	6790	symbol	H. sapiens	6790	H. sapiens	1.0	1.0	1.0	1.0	1.0	0.0	0.0	1.0	0.0	1.0	1.0	1.0	0.0	0.0	1.0	1.0	1.0	0.0	1.0	0.0	0.0	0.0	0.0	0.0	0.0	0.0	1.0	0.0	1.0	0.0	0.0	0.0	0.0	0.0	1.0	0.0	0.0	0.0	1.0	0.0
FBXL17	64839	symbol	H. sapiens	64839	H. sapiens	0.0	0.0	0.0	0.0	0.0	0.0	0.0	0.0	0.0	0.0	0.0	0.0	0.0	0.0	0.0	0.0	0.0	0.0	0.0	0.0	0.0	0.0	0.0	0.0	0.0	0.0	0.0	0.0	0.0	0.0	0.0	0.0	0.0	0.0	1.0	0.0	0.0	0.0	0.0	0.0
PCSK6	5046	symbol	H. sapiens	5046	H. sapiens	0.0	0.0	0.0	0.0	0.0	0.0	0.0	0.0	0.0	0.0	0.0	0.0	0.0	0.0	0.0	0.0	0.0	0.0	0.0	1.0	0.0	0.0	0.0	1.0	0.0	1.0	0.0	0.0	0.0	0.0	0.0	0.0	0.0	0.0	0.0	0.0	0.0	0.0	0.0	0.0
ZFP36L1	677	symbol	H. sapiens	677	H. sapiens	0.0	0.0	1.0	1.0	0.0	0.0	0.0	0.0	0.0	0.0	0.0	0.0	0.0	1.0	0.0	1.0	1.0	1.0	0.0	1.0	0.0	0.0	1.0	0.0	0.0	1.0	0.0	1.0	0.0	0.0	0.0	0.0	1.0	0.0	1.0	0.0	0.0	1.0	0.0	0.0
AC019205.3						nan	nan	nan	nan	nan	nan	nan	nan	nan	nan	nan	nan	nan	nan	nan	nan	nan	nan	nan	nan	nan	nan	nan	nan	nan	nan	nan	nan	nan	nan	nan	nan	nan	nan	nan	nan	nan	nan	nan	nan
NUP88	4927	symbol	H. sapiens	4927	H. sapiens	0.0	0.0	0.0	0.0	1.0	0.0	0.0	0.0	0.0	0.0	0.0	0.0	0.0	1.0	0.0	0.0	0.0	0.0	0.0	0.0	0.0	0.0	0.0	0.0	0.0	0.0	0.0	0.0	0.0	1.0	0.0	0.0	0.0	0.0	0.0	0.0	0.0	0.0	0.0	0.0
GINS2	51659	symbol	H. sapiens	51659	H. sapiens	0.0	0.0	0.0	0.0	0.0	1.0	1.0	0.0	1.0	0.0	0.0	0.0	0.0	0.0	0.0	0.0	0.0	0.0	0.0	0.0	0.0	0.0	0.0	0.0	0.0	0.0	0.0	0.0	0.0	0.0	0.0	0.0	0.0	0.0	0.0	0.0	0.0	0.0	0.0	0.0
CELF1	10658	symbol	H. sapiens	10658	H. sapiens	0.0	0.0	0.0	0.0	0.0	0.0	0.0	0.0	0.0	0.0	0.0	0.0	0.0	1.0	0.0	0.0	0.0	0.0	0.0	1.0	0.0	0.0	0.0	0.0	0.0	0.0	0.0	0.0	0.0	0.0	0.0	0.0	0.0	0.0	0.0	0.0	0.0	0.0	0.0	0.0
GLUL	2752	symbol	H. sapiens	2752	H. sapiens	0.0	0.0	0.0	0.0	0.0	0.0	0.0	0.0	0.0	0.0	0.0	0.0	0.0	0.0	0.0	0.0	0.0	0.0	0.0	0.0	0.0	0.0	0.0	0.0	0.0	0.0	0.0	0.0	0.0	0.0	0.0	0.0	0.0	1.0	0.0	0.0	0.0	0.0	0.0	0.0
PHF14	9678	symbol	H. sapiens	9678	H. sapiens	0.0	0.0	0.0	0.0	0.0	0.0	0.0	0.0	0.0	0.0	0.0	0.0	0.0	0.0	0.0	0.0	0.0	1.0	0.0	0.0	0.0	0.0	0.0	0.0	0.0	0.0	0.0	0.0	0.0	0.0	0.0	0.0	0.0	0.0	0.0	0.0	0.0	0.0	0.0	0.0
TXLNG	55787	symbol	H. sapiens	55787	H. sapiens	0.0	0.0	1.0	0.0	0.0	0.0	0.0	0.0	0.0	0.0	0.0	0.0	0.0	0.0	0.0	0.0	0.0	0.0	0.0	0.0	0.0	0.0	0.0	0.0	0.0	0.0	0.0	0.0	0.0	0.0	0.0	0.0	0.0	0.0	0.0	0.0	0.0	0.0	0.0	0.0
AMOTL1	154810	symbol	H. sapiens	154810	H. sapiens	0.0	0.0	0.0	0.0	0.0	0.0	0.0	0.0	0.0	0.0	0.0	0.0	0.0	0.0	0.0	0.0	0.0	0.0	0.0	0.0	0.0	0.0	0.0	0.0	0.0	0.0	0.0	0.0	0.0	0.0	0.0	1.0	0.0	0.0	0.0	0.0	0.0	0.0	0.0	0.0
CYTOR	112597	symbol	H. sapiens	112597	H. sapiens	0.0	0.0	0.0	0.0	0.0	0.0	0.0	0.0	0.0	0.0	0.0	0.0	0.0	0.0	0.0	0.0	0.0	0.0	0.0	0.0	0.0	0.0	0.0	0.0	0.0	0.0	0.0	0.0	0.0	0.0	0.0	0.0	0.0	0.0	0.0	0.0	0.0	0.0	0.0	0.0
WRB	7485	gene_synonym	H. sapiens	7485	H. sapiens	0.0	0.0	0.0	0.0	0.0	0.0	0.0	0.0	0.0	0.0	0.0	0.0	0.0	1.0	0.0	0.0	0.0	0.0	0.0	0.0	0.0	0.0	0.0	0.0	0.0	0.0	0.0	0.0	0.0	0.0	0.0	0.0	0.0	0.0	0.0	0.0	0.0	0.0	0.0	0.0
COTL1	23406	symbol	H. sapiens	23406	H. sapiens	0.0	1.0	0.0	0.0	0.0	0.0	0.0	0.0	0.0	0.0	0.0	1.0	0.0	0.0	0.0	0.0	0.0	0.0	0.0	0.0	0.0	1.0	0.0	0.0	0.0	0.0	0.0	0.0	0.0	0.0	0.0	1.0	0.0	0.0	0.0	0.0	0.0	0.0	0.0	0.0
ZNF664	144348	symbol	H. sapiens	144348	H. sapiens	0.0	0.0	0.0	0.0	0.0	0.0	0.0	0.0	0.0	0.0	0.0	0.0	0.0	0.0	0.0	0.0	0.0	0.0	0.0	0.0	0.0	0.0	0.0	0.0	0.0	0.0	0.0	0.0	0.0	0.0	0.0	0.0	0.0	0.0	0.0	0.0	0.0	0.0	0.0	0.0
ATP5G1	516	gene_synonym	H. sapiens	516	H. sapiens	0.0	0.0	0.0	0.0	0.0	0.0	0.0	0.0	0.0	0.0	0.0	0.0	0.0	0.0	0.0	0.0	0.0	0.0	0.0	0.0	0.0	0.0	0.0	0.0	0.0	0.0	0.0	0.0	0.0	0.0	0.0	0.0	0.0	0.0	0.0	0.0	0.0	0.0	0.0	0.0
THADA	63892	symbol	H. sapiens	63892	H. sapiens	0.0	0.0	0.0	0.0	0.0	0.0	0.0	0.0	0.0	0.0	0.0	0.0	0.0	0.0	0.0	0.0	0.0	0.0	0.0	0.0	0.0	0.0	0.0	0.0	0.0	0.0	0.0	0.0	0.0	0.0	0.0	0.0	0.0	0.0	0.0	0.0	0.0	0.0	0.0	0.0
ZNF185	7739	symbol	H. sapiens	7739	H. sapiens	0.0	0.0	0.0	0.0	0.0	0.0	0.0	0.0	0.0	0.0	0.0	0.0	0.0	0.0	0.0	0.0	0.0	0.0	0.0	0.0	0.0	0.0	0.0	0.0	0.0	0.0	0.0	0.0	0.0	0.0	0.0	0.0	0.0	0.0	0.0	0.0	0.0	0.0	0.0	0.0
FAM53B	9679	symbol	H. sapiens	9679	H. sapiens	0.0	0.0	0.0	0.0	0.0	0.0	0.0	0.0	0.0	0.0	0.0	0.0	0.0	1.0	0.0	0.0	0.0	0.0	0.0	0.0	0.0	0.0	0.0	0.0	0.0	0.0	0.0	0.0	0.0	0.0	0.0	0.0	0.0	0.0	0.0	0.0	0.0	0.0	0.0	0.0
C2CD5	9847	symbol	H. sapiens	9847	H. sapiens	0.0	1.0	0.0	0.0	0.0	0.0	0.0	0.0	0.0	0.0	0.0	0.0	0.0	1.0	0.0	0.0	0.0	0.0	0.0	0.0	0.0	0.0	1.0	0.0	0.0	0.0	0.0	0.0	0.0	0.0	0.0	0.0	0.0	0.0	0.0	0.0	0.0	0.0	0.0	0.0
ZNF850	342892	symbol	H. sapiens	342892	H. sapiens	0.0	0.0	0.0	0.0	0.0	0.0	0.0	0.0	0.0	0.0	0.0	0.0	0.0	0.0	0.0	0.0	0.0	0.0	0.0	0.0	0.0	0.0	0.0	0.0	0.0	0.0	0.0	0.0	0.0	0.0	0.0	0.0	0.0	0.0	0.0	0.0	0.0	0.0	0.0	0.0
GEN1	348654	symbol	H. sapiens	348654	H. sapiens	1.0	1.0	1.0	1.0	0.0	1.0	0.0	0.0	1.0	0.0	0.0	0.0	0.0	0.0	1.0	0.0	1.0	0.0	0.0	0.0	0.0	0.0	0.0	0.0	0.0	0.0	0.0	0.0	1.0	0.0	0.0	0.0	0.0	0.0	0.0	0.0	0.0	0.0	0.0	0.0
NDUFAF2	91942	symbol	H. sapiens	91942	H. sapiens	0.0	0.0	0.0	0.0	0.0	0.0	0.0	0.0	0.0	0.0	0.0	0.0	0.0	0.0	0.0	0.0	0.0	0.0	0.0	0.0	0.0	0.0	0.0	0.0	0.0	0.0	0.0	0.0	0.0	0.0	0.0	0.0	0.0	0.0	0.0	0.0	0.0	0.0	0.0	0.0
PTCD3	55037	symbol	H. sapiens	55037	H. sapiens	0.0	0.0	0.0	0.0	0.0	0.0	0.0	0.0	0.0	0.0	0.0	0.0	0.0	1.0	0.0	0.0	0.0	0.0	0.0	0.0	0.0	0.0	0.0	0.0	0.0	0.0	0.0	0.0	0.0	0.0	0.0	0.0	0.0	0.0	0.0	0.0	0.0	0.0	0.0	1.0
SKP2	6502	symbol	H. sapiens	6502	H. sapiens	0.0	0.0	1.0	0.0	0.0	0.0	0.0	0.0	0.0	0.0	0.0	0.0	0.0	0.0	0.0	0.0	0.0	0.0	1.0	0.0	0.0	0.0	1.0	0.0	0.0	0.0	0.0	0.0	0.0	0.0	0.0	0.0	0.0	0.0	1.0	0.0	0.0	0.0	0.0	0.0
HEG1	57493	symbol	H. sapiens	57493	H. sapiens	0.0	0.0	0.0	0.0	0.0	0.0	0.0	0.0	0.0	0.0	0.0	1.0	1.0	0.0	0.0	1.0	0.0	1.0	0.0	1.0	0.0	0.0	0.0	0.0	0.0	0.0	0.0	0.0	0.0	1.0	1.0	0.0	1.0	0.0	0.0	1.0	0.0	0.0	0.0	0.0
CABIN1	23523	symbol	H. sapiens	23523	H. sapiens	0.0	0.0	0.0	0.0	0.0	0.0	1.0	0.0	0.0	0.0	0.0	0.0	0.0	0.0	0.0	0.0	0.0	0.0	0.0	0.0	1.0	0.0	0.0	0.0	0.0	0.0	0.0	0.0	0.0	0.0	0.0	0.0	0.0	0.0	0.0	0.0	0.0	0.0	0.0	0.0
HECW2	57520	symbol	H. sapiens	57520	H. sapiens	1.0	0.0	1.0	1.0	0.0	0.0	0.0	0.0	0.0	0.0	0.0	1.0	0.0	0.0	0.0	0.0	0.0	0.0	0.0	0.0	0.0	0.0	0.0	0.0	0.0	0.0	0.0	0.0	0.0	0.0	0.0	0.0	0.0	0.0	1.0	0.0	0.0	0.0	0.0	0.0
BARD1	580	symbol	H. sapiens	580	H. sapiens	0.0	0.0	0.0	0.0	0.0	1.0	0.0	0.0	1.0	0.0	0.0	0.0	0.0	0.0	0.0	0.0	1.0	0.0	1.0	0.0	0.0	0.0	0.0	0.0	0.0	0.0	0.0	0.0	0.0	0.0	0.0	0.0	0.0	0.0	1.0	0.0	0.0	0.0	0.0	0.0
ILKAP	80895	symbol	H. sapiens	80895	H. sapiens	0.0	0.0	0.0	0.0	0.0	0.0	0.0	0.0	0.0	0.0	0.0	0.0	0.0	0.0	0.0	0.0	0.0	0.0	0.0	0.0	0.0	0.0	0.0	0.0	0.0	0.0	0.0	0.0	0.0	0.0	0.0	0.0	0.0	0.0	0.0	0.0	0.0	0.0	0.0	0.0
TARSL2	123283	symbol	H. sapiens	123283	H. sapiens	0.0	0.0	0.0	0.0	0.0	0.0	0.0	0.0	0.0	0.0	0.0	0.0	0.0	1.0	0.0	0.0	0.0	0.0	0.0	0.0	0.0	0.0	0.0	0.0	0.0	0.0	0.0	0.0	0.0	0.0	0.0	0.0	0.0	0.0	0.0	0.0	0.0	0.0	0.0	0.0
MKI67	4288	symbol	H. sapiens	4288	H. sapiens	1.0	0.0	1.0	1.0	0.0	0.0	0.0	0.0	0.0	0.0	0.0	0.0	0.0	0.0	0.0	0.0	0.0	0.0	0.0	0.0	0.0	0.0	0.0	0.0	0.0	0.0	0.0	0.0	0.0	0.0	0.0	0.0	0.0	0.0	0.0	0.0	0.0	0.0	0.0	0.0
EEF1B2	1933	symbol	H. sapiens	1933	H. sapiens	0.0	0.0	0.0	0.0	0.0	0.0	0.0	0.0	0.0	0.0	0.0	0.0	0.0	1.0	0.0	0.0	0.0	0.0	0.0	0.0	0.0	0.0	0.0	0.0	0.0	0.0	0.0	0.0	0.0	0.0	0.0	0.0	0.0	0.0	0.0	0.0	0.0	0.0	0.0	0.0
TIGD7	91151	symbol	H. sapiens	91151	H. sapiens	0.0	0.0	0.0	0.0	0.0	0.0	0.0	0.0	0.0	0.0	0.0	0.0	0.0	0.0	0.0	0.0	0.0	0.0	0.0	0.0	0.0	0.0	0.0	0.0	0.0	0.0	0.0	0.0	0.0	0.0	0.0	0.0	0.0	0.0	0.0	0.0	0.0	0.0	0.0	0.0
GLO1	2739	symbol	H. sapiens	2739	H. sapiens	0.0	0.0	0.0	0.0	0.0	0.0	0.0	0.0	0.0	0.0	0.0	0.0	0.0	0.0	0.0	0.0	0.0	0.0	0.0	0.0	0.0	0.0	0.0	0.0	0.0	0.0	0.0	0.0	0.0	0.0	0.0	0.0	0.0	1.0	0.0	0.0	0.0	0.0	0.0	0.0
NHLRC2	374354	symbol	H. sapiens	374354	H. sapiens	0.0	0.0	0.0	0.0	0.0	0.0	0.0	0.0	0.0	0.0	0.0	0.0	0.0	0.0	0.0	0.0	0.0	0.0	0.0	0.0	0.0	0.0	0.0	0.0	0.0	0.0	0.0	0.0	0.0	0.0	0.0	0.0	0.0	0.0	0.0	0.0	0.0	0.0	0.0	0.0
C2CD3	26005	symbol	H. sapiens	26005	H. sapiens	0.0	1.0	0.0	0.0	1.0	0.0	0.0	0.0	0.0	0.0	0.0	0.0	0.0	0.0	0.0	0.0	0.0	1.0	0.0	1.0	0.0	0.0	0.0	0.0	0.0	0.0	0.0	0.0	1.0	0.0	0.0	0.0	0.0	0.0	0.0	0.0	0.0	0.0	0.0	0.0
GGH	8836	symbol	H. sapiens	8836	H. sapiens	0.0	0.0	0.0	0.0	0.0	0.0	0.0	0.0	0.0	0.0	0.0	0.0	0.0	0.0	0.0	0.0	0.0	0.0	0.0	0.0	0.0	0.0	0.0	0.0	0.0	0.0	0.0	0.0	0.0	0.0	0.0	0.0	0.0	1.0	0.0	0.0	0.0	0.0	0.0	0.0
C3orf14	57415	symbol	H. sapiens	57415	H. sapiens	0.0	0.0	0.0	0.0	0.0	0.0	0.0	0.0	0.0	0.0	0.0	0.0	0.0	0.0	0.0	0.0	0.0	0.0	0.0	0.0	0.0	0.0	0.0	0.0	0.0	0.0	0.0	0.0	0.0	0.0	0.0	0.0	0.0	0.0	0.0	0.0	0.0	0.0	0.0	0.0
DNM1	1759	symbol	H. sapiens	1759	H. sapiens	0.0	0.0	0.0	0.0	1.0	0.0	0.0	0.0	0.0	0.0	0.0	0.0	0.0	0.0	0.0	0.0	0.0	0.0	0.0	0.0	0.0	0.0	0.0	0.0	0.0	0.0	0.0	0.0	0.0	0.0	0.0	0.0	0.0	0.0	0.0	0.0	0.0	0.0	0.0	0.0
CBX5	23468	symbol	H. sapiens	23468	H. sapiens	0.0	0.0	1.0	1.0	0.0	0.0	0.0	0.0	0.0	0.0	0.0	0.0	0.0	0.0	0.0	0.0	1.0	0.0	0.0	0.0	0.0	0.0	0.0	0.0	0.0	0.0	0.0	0.0	0.0	0.0	0.0	0.0	0.0	0.0	0.0	0.0	0.0	0.0	0.0	0.0
LYPD1	116372	symbol	H. sapiens	116372	H. sapiens	0.0	0.0	0.0	0.0	0.0	0.0	0.0	0.0	0.0	0.0	0.0	0.0	0.0	1.0	0.0	0.0	0.0	0.0	0.0	0.0	0.0	0.0	1.0	0.0	0.0	0.0	0.0	0.0	0.0	0.0	0.0	0.0	0.0	0.0	0.0	0.0	0.0	0.0	1.0	0.0
SLC30A1	7779	symbol	H. sapiens	7779	H. sapiens	0.0	0.0	0.0	0.0	0.0	0.0	0.0	0.0	0.0	0.0	0.0	0.0	0.0	0.0	0.0	0.0	0.0	0.0	0.0	1.0	0.0	0.0	0.0	0.0	0.0	0.0	0.0	0.0	0.0	0.0	0.0	0.0	0.0	0.0	0.0	0.0	0.0	0.0	0.0	0.0
EXO1	9156	symbol	H. sapiens	9156	H. sapiens	0.0	0.0	0.0	0.0	0.0	1.0	0.0	1.0	1.0	0.0	0.0	0.0	0.0	0.0	0.0	0.0	0.0	0.0	1.0	0.0	0.0	0.0	0.0	0.0	0.0	0.0	0.0	0.0	0.0	0.0	0.0	0.0	0.0	0.0	0.0	0.0	1.0	0.0	0.0	0.0
RB1CC1	9821	symbol	H. sapiens	9821	H. sapiens	0.0	0.0	0.0	0.0	0.0	0.0	0.0	0.0	0.0	0.0	1.0	1.0	0.0	0.0	0.0	0.0	0.0	0.0	0.0	1.0	0.0	0.0	0.0	0.0	1.0	0.0	0.0	0.0	0.0	1.0	0.0	0.0	0.0	0.0	0.0	0.0	0.0	0.0	0.0	1.0
STAG1	10274	symbol	H. sapiens	10274	H. sapiens	1.0	1.0	1.0	1.0	0.0	0.0	0.0	0.0	0.0	1.0	0.0	0.0	0.0	0.0	0.0	0.0	0.0	0.0	0.0	0.0	0.0	0.0	0.0	0.0	0.0	0.0	0.0	0.0	0.0	0.0	0.0	0.0	0.0	0.0	0.0	0.0	0.0	0.0	0.0	0.0
XRRA1	143570	symbol	H. sapiens	143570	H. sapiens	0.0	0.0	0.0	0.0	0.0	0.0	0.0	0.0	0.0	0.0	0.0	0.0	0.0	0.0	0.0	0.0	0.0	0.0	0.0	0.0	0.0	0.0	0.0	0.0	0.0	0.0	0.0	1.0	0.0	0.0	0.0	0.0	0.0	0.0	0.0	0.0	0.0	0.0	0.0	0.0
PTPRG-AS1	100506994	symbol	H. sapiens	100506994	H. sapiens	0.0	0.0	0.0	0.0	0.0	0.0	0.0	0.0	0.0	0.0	0.0	0.0	0.0	0.0	0.0	0.0	0.0	0.0	0.0	0.0	0.0	0.0	0.0	0.0	0.0	0.0	0.0	0.0	0.0	0.0	0.0	0.0	0.0	0.0	0.0	0.0	0.0	0.0	0.0	0.0
IMMP2L	83943	symbol	H. sapiens	83943	H. sapiens	0.0	0.0	0.0	0.0	0.0	0.0	0.0	0.0	0.0	0.0	0.0	0.0	0.0	1.0	0.0	0.0	0.0	0.0	1.0	0.0	0.0	0.0	0.0	0.0	0.0	0.0	0.0	0.0	0.0	0.0	0.0	0.0	0.0	0.0	0.0	0.0	0.0	0.0	0.0	0.0
MSL3P1	151507	symbol	H. sapiens	151507	H. sapiens	0.0	0.0	0.0	0.0	0.0	0.0	0.0	0.0	0.0	0.0	0.0	0.0	0.0	0.0	0.0	0.0	0.0	0.0	0.0	0.0	0.0	0.0	0.0	0.0	0.0	0.0	0.0	0.0	0.0	0.0	0.0	0.0	0.0	0.0	0.0	0.0	0.0	0.0	0.0	0.0
SLAIN2	57606	symbol	H. sapiens	57606	H. sapiens	0.0	1.0	0.0	0.0	0.0	0.0	0.0	0.0	0.0	0.0	0.0	0.0	0.0	0.0	0.0	0.0	0.0	0.0	0.0	0.0	0.0	1.0	0.0	0.0	0.0	0.0	0.0	0.0	0.0	0.0	0.0	1.0	0.0	0.0	0.0	0.0	0.0	0.0	0.0	0.0
MIR4435-2HG	541471	symbol	H. sapiens	541471	H. sapiens	0.0	0.0	0.0	0.0	0.0	0.0	0.0	0.0	0.0	0.0	0.0	0.0	0.0	0.0	0.0	0.0	0.0	0.0	0.0	0.0	0.0	0.0	0.0	0.0	0.0	0.0	0.0	0.0	0.0	0.0	0.0	0.0	0.0	0.0	0.0	0.0	0.0	0.0	0.0	0.0
FAM83D	81610	symbol	H. sapiens	81610	H. sapiens	1.0	0.0	1.0	0.0	1.0	0.0	0.0	0.0	0.0	0.0	0.0	0.0	0.0	0.0	1.0	0.0	0.0	0.0	1.0	0.0	0.0	0.0	0.0	0.0	0.0	0.0	0.0	0.0	0.0	0.0	0.0	0.0	0.0	0.0	1.0	0.0	0.0	0.0	0.0	0.0
TANC1	85461	symbol	H. sapiens	85461	H. sapiens	0.0	0.0	0.0	0.0	0.0	0.0	0.0	0.0	0.0	0.0	0.0	0.0	0.0	0.0	0.0	0.0	0.0	0.0	0.0	0.0	0.0	0.0	0.0	0.0	0.0	0.0	0.0	1.0	0.0	0.0	0.0	0.0	1.0	0.0	0.0	0.0	0.0	0.0	0.0	0.0
SLC1A2	6506	symbol	H. sapiens	6506	H. sapiens	0.0	0.0	0.0	0.0	0.0	0.0	0.0	0.0	0.0	0.0	0.0	0.0	0.0	0.0	0.0	1.0	0.0	0.0	0.0	0.0	0.0	0.0	0.0	0.0	0.0	0.0	0.0	1.0	0.0	0.0	0.0	0.0	0.0	0.0	0.0	0.0	0.0	0.0	0.0	0.0
TUBGCP3	10426	symbol	H. sapiens	10426	H. sapiens	0.0	1.0	0.0	0.0	0.0	0.0	0.0	1.0	0.0	1.0	0.0	0.0	0.0	0.0	0.0	0.0	0.0	0.0	0.0	0.0	0.0	1.0	0.0	0.0	0.0	0.0	0.0	0.0	0.0	0.0	0.0	1.0	0.0	0.0	0.0	0.0	0.0	0.0	0.0	0.0
GABBR1	2550	symbol	H. sapiens	2550	H. sapiens	0.0	0.0	0.0	0.0	0.0	0.0	0.0	0.0	0.0	0.0	0.0	0.0	0.0	0.0	0.0	0.0	0.0	0.0	0.0	0.0	0.0	0.0	0.0	0.0	0.0	0.0	0.0	0.0	0.0	0.0	0.0	0.0	0.0	0.0	0.0	0.0	0.0	0.0	0.0	0.0
AC106038.1						nan	nan	nan	nan	nan	nan	nan	nan	nan	nan	nan	nan	nan	nan	nan	nan	nan	nan	nan	nan	nan	nan	nan	nan	nan	nan	nan	nan	nan	nan	nan	nan	nan	nan	nan	nan	nan	nan	nan	nan
PMEPA1	56937	symbol	H. sapiens	56937	H. sapiens	0.0	0.0	0.0	1.0	0.0	0.0	0.0	0.0	0.0	0.0	0.0	0.0	0.0	0.0	0.0	0.0	0.0	0.0	0.0	0.0	0.0	1.0	1.0	0.0	0.0	1.0	0.0	0.0	0.0	0.0	0.0	0.0	0.0	0.0	0.0	0.0	0.0	0.0	0.0	0.0
RFC3	5983	symbol	H. sapiens	5983	H. sapiens	0.0	0.0	0.0	0.0	0.0	1.0	1.0	0.0	1.0	0.0	0.0	0.0	0.0	0.0	0.0	0.0	0.0	0.0	1.0	0.0	0.0	0.0	0.0	0.0	0.0	0.0	0.0	0.0	0.0	0.0	0.0	0.0	0.0	0.0	0.0	0.0	0.0	0.0	0.0	0.0
CAPN15	6650	symbol	H. sapiens	6650	H. sapiens	0.0	0.0	0.0	0.0	0.0	0.0	0.0	0.0	0.0	0.0	0.0	0.0	0.0	0.0	0.0	0.0	0.0	0.0	0.0	0.0	0.0	0.0	0.0	0.0	0.0	0.0	0.0	0.0	0.0	0.0	0.0	0.0	0.0	0.0	0.0	0.0	0.0	0.0	0.0	0.0
SLC7A1	6541	symbol	H. sapiens	6541	H. sapiens	0.0	0.0	0.0	0.0	0.0	0.0	0.0	0.0	0.0	0.0	0.0	0.0	0.0	0.0	0.0	0.0	0.0	0.0	0.0	0.0	0.0	0.0	0.0	0.0	0.0	0.0	0.0	0.0	0.0	0.0	0.0	0.0	0.0	0.0	0.0	0.0	0.0	0.0	0.0	0.0
RPS25	6230	symbol	H. sapiens	6230	H. sapiens	0.0	0.0	0.0	0.0	0.0	0.0	0.0	0.0	0.0	0.0	0.0	0.0	0.0	1.0	0.0	0.0	0.0	0.0	0.0	0.0	0.0	0.0	0.0	0.0	0.0	0.0	0.0	0.0	0.0	0.0	0.0	0.0	0.0	0.0	0.0	0.0	0.0	0.0	0.0	0.0
SNHG19	100507303	symbol	H. sapiens	100507303	H. sapiens	0.0	0.0	0.0	0.0	0.0	0.0	0.0	0.0	0.0	0.0	0.0	0.0	0.0	0.0	0.0	0.0	0.0	0.0	0.0	0.0	0.0	0.0	0.0	0.0	0.0	0.0	0.0	0.0	0.0	0.0	0.0	0.0	0.0	0.0	0.0	0.0	0.0	0.0	0.0	0.0
DIP2C	22982	symbol	H. sapiens	22982	H. sapiens	0.0	0.0	0.0	0.0	0.0	0.0	0.0	0.0	0.0	0.0	0.0	0.0	0.0	0.0	0.0	0.0	0.0	0.0	0.0	0.0	0.0	0.0	0.0	0.0	0.0	0.0	0.0	0.0	0.0	0.0	0.0	0.0	0.0	0.0	0.0	0.0	0.0	0.0	0.0	0.0
RPL7	6129	symbol	H. sapiens	6129	H. sapiens	0.0	0.0	0.0	0.0	0.0	0.0	0.0	0.0	0.0	0.0	0.0	0.0	0.0	1.0	0.0	0.0	0.0	0.0	0.0	0.0	0.0	0.0	0.0	0.0	0.0	0.0	0.0	0.0	0.0	0.0	0.0	0.0	0.0	0.0	0.0	0.0	0.0	0.0	0.0	0.0
SCD5	79966	symbol	H. sapiens	79966	H. sapiens	0.0	0.0	0.0	0.0	0.0	0.0	0.0	0.0	0.0	0.0	0.0	0.0	0.0	0.0	0.0	0.0	0.0	0.0	0.0	0.0	0.0	0.0	0.0	0.0	0.0	0.0	0.0	0.0	0.0	0.0	0.0	0.0	0.0	0.0	0.0	0.0	0.0	0.0	0.0	0.0
E2F7	144455	symbol	H. sapiens	144455	H. sapiens	1.0	0.0	1.0	1.0	0.0	1.0	0.0	0.0	0.0	1.0	1.0	0.0	0.0	0.0	1.0	0.0	1.0	1.0	1.0	1.0	0.0	0.0	0.0	0.0	0.0	0.0	0.0	0.0	0.0	0.0	0.0	0.0	0.0	0.0	0.0	0.0	0.0	0.0	0.0	0.0
ZNF681	148213	symbol	H. sapiens	148213	H. sapiens	0.0	0.0	0.0	0.0	0.0	0.0	0.0	0.0	0.0	0.0	0.0	0.0	0.0	0.0	0.0	0.0	0.0	0.0	0.0	0.0	0.0	0.0	0.0	0.0	0.0	0.0	0.0	0.0	0.0	0.0	0.0	0.0	0.0	0.0	0.0	0.0	0.0	0.0	0.0	0.0
RFC5	5985	symbol	H. sapiens	5985	H. sapiens	0.0	0.0	0.0	0.0	0.0	1.0	1.0	0.0	1.0	0.0	0.0	0.0	0.0	0.0	0.0	0.0	0.0	0.0	1.0	0.0	0.0	0.0	0.0	0.0	0.0	0.0	0.0	0.0	0.0	0.0	0.0	0.0	0.0	0.0	0.0	0.0	0.0	0.0	0.0	0.0
TASP1	55617	symbol	H. sapiens	55617	H. sapiens	0.0	0.0	0.0	0.0	0.0	0.0	0.0	0.0	0.0	0.0	0.0	0.0	0.0	0.0	0.0	0.0	0.0	0.0	0.0	0.0	0.0	0.0	0.0	0.0	0.0	0.0	0.0	0.0	0.0	0.0	0.0	0.0	0.0	0.0	0.0	0.0	0.0	0.0	0.0	0.0
IRX3	79191	symbol	H. sapiens	79191	H. sapiens	0.0	0.0	0.0	0.0	0.0	0.0	0.0	0.0	0.0	0.0	0.0	1.0	0.0	0.0	0.0	0.0	0.0	1.0	0.0	0.0	0.0	0.0	0.0	1.0	0.0	0.0	0.0	0.0	0.0	0.0	0.0	0.0	0.0	0.0	0.0	0.0	0.0	0.0	0.0	0.0
BOLA2-SMG1P6	107282092	symbol	H. sapiens	107282092	H. sapiens	0.0	0.0	0.0	0.0	0.0	0.0	0.0	0.0	0.0	0.0	0.0	0.0	0.0	0.0	0.0	0.0	0.0	0.0	0.0	0.0	0.0	0.0	0.0	0.0	0.0	0.0	0.0	0.0	0.0	0.0	0.0	0.0	0.0	0.0	0.0	0.0	0.0	0.0	0.0	0.0
SASH1	23328	symbol	H. sapiens	23328	H. sapiens	0.0	0.0	0.0	0.0	0.0	0.0	0.0	0.0	0.0	0.0	0.0	0.0	0.0	0.0	0.0	0.0	0.0	0.0	0.0	0.0	0.0	0.0	1.0	0.0	0.0	0.0	0.0	0.0	0.0	1.0	0.0	0.0	0.0	0.0	1.0	0.0	0.0	0.0	0.0	0.0
ATG4C	84938	symbol	H. sapiens	84938	H. sapiens	0.0	0.0	0.0	0.0	0.0	0.0	0.0	0.0	0.0	0.0	0.0	0.0	0.0	0.0	0.0	0.0	0.0	0.0	0.0	0.0	0.0	0.0	0.0	0.0	0.0	0.0	0.0	0.0	0.0	0.0	0.0	0.0	0.0	0.0	0.0	0.0	0.0	0.0	0.0	0.0
ECT2	1894	symbol	H. sapiens	1894	H. sapiens	1.0	1.0	1.0	1.0	0.0	0.0	0.0	0.0	0.0	1.0	0.0	1.0	1.0	1.0	1.0	0.0	0.0	0.0	0.0	0.0	0.0	0.0	0.0	0.0	0.0	0.0	0.0	1.0	0.0	0.0	1.0	1.0	0.0	0.0	0.0	1.0	0.0	0.0	0.0	0.0
NAA15	80155	symbol	H. sapiens	80155	H. sapiens	0.0	0.0	0.0	0.0	0.0	0.0	0.0	0.0	0.0	0.0	0.0	0.0	0.0	0.0	0.0	0.0	0.0	0.0	0.0	0.0	0.0	0.0	0.0	0.0	0.0	0.0	0.0	0.0	0.0	0.0	0.0	0.0	0.0	0.0	0.0	0.0	0.0	0.0	0.0	0.0
TCEANC2	127428	symbol	H. sapiens	127428	H. sapiens	0.0	0.0	0.0	0.0	0.0	0.0	0.0	0.0	0.0	0.0	0.0	0.0	0.0	0.0	0.0	0.0	0.0	0.0	0.0	0.0	0.0	0.0	0.0	0.0	0.0	0.0	0.0	0.0	0.0	0.0	0.0	0.0	0.0	0.0	0.0	0.0	0.0	0.0	0.0	0.0
FAM72A	729533	symbol	H. sapiens	729533	H. sapiens	0.0	0.0	0.0	0.0	0.0	0.0	0.0	0.0	0.0	0.0	0.0	0.0	0.0	0.0	0.0	0.0	0.0	0.0	0.0	0.0	0.0	0.0	0.0	0.0	0.0	0.0	0.0	0.0	0.0	0.0	0.0	0.0	0.0	0.0	0.0	0.0	0.0	0.0	0.0	0.0
CHML	1122	symbol	H. sapiens	1122	H. sapiens	0.0	0.0	0.0	0.0	0.0	0.0	0.0	0.0	0.0	0.0	0.0	0.0	0.0	0.0	0.0	0.0	0.0	0.0	0.0	0.0	0.0	0.0	0.0	0.0	0.0	0.0	0.0	0.0	0.0	0.0	1.0	0.0	0.0	0.0	0.0	0.0	0.0	0.0	0.0	0.0
POLR3G	10622	symbol	H. sapiens	10622	H. sapiens	0.0	0.0	0.0	0.0	0.0	0.0	0.0	0.0	0.0	0.0	0.0	0.0	0.0	0.0	0.0	0.0	0.0	0.0	0.0	0.0	0.0	0.0	0.0	0.0	0.0	0.0	0.0	0.0	0.0	0.0	0.0	0.0	0.0	0.0	0.0	0.0	1.0	0.0	0.0	0.0
OBSCN	84033	symbol	H. sapiens	84033	H. sapiens	0.0	0.0	0.0	0.0	0.0	0.0	0.0	0.0	0.0	0.0	0.0	0.0	0.0	0.0	0.0	0.0	0.0	0.0	0.0	0.0	0.0	0.0	0.0	0.0	0.0	0.0	0.0	0.0	0.0	0.0	1.0	1.0	1.0	0.0	0.0	0.0	0.0	0.0	0.0	0.0
MELK	9833	symbol	H. sapiens	9833	H. sapiens	0.0	0.0	1.0	0.0	0.0	0.0	0.0	0.0	0.0	0.0	0.0	0.0	0.0	0.0	0.0	0.0	0.0	0.0	0.0	0.0	0.0	0.0	0.0	0.0	1.0	0.0	0.0	0.0	0.0	0.0	0.0	0.0	0.0	0.0	0.0	0.0	0.0	0.0	0.0	0.0
MTBP	27085	symbol	H. sapiens	27085	H. sapiens	1.0	0.0	1.0	1.0	0.0	0.0	0.0	0.0	0.0	0.0	0.0	0.0	0.0	0.0	1.0	0.0	1.0	0.0	1.0	0.0	0.0	0.0	0.0	0.0	0.0	0.0	0.0	0.0	0.0	0.0	0.0	0.0	0.0	0.0	0.0	0.0	0.0	0.0	0.0	0.0
TDP1	55775	symbol	H. sapiens	55775	H. sapiens	0.0	0.0	0.0	0.0	0.0	1.0	0.0	0.0	1.0	0.0	0.0	0.0	0.0	0.0	0.0	0.0	0.0	0.0	0.0	0.0	0.0	0.0	0.0	0.0	0.0	0.0	0.0	0.0	0.0	0.0	0.0	0.0	0.0	0.0	0.0	0.0	0.0	0.0	0.0	0.0
RACGAP1	29127	symbol	H. sapiens	29127	H. sapiens	1.0	1.0	1.0	1.0	0.0	0.0	0.0	0.0	0.0	1.0	0.0	0.0	0.0	0.0	1.0	0.0	0.0	0.0	0.0	0.0	0.0	0.0	0.0	0.0	0.0	0.0	0.0	0.0	0.0	0.0	1.0	1.0	0.0	0.0	0.0	0.0	0.0	0.0	0.0	0.0
LRCH1	23143	symbol	H. sapiens	23143	H. sapiens	0.0	0.0	0.0	0.0	0.0	0.0	0.0	0.0	0.0	0.0	0.0	0.0	1.0	0.0	0.0	0.0	0.0	0.0	0.0	0.0	0.0	0.0	0.0	0.0	0.0	0.0	0.0	0.0	0.0	0.0	1.0	0.0	0.0	0.0	0.0	0.0	0.0	0.0	0.0	0.0
ZC2HC1A	51101	symbol	H. sapiens	51101	H. sapiens	0.0	0.0	0.0	0.0	0.0	0.0	0.0	0.0	0.0	0.0	0.0	0.0	0.0	0.0	0.0	0.0	0.0	0.0	0.0	0.0	0.0	0.0	0.0	0.0	0.0	0.0	0.0	0.0	0.0	0.0	0.0	0.0	0.0	0.0	0.0	0.0	0.0	0.0	0.0	0.0
TMTC2	160335	symbol	H. sapiens	160335	H. sapiens	0.0	0.0	0.0	0.0	0.0	0.0	0.0	0.0	0.0	0.0	0.0	0.0	0.0	0.0	0.0	0.0	0.0	0.0	0.0	0.0	0.0	0.0	0.0	0.0	0.0	0.0	0.0	0.0	0.0	0.0	0.0	0.0	0.0	0.0	0.0	0.0	0.0	0.0	0.0	0.0
MRPS25	64432	symbol	H. sapiens	64432	H. sapiens	0.0	0.0	0.0	0.0	0.0	0.0	0.0	0.0	0.0	0.0	0.0	0.0	0.0	1.0	0.0	0.0	0.0	0.0	0.0	0.0	0.0	0.0	0.0	0.0	0.0	0.0	0.0	0.0	0.0	0.0	0.0	0.0	0.0	0.0	0.0	0.0	0.0	0.0	0.0	1.0
RPL10A	4736	symbol	H. sapiens	4736	H. sapiens	0.0	0.0	0.0	0.0	0.0	0.0	0.0	0.0	0.0	0.0	0.0	0.0	0.0	1.0	0.0	0.0	0.0	0.0	0.0	0.0	0.0	0.0	0.0	0.0	0.0	0.0	0.0	0.0	0.0	0.0	0.0	0.0	0.0	0.0	0.0	0.0	0.0	0.0	0.0	0.0
SRPK1	6732	symbol	H. sapiens	6732	H. sapiens	1.0	0.0	0.0	0.0	0.0	0.0	1.0	0.0	0.0	0.0	0.0	0.0	0.0	0.0	0.0	0.0	0.0	0.0	0.0	0.0	0.0	0.0	0.0	0.0	0.0	0.0	0.0	0.0	0.0	0.0	0.0	0.0	0.0	0.0	0.0	0.0	0.0	0.0	0.0	0.0
CSE1L	1434	symbol	H. sapiens	1434	H. sapiens	0.0	0.0	0.0	0.0	0.0	0.0	0.0	0.0	0.0	0.0	0.0	0.0	0.0	1.0	0.0	0.0	0.0	0.0	0.0	0.0	0.0	0.0	0.0	0.0	0.0	0.0	0.0	0.0	0.0	0.0	0.0	0.0	0.0	0.0	0.0	0.0	0.0	0.0	0.0	0.0
CENPJ	55835	symbol	H. sapiens	55835	H. sapiens	1.0	1.0	1.0	0.0	1.0	0.0	0.0	0.0	0.0	0.0	0.0	1.0	0.0	0.0	1.0	0.0	0.0	0.0	0.0	0.0	0.0	1.0	0.0	0.0	0.0	0.0	0.0	0.0	1.0	0.0	0.0	1.0	0.0	0.0	0.0	0.0	0.0	0.0	0.0	0.0
SNRPE	6635	symbol	H. sapiens	6635	H. sapiens	0.0	0.0	0.0	0.0	0.0	0.0	0.0	0.0	0.0	0.0	0.0	0.0	0.0	0.0	0.0	0.0	0.0	0.0	0.0	0.0	0.0	0.0	0.0	0.0	0.0	0.0	0.0	0.0	0.0	0.0	0.0	0.0	0.0	0.0	0.0	0.0	0.0	0.0	0.0	0.0
IQCH	64799	symbol	H. sapiens	64799	H. sapiens	0.0	0.0	0.0	0.0	0.0	0.0	0.0	0.0	0.0	0.0	0.0	0.0	0.0	0.0	0.0	0.0	0.0	0.0	0.0	0.0	0.0	0.0	0.0	0.0	0.0	0.0	0.0	0.0	0.0	0.0	0.0	0.0	0.0	0.0	0.0	0.0	0.0	0.0	0.0	0.0
PODXL2	50512	symbol	H. sapiens	50512	H. sapiens	0.0	0.0	0.0	0.0	0.0	0.0	0.0	0.0	0.0	0.0	0.0	0.0	0.0	0.0	0.0	0.0	0.0	0.0	0.0	0.0	0.0	0.0	0.0	0.0	0.0	0.0	0.0	0.0	0.0	0.0	0.0	0.0	0.0	0.0	0.0	0.0	0.0	0.0	0.0	0.0
FSTL3	10272	symbol	H. sapiens	10272	H. sapiens	0.0	0.0	0.0	0.0	0.0	0.0	0.0	0.0	0.0	0.0	1.0	0.0	1.0	0.0	0.0	0.0	0.0	1.0	0.0	0.0	0.0	0.0	0.0	0.0	0.0	1.0	0.0	0.0	0.0	0.0	0.0	0.0	0.0	0.0	0.0	0.0	0.0	1.0	0.0	0.0
NHS	4810	symbol	H. sapiens	4810	H. sapiens	0.0	0.0	0.0	0.0	0.0	0.0	0.0	0.0	0.0	0.0	0.0	0.0	0.0	0.0	0.0	0.0	0.0	0.0	0.0	0.0	0.0	0.0	0.0	0.0	0.0	0.0	0.0	0.0	0.0	0.0	0.0	0.0	0.0	0.0	0.0	0.0	0.0	0.0	0.0	0.0
L2HGDH	79944	symbol	H. sapiens	79944	H. sapiens	0.0	0.0	0.0	0.0	0.0	0.0	0.0	0.0	0.0	0.0	0.0	0.0	0.0	0.0	0.0	0.0	0.0	0.0	0.0	0.0	0.0	0.0	0.0	0.0	0.0	0.0	0.0	0.0	0.0	0.0	0.0	0.0	0.0	1.0	0.0	0.0	0.0	0.0	0.0	0.0
MRPS27	23107	symbol	H. sapiens	23107	H. sapiens	0.0	0.0	0.0	0.0	0.0	0.0	0.0	0.0	0.0	0.0	0.0	0.0	0.0	1.0	0.0	0.0	0.0	0.0	0.0	0.0	0.0	0.0	0.0	0.0	0.0	0.0	0.0	0.0	0.0	0.0	0.0	0.0	0.0	0.0	0.0	0.0	0.0	0.0	0.0	1.0
PLEKHG4	25894	symbol	H. sapiens	25894	H. sapiens	0.0	0.0	0.0	0.0	0.0	0.0	0.0	0.0	0.0	0.0	0.0	0.0	0.0	0.0	0.0	0.0	0.0	0.0	0.0	0.0	0.0	0.0	0.0	0.0	0.0	0.0	0.0	0.0	0.0	0.0	1.0	0.0	0.0	0.0	0.0	0.0	0.0	0.0	0.0	0.0
INAVA	55765	symbol	H. sapiens	55765	H. sapiens	0.0	0.0	0.0	0.0	0.0	1.0	0.0	0.0	0.0	0.0	0.0	0.0	1.0	0.0	0.0	0.0	0.0	0.0	0.0	0.0	0.0	0.0	1.0	0.0	0.0	0.0	0.0	0.0	0.0	1.0	0.0	0.0	0.0	0.0	0.0	0.0	0.0	0.0	0.0	0.0
PTGFRN	5738	symbol	H. sapiens	5738	H. sapiens	0.0	0.0	0.0	0.0	0.0	0.0	0.0	0.0	0.0	0.0	1.0	0.0	0.0	0.0	0.0	1.0	0.0	0.0	0.0	0.0	0.0	0.0	0.0	0.0	0.0	0.0	0.0	0.0	0.0	0.0	0.0	0.0	1.0	0.0	0.0	0.0	0.0	0.0	0.0	0.0
KIF2C	11004	symbol	H. sapiens	11004	H. sapiens	1.0	1.0	0.0	1.0	1.0	0.0	0.0	0.0	0.0	1.0	0.0	0.0	0.0	0.0	0.0	0.0	0.0	0.0	0.0	0.0	0.0	1.0	0.0	0.0	0.0	0.0	0.0	0.0	0.0	0.0	0.0	1.0	0.0	0.0	0.0	0.0	0.0	0.0	0.0	1.0
SBK1	388228	symbol	H. sapiens	388228	H. sapiens	0.0	0.0	0.0	0.0	0.0	0.0	0.0	0.0	0.0	0.0	0.0	0.0	0.0	0.0	0.0	0.0	0.0	0.0	0.0	0.0	0.0	0.0	0.0	0.0	0.0	0.0	0.0	0.0	0.0	0.0	0.0	0.0	0.0	0.0	0.0	0.0	0.0	0.0	1.0	0.0
RIMS4	140730	symbol	H. sapiens	140730	H. sapiens	0.0	0.0	0.0	0.0	1.0	0.0	0.0	0.0	0.0	0.0	0.0	0.0	0.0	0.0	0.0	0.0	0.0	0.0	0.0	0.0	0.0	0.0	0.0	0.0	0.0	0.0	0.0	0.0	0.0	0.0	0.0	0.0	0.0	0.0	0.0	0.0	0.0	0.0	0.0	0.0
MYLK	4638	symbol	H. sapiens	4638	H. sapiens	0.0	0.0	0.0	0.0	0.0	0.0	0.0	0.0	0.0	0.0	0.0	0.0	0.0	0.0	0.0	0.0	0.0	1.0	0.0	0.0	0.0	0.0	0.0	0.0	0.0	0.0	0.0	1.0	1.0	0.0	0.0	0.0	1.0	0.0	0.0	0.0	0.0	0.0	0.0	0.0
JAG2	3714	symbol	H. sapiens	3714	H. sapiens	0.0	0.0	0.0	0.0	0.0	0.0	0.0	0.0	0.0	0.0	0.0	0.0	1.0	0.0	0.0	0.0	0.0	1.0	0.0	1.0	0.0	0.0	0.0	1.0	0.0	0.0	0.0	0.0	0.0	0.0	0.0	0.0	0.0	0.0	0.0	0.0	0.0	0.0	0.0	0.0
ZNF2	7549	symbol	H. sapiens	7549	H. sapiens	0.0	0.0	0.0	0.0	0.0	0.0	0.0	0.0	0.0	0.0	0.0	0.0	0.0	0.0	0.0	0.0	0.0	0.0	0.0	0.0	0.0	0.0	0.0	0.0	0.0	0.0	0.0	0.0	0.0	0.0	0.0	0.0	0.0	0.0	0.0	0.0	0.0	0.0	0.0	0.0
PCLAF	9768	symbol	H. sapiens	9768	H. sapiens	0.0	1.0	0.0	0.0	0.0	1.0	0.0	0.0	1.0	0.0	0.0	0.0	0.0	0.0	0.0	0.0	0.0	0.0	0.0	0.0	0.0	0.0	0.0	0.0	0.0	0.0	0.0	1.0	1.0	0.0	0.0	0.0	0.0	0.0	0.0	0.0	0.0	0.0	0.0	0.0
SMC2	10592	symbol	H. sapiens	10592	H. sapiens	1.0	0.0	0.0	0.0	0.0	0.0	1.0	1.0	0.0	0.0	0.0	0.0	0.0	0.0	0.0	0.0	0.0	0.0	0.0	0.0	1.0	0.0	0.0	0.0	0.0	0.0	0.0	0.0	0.0	0.0	0.0	0.0	0.0	0.0	0.0	0.0	0.0	0.0	0.0	0.0
JPH1	56704	symbol	H. sapiens	56704	H. sapiens	0.0	0.0	0.0	0.0	0.0	0.0	0.0	0.0	0.0	0.0	0.0	0.0	0.0	0.0	0.0	0.0	0.0	0.0	0.0	0.0	0.0	0.0	0.0	0.0	0.0	0.0	0.0	0.0	0.0	0.0	0.0	0.0	1.0	0.0	0.0	0.0	0.0	0.0	0.0	0.0
RPS24	6229	symbol	H. sapiens	6229	H. sapiens	0.0	0.0	0.0	0.0	0.0	0.0	0.0	0.0	0.0	0.0	0.0	0.0	0.0	1.0	0.0	0.0	0.0	0.0	0.0	0.0	0.0	0.0	0.0	0.0	0.0	0.0	0.0	0.0	0.0	0.0	0.0	0.0	0.0	0.0	0.0	0.0	0.0	1.0	0.0	0.0
TTC7A	57217	symbol	H. sapiens	57217	H. sapiens	0.0	0.0	0.0	0.0	0.0	0.0	0.0	0.0	0.0	0.0	0.0	0.0	0.0	1.0	0.0	0.0	0.0	0.0	0.0	0.0	0.0	0.0	0.0	0.0	0.0	0.0	0.0	0.0	0.0	0.0	0.0	0.0	0.0	0.0	0.0	0.0	0.0	0.0	0.0	0.0
TIAM1	7074	symbol	H. sapiens	7074	H. sapiens	0.0	0.0	0.0	0.0	0.0	0.0	0.0	0.0	0.0	0.0	0.0	1.0	1.0	1.0	0.0	1.0	0.0	1.0	0.0	0.0	0.0	0.0	0.0	0.0	0.0	0.0	0.0	0.0	0.0	1.0	1.0	0.0	0.0	0.0	0.0	0.0	1.0	0.0	0.0	0.0
EP300	2033	symbol	H. sapiens	2033	H. sapiens	0.0	0.0	1.0	1.0	0.0	1.0	0.0	0.0	1.0	0.0	0.0	1.0	0.0	1.0	1.0	1.0	1.0	0.0	1.0	1.0	0.0	1.0	1.0	1.0	1.0	1.0	0.0	1.0	0.0	1.0	0.0	0.0	1.0	0.0	0.0	0.0	1.0	1.0	1.0	0.0
UNG	7374	symbol	H. sapiens	7374	H. sapiens	0.0	0.0	0.0	0.0	0.0	0.0	0.0	0.0	1.0	0.0	0.0	0.0	0.0	1.0	0.0	0.0	0.0	0.0	0.0	0.0	0.0	0.0	0.0	0.0	0.0	0.0	0.0	0.0	0.0	0.0	0.0	0.0	0.0	0.0	0.0	0.0	1.0	0.0	0.0	0.0
MCM7	4176	symbol	H. sapiens	4176	H. sapiens	0.0	0.0	1.0	0.0	0.0	1.0	1.0	0.0	1.0	0.0	0.0	0.0	0.0	0.0	0.0	0.0	0.0	0.0	1.0	0.0	1.0	0.0	0.0	0.0	0.0	1.0	0.0	0.0	0.0	0.0	0.0	0.0	0.0	0.0	0.0	0.0	0.0	0.0	0.0	0.0
FAM117B	150864	symbol	H. sapiens	150864	H. sapiens	0.0	0.0	0.0	0.0	0.0	0.0	0.0	0.0	0.0	0.0	0.0	0.0	0.0	0.0	0.0	0.0	0.0	0.0	0.0	0.0	0.0	0.0	0.0	0.0	0.0	0.0	0.0	0.0	0.0	0.0	0.0	0.0	0.0	0.0	0.0	0.0	0.0	0.0	0.0	0.0
CARNMT1	138199	symbol	H. sapiens	138199	H. sapiens	0.0	0.0	0.0	0.0	0.0	0.0	0.0	0.0	0.0	0.0	0.0	0.0	0.0	1.0	0.0	0.0	0.0	0.0	0.0	0.0	0.0	0.0	0.0	0.0	0.0	0.0	0.0	0.0	0.0	0.0	0.0	0.0	0.0	1.0	0.0	0.0	0.0	0.0	0.0	0.0
EIF3L	51386	symbol	H. sapiens	51386	H. sapiens	0.0	0.0	0.0	0.0	0.0	0.0	0.0	0.0	0.0	0.0	0.0	0.0	0.0	1.0	0.0	0.0	0.0	0.0	0.0	0.0	0.0	0.0	0.0	0.0	0.0	0.0	0.0	0.0	0.0	0.0	0.0	0.0	0.0	0.0	0.0	0.0	0.0	0.0	0.0	0.0
FAM210B	116151	symbol	H. sapiens	116151	H. sapiens	0.0	0.0	0.0	0.0	0.0	0.0	0.0	0.0	0.0	0.0	0.0	0.0	0.0	0.0	0.0	0.0	0.0	0.0	1.0	0.0	0.0	0.0	1.0	0.0	0.0	0.0	0.0	0.0	0.0	0.0	0.0	0.0	0.0	0.0	0.0	0.0	0.0	1.0	0.0	0.0
ST6GALNAC6	30815	symbol	H. sapiens	30815	H. sapiens	0.0	0.0	0.0	0.0	0.0	0.0	0.0	0.0	0.0	0.0	0.0	0.0	0.0	0.0	0.0	0.0	0.0	0.0	0.0	0.0	0.0	0.0	0.0	0.0	0.0	0.0	0.0	0.0	0.0	0.0	0.0	0.0	0.0	0.0	0.0	0.0	0.0	0.0	0.0	0.0
ARL6IP1	23204	symbol	H. sapiens	23204	H. sapiens	0.0	0.0	0.0	0.0	0.0	0.0	0.0	0.0	0.0	0.0	0.0	0.0	0.0	1.0	0.0	0.0	0.0	0.0	0.0	0.0	0.0	0.0	0.0	0.0	0.0	0.0	0.0	0.0	0.0	0.0	0.0	0.0	0.0	0.0	0.0	0.0	0.0	0.0	0.0	0.0
NEK2	4751	symbol	H. sapiens	4751	H. sapiens	1.0	1.0	1.0	1.0	1.0	1.0	0.0	1.0	0.0	1.0	0.0	0.0	0.0	0.0	0.0	0.0	1.0	0.0	0.0	1.0	0.0	0.0	0.0	0.0	0.0	0.0	0.0	0.0	1.0	0.0	0.0	0.0	0.0	0.0	0.0	0.0	0.0	0.0	0.0	0.0
CHDH	55349	symbol	H. sapiens	55349	H. sapiens	0.0	0.0	0.0	0.0	0.0	0.0	0.0	0.0	0.0	0.0	0.0	0.0	0.0	0.0	0.0	0.0	0.0	0.0	0.0	0.0	0.0	0.0	0.0	0.0	0.0	0.0	0.0	0.0	0.0	0.0	0.0	0.0	0.0	1.0	0.0	0.0	0.0	0.0	0.0	0.0
MAPT	4137	symbol	H. sapiens	4137	H. sapiens	1.0	1.0	0.0	1.0	1.0	0.0	0.0	0.0	0.0	0.0	0.0	1.0	0.0	1.0	0.0	1.0	0.0	0.0	0.0	0.0	0.0	1.0	0.0	0.0	0.0	1.0	0.0	0.0	0.0	1.0	1.0	1.0	0.0	0.0	0.0	0.0	0.0	0.0	0.0	0.0
RPSAP12	387867	symbol	H. sapiens	387867	H. sapiens	0.0	0.0	0.0	0.0	0.0	0.0	0.0	0.0	0.0	0.0	0.0	0.0	0.0	0.0	0.0	0.0	0.0	0.0	0.0	0.0	0.0	0.0	0.0	0.0	0.0	0.0	0.0	0.0	0.0	0.0	0.0	0.0	0.0	0.0	0.0	0.0	0.0	0.0	0.0	0.0
SYCP2	10388	symbol	H. sapiens	10388	H. sapiens	1.0	0.0	0.0	0.0	0.0	0.0	0.0	1.0	0.0	0.0	0.0	0.0	0.0	0.0	0.0	0.0	0.0	0.0	1.0	0.0	0.0	0.0	0.0	0.0	0.0	0.0	0.0	0.0	0.0	0.0	0.0	0.0	0.0	0.0	0.0	0.0	0.0	0.0	0.0	0.0
PTPRG	5793	symbol	H. sapiens	5793	H. sapiens	0.0	0.0	0.0	1.0	0.0	0.0	0.0	0.0	0.0	0.0	0.0	1.0	1.0	0.0	0.0	0.0	0.0	0.0	0.0	0.0	0.0	0.0	0.0	0.0	0.0	0.0	0.0	0.0	0.0	0.0	0.0	0.0	0.0	0.0	0.0	0.0	0.0	0.0	0.0	0.0
BCL9	607	symbol	H. sapiens	607	H. sapiens	0.0	0.0	0.0	0.0	0.0	0.0	0.0	0.0	0.0	0.0	1.0	0.0	0.0	0.0	0.0	1.0	0.0	0.0	0.0	0.0	0.0	0.0	0.0	0.0	0.0	1.0	0.0	0.0	0.0	0.0	0.0	0.0	1.0	0.0	0.0	0.0	0.0	0.0	0.0	0.0
MET	4233	symbol	H. sapiens	4233	H. sapiens	0.0	1.0	0.0	1.0	0.0	0.0	0.0	0.0	0.0	0.0	1.0	1.0	0.0	0.0	0.0	0.0	0.0	1.0	0.0	1.0	0.0	1.0	0.0	0.0	0.0	0.0	0.0	0.0	0.0	1.0	1.0	1.0	0.0	0.0	0.0	0.0	1.0	0.0	0.0	0.0
ZNF37A	7587	symbol	H. sapiens	7587	H. sapiens	0.0	0.0	0.0	0.0	0.0	0.0	0.0	0.0	0.0	0.0	0.0	0.0	0.0	0.0	0.0	0.0	0.0	0.0	0.0	0.0	0.0	0.0	0.0	0.0	0.0	0.0	0.0	0.0	0.0	0.0	0.0	0.0	0.0	0.0	0.0	0.0	0.0	0.0	0.0	0.0
RPL9	6133	symbol	H. sapiens	6133	H. sapiens	0.0	0.0	0.0	0.0	0.0	0.0	0.0	0.0	0.0	0.0	0.0	0.0	0.0	1.0	0.0	0.0	0.0	0.0	0.0	0.0	0.0	0.0	0.0	0.0	0.0	0.0	0.0	0.0	0.0	0.0	0.0	0.0	0.0	0.0	0.0	0.0	0.0	0.0	0.0	0.0
AC133644.2						nan	nan	nan	nan	nan	nan	nan	nan	nan	nan	nan	nan	nan	nan	nan	nan	nan	nan	nan	nan	nan	nan	nan	nan	nan	nan	nan	nan	nan	nan	nan	nan	nan	nan	nan	nan	nan	nan	nan	nan
ATP2A2	488	symbol	H. sapiens	488	H. sapiens	0.0	0.0	0.0	0.0	1.0	0.0	0.0	0.0	0.0	0.0	0.0	0.0	0.0	0.0	0.0	1.0	0.0	0.0	0.0	0.0	0.0	0.0	0.0	0.0	0.0	0.0	0.0	0.0	0.0	0.0	0.0	1.0	1.0	0.0	0.0	0.0	0.0	0.0	0.0	0.0
C4orf46	201725	symbol	H. sapiens	201725	H. sapiens	0.0	0.0	0.0	0.0	0.0	0.0	0.0	0.0	0.0	0.0	0.0	0.0	0.0	0.0	0.0	0.0	0.0	0.0	0.0	0.0	0.0	0.0	0.0	0.0	0.0	0.0	0.0	0.0	0.0	0.0	0.0	0.0	0.0	0.0	0.0	0.0	0.0	0.0	0.0	0.0
FAM98B	283742	symbol	H. sapiens	283742	H. sapiens	0.0	0.0	0.0	0.0	0.0	0.0	0.0	0.0	0.0	0.0	0.0	0.0	0.0	0.0	0.0	0.0	0.0	0.0	0.0	0.0	0.0	0.0	0.0	0.0	0.0	0.0	0.0	0.0	0.0	0.0	0.0	0.0	0.0	0.0	0.0	0.0	0.0	0.0	0.0	0.0
SLC39A10	57181	symbol	H. sapiens	57181	H. sapiens	0.0	0.0	0.0	0.0	0.0	0.0	0.0	0.0	0.0	0.0	0.0	0.0	0.0	0.0	0.0	0.0	0.0	0.0	0.0	0.0	0.0	0.0	0.0	0.0	0.0	0.0	0.0	0.0	0.0	0.0	1.0	0.0	0.0	0.0	0.0	0.0	0.0	0.0	0.0	0.0
MCM4	4173	symbol	H. sapiens	4173	H. sapiens	0.0	0.0	1.0	0.0	0.0	1.0	1.0	0.0	1.0	0.0	0.0	0.0	0.0	0.0	0.0	0.0	0.0	0.0	1.0	0.0	1.0	0.0	0.0	0.0	0.0	0.0	0.0	0.0	0.0	0.0	0.0	0.0	0.0	0.0	0.0	0.0	0.0	0.0	0.0	0.0
RAPGEFL1	51195	symbol	H. sapiens	51195	H. sapiens	0.0	0.0	0.0	0.0	0.0	0.0	0.0	0.0	0.0	0.0	0.0	0.0	0.0	0.0	0.0	0.0	0.0	0.0	0.0	0.0	0.0	0.0	0.0	0.0	0.0	0.0	0.0	0.0	0.0	0.0	1.0	0.0	0.0	0.0	0.0	0.0	0.0	0.0	0.0	0.0
DFFA	1676	symbol	H. sapiens	1676	H. sapiens	0.0	0.0	0.0	1.0	0.0	1.0	0.0	0.0	0.0	0.0	0.0	0.0	0.0	1.0	0.0	0.0	0.0	0.0	0.0	0.0	0.0	0.0	0.0	0.0	0.0	0.0	0.0	0.0	0.0	0.0	0.0	0.0	0.0	0.0	0.0	0.0	1.0	0.0	0.0	1.0
PTMA	5757	symbol	H. sapiens	5757	H. sapiens	0.0	0.0	0.0	0.0	0.0	0.0	0.0	0.0	0.0	0.0	0.0	0.0	0.0	0.0	0.0	0.0	0.0	0.0	0.0	0.0	1.0	0.0	0.0	0.0	0.0	0.0	0.0	0.0	0.0	0.0	0.0	0.0	0.0	0.0	0.0	0.0	0.0	0.0	0.0	0.0
DSCC1	79075	symbol	H. sapiens	79075	H. sapiens	1.0	0.0	0.0	0.0	0.0	1.0	1.0	0.0	1.0	0.0	0.0	0.0	0.0	0.0	0.0	0.0	0.0	0.0	0.0	0.0	0.0	0.0	0.0	0.0	0.0	0.0	0.0	0.0	0.0	0.0	0.0	0.0	0.0	0.0	0.0	0.0	0.0	0.0	0.0	0.0
HMGB1	3146	symbol	H. sapiens	3146	H. sapiens	0.0	0.0	0.0	1.0	0.0	1.0	1.0	0.0	1.0	0.0	0.0	1.0	1.0	1.0	0.0	0.0	0.0	0.0	0.0	0.0	1.0	1.0	1.0	0.0	0.0	0.0	0.0	0.0	0.0	1.0	1.0	0.0	0.0	0.0	1.0	0.0	1.0	1.0	0.0	1.0
IPMK	253430	symbol	H. sapiens	253430	H. sapiens	0.0	0.0	0.0	0.0	0.0	0.0	0.0	0.0	0.0	0.0	0.0	0.0	0.0	0.0	0.0	0.0	0.0	0.0	0.0	0.0	0.0	0.0	0.0	0.0	0.0	0.0	0.0	0.0	0.0	0.0	0.0	0.0	0.0	0.0	0.0	0.0	0.0	0.0	0.0	0.0
NUP155	9631	symbol	H. sapiens	9631	H. sapiens	0.0	0.0	0.0	0.0	0.0	0.0	0.0	0.0	0.0	0.0	0.0	0.0	0.0	1.0	0.0	0.0	0.0	0.0	0.0	0.0	0.0	0.0	0.0	0.0	0.0	0.0	0.0	0.0	0.0	1.0	0.0	1.0	0.0	0.0	0.0	0.0	0.0	0.0	0.0	0.0
CDKN3	1033	symbol	H. sapiens	1033	H. sapiens	0.0	0.0	1.0	0.0	0.0	0.0	0.0	0.0	0.0	0.0	0.0	0.0	0.0	0.0	0.0	0.0	1.0	0.0	1.0	0.0	0.0	0.0	0.0	0.0	0.0	0.0	0.0	0.0	0.0	0.0	0.0	0.0	0.0	0.0	0.0	0.0	0.0	0.0	0.0	0.0
CERS1	10715	symbol	H. sapiens	10715	H. sapiens	0.0	0.0	0.0	0.0	0.0	1.0	0.0	0.0	0.0	0.0	0.0	0.0	0.0	0.0	0.0	0.0	0.0	0.0	0.0	0.0	0.0	0.0	0.0	0.0	0.0	0.0	0.0	1.0	0.0	0.0	0.0	0.0	0.0	0.0	0.0	0.0	0.0	0.0	0.0	0.0
SYBU	55638	symbol	H. sapiens	55638	H. sapiens	0.0	1.0	0.0	0.0	1.0	0.0	0.0	0.0	0.0	0.0	0.0	0.0	0.0	0.0	0.0	0.0	0.0	0.0	1.0	0.0	0.0	0.0	0.0	0.0	0.0	0.0	0.0	0.0	0.0	0.0	0.0	0.0	0.0	0.0	0.0	0.0	0.0	0.0	0.0	0.0
ZNF343	79175	symbol	H. sapiens	79175	H. sapiens	0.0	0.0	0.0	0.0	0.0	0.0	0.0	0.0	0.0	0.0	0.0	0.0	0.0	0.0	0.0	0.0	0.0	0.0	0.0	0.0	0.0	0.0	0.0	0.0	0.0	0.0	0.0	0.0	0.0	0.0	0.0	0.0	0.0	0.0	0.0	0.0	0.0	0.0	0.0	0.0
COBLL1	22837	symbol	H. sapiens	22837	H. sapiens	0.0	0.0	0.0	0.0	0.0	0.0	0.0	0.0	0.0	0.0	0.0	0.0	0.0	0.0	0.0	0.0	0.0	0.0	0.0	0.0	0.0	0.0	0.0	0.0	0.0	0.0	0.0	0.0	0.0	0.0	0.0	0.0	0.0	0.0	0.0	0.0	0.0	0.0	0.0	0.0
SETBP1	26040	symbol	H. sapiens	26040	H. sapiens	0.0	0.0	0.0	0.0	0.0	0.0	0.0	0.0	0.0	0.0	0.0	0.0	0.0	0.0	0.0	0.0	0.0	0.0	0.0	0.0	0.0	0.0	0.0	0.0	0.0	0.0	0.0	0.0	0.0	0.0	0.0	0.0	0.0	0.0	0.0	0.0	0.0	0.0	0.0	0.0
GPSM2	29899	symbol	H. sapiens	29899	H. sapiens	1.0	1.0	1.0	0.0	1.0	0.0	0.0	0.0	0.0	1.0	0.0	0.0	0.0	0.0	1.0	0.0	0.0	0.0	0.0	0.0	0.0	0.0	0.0	0.0	0.0	0.0	1.0	0.0	0.0	0.0	1.0	0.0	0.0	0.0	0.0	0.0	0.0	0.0	0.0	0.0
KRT13	3860	symbol	H. sapiens	3860	H. sapiens	0.0	0.0	0.0	0.0	0.0	0.0	0.0	0.0	0.0	0.0	0.0	0.0	0.0	0.0	0.0	0.0	0.0	0.0	0.0	1.0	0.0	0.0	0.0	0.0	0.0	0.0	0.0	0.0	0.0	0.0	0.0	0.0	0.0	0.0	0.0	0.0	0.0	0.0	0.0	0.0
MND1	84057	symbol	H. sapiens	84057	H. sapiens	1.0	0.0	0.0	0.0	0.0	0.0	0.0	1.0	1.0	0.0	0.0	0.0	0.0	0.0	0.0	0.0	0.0	0.0	0.0	0.0	0.0	0.0	0.0	0.0	0.0	0.0	0.0	0.0	0.0	0.0	0.0	0.0	0.0	0.0	0.0	0.0	0.0	0.0	0.0	0.0
RAD51B	5890	symbol	H. sapiens	5890	H. sapiens	1.0	0.0	1.0	0.0	0.0	0.0	0.0	1.0	1.0	0.0	0.0	0.0	0.0	0.0	1.0	0.0	0.0	0.0	0.0	0.0	0.0	0.0	0.0	0.0	0.0	0.0	0.0	0.0	0.0	0.0	0.0	0.0	0.0	0.0	0.0	0.0	0.0	0.0	0.0	0.0
ACBD3	64746	symbol	H. sapiens	64746	H. sapiens	0.0	0.0	0.0	0.0	0.0	0.0	0.0	0.0	0.0	0.0	0.0	0.0	0.0	0.0	0.0	0.0	0.0	0.0	0.0	0.0	0.0	0.0	0.0	0.0	0.0	0.0	0.0	0.0	0.0	0.0	0.0	0.0	0.0	0.0	0.0	0.0	0.0	0.0	0.0	0.0
LRRN2	10446	symbol	H. sapiens	10446	H. sapiens	0.0	0.0	0.0	0.0	0.0	0.0	0.0	0.0	0.0	0.0	0.0	0.0	0.0	0.0	0.0	0.0	0.0	0.0	0.0	0.0	0.0	0.0	0.0	0.0	0.0	0.0	0.0	0.0	0.0	0.0	0.0	0.0	0.0	0.0	0.0	0.0	0.0	0.0	0.0	0.0
DHX33	56919	symbol	H. sapiens	56919	H. sapiens	0.0	1.0	0.0	0.0	0.0	0.0	0.0	0.0	0.0	0.0	0.0	0.0	0.0	1.0	0.0	0.0	0.0	0.0	0.0	0.0	0.0	1.0	0.0	0.0	0.0	0.0	0.0	0.0	0.0	0.0	0.0	0.0	0.0	0.0	0.0	0.0	1.0	0.0	0.0	0.0
ALG8	79053	symbol	H. sapiens	79053	H. sapiens	0.0	0.0	0.0	0.0	0.0	0.0	0.0	0.0	0.0	0.0	0.0	0.0	0.0	0.0	0.0	0.0	0.0	0.0	0.0	0.0	0.0	0.0	0.0	0.0	0.0	0.0	0.0	0.0	0.0	0.0	0.0	0.0	0.0	0.0	0.0	0.0	0.0	0.0	0.0	0.0
UBE3A	7337	symbol	H. sapiens	7337	H. sapiens	0.0	0.0	0.0	1.0	0.0	0.0	0.0	0.0	0.0	0.0	1.0	1.0	0.0	0.0	0.0	1.0	0.0	1.0	0.0	0.0	0.0	0.0	1.0	0.0	0.0	1.0	0.0	0.0	0.0	0.0	0.0	0.0	0.0	0.0	1.0	0.0	0.0	0.0	0.0	0.0
STOX2	56977	symbol	H. sapiens	56977	H. sapiens	0.0	0.0	0.0	0.0	0.0	0.0	0.0	0.0	0.0	0.0	0.0	0.0	0.0	0.0	0.0	0.0	0.0	0.0	0.0	1.0	0.0	0.0	0.0	0.0	0.0	0.0	0.0	0.0	0.0	0.0	0.0	0.0	0.0	0.0	0.0	0.0	0.0	0.0	0.0	0.0
DGKH	160851	symbol	H. sapiens	160851	H. sapiens	0.0	0.0	0.0	0.0	0.0	0.0	0.0	0.0	0.0	0.0	0.0	0.0	0.0	0.0	0.0	0.0	0.0	0.0	0.0	0.0	0.0	0.0	0.0	0.0	0.0	0.0	0.0	0.0	0.0	0.0	0.0	0.0	0.0	0.0	0.0	0.0	0.0	0.0	0.0	0.0
NOTCH1	4851	symbol	H. sapiens	4851	H. sapiens	1.0	0.0	0.0	1.0	0.0	1.0	0.0	0.0	0.0	0.0	1.0	1.0	1.0	0.0	0.0	1.0	1.0	1.0	0.0	1.0	0.0	0.0	1.0	1.0	0.0	1.0	0.0	0.0	1.0	0.0	1.0	0.0	1.0	0.0	0.0	0.0	1.0	1.0	0.0	0.0

## Sheet: Enrichment_downregulated_genes
GroupID	Category	Term	Description	LogP	Log(q-value)	InTerm_InList	Genes	Symbols
1_Summary	GO Biological Processes	GO:0000280	nuclear division	-18.2651	-14.0645	40/411	655,858,891,1062,1063,4085,4288,4603,4751,5890,6790,7153,9055,9319,9493,9787,9820,9928,10051,10274,10388,10592,10783,11004,23236,25788,27085,29127,51203,54443,55165,55706,57520,63979,64151,79075,84057,91782,259266,348654,4137,1894,6732,57082,64210,81610,150465,641,890,4609,4851,5727,10112,23331,29899,54892,55521,55835,91768,144455,346389	BMP7,CAV2,CCNB1,CENPE,CENPF,MAD2L1,MKI67,MYBL1,NEK2,RAD51B,AURKA,TOP2A,PRC1,TRIP13,KIF23,DLGAP5,CUL7,KIF14,SMC4,STAG1,SYCP2,SMC2,NEK6,KIF2C,PLCB1,RAD54B,MTBP,RACGAP1,NUSAP1,ANLN,CEP55,NDC1,HECW2,FIGNL1,NCAPG,DSCC1,MND1,CHMP7,ASPM,GEN1,MAPT,ECT2,SRPK1,KNL1,MMS19,FAM83D,TTL,BLM,CCNA2,MYC,NOTCH1,PTCH1,KIF20A,TTC28,GPSM2,NCAPG2,TRIM36,CENPJ,CABLES1,E2F7,MACC1
1_Member	GO Biological Processes	GO:0000280	nuclear division	-18.2651	-14.0645	40/411	655,858,891,1062,1063,4085,4288,4603,4751,5890,6790,7153,9055,9319,9493,9787,9820,9928,10051,10274,10388,10592,10783,11004,23236,25788,27085,29127,51203,54443,55165,55706,57520,63979,64151,79075,84057,91782,259266,348654	BMP7,CAV2,CCNB1,CENPE,CENPF,MAD2L1,MKI67,MYBL1,NEK2,RAD51B,AURKA,TOP2A,PRC1,TRIP13,KIF23,DLGAP5,CUL7,KIF14,SMC4,STAG1,SYCP2,SMC2,NEK6,KIF2C,PLCB1,RAD54B,MTBP,RACGAP1,NUSAP1,ANLN,CEP55,NDC1,HECW2,FIGNL1,NCAPG,DSCC1,MND1,CHMP7,ASPM,GEN1
1_Member	GO Biological Processes	GO:0048285	organelle fission	-17.5703	-13.6707	41/453	655,858,891,1062,1063,4085,4137,4288,4603,4751,5890,6790,7153,9055,9319,9493,9787,9820,9928,10051,10274,10388,10592,10783,11004,23236,25788,27085,29127,51203,54443,55165,55706,57520,63979,64151,79075,84057,91782,259266,348654	BMP7,CAV2,CCNB1,CENPE,CENPF,MAD2L1,MAPT,MKI67,MYBL1,NEK2,RAD51B,AURKA,TOP2A,PRC1,TRIP13,KIF23,DLGAP5,CUL7,KIF14,SMC4,STAG1,SYCP2,SMC2,NEK6,KIF2C,PLCB1,RAD54B,MTBP,RACGAP1,NUSAP1,ANLN,CEP55,NDC1,HECW2,FIGNL1,NCAPG,DSCC1,MND1,CHMP7,ASPM,GEN1
1_Member	GO Biological Processes	GO:0007059	chromosome segregation	-15.7138	-11.9903	33/324	891,1062,1063,1894,4085,4288,4751,6732,7153,9055,9319,9493,9787,9928,10051,10274,10388,10592,10783,11004,29127,51203,55165,55706,57082,57520,64151,64210,79075,81610,91782,150465,348654	CCNB1,CENPE,CENPF,ECT2,MAD2L1,MKI67,NEK2,SRPK1,TOP2A,PRC1,TRIP13,KIF23,DLGAP5,KIF14,SMC4,STAG1,SYCP2,SMC2,NEK6,KIF2C,RACGAP1,NUSAP1,CEP55,NDC1,KNL1,HECW2,NCAPG,MMS19,DSCC1,FAM83D,CHMP7,TTL,GEN1
1_Member	GO Biological Processes	GO:0098813	nuclear chromosome segregation	-15.5815	-11.9829	30/265	891,1062,1063,1894,4085,4751,7153,9055,9319,9493,9787,9928,10051,10274,10388,10592,10783,11004,29127,51203,55165,55706,57082,57520,64151,79075,81610,91782,150465,348654	CCNB1,CENPE,CENPF,ECT2,MAD2L1,NEK2,TOP2A,PRC1,TRIP13,KIF23,DLGAP5,KIF14,SMC4,STAG1,SYCP2,SMC2,NEK6,KIF2C,RACGAP1,NUSAP1,CEP55,NDC1,KNL1,HECW2,NCAPG,DSCC1,FAM83D,CHMP7,TTL,GEN1
1_Member	GO Biological Processes	GO:0140014	mitotic nuclear division	-15.4463	-11.9447	30/268	655,858,891,1062,1063,4085,4288,4751,6790,9055,9319,9493,9787,9820,9928,10051,10274,10592,10783,11004,27085,29127,51203,54443,55165,57520,64151,79075,91782,348654	BMP7,CAV2,CCNB1,CENPE,CENPF,MAD2L1,MKI67,NEK2,AURKA,PRC1,TRIP13,KIF23,DLGAP5,CUL7,KIF14,SMC4,STAG1,SMC2,NEK6,KIF2C,MTBP,RACGAP1,NUSAP1,ANLN,CEP55,HECW2,NCAPG,DSCC1,CHMP7,GEN1
1_Member	GO Biological Processes	GO:0000070	mitotic sister chromatid segregation	-13.6666	-10.2441	22/154	891,1062,1063,4085,4751,9055,9319,9493,9787,9928,10051,10592,10783,11004,29127,51203,55165,57520,64151,79075,91782,348654	CCNB1,CENPE,CENPF,MAD2L1,NEK2,PRC1,TRIP13,KIF23,DLGAP5,KIF14,SMC4,SMC2,NEK6,KIF2C,RACGAP1,NUSAP1,CEP55,HECW2,NCAPG,DSCC1,CHMP7,GEN1
1_Member	GO Biological Processes	GO:0000819	sister chromatid segregation	-13.5306	-10.1751	24/192	891,1062,1063,4085,4751,7153,9055,9319,9493,9787,9928,10051,10274,10592,10783,11004,29127,51203,55165,57520,64151,79075,91782,348654	CCNB1,CENPE,CENPF,MAD2L1,NEK2,TOP2A,PRC1,TRIP13,KIF23,DLGAP5,KIF14,SMC4,STAG1,SMC2,NEK6,KIF2C,RACGAP1,NUSAP1,CEP55,HECW2,NCAPG,DSCC1,CHMP7,GEN1
1_Member	GO Biological Processes	GO:0051301	cell division	-13.3888	-10.0913	41/598	641,890,891,1062,1063,1894,4085,4609,4751,4851,5727,6790,7153,9055,9493,9820,9928,10051,10112,10274,10388,10592,10783,11004,23331,29127,29899,51203,54443,54892,55165,55521,55835,57082,64151,81610,91768,91782,144455,259266,346389	BLM,CCNA2,CCNB1,CENPE,CENPF,ECT2,MAD2L1,MYC,NEK2,NOTCH1,PTCH1,AURKA,TOP2A,PRC1,KIF23,CUL7,KIF14,SMC4,KIF20A,STAG1,SYCP2,SMC2,NEK6,KIF2C,TTC28,RACGAP1,GPSM2,NUSAP1,ANLN,NCAPG2,CEP55,TRIM36,CENPJ,KNL1,NCAPG,FAM83D,CABLES1,CHMP7,E2F7,ASPM,MACC1
1_Member	GO Biological Processes	GO:0051310	metaphase plate congression	-6.12374	-3.49136	9/60	891,1062,1063,9928,11004,55165,81610,91782,150465	CCNB1,CENPE,CENPF,KIF14,KIF2C,CEP55,FAM83D,CHMP7,TTL
1_Member	GO Biological Processes	GO:0051303	establishment of chromosome localization	-6.08679	-3.47728	10/78	891,1062,1063,9787,9928,11004,55165,81610,91782,150465	CCNB1,CENPE,CENPF,DLGAP5,KIF14,KIF2C,CEP55,FAM83D,CHMP7,TTL
1_Member	GO Biological Processes	GO:0050000	chromosome localization	-6.03457	-3.44678	10/79	891,1062,1063,9787,9928,11004,55165,81610,91782,150465	CCNB1,CENPE,CENPF,DLGAP5,KIF14,KIF2C,CEP55,FAM83D,CHMP7,TTL
1_Member	GO Biological Processes	GO:0007080	mitotic metaphase plate congression	-3.85611	-1.7335	6/47	891,1062,9928,11004,55165,91782	CCNB1,CENPE,KIF14,KIF2C,CEP55,CHMP7
2_Summary	GO Biological Processes	GO:0000226	microtubule cytoskeleton organization	-11.5465	-8.30014	37/564	891,1062,3064,4085,4137,4233,4751,6047,6790,6904,7840,9055,9493,9768,9820,9928,10112,10274,10381,10426,10783,10806,11004,25897,26005,29127,29899,50861,51203,55521,55835,57606,63979,150465,259266,344148,348654,9787,55638,57539,1627,1894,2885,6387,8500,22998,23406,57580,596,3720,9847,23236,23274,94104,655,857,11124,23514,54443,56919,64084	CCNB1,CENPE,HTT,MAD2L1,MAPT,MET,NEK2,RNF4,AURKA,TBCD,ALMS1,PRC1,KIF23,PCLAF,CUL7,KIF14,KIF20A,STAG1,TUBB3,TUBGCP3,NEK6,SDCCAG8,KIF2C,RNF19A,C2CD3,RACGAP1,GPSM2,STMN3,NUSAP1,TRIM36,CENPJ,SLAIN2,FIGNL1,TTL,ASPM,NCKAP5,GEN1,DLGAP5,SYBU,WDR35,DBN1,ECT2,GRB2,CXCL12,PPFIA1,LIMCH1,COTL1,PREX1,BCL2,JARID2,C2CD5,PLCB1,CLEC16A,PAXBP1,BMP7,CAV1,FAF1,SPIDR,ANLN,DHX33,CLSTN2
2_Member	GO Biological Processes	GO:0000226	microtubule cytoskeleton organization	-11.5465	-8.30014	37/564	891,1062,3064,4085,4137,4233,4751,6047,6790,6904,7840,9055,9493,9768,9820,9928,10112,10274,10381,10426,10783,10806,11004,25897,26005,29127,29899,50861,51203,55521,55835,57606,63979,150465,259266,344148,348654	CCNB1,CENPE,HTT,MAD2L1,MAPT,MET,NEK2,RNF4,AURKA,TBCD,ALMS1,PRC1,KIF23,PCLAF,CUL7,KIF14,KIF20A,STAG1,TUBB3,TUBGCP3,NEK6,SDCCAG8,KIF2C,RNF19A,C2CD3,RACGAP1,GPSM2,STMN3,NUSAP1,TRIM36,CENPJ,SLAIN2,FIGNL1,TTL,ASPM,NCKAP5,GEN1
2_Member	GO Biological Processes	GO:0007017	microtubule-based process	-9.4502	-6.48007	40/764	891,1062,3064,4085,4137,4233,4751,6047,6790,6904,7840,9055,9493,9768,9787,9820,9928,10112,10274,10381,10426,10783,10806,11004,25897,26005,29127,29899,50861,51203,55521,55638,55835,57539,57606,63979,150465,259266,344148,348654	CCNB1,CENPE,HTT,MAD2L1,MAPT,MET,NEK2,RNF4,AURKA,TBCD,ALMS1,PRC1,KIF23,PCLAF,DLGAP5,CUL7,KIF14,KIF20A,STAG1,TUBB3,TUBGCP3,NEK6,SDCCAG8,KIF2C,RNF19A,C2CD3,RACGAP1,GPSM2,STMN3,NUSAP1,TRIM36,SYBU,CENPJ,WDR35,SLAIN2,FIGNL1,TTL,ASPM,NCKAP5,GEN1
2_Member	GO Biological Processes	GO:0070507	regulation of microtubule cytoskeleton organization	-5.40048	-2.97573	14/186	4137,4233,4751,6047,6790,6904,7840,10274,29899,50861,55521,55835,57606,348654	MAPT,MET,NEK2,RNF4,AURKA,TBCD,ALMS1,STAG1,GPSM2,STMN3,TRIM36,CENPJ,SLAIN2,GEN1
2_Member	GO Biological Processes	GO:0032886	regulation of microtubule-based process	-4.61574	-2.33424	14/218	4137,4233,4751,6047,6790,6904,7840,10274,29899,50861,55521,55835,57606,348654	MAPT,MET,NEK2,RNF4,AURKA,TBCD,ALMS1,STAG1,GPSM2,STMN3,TRIM36,CENPJ,SLAIN2,GEN1
2_Member	GO Biological Processes	GO:0051493	regulation of cytoskeleton organization	-3.85749	-1.7335	22/534	1627,1894,2885,4137,4233,4751,6047,6387,6790,6904,7840,8500,10274,22998,23406,29899,50861,55521,55835,57580,57606,348654	DBN1,ECT2,GRB2,MAPT,MET,NEK2,RNF4,CXCL12,AURKA,TBCD,ALMS1,PPFIA1,STAG1,LIMCH1,COTL1,GPSM2,STMN3,TRIM36,CENPJ,PREX1,SLAIN2,GEN1
2_Member	GO Biological Processes	GO:0010638	positive regulation of organelle organization	-2.26576	-0.609247	20/624	596,891,2885,3064,3720,4137,4233,4751,6790,9787,9847,22998,23236,23274,29899,51203,55835,57539,57606,94104	BCL2,CCNB1,GRB2,HTT,JARID2,MAPT,MET,NEK2,AURKA,DLGAP5,C2CD5,LIMCH1,PLCB1,CLEC16A,GPSM2,NUSAP1,CENPJ,WDR35,SLAIN2,PAXBP1
2_Member	GO Biological Processes	GO:0044089	positive regulation of cellular component biogenesis	-1.3459	-0.0427385	15/541	655,857,2885,3064,4137,4233,11124,22998,23514,29899,54443,55835,56919,57606,64084	BMP7,CAV1,GRB2,HTT,MAPT,MET,FAF1,LIMCH1,SPIDR,GPSM2,ANLN,CENPJ,DHX33,SLAIN2,CLSTN2
3_Summary	GO Biological Processes	GO:0010564	regulation of cell cycle process	-11.2566	-8.05598	44/789	596,641,655,677,858,891,1062,1063,1894,2033,3161,4085,4288,4751,5695,5890,6047,6790,7840,9055,9319,9493,9787,9820,9928,10112,10274,10783,10806,23236,23468,27044,27085,29127,29899,51203,54443,55787,55835,57520,81610,144455,150465,348654,890,1033,4173,4176,4609,4660,5422,6502,7298,9833,91782,5727,5774,7153,23331,220042	BCL2,BLM,BMP7,ZFP36L1,CAV2,CCNB1,CENPE,CENPF,ECT2,EP300,HMMR,MAD2L1,MKI67,NEK2,PSMB7,RAD51B,RNF4,AURKA,ALMS1,PRC1,TRIP13,KIF23,DLGAP5,CUL7,KIF14,KIF20A,STAG1,NEK6,SDCCAG8,PLCB1,CBX5,SND1,MTBP,RACGAP1,GPSM2,NUSAP1,ANLN,TXLNG,CENPJ,HECW2,FAM83D,E2F7,TTL,GEN1,CCNA2,CDKN3,MCM4,MCM7,MYC,PPP1R12B,POLA1,SKP2,TYMS,MELK,CHMP7,PTCH1,PTPN3,TOP2A,TTC28,DDIAS
3_Member	GO Biological Processes	GO:0010564	regulation of cell cycle process	-11.2566	-8.05598	44/789	596,641,655,677,858,891,1062,1063,1894,2033,3161,4085,4288,4751,5695,5890,6047,6790,7840,9055,9319,9493,9787,9820,9928,10112,10274,10783,10806,23236,23468,27044,27085,29127,29899,51203,54443,55787,55835,57520,81610,144455,150465,348654	BCL2,BLM,BMP7,ZFP36L1,CAV2,CCNB1,CENPE,CENPF,ECT2,EP300,HMMR,MAD2L1,MKI67,NEK2,PSMB7,RAD51B,RNF4,AURKA,ALMS1,PRC1,TRIP13,KIF23,DLGAP5,CUL7,KIF14,KIF20A,STAG1,NEK6,SDCCAG8,PLCB1,CBX5,SND1,MTBP,RACGAP1,GPSM2,NUSAP1,ANLN,TXLNG,CENPJ,HECW2,FAM83D,E2F7,TTL,GEN1
3_Member	GO Biological Processes	GO:0044772	mitotic cell cycle phase transition	-11.0159	-7.85671	37/588	596,641,677,890,891,1033,1062,1063,2033,3161,4085,4173,4176,4609,4660,4751,5422,5695,5890,6502,6790,7298,7840,9319,9787,9833,9928,10783,10806,23236,27085,54443,55835,57520,91782,144455,348654	BCL2,BLM,ZFP36L1,CCNA2,CCNB1,CDKN3,CENPE,CENPF,EP300,HMMR,MAD2L1,MCM4,MCM7,MYC,PPP1R12B,NEK2,POLA1,PSMB7,RAD51B,SKP2,AURKA,TYMS,ALMS1,TRIP13,DLGAP5,MELK,KIF14,NEK6,SDCCAG8,PLCB1,MTBP,ANLN,CENPJ,HECW2,CHMP7,E2F7,GEN1
3_Member	GO Biological Processes	GO:0007346	regulation of mitotic cell cycle	-10.7422	-7.65066	39/661	596,641,655,677,858,891,1062,1063,2033,3161,4085,4288,4751,5695,5727,5774,5890,6790,7153,7840,9319,9787,9820,9928,10274,10783,10806,23236,23331,27085,29899,51203,54443,55835,57520,144455,150465,220042,348654	BCL2,BLM,BMP7,ZFP36L1,CAV2,CCNB1,CENPE,CENPF,EP300,HMMR,MAD2L1,MKI67,NEK2,PSMB7,PTCH1,PTPN3,RAD51B,AURKA,TOP2A,ALMS1,TRIP13,DLGAP5,CUL7,KIF14,STAG1,NEK6,SDCCAG8,PLCB1,TTC28,MTBP,GPSM2,NUSAP1,ANLN,CENPJ,HECW2,E2F7,TTL,DDIAS,GEN1
3_Member	GO Biological Processes	GO:0044770	cell cycle phase transition	-10.7373	-7.65066	38/631	596,641,677,890,891,1033,1062,1063,2033,3161,4085,4173,4176,4609,4660,4751,5422,5695,5890,6502,6790,7298,7840,9319,9787,9833,9928,10783,10806,23236,27085,54443,55835,57520,81610,91782,144455,348654	BCL2,BLM,ZFP36L1,CCNA2,CCNB1,CDKN3,CENPE,CENPF,EP300,HMMR,MAD2L1,MCM4,MCM7,MYC,PPP1R12B,NEK2,POLA1,PSMB7,RAD51B,SKP2,AURKA,TYMS,ALMS1,TRIP13,DLGAP5,MELK,KIF14,NEK6,SDCCAG8,PLCB1,MTBP,ANLN,CENPJ,HECW2,FAM83D,CHMP7,E2F7,GEN1
3_Member	GO Biological Processes	GO:1901990	regulation of mitotic cell cycle phase transition	-7.26049	-4.40233	26/444	596,641,677,891,1062,1063,2033,3161,4085,4751,5695,5890,6790,7840,9319,9787,9928,10783,10806,23236,27085,54443,55835,57520,144455,348654	BCL2,BLM,ZFP36L1,CCNB1,CENPE,CENPF,EP300,HMMR,MAD2L1,NEK2,PSMB7,RAD51B,AURKA,ALMS1,TRIP13,DLGAP5,KIF14,NEK6,SDCCAG8,PLCB1,MTBP,ANLN,CENPJ,HECW2,E2F7,GEN1
3_Member	GO Biological Processes	GO:1901987	regulation of cell cycle phase transition	-7.16116	-4.32231	27/480	596,641,677,891,1062,1063,2033,3161,4085,4751,5695,5890,6790,7840,9319,9787,9928,10783,10806,23236,27085,54443,55835,57520,81610,144455,348654	BCL2,BLM,ZFP36L1,CCNB1,CENPE,CENPF,EP300,HMMR,MAD2L1,NEK2,PSMB7,RAD51B,AURKA,ALMS1,TRIP13,DLGAP5,KIF14,NEK6,SDCCAG8,PLCB1,MTBP,ANLN,CENPJ,HECW2,FAM83D,E2F7,GEN1
3_Member	GO Biological Processes	GO:0000086	G2/M transition of mitotic cell cycle	-5.88786	-3.3405	17/247	641,890,891,1063,3161,4660,4751,5695,5890,6502,6790,7840,9833,9928,10806,23236,55835	BLM,CCNA2,CCNB1,CENPF,HMMR,PPP1R12B,NEK2,PSMB7,RAD51B,SKP2,AURKA,ALMS1,MELK,KIF14,SDCCAG8,PLCB1,CENPJ
3_Member	GO Biological Processes	GO:0044839	cell cycle G2/M phase transition	-5.45044	-3.00573	17/266	641,890,891,1063,3161,4660,4751,5695,5890,6502,6790,7840,9833,9928,10806,23236,55835	BLM,CCNA2,CCNB1,CENPF,HMMR,PPP1R12B,NEK2,PSMB7,RAD51B,SKP2,AURKA,ALMS1,MELK,KIF14,SDCCAG8,PLCB1,CENPJ
3_Member	GO Biological Processes	GO:0010389	regulation of G2/M transition of mitotic cell cycle	-3.84252	-1.72473	12/196	641,891,1063,3161,4751,5695,5890,6790,7840,9928,10806,55835	BLM,CCNB1,CENPF,HMMR,NEK2,PSMB7,RAD51B,AURKA,ALMS1,KIF14,SDCCAG8,CENPJ
3_Member	GO Biological Processes	GO:1902749	regulation of cell cycle G2/M phase transition	-3.50875	-1.48426	12/213	641,891,1063,3161,4751,5695,5890,6790,7840,9928,10806,55835	BLM,CCNB1,CENPF,HMMR,NEK2,PSMB7,RAD51B,AURKA,ALMS1,KIF14,SDCCAG8,CENPJ
4_Summary	GO Biological Processes	GO:0007088	regulation of mitotic nuclear division	-10.155	-7.1006	19/166	655,858,891,1062,1063,4085,4288,4751,6790,9319,9787,9820,10274,10783,27085,51203,54443,57520,348654,23236,1894,11004,29127,150465,7153,596,641,677,2033,5695,5774,144455,220042,3720,4137,4609,6047,94104,23468,857,1676,3146,4233,4851,5793,6904,7057,7337,8500,9928,23274,56937	BMP7,CAV2,CCNB1,CENPE,CENPF,MAD2L1,MKI67,NEK2,AURKA,TRIP13,DLGAP5,CUL7,STAG1,NEK6,MTBP,NUSAP1,ANLN,HECW2,GEN1,PLCB1,ECT2,KIF2C,RACGAP1,TTL,TOP2A,BCL2,BLM,ZFP36L1,EP300,PSMB7,PTPN3,E2F7,DDIAS,JARID2,MAPT,MYC,RNF4,PAXBP1,CBX5,CAV1,DFFA,HMGB1,MET,NOTCH1,PTPRG,TBCD,THBS1,UBE3A,PPFIA1,KIF14,CLEC16A,PMEPA1
4_Member	GO Biological Processes	GO:0007088	regulation of mitotic nuclear division	-10.155	-7.1006	19/166	655,858,891,1062,1063,4085,4288,4751,6790,9319,9787,9820,10274,10783,27085,51203,54443,57520,348654	BMP7,CAV2,CCNB1,CENPE,CENPF,MAD2L1,MKI67,NEK2,AURKA,TRIP13,DLGAP5,CUL7,STAG1,NEK6,MTBP,NUSAP1,ANLN,HECW2,GEN1
4_Member	GO Biological Processes	GO:0051783	regulation of nuclear division	-9.99301	-6.96853	20/190	655,858,891,1062,1063,4085,4288,4751,6790,9319,9787,9820,10274,10783,23236,27085,51203,54443,57520,348654	BMP7,CAV2,CCNB1,CENPE,CENPF,MAD2L1,MKI67,NEK2,AURKA,TRIP13,DLGAP5,CUL7,STAG1,NEK6,PLCB1,MTBP,NUSAP1,ANLN,HECW2,GEN1
4_Member	GO Biological Processes	GO:0051983	regulation of chromosome segregation	-9.62857	-6.63211	15/103	891,1062,1063,1894,4085,4288,4751,9319,9787,10783,11004,29127,57520,150465,348654	CCNB1,CENPE,CENPF,ECT2,MAD2L1,MKI67,NEK2,TRIP13,DLGAP5,NEK6,KIF2C,RACGAP1,HECW2,TTL,GEN1
4_Member	GO Biological Processes	GO:0030071	regulation of mitotic metaphase/anaphase transition	-6.75163	-3.93127	9/51	891,1062,1063,4085,9319,9787,10783,57520,348654	CCNB1,CENPE,CENPF,MAD2L1,TRIP13,DLGAP5,NEK6,HECW2,GEN1
4_Member	GO Biological Processes	GO:1902099	regulation of metaphase/anaphase transition of cell cycle	-6.60132	-3.79868	9/53	891,1062,1063,4085,9319,9787,10783,57520,348654	CCNB1,CENPE,CENPF,MAD2L1,TRIP13,DLGAP5,NEK6,HECW2,GEN1
4_Member	GO Biological Processes	GO:0007091	metaphase/anaphase transition of mitotic cell cycle	-6.52866	-3.75852	9/54	891,1062,1063,4085,9319,9787,10783,57520,348654	CCNB1,CENPE,CENPF,MAD2L1,TRIP13,DLGAP5,NEK6,HECW2,GEN1
4_Member	GO Biological Processes	GO:0044784	metaphase/anaphase transition of cell cycle	-6.388	-3.66454	9/56	891,1062,1063,4085,9319,9787,10783,57520,348654	CCNB1,CENPE,CENPF,MAD2L1,TRIP13,DLGAP5,NEK6,HECW2,GEN1
4_Member	GO Biological Processes	GO:0010965	regulation of mitotic sister chromatid separation	-6.31988	-3.62446	9/57	891,1062,1063,4085,9319,9787,10783,57520,348654	CCNB1,CENPE,CENPF,MAD2L1,TRIP13,DLGAP5,NEK6,HECW2,GEN1
4_Member	GO Biological Processes	GO:0051306	mitotic sister chromatid separation	-6.12374	-3.49136	9/60	891,1062,1063,4085,9319,9787,10783,57520,348654	CCNB1,CENPE,CENPF,MAD2L1,TRIP13,DLGAP5,NEK6,HECW2,GEN1
4_Member	GO Biological Processes	GO:1905818	regulation of chromosome separation	-5.99932	-3.42199	9/62	891,1062,1063,4085,9319,9787,10783,57520,348654	CCNB1,CENPE,CENPF,MAD2L1,TRIP13,DLGAP5,NEK6,HECW2,GEN1
4_Member	GO Biological Processes	GO:0033047	regulation of mitotic sister chromatid segregation	-5.65292	-3.14254	9/68	891,1062,1063,4085,9319,9787,10783,57520,348654	CCNB1,CENPE,CENPF,MAD2L1,TRIP13,DLGAP5,NEK6,HECW2,GEN1
4_Member	GO Biological Processes	GO:0051304	chromosome separation	-5.50782	-3.03152	10/90	891,1062,1063,4085,7153,9319,9787,10783,57520,348654	CCNB1,CENPE,CENPF,MAD2L1,TOP2A,TRIP13,DLGAP5,NEK6,HECW2,GEN1
4_Member	GO Biological Processes	GO:0033045	regulation of sister chromatid segregation	-5.05831	-2.70899	9/80	891,1062,1063,4085,9319,9787,10783,57520,348654	CCNB1,CENPE,CENPF,MAD2L1,TRIP13,DLGAP5,NEK6,HECW2,GEN1
4_Member	GO Biological Processes	GO:0045839	negative regulation of mitotic nuclear division	-4.56656	-2.3055	7/52	655,891,1063,4085,9319,27085,348654	BMP7,CCNB1,CENPF,MAD2L1,TRIP13,MTBP,GEN1
4_Member	GO Biological Processes	GO:0051784	negative regulation of nuclear division	-4.15684	-1.94749	7/60	655,891,1063,4085,9319,27085,348654	BMP7,CCNB1,CENPF,MAD2L1,TRIP13,MTBP,GEN1
4_Member	GO Biological Processes	GO:0045930	negative regulation of mitotic cell cycle	-4.11526	-1.92329	17/338	596,641,655,677,891,1063,2033,4085,5695,5774,6790,7153,9319,27085,144455,220042,348654	BCL2,BLM,BMP7,ZFP36L1,CCNB1,CENPF,EP300,MAD2L1,PSMB7,PTPN3,AURKA,TOP2A,TRIP13,MTBP,E2F7,DDIAS,GEN1
4_Member	GO Biological Processes	GO:0033044	regulation of chromosome organization	-4.00709	-1.84394	17/345	891,1062,1063,3720,4085,4137,4288,4609,4751,6047,7153,9319,9787,10783,57520,94104,348654	CCNB1,CENPE,CENPF,JARID2,MAD2L1,MAPT,MKI67,MYC,NEK2,RNF4,TOP2A,TRIP13,DLGAP5,NEK6,HECW2,PAXBP1,GEN1
4_Member	GO Biological Processes	GO:0007094	mitotic spindle assembly checkpoint	-3.58854	-1.55528	5/34	891,1063,4085,9319,348654	CCNB1,CENPF,MAD2L1,TRIP13,GEN1
4_Member	GO Biological Processes	GO:0031577	spindle checkpoint	-3.58854	-1.55528	5/34	891,1063,4085,9319,348654	CCNB1,CENPF,MAD2L1,TRIP13,GEN1
4_Member	GO Biological Processes	GO:0071173	spindle assembly checkpoint	-3.58854	-1.55528	5/34	891,1063,4085,9319,348654	CCNB1,CENPF,MAD2L1,TRIP13,GEN1
4_Member	GO Biological Processes	GO:0071174	mitotic spindle checkpoint	-3.58854	-1.55528	5/34	891,1063,4085,9319,348654	CCNB1,CENPF,MAD2L1,TRIP13,GEN1
4_Member	GO Biological Processes	GO:0045841	negative regulation of mitotic metaphase/anaphase transition	-3.46877	-1.45852	5/36	891,1063,4085,9319,348654	CCNB1,CENPF,MAD2L1,TRIP13,GEN1
4_Member	GO Biological Processes	GO:1902100	negative regulation of metaphase/anaphase transition of cell cycle	-3.41177	-1.42604	5/37	891,1063,4085,9319,348654	CCNB1,CENPF,MAD2L1,TRIP13,GEN1
4_Member	GO Biological Processes	GO:2000816	negative regulation of mitotic sister chromatid separation	-3.30301	-1.32891	5/39	891,1063,4085,9319,348654	CCNB1,CENPF,MAD2L1,TRIP13,GEN1
4_Member	GO Biological Processes	GO:0010948	negative regulation of cell cycle process	-3.294	-1.32388	16/361	596,641,655,677,891,1063,2033,4085,4751,5695,6790,9319,23468,27085,144455,348654	BCL2,BLM,BMP7,ZFP36L1,CCNB1,CENPF,EP300,MAD2L1,NEK2,PSMB7,AURKA,TRIP13,CBX5,MTBP,E2F7,GEN1
4_Member	GO Biological Processes	GO:0007093	mitotic cell cycle checkpoint	-3.2601	-1.3075	10/165	641,891,1063,2033,4085,6790,7153,9319,144455,348654	BLM,CCNB1,CENPF,EP300,MAD2L1,AURKA,TOP2A,TRIP13,E2F7,GEN1
4_Member	GO Biological Processes	GO:1905819	negative regulation of chromosome separation	-3.25107	-1.30091	5/40	891,1063,4085,9319,348654	CCNB1,CENPF,MAD2L1,TRIP13,GEN1
4_Member	GO Biological Processes	GO:0033048	negative regulation of mitotic sister chromatid segregation	-3.15162	-1.23434	5/42	891,1063,4085,9319,348654	CCNB1,CENPF,MAD2L1,TRIP13,GEN1
4_Member	GO Biological Processes	GO:0033046	negative regulation of sister chromatid segregation	-3.05762	-1.15151	5/44	891,1063,4085,9319,348654	CCNB1,CENPF,MAD2L1,TRIP13,GEN1
4_Member	GO Biological Processes	GO:0051985	negative regulation of chromosome segregation	-3.0125	-1.11295	5/45	891,1063,4085,9319,348654	CCNB1,CENPF,MAD2L1,TRIP13,GEN1
4_Member	GO Biological Processes	GO:0051129	negative regulation of cellular component organization	-2.97081	-1.0883	25/745	655,857,891,1063,1676,2033,3146,3720,4085,4137,4233,4751,4851,5793,6904,7057,7153,7337,8500,9319,9928,23274,27085,56937,348654	BMP7,CAV1,CCNB1,CENPF,DFFA,EP300,HMGB1,JARID2,MAD2L1,MAPT,MET,NEK2,NOTCH1,PTPRG,TBCD,THBS1,TOP2A,UBE3A,PPFIA1,TRIP13,KIF14,CLEC16A,MTBP,PMEPA1,GEN1
4_Member	GO Biological Processes	GO:1901991	negative regulation of mitotic cell cycle phase transition	-2.92584	-1.05365	12/248	596,641,677,891,1063,2033,4085,5695,6790,9319,144455,348654	BCL2,BLM,ZFP36L1,CCNB1,CENPF,EP300,MAD2L1,PSMB7,AURKA,TRIP13,E2F7,GEN1
4_Member	GO Biological Processes	GO:0090231	regulation of spindle checkpoint	-2.81018	-0.984347	3/14	891,4085,348654	CCNB1,MAD2L1,GEN1
4_Member	GO Biological Processes	GO:0090266	regulation of mitotic cell cycle spindle assembly checkpoint	-2.81018	-0.984347	3/14	891,4085,348654	CCNB1,MAD2L1,GEN1
4_Member	GO Biological Processes	GO:1903504	regulation of mitotic spindle checkpoint	-2.81018	-0.984347	3/14	891,4085,348654	CCNB1,MAD2L1,GEN1
4_Member	GO Biological Processes	GO:1901988	negative regulation of cell cycle phase transition	-2.65691	-0.871352	12/267	596,641,677,891,1063,2033,4085,5695,6790,9319,144455,348654	BCL2,BLM,ZFP36L1,CCNB1,CENPF,EP300,MAD2L1,PSMB7,AURKA,TRIP13,E2F7,GEN1
4_Member	GO Biological Processes	GO:0010639	negative regulation of organelle organization	-2.4706	-0.745698	15/395	655,891,1063,3720,4085,4137,4233,4751,6904,7153,8500,9319,23274,27085,348654	BMP7,CCNB1,CENPF,JARID2,MAD2L1,MAPT,MET,NEK2,TBCD,TOP2A,PPFIA1,TRIP13,CLEC16A,MTBP,GEN1
4_Member	GO Biological Processes	GO:0000075	cell cycle checkpoint	-2.391	-0.691483	10/216	641,891,1063,2033,4085,6790,7153,9319,144455,348654	BLM,CCNB1,CENPF,EP300,MAD2L1,AURKA,TOP2A,TRIP13,E2F7,GEN1
4_Member	GO Biological Processes	GO:2001251	negative regulation of chromosome organization	-1.89738	-0.386999	7/146	891,1063,3720,4085,7153,9319,348654	CCNB1,CENPF,JARID2,MAD2L1,TOP2A,TRIP13,GEN1
4_Member	GO Biological Processes	GO:1901976	regulation of cell cycle checkpoint	-1.77381	-0.308835	3/32	891,4085,348654	CCNB1,MAD2L1,GEN1
5_Summary	GO Biological Processes	GO:0051640	organelle localization	-8.24752	-5.30221	36/706	488,858,891,1062,1063,1759,3064,4085,4137,4751,4905,4927,5265,6790,7840,9493,9787,9928,10806,11004,26005,29899,51134,51203,55165,55638,55835,60412,81610,91782,93664,117177,140730,150465,152579,259266	ATP2A2,CAV2,CCNB1,CENPE,CENPF,DNM1,HTT,MAD2L1,MAPT,NEK2,NSF,NUP88,SERPINA1,AURKA,ALMS1,KIF23,DLGAP5,KIF14,SDCCAG8,KIF2C,C2CD3,GPSM2,CEP83,NUSAP1,CEP55,SYBU,CENPJ,EXOC4,FAM83D,CHMP7,CADPS2,RAB3IP,RIMS4,TTL,SCFD2,ASPM
5_Member	GO Biological Processes	GO:0051640	organelle localization	-8.24752	-5.30221	36/706	488,858,891,1062,1063,1759,3064,4085,4137,4751,4905,4927,5265,6790,7840,9493,9787,9928,10806,11004,26005,29899,51134,51203,55165,55638,55835,60412,81610,91782,93664,117177,140730,150465,152579,259266	ATP2A2,CAV2,CCNB1,CENPE,CENPF,DNM1,HTT,MAD2L1,MAPT,NEK2,NSF,NUP88,SERPINA1,AURKA,ALMS1,KIF23,DLGAP5,KIF14,SDCCAG8,KIF2C,C2CD3,GPSM2,CEP83,NUSAP1,CEP55,SYBU,CENPJ,EXOC4,FAM83D,CHMP7,CADPS2,RAB3IP,RIMS4,TTL,SCFD2,ASPM
5_Member	GO Biological Processes	GO:0051656	establishment of organelle localization	-6.09905	-3.47826	26/510	488,891,1062,1063,1759,3064,4085,4137,4905,4927,5265,9493,9787,9928,11004,29899,51134,51203,55165,55638,60412,81610,91782,93664,140730,150465	ATP2A2,CCNB1,CENPE,CENPF,DNM1,HTT,MAD2L1,MAPT,NSF,NUP88,SERPINA1,KIF23,DLGAP5,KIF14,KIF2C,GPSM2,CEP83,NUSAP1,CEP55,SYBU,EXOC4,FAM83D,CHMP7,CADPS2,RIMS4,TTL
5_Member	GO Biological Processes	GO:0051650	establishment of vesicle localization	-1.55182	-0.17613	10/291	488,1759,3064,4905,5265,9493,55638,60412,93664,140730	ATP2A2,DNM1,HTT,NSF,SERPINA1,KIF23,SYBU,EXOC4,CADPS2,RIMS4
5_Member	GO Biological Processes	GO:0051648	vesicle localization	-1.41703	-0.0833353	10/307	488,1759,3064,4905,5265,9493,55638,60412,93664,140730	ATP2A2,DNM1,HTT,NSF,SERPINA1,KIF23,SYBU,EXOC4,CADPS2,RIMS4
6_Summary	GO Biological Processes	GO:0022616	DNA strand elongation	-7.95938	-5.03755	8/27	4173,4176,5422,5425,5983,10714,51659,64710,580,641,890,4774,5985,9156,9768,11124,79075,144455,348654,1063,4609,4751,7298,10715,1676,3146,23201,23514,63979,64210,2033,596,760,4851,9215,25861,55765,3148,27044,55775	MCM4,MCM7,POLA1,POLD2,RFC3,POLD3,GINS2,NUCKS1,BARD1,BLM,CCNA2,NFIA,RFC5,EXO1,PCLAF,FAF1,DSCC1,E2F7,GEN1,CENPF,MYC,NEK2,TYMS,CERS1,DFFA,HMGB1,FAM168A,SPIDR,FIGNL1,MMS19,EP300,BCL2,CA2,NOTCH1,LARGE1,WHRN,INAVA,HMGB2,SND1,TDP1
6_Member	GO Biological Processes	GO:0022616	DNA strand elongation	-7.95938	-5.03755	8/27	4173,4176,5422,5425,5983,10714,51659,64710	MCM4,MCM7,POLA1,POLD2,RFC3,POLD3,GINS2,NUCKS1
6_Member	GO Biological Processes	GO:0006271	DNA strand elongation involved in DNA replication	-7.59983	-4.70028	7/20	4173,4176,5422,5425,5983,10714,51659	MCM4,MCM7,POLA1,POLD2,RFC3,POLD3,GINS2
6_Member	GO Biological Processes	GO:0006260	DNA replication	-6.51193	-3.75852	19/276	580,641,890,4173,4176,4774,5422,5425,5983,5985,9156,9768,10714,11124,51659,64710,79075,144455,348654	BARD1,BLM,CCNA2,MCM4,MCM7,NFIA,POLA1,POLD2,RFC3,RFC5,EXO1,PCLAF,POLD3,FAF1,GINS2,NUCKS1,DSCC1,E2F7,GEN1
6_Member	GO Biological Processes	GO:0006261	DNA-dependent DNA replication	-5.60509	-3.10348	13/154	641,4173,4176,5422,5425,5983,5985,10714,51659,64710,79075,144455,348654	BLM,MCM4,MCM7,POLA1,POLD2,RFC3,RFC5,POLD3,GINS2,NUCKS1,DSCC1,E2F7,GEN1
6_Member	GO Biological Processes	GO:0044786	cell cycle DNA replication	-4.51783	-2.26173	8/72	4173,4176,5422,5425,5983,5985,10714,144455	MCM4,MCM7,POLA1,POLD2,RFC3,RFC5,POLD3,E2F7
6_Member	GO Biological Processes	GO:0033260	nuclear DNA replication	-4.11023	-1.92249	7/61	4173,4176,5422,5425,5983,5985,10714	MCM4,MCM7,POLA1,POLD2,RFC3,RFC5,POLD3
6_Member	GO Biological Processes	GO:0032201	telomere maintenance via semi-conservative replication	-4.08348	-1.89993	5/27	5422,5425,5983,5985,10714	POLA1,POLD2,RFC3,RFC5,POLD3
6_Member	GO Biological Processes	GO:1900262	regulation of DNA-directed DNA polymerase activity	-3.78867	-1.68924	3/7	5983,5985,79075	RFC3,RFC5,DSCC1
6_Member	GO Biological Processes	GO:1900264	positive regulation of DNA-directed DNA polymerase activity	-3.78867	-1.68924	3/7	5983,5985,79075	RFC3,RFC5,DSCC1
6_Member	GO Biological Processes	GO:0071897	DNA biosynthetic process	-3.76052	-1.67389	12/200	1063,4609,4751,5422,5425,5983,5985,7298,9768,10714,10715,79075	CENPF,MYC,NEK2,POLA1,POLD2,RFC3,RFC5,TYMS,PCLAF,POLD3,CERS1,DSCC1
6_Member	GO Biological Processes	GO:0000731	DNA synthesis involved in DNA repair	-3.65636	-1.59147	6/51	5422,5425,5983,5985,9768,10714	POLA1,POLD2,RFC3,RFC5,PCLAF,POLD3
6_Member	GO Biological Processes	GO:0006275	regulation of DNA replication	-3.27968	-1.3121	8/108	641,890,5983,5985,11124,64710,79075,144455	BLM,CCNA2,RFC3,RFC5,FAF1,NUCKS1,DSCC1,E2F7
6_Member	GO Biological Processes	GO:0019985	translesion synthesis	-3.20063	-1.27189	5/41	5425,5983,5985,9768,10714	POLD2,RFC3,RFC5,PCLAF,POLD3
6_Member	GO Biological Processes	GO:0006297	nucleotide-excision repair, DNA gap filling	-3.17382	-1.24971	4/24	5425,5983,5985,10714	POLD2,RFC3,RFC5,POLD3
6_Member	GO Biological Processes	GO:0051052	regulation of DNA metabolic process	-2.9027	-1.04455	17/431	641,890,1676,3146,4609,4751,5983,5985,10715,11124,23201,23514,63979,64210,64710,79075,144455	BLM,CCNA2,DFFA,HMGB1,MYC,NEK2,RFC3,RFC5,CERS1,FAF1,FAM168A,SPIDR,FIGNL1,MMS19,NUCKS1,DSCC1,E2F7
6_Member	GO Biological Processes	GO:0006301	postreplication repair	-2.72684	-0.915514	5/52	5425,5983,5985,9768,10714	POLD2,RFC3,RFC5,PCLAF,POLD3
6_Member	GO Biological Processes	GO:0000723	telomere maintenance	-2.72516	-0.915514	9/162	641,4609,4751,5422,5425,5983,5985,9156,10714	BLM,MYC,NEK2,POLA1,POLD2,RFC3,RFC5,EXO1,POLD3
6_Member	GO Biological Processes	GO:0051054	positive regulation of DNA metabolic process	-2.71692	-0.914288	11/228	3146,4609,4751,5983,5985,11124,23201,23514,64210,79075,144455	HMGB1,MYC,NEK2,RFC3,RFC5,FAF1,FAM168A,SPIDR,MMS19,DSCC1,E2F7
6_Member	GO Biological Processes	GO:0090329	regulation of DNA-dependent DNA replication	-2.65363	-0.871352	5/54	641,5983,5985,79075,144455	BLM,RFC3,RFC5,DSCC1,E2F7
6_Member	GO Biological Processes	GO:0006289	nucleotide-excision repair	-2.53346	-0.788388	7/111	2033,5422,5425,5983,5985,10714,64210	EP300,POLA1,POLD2,RFC3,RFC5,POLD3,MMS19
6_Member	GO Biological Processes	GO:0032200	telomere organization	-2.49921	-0.768657	9/175	641,4609,4751,5422,5425,5983,5985,9156,10714	BLM,MYC,NEK2,POLA1,POLD2,RFC3,RFC5,EXO1,POLD3
6_Member	GO Biological Processes	GO:0006296	nucleotide-excision repair, DNA incision, 5'-to lesion	-2.45587	-0.737926	4/37	5425,5983,5985,10714	POLD2,RFC3,RFC5,POLD3
6_Member	GO Biological Processes	GO:0060249	anatomical structure homeostasis	-2.44511	-0.731672	16/437	580,596,641,760,4609,4751,4851,5422,5425,5983,5985,9156,9215,10714,25861,55765	BARD1,BCL2,BLM,CA2,MYC,NEK2,NOTCH1,POLA1,POLD2,RFC3,RFC5,EXO1,LARGE1,POLD3,WHRN,INAVA
6_Member	GO Biological Processes	GO:0006298	mismatch repair	-2.41335	-0.711083	4/38	3146,5425,9156,10714	HMGB1,POLD2,EXO1,POLD3
6_Member	GO Biological Processes	GO:0033683	nucleotide-excision repair, DNA incision	-2.37213	-0.680759	4/39	5425,5983,5985,10714	POLD2,RFC3,RFC5,POLD3
6_Member	GO Biological Processes	GO:0042769	DNA damage response, detection of DNA damage	-2.37213	-0.680759	4/39	5425,5983,5985,10714	POLD2,RFC3,RFC5,POLD3
6_Member	GO Biological Processes	GO:2000573	positive regulation of DNA biosynthetic process	-2.24666	-0.592622	5/67	4609,4751,5983,5985,79075	MYC,NEK2,RFC3,RFC5,DSCC1
6_Member	GO Biological Processes	GO:0006283	transcription-coupled nucleotide-excision repair	-2.09063	-0.492055	5/73	2033,5425,5983,5985,10714	EP300,POLD2,RFC3,RFC5,POLD3
6_Member	GO Biological Processes	GO:2000278	regulation of DNA biosynthetic process	-1.90779	-0.392312	6/112	4609,4751,5983,5985,10715,79075	MYC,NEK2,RFC3,RFC5,CERS1,DSCC1
6_Member	GO Biological Processes	GO:0090305	nucleic acid phosphodiester bond hydrolysis	-1.81641	-0.333499	11/303	1676,3146,3148,5425,5983,5985,9156,10714,27044,55775,348654	DFFA,HMGB1,HMGB2,POLD2,RFC3,RFC5,EXO1,POLD3,SND1,TDP1,GEN1
7_Summary	GO Biological Processes	GO:0071103	DNA conformation change	-7.27032	-4.40233	22/327	641,891,3146,3148,4173,4176,5983,5985,6732,7153,10051,10592,23523,25788,50809,51203,51659,54892,57082,64151,64754,79075	BLM,CCNB1,HMGB1,HMGB2,MCM4,MCM7,RFC3,RFC5,SRPK1,TOP2A,SMC4,SMC2,CABIN1,RAD54B,HP1BP3,NUSAP1,GINS2,NCAPG2,KNL1,NCAPG,SMYD3,DSCC1
7_Member	GO Biological Processes	GO:0071103	DNA conformation change	-7.27032	-4.40233	22/327	641,891,3146,3148,4173,4176,5983,5985,6732,7153,10051,10592,23523,25788,50809,51203,51659,54892,57082,64151,64754,79075	BLM,CCNB1,HMGB1,HMGB2,MCM4,MCM7,RFC3,RFC5,SRPK1,TOP2A,SMC4,SMC2,CABIN1,RAD54B,HP1BP3,NUSAP1,GINS2,NCAPG2,KNL1,NCAPG,SMYD3,DSCC1
7_Member	GO Biological Processes	GO:0030261	chromosome condensation	-4.86263	-2.54855	7/47	891,7153,10051,10592,51203,54892,64151	CCNB1,TOP2A,SMC4,SMC2,NUSAP1,NCAPG2,NCAPG
7_Member	GO Biological Processes	GO:0006323	DNA packaging	-4.16402	-1.95022	13/210	891,3148,6732,7153,10051,10592,23523,50809,51203,54892,57082,64151,64754	CCNB1,HMGB2,SRPK1,TOP2A,SMC4,SMC2,CABIN1,HP1BP3,NUSAP1,NCAPG2,KNL1,NCAPG,SMYD3
7_Member	GO Biological Processes	GO:0007076	mitotic chromosome condensation	-3.78272	-1.68924	4/17	10051,10592,51203,64151	SMC4,SMC2,NUSAP1,NCAPG
8_Summary	GO Biological Processes	GO:0051321	meiotic cell cycle	-6.51204	-3.75852	18/249	3955,4603,4751,5890,6790,7153,9156,9319,10051,10388,10426,10592,23236,25788,55706,63979,84057,259266	LFNG,MYBL1,NEK2,RAD51B,AURKA,TOP2A,EXO1,TRIP13,SMC4,SYCP2,TUBGCP3,SMC2,PLCB1,RAD54B,NDC1,FIGNL1,MND1,ASPM
8_Member	GO Biological Processes	GO:0051321	meiotic cell cycle	-6.51204	-3.75852	18/249	3955,4603,4751,5890,6790,7153,9156,9319,10051,10388,10426,10592,23236,25788,55706,63979,84057,259266	LFNG,MYBL1,NEK2,RAD51B,AURKA,TOP2A,EXO1,TRIP13,SMC4,SYCP2,TUBGCP3,SMC2,PLCB1,RAD54B,NDC1,FIGNL1,MND1,ASPM
8_Member	GO Biological Processes	GO:0140013	meiotic nuclear division	-5.8011	-3.27263	14/172	4603,5890,6790,7153,9319,10051,10388,10592,23236,25788,55706,63979,84057,259266	MYBL1,RAD51B,AURKA,TOP2A,TRIP13,SMC4,SYCP2,SMC2,PLCB1,RAD54B,NDC1,FIGNL1,MND1,ASPM
8_Member	GO Biological Processes	GO:1903046	meiotic cell cycle process	-5.34641	-2.94517	14/188	4603,5890,6790,7153,9319,10051,10388,10592,23236,25788,55706,63979,84057,259266	MYBL1,RAD51B,AURKA,TOP2A,TRIP13,SMC4,SYCP2,SMC2,PLCB1,RAD54B,NDC1,FIGNL1,MND1,ASPM
8_Member	GO Biological Processes	GO:0007127	meiosis I	-3.83221	-1.72154	9/114	4603,5890,6790,7153,9319,10388,25788,55706,84057	MYBL1,RAD51B,AURKA,TOP2A,TRIP13,SYCP2,RAD54B,NDC1,MND1
8_Member	GO Biological Processes	GO:0061982	meiosis I cell cycle process	-3.69067	-1.6172	9/119	4603,5890,6790,7153,9319,10388,25788,55706,84057	MYBL1,RAD51B,AURKA,TOP2A,TRIP13,SYCP2,RAD54B,NDC1,MND1
8_Member	GO Biological Processes	GO:0007131	reciprocal meiotic recombination	-2.68982	-0.89748	5/53	5890,7153,9319,25788,84057	RAD51B,TOP2A,TRIP13,RAD54B,MND1
8_Member	GO Biological Processes	GO:0035825	homologous recombination	-2.65363	-0.871352	5/54	5890,7153,9319,25788,84057	RAD51B,TOP2A,TRIP13,RAD54B,MND1
8_Member	GO Biological Processes	GO:0045132	meiotic chromosome segregation	-2.35817	-0.674792	6/90	7153,9319,10051,10388,10592,55706	TOP2A,TRIP13,SMC4,SYCP2,SMC2,NDC1
8_Member	GO Biological Processes	GO:0070192	chromosome organization involved in meiotic cell cycle	-2.3026	-0.633506	5/65	9319,10051,10388,10592,55706	TRIP13,SMC4,SYCP2,SMC2,NDC1
8_Member	GO Biological Processes	GO:0007140	male meiotic nuclear division	-2.05004	-0.470644	4/48	4603,9319,10388,63979	MYBL1,TRIP13,SYCP2,FIGNL1
8_Member	GO Biological Processes	GO:0007129	synapsis	-1.36315	-0.0524312	3/46	9319,10388,55706	TRIP13,SYCP2,NDC1
9_Summary	GO Biological Processes	GO:0006281	DNA repair	-6.46594	-3.72776	28/553	580,641,2033,3146,3148,4173,4176,5422,5425,5890,5983,5985,7374,9156,9319,9768,10714,23201,23514,25788,51659,55215,55775,63979,64210,64710,348654,375748,7153,84057,79075	BARD1,BLM,EP300,HMGB1,HMGB2,MCM4,MCM7,POLA1,POLD2,RAD51B,RFC3,RFC5,UNG,EXO1,TRIP13,PCLAF,POLD3,FAM168A,SPIDR,RAD54B,GINS2,FANCI,TDP1,FIGNL1,MMS19,NUCKS1,GEN1,ERCC6L2,TOP2A,MND1,DSCC1
9_Member	GO Biological Processes	GO:0006281	DNA repair	-6.46594	-3.72776	28/553	580,641,2033,3146,3148,4173,4176,5422,5425,5890,5983,5985,7374,9156,9319,9768,10714,23201,23514,25788,51659,55215,55775,63979,64210,64710,348654,375748	BARD1,BLM,EP300,HMGB1,HMGB2,MCM4,MCM7,POLA1,POLD2,RAD51B,RFC3,RFC5,UNG,EXO1,TRIP13,PCLAF,POLD3,FAM168A,SPIDR,RAD54B,GINS2,FANCI,TDP1,FIGNL1,MMS19,NUCKS1,GEN1,ERCC6L2
9_Member	GO Biological Processes	GO:0006310	DNA recombination	-5.49407	-3.02588	18/293	641,3146,3148,4173,4176,5890,7153,7374,9156,9319,23514,25788,51659,63979,64210,64710,84057,348654	BLM,HMGB1,HMGB2,MCM4,MCM7,RAD51B,TOP2A,UNG,EXO1,TRIP13,SPIDR,RAD54B,GINS2,FIGNL1,MMS19,NUCKS1,MND1,GEN1
9_Member	GO Biological Processes	GO:0032392	DNA geometric change	-5.21022	-2.84216	11/119	641,3146,3148,4173,4176,5983,5985,7153,25788,51659,79075	BLM,HMGB1,HMGB2,MCM4,MCM7,RFC3,RFC5,TOP2A,RAD54B,GINS2,DSCC1
9_Member	GO Biological Processes	GO:0000724	double-strand break repair via homologous recombination	-4.718	-2.41871	11/134	641,4173,4176,5890,23514,25788,51659,63979,64210,64710,348654	BLM,MCM4,MCM7,RAD51B,SPIDR,RAD54B,GINS2,FIGNL1,MMS19,NUCKS1,GEN1
9_Member	GO Biological Processes	GO:0000725	recombinational repair	-4.68766	-2.39557	11/135	641,4173,4176,5890,23514,25788,51659,63979,64210,64710,348654	BLM,MCM4,MCM7,RAD51B,SPIDR,RAD54B,GINS2,FIGNL1,MMS19,NUCKS1,GEN1
9_Member	GO Biological Processes	GO:0006302	double-strand break repair	-4.5976	-2.3213	15/248	580,641,4173,4176,5422,5890,9319,23514,25788,51659,55775,63979,64210,64710,348654	BARD1,BLM,MCM4,MCM7,POLA1,RAD51B,TRIP13,SPIDR,RAD54B,GINS2,TDP1,FIGNL1,MMS19,NUCKS1,GEN1
9_Member	GO Biological Processes	GO:0032508	DNA duplex unwinding	-3.95122	-1.80372	9/110	641,4173,4176,5983,5985,7153,25788,51659,79075	BLM,MCM4,MCM7,RFC3,RFC5,TOP2A,RAD54B,GINS2,DSCC1
9_Member	GO Biological Processes	GO:0000727	double-strand break repair via break-induced replication	-3.13731	-1.22229	3/11	4173,4176,51659	MCM4,MCM7,GINS2
9_Member	GO Biological Processes	GO:0006268	DNA unwinding involved in DNA replication	-2.81018	-0.984347	3/14	641,4173,4176	BLM,MCM4,MCM7
9_Member	GO Biological Processes	GO:0006270	DNA replication initiation	-1.60582	-0.215347	3/37	4173,4176,5422	MCM4,MCM7,POLA1
10_Summary	GO Biological Processes	GO:0000281	mitotic cytokinesis	-6.36044	-3.65123	10/73	1894,9493,9820,10112,29127,51203,54443,55165,55521,91782,891,1062,4751,11004,57082,6790,9055,9928,144455,3064,4085,10274,29899,6047,10426,10783,259266,641,4609,5727,346389	ECT2,KIF23,CUL7,KIF20A,RACGAP1,NUSAP1,ANLN,CEP55,TRIM36,CHMP7,CCNB1,CENPE,NEK2,KIF2C,KNL1,AURKA,PRC1,KIF14,E2F7,HTT,MAD2L1,STAG1,GPSM2,RNF4,TUBGCP3,NEK6,ASPM,BLM,MYC,PTCH1,MACC1
10_Member	GO Biological Processes	GO:0000281	mitotic cytokinesis	-6.36044	-3.65123	10/73	1894,9493,9820,10112,29127,51203,54443,55165,55521,91782	ECT2,KIF23,CUL7,KIF20A,RACGAP1,NUSAP1,ANLN,CEP55,TRIM36,CHMP7
10_Member	GO Biological Processes	GO:0008608	attachment of spindle microtubules to kinetochore	-6.03871	-3.44678	7/32	891,1062,1894,4751,11004,29127,57082	CCNB1,CENPE,ECT2,NEK2,KIF2C,RACGAP1,KNL1
10_Member	GO Biological Processes	GO:0000912	assembly of actomyosin apparatus involved in cytokinesis	-5.91861	-3.36148	4/6	1894,9493,29127,54443	ECT2,KIF23,RACGAP1,ANLN
10_Member	GO Biological Processes	GO:0000915	actomyosin contractile ring assembly	-5.91861	-3.36148	4/6	1894,9493,29127,54443	ECT2,KIF23,RACGAP1,ANLN
10_Member	GO Biological Processes	GO:0000910	cytokinesis	-5.8313	-3.29348	14/171	1894,6790,9055,9493,9820,9928,10112,29127,51203,54443,55165,55521,91782,144455	ECT2,AURKA,PRC1,KIF23,CUL7,KIF14,KIF20A,RACGAP1,NUSAP1,ANLN,CEP55,TRIM36,CHMP7,E2F7
10_Member	GO Biological Processes	GO:0044837	actomyosin contractile ring organization	-5.55652	-3.06351	4/7	1894,9493,29127,54443	ECT2,KIF23,RACGAP1,ANLN
10_Member	GO Biological Processes	GO:1902850	microtubule cytoskeleton organization involved in mitosis	-5.48601	-3.02579	12/134	891,1062,3064,4085,4751,6790,9055,9493,10274,29127,29899,51203	CCNB1,CENPE,HTT,MAD2L1,NEK2,AURKA,PRC1,KIF23,STAG1,RACGAP1,GPSM2,NUSAP1
10_Member	GO Biological Processes	GO:0032506	cytokinetic process	-5.42339	-2.98624	7/39	1894,9493,10112,29127,54443,55165,91782	ECT2,KIF23,KIF20A,RACGAP1,ANLN,CEP55,CHMP7
10_Member	GO Biological Processes	GO:0007051	spindle organization	-5.37335	-2.96516	14/187	891,1062,4751,6047,6790,9055,9493,10274,10426,10783,29127,29899,55521,259266	CCNB1,CENPE,NEK2,RNF4,AURKA,PRC1,KIF23,STAG1,TUBGCP3,NEK6,RACGAP1,GPSM2,TRIM36,ASPM
10_Member	GO Biological Processes	GO:0051302	regulation of cell division	-5.18753	-2.82581	13/168	641,1894,4609,5727,6790,9055,9493,9928,10112,29127,144455,259266,346389	BLM,ECT2,MYC,PTCH1,AURKA,PRC1,KIF23,KIF14,KIF20A,RACGAP1,E2F7,ASPM,MACC1
10_Member	GO Biological Processes	GO:0061640	cytoskeleton-dependent cytokinesis	-5.09245	-2.73698	10/100	1894,9493,9820,10112,29127,51203,54443,55165,55521,91782	ECT2,KIF23,CUL7,KIF20A,RACGAP1,NUSAP1,ANLN,CEP55,TRIM36,CHMP7
10_Member	GO Biological Processes	GO:0051988	regulation of attachment of spindle microtubules to kinetochore	-4.43538	-2.18419	4/12	891,1894,4751,29127	CCNB1,ECT2,NEK2,RACGAP1
10_Member	GO Biological Processes	GO:0051225	spindle assembly	-4.24526	-2.01316	10/125	4751,6047,6790,9493,10274,10426,10783,29127,29899,259266	NEK2,RNF4,AURKA,KIF23,STAG1,TUBGCP3,NEK6,RACGAP1,GPSM2,ASPM
10_Member	GO Biological Processes	GO:0007052	mitotic spindle organization	-3.98183	-1.82657	9/109	891,1062,4751,6790,9055,9493,10274,29127,29899	CCNB1,CENPE,NEK2,AURKA,PRC1,KIF23,STAG1,RACGAP1,GPSM2
10_Member	GO Biological Processes	GO:0032465	regulation of cytokinesis	-3.85592	-1.7335	8/89	1894,6790,9055,9493,9928,10112,29127,144455	ECT2,AURKA,PRC1,KIF23,KIF14,KIF20A,RACGAP1,E2F7
10_Member	GO Biological Processes	GO:0000022	mitotic spindle elongation	-3.4195	-1.43097	3/9	9055,9493,29127	PRC1,KIF23,RACGAP1
10_Member	GO Biological Processes	GO:0051231	spindle elongation	-3.2701	-1.30757	3/10	9055,9493,29127	PRC1,KIF23,RACGAP1
10_Member	GO Biological Processes	GO:0032467	positive regulation of cytokinesis	-2.33215	-0.65844	4/40	1894,9493,9928,29127	ECT2,KIF23,KIF14,RACGAP1
10_Member	GO Biological Processes	GO:0030866	cortical actin cytoskeleton organization	-2.21901	-0.579537	4/43	1894,9493,29127,54443	ECT2,KIF23,RACGAP1,ANLN
10_Member	GO Biological Processes	GO:0030865	cortical cytoskeleton organization	-2.05004	-0.470644	4/48	1894,9493,29127,54443	ECT2,KIF23,RACGAP1,ANLN
10_Member	GO Biological Processes	GO:0051781	positive regulation of cell division	-1.78279	-0.313799	5/87	1894,9493,9928,29127,346389	ECT2,KIF23,KIF14,RACGAP1,MACC1
10_Member	GO Biological Processes	GO:0090307	mitotic spindle assembly	-1.744	-0.294707	4/59	4751,9493,10274,29127	NEK2,KIF23,STAG1,RACGAP1
11_Summary	GO Biological Processes	GO:0001889	liver development	-6.25498	-3.57292	13/135	3720,4233,4851,5727,5774,6715,6790,7298,9821,55959,57539,64841,144455,596,607,890,891,4548,5738,6387,9215,655,857,3488,5361,7337,10272	JARID2,MET,NOTCH1,PTCH1,PTPN3,SRD5A1,AURKA,TYMS,RB1CC1,SULF2,WDR35,GNPNAT1,E2F7,BCL2,BCL9,CCNA2,CCNB1,MTR,PTGFRN,CXCL12,LARGE1,BMP7,CAV1,IGFBP5,PLXNA1,UBE3A,FSTL3
11_Member	GO Biological Processes	GO:0001889	liver development	-6.25498	-3.57292	13/135	3720,4233,4851,5727,5774,6715,6790,7298,9821,55959,57539,64841,144455	JARID2,MET,NOTCH1,PTCH1,PTPN3,SRD5A1,AURKA,TYMS,RB1CC1,SULF2,WDR35,GNPNAT1,E2F7
11_Member	GO Biological Processes	GO:0061008	hepaticobiliary system development	-6.14505	-3.49136	13/138	3720,4233,4851,5727,5774,6715,6790,7298,9821,55959,57539,64841,144455	JARID2,MET,NOTCH1,PTCH1,PTPN3,SRD5A1,AURKA,TYMS,RB1CC1,SULF2,WDR35,GNPNAT1,E2F7
11_Member	GO Biological Processes	GO:0031099	regeneration	-5.77894	-3.25961	15/198	596,607,890,891,4548,4851,5727,5738,5774,6387,6790,7298,9215,55959,57539	BCL2,BCL9,CCNA2,CCNB1,MTR,NOTCH1,PTCH1,PTGFRN,PTPN3,CXCL12,AURKA,TYMS,LARGE1,SULF2,WDR35
11_Member	GO Biological Processes	GO:0031100	animal organ regeneration	-5.39098	-2.97573	9/73	890,4851,5727,5774,6387,6790,7298,55959,57539	CCNA2,NOTCH1,PTCH1,PTPN3,CXCL12,AURKA,TYMS,SULF2,WDR35
11_Member	GO Biological Processes	GO:0097421	liver regeneration	-5.00746	-2.6715	6/30	5727,5774,6790,7298,55959,57539	PTCH1,PTPN3,AURKA,TYMS,SULF2,WDR35
11_Member	GO Biological Processes	GO:0048732	gland development	-4.19247	-1.96961	20/435	596,655,857,3488,3720,4233,4851,5361,5727,5774,6715,6790,7298,7337,9821,10272,55959,57539,64841,144455	BCL2,BMP7,CAV1,IGFBP5,JARID2,MET,NOTCH1,PLXNA1,PTCH1,PTPN3,SRD5A1,AURKA,TYMS,UBE3A,RB1CC1,FSTL3,SULF2,WDR35,GNPNAT1,E2F7
12_Summary	GO Biological Processes	GO:0000904	cell morphogenesis involved in differentiation	-6.19474	-3.52564	33/745	596,655,1523,1627,2033,2885,4137,4233,4851,5361,5727,5979,6387,6498,6904,7074,7337,9820,9928,10160,10381,10439,25861,57493,57520,57580,79834,80781,85451,90249,91584,150465,285220,1894,2889,5793,23426,79191,221935,259266,857,3064,4651,10806,54443,55835,6790,10428,128486,64084,4548,9821,64798,23406,50809,2321,3146,3148,7057,57539	BCL2,BMP7,CUX1,DBN1,EP300,GRB2,MAPT,MET,NOTCH1,PLXNA1,PTCH1,RET,CXCL12,SKIL,TBCD,TIAM1,UBE3A,CUL7,KIF14,FARP1,TUBB3,OLFM1,WHRN,HEG1,HECW2,PREX1,PEAK1,COL18A1,UNK,UNC5A,PLXNA4,TTL,EPHA6,ECT2,RAPGEF1,PTPRG,GRIP1,IRX3,SDK1,ASPM,CAV1,HTT,MYO10,SDCCAG8,ANLN,CENPJ,AURKA,CFDP1,FITM2,CLSTN2,MTR,RB1CC1,DEPTOR,COTL1,HP1BP3,FLT1,HMGB1,HMGB2,THBS1,WDR35
12_Member	GO Biological Processes	GO:0000904	cell morphogenesis involved in differentiation	-6.19474	-3.52564	33/745	596,655,1523,1627,2033,2885,4137,4233,4851,5361,5727,5979,6387,6498,6904,7074,7337,9820,9928,10160,10381,10439,25861,57493,57520,57580,79834,80781,85451,90249,91584,150465,285220	BCL2,BMP7,CUX1,DBN1,EP300,GRB2,MAPT,MET,NOTCH1,PLXNA1,PTCH1,RET,CXCL12,SKIL,TBCD,TIAM1,UBE3A,CUL7,KIF14,FARP1,TUBB3,OLFM1,WHRN,HEG1,HECW2,PREX1,PEAK1,COL18A1,UNK,UNC5A,PLXNA4,TTL,EPHA6
12_Member	GO Biological Processes	GO:0048667	cell morphogenesis involved in neuron differentiation	-5.04612	-2.70288	26/583	596,655,1523,1627,2885,4137,4851,5361,5727,5979,6387,6498,6904,7074,7337,9820,10160,10381,10439,25861,57520,85451,90249,91584,150465,285220	BCL2,BMP7,CUX1,DBN1,GRB2,MAPT,NOTCH1,PLXNA1,PTCH1,RET,CXCL12,SKIL,TBCD,TIAM1,UBE3A,CUL7,FARP1,TUBB3,OLFM1,WHRN,HECW2,UNK,UNC5A,PLXNA4,TTL,EPHA6
12_Member	GO Biological Processes	GO:0045664	regulation of neuron differentiation	-4.17954	-1.96123	26/656	596,655,1523,1627,1894,2033,2889,4137,4851,5361,5793,5979,6387,6498,7074,7337,9820,10439,23426,57520,57580,79191,91584,150465,221935,259266	BCL2,BMP7,CUX1,DBN1,ECT2,EP300,RAPGEF1,MAPT,NOTCH1,PLXNA1,PTPRG,RET,CXCL12,SKIL,TIAM1,UBE3A,CUL7,OLFM1,GRIP1,HECW2,PREX1,IRX3,PLXNA4,TTL,SDK1,ASPM
12_Member	GO Biological Processes	GO:0120035	regulation of plasma membrane bounded cell projection organization	-4.14176	-1.93682	27/698	655,857,1523,1627,2033,2889,3064,4137,4651,5361,5793,5979,6387,6498,7074,7337,9820,10439,10806,23426,54443,55835,57520,57580,91584,150465,221935	BMP7,CAV1,CUX1,DBN1,EP300,RAPGEF1,HTT,MAPT,MYO10,PLXNA1,PTPRG,RET,CXCL12,SKIL,TIAM1,UBE3A,CUL7,OLFM1,SDCCAG8,GRIP1,ANLN,CENPJ,HECW2,PREX1,PLXNA4,TTL,SDK1
12_Member	GO Biological Processes	GO:0031344	regulation of cell projection organization	-4.03936	-1.86409	27/708	655,857,1523,1627,2033,2889,3064,4137,4651,5361,5793,5979,6387,6498,7074,7337,9820,10439,10806,23426,54443,55835,57520,57580,91584,150465,221935	BMP7,CAV1,CUX1,DBN1,EP300,RAPGEF1,HTT,MAPT,MYO10,PLXNA1,PTPRG,RET,CXCL12,SKIL,TIAM1,UBE3A,CUL7,OLFM1,SDCCAG8,GRIP1,ANLN,CENPJ,HECW2,PREX1,PLXNA4,TTL,SDK1
12_Member	GO Biological Processes	GO:0048812	neuron projection morphogenesis	-3.85813	-1.7335	25/648	596,655,1523,1627,2885,4137,4851,5361,5727,5979,6387,6498,6790,7074,7337,9820,10160,10381,10439,23426,57520,90249,91584,150465,285220	BCL2,BMP7,CUX1,DBN1,GRB2,MAPT,NOTCH1,PLXNA1,PTCH1,RET,CXCL12,SKIL,AURKA,TIAM1,UBE3A,CUL7,FARP1,TUBB3,OLFM1,GRIP1,HECW2,UNC5A,PLXNA4,TTL,EPHA6
12_Member	GO Biological Processes	GO:0010975	regulation of neuron projection development	-3.83353	-1.72154	21/499	655,1523,1627,2033,2889,4137,5361,5793,5979,6387,6498,7074,7337,9820,10439,23426,57520,57580,91584,150465,221935	BMP7,CUX1,DBN1,EP300,RAPGEF1,MAPT,PLXNA1,PTPRG,RET,CXCL12,SKIL,TIAM1,UBE3A,CUL7,OLFM1,GRIP1,HECW2,PREX1,PLXNA4,TTL,SDK1
12_Member	GO Biological Processes	GO:0120039	plasma membrane bounded cell projection morphogenesis	-3.71616	-1.63943	25/662	596,655,1523,1627,2885,4137,4851,5361,5727,5979,6387,6498,6790,7074,7337,9820,10160,10381,10439,23426,57520,90249,91584,150465,285220	BCL2,BMP7,CUX1,DBN1,GRB2,MAPT,NOTCH1,PLXNA1,PTCH1,RET,CXCL12,SKIL,AURKA,TIAM1,UBE3A,CUL7,FARP1,TUBB3,OLFM1,GRIP1,HECW2,UNC5A,PLXNA4,TTL,EPHA6
12_Member	GO Biological Processes	GO:0048858	cell projection morphogenesis	-3.67653	-1.60629	25/666	596,655,1523,1627,2885,4137,4851,5361,5727,5979,6387,6498,6790,7074,7337,9820,10160,10381,10439,23426,57520,90249,91584,150465,285220	BCL2,BMP7,CUX1,DBN1,GRB2,MAPT,NOTCH1,PLXNA1,PTCH1,RET,CXCL12,SKIL,AURKA,TIAM1,UBE3A,CUL7,FARP1,TUBB3,OLFM1,GRIP1,HECW2,UNC5A,PLXNA4,TTL,EPHA6
12_Member	GO Biological Processes	GO:0010769	regulation of cell morphogenesis involved in differentiation	-3.65532	-1.59147	15/301	1523,1627,4137,5361,5979,6387,6498,7074,7337,9820,10439,57520,57580,91584,150465	CUX1,DBN1,MAPT,PLXNA1,RET,CXCL12,SKIL,TIAM1,UBE3A,CUL7,OLFM1,HECW2,PREX1,PLXNA4,TTL
12_Member	GO Biological Processes	GO:0045666	positive regulation of neuron differentiation	-3.63209	-1.57453	17/371	596,655,1523,1627,1894,2033,2889,4137,5361,5979,6387,6498,7074,9820,23426,79191,91584	BCL2,BMP7,CUX1,DBN1,ECT2,EP300,RAPGEF1,MAPT,PLXNA1,RET,CXCL12,SKIL,TIAM1,CUL7,GRIP1,IRX3,PLXNA4
12_Member	GO Biological Processes	GO:0010770	positive regulation of cell morphogenesis involved in differentiation	-3.49712	-1.47839	10/154	1523,1627,4137,5361,6387,6498,7074,9820,57580,91584	CUX1,DBN1,MAPT,PLXNA1,CXCL12,SKIL,TIAM1,CUL7,PREX1,PLXNA4
12_Member	GO Biological Processes	GO:0032990	cell part morphogenesis	-3.49372	-1.47784	25/685	596,655,1523,1627,2885,4137,4851,5361,5727,5979,6387,6498,6790,7074,7337,9820,10160,10381,10439,23426,57520,90249,91584,150465,285220	BCL2,BMP7,CUX1,DBN1,GRB2,MAPT,NOTCH1,PLXNA1,PTCH1,RET,CXCL12,SKIL,AURKA,TIAM1,UBE3A,CUL7,FARP1,TUBB3,OLFM1,GRIP1,HECW2,UNC5A,PLXNA4,TTL,EPHA6
12_Member	GO Biological Processes	GO:0031346	positive regulation of cell projection organization	-3.47207	-1.45902	17/383	655,1523,1627,2033,2889,3064,4137,5361,5979,6387,6498,7074,9820,23426,54443,55835,91584	BMP7,CUX1,DBN1,EP300,RAPGEF1,HTT,MAPT,PLXNA1,RET,CXCL12,SKIL,TIAM1,CUL7,GRIP1,ANLN,CENPJ,PLXNA4
12_Member	GO Biological Processes	GO:0010976	positive regulation of neuron projection development	-3.44828	-1.4436	14/281	655,1523,1627,2033,2889,4137,5361,5979,6387,6498,7074,9820,23426,91584	BMP7,CUX1,DBN1,EP300,RAPGEF1,MAPT,PLXNA1,RET,CXCL12,SKIL,TIAM1,CUL7,GRIP1,PLXNA4
12_Member	GO Biological Processes	GO:0050769	positive regulation of neurogenesis	-3.26328	-1.3075	19/474	596,655,1523,1627,1894,2033,2889,4137,4851,5361,5979,6387,6498,7074,9820,23426,79191,91584,259266	BCL2,BMP7,CUX1,DBN1,ECT2,EP300,RAPGEF1,MAPT,NOTCH1,PLXNA1,RET,CXCL12,SKIL,TIAM1,CUL7,GRIP1,IRX3,PLXNA4,ASPM
12_Member	GO Biological Processes	GO:0010720	positive regulation of cell development	-3.24097	-1.2991	21/553	596,655,1523,1627,1894,2033,2889,4137,4851,5361,5979,6387,6498,6790,7074,9820,23426,57580,79191,91584,259266	BCL2,BMP7,CUX1,DBN1,ECT2,EP300,RAPGEF1,MAPT,NOTCH1,PLXNA1,RET,CXCL12,SKIL,AURKA,TIAM1,CUL7,GRIP1,PREX1,IRX3,PLXNA4,ASPM
12_Member	GO Biological Processes	GO:0050772	positive regulation of axonogenesis	-3.20809	-1.27703	7/85	1627,4137,5361,6387,6498,7074,91584	DBN1,MAPT,PLXNA1,CXCL12,SKIL,TIAM1,PLXNA4
12_Member	GO Biological Processes	GO:0022604	regulation of cell morphogenesis	-3.15462	-1.23508	19/484	1523,1627,4137,4651,5361,5979,6387,6498,7074,7337,9820,10428,10439,23426,57520,57580,91584,128486,150465	CUX1,DBN1,MAPT,MYO10,PLXNA1,RET,CXCL12,SKIL,TIAM1,UBE3A,CUL7,CFDP1,OLFM1,GRIP1,HECW2,PREX1,PLXNA4,FITM2,TTL
12_Member	GO Biological Processes	GO:0051962	positive regulation of nervous system development	-2.97151	-1.0883	20/541	596,655,1523,1627,1894,2033,2889,4137,4851,5361,5979,6387,6498,7074,9820,23426,64084,79191,91584,259266	BCL2,BMP7,CUX1,DBN1,ECT2,EP300,RAPGEF1,MAPT,NOTCH1,PLXNA1,RET,CXCL12,SKIL,TIAM1,CUL7,GRIP1,CLSTN2,IRX3,PLXNA4,ASPM
12_Member	GO Biological Processes	GO:0007409	axonogenesis	-2.91806	-1.05194	18/468	596,655,1627,2885,4137,4851,5361,5727,5979,6387,6498,7074,10381,10439,90249,91584,150465,285220	BCL2,BMP7,DBN1,GRB2,MAPT,NOTCH1,PLXNA1,PTCH1,RET,CXCL12,SKIL,TIAM1,TUBB3,OLFM1,UNC5A,PLXNA4,TTL,EPHA6
12_Member	GO Biological Processes	GO:0050770	regulation of axonogenesis	-2.91496	-1.05084	10/183	1627,4137,5361,5979,6387,6498,7074,10439,91584,150465	DBN1,MAPT,PLXNA1,RET,CXCL12,SKIL,TIAM1,OLFM1,PLXNA4,TTL
12_Member	GO Biological Processes	GO:0061564	axon development	-2.84982	-1.01286	19/514	596,655,1627,2885,4137,4548,4851,5361,5727,5979,6387,6498,7074,10381,10439,90249,91584,150465,285220	BCL2,BMP7,DBN1,GRB2,MAPT,MTR,NOTCH1,PLXNA1,PTCH1,RET,CXCL12,SKIL,TIAM1,TUBB3,OLFM1,UNC5A,PLXNA4,TTL,EPHA6
12_Member	GO Biological Processes	GO:1990138	neuron projection extension	-2.61786	-0.85503	9/168	1627,4137,5361,6387,6790,7074,10439,91584,150465	DBN1,MAPT,PLXNA1,CXCL12,AURKA,TIAM1,OLFM1,PLXNA4,TTL
12_Member	GO Biological Processes	GO:0008361	regulation of cell size	-2.41847	-0.714826	9/180	1627,4137,5979,6387,9821,10439,64798,91584,150465	DBN1,MAPT,RET,CXCL12,RB1CC1,OLFM1,DEPTOR,PLXNA4,TTL
12_Member	GO Biological Processes	GO:0030516	regulation of axon extension	-2.22201	-0.580139	6/96	1627,4137,6387,10439,91584,150465	DBN1,MAPT,CXCL12,OLFM1,PLXNA4,TTL
12_Member	GO Biological Processes	GO:0060560	developmental growth involved in morphogenesis	-2.13938	-0.517438	10/235	1627,4137,4851,5361,6387,6790,7074,10439,91584,150465	DBN1,MAPT,NOTCH1,PLXNA1,CXCL12,AURKA,TIAM1,OLFM1,PLXNA4,TTL
12_Member	GO Biological Processes	GO:0032535	regulation of cellular component size	-1.94533	-0.414074	13/370	1627,2885,4137,5979,6387,9821,10439,23406,50809,57580,64798,91584,150465	DBN1,GRB2,MAPT,RET,CXCL12,RB1CC1,OLFM1,COTL1,HP1BP3,PREX1,DEPTOR,PLXNA4,TTL
12_Member	GO Biological Processes	GO:0061387	regulation of extent of cell growth	-1.94368	-0.413891	6/110	1627,4137,6387,10439,91584,150465	DBN1,MAPT,CXCL12,OLFM1,PLXNA4,TTL
12_Member	GO Biological Processes	GO:0042330	taxis	-1.80575	-0.328626	19/647	655,2033,2321,2885,3146,3148,4233,4851,5361,5727,5979,6387,7057,7074,10381,57580,90249,91584,285220	BMP7,EP300,FLT1,GRB2,HMGB1,HMGB2,MET,NOTCH1,PLXNA1,PTCH1,RET,CXCL12,THBS1,TIAM1,TUBB3,PREX1,UNC5A,PLXNA4,EPHA6
12_Member	GO Biological Processes	GO:0048675	axon extension	-1.7565	-0.298651	6/121	1627,4137,6387,10439,91584,150465	DBN1,MAPT,CXCL12,OLFM1,PLXNA4,TTL
12_Member	GO Biological Processes	GO:0048588	developmental cell growth	-1.7151	-0.274941	9/234	1627,4137,5361,6387,6790,7074,10439,91584,150465	DBN1,MAPT,PLXNA1,CXCL12,AURKA,TIAM1,OLFM1,PLXNA4,TTL
12_Member	GO Biological Processes	GO:0007411	axon guidance	-1.69014	-0.262621	10/276	655,2885,5361,5727,5979,6387,10381,90249,91584,285220	BMP7,GRB2,PLXNA1,PTCH1,RET,CXCL12,TUBB3,UNC5A,PLXNA4,EPHA6
12_Member	GO Biological Processes	GO:0097485	neuron projection guidance	-1.68053	-0.254474	10/277	655,2885,5361,5727,5979,6387,10381,90249,91584,285220	BMP7,GRB2,PLXNA1,PTCH1,RET,CXCL12,TUBB3,UNC5A,PLXNA4,EPHA6
12_Member	GO Biological Processes	GO:0090066	regulation of anatomical structure size	-1.55333	-0.176875	15/507	857,1627,2885,4137,5979,6387,9821,10439,23406,50809,57539,57580,64798,91584,150465	CAV1,DBN1,GRB2,MAPT,RET,CXCL12,RB1CC1,OLFM1,COTL1,HP1BP3,WDR35,PREX1,DEPTOR,PLXNA4,TTL
12_Member	GO Biological Processes	GO:0006935	chemotaxis	-1.54433	-0.173054	18/645	655,2321,2885,3146,3148,4233,4851,5361,5727,5979,6387,7057,7074,10381,57580,90249,91584,285220	BMP7,FLT1,GRB2,HMGB1,HMGB2,MET,NOTCH1,PLXNA1,PTCH1,RET,CXCL12,THBS1,TIAM1,TUBB3,PREX1,UNC5A,PLXNA4,EPHA6
12_Member	GO Biological Processes	GO:0045773	positive regulation of axon extension	-1.43705	-0.0968151	3/43	1627,4137,6387	DBN1,MAPT,CXCL12
13_Summary	GO Biological Processes	GO:0034330	cell junction organization	-5.53579	-3.05122	18/291	596,857,1894,2889,3909,4301,5796,6904,7057,22998,25861,54549,55765,57493,60437,79834,144100,221935,655,2885,3146,3714,4651,4851,5361,5793,5979,6387,7045,8754,9928,10272,11124,57580,91584,3488,23143,23236,7074,8500	BCL2,CAV1,ECT2,RAPGEF1,LAMA3,AFDN,PTPRK,TBCD,THBS1,LIMCH1,WHRN,SDK2,INAVA,HEG1,CDH26,PEAK1,PLEKHA7,SDK1,BMP7,GRB2,HMGB1,JAG2,MYO10,NOTCH1,PLXNA1,PTPRG,RET,CXCL12,TGFBI,ADAM9,KIF14,FSTL3,FAF1,PREX1,PLXNA4,IGFBP5,LRCH1,PLCB1,TIAM1,PPFIA1
13_Member	GO Biological Processes	GO:0034330	cell junction organization	-5.53579	-3.05122	18/291	596,857,1894,2889,3909,4301,5796,6904,7057,22998,25861,54549,55765,57493,60437,79834,144100,221935	BCL2,CAV1,ECT2,RAPGEF1,LAMA3,AFDN,PTPRK,TBCD,THBS1,LIMCH1,WHRN,SDK2,INAVA,HEG1,CDH26,PEAK1,PLEKHA7,SDK1
13_Member	GO Biological Processes	GO:0034332	adherens junction organization	-3.7826	-1.68924	10/142	596,4301,5796,6904,7057,22998,55765,60437,79834,144100	BCL2,AFDN,PTPRK,TBCD,THBS1,LIMCH1,INAVA,CDH26,PEAK1,PLEKHA7
13_Member	GO Biological Processes	GO:0034329	cell junction assembly	-3.57008	-1.53977	13/241	596,857,1894,2889,3909,4301,5796,6904,7057,22998,57493,60437,79834	BCL2,CAV1,ECT2,RAPGEF1,LAMA3,AFDN,PTPRK,TBCD,THBS1,LIMCH1,HEG1,CDH26,PEAK1
13_Member	GO Biological Processes	GO:0030155	regulation of cell adhesion	-3.41936	-1.43097	25/693	596,655,857,2885,3146,3714,3909,4301,4651,4851,5361,5793,5979,6387,6904,7045,7057,8754,9928,10272,11124,22998,57580,79834,91584	BCL2,BMP7,CAV1,GRB2,HMGB1,JAG2,LAMA3,AFDN,MYO10,NOTCH1,PLXNA1,PTPRG,RET,CXCL12,TBCD,TGFBI,THBS1,ADAM9,KIF14,FSTL3,FAF1,LIMCH1,PREX1,PEAK1,PLXNA4
13_Member	GO Biological Processes	GO:0034333	adherens junction assembly	-2.35817	-0.674792	6/90	596,5796,6904,7057,22998,79834	BCL2,PTPRK,TBCD,THBS1,LIMCH1,PEAK1
13_Member	GO Biological Processes	GO:0007044	cell-substrate junction assembly	-2.20039	-0.56566	6/97	596,3909,5796,7057,22998,79834	BCL2,LAMA3,PTPRK,THBS1,LIMCH1,PEAK1
13_Member	GO Biological Processes	GO:0007045	cell-substrate adherens junction assembly	-1.90625	-0.392312	5/81	596,5796,7057,22998,79834	BCL2,PTPRK,THBS1,LIMCH1,PEAK1
13_Member	GO Biological Processes	GO:0048041	focal adhesion assembly	-1.90625	-0.392312	5/81	596,5796,7057,22998,79834	BCL2,PTPRK,THBS1,LIMCH1,PEAK1
13_Member	GO Biological Processes	GO:0030336	negative regulation of cell migration	-1.90366	-0.390611	12/334	596,3146,3488,4301,4851,5793,5796,6387,7057,22998,23143,23236	BCL2,HMGB1,IGFBP5,AFDN,NOTCH1,PTPRG,PTPRK,CXCL12,THBS1,LIMCH1,LRCH1,PLCB1
13_Member	GO Biological Processes	GO:2000146	negative regulation of cell motility	-1.7679	-0.307134	12/349	596,3146,3488,4301,4851,5793,5796,6387,7057,22998,23143,23236	BCL2,HMGB1,IGFBP5,AFDN,NOTCH1,PTPRG,PTPRK,CXCL12,THBS1,LIMCH1,LRCH1,PLCB1
13_Member	GO Biological Processes	GO:1901888	regulation of cell junction assembly	-1.7633	-0.30387	5/88	857,2889,7057,22998,79834	CAV1,RAPGEF1,THBS1,LIMCH1,PEAK1
13_Member	GO Biological Processes	GO:0031589	cell-substrate adhesion	-1.70792	-0.271896	12/356	596,4851,5796,6904,7057,7074,8500,8754,9928,22998,57580,79834	BCL2,NOTCH1,PTPRK,TBCD,THBS1,TIAM1,PPFIA1,ADAM9,KIF14,LIMCH1,PREX1,PEAK1
13_Member	GO Biological Processes	GO:0051271	negative regulation of cellular component movement	-1.48748	-0.130804	12/384	596,3146,3488,4301,4851,5793,5796,6387,7057,22998,23143,23236	BCL2,HMGB1,IGFBP5,AFDN,NOTCH1,PTPRG,PTPRK,CXCL12,THBS1,LIMCH1,LRCH1,PLCB1
13_Member	GO Biological Processes	GO:0040013	negative regulation of locomotion	-1.40174	-0.0756413	12/396	596,3146,3488,4301,4851,5793,5796,6387,7057,22998,23143,23236	BCL2,HMGB1,IGFBP5,AFDN,NOTCH1,PTPRG,PTPRK,CXCL12,THBS1,LIMCH1,LRCH1,PLCB1
13_Member	GO Biological Processes	GO:0007160	cell-matrix adhesion	-1.39504	-0.0712536	8/226	596,5796,7057,7074,8500,8754,22998,79834	BCL2,PTPRK,THBS1,TIAM1,PPFIA1,ADAM9,LIMCH1,PEAK1
14_Summary	GO Biological Processes	GO:0072657	protein localization to membrane	-5.45537	-3.00573	28/623	596,857,4301,4736,4905,5174,5727,6125,6129,6133,6189,6222,6229,6230,7074,7485,8500,9631,9847,10268,23204,23426,26088,55690,57217,60412,116372,117177,2033,4927,51386,55706,64710,677,1615,1933,1964,3488,5935,7057,7298,10658,23107,54517,55037,55157,56919,64432,79731,85451,123283,1434,1894,4137,9679,23514,27092,83943,143187,1676,3146,3148,5209,5695,7374,9238,27044,138199,6715	BCL2,CAV1,AFDN,RPL10A,NSF,PDZK1,PTCH1,RPL5,RPL7,RPL9,RPS3A,RPS18,RPS24,RPS25,TIAM1,GET1,PPFIA1,NUP155,C2CD5,RAMP3,ARL6IP1,GRIP1,GGA1,PACS1,TTC7A,EXOC4,LYPD1,RAB3IP,EP300,NUP88,EIF3L,NDC1,NUCKS1,ZFP36L1,DARS1,EEF1B2,EIF1AX,IGFBP5,RBM3,THBS1,TYMS,CELF1,MRPS27,PUS7,PTCD3,DARS2,DHX33,MRPS25,NARS2,UNK,TARSL2,CSE1L,ECT2,MAPT,FAM53B,SPIDR,CACNG4,IMMP2L,VTI1A,DFFA,HMGB1,HMGB2,PFKFB3,PSMB7,UNG,TBRG4,SND1,…
14_Member	GO Biological Processes	GO:0072657	protein localization to membrane	-5.45537	-3.00573	28/623	596,857,4301,4736,4905,5174,5727,6125,6129,6133,6189,6222,6229,6230,7074,7485,8500,9631,9847,10268,23204,23426,26088,55690,57217,60412,116372,117177	BCL2,CAV1,AFDN,RPL10A,NSF,PDZK1,PTCH1,RPL5,RPL7,RPL9,RPS3A,RPS18,RPS24,RPS25,TIAM1,GET1,PPFIA1,NUP155,C2CD5,RAMP3,ARL6IP1,GRIP1,GGA1,PACS1,TTC7A,EXOC4,LYPD1,RAB3IP
14_Member	GO Biological Processes	GO:0090150	establishment of protein localization to membrane	-5.27983	-2.88543	19/334	596,4301,4736,4905,5174,6125,6129,6133,6189,6222,6229,6230,7485,9847,23204,23426,26088,60412,117177	BCL2,AFDN,RPL10A,NSF,PDZK1,RPL5,RPL7,RPL9,RPS3A,RPS18,RPS24,RPS25,GET1,C2CD5,ARL6IP1,GRIP1,GGA1,EXOC4,RAB3IP
14_Member	GO Biological Processes	GO:0019080	viral gene expression	-5.26668	-2.88313	14/191	2033,4736,4927,6125,6129,6133,6189,6222,6229,6230,9631,51386,55706,64710	EP300,RPL10A,NUP88,RPL5,RPL7,RPL9,RPS3A,RPS18,RPS24,RPS25,NUP155,EIF3L,NDC1,NUCKS1
14_Member	GO Biological Processes	GO:0019083	viral transcription	-4.94189	-2.61637	13/177	2033,4736,4927,6125,6129,6133,6189,6222,6229,6230,9631,55706,64710	EP300,RPL10A,NUP88,RPL5,RPL7,RPL9,RPS3A,RPS18,RPS24,RPS25,NUP155,NDC1,NUCKS1
14_Member	GO Biological Processes	GO:0006612	protein targeting to membrane	-4.33698	-2.09545	13/202	4736,5174,6125,6129,6133,6189,6222,6229,6230,9847,23204,60412,117177	RPL10A,PDZK1,RPL5,RPL7,RPL9,RPS3A,RPS18,RPS24,RPS25,C2CD5,ARL6IP1,EXOC4,RAB3IP
14_Member	GO Biological Processes	GO:0006613	cotranslational protein targeting to membrane	-3.98183	-1.82657	9/109	4736,6125,6129,6133,6189,6222,6229,6230,23204	RPL10A,RPL5,RPL7,RPL9,RPS3A,RPS18,RPS24,RPS25,ARL6IP1
14_Member	GO Biological Processes	GO:0006412	translation	-3.96913	-1.81777	27/715	677,1615,1933,1964,3488,4736,5935,6125,6129,6133,6189,6222,6229,6230,7057,7298,10658,23107,51386,54517,55037,55157,56919,64432,79731,85451,123283	ZFP36L1,DARS1,EEF1B2,EIF1AX,IGFBP5,RPL10A,RBM3,RPL5,RPL7,RPL9,RPS3A,RPS18,RPS24,RPS25,THBS1,TYMS,CELF1,MRPS27,EIF3L,PUS7,PTCD3,DARS2,DHX33,MRPS25,NARS2,UNK,TARSL2
14_Member	GO Biological Processes	GO:0043043	peptide biosynthetic process	-3.72764	-1.64763	27/740	677,1615,1933,1964,3488,4736,5935,6125,6129,6133,6189,6222,6229,6230,7057,7298,10658,23107,51386,54517,55037,55157,56919,64432,79731,85451,123283	ZFP36L1,DARS1,EEF1B2,EIF1AX,IGFBP5,RPL10A,RBM3,RPL5,RPL7,RPL9,RPS3A,RPS18,RPS24,RPS25,THBS1,TYMS,CELF1,MRPS27,EIF3L,PUS7,PTCD3,DARS2,DHX33,MRPS25,NARS2,UNK,TARSL2
14_Member	GO Biological Processes	GO:0006614	SRP-dependent cotranslational protein targeting to membrane	-3.3618	-1.3787	8/105	4736,6125,6129,6133,6189,6222,6229,6230	RPL10A,RPL5,RPL7,RPL9,RPS3A,RPS18,RPS24,RPS25
14_Member	GO Biological Processes	GO:0006413	translational initiation	-3.30468	-1.32891	11/193	1964,4736,6125,6129,6133,6189,6222,6229,6230,51386,56919	EIF1AX,RPL10A,RPL5,RPL7,RPL9,RPS3A,RPS18,RPS24,RPS25,EIF3L,DHX33
14_Member	GO Biological Processes	GO:0045047	protein targeting to ER	-3.02571	-1.1218	8/118	4736,6125,6129,6133,6189,6222,6229,6230	RPL10A,RPL5,RPL7,RPL9,RPS3A,RPS18,RPS24,RPS25
14_Member	GO Biological Processes	GO:0000184	nuclear-transcribed mRNA catabolic process, nonsense-mediated decay	-2.97825	-1.09076	8/120	4736,6125,6129,6133,6189,6222,6229,6230	RPL10A,RPL5,RPL7,RPL9,RPS3A,RPS18,RPS24,RPS25
14_Member	GO Biological Processes	GO:0072599	establishment of protein localization to endoplasmic reticulum	-2.9318	-1.05756	8/122	4736,6125,6129,6133,6189,6222,6229,6230	RPL10A,RPL5,RPL7,RPL9,RPS3A,RPS18,RPS24,RPS25
14_Member	GO Biological Processes	GO:0072594	establishment of protein localization to organelle	-2.53047	-0.787777	19/549	596,1434,1894,4137,4736,4927,6125,6129,6133,6189,6222,6229,6230,9631,9679,23514,27092,83943,143187	BCL2,CSE1L,ECT2,MAPT,RPL10A,NUP88,RPL5,RPL7,RPL9,RPS3A,RPS18,RPS24,RPS25,NUP155,FAM53B,SPIDR,CACNG4,IMMP2L,VTI1A
14_Member	GO Biological Processes	GO:0070972	protein localization to endoplasmic reticulum	-2.42499	-0.71717	8/147	4736,6125,6129,6133,6189,6222,6229,6230	RPL10A,RPL5,RPL7,RPL9,RPS3A,RPS18,RPS24,RPS25
14_Member	GO Biological Processes	GO:0006605	protein targeting	-2.12095	-0.509088	15/432	4736,5174,6125,6129,6133,6189,6222,6229,6230,9847,23204,60412,83943,117177,143187	RPL10A,PDZK1,RPL5,RPL7,RPL9,RPS3A,RPS18,RPS24,RPS25,C2CD5,ARL6IP1,EXOC4,IMMP2L,RAB3IP,VTI1A
14_Member	GO Biological Processes	GO:0034655	nucleobase-containing compound catabolic process	-2.06526	-0.479583	20/652	677,1676,3146,3148,4736,4927,5209,5695,6125,6129,6133,6189,6222,6229,6230,7374,9238,9631,27044,55706	ZFP36L1,DFFA,HMGB1,HMGB2,RPL10A,NUP88,PFKFB3,PSMB7,RPL5,RPL7,RPL9,RPS3A,RPS18,RPS24,RPS25,UNG,TBRG4,NUP155,SND1,NDC1
14_Member	GO Biological Processes	GO:0046700	heterocycle catabolic process	-2.00703	-0.445673	21/705	677,1676,3146,3148,4736,4927,5209,5695,6125,6129,6133,6189,6222,6229,6230,7374,9238,9631,27044,55706,138199	ZFP36L1,DFFA,HMGB1,HMGB2,RPL10A,NUP88,PFKFB3,PSMB7,RPL5,RPL7,RPL9,RPS3A,RPS18,RPS24,RPS25,UNG,TBRG4,NUP155,SND1,NDC1,CARNMT1
14_Member	GO Biological Processes	GO:0000956	nuclear-transcribed mRNA catabolic process	-2.00676	-0.445673	9/209	677,4736,6125,6129,6133,6189,6222,6229,6230	ZFP36L1,RPL10A,RPL5,RPL7,RPL9,RPS3A,RPS18,RPS24,RPS25
14_Member	GO Biological Processes	GO:0044270	cellular nitrogen compound catabolic process	-2.00059	-0.441483	21/706	677,1676,3146,3148,4736,4927,5209,5695,6125,6129,6133,6189,6222,6229,6230,7374,9238,9631,27044,55706,138199	ZFP36L1,DFFA,HMGB1,HMGB2,RPL10A,NUP88,PFKFB3,PSMB7,RPL5,RPL7,RPL9,RPS3A,RPS18,RPS24,RPS25,UNG,TBRG4,NUP155,SND1,NDC1,CARNMT1
14_Member	GO Biological Processes	GO:1901361	organic cyclic compound catabolic process	-1.97469	-0.430927	22/755	677,1676,3146,3148,4736,4927,5209,5695,6125,6129,6133,6189,6222,6229,6230,6715,7374,9238,9631,27044,55706,138199	ZFP36L1,DFFA,HMGB1,HMGB2,RPL10A,NUP88,PFKFB3,PSMB7,RPL5,RPL7,RPL9,RPS3A,RPS18,RPS24,RPS25,SRD5A1,UNG,TBRG4,NUP155,SND1,NDC1,CARNMT1
14_Member	GO Biological Processes	GO:0019439	aromatic compound catabolic process	-1.93085	-0.407515	21/717	677,1676,3146,3148,4736,4927,5209,5695,6125,6129,6133,6189,6222,6229,6230,7374,9238,9631,27044,55706,138199	ZFP36L1,DFFA,HMGB1,HMGB2,RPL10A,NUP88,PFKFB3,PSMB7,RPL5,RPL7,RPL9,RPS3A,RPS18,RPS24,RPS25,UNG,TBRG4,NUP155,SND1,NDC1,CARNMT1
14_Member	GO Biological Processes	GO:0006401	RNA catabolic process	-1.37423	-0.0564474	12/400	677,4736,5695,6125,6129,6133,6189,6222,6229,6230,9238,27044	ZFP36L1,RPL10A,PSMB7,RPL5,RPL7,RPL9,RPS3A,RPS18,RPS24,RPS25,TBRG4,SND1
15_Summary	GO Biological Processes	GO:0090068	positive regulation of cell cycle process	-5.39144	-2.97573	18/298	891,1894,2033,4085,5890,6790,9493,9787,9928,23236,27085,29127,29899,51203,55835,81610,144455,348654,3955,150465	CCNB1,ECT2,EP300,MAD2L1,RAD51B,AURKA,KIF23,DLGAP5,KIF14,PLCB1,MTBP,RACGAP1,GPSM2,NUSAP1,CENPJ,FAM83D,E2F7,GEN1,LFNG,TTL
15_Member	GO Biological Processes	GO:0090068	positive regulation of cell cycle process	-5.39144	-2.97573	18/298	891,1894,2033,4085,5890,6790,9493,9787,9928,23236,27085,29127,29899,51203,55835,81610,144455,348654	CCNB1,ECT2,EP300,MAD2L1,RAD51B,AURKA,KIF23,DLGAP5,KIF14,PLCB1,MTBP,RACGAP1,GPSM2,NUSAP1,CENPJ,FAM83D,E2F7,GEN1
15_Member	GO Biological Processes	GO:0045787	positive regulation of cell cycle	-4.87694	-2.55718	20/389	891,1894,2033,3955,4085,5890,6790,9493,9787,9928,23236,27085,29127,29899,51203,55835,81610,144455,150465,348654	CCNB1,ECT2,EP300,LFNG,MAD2L1,RAD51B,AURKA,KIF23,DLGAP5,KIF14,PLCB1,MTBP,RACGAP1,GPSM2,NUSAP1,CENPJ,FAM83D,E2F7,TTL,GEN1
15_Member	GO Biological Processes	GO:0045931	positive regulation of mitotic cell cycle	-3.3016	-1.32891	10/163	891,4085,5890,6790,9787,23236,27085,51203,150465,348654	CCNB1,MAD2L1,RAD51B,AURKA,DLGAP5,PLCB1,MTBP,NUSAP1,TTL,GEN1
15_Member	GO Biological Processes	GO:1901989	positive regulation of cell cycle phase transition	-2.01817	-0.454081	6/106	891,5890,9787,23236,27085,81610	CCNB1,RAD51B,DLGAP5,PLCB1,MTBP,FAM83D
15_Member	GO Biological Processes	GO:1901992	positive regulation of mitotic cell cycle phase transition	-1.70654	-0.271896	5/91	891,5890,9787,23236,27085	CCNB1,RAD51B,DLGAP5,PLCB1,MTBP
15_Member	GO Biological Processes	GO:0051785	positive regulation of nuclear division	-1.58422	-0.198342	4/66	6790,9787,23236,51203	AURKA,DLGAP5,PLCB1,NUSAP1
16_Summary	GO Biological Processes	GO:0048589	developmental growth	-5.26416	-2.88313	29/674	596,607,677,891,1627,2033,2261,3720,4137,4851,5292,5361,5727,5738,6387,6506,6790,7074,7298,7337,9215,10439,23236,54892,57493,80014,91584,150465,259266,1063,3488,57486,94104,488	BCL2,BCL9,ZFP36L1,CCNB1,DBN1,EP300,FGFR3,JARID2,MAPT,NOTCH1,PIM1,PLXNA1,PTCH1,PTGFRN,CXCL12,SLC1A2,AURKA,TIAM1,TYMS,UBE3A,LARGE1,OLFM1,PLCB1,NCAPG2,HEG1,WWC2,PLXNA4,TTL,ASPM,CENPF,IGFBP5,NLN,PAXBP1,ATP2A2
16_Member	GO Biological Processes	GO:0048589	developmental growth	-5.26416	-2.88313	29/674	596,607,677,891,1627,2033,2261,3720,4137,4851,5292,5361,5727,5738,6387,6506,6790,7074,7298,7337,9215,10439,23236,54892,57493,80014,91584,150465,259266	BCL2,BCL9,ZFP36L1,CCNB1,DBN1,EP300,FGFR3,JARID2,MAPT,NOTCH1,PIM1,PLXNA1,PTCH1,PTGFRN,CXCL12,SLC1A2,AURKA,TIAM1,TYMS,UBE3A,LARGE1,OLFM1,PLCB1,NCAPG2,HEG1,WWC2,PLXNA4,TTL,ASPM
16_Member	GO Biological Processes	GO:0048638	regulation of developmental growth	-3.01355	-1.11295	15/347	596,891,1627,2261,3720,4137,4851,5292,5727,6387,10439,23236,80014,91584,150465	BCL2,CCNB1,DBN1,FGFR3,JARID2,MAPT,NOTCH1,PIM1,PTCH1,CXCL12,OLFM1,PLCB1,WWC2,PLXNA4,TTL
16_Member	GO Biological Processes	GO:1901861	regulation of muscle tissue development	-2.28696	-0.624229	8/155	596,891,1063,3488,3720,4851,5292,57486	BCL2,CCNB1,CENPF,IGFBP5,JARID2,NOTCH1,PIM1,NLN
16_Member	GO Biological Processes	GO:0035265	organ growth	-2.07155	-0.481637	9/204	596,891,2261,3720,4851,5292,7337,57493,80014	BCL2,CCNB1,FGFR3,JARID2,NOTCH1,PIM1,UBE3A,HEG1,WWC2
16_Member	GO Biological Processes	GO:0014855	striated muscle cell proliferation	-1.90625	-0.392312	5/81	891,3720,4851,5292,94104	CCNB1,JARID2,NOTCH1,PIM1,PAXBP1
16_Member	GO Biological Processes	GO:0048639	positive regulation of developmental growth	-1.86058	-0.367403	8/184	596,891,1627,4137,4851,5292,6387,23236	BCL2,CCNB1,DBN1,MAPT,NOTCH1,PIM1,CXCL12,PLCB1
16_Member	GO Biological Processes	GO:0016202	regulation of striated muscle tissue development	-1.80946	-0.330694	7/152	596,891,1063,3720,4851,5292,57486	BCL2,CCNB1,CENPF,JARID2,NOTCH1,PIM1,NLN
16_Member	GO Biological Processes	GO:0060043	regulation of cardiac muscle cell proliferation	-1.79411	-0.321885	4/57	891,3720,4851,5292	CCNB1,JARID2,NOTCH1,PIM1
16_Member	GO Biological Processes	GO:0048634	regulation of muscle organ development	-1.75357	-0.296506	7/156	596,891,1063,3720,4851,5292,57486	BCL2,CCNB1,CENPF,JARID2,NOTCH1,PIM1,NLN
16_Member	GO Biological Processes	GO:0060045	positive regulation of cardiac muscle cell proliferation	-1.57548	-0.196412	3/38	891,4851,5292	CCNB1,NOTCH1,PIM1
16_Member	GO Biological Processes	GO:0060038	cardiac muscle cell proliferation	-1.56316	-0.185409	4/67	891,3720,4851,5292	CCNB1,JARID2,NOTCH1,PIM1
16_Member	GO Biological Processes	GO:0014741	negative regulation of muscle hypertrophy	-1.54608	-0.174165	3/39	3488,3720,4851	IGFBP5,JARID2,NOTCH1
16_Member	GO Biological Processes	GO:0055017	cardiac muscle tissue growth	-1.47158	-0.119188	5/105	891,3720,4851,5292,57493	CCNB1,JARID2,NOTCH1,PIM1,HEG1
16_Member	GO Biological Processes	GO:0014897	striated muscle hypertrophy	-1.41224	-0.0833077	5/109	488,3488,3720,4851,7074	ATP2A2,IGFBP5,JARID2,NOTCH1,TIAM1
16_Member	GO Biological Processes	GO:0014896	muscle hypertrophy	-1.38371	-0.0645184	5/111	488,3488,3720,4851,7074	ATP2A2,IGFBP5,JARID2,NOTCH1,TIAM1
16_Member	GO Biological Processes	GO:0060419	heart growth	-1.36972	-0.0550654	5/112	891,3720,4851,5292,57493	CCNB1,JARID2,NOTCH1,PIM1,HEG1
16_Member	GO Biological Processes	GO:0046620	regulation of organ growth	-1.3559	-0.049906	5/113	891,3720,4851,5292,80014	CCNB1,JARID2,NOTCH1,PIM1,WWC2
16_Member	GO Biological Processes	GO:0055021	regulation of cardiac muscle tissue growth	-1.35561	-0.049906	4/78	891,3720,4851,5292	CCNB1,JARID2,NOTCH1,PIM1
16_Member	GO Biological Processes	GO:0055023	positive regulation of cardiac muscle tissue growth	-1.31712	-0.0266361	3/48	891,4851,5292	CCNB1,NOTCH1,PIM1
17_Summary	GO Biological Processes	GO:0045786	negative regulation of cell cycle	-5.21048	-2.84216	28/642	580,596,641,655,677,891,1033,1063,2033,4085,4609,4751,4851,5695,5774,5796,6498,6790,7057,7153,9238,9319,23468,27085,55771,144455,220042,348654,857,890,50809,6387	BARD1,BCL2,BLM,BMP7,ZFP36L1,CCNB1,CDKN3,CENPF,EP300,MAD2L1,MYC,NEK2,NOTCH1,PSMB7,PTPN3,PTPRK,SKIL,AURKA,THBS1,TOP2A,TBRG4,TRIP13,CBX5,MTBP,PRR11,E2F7,DDIAS,GEN1,CAV1,CCNA2,HP1BP3,CXCL12
17_Member	GO Biological Processes	GO:0045786	negative regulation of cell cycle	-5.21048	-2.84216	28/642	580,596,641,655,677,891,1033,1063,2033,4085,4609,4751,4851,5695,5774,5796,6498,6790,7057,7153,9238,9319,23468,27085,55771,144455,220042,348654	BARD1,BCL2,BLM,BMP7,ZFP36L1,CCNB1,CDKN3,CENPF,EP300,MAD2L1,MYC,NEK2,NOTCH1,PSMB7,PTPN3,PTPRK,SKIL,AURKA,THBS1,TOP2A,TBRG4,TRIP13,CBX5,MTBP,PRR11,E2F7,DDIAS,GEN1
17_Member	GO Biological Processes	GO:0007050	cell cycle arrest	-4.19917	-1.97172	14/238	580,891,1033,2033,4609,4851,6498,6790,7057,9238,27085,55771,144455,220042	BARD1,CCNB1,CDKN3,EP300,MYC,NOTCH1,SKIL,AURKA,THBS1,TBRG4,MTBP,PRR11,E2F7,DDIAS
17_Member	GO Biological Processes	GO:0071453	cellular response to oxygen levels	-2.62905	-0.86144	11/234	596,655,677,857,890,891,2033,4609,4851,5695,50809	BCL2,BMP7,ZFP36L1,CAV1,CCNA2,CCNB1,EP300,MYC,NOTCH1,PSMB7,HP1BP3
17_Member	GO Biological Processes	GO:0071456	cellular response to hypoxia	-2.52194	-0.780753	10/207	596,655,677,890,891,2033,4609,4851,5695,50809	BCL2,BMP7,ZFP36L1,CCNA2,CCNB1,EP300,MYC,NOTCH1,PSMB7,HP1BP3
17_Member	GO Biological Processes	GO:0036294	cellular response to decreased oxygen levels	-2.37695	-0.680759	10/217	596,655,677,890,891,2033,4609,4851,5695,50809	BCL2,BMP7,ZFP36L1,CCNA2,CCNB1,EP300,MYC,NOTCH1,PSMB7,HP1BP3
17_Member	GO Biological Processes	GO:0001666	response to hypoxia	-2.04695	-0.468589	13/359	596,655,677,857,890,891,2033,4609,4851,5695,6387,7057,50809	BCL2,BMP7,ZFP36L1,CAV1,CCNA2,CCNB1,EP300,MYC,NOTCH1,PSMB7,CXCL12,THBS1,HP1BP3
17_Member	GO Biological Processes	GO:0036293	response to decreased oxygen levels	-1.94533	-0.414074	13/370	596,655,677,857,890,891,2033,4609,4851,5695,6387,7057,50809	BCL2,BMP7,ZFP36L1,CAV1,CCNA2,CCNB1,EP300,MYC,NOTCH1,PSMB7,CXCL12,THBS1,HP1BP3
17_Member	GO Biological Processes	GO:0070482	response to oxygen levels	-1.74075	-0.292894	13/394	596,655,677,857,890,891,2033,4609,4851,5695,6387,7057,50809	BCL2,BMP7,ZFP36L1,CAV1,CCNA2,CCNB1,EP300,MYC,NOTCH1,PSMB7,CXCL12,THBS1,HP1BP3
18_Summary	GO Biological Processes	GO:0051782	negative regulation of cell division	-5.00285	-2.6715	5/18	641,4609,5727,144455,259266,655,596,760,1063,4774,4851,5979,6715,7337,10272,55165,55959,79191,1289,2885,3488,3714,3909,4233,4522,5361,5695,7074,9645,26005,4638,57493,60412,10806,677,2321,25861,79583,9678	BLM,MYC,PTCH1,E2F7,ASPM,BMP7,BCL2,CA2,CENPF,NFIA,NOTCH1,RET,SRD5A1,UBE3A,FSTL3,CEP55,SULF2,IRX3,COL5A1,GRB2,IGFBP5,JAG2,LAMA3,MET,MTHFD1,PLXNA1,PSMB7,TIAM1,MICAL2,C2CD3,MYLK,HEG1,EXOC4,SDCCAG8,ZFP36L1,FLT1,WHRN,TMEM231,PHF14
18_Member	GO Biological Processes	GO:0051782	negative regulation of cell division	-5.00285	-2.6715	5/18	641,4609,5727,144455,259266	BLM,MYC,PTCH1,E2F7,ASPM
18_Member	GO Biological Processes	GO:0072203	cell proliferation involved in metanephros development	-3.2701	-1.30757	3/10	655,4609,5727	BMP7,MYC,PTCH1
18_Member	GO Biological Processes	GO:0001655	urogenital system development	-3.22151	-1.28575	15/331	596,655,760,1063,4609,4774,4851,5727,5979,6715,7337,10272,55165,55959,79191	BCL2,BMP7,CA2,CENPF,MYC,NFIA,NOTCH1,PTCH1,RET,SRD5A1,UBE3A,FSTL3,CEP55,SULF2,IRX3
18_Member	GO Biological Processes	GO:0002009	morphogenesis of an epithelium	-2.98117	-1.09076	20/540	596,655,760,1289,2885,3488,3714,3909,4233,4522,4609,4851,5361,5695,5727,5979,7074,9645,26005,79191	BCL2,BMP7,CA2,COL5A1,GRB2,IGFBP5,JAG2,LAMA3,MET,MTHFD1,MYC,NOTCH1,PLXNA1,PSMB7,PTCH1,RET,TIAM1,MICAL2,C2CD3,IRX3
18_Member	GO Biological Processes	GO:0048729	tissue morphogenesis	-2.86993	-1.02154	23/674	596,655,760,1289,2885,3488,3714,3909,4233,4522,4609,4638,4851,5361,5695,5727,5979,7074,9645,26005,57493,60412,79191	BCL2,BMP7,CA2,COL5A1,GRB2,IGFBP5,JAG2,LAMA3,MET,MTHFD1,MYC,MYLK,NOTCH1,PLXNA1,PSMB7,PTCH1,RET,TIAM1,MICAL2,C2CD3,HEG1,EXOC4,IRX3
18_Member	GO Biological Processes	GO:0072001	renal system development	-2.77071	-0.95034	13/294	596,655,760,1063,4609,4774,4851,5727,5979,10272,55165,55959,79191	BCL2,BMP7,CA2,CENPF,MYC,NFIA,NOTCH1,PTCH1,RET,FSTL3,CEP55,SULF2,IRX3
18_Member	GO Biological Processes	GO:0072006	nephron development	-2.49794	-0.768657	8/143	596,655,4609,4851,5727,5979,55959,79191	BCL2,BMP7,MYC,NOTCH1,PTCH1,RET,SULF2,IRX3
18_Member	GO Biological Processes	GO:0001656	metanephros development	-2.35817	-0.674792	6/90	596,655,4609,5727,5979,79191	BCL2,BMP7,MYC,PTCH1,RET,IRX3
18_Member	GO Biological Processes	GO:0072111	cell proliferation involved in kidney development	-2.22751	-0.583012	3/22	655,4609,5727	BMP7,MYC,PTCH1
18_Member	GO Biological Processes	GO:0001822	kidney development	-2.06311	-0.478481	11/279	596,655,760,1063,4609,4851,5727,5979,10272,55959,79191	BCL2,BMP7,CA2,CENPF,MYC,NOTCH1,PTCH1,RET,FSTL3,SULF2,IRX3
18_Member	GO Biological Processes	GO:0072073	kidney epithelium development	-1.99059	-0.437094	7/140	596,655,4609,4851,5727,5979,79191	BCL2,BMP7,MYC,NOTCH1,PTCH1,RET,IRX3
18_Member	GO Biological Processes	GO:0072028	nephron morphogenesis	-1.97254	-0.430927	5/78	596,655,4609,5727,79191	BCL2,BMP7,MYC,PTCH1,IRX3
18_Member	GO Biological Processes	GO:0061138	morphogenesis of a branching epithelium	-1.88677	-0.382549	8/182	596,655,2885,4233,4609,4851,5361,5727	BCL2,BMP7,GRB2,MET,MYC,NOTCH1,PLXNA1,PTCH1
18_Member	GO Biological Processes	GO:0035148	tube formation	-1.86751	-0.370222	7/148	655,4522,4851,5727,5979,10806,79191	BMP7,MTHFD1,NOTCH1,PTCH1,RET,SDCCAG8,IRX3
18_Member	GO Biological Processes	GO:0001763	morphogenesis of a branching structure	-1.71191	-0.272514	8/196	596,655,2885,4233,4609,4851,5361,5727	BCL2,BMP7,GRB2,MET,MYC,NOTCH1,PLXNA1,PTCH1
18_Member	GO Biological Processes	GO:0072080	nephron tubule development	-1.67007	-0.250745	5/93	596,4609,4851,5727,79191	BCL2,MYC,NOTCH1,PTCH1,IRX3
18_Member	GO Biological Processes	GO:0060562	epithelial tube morphogenesis	-1.64292	-0.23122	11/322	596,655,4233,4522,4609,4851,5727,5979,9645,26005,79191	BCL2,BMP7,MET,MTHFD1,MYC,NOTCH1,PTCH1,RET,MICAL2,C2CD3,IRX3
18_Member	GO Biological Processes	GO:0060993	kidney morphogenesis	-1.63464	-0.229247	5/95	596,655,4609,5727,79191	BCL2,BMP7,MYC,PTCH1,IRX3
18_Member	GO Biological Processes	GO:0061326	renal tubule development	-1.63464	-0.229247	5/95	596,4609,4851,5727,79191	BCL2,MYC,NOTCH1,PTCH1,IRX3
18_Member	GO Biological Processes	GO:0048598	embryonic morphogenesis	-1.62331	-0.222762	17/586	655,677,1289,2321,2885,3714,3909,4522,4851,5727,5979,9645,25861,26005,60412,79191,79583	BMP7,ZFP36L1,COL5A1,FLT1,GRB2,JAG2,LAMA3,MTHFD1,NOTCH1,PTCH1,RET,MICAL2,WHRN,C2CD3,EXOC4,IRX3,TMEM231
18_Member	GO Biological Processes	GO:0001657	ureteric bud development	-1.6002	-0.211199	5/97	596,655,4609,5727,5979	BCL2,BMP7,MYC,PTCH1,RET
18_Member	GO Biological Processes	GO:0072163	mesonephric epithelium development	-1.58334	-0.198342	5/98	596,655,4609,5727,5979	BCL2,BMP7,MYC,PTCH1,RET
18_Member	GO Biological Processes	GO:0072164	mesonephric tubule development	-1.58334	-0.198342	5/98	596,655,4609,5727,5979	BCL2,BMP7,MYC,PTCH1,RET
18_Member	GO Biological Processes	GO:0001823	mesonephros development	-1.51818	-0.152701	5/102	596,655,4609,5727,5979	BCL2,BMP7,MYC,PTCH1,RET
18_Member	GO Biological Processes	GO:0072078	nephron tubule morphogenesis	-1.42637	-0.0897061	4/74	596,4609,5727,79191	BCL2,MYC,PTCH1,IRX3
18_Member	GO Biological Processes	GO:0072009	nephron epithelium development	-1.41224	-0.0833077	5/109	596,4609,4851,5727,79191	BCL2,MYC,NOTCH1,PTCH1,IRX3
18_Member	GO Biological Processes	GO:0010463	mesenchymal cell proliferation	-1.41173	-0.0833077	3/44	655,4609,9678	BMP7,MYC,PHF14
18_Member	GO Biological Processes	GO:0072088	nephron epithelium morphogenesis	-1.39037	-0.0688002	4/76	596,4609,5727,79191	BCL2,MYC,PTCH1,IRX3
18_Member	GO Biological Processes	GO:0016331	morphogenesis of embryonic epithelium	-1.36049	-0.05201	6/150	655,3714,4522,5727,5979,79191	BMP7,JAG2,MTHFD1,PTCH1,RET,IRX3
18_Member	GO Biological Processes	GO:0048754	branching morphogenesis of an epithelial tube	-1.36049	-0.05201	6/150	596,655,4233,4609,4851,5727	BCL2,BMP7,MET,MYC,NOTCH1,PTCH1
18_Member	GO Biological Processes	GO:0061333	renal tubule morphogenesis	-1.35561	-0.049906	4/78	596,4609,5727,79191	BCL2,MYC,PTCH1,IRX3
19_Summary	GO Biological Processes	GO:0044843	cell cycle G1/S phase transition	-4.80157	-2.49309	17/298	596,890,891,1033,2033,4173,4176,4609,5422,6502,6790,7298,9928,23236,27085,81610,144455,7153,9319,10388,2261,5979,64131,116151,580,641,5983,5985,6125,9156,51741,83943,259266,4774,55638,4085,5695	BCL2,CCNA2,CCNB1,CDKN3,EP300,MCM4,MCM7,MYC,POLA1,SKP2,AURKA,TYMS,KIF14,PLCB1,MTBP,FAM83D,E2F7,TOP2A,TRIP13,SYCP2,FGFR3,RET,XYLT1,FAM210B,BARD1,BLM,RFC3,RFC5,RPL5,EXO1,WWOX,IMMP2L,ASPM,NFIA,SYBU,MAD2L1,PSMB7
19_Member	GO Biological Processes	GO:0044843	cell cycle G1/S phase transition	-4.80157	-2.49309	17/298	596,890,891,1033,2033,4173,4176,4609,5422,6502,6790,7298,9928,23236,27085,81610,144455	BCL2,CCNA2,CCNB1,CDKN3,EP300,MCM4,MCM7,MYC,POLA1,SKP2,AURKA,TYMS,KIF14,PLCB1,MTBP,FAM83D,E2F7
19_Member	GO Biological Processes	GO:0000082	G1/S transition of mitotic cell cycle	-4.01572	-1.84857	15/279	596,891,1033,2033,4173,4176,4609,5422,6502,6790,7298,9928,23236,27085,144455	BCL2,CCNB1,CDKN3,EP300,MCM4,MCM7,MYC,POLA1,SKP2,AURKA,TYMS,KIF14,PLCB1,MTBP,E2F7
19_Member	GO Biological Processes	GO:0007143	female meiotic nuclear division	-2.7431	-0.924541	4/31	6790,7153,9319,10388	AURKA,TOP2A,TRIP13,SYCP2
19_Member	GO Biological Processes	GO:0071695	anatomical structure maturation	-2.67083	-0.881875	9/165	596,891,2261,5979,6790,7298,9319,64131,116151	BCL2,CCNB1,FGFR3,RET,AURKA,TYMS,TRIP13,XYLT1,FAM210B
19_Member	GO Biological Processes	GO:0072331	signal transduction by p53 class mediator	-2.64354	-0.866132	12/268	580,596,641,891,2033,5983,5985,6125,6790,9156,51741,144455	BARD1,BCL2,BLM,CCNB1,EP300,RFC3,RFC5,RPL5,AURKA,EXO1,WWOX,E2F7
19_Member	GO Biological Processes	GO:0007292	female gamete generation	-2.63254	-0.861717	8/136	596,891,6790,7153,9319,10388,83943,259266	BCL2,CCNB1,AURKA,TOP2A,TRIP13,SYCP2,IMMP2L,ASPM
19_Member	GO Biological Processes	GO:0021700	developmental maturation	-2.43954	-0.728918	12/284	596,891,2261,4774,5979,6790,7298,9319,9928,55638,64131,116151	BCL2,CCNB1,FGFR3,NFIA,RET,AURKA,TYMS,TRIP13,KIF14,SYBU,XYLT1,FAM210B
19_Member	GO Biological Processes	GO:1901796	regulation of signal transduction by p53 class mediator	-2.41847	-0.714826	9/180	580,596,641,2033,5983,5985,6125,6790,9156	BARD1,BCL2,BLM,EP300,RFC3,RFC5,RPL5,AURKA,EXO1
19_Member	GO Biological Processes	GO:0048599	oocyte development	-2.11496	-0.507109	4/46	596,891,6790,9319	BCL2,CCNB1,AURKA,TRIP13
19_Member	GO Biological Processes	GO:1902806	regulation of cell cycle G1/S phase transition	-2.09814	-0.492055	9/202	596,891,2033,6790,9928,23236,27085,81610,144455	BCL2,CCNB1,EP300,AURKA,KIF14,PLCB1,MTBP,FAM83D,E2F7
19_Member	GO Biological Processes	GO:0001556	oocyte maturation	-2.02182	-0.454081	3/26	891,6790,9319	CCNB1,AURKA,TRIP13
19_Member	GO Biological Processes	GO:0044774	mitotic DNA integrity checkpoint	-2.01817	-0.454081	6/106	641,891,2033,6790,7153,144455	BLM,CCNB1,EP300,AURKA,TOP2A,E2F7
19_Member	GO Biological Processes	GO:0009994	oocyte differentiation	-1.9586	-0.41889	4/51	596,891,6790,9319	BCL2,CCNB1,AURKA,TRIP13
19_Member	GO Biological Processes	GO:0048469	cell maturation	-1.95416	-0.41728	8/177	596,891,5979,6790,7298,9319,9928,116151	BCL2,CCNB1,RET,AURKA,TYMS,TRIP13,KIF14,FAM210B
19_Member	GO Biological Processes	GO:2000045	regulation of G1/S transition of mitotic cell cycle	-1.86058	-0.367403	8/184	596,891,2033,6790,9928,23236,27085,144455	BCL2,CCNB1,EP300,AURKA,KIF14,PLCB1,MTBP,E2F7
19_Member	GO Biological Processes	GO:0006977	DNA damage response, signal transduction by p53 class mediator resulting in cell cycle arrest	-1.81999	-0.336253	4/56	891,2033,6790,144455	CCNB1,EP300,AURKA,E2F7
19_Member	GO Biological Processes	GO:0072431	signal transduction involved in mitotic G1 DNA damage checkpoint	-1.79411	-0.321885	4/57	891,2033,6790,144455	CCNB1,EP300,AURKA,E2F7
19_Member	GO Biological Processes	GO:1902400	intracellular signal transduction involved in G1 DNA damage checkpoint	-1.79411	-0.321885	4/57	891,2033,6790,144455	CCNB1,EP300,AURKA,E2F7
19_Member	GO Biological Processes	GO:0048477	oogenesis	-1.78279	-0.313799	5/87	596,891,6790,9319,259266	BCL2,CCNB1,AURKA,TRIP13,ASPM
19_Member	GO Biological Processes	GO:0072413	signal transduction involved in mitotic cell cycle checkpoint	-1.744	-0.294707	4/59	891,2033,6790,144455	CCNB1,EP300,AURKA,E2F7
19_Member	GO Biological Processes	GO:1902402	signal transduction involved in mitotic DNA damage checkpoint	-1.744	-0.294707	4/59	891,2033,6790,144455	CCNB1,EP300,AURKA,E2F7
19_Member	GO Biological Processes	GO:1902403	signal transduction involved in mitotic DNA integrity checkpoint	-1.744	-0.294707	4/59	891,2033,6790,144455	CCNB1,EP300,AURKA,E2F7
19_Member	GO Biological Processes	GO:0031571	mitotic G1 DNA damage checkpoint	-1.64993	-0.236103	4/63	891,2033,6790,144455	CCNB1,EP300,AURKA,E2F7
19_Member	GO Biological Processes	GO:0044819	mitotic G1/S transition checkpoint	-1.64993	-0.236103	4/63	891,2033,6790,144455	CCNB1,EP300,AURKA,E2F7
19_Member	GO Biological Processes	GO:0044783	G1 DNA damage checkpoint	-1.62759	-0.225663	4/64	891,2033,6790,144455	CCNB1,EP300,AURKA,E2F7
19_Member	GO Biological Processes	GO:0044773	mitotic DNA damage checkpoint	-1.6002	-0.211199	5/97	641,891,2033,6790,144455	BLM,CCNB1,EP300,AURKA,E2F7
19_Member	GO Biological Processes	GO:0016572	histone phosphorylation	-1.57548	-0.196412	3/38	890,891,6790	CCNA2,CCNB1,AURKA
19_Member	GO Biological Processes	GO:0072401	signal transduction involved in DNA integrity checkpoint	-1.44485	-0.102207	4/73	891,2033,6790,144455	CCNB1,EP300,AURKA,E2F7
19_Member	GO Biological Processes	GO:0072422	signal transduction involved in DNA damage checkpoint	-1.44485	-0.102207	4/73	891,2033,6790,144455	CCNB1,EP300,AURKA,E2F7
19_Member	GO Biological Processes	GO:0072395	signal transduction involved in cell cycle checkpoint	-1.42637	-0.0897061	4/74	891,2033,6790,144455	CCNB1,EP300,AURKA,E2F7
19_Member	GO Biological Processes	GO:0031145	anaphase-promoting complex-dependent catabolic process	-1.30566	-0.0178331	4/81	891,4085,5695,6790	CCNB1,MAD2L1,PSMB7,AURKA
20_Summary	GO Biological Processes	GO:0009792	embryo development ending in birth or egg hatching	-4.7162	-2.41871	27/646	655,677,891,1627,2033,2885,3714,3955,4071,4522,4751,4851,5727,6498,7779,10658,26005,50861,54799,54892,55959,56977,57493,64131,79583,85451,144455,1289,3720,4052,5019,5292,9645,9821,10439,10529,857,2889,3860,4233,4301,5046,7298,8754,9497,25861,80781	BMP7,ZFP36L1,CCNB1,DBN1,EP300,GRB2,JAG2,LFNG,TM4SF1,MTHFD1,NEK2,NOTCH1,PTCH1,SKIL,SLC30A1,CELF1,C2CD3,STMN3,MBTD1,NCAPG2,SULF2,STOX2,HEG1,XYLT1,TMEM231,UNK,E2F7,COL5A1,JARID2,LTBP1,OXCT1,PIM1,MICAL2,RB1CC1,OLFM1,NEBL,CAV1,RAPGEF1,KRT13,MET,AFDN,PCSK6,TYMS,ADAM9,SLC4A7,WHRN,COL18A1
20_Member	GO Biological Processes	GO:0009792	embryo development ending in birth or egg hatching	-4.7162	-2.41871	27/646	655,677,891,1627,2033,2885,3714,3955,4071,4522,4751,4851,5727,6498,7779,10658,26005,50861,54799,54892,55959,56977,57493,64131,79583,85451,144455	BMP7,ZFP36L1,CCNB1,DBN1,EP300,GRB2,JAG2,LFNG,TM4SF1,MTHFD1,NEK2,NOTCH1,PTCH1,SKIL,SLC30A1,CELF1,C2CD3,STMN3,MBTD1,NCAPG2,SULF2,STOX2,HEG1,XYLT1,TMEM231,UNK,E2F7
20_Member	GO Biological Processes	GO:0001701	in utero embryonic development	-4.57494	-2.30886	19/375	655,677,891,1627,2885,3714,4071,4751,4851,5727,6498,7779,26005,50861,54892,57493,79583,85451,144455	BMP7,ZFP36L1,CCNB1,DBN1,GRB2,JAG2,TM4SF1,NEK2,NOTCH1,PTCH1,SKIL,SLC30A1,C2CD3,STMN3,NCAPG2,HEG1,TMEM231,UNK,E2F7
20_Member	GO Biological Processes	GO:0043009	chordate embryonic development	-4.05923	-1.87984	25/629	655,677,891,1627,2033,2885,3714,3955,4071,4522,4751,4851,5727,6498,7779,26005,50861,54799,54892,55959,57493,64131,79583,85451,144455	BMP7,ZFP36L1,CCNB1,DBN1,EP300,GRB2,JAG2,LFNG,TM4SF1,MTHFD1,NEK2,NOTCH1,PTCH1,SKIL,SLC30A1,C2CD3,STMN3,MBTD1,NCAPG2,SULF2,HEG1,XYLT1,TMEM231,UNK,E2F7
20_Member	GO Biological Processes	GO:0007507	heart development	-1.90159	-0.389429	18/588	655,677,891,1289,2033,3720,4052,4522,4851,5019,5292,5727,9645,9821,10439,10529,26005,57493	BMP7,ZFP36L1,CCNB1,COL5A1,EP300,JARID2,LTBP1,MTHFD1,NOTCH1,OXCT1,PIM1,PTCH1,MICAL2,RB1CC1,OLFM1,NEBL,C2CD3,HEG1
20_Member	GO Biological Processes	GO:0003007	heart morphogenesis	-1.45991	-0.111207	9/260	655,1289,4851,5292,5727,9645,10439,26005,57493	BMP7,COL5A1,NOTCH1,PIM1,PTCH1,MICAL2,OLFM1,C2CD3,HEG1
20_Member	GO Biological Processes	GO:0030855	epithelial cell differentiation	-1.3306	-0.0332316	20/781	655,677,857,2889,3714,3860,4233,4301,4851,5046,5727,6498,7298,8754,9497,25861,57493,79583,80781,144455	BMP7,ZFP36L1,CAV1,RAPGEF1,JAG2,KRT13,MET,AFDN,NOTCH1,PCSK6,PTCH1,SKIL,TYMS,ADAM9,SLC4A7,WHRN,HEG1,TMEM231,COL18A1,E2F7
21_Summary	GO Biological Processes	GO:0051383	kinetochore organization	-4.64547	-2.3587	5/21	1062,1063,6047,10051,10592,3146,3148,4173,4176,4609,5757,23523,50809,57082,64754	CENPE,CENPF,RNF4,SMC4,SMC2,HMGB1,HMGB2,MCM4,MCM7,MYC,PTMA,CABIN1,HP1BP3,KNL1,SMYD3
21_Member	GO Biological Processes	GO:0051383	kinetochore organization	-4.64547	-2.3587	5/21	1062,1063,6047,10051,10592	CENPE,CENPF,RNF4,SMC4,SMC2
21_Member	GO Biological Processes	GO:0071824	protein-DNA complex subunit organization	-2.85017	-1.01286	13/288	1062,1063,3146,3148,4173,4176,4609,5757,6047,23523,50809,57082,64754	CENPE,CENPF,HMGB1,HMGB2,MCM4,MCM7,MYC,PTMA,RNF4,CABIN1,HP1BP3,KNL1,SMYD3
21_Member	GO Biological Processes	GO:0051382	kinetochore assembly	-2.63406	-0.861717	3/16	1062,1063,6047	CENPE,CENPF,RNF4
21_Member	GO Biological Processes	GO:0065004	protein-DNA complex assembly	-2.43635	-0.727135	11/248	1062,1063,3146,3148,4173,4176,6047,23523,50809,57082,64754	CENPE,CENPF,HMGB1,HMGB2,MCM4,MCM7,RNF4,CABIN1,HP1BP3,KNL1,SMYD3
21_Member	GO Biological Processes	GO:0034508	centromere complex assembly	-1.81999	-0.336253	4/56	1062,1063,6047,57082	CENPE,CENPF,RNF4,KNL1
22_Summary	GO Biological Processes	GO:0031109	microtubule polymerization or depolymerization	-4.58943	-2.31827	10/114	4137,4233,6904,9928,10426,11004,50861,55835,57606,344148,63979,1627,2033,2885,3146,6047,11124,23406,23514,56919,56937,57580	MAPT,MET,TBCD,KIF14,TUBGCP3,KIF2C,STMN3,CENPJ,SLAIN2,NCKAP5,FIGNL1,DBN1,EP300,GRB2,HMGB1,RNF4,FAF1,COTL1,SPIDR,DHX33,PMEPA1,PREX1
22_Member	GO Biological Processes	GO:0031109	microtubule polymerization or depolymerization	-4.58943	-2.31827	10/114	4137,4233,6904,9928,10426,11004,50861,55835,57606,344148	MAPT,MET,TBCD,KIF14,TUBGCP3,KIF2C,STMN3,CENPJ,SLAIN2,NCKAP5
22_Member	GO Biological Processes	GO:0046785	microtubule polymerization	-2.69765	-0.89748	6/77	4137,4233,6904,10426,55835,57606	MAPT,MET,TBCD,TUBGCP3,CENPJ,SLAIN2
22_Member	GO Biological Processes	GO:0031122	cytoplasmic microtubule organization	-2.68982	-0.89748	5/53	4137,10426,50861,57606,63979	MAPT,TUBGCP3,STMN3,SLAIN2,FIGNL1
22_Member	GO Biological Processes	GO:0043254	regulation of protein complex assembly	-2.15722	-0.526021	16/469	1627,2033,2885,3146,4137,4233,6047,6904,9928,11124,23406,23514,56919,56937,57580,57606	DBN1,EP300,GRB2,HMGB1,MAPT,MET,RNF4,TBCD,KIF14,FAF1,COTL1,SPIDR,DHX33,PMEPA1,PREX1,SLAIN2
22_Member	GO Biological Processes	GO:0007020	microtubule nucleation	-2.02182	-0.454081	3/26	10426,55835,57606	TUBGCP3,CENPJ,SLAIN2
22_Member	GO Biological Processes	GO:0031113	regulation of microtubule polymerization	-1.98834	-0.437094	4/50	4137,4233,6904,57606	MAPT,MET,TBCD,SLAIN2
22_Member	GO Biological Processes	GO:0031110	regulation of microtubule polymerization or depolymerization	-1.95008	-0.416959	5/79	4137,4233,6904,50861,57606	MAPT,MET,TBCD,STMN3,SLAIN2
22_Member	GO Biological Processes	GO:0031116	positive regulation of microtubule polymerization	-1.8903	-0.385204	3/29	4137,4233,57606	MAPT,MET,SLAIN2
22_Member	GO Biological Processes	GO:0031112	positive regulation of microtubule polymerization or depolymerization	-1.73782	-0.290825	3/33	4137,4233,57606	MAPT,MET,SLAIN2
22_Member	GO Biological Processes	GO:0051258	protein polymerization	-1.61485	-0.218409	10/284	1627,2885,4137,4233,6904,10426,23406,55835,57580,57606	DBN1,GRB2,MAPT,MET,TBCD,TUBGCP3,COTL1,CENPJ,PREX1,SLAIN2
22_Member	GO Biological Processes	GO:0032271	regulation of protein polymerization	-1.47273	-0.119188	8/218	1627,2885,4137,4233,6904,23406,57580,57606	DBN1,GRB2,MAPT,MET,TBCD,COTL1,PREX1,SLAIN2
23_Summary	GO Biological Processes	GO:0048545	response to steroid hormone	-4.41965	-2.17332	19/385	596,655,677,760,857,2033,2274,3148,4851,6047,6502,6715,7057,7298,7337,8754,23426,56937,64754,641,890,891,2889,3488,5292,5727,10268,23514,116151,3146,5979,23328,57539,858,2885,9847,23236,64710,116372,55765,90268	BCL2,BMP7,ZFP36L1,CA2,CAV1,EP300,FHL2,HMGB2,NOTCH1,RNF4,SKP2,SRD5A1,THBS1,TYMS,UBE3A,ADAM9,GRIP1,PMEPA1,SMYD3,BLM,CCNA2,CCNB1,RAPGEF1,IGFBP5,PIM1,PTCH1,RAMP3,SPIDR,FAM210B,HMGB1,RET,SASH1,WDR35,CAV2,GRB2,C2CD5,PLCB1,NUCKS1,LYPD1,INAVA,OTULIN
23_Member	GO Biological Processes	GO:0048545	response to steroid hormone	-4.41965	-2.17332	19/385	596,655,677,760,857,2033,2274,3148,4851,6047,6502,6715,7057,7298,7337,8754,23426,56937,64754	BCL2,BMP7,ZFP36L1,CA2,CAV1,EP300,FHL2,HMGB2,NOTCH1,RNF4,SKP2,SRD5A1,THBS1,TYMS,UBE3A,ADAM9,GRIP1,PMEPA1,SMYD3
23_Member	GO Biological Processes	GO:0071407	cellular response to organic cyclic compound	-3.76642	-1.67644	22/542	641,655,677,857,890,891,2033,2274,2889,3488,5292,5727,6047,6502,6715,7337,10268,23426,23514,56937,64754,116151	BLM,BMP7,ZFP36L1,CAV1,CCNA2,CCNB1,EP300,FHL2,RAPGEF1,IGFBP5,PIM1,PTCH1,RNF4,SKP2,SRD5A1,UBE3A,RAMP3,GRIP1,SPIDR,PMEPA1,SMYD3,FAM210B
23_Member	GO Biological Processes	GO:0071396	cellular response to lipid	-3.45352	-1.44606	23/610	655,677,890,891,2033,2274,3146,3148,5292,5727,5979,6047,6502,6715,7337,8754,10268,23328,23426,56937,57539,64754,116151	BMP7,ZFP36L1,CCNA2,CCNB1,EP300,FHL2,HMGB1,HMGB2,PIM1,PTCH1,RET,RNF4,SKP2,SRD5A1,UBE3A,ADAM9,RAMP3,SASH1,GRIP1,PMEPA1,WDR35,SMYD3,FAM210B
23_Member	GO Biological Processes	GO:0030521	androgen receptor signaling pathway	-3.22934	-1.29121	6/61	2033,2274,6047,7337,23426,56937	EP300,FHL2,RNF4,UBE3A,GRIP1,PMEPA1
23_Member	GO Biological Processes	GO:0032870	cellular response to hormone stimulus	-2.63705	-0.862989	23/703	655,677,760,857,858,890,2033,2274,2885,4851,6047,6502,6715,7337,9847,10268,23236,23426,56937,64710,64754,116151,116372	BMP7,ZFP36L1,CA2,CAV1,CAV2,CCNA2,EP300,FHL2,GRB2,NOTCH1,RNF4,SKP2,SRD5A1,UBE3A,C2CD5,RAMP3,PLCB1,GRIP1,PMEPA1,NUCKS1,SMYD3,FAM210B,LYPD1
23_Member	GO Biological Processes	GO:0071383	cellular response to steroid hormone stimulus	-2.41015	-0.709256	11/250	655,677,2033,2274,6047,6502,6715,7337,23426,56937,64754	BMP7,ZFP36L1,EP300,FHL2,RNF4,SKP2,SRD5A1,UBE3A,GRIP1,PMEPA1,SMYD3
23_Member	GO Biological Processes	GO:0030518	intracellular steroid hormone receptor signaling pathway	-2.12394	-0.509088	7/132	2033,2274,6047,6502,7337,23426,56937	EP300,FHL2,RNF4,SKP2,UBE3A,GRIP1,PMEPA1
23_Member	GO Biological Processes	GO:0043401	steroid hormone mediated signaling pathway	-1.86058	-0.367403	8/184	655,2033,2274,6047,6502,7337,23426,56937	BMP7,EP300,FHL2,RNF4,SKP2,UBE3A,GRIP1,PMEPA1
23_Member	GO Biological Processes	GO:0030522	intracellular receptor signaling pathway	-1.65205	-0.236801	10/280	2033,2274,5292,6047,6502,7337,23426,55765,56937,90268	EP300,FHL2,PIM1,RNF4,SKP2,UBE3A,GRIP1,INAVA,PMEPA1,OTULIN
23_Member	GO Biological Processes	GO:0009755	hormone-mediated signaling pathway	-1.31284	-0.0234177	8/235	655,2033,2274,6047,6502,7337,23426,56937	BMP7,EP300,FHL2,RNF4,SKP2,UBE3A,GRIP1,PMEPA1
24_Summary	GO Biological Processes	GO:0007386	compartment pattern specification	-4.32169	-2.0849	3/5	3955,4851,5090,3714,9497,25861,79583,2033,9787,7298,655,2762,4609,4522,5727,5046,79191	LFNG,NOTCH1,PBX3,JAG2,SLC4A7,WHRN,TMEM231,EP300,DLGAP5,TYMS,BMP7,GMDS,MYC,MTHFD1,PTCH1,PCSK6,IRX3
24_Member	GO Biological Processes	GO:0007386	compartment pattern specification	-4.32169	-2.0849	3/5	3955,4851,5090	LFNG,NOTCH1,PBX3
24_Member	GO Biological Processes	GO:0042491	inner ear auditory receptor cell differentiation	-2.69091	-0.89748	4/32	3714,4851,9497,25861	JAG2,NOTCH1,SLC4A7,WHRN
24_Member	GO Biological Processes	GO:0060563	neuroepithelial cell differentiation	-2.68982	-0.89748	5/53	3714,4851,9497,25861,79583	JAG2,NOTCH1,SLC4A7,WHRN,TMEM231
24_Member	GO Biological Processes	GO:0007221	positive regulation of transcription of Notch receptor target	-2.4815	-0.755143	3/18	2033,4851,9787	EP300,NOTCH1,DLGAP5
24_Member	GO Biological Processes	GO:0035315	hair cell differentiation	-2.33215	-0.65844	4/40	3714,4851,9497,25861	JAG2,NOTCH1,SLC4A7,WHRN
24_Member	GO Biological Processes	GO:0002065	columnar/cuboidal epithelial cell differentiation	-1.90779	-0.392312	6/112	3714,4851,7298,9497,25861,79583	JAG2,NOTCH1,TYMS,SLC4A7,WHRN,TMEM231
24_Member	GO Biological Processes	GO:0045747	positive regulation of Notch signaling pathway	-1.87353	-0.37192	4/54	2033,3714,3955,4851	EP300,JAG2,LFNG,NOTCH1
24_Member	GO Biological Processes	GO:0060113	inner ear receptor cell differentiation	-1.81999	-0.336253	4/56	3714,4851,9497,25861	JAG2,NOTCH1,SLC4A7,WHRN
24_Member	GO Biological Processes	GO:0007219	Notch signaling pathway	-1.74777	-0.294707	8/193	655,2033,2762,3714,3955,4609,4851,9787	BMP7,EP300,GMDS,JAG2,LFNG,MYC,NOTCH1,DLGAP5
24_Member	GO Biological Processes	GO:0061053	somite development	-1.7441	-0.294707	5/89	2033,3955,4522,4851,5727	EP300,LFNG,MTHFD1,NOTCH1,PTCH1
24_Member	GO Biological Processes	GO:0042490	mechanoreceptor differentiation	-1.69599	-0.267736	4/61	3714,4851,9497,25861	JAG2,NOTCH1,SLC4A7,WHRN
24_Member	GO Biological Processes	GO:0035282	segmentation	-1.55031	-0.17613	5/100	2033,3955,4851,5046,79191	EP300,LFNG,NOTCH1,PCSK6,IRX3
24_Member	GO Biological Processes	GO:0008593	regulation of Notch signaling pathway	-1.47158	-0.119188	5/105	655,2033,3714,3955,4851	BMP7,EP300,JAG2,LFNG,NOTCH1
25_Summary	GO Biological Processes	GO:2001236	regulation of extrinsic apoptotic signaling pathway	-4.13505	-1.93447	11/155	596,857,3064,3148,5979,6498,7057,9821,11124,51741,64798,2261,6387,57539,63979,220042,2033,9833	BCL2,CAV1,HTT,HMGB2,RET,SKIL,THBS1,RB1CC1,FAF1,WWOX,DEPTOR,FGFR3,CXCL12,WDR35,FIGNL1,DDIAS,EP300,MELK
25_Member	GO Biological Processes	GO:2001236	regulation of extrinsic apoptotic signaling pathway	-4.13505	-1.93447	11/155	596,857,3064,3148,5979,6498,7057,9821,11124,51741,64798	BCL2,CAV1,HTT,HMGB2,RET,SKIL,THBS1,RB1CC1,FAF1,WWOX,DEPTOR
25_Member	GO Biological Processes	GO:2001238	positive regulation of extrinsic apoptotic signaling pathway	-3.75381	-1.67051	6/49	857,5979,6498,7057,11124,51741	CAV1,RET,SKIL,THBS1,FAF1,WWOX
25_Member	GO Biological Processes	GO:0097191	extrinsic apoptotic signaling pathway	-3.31174	-1.33127	12/224	596,857,2261,3064,3148,5979,6498,7057,9821,11124,51741,64798	BCL2,CAV1,FGFR3,HTT,HMGB2,RET,SKIL,THBS1,RB1CC1,FAF1,WWOX,DEPTOR
25_Member	GO Biological Processes	GO:1902043	positive regulation of extrinsic apoptotic signaling pathway via death domain receptors	-2.81018	-0.984347	3/14	6498,7057,11124	SKIL,THBS1,FAF1
25_Member	GO Biological Processes	GO:2001233	regulation of apoptotic signaling pathway	-2.36103	-0.674792	15/406	596,857,3064,3148,5979,6387,6498,7057,9821,11124,51741,57539,63979,64798,220042	BCL2,CAV1,HTT,HMGB2,RET,CXCL12,SKIL,THBS1,RB1CC1,FAF1,WWOX,WDR35,FIGNL1,DEPTOR,DDIAS
25_Member	GO Biological Processes	GO:2001235	positive regulation of apoptotic signaling pathway	-1.92687	-0.40572	8/179	596,857,5979,6498,7057,11124,51741,57539	BCL2,CAV1,RET,SKIL,THBS1,FAF1,WWOX,WDR35
25_Member	GO Biological Processes	GO:0097190	apoptotic signaling pathway	-1.80754	-0.329597	18/602	596,857,2033,2261,3064,3148,5979,6387,6498,7057,9821,9833,11124,51741,57539,63979,64798,220042	BCL2,CAV1,EP300,FGFR3,HTT,HMGB2,RET,CXCL12,SKIL,THBS1,RB1CC1,MELK,FAF1,WWOX,WDR35,FIGNL1,DEPTOR,DDIAS
25_Member	GO Biological Processes	GO:0008625	extrinsic apoptotic signaling pathway via death domain receptors	-1.80258	-0.326275	5/86	596,3148,6498,7057,11124	BCL2,HMGB2,SKIL,THBS1,FAF1
25_Member	GO Biological Processes	GO:1902041	regulation of extrinsic apoptotic signaling pathway via death domain receptors	-1.76879	-0.307134	4/58	3148,6498,7057,11124	HMGB2,SKIL,THBS1,FAF1
25_Member	GO Biological Processes	GO:2001237	negative regulation of extrinsic apoptotic signaling pathway	-1.4869	-0.130804	5/104	596,3064,3148,7057,9821	BCL2,HTT,HMGB2,THBS1,RB1CC1
25_Member	GO Biological Processes	GO:2001234	negative regulation of apoptotic signaling pathway	-1.35785	-0.0499208	8/230	596,3064,3148,6387,7057,9821,63979,220042	BCL2,HTT,HMGB2,CXCL12,THBS1,RB1CC1,FIGNL1,DDIAS
26_Summary	GO Biological Processes	GO:0070848	response to growth factor	-4.12071	-1.92446	28/739	607,655,677,857,858,890,2033,2261,2321,2885,2889,4052,4137,4176,4609,4851,5046,5796,6498,6715,7057,7337,8754,10272,51741,55959,56937,387914	BCL9,BMP7,ZFP36L1,CAV1,CAV2,CCNA2,EP300,FGFR3,FLT1,GRB2,RAPGEF1,LTBP1,MAPT,MCM7,MYC,NOTCH1,PCSK6,PTPRK,SKIL,SRD5A1,THBS1,UBE3A,ADAM9,FSTL3,WWOX,SULF2,PMEPA1,SHISA2
26_Member	GO Biological Processes	GO:0070848	response to growth factor	-4.12071	-1.92446	28/739	607,655,677,857,858,890,2033,2261,2321,2885,2889,4052,4137,4176,4609,4851,5046,5796,6498,6715,7057,7337,8754,10272,51741,55959,56937,387914	BCL9,BMP7,ZFP36L1,CAV1,CAV2,CCNA2,EP300,FGFR3,FLT1,GRB2,RAPGEF1,LTBP1,MAPT,MCM7,MYC,NOTCH1,PCSK6,PTPRK,SKIL,SRD5A1,THBS1,UBE3A,ADAM9,FSTL3,WWOX,SULF2,PMEPA1,SHISA2
26_Member	GO Biological Processes	GO:0071363	cellular response to growth factor stimulus	-4.02926	-1.85806	27/709	607,655,677,857,858,890,2033,2261,2321,2885,2889,4052,4137,4176,4851,5046,5796,6498,6715,7057,7337,8754,10272,51741,55959,56937,387914	BCL9,BMP7,ZFP36L1,CAV1,CAV2,CCNA2,EP300,FGFR3,FLT1,GRB2,RAPGEF1,LTBP1,MAPT,MCM7,NOTCH1,PCSK6,PTPRK,SKIL,SRD5A1,THBS1,UBE3A,ADAM9,FSTL3,WWOX,SULF2,PMEPA1,SHISA2
26_Member	GO Biological Processes	GO:0090287	regulation of cellular response to growth factor stimulus	-3.26751	-1.3075	14/293	607,857,858,2033,2321,4052,4851,5046,6498,7057,10272,55959,56937,387914	BCL9,CAV1,CAV2,EP300,FLT1,LTBP1,NOTCH1,PCSK6,SKIL,THBS1,FSTL3,SULF2,PMEPA1,SHISA2
26_Member	GO Biological Processes	GO:0090288	negative regulation of cellular response to growth factor stimulus	-3.2396	-1.2991	10/166	857,858,4052,4851,6498,7057,10272,55959,56937,387914	CAV1,CAV2,LTBP1,NOTCH1,SKIL,THBS1,FSTL3,SULF2,PMEPA1,SHISA2
26_Member	GO Biological Processes	GO:0090092	regulation of transmembrane receptor protein serine/threonine kinase signaling pathway	-3.0017	-1.10432	12/243	607,655,857,858,2033,4052,4851,5046,6498,7057,10272,56937	BCL9,BMP7,CAV1,CAV2,EP300,LTBP1,NOTCH1,PCSK6,SKIL,THBS1,FSTL3,PMEPA1
26_Member	GO Biological Processes	GO:0017015	regulation of transforming growth factor beta receptor signaling pathway	-2.9549	-1.07654	8/121	607,857,858,2033,4052,6498,7057,56937	BCL9,CAV1,CAV2,EP300,LTBP1,SKIL,THBS1,PMEPA1
26_Member	GO Biological Processes	GO:1903844	regulation of cellular response to transforming growth factor beta stimulus	-2.90895	-1.04882	8/123	607,857,858,2033,4052,6498,7057,56937	BCL9,CAV1,CAV2,EP300,LTBP1,SKIL,THBS1,PMEPA1
26_Member	GO Biological Processes	GO:0071560	cellular response to transforming growth factor beta stimulus	-2.86675	-1.02028	12/252	607,677,857,858,2033,4052,5796,6498,7057,8754,51741,56937	BCL9,ZFP36L1,CAV1,CAV2,EP300,LTBP1,PTPRK,SKIL,THBS1,ADAM9,WWOX,PMEPA1
26_Member	GO Biological Processes	GO:0071559	response to transforming growth factor beta	-2.78064	-0.956641	12/258	607,677,857,858,2033,4052,5796,6498,7057,8754,51741,56937	BCL9,ZFP36L1,CAV1,CAV2,EP300,LTBP1,PTPRK,SKIL,THBS1,ADAM9,WWOX,PMEPA1
26_Member	GO Biological Processes	GO:0007179	transforming growth factor beta receptor signaling pathway	-2.5983	-0.838635	10/202	607,857,858,2033,4052,5796,6498,7057,8754,56937	BCL9,CAV1,CAV2,EP300,LTBP1,PTPRK,SKIL,THBS1,ADAM9,PMEPA1
26_Member	GO Biological Processes	GO:0007178	transmembrane receptor protein serine/threonine kinase signaling pathway	-2.50712	-0.771927	14/353	607,655,857,858,2033,4052,4851,5046,5796,6498,7057,8754,10272,56937	BCL9,BMP7,CAV1,CAV2,EP300,LTBP1,NOTCH1,PCSK6,PTPRK,SKIL,THBS1,ADAM9,FSTL3,PMEPA1
26_Member	GO Biological Processes	GO:0090101	negative regulation of transmembrane receptor protein serine/threonine kinase signaling pathway	-2.23148	-0.583012	7/126	857,858,4052,4851,6498,10272,56937	CAV1,CAV2,LTBP1,NOTCH1,SKIL,FSTL3,PMEPA1
26_Member	GO Biological Processes	GO:0030512	negative regulation of transforming growth factor beta receptor signaling pathway	-1.90625	-0.392312	5/81	857,858,4052,6498,56937	CAV1,CAV2,LTBP1,SKIL,PMEPA1
26_Member	GO Biological Processes	GO:1903845	negative regulation of cellular response to transforming growth factor beta stimulus	-1.8638	-0.367403	5/83	857,858,4052,6498,56937	CAV1,CAV2,LTBP1,SKIL,PMEPA1
27_Summary	GO Biological Processes	GO:0051642	centrosome localization	-3.92801	-1.78693	5/29	4085,6790,29899,51134,259266,3064,51203	MAD2L1,AURKA,GPSM2,CEP83,ASPM,HTT,NUSAP1
27_Member	GO Biological Processes	GO:0051642	centrosome localization	-3.92801	-1.78693	5/29	4085,6790,29899,51134,259266	MAD2L1,AURKA,GPSM2,CEP83,ASPM
27_Member	GO Biological Processes	GO:0061842	microtubule organizing center localization	-3.8549	-1.7335	5/30	4085,6790,29899,51134,259266	MAD2L1,AURKA,GPSM2,CEP83,ASPM
27_Member	GO Biological Processes	GO:0051653	spindle localization	-2.88399	-1.03171	5/48	3064,4085,29899,51203,259266	HTT,MAD2L1,GPSM2,NUSAP1,ASPM
27_Member	GO Biological Processes	GO:0040001	establishment of mitotic spindle localization	-2.6406	-0.864905	4/33	3064,4085,29899,51203	HTT,MAD2L1,GPSM2,NUSAP1
27_Member	GO Biological Processes	GO:0051293	establishment of spindle localization	-2.21901	-0.579537	4/43	3064,4085,29899,51203	HTT,MAD2L1,GPSM2,NUSAP1
27_Member	GO Biological Processes	GO:0000132	establishment of mitotic spindle orientation	-1.8903	-0.385204	3/29	3064,4085,29899	HTT,MAD2L1,GPSM2
27_Member	GO Biological Processes	GO:0051294	establishment of spindle orientation	-1.66957	-0.250745	3/35	3064,4085,29899	HTT,MAD2L1,GPSM2
28_Summary	GO Biological Processes	GO:0071478	cellular response to radiation	-3.92681	-1.78693	12/192	641,1894,2033,2885,4609,5422,5796,10714,10715,23514,63979,64710,596,6387,6506,9768,85461,143570,677,4638	BLM,ECT2,EP300,GRB2,MYC,POLA1,PTPRK,POLD3,CERS1,SPIDR,FIGNL1,NUCKS1,BCL2,CXCL12,SLC1A2,PCLAF,TANC1,XRRA1,ZFP36L1,MYLK
28_Member	GO Biological Processes	GO:0071478	cellular response to radiation	-3.92681	-1.78693	12/192	641,1894,2033,2885,4609,5422,5796,10714,10715,23514,63979,64710	BLM,ECT2,EP300,GRB2,MYC,POLA1,PTPRK,POLD3,CERS1,SPIDR,FIGNL1,NUCKS1
28_Member	GO Biological Processes	GO:0009314	response to radiation	-3.12138	-1.21084	18/449	596,641,1894,2033,2885,4609,5422,5796,6387,6506,9768,10714,10715,23514,63979,64710,85461,143570	BCL2,BLM,ECT2,EP300,GRB2,MYC,POLA1,PTPRK,CXCL12,SLC1A2,PCLAF,POLD3,CERS1,SPIDR,FIGNL1,NUCKS1,TANC1,XRRA1
28_Member	GO Biological Processes	GO:0010212	response to ionizing radiation	-2.9981	-1.10287	9/148	596,641,1894,2885,4609,23514,63979,64710,143570	BCL2,BLM,ECT2,GRB2,MYC,SPIDR,FIGNL1,NUCKS1,XRRA1
28_Member	GO Biological Processes	GO:0071479	cellular response to ionizing radiation	-2.8796	-1.02927	6/71	641,1894,2885,23514,63979,64710	BLM,ECT2,GRB2,SPIDR,FIGNL1,NUCKS1
28_Member	GO Biological Processes	GO:0071214	cellular response to abiotic stimulus	-2.73693	-0.921962	14/333	641,677,1894,2033,2885,4609,4638,5422,5796,10714,10715,23514,63979,64710	BLM,ZFP36L1,ECT2,EP300,GRB2,MYC,MYLK,POLA1,PTPRK,POLD3,CERS1,SPIDR,FIGNL1,NUCKS1
28_Member	GO Biological Processes	GO:0104004	cellular response to environmental stimulus	-2.73693	-0.921962	14/333	641,677,1894,2033,2885,4609,4638,5422,5796,10714,10715,23514,63979,64710	BLM,ZFP36L1,ECT2,EP300,GRB2,MYC,MYLK,POLA1,PTPRK,POLD3,CERS1,SPIDR,FIGNL1,NUCKS1
28_Member	GO Biological Processes	GO:0034644	cellular response to UV	-2.5326	-0.788388	6/83	2033,4609,5422,5796,10714,10715	EP300,MYC,POLA1,PTPRK,POLD3,CERS1
28_Member	GO Biological Processes	GO:0009411	response to UV	-2.51662	-0.778423	8/142	596,2033,4609,5422,5796,9768,10714,10715	BCL2,EP300,MYC,POLA1,PTPRK,PCLAF,POLD3,CERS1
28_Member	GO Biological Processes	GO:0071482	cellular response to light stimulus	-1.62011	-0.222302	6/130	2033,4609,5422,5796,10714,10715	EP300,MYC,POLA1,PTPRK,POLD3,CERS1
28_Member	GO Biological Processes	GO:0009416	response to light stimulus	-1.35415	-0.0489912	10/315	596,2033,4609,5422,5796,6506,9768,10714,10715,85461	BCL2,EP300,MYC,POLA1,PTPRK,SLC1A2,PCLAF,POLD3,CERS1,TANC1
29_Summary	GO Biological Processes	GO:0140056	organelle localization by membrane tethering	-3.80037	-1.69322	11/169	858,4751,4905,7840,10806,26005,51134,55835,60412,117177,152579,6790,9768,348654,3064,3983,4851,57539,79583,857,4638,4651,54443	CAV2,NEK2,NSF,ALMS1,SDCCAG8,C2CD3,CEP83,CENPJ,EXOC4,RAB3IP,SCFD2,AURKA,PCLAF,GEN1,HTT,ABLIM1,NOTCH1,WDR35,TMEM231,CAV1,MYLK,MYO10,ANLN
29_Member	GO Biological Processes	GO:0140056	organelle localization by membrane tethering	-3.80037	-1.69322	11/169	858,4751,4905,7840,10806,26005,51134,55835,60412,117177,152579	CAV2,NEK2,NSF,ALMS1,SDCCAG8,C2CD3,CEP83,CENPJ,EXOC4,RAB3IP,SCFD2
29_Member	GO Biological Processes	GO:0022406	membrane docking	-3.60398	-1.55528	11/178	858,4751,4905,7840,10806,26005,51134,55835,60412,117177,152579	CAV2,NEK2,NSF,ALMS1,SDCCAG8,C2CD3,CEP83,CENPJ,EXOC4,RAB3IP,SCFD2
29_Member	GO Biological Processes	GO:0097711	ciliary basal body-plasma membrane docking	-2.92092	-1.05194	7/95	4751,7840,10806,26005,51134,55835,117177	NEK2,ALMS1,SDCCAG8,C2CD3,CEP83,CENPJ,RAB3IP
29_Member	GO Biological Processes	GO:0007098	centrosome cycle	-2.86397	-1.01942	8/125	4751,6790,7840,9768,10806,26005,55835,348654	NEK2,AURKA,ALMS1,PCLAF,SDCCAG8,C2CD3,CENPJ,GEN1
29_Member	GO Biological Processes	GO:0031023	microtubule organizing center organization	-2.67273	-0.882082	8/134	4751,6790,7840,9768,10806,26005,55835,348654	NEK2,AURKA,ALMS1,PCLAF,SDCCAG8,C2CD3,CENPJ,GEN1
29_Member	GO Biological Processes	GO:0046605	regulation of centrosome cycle	-2.5166	-0.778423	5/58	4751,6790,7840,55835,348654	NEK2,AURKA,ALMS1,CENPJ,GEN1
29_Member	GO Biological Processes	GO:0007099	centriole replication	-1.57548	-0.196412	3/38	7840,26005,55835	ALMS1,C2CD3,CENPJ
29_Member	GO Biological Processes	GO:0051298	centrosome duplication	-1.54251	-0.17252	4/68	7840,26005,55835,348654	ALMS1,C2CD3,CENPJ,GEN1
29_Member	GO Biological Processes	GO:0098534	centriole assembly	-1.48995	-0.131353	3/41	7840,26005,55835	ALMS1,C2CD3,CENPJ
29_Member	GO Biological Processes	GO:0010824	regulation of centrosome duplication	-1.43705	-0.0968151	3/43	7840,55835,348654	ALMS1,CENPJ,GEN1
29_Member	GO Biological Processes	GO:0060271	cilium assembly	-1.4087	-0.0815228	12/395	3064,3983,4751,4851,7840,10806,26005,51134,55835,57539,79583,117177	HTT,ABLIM1,NEK2,NOTCH1,ALMS1,SDCCAG8,C2CD3,CEP83,CENPJ,WDR35,TMEM231,RAB3IP
29_Member	GO Biological Processes	GO:0120031	plasma membrane bounded cell projection assembly	-1.32734	-0.032246	16/591	857,3064,3983,4638,4651,4751,4851,7840,10806,26005,51134,54443,55835,57539,79583,117177	CAV1,HTT,ABLIM1,MYLK,MYO10,NEK2,NOTCH1,ALMS1,SDCCAG8,C2CD3,CEP83,ANLN,CENPJ,WDR35,TMEM231,RAB3IP
30_Summary	GO Biological Processes	GO:0080135	regulation of cellular response to stress	-3.64414	-1.58344	27/749	596,655,857,2033,2889,3146,4137,4233,4609,4927,6387,6498,7074,9631,9821,10783,23201,23236,23239,23328,23514,55074,55706,55765,63979,64210,220042,1846,2274,7057,50861,57493,64798,80014	BCL2,BMP7,CAV1,EP300,RAPGEF1,HMGB1,MAPT,MET,MYC,NUP88,CXCL12,SKIL,TIAM1,NUP155,RB1CC1,NEK6,FAM168A,PLCB1,PHLPP1,SASH1,SPIDR,OXR1,NDC1,INAVA,FIGNL1,MMS19,DDIAS,DUSP4,FHL2,THBS1,STMN3,HEG1,DEPTOR,WWC2
30_Member	GO Biological Processes	GO:0080135	regulation of cellular response to stress	-3.64414	-1.58344	27/749	596,655,857,2033,2889,3146,4137,4233,4609,4927,6387,6498,7074,9631,9821,10783,23201,23236,23239,23328,23514,55074,55706,55765,63979,64210,220042	BCL2,BMP7,CAV1,EP300,RAPGEF1,HMGB1,MAPT,MET,MYC,NUP88,CXCL12,SKIL,TIAM1,NUP155,RB1CC1,NEK6,FAM168A,PLCB1,PHLPP1,SASH1,SPIDR,OXR1,NDC1,INAVA,FIGNL1,MMS19,DDIAS
30_Member	GO Biological Processes	GO:1902532	negative regulation of intracellular signal transduction	-1.7451	-0.294707	17/567	596,655,857,1846,2274,2889,4233,4609,6387,7057,23239,50861,57493,63979,64798,80014,220042	BCL2,BMP7,CAV1,DUSP4,FHL2,RAPGEF1,MET,MYC,CXCL12,THBS1,PHLPP1,STMN3,HEG1,FIGNL1,DEPTOR,WWC2,DDIAS
31_Summary	GO Biological Processes	GO:0046578	regulation of Ras protein signal transduction	-3.60514	-1.55528	13/239	1894,2885,2889,4233,4851,7074,9928,10160,25894,50861,57493,57580,84033,858,1122,4301,5361,6904,9462,23143,23236,26130,29127,54453,55635,91584,857,2261,2321,3146,3148,4137,4609,57181,57539,890,29899,51195	ECT2,GRB2,RAPGEF1,MET,NOTCH1,TIAM1,KIF14,FARP1,PLEKHG4,STMN3,HEG1,PREX1,OBSCN,CAV2,CHML,AFDN,PLXNA1,TBCD,RASAL2,LRCH1,PLCB1,GAPVD1,RACGAP1,RIN2,DEPDC1,PLXNA4,CAV1,FGFR3,FLT1,HMGB1,HMGB2,MAPT,MYC,SLC39A10,WDR35,CCNA2,GPSM2,RAPGEFL1
31_Member	GO Biological Processes	GO:0046578	regulation of Ras protein signal transduction	-3.60514	-1.55528	13/239	1894,2885,2889,4233,4851,7074,9928,10160,25894,50861,57493,57580,84033	ECT2,GRB2,RAPGEF1,MET,NOTCH1,TIAM1,KIF14,FARP1,PLEKHG4,STMN3,HEG1,PREX1,OBSCN
31_Member	GO Biological Processes	GO:0043087	regulation of GTPase activity	-3.20849	-1.27703	19/479	858,1122,1894,2889,4301,5361,6904,7074,9462,23143,23236,25894,26130,29127,50861,54453,55635,57580,91584	CAV2,CHML,ECT2,RAPGEF1,AFDN,PLXNA1,TBCD,TIAM1,RASAL2,LRCH1,PLCB1,PLEKHG4,GAPVD1,RACGAP1,STMN3,RIN2,DEPDC1,PREX1,PLXNA4
31_Member	GO Biological Processes	GO:0051056	regulation of small GTPase mediated signal transduction	-2.66574	-0.878464	14/339	1894,2885,2889,4233,4851,7074,9928,10160,25894,29127,50861,57493,57580,84033	ECT2,GRB2,RAPGEF1,MET,NOTCH1,TIAM1,KIF14,FARP1,PLEKHG4,RACGAP1,STMN3,HEG1,PREX1,OBSCN
31_Member	GO Biological Processes	GO:0035023	regulation of Rho protein signal transduction	-2.53547	-0.788388	8/141	1894,4233,7074,10160,25894,57493,57580,84033	ECT2,MET,TIAM1,FARP1,PLEKHG4,HEG1,PREX1,OBSCN
31_Member	GO Biological Processes	GO:0051345	positive regulation of hydrolase activity	-2.45313	-0.737487	24/771	857,858,1122,1894,2261,2321,2889,3146,3148,4137,4301,4609,6904,7074,9462,23236,25894,26130,29127,54453,55635,57181,57539,57580	CAV1,CAV2,CHML,ECT2,FGFR3,FLT1,RAPGEF1,HMGB1,HMGB2,MAPT,AFDN,MYC,TBCD,TIAM1,RASAL2,PLCB1,PLEKHG4,GAPVD1,RACGAP1,RIN2,DEPDC1,SLC39A10,WDR35,PREX1
31_Member	GO Biological Processes	GO:0043547	positive regulation of GTPase activity	-2.37078	-0.680752	15/405	858,1122,1894,2889,4301,6904,7074,9462,23236,25894,26130,29127,54453,55635,57580	CAV2,CHML,ECT2,RAPGEF1,AFDN,TBCD,TIAM1,RASAL2,PLCB1,PLEKHG4,GAPVD1,RACGAP1,RIN2,DEPDC1,PREX1
31_Member	GO Biological Processes	GO:0007264	small GTPase mediated signal transduction	-2.33955	-0.660109	19/572	890,1122,1894,2885,2889,4233,4851,7074,9928,10160,25894,29127,29899,50861,51195,54453,57493,57580,84033	CCNA2,CHML,ECT2,GRB2,RAPGEF1,MET,NOTCH1,TIAM1,KIF14,FARP1,PLEKHG4,RACGAP1,GPSM2,STMN3,RAPGEFL1,RIN2,HEG1,PREX1,OBSCN
31_Member	GO Biological Processes	GO:0007265	Ras protein signal transduction	-1.97712	-0.430927	15/449	890,1894,2885,2889,4233,4851,7074,9928,10160,25894,29899,50861,57493,57580,84033	CCNA2,ECT2,GRB2,RAPGEF1,MET,NOTCH1,TIAM1,KIF14,FARP1,PLEKHG4,GPSM2,STMN3,HEG1,PREX1,OBSCN
31_Member	GO Biological Processes	GO:0007266	Rho protein signal transduction	-1.62029	-0.222302	8/204	1894,4233,7074,10160,25894,57493,57580,84033	ECT2,MET,TIAM1,FARP1,PLEKHG4,HEG1,PREX1,OBSCN
32_Summary	GO Biological Processes	GO:0097435	supramolecular fiber organization	-3.59848	-1.55528	25/674	596,1289,1627,2885,4137,4233,6387,6904,7840,8500,9645,9928,10426,10529,11004,22998,23406,50861,55835,57580,57606,63979,79709,84033,344148,1894,9493,29127,54443,154810,342527,857,9631,488	BCL2,COL5A1,DBN1,GRB2,MAPT,MET,CXCL12,TBCD,ALMS1,PPFIA1,MICAL2,KIF14,TUBGCP3,NEBL,KIF2C,LIMCH1,COTL1,STMN3,CENPJ,PREX1,SLAIN2,FIGNL1,COLGALT1,OBSCN,NCKAP5,ECT2,KIF23,RACGAP1,ANLN,AMOTL1,SMTNL2,CAV1,NUP155,ATP2A2
32_Member	GO Biological Processes	GO:0097435	supramolecular fiber organization	-3.59848	-1.55528	25/674	596,1289,1627,2885,4137,4233,6387,6904,7840,8500,9645,9928,10426,10529,11004,22998,23406,50861,55835,57580,57606,63979,79709,84033,344148	BCL2,COL5A1,DBN1,GRB2,MAPT,MET,CXCL12,TBCD,ALMS1,PPFIA1,MICAL2,KIF14,TUBGCP3,NEBL,KIF2C,LIMCH1,COTL1,STMN3,CENPJ,PREX1,SLAIN2,FIGNL1,COLGALT1,OBSCN,NCKAP5
32_Member	GO Biological Processes	GO:0031032	actomyosin structure organization	-2.62961	-0.86144	10/200	1894,4233,7840,8500,9493,10529,22998,29127,54443,84033	ECT2,MET,ALMS1,PPFIA1,KIF23,NEBL,LIMCH1,RACGAP1,ANLN,OBSCN
32_Member	GO Biological Processes	GO:1902903	regulation of supramolecular fiber organization	-2.1144	-0.507109	13/352	1627,2885,4137,4233,6387,6904,7840,8500,22998,23406,57580,57606,79709	DBN1,GRB2,MAPT,MET,CXCL12,TBCD,ALMS1,PPFIA1,LIMCH1,COTL1,PREX1,SLAIN2,COLGALT1
32_Member	GO Biological Processes	GO:0030036	actin cytoskeleton organization	-1.68341	-0.256623	19/667	596,1627,1894,2885,4233,6387,7840,8500,9493,9645,10529,22998,23406,29127,54443,57580,84033,154810,342527	BCL2,DBN1,ECT2,GRB2,MET,CXCL12,ALMS1,PPFIA1,KIF23,MICAL2,NEBL,LIMCH1,COTL1,RACGAP1,ANLN,PREX1,OBSCN,AMOTL1,SMTNL2
32_Member	GO Biological Processes	GO:0030029	actin filament-based process	-1.67834	-0.253013	21/760	596,857,1627,1894,2885,4233,6387,7840,8500,9493,9631,9645,10529,22998,23406,29127,54443,57580,84033,154810,342527	BCL2,CAV1,DBN1,ECT2,GRB2,MET,CXCL12,ALMS1,PPFIA1,KIF23,NUP155,MICAL2,NEBL,LIMCH1,COTL1,RACGAP1,ANLN,PREX1,OBSCN,AMOTL1,SMTNL2
32_Member	GO Biological Processes	GO:0110020	regulation of actomyosin structure organization	-1.63464	-0.229247	5/95	1894,4233,7840,8500,22998	ECT2,MET,ALMS1,PPFIA1,LIMCH1
32_Member	GO Biological Processes	GO:0032970	regulation of actin filament-based process	-1.45116	-0.10467	12/389	488,857,1627,1894,2885,4233,6387,7840,8500,22998,23406,57580	ATP2A2,CAV1,DBN1,ECT2,GRB2,MET,CXCL12,ALMS1,PPFIA1,LIMCH1,COTL1,PREX1
32_Member	GO Biological Processes	GO:0110053	regulation of actin filament organization	-1.45094	-0.10467	9/261	1627,2885,4233,6387,7840,8500,22998,23406,57580	DBN1,GRB2,MET,CXCL12,ALMS1,PPFIA1,LIMCH1,COTL1,PREX1
32_Member	GO Biological Processes	GO:0007015	actin filament organization	-1.36067	-0.05201	12/402	596,1627,2885,4233,6387,7840,8500,9645,10529,22998,23406,57580	BCL2,DBN1,GRB2,MET,CXCL12,ALMS1,PPFIA1,MICAL2,NEBL,LIMCH1,COTL1,PREX1
33_Summary	GO Biological Processes	GO:0061061	muscle structure development	-3.59848	-1.55528	25/674	488,596,607,677,857,858,891,1063,2033,3488,3720,4638,4851,5292,5738,9215,10529,23236,56704,57486,57493,64754,84033,85461,94104,655	ATP2A2,BCL2,BCL9,ZFP36L1,CAV1,CAV2,CCNB1,CENPF,EP300,IGFBP5,JARID2,MYLK,NOTCH1,PIM1,PTGFRN,LARGE1,NEBL,PLCB1,JPH1,NLN,HEG1,SMYD3,OBSCN,TANC1,PAXBP1,BMP7
33_Member	GO Biological Processes	GO:0061061	muscle structure development	-3.59848	-1.55528	25/674	488,596,607,677,857,858,891,1063,2033,3488,3720,4638,4851,5292,5738,9215,10529,23236,56704,57486,57493,64754,84033,85461,94104	ATP2A2,BCL2,BCL9,ZFP36L1,CAV1,CAV2,CCNB1,CENPF,EP300,IGFBP5,JARID2,MYLK,NOTCH1,PIM1,PTGFRN,LARGE1,NEBL,PLCB1,JPH1,NLN,HEG1,SMYD3,OBSCN,TANC1,PAXBP1
33_Member	GO Biological Processes	GO:0014902	myotube differentiation	-3.12385	-1.21108	8/114	596,607,858,4851,5738,57486,64754,85461	BCL2,BCL9,CAV2,NOTCH1,PTGFRN,NLN,SMYD3,TANC1
33_Member	GO Biological Processes	GO:0060537	muscle tissue development	-2.72808	-0.915514	16/409	596,607,655,857,858,891,1063,2033,3488,3720,4638,4851,5292,10529,57486,57493	BCL2,BCL9,BMP7,CAV1,CAV2,CCNB1,CENPF,EP300,IGFBP5,JARID2,MYLK,NOTCH1,PIM1,NEBL,NLN,HEG1
33_Member	GO Biological Processes	GO:0007517	muscle organ development	-2.71743	-0.914288	16/410	596,607,857,858,891,1063,2033,3720,4638,4851,5292,9215,56704,57486,57493,94104	BCL2,BCL9,CAV1,CAV2,CCNB1,CENPF,EP300,JARID2,MYLK,NOTCH1,PIM1,LARGE1,JPH1,NLN,HEG1,PAXBP1
33_Member	GO Biological Processes	GO:0051146	striated muscle cell differentiation	-2.30927	-0.637609	12/295	596,607,858,891,3488,4851,5738,10529,57486,64754,84033,85461	BCL2,BCL9,CAV2,CCNB1,IGFBP5,NOTCH1,PTGFRN,NEBL,NLN,SMYD3,OBSCN,TANC1
33_Member	GO Biological Processes	GO:0014706	striated muscle tissue development	-2.12386	-0.509088	14/391	596,607,655,857,858,891,1063,2033,3720,4851,5292,10529,57486,57493	BCL2,BCL9,BMP7,CAV1,CAV2,CCNB1,CENPF,EP300,JARID2,NOTCH1,PIM1,NEBL,NLN,HEG1
33_Member	GO Biological Processes	GO:0060538	skeletal muscle organ development	-2.06797	-0.480175	8/169	596,607,857,858,2033,4851,9215,57486	BCL2,BCL9,CAV1,CAV2,EP300,NOTCH1,LARGE1,NLN
33_Member	GO Biological Processes	GO:0055001	muscle cell development	-1.8348	-0.345188	8/186	488,596,858,891,4851,10529,64754,84033	ATP2A2,BCL2,CAV2,CCNB1,NOTCH1,NEBL,SMYD3,OBSCN
33_Member	GO Biological Processes	GO:0042692	muscle cell differentiation	-1.79812	-0.322635	13/387	488,596,607,858,891,3488,4851,5738,10529,57486,64754,84033,85461	ATP2A2,BCL2,BCL9,CAV2,CCNB1,IGFBP5,NOTCH1,PTGFRN,NEBL,NLN,SMYD3,OBSCN,TANC1
33_Member	GO Biological Processes	GO:0007519	skeletal muscle tissue development	-1.69973	-0.270008	7/160	596,607,857,858,2033,4851,57486	BCL2,BCL9,CAV1,CAV2,EP300,NOTCH1,NLN
33_Member	GO Biological Processes	GO:0014904	myotube cell development	-1.66957	-0.250745	3/35	596,858,64754	BCL2,CAV2,SMYD3
34_Summary	GO Biological Processes	GO:0042558	pteridine-containing compound metabolic process	-3.52765	-1.50026	5/35	4522,4548,6573,7298,8836,501,2739,55349,81579,138199,2752,8801,79944,10606	MTHFD1,MTR,SLC19A1,TYMS,GGH,ALDH7A1,GLO1,CHDH,PLA2G12A,CARNMT1,GLUL,SUCLG2,L2HGDH,PAICS
34_Member	GO Biological Processes	GO:0042558	pteridine-containing compound metabolic process	-3.52765	-1.50026	5/35	4522,4548,6573,7298,8836	MTHFD1,MTR,SLC19A1,TYMS,GGH
34_Member	GO Biological Processes	GO:0006760	folic acid-containing compound metabolic process	-2.85363	-1.01288	4/29	4522,6573,7298,8836	MTHFD1,SLC19A1,TYMS,GGH
34_Member	GO Biological Processes	GO:0006575	cellular modified amino acid metabolic process	-2.0848	-0.488446	9/203	501,2739,4522,6573,7298,8836,55349,81579,138199	ALDH7A1,GLO1,MTHFD1,SLC19A1,TYMS,GGH,CHDH,PLA2G12A,CARNMT1
34_Member	GO Biological Processes	GO:0043648	dicarboxylic acid metabolic process	-1.55031	-0.17613	5/100	2752,4522,6573,8801,79944	GLUL,MTHFD1,SLC19A1,SUCLG2,L2HGDH
34_Member	GO Biological Processes	GO:0009112	nucleobase metabolic process	-1.46311	-0.113796	3/42	4522,7298,10606	MTHFD1,TYMS,PAICS
35_Summary	GO Biological Processes	GO:0042176	regulation of protein catabolic process	-3.49821	-1.47839	17/381	580,857,4085,4905,5774,6125,6790,7337,8078,8754,11124,23274,25897,26088,26234,57520,81610,891,5695,6047,6502,9928,64839,677,3064,3146,5209,9736,9820,57484,596,23328,55521	BARD1,CAV1,MAD2L1,NSF,PTPN3,RPL5,AURKA,UBE3A,USP5,ADAM9,FAF1,CLEC16A,RNF19A,GGA1,FBXL5,HECW2,FAM83D,CCNB1,PSMB7,RNF4,SKP2,KIF14,FBXL17,ZFP36L1,HTT,HMGB1,PFKFB3,USP34,CUL7,RNF150,BCL2,SASH1,TRIM36
35_Member	GO Biological Processes	GO:0042176	regulation of protein catabolic process	-3.49821	-1.47839	17/381	580,857,4085,4905,5774,6125,6790,7337,8078,8754,11124,23274,25897,26088,26234,57520,81610	BARD1,CAV1,MAD2L1,NSF,PTPN3,RPL5,AURKA,UBE3A,USP5,ADAM9,FAF1,CLEC16A,RNF19A,GGA1,FBXL5,HECW2,FAM83D
35_Member	GO Biological Processes	GO:0045732	positive regulation of protein catabolic process	-2.91935	-1.05194	11/215	580,857,4905,6790,8078,8754,11124,25897,26088,26234,57520	BARD1,CAV1,NSF,AURKA,USP5,ADAM9,FAF1,RNF19A,GGA1,FBXL5,HECW2
35_Member	GO Biological Processes	GO:0043161	proteasome-mediated ubiquitin-dependent protein catabolic process	-2.61318	-0.851934	16/420	857,891,4085,5695,6047,6502,6790,7337,8078,9928,11124,23274,25897,26234,57520,64839	CAV1,CCNB1,MAD2L1,PSMB7,RNF4,SKP2,AURKA,UBE3A,USP5,KIF14,FAF1,CLEC16A,RNF19A,FBXL5,HECW2,FBXL17
35_Member	GO Biological Processes	GO:0009896	positive regulation of catabolic process	-2.57262	-0.814523	16/424	580,677,857,3064,3146,4905,5209,6790,8078,8754,11124,23274,25897,26088,26234,57520	BARD1,ZFP36L1,CAV1,HTT,HMGB1,NSF,PFKFB3,AURKA,USP5,ADAM9,FAF1,CLEC16A,RNF19A,GGA1,FBXL5,HECW2
35_Member	GO Biological Processes	GO:0006511	ubiquitin-dependent protein catabolic process	-2.27323	-0.614236	20/623	857,891,4085,5695,6047,6125,6502,6790,7337,8078,9736,9820,9928,11124,23274,25897,26234,57484,57520,64839	CAV1,CCNB1,MAD2L1,PSMB7,RNF4,RPL5,SKP2,AURKA,UBE3A,USP5,USP34,CUL7,KIF14,FAF1,CLEC16A,RNF19A,FBXL5,RNF150,HECW2,FBXL17
35_Member	GO Biological Processes	GO:0019941	modification-dependent protein catabolic process	-2.2287	-0.583012	20/629	857,891,4085,5695,6047,6125,6502,6790,7337,8078,9736,9820,9928,11124,23274,25897,26234,57484,57520,64839	CAV1,CCNB1,MAD2L1,PSMB7,RNF4,RPL5,SKP2,AURKA,UBE3A,USP5,USP34,CUL7,KIF14,FAF1,CLEC16A,RNF19A,FBXL5,RNF150,HECW2,FBXL17
35_Member	GO Biological Processes	GO:0043632	modification-dependent macromolecule catabolic process	-2.14912	-0.523325	20/640	857,891,4085,5695,6047,6125,6502,6790,7337,8078,9736,9820,9928,11124,23274,25897,26234,57484,57520,64839	CAV1,CCNB1,MAD2L1,PSMB7,RNF4,RPL5,SKP2,AURKA,UBE3A,USP5,USP34,CUL7,KIF14,FAF1,CLEC16A,RNF19A,FBXL5,RNF150,HECW2,FBXL17
35_Member	GO Biological Processes	GO:0000209	protein polyubiquitination	-2.14349	-0.519254	12/310	580,596,5695,6047,6502,7337,23328,25897,26234,55521,57520,64839	BARD1,BCL2,PSMB7,RNF4,SKP2,UBE3A,SASH1,RNF19A,FBXL5,TRIM36,HECW2,FBXL17
35_Member	GO Biological Processes	GO:0010498	proteasomal protein catabolic process	-2.09057	-0.492055	16/477	857,891,4085,5695,6047,6502,6790,7337,8078,9928,11124,23274,25897,26234,57520,64839	CAV1,CCNB1,MAD2L1,PSMB7,RNF4,SKP2,AURKA,UBE3A,USP5,KIF14,FAF1,CLEC16A,RNF19A,FBXL5,HECW2,FBXL17
35_Member	GO Biological Processes	GO:2000058	regulation of ubiquitin-dependent protein catabolic process	-1.82376	-0.336253	7/151	857,6125,6790,7337,8078,23274,25897	CAV1,RPL5,AURKA,UBE3A,USP5,CLEC16A,RNF19A
35_Member	GO Biological Processes	GO:0031331	positive regulation of cellular catabolic process	-1.65812	-0.240734	12/362	677,857,3064,3146,5209,6790,8078,8754,11124,23274,25897,26234	ZFP36L1,CAV1,HTT,HMGB1,PFKFB3,AURKA,USP5,ADAM9,FAF1,CLEC16A,RNF19A,FBXL5
35_Member	GO Biological Processes	GO:0051603	proteolysis involved in cellular protein catabolic process	-1.65424	-0.237566	20/718	857,891,4085,5695,6047,6125,6502,6790,7337,8078,9736,9820,9928,11124,23274,25897,26234,57484,57520,64839	CAV1,CCNB1,MAD2L1,PSMB7,RNF4,RPL5,SKP2,AURKA,UBE3A,USP5,USP34,CUL7,KIF14,FAF1,CLEC16A,RNF19A,FBXL5,RNF150,HECW2,FBXL17
35_Member	GO Biological Processes	GO:1903362	regulation of cellular protein catabolic process	-1.58204	-0.1977	9/247	857,6125,6790,7337,8078,11124,23274,25897,26234	CAV1,RPL5,AURKA,UBE3A,USP5,FAF1,CLEC16A,RNF19A,FBXL5
35_Member	GO Biological Processes	GO:1903364	positive regulation of cellular protein catabolic process	-1.47063	-0.118863	6/141	857,6790,8078,11124,25897,26234	CAV1,AURKA,USP5,FAF1,RNF19A,FBXL5
35_Member	GO Biological Processes	GO:0044257	cellular protein catabolic process	-1.3684	-0.0543168	20/773	857,891,4085,5695,6047,6125,6502,6790,7337,8078,9736,9820,9928,11124,23274,25897,26234,57484,57520,64839	CAV1,CCNB1,MAD2L1,PSMB7,RNF4,RPL5,SKP2,AURKA,UBE3A,USP5,USP34,CUL7,KIF14,FAF1,CLEC16A,RNF19A,FBXL5,RNF150,HECW2,FBXL17
36_Summary	GO Biological Processes	GO:0045216	cell-cell junction organization	-3.43029	-1.43097	10/157	857,1894,4301,6904,25861,54549,57493,60437,144100,221935,55706	CAV1,ECT2,AFDN,TBCD,WHRN,SDK2,HEG1,CDH26,PLEKHA7,SDK1,NDC1
36_Member	GO Biological Processes	GO:0045216	cell-cell junction organization	-3.43029	-1.43097	10/157	857,1894,4301,6904,25861,54549,57493,60437,144100,221935	CAV1,ECT2,AFDN,TBCD,WHRN,SDK2,HEG1,CDH26,PLEKHA7,SDK1
36_Member	GO Biological Processes	GO:0046931	pore complex assembly	-2.28573	-0.624229	3/21	4301,55706,144100	AFDN,NDC1,PLEKHA7
36_Member	GO Biological Processes	GO:0007043	cell-cell junction assembly	-1.70949	-0.271896	6/124	857,1894,4301,6904,57493,60437	CAV1,ECT2,AFDN,TBCD,HEG1,CDH26
36_Member	GO Biological Processes	GO:0044331	cell-cell adhesion mediated by cadherin	-1.41173	-0.0833077	3/44	4301,60437,144100	AFDN,CDH26,PLEKHA7
37_Summary	GO Biological Processes	GO:0006265	DNA topological change	-3.4195	-1.43097	3/9	3146,3148,7153,1676,2033,10622,56919,7374,9156,4233,6387,857,3955,7074,4851	HMGB1,HMGB2,TOP2A,DFFA,EP300,POLR3G,DHX33,UNG,EXO1,MET,CXCL12,CAV1,LFNG,TIAM1,NOTCH1
37_Member	GO Biological Processes	GO:0006265	DNA topological change	-3.4195	-1.43097	3/9	3146,3148,7153	HMGB1,HMGB2,TOP2A
37_Member	GO Biological Processes	GO:0006266	DNA ligation	-2.55521	-0.803342	3/17	3146,3148,7153	HMGB1,HMGB2,TOP2A
37_Member	GO Biological Processes	GO:0030262	apoptotic nuclear changes	-2.54513	-0.796339	4/35	1676,3146,3148,7153	DFFA,HMGB1,HMGB2,TOP2A
37_Member	GO Biological Processes	GO:0006921	cellular component disassembly involved in execution phase of apoptosis	-2.45587	-0.737926	4/37	1676,3146,3148,7153	DFFA,HMGB1,HMGB2,TOP2A
37_Member	GO Biological Processes	GO:0032069	regulation of nuclease activity	-2.22751	-0.583012	3/22	1676,3146,3148	DFFA,HMGB1,HMGB2
37_Member	GO Biological Processes	GO:0006309	apoptotic DNA fragmentation	-2.02182	-0.454081	3/26	1676,3146,3148	DFFA,HMGB1,HMGB2
37_Member	GO Biological Processes	GO:0032481	positive regulation of type I interferon production	-1.99537	-0.440213	5/77	2033,3146,3148,10622,56919	EP300,HMGB1,HMGB2,POLR3G,DHX33
37_Member	GO Biological Processes	GO:0000737	DNA catabolic process, endonucleolytic	-1.7031	-0.271896	3/34	1676,3146,3148	DFFA,HMGB1,HMGB2
37_Member	GO Biological Processes	GO:0002562	somatic diversification of immune receptors via germline recombination within a single locus	-1.62759	-0.225663	4/64	3146,3148,7374,9156	HMGB1,HMGB2,UNG,EXO1
37_Member	GO Biological Processes	GO:0016444	somatic cell DNA recombination	-1.62759	-0.225663	4/64	3146,3148,7374,9156	HMGB1,HMGB2,UNG,EXO1
37_Member	GO Biological Processes	GO:0050918	positive chemotaxis	-1.54251	-0.17252	4/68	3146,3148,4233,6387	HMGB1,HMGB2,MET,CXCL12
37_Member	GO Biological Processes	GO:0006308	DNA catabolic process	-1.48995	-0.131353	3/41	1676,3146,3148	DFFA,HMGB1,HMGB2
37_Member	GO Biological Processes	GO:0051099	positive regulation of binding	-1.46893	-0.117773	7/179	857,2033,3146,3148,3955,4233,7074	CAV1,EP300,HMGB1,HMGB2,LFNG,MET,TIAM1
37_Member	GO Biological Processes	GO:0002200	somatic diversification of immune receptors	-1.37284	-0.0564474	4/77	3146,3148,7374,9156	HMGB1,HMGB2,UNG,EXO1
37_Member	GO Biological Processes	GO:0002437	inflammatory response to antigenic stimulus	-1.36315	-0.0524312	3/46	3146,3148,4851	HMGB1,HMGB2,NOTCH1
38_Summary	GO Biological Processes	GO:0045647	negative regulation of erythrocyte differentiation	-3.4195	-1.43097	3/9	677,51621,54892,3148,116151,760,2033,3146,4609,4851,5292,5695,7057,10272,54517,286410,596,6229,6498	ZFP36L1,KLF13,NCAPG2,HMGB2,FAM210B,CA2,EP300,HMGB1,MYC,NOTCH1,PIM1,PSMB7,THBS1,FSTL3,PUS7,ATP11C,BCL2,RPS24,SKIL
38_Member	GO Biological Processes	GO:0045647	negative regulation of erythrocyte differentiation	-3.4195	-1.43097	3/9	677,51621,54892	ZFP36L1,KLF13,NCAPG2
38_Member	GO Biological Processes	GO:0045646	regulation of erythrocyte differentiation	-2.88399	-1.03171	5/48	677,3148,51621,54892,116151	ZFP36L1,HMGB2,KLF13,NCAPG2,FAM210B
38_Member	GO Biological Processes	GO:1903706	regulation of hemopoiesis	-2.09057	-0.492055	16/477	677,760,2033,3146,3148,4609,4851,5292,5695,7057,10272,51621,54517,54892,116151,286410	ZFP36L1,CA2,EP300,HMGB1,HMGB2,MYC,NOTCH1,PIM1,PSMB7,THBS1,FSTL3,KLF13,PUS7,NCAPG2,FAM210B,ATP11C
38_Member	GO Biological Processes	GO:0048872	homeostasis of number of cells	-1.99579	-0.440213	10/247	596,677,3146,3148,4851,6229,6498,51621,54892,116151	BCL2,ZFP36L1,HMGB1,HMGB2,NOTCH1,RPS24,SKIL,KLF13,NCAPG2,FAM210B
38_Member	GO Biological Processes	GO:0045637	regulation of myeloid cell differentiation	-1.93912	-0.411563	10/252	677,760,2033,3148,4609,7057,10272,51621,54892,116151	ZFP36L1,CA2,EP300,HMGB2,MYC,THBS1,FSTL3,KLF13,NCAPG2,FAM210B
38_Member	GO Biological Processes	GO:0002262	myeloid cell homeostasis	-1.86751	-0.370222	7/148	677,3146,3148,6229,51621,54892,116151	ZFP36L1,HMGB1,HMGB2,RPS24,KLF13,NCAPG2,FAM210B
38_Member	GO Biological Processes	GO:1903707	negative regulation of hemopoiesis	-1.76735	-0.307134	7/155	677,3146,4609,4851,10272,51621,54892	ZFP36L1,HMGB1,MYC,NOTCH1,FSTL3,KLF13,NCAPG2
38_Member	GO Biological Processes	GO:0034101	erythrocyte homeostasis	-1.72499	-0.280654	6/123	677,3148,6229,51621,54892,116151	ZFP36L1,HMGB2,RPS24,KLF13,NCAPG2,FAM210B
38_Member	GO Biological Processes	GO:0045638	negative regulation of myeloid cell differentiation	-1.70654	-0.271896	5/91	677,4609,10272,51621,54892	ZFP36L1,MYC,FSTL3,KLF13,NCAPG2
38_Member	GO Biological Processes	GO:0030218	erythrocyte differentiation	-1.32878	-0.0329158	5/115	677,3148,51621,54892,116151	ZFP36L1,HMGB2,KLF13,NCAPG2,FAM210B
39_Summary	GO Biological Processes	GO:1903431	positive regulation of cell maturation	-3.4195	-1.43097	3/9	596,5979,6790,9928,2033,116372,857,10268,64754,7057,51741,891,2590,10783,388228	BCL2,RET,AURKA,KIF14,EP300,LYPD1,CAV1,RAMP3,SMYD3,THBS1,WWOX,CCNB1,GALNT2,NEK6,SBK1
39_Member	GO Biological Processes	GO:1903431	positive regulation of cell maturation	-3.4195	-1.43097	3/9	596,5979,6790	BCL2,RET,AURKA
39_Member	GO Biological Processes	GO:1903429	regulation of cell maturation	-3.24717	-1.29945	4/23	596,5979,6790,9928	BCL2,RET,AURKA,KIF14
39_Member	GO Biological Processes	GO:0002209	behavioral defense response	-1.54608	-0.174165	3/39	596,2033,116372	BCL2,EP300,LYPD1
39_Member	GO Biological Processes	GO:0033138	positive regulation of peptidyl-serine phosphorylation	-1.47158	-0.119188	5/105	596,857,5979,10268,64754	BCL2,CAV1,RET,RAMP3,SMYD3
39_Member	GO Biological Processes	GO:0033555	multicellular organismal response to stress	-1.42637	-0.0897061	4/74	596,5979,7057,116372	BCL2,RET,THBS1,LYPD1
39_Member	GO Biological Processes	GO:2001239	regulation of extrinsic apoptotic signaling pathway in absence of ligand	-1.33983	-0.0406479	3/47	596,5979,51741	BCL2,RET,WWOX
39_Member	GO Biological Processes	GO:0018209	peptidyl-serine modification	-1.30141	-0.0151765	10/322	596,857,891,2590,5979,6790,10268,10783,64754,388228	BCL2,CAV1,CCNB1,GALNT2,RET,AURKA,RAMP3,NEK6,SMYD3,SBK1
40_Summary	GO Biological Processes	GO:0022411	cellular component disassembly	-3.2612	-1.3075	21/551	857,891,1676,3064,3146,3148,4609,4905,7153,9645,9821,9928,10783,11004,23107,23274,50861,55037,64432,91782,344148	CAV1,CCNB1,DFFA,HTT,HMGB1,HMGB2,MYC,NSF,TOP2A,MICAL2,RB1CC1,KIF14,NEK6,KIF2C,MRPS27,CLEC16A,STMN3,PTCD3,MRPS25,CHMP7,NCKAP5
40_Member	GO Biological Processes	GO:0022411	cellular component disassembly	-3.2612	-1.3075	21/551	857,891,1676,3064,3146,3148,4609,4905,7153,9645,9821,9928,10783,11004,23107,23274,50861,55037,64432,91782,344148	CAV1,CCNB1,DFFA,HTT,HMGB1,HMGB2,MYC,NSF,TOP2A,MICAL2,RB1CC1,KIF14,NEK6,KIF2C,MRPS27,CLEC16A,STMN3,PTCD3,MRPS25,CHMP7,NCKAP5
40_Member	GO Biological Processes	GO:0032984	protein-containing complex disassembly	-2.28785	-0.624229	13/335	857,4609,4905,9645,9928,11004,23107,23274,50861,55037,64432,91782,344148	CAV1,MYC,NSF,MICAL2,KIF14,KIF2C,MRPS27,CLEC16A,STMN3,PTCD3,MRPS25,CHMP7,NCKAP5
40_Member	GO Biological Processes	GO:0007019	microtubule depolymerization	-2.14871	-0.523325	4/45	9928,11004,50861,344148	KIF14,KIF2C,STMN3,NCKAP5
40_Member	GO Biological Processes	GO:0043624	cellular protein complex disassembly	-1.89584	-0.386347	9/218	4905,9645,9928,11004,23107,50861,55037,64432,344148	NSF,MICAL2,KIF14,KIF2C,MRPS27,STMN3,PTCD3,MRPS25,NCKAP5
40_Member	GO Biological Processes	GO:0051261	protein depolymerization	-1.39789	-0.0723695	5/110	9645,9928,11004,50861,344148	MICAL2,KIF14,KIF2C,STMN3,NCKAP5
