# Supplementary material
Source: Preprints.org preprint supplement (doi:10.20944/preprints202004.0323.v1)
Supplement: Supplementary file 1 [file supplementary › Supplementary_Table_4_list_of_overlapping_genes_with_siRNA-ER_experiment.xlsx]

## Sheet: LNA_ER_overlapping_genes
Gene name	Log2FC (LNA-DSCAM-AS1)	pvalue (LNA-DSCAM-AS1)	padj (LNA-DSCAM-AS1)	baseMean (siRNA-ER)	Log2FC (siRNA-ER)	pvalue (siRNA-ER)	padj (siRNA-ER)	regulation
DSCAM-AS1	-1.69225	3.77e-158	3.77e-158	30084.3	-0.718813	3.48e-13	5.74e-12	down_both
MAGI1	-1.66163	1.37e-52	9e-49	3221.78	-0.897713	5.25e-17	1.35e-15	down_both
PLCB1	-1.16054	3.54e-32	9.29e-29	7279.81	0.828375	2.87e-11	3.73e-10	LNA_down
ALDH3B2	1.36834	1.39e-31	3.04e-28	1688.39	-1.44505	4.65e-50	1.24e-47	LNA_up
FAM168A	-0.811934	1.3e-27	2.13e-24	8069.59	-0.257576	0.00559053	0.0167907	down_both
QPRT	0.847601	2.48e-27	3.61e-24	9199.32	-0.888144	2.82e-31	2.66e-29	LNA_up
S100A14	0.79408	9.67e-27	1.27e-23	19592.4	-0.351143	6.75e-05	0.000325817	LNA_up
SPIDR	-1.10426	3.58e-25	3.92e-22	3588.26	-0.458805	9.59e-14	1.69e-12	down_both
SPTSSB	0.661825	6.18e-23	5.8e-20	113865	-0.174312	0.0072348	0.0210162	LNA_up
MUC1	0.897493	5.69e-20	4.67e-17	5463.74	-0.747916	9.05e-27	5.78e-25	LNA_up
RET	-0.870715	2.61e-19	1.91e-16	6848.47	-1.20692	3.36e-38	4.81e-36	down_both
DLGAP5	-0.760759	4.04e-18	2.65e-15	2901.47	-1.06647	2.01e-16	4.83e-15	down_both
TFF1	0.755338	1.64e-17	1.03e-14	17339	-2.49526	1.22e-102	2.91e-99	LNA_up
OXCT1	-0.893007	4.78e-16	2.62e-13	1987.29	-0.482608	5.3e-05	0.000263534	down_both
USP34	-0.597706	1.69e-15	8.56e-13	16162.9	0.374347	0.000109111	0.00050068	LNA_down
LTBP1	-0.759915	2.53e-15	1.23e-12	5711.13	0.373809	2.7e-06	1.68e-05	LNA_down
S100A16	0.691585	3.82e-15	1.79e-12	23924.9	-0.846022	1.27e-43	2.36e-41	LNA_up
TAP1	0.603366	9.67e-15	4.38e-12	2973.07	0.303416	0.000446395	0.00178462	up_both
ATP11C	-0.814318	1.11e-14	4.85e-12	4428.15	0.926743	1.79e-27	1.2e-25	LNA_down
SQSTM1	0.536953	1.33e-14	5.64e-12	57826.4	0.989925	1.96e-34	2.38e-32	up_both
SLC6A14	0.486432	1.63e-14	6.71e-12	12607.7	-1.47292	1.55e-74	1.52e-71	LNA_up
MVP	0.83791	7.8e-14	3.1e-11	5970.64	0.272155	0.00161619	0.00564064	up_both
SHISA2	-0.587469	2.95e-13	1.08e-10	2409.27	0.85184	3.35e-11	4.3e-10	LNA_down
ABCA12	0.640028	3.08e-13	1.09e-10	3217.48	-1.74673	1.78e-51	5.31e-49	LNA_up
REEP5	0.519726	3.89e-13	1.35e-10	25592.5	0.174357	0.0184568	0.0467142	up_both
CLSTN2	-1.01648	1.98e-12	6.36e-10	4607.65	0.445969	9.27e-06	5.3e-05	LNA_down
HIST2H2AA4	0.599042	2.24e-12	7.01e-10	16311.2	0.209652	0.000791278	0.00297976	up_both
SIAH2	0.414543	5.6e-12	1.67e-09	4449.16	-0.378323	2.52e-07	1.87e-06	LNA_up
RNF4	-0.504394	1.05e-11	2.9e-09	5886.87	0.245931	0.000280845	0.00117264	LNA_down
GRB2	-0.420097	1.39e-11	3.64e-09	24814.9	-0.200846	0.000362732	0.00148201	down_both
BCL2	-0.433704	1.61e-11	4.15e-09	1020.63	-0.495743	0.00423198	0.0131647	down_both
ISG15	0.43706	2.47e-11	6.23e-09	9500.49	0.582917	2.59e-07	1.92e-06	up_both
AC068580.4	0.572521	4.67e-11	1.13e-08	1342.44	-1.47268	1.16e-55	4.12e-53	LNA_up
CAB39L	0.736663	5.24e-11	1.25e-08	2757.84	-1.0048	3.23e-45	6.52e-43	LNA_up
OPTN	0.550998	5.56e-11	1.3e-08	3513.95	0.527135	8.9e-16	1.97e-14	up_both
CA2	-0.529835	7.25e-11	1.64e-08	3300.69	-0.939989	6.15e-29	4.72e-27	down_both
SLC39A11	-0.644627	2.42e-10	5.05e-08	2899.59	-0.226645	0.00485283	0.014874	down_both
POLA1	-0.532758	2.55e-10	5.24e-08	2720.62	-0.835669	2.45e-23	1.17e-21	down_both
LGALS3BP	0.450733	2.6e-10	5.26e-08	13893.2	0.539224	6.89e-13	1.09e-11	up_both
TRANK1	0.730506	2.82e-10	5.61e-08	2075.75	0.35076	0.0028224	0.00919465	up_both
ERCC6L2	-0.752281	3e-10	5.89e-08	2386.29	0.409297	8.33e-05	0.000392553	LNA_down
IFI6	0.437803	3.11e-10	6e-08	29071.9	0.243366	0.0150278	0.0393015	up_both
MX1	0.478949	3.71e-10	7.06e-08	832.203	0.512119	0.00259719	0.00855518	up_both
UBE2L6	0.602822	4.42e-10	8.17e-08	1828.89	0.335293	0.000903154	0.003355	up_both
WASHC4	-0.5377	5.44e-10	9.92e-08	5295.47	0.483362	6.15e-08	5.02e-07	LNA_down
TM4SF1	-1.1338	6.69e-10	1.2e-07	316.504	1.45779	3.08e-10	3.49e-09	LNA_down
TAPBP	0.351593	6.88e-10	1.22e-07	12024.9	0.206139	0.00277508	0.00906164	up_both
CMPK2	0.802983	7.3e-10	1.28e-07	295.287	1.05479	2.32e-07	1.73e-06	up_both
LSS	0.586574	7.59e-10	1.31e-07	22170.2	-0.3165	2.69e-06	1.68e-05	LNA_up
OAS2	0.669951	9.17e-10	1.56e-07	923.076	0.771405	2.49e-05	0.000131842	up_both
HIST1H1C	0.606041	9.54e-10	1.61e-07	5144.1	-0.405766	4.45e-09	4.3e-08	LNA_up
IFITM10	0.76578	2.29e-09	3.67e-07	206.97	-0.817871	1.84e-06	1.18e-05	LNA_up
SELENBP1	0.508472	2.36e-09	3.74e-07	12608.7	-0.75801	1.76e-35	2.23e-33	LNA_up
IRF1	0.544848	2.58e-09	4.02e-07	1262.73	0.679932	1.38e-13	2.39e-12	up_both
RDH11	0.374424	2.65e-09	4.05e-07	7792.56	-0.163229	0.00928575	0.0260646	LNA_up
SAMHD1	0.42064	2.72e-09	4.08e-07	1688.86	0.361247	0.000537566	0.00210881	up_both
LCN2	0.727388	2.73e-09	4.08e-07	102.172	0.602393	0.00673412	0.0197388	up_both
ABCC5	0.399979	2.93e-09	4.32e-07	12929.1	-0.366029	6.17e-05	0.000301425	LNA_up
RNF19A	-0.626659	3.12e-09	4.55e-07	6434.59	0.681565	2.44e-16	5.8e-15	LNA_down
APOL1	0.732459	4.15e-09	5.86e-07	186.619	1.50196	8.09e-17	2.04e-15	up_both
APOL6	0.871308	4.27e-09	5.92e-07	203.856	1.58854	5.42e-21	2.04e-19	up_both
NLN	-0.472079	4.38e-09	5.99e-07	2901.15	-0.179565	0.012756	0.034221	down_both
SCD	0.459852	4.77e-09	6.45e-07	184752	-0.224854	0.0119068	0.0322687	LNA_up
DHCR24	0.378082	6.29e-09	8.26e-07	47535.7	-0.278658	7.01e-07	4.82e-06	LNA_up
ISG20	0.756861	6.25e-09	8.26e-07	348.133	0.714329	1.51e-07	1.16e-06	up_both
TMEM229B	0.488193	6.69e-09	8.62e-07	1866.58	-0.393168	2.14e-06	1.35e-05	LNA_up
TACC2	0.44566	6.76e-09	8.63e-07	3545.12	0.610597	1.06e-19	3.61e-18	up_both
METTL15	-0.685766	7.1e-09	8.97e-07	1170.86	-0.241341	0.00924879	0.0259739	down_both
FILIP1L	0.965695	7.4e-09	9.25e-07	4348.05	0.268628	0.000104032	0.000480401	up_both
RAB3IP	-0.684435	9.35e-09	1.14e-06	2861.23	-0.594487	1.49e-17	4e-16	down_both
SCFD2	-0.715813	1.15e-08	1.37e-06	634.41	-0.812827	1.18e-14	2.32e-13	down_both
NEU1	0.401061	1.51e-08	1.79e-06	9336.9	0.278516	0.00259983	0.00855971	up_both
SIAE	-0.755543	1.6e-08	1.88e-06	2588.29	0.272937	0.00707633	0.0206203	LNA_down
RNF150	-0.588018	1.65e-08	1.92e-06	1179.1	0.49632	9.74e-05	0.000452617	LNA_down
HELZ2	0.460319	1.68e-08	1.93e-06	11564.3	0.485085	3.59e-12	5.22e-11	up_both
TIMP1	0.550617	2.02e-08	2.31e-06	7024.22	-0.341504	4.55e-07	3.24e-06	LNA_up
PRR11	-0.379069	2.07e-08	2.32e-06	3850.24	-0.899506	1.25e-11	1.69e-10	down_both
FDFT1	0.429467	2.05e-08	2.32e-06	10974.6	-0.676306	2.74e-34	3.28e-32	LNA_up
COL18A1	-0.383755	2.26e-08	2.47e-06	24210	0.574805	6.86e-20	2.39e-18	LNA_down
FANCI	-0.357373	2.22e-08	2.47e-06	8519.68	-1.478	5.65e-46	1.24e-43	down_both
PHKB	-0.423016	2.46e-08	2.67e-06	3403.41	-0.344532	1.89e-05	0.000102164	down_both
COL5A1	-0.571663	2.54e-08	2.73e-06	6053.21	0.824689	1.48e-18	4.52e-17	LNA_down
DARS2	-0.354122	3.01e-08	3.19e-06	4871.98	-0.54822	5.89e-09	5.59e-08	down_both
ECH1	0.390252	3.16e-08	3.32e-06	8556.8	-0.244645	0.000450739	0.00180112	LNA_up
CRABP2	0.334804	3.36e-08	3.45e-06	26500.5	-0.237903	0.0107322	0.0295788	LNA_up
PARP14	0.352216	3.36e-08	3.45e-06	7916.31	0.907671	3.73e-33	4.19e-31	up_both
ARMCX1	0.545156	3.85e-08	3.92e-06	916.611	-0.608223	1.71e-06	1.1e-05	LNA_up
B2M	0.448425	3.99e-08	4e-06	23653.7	0.268863	0.00014348	0.000641158	up_both
RBM3	-0.34686	4.51e-08	4.49e-06	9857.9	-0.538053	1.49e-12	2.25e-11	down_both
FAM102B	0.363797	6.28e-08	6.2e-06	11550.9	-0.260213	7e-05	0.000336441	LNA_up
ZNFX1	0.388723	8.82e-08	8.39e-06	14508	0.412431	1.78e-09	1.81e-08	up_both
FTH1	0.333366	9.86e-08	9.25e-06	154890	0.27917	0.00263393	0.00865479	up_both
RHOC	0.303015	1.21e-07	1.13e-05	30511.1	0.161378	0.0115059	0.0313447	up_both
VPS18	0.428951	1.22e-07	1.13e-05	3680.24	0.187256	0.0140869	0.0371999	up_both
NCKAP5	-0.84629	1.32e-07	1.21e-05	2235.99	0.702244	7.75e-19	2.43e-17	LNA_down
JARID2	-0.399831	1.38e-07	1.25e-05	7120.11	-0.178918	0.00846427	0.0240942	down_both
SP110	0.460312	1.51e-07	1.35e-05	1944.44	0.374165	5.24e-05	0.000261027	up_both
RASAL2	-0.574647	1.92e-07	1.7e-05	1331.84	0.310098	0.000193055	0.00083677	LNA_down
KIAA1522	0.310845	2.6e-07	2.26e-05	24719.1	-0.192577	0.00250232	0.00828742	LNA_up
BMP7	-0.563876	3.06e-07	2.65e-05	41915	0.458197	3.67e-05	0.000188246	LNA_down
PRRC2B	-0.30026	3.36e-07	2.88e-05	41717.9	0.211784	0.0104798	0.0289978	LNA_down
SULF2	-0.311625	3.46e-07	2.95e-05	93645.1	0.432841	4.21e-13	6.88e-12	LNA_down
CUX1	-0.28286	3.8e-07	3.22e-05	23918.6	0.24776	1.7e-05	9.25e-05	LNA_down
IFIT1	0.460144	4.23e-07	3.53e-05	3678.7	1.09846	9.35e-15	1.85e-13	up_both
KMO	1.66103	4.3e-07	3.57e-05	107.236	-0.917858	0.00479363	0.0147114	LNA_up
MYCBP	-0.500321	4.62e-07	3.8e-05	3645.06	-0.368989	4.62e-05	0.000232659	down_both
INSIG1	0.460056	5.32e-07	4.28e-05	25494.3	-0.297383	2.3e-06	1.45e-05	LNA_up
IFI27	0.411896	6.55e-07	5.21e-05	4261.87	1.22001	3.31e-31	3.04e-29	up_both
BST2	0.300823	6.98e-07	5.52e-05	4134.77	0.579629	1.51e-10	1.8e-09	up_both
ANXA6	0.528237	7.38e-07	5.81e-05	6808.1	-0.49756	1.92e-10	2.24e-09	LNA_up
TTC28	-0.743843	7.88e-07	6.16e-05	534.955	0.696375	0.000120623	0.000547942	LNA_down
NKAIN1	-0.401352	7.96e-07	6.19e-05	516.774	0.398275	0.0055122	0.016615	LNA_down
PLA2G4C	0.796785	8.07e-07	6.23e-05	243.339	1.44064	6.49e-15	1.31e-13	up_both
ABAT	0.286741	9.33e-07	7.12e-05	15197.2	-0.584268	3.06e-08	2.63e-07	LNA_up
TMEM265	0.771979	1.07e-06	7.98e-05	699.665	-0.82738	3.07e-09	3.03e-08	LNA_up
HIST1H2BK	0.481863	1.21e-06	8.83e-05	5823.97	-0.480581	7.07e-08	5.73e-07	LNA_up
NFKB2	0.363329	1.26e-06	9.15e-05	2342.44	0.169813	0.0166215	0.0428268	up_both
GRIP1	-0.800768	1.37e-06	9.84e-05	1619.48	0.314367	0.00214227	0.00721783	LNA_down
LRP1B	-1.19371	1.45e-06	0.000103334	1772.92	0.813807	4.21e-13	6.88e-12	LNA_down
GSTCD	-0.579788	1.47e-06	0.000104283	1618.7	-0.247526	0.00111836	0.00406145	down_both
HIST1H4H	0.57538	1.63e-06	0.000113886	8847.45	0.575397	6.91e-15	1.39e-13	up_both
CENPF	-0.333493	1.75e-06	0.000120811	4120.71	-0.533429	1.07e-07	8.4e-07	down_both
SMC4	-0.369527	1.81e-06	0.000123125	11792.7	-0.495446	6.63e-07	4.59e-06	down_both
TOP2A	-0.335966	1.82e-06	0.000123125	12166.5	-1.63439	3.51e-44	6.83e-42	down_both
GBP3	0.526725	2.01e-06	0.000135091	346.468	-1.46721	4.12e-17	1.06e-15	LNA_up
SLC39A6	0.41029	2.24e-06	0.000148439	170273	-0.54376	2.01e-10	2.33e-09	LNA_up
CAV1	-0.80868	2.27e-06	0.000150047	4022.8	-0.212803	0.00836537	0.0238491	down_both
STMN3	-0.632912	2.42e-06	0.000159192	2571.18	-0.563582	6.09e-06	3.59e-05	down_both
ADIPOR2	0.378046	2.44e-06	0.000159302	20698.4	-0.164381	0.0034994	0.0111463	LNA_up
AP003419.2	1.20523	2.46e-06	0.000160184	228.395	1.05014	0.00076977	0.00290661	up_both
PLSCR1	0.379593	2.76e-06	0.00017692	2773.19	0.433842	1.02e-05	5.78e-05	up_both
BAG1	0.479513	3.25e-06	0.000203424	7372.98	-0.271033	0.0101766	0.0282853	LNA_up
DDR1	0.287143	3.47e-06	0.000216066	22470.1	-0.937485	7.05e-43	1.23e-40	LNA_up
PARP10	0.443084	3.67e-06	0.000227592	1288.11	0.514297	6.81e-08	5.53e-07	up_both
TRIQK	-0.409188	3.8e-06	0.000234583	9963.8	0.164633	0.016692	0.0429822	LNA_down
DDIAS	-0.474452	4.05e-06	0.000248371	1014.28	-2.04508	1.34e-84	1.5e-81	down_both
LGALS9	0.799368	4.24e-06	0.000257807	143.431	1.02757	6.49e-05	0.000314722	up_both
PARP9	0.351509	4.67e-06	0.000280341	4648.11	0.366232	3.11e-06	1.92e-05	up_both
GBP1	0.530864	4.85e-06	0.000287046	42.752	1.85387	2.81e-05	0.000147483	up_both
EEF1A2	0.311198	4.93e-06	0.000290376	87527.4	-0.248218	0.00185348	0.00636522	LNA_up
FMO5	0.78448	5.08e-06	0.000297768	842.624	-0.40312	5.21e-05	0.000259707	LNA_up
TRIP13	-0.380917	5.63e-06	0.000322999	1878.58	-0.493327	6.62e-05	0.000319873	down_both
ATP6AP1	0.286085	5.59e-06	0.000322999	24596.2	0.475831	4.6e-18	1.33e-16	up_both
STAT1	0.296851	5.61e-06	0.000322999	37386.4	0.503568	3.31e-08	2.83e-07	up_both
SND1	-0.282024	5.83e-06	0.000331569	15487.8	-0.257359	4.01e-05	0.000203993	down_both
APOL2	0.454979	5.9e-06	0.000333857	1106.24	0.292468	0.000923798	0.00342257	up_both
COMT	0.448551	6.12e-06	0.000344836	8217.14	-0.74289	1.53e-22	6.83e-21	LNA_up
UCK2	-0.337376	6.95e-06	0.000383269	1919.79	-0.569361	8.88e-14	1.57e-12	down_both
TYMS	-0.36645	6.99e-06	0.000384275	4016.91	-0.898269	4.54e-37	6.18e-35	down_both
PIM3	0.408797	7.34e-06	0.000400079	4104.68	-0.447	1.25e-09	1.3e-08	LNA_up
GALNT2	-0.348848	7.51e-06	0.000407759	6011.27	0.287637	1.13e-06	7.46e-06	LNA_down
NOP56	-0.26974	7.57e-06	0.000409297	5663.81	-0.387126	3.86e-06	2.35e-05	down_both
SGMS1-AS1	1.19922	7.72e-06	0.000415479	302.417	0.789331	0.00112025	0.00406669	up_both
DRAM1	0.35581	8.84e-06	0.000474125	7767.16	0.648083	1.28e-17	3.47e-16	up_both
S100A13	0.326064	9.05e-06	0.000482989	11109.5	-0.520474	7.64e-13	1.2e-11	LNA_up
NARS2	-0.46423	9.37e-06	0.000493674	1378.9	-0.42726	0.000383601	0.00155739	down_both
SCARB2	0.304894	9.4e-06	0.000493674	21425.6	0.202969	0.00129597	0.00462924	up_both
QSER1	-0.31158	9.53e-06	0.000498525	3527.13	-0.488681	8.49e-05	0.000399274	down_both
CCNA2	-0.332495	9.66e-06	0.000500606	3211.95	-0.98898	3.66e-12	5.33e-11	down_both
TNKS1BP1	0.287945	9.64e-06	0.000500606	8549.27	-0.617804	4.15e-21	1.58e-19	LNA_up
STAT2	0.450893	9.68e-06	0.000500606	3073.5	-0.364303	1.31e-05	7.3e-05	LNA_up
SULT1A1	0.437148	1.05e-05	0.000542942	870.575	-0.357929	0.0136387	0.0361833	LNA_up
NEDD4L	0.499783	1.15e-05	0.000585217	2596.4	0.378136	3.19e-06	1.97e-05	up_both
MXI1	-0.495802	1.17e-05	0.00059321	1429.92	0.372239	0.000359763	0.00147096	LNA_down
DDIT3	0.554032	1.19e-05	0.000602594	819.365	0.769977	6.38e-13	1.02e-11	up_both
WWC2	-0.441768	1.2e-05	0.000603799	2066.47	0.239176	0.00506405	0.0154422	LNA_down
MAD2L1	-0.349324	1.24e-05	0.000622821	2545.6	-0.886329	3.67e-15	7.6e-14	down_both
CDC42SE1	0.248988	1.25e-05	0.000624682	17394.9	-0.583176	1.8e-24	9.51e-23	LNA_up
ASCL1	1.10211	1.26e-05	0.000624682	2077.05	-2.8618	5.43e-13	8.73e-12	LNA_up
DDX60L	0.474822	1.33e-05	0.000659816	1032.82	0.625082	5.97e-07	4.16e-06	up_both
CSTB	0.275064	1.42e-05	0.000699579	14059.3	0.260694	0.000264333	0.00111099	up_both
CUL7	-0.371424	1.48e-05	0.000727614	6350.22	0.299142	2.24e-05	0.000119577	LNA_down
SLC2A6	0.492705	1.58e-05	0.000769836	1497.79	0.301635	0.000545617	0.00213738	up_both
FAF1	-0.379837	1.74e-05	0.000833155	3340.56	-0.225732	0.00221167	0.00742175	down_both
SHISA5	0.306554	1.75e-05	0.000834817	18057.6	-0.180258	0.00268289	0.0087984	LNA_up
ERAP1	0.399208	1.83e-05	0.000868464	4234.57	0.223182	0.00145353	0.00513507	up_both
PDZK1	-0.322374	1.88e-05	0.000888805	110.766	-1.63393	1.22e-08	1.1e-07	down_both
CMSS1	-0.391091	1.9e-05	0.000896527	1430.66	-0.61196	2.49e-11	3.23e-10	down_both
PTPRK	-0.320384	2.09e-05	0.000978397	29512	0.35299	1.54e-09	1.58e-08	LNA_down
ABLIM1	-0.638805	2.16e-05	0.000992632	4237.49	1.07311	4.55e-32	4.61e-30	LNA_down
THBS1	-0.282037	2.15e-05	0.000992632	43972.4	0.471557	4.78e-05	0.000240459	LNA_down
SREBF1	0.404841	2.14e-05	0.000992632	24860.9	0.182609	0.0171732	0.0439574	up_both
NCAPG	-0.454224	2.22e-05	0.00101343	1904.72	-0.947821	9.85e-18	2.71e-16	down_both
FAM50A	0.300867	2.3e-05	0.00104485	7563.69	0.220178	0.00110988	0.00403342	up_both
CACNG4	-0.26869	2.33e-05	0.00105337	36276	0.28074	7.53e-08	6.07e-07	LNA_down
RAMP3	-0.491681	2.48e-05	0.00111371	1109.93	-1.0585	0.000542316	0.00212644	down_both
ITFG1	-0.437955	2.62e-05	0.00116774	4537.76	0.252264	0.000253005	0.00106812	LNA_down
PLXNA1	-0.322378	2.62e-05	0.00116774	12414.7	0.464256	1.49e-09	1.53e-08	LNA_down
ABCD1	0.467015	2.63e-05	0.00116774	1596.82	-0.318116	0.00050547	0.00199553	LNA_up
NFKBIA	0.269874	2.66e-05	0.00117401	9292.06	0.403424	6.61e-10	7.13e-09	up_both
POF1B	0.475416	2.79e-05	0.00122028	3123.35	0.322806	2.67e-05	0.000140634	up_both
OXR1	-0.360269	3.04e-05	0.00131171	6358.66	-0.432816	2.61e-10	2.98e-09	down_both
RELB	0.571529	3.18e-05	0.00136448	332.748	1.28525	5.35e-14	9.66e-13	up_both
SLC4A10	0.642597	3.19e-05	0.00136448	390.567	-1.8274	2.16e-28	1.59e-26	LNA_up
IFI30	0.304266	3.4e-05	0.00144422	4108.62	-0.433749	0.00390477	0.0122509	LNA_up
PLXNB2	0.310448	3.41e-05	0.00144422	27608.7	0.260963	0.0032021	0.0103092	up_both
ZNF195	-0.507353	3.42e-05	0.00144516	1487.25	0.224653	0.00670514	0.0196722	LNA_down
HSPB8	0.228385	3.48e-05	0.00146287	1436.25	0.367155	0.00378204	0.0119397	up_both
ELK3	-0.599071	3.52e-05	0.00147741	1539.94	-0.628606	7.77e-12	1.08e-10	down_both
NUCKS1	-0.333284	3.6e-05	0.00150675	79376.4	-0.332495	0.000299656	0.00124466	down_both
NOCT	0.734124	3.74e-05	0.00155464	558.511	-0.290119	0.00796455	0.0228701	LNA_up
LAMB2	0.400274	3.83e-05	0.00158811	25568.1	-0.319766	8.97e-07	6.04e-06	LNA_up
IGSF1	0.406425	3.85e-05	0.00159006	193.513	-1.27334	3.44e-08	2.93e-07	LNA_up
SOD2	0.256053	3.91e-05	0.0016003	3150.29	-0.282249	0.000507591	0.00200343	LNA_up
OGFR	0.298318	4.12e-05	0.00166912	7197.46	0.227761	0.000950718	0.00351142	up_both
CCDC32	0.444964	4.25e-05	0.00171569	1878.91	-0.461667	1.76e-08	1.57e-07	LNA_up
AKR1A1	0.294077	4.26e-05	0.00171774	3973.2	-0.19666	0.00410176	0.0128065	LNA_up
PPP3CA	0.310782	4.41e-05	0.00177156	9689.55	0.334222	2.06e-07	1.55e-06	up_both
HERC6	0.272891	4.58e-05	0.0018272	2164.75	0.3946	0.000174051	0.000761301	up_both
NXPE3	0.38858	4.73e-05	0.00187795	2473.32	0.429715	7.75e-06	4.49e-05	up_both
CDH26	-0.59859	4.82e-05	0.00189954	76.4419	-0.782321	0.00320993	0.0103324	down_both
DUSP4	-0.627788	4.94e-05	0.00194217	5607.83	0.932486	1.65e-43	3.04e-41	LNA_down
CFDP1	-0.275367	5.09e-05	0.00198828	5337.12	-0.233581	0.000301914	0.00125342	down_both
EXOC6	0.453472	5.14e-05	0.00200378	2592.8	-0.483874	6.66e-08	5.42e-07	LNA_up
ICAM1	0.427082	5.17e-05	0.00200709	412.502	0.9461	9.83e-13	1.52e-11	up_both
CCDC91	-0.596814	5.36e-05	0.00206587	1309.93	0.423076	2.01e-05	0.000107904	LNA_down
DEPDC1	-0.434667	5.33e-05	0.00206587	1629.88	-1.04494	6.5e-12	9.15e-11	down_both
XYLT1	-0.788454	5.46e-05	0.00209712	1091.13	0.596816	1.94e-07	1.47e-06	LNA_down
C1QTNF6	0.366462	5.77e-05	0.00219813	1719.83	-1.20611	0.00115663	0.00418422	LNA_up
SDCBP	0.313708	6.16e-05	0.00233277	7530.66	0.200495	0.00573108	0.0171789	up_both
OLFM1	-0.33308	6.25e-05	0.00235991	3099.1	-0.8469	4.52e-20	1.59e-18	down_both
CRYBG1	0.381815	6.29e-05	0.0023679	9693.8	0.556143	6.23e-16	1.4e-14	up_both
SLC50A1	0.300449	6.87e-05	0.00253531	6197.24	-0.222285	0.00153805	0.00539042	LNA_up
GRIK3	-0.765552	7.09e-05	0.00260189	216.42	-0.952172	1.9e-08	1.68e-07	down_both
MAN2B1	0.371156	7.27e-05	0.00266025	4826.86	0.19475	0.0086969	0.0246641	up_both
AFF4	-0.224641	7.68e-05	0.00278917	17349.3	0.359998	0.000154265	0.000684418	LNA_down
PAICS	-0.248592	7.67e-05	0.00278917	9595.66	-0.724221	7.14e-28	4.94e-26	down_both
DNAJA4	0.297298	7.69e-05	0.00278917	2499.27	-0.181551	0.0144754	0.038041	LNA_up
GUCD1	0.265115	7.71e-05	0.00278918	5740.02	-0.640351	1.09e-16	2.69e-15	LNA_up
CENPE	-0.428132	8.1e-05	0.00292131	1419.48	-1.25156	1.45e-30	1.3e-28	down_both
ANLN	-0.289871	8.27e-05	0.00295261	8247.55	-0.680511	3.62e-11	4.62e-10	down_both
PSME2	0.258813	8.21e-05	0.00295261	7662.53	-0.517549	1.16e-17	3.17e-16	LNA_up
TRIM38	0.466507	8.27e-05	0.00295261	732.89	-0.866879	9.28e-13	1.44e-11	LNA_up
WWC3	0.312609	8.62e-05	0.00305819	4956.69	-0.478428	5.81e-05	0.0002862	LNA_up
TUBB3	-0.300767	8.89e-05	0.00314727	13966.7	0.703032	2.14e-24	1.11e-22	LNA_down
NDUFA10	-0.243746	9.55e-05	0.00335285	7217.8	-0.178814	0.00214141	0.00721639	down_both
STARD10	0.302147	9.61e-05	0.00335637	19314	-0.689978	3.6e-23	1.7e-21	LNA_up
PLEKHA7	-0.352108	9.82e-05	0.00341938	4022.46	0.366594	0.00169738	0.00589429	LNA_down
CCNB1	-0.255247	0.000107097	0.00369189	8894.22	-0.804787	2.75e-15	5.78e-14	down_both
CAV2	-0.748383	0.000109465	0.00374404	2686.88	1.00539	1.94e-15	4.14e-14	LNA_down
UBE2QL1	0.56415	0.00011181	0.00381432	2910.18	-0.578675	4.56e-12	6.55e-11	LNA_up
HS6ST3	-0.709953	0.000112805	0.00383829	6871.91	0.814051	3.38e-32	3.45e-30	LNA_down
FHL2	-0.393213	0.000115168	0.00390654	499.99	0.390025	0.000596728	0.00231753	LNA_down
HMGB1P5	-0.296236	0.000117873	0.00394934	3515.67	-0.266782	0.00703322	0.0205054	down_both
CEP55	-0.299192	0.000120208	0.00400714	2891.84	-1.17769	2.18e-23	1.06e-21	down_both
KIF13A	0.252048	0.00012122	0.00403065	6820.83	0.161542	0.0187588	0.0473569	up_both
RAPGEF1	-0.292525	0.000122754	0.00407135	10513.7	0.477102	1.09e-11	1.49e-10	LNA_down
SLC4A7	-0.299699	0.000126393	0.00415012	6792.75	0.252306	0.00739285	0.021427	LNA_down
PPIC	0.252437	0.000126375	0.00415012	10702.7	-0.211873	0.00578493	0.0173186	LNA_up
POLD3	-0.314436	0.000127992	0.00418172	1925.96	-0.430904	0.000276519	0.00115583	down_both
RAB4B	0.477746	0.000130474	0.00424169	1265.82	-0.318026	0.000286948	0.00119633	LNA_up
KIF23	-0.266328	0.000130911	0.00424538	4933.25	-0.840531	1.3e-17	3.51e-16	down_both
GNPNAT1	-0.279346	0.000132444	0.00427966	9067.35	-0.174127	0.00813976	0.0233052	down_both
MAGED1	0.27741	0.000132619	0.00427966	12313.9	-0.375857	1.76e-08	1.57e-07	LNA_up
MB21D2	0.35433	0.00013773	0.0044337	3696.31	0.769529	8.3e-25	4.51e-23	up_both
PRC1	-0.209495	0.000143997	0.00461281	10554.7	-1.06768	8.11e-18	2.26e-16	down_both
CHMP5	0.293017	0.000150162	0.00475235	7576.52	0.202133	0.0106393	0.0293664	up_both
SMYD3	-0.410374	0.000151258	0.00476408	2210.32	-0.297516	0.000390615	0.00158356	down_both
P3H4	0.437568	0.000151095	0.00476408	1512.01	0.38836	6.06e-06	3.57e-05	up_both
ANXA9	0.232671	0.000153263	0.0048157	3883.47	-0.832798	3.47e-08	2.95e-07	LNA_up
C3	0.370354	0.000156001	0.00489001	152.897	-0.926953	0.000165499	0.000728155	LNA_up
AHR	0.383158	0.000156732	0.00490123	10365.6	0.507558	8.62e-06	4.97e-05	up_both
CRISP3	1.21441	0.000157855	0.00492463	516.95	-0.666576	5.07e-08	4.22e-07	LNA_up
BTN2A2	0.684814	0.000160955	0.00500942	208.525	-0.436001	0.00847648	0.0241166	LNA_up
PCDH10	0.392509	0.000162831	0.00505585	13521.1	-0.389061	0.000301892	0.00125342	LNA_up
CSRP1	0.229374	0.000167688	0.00519438	23664.9	-0.649197	3.85e-18	1.13e-16	LNA_up
BLM	-0.323491	0.000171045	0.00526114	1318.17	-1.15854	1.43e-17	3.84e-16	down_both
LMNB1	-0.248792	0.000173904	0.00533657	12162.7	-1.01541	1.04e-16	2.57e-15	down_both
HMMR	-0.394728	0.000182421	0.00557192	2140.18	-1.245	2.75e-20	9.89e-19	down_both
GDAP1	0.365911	0.000184687	0.00561499	1166.7	-0.622638	2.03e-09	2.05e-08	LNA_up
GLB1L2	-0.497055	0.000195553	0.00586391	658.713	-0.499878	8.09e-06	4.68e-05	down_both
KIF5C	0.68459	0.000196391	0.00587563	2501.76	1.25766	3.96e-57	1.74e-54	up_both
KNL1	-0.328496	0.000196869	0.00587655	2084.71	-0.960735	2.9e-17	7.61e-16	down_both
ADAM9	-0.341494	0.000199345	0.00593697	9386.09	0.392006	0.000781702	0.00294767	LNA_down
DYNC1H1	0.206759	0.000200842	0.0059578	43796.4	0.646737	0.00441722	0.013669	up_both
DBN1	-0.290604	0.00020452	0.00603634	14506.2	0.957356	2.73e-45	5.64e-43	LNA_down
DEPTOR	-0.414438	0.000205193	0.00604262	900.819	-0.469758	1.36e-06	8.9e-06	down_both
AC009086.2	0.920033	0.000206698	0.00607332	743.899	-1.26946	1.34e-25	7.86e-24	LNA_up
KIF14	-0.293491	0.000218243	0.00635565	1669.88	-0.969139	1.78e-13	3.03e-12	down_both
RPS3A	-0.266705	0.000217872	0.00635565	73627.7	-0.182395	0.0124199	0.0334375	down_both
MYD88	0.244888	0.000228602	0.00662793	7458.72	0.155849	0.0190396	0.0479644	up_both
ASPM	-0.29504	0.000232631	0.0067299	3040.78	-0.523967	6.18e-05	0.000301496	down_both
NEBL	-0.329742	0.000234846	0.00677402	14748.7	0.327421	1.53e-06	9.9e-06	LNA_down
PARP12	0.300381	0.000236219	0.00677402	2476.47	0.854791	7.94e-33	8.58e-31	up_both
HIST2H3A	0.419276	0.000236049	0.00677402	1487.75	0.456123	0.00835861	0.0238339	up_both
BTN2A1	0.328792	0.000238995	0.00683608	1228.04	0.560599	1.04e-07	8.18e-07	up_both
TRIM26	0.236398	0.000257562	0.00730631	6535.79	-0.346649	3.61e-07	2.62e-06	LNA_up
AP001972.5	0.468497	0.000264062	0.00747454	835.943	-0.480996	0.00157543	0.00550758	LNA_up
MTHFD1	-0.20182	0.000265322	0.00749405	11296.6	-0.791425	3.86e-16	8.92e-15	down_both
UNK	-0.26809	0.000275072	0.00768679	3456.29	0.179776	0.0159946	0.041422	LNA_down
ABCB7	-0.413945	0.000282999	0.0078748	760.238	-0.364321	0.000331079	0.0013667	down_both
ZHX3	-0.283374	0.000282894	0.0078748	8379.91	-0.217568	0.00161444	0.00563573	down_both
ACOT2	0.395128	0.000289159	0.0080292	1488.29	-0.494875	8.01e-08	6.41e-07	LNA_up
JUP	0.266702	0.000295041	0.00817381	40750.3	-0.2214	0.000124163	0.000562193	LNA_up
TRIM21	0.360678	0.000304829	0.00839334	848.912	0.429777	7.64e-05	0.00036347	up_both
KRT19	0.206893	0.000318623	0.00866417	163547	-0.58692	4.93e-13	8e-12	LNA_up
KIF20A	-0.257746	0.000318438	0.00866417	4396.86	-1.06426	2.08e-13	3.52e-12	down_both
DDX60	0.307912	0.000326418	0.00883955	1777.3	0.858428	8.45e-09	7.85e-08	up_both
POLD2	-0.265835	0.00034823	0.00931498	5654.87	-0.677897	1.67e-24	8.88e-23	down_both
IFIT3	0.723892	0.000346968	0.00931498	578.714	0.757184	5.97e-05	0.0002928	up_both
WBP2	0.307123	0.000351419	0.0093432	8985.14	0.184033	0.0118295	0.0320854	up_both
TES	-0.437114	0.000352923	0.00936423	3807.43	0.386205	2.58e-06	1.62e-05	LNA_down
NEK6	-0.310732	0.000357914	0.00947751	5888.43	0.400178	1.42e-05	7.84e-05	LNA_down
KLF13	-0.711848	0.000365947	0.00965131	1597.19	0.292519	7.23e-05	0.000346753	LNA_down
NCAPG2	-0.234423	0.000367861	0.00968234	7839.76	-0.991122	1.59e-31	1.54e-29	down_both
TTF2	-0.281469	0.000380932	0.00996537	4335.78	-0.806425	3.05e-38	4.4e-36	down_both
EIF1AX	-0.242864	0.000380588	0.00996537	10252.7	-0.183393	0.0141101	0.037239	down_both
KIAA1683	0.538097	0.000382881	0.00996537	800.632	0.651342	1e-08	9.21e-08	up_both
TOM1	0.394026	0.000384906	0.00999082	2087.14	0.286349	0.000120924	0.000549161	up_both
IER3	0.276176	0.00038573	0.00999246	3455.59	-0.886467	7.06e-20	2.44e-18	LNA_up
SUCLG2	-0.271043	0.000410503	0.0104982	4319.78	-0.173933	0.0122996	0.033135	down_both
NUSAP1	-0.252648	0.000413246	0.0104982	4563.48	-0.971226	4.33e-14	7.96e-13	down_both
ATP6V0C	0.316969	0.000413071	0.0104982	13019.9	0.293856	0.00589865	0.0176401	up_both
PPP2R5B	0.618415	0.000417022	0.0105533	1172.04	0.789715	3.46e-11	4.43e-10	up_both
SDCBP2	1.29612	0.000426958	0.0107427	224.058	1.12976	1.66e-10	1.97e-09	up_both
ZNF217	-0.203989	0.000427952	0.0107471	100940	0.923048	2.23e-55	7.79e-53	LNA_down
GOLGA3	0.272804	0.000441389	0.0110423	8064.28	0.503768	5.77e-07	4.03e-06	up_both
MICAL2	-0.400866	0.000443203	0.0110476	2448.52	1.41226	1.56e-52	5.12e-50	LNA_down
FIGNL1	-0.304731	0.000443282	0.0110476	1943.81	-1.03663	2.52e-15	5.31e-14	down_both
FLT1	-0.961638	0.000450228	0.0111782	47.8363	0.949909	0.006412	0.0189384	LNA_down
MYBL1	-0.333369	0.000456171	0.0113044	678.817	-1.44972	8.79e-34	1.02e-31	down_both
PLXNA4	-0.848572	0.000461073	0.0113711	1685.22	0.554537	0.000391721	0.00158728	LNA_down
FAM72D	-0.405182	0.000462326	0.0113711	817.558	-0.85672	8.83e-13	1.38e-11	down_both
TNIP1	0.238359	0.000463301	0.0113738	6668.28	0.153008	0.0141463	0.0373227	up_both
DHCR7	0.289867	0.000476139	0.0116238	21648.6	-0.315843	0.000554907	0.00216971	LNA_up
HMGB2	-0.265806	0.000497422	0.0121137	10456.7	-0.968915	6.65e-13	1.05e-11	down_both
PXYLP1	-0.958879	0.000509844	0.0123094	409.075	0.372126	0.0125488	0.0337409	LNA_down
CABLES1	-0.365742	0.000521917	0.0125173	3079.9	0.447208	4.99e-12	7.14e-11	LNA_down
GSS	0.275959	0.000525888	0.0125354	4015.75	-0.201726	0.00366539	0.0116109	LNA_up
STAT6	0.365708	0.000527373	0.012548	1481.95	-0.678241	2e-09	2.02e-08	LNA_up
IDI1	0.267469	0.000534105	0.0126689	17365	-0.528356	9.87e-17	2.45e-15	LNA_up
AC239868.2	0.227946	0.000535345	0.0126689	7240.67	0.412436	1.71e-06	1.1e-05	up_both
METTL21A	-0.505757	0.000536873	0.0126822	757.378	-0.699955	2.5e-12	3.7e-11	down_both
ABCB6	0.321314	0.000538996	0.0127095	2568.98	0.268725	0.000664831	0.00254948	up_both
CADPS2	-0.437841	0.000546628	0.0128433	2866.27	-0.210499	0.0151875	0.0396509	down_both
RAD54B	-0.351094	0.000561277	0.0131405	1732.99	-0.807992	2.46e-17	6.49e-16	down_both
IGF2R	0.266733	0.000560404	0.0131405	15916.5	0.573391	8.8e-15	1.75e-13	up_both
FBXL17	-0.409614	0.000596529	0.0137453	4573.62	0.2661	0.00026789	0.00112303	LNA_down
AURKA	-0.223199	0.000594482	0.0137453	6386.5	-1.27963	2.43e-25	1.39e-23	down_both
BLNK	0.808921	0.000595551	0.0137453	597.064	-1.47914	7.92e-36	1.01e-33	LNA_up
CCL28	0.416324	0.000603121	0.0138486	365.749	-0.370265	0.00600746	0.0179079	LNA_up
MICB	0.306086	0.000613994	0.0140736	2909.06	-0.699465	4.47e-23	2.07e-21	LNA_up
ZFP36L1	-0.214249	0.000618932	0.0141375	15532.6	0.567843	1.63e-15	3.51e-14	LNA_down
NUP88	-0.269121	0.000652092	0.0148433	2501.64	-0.542278	6.09e-10	6.59e-09	down_both
ELF1	0.19886	0.000669134	0.0151763	11523.9	-0.267017	1.47e-05	8.14e-05	LNA_up
GINS2	-0.248578	0.00068049	0.01535	3968.8	-1.06567	1.62e-30	1.44e-28	down_both
SULT2B1	0.265129	0.000681365	0.01535	1799.68	-1.07487	8.99e-28	6.19e-26	LNA_up
NAGLU	0.30383	0.000679319	0.01535	2586.86	0.299147	0.000513635	0.00202544	up_both
RSAD2	0.720627	0.000727426	0.0163038	93.1119	0.917726	0.00015583	0.000690447	up_both
CLIP1	0.223097	0.000752654	0.0167833	6945.43	0.550912	6e-07	4.18e-06	up_both
GRK2	0.265511	0.0007555	0.0168182	10319.7	-0.151397	0.0105625	0.0291736	LNA_up
NECTIN4	0.465943	0.000760405	0.0168702	2651	0.29935	0.00197602	0.00673191	up_both
XAF1	0.426449	0.000774282	0.0170915	152.779	1.61381	6.91e-08	5.6e-07	up_both
PHF14	-0.266628	0.000787765	0.0173308	4436.77	-0.251062	0.000795595	0.00299332	down_both
TXLNG	-0.258973	0.000791312	0.0173797	2868.79	0.296025	0.00012612	0.000570593	LNA_down
SUSD1	0.426738	0.000794628	0.0173944	1930.93	0.656765	1.91e-20	6.98e-19	up_both
SC5D	0.457577	0.000793981	0.0173944	3848.97	-0.256823	0.00193667	0.00661298	LNA_up
WRB	-0.249374	0.000823291	0.0179322	4217.23	-0.29474	0.000196921	0.000851543	down_both
ATP5G1	-0.247346	0.000841428	0.0182365	2939.25	-0.589918	8.47e-11	1.03e-09	down_both
ZNF185	-0.278117	0.000845704	0.0182729	5254.92	-0.392351	1.11e-11	1.52e-10	down_both
PRRT3	0.361234	0.000859953	0.0184553	6028.48	0.220625	0.00149164	0.00524977	up_both
ZNF850	-0.826091	0.000867808	0.0185935	252.962	-0.821392	7.13e-07	4.9e-06	down_both
SKP2	-0.300713	0.000893347	0.0190129	996.129	-1.4545	4.1e-37	5.63e-35	down_both
PTCD3	-0.286745	0.000894622	0.0190129	3255.57	-0.412299	2.21e-09	2.22e-08	down_both
TFE3	0.236697	0.000908201	0.0192082	4743.81	0.279152	2.33e-05	0.000124049	up_both
HECW2	-0.488377	0.000917101	0.0193487	1740.19	0.269533	0.0104392	0.0288952	LNA_down
BARD1	-0.456984	0.000929736	0.0195691	2119.24	-0.984147	0.00109679	0.00398929	down_both
CAP2	0.324459	0.000937055	0.0196917	1641.6	-0.313773	0.00153003	0.00536681	LNA_up
TAP2	0.262879	0.000940318	0.0197287	2666.52	0.562158	5.38e-07	3.78e-06	up_both
MVD	0.271314	0.000965056	0.0200872	7460.82	-0.867294	4.72e-28	3.36e-26	LNA_up
BIRC6	0.206455	0.000964191	0.0200872	20733.9	0.639561	1.61e-08	1.44e-07	up_both
AL035661.1	0.459853	0.000970814	0.0201115	1935.68	-0.59147	5.82e-08	4.77e-07	LNA_up
TARSL2	-0.538871	0.000977044	0.0201664	946.847	0.463869	4.17e-07	2.99e-06	LNA_down
SMAP2	0.276832	0.000977851	0.0201664	2885.36	-0.347837	1.16e-06	7.69e-06	LNA_up
MKI67	-0.215389	0.000980647	0.0201878	14079.8	-0.995167	3.55e-16	8.29e-15	down_both
EEF1B2	-0.248728	0.000992759	0.0203746	18801	-0.413645	4.15e-10	4.61e-09	down_both
HID1	0.292097	0.00100355	0.0204986	10846.8	-0.640668	1.3e-22	5.84e-21	LNA_up
GLO1	-0.235176	0.00101033	0.0205731	10358.4	0.195358	0.00590263	0.0176469	LNA_down
CGN	0.288876	0.00104332	0.0211139	13687	0.3366	8.26e-08	6.6e-07	up_both
SEC24C	0.19253	0.00104516	0.0211186	12956.9	0.144571	0.0148737	0.0389533	up_both
GGH	-0.284746	0.00105323	0.0212489	1351.51	-0.580016	8e-07	5.44e-06	down_both
C3orf14	-0.261457	0.00105924	0.0213375	15826.8	-0.644834	3.08e-20	1.1e-18	down_both
BNIPL	0.684487	0.0010914	0.0219181	736.049	-2.51105	2.91e-72	2.37e-69	LNA_up
CD47	0.205169	0.00111155	0.0222886	18929.8	0.240829	0.000991057	0.00363793	up_both
CBX5	-0.211168	0.00113596	0.0226922	21057.6	-0.636851	6.9e-09	6.46e-08	down_both
CKMT1A	0.377598	0.00113685	0.0226922	2484.34	-0.985337	2.64e-12	3.89e-11	LNA_up
CYB5R1	0.275504	0.0011458	0.0228361	6059.23	-0.210253	0.00575148	0.0172277	LNA_up
LYPD1	-0.480773	0.00114911	0.0228674	4438.91	0.881347	1.01e-16	2.51e-15	LNA_down
RAB9A	0.350846	0.00115342	0.0228949	1931.82	0.340201	5.83e-05	0.000287046	up_both
EXO1	-0.356963	0.00115596	0.0228995	1131.8	-1.35786	6.65e-44	1.26e-41	down_both
ADAR	0.171744	0.00117763	0.0232936	36315.7	0.230833	1.61e-05	8.81e-05	up_both
TSKU	0.253625	0.00119121	0.0235268	3427.23	-0.84496	8.46e-19	2.65e-17	LNA_up
RB1CC1	-0.251476	0.00120163	0.0236615	5151.63	0.352861	0.000101578	0.000470237	LNA_down
PTPRG-AS1	-0.516801	0.00120788	0.023678	941.195	-0.955717	1.41e-16	3.46e-15	down_both
PPP1R15A	0.313846	0.00125299	0.0244892	1827.88	0.261555	0.000492437	0.00195098	up_both
TDRD7	0.239396	0.00126415	0.0246704	4465.62	0.349157	3.16e-07	2.31e-06	up_both
DCAF6	0.223796	0.00128462	0.024922	4357.95	-0.312692	6.06e-05	0.000296686	LNA_up
IFITM2	0.274862	0.00129579	0.0250279	2736.36	-0.5892	2.08e-09	2.09e-08	LNA_up
ATP2A3	0.329797	0.00129564	0.0250279	26415	-0.40052	1.41e-11	1.9e-10	LNA_up
FAM83D	-0.294088	0.00130273	0.0251249	1852.65	-1.39044	7.79e-22	3.23e-20	down_both
COPB2	0.211266	0.0013111	0.0251547	22705.2	-0.297665	1.32e-06	8.67e-06	LNA_up
SLC1A2	-0.547285	0.0013288	0.0254039	182.75	-1.44854	2.05e-08	1.8e-07	down_both
GABBR1	-1.10582	0.00133963	0.0255365	445.707	0.857665	8.57e-05	0.000402544	LNA_down
TUBGCP3	-0.305156	0.00133924	0.0255365	2599.66	-0.184215	0.00891367	0.0251977	down_both
AC106038.1	-0.531903	0.00134453	0.0255928	306.821	-2.09468	4.53e-28	3.24e-26	down_both
PMEPA1	-0.320457	0.00135651	0.0257219	28862	0.812272	4.38e-23	2.03e-21	LNA_down
RFC3	-0.25293	0.00135606	0.0257219	3477.47	-0.853138	4.53e-20	1.6e-18	down_both
SLC7A1	-0.205925	0.00136882	0.0258307	7241.7	-0.398113	4.92e-08	4.1e-07	down_both
DNAJA1	0.216645	0.00136719	0.0258307	26045.8	0.171184	0.00269793	0.00884077	up_both
SNHG19	-0.476784	0.00138669	0.0259883	583.604	-0.408435	0.00102715	0.00375887	down_both
VTCN1	0.417084	0.00138707	0.0259883	711.963	-0.336538	0.00369509	0.0117028	LNA_up
DIP2C	-0.271481	0.00142001	0.0265298	6045.83	0.381689	2.05e-06	1.3e-05	LNA_down
ATPAF2	0.334354	0.0014257	0.0265605	1138.48	-0.309237	0.000584225	0.00227372	LNA_up
PLPP1	0.693085	0.00142399	0.0265605	1510.1	1.00931	2.46e-21	9.56e-20	up_both
CDH3	0.1987	0.00143934	0.0267766	15182.7	0.231678	7.51e-05	0.00035821	up_both
MAP7D1	0.276362	0.00145773	0.0270804	3631.2	0.278223	0.000442651	0.00177092	up_both
MID2	0.384614	0.00147212	0.0272705	6133.62	0.196635	0.00049344	0.00195403	up_both
RPL7	-0.219051	0.00147992	0.0273764	57061.2	-0.28503	1.64e-07	1.25e-06	down_both
ERN1	0.248491	0.00148218	0.0273797	2239.56	0.401508	7.99e-08	6.4e-07	up_both
PPM1K	0.373241	0.00148495	0.0273923	1029.27	-1.49236	1.08e-23	5.31e-22	LNA_up
BCAP29	0.270144	0.00149634	0.0275637	5012.66	-0.173217	0.0169387	0.043537	LNA_up
TSPYL2	0.3757	0.00150292	0.0276075	3220.47	0.491134	2.16e-06	1.37e-05	up_both
E2F7	-0.333362	0.00150613	0.0276279	1423.37	-0.863649	1.54e-09	1.58e-08	down_both
ZNF681	-0.503087	0.0015148	0.0277481	556.974	0.46913	0.0158368	0.0410515	LNA_down
RFC5	-0.249173	0.00153407	0.0280619	1985.28	-0.400063	8.18e-05	0.000386022	down_both
HMGCR	0.256419	0.00153671	0.0280712	13365.7	-0.292151	2.91e-06	1.8e-05	LNA_up
TASP1	-0.3817	0.00154445	0.0281692	1135.16	-0.2401	0.0165227	0.0426118	down_both
SDC4	0.219064	0.00155178	0.0282287	18493.6	-0.353985	1.9e-10	2.23e-09	LNA_up
RABAC1	0.344878	0.00155592	0.0282648	2300.89	0.380492	6.19e-05	0.000301583	up_both
BOLA2-SMG1P6	-0.252997	0.00156598	0.02833	2571.57	-0.622351	8.11e-15	1.62e-13	down_both
ECT2	-0.226488	0.0015937	0.0285951	7954.73	-0.526725	6.33e-07	4.39e-06	down_both
NAA15	-0.27527	0.00159627	0.0286021	6251.13	0.173813	0.018036	0.0458433	LNA_down
FAM72A	-0.334009	0.00163639	0.0292016	789.026	-0.72655	3.4e-09	3.33e-08	down_both
CTSH	0.246144	0.00165028	0.0294095	7013.69	0.449282	4.29e-08	3.61e-07	up_both
POLR3G	-0.543062	0.00168543	0.0299142	342.583	-0.815562	5.34e-10	5.84e-09	down_both
RBM24	0.50041	0.00169287	0.0300055	44.8449	0.801817	0.0191252	0.0481655	up_both
NCDN	0.245727	0.00177707	0.031245	4640.51	-0.373559	4.28e-10	4.74e-09	LNA_up
ITGB5	0.280982	0.00178312	0.0313094	9089.09	-0.266247	9.79e-05	0.000454901	LNA_up
EFEMP1	0.37268	0.00178892	0.0313693	4495.36	-0.342827	0.00352612	0.0112207	LNA_up
MELK	-0.300127	0.00180948	0.0316454	2453.55	-1.00113	1.62e-21	6.48e-20	down_both
MTBP	-0.456024	0.00181292	0.0316634	345.608	-0.940257	1.39e-09	1.44e-08	down_both
PCDH1	0.373007	0.00184088	0.032024	4985.38	0.327625	4.98e-07	3.52e-06	up_both
RACGAP1	-0.214997	0.00186745	0.0324003	8395.59	-0.914284	1.02e-13	1.78e-12	down_both
ZC2HC1A	-0.501415	0.00187978	0.0324429	839.569	0.340983	0.000471815	0.00187683	LNA_down
BAG3	0.204076	0.00187859	0.0324429	13578.9	-1.04894	3.1e-51	9.1e-49	LNA_up
MRPS25	-0.219995	0.00191807	0.0328876	4536.65	-0.370979	1.32e-07	1.02e-06	down_both
RPL10A	-0.166818	0.00195279	0.0333957	32617.5	-0.276294	1.3e-05	7.24e-05	down_both
CENPJ	-0.430164	0.00199011	0.033849	927.309	-0.482046	0.000795998	0.00299416	down_both
CSE1L	-0.195095	0.0019893	0.033849	20509.8	-0.35617	3.97e-06	2.41e-05	down_both
PPL	0.247414	0.00199218	0.033849	19442.6	0.559705	3.76e-15	7.76e-14	up_both
TRAFD1	0.226074	0.00199588	0.03386	15711.9	-0.296847	0.000131709	0.00059283	LNA_up
PODXL2	-0.284468	0.00202472	0.0341809	4070.82	0.354399	1.37e-06	8.92e-06	LNA_down
RAB39B	0.426466	0.0020757	0.0349516	918.311	0.294739	0.00553275	0.0166502	up_both
NHS	-0.522155	0.00208851	0.0350517	1683.58	0.632638	3.18e-06	1.96e-05	LNA_down
FSTL3	-0.449892	0.0020872	0.0350517	1778.18	1.19794	3.33e-49	8.31e-47	LNA_down
PLEKHG4	-0.857888	0.00212702	0.0355503	249.96	0.603237	0.00537719	0.0162726	LNA_down
L2HGDH	-0.241444	0.00213021	0.0355503	2602.81	-0.835644	1.17e-17	3.17e-16	down_both
MRPS27	-0.20669	0.00212775	0.0355503	3937.13	-0.336938	1.06e-06	7.05e-06	down_both
INAVA	-0.470229	0.00214071	0.0356803	1089.3	0.74916	0.000114175	0.000521341	LNA_down
LDHD	0.410836	0.00214466	0.0357008	502.679	-0.483661	0.000105789	0.00048744	LNA_up
SBK1	-0.46674	0.0021582	0.0357451	3203.51	0.521342	1.55e-10	1.84e-09	LNA_down
PTGFRN	-0.244825	0.00215784	0.0357451	13706.1	0.57012	2.38e-23	1.15e-21	LNA_down
KIF2C	-0.257588	0.00215733	0.0357451	2790.82	-1.01019	7.58e-13	1.19e-11	down_both
RIMS4	-0.352747	0.00217694	0.0358745	1927.4	-0.221452	0.0168263	0.0432946	down_both
TMEM205	0.220728	0.00217645	0.0358745	9629.42	-0.449898	1.45e-05	8.01e-05	LNA_up
SLC37A1	0.25952	0.00218695	0.0359942	5781.97	-0.350742	2.48e-05	0.000131397	LNA_up
JAG2	-0.361108	0.00220527	0.0362046	3853.77	0.385997	1.87e-06	1.2e-05	LNA_down
DTX3L	0.204381	0.00222083	0.0363695	8311.93	0.52671	1.67e-15	3.58e-14	up_both
PCLAF	-0.229237	0.00222422	0.0363797	3709.9	-1.21672	8.44e-17	2.12e-15	down_both
SMC2	-0.251387	0.00223268	0.0364727	4270.26	-0.731347	2.78e-13	4.63e-12	down_both
RPS24	-0.189744	0.00225518	0.0367489	47508.3	-0.234969	0.000222053	0.000949182	down_both
TTC7A	-0.236472	0.00227466	0.0369744	3455.53	-0.167572	0.0143035	0.0376604	down_both
TIAM1	-0.505561	0.00229321	0.0372299	779.083	-0.961397	9.53e-18	2.63e-16	down_both
RUSC2	0.391931	0.00230283	0.03734	980.556	-0.65808	3.39e-14	6.34e-13	LNA_up
EP300	-0.201451	0.00232397	0.0376363	9134.86	0.346742	0.00061675	0.00238643	LNA_down
MAPK8IP2	0.546866	0.00232912	0.0376732	1137.57	-0.318391	0.00556062	0.0167128	LNA_up
UNG	-0.20425	0.00234136	0.0377318	6580.76	-0.752086	1.62e-22	7.17e-21	down_both
MCM7	-0.17114	0.00233898	0.0377318	18057.3	-0.916541	9.11e-22	3.77e-20	down_both
TXNDC15	0.366763	0.00233962	0.0377318	2445.34	0.240142	0.00108165	0.00393766	up_both
CARNMT1	-0.325169	0.00236177	0.0379082	1906.22	0.372114	0.000295233	0.00122842	LNA_down
FAM210B	-0.260947	0.00239645	0.038372	6642.16	0.794028	8.88e-30	7.32e-28	LNA_down
RORC	0.409059	0.00241114	0.0385203	545.533	-0.336699	0.00204828	0.00694728	LNA_up
ATPIF1	0.197058	0.00243148	0.0386623	6060.93	-0.278342	0.00364151	0.0115484	LNA_up
NEK2	-0.297841	0.00244382	0.0388115	890.123	-0.83241	6.68e-07	4.61e-06	down_both
CHDH	-0.320696	0.00246117	0.0390399	1374.92	-0.558087	6.4e-09	6.03e-08	down_both
MAPT	-0.260341	0.00247842	0.0392188	1677.18	-0.337188	0.000397073	0.00160624	down_both
P4HA2	0.27834	0.00248148	0.0392199	2487.67	0.669783	1.51e-13	2.6e-12	up_both
NGEF	0.818219	0.00249614	0.0393569	404.457	0.705654	2.81e-07	2.07e-06	up_both
BCL9	-0.339227	0.00254051	0.0399606	4170.85	-0.420448	4.19e-09	4.07e-08	down_both
C4orf46	-0.370081	0.00264439	0.0411654	989.692	-0.505076	8.22e-08	6.57e-07	down_both
HIST1H2AC	0.24992	0.0026372	0.0411654	10863.5	0.237773	0.000464047	0.00184857	up_both
MUC20	0.560221	0.00264532	0.0411654	2239.86	-0.497034	0.000406771	0.00164032	LNA_up
SLC39A10	-0.283376	0.00268876	0.0416441	3744.32	0.610928	3.04e-16	7.16e-15	LNA_down
IKBKE	0.277402	0.0026941	0.0416777	1064.09	-0.406773	0.00076016	0.00287486	LNA_up
MCM4	-0.170057	0.00270227	0.0417548	12159.2	-0.900108	5.16e-29	4e-27	down_both
RAPGEFL1	-0.303534	0.00271336	0.041877	623.408	-0.44996	4.19e-05	0.00021286	down_both
MLLT11	0.457095	0.002733	0.0420319	503.212	-0.48229	0.000106142	0.000488794	LNA_up
PTMA	-0.164862	0.00274827	0.0422173	106607	-0.258925	0.00924027	0.0259587	down_both
USP40	0.300442	0.00276597	0.0423406	3176.01	-0.272935	0.00916849	0.0257988	LNA_up
SPDEF	0.320101	0.00276546	0.0423406	9138.95	-0.963097	7.76e-44	1.46e-41	LNA_up
HLA-DRB1	0.316957	0.00277784	0.0424729	1322.64	-0.884295	8.59e-24	4.3e-22	LNA_up
SQLE	0.209304	0.00278538	0.0425385	25525.1	-0.46741	6.85e-11	8.5e-10	LNA_up
DSCC1	-0.27647	0.00281801	0.0429371	1273.23	-1.19782	2.17e-25	1.25e-23	down_both
HMGB1	-0.162529	0.00286023	0.043379	45340.9	-0.248655	0.0136053	0.0361061	down_both
SQOR	0.345956	0.00290508	0.0440085	1860.83	-0.395225	1.25e-05	6.97e-05	LNA_up
IPMK	-0.320793	0.00294452	0.044452	1045.61	0.41829	7.24e-05	0.000346869	LNA_down
CDKN3	-0.264137	0.00297103	0.0447495	1319.05	-1.34374	9.54e-24	4.74e-22	down_both
TMEM86A	0.841947	0.00297879	0.0448149	339.81	0.472599	0.00373088	0.0118005	up_both
CERS1	-0.513326	0.00300684	0.0451335	605.086	0.98414	2.03e-13	3.44e-12	LNA_down
SYBU	-0.35143	0.003013	0.0451743	1715.14	-0.911876	9.66e-18	2.66e-16	down_both
HSPH1	0.184198	0.00307541	0.0460051	23116.3	0.221304	5.79e-05	0.000285268	up_both
EPN3	0.320849	0.00312397	0.0466252	4659.4	-0.481989	1.31e-12	2e-11	LNA_up
LLGL2	0.222735	0.00314176	0.0468376	19600.2	-0.459891	3.08e-12	4.5e-11	LNA_up
ARID5B	0.280355	0.00314559	0.0468415	5447.85	0.355903	1.8e-07	1.37e-06	up_both
ATP6V0D1	0.191354	0.00316324	0.0468974	13316.7	-0.36273	9.3e-10	9.83e-09	LNA_up
SETBP1	-0.402352	0.00317264	0.046916	685.301	0.358704	0.00352682	0.0112208	LNA_down
ACP2	0.242638	0.00317917	0.046916	2204.29	-0.562171	3.06e-15	6.38e-14	LNA_up
GPSM2	-0.300614	0.00319345	0.0470738	4024.17	-0.978038	1.94e-17	5.17e-16	down_both
LINC00963	0.219273	0.00321697	0.0473143	5884.82	0.781256	1.67e-21	6.63e-20	up_both
MND1	-0.458451	0.00324408	0.0476596	334.209	-1.11604	1.42e-13	2.45e-12	down_both
PISD	0.262608	0.00330527	0.0483962	2458.47	-0.476771	6.05e-06	3.57e-05	LNA_up
GBF1	0.183164	0.00332331	0.0486062	8342.07	-0.213918	0.00429763	0.0133409	LNA_up
ACBD3	-0.212754	0.00332807	0.0486217	5535.6	0.464214	9.01e-14	1.59e-12	LNA_down
LRRN2	-0.714247	0.00334193	0.0487699	422.117	0.572308	3.97e-05	0.000202089	LNA_down
DHX33	-0.222292	0.00338231	0.049302	1695.45	-1.10407	6.15e-33	6.68e-31	down_both
STOX2	-0.739075	0.00339881	0.0493806	583.006	0.747277	4.25e-05	0.000215742	LNA_down

## Sheet: Legend
This table contains DE genes overlapping between LNA-DSCAM-AS1 (this study) and siRNA-ER experiment (Miano et al,. 2018)
header: self-explanatory
regulation: this column shows the direction of regulation of each gene in each experiment:
Down_both: this or those genes are downregulated in both datasets.
up_both: this or those genes are upregulated in both studies
LNA_up: this or those genes are upregulated in LNA-DSCAM-AS1 experiment, but downregulated in (siRNA-ER) experiment.
LNA_down: this or those genes are downregulated in LNA-DSCAM-AS1 experiment, but upregulated in (siRNA-ER) experiment.
