# Supplementary material
Source: Preprints.org preprint supplement (doi:10.20944/preprints202004.0323.v1)
Supplement: Supplementary file 1 [file supplementary › Supplementary_Table_5_GO_enrichment_analysis_of_overlapping_genes.xlsx]

## Sheet: Annotation_down_both
Input ID	Gene ID	Type	Tax ID	Homologene Gene ID	Homologene Gene Tax ID	GO:0000280 nuclear division	GO:0044770 cell cycle phase transition	GO:0071103 DNA conformation change	GO:0006260 DNA replication	GO:0008608 attachment of spindle microtub	GO:0044843 cell cycle G1/S phase transiti	GO:0051321 meiotic cell cycle	GO:0030261 chromosome condensation	GO:0071479 cellular response to ionizing	GO:0051383 kinetochore organization	GO:0006265 DNA topological change	GO:0051642 centrosome localization	GO:0031109 microtubule polymerization or	GO:0006412 translation	GO:0051782 negative regulation of cell di	GO:2001020 regulation of response to DNA	GO:2001236 regulation of extrinsic apopto	GO:0033138 positive regulation of peptidy	GO:0045859 regulation of protein kinase a	GO:0045931 positive regulation of mitotic
DSCAM-AS1	100506492	symbol	H. sapiens	100506492	H. sapiens	0.0	0.0	0.0	0.0	0.0	0.0	0.0	0.0	0.0	0.0	0.0	0.0	0.0	0.0	0.0	0.0	0.0	0.0	0.0	0.0
MAGI1	9223	symbol	H. sapiens	9223	H. sapiens	0.0	0.0	0.0	0.0	0.0	0.0	0.0	0.0	0.0	0.0	0.0	0.0	0.0	0.0	0.0	0.0	0.0	0.0	0.0	0.0
SPIDR	23514	symbol	H. sapiens	23514	H. sapiens	0.0	0.0	1.0	1.0	0.0	0.0	0.0	0.0	1.0	0.0	0.0	0.0	0.0	0.0	0.0	1.0	0.0	1.0	0.0	0.0
OXCT1	5019	symbol	H. sapiens	5019	H. sapiens	0.0	0.0	0.0	0.0	0.0	0.0	0.0	0.0	0.0	0.0	0.0	0.0	0.0	0.0	0.0	0.0	0.0	0.0	0.0	0.0
RET	5979	symbol	H. sapiens	5979	H. sapiens	0.0	0.0	0.0	0.0	0.0	1.0	0.0	0.0	0.0	0.0	0.0	0.0	0.0	0.0	0.0	0.0	1.0	1.0	1.0	0.0
ZNF850	342892	symbol	H. sapiens	342892	H. sapiens	0.0	0.0	0.0	0.0	0.0	0.0	0.0	0.0	0.0	0.0	0.0	0.0	0.0	0.0	0.0	0.0	0.0	0.0	0.0	0.0
FAM168A	23201	symbol	H. sapiens	23201	H. sapiens	0.0	0.0	1.0	1.0	0.0	0.0	0.0	0.0	0.0	0.0	0.0	0.0	0.0	0.0	0.0	1.0	0.0	0.0	0.0	0.0
CAV1	857	symbol	H. sapiens	857	H. sapiens	0.0	1.0	0.0	0.0	0.0	0.0	0.0	0.0	0.0	0.0	1.0	1.0	0.0	0.0	0.0	1.0	1.0	1.0	1.0	0.0
GRIK3	2899	symbol	H. sapiens	2899	H. sapiens	0.0	0.0	0.0	0.0	0.0	0.0	0.0	0.0	0.0	0.0	0.0	0.0	0.0	0.0	0.0	0.0	0.0	0.0	0.0	0.0
DLGAP5	9787	symbol	H. sapiens	9787	H. sapiens	1.0	1.0	0.0	0.0	1.0	0.0	0.0	0.0	0.0	0.0	0.0	0.0	0.0	0.0	0.0	0.0	0.0	0.0	0.0	1.0
SCFD2	152579	symbol	H. sapiens	152579	H. sapiens	1.0	0.0	0.0	0.0	0.0	0.0	0.0	0.0	0.0	0.0	0.0	0.0	0.0	0.0	0.0	0.0	0.0	0.0	0.0	0.0
METTL15	196074	symbol	H. sapiens	196074	H. sapiens	0.0	0.0	0.0	0.0	0.0	0.0	0.0	0.0	0.0	0.0	0.0	0.0	0.0	0.0	0.0	0.0	0.0	0.0	0.0	0.0
RAB3IP	117177	symbol	H. sapiens	117177	H. sapiens	1.0	0.0	0.0	0.0	0.0	0.0	0.0	0.0	0.0	0.0	0.0	0.0	0.0	0.0	0.0	0.0	0.0	0.0	0.0	0.0
SLC39A11	201266	symbol	H. sapiens	201266	H. sapiens	0.0	0.0	0.0	0.0	0.0	0.0	0.0	0.0	0.0	0.0	0.0	0.0	0.0	0.0	0.0	0.0	0.0	0.0	0.0	0.0
STMN3	50861	symbol	H. sapiens	50861	H. sapiens	1.0	0.0	0.0	0.0	0.0	0.0	0.0	0.0	0.0	0.0	0.0	0.0	1.0	0.0	0.0	0.0	0.0	0.0	1.0	0.0
ELK3	2004	symbol	H. sapiens	2004	H. sapiens	0.0	0.0	0.0	0.0	0.0	0.0	0.0	0.0	0.0	0.0	0.0	0.0	0.0	0.0	0.0	0.0	0.0	0.0	0.0	0.0
CDH26	60437	symbol	H. sapiens	60437	H. sapiens	0.0	0.0	0.0	0.0	0.0	0.0	0.0	0.0	0.0	0.0	0.0	0.0	0.0	0.0	0.0	0.0	0.0	0.0	0.0	0.0
GSTCD	79807	symbol	H. sapiens	79807	H. sapiens	0.0	0.0	0.0	0.0	0.0	0.0	0.0	0.0	0.0	0.0	0.0	0.0	0.0	0.0	0.0	0.0	0.0	0.0	0.0	0.0
SLC1A2	6506	symbol	H. sapiens	6506	H. sapiens	0.0	0.0	0.0	0.0	0.0	0.0	0.0	0.0	1.0	0.0	0.0	0.0	0.0	0.0	0.0	0.0	0.0	0.0	0.0	0.0
POLR3G	10622	symbol	H. sapiens	10622	H. sapiens	0.0	0.0	0.0	0.0	0.0	0.0	0.0	0.0	0.0	0.0	1.0	0.0	0.0	0.0	0.0	0.0	0.0	0.0	0.0	0.0
POLA1	5422	symbol	H. sapiens	5422	H. sapiens	0.0	1.0	1.0	1.0	0.0	1.0	0.0	0.0	1.0	0.0	0.0	0.0	0.0	0.0	0.0	0.0	0.0	0.0	0.0	0.0
AC106038.1						nan	nan	nan	nan	nan	nan	nan	nan	nan	nan	nan	nan	nan	nan	nan	nan	nan	nan	nan	nan
CA2	760	symbol	H. sapiens	760	H. sapiens	0.0	0.0	0.0	1.0	0.0	0.0	0.0	0.0	0.0	0.0	0.0	0.0	0.0	0.0	0.0	0.0	0.0	1.0	0.0	0.0
PTPRG-AS1	100506994	symbol	H. sapiens	100506994	H. sapiens	0.0	0.0	0.0	0.0	0.0	0.0	0.0	0.0	0.0	0.0	0.0	0.0	0.0	0.0	0.0	0.0	0.0	0.0	0.0	0.0
METTL21A	151194	symbol	H. sapiens	151194	H. sapiens	0.0	0.0	0.0	0.0	0.0	0.0	0.0	0.0	0.0	0.0	0.0	0.0	0.0	0.0	0.0	0.0	0.0	0.0	0.0	0.0
TIAM1	7074	symbol	H. sapiens	7074	H. sapiens	0.0	0.0	0.0	0.0	0.0	0.0	0.0	0.0	0.0	0.0	1.0	0.0	0.0	0.0	0.0	1.0	0.0	0.0	1.0	0.0
MYCBP	26292	symbol	H. sapiens	26292	H. sapiens	0.0	0.0	0.0	0.0	0.0	1.0	0.0	0.0	0.0	0.0	0.0	0.0	0.0	0.0	0.0	0.0	0.0	0.0	0.0	0.0
GLB1L2	89944	symbol	H. sapiens	89944	H. sapiens	0.0	0.0	0.0	0.0	0.0	0.0	0.0	0.0	0.0	0.0	0.0	0.0	0.0	0.0	0.0	0.0	0.0	0.0	0.0	0.0
RAMP3	10268	symbol	H. sapiens	10268	H. sapiens	0.0	0.0	0.0	0.0	0.0	0.0	0.0	0.0	0.0	0.0	0.0	1.0	0.0	0.0	0.0	0.0	0.0	1.0	0.0	0.0
SNHG19	100507303	symbol	H. sapiens	100507303	H. sapiens	0.0	0.0	0.0	0.0	0.0	0.0	0.0	0.0	0.0	0.0	0.0	0.0	0.0	0.0	0.0	0.0	0.0	0.0	0.0	0.0
DDIAS	220042	symbol	H. sapiens	220042	H. sapiens	0.0	1.0	0.0	0.0	0.0	1.0	0.0	0.0	0.0	0.0	0.0	0.0	0.0	0.0	0.0	1.0	1.0	0.0	0.0	0.0
NLN	57486	symbol	H. sapiens	57486	H. sapiens	0.0	0.0	0.0	0.0	0.0	0.0	0.0	0.0	0.0	0.0	0.0	0.0	0.0	0.0	0.0	0.0	0.0	0.0	0.0	0.0
NARS2	79731	symbol	H. sapiens	79731	H. sapiens	0.0	0.0	0.0	0.0	0.0	0.0	0.0	0.0	0.0	0.0	0.0	0.0	0.0	1.0	0.0	0.0	0.0	0.0	0.0	0.0
MND1	84057	symbol	H. sapiens	84057	H. sapiens	1.0	0.0	1.0	0.0	0.0	0.0	1.0	0.0	0.0	0.0	0.0	0.0	0.0	0.0	0.0	0.0	0.0	0.0	0.0	0.0
BARD1	580	symbol	H. sapiens	580	H. sapiens	0.0	1.0	1.0	1.0	0.0	1.0	0.0	0.0	0.0	0.0	0.0	1.0	0.0	0.0	0.0	0.0	0.0	0.0	0.0	0.0
MTBP	27085	symbol	H. sapiens	27085	H. sapiens	1.0	1.0	0.0	0.0	0.0	1.0	0.0	0.0	0.0	0.0	0.0	0.0	0.0	0.0	0.0	0.0	0.0	0.0	0.0	1.0
NCAPG	64151	symbol	H. sapiens	64151	H. sapiens	1.0	0.0	1.0	0.0	0.0	0.0	0.0	1.0	0.0	0.0	0.0	0.0	0.0	0.0	0.0	0.0	0.0	0.0	0.0	0.0
CADPS2	93664	symbol	H. sapiens	93664	H. sapiens	1.0	0.0	0.0	0.0	0.0	0.0	0.0	0.0	0.0	0.0	0.0	0.0	0.0	0.0	0.0	0.0	0.0	0.0	0.0	0.0
DEPDC1	55635	symbol	H. sapiens	55635	H. sapiens	0.0	0.0	0.0	0.0	0.0	0.0	0.0	0.0	0.0	0.0	0.0	0.0	0.0	0.0	0.0	0.0	0.0	0.0	0.0	0.0
BCL2	596	symbol	H. sapiens	596	H. sapiens	0.0	1.0	0.0	1.0	0.0	1.0	0.0	0.0	1.0	0.0	1.0	0.0	1.0	0.0	0.0	1.0	1.0	1.0	0.0	0.0
CENPJ	55835	symbol	H. sapiens	55835	H. sapiens	1.0	1.0	0.0	0.0	0.0	0.0	0.0	0.0	0.0	0.0	0.0	0.0	1.0	0.0	0.0	0.0	0.0	0.0	0.0	0.0
CENPE	1062	symbol	H. sapiens	1062	H. sapiens	1.0	1.0	0.0	0.0	1.0	0.0	0.0	0.0	0.0	1.0	1.0	0.0	0.0	0.0	0.0	0.0	0.0	0.0	1.0	0.0
PHKB	5257	symbol	H. sapiens	5257	H. sapiens	0.0	0.0	0.0	0.0	0.0	0.0	0.0	0.0	0.0	0.0	0.0	0.0	0.0	0.0	0.0	0.0	0.0	0.0	0.0	0.0
GRB2	2885	symbol	H. sapiens	2885	H. sapiens	0.0	0.0	0.0	0.0	0.0	1.0	0.0	0.0	1.0	0.0	0.0	0.0	1.0	0.0	0.0	0.0	0.0	1.0	1.0	0.0
DEPTOR	64798	symbol	H. sapiens	64798	H. sapiens	0.0	0.0	0.0	0.0	0.0	0.0	0.0	0.0	0.0	0.0	0.0	0.0	0.0	0.0	0.0	0.0	1.0	0.0	1.0	0.0
ABCB7	22	symbol	H. sapiens	22	H. sapiens	0.0	0.0	0.0	0.0	0.0	0.0	0.0	0.0	0.0	0.0	0.0	0.0	0.0	0.0	0.0	0.0	0.0	0.0	0.0	0.0
SMYD3	64754	symbol	H. sapiens	64754	H. sapiens	0.0	0.0	1.0	0.0	0.0	0.0	0.0	1.0	0.0	0.0	1.0	0.0	0.0	0.0	0.0	0.0	0.0	1.0	1.0	0.0
FAM72D	728833	symbol	H. sapiens	728833	H. sapiens	0.0	0.0	0.0	0.0	0.0	0.0	0.0	0.0	0.0	0.0	0.0	0.0	0.0	0.0	0.0	0.0	0.0	0.0	0.0	0.0
JARID2	3720	symbol	H. sapiens	3720	H. sapiens	0.0	1.0	0.0	0.0	0.0	0.0	0.0	0.0	0.0	0.0	1.0	0.0	0.0	0.0	0.0	0.0	0.0	0.0	0.0	1.0
HMMR	3161	symbol	H. sapiens	3161	H. sapiens	0.0	1.0	0.0	0.0	0.0	0.0	0.0	0.0	0.0	0.0	0.0	0.0	0.0	0.0	0.0	0.0	0.0	0.0	0.0	0.0
CMSS1	84319	symbol	H. sapiens	84319	H. sapiens	0.0	0.0	0.0	0.0	0.0	0.0	0.0	0.0	0.0	0.0	0.0	0.0	0.0	0.0	0.0	0.0	0.0	0.0	0.0	0.0
TASP1	55617	symbol	H. sapiens	55617	H. sapiens	0.0	0.0	0.0	0.0	0.0	0.0	0.0	0.0	0.0	0.0	0.0	0.0	0.0	0.0	0.0	0.0	0.0	0.0	0.0	0.0
TRIP13	9319	symbol	H. sapiens	9319	H. sapiens	1.0	1.0	1.0	0.0	0.0	1.0	1.0	1.0	0.0	0.0	0.0	0.0	0.0	0.0	0.0	0.0	0.0	0.0	0.0	0.0
FAF1	11124	symbol	H. sapiens	11124	H. sapiens	0.0	0.0	0.0	1.0	0.0	0.0	0.0	0.0	0.0	0.0	0.0	0.0	0.0	0.0	0.0	0.0	1.0	0.0	1.0	0.0
PRR11	55771	symbol	H. sapiens	55771	H. sapiens	0.0	1.0	0.0	0.0	0.0	1.0	0.0	0.0	0.0	0.0	0.0	0.0	0.0	0.0	0.0	0.0	0.0	0.0	0.0	0.0
C4orf46	201725	symbol	H. sapiens	201725	H. sapiens	0.0	0.0	0.0	0.0	0.0	0.0	0.0	0.0	0.0	0.0	0.0	0.0	0.0	0.0	0.0	0.0	0.0	0.0	0.0	0.0
SMC4	10051	symbol	H. sapiens	10051	H. sapiens	1.0	0.0	1.0	0.0	0.0	0.0	1.0	1.0	0.0	1.0	0.0	0.0	0.0	0.0	0.0	0.0	0.0	0.0	0.0	0.0
TYMS	7298	symbol	H. sapiens	7298	H. sapiens	0.0	1.0	0.0	1.0	0.0	1.0	0.0	0.0	0.0	0.0	0.0	0.0	0.0	1.0	0.0	0.0	0.0	1.0	0.0	0.0
OXR1	55074	symbol	H. sapiens	55074	H. sapiens	0.0	0.0	0.0	0.0	0.0	0.0	0.0	0.0	0.0	0.0	0.0	0.0	0.0	0.0	0.0	1.0	0.0	0.0	0.0	0.0
FANCI	55215	symbol	H. sapiens	55215	H. sapiens	0.0	0.0	1.0	0.0	0.0	0.0	0.0	0.0	0.0	0.0	0.0	0.0	0.0	0.0	0.0	0.0	0.0	0.0	0.0	0.0
EXO1	9156	symbol	H. sapiens	9156	H. sapiens	0.0	0.0	1.0	1.0	0.0	0.0	1.0	0.0	0.0	0.0	1.0	0.0	0.0	0.0	0.0	0.0	0.0	0.0	0.0	0.0
DARS2	55157	symbol	H. sapiens	55157	H. sapiens	0.0	0.0	0.0	0.0	0.0	0.0	0.0	0.0	0.0	0.0	0.0	0.0	0.0	1.0	0.0	0.0	0.0	0.0	0.0	0.0
RIMS4	140730	symbol	H. sapiens	140730	H. sapiens	1.0	0.0	0.0	0.0	0.0	0.0	0.0	0.0	0.0	0.0	0.0	0.0	0.0	0.0	0.0	0.0	0.0	0.0	0.0	0.0
SYBU	55638	symbol	H. sapiens	55638	H. sapiens	1.0	0.0	0.0	0.0	1.0	1.0	0.0	0.0	0.0	0.0	0.0	0.0	0.0	0.0	0.0	0.0	0.0	0.0	0.0	0.0
RAD54B	25788	symbol	H. sapiens	25788	H. sapiens	1.0	0.0	1.0	0.0	0.0	0.0	1.0	0.0	0.0	0.0	0.0	0.0	0.0	0.0	0.0	0.0	0.0	0.0	0.0	0.0
MAD2L1	4085	symbol	H. sapiens	4085	H. sapiens	1.0	1.0	0.0	0.0	0.0	1.0	0.0	0.0	0.0	0.0	0.0	1.0	0.0	0.0	0.0	0.0	0.0	0.0	0.0	1.0
RBM3	5935	symbol	H. sapiens	5935	H. sapiens	0.0	0.0	0.0	0.0	0.0	0.0	0.0	0.0	0.0	0.0	0.0	0.0	0.0	1.0	0.0	0.0	0.0	0.0	0.0	0.0
BCL9	607	symbol	H. sapiens	607	H. sapiens	0.0	0.0	0.0	0.0	0.0	1.0	0.0	0.0	0.0	0.0	0.0	0.0	0.0	0.0	0.0	0.0	0.0	0.0	0.0	0.0
UCK2	7371	symbol	H. sapiens	7371	H. sapiens	0.0	0.0	0.0	0.0	0.0	0.0	0.0	0.0	0.0	0.0	0.0	0.0	0.0	0.0	0.0	0.0	0.0	0.0	0.0	0.0
TOP2A	7153	symbol	H. sapiens	7153	H. sapiens	1.0	1.0	1.0	0.0	0.0	1.0	1.0	1.0	0.0	0.0	1.0	0.0	0.0	0.0	0.0	0.0	0.0	0.0	0.0	0.0
FAM72A	729533	symbol	H. sapiens	729533	H. sapiens	0.0	0.0	0.0	0.0	0.0	0.0	0.0	0.0	0.0	0.0	0.0	0.0	0.0	0.0	0.0	0.0	0.0	0.0	0.0	0.0
CENPF	1063	symbol	H. sapiens	1063	H. sapiens	1.0	1.0	0.0	1.0	0.0	0.0	0.0	0.0	0.0	1.0	1.0	0.0	0.0	0.0	0.0	0.0	0.0	0.0	0.0	0.0
MYBL1	4603	symbol	H. sapiens	4603	H. sapiens	1.0	0.0	0.0	0.0	0.0	1.0	1.0	0.0	0.0	0.0	0.0	0.0	0.0	0.0	0.0	0.0	0.0	0.0	0.0	0.0
E2F7	144455	symbol	H. sapiens	144455	H. sapiens	1.0	1.0	0.0	1.0	1.0	1.0	0.0	0.0	0.0	0.0	0.0	0.0	0.0	0.0	1.0	0.0	0.0	0.0	0.0	0.0
NUCKS1	64710	symbol	H. sapiens	64710	H. sapiens	0.0	0.0	1.0	1.0	0.0	0.0	0.0	0.0	1.0	0.0	1.0	0.0	0.0	0.0	0.0	0.0	0.0	1.0	0.0	0.0
OLFM1	10439	symbol	H. sapiens	10439	H. sapiens	0.0	0.0	0.0	0.0	0.0	0.0	0.0	0.0	0.0	0.0	0.0	0.0	0.0	0.0	0.0	0.0	0.0	0.0	0.0	0.0
CCNA2	890	symbol	H. sapiens	890	H. sapiens	1.0	1.0	0.0	1.0	0.0	1.0	0.0	0.0	0.0	0.0	0.0	0.0	0.0	0.0	0.0	0.0	0.0	1.0	1.0	0.0
KNL1	57082	symbol	H. sapiens	57082	H. sapiens	1.0	0.0	1.0	0.0	1.0	1.0	0.0	1.0	0.0	1.0	1.0	0.0	0.0	0.0	0.0	0.0	0.0	0.0	0.0	0.0
BLM	641	symbol	H. sapiens	641	H. sapiens	1.0	1.0	1.0	1.0	1.0	1.0	0.0	0.0	1.0	0.0	0.0	0.0	0.0	0.0	1.0	0.0	0.0	1.0	1.0	0.0
PDZK1	5174	symbol	H. sapiens	5174	H. sapiens	0.0	0.0	0.0	0.0	0.0	0.0	0.0	0.0	0.0	0.0	0.0	0.0	0.0	0.0	0.0	0.0	0.0	0.0	0.0	0.0
CHDH	55349	symbol	H. sapiens	55349	H. sapiens	0.0	0.0	0.0	0.0	0.0	0.0	0.0	0.0	0.0	0.0	0.0	0.0	0.0	0.0	0.0	0.0	0.0	0.0	0.0	0.0
POLD3	10714	symbol	H. sapiens	10714	H. sapiens	0.0	0.0	1.0	1.0	0.0	0.0	0.0	0.0	1.0	0.0	0.0	0.0	0.0	0.0	0.0	0.0	0.0	0.0	0.0	0.0
QSER1	79832	symbol	H. sapiens	79832	H. sapiens	0.0	0.0	0.0	0.0	0.0	0.0	0.0	0.0	0.0	0.0	0.0	0.0	0.0	0.0	0.0	0.0	0.0	0.0	0.0	0.0
TUBGCP3	10426	symbol	H. sapiens	10426	H. sapiens	1.0	0.0	0.0	0.0	0.0	0.0	1.0	0.0	0.0	0.0	0.0	0.0	1.0	0.0	0.0	0.0	0.0	0.0	0.0	0.0
FIGNL1	63979	symbol	H. sapiens	63979	H. sapiens	1.0	0.0	1.0	1.0	0.0	1.0	1.0	0.0	1.0	0.0	0.0	0.0	1.0	0.0	0.0	1.0	1.0	0.0	0.0	0.0
RAPGEFL1	51195	symbol	H. sapiens	51195	H. sapiens	0.0	0.0	0.0	0.0	0.0	0.0	0.0	0.0	0.0	0.0	0.0	0.0	0.0	0.0	0.0	0.0	0.0	0.0	1.0	0.0
SKP2	6502	symbol	H. sapiens	6502	H. sapiens	0.0	1.0	0.0	0.0	0.0	1.0	0.0	0.0	0.0	0.0	0.0	0.0	0.0	0.0	0.0	0.0	0.0	1.0	0.0	0.0
GPSM2	29899	symbol	H. sapiens	29899	H. sapiens	1.0	1.0	0.0	0.0	0.0	0.0	0.0	0.0	0.0	0.0	0.0	1.0	0.0	0.0	0.0	0.0	0.0	0.0	1.0	0.0
MELK	9833	symbol	H. sapiens	9833	H. sapiens	0.0	1.0	0.0	0.0	0.0	0.0	0.0	0.0	0.0	0.0	0.0	0.0	0.0	0.0	0.0	0.0	1.0	0.0	0.0	0.0
CEP55	55165	symbol	H. sapiens	55165	H. sapiens	1.0	0.0	0.0	0.0	1.0	0.0	0.0	0.0	0.0	0.0	0.0	0.0	0.0	0.0	0.0	0.0	0.0	0.0	0.0	0.0
NEK2	4751	symbol	H. sapiens	4751	H. sapiens	1.0	1.0	0.0	1.0	1.0	0.0	1.0	0.0	0.0	0.0	1.0	0.0	0.0	0.0	0.0	0.0	0.0	0.0	1.0	1.0
HMGB1P5	10354	symbol	H. sapiens	10354	H. sapiens	0.0	0.0	0.0	0.0	0.0	0.0	0.0	0.0	0.0	0.0	0.0	0.0	0.0	0.0	0.0	0.0	0.0	0.0	0.0	0.0
ASPM	259266	symbol	H. sapiens	259266	H. sapiens	1.0	0.0	0.0	0.0	1.0	1.0	1.0	0.0	0.0	0.0	0.0	1.0	0.0	0.0	1.0	0.0	0.0	0.0	0.0	0.0
FAM83D	81610	symbol	H. sapiens	81610	H. sapiens	1.0	1.0	0.0	0.0	0.0	1.0	0.0	0.0	0.0	0.0	0.0	0.0	0.0	0.0	0.0	0.0	0.0	0.0	0.0	1.0
KIF14	9928	symbol	H. sapiens	9928	H. sapiens	1.0	1.0	0.0	0.0	1.0	1.0	0.0	0.0	0.0	0.0	0.0	0.0	1.0	0.0	0.0	0.0	0.0	0.0	1.0	0.0
ANLN	54443	symbol	H. sapiens	54443	H. sapiens	1.0	1.0	0.0	0.0	1.0	0.0	0.0	0.0	0.0	0.0	0.0	1.0	0.0	0.0	0.0	0.0	0.0	0.0	0.0	0.0
PTCD3	55037	symbol	H. sapiens	55037	H. sapiens	0.0	0.0	0.0	0.0	0.0	0.0	0.0	0.0	0.0	0.0	0.0	0.0	0.0	1.0	0.0	0.0	0.0	0.0	0.0	0.0
GGH	8836	symbol	H. sapiens	8836	H. sapiens	0.0	0.0	0.0	0.0	0.0	0.0	0.0	0.0	0.0	0.0	0.0	0.0	0.0	0.0	0.0	0.0	0.0	1.0	0.0	0.0
ZHX3	23051	symbol	H. sapiens	23051	H. sapiens	0.0	0.0	0.0	0.0	0.0	0.0	0.0	0.0	0.0	0.0	0.0	0.0	0.0	0.0	0.0	0.0	0.0	0.0	0.0	0.0
SND1	27044	symbol	H. sapiens	27044	H. sapiens	0.0	1.0	0.0	1.0	0.0	0.0	0.0	0.0	0.0	0.0	0.0	0.0	0.0	0.0	0.0	0.0	0.0	0.0	0.0	0.0
TTF2	8458	symbol	H. sapiens	8458	H. sapiens	0.0	0.0	0.0	0.0	0.0	0.0	0.0	0.0	0.0	0.0	0.0	0.0	0.0	0.0	0.0	0.0	0.0	0.0	0.0	0.0
GNPNAT1	64841	symbol	H. sapiens	64841	H. sapiens	0.0	0.0	0.0	0.0	0.0	0.0	0.0	0.0	0.0	0.0	0.0	0.0	0.0	0.0	0.0	0.0	0.0	0.0	0.0	0.0
ZNF185	7739	symbol	H. sapiens	7739	H. sapiens	0.0	0.0	0.0	0.0	0.0	0.0	0.0	0.0	0.0	0.0	0.0	0.0	0.0	0.0	0.0	0.0	0.0	0.0	0.0	0.0
DSCC1	79075	symbol	H. sapiens	79075	H. sapiens	1.0	0.0	1.0	1.0	0.0	0.0	0.0	0.0	0.0	0.0	0.0	0.0	0.0	0.0	0.0	0.0	0.0	0.0	1.0	0.0
CFDP1	10428	symbol	H. sapiens	10428	H. sapiens	0.0	0.0	0.0	0.0	0.0	0.0	0.0	0.0	0.0	0.0	0.0	0.0	0.0	0.0	0.0	0.0	0.0	0.0	0.0	0.0
SUCLG2	8801	symbol	H. sapiens	8801	H. sapiens	0.0	0.0	0.0	0.0	0.0	0.0	0.0	0.0	0.0	0.0	0.0	0.0	0.0	0.0	0.0	0.0	0.0	0.0	0.0	0.0
NOP56	10528	symbol	H. sapiens	10528	H. sapiens	0.0	0.0	0.0	0.0	0.0	0.0	0.0	0.0	0.0	0.0	0.0	0.0	0.0	0.0	0.0	0.0	0.0	0.0	0.0	0.0
NUP88	4927	symbol	H. sapiens	4927	H. sapiens	1.0	0.0	0.0	0.0	0.0	0.0	0.0	0.0	0.0	0.0	0.0	0.0	0.0	0.0	0.0	1.0	0.0	0.0	0.0	0.0
RPS3A	6189	symbol	H. sapiens	6189	H. sapiens	0.0	0.0	0.0	0.0	0.0	0.0	0.0	0.0	0.0	0.0	0.0	0.0	0.0	1.0	0.0	0.0	0.0	0.0	0.0	0.0
PHF14	9678	symbol	H. sapiens	9678	H. sapiens	0.0	0.0	0.0	0.0	0.0	0.0	0.0	0.0	0.0	0.0	0.0	0.0	0.0	0.0	0.0	0.0	0.0	0.0	0.0	0.0
KIF23	9493	symbol	H. sapiens	9493	H. sapiens	1.0	1.0	0.0	0.0	1.0	0.0	0.0	0.0	0.0	0.0	0.0	0.0	0.0	0.0	0.0	0.0	0.0	0.0	0.0	0.0
POLD2	5425	symbol	H. sapiens	5425	H. sapiens	0.0	0.0	1.0	1.0	0.0	0.0	0.0	0.0	0.0	0.0	0.0	0.0	0.0	0.0	0.0	0.0	0.0	0.0	0.0	0.0
HMGB2	3148	symbol	H. sapiens	3148	H. sapiens	0.0	0.0	1.0	1.0	0.0	1.0	0.0	1.0	0.0	0.0	1.0	0.0	0.0	0.0	0.0	0.0	1.0	1.0	0.0	0.0
CDKN3	1033	symbol	H. sapiens	1033	H. sapiens	0.0	1.0	0.0	0.0	0.0	1.0	0.0	0.0	0.0	0.0	0.0	0.0	0.0	0.0	0.0	0.0	0.0	0.0	1.0	0.0
C3orf14	57415	symbol	H. sapiens	57415	H. sapiens	0.0	0.0	0.0	0.0	0.0	0.0	0.0	0.0	0.0	0.0	0.0	0.0	0.0	0.0	0.0	0.0	0.0	0.0	0.0	0.0
MAPT	4137	symbol	H. sapiens	4137	H. sapiens	1.0	1.0	0.0	0.0	1.0	0.0	0.0	0.0	0.0	0.0	0.0	0.0	1.0	0.0	0.0	1.0	0.0	1.0	1.0	0.0
KIF20A	10112	symbol	H. sapiens	10112	H. sapiens	1.0	1.0	0.0	0.0	1.0	0.0	0.0	0.0	0.0	0.0	0.0	0.0	0.0	0.0	0.0	0.0	0.0	0.0	0.0	0.0
KIF2C	11004	symbol	H. sapiens	11004	H. sapiens	1.0	1.0	0.0	0.0	1.0	0.0	0.0	0.0	0.0	0.0	0.0	0.0	1.0	0.0	0.0	0.0	0.0	0.0	0.0	0.0
CCNB1	891	symbol	H. sapiens	891	H. sapiens	1.0	1.0	1.0	1.0	1.0	1.0	0.0	1.0	0.0	0.0	0.0	0.0	0.0	0.0	0.0	0.0	0.0	1.0	1.0	1.0
BOLA2-SMG1P6	107282092	symbol	H. sapiens	107282092	H. sapiens	0.0	0.0	0.0	0.0	0.0	0.0	0.0	0.0	0.0	0.0	0.0	0.0	0.0	0.0	0.0	0.0	0.0	0.0	0.0	0.0
RFC3	5983	symbol	H. sapiens	5983	H. sapiens	0.0	0.0	1.0	1.0	0.0	0.0	0.0	0.0	0.0	0.0	0.0	0.0	0.0	0.0	0.0	0.0	0.0	0.0	1.0	0.0
NUSAP1	51203	symbol	H. sapiens	51203	H. sapiens	1.0	1.0	1.0	0.0	1.0	0.0	0.0	1.0	0.0	0.0	0.0	1.0	0.0	0.0	0.0	0.0	0.0	0.0	0.0	1.0
SMC2	10592	symbol	H. sapiens	10592	H. sapiens	1.0	0.0	1.0	0.0	0.0	0.0	1.0	1.0	0.0	1.0	0.0	0.0	0.0	0.0	0.0	0.0	0.0	0.0	0.0	0.0
WRB	7485	gene_synonym	H. sapiens	7485	H. sapiens	0.0	0.0	0.0	0.0	0.0	0.0	0.0	0.0	0.0	0.0	0.0	0.0	0.0	0.0	0.0	0.0	0.0	0.0	0.0	0.0
RFC5	5985	symbol	H. sapiens	5985	H. sapiens	0.0	0.0	1.0	1.0	0.0	0.0	0.0	0.0	0.0	0.0	0.0	0.0	0.0	0.0	0.0	0.0	0.0	0.0	1.0	0.0
LMNB1	4001	symbol	H. sapiens	4001	H. sapiens	0.0	0.0	0.0	0.0	0.0	0.0	0.0	0.0	0.0	0.0	0.0	0.0	0.0	0.0	0.0	0.0	0.0	0.0	0.0	0.0
EEF1B2	1933	symbol	H. sapiens	1933	H. sapiens	0.0	0.0	0.0	0.0	0.0	0.0	0.0	0.0	0.0	0.0	0.0	0.0	0.0	1.0	0.0	0.0	0.0	0.0	0.0	0.0
PAICS	10606	symbol	H. sapiens	10606	H. sapiens	0.0	0.0	0.0	0.0	0.0	0.0	0.0	0.0	0.0	0.0	0.0	0.0	0.0	0.0	0.0	0.0	0.0	0.0	0.0	0.0
GINS2	51659	symbol	H. sapiens	51659	H. sapiens	0.0	0.0	1.0	1.0	0.0	0.0	0.0	0.0	0.0	0.0	0.0	0.0	0.0	0.0	0.0	0.0	0.0	0.0	0.0	0.0
ATP5G1	516	gene_synonym	H. sapiens	516	H. sapiens	0.0	0.0	0.0	0.0	0.0	0.0	0.0	0.0	0.0	0.0	0.0	0.0	0.0	0.0	0.0	0.0	0.0	0.0	0.0	0.0
NDUFA10	4705	symbol	H. sapiens	4705	H. sapiens	0.0	0.0	0.0	0.0	0.0	0.0	0.0	0.0	0.0	0.0	0.0	0.0	0.0	0.0	0.0	0.0	0.0	0.0	0.0	0.0
EIF1AX	1964	symbol	H. sapiens	1964	H. sapiens	0.0	0.0	0.0	0.0	0.0	0.0	0.0	0.0	0.0	0.0	0.0	0.0	0.0	1.0	0.0	0.0	0.0	0.0	0.0	0.0
L2HGDH	79944	symbol	H. sapiens	79944	H. sapiens	0.0	0.0	0.0	0.0	0.0	0.0	0.0	0.0	0.0	0.0	0.0	0.0	0.0	0.0	0.0	0.0	0.0	0.0	0.0	0.0
TTC7A	57217	symbol	H. sapiens	57217	H. sapiens	0.0	0.0	0.0	0.0	0.0	0.0	0.0	0.0	0.0	0.0	0.0	1.0	0.0	0.0	0.0	0.0	0.0	0.0	0.0	0.0
NCAPG2	54892	symbol	H. sapiens	54892	H. sapiens	1.0	0.0	1.0	0.0	0.0	0.0	0.0	1.0	0.0	0.0	1.0	0.0	0.0	0.0	0.0	0.0	0.0	0.0	1.0	0.0
PCLAF	9768	symbol	H. sapiens	9768	H. sapiens	1.0	0.0	1.0	1.0	0.0	0.0	0.0	0.0	1.0	0.0	0.0	0.0	0.0	0.0	0.0	0.0	0.0	0.0	0.0	0.0
ECT2	1894	symbol	H. sapiens	1894	H. sapiens	1.0	1.0	0.0	0.0	1.0	0.0	0.0	0.0	1.0	0.0	0.0	0.0	0.0	0.0	0.0	0.0	0.0	1.0	1.0	0.0
AURKA	6790	symbol	H. sapiens	6790	H. sapiens	1.0	1.0	0.0	1.0	1.0	1.0	1.0	0.0	0.0	0.0	1.0	1.0	0.0	0.0	0.0	0.0	0.0	1.0	0.0	1.0
DHX33	56919	symbol	H. sapiens	56919	H. sapiens	0.0	0.0	0.0	0.0	0.0	0.0	0.0	0.0	0.0	0.0	1.0	0.0	0.0	1.0	0.0	0.0	0.0	0.0	0.0	0.0
MRPS25	64432	symbol	H. sapiens	64432	H. sapiens	0.0	0.0	0.0	0.0	0.0	0.0	0.0	0.0	0.0	0.0	0.0	0.0	0.0	1.0	0.0	0.0	0.0	0.0	0.0	0.0
RPL7	6129	symbol	H. sapiens	6129	H. sapiens	0.0	0.0	0.0	0.0	0.0	0.0	0.0	0.0	0.0	0.0	0.0	0.0	0.0	1.0	0.0	0.0	0.0	0.0	0.0	0.0
MKI67	4288	symbol	H. sapiens	4288	H. sapiens	1.0	1.0	0.0	0.0	0.0	0.0	0.0	0.0	0.0	0.0	0.0	0.0	0.0	0.0	0.0	0.0	0.0	0.0	0.0	0.0
RACGAP1	29127	symbol	H. sapiens	29127	H. sapiens	1.0	1.0	0.0	0.0	1.0	1.0	0.0	0.0	0.0	0.0	0.0	0.0	0.0	0.0	0.0	0.0	0.0	0.0	1.0	0.0
CBX5	23468	symbol	H. sapiens	23468	H. sapiens	0.0	1.0	0.0	0.0	0.0	0.0	0.0	0.0	0.0	0.0	0.0	0.0	0.0	0.0	0.0	0.0	0.0	0.0	0.0	0.0
PRC1	9055	symbol	H. sapiens	9055	H. sapiens	1.0	1.0	0.0	0.0	1.0	0.0	0.0	0.0	0.0	0.0	0.0	0.0	0.0	0.0	0.0	0.0	0.0	0.0	0.0	0.0
MRPS27	23107	symbol	H. sapiens	23107	H. sapiens	0.0	0.0	0.0	0.0	0.0	0.0	0.0	0.0	0.0	0.0	0.0	0.0	0.0	1.0	0.0	0.0	0.0	0.0	0.0	0.0
SLC7A1	6541	symbol	H. sapiens	6541	H. sapiens	0.0	0.0	0.0	0.0	0.0	0.0	0.0	0.0	0.0	0.0	0.0	0.0	0.0	0.0	0.0	0.0	0.0	0.0	0.0	0.0
UNG	7374	symbol	H. sapiens	7374	H. sapiens	0.0	0.0	1.0	0.0	0.0	0.0	0.0	0.0	0.0	0.0	1.0	0.0	0.0	0.0	0.0	0.0	0.0	0.0	0.0	0.0
MTHFD1	4522	symbol	H. sapiens	4522	H. sapiens	0.0	0.0	0.0	0.0	0.0	0.0	0.0	0.0	0.0	0.0	0.0	0.0	0.0	0.0	0.0	0.0	0.0	0.0	0.0	0.0
CSE1L	1434	symbol	H. sapiens	1434	H. sapiens	0.0	0.0	0.0	0.0	0.0	0.0	0.0	0.0	0.0	0.0	0.0	0.0	0.0	0.0	0.0	0.0	0.0	0.0	0.0	0.0
RPS24	6229	symbol	H. sapiens	6229	H. sapiens	0.0	0.0	0.0	0.0	0.0	0.0	0.0	0.0	0.0	0.0	1.0	0.0	0.0	1.0	0.0	0.0	0.0	0.0	0.0	0.0
MCM7	4176	symbol	H. sapiens	4176	H. sapiens	0.0	1.0	1.0	1.0	0.0	1.0	0.0	0.0	0.0	0.0	1.0	0.0	0.0	0.0	0.0	0.0	0.0	0.0	0.0	0.0
MCM4	4173	symbol	H. sapiens	4173	H. sapiens	0.0	1.0	1.0	1.0	0.0	1.0	0.0	0.0	0.0	0.0	1.0	0.0	0.0	0.0	0.0	0.0	0.0	0.0	0.0	0.0
RPL10A	4736	symbol	H. sapiens	4736	H. sapiens	0.0	0.0	0.0	0.0	0.0	0.0	0.0	0.0	0.0	0.0	0.0	0.0	0.0	1.0	0.0	0.0	0.0	0.0	0.0	0.0
PTMA	5757	symbol	H. sapiens	5757	H. sapiens	0.0	0.0	0.0	0.0	0.0	0.0	0.0	0.0	0.0	0.0	1.0	0.0	0.0	0.0	0.0	0.0	0.0	0.0	0.0	0.0
HMGB1	3146	symbol	H. sapiens	3146	H. sapiens	0.0	1.0	1.0	1.0	0.0	0.0	0.0	0.0	0.0	0.0	1.0	0.0	0.0	0.0	0.0	1.0	0.0	1.0	0.0	0.0

## Sheet: Enrichment_down_both
GroupID	Category	Term	Description	LogP	Log(q-value)	InTerm_InList	Genes	Symbols
1_Summary	GO Biological Processes	GO:0000280	nuclear division	-20.2346	-16.3171	28/411	891,1062,1063,4085,4288,4603,4751,6790,7153,9055,9319,9493,9787,9928,10051,10592,11004,25788,27085,29127,51203,54443,55165,63979,64151,79075,84057,259266,4137,1894,57082,81610,641,890,10112,29899,54892,55835,144455,4927,55638,93664,117177,140730,152579,9768,10426,50861	CCNB1,CENPE,CENPF,MAD2L1,MKI67,MYBL1,NEK2,AURKA,TOP2A,PRC1,TRIP13,KIF23,DLGAP5,KIF14,SMC4,SMC2,KIF2C,RAD54B,MTBP,RACGAP1,NUSAP1,ANLN,CEP55,FIGNL1,NCAPG,DSCC1,MND1,ASPM,MAPT,ECT2,KNL1,FAM83D,BLM,CCNA2,KIF20A,GPSM2,NCAPG2,CENPJ,E2F7,NUP88,SYBU,CADPS2,RAB3IP,RIMS4,SCFD2,PCLAF,TUBGCP3,STMN3
1_Member	GO Biological Processes	GO:0000280	nuclear division	-20.2346	-16.3171	28/411	891,1062,1063,4085,4288,4603,4751,6790,7153,9055,9319,9493,9787,9928,10051,10592,11004,25788,27085,29127,51203,54443,55165,63979,64151,79075,84057,259266	CCNB1,CENPE,CENPF,MAD2L1,MKI67,MYBL1,NEK2,AURKA,TOP2A,PRC1,TRIP13,KIF23,DLGAP5,KIF14,SMC4,SMC2,KIF2C,RAD54B,MTBP,RACGAP1,NUSAP1,ANLN,CEP55,FIGNL1,NCAPG,DSCC1,MND1,ASPM
1_Member	GO Biological Processes	GO:0048285	organelle fission	-20.2166	-16.3171	29/453	891,1062,1063,4085,4137,4288,4603,4751,6790,7153,9055,9319,9493,9787,9928,10051,10592,11004,25788,27085,29127,51203,54443,55165,63979,64151,79075,84057,259266	CCNB1,CENPE,CENPF,MAD2L1,MAPT,MKI67,MYBL1,NEK2,AURKA,TOP2A,PRC1,TRIP13,KIF23,DLGAP5,KIF14,SMC4,SMC2,KIF2C,RAD54B,MTBP,RACGAP1,NUSAP1,ANLN,CEP55,FIGNL1,NCAPG,DSCC1,MND1,ASPM
1_Member	GO Biological Processes	GO:0098813	nuclear chromosome segregation	-17.7275	-14.0238	22/265	891,1062,1063,1894,4085,4751,7153,9055,9319,9493,9787,9928,10051,10592,11004,29127,51203,55165,57082,64151,79075,81610	CCNB1,CENPE,CENPF,ECT2,MAD2L1,NEK2,TOP2A,PRC1,TRIP13,KIF23,DLGAP5,KIF14,SMC4,SMC2,KIF2C,RACGAP1,NUSAP1,CEP55,KNL1,NCAPG,DSCC1,FAM83D
1_Member	GO Biological Processes	GO:0140014	mitotic nuclear division	-17.6223	-14.0238	22/268	891,1062,1063,4085,4288,4751,6790,9055,9319,9493,9787,9928,10051,10592,11004,27085,29127,51203,54443,55165,64151,79075	CCNB1,CENPE,CENPF,MAD2L1,MKI67,NEK2,AURKA,PRC1,TRIP13,KIF23,DLGAP5,KIF14,SMC4,SMC2,KIF2C,MTBP,RACGAP1,NUSAP1,ANLN,CEP55,NCAPG,DSCC1
1_Member	GO Biological Processes	GO:0000070	mitotic sister chromatid segregation	-17.2129	-13.7113	18/154	891,1062,1063,4085,4751,9055,9319,9493,9787,9928,10051,10592,11004,29127,51203,55165,64151,79075	CCNB1,CENPE,CENPF,MAD2L1,NEK2,PRC1,TRIP13,KIF23,DLGAP5,KIF14,SMC4,SMC2,KIF2C,RACGAP1,NUSAP1,CEP55,NCAPG,DSCC1
1_Member	GO Biological Processes	GO:0007059	chromosome segregation	-17.0098	-13.5874	23/324	891,1062,1063,1894,4085,4288,4751,7153,9055,9319,9493,9787,9928,10051,10592,11004,29127,51203,55165,57082,64151,79075,81610	CCNB1,CENPE,CENPF,ECT2,MAD2L1,MKI67,NEK2,TOP2A,PRC1,TRIP13,KIF23,DLGAP5,KIF14,SMC4,SMC2,KIF2C,RACGAP1,NUSAP1,CEP55,KNL1,NCAPG,DSCC1,FAM83D
1_Member	GO Biological Processes	GO:0051301	cell division	-16.9401	-13.5847	29/598	641,890,891,1062,1063,1894,4085,4751,6790,7153,9055,9493,9928,10051,10112,10592,11004,29127,29899,51203,54443,54892,55165,55835,57082,64151,81610,144455,259266	BLM,CCNA2,CCNB1,CENPE,CENPF,ECT2,MAD2L1,NEK2,AURKA,TOP2A,PRC1,KIF23,KIF14,SMC4,KIF20A,SMC2,KIF2C,RACGAP1,GPSM2,NUSAP1,ANLN,NCAPG2,CEP55,CENPJ,KNL1,NCAPG,FAM83D,E2F7,ASPM
1_Member	GO Biological Processes	GO:0000819	sister chromatid segregation	-16.7716	-13.4741	19/192	891,1062,1063,4085,4751,7153,9055,9319,9493,9787,9928,10051,10592,11004,29127,51203,55165,64151,79075	CCNB1,CENPE,CENPF,MAD2L1,NEK2,TOP2A,PRC1,TRIP13,KIF23,DLGAP5,KIF14,SMC4,SMC2,KIF2C,RACGAP1,NUSAP1,CEP55,NCAPG,DSCC1
1_Member	GO Biological Processes	GO:0051640	organelle localization	-9.91129	-6.96598	23/706	891,1062,1063,4085,4137,4751,4927,6790,9493,9787,9928,11004,29899,51203,55165,55638,55835,81610,93664,117177,140730,152579,259266	CCNB1,CENPE,CENPF,MAD2L1,MAPT,NEK2,NUP88,AURKA,KIF23,DLGAP5,KIF14,KIF2C,GPSM2,NUSAP1,CEP55,SYBU,CENPJ,FAM83D,CADPS2,RAB3IP,RIMS4,SCFD2,ASPM
1_Member	GO Biological Processes	GO:0000226	microtubule cytoskeleton organization	-9.28745	-6.40909	20/564	891,1062,4085,4137,4751,6790,9055,9493,9768,9928,10112,10426,11004,29127,29899,50861,51203,55835,63979,259266	CCNB1,CENPE,MAD2L1,MAPT,NEK2,AURKA,PRC1,KIF23,PCLAF,KIF14,KIF20A,TUBGCP3,KIF2C,RACGAP1,GPSM2,STMN3,NUSAP1,CENPJ,FIGNL1,ASPM
1_Member	GO Biological Processes	GO:0007017	microtubule-based process	-8.49835	-5.71275	22/764	891,1062,4085,4137,4751,6790,9055,9493,9768,9787,9928,10112,10426,11004,29127,29899,50861,51203,55638,55835,63979,259266	CCNB1,CENPE,MAD2L1,MAPT,NEK2,AURKA,PRC1,KIF23,PCLAF,DLGAP5,KIF14,KIF20A,TUBGCP3,KIF2C,RACGAP1,GPSM2,STMN3,NUSAP1,SYBU,CENPJ,FIGNL1,ASPM
1_Member	GO Biological Processes	GO:0090068	positive regulation of cell cycle process	-8.14293	-5.417	14/298	891,1894,4085,6790,9493,9787,9928,27085,29127,29899,51203,55835,81610,144455	CCNB1,ECT2,MAD2L1,AURKA,KIF23,DLGAP5,KIF14,MTBP,RACGAP1,GPSM2,NUSAP1,CENPJ,FAM83D,E2F7
1_Member	GO Biological Processes	GO:1902850	microtubule cytoskeleton organization involved in mitosis	-7.84152	-5.15945	10/134	891,1062,4085,4751,6790,9055,9493,29127,29899,51203	CCNB1,CENPE,MAD2L1,NEK2,AURKA,PRC1,KIF23,RACGAP1,GPSM2,NUSAP1
1_Member	GO Biological Processes	GO:0051656	establishment of organelle localization	-7.55737	-4.94786	17/510	891,1062,1063,4085,4137,4927,9493,9787,9928,11004,29899,51203,55165,55638,81610,93664,140730	CCNB1,CENPE,CENPF,MAD2L1,MAPT,NUP88,KIF23,DLGAP5,KIF14,KIF2C,GPSM2,NUSAP1,CEP55,SYBU,FAM83D,CADPS2,RIMS4
1_Member	GO Biological Processes	GO:0051303	establishment of chromosome localization	-7.45927	-4.86955	8/78	891,1062,1063,9787,9928,11004,55165,81610	CCNB1,CENPE,CENPF,DLGAP5,KIF14,KIF2C,CEP55,FAM83D
1_Member	GO Biological Processes	GO:0050000	chromosome localization	-7.41522	-4.8379	8/79	891,1062,1063,9787,9928,11004,55165,81610	CCNB1,CENPE,CENPF,DLGAP5,KIF14,KIF2C,CEP55,FAM83D
1_Member	GO Biological Processes	GO:0051310	metaphase plate congression	-6.98342	-4.43606	7/60	891,1062,1063,9928,11004,55165,81610	CCNB1,CENPE,CENPF,KIF14,KIF2C,CEP55,FAM83D
1_Member	GO Biological Processes	GO:0045787	positive regulation of cell cycle	-6.70456	-4.20295	14/389	891,1894,4085,6790,9493,9787,9928,27085,29127,29899,51203,55835,81610,144455	CCNB1,ECT2,MAD2L1,AURKA,KIF23,DLGAP5,KIF14,MTBP,RACGAP1,GPSM2,NUSAP1,CENPJ,FAM83D,E2F7
1_Member	GO Biological Processes	GO:0007051	spindle organization	-6.47513	-3.99055	10/187	891,1062,4751,6790,9055,9493,10426,29127,29899,259266	CCNB1,CENPE,NEK2,AURKA,PRC1,KIF23,TUBGCP3,RACGAP1,GPSM2,ASPM
1_Member	GO Biological Processes	GO:0007052	mitotic spindle organization	-6.32153	-3.86914	8/109	891,1062,4751,6790,9055,9493,29127,29899	CCNB1,CENPE,NEK2,AURKA,PRC1,KIF23,RACGAP1,GPSM2
1_Member	GO Biological Processes	GO:0007080	mitotic metaphase plate congression	-4.92743	-2.67134	5/47	891,1062,9928,11004,55165	CCNB1,CENPE,KIF14,KIF2C,CEP55
1_Member	GO Biological Processes	GO:0051225	spindle assembly	-4.81764	-2.58554	7/125	4751,6790,9493,10426,29127,29899,259266	NEK2,AURKA,KIF23,TUBGCP3,RACGAP1,GPSM2,ASPM
2_Summary	GO Biological Processes	GO:0044770	cell cycle phase transition	-12.6115	-9.36518	25/631	596,641,890,891,1033,1062,1063,3161,4085,4173,4176,4751,5422,6502,6790,7298,9319,9787,9833,9928,27085,54443,55835,81610,144455,1894,4288,9055,9493,10112,23468,27044,29127,29899,51203,11004,7153,220042,580,55771,3720,4137,857,3146	BCL2,BLM,CCNA2,CCNB1,CDKN3,CENPE,CENPF,HMMR,MAD2L1,MCM4,MCM7,NEK2,POLA1,SKP2,AURKA,TYMS,TRIP13,DLGAP5,MELK,KIF14,MTBP,ANLN,CENPJ,FAM83D,E2F7,ECT2,MKI67,PRC1,KIF23,KIF20A,CBX5,SND1,RACGAP1,GPSM2,NUSAP1,KIF2C,TOP2A,DDIAS,BARD1,PRR11,JARID2,MAPT,CAV1,HMGB1
2_Member	GO Biological Processes	GO:0044770	cell cycle phase transition	-12.6115	-9.36518	25/631	596,641,890,891,1033,1062,1063,3161,4085,4173,4176,4751,5422,6502,6790,7298,9319,9787,9833,9928,27085,54443,55835,81610,144455	BCL2,BLM,CCNA2,CCNB1,CDKN3,CENPE,CENPF,HMMR,MAD2L1,MCM4,MCM7,NEK2,POLA1,SKP2,AURKA,TYMS,TRIP13,DLGAP5,MELK,KIF14,MTBP,ANLN,CENPJ,FAM83D,E2F7
2_Member	GO Biological Processes	GO:0044772	mitotic cell cycle phase transition	-12.3872	-9.228	24/588	596,641,890,891,1033,1062,1063,3161,4085,4173,4176,4751,5422,6502,6790,7298,9319,9787,9833,9928,27085,54443,55835,144455	BCL2,BLM,CCNA2,CCNB1,CDKN3,CENPE,CENPF,HMMR,MAD2L1,MCM4,MCM7,NEK2,POLA1,SKP2,AURKA,TYMS,TRIP13,DLGAP5,MELK,KIF14,MTBP,ANLN,CENPJ,E2F7
2_Member	GO Biological Processes	GO:0010564	regulation of cell cycle process	-12.1108	-8.98945	27/789	596,641,891,1062,1063,1894,3161,4085,4288,4751,6790,9055,9319,9493,9787,9928,10112,23468,27044,27085,29127,29899,51203,54443,55835,81610,144455	BCL2,BLM,CCNB1,CENPE,CENPF,ECT2,HMMR,MAD2L1,MKI67,NEK2,AURKA,PRC1,TRIP13,KIF23,DLGAP5,KIF14,KIF20A,CBX5,SND1,MTBP,RACGAP1,GPSM2,NUSAP1,ANLN,CENPJ,FAM83D,E2F7
2_Member	GO Biological Processes	GO:0051983	regulation of chromosome segregation	-10.2564	-7.28632	11/103	891,1062,1063,1894,4085,4288,4751,9319,9787,11004,29127	CCNB1,CENPE,CENPF,ECT2,MAD2L1,MKI67,NEK2,TRIP13,DLGAP5,KIF2C,RACGAP1
2_Member	GO Biological Processes	GO:0007088	regulation of mitotic nuclear division	-9.14833	-6.30948	12/166	891,1062,1063,4085,4288,4751,6790,9319,9787,27085,51203,54443	CCNB1,CENPE,CENPF,MAD2L1,MKI67,NEK2,AURKA,TRIP13,DLGAP5,MTBP,NUSAP1,ANLN
2_Member	GO Biological Processes	GO:0007346	regulation of mitotic cell cycle	-8.87691	-6.07427	21/661	596,641,891,1062,1063,3161,4085,4288,4751,6790,7153,9319,9787,9928,27085,29899,51203,54443,55835,144455,220042	BCL2,BLM,CCNB1,CENPE,CENPF,HMMR,MAD2L1,MKI67,NEK2,AURKA,TOP2A,TRIP13,DLGAP5,KIF14,MTBP,GPSM2,NUSAP1,ANLN,CENPJ,E2F7,DDIAS
2_Member	GO Biological Processes	GO:0051783	regulation of nuclear division	-8.47816	-5.70894	12/190	891,1062,1063,4085,4288,4751,6790,9319,9787,27085,51203,54443	CCNB1,CENPE,CENPF,MAD2L1,MKI67,NEK2,AURKA,TRIP13,DLGAP5,MTBP,NUSAP1,ANLN
2_Member	GO Biological Processes	GO:1901987	regulation of cell cycle phase transition	-7.94218	-5.23296	17/480	596,641,891,1062,1063,3161,4085,4751,6790,9319,9787,9928,27085,54443,55835,81610,144455	BCL2,BLM,CCNB1,CENPE,CENPF,HMMR,MAD2L1,NEK2,AURKA,TRIP13,DLGAP5,KIF14,MTBP,ANLN,CENPJ,FAM83D,E2F7
2_Member	GO Biological Processes	GO:1901990	regulation of mitotic cell cycle phase transition	-7.60444	-4.98364	16/444	596,641,891,1062,1063,3161,4085,4751,6790,9319,9787,9928,27085,54443,55835,144455	BCL2,BLM,CCNB1,CENPE,CENPF,HMMR,MAD2L1,NEK2,AURKA,TRIP13,DLGAP5,KIF14,MTBP,ANLN,CENPJ,E2F7
2_Member	GO Biological Processes	GO:0000086	G2/M transition of mitotic cell cycle	-6.27381	-3.8291	11/247	641,890,891,1063,3161,4751,6502,6790,9833,9928,55835	BLM,CCNA2,CCNB1,CENPF,HMMR,NEK2,SKP2,AURKA,MELK,KIF14,CENPJ
2_Member	GO Biological Processes	GO:0030071	regulation of mitotic metaphase/anaphase transition	-6.07929	-3.67805	6/51	891,1062,1063,4085,9319,9787	CCNB1,CENPE,CENPF,MAD2L1,TRIP13,DLGAP5
2_Member	GO Biological Processes	GO:1902099	regulation of metaphase/anaphase transition of cell cycle	-5.97839	-3.59073	6/53	891,1062,1063,4085,9319,9787	CCNB1,CENPE,CENPF,MAD2L1,TRIP13,DLGAP5
2_Member	GO Biological Processes	GO:0044839	cell cycle G2/M phase transition	-5.95724	-3.5762	11/266	641,890,891,1063,3161,4751,6502,6790,9833,9928,55835	BLM,CCNA2,CCNB1,CENPF,HMMR,NEK2,SKP2,AURKA,MELK,KIF14,CENPJ
2_Member	GO Biological Processes	GO:0007091	metaphase/anaphase transition of mitotic cell cycle	-5.9295	-3.555	6/54	891,1062,1063,4085,9319,9787	CCNB1,CENPE,CENPF,MAD2L1,TRIP13,DLGAP5
2_Member	GO Biological Processes	GO:0044784	metaphase/anaphase transition of cell cycle	-5.83465	-3.46658	6/56	891,1062,1063,4085,9319,9787	CCNB1,CENPE,CENPF,MAD2L1,TRIP13,DLGAP5
2_Member	GO Biological Processes	GO:0010965	regulation of mitotic sister chromatid separation	-5.7886	-3.42688	6/57	891,1062,1063,4085,9319,9787	CCNB1,CENPE,CENPF,MAD2L1,TRIP13,DLGAP5
2_Member	GO Biological Processes	GO:0051304	chromosome separation	-5.76571	-3.41023	7/90	891,1062,1063,4085,7153,9319,9787	CCNB1,CENPE,CENPF,MAD2L1,TOP2A,TRIP13,DLGAP5
2_Member	GO Biological Processes	GO:0051306	mitotic sister chromatid separation	-5.65563	-3.30632	6/60	891,1062,1063,4085,9319,9787	CCNB1,CENPE,CENPF,MAD2L1,TRIP13,DLGAP5
2_Member	GO Biological Processes	GO:1905818	regulation of chromosome separation	-5.57099	-3.23964	6/62	891,1062,1063,4085,9319,9787	CCNB1,CENPE,CENPF,MAD2L1,TRIP13,DLGAP5
2_Member	GO Biological Processes	GO:0045786	negative regulation of cell cycle	-5.46974	-3.14423	16/642	580,596,641,891,1033,1063,4085,4751,6790,7153,9319,23468,27085,55771,144455,220042	BARD1,BCL2,BLM,CCNB1,CDKN3,CENPF,MAD2L1,NEK2,AURKA,TOP2A,TRIP13,CBX5,MTBP,PRR11,E2F7,DDIAS
2_Member	GO Biological Processes	GO:0033047	regulation of mitotic sister chromatid segregation	-5.33403	-3.03108	6/68	891,1062,1063,4085,9319,9787	CCNB1,CENPE,CENPF,MAD2L1,TRIP13,DLGAP5
2_Member	GO Biological Processes	GO:0007093	mitotic cell cycle checkpoint	-4.97129	-2.70521	8/165	641,891,1063,4085,6790,7153,9319,144455	BLM,CCNB1,CENPF,MAD2L1,AURKA,TOP2A,TRIP13,E2F7
2_Member	GO Biological Processes	GO:0045930	negative regulation of mitotic cell cycle	-4.96206	-2.701	11/338	596,641,891,1063,4085,6790,7153,9319,27085,144455,220042	BCL2,BLM,CCNB1,CENPF,MAD2L1,AURKA,TOP2A,TRIP13,MTBP,E2F7,DDIAS
2_Member	GO Biological Processes	GO:0033045	regulation of sister chromatid segregation	-4.92253	-2.67134	6/80	891,1062,1063,4085,9319,9787	CCNB1,CENPE,CENPF,MAD2L1,TRIP13,DLGAP5
2_Member	GO Biological Processes	GO:0033044	regulation of chromosome organization	-4.87907	-2.63754	11/345	891,1062,1063,3720,4085,4137,4288,4751,7153,9319,9787	CCNB1,CENPE,CENPF,JARID2,MAD2L1,MAPT,MKI67,NEK2,TOP2A,TRIP13,DLGAP5
2_Member	GO Biological Processes	GO:0045839	negative regulation of mitotic nuclear division	-4.7095	-2.4957	5/52	891,1063,4085,9319,27085	CCNB1,CENPF,MAD2L1,TRIP13,MTBP
2_Member	GO Biological Processes	GO:0010948	negative regulation of cell cycle process	-4.69686	-2.49508	11/361	596,641,891,1063,4085,4751,6790,9319,23468,27085,144455	BCL2,BLM,CCNB1,CENPF,MAD2L1,NEK2,AURKA,TRIP13,CBX5,MTBP,E2F7
2_Member	GO Biological Processes	GO:0010389	regulation of G2/M transition of mitotic cell cycle	-4.43272	-2.25745	8/196	641,891,1063,3161,4751,6790,9928,55835	BLM,CCNB1,CENPF,HMMR,NEK2,AURKA,KIF14,CENPJ
2_Member	GO Biological Processes	GO:0051784	negative regulation of nuclear division	-4.40467	-2.23903	5/60	891,1063,4085,9319,27085	CCNB1,CENPF,MAD2L1,TRIP13,MTBP
2_Member	GO Biological Processes	GO:0007094	mitotic spindle assembly checkpoint	-4.20832	-2.06845	4/34	891,1063,4085,9319	CCNB1,CENPF,MAD2L1,TRIP13
2_Member	GO Biological Processes	GO:0031577	spindle checkpoint	-4.20832	-2.06845	4/34	891,1063,4085,9319	CCNB1,CENPF,MAD2L1,TRIP13
2_Member	GO Biological Processes	GO:0071173	spindle assembly checkpoint	-4.20832	-2.06845	4/34	891,1063,4085,9319	CCNB1,CENPF,MAD2L1,TRIP13
2_Member	GO Biological Processes	GO:0071174	mitotic spindle checkpoint	-4.20832	-2.06845	4/34	891,1063,4085,9319	CCNB1,CENPF,MAD2L1,TRIP13
2_Member	GO Biological Processes	GO:1902749	regulation of cell cycle G2/M phase transition	-4.17788	-2.04176	8/213	641,891,1063,3161,4751,6790,9928,55835	BLM,CCNB1,CENPF,HMMR,NEK2,AURKA,KIF14,CENPJ
2_Member	GO Biological Processes	GO:0000075	cell cycle checkpoint	-4.1354	-2.00301	8/216	641,891,1063,4085,6790,7153,9319,144455	BLM,CCNB1,CENPF,MAD2L1,AURKA,TOP2A,TRIP13,E2F7
2_Member	GO Biological Processes	GO:0045841	negative regulation of mitotic metaphase/anaphase transition	-4.10874	-1.98005	4/36	891,1063,4085,9319	CCNB1,CENPF,MAD2L1,TRIP13
2_Member	GO Biological Processes	GO:1902100	negative regulation of metaphase/anaphase transition of cell cycle	-4.06119	-1.9439	4/37	891,1063,4085,9319	CCNB1,CENPF,MAD2L1,TRIP13
2_Member	GO Biological Processes	GO:2000816	negative regulation of mitotic sister chromatid separation	-3.97016	-1.88353	4/39	891,1063,4085,9319	CCNB1,CENPF,MAD2L1,TRIP13
2_Member	GO Biological Processes	GO:1905819	negative regulation of chromosome separation	-3.92654	-1.85307	4/40	891,1063,4085,9319	CCNB1,CENPF,MAD2L1,TRIP13
2_Member	GO Biological Processes	GO:0033048	negative regulation of mitotic sister chromatid segregation	-3.84276	-1.78206	4/42	891,1063,4085,9319	CCNB1,CENPF,MAD2L1,TRIP13
2_Member	GO Biological Processes	GO:0033046	negative regulation of sister chromatid segregation	-3.76323	-1.71494	4/44	891,1063,4085,9319	CCNB1,CENPF,MAD2L1,TRIP13
2_Member	GO Biological Processes	GO:0051985	negative regulation of chromosome segregation	-3.72494	-1.68847	4/45	891,1063,4085,9319	CCNB1,CENPF,MAD2L1,TRIP13
2_Member	GO Biological Processes	GO:1901991	negative regulation of mitotic cell cycle phase transition	-3.72173	-1.68847	8/248	596,641,891,1063,4085,6790,9319,144455	BCL2,BLM,CCNB1,CENPF,MAD2L1,AURKA,TRIP13,E2F7
2_Member	GO Biological Processes	GO:1901988	negative regulation of cell cycle phase transition	-3.50543	-1.49798	8/267	596,641,891,1063,4085,6790,9319,144455	BCL2,BLM,CCNB1,CENPF,MAD2L1,AURKA,TRIP13,E2F7
2_Member	GO Biological Processes	GO:2001251	negative regulation of chromosome organization	-3.46544	-1.46077	6/146	891,1063,3720,4085,7153,9319	CCNB1,CENPF,JARID2,MAD2L1,TOP2A,TRIP13
2_Member	GO Biological Processes	GO:0010639	negative regulation of organelle organization	-3.01654	-1.07604	9/395	891,1063,3720,4085,4137,4751,7153,9319,27085	CCNB1,CENPF,JARID2,MAD2L1,MAPT,NEK2,TOP2A,TRIP13,MTBP
2_Member	GO Biological Processes	GO:0051129	negative regulation of cellular component organization	-2.54384	-0.690616	12/745	857,891,1063,3146,3720,4085,4137,4751,7153,9319,9928,27085	CAV1,CCNB1,CENPF,HMGB1,JARID2,MAD2L1,MAPT,NEK2,TOP2A,TRIP13,KIF14,MTBP
3_Summary	GO Biological Processes	GO:0071103	DNA conformation change	-12.5215	-9.32092	19/327	641,891,3146,3148,4173,4176,5983,5985,7153,10051,10592,25788,51203,51659,54892,57082,64151,64754,79075,580,5422,5425,7374,9156,9319,9768,10714,23201,23514,55215,63979,64710,84057	BLM,CCNB1,HMGB1,HMGB2,MCM4,MCM7,RFC3,RFC5,TOP2A,SMC4,SMC2,RAD54B,NUSAP1,GINS2,NCAPG2,KNL1,NCAPG,SMYD3,DSCC1,BARD1,POLA1,POLD2,UNG,EXO1,TRIP13,PCLAF,POLD3,FAM168A,SPIDR,FANCI,FIGNL1,NUCKS1,MND1
3_Member	GO Biological Processes	GO:0071103	DNA conformation change	-12.5215	-9.32092	19/327	641,891,3146,3148,4173,4176,5983,5985,7153,10051,10592,25788,51203,51659,54892,57082,64151,64754,79075	BLM,CCNB1,HMGB1,HMGB2,MCM4,MCM7,RFC3,RFC5,TOP2A,SMC4,SMC2,RAD54B,NUSAP1,GINS2,NCAPG2,KNL1,NCAPG,SMYD3,DSCC1
3_Member	GO Biological Processes	GO:0006281	DNA repair	-11.152	-8.12751	22/553	580,641,3146,3148,4173,4176,5422,5425,5983,5985,7374,9156,9319,9768,10714,23201,23514,25788,51659,55215,63979,64710	BARD1,BLM,HMGB1,HMGB2,MCM4,MCM7,POLA1,POLD2,RFC3,RFC5,UNG,EXO1,TRIP13,PCLAF,POLD3,FAM168A,SPIDR,RAD54B,GINS2,FANCI,FIGNL1,NUCKS1
3_Member	GO Biological Processes	GO:0032392	DNA geometric change	-9.57089	-6.64906	11/119	641,3146,3148,4173,4176,5983,5985,7153,25788,51659,79075	BLM,HMGB1,HMGB2,MCM4,MCM7,RFC3,RFC5,TOP2A,RAD54B,GINS2,DSCC1
3_Member	GO Biological Processes	GO:0006310	DNA recombination	-9.20282	-6.34466	15/293	641,3146,3148,4173,4176,7153,7374,9156,9319,23514,25788,51659,63979,64710,84057	BLM,HMGB1,HMGB2,MCM4,MCM7,TOP2A,UNG,EXO1,TRIP13,SPIDR,RAD54B,GINS2,FIGNL1,NUCKS1,MND1
3_Member	GO Biological Processes	GO:0032508	DNA duplex unwinding	-7.45734	-4.86955	9/110	641,4173,4176,5983,5985,7153,25788,51659,79075	BLM,MCM4,MCM7,RFC3,RFC5,TOP2A,RAD54B,GINS2,DSCC1
3_Member	GO Biological Processes	GO:0006302	double-strand break repair	-6.25645	-3.8193	11/248	580,641,4173,4176,5422,9319,23514,25788,51659,63979,64710	BARD1,BLM,MCM4,MCM7,POLA1,TRIP13,SPIDR,RAD54B,GINS2,FIGNL1,NUCKS1
3_Member	GO Biological Processes	GO:0000724	double-strand break repair via homologous recombination	-5.64027	-3.29702	8/134	641,4173,4176,23514,25788,51659,63979,64710	BLM,MCM4,MCM7,SPIDR,RAD54B,GINS2,FIGNL1,NUCKS1
3_Member	GO Biological Processes	GO:0000725	recombinational repair	-5.61605	-3.2788	8/135	641,4173,4176,23514,25788,51659,63979,64710	BLM,MCM4,MCM7,SPIDR,RAD54B,GINS2,FIGNL1,NUCKS1
3_Member	GO Biological Processes	GO:0000727	double-strand break repair via break-induced replication	-4.40218	-2.23903	3/11	4173,4176,51659	MCM4,MCM7,GINS2
3_Member	GO Biological Processes	GO:0006268	DNA unwinding involved in DNA replication	-4.06463	-1.9439	3/14	641,4173,4176	BLM,MCM4,MCM7
3_Member	GO Biological Processes	GO:0006270	DNA replication initiation	-2.78165	-0.888572	3/37	4173,4176,5422	MCM4,MCM7,POLA1
4_Summary	GO Biological Processes	GO:0006260	DNA replication	-11.6455	-8.55885	17/276	580,641,890,4173,4176,5422,5425,5983,5985,9156,9768,10714,11124,51659,64710,79075,144455,1063,4751,7298,3146,23201,23514,63979,596,891,6790,760,3148,27044	BARD1,BLM,CCNA2,MCM4,MCM7,POLA1,POLD2,RFC3,RFC5,EXO1,PCLAF,POLD3,FAF1,GINS2,NUCKS1,DSCC1,E2F7,CENPF,NEK2,TYMS,HMGB1,FAM168A,SPIDR,FIGNL1,BCL2,CCNB1,AURKA,CA2,HMGB2,SND1
4_Member	GO Biological Processes	GO:0006260	DNA replication	-11.6455	-8.55885	17/276	580,641,890,4173,4176,5422,5425,5983,5985,9156,9768,10714,11124,51659,64710,79075,144455	BARD1,BLM,CCNA2,MCM4,MCM7,POLA1,POLD2,RFC3,RFC5,EXO1,PCLAF,POLD3,FAF1,GINS2,NUCKS1,DSCC1,E2F7
4_Member	GO Biological Processes	GO:0022616	DNA strand elongation	-11.3646	-8.31017	8/27	4173,4176,5422,5425,5983,10714,51659,64710	MCM4,MCM7,POLA1,POLD2,RFC3,POLD3,GINS2,NUCKS1
4_Member	GO Biological Processes	GO:0006271	DNA strand elongation involved in DNA replication	-10.5888	-7.59237	7/20	4173,4176,5422,5425,5983,10714,51659	MCM4,MCM7,POLA1,POLD2,RFC3,POLD3,GINS2
4_Member	GO Biological Processes	GO:0006261	DNA-dependent DNA replication	-9.52533	-6.62578	12/154	641,4173,4176,5422,5425,5983,5985,10714,51659,64710,79075,144455	BLM,MCM4,MCM7,POLA1,POLD2,RFC3,RFC5,POLD3,GINS2,NUCKS1,DSCC1,E2F7
4_Member	GO Biological Processes	GO:0044786	cell cycle DNA replication	-7.73738	-5.08087	8/72	4173,4176,5422,5425,5983,5985,10714,144455	MCM4,MCM7,POLA1,POLD2,RFC3,RFC5,POLD3,E2F7
4_Member	GO Biological Processes	GO:0033260	nuclear DNA replication	-6.93278	-4.39496	7/61	4173,4176,5422,5425,5983,5985,10714	MCM4,MCM7,POLA1,POLD2,RFC3,RFC5,POLD3
4_Member	GO Biological Processes	GO:0006275	regulation of DNA replication	-6.35232	-3.89211	8/108	641,890,5983,5985,11124,64710,79075,144455	BLM,CCNA2,RFC3,RFC5,FAF1,NUCKS1,DSCC1,E2F7
4_Member	GO Biological Processes	GO:0071897	DNA biosynthetic process	-6.20664	-3.77691	10/200	1063,4751,5422,5425,5983,5985,7298,9768,10714,79075	CENPF,NEK2,POLA1,POLD2,RFC3,RFC5,TYMS,PCLAF,POLD3,DSCC1
4_Member	GO Biological Processes	GO:0032201	telomere maintenance via semi-conservative replication	-6.16189	-3.73947	5/27	5422,5425,5983,5985,10714	POLA1,POLD2,RFC3,RFC5,POLD3
4_Member	GO Biological Processes	GO:0000731	DNA synthesis involved in DNA repair	-6.07929	-3.67805	6/51	5422,5425,5983,5985,9768,10714	POLA1,POLD2,RFC3,RFC5,PCLAF,POLD3
4_Member	GO Biological Processes	GO:0051052	regulation of DNA metabolic process	-5.41159	-3.10311	13/431	641,890,3146,4751,5983,5985,11124,23201,23514,63979,64710,79075,144455	BLM,CCNA2,HMGB1,NEK2,RFC3,RFC5,FAF1,FAM168A,SPIDR,FIGNL1,NUCKS1,DSCC1,E2F7
4_Member	GO Biological Processes	GO:0019985	translesion synthesis	-5.22524	-2.93194	5/41	5425,5983,5985,9768,10714	POLD2,RFC3,RFC5,PCLAF,POLD3
4_Member	GO Biological Processes	GO:1900262	regulation of DNA-directed DNA polymerase activity	-5.06749	-2.7912	3/7	5983,5985,79075	RFC3,RFC5,DSCC1
4_Member	GO Biological Processes	GO:1900264	positive regulation of DNA-directed DNA polymerase activity	-5.06749	-2.7912	3/7	5983,5985,79075	RFC3,RFC5,DSCC1
4_Member	GO Biological Processes	GO:0000723	telomere maintenance	-5.02951	-2.75835	8/162	641,4751,5422,5425,5983,5985,9156,10714	BLM,NEK2,POLA1,POLD2,RFC3,RFC5,EXO1,POLD3
4_Member	GO Biological Processes	GO:0006297	nucleotide-excision repair, DNA gap filling	-4.82685	-2.59006	4/24	5425,5983,5985,10714	POLD2,RFC3,RFC5,POLD3
4_Member	GO Biological Processes	GO:0051054	positive regulation of DNA metabolic process	-4.80681	-2.57937	9/228	3146,4751,5983,5985,11124,23201,23514,79075,144455	HMGB1,NEK2,RFC3,RFC5,FAF1,FAM168A,SPIDR,DSCC1,E2F7
4_Member	GO Biological Processes	GO:0032200	telomere organization	-4.78562	-2.56277	8/175	641,4751,5422,5425,5983,5985,9156,10714	BLM,NEK2,POLA1,POLD2,RFC3,RFC5,EXO1,POLD3
4_Member	GO Biological Processes	GO:0006301	postreplication repair	-4.7095	-2.4957	5/52	5425,5983,5985,9768,10714	POLD2,RFC3,RFC5,PCLAF,POLD3
4_Member	GO Biological Processes	GO:0090329	regulation of DNA-dependent DNA replication	-4.62869	-2.43672	5/54	641,5983,5985,79075,144455	BLM,RFC3,RFC5,DSCC1,E2F7
4_Member	GO Biological Processes	GO:0072331	signal transduction by p53 class mediator	-4.2575	-2.10225	9/268	580,596,641,891,5983,5985,6790,9156,144455	BARD1,BCL2,BLM,CCNB1,RFC3,RFC5,AURKA,EXO1,E2F7
4_Member	GO Biological Processes	GO:0006296	nucleotide-excision repair, DNA incision, 5'-to lesion	-4.06119	-1.9439	4/37	5425,5983,5985,10714	POLD2,RFC3,RFC5,POLD3
4_Member	GO Biological Processes	GO:0006298	mismatch repair	-4.01502	-1.9162	4/38	3146,5425,9156,10714	HMGB1,POLD2,EXO1,POLD3
4_Member	GO Biological Processes	GO:0033683	nucleotide-excision repair, DNA incision	-3.97016	-1.88353	4/39	5425,5983,5985,10714	POLD2,RFC3,RFC5,POLD3
4_Member	GO Biological Processes	GO:0042769	DNA damage response, detection of DNA damage	-3.97016	-1.88353	4/39	5425,5983,5985,10714	POLD2,RFC3,RFC5,POLD3
4_Member	GO Biological Processes	GO:0060249	anatomical structure homeostasis	-3.95038	-1.86798	11/437	580,596,641,760,4751,5422,5425,5983,5985,9156,10714	BARD1,BCL2,BLM,CA2,NEK2,POLA1,POLD2,RFC3,RFC5,EXO1,POLD3
4_Member	GO Biological Processes	GO:1901796	regulation of signal transduction by p53 class mediator	-3.81182	-1.75426	7/180	580,596,641,5983,5985,6790,9156	BARD1,BCL2,BLM,RFC3,RFC5,AURKA,EXO1
4_Member	GO Biological Processes	GO:0006289	nucleotide-excision repair	-3.14654	-1.17896	5/111	5422,5425,5983,5985,10714	POLA1,POLD2,RFC3,RFC5,POLD3
4_Member	GO Biological Processes	GO:0090305	nucleic acid phosphodiester bond hydrolysis	-3.14321	-1.17816	8/303	3146,3148,5425,5983,5985,9156,10714,27044	HMGB1,HMGB2,POLD2,RFC3,RFC5,EXO1,POLD3,SND1
4_Member	GO Biological Processes	GO:2000573	positive regulation of DNA biosynthetic process	-3.06045	-1.11272	4/67	4751,5983,5985,79075	NEK2,RFC3,RFC5,DSCC1
4_Member	GO Biological Processes	GO:0006283	transcription-coupled nucleotide-excision repair	-2.92089	-0.989822	4/73	5425,5983,5985,10714	POLD2,RFC3,RFC5,POLD3
4_Member	GO Biological Processes	GO:2000278	regulation of DNA biosynthetic process	-2.24698	-0.456888	4/112	4751,5983,5985,79075	NEK2,RFC3,RFC5,DSCC1
5_Summary	GO Biological Processes	GO:0008608	attachment of spindle microtubules to kinetochore	-8.97877	-6.1584	7/32	891,1062,1894,4751,11004,29127,57082,6790,9055,9493,9928,10112,51203,54443,55165,144455,641,259266,4137,9787,55638	CCNB1,CENPE,ECT2,NEK2,KIF2C,RACGAP1,KNL1,AURKA,PRC1,KIF23,KIF14,KIF20A,NUSAP1,ANLN,CEP55,E2F7,BLM,ASPM,MAPT,DLGAP5,SYBU
5_Member	GO Biological Processes	GO:0008608	attachment of spindle microtubules to kinetochore	-8.97877	-6.1584	7/32	891,1062,1894,4751,11004,29127,57082	CCNB1,CENPE,ECT2,NEK2,KIF2C,RACGAP1,KNL1
5_Member	GO Biological Processes	GO:0000910	cytokinesis	-7.89673	-5.2013	11/171	1894,6790,9055,9493,9928,10112,29127,51203,54443,55165,144455	ECT2,AURKA,PRC1,KIF23,KIF14,KIF20A,RACGAP1,NUSAP1,ANLN,CEP55,E2F7
5_Member	GO Biological Processes	GO:0000912	assembly of actomyosin apparatus involved in cytokinesis	-7.63852	-5.00615	4/6	1894,9493,29127,54443	ECT2,KIF23,RACGAP1,ANLN
5_Member	GO Biological Processes	GO:0000915	actomyosin contractile ring assembly	-7.63852	-5.00615	4/6	1894,9493,29127,54443	ECT2,KIF23,RACGAP1,ANLN
5_Member	GO Biological Processes	GO:0044837	actomyosin contractile ring organization	-7.27269	-4.70559	4/7	1894,9493,29127,54443	ECT2,KIF23,RACGAP1,ANLN
5_Member	GO Biological Processes	GO:0032465	regulation of cytokinesis	-7.0059	-4.44878	8/89	1894,6790,9055,9493,9928,10112,29127,144455	ECT2,AURKA,PRC1,KIF23,KIF14,KIF20A,RACGAP1,E2F7
5_Member	GO Biological Processes	GO:0051302	regulation of cell division	-6.90824	-4.37976	10/168	641,1894,6790,9055,9493,9928,10112,29127,144455,259266	BLM,ECT2,AURKA,PRC1,KIF23,KIF14,KIF20A,RACGAP1,E2F7,ASPM
5_Member	GO Biological Processes	GO:0032506	cytokinetic process	-6.79404	-4.28366	6/39	1894,9493,10112,29127,54443,55165	ECT2,KIF23,KIF20A,RACGAP1,ANLN,CEP55
5_Member	GO Biological Processes	GO:0000281	mitotic cytokinesis	-6.38808	-3.9199	7/73	1894,9493,10112,29127,51203,54443,55165	ECT2,KIF23,KIF20A,RACGAP1,NUSAP1,ANLN,CEP55
5_Member	GO Biological Processes	GO:0051988	regulation of attachment of spindle microtubules to kinetochore	-6.13289	-3.71764	4/12	891,1894,4751,29127	CCNB1,ECT2,NEK2,RACGAP1
5_Member	GO Biological Processes	GO:0061640	cytoskeleton-dependent cytokinesis	-5.45772	-3.14363	7/100	1894,9493,10112,29127,51203,54443,55165	ECT2,KIF23,KIF20A,RACGAP1,NUSAP1,ANLN,CEP55
5_Member	GO Biological Processes	GO:0000022	mitotic spindle elongation	-4.69133	-2.49508	3/9	9055,9493,29127	PRC1,KIF23,RACGAP1
5_Member	GO Biological Processes	GO:0051231	spindle elongation	-4.53846	-2.35072	3/10	9055,9493,29127	PRC1,KIF23,RACGAP1
5_Member	GO Biological Processes	GO:0007018	microtubule-based movement	-4.05303	-1.9439	9/285	1062,4137,9493,9787,9928,10112,11004,29127,55638	CENPE,MAPT,KIF23,DLGAP5,KIF14,KIF20A,KIF2C,RACGAP1,SYBU
5_Member	GO Biological Processes	GO:0032467	positive regulation of cytokinesis	-3.92654	-1.85307	4/40	1894,9493,9928,29127	ECT2,KIF23,KIF14,RACGAP1
5_Member	GO Biological Processes	GO:0030866	cortical actin cytoskeleton organization	-3.80249	-1.74804	4/43	1894,9493,29127,54443	ECT2,KIF23,RACGAP1,ANLN
5_Member	GO Biological Processes	GO:0030865	cortical cytoskeleton organization	-3.61541	-1.59668	4/48	1894,9493,29127,54443	ECT2,KIF23,RACGAP1,ANLN
5_Member	GO Biological Processes	GO:0006890	retrograde vesicle-mediated transport, Golgi to ER	-2.65818	-0.783934	4/86	1062,9493,11004,29127	CENPE,KIF23,KIF2C,RACGAP1
5_Member	GO Biological Processes	GO:0051781	positive regulation of cell division	-2.63985	-0.767654	4/87	1894,9493,9928,29127	ECT2,KIF23,KIF14,RACGAP1
5_Member	GO Biological Processes	GO:0019886	antigen processing and presentation of exogenous peptide antigen via MHC class II	-2.45283	-0.623319	4/98	1062,9493,11004,29127	CENPE,KIF23,KIF2C,RACGAP1
5_Member	GO Biological Processes	GO:0002495	antigen processing and presentation of peptide antigen via MHC class II	-2.40597	-0.581972	4/101	1062,9493,11004,29127	CENPE,KIF23,KIF2C,RACGAP1
5_Member	GO Biological Processes	GO:0002504	antigen processing and presentation of peptide or polysaccharide antigen via MHC class II	-2.39071	-0.570342	4/102	1062,9493,11004,29127	CENPE,KIF23,KIF2C,RACGAP1
5_Member	GO Biological Processes	GO:0090307	mitotic spindle assembly	-2.20411	-0.428412	3/59	4751,9493,29127	NEK2,KIF23,RACGAP1
5_Member	GO Biological Processes	GO:0002478	antigen processing and presentation of exogenous peptide antigen	-1.59496	0	4/175	1062,9493,11004,29127	CENPE,KIF23,KIF2C,RACGAP1
5_Member	GO Biological Processes	GO:0019884	antigen processing and presentation of exogenous antigen	-1.54078	0	4/182	1062,9493,11004,29127	CENPE,KIF23,KIF2C,RACGAP1
5_Member	GO Biological Processes	GO:0048002	antigen processing and presentation of peptide antigen	-1.48201	0	4/190	1062,9493,11004,29127	CENPE,KIF23,KIF2C,RACGAP1
5_Member	GO Biological Processes	GO:0031032	actomyosin structure organization	-1.41289	0	4/200	1894,9493,29127,54443	ECT2,KIF23,RACGAP1,ANLN
6_Summary	GO Biological Processes	GO:0044843	cell cycle G1/S phase transition	-8.14293	-5.417	14/298	596,890,891,1033,4173,4176,5422,6502,6790,7298,9928,27085,81610,144455,5979,3148,4603,7153,9319,57082,63979,259266,580,55771,220042,55638,641,26292,29127,607,2885,4085	BCL2,CCNA2,CCNB1,CDKN3,MCM4,MCM7,POLA1,SKP2,AURKA,TYMS,KIF14,MTBP,FAM83D,E2F7,RET,HMGB2,MYBL1,TOP2A,TRIP13,KNL1,FIGNL1,ASPM,BARD1,PRR11,DDIAS,SYBU,BLM,MYCBP,RACGAP1,BCL9,GRB2,MAD2L1
6_Member	GO Biological Processes	GO:0044843	cell cycle G1/S phase transition	-8.14293	-5.417	14/298	596,890,891,1033,4173,4176,5422,6502,6790,7298,9928,27085,81610,144455	BCL2,CCNA2,CCNB1,CDKN3,MCM4,MCM7,POLA1,SKP2,AURKA,TYMS,KIF14,MTBP,FAM83D,E2F7
6_Member	GO Biological Processes	GO:0000082	G1/S transition of mitotic cell cycle	-6.63521	-4.1422	12/279	596,891,1033,4173,4176,5422,6502,6790,7298,9928,27085,144455	BCL2,CCNB1,CDKN3,MCM4,MCM7,POLA1,SKP2,AURKA,TYMS,KIF14,MTBP,E2F7
6_Member	GO Biological Processes	GO:1903429	regulation of cell maturation	-4.90389	-2.65756	4/23	596,5979,6790,9928	BCL2,RET,AURKA,KIF14
6_Member	GO Biological Processes	GO:1903431	positive regulation of cell maturation	-4.69133	-2.49508	3/9	596,5979,6790	BCL2,RET,AURKA
6_Member	GO Biological Processes	GO:0022412	cellular process involved in reproduction in multicellular organism	-4.01297	-1.9162	10/357	596,891,3148,4603,6790,7153,9319,57082,63979,259266	BCL2,CCNB1,HMGB2,MYBL1,AURKA,TOP2A,TRIP13,KNL1,FIGNL1,ASPM
6_Member	GO Biological Processes	GO:0048469	cell maturation	-3.85695	-1.78671	7/177	596,891,5979,6790,7298,9319,9928	BCL2,CCNB1,RET,AURKA,TYMS,TRIP13,KIF14
6_Member	GO Biological Processes	GO:0007050	cell cycle arrest	-3.8438	-1.78206	8/238	580,891,1033,6790,27085,55771,144455,220042	BARD1,CCNB1,CDKN3,AURKA,MTBP,PRR11,E2F7,DDIAS
6_Member	GO Biological Processes	GO:0048599	oocyte development	-3.68756	-1.65725	4/46	596,891,6790,9319	BCL2,CCNB1,AURKA,TRIP13
6_Member	GO Biological Processes	GO:0048477	oogenesis	-3.63393	-1.60674	5/87	596,891,6790,9319,259266	BCL2,CCNB1,AURKA,TRIP13,ASPM
6_Member	GO Biological Processes	GO:0007292	female gamete generation	-3.63123	-1.60674	6/136	596,891,6790,7153,9319,259266	BCL2,CCNB1,AURKA,TOP2A,TRIP13,ASPM
6_Member	GO Biological Processes	GO:0009994	oocyte differentiation	-3.51314	-1.50008	4/51	596,891,6790,9319	BCL2,CCNB1,AURKA,TRIP13
6_Member	GO Biological Processes	GO:1902806	regulation of cell cycle G1/S phase transition	-3.50577	-1.49798	7/202	596,891,6790,9928,27085,81610,144455	BCL2,CCNB1,AURKA,KIF14,MTBP,FAM83D,E2F7
6_Member	GO Biological Processes	GO:0021700	developmental maturation	-3.32729	-1.33873	8/284	596,891,5979,6790,7298,9319,9928,55638	BCL2,CCNB1,RET,AURKA,TYMS,TRIP13,KIF14,SYBU
6_Member	GO Biological Processes	GO:0044774	mitotic DNA integrity checkpoint	-3.23755	-1.25711	5/106	641,891,6790,7153,144455	BLM,CCNB1,AURKA,TOP2A,E2F7
6_Member	GO Biological Processes	GO:0001556	oocyte maturation	-3.23497	-1.25711	3/26	891,6790,9319	CCNB1,AURKA,TRIP13
6_Member	GO Biological Processes	GO:0071695	anatomical structure maturation	-3.18403	-1.2139	6/165	596,891,5979,6790,7298,9319	BCL2,CCNB1,RET,AURKA,TYMS,TRIP13
6_Member	GO Biological Processes	GO:2000045	regulation of G1/S transition of mitotic cell cycle	-2.93841	-1.00265	6/184	596,891,6790,9928,27085,144455	BCL2,CCNB1,AURKA,KIF14,MTBP,E2F7
6_Member	GO Biological Processes	GO:0007281	germ cell development	-2.84097	-0.937063	7/262	596,891,3148,6790,9319,57082,259266	BCL2,CCNB1,HMGB2,AURKA,TRIP13,KNL1,ASPM
6_Member	GO Biological Processes	GO:0007276	gamete generation	-2.77617	-0.887257	12/698	596,891,3148,4603,6790,7153,9319,26292,29127,57082,63979,259266	BCL2,CCNB1,HMGB2,MYBL1,AURKA,TOP2A,TRIP13,MYCBP,RACGAP1,KNL1,FIGNL1,ASPM
6_Member	GO Biological Processes	GO:0031099	regeneration	-2.77608	-0.887257	6/198	596,607,890,891,6790,7298	BCL2,BCL9,CCNA2,CCNB1,AURKA,TYMS
6_Member	GO Biological Processes	GO:0016572	histone phosphorylation	-2.74794	-0.863338	3/38	890,891,6790	CCNA2,CCNB1,AURKA
6_Member	GO Biological Processes	GO:0031570	DNA integrity checkpoint	-2.48259	-0.647501	5/157	641,891,6790,7153,144455	BLM,CCNB1,AURKA,TOP2A,E2F7
6_Member	GO Biological Processes	GO:0044773	mitotic DNA damage checkpoint	-2.46881	-0.635594	4/97	641,891,6790,144455	BLM,CCNB1,AURKA,E2F7
6_Member	GO Biological Processes	GO:0006977	DNA damage response, signal transduction by p53 class mediator resulting in cell cycle arrest	-2.26733	-0.464693	3/56	891,6790,144455	CCNB1,AURKA,E2F7
6_Member	GO Biological Processes	GO:0072431	signal transduction involved in mitotic G1 DNA damage checkpoint	-2.24585	-0.456888	3/57	891,6790,144455	CCNB1,AURKA,E2F7
6_Member	GO Biological Processes	GO:1902400	intracellular signal transduction involved in G1 DNA damage checkpoint	-2.24585	-0.456888	3/57	891,6790,144455	CCNB1,AURKA,E2F7
6_Member	GO Biological Processes	GO:0072413	signal transduction involved in mitotic cell cycle checkpoint	-2.20411	-0.428412	3/59	891,6790,144455	CCNB1,AURKA,E2F7
6_Member	GO Biological Processes	GO:1902402	signal transduction involved in mitotic DNA damage checkpoint	-2.20411	-0.428412	3/59	891,6790,144455	CCNB1,AURKA,E2F7
6_Member	GO Biological Processes	GO:1902403	signal transduction involved in mitotic DNA integrity checkpoint	-2.20411	-0.428412	3/59	891,6790,144455	CCNB1,AURKA,E2F7
6_Member	GO Biological Processes	GO:0031571	mitotic G1 DNA damage checkpoint	-2.12518	-0.357568	3/63	891,6790,144455	CCNB1,AURKA,E2F7
6_Member	GO Biological Processes	GO:0044819	mitotic G1/S transition checkpoint	-2.12518	-0.357568	3/63	891,6790,144455	CCNB1,AURKA,E2F7
6_Member	GO Biological Processes	GO:0044783	G1 DNA damage checkpoint	-2.10632	-0.34822	3/64	891,6790,144455	CCNB1,AURKA,E2F7
6_Member	GO Biological Processes	GO:2000134	negative regulation of G1/S transition of mitotic cell cycle	-2.08108	-0.33204	4/125	596,891,6790,144455	BCL2,CCNB1,AURKA,E2F7
6_Member	GO Biological Processes	GO:0048232	male gamete generation	-2.01561	-0.27743	9/561	891,3148,4603,9319,26292,29127,57082,63979,259266	CCNB1,HMGB2,MYBL1,TRIP13,MYCBP,RACGAP1,KNL1,FIGNL1,ASPM
6_Member	GO Biological Processes	GO:1902807	negative regulation of cell cycle G1/S phase transition	-2.01126	-0.274575	4/131	596,891,6790,144455	BCL2,CCNB1,AURKA,E2F7
6_Member	GO Biological Processes	GO:0042770	signal transduction in response to DNA damage	-1.98883	-0.255118	4/133	891,2885,6790,144455	CCNB1,GRB2,AURKA,E2F7
6_Member	GO Biological Processes	GO:0048565	digestive tract development	-1.97776	-0.248477	4/134	596,891,5979,7298	BCL2,CCNB1,RET,TYMS
6_Member	GO Biological Processes	GO:0031100	animal organ regeneration	-1.95022	-0.231085	3/73	890,6790,7298	CCNA2,AURKA,TYMS
6_Member	GO Biological Processes	GO:0072401	signal transduction involved in DNA integrity checkpoint	-1.95022	-0.231085	3/73	891,6790,144455	CCNB1,AURKA,E2F7
6_Member	GO Biological Processes	GO:0072422	signal transduction involved in DNA damage checkpoint	-1.95022	-0.231085	3/73	891,6790,144455	CCNB1,AURKA,E2F7
6_Member	GO Biological Processes	GO:0072395	signal transduction involved in cell cycle checkpoint	-1.93423	-0.217955	3/74	891,6790,144455	CCNB1,AURKA,E2F7
6_Member	GO Biological Processes	GO:0000077	DNA damage checkpoint	-1.86224	-0.158591	4/145	641,891,6790,144455	BLM,CCNB1,AURKA,E2F7
6_Member	GO Biological Processes	GO:0055123	digestive system development	-1.85227	-0.149999	4/146	596,891,5979,7298	BCL2,CCNB1,RET,TYMS
6_Member	GO Biological Processes	GO:0031145	anaphase-promoting complex-dependent catabolic process	-1.8288	-0.133375	3/81	891,4085,6790	CCNB1,MAD2L1,AURKA
6_Member	GO Biological Processes	GO:0071158	positive regulation of cell cycle arrest	-1.8146	-0.123222	3/82	891,6790,144455	CCNB1,AURKA,E2F7
6_Member	GO Biological Processes	GO:0007283	spermatogenesis	-1.64533	0	8/543	891,3148,4603,9319,26292,29127,57082,259266	CCNB1,HMGB2,MYBL1,TRIP13,MYCBP,RACGAP1,KNL1,ASPM
6_Member	GO Biological Processes	GO:0003006	developmental process involved in reproduction	-1.54114	0	9/677	596,891,2885,3148,6790,9319,57082,144455,259266	BCL2,CCNB1,GRB2,HMGB2,AURKA,TRIP13,KNL1,E2F7,ASPM
6_Member	GO Biological Processes	GO:0030330	DNA damage response, signal transduction by p53 class mediator	-1.51343	0	3/107	891,6790,144455	CCNB1,AURKA,E2F7
6_Member	GO Biological Processes	GO:0071156	regulation of cell cycle arrest	-1.50316	0	3/108	891,6790,144455	CCNB1,AURKA,E2F7
7_Summary	GO Biological Processes	GO:0051321	meiotic cell cycle	-8.14046	-5.417	13/249	4603,4751,6790,7153,9156,9319,10051,10426,10592,25788,63979,84057,259266	MYBL1,NEK2,AURKA,TOP2A,EXO1,TRIP13,SMC4,TUBGCP3,SMC2,RAD54B,FIGNL1,MND1,ASPM
7_Member	GO Biological Processes	GO:0051321	meiotic cell cycle	-8.14046	-5.417	13/249	4603,4751,6790,7153,9156,9319,10051,10426,10592,25788,63979,84057,259266	MYBL1,NEK2,AURKA,TOP2A,EXO1,TRIP13,SMC4,TUBGCP3,SMC2,RAD54B,FIGNL1,MND1,ASPM
7_Member	GO Biological Processes	GO:0140013	meiotic nuclear division	-6.8126	-4.29327	10/172	4603,6790,7153,9319,10051,10592,25788,63979,84057,259266	MYBL1,AURKA,TOP2A,TRIP13,SMC4,SMC2,RAD54B,FIGNL1,MND1,ASPM
7_Member	GO Biological Processes	GO:1903046	meiotic cell cycle process	-6.45373	-3.97743	10/188	4603,6790,7153,9319,10051,10592,25788,63979,84057,259266	MYBL1,AURKA,TOP2A,TRIP13,SMC4,SMC2,RAD54B,FIGNL1,MND1,ASPM
7_Member	GO Biological Processes	GO:0007127	meiosis I	-4.05106	-1.9439	6/114	4603,6790,7153,9319,25788,84057	MYBL1,AURKA,TOP2A,TRIP13,RAD54B,MND1
7_Member	GO Biological Processes	GO:0061982	meiosis I cell cycle process	-3.94798	-1.86798	6/119	4603,6790,7153,9319,25788,84057	MYBL1,AURKA,TOP2A,TRIP13,RAD54B,MND1
7_Member	GO Biological Processes	GO:0007131	reciprocal meiotic recombination	-3.44855	-1.44937	4/53	7153,9319,25788,84057	TOP2A,TRIP13,RAD54B,MND1
7_Member	GO Biological Processes	GO:0035825	homologous recombination	-3.41726	-1.4208	4/54	7153,9319,25788,84057	TOP2A,TRIP13,RAD54B,MND1
7_Member	GO Biological Processes	GO:0007143	female meiotic nuclear division	-3.00728	-1.06916	3/31	6790,7153,9319	AURKA,TOP2A,TRIP13
7_Member	GO Biological Processes	GO:0007140	male meiotic nuclear division	-2.45618	-0.624822	3/48	4603,9319,63979	MYBL1,TRIP13,FIGNL1
8_Summary	GO Biological Processes	GO:0030261	chromosome condensation	-7.74177	-5.08087	7/47	891,7153,10051,10592,51203,54892,64151,3148,57082,64754,9319	CCNB1,TOP2A,SMC4,SMC2,NUSAP1,NCAPG2,NCAPG,HMGB2,KNL1,SMYD3,TRIP13
8_Member	GO Biological Processes	GO:0030261	chromosome condensation	-7.74177	-5.08087	7/47	891,7153,10051,10592,51203,54892,64151	CCNB1,TOP2A,SMC4,SMC2,NUSAP1,NCAPG2,NCAPG
8_Member	GO Biological Processes	GO:0006323	DNA packaging	-6.01334	-3.61894	10/210	891,3148,7153,10051,10592,51203,54892,57082,64151,64754	CCNB1,HMGB2,TOP2A,SMC4,SMC2,NUSAP1,NCAPG2,KNL1,NCAPG,SMYD3
8_Member	GO Biological Processes	GO:0007076	mitotic chromosome condensation	-5.46165	-3.14363	4/17	10051,10592,51203,64151	SMC4,SMC2,NUSAP1,NCAPG
8_Member	GO Biological Processes	GO:0045132	meiotic chromosome segregation	-2.58628	-0.720156	4/90	7153,9319,10051,10592	TOP2A,TRIP13,SMC4,SMC2
8_Member	GO Biological Processes	GO:0070192	chromosome organization involved in meiotic cell cycle	-2.08779	-0.332815	3/65	9319,10051,10592	TRIP13,SMC4,SMC2
9_Summary	GO Biological Processes	GO:0071479	cellular response to ionizing radiation	-5.22404	-2.93194	6/71	641,1894,2885,23514,63979,64710,5422,10714,596,6506,9768	BLM,ECT2,GRB2,SPIDR,FIGNL1,NUCKS1,POLA1,POLD3,BCL2,SLC1A2,PCLAF
9_Member	GO Biological Processes	GO:0071479	cellular response to ionizing radiation	-5.22404	-2.93194	6/71	641,1894,2885,23514,63979,64710	BLM,ECT2,GRB2,SPIDR,FIGNL1,NUCKS1
9_Member	GO Biological Processes	GO:0071478	cellular response to radiation	-4.49645	-2.31291	8/192	641,1894,2885,5422,10714,23514,63979,64710	BLM,ECT2,GRB2,POLA1,POLD3,SPIDR,FIGNL1,NUCKS1
9_Member	GO Biological Processes	GO:0010212	response to ionizing radiation	-4.34507	-2.18589	7/148	596,641,1894,2885,23514,63979,64710	BCL2,BLM,ECT2,GRB2,SPIDR,FIGNL1,NUCKS1
9_Member	GO Biological Processes	GO:0009314	response to radiation	-3.84756	-1.78206	11/449	596,641,1894,2885,5422,6506,9768,10714,23514,63979,64710	BCL2,BLM,ECT2,GRB2,POLA1,SLC1A2,PCLAF,POLD3,SPIDR,FIGNL1,NUCKS1
9_Member	GO Biological Processes	GO:0071214	cellular response to abiotic stimulus	-2.88035	-0.960808	8/333	641,1894,2885,5422,10714,23514,63979,64710	BLM,ECT2,GRB2,POLA1,POLD3,SPIDR,FIGNL1,NUCKS1
9_Member	GO Biological Processes	GO:0104004	cellular response to environmental stimulus	-2.88035	-0.960808	8/333	641,1894,2885,5422,10714,23514,63979,64710	BLM,ECT2,GRB2,POLA1,POLD3,SPIDR,FIGNL1,NUCKS1
10_Summary	GO Biological Processes	GO:0051383	kinetochore organization	-5.06973	-2.7912	4/21	1062,1063,10051,10592,57082	CENPE,CENPF,SMC4,SMC2,KNL1
10_Member	GO Biological Processes	GO:0051383	kinetochore organization	-5.06973	-2.7912	4/21	1062,1063,10051,10592	CENPE,CENPF,SMC4,SMC2
10_Member	GO Biological Processes	GO:0034508	centromere complex assembly	-2.26733	-0.464693	3/56	1062,1063,57082	CENPE,CENPF,KNL1
11_Summary	GO Biological Processes	GO:0006265	DNA topological change	-4.69133	-2.49508	3/9	3146,3148,7153,1062,1063,4173,4176,5757,57082,64754,7374,9156,10622,56919,596,857,4751,6790,7074,64710,3720,6229,54892	HMGB1,HMGB2,TOP2A,CENPE,CENPF,MCM4,MCM7,PTMA,KNL1,SMYD3,UNG,EXO1,POLR3G,DHX33,BCL2,CAV1,NEK2,AURKA,TIAM1,NUCKS1,JARID2,RPS24,NCAPG2
11_Member	GO Biological Processes	GO:0006265	DNA topological change	-4.69133	-2.49508	3/9	3146,3148,7153	HMGB1,HMGB2,TOP2A
11_Member	GO Biological Processes	GO:0071824	protein-DNA complex subunit organization	-4.01848	-1.9162	9/288	1062,1063,3146,3148,4173,4176,5757,57082,64754	CENPE,CENPF,HMGB1,HMGB2,MCM4,MCM7,PTMA,KNL1,SMYD3
11_Member	GO Biological Processes	GO:0006266	DNA ligation	-3.79928	-1.74792	3/17	3146,3148,7153	HMGB1,HMGB2,TOP2A
11_Member	GO Biological Processes	GO:0065004	protein-DNA complex assembly	-3.72173	-1.68847	8/248	1062,1063,3146,3148,4173,4176,57082,64754	CENPE,CENPF,HMGB1,HMGB2,MCM4,MCM7,KNL1,SMYD3
11_Member	GO Biological Processes	GO:0002562	somatic diversification of immune receptors via germline recombination within a single locus	-3.13554	-1.17551	4/64	3146,3148,7374,9156	HMGB1,HMGB2,UNG,EXO1
11_Member	GO Biological Processes	GO:0016444	somatic cell DNA recombination	-3.13554	-1.17551	4/64	3146,3148,7374,9156	HMGB1,HMGB2,UNG,EXO1
11_Member	GO Biological Processes	GO:0030262	apoptotic nuclear changes	-2.85215	-0.946035	3/35	3146,3148,7153	HMGB1,HMGB2,TOP2A
11_Member	GO Biological Processes	GO:0002200	somatic diversification of immune receptors	-2.83479	-0.935238	4/77	3146,3148,7374,9156	HMGB1,HMGB2,UNG,EXO1
11_Member	GO Biological Processes	GO:0032481	positive regulation of type I interferon production	-2.83479	-0.935238	4/77	3146,3148,10622,56919	HMGB1,HMGB2,POLR3G,DHX33
11_Member	GO Biological Processes	GO:0006921	cellular component disassembly involved in execution phase of apoptosis	-2.78165	-0.888572	3/37	3146,3148,7153	HMGB1,HMGB2,TOP2A
11_Member	GO Biological Processes	GO:0051098	regulation of binding	-2.56674	-0.70859	8/374	596,857,3146,3148,4751,6790,7074,64710	BCL2,CAV1,HMGB1,HMGB2,NEK2,AURKA,TIAM1,NUCKS1
11_Member	GO Biological Processes	GO:0006338	chromatin remodeling	-2.2123	-0.430023	5/182	3146,3148,3720,5757,57082	HMGB1,HMGB2,JARID2,PTMA,KNL1
11_Member	GO Biological Processes	GO:0032479	regulation of type I interferon production	-2.06917	-0.326478	4/126	3146,3148,10622,56919	HMGB1,HMGB2,POLR3G,DHX33
11_Member	GO Biological Processes	GO:0032606	type I interferon production	-2.04568	-0.306006	4/128	3146,3148,10622,56919	HMGB1,HMGB2,POLR3G,DHX33
11_Member	GO Biological Processes	GO:0002262	myeloid cell homeostasis	-1.83257	-0.135084	4/148	3146,3148,6229,54892	HMGB1,HMGB2,RPS24,NCAPG2
11_Member	GO Biological Processes	GO:0097194	execution phase of apoptosis	-1.69511	-0.0260159	3/91	3146,3148,7153	HMGB1,HMGB2,TOP2A
11_Member	GO Biological Processes	GO:0048872	homeostasis of number of cells	-1.68337	-0.0168193	5/247	596,3146,3148,6229,54892	BCL2,HMGB1,HMGB2,RPS24,NCAPG2
11_Member	GO Biological Processes	GO:0051099	positive regulation of binding	-1.56367	0	4/179	857,3146,3148,7074	CAV1,HMGB1,HMGB2,TIAM1
11_Member	GO Biological Processes	GO:0034728	nucleosome organization	-1.52578	0	4/184	3148,5757,57082,64754	HMGB2,PTMA,KNL1,SMYD3
11_Member	GO Biological Processes	GO:0034101	erythrocyte homeostasis	-1.36161	0	3/123	3148,6229,54892	HMGB2,RPS24,NCAPG2
11_Member	GO Biological Processes	GO:0051101	regulation of DNA binding	-1.35293	0	3/124	3146,3148,4751	HMGB1,HMGB2,NEK2
12_Summary	GO Biological Processes	GO:0051642	centrosome localization	-4.48824	-2.30886	4/29	4085,6790,29899,259266,51203,580,857,10268,54443,57217	MAD2L1,AURKA,GPSM2,ASPM,NUSAP1,BARD1,CAV1,RAMP3,ANLN,TTC7A
12_Member	GO Biological Processes	GO:0051642	centrosome localization	-4.48824	-2.30886	4/29	4085,6790,29899,259266	MAD2L1,AURKA,GPSM2,ASPM
12_Member	GO Biological Processes	GO:0061842	microtubule organizing center localization	-4.42823	-2.25704	4/30	4085,6790,29899,259266	MAD2L1,AURKA,GPSM2,ASPM
12_Member	GO Biological Processes	GO:0051653	spindle localization	-3.61541	-1.59668	4/48	4085,29899,51203,259266	MAD2L1,GPSM2,NUSAP1,ASPM
12_Member	GO Biological Processes	GO:0040001	establishment of mitotic spindle localization	-2.92716	-0.993756	3/33	4085,29899,51203	MAD2L1,GPSM2,NUSAP1
12_Member	GO Biological Processes	GO:0051293	establishment of spindle localization	-2.59276	-0.724624	3/43	4085,29899,51203	MAD2L1,GPSM2,NUSAP1
12_Member	GO Biological Processes	GO:0051651	maintenance of location in cell	-2.50136	-0.65872	4/95	580,857,29899,259266	BARD1,CAV1,GPSM2,ASPM
12_Member	GO Biological Processes	GO:1990778	protein localization to cell periphery	-1.30659	0	5/313	857,10268,29899,54443,57217	CAV1,RAMP3,GPSM2,ANLN,TTC7A
13_Summary	GO Biological Processes	GO:0031109	microtubule polymerization or depolymerization	-4.05106	-1.9439	6/114	4137,9928,10426,11004,50861,55835,63979,596,2885	MAPT,KIF14,TUBGCP3,KIF2C,STMN3,CENPJ,FIGNL1,BCL2,GRB2
13_Member	GO Biological Processes	GO:0031109	microtubule polymerization or depolymerization	-4.05106	-1.9439	6/114	4137,9928,10426,11004,50861,55835	MAPT,KIF14,TUBGCP3,KIF2C,STMN3,CENPJ
13_Member	GO Biological Processes	GO:0031122	cytoplasmic microtubule organization	-3.44855	-1.44937	4/53	4137,10426,50861,63979	MAPT,TUBGCP3,STMN3,FIGNL1
13_Member	GO Biological Processes	GO:0046785	microtubule polymerization	-1.88771	-0.179891	3/77	4137,10426,55835	MAPT,TUBGCP3,CENPJ
13_Member	GO Biological Processes	GO:0097435	supramolecular fiber organization	-1.55178	0	9/674	596,2885,4137,9928,10426,11004,50861,55835,63979	BCL2,GRB2,MAPT,KIF14,TUBGCP3,KIF2C,STMN3,CENPJ,FIGNL1
14_Summary	GO Biological Processes	GO:0006412	translation	-3.72303	-1.68847	14/715	1933,1964,4736,5935,6129,6189,6229,7298,23107,55037,55157,56919,64432,79731	EEF1B2,EIF1AX,RPL10A,RBM3,RPL7,RPS3A,RPS24,TYMS,MRPS27,PTCD3,DARS2,DHX33,MRPS25,NARS2
14_Member	GO Biological Processes	GO:0006412	translation	-3.72303	-1.68847	14/715	1933,1964,4736,5935,6129,6189,6229,7298,23107,55037,55157,56919,64432,79731	EEF1B2,EIF1AX,RPL10A,RBM3,RPL7,RPS3A,RPS24,TYMS,MRPS27,PTCD3,DARS2,DHX33,MRPS25,NARS2
14_Member	GO Biological Processes	GO:0043043	peptide biosynthetic process	-3.57098	-1.55509	14/740	1933,1964,4736,5935,6129,6189,6229,7298,23107,55037,55157,56919,64432,79731	EEF1B2,EIF1AX,RPL10A,RBM3,RPL7,RPS3A,RPS24,TYMS,MRPS27,PTCD3,DARS2,DHX33,MRPS25,NARS2
14_Member	GO Biological Processes	GO:0006414	translational elongation	-1.97776	-0.248477	4/134	1933,23107,55037,64432	EEF1B2,MRPS27,PTCD3,MRPS25
14_Member	GO Biological Processes	GO:0032543	mitochondrial translation	-1.9668	-0.241551	4/135	23107,55037,55157,64432	MRPS27,PTCD3,DARS2,MRPS25
14_Member	GO Biological Processes	GO:0070125	mitochondrial translational elongation	-1.72044	-0.0474972	3/89	23107,55037,64432	MRPS27,PTCD3,MRPS25
14_Member	GO Biological Processes	GO:0070126	mitochondrial translational termination	-1.72044	-0.0474972	3/89	23107,55037,64432	MRPS27,PTCD3,MRPS25
14_Member	GO Biological Processes	GO:0140053	mitochondrial gene expression	-1.70322	-0.0315591	4/162	23107,55037,55157,64432	MRPS27,PTCD3,DARS2,MRPS25
14_Member	GO Biological Processes	GO:0006415	translational termination	-1.54494	0	3/104	23107,55037,64432	MRPS27,PTCD3,MRPS25
15_Summary	GO Biological Processes	GO:0051782	negative regulation of cell division	-3.72212	-1.68847	3/18	641,144455,259266	BLM,E2F7,ASPM
15_Member	GO Biological Processes	GO:0051782	negative regulation of cell division	-3.72212	-1.68847	3/18	641,144455,259266	BLM,E2F7,ASPM
16_Summary	GO Biological Processes	GO:2001020	regulation of response to DNA damage stimulus	-3.35508	-1.36133	7/214	596,3146,4137,23201,23514,63979,220042,857,4927,7074,55074	BCL2,HMGB1,MAPT,FAM168A,SPIDR,FIGNL1,DDIAS,CAV1,NUP88,TIAM1,OXR1
16_Member	GO Biological Processes	GO:2001020	regulation of response to DNA damage stimulus	-3.35508	-1.36133	7/214	596,3146,4137,23201,23514,63979,220042	BCL2,HMGB1,MAPT,FAM168A,SPIDR,FIGNL1,DDIAS
16_Member	GO Biological Processes	GO:0006282	regulation of DNA repair	-2.11751	-0.354679	4/122	3146,23201,23514,63979	HMGB1,FAM168A,SPIDR,FIGNL1
16_Member	GO Biological Processes	GO:0045739	positive regulation of DNA repair	-2.08779	-0.332815	3/65	3146,23201,23514	HMGB1,FAM168A,SPIDR
16_Member	GO Biological Processes	GO:0080135	regulation of cellular response to stress	-2.08083	-0.33204	11/749	596,857,3146,4137,4927,7074,23201,23514,55074,63979,220042	BCL2,CAV1,HMGB1,MAPT,NUP88,TIAM1,FAM168A,SPIDR,OXR1,FIGNL1,DDIAS
16_Member	GO Biological Processes	GO:2001022	positive regulation of response to DNA damage stimulus	-1.62286	0	3/97	3146,23201,23514	HMGB1,FAM168A,SPIDR
17_Summary	GO Biological Processes	GO:2001236	regulation of extrinsic apoptotic signaling pathway	-3.32712	-1.33873	6/155	596,857,3148,5979,11124,64798,63979,220042,9833	BCL2,CAV1,HMGB2,RET,FAF1,DEPTOR,FIGNL1,DDIAS,MELK
17_Member	GO Biological Processes	GO:2001236	regulation of extrinsic apoptotic signaling pathway	-3.32712	-1.33873	6/155	596,857,3148,5979,11124,64798	BCL2,CAV1,HMGB2,RET,FAF1,DEPTOR
17_Member	GO Biological Processes	GO:0097191	extrinsic apoptotic signaling pathway	-2.50872	-0.662247	6/224	596,857,3148,5979,11124,64798	BCL2,CAV1,HMGB2,RET,FAF1,DEPTOR
17_Member	GO Biological Processes	GO:2001238	positive regulation of extrinsic apoptotic signaling pathway	-2.43075	-0.603081	3/49	857,5979,11124	CAV1,RET,FAF1
17_Member	GO Biological Processes	GO:2001233	regulation of apoptotic signaling pathway	-2.35202	-0.533455	8/406	596,857,3148,5979,11124,63979,64798,220042	BCL2,CAV1,HMGB2,RET,FAF1,FIGNL1,DEPTOR,DDIAS
17_Member	GO Biological Processes	GO:0097190	apoptotic signaling pathway	-1.83187	-0.135084	9/602	596,857,3148,5979,9833,11124,63979,64798,220042	BCL2,CAV1,HMGB2,RET,MELK,FAF1,FIGNL1,DEPTOR,DDIAS
17_Member	GO Biological Processes	GO:0008625	extrinsic apoptotic signaling pathway via death domain receptors	-1.75971	-0.0773767	3/86	596,3148,11124	BCL2,HMGB2,FAF1
17_Member	GO Biological Processes	GO:2001242	regulation of intrinsic apoptotic signaling pathway	-1.67729	-0.0120122	4/165	596,857,63979,220042	BCL2,CAV1,FIGNL1,DDIAS
17_Member	GO Biological Processes	GO:2001243	negative regulation of intrinsic apoptotic signaling pathway	-1.61133	0	3/98	596,63979,220042	BCL2,FIGNL1,DDIAS
17_Member	GO Biological Processes	GO:2001235	positive regulation of apoptotic signaling pathway	-1.56367	0	4/179	596,857,5979,11124	BCL2,CAV1,RET,FAF1
17_Member	GO Biological Processes	GO:0097193	intrinsic apoptotic signaling pathway	-1.42982	0	5/289	596,857,9833,63979,220042	BCL2,CAV1,MELK,FIGNL1,DDIAS
18_Summary	GO Biological Processes	GO:0033138	positive regulation of peptidyl-serine phosphorylation	-3.25634	-1.27223	5/105	596,857,5979,10268,64754,891,6790,641,760,890,1894,4137,8836,23514,3148,6502,7298,2885,3146,64710	BCL2,CAV1,RET,RAMP3,SMYD3,CCNB1,AURKA,BLM,CA2,CCNA2,ECT2,MAPT,GGH,SPIDR,HMGB2,SKP2,TYMS,GRB2,HMGB1,NUCKS1
18_Member	GO Biological Processes	GO:0033138	positive regulation of peptidyl-serine phosphorylation	-3.25634	-1.27223	5/105	596,857,5979,10268,64754	BCL2,CAV1,RET,RAMP3,SMYD3
18_Member	GO Biological Processes	GO:0033135	regulation of peptidyl-serine phosphorylation	-2.71136	-0.832999	5/139	596,857,5979,10268,64754	BCL2,CAV1,RET,RAMP3,SMYD3
18_Member	GO Biological Processes	GO:0018105	peptidyl-serine phosphorylation	-2.51881	-0.670418	7/299	596,857,891,5979,6790,10268,64754	BCL2,CAV1,CCNB1,RET,AURKA,RAMP3,SMYD3
18_Member	GO Biological Processes	GO:0010035	response to inorganic substance	-2.49874	-0.658001	10/562	596,641,760,857,890,891,1894,4137,8836,23514	BCL2,BLM,CA2,CAV1,CCNA2,CCNB1,ECT2,MAPT,GGH,SPIDR
18_Member	GO Biological Processes	GO:0018209	peptidyl-serine modification	-2.34328	-0.528308	7/322	596,857,891,5979,6790,10268,64754	BCL2,CAV1,CCNB1,RET,AURKA,RAMP3,SMYD3
18_Member	GO Biological Processes	GO:0010038	response to metal ion	-2.06189	-0.320704	7/364	596,760,857,891,1894,4137,8836	BCL2,CA2,CAV1,CCNB1,ECT2,MAPT,GGH
18_Member	GO Biological Processes	GO:0048545	response to steroid hormone	-1.93718	-0.219474	7/385	596,760,857,3148,6502,7298,64754	BCL2,CA2,CAV1,HMGB2,SKP2,TYMS,SMYD3
18_Member	GO Biological Processes	GO:0071407	cellular response to organic cyclic compound	-1.64952	0	8/542	641,857,890,891,6502,10268,23514,64754	BLM,CAV1,CCNA2,CCNB1,SKP2,RAMP3,SPIDR,SMYD3
18_Member	GO Biological Processes	GO:0010522	regulation of calcium ion transport into cytosol	-1.56655	0	3/102	596,857,10268	BCL2,CAV1,RAMP3
18_Member	GO Biological Processes	GO:0031623	receptor internalization	-1.46319	0	3/112	857,2885,10268	CAV1,GRB2,RAMP3
18_Member	GO Biological Processes	GO:2000377	regulation of reactive oxygen species metabolic process	-1.44688	0	4/195	596,857,2885,4137	BCL2,CAV1,GRB2,MAPT
18_Member	GO Biological Processes	GO:0071396	cellular response to lipid	-1.38956	0	8/610	890,891,3146,3148,5979,6502,10268,64754	CCNA2,CCNB1,HMGB1,HMGB2,RET,SKP2,RAMP3,SMYD3
18_Member	GO Biological Processes	GO:1901652	response to peptide	-1.30362	0	7/524	760,857,890,2885,8836,10268,64710	CA2,CAV1,CCNA2,GRB2,GGH,RAMP3,NUCKS1
19_Summary	GO Biological Processes	GO:0045859	regulation of protein kinase activity	-3.25532	-1.27223	14/796	641,857,890,891,1033,1062,1894,5979,7074,9928,11124,54892,64754,64798,4137,4751,5983,5985,79075,2885,29127,29899,50861,51195	BLM,CAV1,CCNA2,CCNB1,CDKN3,CENPE,ECT2,RET,TIAM1,KIF14,FAF1,NCAPG2,SMYD3,DEPTOR,MAPT,NEK2,RFC3,RFC5,DSCC1,GRB2,RACGAP1,GPSM2,STMN3,RAPGEFL1
19_Member	GO Biological Processes	GO:0045859	regulation of protein kinase activity	-3.25532	-1.27223	14/796	641,857,890,891,1033,1062,1894,5979,7074,9928,11124,54892,64754,64798	BLM,CAV1,CCNA2,CCNB1,CDKN3,CENPE,ECT2,RET,TIAM1,KIF14,FAF1,NCAPG2,SMYD3,DEPTOR
19_Member	GO Biological Processes	GO:0051347	positive regulation of transferase activity	-3.03246	-1.08716	12/651	891,1062,1894,4137,4751,5979,5983,5985,7074,9928,54892,79075	CCNB1,CENPE,ECT2,MAPT,NEK2,RET,RFC3,RFC5,TIAM1,KIF14,NCAPG2,DSCC1
19_Member	GO Biological Processes	GO:0007264	small GTPase mediated signal transduction	-1.96438	-0.240923	9/572	890,1894,2885,7074,9928,29127,29899,50861,51195	CCNA2,ECT2,GRB2,TIAM1,KIF14,RACGAP1,GPSM2,STMN3,RAPGEFL1
19_Member	GO Biological Processes	GO:0046578	regulation of Ras protein signal transduction	-1.73824	-0.0587995	5/239	1894,2885,7074,9928,50861	ECT2,GRB2,TIAM1,KIF14,STMN3
19_Member	GO Biological Processes	GO:0051056	regulation of small GTPase mediated signal transduction	-1.67363	-0.0108692	6/339	1894,2885,7074,9928,29127,50861	ECT2,GRB2,TIAM1,KIF14,RACGAP1,STMN3
19_Member	GO Biological Processes	GO:0007265	Ras protein signal transduction	-1.6095	0	7/449	890,1894,2885,7074,9928,29899,50861	CCNA2,ECT2,GRB2,TIAM1,KIF14,GPSM2,STMN3
19_Member	GO Biological Processes	GO:0033674	positive regulation of kinase activity	-1.51733	0	8/575	891,1062,1894,4137,5979,7074,9928,54892	CCNB1,CENPE,ECT2,MAPT,RET,TIAM1,KIF14,NCAPG2
20_Summary	GO Biological Processes	GO:0045931	positive regulation of mitotic cell cycle	-3.21182	-1.23655	6/163	891,4085,6790,9787,27085,51203,81610,3720,4751	CCNB1,MAD2L1,AURKA,DLGAP5,MTBP,NUSAP1,FAM83D,JARID2,NEK2
20_Member	GO Biological Processes	GO:0045931	positive regulation of mitotic cell cycle	-3.21182	-1.23655	6/163	891,4085,6790,9787,27085,51203	CCNB1,MAD2L1,AURKA,DLGAP5,MTBP,NUSAP1
20_Member	GO Biological Processes	GO:0045840	positive regulation of mitotic nuclear division	-2.33443	-0.521694	3/53	6790,9787,51203	AURKA,DLGAP5,NUSAP1
20_Member	GO Biological Processes	GO:1901989	positive regulation of cell cycle phase transition	-2.33134	-0.521694	4/106	891,9787,27085,81610	CCNB1,DLGAP5,MTBP,FAM83D
20_Member	GO Biological Processes	GO:0051785	positive regulation of nuclear division	-2.06958	-0.326478	3/66	6790,9787,51203	AURKA,DLGAP5,NUSAP1
20_Member	GO Biological Processes	GO:1901992	positive regulation of mitotic cell cycle phase transition	-1.69511	-0.0260159	3/91	891,9787,27085	CCNB1,DLGAP5,MTBP
20_Member	GO Biological Processes	GO:2001252	positive regulation of chromosome organization	-1.60292	0	4/174	891,3720,4751,9787	CCNB1,JARID2,NEK2,DLGAP5

## Sheet: Annotation_up_both
Input ID	Gene ID	Type	Tax ID	Homologene Gene ID	Homologene Gene Tax ID	GO:0060337 type I interferon signaling pa	GO:0034341 response to interferon-gamma	GO:0002483 antigen processing and present	GO:0002274 myeloid leukocyte activation	GO:0045088 regulation of innate immune re	GO:0007249 I-kappaB kinase/NF-kappaB sign	GO:0035456 response to interferon-beta	GO:0001817 regulation of cytokine product	GO:0006986 response to unfolded protein	GO:0051701 interaction with host	GO:0009617 response to bacterium	GO:0010506 regulation of autophagy	GO:0030099 myeloid cell differentiation	GO:0007041 lysosomal transport	GO:0006471 protein ADP-ribosylation	GO:0050688 regulation of defense response	GO:0055072 iron ion homeostasis	GO:0043902 positive regulation of multi-o	GO:1903321 negative regulation of protein	GO:0035455 response to interferon-alpha
ADAR	103	symbol	H. sapiens	103	H. sapiens	1.0	0.0	0.0	0.0	1.0	0.0	0.0	0.0	0.0	0.0	0.0	0.0	1.0	0.0	0.0	0.0	0.0	1.0	0.0	1.0
HSPH1	10808	symbol	H. sapiens	10808	H. sapiens	0.0	0.0	0.0	0.0	0.0	0.0	0.0	0.0	1.0	0.0	0.0	0.0	0.0	0.0	0.0	0.0	0.0	0.0	0.0	0.0
SEC24C	9632	symbol	H. sapiens	9632	H. sapiens	0.0	0.0	1.0	0.0	0.0	0.0	0.0	0.0	0.0	0.0	0.0	0.0	0.0	0.0	0.0	0.0	0.0	0.0	0.0	0.0
CDH3	1001	symbol	H. sapiens	1001	H. sapiens	0.0	0.0	0.0	0.0	0.0	0.0	0.0	1.0	0.0	0.0	0.0	0.0	0.0	0.0	0.0	0.0	1.0	0.0	0.0	0.0
DTX3L	151636	symbol	H. sapiens	151636	H. sapiens	1.0	0.0	0.0	0.0	0.0	0.0	0.0	0.0	0.0	0.0	0.0	1.0	0.0	1.0	0.0	1.0	0.0	0.0	1.0	0.0
CD47	961	symbol	H. sapiens	961	H. sapiens	0.0	1.0	0.0	1.0	1.0	0.0	0.0	1.0	0.0	0.0	1.0	0.0	0.0	0.0	0.0	1.0	0.0	0.0	0.0	0.0
BIRC6	57448	symbol	H. sapiens	57448	H. sapiens	0.0	0.0	0.0	0.0	0.0	0.0	0.0	0.0	0.0	0.0	0.0	0.0	0.0	0.0	0.0	0.0	0.0	0.0	0.0	0.0
DYNC1H1	1778	symbol	H. sapiens	1778	H. sapiens	0.0	0.0	1.0	1.0	0.0	0.0	0.0	0.0	0.0	0.0	0.0	0.0	0.0	0.0	0.0	0.0	1.0	0.0	0.0	0.0
DNAJA1	3301	symbol	H. sapiens	3301	H. sapiens	0.0	0.0	0.0	0.0	0.0	0.0	0.0	0.0	1.0	0.0	0.0	0.0	0.0	0.0	0.0	0.0	0.0	0.0	1.0	0.0
LINC00963	100506190	symbol	H. sapiens	100506190	H. sapiens	0.0	0.0	0.0	0.0	0.0	0.0	0.0	0.0	0.0	0.0	0.0	0.0	0.0	0.0	0.0	0.0	0.0	0.0	0.0	0.0
CLIP1	6249	symbol	H. sapiens	6249	H. sapiens	0.0	0.0	0.0	0.0	0.0	0.0	0.0	0.0	0.0	0.0	0.0	1.0	0.0	0.0	0.0	0.0	0.0	0.0	0.0	0.0
AC239868.2						nan	nan	nan	nan	nan	nan	nan	nan	nan	nan	nan	nan	nan	nan	nan	nan	nan	nan	nan	nan
HSPB8	26353	symbol	H. sapiens	26353	H. sapiens	0.0	0.0	0.0	0.0	0.0	0.0	0.0	0.0	1.0	0.0	0.0	1.0	0.0	0.0	0.0	0.0	0.0	0.0	0.0	0.0
TFE3	7030	symbol	H. sapiens	7030	H. sapiens	0.0	0.0	1.0	0.0	0.0	0.0	0.0	0.0	0.0	0.0	0.0	0.0	1.0	0.0	0.0	0.0	1.0	0.0	0.0	0.0
TNIP1	10318	symbol	H. sapiens	10318	H. sapiens	1.0	0.0	0.0	0.0	1.0	1.0	0.0	0.0	0.0	1.0	0.0	0.0	0.0	0.0	0.0	0.0	0.0	0.0	1.0	0.0
TDRD7	23424	symbol	H. sapiens	23424	H. sapiens	0.0	0.0	0.0	0.0	0.0	0.0	0.0	0.0	0.0	0.0	0.0	0.0	0.0	0.0	0.0	0.0	0.0	0.0	0.0	0.0
MYD88	4615	symbol	H. sapiens	4615	H. sapiens	1.0	0.0	0.0	0.0	1.0	1.0	0.0	1.0	0.0	0.0	1.0	0.0	0.0	0.0	0.0	0.0	0.0	0.0	0.0	0.0
CTSH	1512	symbol	H. sapiens	1512	H. sapiens	0.0	0.0	1.0	1.0	1.0	0.0	0.0	0.0	0.0	0.0	0.0	0.0	0.0	0.0	0.0	0.0	1.0	0.0	0.0	0.0
PPL	5493	symbol	H. sapiens	5493	H. sapiens	0.0	0.0	0.0	0.0	1.0	0.0	0.0	0.0	0.0	0.0	0.0	0.0	0.0	0.0	0.0	0.0	0.0	0.0	0.0	0.0
ERN1	2081	symbol	H. sapiens	2081	H. sapiens	0.0	0.0	0.0	0.0	0.0	0.0	0.0	0.0	1.0	0.0	0.0	1.0	0.0	0.0	0.0	0.0	0.0	0.0	0.0	0.0
HIST1H2AC	8334	gene_synonym	H. sapiens	8334	H. sapiens	0.0	0.0	0.0	0.0	0.0	0.0	0.0	0.0	0.0	0.0	0.0	0.0	0.0	0.0	0.0	0.0	0.0	0.0	0.0	0.0
KIF13A	63971	symbol	H. sapiens	63971	H. sapiens	0.0	0.0	1.0	0.0	0.0	0.0	0.0	0.0	0.0	0.0	0.0	1.0	0.0	1.0	0.0	0.0	0.0	0.0	0.0	0.0
TAP2	6891	symbol	H. sapiens	6891	H. sapiens	0.0	0.0	1.0	0.0	0.0	0.0	0.0	0.0	0.0	0.0	0.0	0.0	0.0	0.0	0.0	0.0	0.0	0.0	0.0	0.0
IGF2R	3482	symbol	H. sapiens	3482	H. sapiens	1.0	0.0	0.0	1.0	0.0	0.0	0.0	0.0	0.0	0.0	0.0	0.0	0.0	1.0	0.0	0.0	0.0	1.0	0.0	0.0
NFKBIA	4792	symbol	H. sapiens	4792	H. sapiens	1.0	0.0	0.0	0.0	1.0	1.0	0.0	0.0	0.0	0.0	1.0	0.0	1.0	0.0	0.0	0.0	0.0	0.0	0.0	0.0
GOLGA3	2802	symbol	H. sapiens	2802	H. sapiens	0.0	0.0	0.0	0.0	0.0	0.0	0.0	0.0	0.0	0.0	0.0	0.0	0.0	0.0	0.0	0.0	0.0	0.0	0.0	0.0
HERC6	55008	symbol	H. sapiens	55008	H. sapiens	0.0	0.0	0.0	0.0	0.0	0.0	0.0	0.0	0.0	0.0	1.0	0.0	0.0	0.0	0.0	0.0	0.0	0.0	0.0	0.0
CSTB	1476	symbol	H. sapiens	1476	H. sapiens	0.0	0.0	0.0	1.0	0.0	0.0	0.0	0.0	0.0	0.0	0.0	0.0	0.0	0.0	0.0	0.0	0.0	0.0	0.0	0.0
MAP7D1	55700	symbol	H. sapiens	55700	H. sapiens	0.0	0.0	0.0	0.0	0.0	0.0	0.0	0.0	0.0	0.0	0.0	0.0	0.0	0.0	0.0	0.0	0.0	0.0	0.0	0.0
P4HA2	8974	symbol	H. sapiens	8974	H. sapiens	0.0	0.0	0.0	0.0	0.0	0.0	0.0	0.0	0.0	0.0	0.0	0.0	0.0	0.0	0.0	0.0	0.0	0.0	0.0	0.0
ARID5B	84159	symbol	H. sapiens	84159	H. sapiens	0.0	0.0	0.0	0.0	0.0	1.0	0.0	0.0	0.0	0.0	0.0	0.0	0.0	0.0	0.0	0.0	0.0	0.0	0.0	0.0
ATP6AP1	537	symbol	H. sapiens	537	H. sapiens	0.0	0.0	0.0	0.0	0.0	0.0	0.0	0.0	0.0	0.0	0.0	0.0	1.0	0.0	0.0	0.0	1.0	0.0	0.0	0.0
CGN	57530	symbol	H. sapiens	57530	H. sapiens	0.0	0.0	0.0	0.0	0.0	0.0	0.0	0.0	0.0	0.0	0.0	0.0	0.0	0.0	0.0	0.0	0.0	0.0	0.0	0.0
CHMP5	51510	symbol	H. sapiens	51510	H. sapiens	1.0	0.0	1.0	0.0	0.0	0.0	0.0	0.0	0.0	0.0	1.0	0.0	0.0	1.0	0.0	0.0	0.0	0.0	0.0	0.0
STAT1	6772	symbol	H. sapiens	6772	H. sapiens	1.0	1.0	0.0	0.0	1.0	1.0	1.0	1.0	0.0	0.0	1.0	0.0	1.0	0.0	0.0	1.0	0.0	0.0	0.0	0.0
OGFR	11054	symbol	H. sapiens	11054	H. sapiens	0.0	0.0	0.0	0.0	0.0	0.0	0.0	0.0	0.0	0.0	0.0	0.0	0.0	0.0	0.0	0.0	0.0	0.0	0.0	0.0
PARP12	64761	symbol	H. sapiens	64761	H. sapiens	0.0	0.0	0.0	0.0	0.0	0.0	0.0	0.0	0.0	0.0	0.0	0.0	0.0	0.0	1.0	0.0	0.0	0.0	0.0	0.0
BST2	684	symbol	H. sapiens	684	H. sapiens	1.0	1.0	0.0	1.0	0.0	1.0	1.0	1.0	0.0	0.0	0.0	0.0	0.0	0.0	0.0	1.0	0.0	0.0	0.0	1.0
FAM50A	9130	symbol	H. sapiens	9130	H. sapiens	0.0	0.0	0.0	0.0	0.0	0.0	0.0	0.0	0.0	0.0	0.0	0.0	0.0	0.0	0.0	0.0	0.0	0.0	0.0	0.0
RHOC	389	symbol	H. sapiens	389	H. sapiens	0.0	0.0	0.0	0.0	0.0	1.0	0.0	0.0	0.0	0.0	0.0	0.0	0.0	0.0	0.0	0.0	0.0	0.0	0.0	0.0
NAGLU	4669	symbol	H. sapiens	4669	H. sapiens	0.0	0.0	0.0	0.0	0.0	0.0	0.0	0.0	0.0	0.0	0.0	0.0	0.0	1.0	0.0	0.0	0.0	0.0	0.0	0.0
SCARB2	950	symbol	H. sapiens	950	H. sapiens	1.0	0.0	1.0	0.0	0.0	0.0	0.0	0.0	0.0	1.0	0.0	0.0	0.0	1.0	0.0	0.0	0.0	0.0	0.0	0.0
WBP2	23558	symbol	H. sapiens	23558	H. sapiens	0.0	0.0	0.0	0.0	0.0	0.0	0.0	0.0	0.0	0.0	0.0	0.0	0.0	0.0	0.0	0.0	0.0	0.0	0.0	0.0
DDX60	55601	symbol	H. sapiens	55601	H. sapiens	1.0	0.0	0.0	0.0	1.0	0.0	0.0	1.0	0.0	0.0	0.0	0.0	0.0	0.0	0.0	1.0	0.0	1.0	0.0	0.0
PLXNB2	23654	symbol	H. sapiens	23654	H. sapiens	0.0	0.0	0.0	0.0	0.0	0.0	0.0	0.0	0.0	0.0	0.0	0.0	0.0	0.0	0.0	0.0	0.0	0.0	0.0	0.0
PPP3CA	5530	symbol	H. sapiens	5530	H. sapiens	0.0	0.0	0.0	0.0	1.0	1.0	0.0	0.0	0.0	0.0	1.0	0.0	0.0	0.0	0.0	1.0	0.0	0.0	0.0	0.0
SDCBP	6386	symbol	H. sapiens	6386	H. sapiens	0.0	0.0	1.0	1.0	0.0	0.0	0.0	0.0	0.0	0.0	0.0	0.0	0.0	1.0	0.0	0.0	0.0	0.0	0.0	0.0
PPP1R15A	23645	symbol	H. sapiens	23645	H. sapiens	0.0	0.0	0.0	0.0	0.0	0.0	0.0	0.0	1.0	0.0	0.0	0.0	0.0	0.0	0.0	0.0	0.0	0.0	0.0	0.0
ATP6V0C	527	symbol	H. sapiens	527	H. sapiens	0.0	0.0	0.0	1.0	0.0	0.0	0.0	0.0	0.0	0.0	0.0	1.0	0.0	0.0	0.0	0.0	1.0	0.0	0.0	0.0
ABCB6	10058	symbol	H. sapiens	10058	H. sapiens	0.0	0.0	0.0	0.0	0.0	0.0	0.0	0.0	0.0	0.0	0.0	0.0	0.0	0.0	0.0	0.0	1.0	0.0	0.0	0.0
BTN2A1	11120	symbol	H. sapiens	11120	H. sapiens	0.0	0.0	0.0	0.0	1.0	0.0	0.0	0.0	0.0	0.0	0.0	0.0	0.0	0.0	0.0	0.0	0.0	0.0	0.0	0.0
FTH1	2495	symbol	H. sapiens	2495	H. sapiens	0.0	0.0	0.0	1.0	0.0	0.0	0.0	0.0	0.0	0.0	0.0	0.0	0.0	0.0	0.0	0.0	1.0	0.0	0.0	0.0
RABAC1	10567	symbol	H. sapiens	10567	H. sapiens	0.0	0.0	0.0	0.0	0.0	0.0	0.0	0.0	0.0	0.0	0.0	0.0	0.0	0.0	0.0	0.0	0.0	0.0	0.0	0.0
RAB9A	9367	symbol	H. sapiens	9367	H. sapiens	0.0	0.0	0.0	0.0	0.0	0.0	0.0	0.0	0.0	0.0	0.0	0.0	0.0	0.0	0.0	0.0	0.0	0.0	0.0	0.0
PARP9	83666	symbol	H. sapiens	83666	H. sapiens	1.0	1.0	0.0	0.0	1.0	0.0	0.0	0.0	0.0	0.0	0.0	0.0	0.0	0.0	1.0	1.0	0.0	0.0	0.0	0.0
TAPBP	6892	symbol	H. sapiens	6892	H. sapiens	0.0	0.0	1.0	0.0	0.0	0.0	0.0	0.0	0.0	0.0	0.0	0.0	0.0	0.0	0.0	0.0	0.0	0.0	0.0	0.0
PARP14	54625	symbol	H. sapiens	54625	H. sapiens	1.0	1.0	0.0	0.0	1.0	0.0	0.0	0.0	0.0	0.0	0.0	0.0	0.0	0.0	1.0	0.0	0.0	0.0	0.0	0.0
MB21D2	151963	symbol	H. sapiens	151963	H. sapiens	0.0	0.0	0.0	0.0	0.0	0.0	0.0	0.0	0.0	0.0	0.0	0.0	0.0	0.0	0.0	0.0	0.0	0.0	0.0	0.0
DRAM1	55332	symbol	H. sapiens	55332	H. sapiens	0.0	0.0	0.0	0.0	0.0	0.0	0.0	0.0	0.0	0.0	0.0	1.0	0.0	0.0	0.0	0.0	0.0	0.0	0.0	0.0
TRIM21	6737	symbol	H. sapiens	6737	H. sapiens	1.0	1.0	0.0	0.0	0.0	1.0	0.0	1.0	0.0	1.0	0.0	1.0	0.0	0.0	0.0	0.0	0.0	1.0	1.0	0.0
PRRT3	285368	symbol	H. sapiens	285368	H. sapiens	0.0	0.0	0.0	0.0	0.0	0.0	0.0	0.0	0.0	0.0	0.0	0.0	0.0	0.0	0.0	0.0	0.0	0.0	0.0	0.0
NFKB2	4791	symbol	H. sapiens	4791	H. sapiens	0.0	0.0	1.0	0.0	1.0	1.0	0.0	1.0	0.0	0.0	1.0	0.0	0.0	0.0	0.0	0.0	0.0	0.0	0.0	0.0
TXNDC15	79770	symbol	H. sapiens	79770	H. sapiens	0.0	0.0	0.0	0.0	0.0	0.0	0.0	0.0	0.0	0.0	0.0	0.0	0.0	0.0	0.0	0.0	0.0	0.0	0.0	0.0
MAN2B1	4125	symbol	H. sapiens	4125	H. sapiens	0.0	0.0	0.0	1.0	0.0	0.0	0.0	0.0	0.0	0.0	0.0	0.0	0.0	0.0	0.0	0.0	0.0	0.0	0.0	0.0
PCDH1	5097	symbol	H. sapiens	5097	H. sapiens	0.0	0.0	0.0	0.0	0.0	0.0	0.0	0.0	0.0	0.0	0.0	0.0	0.0	0.0	0.0	0.0	0.0	0.0	0.0	0.0
TSPYL2	64061	symbol	H. sapiens	64061	H. sapiens	0.0	0.0	0.0	0.0	0.0	0.0	0.0	0.0	1.0	0.0	0.0	0.0	0.0	0.0	0.0	0.0	0.0	0.0	0.0	0.0
PLSCR1	5359	symbol	H. sapiens	5359	H. sapiens	1.0	0.0	0.0	1.0	1.0	0.0	1.0	0.0	0.0	0.0	0.0	0.0	0.0	1.0	0.0	0.0	0.0	0.0	0.0	0.0
CRYBG1	202	symbol	H. sapiens	202	H. sapiens	0.0	0.0	0.0	0.0	0.0	0.0	0.0	0.0	0.0	0.0	0.0	0.0	0.0	0.0	0.0	0.0	0.0	0.0	0.0	0.0
AHR	196	symbol	H. sapiens	196	H. sapiens	0.0	0.0	0.0	0.0	0.0	0.0	0.0	0.0	0.0	0.0	1.0	0.0	0.0	0.0	0.0	0.0	0.0	0.0	0.0	0.0
MID2	11043	symbol	H. sapiens	11043	H. sapiens	1.0	0.0	0.0	0.0	0.0	1.0	0.0	0.0	0.0	1.0	0.0	1.0	0.0	0.0	0.0	0.0	0.0	0.0	0.0	0.0
NXPE3	91775	symbol	H. sapiens	91775	H. sapiens	0.0	0.0	0.0	0.0	0.0	0.0	0.0	0.0	0.0	0.0	0.0	0.0	0.0	0.0	0.0	0.0	0.0	0.0	0.0	0.0
ZNFX1	57169	symbol	H. sapiens	57169	H. sapiens	0.0	0.0	0.0	0.0	0.0	0.0	0.0	0.0	0.0	0.0	0.0	0.0	0.0	0.0	0.0	0.0	0.0	0.0	0.0	0.0
TOM1	10043	symbol	H. sapiens	10043	H. sapiens	0.0	0.0	0.0	1.0	0.0	0.0	0.0	0.0	0.0	0.0	0.0	0.0	0.0	0.0	0.0	0.0	0.0	0.0	0.0	0.0
ERAP1	51752	symbol	H. sapiens	51752	H. sapiens	0.0	0.0	1.0	0.0	1.0	0.0	0.0	0.0	0.0	0.0	1.0	0.0	0.0	0.0	0.0	0.0	0.0	0.0	0.0	0.0
NEU1	4758	symbol	H. sapiens	4758	H. sapiens	0.0	0.0	0.0	1.0	0.0	0.0	0.0	0.0	0.0	0.0	0.0	0.0	0.0	0.0	0.0	0.0	0.0	0.0	0.0	0.0
SREBF1	6720	symbol	H. sapiens	6720	H. sapiens	0.0	0.0	0.0	0.0	1.0	0.0	0.0	0.0	0.0	0.0	0.0	1.0	0.0	0.0	0.0	0.0	0.0	0.0	0.0	0.0
IFI27	3429	symbol	H. sapiens	3429	H. sapiens	1.0	0.0	0.0	0.0	0.0	0.0	0.0	0.0	0.0	0.0	0.0	0.0	0.0	0.0	0.0	0.0	0.0	0.0	0.0	0.0
HIST2H3A	333932	gene_synonym	H. sapiens	333932	H. sapiens	1.0	0.0	0.0	0.0	0.0	0.0	0.0	0.0	0.0	0.0	0.0	0.0	1.0	0.0	0.0	0.0	0.0	0.0	0.0	0.0
SAMHD1	25939	symbol	H. sapiens	25939	H. sapiens	1.0	0.0	0.0	0.0	1.0	0.0	0.0	0.0	0.0	0.0	0.0	0.0	0.0	0.0	0.0	1.0	0.0	0.0	0.0	0.0
XAF1	54739	symbol	H. sapiens	54739	H. sapiens	1.0	0.0	0.0	0.0	0.0	0.0	1.0	0.0	0.0	0.0	0.0	0.0	0.0	0.0	0.0	0.0	0.0	0.0	0.0	0.0
RAB39B	116442	symbol	H. sapiens	116442	H. sapiens	0.0	0.0	0.0	0.0	0.0	0.0	0.0	0.0	0.0	0.0	0.0	1.0	0.0	0.0	0.0	0.0	0.0	0.0	0.0	0.0
SUSD1	64420	symbol	H. sapiens	64420	H. sapiens	0.0	0.0	0.0	0.0	0.0	0.0	0.0	0.0	0.0	0.0	0.0	0.0	0.0	0.0	0.0	0.0	0.0	0.0	0.0	0.0
ICAM1	3383	symbol	H. sapiens	3383	H. sapiens	1.0	1.0	1.0	1.0	1.0	1.0	0.0	0.0	0.0	1.0	1.0	0.0	0.0	0.0	0.0	0.0	0.0	0.0	0.0	0.0
VPS18	57617	symbol	H. sapiens	57617	H. sapiens	1.0	0.0	1.0	1.0	0.0	0.0	0.0	0.0	0.0	1.0	0.0	1.0	0.0	1.0	0.0	0.0	0.0	0.0	0.0	0.0
ISG15	9636	symbol	H. sapiens	9636	H. sapiens	1.0	0.0	0.0	0.0	0.0	0.0	0.0	1.0	0.0	0.0	1.0	0.0	1.0	0.0	0.0	1.0	0.0	0.0	1.0	0.0
P3H4	10609	symbol	H. sapiens	10609	H. sapiens	0.0	0.0	0.0	0.0	0.0	0.0	0.0	0.0	0.0	0.0	0.0	0.0	0.0	0.0	0.0	0.0	0.0	0.0	0.0	0.0
IFI6	2537	symbol	H. sapiens	2537	H. sapiens	1.0	0.0	0.0	0.0	0.0	0.0	0.0	0.0	1.0	0.0	0.0	0.0	0.0	0.0	0.0	0.0	0.0	1.0	0.0	0.0
PARP10	84875	symbol	H. sapiens	84875	H. sapiens	1.0	0.0	0.0	0.0	0.0	1.0	0.0	0.0	0.0	0.0	0.0	0.0	0.0	0.0	1.0	1.0	0.0	0.0	1.0	0.0
TACC2	10579	symbol	H. sapiens	10579	H. sapiens	0.0	0.0	0.0	0.0	0.0	0.0	0.0	0.0	0.0	0.0	0.0	0.0	0.0	0.0	0.0	0.0	0.0	0.0	0.0	0.0
B2M	567	symbol	H. sapiens	567	H. sapiens	1.0	1.0	1.0	1.0	0.0	0.0	0.0	1.0	0.0	0.0	1.0	0.0	1.0	0.0	0.0	1.0	1.0	0.0	0.0	0.0
LGALS3BP	3959	symbol	H. sapiens	3959	H. sapiens	0.0	0.0	0.0	1.0	0.0	0.0	0.0	0.0	0.0	0.0	0.0	0.0	0.0	0.0	0.0	0.0	0.0	0.0	0.0	0.0
APOL2	23780	symbol	H. sapiens	23780	H. sapiens	0.0	0.0	0.0	0.0	0.0	0.0	0.0	0.0	0.0	0.0	0.0	0.0	0.0	0.0	0.0	0.0	0.0	0.0	0.0	0.0
IFIT1	3434	symbol	H. sapiens	3434	H. sapiens	1.0	0.0	0.0	0.0	0.0	0.0	0.0	0.0	0.0	1.0	0.0	0.0	0.0	0.0	0.0	1.0	0.0	1.0	0.0	0.0
SP110	3431	symbol	H. sapiens	3431	H. sapiens	0.0	0.0	0.0	0.0	0.0	0.0	0.0	0.0	0.0	0.0	0.0	0.0	0.0	0.0	0.0	0.0	0.0	0.0	0.0	0.0
HELZ2	85441	symbol	H. sapiens	85441	H. sapiens	0.0	0.0	0.0	0.0	0.0	0.0	0.0	0.0	0.0	0.0	0.0	0.0	0.0	0.0	0.0	0.0	0.0	0.0	0.0	0.0
NECTIN4	81607	symbol	H. sapiens	81607	H. sapiens	1.0	0.0	0.0	0.0	0.0	0.0	0.0	0.0	0.0	1.0	0.0	0.0	0.0	0.0	0.0	0.0	0.0	0.0	0.0	0.0
DDX60L	91351	symbol	H. sapiens	91351	H. sapiens	0.0	0.0	0.0	0.0	0.0	0.0	0.0	0.0	0.0	0.0	0.0	0.0	0.0	0.0	0.0	0.0	0.0	0.0	0.0	0.0
POF1B	79983	symbol	H. sapiens	79983	H. sapiens	0.0	0.0	0.0	0.0	0.0	0.0	0.0	0.0	0.0	0.0	0.0	0.0	0.0	0.0	0.0	0.0	0.0	0.0	0.0	0.0
MX1	4599	symbol	H. sapiens	4599	H. sapiens	1.0	0.0	1.0	0.0	0.0	0.0	0.0	0.0	0.0	0.0	0.0	0.0	0.0	0.0	0.0	0.0	0.0	0.0	0.0	0.0
SLC2A6	11182	symbol	H. sapiens	11182	H. sapiens	0.0	0.0	0.0	0.0	0.0	0.0	0.0	0.0	0.0	0.0	0.0	0.0	0.0	0.0	1.0	0.0	0.0	0.0	0.0	0.0
NEDD4L	23327	symbol	H. sapiens	23327	H. sapiens	1.0	0.0	0.0	0.0	0.0	0.0	0.0	0.0	0.0	0.0	0.0	1.0	0.0	0.0	0.0	0.0	1.0	0.0	0.0	0.0
RBM24	221662	symbol	H. sapiens	221662	H. sapiens	0.0	0.0	0.0	0.0	0.0	0.0	0.0	0.0	0.0	0.0	0.0	1.0	0.0	0.0	0.0	0.0	0.0	0.0	0.0	0.0
REEP5	7905	symbol	H. sapiens	7905	H. sapiens	0.0	0.0	0.0	0.0	0.0	0.0	0.0	0.0	0.0	0.0	0.0	0.0	0.0	0.0	0.0	0.0	0.0	0.0	0.0	0.0
GBP1	2633	symbol	H. sapiens	2633	H. sapiens	1.0	1.0	0.0	0.0	1.0	0.0	0.0	1.0	0.0	0.0	1.0	1.0	0.0	0.0	0.0	0.0	0.0	0.0	0.0	0.0
SQSTM1	8878	symbol	H. sapiens	8878	H. sapiens	1.0	0.0	1.0	0.0	1.0	1.0	0.0	0.0	0.0	0.0	1.0	1.0	0.0	1.0	0.0	0.0	0.0	0.0	0.0	0.0
KIAA1683	80726	gene_synonym	H. sapiens	80726	H. sapiens	0.0	0.0	0.0	0.0	0.0	0.0	0.0	0.0	0.0	0.0	0.0	0.0	0.0	0.0	0.0	0.0	0.0	0.0	0.0	0.0
IRF1	3659	symbol	H. sapiens	3659	H. sapiens	1.0	1.0	1.0	0.0	1.0	0.0	1.0	1.0	1.0	0.0	0.0	0.0	1.0	0.0	0.0	0.0	0.0	0.0	0.0	0.0
OPTN	10133	symbol	H. sapiens	10133	H. sapiens	1.0	0.0	0.0	0.0	1.0	1.0	0.0	0.0	1.0	0.0	1.0	1.0	0.0	1.0	0.0	1.0	0.0	1.0	0.0	0.0
DDIT3	1649	symbol	H. sapiens	1649	H. sapiens	0.0	0.0	0.0	0.0	0.0	1.0	0.0	1.0	1.0	0.0	1.0	1.0	0.0	0.0	0.0	0.0	1.0	0.0	0.0	0.0
RELB	5971	symbol	H. sapiens	5971	H. sapiens	0.0	0.0	1.0	1.0	1.0	1.0	0.0	1.0	0.0	0.0	0.0	0.0	1.0	0.0	0.0	0.0	0.0	0.0	1.0	0.0
HIST1H4H	8365	gene_synonym	H. sapiens	8365	H. sapiens	0.0	0.0	0.0	0.0	0.0	0.0	0.0	0.0	0.0	0.0	0.0	0.0	1.0	0.0	0.0	1.0	0.0	0.0	0.0	0.0
HIST2H2AA4	723790	gene_synonym	H. sapiens	723790	H. sapiens	0.0	0.0	0.0	0.0	0.0	0.0	0.0	0.0	0.0	0.0	0.0	0.0	0.0	0.0	0.0	0.0	0.0	0.0	0.0	0.0
UBE2L6	9246	symbol	H. sapiens	9246	H. sapiens	0.0	0.0	0.0	0.0	0.0	0.0	0.0	1.0	0.0	0.0	0.0	0.0	0.0	0.0	0.0	1.0	0.0	0.0	1.0	0.0
TAP1	6890	symbol	H. sapiens	6890	H. sapiens	0.0	0.0	1.0	0.0	0.0	0.0	0.0	0.0	0.0	0.0	0.0	0.0	0.0	0.0	0.0	0.0	0.0	0.0	0.0	0.0
PPP2R5B	5526	symbol	H. sapiens	5526	H. sapiens	0.0	1.0	0.0	0.0	0.0	1.0	0.0	0.0	1.0	0.0	0.0	0.0	0.0	0.0	0.0	0.0	0.0	0.0	0.0	0.0
OAS2	4939	symbol	H. sapiens	4939	H. sapiens	1.0	1.0	0.0	0.0	0.0	0.0	0.0	0.0	0.0	0.0	1.0	0.0	0.0	0.0	0.0	0.0	0.0	0.0	0.0	0.0
KIF5C	3800	symbol	H. sapiens	3800	H. sapiens	0.0	0.0	0.0	0.0	0.0	0.0	0.0	0.0	0.0	0.0	0.0	0.0	0.0	0.0	0.0	0.0	0.0	0.0	0.0	0.0
PLPP1	8611	symbol	H. sapiens	8611	H. sapiens	0.0	0.0	0.0	0.0	0.0	0.0	0.0	0.0	0.0	0.0	0.0	0.0	0.0	0.0	0.0	0.0	0.0	0.0	0.0	0.0
RSAD2	91543	symbol	H. sapiens	91543	H. sapiens	1.0	0.0	1.0	0.0	1.0	0.0	0.0	1.0	0.0	0.0	0.0	0.0	0.0	0.0	0.0	1.0	0.0	0.0	0.0	0.0
IFIT3	3437	symbol	H. sapiens	3437	H. sapiens	1.0	0.0	0.0	0.0	0.0	0.0	0.0	0.0	0.0	0.0	0.0	0.0	0.0	0.0	0.0	0.0	0.0	0.0	0.0	1.0
LCN2	3934	symbol	H. sapiens	3934	H. sapiens	1.0	0.0	0.0	1.0	1.0	0.0	0.0	0.0	0.0	0.0	1.0	0.0	0.0	0.0	0.0	0.0	1.0	0.0	0.0	0.0
TRANK1	9881	symbol	H. sapiens	9881	H. sapiens	0.0	0.0	0.0	0.0	0.0	0.0	0.0	0.0	0.0	0.0	0.0	0.0	0.0	0.0	0.0	0.0	0.0	0.0	0.0	0.0
APOL1	8542	symbol	H. sapiens	8542	H. sapiens	0.0	0.0	0.0	0.0	0.0	0.0	0.0	0.0	0.0	0.0	0.0	0.0	0.0	0.0	0.0	0.0	0.0	0.0	0.0	0.0
ISG20	3669	symbol	H. sapiens	3669	H. sapiens	1.0	0.0	0.0	0.0	0.0	0.0	0.0	0.0	0.0	0.0	0.0	0.0	0.0	0.0	0.0	0.0	0.0	0.0	0.0	0.0
PLA2G4C	8605	symbol	H. sapiens	8605	H. sapiens	0.0	0.0	0.0	0.0	0.0	0.0	0.0	0.0	0.0	0.0	0.0	0.0	0.0	0.0	0.0	0.0	0.0	0.0	0.0	0.0
LGALS9	3965	symbol	H. sapiens	3965	H. sapiens	1.0	1.0	0.0	1.0	1.0	1.0	0.0	1.0	0.0	1.0	1.0	0.0	1.0	0.0	0.0	1.0	0.0	1.0	0.0	0.0
CMPK2	129607	symbol	H. sapiens	129607	H. sapiens	0.0	0.0	0.0	0.0	0.0	0.0	0.0	0.0	0.0	0.0	1.0	0.0	0.0	0.0	0.0	0.0	0.0	0.0	0.0	0.0
NGEF	25791	symbol	H. sapiens	25791	H. sapiens	0.0	0.0	0.0	0.0	0.0	0.0	0.0	0.0	0.0	0.0	0.0	0.0	0.0	0.0	0.0	0.0	0.0	0.0	0.0	0.0
MVP	9961	symbol	H. sapiens	9961	H. sapiens	0.0	1.0	0.0	1.0	0.0	0.0	0.0	0.0	0.0	0.0	0.0	0.0	0.0	0.0	0.0	0.0	0.0	0.0	0.0	0.0
TMEM86A	144110	symbol	H. sapiens	144110	H. sapiens	0.0	0.0	0.0	0.0	0.0	0.0	0.0	0.0	0.0	0.0	0.0	0.0	0.0	0.0	0.0	0.0	0.0	0.0	0.0	0.0
APOL6	80830	symbol	H. sapiens	80830	H. sapiens	0.0	0.0	0.0	0.0	0.0	0.0	0.0	0.0	0.0	0.0	0.0	0.0	0.0	0.0	0.0	0.0	0.0	0.0	0.0	0.0
FILIP1L	11259	symbol	H. sapiens	11259	H. sapiens	0.0	0.0	0.0	0.0	0.0	0.0	0.0	0.0	0.0	0.0	0.0	0.0	0.0	0.0	0.0	0.0	0.0	0.0	0.0	0.0
SGMS1-AS1	104355295	symbol	H. sapiens	104355295	H. sapiens	0.0	0.0	0.0	0.0	0.0	0.0	0.0	0.0	0.0	0.0	0.0	0.0	0.0	0.0	0.0	0.0	0.0	0.0	0.0	0.0
AP003419.2						nan	nan	nan	nan	nan	nan	nan	nan	nan	nan	nan	nan	nan	nan	nan	nan	nan	nan	nan	nan
SDCBP2	27111	symbol	H. sapiens	27111	H. sapiens	0.0	0.0	0.0	0.0	0.0	0.0	0.0	0.0	0.0	0.0	0.0	0.0	0.0	0.0	0.0	0.0	0.0	0.0	0.0	0.0

## Sheet: Enrichment_up_both
GroupID	Category	Term	Description	LogP	Log(q-value)	InTerm_InList	Genes	Symbols
1_Summary	GO Biological Processes	GO:0060337	type I interferon signaling pathway	-19.0218	-15.1223	16/95	103,684,2537,3429,3434,3437,3659,3669,4599,4615,4939,6772,9636,25939,54739,91543,2633,5359,55601,83666,151636,3934,3965,950,3383,6737,10318,11043,23327,51510,57617,81607,84875,3482,10133,567,4792,8878,54625,333932	ADAR,BST2,IFI6,IFI27,IFIT1,IFIT3,IRF1,ISG20,MX1,MYD88,OAS2,STAT1,ISG15,SAMHD1,XAF1,RSAD2,GBP1,PLSCR1,DDX60,PARP9,DTX3L,LCN2,LGALS9,SCARB2,ICAM1,TRIM21,TNIP1,MID2,NEDD4L,CHMP5,VPS18,NECTIN4,PARP10,IGF2R,OPTN,B2M,NFKBIA,SQSTM1,PARP14,H3C15
1_Member	GO Biological Processes	GO:0060337	type I interferon signaling pathway	-19.0218	-15.1223	16/95	103,684,2537,3429,3434,3437,3659,3669,4599,4615,4939,6772,9636,25939,54739,91543	ADAR,BST2,IFI6,IFI27,IFIT1,IFIT3,IRF1,ISG20,MX1,MYD88,OAS2,STAT1,ISG15,SAMHD1,XAF1,RSAD2
1_Member	GO Biological Processes	GO:0071357	cellular response to type I interferon	-19.0218	-15.1223	16/95	103,684,2537,3429,3434,3437,3659,3669,4599,4615,4939,6772,9636,25939,54739,91543	ADAR,BST2,IFI6,IFI27,IFIT1,IFIT3,IRF1,ISG20,MX1,MYD88,OAS2,STAT1,ISG15,SAMHD1,XAF1,RSAD2
1_Member	GO Biological Processes	GO:0034340	response to type I interferon	-18.7183	-14.9948	16/99	103,684,2537,3429,3434,3437,3659,3669,4599,4615,4939,6772,9636,25939,54739,91543	ADAR,BST2,IFI6,IFI27,IFIT1,IFIT3,IRF1,ISG20,MX1,MYD88,OAS2,STAT1,ISG15,SAMHD1,XAF1,RSAD2
1_Member	GO Biological Processes	GO:0051607	defense response to virus	-16.2159	-12.6174	19/239	103,684,2537,2633,3429,3434,3437,3659,3669,4599,4939,5359,6772,9636,25939,55601,83666,91543,151636	ADAR,BST2,IFI6,GBP1,IFI27,IFIT1,IFIT3,IRF1,ISG20,MX1,OAS2,PLSCR1,STAT1,ISG15,SAMHD1,DDX60,PARP9,RSAD2,DTX3L
1_Member	GO Biological Processes	GO:0009615	response to virus	-16.0123	-12.5107	21/327	103,684,2537,2633,3429,3434,3437,3659,3669,3934,3965,4599,4939,5359,6772,9636,25939,55601,83666,91543,151636	ADAR,BST2,IFI6,GBP1,IFI27,IFIT1,IFIT3,IRF1,ISG20,LCN2,LGALS9,MX1,OAS2,PLSCR1,STAT1,ISG15,SAMHD1,DDX60,PARP9,RSAD2,DTX3L
1_Member	GO Biological Processes	GO:0019058	viral life cycle	-14.7988	-11.3764	20/329	103,684,950,3383,3429,3434,3669,3965,4599,5359,6737,9636,10318,11043,23327,51510,57617,81607,84875,91543	ADAR,BST2,SCARB2,ICAM1,IFI27,IFIT1,ISG20,LGALS9,MX1,PLSCR1,TRIM21,ISG15,TNIP1,MID2,NEDD4L,CHMP5,VPS18,NECTIN4,PARP10,RSAD2
1_Member	GO Biological Processes	GO:0050792	regulation of viral process	-13.4755	-10.12	16/208	103,684,3429,3434,3482,3669,3965,4599,5359,6737,6772,9636,10318,11043,84875,91543	ADAR,BST2,IFI27,IFIT1,IGF2R,ISG20,LGALS9,MX1,PLSCR1,TRIM21,STAT1,ISG15,TNIP1,MID2,PARP10,RSAD2
1_Member	GO Biological Processes	GO:0043900	regulation of multi-organism process	-13.0526	-9.83333	20/407	103,684,3429,3434,3482,3669,3965,4599,5359,6737,6772,9636,10133,10318,11043,55601,83666,84875,91543,151636	ADAR,BST2,IFI27,IFIT1,IGF2R,ISG20,LGALS9,MX1,PLSCR1,TRIM21,STAT1,ISG15,OPTN,TNIP1,MID2,DDX60,PARP9,PARP10,RSAD2,DTX3L
1_Member	GO Biological Processes	GO:1903900	regulation of viral life cycle	-13.0404	-9.83333	14/149	103,684,3429,3434,3669,3965,4599,5359,6737,9636,10318,11043,84875,91543	ADAR,BST2,IFI27,IFIT1,ISG20,LGALS9,MX1,PLSCR1,TRIM21,ISG15,TNIP1,MID2,PARP10,RSAD2
1_Member	GO Biological Processes	GO:0043903	regulation of symbiosis, encompassing mutualism through parasitism	-13.0339	-9.83333	16/222	103,684,3429,3434,3482,3669,3965,4599,5359,6737,6772,9636,10318,11043,84875,91543	ADAR,BST2,IFI27,IFIT1,IGF2R,ISG20,LGALS9,MX1,PLSCR1,TRIM21,STAT1,ISG15,TNIP1,MID2,PARP10,RSAD2
1_Member	GO Biological Processes	GO:0019221	cytokine-mediated signaling pathway	-12.7355	-9.5763	26/798	103,567,684,2537,2633,3383,3429,3434,3437,3659,3669,3934,4599,4615,4792,4939,6737,6772,8878,9636,25939,54625,54739,83666,91543,333932	ADAR,B2M,BST2,IFI6,GBP1,ICAM1,IFI27,IFIT1,IFIT3,IRF1,ISG20,LCN2,MX1,MYD88,NFKBIA,OAS2,TRIM21,STAT1,SQSTM1,ISG15,SAMHD1,PARP14,XAF1,PARP9,RSAD2,H3C15
1_Member	GO Biological Processes	GO:0048525	negative regulation of viral process	-12.5797	-9.45834	12/99	684,3434,3669,4599,5359,6737,6772,9636,10318,11043,84875,91543	BST2,IFIT1,ISG20,MX1,PLSCR1,TRIM21,STAT1,ISG15,TNIP1,MID2,PARP10,RSAD2
1_Member	GO Biological Processes	GO:0098542	defense response to other organism	-12.2078	-9.12114	22/571	103,684,2537,2633,3429,3434,3437,3659,3669,3934,4599,4615,4939,5359,6772,9636,10133,25939,55601,83666,91543,151636	ADAR,BST2,IFI6,GBP1,IFI27,IFIT1,IFIT3,IRF1,ISG20,LCN2,MX1,MYD88,OAS2,PLSCR1,STAT1,ISG15,OPTN,SAMHD1,DDX60,PARP9,RSAD2,DTX3L
1_Member	GO Biological Processes	GO:1903901	negative regulation of viral life cycle	-11.8906	-8.83619	11/85	684,3434,3669,4599,5359,6737,9636,10318,11043,84875,91543	BST2,IFIT1,ISG20,MX1,PLSCR1,TRIM21,ISG15,TNIP1,MID2,PARP10,RSAD2
1_Member	GO Biological Processes	GO:0045069	regulation of viral genome replication	-11.3472	-8.3227	11/95	103,684,3429,3434,3669,4599,5359,9636,10318,84875,91543	ADAR,BST2,IFI27,IFIT1,ISG20,MX1,PLSCR1,ISG15,TNIP1,PARP10,RSAD2
1_Member	GO Biological Processes	GO:0045071	negative regulation of viral genome replication	-10.4829	-7.48644	9/59	684,3434,3669,4599,5359,9636,10318,84875,91543	BST2,IFIT1,ISG20,MX1,PLSCR1,ISG15,TNIP1,PARP10,RSAD2
1_Member	GO Biological Processes	GO:0019079	viral genome replication	-10.1466	-7.17649	11/122	103,684,3429,3434,3669,4599,5359,9636,10318,84875,91543	ADAR,BST2,IFI27,IFIT1,ISG20,MX1,PLSCR1,ISG15,TNIP1,PARP10,RSAD2
1_Member	GO Biological Processes	GO:0043901	negative regulation of multi-organism process	-9.74545	-6.80014	12/171	684,3434,3669,4599,5359,6737,6772,9636,10318,11043,84875,91543	BST2,IFIT1,ISG20,MX1,PLSCR1,TRIM21,STAT1,ISG15,TNIP1,MID2,PARP10,RSAD2
2_Summary	GO Biological Processes	GO:0034341	response to interferon-gamma	-8.98656	-6.06473	12/199	567,684,961,2633,3383,3659,3965,4939,6737,6772,54625,83666,5526,9961	B2M,BST2,CD47,GBP1,ICAM1,IRF1,LGALS9,OAS2,TRIM21,STAT1,PARP14,PARP9,PPP2R5B,MVP
2_Member	GO Biological Processes	GO:0034341	response to interferon-gamma	-8.98656	-6.06473	12/199	567,684,961,2633,3383,3659,3965,4939,6737,6772,54625,83666	B2M,BST2,CD47,GBP1,ICAM1,IRF1,LGALS9,OAS2,TRIM21,STAT1,PARP14,PARP9
2_Member	GO Biological Processes	GO:0060333	interferon-gamma-mediated signaling pathway	-8.75171	-5.85216	9/91	567,2633,3383,3659,4939,6737,6772,54625,83666	B2M,GBP1,ICAM1,IRF1,OAS2,TRIM21,STAT1,PARP14,PARP9
2_Member	GO Biological Processes	GO:0071346	cellular response to interferon-gamma	-8.33833	-5.45997	11/180	567,961,2633,3383,3659,3965,4939,6737,6772,54625,83666	B2M,CD47,GBP1,ICAM1,IRF1,LGALS9,OAS2,TRIM21,STAT1,PARP14,PARP9
2_Member	GO Biological Processes	GO:0050730	regulation of peptidyl-tyrosine phosphorylation	-1.87296	-0.0378755	5/256	3383,5526,9961,54625,83666	ICAM1,PPP2R5B,MVP,PARP14,PARP9
2_Member	GO Biological Processes	GO:0018108	peptidyl-tyrosine phosphorylation	-1.30251	0	5/364	3383,5526,9961,54625,83666	ICAM1,PPP2R5B,MVP,PARP14,PARP9
3_Summary	GO Biological Processes	GO:0002483	antigen processing and presentation of endogenous peptide antigen	-7.88678	-5.04793	5/15	567,6890,6891,6892,51752,1512,1778,3383,5971,9632,950,6386,8878,51510,57617,63971,3659,4791,7030,91543,4599	B2M,TAP1,TAP2,TAPBP,ERAP1,CTSH,DYNC1H1,ICAM1,RELB,SEC24C,SCARB2,SDCBP,SQSTM1,CHMP5,VPS18,KIF13A,IRF1,NFKB2,TFE3,RSAD2,MX1
3_Member	GO Biological Processes	GO:0002483	antigen processing and presentation of endogenous peptide antigen	-7.88678	-5.04793	5/15	567,6890,6891,6892,51752	B2M,TAP1,TAP2,TAPBP,ERAP1
3_Member	GO Biological Processes	GO:0019885	antigen processing and presentation of endogenous peptide antigen via MHC class I	-7.88678	-5.04793	5/15	567,6890,6891,6892,51752	B2M,TAP1,TAP2,TAPBP,ERAP1
3_Member	GO Biological Processes	GO:0019883	antigen processing and presentation of endogenous antigen	-6.95715	-4.30064	5/22	567,6890,6891,6892,51752	B2M,TAP1,TAP2,TAPBP,ERAP1
3_Member	GO Biological Processes	GO:0019882	antigen processing and presentation	-6.29585	-3.71852	10/227	567,1512,1778,3383,5971,6890,6891,6892,9632,51752	B2M,CTSH,DYNC1H1,ICAM1,RELB,TAP1,TAP2,TAPBP,SEC24C,ERAP1
3_Member	GO Biological Processes	GO:1990668	vesicle fusion with endoplasmic reticulum-Golgi intermediate compartment (ERGIC) membrane	-5.50138	-2.991	3/6	6890,6891,6892	TAP1,TAP2,TAPBP
3_Member	GO Biological Processes	GO:0016050	vesicle organization	-4.90638	-2.47666	10/325	950,6386,6890,6891,6892,8878,9632,51510,57617,63971	SCARB2,SDCBP,TAP1,TAP2,TAPBP,SQSTM1,SEC24C,CHMP5,VPS18,KIF13A
3_Member	GO Biological Processes	GO:0002474	antigen processing and presentation of peptide antigen via MHC class I	-4.80621	-2.39096	6/97	567,6890,6891,6892,9632,51752	B2M,TAP1,TAP2,TAPBP,SEC24C,ERAP1
3_Member	GO Biological Processes	GO:0048002	antigen processing and presentation of peptide antigen	-4.06611	-1.75202	7/190	567,1778,6890,6891,6892,9632,51752	B2M,DYNC1H1,TAP1,TAP2,TAPBP,SEC24C,ERAP1
3_Member	GO Biological Processes	GO:0002478	antigen processing and presentation of exogenous peptide antigen	-3.38835	-1.19637	6/175	567,1778,6890,6891,6892,9632	B2M,DYNC1H1,TAP1,TAP2,TAPBP,SEC24C
3_Member	GO Biological Processes	GO:0019884	antigen processing and presentation of exogenous antigen	-3.29816	-1.11877	6/182	567,1778,6890,6891,6892,9632	B2M,DYNC1H1,TAP1,TAP2,TAPBP,SEC24C
3_Member	GO Biological Processes	GO:0002479	antigen processing and presentation of exogenous peptide antigen via MHC class I, TAP-dependent	-3.11515	-0.963786	4/75	567,6890,6891,6892	B2M,TAP1,TAP2,TAPBP
3_Member	GO Biological Processes	GO:0042590	antigen processing and presentation of exogenous peptide antigen via MHC class I	-3.03037	-0.901674	4/79	567,6890,6891,6892	B2M,TAP1,TAP2,TAPBP
3_Member	GO Biological Processes	GO:0002250	adaptive immune response	-2.89341	-0.790627	11/679	567,1512,3383,3659,4791,5971,6890,6891,7030,51752,91543	B2M,CTSH,ICAM1,IRF1,NFKB2,RELB,TAP1,TAP2,TFE3,ERAP1,RSAD2
3_Member	GO Biological Processes	GO:0061025	membrane fusion	-2.79748	-0.710851	5/154	4599,6890,6891,6892,57617	MX1,TAP1,TAP2,TAPBP,VPS18
3_Member	GO Biological Processes	GO:0006906	vesicle fusion	-2.75029	-0.670288	4/94	6890,6891,6892,57617	TAP1,TAP2,TAPBP,VPS18
3_Member	GO Biological Processes	GO:0090174	organelle membrane fusion	-2.65201	-0.597565	4/100	6890,6891,6892,57617	TAP1,TAP2,TAPBP,VPS18
3_Member	GO Biological Processes	GO:0048284	organelle fusion	-2.29222	-0.334678	4/126	6890,6891,6892,57617	TAP1,TAP2,TAPBP,VPS18
4_Summary	GO Biological Processes	GO:0002274	myeloid leukocyte activation	-7.73567	-4.9153	18/653	527,567,684,961,1476,1512,1778,2495,3482,3934,3965,4125,4758,5359,5971,6386,9961,10043,3383,3959,57617	ATP6V0C,B2M,BST2,CD47,CSTB,CTSH,DYNC1H1,FTH1,IGF2R,LCN2,LGALS9,MAN2B1,NEU1,PLSCR1,RELB,SDCBP,MVP,TOM1,ICAM1,LGALS3BP,VPS18
4_Member	GO Biological Processes	GO:0002274	myeloid leukocyte activation	-7.73567	-4.9153	18/653	527,567,684,961,1476,1512,1778,2495,3482,3934,3965,4125,4758,5359,5971,6386,9961,10043	ATP6V0C,B2M,BST2,CD47,CSTB,CTSH,DYNC1H1,FTH1,IGF2R,LCN2,LGALS9,MAN2B1,NEU1,PLSCR1,RELB,SDCBP,MVP,TOM1
4_Member	GO Biological Processes	GO:0043299	leukocyte degranulation	-7.38972	-4.60411	16/536	527,567,684,961,1476,1512,1778,2495,3482,3934,3965,4125,4758,6386,9961,10043	ATP6V0C,B2M,BST2,CD47,CSTB,CTSH,DYNC1H1,FTH1,IGF2R,LCN2,LGALS9,MAN2B1,NEU1,SDCBP,MVP,TOM1
4_Member	GO Biological Processes	GO:0002275	myeloid cell activation involved in immune response	-7.27936	-4.51015	16/546	527,567,684,961,1476,1512,1778,2495,3482,3934,3965,4125,4758,6386,9961,10043	ATP6V0C,B2M,BST2,CD47,CSTB,CTSH,DYNC1H1,FTH1,IGF2R,LCN2,LGALS9,MAN2B1,NEU1,SDCBP,MVP,TOM1
4_Member	GO Biological Processes	GO:0002366	leukocyte activation involved in immune response	-7.19516	-4.45463	18/709	527,567,684,961,1476,1512,1778,2495,3383,3482,3934,3965,4125,4758,5971,6386,9961,10043	ATP6V0C,B2M,BST2,CD47,CSTB,CTSH,DYNC1H1,FTH1,ICAM1,IGF2R,LCN2,LGALS9,MAN2B1,NEU1,RELB,SDCBP,MVP,TOM1
4_Member	GO Biological Processes	GO:0002444	myeloid leukocyte mediated immunity	-7.19281	-4.45463	16/554	527,567,684,961,1476,1512,1778,2495,3482,3934,3965,4125,4758,6386,9961,10043	ATP6V0C,B2M,BST2,CD47,CSTB,CTSH,DYNC1H1,FTH1,IGF2R,LCN2,LGALS9,MAN2B1,NEU1,SDCBP,MVP,TOM1
4_Member	GO Biological Processes	GO:0002263	cell activation involved in immune response	-7.15857	-4.43512	18/713	527,567,684,961,1476,1512,1778,2495,3383,3482,3934,3965,4125,4758,5971,6386,9961,10043	ATP6V0C,B2M,BST2,CD47,CSTB,CTSH,DYNC1H1,FTH1,ICAM1,IGF2R,LCN2,LGALS9,MAN2B1,NEU1,RELB,SDCBP,MVP,TOM1
4_Member	GO Biological Processes	GO:0043312	neutrophil degranulation	-7.14102	-4.43181	15/486	527,567,684,961,1476,1512,1778,2495,3482,3934,4125,4758,6386,9961,10043	ATP6V0C,B2M,BST2,CD47,CSTB,CTSH,DYNC1H1,FTH1,IGF2R,LCN2,MAN2B1,NEU1,SDCBP,MVP,TOM1
4_Member	GO Biological Processes	GO:0002283	neutrophil activation involved in immune response	-7.10633	-4.41091	15/489	527,567,684,961,1476,1512,1778,2495,3482,3934,4125,4758,6386,9961,10043	ATP6V0C,B2M,BST2,CD47,CSTB,CTSH,DYNC1H1,FTH1,IGF2R,LCN2,MAN2B1,NEU1,SDCBP,MVP,TOM1
4_Member	GO Biological Processes	GO:0042119	neutrophil activation	-6.9925	-4.31217	15/499	527,567,684,961,1476,1512,1778,2495,3482,3934,4125,4758,6386,9961,10043	ATP6V0C,B2M,BST2,CD47,CSTB,CTSH,DYNC1H1,FTH1,IGF2R,LCN2,MAN2B1,NEU1,SDCBP,MVP,TOM1
4_Member	GO Biological Processes	GO:0002446	neutrophil mediated immunity	-6.98127	-4.31217	15/500	527,567,684,961,1476,1512,1778,2495,3482,3934,4125,4758,6386,9961,10043	ATP6V0C,B2M,BST2,CD47,CSTB,CTSH,DYNC1H1,FTH1,IGF2R,LCN2,MAN2B1,NEU1,SDCBP,MVP,TOM1
4_Member	GO Biological Processes	GO:0036230	granulocyte activation	-6.93661	-4.29233	15/504	527,567,684,961,1476,1512,1778,2495,3482,3934,4125,4758,6386,9961,10043	ATP6V0C,B2M,BST2,CD47,CSTB,CTSH,DYNC1H1,FTH1,IGF2R,LCN2,MAN2B1,NEU1,SDCBP,MVP,TOM1
4_Member	GO Biological Processes	GO:0045055	regulated exocytosis	-6.4604	-3.83961	18/795	527,567,684,961,1476,1512,1778,2495,3482,3934,3959,3965,4125,4758,6386,9961,10043,57617	ATP6V0C,B2M,BST2,CD47,CSTB,CTSH,DYNC1H1,FTH1,IGF2R,LCN2,LGALS3BP,LGALS9,MAN2B1,NEU1,SDCBP,MVP,TOM1,VPS18
5_Summary	GO Biological Processes	GO:0045088	regulation of innate immune response	-7.52765	-4.72502	15/454	103,3659,3965,4615,4792,5359,5971,6772,10318,25939,51752,54625,55601,83666,91543,961,1512,2633,5530,11120,10133,4791,5493,8878,3383,3934,6720	ADAR,IRF1,LGALS9,MYD88,NFKBIA,PLSCR1,RELB,STAT1,TNIP1,SAMHD1,ERAP1,PARP14,DDX60,PARP9,RSAD2,CD47,CTSH,GBP1,PPP3CA,BTN2A1,OPTN,NFKB2,PPL,SQSTM1,ICAM1,LCN2,SREBF1
5_Member	GO Biological Processes	GO:0045088	regulation of innate immune response	-7.52765	-4.72502	15/454	103,3659,3965,4615,4792,5359,5971,6772,10318,25939,51752,54625,55601,83666,91543	ADAR,IRF1,LGALS9,MYD88,NFKBIA,PLSCR1,RELB,STAT1,TNIP1,SAMHD1,ERAP1,PARP14,DDX60,PARP9,RSAD2
5_Member	GO Biological Processes	GO:0002764	immune response-regulating signaling pathway	-4.66975	-2.28872	14/678	961,1512,2633,3659,3965,4615,4792,5359,5530,5971,10318,11120,55601,91543	CD47,CTSH,GBP1,IRF1,LGALS9,MYD88,NFKBIA,PLSCR1,PPP3CA,RELB,TNIP1,BTN2A1,DDX60,RSAD2
5_Member	GO Biological Processes	GO:0031349	positive regulation of defense response	-4.49971	-2.13798	12/524	961,3659,3965,4615,4792,5359,5971,10133,10318,55601,83666,91543	CD47,IRF1,LGALS9,MYD88,NFKBIA,PLSCR1,RELB,OPTN,TNIP1,DDX60,PARP9,RSAD2
5_Member	GO Biological Processes	GO:0045089	positive regulation of innate immune response	-4.29021	-1.94697	10/384	3659,3965,4615,4792,5359,5971,10318,55601,83666,91543	IRF1,LGALS9,MYD88,NFKBIA,PLSCR1,RELB,TNIP1,DDX60,PARP9,RSAD2
5_Member	GO Biological Processes	GO:0002221	pattern recognition receptor signaling pathway	-3.92728	-1.62433	7/200	3659,3965,4615,4792,10318,55601,91543	IRF1,LGALS9,MYD88,NFKBIA,TNIP1,DDX60,RSAD2
5_Member	GO Biological Processes	GO:0002224	toll-like receptor signaling pathway	-3.764	-1.47724	6/149	3659,3965,4615,4792,10318,91543	IRF1,LGALS9,MYD88,NFKBIA,TNIP1,RSAD2
5_Member	GO Biological Processes	GO:0002757	immune response-activating signal transduction	-3.65502	-1.37872	12/644	961,2633,3659,3965,4615,4792,5359,5971,10318,11120,55601,91543	CD47,GBP1,IRF1,LGALS9,MYD88,NFKBIA,PLSCR1,RELB,TNIP1,BTN2A1,DDX60,RSAD2
5_Member	GO Biological Processes	GO:0002758	innate immune response-activating signal transduction	-3.59062	-1.33452	8/301	3659,3965,4615,4792,5971,10318,55601,91543	IRF1,LGALS9,MYD88,NFKBIA,RELB,TNIP1,DDX60,RSAD2
5_Member	GO Biological Processes	GO:0002218	activation of innate immune response	-3.39499	-1.19873	8/322	3659,3965,4615,4792,5971,10318,55601,91543	IRF1,LGALS9,MYD88,NFKBIA,RELB,TNIP1,DDX60,RSAD2
5_Member	GO Biological Processes	GO:0002253	activation of immune response	-3.18422	-1.02896	12/727	961,2633,3659,3965,4615,4792,5359,5971,10318,11120,55601,91543	CD47,GBP1,IRF1,LGALS9,MYD88,NFKBIA,PLSCR1,RELB,TNIP1,BTN2A1,DDX60,RSAD2
5_Member	GO Biological Processes	GO:0032481	positive regulation of type I interferon production	-3.07215	-0.932268	4/77	3659,4615,4791,6772	IRF1,MYD88,NFKB2,STAT1
5_Member	GO Biological Processes	GO:0002755	MyD88-dependent toll-like receptor signaling pathway	-3.00079	-0.879392	3/36	3659,4615,10318	IRF1,MYD88,TNIP1
5_Member	GO Biological Processes	GO:0032103	positive regulation of response to external stimulus	-2.69211	-0.626632	7/323	961,3965,4615,4792,10133,10318,55601	CD47,LGALS9,MYD88,NFKBIA,OPTN,TNIP1,DDX60
5_Member	GO Biological Processes	GO:0009612	response to mechanical stimulus	-2.22122	-0.27832	5/210	3659,4615,4792,5493,6772	IRF1,MYD88,NFKBIA,PPL,STAT1
5_Member	GO Biological Processes	GO:0050729	positive regulation of inflammatory response	-1.99999	-0.126383	4/153	961,4615,4792,10318	CD47,MYD88,NFKBIA,TNIP1
5_Member	GO Biological Processes	GO:0070498	interleukin-1-mediated signaling pathway	-1.75558	0	3/100	4615,4792,8878	MYD88,NFKBIA,SQSTM1
5_Member	GO Biological Processes	GO:0071496	cellular response to external stimulus	-1.41213	0	5/339	3383,3659,3934,4615,6720	ICAM1,IRF1,LCN2,MYD88,SREBF1
6_Summary	GO Biological Processes	GO:0007249	I-kappaB kinase/NF-kappaB signaling	-6.55177	-3.91939	11/269	389,684,3965,4615,4792,5971,6772,8878,10133,10318,11043,1649,3383,4791,5526,5530,6737,84159,84875	RHOC,BST2,LGALS9,MYD88,NFKBIA,RELB,STAT1,SQSTM1,OPTN,TNIP1,MID2,DDIT3,ICAM1,NFKB2,PPP2R5B,PPP3CA,TRIM21,ARID5B,PARP10
6_Member	GO Biological Processes	GO:0007249	I-kappaB kinase/NF-kappaB signaling	-6.55177	-3.91939	11/269	389,684,3965,4615,4792,5971,6772,8878,10133,10318,11043	RHOC,BST2,LGALS9,MYD88,NFKBIA,RELB,STAT1,SQSTM1,OPTN,TNIP1,MID2
6_Member	GO Biological Processes	GO:0051091	positive regulation of DNA-binding transcription factor activity	-5.7461	-3.21762	10/261	1649,3383,3965,4615,4791,5526,5530,6737,11043,84159	DDIT3,ICAM1,LGALS9,MYD88,NFKB2,PPP2R5B,PPP3CA,TRIM21,MID2,ARID5B
6_Member	GO Biological Processes	GO:0051090	regulation of DNA-binding transcription factor activity	-5.33347	-2.83187	12/432	1649,3383,3965,4615,4791,4792,5526,5530,6737,11043,84159,84875	DDIT3,ICAM1,LGALS9,MYD88,NFKB2,NFKBIA,PPP2R5B,PPP3CA,TRIM21,MID2,ARID5B,PARP10
6_Member	GO Biological Processes	GO:0043122	regulation of I-kappaB kinase/NF-kappaB signaling	-5.19051	-2.70594	9/237	389,684,3965,4615,6772,8878,10133,10318,11043	RHOC,BST2,LGALS9,MYD88,STAT1,SQSTM1,OPTN,TNIP1,MID2
6_Member	GO Biological Processes	GO:0051092	positive regulation of NF-kappaB transcription factor activity	-2.84788	-0.754515	5/150	3383,3965,4615,4791,11043	ICAM1,LGALS9,MYD88,NFKB2,MID2
6_Member	GO Biological Processes	GO:0032757	positive regulation of interleukin-8 production	-2.61155	-0.576914	3/49	1649,3965,4615	DDIT3,LGALS9,MYD88
6_Member	GO Biological Processes	GO:0043123	positive regulation of I-kappaB kinase/NF-kappaB signaling	-2.47268	-0.478928	5/183	389,684,3965,4615,11043	RHOC,BST2,LGALS9,MYD88,MID2
6_Member	GO Biological Processes	GO:0032677	regulation of interleukin-8 production	-2.10816	-0.192267	3/74	1649,3965,4615	DDIT3,LGALS9,MYD88
6_Member	GO Biological Processes	GO:0032637	interleukin-8 production	-1.98635	-0.124398	3/82	1649,3965,4615	DDIT3,LGALS9,MYD88
7_Summary	GO Biological Processes	GO:0035456	response to interferon-beta	-6.39663	-3.78712	5/28	684,3659,5359,6772,54739	BST2,IRF1,PLSCR1,STAT1,XAF1
7_Member	GO Biological Processes	GO:0035456	response to interferon-beta	-6.39663	-3.78712	5/28	684,3659,5359,6772,54739	BST2,IRF1,PLSCR1,STAT1,XAF1
8_Summary	GO Biological Processes	GO:0001817	regulation of cytokine production	-6.37363	-3.77512	17/720	567,684,961,1001,1649,2633,3659,3965,4615,4791,5971,6737,6772,9246,9636,55601,91543	B2M,BST2,CD47,CDH3,DDIT3,GBP1,IRF1,LGALS9,MYD88,NFKB2,RELB,TRIM21,STAT1,UBE2L6,ISG15,DDX60,RSAD2
8_Member	GO Biological Processes	GO:0001817	regulation of cytokine production	-6.37363	-3.77512	17/720	567,684,961,1001,1649,2633,3659,3965,4615,4791,5971,6737,6772,9246,9636,55601,91543	B2M,BST2,CD47,CDH3,DDIT3,GBP1,IRF1,LGALS9,MYD88,NFKB2,RELB,TRIM21,STAT1,UBE2L6,ISG15,DDX60,RSAD2
8_Member	GO Biological Processes	GO:0032479	regulation of type I interferon production	-6.32807	-3.74028	8/126	3659,4615,4791,5971,6737,6772,9246,9636	IRF1,MYD88,NFKB2,RELB,TRIM21,STAT1,UBE2L6,ISG15
8_Member	GO Biological Processes	GO:0032606	type I interferon production	-6.27575	-3.70864	8/128	3659,4615,4791,5971,6737,6772,9246,9636	IRF1,MYD88,NFKB2,RELB,TRIM21,STAT1,UBE2L6,ISG15
8_Member	GO Biological Processes	GO:0001816	cytokine production	-5.80574	-3.26792	17/792	567,684,961,1001,1649,2633,3659,3965,4615,4791,5971,6737,6772,9246,9636,55601,91543	B2M,BST2,CD47,CDH3,DDIT3,GBP1,IRF1,LGALS9,MYD88,NFKB2,RELB,TRIM21,STAT1,UBE2L6,ISG15,DDX60,RSAD2
8_Member	GO Biological Processes	GO:0001819	positive regulation of cytokine production	-2.98216	-0.864366	9/464	567,1649,3659,3965,4615,4791,6772,55601,91543	B2M,DDIT3,IRF1,LGALS9,MYD88,NFKB2,STAT1,DDX60,RSAD2
8_Member	GO Biological Processes	GO:0001818	negative regulation of cytokine production	-2.89083	-0.790627	7/298	684,1001,2633,3965,5971,9246,9636	BST2,CDH3,GBP1,LGALS9,RELB,UBE2L6,ISG15
9_Summary	GO Biological Processes	GO:0006986	response to unfolded protein	-6.25573	-3.69861	9/176	1649,2081,3301,5526,10133,10808,23645,26353,64061,3659,2537	DDIT3,ERN1,DNAJA1,PPP2R5B,OPTN,HSPH1,PPP1R15A,HSPB8,TSPYL2,IRF1,IFI6
9_Member	GO Biological Processes	GO:0006986	response to unfolded protein	-6.25573	-3.69861	9/176	1649,2081,3301,5526,10133,10808,23645,26353,64061	DDIT3,ERN1,DNAJA1,PPP2R5B,OPTN,HSPH1,PPP1R15A,HSPB8,TSPYL2
9_Member	GO Biological Processes	GO:0035966	response to topologically incorrect protein	-5.81088	-3.26792	9/199	1649,2081,3301,5526,10133,10808,23645,26353,64061	DDIT3,ERN1,DNAJA1,PPP2R5B,OPTN,HSPH1,PPP1R15A,HSPB8,TSPYL2
9_Member	GO Biological Processes	GO:0034620	cellular response to unfolded protein	-4.91417	-2.47702	7/140	1649,2081,5526,10133,23645,26353,64061	DDIT3,ERN1,PPP2R5B,OPTN,PPP1R15A,HSPB8,TSPYL2
9_Member	GO Biological Processes	GO:0035967	cellular response to topologically incorrect protein	-4.52169	-2.15363	7/161	1649,2081,5526,10133,23645,26353,64061	DDIT3,ERN1,PPP2R5B,OPTN,PPP1R15A,HSPB8,TSPYL2
9_Member	GO Biological Processes	GO:0030968	endoplasmic reticulum unfolded protein response	-3.26691	-1.09164	5/121	1649,2081,5526,23645,64061	DDIT3,ERN1,PPP2R5B,PPP1R15A,TSPYL2
9_Member	GO Biological Processes	GO:1905898	positive regulation of response to endoplasmic reticulum stress	-2.93181	-0.824652	3/38	1649,2081,23645	DDIT3,ERN1,PPP1R15A
9_Member	GO Biological Processes	GO:0070059	intrinsic apoptotic signaling pathway in response to endoplasmic reticulum stress	-2.32159	-0.359058	3/62	1649,2081,23645	DDIT3,ERN1,PPP1R15A
9_Member	GO Biological Processes	GO:0036498	IRE1-mediated unfolded protein response	-2.28299	-0.327921	3/64	2081,5526,64061	ERN1,PPP2R5B,TSPYL2
9_Member	GO Biological Processes	GO:0007050	cell cycle arrest	-1.99914	-0.126383	5/238	1649,2081,3659,5526,23645	DDIT3,ERN1,IRF1,PPP2R5B,PPP1R15A
9_Member	GO Biological Processes	GO:1905897	regulation of response to endoplasmic reticulum stress	-1.95799	-0.107659	3/84	1649,2081,23645	DDIT3,ERN1,PPP1R15A
9_Member	GO Biological Processes	GO:0034976	response to endoplasmic reticulum stress	-1.69191	0	5/285	1649,2081,5526,23645,64061	DDIT3,ERN1,PPP2R5B,PPP1R15A,TSPYL2
9_Member	GO Biological Processes	GO:0097193	intrinsic apoptotic signaling pathway	-1.66882	0	5/289	1649,2081,2537,3301,23645	DDIT3,ERN1,IFI6,DNAJA1,PPP1R15A
10_Summary	GO Biological Processes	GO:0051701	interaction with host	-5.61825	-3.09891	9/210	950,3383,3434,3965,6737,10318,11043,57617,81607	SCARB2,ICAM1,IFIT1,LGALS9,TRIM21,TNIP1,MID2,VPS18,NECTIN4
10_Member	GO Biological Processes	GO:0051701	interaction with host	-5.61825	-3.09891	9/210	950,3383,3434,3965,6737,10318,11043,57617,81607	SCARB2,ICAM1,IFIT1,LGALS9,TRIM21,TNIP1,MID2,VPS18,NECTIN4
10_Member	GO Biological Processes	GO:0046718	viral entry into host cell	-5.30717	-2.81417	7/122	950,3383,3965,6737,11043,57617,81607	SCARB2,ICAM1,LGALS9,TRIM21,MID2,VPS18,NECTIN4
10_Member	GO Biological Processes	GO:0030260	entry into host cell	-5.01741	-2.57271	7/135	950,3383,3965,6737,11043,57617,81607	SCARB2,ICAM1,LGALS9,TRIM21,MID2,VPS18,NECTIN4
10_Member	GO Biological Processes	GO:0044409	entry into host	-5.01741	-2.57271	7/135	950,3383,3965,6737,11043,57617,81607	SCARB2,ICAM1,LGALS9,TRIM21,MID2,VPS18,NECTIN4
10_Member	GO Biological Processes	GO:0051806	entry into cell of other organism involved in symbiotic interaction	-5.01741	-2.57271	7/135	950,3383,3965,6737,11043,57617,81607	SCARB2,ICAM1,LGALS9,TRIM21,MID2,VPS18,NECTIN4
10_Member	GO Biological Processes	GO:0051828	entry into other organism involved in symbiotic interaction	-5.01741	-2.57271	7/135	950,3383,3965,6737,11043,57617,81607	SCARB2,ICAM1,LGALS9,TRIM21,MID2,VPS18,NECTIN4
10_Member	GO Biological Processes	GO:0046596	regulation of viral entry into host cell	-3.23557	-1.06438	3/30	3965,6737,11043	LGALS9,TRIM21,MID2
11_Summary	GO Biological Processes	GO:0009617	response to bacterium	-5.14775	-2.67145	15/702	567,961,3383,3934,3965,4615,4791,4792,4939,9636,10133,51510,51752,55008,129607,2633,8878,1649,196,5530,6772	B2M,CD47,ICAM1,LCN2,LGALS9,MYD88,NFKB2,NFKBIA,OAS2,ISG15,OPTN,CHMP5,ERAP1,HERC6,CMPK2,GBP1,SQSTM1,DDIT3,AHR,PPP3CA,STAT1
11_Member	GO Biological Processes	GO:0009617	response to bacterium	-5.14775	-2.67145	15/702	567,961,3383,3934,3965,4615,4791,4792,4939,9636,10133,51510,51752,55008,129607	B2M,CD47,ICAM1,LCN2,LGALS9,MYD88,NFKB2,NFKBIA,OAS2,ISG15,OPTN,CHMP5,ERAP1,HERC6,CMPK2
11_Member	GO Biological Processes	GO:0070555	response to interleukin-1	-4.72458	-2.3164	8/207	961,2633,3383,3934,3965,4615,4792,8878	CD47,GBP1,ICAM1,LCN2,LGALS9,MYD88,NFKBIA,SQSTM1
11_Member	GO Biological Processes	GO:0071347	cellular response to interleukin-1	-4.22891	-1.89165	7/179	961,2633,3383,3934,4615,4792,8878	CD47,GBP1,ICAM1,LCN2,MYD88,NFKBIA,SQSTM1
11_Member	GO Biological Processes	GO:0002237	response to molecule of bacterial origin	-3.21447	-1.05132	8/343	567,3383,3934,3965,4791,4792,51510,129607	B2M,ICAM1,LCN2,LGALS9,NFKB2,NFKBIA,CHMP5,CMPK2
11_Member	GO Biological Processes	GO:0071216	cellular response to biotic stimulus	-2.71645	-0.639726	6/236	1649,3383,3934,4792,51510,129607	DDIT3,ICAM1,LCN2,NFKBIA,CHMP5,CMPK2
11_Member	GO Biological Processes	GO:0032496	response to lipopolysaccharide	-2.63992	-0.591042	7/330	3383,3934,3965,4791,4792,51510,129607	ICAM1,LCN2,LGALS9,NFKB2,NFKBIA,CHMP5,CMPK2
11_Member	GO Biological Processes	GO:0071222	cellular response to lipopolysaccharide	-2.26472	-0.316998	5/205	3383,3934,4792,51510,129607	ICAM1,LCN2,NFKBIA,CHMP5,CMPK2
11_Member	GO Biological Processes	GO:0071219	cellular response to molecule of bacterial origin	-2.20417	-0.266044	5/212	3383,3934,4792,51510,129607	ICAM1,LCN2,NFKBIA,CHMP5,CMPK2
11_Member	GO Biological Processes	GO:0035690	cellular response to drug	-1.79499	0	6/369	196,567,3383,3934,5530,51510	AHR,B2M,ICAM1,LCN2,PPP3CA,CHMP5
11_Member	GO Biological Processes	GO:0071356	cellular response to tumor necrosis factor	-1.65744	0	5/291	2633,3383,3934,4792,6772	GBP1,ICAM1,LCN2,NFKBIA,STAT1
11_Member	GO Biological Processes	GO:0034612	response to tumor necrosis factor	-1.54384	0	5/312	2633,3383,3934,4792,6772	GBP1,ICAM1,LCN2,NFKBIA,STAT1
12_Summary	GO Biological Processes	GO:0010506	regulation of autophagy	-4.84913	-2.4267	10/330	527,1649,2081,6720,6737,10133,11043,26353,55332,116442,8878,57617,23327,151636,221662,2633,6249,63971	ATP6V0C,DDIT3,ERN1,SREBF1,TRIM21,OPTN,MID2,HSPB8,DRAM1,RAB39B,SQSTM1,VPS18,NEDD4L,DTX3L,RBM24,GBP1,CLIP1,KIF13A
12_Member	GO Biological Processes	GO:0010506	regulation of autophagy	-4.84913	-2.4267	10/330	527,1649,2081,6720,6737,10133,11043,26353,55332,116442	ATP6V0C,DDIT3,ERN1,SREBF1,TRIM21,OPTN,MID2,HSPB8,DRAM1,RAB39B
12_Member	GO Biological Processes	GO:0006914	autophagy	-4.67313	-2.28872	12/503	527,1649,2081,6720,6737,8878,10133,11043,26353,55332,57617,116442	ATP6V0C,DDIT3,ERN1,SREBF1,TRIM21,SQSTM1,OPTN,MID2,HSPB8,DRAM1,VPS18,RAB39B
12_Member	GO Biological Processes	GO:0061919	process utilizing autophagic mechanism	-4.67313	-2.28872	12/503	527,1649,2081,6720,6737,8878,10133,11043,26353,55332,57617,116442	ATP6V0C,DDIT3,ERN1,SREBF1,TRIM21,SQSTM1,OPTN,MID2,HSPB8,DRAM1,VPS18,RAB39B
12_Member	GO Biological Processes	GO:0061912	selective autophagy	-2.5864	-0.559012	3/50	8878,10133,26353	SQSTM1,OPTN,HSPB8
12_Member	GO Biological Processes	GO:0010508	positive regulation of autophagy	-2.40627	-0.431003	4/117	6737,10133,11043,26353	TRIM21,OPTN,MID2,HSPB8
12_Member	GO Biological Processes	GO:0000422	autophagy of mitochondrion	-2.07637	-0.178988	3/76	6720,8878,10133	SREBF1,SQSTM1,OPTN
12_Member	GO Biological Processes	GO:0061726	mitochondrion disassembly	-2.07637	-0.178988	3/76	6720,8878,10133	SREBF1,SQSTM1,OPTN
12_Member	GO Biological Processes	GO:0009896	positive regulation of catabolic process	-2.05367	-0.166959	7/424	6737,10133,11043,23327,26353,151636,221662	TRIM21,OPTN,MID2,NEDD4L,HSPB8,DTX3L,RBM24
12_Member	GO Biological Processes	GO:0016241	regulation of macroautophagy	-1.83734	-0.0187797	4/171	527,2081,10133,26353	ATP6V0C,ERN1,OPTN,HSPB8
12_Member	GO Biological Processes	GO:0031331	positive regulation of cellular catabolic process	-1.83199	-0.0152313	6/362	6737,10133,11043,26353,151636,221662	TRIM21,OPTN,MID2,HSPB8,DTX3L,RBM24
12_Member	GO Biological Processes	GO:1903008	organelle disassembly	-1.74418	0	3/101	6720,8878,10133	SREBF1,SQSTM1,OPTN
12_Member	GO Biological Processes	GO:0016236	macroautophagy	-1.60745	0	5/300	527,2081,8878,10133,26353	ATP6V0C,ERN1,SQSTM1,OPTN,HSPB8
12_Member	GO Biological Processes	GO:1990778	protein localization to cell periphery	-1.53869	0	5/313	2633,6249,8878,10133,63971	GBP1,CLIP1,SQSTM1,OPTN,KIF13A
13_Summary	GO Biological Processes	GO:0030099	myeloid cell differentiation	-4.71187	-2.31064	11/418	103,537,567,3965,4792,5971,6772,7030,8365,9636,333932,3659	ADAR,ATP6AP1,B2M,LGALS9,NFKBIA,RELB,STAT1,TFE3,H4C8,ISG15,H3C15,IRF1
13_Member	GO Biological Processes	GO:0030099	myeloid cell differentiation	-4.71187	-2.31064	11/418	103,537,567,3965,4792,5971,6772,7030,8365,9636,333932	ADAR,ATP6AP1,B2M,LGALS9,NFKBIA,RELB,STAT1,TFE3,H4C8,ISG15,H3C15
13_Member	GO Biological Processes	GO:0045637	regulation of myeloid cell differentiation	-4.11931	-1.79379	8/252	537,567,4792,6772,7030,8365,9636,333932	ATP6AP1,B2M,NFKBIA,STAT1,TFE3,H4C8,ISG15,H3C15
13_Member	GO Biological Processes	GO:1903706	regulation of hemopoiesis	-3.52361	-1.27728	10/477	537,567,3659,3965,4792,6772,7030,8365,9636,333932	ATP6AP1,B2M,IRF1,LGALS9,NFKBIA,STAT1,TFE3,H4C8,ISG15,H3C15
13_Member	GO Biological Processes	GO:0045646	regulation of erythrocyte differentiation	-2.63726	-0.591042	3/48	567,6772,9636	B2M,STAT1,ISG15
13_Member	GO Biological Processes	GO:0030218	erythrocyte differentiation	-2.43299	-0.449898	4/115	103,567,6772,9636	ADAR,B2M,STAT1,ISG15
13_Member	GO Biological Processes	GO:0034101	erythrocyte homeostasis	-2.32916	-0.364112	4/123	103,567,6772,9636	ADAR,B2M,STAT1,ISG15
13_Member	GO Biological Processes	GO:0002262	myeloid cell homeostasis	-2.04928	-0.164675	4/148	103,567,6772,9636	ADAR,B2M,STAT1,ISG15
13_Member	GO Biological Processes	GO:0048872	homeostasis of number of cells	-1.93459	-0.0861995	5/247	103,567,3965,6772,9636	ADAR,B2M,LGALS9,STAT1,ISG15
13_Member	GO Biological Processes	GO:0045639	positive regulation of myeloid cell differentiation	-1.85174	-0.0240764	3/92	537,6772,9636	ATP6AP1,STAT1,ISG15
13_Member	GO Biological Processes	GO:1903708	positive regulation of hemopoiesis	-1.70179	0	4/188	537,3965,6772,9636	ATP6AP1,LGALS9,STAT1,ISG15
14_Summary	GO Biological Processes	GO:0007041	lysosomal transport	-4.56338	-2.18887	6/107	950,3482,51510,57617,63971,151636,4669,8878,6386,10133,5359	SCARB2,IGF2R,CHMP5,VPS18,KIF13A,DTX3L,NAGLU,SQSTM1,SDCBP,OPTN,PLSCR1
14_Member	GO Biological Processes	GO:0007041	lysosomal transport	-4.56338	-2.18887	6/107	950,3482,51510,57617,63971,151636	SCARB2,IGF2R,CHMP5,VPS18,KIF13A,DTX3L
14_Member	GO Biological Processes	GO:0007034	vacuolar transport	-3.86141	-1.56932	6/143	950,3482,51510,57617,63971,151636	SCARB2,IGF2R,CHMP5,VPS18,KIF13A,DTX3L
14_Member	GO Biological Processes	GO:0008333	endosome to lysosome transport	-3.48437	-1.25227	4/60	51510,57617,63971,151636	CHMP5,VPS18,KIF13A,DTX3L
14_Member	GO Biological Processes	GO:0007040	lysosome organization	-3.45674	-1.2518	4/61	950,4669,51510,57617	SCARB2,NAGLU,CHMP5,VPS18
14_Member	GO Biological Processes	GO:0080171	lytic vacuole organization	-3.45674	-1.2518	4/61	950,4669,51510,57617	SCARB2,NAGLU,CHMP5,VPS18
14_Member	GO Biological Processes	GO:0007032	endosome organization	-3.03037	-0.901674	4/79	950,8878,51510,57617	SCARB2,SQSTM1,CHMP5,VPS18
14_Member	GO Biological Processes	GO:0007033	vacuole organization	-1.90695	-0.060847	4/163	950,4669,51510,57617	SCARB2,NAGLU,CHMP5,VPS18
14_Member	GO Biological Processes	GO:0043112	receptor metabolic process	-1.65751	0	4/194	6386,10133,51510,151636	SDCBP,OPTN,CHMP5,DTX3L
14_Member	GO Biological Processes	GO:0010256	endomembrane system organization	-1.45527	0	6/443	950,5359,8878,10133,51510,57617	SCARB2,PLSCR1,SQSTM1,OPTN,CHMP5,VPS18
15_Summary	GO Biological Processes	GO:0006471	protein ADP-ribosylation	-4.31046	-1.95498	4/37	54625,64761,83666,84875,11182	PARP14,PARP12,PARP9,PARP10,SLC2A6
15_Member	GO Biological Processes	GO:0006471	protein ADP-ribosylation	-4.31046	-1.95498	4/37	54625,64761,83666,84875	PARP14,PARP12,PARP9,PARP10
15_Member	GO Biological Processes	GO:0019359	nicotinamide nucleotide biosynthetic process	-1.32885	0	3/147	11182,83666,84875	SLC2A6,PARP9,PARP10
15_Member	GO Biological Processes	GO:0019363	pyridine nucleotide biosynthetic process	-1.32885	0	3/147	11182,83666,84875	SLC2A6,PARP9,PARP10
15_Member	GO Biological Processes	GO:0072525	pyridine-containing compound biosynthetic process	-1.30738	0	3/150	11182,83666,84875	SLC2A6,PARP9,PARP10
16_Summary	GO Biological Processes	GO:0050688	regulation of defense response to virus	-4.29789	-1.94857	5/73	3434,6772,55601,83666,151636,10133,567,684,961,3965,91543,5530,8365,9246,9636,25939,84875	IFIT1,STAT1,DDX60,PARP9,DTX3L,OPTN,B2M,BST2,CD47,LGALS9,RSAD2,PPP3CA,H4C8,UBE2L6,ISG15,SAMHD1,PARP10
16_Member	GO Biological Processes	GO:0050688	regulation of defense response to virus	-4.29789	-1.94857	5/73	3434,6772,55601,83666,151636	IFIT1,STAT1,DDX60,PARP9,DTX3L
16_Member	GO Biological Processes	GO:0002831	regulation of response to biotic stimulus	-3.92897	-1.62433	6/139	3434,6772,10133,55601,83666,151636	IFIT1,STAT1,OPTN,DDX60,PARP9,DTX3L
16_Member	GO Biological Processes	GO:0002697	regulation of immune effector process	-3.63385	-1.36269	10/462	567,684,961,3434,3965,6772,55601,83666,91543,151636	B2M,BST2,CD47,IFIT1,LGALS9,STAT1,DDX60,PARP9,RSAD2,DTX3L
16_Member	GO Biological Processes	GO:0035561	regulation of chromatin binding	-3.58375	-1.33256	3/23	5530,83666,151636	PPP3CA,PARP9,DTX3L
16_Member	GO Biological Processes	GO:0002230	positive regulation of defense response to virus by host	-3.42219	-1.22162	3/26	6772,83666,151636	STAT1,PARP9,DTX3L
16_Member	GO Biological Processes	GO:0050691	regulation of defense response to virus by host	-2.96579	-0.855122	3/37	6772,83666,151636	STAT1,PARP9,DTX3L
16_Member	GO Biological Processes	GO:0006303	double-strand break repair via nonhomologous end joining	-1.87729	-0.040322	3/90	8365,83666,151636	H4C8,PARP9,DTX3L
16_Member	GO Biological Processes	GO:0000726	non-recombinational repair	-1.77877	0	3/98	8365,83666,151636	H4C8,PARP9,DTX3L
16_Member	GO Biological Processes	GO:0006281	DNA repair	-1.4887	0	7/553	8365,9246,9636,25939,83666,84875,151636	H4C8,UBE2L6,ISG15,SAMHD1,PARP9,PARP10,DTX3L
16_Member	GO Biological Processes	GO:0006302	double-strand break repair	-1.32405	0	4/248	8365,25939,83666,151636	H4C8,SAMHD1,PARP9,DTX3L
17_Summary	GO Biological Processes	GO:0055072	iron ion homeostasis	-4.13303	-1.80168	5/79	537,567,2495,3934,10058,527,1001,1512,1649,1778,7030,23327	ATP6AP1,B2M,FTH1,LCN2,ABCB6,ATP6V0C,CDH3,CTSH,DDIT3,DYNC1H1,TFE3,NEDD4L
17_Member	GO Biological Processes	GO:0055072	iron ion homeostasis	-4.13303	-1.80168	5/79	537,567,2495,3934,10058	ATP6AP1,B2M,FTH1,LCN2,ABCB6
17_Member	GO Biological Processes	GO:0006879	cellular iron ion homeostasis	-3.45674	-1.2518	4/61	537,2495,3934,10058	ATP6AP1,FTH1,LCN2,ABCB6
17_Member	GO Biological Processes	GO:0006826	iron ion transport	-3.37675	-1.18901	4/64	527,537,567,2495	ATP6V0C,ATP6AP1,B2M,FTH1
17_Member	GO Biological Processes	GO:0055076	transition metal ion homeostasis	-3.11052	-0.963021	5/131	537,567,2495,3934,10058	ATP6AP1,B2M,FTH1,LCN2,ABCB6
17_Member	GO Biological Processes	GO:0046916	cellular transition metal ion homeostasis	-2.53088	-0.526205	4/108	537,2495,3934,10058	ATP6AP1,FTH1,LCN2,ABCB6
17_Member	GO Biological Processes	GO:0000041	transition metal ion transport	-2.47409	-0.478928	4/112	527,537,567,2495	ATP6V0C,ATP6AP1,B2M,FTH1
17_Member	GO Biological Processes	GO:0048871	multicellular organismal homeostasis	-2.27885	-0.326245	8/485	537,567,1001,1512,1649,1778,3934,7030	ATP6AP1,B2M,CDH3,CTSH,DDIT3,DYNC1H1,LCN2,TFE3
17_Member	GO Biological Processes	GO:0001894	tissue homeostasis	-1.44148	0	4/227	537,567,1001,1512	ATP6AP1,B2M,CDH3,CTSH
17_Member	GO Biological Processes	GO:0055080	cation homeostasis	-1.32224	0	8/731	527,537,567,1649,2495,3934,10058,23327	ATP6V0C,ATP6AP1,B2M,DDIT3,FTH1,LCN2,ABCB6,NEDD4L
18_Summary	GO Biological Processes	GO:0043902	positive regulation of multi-organism process	-4.09489	-1.77512	7/188	103,3434,3482,3965,6737,10133,55601,2537	ADAR,IFIT1,IGF2R,LGALS9,TRIM21,OPTN,DDX60,IFI6
18_Member	GO Biological Processes	GO:0043902	positive regulation of multi-organism process	-4.09489	-1.77512	7/188	103,3434,3482,3965,6737,10133,55601	ADAR,IFIT1,IGF2R,LGALS9,TRIM21,OPTN,DDX60
18_Member	GO Biological Processes	GO:0098586	cellular response to virus	-3.60013	-1.33907	4/56	103,2537,3965,55601	ADAR,IFI6,LGALS9,DDX60
18_Member	GO Biological Processes	GO:0048524	positive regulation of viral process	-3.51232	-1.27553	5/107	103,3434,3482,3965,6737	ADAR,IFIT1,IGF2R,LGALS9,TRIM21
18_Member	GO Biological Processes	GO:1903902	positive regulation of viral life cycle	-3.45674	-1.2518	4/61	103,3434,3965,6737	ADAR,IFIT1,LGALS9,TRIM21
19_Summary	GO Biological Processes	GO:1903321	negative regulation of protein modification by small protein conjugation or removal	-3.90995	-1.61247	5/88	3301,6737,9636,84875,151636,9246,10318,5971	DNAJA1,TRIM21,ISG15,PARP10,DTX3L,UBE2L6,TNIP1,RELB
19_Member	GO Biological Processes	GO:1903321	negative regulation of protein modification by small protein conjugation or removal	-3.90995	-1.61247	5/88	3301,6737,9636,84875,151636	DNAJA1,TRIM21,ISG15,PARP10,DTX3L
19_Member	GO Biological Processes	GO:0031397	negative regulation of protein ubiquitination	-3.07215	-0.932268	4/77	3301,9636,84875,151636	DNAJA1,ISG15,PARP10,DTX3L
19_Member	GO Biological Processes	GO:0019985	translesion synthesis	-2.83537	-0.745384	3/41	9246,9636,84875	UBE2L6,ISG15,PARP10
19_Member	GO Biological Processes	GO:1903320	regulation of protein modification by small protein conjugation or removal	-2.76328	-0.679972	6/231	3301,6737,9636,10318,84875,151636	DNAJA1,TRIM21,ISG15,TNIP1,PARP10,DTX3L
19_Member	GO Biological Processes	GO:0032480	negative regulation of type I interferon production	-2.69049	-0.626632	3/46	5971,9246,9636	RELB,UBE2L6,ISG15
19_Member	GO Biological Processes	GO:0000731	DNA synthesis involved in DNA repair	-2.5618	-0.539297	3/51	9246,9636,84875	UBE2L6,ISG15,PARP10
19_Member	GO Biological Processes	GO:0006301	postreplication repair	-2.53771	-0.526205	3/52	9246,9636,84875	UBE2L6,ISG15,PARP10
19_Member	GO Biological Processes	GO:0031396	regulation of protein ubiquitination	-1.5874	0	4/204	3301,9636,84875,151636	DNAJA1,ISG15,PARP10,DTX3L
20_Summary	GO Biological Processes	GO:0035455	response to interferon-alpha	-3.70464	-1.42314	3/21	103,684,3437	ADAR,BST2,IFIT3
20_Member	GO Biological Processes	GO:0035455	response to interferon-alpha	-3.70464	-1.42314	3/21	103,684,3437	ADAR,BST2,IFIT3

## Sheet: Annotation_down_LNA
Input ID	Gene ID	Type	Tax ID	Homologene Gene ID	Homologene Gene Tax ID	GO:0071363 cellular response to growth fa	GO:0010976 positive regulation of neuron	GO:0030521 androgen receptor signaling pa	GO:0030201 heparan sulfate proteoglycan m	GO:0040037 negative regulation of fibrobl	GO:0051783 regulation of nuclear division	GO:0009792 embryo development ending in b	GO:0043405 regulation of MAP kinase activ	GO:0045637 regulation of myeloid cell dif	GO:0001568 blood vessel development	GO:0097120 receptor localization to synap	GO:0043087 regulation of GTPase activity	GO:0001890 placenta development	GO:0034644 cellular response to UV	GO:0051403 stress-activated MAPK cascade	GO:0045185 maintenance of protein locatio	GO:0006511 ubiquitin-dependent protein ca	GO:0022612 gland morphogenesis	GO:0000302 response to reactive oxygen sp	GO:0018210 peptidyl-threonine modificatio
LRP1B	53353	symbol	H. sapiens	53353	H. sapiens	0	0	0	0	0	0	0	0	0	0	0	0	0	0	0	0	0	0	0	0
PLCB1	23236	symbol	H. sapiens	23236	H. sapiens	0	1	1	1	1	1	0	1	1	1	1	1	0	0	1	1	0	1	0	0
TM4SF1	4071	symbol	H. sapiens	4071	H. sapiens	0	0	0	0	0	0	1	0	0	0	0	0	0	0	0	0	0	0	0	0
GABBR1	2550	symbol	H. sapiens	2550	H. sapiens	0	0	0	0	0	0	0	0	0	0	0	0	0	0	0	0	0	0	0	0
CLSTN2	64084	symbol	H. sapiens	64084	H. sapiens	0	1	0	0	0	0	0	0	0	0	1	0	0	0	0	0	0	0	0	0
FLT1	2321	symbol	H. sapiens	2321	H. sapiens	1	1	0	0	0	0	1	1	0	1	0	1	0	0	0	0	0	0	0	0
PXYLP1	92370	symbol	H. sapiens	92370	H. sapiens	0	0	0	1	0	0	0	0	0	0	0	0	0	0	0	0	0	0	0	0
PLEKHG4	25894	symbol	H. sapiens	25894	H. sapiens	0	0	0	0	0	0	0	0	0	0	0	1	0	0	0	0	0	0	0	0
PLXNA4	91584	symbol	H. sapiens	91584	H. sapiens	0	1	0	0	0	0	0	0	0	0	0	1	0	0	0	0	0	0	0	0
NCKAP5	344148	symbol	H. sapiens	344148	H. sapiens	0	0	0	0	0	0	0	0	0	0	0	0	0	0	0	0	1	0	0	0
ATP11C	286410	symbol	H. sapiens	286410	H. sapiens	0	0	0	0	0	0	0	0	1	0	0	0	0	0	0	0	0	0	0	0
GRIP1	23426	symbol	H. sapiens	23426	H. sapiens	0	1	1	0	0	0	0	0	0	0	1	0	0	0	0	0	0	0	0	0
XYLT1	64131	symbol	H. sapiens	64131	H. sapiens	0	0	0	1	0	0	1	0	0	0	0	0	0	0	0	0	0	1	0	0
LTBP1	4052	symbol	H. sapiens	4052	H. sapiens	1	0	0	0	0	0	1	0	0	1	0	0	0	0	0	1	0	0	0	0
SIAE	54414	symbol	H. sapiens	54414	H. sapiens	0	0	0	0	0	0	0	0	0	0	0	0	0	0	0	0	0	0	0	0
ERCC6L2	375748	symbol	H. sapiens	375748	H. sapiens	0	0	0	0	0	0	0	0	0	0	0	0	0	0	0	0	0	0	1	0
CAV2	858	symbol	H. sapiens	858	H. sapiens	1	0	1	0	0	1	0	1	0	1	0	1	0	0	0	0	0	0	0	0
TTC28	23331	symbol	H. sapiens	23331	H. sapiens	0	0	0	0	0	1	0	0	0	0	0	0	0	0	0	0	0	0	0	0
STOX2	56977	symbol	H. sapiens	56977	H. sapiens	0	0	0	0	0	0	1	0	0	0	0	0	1	0	0	0	0	0	0	0
LRRN2	10446	symbol	H. sapiens	10446	H. sapiens	0	0	0	0	0	0	0	0	0	0	0	0	0	0	0	0	0	0	0	0
KLF13	51621	symbol	H. sapiens	51621	H. sapiens	0	0	0	0	0	0	0	0	1	1	0	0	0	0	0	0	0	0	0	0
HS6ST3	266722	symbol	H. sapiens	266722	H. sapiens	0	0	0	1	0	0	0	0	0	0	0	0	0	0	0	0	0	0	0	0
ABLIM1	3983	symbol	H. sapiens	3983	H. sapiens	0	0	0	0	0	0	0	0	0	0	0	0	0	0	0	0	0	0	0	0
DUSP4	1846	symbol	H. sapiens	1846	H. sapiens	0	0	0	0	0	0	0	1	0	0	0	0	0	0	0	0	0	0	0	0
RNF19A	25897	symbol	H. sapiens	25897	H. sapiens	0	0	0	0	0	0	0	0	0	0	1	0	0	0	0	0	1	0	0	0
USP34	9736	symbol	H. sapiens	9736	H. sapiens	0	0	0	0	0	0	0	0	0	0	0	0	0	0	0	0	1	0	0	0
CCDC91	55297	symbol	H. sapiens	55297	H. sapiens	0	0	0	0	0	0	0	0	0	0	0	0	0	0	0	0	0	0	0	0
RNF150	57484	symbol	H. sapiens	57484	H. sapiens	0	0	0	0	0	0	0	0	0	0	0	0	0	0	0	0	1	0	0	0
SHISA2	387914	symbol	H. sapiens	387914	H. sapiens	1	0	0	0	1	0	0	0	0	1	0	0	0	0	0	0	0	0	0	0
RASAL2	9462	symbol	H. sapiens	9462	H. sapiens	0	0	0	0	0	0	0	0	0	0	0	1	0	0	0	0	0	0	0	0
COL5A1	1289	symbol	H. sapiens	1289	H. sapiens	0	0	0	0	0	1	1	0	0	1	0	0	0	0	0	0	0	1	0	0
BMP7	655	symbol	H. sapiens	655	H. sapiens	1	1	1	0	1	1	1	1	0	1	0	0	1	0	1	0	0	1	1	1
TARSL2	123283	symbol	H. sapiens	123283	H. sapiens	0	0	0	0	0	0	0	0	0	0	0	0	0	0	0	0	0	0	0	0
WASHC4	23325	symbol	H. sapiens	23325	H. sapiens	0	0	0	0	0	1	0	0	0	0	0	0	0	0	0	0	0	0	0	0
NHS	4810	symbol	H. sapiens	4810	H. sapiens	0	0	0	0	0	0	0	0	0	0	0	0	0	0	0	0	0	0	0	0
CERS1	10715	symbol	H. sapiens	10715	H. sapiens	0	0	0	0	0	0	0	0	0	0	0	0	0	1	0	0	0	0	0	0
ZNF195	7748	symbol	H. sapiens	7748	H. sapiens	0	0	0	0	0	0	0	0	0	0	0	0	0	0	0	0	0	0	0	0
RNF4	6047	symbol	H. sapiens	6047	H. sapiens	0	0	1	0	0	1	0	0	0	0	0	0	0	0	0	0	1	0	0	0
ZNF681	148213	symbol	H. sapiens	148213	H. sapiens	0	0	0	0	0	0	0	0	0	0	0	0	0	0	0	0	0	0	0	0
ZC2HC1A	51101	symbol	H. sapiens	51101	H. sapiens	0	0	0	0	0	0	0	0	0	0	0	0	0	0	0	0	0	0	0	0
MXI1	4601	symbol	H. sapiens	4601	H. sapiens	0	0	0	0	0	0	0	0	0	1	0	0	0	0	0	1	0	0	0	0
HECW2	57520	symbol	H. sapiens	57520	H. sapiens	0	1	0	0	0	1	0	0	0	0	0	0	0	0	0	0	1	0	0	0
LYPD1	116372	symbol	H. sapiens	116372	H. sapiens	0	0	1	0	0	0	0	0	0	0	1	0	0	0	0	0	0	0	0	0
INAVA	55765	symbol	H. sapiens	55765	H. sapiens	0	0	1	0	1	0	0	1	0	0	0	0	0	0	1	0	0	0	0	0
SBK1	388228	symbol	H. sapiens	388228	H. sapiens	0	0	0	0	0	0	0	0	0	0	0	0	0	0	0	0	0	0	0	1
FSTL3	10272	symbol	H. sapiens	10272	H. sapiens	1	1	0	0	0	0	0	0	1	0	0	0	1	0	0	0	0	1	0	0
WWC2	80014	symbol	H. sapiens	80014	H. sapiens	0	1	0	0	0	0	0	1	0	0	0	0	0	0	0	0	0	0	0	0
ITFG1	81533	symbol	H. sapiens	81533	H. sapiens	0	0	0	0	0	0	0	0	0	0	0	0	0	0	0	0	0	0	0	0
TES	26136	symbol	H. sapiens	26136	H. sapiens	0	0	0	0	0	0	0	0	0	1	0	0	0	0	0	0	0	0	0	0
FBXL17	64839	symbol	H. sapiens	64839	H. sapiens	0	0	0	0	0	0	0	0	0	0	0	0	1	0	0	0	1	0	0	0
TRIQK	286144	symbol	H. sapiens	286144	H. sapiens	0	0	0	0	0	0	0	0	0	0	0	0	0	0	0	0	0	0	0	0
SETBP1	26040	symbol	H. sapiens	26040	H. sapiens	0	0	0	0	0	0	0	0	0	0	0	0	0	0	0	0	0	0	0	0
NKAIN1	79570	symbol	H. sapiens	79570	H. sapiens	0	0	0	0	0	0	0	0	0	0	0	0	0	0	0	0	0	0	0	0
MICAL2	9645	symbol	H. sapiens	9645	H. sapiens	0	0	0	0	0	0	1	0	0	0	0	0	0	0	0	0	0	0	0	0
FHL2	2274	symbol	H. sapiens	2274	H. sapiens	0	0	1	0	0	0	0	1	0	0	0	0	0	0	0	0	0	0	0	0
COL18A1	80781	symbol	H. sapiens	80781	H. sapiens	0	1	0	0	0	0	0	0	0	1	0	0	0	0	0	0	0	1	0	0
CUL7	9820	symbol	H. sapiens	9820	H. sapiens	0	1	0	0	1	1	0	0	0	1	0	0	1	0	0	0	1	0	0	0
CABLES1	91768	symbol	H. sapiens	91768	H. sapiens	0	0	0	0	0	0	0	0	0	0	0	0	0	0	0	0	0	0	0	0
JAG2	3714	symbol	H. sapiens	3714	H. sapiens	0	1	0	0	0	0	1	0	1	1	0	0	0	0	0	0	0	0	0	0
PLEKHA7	144100	symbol	H. sapiens	144100	H. sapiens	0	0	0	0	0	0	0	1	0	0	0	0	0	0	0	0	0	0	0	0
GALNT2	2590	symbol	H. sapiens	2590	H. sapiens	0	0	0	1	0	0	0	0	0	0	0	0	0	0	0	0	0	0	0	1
ADAM9	8754	symbol	H. sapiens	8754	H. sapiens	1	1	1	0	0	0	0	1	0	1	0	0	0	0	0	0	0	0	1	0
NEBL	10529	symbol	H. sapiens	10529	H. sapiens	0	0	0	0	0	1	1	0	0	0	0	0	0	0	0	0	0	0	0	0
CARNMT1	138199	symbol	H. sapiens	138199	H. sapiens	0	0	0	0	0	0	0	0	0	0	0	0	0	0	0	0	0	0	0	0
PLXNA1	5361	symbol	H. sapiens	5361	H. sapiens	0	1	0	0	0	0	0	0	0	0	0	1	0	0	0	0	0	1	0	0
IPMK	253430	symbol	H. sapiens	253430	H. sapiens	0	0	0	0	0	0	0	0	0	0	0	0	0	0	0	0	0	0	0	0
PMEPA1	56937	symbol	H. sapiens	56937	H. sapiens	1	0	1	0	0	0	0	0	0	0	0	0	0	0	0	0	0	0	0	0
PTPRK	5796	symbol	H. sapiens	5796	H. sapiens	1	0	0	0	0	0	0	1	0	1	0	0	0	1	0	0	0	0	1	0
SULF2	55959	symbol	H. sapiens	55959	H. sapiens	1	0	0	1	1	0	1	0	0	1	0	0	0	0	0	0	0	1	0	0
NEK6	10783	symbol	H. sapiens	10783	H. sapiens	0	0	0	0	0	1	0	0	0	0	0	0	0	0	1	0	1	0	0	0
TUBB3	10381	symbol	H. sapiens	10381	H. sapiens	0	1	0	0	0	0	0	0	0	0	0	0	0	0	0	0	1	0	0	0
PRRC2B	84726	symbol	H. sapiens	84726	H. sapiens	0	0	0	0	0	0	0	0	0	0	0	0	0	0	0	0	0	0	0	0
SLC4A7	9497	symbol	H. sapiens	9497	H. sapiens	0	0	0	0	0	0	0	0	0	0	0	0	0	0	0	0	0	0	0	0
RAPGEF1	2889	symbol	H. sapiens	2889	H. sapiens	1	1	1	0	0	0	0	1	0	1	0	1	0	0	1	0	0	0	0	0
DBN1	1627	symbol	H. sapiens	1627	H. sapiens	0	1	0	0	0	0	1	0	0	0	1	0	0	0	0	1	0	0	0	0
PODXL2	50512	symbol	H. sapiens	50512	H. sapiens	0	0	0	0	0	0	0	0	0	0	0	0	0	0	0	0	0	0	0	0
SLC39A10	57181	symbol	H. sapiens	57181	H. sapiens	0	0	0	0	0	0	0	0	1	0	0	1	0	0	0	0	0	0	0	0
CUX1	1523	symbol	H. sapiens	1523	H. sapiens	0	1	0	0	0	0	0	0	0	0	0	0	0	0	0	0	0	0	0	0
THBS1	7057	symbol	H. sapiens	7057	H. sapiens	1	1	1	0	1	0	0	1	1	1	0	0	0	0	0	0	0	1	0	0
NAA15	80155	symbol	H. sapiens	80155	H. sapiens	0	0	0	0	0	0	0	0	0	1	0	0	0	0	0	0	0	0	0	0
DIP2C	22982	symbol	H. sapiens	22982	H. sapiens	0	0	0	0	0	0	0	0	0	0	0	0	0	0	0	0	0	0	0	0
CACNG4	27092	symbol	H. sapiens	27092	H. sapiens	0	0	0	0	0	0	0	0	0	0	1	0	0	0	0	0	0	0	0	0
UNK	85451	symbol	H. sapiens	85451	H. sapiens	0	1	0	0	0	0	1	0	0	0	0	0	0	0	0	0	0	0	0	0
FAM210B	116151	symbol	H. sapiens	116151	H. sapiens	0	0	1	0	0	0	0	0	1	0	0	0	0	0	0	0	0	0	0	0
TXLNG	55787	symbol	H. sapiens	55787	H. sapiens	0	0	0	0	0	1	0	0	0	0	0	0	0	0	0	0	0	0	0	0
RB1CC1	9821	symbol	H. sapiens	9821	H. sapiens	0	1	0	0	0	0	1	1	0	0	0	0	0	0	1	0	0	1	0	0
PTGFRN	5738	symbol	H. sapiens	5738	H. sapiens	0	1	0	0	0	1	0	0	0	0	0	0	0	0	0	0	0	0	0	0
GLO1	2739	symbol	H. sapiens	2739	H. sapiens	0	0	0	0	0	0	0	0	1	0	0	0	0	0	0	0	0	0	0	0
AFF4	27125	symbol	H. sapiens	27125	H. sapiens	0	0	0	0	0	0	0	0	0	0	0	0	1	0	0	0	0	0	0	0
ZFP36L1	677	symbol	H. sapiens	677	H. sapiens	1	1	1	0	1	1	1	1	1	1	0	0	1	1	1	0	0	0	0	0
ACBD3	64746	symbol	H. sapiens	64746	H. sapiens	0	0	0	0	0	0	0	0	0	0	0	0	0	0	0	0	0	0	0	0
ZNF217	7764	symbol	H. sapiens	7764	H. sapiens	0	0	0	0	0	0	0	0	0	0	0	0	0	0	0	0	0	0	0	0
EP300	2033	symbol	H. sapiens	2033	H. sapiens	1	1	1	0	1	1	1	0	1	0	0	0	0	1	1	0	0	0	0	0

## Sheet: Enrichment_down_LNA
GroupID	Category	Term	Description	LogP	Log(q-value)	InTerm_InList	Genes	Symbols
1_Summary	GO Biological Processes	GO:0071363	cellular response to growth factor stimulus	-6.26728	-2.15398	14/709	655,677,858,2033,2321,2889,4052,5796,7057,8754,10272,55959,56937,387914	BMP7,ZFP36L1,CAV2,EP300,FLT1,RAPGEF1,LTBP1,PTPRK,THBS1,ADAM9,FSTL3,SULF2,PMEPA1,SHISA2
1_Member	GO Biological Processes	GO:0071363	cellular response to growth factor stimulus	-6.26728	-2.15398	14/709	655,677,858,2033,2321,2889,4052,5796,7057,8754,10272,55959,56937,387914	BMP7,ZFP36L1,CAV2,EP300,FLT1,RAPGEF1,LTBP1,PTPRK,THBS1,ADAM9,FSTL3,SULF2,PMEPA1,SHISA2
1_Member	GO Biological Processes	GO:0070848	response to growth factor	-6.05353	-2.15398	14/739	655,677,858,2033,2321,2889,4052,5796,7057,8754,10272,55959,56937,387914	BMP7,ZFP36L1,CAV2,EP300,FLT1,RAPGEF1,LTBP1,PTPRK,THBS1,ADAM9,FSTL3,SULF2,PMEPA1,SHISA2
1_Member	GO Biological Processes	GO:0090287	regulation of cellular response to growth factor stimulus	-5.70239	-2.10387	9/293	858,2033,2321,4052,7057,10272,55959,56937,387914	CAV2,EP300,FLT1,LTBP1,THBS1,FSTL3,SULF2,PMEPA1,SHISA2
1_Member	GO Biological Processes	GO:0090288	negative regulation of cellular response to growth factor stimulus	-5.43434	-1.99689	7/166	858,4052,7057,10272,55959,56937,387914	CAV2,LTBP1,THBS1,FSTL3,SULF2,PMEPA1,SHISA2
1_Member	GO Biological Processes	GO:0071560	cellular response to transforming growth factor beta stimulus	-5.22509	-1.86961	8/252	677,858,2033,4052,5796,7057,8754,56937	ZFP36L1,CAV2,EP300,LTBP1,PTPRK,THBS1,ADAM9,PMEPA1
1_Member	GO Biological Processes	GO:0071559	response to transforming growth factor beta	-5.15035	-1.85286	8/258	677,858,2033,4052,5796,7057,8754,56937	ZFP36L1,CAV2,EP300,LTBP1,PTPRK,THBS1,ADAM9,PMEPA1
1_Member	GO Biological Processes	GO:0007178	transmembrane receptor protein serine/threonine kinase signaling pathway	-5.04678	-1.80044	9/353	655,858,2033,4052,5796,7057,8754,10272,56937	BMP7,CAV2,EP300,LTBP1,PTPRK,THBS1,ADAM9,FSTL3,PMEPA1
1_Member	GO Biological Processes	GO:0007179	transforming growth factor beta receptor signaling pathway	-4.87627	-1.75334	7/202	858,2033,4052,5796,7057,8754,56937	CAV2,EP300,LTBP1,PTPRK,THBS1,ADAM9,PMEPA1
1_Member	GO Biological Processes	GO:0090092	regulation of transmembrane receptor protein serine/threonine kinase signaling pathway	-4.36209	-1.37966	7/243	655,858,2033,4052,7057,10272,56937	BMP7,CAV2,EP300,LTBP1,THBS1,FSTL3,PMEPA1
1_Member	GO Biological Processes	GO:0017015	regulation of transforming growth factor beta receptor signaling pathway	-3.97424	-1.15388	5/121	858,2033,4052,7057,56937	CAV2,EP300,LTBP1,THBS1,PMEPA1
1_Member	GO Biological Processes	GO:1903844	regulation of cellular response to transforming growth factor beta stimulus	-3.94067	-1.13803	5/123	858,2033,4052,7057,56937	CAV2,EP300,LTBP1,THBS1,PMEPA1
1_Member	GO Biological Processes	GO:0090101	negative regulation of transmembrane receptor protein serine/threonine kinase signaling pathway	-2.84152	-0.467022	4/126	858,4052,10272,56937	CAV2,LTBP1,FSTL3,PMEPA1
1_Member	GO Biological Processes	GO:0030512	negative regulation of transforming growth factor beta receptor signaling pathway	-2.42084	-0.132689	3/81	858,4052,56937	CAV2,LTBP1,PMEPA1
1_Member	GO Biological Processes	GO:1903845	negative regulation of cellular response to transforming growth factor beta stimulus	-2.39106	-0.130003	3/83	858,4052,56937	CAV2,LTBP1,PMEPA1
2_Summary	GO Biological Processes	GO:0010976	positive regulation of neuron projection development	-5.85181	-2.12835	9/281	655,1523,1627,2033,2889,5361,9820,23426,91584,57520,64084,10381,80781,85451,677,5738,23236,80014,2321,7057,3714,8754,10272,9821	BMP7,CUX1,DBN1,EP300,RAPGEF1,PLXNA1,CUL7,GRIP1,PLXNA4,HECW2,CLSTN2,TUBB3,COL18A1,UNK,ZFP36L1,PTGFRN,PLCB1,WWC2,FLT1,THBS1,JAG2,ADAM9,FSTL3,RB1CC1
2_Member	GO Biological Processes	GO:0010976	positive regulation of neuron projection development	-5.85181	-2.12835	9/281	655,1523,1627,2033,2889,5361,9820,23426,91584	BMP7,CUX1,DBN1,EP300,RAPGEF1,PLXNA1,CUL7,GRIP1,PLXNA4
2_Member	GO Biological Processes	GO:0045666	positive regulation of neuron differentiation	-4.87474	-1.75334	9/371	655,1523,1627,2033,2889,5361,9820,23426,91584	BMP7,CUX1,DBN1,EP300,RAPGEF1,PLXNA1,CUL7,GRIP1,PLXNA4
2_Member	GO Biological Processes	GO:0031346	positive regulation of cell projection organization	-4.76533	-1.69303	9/383	655,1523,1627,2033,2889,5361,9820,23426,91584	BMP7,CUX1,DBN1,EP300,RAPGEF1,PLXNA1,CUL7,GRIP1,PLXNA4
2_Member	GO Biological Processes	GO:0010975	regulation of neuron projection development	-4.64652	-1.62203	10/499	655,1523,1627,2033,2889,5361,9820,23426,57520,91584	BMP7,CUX1,DBN1,EP300,RAPGEF1,PLXNA1,CUL7,GRIP1,HECW2,PLXNA4
2_Member	GO Biological Processes	GO:0051962	positive regulation of nervous system development	-4.34979	-1.37966	10/541	655,1523,1627,2033,2889,5361,9820,23426,64084,91584	BMP7,CUX1,DBN1,EP300,RAPGEF1,PLXNA1,CUL7,GRIP1,CLSTN2,PLXNA4
2_Member	GO Biological Processes	GO:0050769	positive regulation of neurogenesis	-4.04818	-1.19003	9/474	655,1523,1627,2033,2889,5361,9820,23426,91584	BMP7,CUX1,DBN1,EP300,RAPGEF1,PLXNA1,CUL7,GRIP1,PLXNA4
2_Member	GO Biological Processes	GO:0000904	cell morphogenesis involved in differentiation	-3.86437	-1.07876	11/745	655,1523,1627,2033,5361,9820,10381,57520,80781,85451,91584	BMP7,CUX1,DBN1,EP300,PLXNA1,CUL7,TUBB3,HECW2,COL18A1,UNK,PLXNA4
2_Member	GO Biological Processes	GO:1900006	positive regulation of dendrite development	-3.71491	-0.976727	4/74	655,1523,1627,9820	BMP7,CUX1,DBN1,CUL7
2_Member	GO Biological Processes	GO:0045664	regulation of neuron differentiation	-3.66329	-0.939832	10/656	655,1523,1627,2033,2889,5361,9820,23426,57520,91584	BMP7,CUX1,DBN1,EP300,RAPGEF1,PLXNA1,CUL7,GRIP1,HECW2,PLXNA4
2_Member	GO Biological Processes	GO:0050773	regulation of dendrite development	-3.55205	-0.887009	5/149	655,1523,1627,9820,57520	BMP7,CUX1,DBN1,CUL7,HECW2
2_Member	GO Biological Processes	GO:0010720	positive regulation of cell development	-3.54852	-0.887009	9/553	655,1523,1627,2033,2889,5361,9820,23426,91584	BMP7,CUX1,DBN1,EP300,RAPGEF1,PLXNA1,CUL7,GRIP1,PLXNA4
2_Member	GO Biological Processes	GO:0016358	dendrite development	-3.54352	-0.887009	6/233	655,1523,1627,9820,23426,57520	BMP7,CUX1,DBN1,CUL7,GRIP1,HECW2
2_Member	GO Biological Processes	GO:0010770	positive regulation of cell morphogenesis involved in differentiation	-3.48596	-0.853588	5/154	1523,1627,5361,9820,91584	CUX1,DBN1,PLXNA1,CUL7,PLXNA4
2_Member	GO Biological Processes	GO:0120035	regulation of plasma membrane bounded cell projection organization	-3.44929	-0.84545	10/698	655,1523,1627,2033,2889,5361,9820,23426,57520,91584	BMP7,CUX1,DBN1,EP300,RAPGEF1,PLXNA1,CUL7,GRIP1,HECW2,PLXNA4
2_Member	GO Biological Processes	GO:0031344	regulation of cell projection organization	-3.40076	-0.812971	10/708	655,1523,1627,2033,2889,5361,9820,23426,57520,91584	BMP7,CUX1,DBN1,EP300,RAPGEF1,PLXNA1,CUL7,GRIP1,HECW2,PLXNA4
2_Member	GO Biological Processes	GO:0048667	cell morphogenesis involved in neuron differentiation	-3.38141	-0.8053	9/583	655,1523,1627,5361,9820,10381,57520,85451,91584	BMP7,CUX1,DBN1,PLXNA1,CUL7,TUBB3,HECW2,UNK,PLXNA4
2_Member	GO Biological Processes	GO:0048814	regulation of dendrite morphogenesis	-3.37054	-0.8053	4/91	1523,1627,9820,57520	CUX1,DBN1,CUL7,HECW2
2_Member	GO Biological Processes	GO:0050775	positive regulation of dendrite morphogenesis	-3.34039	-0.798839	3/39	1523,1627,9820	CUX1,DBN1,CUL7
2_Member	GO Biological Processes	GO:0048812	neuron projection morphogenesis	-3.05402	-0.593809	9/648	655,1523,1627,5361,9820,10381,23426,57520,91584	BMP7,CUX1,DBN1,PLXNA1,CUL7,TUBB3,GRIP1,HECW2,PLXNA4
2_Member	GO Biological Processes	GO:0120039	plasma membrane bounded cell projection morphogenesis	-2.98901	-0.566587	9/662	655,1523,1627,5361,9820,10381,23426,57520,91584	BMP7,CUX1,DBN1,PLXNA1,CUL7,TUBB3,GRIP1,HECW2,PLXNA4
2_Member	GO Biological Processes	GO:0048858	cell projection morphogenesis	-2.97077	-0.55552	9/666	655,1523,1627,5361,9820,10381,23426,57520,91584	BMP7,CUX1,DBN1,PLXNA1,CUL7,TUBB3,GRIP1,HECW2,PLXNA4
2_Member	GO Biological Processes	GO:0010769	regulation of cell morphogenesis involved in differentiation	-2.96035	-0.552169	6/301	1523,1627,5361,9820,57520,91584	CUX1,DBN1,PLXNA1,CUL7,HECW2,PLXNA4
2_Member	GO Biological Processes	GO:0032990	cell part morphogenesis	-2.88601	-0.504981	9/685	655,1523,1627,5361,9820,10381,23426,57520,91584	BMP7,CUX1,DBN1,PLXNA1,CUL7,TUBB3,GRIP1,HECW2,PLXNA4
2_Member	GO Biological Processes	GO:0048813	dendrite morphogenesis	-2.64069	-0.29137	4/143	1523,1627,9820,57520	CUX1,DBN1,CUL7,HECW2
2_Member	GO Biological Processes	GO:0022604	regulation of cell morphogenesis	-2.57284	-0.247326	7/484	1523,1627,5361,9820,23426,57520,91584	CUX1,DBN1,PLXNA1,CUL7,GRIP1,HECW2,PLXNA4
2_Member	GO Biological Processes	GO:0050772	positive regulation of axonogenesis	-2.36206	-0.105967	3/85	1627,5361,91584	DBN1,PLXNA1,PLXNA4
2_Member	GO Biological Processes	GO:0048589	developmental growth	-2.34842	-0.0972298	8/674	677,1627,2033,5361,5738,23236,80014,91584	ZFP36L1,DBN1,EP300,PLXNA1,PTGFRN,PLCB1,WWC2,PLXNA4
2_Member	GO Biological Processes	GO:0042330	taxis	-1.90365	0	7/647	655,2033,2321,5361,7057,10381,91584	BMP7,EP300,FLT1,PLXNA1,THBS1,TUBB3,PLXNA4
2_Member	GO Biological Processes	GO:0030155	regulation of cell adhesion	-1.75518	0	7/693	655,3714,5361,7057,8754,10272,91584	BMP7,JAG2,PLXNA1,THBS1,ADAM9,FSTL3,PLXNA4
2_Member	GO Biological Processes	GO:0007411	axon guidance	-1.65656	0	4/276	655,5361,10381,91584	BMP7,PLXNA1,TUBB3,PLXNA4
2_Member	GO Biological Processes	GO:0097485	neuron projection guidance	-1.65149	0	4/277	655,5361,10381,91584	BMP7,PLXNA1,TUBB3,PLXNA4
2_Member	GO Biological Processes	GO:1990138	neuron projection extension	-1.56556	0	3/168	1627,5361,91584	DBN1,PLXNA1,PLXNA4
2_Member	GO Biological Processes	GO:0008361	regulation of cell size	-1.48932	0	3/180	1627,9821,91584	DBN1,RB1CC1,PLXNA4
2_Member	GO Biological Processes	GO:0050770	regulation of axonogenesis	-1.4712	0	3/183	1627,5361,91584	DBN1,PLXNA1,PLXNA4
2_Member	GO Biological Processes	GO:0007409	axonogenesis	-1.45983	0	5/468	655,1627,5361,10381,91584	BMP7,DBN1,PLXNA1,TUBB3,PLXNA4
2_Member	GO Biological Processes	GO:0006935	chemotaxis	-1.41589	0	6/645	655,2321,5361,7057,10381,91584	BMP7,FLT1,PLXNA1,THBS1,TUBB3,PLXNA4
2_Member	GO Biological Processes	GO:0048638	regulation of developmental growth	-1.34505	0	4/347	1627,23236,80014,91584	DBN1,PLCB1,WWC2,PLXNA4
2_Member	GO Biological Processes	GO:0061564	axon development	-1.31411	0	5/514	655,1627,5361,10381,91584	BMP7,DBN1,PLXNA1,TUBB3,PLXNA4
3_Summary	GO Biological Processes	GO:0030521	androgen receptor signaling pathway	-5.41931	-1.99689	5/61	2033,2274,6047,23426,56937,655,677,7057,8754,858,23236,116151,116372,2889,55765	EP300,FHL2,RNF4,GRIP1,PMEPA1,BMP7,ZFP36L1,THBS1,ADAM9,CAV2,PLCB1,FAM210B,LYPD1,RAPGEF1,INAVA
3_Member	GO Biological Processes	GO:0030521	androgen receptor signaling pathway	-5.41931	-1.99689	5/61	2033,2274,6047,23426,56937	EP300,FHL2,RNF4,GRIP1,PMEPA1
3_Member	GO Biological Processes	GO:0048545	response to steroid hormone	-4.74748	-1.69303	9/385	655,677,2033,2274,6047,7057,8754,23426,56937	BMP7,ZFP36L1,EP300,FHL2,RNF4,THBS1,ADAM9,GRIP1,PMEPA1
3_Member	GO Biological Processes	GO:0071383	cellular response to steroid hormone stimulus	-4.28413	-1.33882	7/250	655,677,2033,2274,6047,23426,56937	BMP7,ZFP36L1,EP300,FHL2,RNF4,GRIP1,PMEPA1
3_Member	GO Biological Processes	GO:0043401	steroid hormone mediated signaling pathway	-4.10096	-1.2078	6/184	655,2033,2274,6047,23426,56937	BMP7,EP300,FHL2,RNF4,GRIP1,PMEPA1
3_Member	GO Biological Processes	GO:0032870	cellular response to hormone stimulus	-4.08616	-1.2078	11/703	655,677,858,2033,2274,6047,23236,23426,56937,116151,116372	BMP7,ZFP36L1,CAV2,EP300,FHL2,RNF4,PLCB1,GRIP1,PMEPA1,FAM210B,LYPD1
3_Member	GO Biological Processes	GO:0030518	intracellular steroid hormone receptor signaling pathway	-3.79667	-1.02745	5/132	2033,2274,6047,23426,56937	EP300,FHL2,RNF4,GRIP1,PMEPA1
3_Member	GO Biological Processes	GO:0071407	cellular response to organic cyclic compound	-3.61265	-0.90343	9/542	655,677,2033,2274,2889,6047,23426,56937,116151	BMP7,ZFP36L1,EP300,FHL2,RAPGEF1,RNF4,GRIP1,PMEPA1,FAM210B
3_Member	GO Biological Processes	GO:0009755	hormone-mediated signaling pathway	-3.52367	-0.879396	6/235	655,2033,2274,6047,23426,56937	BMP7,EP300,FHL2,RNF4,GRIP1,PMEPA1
3_Member	GO Biological Processes	GO:0071396	cellular response to lipid	-3.24002	-0.720686	9/610	655,677,2033,2274,6047,8754,23426,56937,116151	BMP7,ZFP36L1,EP300,FHL2,RNF4,ADAM9,GRIP1,PMEPA1,FAM210B
3_Member	GO Biological Processes	GO:0030522	intracellular receptor signaling pathway	-3.12253	-0.637953	6/280	2033,2274,6047,23426,55765,56937	EP300,FHL2,RNF4,GRIP1,INAVA,PMEPA1
4_Summary	GO Biological Processes	GO:0030201	heparan sulfate proteoglycan metabolic process	-4.90878	-1.75334	4/37	55959,64131,92370,266722,2590,23236	SULF2,XYLT1,PXYLP1,HS6ST3,GALNT2,PLCB1
4_Member	GO Biological Processes	GO:0030201	heparan sulfate proteoglycan metabolic process	-4.90878	-1.75334	4/37	55959,64131,92370,266722	SULF2,XYLT1,PXYLP1,HS6ST3
4_Member	GO Biological Processes	GO:0015012	heparan sulfate proteoglycan biosynthetic process	-3.59735	-0.901918	3/32	64131,92370,266722	XYLT1,PXYLP1,HS6ST3
4_Member	GO Biological Processes	GO:0006029	proteoglycan metabolic process	-3.31707	-0.788588	4/94	55959,64131,92370,266722	SULF2,XYLT1,PXYLP1,HS6ST3
4_Member	GO Biological Processes	GO:0030166	proteoglycan biosynthetic process	-2.61818	-0.27494	3/69	64131,92370,266722	XYLT1,PXYLP1,HS6ST3
4_Member	GO Biological Processes	GO:0009100	glycoprotein metabolic process	-2.23396	-0.0156587	6/422	2590,23236,55959,64131,92370,266722	GALNT2,PLCB1,SULF2,XYLT1,PXYLP1,HS6ST3
4_Member	GO Biological Processes	GO:0009101	glycoprotein biosynthetic process	-1.93726	0	5/351	2590,23236,64131,92370,266722	GALNT2,PLCB1,XYLT1,PXYLP1,HS6ST3
5_Summary	GO Biological Processes	GO:0040037	negative regulation of fibroblast growth factor receptor signaling pathway	-4.0932	-1.2078	3/22	7057,55959,387914,677,655,2033,9820,23236,55765	THBS1,SULF2,SHISA2,ZFP36L1,BMP7,EP300,CUL7,PLCB1,INAVA
5_Member	GO Biological Processes	GO:0040037	negative regulation of fibroblast growth factor receptor signaling pathway	-4.0932	-1.2078	3/22	7057,55959,387914	THBS1,SULF2,SHISA2
5_Member	GO Biological Processes	GO:0040036	regulation of fibroblast growth factor receptor signaling pathway	-3.44397	-0.84545	3/36	7057,55959,387914	THBS1,SULF2,SHISA2
5_Member	GO Biological Processes	GO:0044344	cellular response to fibroblast growth factor stimulus	-2.64069	-0.29137	4/143	677,7057,55959,387914	ZFP36L1,THBS1,SULF2,SHISA2
5_Member	GO Biological Processes	GO:0071774	response to fibroblast growth factor	-2.56566	-0.245894	4/150	677,7057,55959,387914	ZFP36L1,THBS1,SULF2,SHISA2
5_Member	GO Biological Processes	GO:0090100	positive regulation of transmembrane receptor protein serine/threonine kinase signaling pathway	-2.11912	0	3/104	655,2033,7057	BMP7,EP300,THBS1
5_Member	GO Biological Processes	GO:0008543	fibroblast growth factor receptor signaling pathway	-2.01034	0	3/114	7057,55959,387914	THBS1,SULF2,SHISA2
5_Member	GO Biological Processes	GO:0006986	response to unfolded protein	-1.51405	0	3/176	2033,7057,9820	EP300,THBS1,CUL7
5_Member	GO Biological Processes	GO:0001819	positive regulation of cytokine production	-1.47343	0	5/464	2033,7057,23236,55765,55959	EP300,THBS1,PLCB1,INAVA,SULF2
5_Member	GO Biological Processes	GO:0035966	response to topologically incorrect protein	-1.38026	0	3/199	2033,7057,9820	EP300,THBS1,CUL7
6_Summary	GO Biological Processes	GO:0051783	regulation of nuclear division	-4.02421	-1.18536	6/190	655,858,9820,10783,23236,57520,677,2033,6047,55787,23331,1289,23325,5738,10529	BMP7,CAV2,CUL7,NEK6,PLCB1,HECW2,ZFP36L1,EP300,RNF4,TXLNG,TTC28,COL5A1,WASHC4,PTGFRN,NEBL
6_Member	GO Biological Processes	GO:0051783	regulation of nuclear division	-4.02421	-1.18536	6/190	655,858,9820,10783,23236,57520	BMP7,CAV2,CUL7,NEK6,PLCB1,HECW2
6_Member	GO Biological Processes	GO:0007088	regulation of mitotic nuclear division	-3.33666	-0.798839	5/166	655,858,9820,10783,57520	BMP7,CAV2,CUL7,NEK6,HECW2
6_Member	GO Biological Processes	GO:0010564	regulation of cell cycle process	-3.03802	-0.585635	10/789	655,677,858,2033,6047,9820,10783,23236,55787,57520	BMP7,ZFP36L1,CAV2,EP300,RNF4,CUL7,NEK6,PLCB1,TXLNG,HECW2
6_Member	GO Biological Processes	GO:0007346	regulation of mitotic cell cycle	-2.9936	-0.566587	9/661	655,677,858,2033,9820,10783,23236,23331,57520	BMP7,ZFP36L1,CAV2,EP300,CUL7,NEK6,PLCB1,TTC28,HECW2
6_Member	GO Biological Processes	GO:0140014	mitotic nuclear division	-2.41945	-0.132689	5/268	655,858,9820,10783,57520	BMP7,CAV2,CUL7,NEK6,HECW2
6_Member	GO Biological Processes	GO:0000280	nuclear division	-2.28867	-0.0472635	6/411	655,858,9820,10783,23236,57520	BMP7,CAV2,CUL7,NEK6,PLCB1,HECW2
6_Member	GO Biological Processes	GO:0048285	organelle fission	-2.08911	0	6/453	655,858,9820,10783,23236,57520	BMP7,CAV2,CUL7,NEK6,PLCB1,HECW2
6_Member	GO Biological Processes	GO:0010256	endomembrane system organization	-1.54756	0	5/443	858,1289,9820,10783,23325	CAV2,COL5A1,CUL7,NEK6,WASHC4
6_Member	GO Biological Processes	GO:1901990	regulation of mitotic cell cycle phase transition	-1.54393	0	5/444	677,2033,10783,23236,57520	ZFP36L1,EP300,NEK6,PLCB1,HECW2
6_Member	GO Biological Processes	GO:0043902	positive regulation of multi-organism process	-1.44178	0	3/188	858,2033,23236	CAV2,EP300,PLCB1
6_Member	GO Biological Processes	GO:1901987	regulation of cell cycle phase transition	-1.41996	0	5/480	677,2033,10783,23236,57520	ZFP36L1,EP300,NEK6,PLCB1,HECW2
6_Member	GO Biological Processes	GO:0061061	muscle structure development	-1.33863	0	6/674	677,858,2033,5738,10529,23236	ZFP36L1,CAV2,EP300,PTGFRN,NEBL,PLCB1
7_Summary	GO Biological Processes	GO:0009792	embryo development ending in birth or egg hatching	-3.71682	-0.976727	10/646	655,677,1627,2033,3714,4071,55959,56977,64131,85451,1289,4052,9645,9821,10529,2321	BMP7,ZFP36L1,DBN1,EP300,JAG2,TM4SF1,SULF2,STOX2,XYLT1,UNK,COL5A1,LTBP1,MICAL2,RB1CC1,NEBL,FLT1
7_Member	GO Biological Processes	GO:0009792	embryo development ending in birth or egg hatching	-3.71682	-0.976727	10/646	655,677,1627,2033,3714,4071,55959,56977,64131,85451	BMP7,ZFP36L1,DBN1,EP300,JAG2,TM4SF1,SULF2,STOX2,XYLT1,UNK
7_Member	GO Biological Processes	GO:0043009	chordate embryonic development	-3.14522	-0.652211	9/629	655,677,1627,2033,3714,4071,55959,64131,85451	BMP7,ZFP36L1,DBN1,EP300,JAG2,TM4SF1,SULF2,XYLT1,UNK
7_Member	GO Biological Processes	GO:0007507	heart development	-2.7091	-0.34103	8/588	655,677,1289,2033,4052,9645,9821,10529	BMP7,ZFP36L1,COL5A1,EP300,LTBP1,MICAL2,RB1CC1,NEBL
7_Member	GO Biological Processes	GO:0001701	in utero embryonic development	-2.48143	-0.172946	6/375	655,677,1627,3714,4071,85451	BMP7,ZFP36L1,DBN1,JAG2,TM4SF1,UNK
7_Member	GO Biological Processes	GO:0008593	regulation of Notch signaling pathway	-2.10773	0	3/105	655,2033,3714	BMP7,EP300,JAG2
7_Member	GO Biological Processes	GO:0048598	embryonic morphogenesis	-1.58981	0	6/586	655,677,1289,2321,3714,9645	BMP7,ZFP36L1,COL5A1,FLT1,JAG2,MICAL2
7_Member	GO Biological Processes	GO:0007219	Notch signaling pathway	-1.41329	0	3/193	655,2033,3714	BMP7,EP300,JAG2
7_Member	GO Biological Processes	GO:0071456	cellular response to hypoxia	-1.33805	0	3/207	655,677,2033	BMP7,ZFP36L1,EP300
7_Member	GO Biological Processes	GO:0001501	skeletal system development	-1.3023	0	5/518	655,2033,3714,55959,64131	BMP7,EP300,JAG2,SULF2,XYLT1
8_Summary	GO Biological Processes	GO:0043405	regulation of MAP kinase activity	-3.45325	-0.84545	7/341	655,1846,2321,2889,7057,8754,55765,858,9821,23236,5796,144100,2274,80014,677	BMP7,DUSP4,FLT1,RAPGEF1,THBS1,ADAM9,INAVA,CAV2,RB1CC1,PLCB1,PTPRK,PLEKHA7,FHL2,WWC2,ZFP36L1
8_Member	GO Biological Processes	GO:0043405	regulation of MAP kinase activity	-3.45325	-0.84545	7/341	655,1846,2321,2889,7057,8754,55765	BMP7,DUSP4,FLT1,RAPGEF1,THBS1,ADAM9,INAVA
8_Member	GO Biological Processes	GO:0043408	regulation of MAPK cascade	-3.1014	-0.625096	10/774	655,858,1846,2321,2889,7057,8754,9821,23236,55765	BMP7,CAV2,DUSP4,FLT1,RAPGEF1,THBS1,ADAM9,RB1CC1,PLCB1,INAVA
8_Member	GO Biological Processes	GO:0043410	positive regulation of MAPK cascade	-2.90126	-0.513595	8/548	858,2321,2889,7057,8754,9821,23236,55765	CAV2,FLT1,RAPGEF1,THBS1,ADAM9,RB1CC1,PLCB1,INAVA
8_Member	GO Biological Processes	GO:0034332	adherens junction organization	-2.65174	-0.29137	4/142	5796,7057,55765,144100	PTPRK,THBS1,INAVA,PLEKHA7
8_Member	GO Biological Processes	GO:0043406	positive regulation of MAP kinase activity	-2.47536	-0.172414	5/260	2321,2889,7057,8754,55765	FLT1,RAPGEF1,THBS1,ADAM9,INAVA
8_Member	GO Biological Processes	GO:0071900	regulation of protein serine/threonine kinase activity	-2.40622	-0.130003	7/519	655,1846,2321,2889,7057,8754,55765	BMP7,DUSP4,FLT1,RAPGEF1,THBS1,ADAM9,INAVA
8_Member	GO Biological Processes	GO:0034330	cell junction organization	-2.26923	-0.0433047	5/291	2889,5796,7057,55765,144100	RAPGEF1,PTPRK,THBS1,INAVA,PLEKHA7
8_Member	GO Biological Processes	GO:0071902	positive regulation of protein serine/threonine kinase activity	-2.01327	0	5/336	2321,2889,7057,8754,55765	FLT1,RAPGEF1,THBS1,ADAM9,INAVA
8_Member	GO Biological Processes	GO:1902532	negative regulation of intracellular signal transduction	-1.65119	0	6/567	655,1846,2274,2889,7057,80014	BMP7,DUSP4,FHL2,RAPGEF1,THBS1,WWC2
8_Member	GO Biological Processes	GO:0045859	regulation of protein kinase activity	-1.46894	0	7/796	655,1846,2321,2889,7057,8754,55765	BMP7,DUSP4,FLT1,RAPGEF1,THBS1,ADAM9,INAVA
8_Member	GO Biological Processes	GO:0043409	negative regulation of MAPK cascade	-1.46524	0	3/184	655,1846,2889	BMP7,DUSP4,RAPGEF1
8_Member	GO Biological Processes	GO:0070371	ERK1 and ERK2 cascade	-1.44459	0	4/322	677,1846,2321,2889	ZFP36L1,DUSP4,FLT1,RAPGEF1
8_Member	GO Biological Processes	GO:0032147	activation of protein kinase activity	-1.39959	0	4/333	2889,7057,8754,55765	RAPGEF1,THBS1,ADAM9,INAVA
9_Summary	GO Biological Processes	GO:0045637	regulation of myeloid cell differentiation	-3.36242	-0.8053	6/252	677,2033,7057,10272,51621,116151,2739,286410,3714,57181,23236	ZFP36L1,EP300,THBS1,FSTL3,KLF13,FAM210B,GLO1,ATP11C,JAG2,SLC39A10,PLCB1
9_Member	GO Biological Processes	GO:0045637	regulation of myeloid cell differentiation	-3.36242	-0.8053	6/252	677,2033,7057,10272,51621,116151	ZFP36L1,EP300,THBS1,FSTL3,KLF13,FAM210B
9_Member	GO Biological Processes	GO:0045646	regulation of erythrocyte differentiation	-3.07422	-0.606034	3/48	677,51621,116151	ZFP36L1,KLF13,FAM210B
9_Member	GO Biological Processes	GO:0030099	myeloid cell differentiation	-2.93291	-0.531676	7/418	677,2033,2739,7057,10272,51621,116151	ZFP36L1,EP300,GLO1,THBS1,FSTL3,KLF13,FAM210B
9_Member	GO Biological Processes	GO:1903706	regulation of hemopoiesis	-2.60802	-0.270766	7/477	677,2033,7057,10272,51621,116151,286410	ZFP36L1,EP300,THBS1,FSTL3,KLF13,FAM210B,ATP11C
9_Member	GO Biological Processes	GO:0045638	negative regulation of myeloid cell differentiation	-2.27936	-0.0472635	3/91	677,10272,51621	ZFP36L1,FSTL3,KLF13
9_Member	GO Biological Processes	GO:0030218	erythrocyte differentiation	-2.00005	0	3/115	677,51621,116151	ZFP36L1,KLF13,FAM210B
9_Member	GO Biological Processes	GO:0034101	erythrocyte homeostasis	-1.92123	0	3/123	677,51621,116151	ZFP36L1,KLF13,FAM210B
9_Member	GO Biological Processes	GO:0030183	B cell differentiation	-1.848	0	3/131	677,2033,286410	ZFP36L1,EP300,ATP11C
9_Member	GO Biological Processes	GO:0002521	leukocyte differentiation	-1.831	0	6/516	677,2033,2739,3714,10272,286410	ZFP36L1,EP300,GLO1,JAG2,FSTL3,ATP11C
9_Member	GO Biological Processes	GO:0002262	myeloid cell homeostasis	-1.70807	0	3/148	677,51621,116151	ZFP36L1,KLF13,FAM210B
9_Member	GO Biological Processes	GO:1903707	negative regulation of hemopoiesis	-1.65576	0	3/155	677,10272,51621	ZFP36L1,FSTL3,KLF13
9_Member	GO Biological Processes	GO:0042113	B cell activation	-1.496	0	4/310	677,2033,57181,286410	ZFP36L1,EP300,SLC39A10,ATP11C
9_Member	GO Biological Processes	GO:0002683	negative regulation of immune system process	-1.47686	0	5/463	677,7057,10272,23236,51621	ZFP36L1,THBS1,FSTL3,PLCB1,KLF13
9_Member	GO Biological Processes	GO:0050864	regulation of B cell activation	-1.46524	0	3/184	677,57181,286410	ZFP36L1,SLC39A10,ATP11C
9_Member	GO Biological Processes	GO:1903708	positive regulation of hemopoiesis	-1.44178	0	3/188	677,116151,286410	ZFP36L1,FAM210B,ATP11C
9_Member	GO Biological Processes	GO:0002573	myeloid leukocyte differentiation	-1.34841	0	3/205	677,2739,10272	ZFP36L1,GLO1,FSTL3
9_Member	GO Biological Processes	GO:0030098	lymphocyte differentiation	-1.32255	0	4/353	677,2033,3714,286410	ZFP36L1,EP300,JAG2,ATP11C
10_Summary	GO Biological Processes	GO:0001568	blood vessel development	-3.15328	-0.652211	10/762	655,677,1289,2321,2889,4052,7057,9820,80155,80781,858,4601,5796,26136,51621,3714,55959,23236,387914,8754	BMP7,ZFP36L1,COL5A1,FLT1,RAPGEF1,LTBP1,THBS1,CUL7,NAA15,COL18A1,CAV2,MXI1,PTPRK,TES,KLF13,JAG2,SULF2,PLCB1,SHISA2,ADAM9
10_Member	GO Biological Processes	GO:0001568	blood vessel development	-3.15328	-0.652211	10/762	655,677,1289,2321,2889,4052,7057,9820,80155,80781	BMP7,ZFP36L1,COL5A1,FLT1,RAPGEF1,LTBP1,THBS1,CUL7,NAA15,COL18A1
10_Member	GO Biological Processes	GO:0008285	negative regulation of cell proliferation	-3.15328	-0.652211	10/762	655,858,2321,2889,4601,5796,7057,26136,51621,80781	BMP7,CAV2,FLT1,RAPGEF1,MXI1,PTPRK,THBS1,TES,KLF13,COL18A1
10_Member	GO Biological Processes	GO:0001944	vasculature development	-3.0214	-0.576693	10/793	655,677,1289,2321,2889,4052,7057,9820,80155,80781	BMP7,ZFP36L1,COL5A1,FLT1,RAPGEF1,LTBP1,THBS1,CUL7,NAA15,COL18A1
10_Member	GO Biological Processes	GO:1904019	epithelial cell apoptotic process	-3.00239	-0.566587	4/114	677,3714,7057,80781	ZFP36L1,JAG2,THBS1,COL18A1
10_Member	GO Biological Processes	GO:0001937	negative regulation of endothelial cell proliferation	-2.46704	-0.169549	3/78	858,2321,7057	CAV2,FLT1,THBS1
10_Member	GO Biological Processes	GO:0050678	regulation of epithelial cell proliferation	-2.40925	-0.130003	6/388	677,858,2321,5796,7057,55959	ZFP36L1,CAV2,FLT1,PTPRK,THBS1,SULF2
10_Member	GO Biological Processes	GO:0050680	negative regulation of epithelial cell proliferation	-2.39884	-0.130003	4/167	858,2321,5796,7057	CAV2,FLT1,PTPRK,THBS1
10_Member	GO Biological Processes	GO:0071674	mononuclear cell migration	-2.27936	-0.0472635	3/91	2321,7057,23236	FLT1,THBS1,PLCB1
10_Member	GO Biological Processes	GO:1904035	regulation of epithelial cell apoptotic process	-2.26616	-0.0433047	3/92	677,7057,80781	ZFP36L1,THBS1,COL18A1
10_Member	GO Biological Processes	GO:0050673	epithelial cell proliferation	-2.12068	0	6/446	677,858,2321,5796,7057,55959	ZFP36L1,CAV2,FLT1,PTPRK,THBS1,SULF2
10_Member	GO Biological Processes	GO:0007169	transmembrane receptor protein tyrosine kinase signaling pathway	-1.66858	0	7/722	858,2321,2889,7057,23236,55959,387914	CAV2,FLT1,RAPGEF1,THBS1,PLCB1,SULF2,SHISA2
10_Member	GO Biological Processes	GO:0040017	positive regulation of locomotion	-1.55247	0	6/598	655,858,2321,7057,8754,80781	BMP7,CAV2,FLT1,THBS1,ADAM9,COL18A1
10_Member	GO Biological Processes	GO:0048015	phosphatidylinositol-mediated signaling	-1.48324	0	3/181	677,2321,23236	ZFP36L1,FLT1,PLCB1
10_Member	GO Biological Processes	GO:0001936	regulation of endothelial cell proliferation	-1.4712	0	3/183	858,2321,7057	CAV2,FLT1,THBS1
10_Member	GO Biological Processes	GO:0048017	inositol lipid-mediated signaling	-1.46524	0	3/184	677,2321,23236	ZFP36L1,FLT1,PLCB1
10_Member	GO Biological Processes	GO:0001935	endothelial cell proliferation	-1.38026	0	3/199	858,2321,7057	CAV2,FLT1,THBS1
10_Member	GO Biological Processes	GO:0048514	blood vessel morphogenesis	-1.31818	0	6/682	677,2321,7057,9820,80155,80781	ZFP36L1,FLT1,THBS1,CUL7,NAA15,COL18A1
10_Member	GO Biological Processes	GO:0097529	myeloid leukocyte migration	-1.31267	0	3/212	2321,7057,23236	FLT1,THBS1,PLCB1
11_Summary	GO Biological Processes	GO:0097120	receptor localization to synapse	-2.90173	-0.513595	3/55	1627,23426,27092,23236,116372,25897,64084	DBN1,GRIP1,CACNG4,PLCB1,LYPD1,RNF19A,CLSTN2
11_Member	GO Biological Processes	GO:0097120	receptor localization to synapse	-2.90173	-0.513595	3/55	1627,23426,27092	DBN1,GRIP1,CACNG4
11_Member	GO Biological Processes	GO:0060359	response to ammonium ion	-1.81327	0	3/135	23236,27092,116372	PLCB1,CACNG4,LYPD1
11_Member	GO Biological Processes	GO:0051668	localization within membrane	-1.70807	0	3/148	1627,23426,27092	DBN1,GRIP1,CACNG4
11_Member	GO Biological Processes	GO:0050804	modulation of chemical synaptic transmission	-1.57333	0	5/436	1627,23236,25897,27092,64084	DBN1,PLCB1,RNF19A,CACNG4,CLSTN2
11_Member	GO Biological Processes	GO:0099177	regulation of trans-synaptic signaling	-1.56962	0	5/437	1627,23236,25897,27092,64084	DBN1,PLCB1,RNF19A,CACNG4,CLSTN2
12_Summary	GO Biological Processes	GO:0043087	regulation of GTPase activity	-2.5979	-0.266557	7/479	858,2889,5361,9462,23236,25894,91584,2321,57181	CAV2,RAPGEF1,PLXNA1,RASAL2,PLCB1,PLEKHG4,PLXNA4,FLT1,SLC39A10
12_Member	GO Biological Processes	GO:0043087	regulation of GTPase activity	-2.5979	-0.266557	7/479	858,2889,5361,9462,23236,25894,91584	CAV2,RAPGEF1,PLXNA1,RASAL2,PLCB1,PLEKHG4,PLXNA4
12_Member	GO Biological Processes	GO:0043547	positive regulation of GTPase activity	-1.69445	0	5/405	858,2889,9462,23236,25894	CAV2,RAPGEF1,RASAL2,PLCB1,PLEKHG4
12_Member	GO Biological Processes	GO:0051345	positive regulation of hydrolase activity	-1.5332	0	7/771	858,2321,2889,9462,23236,25894,57181	CAV2,FLT1,RAPGEF1,RASAL2,PLCB1,PLEKHG4,SLC39A10
13_Summary	GO Biological Processes	GO:0001890	placenta development	-2.5347	-0.220616	4/153	655,677,9820,56977,64839,10272,27125	BMP7,ZFP36L1,CUL7,STOX2,FBXL17,FSTL3,AFF4
13_Member	GO Biological Processes	GO:0001890	placenta development	-2.5347	-0.220616	4/153	655,677,9820,56977	BMP7,ZFP36L1,CUL7,STOX2
13_Member	GO Biological Processes	GO:0060485	mesenchyme development	-1.64142	0	4/279	655,677,9820,64839	BMP7,ZFP36L1,CUL7,FBXL17
13_Member	GO Biological Processes	GO:0048608	reproductive structure development	-1.58831	0	5/432	655,677,9820,10272,56977	BMP7,ZFP36L1,CUL7,FSTL3,STOX2
13_Member	GO Biological Processes	GO:0061458	reproductive system development	-1.57706	0	5/435	655,677,9820,10272,56977	BMP7,ZFP36L1,CUL7,FSTL3,STOX2
13_Member	GO Biological Processes	GO:0003006	developmental process involved in reproduction	-1.33092	0	6/677	655,677,9820,10272,27125,56977	BMP7,ZFP36L1,CUL7,FSTL3,AFF4,STOX2
14_Summary	GO Biological Processes	GO:0034644	cellular response to UV	-2.39106	-0.130003	3/83	2033,5796,10715,677	EP300,PTPRK,CERS1,ZFP36L1
14_Member	GO Biological Processes	GO:0034644	cellular response to UV	-2.39106	-0.130003	3/83	2033,5796,10715	EP300,PTPRK,CERS1
14_Member	GO Biological Processes	GO:0071482	cellular response to light stimulus	-1.85687	0	3/130	2033,5796,10715	EP300,PTPRK,CERS1
14_Member	GO Biological Processes	GO:0009411	response to UV	-1.75525	0	3/142	2033,5796,10715	EP300,PTPRK,CERS1
14_Member	GO Biological Processes	GO:0071478	cellular response to radiation	-1.41892	0	3/192	2033,5796,10715	EP300,PTPRK,CERS1
14_Member	GO Biological Processes	GO:0071214	cellular response to abiotic stimulus	-1.39959	0	4/333	677,2033,5796,10715	ZFP36L1,EP300,PTPRK,CERS1
14_Member	GO Biological Processes	GO:0104004	cellular response to environmental stimulus	-1.39959	0	4/333	677,2033,5796,10715	ZFP36L1,EP300,PTPRK,CERS1
15_Summary	GO Biological Processes	GO:0051403	stress-activated MAPK cascade	-2.288	-0.0472635	5/288	677,2889,9821,23236,55765,655,2033,10783	ZFP36L1,RAPGEF1,RB1CC1,PLCB1,INAVA,BMP7,EP300,NEK6
15_Member	GO Biological Processes	GO:0051403	stress-activated MAPK cascade	-2.288	-0.0472635	5/288	677,2889,9821,23236,55765	ZFP36L1,RAPGEF1,RB1CC1,PLCB1,INAVA
15_Member	GO Biological Processes	GO:0031098	stress-activated protein kinase signaling cascade	-2.11587	0	5/317	677,2889,9821,23236,55765	ZFP36L1,RAPGEF1,RB1CC1,PLCB1,INAVA
15_Member	GO Biological Processes	GO:0032872	regulation of stress-activated MAPK cascade	-1.85581	0	4/240	2889,9821,23236,55765	RAPGEF1,RB1CC1,PLCB1,INAVA
15_Member	GO Biological Processes	GO:0070302	regulation of stress-activated protein kinase signaling cascade	-1.84381	0	4/242	2889,9821,23236,55765	RAPGEF1,RB1CC1,PLCB1,INAVA
15_Member	GO Biological Processes	GO:0080135	regulation of cellular response to stress	-1.59237	0	7/749	655,2033,2889,9821,10783,23236,55765	BMP7,EP300,RAPGEF1,RB1CC1,NEK6,PLCB1,INAVA
15_Member	GO Biological Processes	GO:0032874	positive regulation of stress-activated MAPK cascade	-1.53945	0	3/172	9821,23236,55765	RB1CC1,PLCB1,INAVA
15_Member	GO Biological Processes	GO:0070304	positive regulation of stress-activated protein kinase signaling cascade	-1.53303	0	3/173	9821,23236,55765	RB1CC1,PLCB1,INAVA
15_Member	GO Biological Processes	GO:0046328	regulation of JNK cascade	-1.45344	0	3/186	2889,9821,23236	RAPGEF1,RB1CC1,PLCB1
16_Summary	GO Biological Processes	GO:0045185	maintenance of protein location	-2.10773	0	3/105	1627,4052,4601,23236	DBN1,LTBP1,MXI1,PLCB1
16_Member	GO Biological Processes	GO:0045185	maintenance of protein location	-2.10773	0	3/105	1627,4052,4601	DBN1,LTBP1,MXI1
16_Member	GO Biological Processes	GO:0051235	maintenance of location	-1.41167	0	4/330	1627,4052,4601,23236	DBN1,LTBP1,MXI1,PLCB1
17_Summary	GO Biological Processes	GO:0006511	ubiquitin-dependent protein catabolic process	-1.98709	0	7/623	6047,9736,9820,25897,57484,57520,64839,10381,10783,344148	RNF4,USP34,CUL7,RNF19A,RNF150,HECW2,FBXL17,TUBB3,NEK6,NCKAP5
17_Member	GO Biological Processes	GO:0006511	ubiquitin-dependent protein catabolic process	-1.98709	0	7/623	6047,9736,9820,25897,57484,57520,64839	RNF4,USP34,CUL7,RNF19A,RNF150,HECW2,FBXL17
17_Member	GO Biological Processes	GO:0019941	modification-dependent protein catabolic process	-1.96582	0	7/629	6047,9736,9820,25897,57484,57520,64839	RNF4,USP34,CUL7,RNF19A,RNF150,HECW2,FBXL17
17_Member	GO Biological Processes	GO:0043632	modification-dependent macromolecule catabolic process	-1.92754	0	7/640	6047,9736,9820,25897,57484,57520,64839	RNF4,USP34,CUL7,RNF19A,RNF150,HECW2,FBXL17
17_Member	GO Biological Processes	GO:0051603	proteolysis involved in cellular protein catabolic process	-1.68023	0	7/718	6047,9736,9820,25897,57484,57520,64839	RNF4,USP34,CUL7,RNF19A,RNF150,HECW2,FBXL17
17_Member	GO Biological Processes	GO:0000226	microtubule cytoskeleton organization	-1.66114	0	6/564	6047,9820,10381,10783,25897,344148	RNF4,CUL7,TUBB3,NEK6,RNF19A,NCKAP5
17_Member	GO Biological Processes	GO:0044257	cellular protein catabolic process	-1.52795	0	7/773	6047,9736,9820,25897,57484,57520,64839	RNF4,USP34,CUL7,RNF19A,RNF150,HECW2,FBXL17
17_Member	GO Biological Processes	GO:0000209	protein polyubiquitination	-1.496	0	4/310	6047,25897,57520,64839	RNF4,RNF19A,HECW2,FBXL17
18_Summary	GO Biological Processes	GO:0022612	gland morphogenesis	-1.94038	0	3/121	655,5361,55959,64131,1289,23236,7057,80781,9821,10272	BMP7,PLXNA1,SULF2,XYLT1,COL5A1,PLCB1,THBS1,COL18A1,RB1CC1,FSTL3
18_Member	GO Biological Processes	GO:0022612	gland morphogenesis	-1.94038	0	3/121	655,5361,55959	BMP7,PLXNA1,SULF2
18_Member	GO Biological Processes	GO:0048706	embryonic skeletal system development	-1.89315	0	3/126	655,55959,64131	BMP7,SULF2,XYLT1
18_Member	GO Biological Processes	GO:0045995	regulation of embryonic development	-1.83921	0	3/132	655,1289,23236	BMP7,COL5A1,PLCB1
18_Member	GO Biological Processes	GO:0043062	extracellular structure organization	-1.61497	0	5/425	655,1289,7057,55959,80781	BMP7,COL5A1,THBS1,SULF2,COL18A1
18_Member	GO Biological Processes	GO:0048732	gland development	-1.57706	0	5/435	655,5361,9821,10272,55959	BMP7,PLXNA1,RB1CC1,FSTL3,SULF2
19_Summary	GO Biological Processes	GO:0000302	response to reactive oxygen species	-1.8988	0	4/233	655,5796,8754,375748	BMP7,PTPRK,ADAM9,ERCC6L2
19_Member	GO Biological Processes	GO:0000302	response to reactive oxygen species	-1.8988	0	4/233	655,5796,8754,375748	BMP7,PTPRK,ADAM9,ERCC6L2
19_Member	GO Biological Processes	GO:0034614	cellular response to reactive oxygen species	-1.56556	0	3/168	655,5796,375748	BMP7,PTPRK,ERCC6L2
20_Summary	GO Biological Processes	GO:0018210	peptidyl-threonine modification	-1.82184	0	3/134	655,2590,388228	BMP7,GALNT2,SBK1
20_Member	GO Biological Processes	GO:0018210	peptidyl-threonine modification	-1.82184	0	3/134	655,2590,388228	BMP7,GALNT2,SBK1

## Sheet: Annotation_up_LNA
Input ID	Gene ID	Type	Tax ID	Homologene Gene ID	Homologene Gene Tax ID	GO:0016126 sterol biosynthetic process	GO:0033489 cholesterol biosynthetic proce	GO:0006720 isoprenoid metabolic process	GO:0033865 nucleoside bisphosphate metabo	GO:0019221 cytokine-mediated signaling pa	GO:0042180 cellular ketone metabolic proc	GO:0016054 organic acid catabolic process	GO:0051882 mitochondrial depolarization	GO:0046596 regulation of viral entry into	GO:0097190 apoptotic signaling pathway	GO:1901616 organic hydroxy compound catab	GO:0002683 negative regulation of immune	GO:0034308 primary alcohol metabolic proc	GO:0008643 carbohydrate transport	GO:0009615 response to virus	GO:0002253 activation of immune response	GO:0001954 positive regulation of cell-ma	GO:0015748 organophosphate ester transpor	GO:0042752 regulation of circadian rhythm	GO:0010035 response to inorganic substanc
GBF1	8729	symbol	H. sapiens	8729	H. sapiens	0.0	0.0	0.0	0.0	0.0	0.0	0.0	0.0	0.0	0.0	0.0	0.0	0.0	0.0	1.0	0.0	0.0	0.0	0.0	0.0
ATP6V0D1	9114	symbol	H. sapiens	9114	H. sapiens	0.0	0.0	0.0	0.0	0.0	0.0	0.0	0.0	0.0	0.0	0.0	0.0	0.0	0.0	0.0	0.0	0.0	0.0	0.0	0.0
ATPIF1	93974	gene_synonym	H. sapiens	93974	H. sapiens	1.0	0.0	0.0	1.0	0.0	0.0	0.0	1.0	0.0	1.0	0.0	1.0	0.0	0.0	0.0	0.0	0.0	0.0	0.0	0.0
ELF1	1997	symbol	H. sapiens	1997	H. sapiens	0.0	0.0	0.0	0.0	1.0	0.0	0.0	0.0	0.0	0.0	0.0	1.0	0.0	0.0	0.0	1.0	0.0	0.0	0.0	0.0
BAG3	9531	symbol	H. sapiens	9531	H. sapiens	0.0	0.0	0.0	0.0	0.0	0.0	0.0	0.0	0.0	1.0	0.0	0.0	0.0	0.0	0.0	1.0	0.0	0.0	0.0	0.0
KRT19	3880	symbol	H. sapiens	3880	H. sapiens	0.0	0.0	0.0	0.0	0.0	0.0	0.0	0.0	0.0	0.0	0.0	0.0	0.0	0.0	0.0	0.0	0.0	0.0	0.0	0.0
SQLE	6713	symbol	H. sapiens	6713	H. sapiens	1.0	0.0	0.0	0.0	0.0	0.0	0.0	0.0	0.0	0.0	0.0	0.0	0.0	0.0	0.0	0.0	0.0	0.0	0.0	0.0
COPB2	9276	symbol	H. sapiens	9276	H. sapiens	0.0	0.0	0.0	0.0	0.0	0.0	0.0	0.0	0.0	0.0	0.0	0.0	0.0	0.0	0.0	0.0	0.0	0.0	0.0	0.0
SDC4	6385	symbol	H. sapiens	6385	H. sapiens	0.0	0.0	1.0	0.0	0.0	0.0	0.0	0.0	0.0	0.0	0.0	1.0	0.0	0.0	0.0	0.0	1.0	0.0	0.0	0.0
TMEM205	374882	symbol	H. sapiens	374882	H. sapiens	0.0	0.0	0.0	0.0	0.0	0.0	0.0	0.0	0.0	0.0	0.0	0.0	0.0	0.0	0.0	0.0	0.0	0.0	0.0	0.0
LLGL2	3993	symbol	H. sapiens	3993	H. sapiens	0.0	0.0	0.0	0.0	0.0	0.0	0.0	0.0	0.0	0.0	0.0	0.0	0.0	0.0	0.0	0.0	0.0	0.0	0.0	0.0
DCAF6	55827	symbol	H. sapiens	55827	H. sapiens	0.0	0.0	0.0	0.0	0.0	0.0	0.0	0.0	0.0	0.0	0.0	0.0	0.0	0.0	0.0	0.0	0.0	0.0	0.0	0.0
TRAFD1	10906	symbol	H. sapiens	10906	H. sapiens	0.0	0.0	0.0	0.0	0.0	0.0	0.0	0.0	0.0	0.0	0.0	1.0	0.0	0.0	0.0	1.0	0.0	0.0	0.0	0.0
CSRP1	1465	symbol	H. sapiens	1465	H. sapiens	0.0	0.0	0.0	0.0	0.0	0.0	0.0	0.0	0.0	0.0	0.0	0.0	0.0	0.0	0.0	0.0	0.0	0.0	0.0	0.0
ANXA9	8416	symbol	H. sapiens	8416	H. sapiens	0.0	0.0	0.0	0.0	0.0	0.0	0.0	0.0	0.0	0.0	0.0	0.0	0.0	0.0	0.0	0.0	0.0	0.0	0.0	0.0
TRIM26	7726	symbol	H. sapiens	7726	H. sapiens	0.0	0.0	0.0	0.0	1.0	0.0	0.0	0.0	1.0	0.0	0.0	0.0	0.0	0.0	0.0	0.0	0.0	0.0	0.0	0.0
ACP2	53	symbol	H. sapiens	53	H. sapiens	0.0	0.0	0.0	0.0	0.0	0.0	0.0	0.0	0.0	0.0	0.0	0.0	0.0	0.0	0.0	0.0	0.0	0.0	0.0	0.0
NCDN	23154	symbol	H. sapiens	23154	H. sapiens	0.0	0.0	0.0	0.0	0.0	0.0	0.0	0.0	0.0	0.0	0.0	0.0	0.0	0.0	0.0	0.0	0.0	0.0	0.0	0.0
CDC42SE1	56882	symbol	H. sapiens	56882	H. sapiens	0.0	0.0	0.0	0.0	0.0	0.0	0.0	0.0	0.0	0.0	0.0	0.0	0.0	0.0	0.0	0.0	0.0	0.0	0.0	0.0
PPIC	5480	symbol	H. sapiens	5480	H. sapiens	0.0	0.0	0.0	0.0	0.0	0.0	0.0	0.0	0.0	0.0	0.0	0.0	0.0	0.0	0.0	0.0	0.0	0.0	0.0	0.0
TSKU	25987	symbol	H. sapiens	25987	H. sapiens	0.0	0.0	0.0	0.0	0.0	0.0	0.0	0.0	0.0	0.0	0.0	0.0	0.0	0.0	0.0	0.0	0.0	0.0	0.0	0.0
SOD2	6648	symbol	H. sapiens	6648	H. sapiens	0.0	0.0	0.0	0.0	1.0	0.0	0.0	1.0	0.0	1.0	0.0	1.0	1.0	0.0	0.0	0.0	0.0	0.0	0.0	1.0
HMGCR	3156	symbol	H. sapiens	3156	H. sapiens	1.0	0.0	1.0	1.0	0.0	1.0	0.0	1.0	0.0	0.0	1.0	0.0	1.0	0.0	0.0	0.0	0.0	0.0	0.0	0.0
PSME2	5721	symbol	H. sapiens	5721	H. sapiens	1.0	0.0	0.0	0.0	1.0	1.0	0.0	0.0	0.0	0.0	1.0	0.0	0.0	0.0	0.0	1.0	0.0	0.0	0.0	0.0
SLC37A1	54020	symbol	H. sapiens	54020	H. sapiens	0.0	0.0	0.0	0.0	0.0	0.0	1.0	0.0	0.0	0.0	0.0	0.0	0.0	1.0	0.0	0.0	0.0	1.0	0.0	0.0
PISD	23761	symbol	H. sapiens	23761	H. sapiens	1.0	0.0	0.0	1.0	0.0	0.0	0.0	0.0	0.0	0.0	0.0	0.0	0.0	0.0	0.0	0.0	0.0	0.0	0.0	0.0
GUCD1	83606	symbol	H. sapiens	83606	H. sapiens	0.0	0.0	0.0	0.0	0.0	0.0	0.0	0.0	0.0	0.0	0.0	0.0	0.0	0.0	0.0	0.0	0.0	0.0	0.0	0.0
SULT2B1	6820	symbol	H. sapiens	6820	H. sapiens	1.0	0.0	0.0	1.0	0.0	0.0	0.0	0.0	0.0	0.0	0.0	1.0	0.0	0.0	0.0	0.0	0.0	0.0	0.0	0.0
GRK2	156	symbol	H. sapiens	156	H. sapiens	0.0	0.0	0.0	0.0	0.0	0.0	1.0	0.0	1.0	0.0	0.0	0.0	0.0	0.0	0.0	0.0	0.0	0.0	0.0	0.0
JUP	3728	symbol	H. sapiens	3728	H. sapiens	0.0	0.0	0.0	0.0	0.0	0.0	0.0	1.0	0.0	0.0	0.0	1.0	0.0	0.0	0.0	0.0	1.0	0.0	0.0	0.0
IDI1	3422	symbol	H. sapiens	3422	H. sapiens	1.0	0.0	1.0	1.0	0.0	0.0	0.0	0.0	0.0	0.0	0.0	0.0	0.0	0.0	0.0	0.0	0.0	0.0	0.0	0.0
BCAP29	55973	symbol	H. sapiens	55973	H. sapiens	0.0	0.0	0.0	0.0	0.0	0.0	0.0	0.0	0.0	0.0	0.0	0.0	0.0	0.0	0.0	0.0	0.0	0.0	0.0	0.0
MVD	4597	symbol	H. sapiens	4597	H. sapiens	1.0	0.0	1.0	1.0	0.0	0.0	0.0	0.0	0.0	0.0	0.0	0.0	0.0	0.0	0.0	0.0	0.0	0.0	0.0	0.0
IFITM2	10581	symbol	H. sapiens	10581	H. sapiens	0.0	0.0	0.0	0.0	1.0	0.0	0.0	0.0	1.0	0.0	0.0	0.0	0.0	0.0	1.0	0.0	0.0	0.0	0.0	0.0
CYB5R1	51706	symbol	H. sapiens	51706	H. sapiens	1.0	0.0	0.0	0.0	0.0	0.0	1.0	0.0	0.0	0.0	0.0	0.0	0.0	0.0	0.0	0.0	0.0	0.0	0.0	0.0
GSS	2937	symbol	H. sapiens	2937	H. sapiens	0.0	0.0	0.0	1.0	0.0	0.0	0.0	0.0	0.0	0.0	1.0	0.0	0.0	0.0	0.0	0.0	0.0	0.0	0.0	1.0
IER3	8870	symbol	H. sapiens	8870	H. sapiens	0.0	0.0	0.0	0.0	0.0	0.0	0.0	0.0	0.0	0.0	0.0	0.0	0.0	0.0	0.0	0.0	0.0	0.0	0.0	0.0
SMAP2	64744	symbol	H. sapiens	64744	H. sapiens	0.0	0.0	0.0	0.0	0.0	0.0	0.0	0.0	0.0	0.0	0.0	0.0	0.0	0.0	0.0	0.0	0.0	0.0	0.0	0.0
IKBKE	9641	symbol	H. sapiens	9641	H. sapiens	0.0	0.0	0.0	0.0	1.0	0.0	0.0	0.0	0.0	1.0	0.0	1.0	0.0	0.0	1.0	1.0	0.0	0.0	0.0	0.0
MAGED1	9500	symbol	H. sapiens	9500	H. sapiens	0.0	0.0	0.0	0.0	0.0	0.0	0.0	1.0	0.0	1.0	0.0	1.0	0.0	0.0	0.0	0.0	0.0	0.0	1.0	0.0
ITGB5	3693	symbol	H. sapiens	3693	H. sapiens	0.0	0.0	0.0	0.0	0.0	0.0	0.0	0.0	1.0	0.0	0.0	0.0	0.0	0.0	0.0	0.0	1.0	0.0	0.0	0.0
ABAT	18	symbol	H. sapiens	18	H. sapiens	1.0	0.0	0.0	0.0	0.0	1.0	1.0	1.0	0.0	0.0	1.0	1.0	1.0	0.0	0.0	0.0	0.0	0.0	0.0	1.0
DDR1	780	symbol	H. sapiens	780	H. sapiens	0.0	0.0	0.0	0.0	0.0	0.0	0.0	0.0	0.0	0.0	0.0	1.0	0.0	0.0	0.0	0.0	1.0	0.0	0.0	0.0
TNKS1BP1	85456	symbol	H. sapiens	85456	H. sapiens	0.0	0.0	0.0	0.0	0.0	0.0	0.0	0.0	0.0	0.0	0.0	0.0	0.0	0.0	0.0	1.0	0.0	0.0	0.0	0.0
DHCR7	1717	symbol	H. sapiens	1717	H. sapiens	1.0	1.0	0.0	0.0	0.0	0.0	0.0	0.0	0.0	0.0	1.0	0.0	0.0	0.0	0.0	0.0	0.0	0.0	0.0	0.0
HID1	283987	symbol	H. sapiens	283987	H. sapiens	0.0	0.0	0.0	0.0	0.0	0.0	0.0	0.0	0.0	0.0	0.0	0.0	0.0	0.0	0.0	0.0	0.0	0.0	0.0	0.0
AKR1A1	10327	symbol	H. sapiens	10327	H. sapiens	1.0	0.0	0.0	1.0	0.0	1.0	1.0	0.0	0.0	0.0	1.0	0.0	1.0	0.0	0.0	0.0	0.0	0.0	0.0	0.0
DNAJA4	55466	symbol	H. sapiens	55466	H. sapiens	0.0	0.0	0.0	0.0	0.0	0.0	0.0	0.0	0.0	0.0	0.0	0.0	0.0	0.0	0.0	0.0	0.0	0.0	0.0	0.0
USP40	55230	symbol	H. sapiens	55230	H. sapiens	0.0	0.0	0.0	0.0	0.0	0.0	0.0	0.0	0.0	0.0	0.0	0.0	0.0	0.0	0.0	0.0	0.0	0.0	0.0	0.0
SLC50A1	55974	symbol	H. sapiens	55974	H. sapiens	0.0	0.0	0.0	0.0	0.0	0.0	0.0	0.0	0.0	0.0	0.0	0.0	0.0	1.0	0.0	0.0	0.0	1.0	0.0	0.0
STARD10	10809	symbol	H. sapiens	10809	H. sapiens	1.0	0.0	0.0	1.0	0.0	0.0	1.0	0.0	0.0	0.0	1.0	0.0	0.0	0.0	0.0	0.0	0.0	1.0	0.0	0.0
IFI30	10437	symbol	H. sapiens	10437	H. sapiens	0.0	0.0	0.0	0.0	1.0	0.0	0.0	0.0	1.0	0.0	0.0	0.0	0.0	0.0	0.0	0.0	0.0	0.0	0.0	0.0
MICB	4277	symbol	H. sapiens	4277	H. sapiens	0.0	0.0	0.0	0.0	0.0	0.0	0.0	0.0	1.0	0.0	0.0	1.0	0.0	0.0	1.0	1.0	0.0	0.0	0.0	0.0
SHISA5	51246	symbol	H. sapiens	51246	H. sapiens	0.0	0.0	0.0	0.0	0.0	0.0	0.0	0.0	0.0	1.0	0.0	0.0	0.0	0.0	0.0	0.0	0.0	0.0	0.0	0.0
KIAA1522	57648	symbol	H. sapiens	57648	H. sapiens	0.0	0.0	0.0	0.0	0.0	0.0	0.0	0.0	0.0	0.0	0.0	0.0	0.0	0.0	0.0	0.0	0.0	0.0	0.0	0.0
EEF1A2	1917	symbol	H. sapiens	1917	H. sapiens	1.0	0.0	0.0	0.0	0.0	0.0	0.0	1.0	0.0	0.0	0.0	0.0	0.0	0.0	0.0	0.0	0.0	0.0	0.0	1.0
WWC3	55841	symbol	H. sapiens	55841	H. sapiens	0.0	0.0	0.0	0.0	0.0	0.0	0.0	0.0	0.0	0.0	0.0	0.0	0.0	0.0	0.0	0.0	0.0	0.0	0.0	0.0
HLA-DRB1	3123	symbol	H. sapiens	3123	H. sapiens	0.0	0.0	0.0	0.0	1.0	0.0	0.0	0.0	1.0	0.0	0.0	0.0	0.0	0.0	0.0	1.0	0.0	0.0	0.0	0.0
SPDEF	25803	symbol	H. sapiens	25803	H. sapiens	0.0	0.0	0.0	0.0	0.0	0.0	0.0	1.0	0.0	0.0	0.0	0.0	0.0	0.0	0.0	0.0	0.0	0.0	0.0	0.0
EPN3	55040	symbol	H. sapiens	55040	H. sapiens	0.0	0.0	0.0	0.0	0.0	0.0	0.0	0.0	0.0	0.0	0.0	0.0	0.0	0.0	0.0	0.0	0.0	0.0	0.0	0.0
CAP2	10486	symbol	H. sapiens	10486	H. sapiens	0.0	0.0	0.0	0.0	0.0	0.0	0.0	0.0	0.0	0.0	0.0	0.0	0.0	0.0	0.0	0.0	0.0	0.0	0.0	0.0
S100A13	6284	symbol	H. sapiens	6284	H. sapiens	0.0	0.0	0.0	0.0	0.0	0.0	0.0	0.0	0.0	0.0	0.0	1.0	0.0	0.0	0.0	0.0	0.0	0.0	0.0	1.0
ATP2A3	489	symbol	H. sapiens	489	H. sapiens	0.0	0.0	0.0	0.0	0.0	0.0	0.0	0.0	0.0	0.0	0.0	0.0	0.0	0.0	0.0	0.0	0.0	0.0	0.0	0.0
ATPAF2	91647	symbol	H. sapiens	91647	H. sapiens	0.0	0.0	0.0	0.0	0.0	0.0	0.0	0.0	0.0	0.0	0.0	0.0	0.0	0.0	0.0	0.0	0.0	0.0	0.0	0.0
CRABP2	1382	symbol	H. sapiens	1382	H. sapiens	1.0	0.0	1.0	0.0	0.0	1.0	0.0	0.0	0.0	0.0	1.0	0.0	0.0	0.0	0.0	0.0	0.0	0.0	0.0	0.0
SQOR	58472	symbol	H. sapiens	58472	H. sapiens	0.0	0.0	0.0	1.0	0.0	0.0	0.0	0.0	0.0	0.0	0.0	0.0	0.0	0.0	0.0	0.0	0.0	0.0	0.0	0.0
FAM102B	284611	symbol	H. sapiens	284611	H. sapiens	0.0	0.0	0.0	0.0	0.0	0.0	0.0	0.0	0.0	0.0	0.0	0.0	0.0	0.0	0.0	0.0	0.0	0.0	0.0	0.0
STAT6	6778	symbol	H. sapiens	6778	H. sapiens	0.0	0.0	0.0	0.0	1.0	0.0	0.0	0.0	0.0	0.0	0.0	1.0	1.0	0.0	0.0	0.0	0.0	0.0	0.0	1.0
GDAP1	54332	symbol	H. sapiens	54332	H. sapiens	0.0	0.0	0.0	0.0	0.0	0.0	0.0	0.0	0.0	0.0	0.0	0.0	0.0	0.0	0.0	0.0	0.0	0.0	0.0	0.0
C1QTNF6	114904	symbol	H. sapiens	114904	H. sapiens	0.0	0.0	0.0	0.0	0.0	0.0	0.0	0.0	0.0	0.0	0.0	0.0	0.0	0.0	0.0	0.0	0.0	0.0	0.0	0.0
C3	718	symbol	H. sapiens	718	H. sapiens	1.0	0.0	0.0	0.0	0.0	1.0	0.0	0.0	0.0	0.0	0.0	1.0	0.0	1.0	0.0	1.0	0.0	0.0	0.0	0.0
EFEMP1	2202	symbol	H. sapiens	2202	H. sapiens	0.0	1.0	0.0	0.0	0.0	0.0	0.0	0.0	0.0	0.0	0.0	0.0	0.0	0.0	0.0	0.0	0.0	0.0	0.0	0.0
PPM1K	152926	symbol	H. sapiens	152926	H. sapiens	0.0	0.0	0.0	0.0	0.0	0.0	1.0	0.0	0.0	0.0	1.0	0.0	0.0	0.0	0.0	0.0	0.0	0.0	0.0	0.0
RDH11	51109	symbol	H. sapiens	51109	H. sapiens	1.0	0.0	1.0	0.0	0.0	0.0	0.0	0.0	0.0	0.0	1.0	0.0	1.0	0.0	0.0	0.0	0.0	0.0	0.0	0.0
CKMT1A	548596	symbol	H. sapiens	548596	H. sapiens	0.0	0.0	0.0	1.0	0.0	0.0	0.0	0.0	0.0	0.0	1.0	0.0	0.0	0.0	0.0	0.0	0.0	0.0	0.0	0.0
ADIPOR2	79602	symbol	H. sapiens	79602	H. sapiens	1.0	0.0	0.0	0.0	1.0	1.0	0.0	0.0	0.0	0.0	0.0	0.0	0.0	1.0	0.0	0.0	0.0	0.0	0.0	0.0
DHCR24	1718	symbol	H. sapiens	1718	H. sapiens	1.0	1.0	0.0	0.0	0.0	0.0	0.0	0.0	0.0	0.0	0.0	1.0	0.0	0.0	0.0	1.0	0.0	0.0	0.0	0.0
ECH1	1891	symbol	H. sapiens	1891	H. sapiens	0.0	0.0	0.0	0.0	0.0	1.0	1.0	0.0	0.0	0.0	0.0	0.0	0.0	0.0	0.0	0.0	0.0	0.0	0.0	0.0
RUSC2	9853	symbol	H. sapiens	9853	H. sapiens	0.0	0.0	0.0	0.0	0.0	0.0	0.0	0.0	0.0	0.0	0.0	0.0	0.0	0.0	0.0	0.0	0.0	0.0	0.0	0.0
PCDH10	57575	symbol	H. sapiens	57575	H. sapiens	0.0	0.0	0.0	0.0	0.0	0.0	0.0	0.0	0.0	0.0	0.0	0.0	0.0	0.0	0.0	0.0	0.0	0.0	0.0	0.0
ACOT2	10965	symbol	H. sapiens	10965	H. sapiens	0.0	0.0	0.0	1.0	0.0	1.0	0.0	0.0	0.0	0.0	0.0	0.0	0.0	0.0	0.0	0.0	0.0	0.0	0.0	0.0
ABCC5	10057	symbol	H. sapiens	10057	H. sapiens	0.0	0.0	0.0	0.0	0.0	1.0	1.0	0.0	0.0	0.0	0.0	0.0	0.0	0.0	0.0	0.0	0.0	0.0	0.0	0.0
LAMB2	3913	symbol	H. sapiens	3913	H. sapiens	0.0	0.0	0.0	0.0	0.0	0.0	0.0	0.0	0.0	0.0	0.0	0.0	0.0	0.0	0.0	0.0	1.0	0.0	0.0	0.0
IGSF1	3547	symbol	H. sapiens	3547	H. sapiens	0.0	0.0	0.0	0.0	0.0	0.0	0.0	0.0	0.0	0.0	0.0	0.0	0.0	0.0	0.0	0.0	0.0	0.0	0.0	0.0
PIM3	415116	symbol	H. sapiens	415116	H. sapiens	0.0	0.0	0.0	0.0	0.0	0.0	0.0	0.0	0.0	0.0	1.0	0.0	0.0	0.0	0.0	0.0	0.0	0.0	0.0	0.0
RORC	6097	symbol	H. sapiens	6097	H. sapiens	1.0	0.0	0.0	0.0	1.0	0.0	0.0	0.0	0.0	0.0	0.0	0.0	0.0	0.0	0.0	0.0	0.0	0.0	1.0	0.0
SLC39A6	25800	symbol	H. sapiens	25800	H. sapiens	0.0	0.0	0.0	0.0	0.0	0.0	0.0	0.0	0.0	0.0	0.0	0.0	0.0	0.0	0.0	0.0	0.0	0.0	0.0	0.0
LDHD	197257	symbol	H. sapiens	197257	H. sapiens	1.0	0.0	0.0	0.0	0.0	1.0	1.0	0.0	0.0	0.0	1.0	0.0	0.0	0.0	0.0	0.0	0.0	0.0	0.0	0.0
SIAH2	6478	symbol	H. sapiens	6478	H. sapiens	0.0	0.0	0.0	0.0	0.0	0.0	0.0	0.0	0.0	1.0	0.0	0.0	0.0	0.0	0.0	0.0	0.0	0.0	1.0	0.0
CCL28	56477	symbol	H. sapiens	56477	H. sapiens	0.0	0.0	0.0	0.0	0.0	0.0	0.0	0.0	0.0	0.0	0.0	1.0	0.0	0.0	0.0	0.0	1.0	0.0	0.0	0.0
VTCN1	79679	symbol	H. sapiens	79679	H. sapiens	0.0	0.0	0.0	0.0	0.0	0.0	0.0	0.0	0.0	0.0	0.0	1.0	0.0	0.0	0.0	1.0	0.0	0.0	0.0	0.0
FDFT1	2222	symbol	H. sapiens	2222	H. sapiens	1.0	0.0	1.0	0.0	0.0	0.0	0.0	0.0	0.0	0.0	0.0	0.0	0.0	0.0	0.0	0.0	0.0	0.0	0.0	0.0
SULT1A1	6817	symbol	H. sapiens	6817	H. sapiens	1.0	0.0	0.0	1.0	0.0	0.0	1.0	0.0	0.0	0.0	1.0	0.0	1.0	0.0	0.0	0.0	0.0	0.0	0.0	0.0
CCDC32	90416	symbol	H. sapiens	90416	H. sapiens	0.0	0.0	0.0	0.0	0.0	0.0	0.0	0.0	0.0	0.0	0.0	0.0	0.0	0.0	0.0	0.0	0.0	0.0	0.0	0.0
COMT	1312	symbol	H. sapiens	1312	H. sapiens	1.0	0.0	0.0	1.0	0.0	1.0	0.0	0.0	0.0	0.0	1.0	1.0	0.0	0.0	0.0	0.0	0.0	0.0	0.0	0.0
STAT2	6773	symbol	H. sapiens	6773	H. sapiens	0.0	0.0	0.0	0.0	1.0	0.0	0.0	0.0	0.0	0.0	0.0	0.0	0.0	0.0	1.0	0.0	0.0	0.0	0.0	0.0
EXOC6	54536	symbol	H. sapiens	54536	H. sapiens	0.0	0.0	0.0	0.0	0.0	0.0	0.0	0.0	0.0	0.0	0.0	0.0	0.0	0.0	0.0	0.0	0.0	0.0	0.0	0.0
MLLT11	10962	symbol	H. sapiens	10962	H. sapiens	0.0	0.0	0.0	0.0	0.0	0.0	0.0	1.0	0.0	1.0	0.0	0.0	0.0	0.0	0.0	0.0	0.0	0.0	0.0	0.0
SC5D	6309	symbol	H. sapiens	6309	H. sapiens	1.0	1.0	0.0	0.0	0.0	0.0	0.0	0.0	0.0	0.0	0.0	0.0	0.0	0.0	0.0	0.0	0.0	0.0	0.0	0.0
SCD	6319	symbol	H. sapiens	6319	H. sapiens	1.0	0.0	0.0	1.0	0.0	1.0	0.0	0.0	0.0	0.0	0.0	0.0	0.0	0.0	0.0	0.0	0.0	0.0	0.0	0.0
AL035661.1						nan	nan	nan	nan	nan	nan	nan	nan	nan	nan	nan	nan	nan	nan	nan	nan	nan	nan	nan	nan
INSIG1	3638	symbol	H. sapiens	3638	H. sapiens	1.0	0.0	0.0	0.0	0.0	1.0	0.0	0.0	0.0	0.0	0.0	0.0	0.0	0.0	0.0	0.0	0.0	0.0	1.0	0.0
TRIM38	10475	symbol	H. sapiens	10475	H. sapiens	0.0	0.0	0.0	0.0	1.0	0.0	0.0	0.0	1.0	0.0	0.0	1.0	0.0	0.0	1.0	0.0	0.0	0.0	0.0	0.0
ABCD1	215	symbol	H. sapiens	215	H. sapiens	1.0	0.0	0.0	1.0	0.0	1.0	1.0	1.0	0.0	0.0	0.0	1.0	0.0	0.0	0.0	0.0	0.0	1.0	0.0	0.0
AP001972.5						nan	nan	nan	nan	nan	nan	nan	nan	nan	nan	nan	nan	nan	nan	nan	nan	nan	nan	nan	nan
RAB4B	53916	symbol	H. sapiens	53916	H. sapiens	0.0	0.0	0.0	0.0	0.0	0.0	0.0	0.0	0.0	0.0	0.0	0.0	0.0	1.0	0.0	0.0	0.0	0.0	0.0	0.0
BAG1	573	symbol	H. sapiens	573	H. sapiens	0.0	0.0	0.0	0.0	0.0	0.0	0.0	0.0	0.0	0.0	0.0	0.0	0.0	0.0	0.0	0.0	0.0	0.0	0.0	0.0
HIST1H2BK	85236	gene_synonym	H. sapiens	85236	H. sapiens	0.0	0.0	0.0	0.0	0.0	0.0	0.0	0.0	0.0	0.0	0.0	0.0	0.0	0.0	1.0	0.0	0.0	0.0	0.0	0.0
SLC6A14	11254	symbol	H. sapiens	11254	H. sapiens	0.0	0.0	0.0	0.0	0.0	0.0	1.0	0.0	0.0	0.0	1.0	0.0	1.0	0.0	0.0	0.0	0.0	0.0	0.0	0.0
TMEM229B	161145	symbol	H. sapiens	161145	H. sapiens	0.0	0.0	0.0	0.0	0.0	0.0	0.0	0.0	0.0	0.0	0.0	0.0	0.0	0.0	0.0	0.0	0.0	0.0	0.0	0.0
SELENBP1	8991	symbol	H. sapiens	8991	H. sapiens	0.0	0.0	0.0	0.0	0.0	0.0	0.0	0.0	0.0	0.0	0.0	0.0	0.0	0.0	0.0	0.0	0.0	0.0	0.0	0.0
GBP3	2635	symbol	H. sapiens	2635	H. sapiens	0.0	0.0	0.0	0.0	0.0	0.0	0.0	0.0	1.0	0.0	0.0	0.0	0.0	0.0	1.0	0.0	0.0	0.0	0.0	0.0
ANXA6	309	symbol	H. sapiens	309	H. sapiens	0.0	0.0	0.0	0.0	0.0	0.0	0.0	0.0	0.0	1.0	0.0	0.0	0.0	0.0	0.0	0.0	0.0	0.0	0.0	0.0
ARMCX1	51309	symbol	H. sapiens	51309	H. sapiens	0.0	0.0	0.0	0.0	0.0	0.0	0.0	0.0	0.0	0.0	0.0	0.0	0.0	0.0	0.0	0.0	0.0	0.0	0.0	0.0
MAPK8IP2	23542	symbol	H. sapiens	23542	H. sapiens	0.0	0.0	0.0	0.0	0.0	0.0	0.0	1.0	0.0	1.0	0.0	0.0	0.0	0.0	0.0	0.0	0.0	0.0	0.0	0.0
TIMP1	7076	symbol	H. sapiens	7076	H. sapiens	0.0	0.0	0.0	0.0	1.0	0.0	0.0	0.0	1.0	0.0	0.0	0.0	0.0	0.0	0.0	0.0	0.0	0.0	0.0	0.0
MUC20	200958	symbol	H. sapiens	200958	H. sapiens	0.0	0.0	0.0	0.0	0.0	0.0	0.0	0.0	0.0	0.0	0.0	0.0	0.0	0.0	0.0	1.0	0.0	0.0	0.0	0.0
UBE2QL1	134111	symbol	H. sapiens	134111	H. sapiens	0.0	0.0	0.0	0.0	0.0	0.0	0.0	0.0	0.0	0.0	0.0	0.0	0.0	0.0	0.0	0.0	0.0	0.0	0.0	0.0
AC068580.4						nan	nan	nan	nan	nan	nan	nan	nan	nan	nan	nan	nan	nan	nan	nan	nan	nan	nan	nan	nan
LSS	4047	symbol	H. sapiens	4047	H. sapiens	1.0	0.0	1.0	0.0	0.0	0.0	0.0	0.0	0.0	0.0	0.0	0.0	0.0	0.0	0.0	0.0	0.0	0.0	0.0	0.0
HIST1H1C	3006	gene_synonym	H. sapiens	3006	H. sapiens	0.0	0.0	0.0	0.0	0.0	0.0	0.0	0.0	0.0	0.0	0.0	0.0	0.0	0.0	0.0	0.0	0.0	0.0	0.0	0.0
ABCA12	26154	symbol	H. sapiens	26154	H. sapiens	0.0	0.0	0.0	0.0	0.0	0.0	1.0	0.0	0.0	0.0	0.0	0.0	0.0	0.0	0.0	0.0	0.0	1.0	0.0	0.0
SLC4A10	57282	symbol	H. sapiens	57282	H. sapiens	0.0	1.0	0.0	0.0	0.0	0.0	1.0	0.0	0.0	0.0	0.0	0.0	0.0	0.0	0.0	0.0	0.0	0.0	0.0	0.0
SPTSSB	165679	symbol	H. sapiens	165679	H. sapiens	1.0	0.0	0.0	0.0	0.0	0.0	0.0	0.0	0.0	0.0	0.0	0.0	0.0	0.0	0.0	0.0	0.0	0.0	0.0	0.0
BNIPL	149428	symbol	H. sapiens	149428	H. sapiens	0.0	0.0	0.0	0.0	0.0	0.0	0.0	0.0	0.0	0.0	0.0	1.0	0.0	0.0	0.0	0.0	0.0	0.0	0.0	0.0
BTN2A2	10385	symbol	H. sapiens	10385	H. sapiens	0.0	0.0	0.0	0.0	0.0	0.0	0.0	0.0	0.0	0.0	0.0	1.0	0.0	0.0	0.0	1.0	0.0	0.0	0.0	0.0
S100A16	140576	symbol	H. sapiens	140576	H. sapiens	0.0	0.0	0.0	0.0	0.0	0.0	0.0	0.0	0.0	0.0	0.0	0.0	0.0	0.0	0.0	0.0	0.0	0.0	0.0	1.0
NOCT	25819	symbol	H. sapiens	25819	H. sapiens	0.0	0.0	0.0	0.0	0.0	0.0	0.0	0.0	0.0	0.0	0.0	0.0	0.0	0.0	0.0	0.0	0.0	0.0	1.0	0.0
CAB39L	81617	symbol	H. sapiens	81617	H. sapiens	0.0	0.0	0.0	0.0	0.0	0.0	0.0	0.0	0.0	0.0	0.0	0.0	0.0	0.0	0.0	1.0	0.0	0.0	0.0	0.0
TFF1	7031	symbol	H. sapiens	7031	H. sapiens	0.0	0.0	0.0	0.0	0.0	0.0	0.0	0.0	0.0	0.0	0.0	1.0	0.0	0.0	0.0	0.0	0.0	0.0	0.0	1.0
IFITM10	402778	symbol	H. sapiens	402778	H. sapiens	0.0	0.0	0.0	0.0	0.0	0.0	0.0	0.0	0.0	0.0	0.0	0.0	0.0	0.0	0.0	0.0	0.0	0.0	0.0	0.0
TMEM265	100862671	symbol	H. sapiens	100862671	H. sapiens	0.0	0.0	0.0	0.0	0.0	0.0	0.0	0.0	0.0	0.0	0.0	0.0	0.0	0.0	0.0	0.0	0.0	0.0	0.0	0.0
FMO5	2330	symbol	H. sapiens	2330	H. sapiens	0.0	0.0	0.0	0.0	0.0	0.0	0.0	0.0	0.0	0.0	0.0	0.0	0.0	0.0	0.0	0.0	0.0	0.0	0.0	0.0
S100A14	57402	symbol	H. sapiens	57402	H. sapiens	0.0	0.0	0.0	0.0	0.0	0.0	0.0	0.0	0.0	0.0	0.0	0.0	0.0	0.0	1.0	1.0	0.0	0.0	0.0	0.0
BLNK	29760	symbol	H. sapiens	29760	H. sapiens	0.0	0.0	0.0	0.0	0.0	0.0	0.0	0.0	0.0	0.0	0.0	0.0	0.0	0.0	0.0	0.0	0.0	0.0	0.0	0.0
QPRT	23475	symbol	H. sapiens	23475	H. sapiens	0.0	0.0	0.0	1.0	0.0	0.0	1.0	0.0	0.0	0.0	1.0	0.0	0.0	0.0	0.0	0.0	0.0	0.0	0.0	0.0
MUC1	4582	symbol	H. sapiens	4582	H. sapiens	0.0	0.0	0.0	0.0	1.0	0.0	0.0	0.0	0.0	1.0	0.0	1.0	0.0	0.0	0.0	1.0	0.0	0.0	0.0	0.0
AC009086.2						nan	nan	nan	nan	nan	nan	nan	nan	nan	nan	nan	nan	nan	nan	nan	nan	nan	nan	nan	nan
ASCL1	429	symbol	H. sapiens	429	H. sapiens	0.0	0.0	0.0	0.0	0.0	0.0	0.0	1.0	0.0	0.0	0.0	0.0	0.0	0.0	0.0	0.0	0.0	0.0	0.0	1.0
CRISP3	10321	symbol	H. sapiens	10321	H. sapiens	0.0	0.0	0.0	0.0	0.0	0.0	0.0	0.0	0.0	0.0	0.0	0.0	0.0	0.0	0.0	0.0	0.0	0.0	0.0	0.0
ALDH3B2	222	symbol	H. sapiens	222	H. sapiens	1.0	0.0	0.0	0.0	0.0	0.0	1.0	0.0	0.0	0.0	1.0	0.0	1.0	0.0	0.0	0.0	0.0	0.0	0.0	0.0
KMO	8564	symbol	H. sapiens	8564	H. sapiens	0.0	0.0	0.0	1.0	0.0	1.0	1.0	1.0	0.0	0.0	1.0	0.0	0.0	0.0	0.0	0.0	0.0	0.0	0.0	0.0

## Sheet: Enrichment_up_LNA
GroupID	Category	Term	Description	LogP	Log(q-value)	InTerm_InList	Genes	Symbols
1_Summary	GO Biological Processes	GO:0016126	sterol biosynthetic process	-13.4636	-9.26304	12/81	1717,1718,2222,3156,3422,3638,4047,4597,6309,6319,6713,51706,6820,18,222,1312,6817,10327,51109,197257,6097,215,718,79602,1382,10809,23761,165679,5721,93974,1917	DHCR7,DHCR24,FDFT1,HMGCR,IDI1,INSIG1,LSS,MVD,SC5D,SCD,SQLE,CYB5R1,SULT2B1,ABAT,ALDH3B2,COMT,SULT1A1,AKR1A1,RDH11,LDHD,RORC,ABCD1,C3,ADIPOR2,CRABP2,STARD10,PISD,SPTSSB,PSME2,ATP5IF1,EEF1A2
1_Member	GO Biological Processes	GO:0016126	sterol biosynthetic process	-13.4636	-9.26304	12/81	1717,1718,2222,3156,3422,3638,4047,4597,6309,6319,6713,51706	DHCR7,DHCR24,FDFT1,HMGCR,IDI1,INSIG1,LSS,MVD,SC5D,SCD,SQLE,CYB5R1
1_Member	GO Biological Processes	GO:0006695	cholesterol biosynthetic process	-12.3304	-8.54114	11/75	1717,1718,2222,3156,3422,3638,4047,4597,6309,6319,6713	DHCR7,DHCR24,FDFT1,HMGCR,IDI1,INSIG1,LSS,MVD,SC5D,SCD,SQLE
1_Member	GO Biological Processes	GO:1902653	secondary alcohol biosynthetic process	-12.2646	-8.54114	11/76	1717,1718,2222,3156,3422,3638,4047,4597,6309,6319,6713	DHCR7,DHCR24,FDFT1,HMGCR,IDI1,INSIG1,LSS,MVD,SC5D,SCD,SQLE
1_Member	GO Biological Processes	GO:0045540	regulation of cholesterol biosynthetic process	-11.0187	-7.51713	9/50	1717,2222,3156,3422,4047,4597,6309,6319,6713	DHCR7,FDFT1,HMGCR,IDI1,LSS,MVD,SC5D,SCD,SQLE
1_Member	GO Biological Processes	GO:0106118	regulation of sterol biosynthetic process	-11.0187	-7.51713	9/50	1717,2222,3156,3422,4047,4597,6309,6319,6713	DHCR7,FDFT1,HMGCR,IDI1,LSS,MVD,SC5D,SCD,SQLE
1_Member	GO Biological Processes	GO:0016125	sterol metabolic process	-10.9157	-7.4933	13/166	1717,1718,2222,3156,3422,3638,4047,4597,6309,6319,6713,6820,51706	DHCR7,DHCR24,FDFT1,HMGCR,IDI1,INSIG1,LSS,MVD,SC5D,SCD,SQLE,SULT2B1,CYB5R1
1_Member	GO Biological Processes	GO:1901615	organic hydroxy compound metabolic process	-10.5732	-7.2177	20/535	18,222,1312,1717,1718,2222,3156,3422,3638,4047,4597,6309,6319,6713,6817,6820,10327,51109,51706,197257	ABAT,ALDH3B2,COMT,DHCR7,DHCR24,FDFT1,HMGCR,IDI1,INSIG1,LSS,MVD,SC5D,SCD,SQLE,SULT1A1,SULT2B1,AKR1A1,RDH11,CYB5R1,LDHD
1_Member	GO Biological Processes	GO:0008203	cholesterol metabolic process	-10.2203	-6.9228	12/150	1717,1718,2222,3156,3422,3638,4047,4597,6309,6319,6713,6820	DHCR7,DHCR24,FDFT1,HMGCR,IDI1,INSIG1,LSS,MVD,SC5D,SCD,SQLE,SULT2B1
1_Member	GO Biological Processes	GO:0008202	steroid metabolic process	-10.1465	-6.90019	16/331	1312,1717,1718,2222,3156,3422,3638,4047,4597,6097,6309,6319,6713,6817,6820,51706	COMT,DHCR7,DHCR24,FDFT1,HMGCR,IDI1,INSIG1,LSS,MVD,RORC,SC5D,SCD,SQLE,SULT1A1,SULT2B1,CYB5R1
1_Member	GO Biological Processes	GO:0090181	regulation of cholesterol metabolic process	-10.0705	-6.89414	9/63	1717,2222,3156,3422,4047,4597,6309,6319,6713	DHCR7,FDFT1,HMGCR,IDI1,LSS,MVD,SC5D,SCD,SQLE
1_Member	GO Biological Processes	GO:1902652	secondary alcohol metabolic process	-10.0533	-6.89414	12/155	1717,1718,2222,3156,3422,3638,4047,4597,6309,6319,6713,6820	DHCR7,DHCR24,FDFT1,HMGCR,IDI1,INSIG1,LSS,MVD,SC5D,SCD,SQLE,SULT2B1
1_Member	GO Biological Processes	GO:0046890	regulation of lipid biosynthetic process	-9.95248	-6.83108	13/198	215,718,1717,2222,3156,3422,3638,4047,4597,6309,6319,6713,79602	ABCD1,C3,DHCR7,FDFT1,HMGCR,IDI1,INSIG1,LSS,MVD,SC5D,SCD,SQLE,ADIPOR2
1_Member	GO Biological Processes	GO:0019218	regulation of steroid metabolic process	-9.89435	-6.80772	11/124	1717,2222,3156,3422,3638,4047,4597,6097,6309,6319,6713	DHCR7,FDFT1,HMGCR,IDI1,INSIG1,LSS,MVD,RORC,SC5D,SCD,SQLE
1_Member	GO Biological Processes	GO:0050810	regulation of steroid biosynthetic process	-9.78051	-6.72606	10/95	1717,2222,3156,3422,3638,4047,4597,6309,6319,6713	DHCR7,FDFT1,HMGCR,IDI1,INSIG1,LSS,MVD,SC5D,SCD,SQLE
1_Member	GO Biological Processes	GO:0006066	alcohol metabolic process	-9.53969	-6.5152	16/364	222,1717,1718,2222,3156,3422,3638,4047,4597,6309,6319,6713,6817,6820,10327,51109	ALDH3B2,DHCR7,DHCR24,FDFT1,HMGCR,IDI1,INSIG1,LSS,MVD,SC5D,SCD,SQLE,SULT1A1,SULT2B1,AKR1A1,RDH11
1_Member	GO Biological Processes	GO:1902930	regulation of alcohol biosynthetic process	-9.06551	-6.06906	9/81	1717,2222,3156,3422,4047,4597,6309,6319,6713	DHCR7,FDFT1,HMGCR,IDI1,LSS,MVD,SC5D,SCD,SQLE
1_Member	GO Biological Processes	GO:0006694	steroid biosynthetic process	-8.87516	-5.90504	12/196	1717,1718,2222,3156,3422,3638,4047,4597,6309,6319,6713,51706	DHCR7,DHCR24,FDFT1,HMGCR,IDI1,INSIG1,LSS,MVD,SC5D,SCD,SQLE,CYB5R1
1_Member	GO Biological Processes	GO:0008610	lipid biosynthetic process	-8.45457	-5.50926	20/708	215,222,718,1382,1717,1718,2222,3156,3422,3638,4047,4597,6309,6319,6713,10809,23761,51706,79602,165679	ABCD1,ALDH3B2,C3,CRABP2,DHCR7,DHCR24,FDFT1,HMGCR,IDI1,INSIG1,LSS,MVD,SC5D,SCD,SQLE,STARD10,PISD,CYB5R1,ADIPOR2,SPTSSB
1_Member	GO Biological Processes	GO:0046165	alcohol biosynthetic process	-8.29582	-5.374	11/175	1717,1718,2222,3156,3422,3638,4047,4597,6309,6319,6713	DHCR7,DHCR24,FDFT1,HMGCR,IDI1,INSIG1,LSS,MVD,SC5D,SCD,SQLE
1_Member	GO Biological Processes	GO:0062012	regulation of small molecule metabolic process	-8.09461	-5.19506	16/459	215,1312,1717,2222,3156,3422,3638,4047,4597,5721,6097,6309,6319,6713,79602,93974	ABCD1,COMT,DHCR7,FDFT1,HMGCR,IDI1,INSIG1,LSS,MVD,PSME2,RORC,SC5D,SCD,SQLE,ADIPOR2,ATP5IF1
1_Member	GO Biological Processes	GO:0019216	regulation of lipid metabolic process	-7.89271	-5.01435	15/410	215,718,1717,1917,2222,3156,3422,3638,4047,4597,6097,6309,6319,6713,79602	ABCD1,C3,DHCR7,EEF1A2,FDFT1,HMGCR,IDI1,INSIG1,LSS,MVD,RORC,SC5D,SCD,SQLE,ADIPOR2
1_Member	GO Biological Processes	GO:1901617	organic hydroxy compound biosynthetic process	-7.30101	-4.44286	12/271	1717,1718,2222,3156,3422,3638,4047,4597,6309,6319,6713,51706	DHCR7,DHCR24,FDFT1,HMGCR,IDI1,INSIG1,LSS,MVD,SC5D,SCD,SQLE,CYB5R1
1_Member	GO Biological Processes	GO:0008299	isoprenoid biosynthetic process	-6.23619	-3.39734	5/29	1382,3156,3422,4047,4597	CRABP2,HMGCR,IDI1,LSS,MVD
2_Summary	GO Biological Processes	GO:0033489	cholesterol biosynthetic process via desmosterol	-6.14812	-3.34549	3/4	1717,1718,6309,2202,57282	DHCR7,DHCR24,SC5D,EFEMP1,SLC4A10
2_Member	GO Biological Processes	GO:0033489	cholesterol biosynthetic process via desmosterol	-6.14812	-3.34549	3/4	1717,1718,6309	DHCR7,DHCR24,SC5D
2_Member	GO Biological Processes	GO:0033490	cholesterol biosynthetic process via lathosterol	-6.14812	-3.34549	3/4	1717,1718,6309	DHCR7,DHCR24,SC5D
2_Member	GO Biological Processes	GO:0009791	post-embryonic development	-1.86031	0	3/88	1717,2202,57282	DHCR7,EFEMP1,SLC4A10
3_Summary	GO Biological Processes	GO:0006720	isoprenoid metabolic process	-5.88109	-3.09548	8/139	1382,2222,3156,3422,4047,4597,6385,51109	CRABP2,FDFT1,HMGCR,IDI1,LSS,MVD,SDC4,RDH11
3_Member	GO Biological Processes	GO:0006720	isoprenoid metabolic process	-5.88109	-3.09548	8/139	1382,2222,3156,3422,4047,4597,6385,51109	CRABP2,FDFT1,HMGCR,IDI1,LSS,MVD,SDC4,RDH11
3_Member	GO Biological Processes	GO:0006721	terpenoid metabolic process	-3.20993	-0.600416	5/120	1382,2222,4047,6385,51109	CRABP2,FDFT1,LSS,SDC4,RDH11
3_Member	GO Biological Processes	GO:0001523	retinoid metabolic process	-1.66862	0	3/104	1382,6385,51109	CRABP2,SDC4,RDH11
3_Member	GO Biological Processes	GO:0016101	diterpenoid metabolic process	-1.60542	0	3/110	1382,6385,51109	CRABP2,SDC4,RDH11
4_Summary	GO Biological Processes	GO:0033865	nucleoside bisphosphate metabolic process	-4.80896	-2.07079	7/140	215,3156,4597,6319,6817,6820,10965,1312,2937,10327,58472,8564,23475,93974,3422,10809,23761,548596	ABCD1,HMGCR,MVD,SCD,SULT1A1,SULT2B1,ACOT2,COMT,GSS,AKR1A1,SQOR,KMO,QPRT,ATP5IF1,IDI1,STARD10,PISD,CKMT1A
4_Member	GO Biological Processes	GO:0033865	nucleoside bisphosphate metabolic process	-4.80896	-2.07079	7/140	215,3156,4597,6319,6817,6820,10965	ABCD1,HMGCR,MVD,SCD,SULT1A1,SULT2B1,ACOT2
4_Member	GO Biological Processes	GO:0033875	ribonucleoside bisphosphate metabolic process	-4.80896	-2.07079	7/140	215,3156,4597,6319,6817,6820,10965	ABCD1,HMGCR,MVD,SCD,SULT1A1,SULT2B1,ACOT2
4_Member	GO Biological Processes	GO:0034032	purine nucleoside bisphosphate metabolic process	-4.80896	-2.07079	7/140	215,3156,4597,6319,6817,6820,10965	ABCD1,HMGCR,MVD,SCD,SULT1A1,SULT2B1,ACOT2
4_Member	GO Biological Processes	GO:0006790	sulfur compound metabolic process	-4.26814	-1.55893	10/372	215,1312,2937,4597,6319,6817,6820,10327,10965,58472	ABCD1,COMT,GSS,MVD,SCD,SULT1A1,SULT2B1,AKR1A1,ACOT2,SQOR
4_Member	GO Biological Processes	GO:0006732	coenzyme metabolic process	-2.65205	-0.229629	8/405	215,3156,4597,6319,8564,10327,10965,23475	ABCD1,HMGCR,MVD,SCD,KMO,AKR1A1,ACOT2,QPRT
4_Member	GO Biological Processes	GO:0051186	cofactor metabolic process	-2.62305	-0.2078	10/604	215,2937,3156,4597,6319,8564,10327,10965,23475,93974	ABCD1,GSS,HMGCR,MVD,SCD,KMO,AKR1A1,ACOT2,QPRT,ATP5IF1
4_Member	GO Biological Processes	GO:0006637	acyl-CoA metabolic process	-2.51693	-0.1417	4/105	215,4597,6319,10965	ABCD1,MVD,SCD,ACOT2
4_Member	GO Biological Processes	GO:0035383	thioester metabolic process	-2.51693	-0.1417	4/105	215,4597,6319,10965	ABCD1,MVD,SCD,ACOT2
4_Member	GO Biological Processes	GO:0009117	nucleotide metabolic process	-2.13444	0	10/710	215,3156,4597,6319,6817,6820,8564,10965,23475,93974	ABCD1,HMGCR,MVD,SCD,SULT1A1,SULT2B1,KMO,ACOT2,QPRT,ATP5IF1
4_Member	GO Biological Processes	GO:0006753	nucleoside phosphate metabolic process	-2.10596	0	10/717	215,3156,4597,6319,6817,6820,8564,10965,23475,93974	ABCD1,HMGCR,MVD,SCD,SULT1A1,SULT2B1,KMO,ACOT2,QPRT,ATP5IF1
4_Member	GO Biological Processes	GO:0051188	cofactor biosynthetic process	-1.96395	0	6/326	2937,6319,8564,10327,23475,93974	GSS,SCD,KMO,AKR1A1,QPRT,ATP5IF1
4_Member	GO Biological Processes	GO:0009150	purine ribonucleotide metabolic process	-1.90587	0	8/543	215,3156,4597,6319,6817,6820,10965,93974	ABCD1,HMGCR,MVD,SCD,SULT1A1,SULT2B1,ACOT2,ATP5IF1
4_Member	GO Biological Processes	GO:0009259	ribonucleotide metabolic process	-1.84092	0	8/558	215,3156,4597,6319,6817,6820,10965,93974	ABCD1,HMGCR,MVD,SCD,SULT1A1,SULT2B1,ACOT2,ATP5IF1
4_Member	GO Biological Processes	GO:0006163	purine nucleotide metabolic process	-1.76628	0	8/576	215,3156,4597,6319,6817,6820,10965,93974	ABCD1,HMGCR,MVD,SCD,SULT1A1,SULT2B1,ACOT2,ATP5IF1
4_Member	GO Biological Processes	GO:0019693	ribose phosphate metabolic process	-1.7582	0	8/578	215,3156,4597,6319,6817,6820,10965,93974	ABCD1,HMGCR,MVD,SCD,SULT1A1,SULT2B1,ACOT2,ATP5IF1
4_Member	GO Biological Processes	GO:0090407	organophosphate biosynthetic process	-1.7365	0	9/699	3422,4597,6319,8564,10327,10809,23475,23761,548596	IDI1,MVD,SCD,KMO,AKR1A1,STARD10,QPRT,PISD,CKMT1A
4_Member	GO Biological Processes	GO:0072521	purine-containing compound metabolic process	-1.62329	0	8/613	215,3156,4597,6319,6817,6820,10965,93974	ABCD1,HMGCR,MVD,SCD,SULT1A1,SULT2B1,ACOT2,ATP5IF1
5_Summary	GO Biological Processes	GO:0019221	cytokine-mediated signaling pathway	-4.30738	-1.58393	15/798	1997,3123,4582,5721,6097,6648,6773,6778,7076,7726,9641,10437,10475,10581,79602	ELF1,HLA-DRB1,MUC1,PSME2,RORC,SOD2,STAT2,STAT6,TIMP1,TRIM26,IKBKE,IFI30,TRIM38,IFITM2,ADIPOR2
5_Member	GO Biological Processes	GO:0019221	cytokine-mediated signaling pathway	-4.30738	-1.58393	15/798	1997,3123,4582,5721,6097,6648,6773,6778,7076,7726,9641,10437,10475,10581,79602	ELF1,HLA-DRB1,MUC1,PSME2,RORC,SOD2,STAT2,STAT6,TIMP1,TRIM26,IKBKE,IFI30,TRIM38,IFITM2,ADIPOR2
6_Summary	GO Biological Processes	GO:0042180	cellular ketone metabolic process	-4.05419	-1.35876	8/248	215,1312,3156,3638,5721,8564,10327,79602,18,718,1382,1891,6319,10965,197257,10057	ABCD1,COMT,HMGCR,INSIG1,PSME2,KMO,AKR1A1,ADIPOR2,ABAT,C3,CRABP2,ECH1,SCD,ACOT2,LDHD,ABCC5
6_Member	GO Biological Processes	GO:0042180	cellular ketone metabolic process	-4.05419	-1.35876	8/248	215,1312,3156,3638,5721,8564,10327,79602	ABCD1,COMT,HMGCR,INSIG1,PSME2,KMO,AKR1A1,ADIPOR2
6_Member	GO Biological Processes	GO:0032787	monocarboxylic acid metabolic process	-3.45083	-0.818452	12/653	18,215,718,1382,1891,3638,6319,8564,10327,10965,79602,197257	ABAT,ABCD1,C3,CRABP2,ECH1,INSIG1,SCD,KMO,AKR1A1,ACOT2,ADIPOR2,LDHD
6_Member	GO Biological Processes	GO:0046394	carboxylic acid biosynthetic process	-2.86867	-0.409848	9/464	18,215,1382,3638,6319,8564,10057,10327,79602	ABAT,ABCD1,CRABP2,INSIG1,SCD,KMO,ABCC5,AKR1A1,ADIPOR2
6_Member	GO Biological Processes	GO:0016053	organic acid biosynthetic process	-2.86224	-0.409848	9/465	18,215,1382,3638,6319,8564,10057,10327,79602	ABAT,ABCD1,CRABP2,INSIG1,SCD,KMO,ABCC5,AKR1A1,ADIPOR2
6_Member	GO Biological Processes	GO:0072330	monocarboxylic acid biosynthetic process	-2.45003	-0.108972	7/344	18,215,1382,3638,6319,8564,79602	ABAT,ABCD1,CRABP2,INSIG1,SCD,KMO,ADIPOR2
6_Member	GO Biological Processes	GO:0010565	regulation of cellular ketone metabolic process	-2.42406	-0.108972	5/181	215,1312,3638,5721,79602	ABCD1,COMT,INSIG1,PSME2,ADIPOR2
6_Member	GO Biological Processes	GO:0042304	regulation of fatty acid biosynthetic process	-2.42306	-0.108972	3/55	215,3638,79602	ABCD1,INSIG1,ADIPOR2
6_Member	GO Biological Processes	GO:0006631	fatty acid metabolic process	-2.18733	0	7/385	215,718,1891,3638,6319,10965,79602	ABCD1,C3,ECH1,INSIG1,SCD,ACOT2,ADIPOR2
6_Member	GO Biological Processes	GO:0043574	peroxisomal transport	-2.14763	0	3/69	215,1891,10965	ABCD1,ECH1,ACOT2
6_Member	GO Biological Processes	GO:0007031	peroxisome organization	-1.9572	0	3/81	215,1891,10965	ABCD1,ECH1,ACOT2
6_Member	GO Biological Processes	GO:0006633	fatty acid biosynthetic process	-1.83514	0	4/165	215,3638,6319,79602	ABCD1,INSIG1,SCD,ADIPOR2
6_Member	GO Biological Processes	GO:0019217	regulation of fatty acid metabolic process	-1.75984	0	3/96	215,3638,79602	ABCD1,INSIG1,ADIPOR2
6_Member	GO Biological Processes	GO:0019395	fatty acid oxidation	-1.72463	0	3/99	215,1891,79602	ABCD1,ECH1,ADIPOR2
6_Member	GO Biological Processes	GO:0034440	lipid oxidation	-1.70184	0	3/101	215,1891,79602	ABCD1,ECH1,ADIPOR2
7_Summary	GO Biological Processes	GO:0016054	organic acid catabolic process	-3.7349	-1.0658	8/276	18,215,1891,8564,10327,23475,152926,197257,222,6817,10057,10809,11254,26154,51706,54020,57282,156	ABAT,ABCD1,ECH1,KMO,AKR1A1,QPRT,PPM1K,LDHD,ALDH3B2,SULT1A1,ABCC5,STARD10,SLC6A14,ABCA12,CYB5R1,SLC37A1,SLC4A10,GRK2
7_Member	GO Biological Processes	GO:0016054	organic acid catabolic process	-3.7349	-1.0658	8/276	18,215,1891,8564,10327,23475,152926,197257	ABAT,ABCD1,ECH1,KMO,AKR1A1,QPRT,PPM1K,LDHD
7_Member	GO Biological Processes	GO:0046395	carboxylic acid catabolic process	-3.7349	-1.0658	8/276	18,215,1891,8564,10327,23475,152926,197257	ABAT,ABCD1,ECH1,KMO,AKR1A1,QPRT,PPM1K,LDHD
7_Member	GO Biological Processes	GO:0044282	small molecule catabolic process	-3.60934	-0.952832	10/448	18,215,222,1891,6817,8564,10327,23475,152926,197257	ABAT,ABCD1,ALDH3B2,ECH1,SULT1A1,KMO,AKR1A1,QPRT,PPM1K,LDHD
7_Member	GO Biological Processes	GO:0015711	organic anion transport	-3.34495	-0.724158	10/484	18,215,8564,10057,10809,11254,26154,51706,54020,57282	ABAT,ABCD1,KMO,ABCC5,STARD10,SLC6A14,ABCA12,CYB5R1,SLC37A1,SLC4A10
7_Member	GO Biological Processes	GO:0072329	monocarboxylic acid catabolic process	-3.02309	-0.477801	5/132	18,215,1891,10327,197257	ABAT,ABCD1,ECH1,AKR1A1,LDHD
7_Member	GO Biological Processes	GO:0051954	positive regulation of amine transport	-2.99019	-0.477801	3/35	18,156,8564	ABAT,GRK2,KMO
7_Member	GO Biological Processes	GO:0006820	anion transport	-2.48258	-0.120852	10/632	18,215,8564,10057,10809,11254,26154,51706,54020,57282	ABAT,ABCD1,KMO,ABCC5,STARD10,SLC6A14,ABCA12,CYB5R1,SLC37A1,SLC4A10
7_Member	GO Biological Processes	GO:0051952	regulation of amine transport	-1.77186	0	3/95	18,156,8564	ABAT,GRK2,KMO
7_Member	GO Biological Processes	GO:0015837	amine transport	-1.69064	0	3/102	18,156,8564	ABAT,GRK2,KMO
7_Member	GO Biological Processes	GO:0046717	acid secretion	-1.47257	0	3/124	18,8564,10809	ABAT,KMO,STARD10
7_Member	GO Biological Processes	GO:0009063	cellular amino acid catabolic process	-1.46377	0	3/125	18,8564,152926	ABAT,KMO,PPM1K
7_Member	GO Biological Processes	GO:0015849	organic acid transport	-1.37712	0	5/334	18,215,8564,10809,11254	ABAT,ABCD1,KMO,STARD10,SLC6A14
7_Member	GO Biological Processes	GO:0046942	carboxylic acid transport	-1.37712	0	5/334	18,215,8564,10809,11254	ABAT,ABCD1,KMO,STARD10,SLC6A14
8_Summary	GO Biological Processes	GO:0051882	mitochondrial depolarization	-3.53629	-0.892014	3/23	215,10962,93974,429,1917,3156,6648,8564,9500,25803,18,3728,23542	ABCD1,MLLT11,ATP5IF1,ASCL1,EEF1A2,HMGCR,SOD2,KMO,MAGED1,SPDEF,ABAT,JUP,MAPK8IP2
8_Member	GO Biological Processes	GO:0051882	mitochondrial depolarization	-3.53629	-0.892014	3/23	215,10962,93974	ABCD1,MLLT11,ATP5IF1
8_Member	GO Biological Processes	GO:0051881	regulation of mitochondrial membrane potential	-2.09672	0	3/72	215,10962,93974	ABCD1,MLLT11,ATP5IF1
8_Member	GO Biological Processes	GO:0051899	membrane depolarization	-1.82145	0	3/91	215,10962,93974	ABCD1,MLLT11,ATP5IF1
8_Member	GO Biological Processes	GO:0010942	positive regulation of cell death	-1.62897	0	9/730	429,1917,3156,6648,8564,9500,10962,25803,93974	ASCL1,EEF1A2,HMGCR,SOD2,KMO,MAGED1,MLLT11,SPDEF,ATP5IF1
8_Member	GO Biological Processes	GO:0008637	apoptotic mitochondrial changes	-1.47257	0	3/124	6648,10962,93974	SOD2,MLLT11,ATP5IF1
8_Member	GO Biological Processes	GO:0042391	regulation of membrane potential	-1.42514	0	6/434	18,215,3728,10962,23542,93974	ABAT,ABCD1,JUP,MLLT11,MAPK8IP2,ATP5IF1
8_Member	GO Biological Processes	GO:0043065	positive regulation of apoptotic process	-1.42082	0	8/672	429,1917,3156,6648,9500,10962,25803,93974	ASCL1,EEF1A2,HMGCR,SOD2,MAGED1,MLLT11,SPDEF,ATP5IF1
8_Member	GO Biological Processes	GO:0043068	positive regulation of programmed cell death	-1.39552	0	8/680	429,1917,3156,6648,9500,10962,25803,93974	ASCL1,EEF1A2,HMGCR,SOD2,MAGED1,MLLT11,SPDEF,ATP5IF1
9_Summary	GO Biological Processes	GO:0046596	regulation of viral entry into host cell	-3.18859	-0.600017	3/30	7726,10475,10581,156,3693,2635,3123,10437,4277,7076	TRIM26,TRIM38,IFITM2,GRK2,ITGB5,GBP3,HLA-DRB1,IFI30,MICB,TIMP1
9_Member	GO Biological Processes	GO:0046596	regulation of viral entry into host cell	-3.18859	-0.600017	3/30	7726,10475,10581	TRIM26,TRIM38,IFITM2
9_Member	GO Biological Processes	GO:0046718	viral entry into host cell	-3.17734	-0.600017	5/122	156,3693,7726,10475,10581	GRK2,ITGB5,TRIM26,TRIM38,IFITM2
9_Member	GO Biological Processes	GO:0034341	response to interferon-gamma	-3.011	-0.477801	6/199	2635,3123,7726,10437,10475,10581	GBP3,HLA-DRB1,TRIM26,IFI30,TRIM38,IFITM2
9_Member	GO Biological Processes	GO:0030260	entry into host cell	-2.97941	-0.477801	5/135	156,3693,7726,10475,10581	GRK2,ITGB5,TRIM26,TRIM38,IFITM2
9_Member	GO Biological Processes	GO:0044409	entry into host	-2.97941	-0.477801	5/135	156,3693,7726,10475,10581	GRK2,ITGB5,TRIM26,TRIM38,IFITM2
9_Member	GO Biological Processes	GO:0051806	entry into cell of other organism involved in symbiotic interaction	-2.97941	-0.477801	5/135	156,3693,7726,10475,10581	GRK2,ITGB5,TRIM26,TRIM38,IFITM2
9_Member	GO Biological Processes	GO:0051828	entry into other organism involved in symbiotic interaction	-2.97941	-0.477801	5/135	156,3693,7726,10475,10581	GRK2,ITGB5,TRIM26,TRIM38,IFITM2
9_Member	GO Biological Processes	GO:0060333	interferon-gamma-mediated signaling pathway	-2.74298	-0.31326	4/91	3123,7726,10437,10475	HLA-DRB1,TRIM26,IFI30,TRIM38
9_Member	GO Biological Processes	GO:0043901	negative regulation of multi-organism process	-2.52944	-0.1417	5/171	4277,7076,7726,10475,10581	MICB,TIMP1,TRIM26,TRIM38,IFITM2
9_Member	GO Biological Processes	GO:0071346	cellular response to interferon-gamma	-2.43428	-0.108972	5/180	2635,3123,7726,10437,10475	GBP3,HLA-DRB1,TRIM26,IFI30,TRIM38
9_Member	GO Biological Processes	GO:0051701	interaction with host	-2.15429	0	5/210	156,3693,7726,10475,10581	GRK2,ITGB5,TRIM26,TRIM38,IFITM2
9_Member	GO Biological Processes	GO:0019079	viral genome replication	-1.49042	0	3/122	156,10475,10581	GRK2,TRIM38,IFITM2
9_Member	GO Biological Processes	GO:0019058	viral life cycle	-1.40055	0	5/329	156,3693,7726,10475,10581	GRK2,ITGB5,TRIM26,TRIM38,IFITM2
10_Summary	GO Biological Processes	GO:0097190	apoptotic signaling pathway	-3.18302	-0.600017	11/602	309,4582,6478,6648,9500,9531,9641,10962,23542,51246,93974	ANXA6,MUC1,SIAH2,SOD2,MAGED1,BAG3,IKBKE,MLLT11,MAPK8IP2,SHISA5,ATP5IF1
10_Member	GO Biological Processes	GO:0097190	apoptotic signaling pathway	-3.18302	-0.600017	11/602	309,4582,6478,6648,9500,9531,9641,10962,23542,51246,93974	ANXA6,MUC1,SIAH2,SOD2,MAGED1,BAG3,IKBKE,MLLT11,MAPK8IP2,SHISA5,ATP5IF1
10_Member	GO Biological Processes	GO:2001233	regulation of apoptotic signaling pathway	-2.06679	0	7/406	4582,6478,6648,9500,10962,23542,93974	MUC1,SIAH2,SOD2,MAGED1,MLLT11,MAPK8IP2,ATP5IF1
10_Member	GO Biological Processes	GO:0008630	intrinsic apoptotic signaling pathway in response to DNA damage	-1.66862	0	3/104	4582,9641,51246	MUC1,IKBKE,SHISA5
10_Member	GO Biological Processes	GO:0097193	intrinsic apoptotic signaling pathway	-1.60744	0	5/289	4582,6648,9641,10962,51246	MUC1,SOD2,IKBKE,MLLT11,SHISA5
10_Member	GO Biological Processes	GO:2001234	negative regulation of apoptotic signaling pathway	-1.37418	0	4/230	4582,6478,6648,23542	MUC1,SIAH2,SOD2,MAPK8IP2
11_Summary	GO Biological Processes	GO:1901616	organic hydroxy compound catabolic process	-3.0768	-0.509691	4/74	222,1312,6817,197257,18,5721,8564,2937,11254,152926,548596,1382,51109,23475,1717,3156,415116,10327,10809	ALDH3B2,COMT,SULT1A1,LDHD,ABAT,PSME2,KMO,GSS,SLC6A14,PPM1K,CKMT1A,CRABP2,RDH11,QPRT,DHCR7,HMGCR,PIM3,AKR1A1,STARD10
11_Member	GO Biological Processes	GO:1901616	organic hydroxy compound catabolic process	-3.0768	-0.509691	4/74	222,1312,6817,197257	ALDH3B2,COMT,SULT1A1,LDHD
11_Member	GO Biological Processes	GO:0009308	amine metabolic process	-2.92288	-0.435403	5/139	18,1312,5721,6817,8564	ABAT,COMT,PSME2,SULT1A1,KMO
11_Member	GO Biological Processes	GO:0006520	cellular amino acid metabolic process	-2.91998	-0.435403	8/367	18,1312,2937,5721,8564,11254,152926,548596	ABAT,COMT,GSS,PSME2,KMO,SLC6A14,PPM1K,CKMT1A
11_Member	GO Biological Processes	GO:0006584	catecholamine metabolic process	-2.44563	-0.108972	3/54	18,1312,6817	ABAT,COMT,SULT1A1
11_Member	GO Biological Processes	GO:0009712	catechol-containing compound metabolic process	-2.44563	-0.108972	3/54	18,1312,6817	ABAT,COMT,SULT1A1
11_Member	GO Biological Processes	GO:0034754	cellular hormone metabolic process	-2.19979	0	4/129	1312,1382,6817,51109	COMT,CRABP2,SULT1A1,RDH11
11_Member	GO Biological Processes	GO:0044106	cellular amine metabolic process	-2.1881	0	4/130	18,1312,5721,8564	ABAT,COMT,PSME2,KMO
11_Member	GO Biological Processes	GO:0042737	drug catabolic process	-2.05551	0	4/142	222,1312,6817,23475	ALDH3B2,COMT,SULT1A1,QPRT
11_Member	GO Biological Processes	GO:0042445	hormone metabolic process	-1.97853	0	5/232	1312,1382,1717,6817,51109	COMT,CRABP2,DHCR7,SULT1A1,RDH11
11_Member	GO Biological Processes	GO:0033238	regulation of cellular amine metabolic process	-1.9572	0	3/81	18,1312,5721	ABAT,COMT,PSME2
11_Member	GO Biological Processes	GO:0010817	regulation of hormone levels	-1.95518	0	8/532	18,1312,1382,1717,3156,6817,51109,415116	ABAT,COMT,CRABP2,DHCR7,HMGCR,SULT1A1,RDH11,PIM3
11_Member	GO Biological Processes	GO:0018958	phenol-containing compound metabolic process	-1.67957	0	3/103	18,1312,6817	ABAT,COMT,SULT1A1
11_Member	GO Biological Processes	GO:0097164	ammonium ion metabolic process	-1.51601	0	4/207	18,1312,10327,10809	ABAT,COMT,AKR1A1,STARD10
12_Summary	GO Biological Processes	GO:0002683	negative regulation of immune system process	-2.87512	-0.409848	9/463	1997,4277,6385,6778,10385,10475,10906,56477,79679,780,1312,1718,6648,6820,7031,9500,93974,149428,18,4582,215,718,6284,9641,3728	ELF1,MICB,SDC4,STAT6,BTN2A2,TRIM38,TRAFD1,CCL28,VTCN1,DDR1,COMT,DHCR24,SOD2,SULT2B1,TFF1,MAGED1,ATP5IF1,BNIPL,ABAT,MUC1,ABCD1,C3,S100A13,IKBKE,JUP
12_Member	GO Biological Processes	GO:0002683	negative regulation of immune system process	-2.87512	-0.409848	9/463	1997,4277,6385,6778,10385,10475,10906,56477,79679	ELF1,MICB,SDC4,STAT6,BTN2A2,TRIM38,TRAFD1,CCL28,VTCN1
12_Member	GO Biological Processes	GO:0008285	negative regulation of cell proliferation	-2.86691	-0.409848	12/762	780,1312,1718,6385,6648,6820,7031,9500,10385,79679,93974,149428	DDR1,COMT,DHCR24,SDC4,SOD2,SULT2B1,TFF1,MAGED1,BTN2A2,VTCN1,ATP5IF1,BNIPL
12_Member	GO Biological Processes	GO:0022408	negative regulation of cell-cell adhesion	-2.42406	-0.108972	5/181	18,6385,10385,56477,79679	ABAT,SDC4,BTN2A2,CCL28,VTCN1
12_Member	GO Biological Processes	GO:0042130	negative regulation of T cell proliferation	-2.33708	-0.0503182	3/59	6385,10385,79679	SDC4,BTN2A2,VTCN1
12_Member	GO Biological Processes	GO:0007162	negative regulation of cell adhesion	-2.20732	0	6/289	18,4582,6385,10385,56477,79679	ABAT,MUC1,SDC4,BTN2A2,CCL28,VTCN1
12_Member	GO Biological Processes	GO:1903038	negative regulation of leukocyte cell-cell adhesion	-2.19979	0	4/129	6385,10385,56477,79679	SDC4,BTN2A2,CCL28,VTCN1
12_Member	GO Biological Processes	GO:0032945	negative regulation of mononuclear cell proliferation	-2.08027	0	3/73	6385,10385,79679	SDC4,BTN2A2,VTCN1
12_Member	GO Biological Processes	GO:0050672	negative regulation of lymphocyte proliferation	-2.08027	0	3/73	6385,10385,79679	SDC4,BTN2A2,VTCN1
12_Member	GO Biological Processes	GO:0070664	negative regulation of leukocyte proliferation	-2.00167	0	3/78	6385,10385,79679	SDC4,BTN2A2,VTCN1
12_Member	GO Biological Processes	GO:0050868	negative regulation of T cell activation	-1.58525	0	3/112	6385,10385,79679	SDC4,BTN2A2,VTCN1
12_Member	GO Biological Processes	GO:0050866	negative regulation of cell activation	-1.57017	0	4/199	18,6385,10385,79679	ABAT,SDC4,BTN2A2,VTCN1
12_Member	GO Biological Processes	GO:0001816	cytokine production	-1.43441	0	9/792	215,718,1997,6284,6778,9641,10385,10475,79679	ABCD1,C3,ELF1,S100A13,STAT6,IKBKE,BTN2A2,TRIM38,VTCN1
12_Member	GO Biological Processes	GO:0030155	regulation of cell adhesion	-1.35543	0	8/693	18,780,3728,4582,6385,10385,56477,79679	ABAT,DDR1,JUP,MUC1,SDC4,BTN2A2,CCL28,VTCN1
13_Summary	GO Biological Processes	GO:0034308	primary alcohol metabolic process	-2.8522	-0.407496	4/85	222,6817,10327,51109,6648,18,3156,6778,11254	ALDH3B2,SULT1A1,AKR1A1,RDH11,SOD2,ABAT,HMGCR,STAT6,SLC6A14
13_Member	GO Biological Processes	GO:0034308	primary alcohol metabolic process	-2.8522	-0.407496	4/85	222,6817,10327,51109	ALDH3B2,SULT1A1,AKR1A1,RDH11
13_Member	GO Biological Processes	GO:1990748	cellular detoxification	-1.58525	0	3/112	6648,10327,51109	SOD2,AKR1A1,RDH11
13_Member	GO Biological Processes	GO:0009636	response to toxic substance	-1.51773	0	7/525	18,3156,6648,6778,10327,11254,51109	ABAT,HMGCR,SOD2,STAT6,AKR1A1,SLC6A14,RDH11
13_Member	GO Biological Processes	GO:0098754	detoxification	-1.41271	0	3/131	6648,10327,51109	SOD2,AKR1A1,RDH11
14_Summary	GO Biological Processes	GO:0008643	carbohydrate transport	-2.78941	-0.352266	5/149	718,53916,54020,55974,79602	C3,RAB4B,SLC37A1,SLC50A1,ADIPOR2
14_Member	GO Biological Processes	GO:0008643	carbohydrate transport	-2.78941	-0.352266	5/149	718,53916,54020,55974,79602	C3,RAB4B,SLC37A1,SLC50A1,ADIPOR2
14_Member	GO Biological Processes	GO:0008645	hexose transmembrane transport	-2.41642	-0.107941	4/112	718,53916,55974,79602	C3,RAB4B,SLC50A1,ADIPOR2
14_Member	GO Biological Processes	GO:0015749	monosaccharide transmembrane transport	-2.38903	-0.0915402	4/114	718,53916,55974,79602	C3,RAB4B,SLC50A1,ADIPOR2
14_Member	GO Biological Processes	GO:0034219	carbohydrate transmembrane transport	-2.36218	-0.0700869	4/116	718,53916,55974,79602	C3,RAB4B,SLC50A1,ADIPOR2
14_Member	GO Biological Processes	GO:1904659	glucose transmembrane transport	-1.61566	0	3/109	718,53916,79602	C3,RAB4B,ADIPOR2
15_Summary	GO Biological Processes	GO:0009615	response to virus	-2.57123	-0.163048	7/327	2635,4277,6773,8729,9641,10475,10581,57402,85236	GBP3,MICB,STAT2,GBF1,IKBKE,TRIM38,IFITM2,S100A14,H2BC12
15_Member	GO Biological Processes	GO:0009615	response to virus	-2.57123	-0.163048	7/327	2635,4277,6773,8729,9641,10475,10581	GBP3,MICB,STAT2,GBF1,IKBKE,TRIM38,IFITM2
15_Member	GO Biological Processes	GO:0051607	defense response to virus	-1.92694	0	5/239	2635,4277,6773,10475,10581	GBP3,MICB,STAT2,TRIM38,IFITM2
15_Member	GO Biological Processes	GO:0060337	type I interferon signaling pathway	-1.77186	0	3/95	6773,9641,10581	STAT2,IKBKE,IFITM2
15_Member	GO Biological Processes	GO:0071357	cellular response to type I interferon	-1.77186	0	3/95	6773,9641,10581	STAT2,IKBKE,IFITM2
15_Member	GO Biological Processes	GO:0034340	response to type I interferon	-1.72463	0	3/99	6773,9641,10581	STAT2,IKBKE,IFITM2
15_Member	GO Biological Processes	GO:0098542	defense response to other organism	-1.35213	0	7/571	2635,4277,6773,10475,10581,57402,85236	GBP3,MICB,STAT2,TRIM38,IFITM2,S100A14,H2BC12
16_Summary	GO Biological Processes	GO:0002253	activation of immune response	-2.53414	-0.1417	11/727	718,1997,3123,4277,4582,5721,9641,10385,57402,79679,200958,10906,85456,9531,1718,81617	C3,ELF1,HLA-DRB1,MICB,MUC1,PSME2,IKBKE,BTN2A2,S100A14,VTCN1,MUC20,TRAFD1,TNKS1BP1,BAG3,DHCR24,CAB39L
16_Member	GO Biological Processes	GO:0002253	activation of immune response	-2.53414	-0.1417	11/727	718,1997,3123,4277,4582,5721,9641,10385,57402,79679,200958	C3,ELF1,HLA-DRB1,MICB,MUC1,PSME2,IKBKE,BTN2A2,S100A14,VTCN1,MUC20
16_Member	GO Biological Processes	GO:0002757	immune response-activating signal transduction	-2.42506	-0.108972	10/644	1997,3123,4277,4582,5721,9641,10385,57402,79679,200958	ELF1,HLA-DRB1,MICB,MUC1,PSME2,IKBKE,BTN2A2,S100A14,VTCN1,MUC20
16_Member	GO Biological Processes	GO:0002764	immune response-regulating signaling pathway	-2.27016	-0.0140614	10/678	1997,3123,4277,4582,5721,9641,10385,57402,79679,200958	ELF1,HLA-DRB1,MICB,MUC1,PSME2,IKBKE,BTN2A2,S100A14,VTCN1,MUC20
16_Member	GO Biological Processes	GO:0002429	immune response-activating cell surface receptor signaling pathway	-2.24682	-0.000488271	8/473	1997,3123,4277,4582,5721,10385,79679,200958	ELF1,HLA-DRB1,MICB,MUC1,PSME2,BTN2A2,VTCN1,MUC20
16_Member	GO Biological Processes	GO:0050852	T cell receptor signaling pathway	-2.22395	0	5/202	1997,3123,5721,10385,79679	ELF1,HLA-DRB1,PSME2,BTN2A2,VTCN1
16_Member	GO Biological Processes	GO:0002768	immune response-regulating cell surface receptor signaling pathway	-2.07778	0	8/506	1997,3123,4277,4582,5721,10385,79679,200958	ELF1,HLA-DRB1,MICB,MUC1,PSME2,BTN2A2,VTCN1,MUC20
16_Member	GO Biological Processes	GO:0045088	regulation of innate immune response	-1.82076	0	7/454	4277,4582,5721,9641,10906,57402,200958	MICB,MUC1,PSME2,IKBKE,TRAFD1,S100A14,MUC20
16_Member	GO Biological Processes	GO:2000045	regulation of G1/S transition of mitotic cell cycle	-1.67955	0	4/184	4582,5721,10385,85456	MUC1,PSME2,BTN2A2,TNKS1BP1
16_Member	GO Biological Processes	GO:0045089	positive regulation of innate immune response	-1.6483	0	6/384	4277,4582,5721,9641,57402,200958	MICB,MUC1,PSME2,IKBKE,S100A14,MUC20
16_Member	GO Biological Processes	GO:0002223	stimulatory C-type lectin receptor signaling pathway	-1.57532	0	3/113	4582,5721,200958	MUC1,PSME2,MUC20
16_Member	GO Biological Processes	GO:1902806	regulation of cell cycle G1/S phase transition	-1.54954	0	4/202	4582,5721,10385,85456	MUC1,PSME2,BTN2A2,TNKS1BP1
16_Member	GO Biological Processes	GO:0002220	innate immune response activating cell surface receptor signaling pathway	-1.54615	0	3/116	4582,5721,200958	MUC1,PSME2,MUC20
16_Member	GO Biological Processes	GO:0002758	innate immune response-activating signal transduction	-1.54147	0	5/301	4582,5721,9641,57402,200958	MUC1,PSME2,IKBKE,S100A14,MUC20
16_Member	GO Biological Processes	GO:0031349	positive regulation of defense response	-1.52157	0	7/524	718,4277,4582,5721,9641,57402,200958	C3,MICB,MUC1,PSME2,IKBKE,S100A14,MUC20
16_Member	GO Biological Processes	GO:0043618	regulation of transcription from RNA polymerase II promoter in response to stress	-1.49948	0	3/121	4582,5721,9531	MUC1,PSME2,BAG3
16_Member	GO Biological Processes	GO:0050851	antigen receptor-mediated signaling pathway	-1.46385	0	5/316	1997,3123,5721,10385,79679	ELF1,HLA-DRB1,PSME2,BTN2A2,VTCN1
16_Member	GO Biological Processes	GO:2000134	negative regulation of G1/S transition of mitotic cell cycle	-1.46377	0	3/125	4582,10385,85456	MUC1,BTN2A2,TNKS1BP1
16_Member	GO Biological Processes	GO:0043620	regulation of DNA-templated transcription in response to stress	-1.44643	0	3/127	4582,5721,9531	MUC1,PSME2,BAG3
16_Member	GO Biological Processes	GO:0002218	activation of innate immune response	-1.4342	0	5/322	4582,5721,9641,57402,200958	MUC1,PSME2,IKBKE,S100A14,MUC20
16_Member	GO Biological Processes	GO:1902807	negative regulation of cell cycle G1/S phase transition	-1.41271	0	3/131	4582,10385,85456	MUC1,BTN2A2,TNKS1BP1
16_Member	GO Biological Processes	GO:0007050	cell cycle arrest	-1.32912	0	4/238	1718,4582,81617,85456	DHCR24,MUC1,CAB39L,TNKS1BP1
17_Summary	GO Biological Processes	GO:0001954	positive regulation of cell-matrix adhesion	-2.5162	-0.1417	3/51	3728,6385,56477,780,3693,3913	JUP,SDC4,CCL28,DDR1,ITGB5,LAMB2
17_Member	GO Biological Processes	GO:0001954	positive regulation of cell-matrix adhesion	-2.5162	-0.1417	3/51	3728,6385,56477	JUP,SDC4,CCL28
17_Member	GO Biological Processes	GO:0001952	regulation of cell-matrix adhesion	-2.32289	-0.0413936	4/119	780,3728,6385,56477	DDR1,JUP,SDC4,CCL28
17_Member	GO Biological Processes	GO:0007160	cell-matrix adhesion	-2.02433	0	5/226	780,3693,3728,6385,56477	DDR1,ITGB5,JUP,SDC4,CCL28
17_Member	GO Biological Processes	GO:0031589	cell-substrate adhesion	-1.79195	0	6/356	780,3693,3728,3913,6385,56477	DDR1,ITGB5,JUP,LAMB2,SDC4,CCL28
17_Member	GO Biological Processes	GO:0010811	positive regulation of cell-substrate adhesion	-1.49948	0	3/121	3728,6385,56477	JUP,SDC4,CCL28
17_Member	GO Biological Processes	GO:0010810	regulation of cell-substrate adhesion	-1.46446	0	4/215	780,3728,6385,56477	DDR1,JUP,SDC4,CCL28
18_Summary	GO Biological Processes	GO:0015748	organophosphate ester transport	-2.50211	-0.134038	4/106	215,10809,26154,54020,55974	ABCD1,STARD10,ABCA12,SLC37A1,SLC50A1
18_Member	GO Biological Processes	GO:0015748	organophosphate ester transport	-2.50211	-0.134038	4/106	215,10809,26154,54020	ABCD1,STARD10,ABCA12,SLC37A1
18_Member	GO Biological Processes	GO:1901264	carbohydrate derivative transport	-1.97181	0	3/80	215,54020,55974	ABCD1,SLC37A1,SLC50A1
19_Summary	GO Biological Processes	GO:0042752	regulation of circadian rhythm	-2.38903	-0.0915402	4/114	6097,6478,9500,25819,3638	RORC,SIAH2,MAGED1,NOCT,INSIG1
19_Member	GO Biological Processes	GO:0042752	regulation of circadian rhythm	-2.38903	-0.0915402	4/114	6097,6478,9500,25819	RORC,SIAH2,MAGED1,NOCT
19_Member	GO Biological Processes	GO:0032922	circadian regulation of gene expression	-2.27672	-0.0156597	3/62	6097,9500,25819	RORC,MAGED1,NOCT
19_Member	GO Biological Processes	GO:0007623	circadian rhythm	-1.50943	0	4/208	6097,6478,9500,25819	RORC,SIAH2,MAGED1,NOCT
19_Member	GO Biological Processes	GO:0045598	regulation of fat cell differentiation	-1.40448	0	3/132	3638,6097,25819	INSIG1,RORC,NOCT
20_Summary	GO Biological Processes	GO:0010035	response to inorganic substance	-2.31491	-0.0386094	9/562	18,429,1917,2937,6284,6648,6778,7031,140576	ABAT,ASCL1,EEF1A2,GSS,S100A13,SOD2,STAT6,TFF1,S100A16
20_Member	GO Biological Processes	GO:0010035	response to inorganic substance	-2.31491	-0.0386094	9/562	18,429,1917,2937,6284,6648,6778,7031,140576	ABAT,ASCL1,EEF1A2,GSS,S100A13,SOD2,STAT6,TFF1,S100A16
20_Member	GO Biological Processes	GO:0010038	response to metal ion	-1.74936	0	6/364	18,429,2937,6284,7031,140576	ABAT,ASCL1,GSS,S100A13,TFF1,S100A16
