# Supplementary material
Source: Preprints.org preprint supplement (doi:10.20944/preprints202004.0323.v1)
Supplement: Supplementary file 1 [file supplementary › Supplementary_Table_6_Isoform_level_DESeq2_differential_analysis.xlsx]

## Sheet: Foglio1
					Average transcript length						Transcript normalized read counts						Transcript TPM units
	Ensembl annotation				Control LNA			DSCAM-AS1 LNA			Control LNA			DSCAM-AS1 LNA			Control LNA			DSCAM-AS1 LNA			Isoform level DE analysis RSEM-DESeq2
Transcript id	Transcript name	Gene type	Gene name	Gene description	Replicate 1	Replicate 2	Replicate 3	Replicate 1	Replicate 2	Replicate 3	Replicate 1	Replicate 2	Replicate 3	Replicate 1	Replicate 2	Replicate 3	Replicate 1	Replicate 2	Replicate 3	Replicate 1	Replicate 2	Replicate 3	baseMean	log2FoldChange	lfcSE	stat	pvalue	padj
ENST00000444046.5	DSCAM-AS1-203	antisense_RNA	DSCAM-AS1	DSCAM antisense RNA 1 [Source:HGNC Symbol;Acc:HGNC:40197]	974.54	967.37	970.72	971.74	971.2	970.97	6464.97	6657.24	6382.55	2085.17	2056.88	1999.21	340.27	342.16	321.72	109.07	105.5	101.75	4274.34	-1.66792	0.0448096	-37.2224	2.95887e-303	7.10069e-299
ENST00000422749.5	DSCAM-AS1-201	antisense_RNA	DSCAM-AS1	DSCAM antisense RNA 1 [Source:HGNC Symbol;Acc:HGNC:40197]	1006.54	999.37	1002.72	1003.74	1003.2	1002.97	13780.6	15328.9	14295.6	4456.82	4267.73	4135.95	702.17	762.8	697.63	225.73	211.96	203.8	9377.6	-1.75506	0.0585826	-29.9587	3.39149e-197	4.06945e-193
ENST00000322611.3	BASP1-201	protein_coding	BASP1	brain abundant membrane attached signal protein 1 [Source:HGNC Symbol;Acc:HGNC:957]	1699.54	1692.37	1695.72	1696.74	1696.2	1695.97	1397.15	1343.49	1409.2	2403.35	2536.45	2533.68	42.11	39.52	40.67	71.99	74.5	73.84	1937.22	0.847702	0.059438	14.2619	3.7778e-46	3.02198e-42
ENST00000064778.8	FAM168A-201	protein_coding	FAM168A	family with sequence similarity 168 member A [Source:HGNC Symbol;Acc:HGNC:28999]	7117.54	7110.37	7113.72	7114.74	7114.2	7113.97	3053.62	3105.15	3067.8	1848.12	1691.05	1728.87	21.94	21.79	21.11	13.19	11.84	12.01	2415.77	-0.807774	0.0575231	-14.0426	8.55118e-45	5.13028e-41
ENST00000330909.12	MAGI1-201	protein_coding	MAGI1	membrane associated guanylate kinase, WW and PDZ domain containing 1 [Source:HGNC Symbol;Acc:HGNC:946]	7236.54	7229.37	7232.72	7233.74	7233.2	7232.97	718.452	737.116	793.065	201.769	243.122	215.29	5.08	5.09	5.37	1.42	1.68	1.47	484.802	-1.7737	0.129611	-13.6848	1.251e-42	6.00429e-39
ENST00000395384.8	QPRT-202	protein_coding	QPRT	quinolinate phosphoribosyltransferase [Source:HGNC Symbol;Acc:HGNC:9755]	2164.54	2157.37	2160.72	2161.74	2161.2	2160.97	1894.66	1708.47	1761.83	3187.92	2955.18	3242.57	44.8	39.46	39.91	74.95	68.11	74.16	2458.44	0.807253	0.0728127	11.0867	1.45553e-28	5.82164e-25
ENST00000398571.6	USP34-201	protein_coding	USP34	ubiquitin specific peptidase 34 [Source:HGNC Symbol;Acc:HGNC:20066]	11178.5	11171.4	11174.7	11175.7	11175.2	11175	3430.89	3731.11	3778.9	2183.04	2094.91	2269.13	15.69	16.66	16.55	9.92	9.34	10.04	2914.66	-0.739306	0.067526	-10.9485	6.75842e-28	2.31698e-24
ENST00000312960.3	SIAH2-201	protein_coding	SIAH2	siah E3 ubiquitin protein ligase 2 [Source:HGNC Symbol;Acc:HGNC:10858]	2338.54	2331.37	2334.72	2335.74	2335.2	2334.97	2996.96	3083.66	3063.95	4042.13	4091.08	4011.24	65.6	65.92	64.23	87.94	87.26	84.91	3548.17	0.409073	0.0400711	10.2087	1.81314e-24	5.43895e-21
ENST00000455354.1	DSCAM-AS1-204	antisense_RNA	DSCAM-AS1	DSCAM antisense RNA 1 [Source:HGNC Symbol;Acc:HGNC:40197]	1103.54	1096.37	1099.72	1100.74	1100.2	1099.97	2169.27	2354.47	2040.49	911.796	783.326	640.198	100.79	106.81	90.78	42.1	35.47	28.76	1483.26	-1.49247	0.150193	-9.93703	2.87277e-23	7.66008e-20
ENST00000376228.9	HLA-C-201	protein_coding	HLA-C	major histocompatibility complex, class I, C [Source:HGNC Symbol;Acc:HGNC:4933]	1357.54	1350.37	1353.72	1354.74	1354.2	1353.97	3974.12	3854.23	3564.15	6626.81	6324.81	5833.71	149.99	142.09	128.85	248.64	232.67	212.93	5029.64	0.721345	0.0738971	9.76149	1.6472e-22	3.95296e-19
ENST00000340855.10	IDS-201	protein_coding	IDS	iduronate 2-sulfatase [Source:HGNC Symbol;Acc:HGNC:5389]	7440.54	7433.37	7436.72	7437.74	7437.2	7436.97	1286.61	1453.92	1439.88	671.85	630.768	541.09	8.84	9.76	9.48	4.59	4.22	3.6	1004.02	-1.18346	0.121914	-9.70733	2.80582e-22	6.12127e-19
ENST00000344616.3	S100A14-201	protein_coding	S100A14	S100 calcium binding protein A14 [Source:HGNC Symbol;Acc:HGNC:18901]	879.54	872.37	875.72	876.74	876.2	875.97	1431.95	1631.35	1631.02	2683.49	2952.25	2677.11	83.52	92.95	91.12	155.61	167.84	151.03	2167.86	0.823986	0.0868824	9.48393	2.4489e-21	4.89739e-18
ENST00000518448.5	FAM83A-202	protein_coding	FAM83A	family with sequence similarity 83 member A [Source:HGNC Symbol;Acc:HGNC:28210]	5214.54	5207.37	5210.72	5211.74	5211.2	5210.97	549.25	479.108	511.449	998.079	930.613	1033.07	5.39	4.59	4.81	9.73	8.89	9.8	750.262	0.943818	0.103802	9.09247	9.68102e-20	1.78712e-16
ENST00000466323.5	IDS-206	protein_coding	IDS	iduronate 2-sulfatase [Source:HGNC Symbol;Acc:HGNC:5389]	1350.54	1343.37	1346.72	1347.74	1347.2	1346.97	143.749	186.388	145.442	26.8204	22.96	21.2849	5.46	6.89	5.29	1.01	0.84	0.78	91.1073	-2.7446	0.312732	-8.77619	1.69104e-18	2.89869e-15
ENST00000341776.6	JARID2-201	protein_coding	JARID2	jumonji and AT-rich interaction domain containing 2 [Source:HGNC Symbol;Acc:HGNC:6196]	5576.54	5569.37	5572.72	5573.74	5573.2	5572.97	2605.92	2702.04	2517.96	1854.51	1880.14	1860.67	23.89	24.21	22.12	16.91	16.81	16.5	2236.87	-0.483446	0.0553895	-8.72813	2.58922e-18	4.14241e-15
ENST00000327569.7	ATP11C-201	protein_coding	ATP11C	ATPase phospholipid transporting 11C [Source:HGNC Symbol;Acc:HGNC:13554]	5936.54	5929.37	5932.72	5933.74	5933.2	5932.97	1361.61	1503.7	1566.93	841.404	721.26	801.406	11.73	12.65	12.93	7.2	6.05	6.67	1132.72	-0.904767	0.105243	-8.59692	8.18828e-18	1.22814e-14
ENST00000598581.2	SLC6A14-202	protein_coding	SLC6A14	solute carrier family 6 member 14 [Source:HGNC Symbol;Acc:HGNC:11047]	4341.54	4334.37	4337.72	4338.74	4338.2	4337.97	5684.07	6012.82	6160.04	8976.04	8399.79	8089.43	66.97	69.18	69.51	105.12	96.45	92.17	7220.37	0.511851	0.0600342	8.526	1.51501e-17	2.13866e-14
ENST00000339145.8	IFI6-201	protein_coding	IFI6	interferon alpha inducible protein 6 [Source:HGNC Symbol;Acc:HGNC:4054]	643.56	636.38	639.73	640.75	640.21	639.98	2068.22	2266.18	1912.21	3353.98	3261.37	3328.14	165.15	176.76	146.26	266.22	253.77	257.01	2698.35	0.672148	0.0792966	8.47638	2.32311e-17	3.09722e-14
ENST00000434618.6	TAPBP-234	protein_coding	TAPBP	TAP binding protein [Source:HGNC Symbol;Acc:HGNC:11566]	3580.54	3573.37	3576.72	3577.74	3577.2	3576.97	6505.84	6197.73	6495.28	8045.34	8301.15	8579.82	92.96	86.48	88.89	114.27	115.6	118.55	7354.19	0.376579	0.0446099	8.4416	3.1302e-17	3.95361e-14
ENST00000196371.9	OXCT1-201	protein_coding	OXCT1	3-oxoacid CoA-transferase 1 [Source:HGNC Symbol;Acc:HGNC:8527]	3209.54	3202.37	3205.72	3206.74	3206.2	3205.97	951.401	946.238	1111.53	540.852	529.456	518.999	15.17	14.73	16.97	8.56	8.23	8	766.413	-0.922572	0.111882	-8.24594	1.6386e-16	1.96616e-13
ENST00000359175.8	SPTSSB-201	protein_coding	SPTSSB	serine palmitoyltransferase small subunit B [Source:HGNC Symbol;Acc:HGNC:24045]	2924.54	2917.37	2920.72	2921.74	2921.2	2920.97	7723.07	8926.55	8504.57	12498.4	12554.3	11751.2	135.13	152.53	142.51	217.39	214.1	198.84	10326.3	0.549099	0.0669973	8.19584	2.48851e-16	2.84377e-13
ENST00000397728.7	LSS-202	protein_coding	LSS	lanosterol synthase [Source:HGNC Symbol;Acc:HGNC:6708]	4757.54	4750.37	4753.72	4754.74	4754.2	4753.97	3139.65	2687.7	3149.78	4840.09	4735.44	5314.35	33.75	28.22	32.43	51.72	49.62	55.25	3977.84	0.729792	0.0894672	8.15709	3.43199e-16	3.74367e-13
ENST00000285039.11	MYO5B-201	protein_coding	MYO5B	myosin VB [Source:HGNC Symbol;Acc:HGNC:7603]	9326.54	9319.37	9322.72	9323.74	9323.2	9322.97	1989.15	1967.67	2036.54	1300.79	1308.81	1431.71	10.91	10.54	10.69	7.09	6.99	7.59	1672.45	-0.566518	0.0699263	-8.10165	5.42196e-16	5.65723e-13
ENST00000412585.6	HLA-B-249	protein_coding	HLA-B	major histocompatibility complex, class I, B [Source:HGNC Symbol;Acc:HGNC:4932]	1368.54	1361.37	1364.72	1365.74	1365.2	1364.97	1664.33	1799.43	1568.09	3840.71	3398.08	2888.2	62.31	65.81	56.24	142.93	123.98	104.57	2526.47	1.00908	0.125212	8.05896	7.6949e-16	7.69425e-13
ENST00000577716.5	RNF43-203	protein_coding	RNF43	ring finger protein 43 [Source:HGNC Symbol;Acc:HGNC:18505]	4188.54	4181.37	4184.72	4185.74	4185.2	4184.97	141.315	119.516	162.129	363.805	418.706	433.86	1.72	1.42	1.89	4.42	4.98	5.13	273.222	1.51914	0.189108	8.03321	9.49583e-16	9.11524e-13
ENST00000637935.1	PLCB1-234	protein_coding	PLCB1	phospholipase C beta 1 [Source:HGNC Symbol;Acc:HGNC:15917]	3137.54	3130.37	3133.72	3134.74	3134.2	3133.97	364.814	321.436	369.397	140.578	126.961	150.624	5.95	5.12	5.77	2.28	2.01	2.38	245.635	-1.33093	0.166668	-7.98548	1.39977e-15	1.29198e-12
ENST00000448301.6	CTSS-202	protein_coding	CTSS	cathepsin S [Source:HGNC Symbol;Acc:HGNC:2545]	1242.54	1235.37	1238.72	1239.74	1239.2	1238.97	41.9545	41.8063	48.4817	155.552	174.225	161.276	1.73	1.67	1.92	6.4	6.99	6.44	103.882	1.88686	0.237932	7.93025	2.18712e-15	1.94395e-12
ENST00000368706.8	S100A16-204	protein_coding	S100A16	S100 calcium binding protein A16 [Source:HGNC Symbol;Acc:HGNC:20441]	939.54	932.37	935.72	936.74	936.2	935.97	917.711	891.228	916.224	1354.68	1536.91	1553.86	50.1	47.55	47.89	73.53	81.8	82.06	1195.1	0.705705	0.0890998	7.9204	2.36757e-15	2.02918e-12
ENST00000314289.12	RNF4-201	protein_coding	RNF4	ring finger protein 4 [Source:HGNC Symbol;Acc:HGNC:10067]	2909.54	2902.37	2905.72	2906.74	2906.2	2905.97	2076.04	2145.36	2131.16	1520.58	1541.09	1413.75	36.52	36.84	35.9	26.59	26.43	24.04	1804.66	-0.507445	0.0646238	-7.85229	4.08515e-15	3.38053e-12
ENST00000252593.6	BST2-201	protein_coding	BST2	bone marrow stromal cell antigen 2 [Source:HGNC Symbol;Acc:HGNC:1119]	840.54	833.37	836.72	837.74	837.2	836.97	3653.2	3670.69	3621.59	4479.84	4705.21	4510.19	223.07	218.91	211.81	271.89	279.97	266.29	4106.79	0.322561	0.0415438	7.76435	8.2065e-15	6.56466e-12
ENST00000354258.4	TAP1-201	protein_coding	TAP1	transporter 1, ATP binding cassette subfamily B member [Source:HGNC Symbol;Acc:HGNC:43]	2780.54	2773.37	2776.72	2777.74	2777.2	2776.97	2944.03	3030.99	2787.24	4553.1	4844.77	4118.45	54.18	54.47	49.13	83.31	86.91	73.3	3713.1	0.624744	0.0806963	7.74191	9.79311e-15	7.58113e-12
ENST00000285420.8	OTUD6B-201	protein_coding	OTUD6B	OTU domain containing 6B [Source:HGNC Symbol;Acc:HGNC:24281]	3119.54	3112.37	3115.72	3116.74	3116.2	3115.97	1080.13	1663.59	1423.27	343.396	175.585	144.894	17.71	26.65	22.36	5.6	2.81	2.29	805.143	-2.65064	0.344111	-7.70288	1.33038e-14	9.97701e-12
ENST00000427451.5	DSCAM-AS1-202	antisense_RNA	DSCAM-AS1	DSCAM antisense RNA 1 [Source:HGNC Symbol;Acc:HGNC:40197]	1461.54	1454.37	1457.72	1458.74	1458.2	1457.97	1462.77	1499.83	1110.85	580.416	594.263	472.359	51.26	51.33	37.29	20.22	20.3	16.01	953.414	-1.30815	0.170464	-7.67408	1.66614e-14	1.21164e-11
ENST00000297875.6	SYTL5-201	protein_coding	SYTL5	synaptotagmin like 5 [Source:HGNC Symbol;Acc:HGNC:15589]	4543.54	4536.37	4539.72	4540.74	4540.2	4539.97	6006.28	6834.49	6671.48	4327.07	4164.11	3636.23	67.62	75.14	71.93	48.43	45.69	39.58	5273.28	-0.686665	0.0900765	-7.62314	2.47586e-14	1.74752e-11
ENST00000497137.1	SPTSSB-202	protein_coding	SPTSSB	serine palmitoyltransferase small subunit B [Source:HGNC Symbol;Acc:HGNC:24045]	701.55	694.38	697.73	698.74	698.2	697.97	847.079	878.843	857.814	1224.61	1316.73	1252.65	62.01	62.81	60.16	89.16	93.92	88.68	1062.95	0.553603	0.0736309	7.51862	5.53554e-14	3.79548e-11
ENST00000395290.6	CELF1-204	protein_coding	CELF1	CUGBP Elav-like family member 1 [Source:HGNC Symbol;Acc:HGNC:2549]	7487.54	7480.37	7483.72	7484.74	7484.2	7483.97	2645.7	2591.13	2588.95	2015.55	1847.73	1942.52	18.07	17.28	16.93	13.68	12.29	12.83	2271.93	-0.429537	0.0575185	-7.46781	8.15414e-14	5.43564e-11
ENST00000228928.11	OAS3-201	protein_coding	OAS3	2'-5'-oligoadenylate synthetase 3 [Source:HGNC Symbol;Acc:HGNC:8088]	6540.54	6533.37	6536.72	6537.74	6537.2	6536.97	23725.6	22866.5	21678.6	30138.4	29947.2	28074.5	185.5	174.6	162.33	234.24	228.2	212.27	26071.8	0.368756	0.0503984	7.31682	2.53919e-13	1.6469e-10
ENST00000379389.4	ISG15-201	protein_coding	ISG15	ISG15 ubiquitin-like modifier [Source:HGNC Symbol;Acc:HGNC:4053]	532.58	525.4	528.76	529.77	529.23	529	17819.3	15871.4	16256.8	22632.4	23609.3	21629.3	1721.31	1497.21	1504.03	2173.18	2222.74	2020.38	19636.4	0.442087	0.0605274	7.30391	2.79525e-13	1.76527e-10
ENST00000290649.9	AMFR-201	protein_coding	AMFR	autocrine motility factor receptor [Source:HGNC Symbol;Acc:HGNC:463]	3421.54	3414.37	3417.72	3418.74	3418.2	3417.97	3964.14	3909.86	4069.18	4826.95	5117.64	5040.99	59.27	57.1	58.27	71.74	74.57	72.89	4488.13	0.326672	0.0451465	7.23582	4.62717e-13	2.84725e-10
ENST00000262776.7	LGALS3BP-201	protein_coding	LGALS3BP	galectin 3 binding protein [Source:HGNC Symbol;Acc:HGNC:6564]	2226.54	2219.37	2222.72	2223.74	2223.2	2222.97	10319.2	10183.8	9321.47	13762.6	14923.1	13163.5	237.25	228.66	205.25	314.53	334.4	292.66	11945.6	0.488486	0.0675665	7.22971	4.84011e-13	2.90383e-10
ENST00000511865.6	REEP5-206	protein_coding	REEP5	receptor accessory protein 5 [Source:HGNC Symbol;Acc:HGNC:30077]	1008.54	1001.37	1004.72	1005.74	1005.2	1004.97	207.853	150.382	139.603	439.783	579.386	586.172	10.56	7.49	6.79	22.21	28.69	28.84	350.53	1.68827	0.233766	7.22206	5.12069e-13	2.99723e-10
ENST00000379059.7	POLA1-201	protein_coding	POLA1	DNA polymerase alpha 1, catalytic subunit [Source:HGNC Symbol;Acc:HGNC:9173]	5261.54	5254.37	5257.72	5258.74	5258.2	5257.97	0	0	0	78.3439	310.654	120.334	0	0	0	0.75	2.94	1.13	84.8887	9.93015	1.38009	7.19531	6.23198e-13	3.56084e-10
ENST00000376759.7	RBM3-203	protein_coding	RBM3	RNA binding motif (RNP1, RRM) protein 3 [Source:HGNC Symbol;Acc:HGNC:9900]	1983.54	1976.37	1979.72	1980.74	1980.2	1979.97	2700.4	2788.84	2827.5	2149.19	2043.49	2158.72	69.71	70.3	69.9	55.15	51.4	53.88	2444.69	-0.38743	0.0539668	-7.17904	7.02038e-13	3.91802e-10
ENST00000262719.9	PHLPP1-201	protein_coding	PHLPP1	PH domain and leucine rich repeat protein phosphatase 1 [Source:HGNC Symbol;Acc:HGNC:20610]	6211.54	6204.37	6207.72	6208.74	6208.2	6207.97	425.848	436.22	432.889	241.475	235.018	240.667	3.51	3.51	3.41	1.98	1.89	1.92	335.353	-0.851184	0.119033	-7.1508	8.62726e-13	4.70539e-10
ENST00000484875.5	SULF2-211	protein_coding	SULF2	sulfatase 2 [Source:HGNC Symbol;Acc:HGNC:20392]	4059.54	4052.37	4055.72	4056.74	4056.2	4055.97	31410.5	31237.4	29541.8	24493.9	25100.7	22945.5	395.8	384.41	356.53	306.82	308.27	279.6	27455	-0.346045	0.0486558	-7.1121	1.14294e-12	6.09519e-10
ENST00000524141.5	SPIDR-225	protein_coding	SPIDR	scaffolding protein involved in DNA repair [Source:HGNC Symbol;Acc:HGNC:28971]	2582.54	2575.37	2578.72	2579.74	2579.2	2578.97	416.576	390.335	349.349	131.987	155.324	175.184	8.25	7.55	6.63	2.6	2.99	3.36	269.792	-1.31749	0.185981	-7.08403	1.40026e-12	7.30512e-10
ENST00000398117.1	BCL2-202	protein_coding	BCL2	BCL2, apoptosis regulator [Source:HGNC Symbol;Acc:HGNC:990]	7282.54	7275.37	7278.72	7279.74	7279.2	7278.97	2513.25	2532.56	2628.23	1865.29	1682.95	1582.34	17.65	17.36	17.68	13.02	11.52	10.75	2134.1	-0.581863	0.083003	-7.01015	2.38068e-12	1.21557e-09
ENST00000373481.7	KIAA1522-203	protein_coding	KIAA1522	KIAA1522 [Source:HGNC Symbol;Acc:HGNC:29301]	5114.54	5107.37	5110.72	5111.74	5111.2	5110.97	5358.25	4930.94	4928.14	6417.74	6483.22	6624.92	53.58	48.15	47.2	63.79	63.18	64.07	5790.53	0.359662	0.0514893	6.98518	2.84499e-12	1.42238e-09
ENST00000246912.8	MLX-201	protein_coding	MLX	MLX, MAX dimerization protein [Source:HGNC Symbol;Acc:HGNC:11645]	2407.54	2400.37	2403.72	2404.74	2404.2	2403.97	55.4189	45.1301	64.3543	182.418	170.18	176.003	1.18	0.94	1.31	3.85	3.53	3.62	115.584	1.67196	0.240981	6.93813	3.9732e-12	1.9459e-09
ENST00000291527.2	TFF1-201	protein_coding	TFF1	trefoil factor 1 [Source:HGNC Symbol;Acc:HGNC:11755]	372.65	365.49	368.83	369.84	369.3	369.08	4550.33	5277.67	5070.64	7301.98	9460.25	8473.24	629.95	713.54	672.31	1004.86	1276.42	1134.34	6689.02	0.760218	0.109904	6.91713	4.60885e-12	2.21206e-09
ENST00000362020.4	IFI6-203	protein_coding	IFI6	interferon alpha inducible protein 6 [Source:HGNC Symbol;Acc:HGNC:4054]	649.55	642.38	645.73	646.75	646.21	645.98	5345.83	5328.62	4873.72	7285.96	7058.87	6649.7	422.87	411.66	369.27	572.97	544.19	508.71	6090.45	0.433226	0.0628362	6.89453	5.40421e-12	2.54295e-09
ENST00000368222.7	CRABP2-203	protein_coding	CRABP2	cellular retinoic acid binding protein 2 [Source:HGNC Symbol;Acc:HGNC:2339]	813.54	806.37	809.72	810.74	810.2	809.97	27470.1	26748.9	25590.6	35562.1	33083.5	32533.4	1733.14	1648.19	1546.34	2230.39	2034.34	1984.93	30164.8	0.34228	0.0497975	6.87345	6.26674e-12	2.8921e-09
ENST00000349264.10	B2M-201	protein_coding	B2M	beta-2-microglobulin [Source:HGNC Symbol;Acc:HGNC:914]	553.57	546.4	549.75	550.77	550.22	550	5952.86	6621.26	5966.26	9420.18	9308.59	8191.59	553.05	600.77	530.93	870.07	842.93	735.98	7576.79	0.537968	0.0784166	6.86039	6.86746e-12	3.10953e-09
ENST00000458420.7	CLSTN2-201	protein_coding	CLSTN2	calsyntenin 2 [Source:HGNC Symbol;Acc:HGNC:17448]	14023.5	14016.4	14019.7	14020.7	14020.2	14020	487.729	490.161	557.388	252.222	237.721	282.412	1.78	1.74	1.95	0.91	0.85	1	384.606	-0.986866	0.144193	-6.84407	7.69751e-12	3.42083e-09
ENST00000463743.5	MYOF-205	protein_coding	MYOF	myoferlin [Source:HGNC Symbol;Acc:HGNC:3656]	4633.54	4626.37	4629.72	4630.74	4630.2	4629.97	2159.25	2337.13	2255.58	2933.02	3217.29	3037.01	23.83	25.19	23.85	32.18	34.62	32.42	2656.55	0.444114	0.0650201	6.83041	8.46703e-12	3.6944e-09
ENST00000284274.4	OTULIN-201	protein_coding	OTULIN	OTU deubiquitinase with linear linkage specificity [Source:HGNC Symbol;Acc:HGNC:25118]	7621.54	7614.37	7617.72	7618.74	7618.2	7617.97	1239.2	1310.77	1368.01	867.182	919.813	842.332	8.32	8.59	8.79	5.78	6.01	5.47	1091.22	-0.577942	0.084825	-6.81334	9.53588e-12	4.08646e-09
ENST00000247191.6	DLGAP5-201	protein_coding	DLGAP5	DLG associated protein 5 [Source:HGNC Symbol;Acc:HGNC:16864]	2794.54	2787.37	2790.72	2791.74	2791.2	2790.97	1392.9	1469.8	1487.64	968.997	804.985	786.689	25.5	26.29	26.09	17.64	14.37	13.93	1151.84	-0.764864	0.112473	-6.80044	1.04297e-11	4.39108e-09
ENST00000357402.9	MVP-201	protein_coding	MVP	major vault protein [Source:HGNC Symbol;Acc:HGNC:7531]	2691.54	2684.37	2687.72	2688.74	2688.2	2687.97	539.075	617.054	606.76	908.896	1038.65	1003.62	10.26	11.45	11.05	17.17	19.26	18.46	785.676	0.743647	0.110344	6.73934	1.59113e-11	6.58342e-09
ENST00000318445.10	SLCO3A1-201	protein_coding	SLCO3A1	solute carrier organic anion transporter family member 3A1 [Source:HGNC Symbol;Acc:HGNC:10952]	4936.54	4929.37	4932.72	4933.74	4933.2	4932.97	496.454	517.457	519.808	306.934	290.394	263.589	5.15	5.24	5.16	3.16	2.93	2.64	399.106	-0.836454	0.124453	-6.72107	1.80399e-11	7.33764e-09
ENST00000356956.5	IGF2R-201	protein_coding	IGF2R	insulin like growth factor 2 receptor [Source:HGNC Symbol;Acc:HGNC:5467]	13865.5	13858.4	13861.7	13862.7	13862.2	13862	4483.52	4649.22	4458.27	5364.29	5581.05	5622.87	16.53	16.74	15.74	19.66	20.05	20.05	5026.54	0.286452	0.0427212	6.70516	2.01184e-11	8.04667e-09
ENST00000392952.7	ABLIM1-206	protein_coding	ABLIM1	actin binding LIM protein 1 [Source:HGNC Symbol;Acc:HGNC:78]	6662.54	6655.37	6658.72	6659.74	6659.2	6658.97	344.449	385.481	384.417	199.621	189.095	190.732	2.65	2.89	2.83	1.52	1.42	1.41	282.299	-0.942515	0.141756	-6.64886	2.95381e-11	1.16206e-08
ENST00000389805.8	SQSTM1-202	protein_coding	SQSTM1	sequestosome 1 [Source:HGNC Symbol;Acc:HGNC:11280]	2807.54	2800.37	2803.72	2804.74	2804.2	2803.97	10885.8	10884.1	10935.8	13982.3	16722.4	17169.6	198.41	193.75	190.91	253.34	297.08	302.63	13430	0.549741	0.0829143	6.63023	3.35163e-11	1.2973e-08
ENST00000392322.7	STAT1-202	protein_coding	STAT1	signal transducer and activator of transcription 1 [Source:HGNC Symbol;Acc:HGNC:11362]	2537.54	2530.37	2533.72	2534.74	2534.2	2533.97	1275.62	1648.25	1425.81	2600.03	2417.65	2343.7	25.73	32.47	27.54	52.12	47.51	45.71	1951.84	0.760027	0.115639	6.57241	4.95076e-11	1.88585e-08
ENST00000359462.9	PCBP2-202	protein_coding	PCBP2	poly(rC) binding protein 2 [Source:HGNC Symbol;Acc:HGNC:8648]	1635.54	1628.37	1631.72	1632.74	1632.2	1631.97	106.296	129.844	178.032	405.559	877.895	785.894	3.33	3.96	5.33	12.63	26.78	23.79	413.92	2.3194	0.353783	6.55601	5.52662e-11	2.07231e-08
ENST00000371361.3	NOC3L-201	protein_coding	NOC3L	NOC3 like DNA replication regulator [Source:HGNC Symbol;Acc:HGNC:24034]	3276.54	3269.37	3272.72	3273.74	3273.2	3272.97	1009.54	1117.64	1198.45	706.115	611.846	608.227	15.76	17.05	17.92	10.96	9.31	9.18	875.303	-0.788098	0.120591	-6.53527	6.3493e-11	2.34416e-08
ENST00000268251.12	ABAT-201	protein_coding	ABAT	4-aminobutyrate aminotransferase [Source:HGNC Symbol;Acc:HGNC:23]	4657.54	4650.37	4653.72	4654.74	4654.2	4653.97	6537.71	6334.91	6511.01	8087.54	7535.38	7977.26	71.8	67.94	68.49	88.29	80.66	84.72	7163.97	0.284364	0.0436699	6.51167	7.43209e-11	2.70235e-08
ENST00000262878.4	SAMHD1-201	protein_coding	SAMHD1	SAM and HD domain containing deoxynucleoside triphosphate triphosphohydrolase 1 [Source:HGNC Symbol;Acc:HGNC:15925]	4605.54	4598.37	4601.72	4602.74	4602.2	4601.97	4502.74	4793.79	4501.13	6549.65	6348.14	5771.14	50	51.99	47.87	72.31	68.72	61.98	5411.1	0.435988	0.0670247	6.50489	7.77526e-11	2.78493e-08
ENST00000374897.2	TAP2-201	protein_coding	TAP2	transporter 2, ATP binding cassette subfamily B member [Source:HGNC Symbol;Acc:HGNC:44]	5505.54	5498.37	5501.72	5502.74	5502.2	5501.97	2426.09	2378.54	2431.88	2987.82	3103.85	2937.13	22.53	21.58	21.63	27.59	28.11	26.39	2710.88	0.31745	0.0490146	6.47664	9.3786e-11	3.27325e-08
ENST00000409261.5	NCKAP5-205	protein_coding	NCKAP5	NCK associated protein 5 [Source:HGNC Symbol;Acc:HGNC:29847]	7415.54	7408.37	7411.72	7412.74	7412.2	7411.97	293.468	288.531	335.945	55.8086	101.301	99.0497	2.02	1.94	2.22	0.38	0.68	0.66	195.684	-1.84249	0.284506	-6.47612	9.41139e-11	3.27325e-08
ENST00000319420.3	SHISA2-201	protein_coding	SHISA2	shisa family member 2 [Source:HGNC Symbol;Acc:HGNC:20366]	2681.54	2674.37	2677.72	2678.74	2678.2	2677.97	2391.41	2754.76	2702.84	1645.03	1861.19	1736.28	45.64	51.34	49.4	31.21	34.62	32.04	2181.92	-0.582812	0.090095	-6.46887	9.87411e-11	3.33878e-08
ENST00000355499.8	YY1AP1-205	protein_coding	YY1AP1	YY1 associated protein 1 [Source:HGNC Symbol;Acc:HGNC:30935]	2484.54	2477.37	2480.72	2481.74	2481.2	2480.97	305.712	455.793	350.186	85.8444	136.415	107.239	6.29	9.17	6.92	1.77	2.75	2.14	240.198	-1.75839	0.271826	-6.46881	9.87805e-11	3.33878e-08
ENST00000272895.11	ABCA12-201	protein_coding	ABCA12	ATP binding cassette subfamily A member 12 [Source:HGNC Symbol;Acc:HGNC:14637]	8921.54	8914.37	8917.72	8918.74	8918.2	8917.97	2533.15	2781.38	2488.65	4390.7	4164.16	3587.06	14.52	15.57	13.66	25.01	23.26	19.88	3324.18	0.637715	0.0988925	6.44857	1.12909e-10	3.76331e-08
ENST00000371817.7	COL5A1-201	protein_coding	COL5A1	collagen type V alpha 1 chain [Source:HGNC Symbol;Acc:HGNC:2209]	8292.54	8285.37	8288.72	8289.74	8289.2	8288.97	1735.84	1740.11	1629.58	1240.68	1104.86	1223.79	10.7	10.48	9.63	7.61	6.64	7.3	1445.81	-0.513702	0.0803245	-6.39534	1.60194e-10	5.2662e-08
ENST00000306085.10	TRIM56-201	protein_coding	TRIM56	tripartite motif containing 56 [Source:HGNC Symbol;Acc:HGNC:19028]	10773.5	10766.4	10769.7	10770.7	10770.2	10770	5781.63	6035.66	5620.72	7170.53	7162.69	6918.71	27.44	27.97	25.54	33.82	33.13	31.75	6448.32	0.285544	0.0447136	6.38607	1.70206e-10	5.51974e-08
ENST00000519141.5	SPIDR-209	protein_coding	SPIDR	scaffolding protein involved in DNA repair [Source:HGNC Symbol;Acc:HGNC:28971]	1520.54	1513.37	1516.72	1517.74	1517.2	1516.97	305.442	280.061	269.978	131.964	133.709	145.719	10.28	9.22	8.71	4.44	4.39	4.73	211.145	-1.05253	0.16487	-6.384	1.72526e-10	5.52037e-08
ENST00000340058.5	RET-201	protein_coding	RET	ret proto-oncogene [Source:HGNC Symbol;Acc:HGNC:9967]	3970.54	3963.37	3966.72	3967.74	3967.2	3966.97	1022.25	1209.88	1042.98	501.166	659.123	537.004	13.17	15.22	12.86	6.42	8.28	6.69	828.734	-0.950502	0.148958	-6.38101	1.75922e-10	5.55498e-08
ENST00000398598.7	MX1-202	protein_coding	MX1	MX dynamin like GTPase 1 [Source:HGNC Symbol;Acc:HGNC:7532]	2671.54	2664.37	2667.72	2668.74	2668.2	2667.97	5271.8	4977.09	4783.88	7375.24	7284.02	6406.49	100.99	93.11	87.77	140.44	135.98	118.68	6016.42	0.486276	0.0763441	6.36954	1.89601e-10	5.90916e-08
ENST00000215794.7	USP18-201	protein_coding	USP18	ubiquitin specific peptidase 18 [Source:HGNC Symbol;Acc:HGNC:12616]	1950.54	1943.37	1946.72	1947.74	1947.2	1946.97	1775.49	1794.58	1709.21	2627.72	2595.9	2292.16	46.6	45.99	42.97	68.57	66.42	58.18	2132.51	0.508601	0.0799225	6.36368	1.96982e-10	6.06047e-08
ENST00000561311.5	TLN2-209	protein_coding	TLN2	talin 2 [Source:HGNC Symbol;Acc:HGNC:15447]	11701.5	11694.4	11697.7	11698.7	11698.2	11698	564.665	555.545	545.692	300.518	274.19	342.988	2.47	2.37	2.28	1.3	1.17	1.45	430.6	-0.853436	0.134524	-6.34412	2.237e-10	6.79539e-08
ENST00000438323.2	IFI35-204	protein_coding	IFI35	interferon induced protein 35 [Source:HGNC Symbol;Acc:HGNC:5399]	1053.54	1046.37	1049.72	1050.74	1050.2	1049.97	750.343	691.873	645.342	1028.69	1129.06	1086.38	36.51	32.86	30.07	49.78	53.59	51.13	888.615	0.635621	0.100791	6.30634	2.85708e-10	8.57052e-08
ENST00000400337.6	COL18A1-204	protein_coding	COL18A1	collagen type XVIII alpha 1 chain [Source:HGNC Symbol;Acc:HGNC:2195]	5257.54	5250.37	5253.72	5254.74	5254.2	5253.97	6621.45	6023.2	5590	4348.62	4478.83	4332.02	64.41	57.22	52.08	42.05	42.46	40.75	5232.35	-0.470769	0.0749393	-6.282	3.34234e-10	9.90242e-08
ENST00000590986.5	SLC39A6-204	protein_coding	SLC39A6	solute carrier family 39 member 6 [Source:HGNC Symbol;Acc:HGNC:18607]	2824.54	2817.37	2820.72	2821.74	2821.2	2820.97	2760.8	2411.65	2328.4	3478.96	3700.77	3682.13	50.01	42.66	40.4	62.65	65.36	64.51	3060.45	0.533947	0.0850825	6.27564	3.48206e-10	1.01905e-07
ENST00000425042.6	HID1-202	protein_coding	HID1	HID1 domain containing [Source:HGNC Symbol;Acc:HGNC:15736]	3092.54	3085.37	3088.72	3089.74	3089.2	3088.97	1589.78	1575.63	1506.01	1975.6	2136.73	2136.58	26.3	25.46	23.86	32.49	34.46	34.19	1820.05	0.420181	0.0670219	6.26931	3.62662e-10	1.04858e-07
ENST00000392112.5	AFDN-206	protein_coding	AFDN	afadin, adherens junction formation factor [Source:HGNC Symbol;Acc:HGNC:7137]	7280.54	7273.37	7276.72	7277.74	7277.2	7276.97	1394.86	1544.11	1424.84	892.936	625.365	753.106	9.8	10.59	9.58	6.23	4.28	5.11	1105.87	-0.939937	0.150456	-6.24728	4.17673e-10	1.19325e-07
ENST00000379068.7	POLA1-202	protein_coding	POLA1	DNA polymerase alpha 1, catalytic subunit [Source:HGNC Symbol;Acc:HGNC:9173]	5307.54	5300.37	5303.72	5304.74	5304.2	5303.97	1399.98	1468.87	1536.02	979.836	752.324	860.347	13.49	13.82	14.18	9.39	7.07	8.02	1166.23	-0.763146	0.122528	-6.22835	4.71383e-10	1.33085e-07
ENST00000553384.5	RDH11-203	protein_coding	RDH11	retinol dehydrogenase 11 (all-trans/9-cis/11-cis) [Source:HGNC Symbol;Acc:HGNC:17964]	1747.54	1740.37	1743.72	1744.74	1744.2	1743.97	82.1899	75.6373	79.4028	179.18	197.19	179.281	2.41	2.17	2.24	5.23	5.65	5.07	132.147	1.22328	0.197327	6.19928	5.67235e-10	1.58285e-07
ENST00000367142.4	NUCKS1-201	protein_coding	NUCKS1	nuclear casein kinase and cyclin dependent kinase substrate 1 [Source:HGNC Symbol;Acc:HGNC:29923]	6317.54	6310.37	6313.72	6314.74	6314.2	6313.97	33066.2	34084.6	37536.7	27937.2	25191.5	25922.5	267.66	269.45	291.01	224.79	198.74	202.92	30623.1	-0.405229	0.0654291	-6.19341	5.88782e-10	1.62409e-07
ENST00000371269.7	DHCR24-201	protein_coding	DHCR24	24-dehydrocholesterol reductase [Source:HGNC Symbol;Acc:HGNC:2859]	4071.54	4064.37	4067.72	4068.74	4068.2	4067.97	8824.83	8102.5	8970.6	10825	11276.7	12090.8	110.87	99.41	107.94	135.2	138.08	146.89	10015.1	0.400797	0.0648174	6.18349	6.27009e-10	1.70988e-07
ENST00000428135.7	SNX13-203	protein_coding	SNX13	sorting nexin 13 [Source:HGNC Symbol;Acc:HGNC:21335]	6178.54	6171.37	6174.72	6175.74	6175.2	6174.97	987.679	1112.53	947.675	647.154	590.245	657.332	8.17	8.99	7.51	5.32	4.76	5.26	823.77	-0.682043	0.110706	-6.16087	7.23468e-10	1.95076e-07
ENST00000280551.10	SEC24D-201	protein_coding	SEC24D	SEC24 homolog D, COPII coat complex component [Source:HGNC Symbol;Acc:HGNC:10706]	3851.54	3844.37	3847.72	3848.74	3848.2	3847.97	1747.53	1780.48	1790.95	2197.82	2392.02	2405.06	23.21	23.09	22.78	29.02	30.96	30.89	2052.31	0.395291	0.0641848	6.15865	7.33678e-10	1.95631e-07
ENST00000381346.8	RDH11-201	protein_coding	RDH11	retinol dehydrogenase 11 (all-trans/9-cis/11-cis) [Source:HGNC Symbol;Acc:HGNC:17964]	2409.54	2402.37	2405.72	2406.74	2406.2	2405.97	2572.51	2672.83	2801.5	3463.79	3388.75	3341.61	54.64	55.45	57	73.13	70.17	68.64	3040.17	0.340732	0.0553802	6.1526	7.62249e-10	2.01016e-07
ENST00000324048.9	ZNF687-201	protein_coding	ZNF687	zinc finger protein 687 [Source:HGNC Symbol;Acc:HGNC:29277]	5199.54	5192.37	5195.72	5196.74	5196.2	5195.97	1342.71	1360.67	1384.76	1723.56	1826.11	1881.96	13.21	13.07	13.04	16.85	17.5	17.9	1586.63	0.410487	0.0668959	6.13621	8.4512e-10	2.20448e-07
ENST00000319170.9	RAPH1-202	protein_coding	RAPH1	Ras association (RalGDS/AF-6) and pleckstrin homology domains 1 [Source:HGNC Symbol;Acc:HGNC:14436]	9629.54	9622.37	9625.72	9626.74	9626.2	9625.97	1303.75	1426.71	1515.08	1961.93	2096.26	2208.56	6.92	7.4	7.7	10.35	10.85	11.34	1752.05	0.56217	0.0921212	6.1025	1.0442e-09	2.66581e-07
ENST00000371941.3	PREX1-201	protein_coding	PREX1	phosphatidylinositol-3,4,5-trisphosphate dependent Rac exchange factor 1 [Source:HGNC Symbol;Acc:HGNC:32594]	6457.54	6450.37	6453.72	6454.74	6454.2	6453.97	11706.6	11251.3	10792.9	8570.8	9383.15	8882.57	92.7	87.02	81.86	67.47	72.42	68.02	10097.9	-0.331058	0.054247	-6.10279	1.04236e-09	2.66581e-07
ENST00000349015.7	ALDH3B2-201	protein_coding	ALDH3B2	aldehyde dehydrogenase 3 family member B2 [Source:HGNC Symbol;Acc:HGNC:411]	2470.54	2463.37	2466.72	2467.74	2467.2	2466.97	246.713	209.847	339.322	595.545	857.656	848.089	5.11	4.25	6.73	12.26	17.32	16.99	516.195	1.52922	0.251133	6.08927	1.13426e-09	2.86525e-07
ENST00000461988.5	POR-218	protein_coding	POR	cytochrome p450 oxidoreductase [Source:HGNC Symbol;Acc:HGNC:9208]	2343.54	2336.37	2339.72	2340.74	2340.2	2339.97	2502.69	2361.54	2360.23	2944.42	3026.78	3039.54	54.65	50.38	49.37	63.92	64.43	64.19	2705.86	0.318526	0.0523785	6.08123	1.19261e-09	2.98129e-07
ENST00000369966.7	NFKB2-203	protein_coding	NFKB2	nuclear factor kappa B subunit 2 [Source:HGNC Symbol;Acc:HGNC:7795]	2922.54	2915.37	2918.72	2919.74	2919.2	2918.97	432.735	475.993	454.647	701.806	672.623	753.943	7.58	8.14	7.62	12.22	11.47	12.77	581.958	0.646486	0.106947	6.04495	1.49459e-09	3.69765e-07
ENST00000312493.5	PEAK1-201	protein_coding	PEAK1	pseudopodium enriched atypical kinase 1 [Source:HGNC Symbol;Acc:HGNC:29431]	11333.5	11326.4	11329.7	11330.7	11330.2	11330	2484.14	2385.6	2427.62	1840.67	1516.82	1651.91	11.2	10.51	10.49	8.25	6.67	7.21	2051.13	-0.541822	0.0896651	-6.04273	1.51524e-09	3.71049e-07
ENST00000452441.5	DDR1-239	protein_coding	DDR1	discoidin domain receptor tyrosine kinase 1 [Source:HGNC Symbol;Acc:HGNC:2730]	3678.54	3671.37	3674.72	3675.74	3675.2	3674.97	7658.76	7821.38	7537.42	9480.18	11405	10710.6	106.52	106.24	100.4	131.06	154.6	144.05	9102.22	0.456877	0.0757048	6.03498	1.58986e-09	3.85388e-07
ENST00000244458.6	PACSIN1-201	protein_coding	PACSIN1	protein kinase C and casein kinase substrate in neurons 1 [Source:HGNC Symbol;Acc:HGNC:8570]	4052.54	4045.37	4048.72	4049.74	4049.2	4048.97	120.741	171.387	197.23	26.8291	13.5066	36.0186	1.52	2.11	2.38	0.34	0.16	0.44	94.2852	-2.65286	0.44092	-6.01665	1.78068e-09	4.27327e-07
ENST00000368719.8	S100A6-201	protein_coding	S100A6	S100 calcium binding protein A6 [Source:HGNC Symbol;Acc:HGNC:10496]	486.59	479.42	482.77	483.78	483.24	483.02	256.856	229.317	265.097	433.047	429.427	424.123	27.21	23.65	26.85	45.51	44.34	43.37	339.644	0.772288	0.128591	6.00578	1.90412e-09	4.47991e-07
ENST00000375326.8	FBP1-201	protein_coding	FBP1	fructose-bisphosphatase 1 [Source:HGNC Symbol;Acc:HGNC:3606]	1283.54	1276.37	1279.72	1280.74	1280.2	1279.97	6264.28	5556.31	6267.45	7773.44	8054.87	8654	250.13	216.67	239.66	308.54	313.45	334.15	7095.06	0.436567	0.0726804	6.00667	1.89377e-09	4.47991e-07
ENST00000287156.8	UBE2L6-201	protein_coding	UBE2L6	ubiquitin conjugating enzyme E2 L6 [Source:HGNC Symbol;Acc:HGNC:12490]	1175.54	1168.37	1171.72	1172.74	1172.2	1171.97	2360.68	2340.42	2040.44	3559.35	3550.65	3061.8	102.95	99.68	85.23	154.31	150.88	129.11	2818.89	0.593109	0.0991594	5.98137	2.21268e-09	5.15532e-07
ENST00000361951.4	DARS2-201	protein_coding	DARS2	aspartyl-tRNA synthetase 2, mitochondrial [Source:HGNC Symbol;Acc:HGNC:25538]	3327.54	3320.37	3323.72	3324.74	3324.2	3323.97	5498.49	5359.16	5779.94	4571.52	4220.8	4151.98	84.54	80.48	85.12	69.87	63.26	61.74	4930.32	-0.362629	0.0609392	-5.95067	2.67044e-09	6.16204e-07
ENST00000316881.8	TRIM25-201	protein_coding	TRIM25	tripartite motif containing 25 [Source:HGNC Symbol;Acc:HGNC:12932]	5555.54	5548.37	5551.72	5552.74	5552.2	5551.97	10368.2	10663.9	10487.2	11929.8	12023.7	11648.6	95.44	95.87	92.46	109.17	107.88	103.7	11186.9	0.175454	0.0298966	5.86867	4.39306e-09	1.00404e-06
ENST00000281938.6	HSPB8-201	protein_coding	HSPB8	heat shock protein family B (small) member 8 [Source:HGNC Symbol;Acc:HGNC:30171]	1973.54	1966.37	1969.72	1970.74	1970.2	1969.97	7891.13	7734.56	7798.84	8873.56	9018.12	9410.14	204.73	195.96	193.77	228.84	228.01	236.09	8454.39	0.221435	0.0377509	5.86568	4.47292e-09	1.01265e-06
ENST00000376237.8	HLA-C-202	protein_coding	HLA-C	major histocompatibility complex, class I, C [Source:HGNC Symbol;Acc:HGNC:4933]	1359.54	1352.37	1355.72	1356.74	1356.2	1355.97	576.79	509.452	482.297	840.019	796.847	835.843	21.74	18.76	17.41	31.48	29.25	30.48	673.541	0.657373	0.1122	5.85894	4.65818e-09	1.04474e-06
ENST00000317840.9	COL3A1-202	protein_coding	COL3A1	collagen type III alpha 1 chain [Source:HGNC Symbol;Acc:HGNC:2201]	3694.54	3687.37	3690.72	3691.74	3691.2	3690.97	0	10.1488	2.50718	129.851	272.833	103.963	0	0.13	0.03	1.79	3.69	1.39	86.5505	5.3785	0.918387	5.85647	4.72811e-09	1.0506e-06
ENST00000437868.5	MBOAT7-206	protein_coding	MBOAT7	membrane bound O-acyltransferase domain containing 7 [Source:HGNC Symbol;Acc:HGNC:15505]	1854.54	1847.37	1850.72	1851.74	1851.2	1850.97	1222.27	1417.74	1401.65	1901.28	2002.97	2209.49	33.76	38.24	37.07	52.18	53.91	59	1692.57	0.5984	0.102399	5.84384	5.10121e-09	1.12311e-06
ENST00000313040.11	ZNF227-201	protein_coding	ZNF227	zinc finger protein 227 [Source:HGNC Symbol;Acc:HGNC:13020]	2864.54	2857.37	2860.72	2861.74	2861.2	2860.97	90.2999	113.925	101.962	226.423	299.844	233.305	1.61	1.98	1.75	4.02	5.22	4.03	177.626	1.31003	0.224463	5.83627	5.3382e-09	1.1646e-06
ENST00000331923.8	PAXBP1-202	protein_coding	PAXBP1	PAX3 and PAX7 binding protein 1 [Source:HGNC Symbol;Acc:HGNC:13579]	3816.54	3809.37	3812.72	3813.74	3813.2	3812.97	600.094	578.463	649.357	325.166	332.263	238.214	8.04	7.58	8.34	4.33	4.33	3.09	453.926	-1.03547	0.177575	-5.83118	5.50381e-09	1.18991e-06
ENST00000229268.12	USP5-201	protein_coding	USP5	ubiquitin specific peptidase 5 [Source:HGNC Symbol;Acc:HGNC:12628]	3002.54	2995.37	2998.72	2999.74	2999.2	2998.97	671.475	765.849	773.9	478.604	447.065	410.943	11.44	12.74	12.63	8.11	7.44	6.77	591.306	-0.72788	0.124941	-5.82578	5.68477e-09	1.21231e-06
ENST00000392583.6	OAS2-202	protein_coding	OAS2	2'-5'-oligoadenylate synthetase 2 [Source:HGNC Symbol;Acc:HGNC:8087]	4555.54	4548.37	4551.72	4552.74	4552.2	4551.97	2803.23	3031.66	2516.32	5005.33	4990.72	3904.73	31.48	33.24	27.06	55.87	54.61	42.4	3708.66	0.734942	0.126169	5.82508	5.70844e-09	1.21231e-06
ENST00000242827.10	EBPL-201	protein_coding	EBPL	emopamil binding protein like [Source:HGNC Symbol;Acc:HGNC:18061]	735.55	728.37	731.73	732.74	732.2	731.97	581.775	666.902	671.351	400	407.85	376.609	40.62	45.46	44.88	27.74	27.79	25.45	517.415	-0.698673	0.120351	-5.80528	6.42574e-09	1.3457e-06
ENST00000318217.9	MYO1D-201	protein_coding	MYO1D	myosin ID [Source:HGNC Symbol;Acc:HGNC:7598]	5384.54	5377.37	5380.72	5381.74	5381.2	5380.97	1766.76	1617.66	1943	1193.41	1061.63	1209.07	16.78	15	17.68	11.27	9.83	11.11	1465.25	-0.620156	0.106864	-5.80323	6.50476e-09	1.3457e-06
ENST00000361157.10	IFI6-202	protein_coding	IFI6	interferon alpha inducible protein 6 [Source:HGNC Symbol;Acc:HGNC:4054]	662.55	655.38	658.73	659.75	659.2	658.98	26519	24583.8	22939.4	33791.6	34873.6	30689.8	2056.46	1861.77	1703.72	2604.83	2635.67	2301.45	28899.5	0.424132	0.073074	5.80414	6.46964e-09	1.3457e-06
ENST00000447750.6	GDI1-204	protein_coding	GDI1	GDP dissociation inhibitor 1 [Source:HGNC Symbol;Acc:HGNC:4226]	2295.54	2288.37	2291.72	2292.74	2292.2	2291.97	6888.45	6285.98	6186.42	7958.68	8157.83	8057.7	153.59	136.89	132.12	176.42	177.3	173.75	7255.84	0.320112	0.055248	5.7941	6.86875e-09	1.40886e-06
ENST00000443527.6	CRY2-202	protein_coding	CRY2	cryptochrome circadian clock 2 [Source:HGNC Symbol;Acc:HGNC:2385]	4024.54	4017.37	4020.72	4021.74	4021.2	4020.97	2.68311	0	0.835719	310.144	182.339	19.6465	0.03	0	0.01	3.93	2.26	0.24	85.9415	7.13211	1.23389	5.78019	7.46185e-09	1.51754e-06
ENST00000607355.2	HIST2H2AA4-201	protein_coding	HIST2H2AA4	histone cluster 2 H2A family member a4 [Source:HGNC Symbol;Acc:HGNC:29668]	385.64	378.48	381.82	382.83	382.29	382.07	2425.36	2893.87	3011.17	4296.8	3906.48	4440.47	324.36	378	385.63	571.24	509.09	574.25	3495.69	0.602594	0.104538	5.76434	8.19801e-09	1.65324e-06
ENST00000395425.6	DLGAP5-202	protein_coding	DLGAP5	DLG associated protein 5 [Source:HGNC Symbol;Acc:HGNC:16864]	2775.54	2768.37	2771.72	2772.74	2772.2	2771.97	513.17	551.603	606.757	329.437	339.012	289.79	9.47	9.93	10.72	6.04	6.1	5.17	438.295	-0.807339	0.140163	-5.75998	8.41225e-09	1.68231e-06
ENST00000383729.8	P4HTM-202	protein_coding	P4HTM	prolyl 4-hydroxylase, transmembrane [Source:HGNC Symbol;Acc:HGNC:28858]	1948.54	1941.37	1944.72	1945.74	1945.2	1944.97	956.993	934.536	975.38	1229.63	1316.86	1346.65	25.14	24	24.54	32.11	33.72	34.21	1126.67	0.441255	0.076707	5.75247	8.7948e-09	1.74428e-06
ENST00000292538.8	CUX1-202	protein_coding	CUX1	cut like homeobox 1 [Source:HGNC Symbol;Acc:HGNC:2557]	2751.54	2744.37	2747.72	2748.74	2748.2	2747.97	2902.86	2786.25	2862.46	2299.62	2405.5	2281.48	53.99	50.62	50.99	42.52	43.6	41.04	2589.69	-0.293572	0.0514431	-5.70672	1.15171e-08	2.24705e-06
ENST00000522098.1	CLU-209	protein_coding	CLU	clusterin [Source:HGNC Symbol;Acc:HGNC:2095]	671.55	664.38	667.73	668.75	668.2	667.98	490.683	610.583	462.363	858.901	1030.42	1013.58	37.55	45.64	33.9	65.29	76.85	74.97	744.421	0.894858	0.156775	5.70792	1.14366e-08	2.24705e-06
ENST00000202917.9	OAS1-201	protein_coding	OAS1	2'-5'-oligoadenylate synthetase 1 [Source:HGNC Symbol;Acc:HGNC:8086]	1637.54	1630.37	1633.72	1634.74	1634.2	1633.97	4226.86	4707.13	4145.72	6658.47	6753.04	5621.59	132.22	143.77	124.19	207.02	205.86	170.04	5352.14	0.540998	0.0954245	5.66938	1.43315e-08	2.77361e-06
ENST00000366541.7	SDCCAG8-201	protein_coding	SDCCAG8	serologically defined colon cancer antigen 8 [Source:HGNC Symbol;Acc:HGNC:10671]	2388.54	2381.37	2384.72	2385.74	2385.2	2384.97	208.265	222.269	217.301	112.67	109.402	103.146	4.47	4.66	4.47	2.4	2.28	2.13	162.175	-0.99632	0.175876	-5.66491	1.471e-08	2.82409e-06
ENST00000316804.9	GRB2-202	protein_coding	GRB2	growth factor receptor bound protein 2 [Source:HGNC Symbol;Acc:HGNC:4566]	3069.54	3062.37	3065.72	3066.74	3066.2	3065.97	9631.57	8340.65	9448.07	7106.13	7027.44	6625.02	160.55	135.79	150.84	117.76	114.18	106.8	8029.81	-0.402149	0.0710861	-5.65722	1.53846e-08	2.93016e-06
ENST00000393600.7	FAM50A-202	protein_coding	FAM50A	family with sequence similarity 50 member A [Source:HGNC Symbol;Acc:HGNC:18786]	1173.54	1166.37	1169.72	1170.74	1170.2	1169.97	2492.76	2498.65	2355.58	2937.16	3061.74	3064.25	108.87	106.58	98.54	127.54	130.36	129.44	2735.03	0.303523	0.0538522	5.63621	1.73829e-08	3.28469e-06
ENST00000625662.2	CHD2-205	protein_coding	CHD2	chromodomain helicase DNA binding protein 2 [Source:HGNC Symbol;Acc:HGNC:1917]	4948.54	4941.37	4944.72	4945.74	4945.2	4944.97	1466.11	1455.42	1352.17	1855.56	1845.01	1811.56	15.15	14.69	13.39	19.06	18.58	18.11	1630.97	0.367578	0.0652911	5.62983	1.80387e-08	3.38198e-06
ENST00000355854.8	CAB39L-202	protein_coding	CAB39L	calcium binding protein 39 like [Source:HGNC Symbol;Acc:HGNC:20290]	3497.54	3490.37	3493.72	3494.74	3494.2	3493.97	396.154	472.51	522.332	764.074	821.2	839.073	5.79	6.75	7.31	11.11	11.71	11.87	635.89	0.801488	0.142512	5.62401	1.86571e-08	3.47079e-06
ENST00000466846.5	PAXBP1-207	protein_coding	PAXBP1	PAX3 and PAX7 binding protein 1 [Source:HGNC Symbol;Acc:HGNC:13579]	3700.54	3693.37	3696.72	3697.74	3697.2	3696.97	208.372	289.804	178.845	81.5592	58.0784	52.3908	2.88	3.91	2.37	1.12	0.78	0.7	144.842	-1.8177	0.324328	-5.6045	2.08857e-08	3.8555e-06
ENST00000341469.6	TRIM14-201	protein_coding	TRIM14	tripartite motif containing 14 [Source:HGNC Symbol;Acc:HGNC:16283]	4275.54	4268.37	4271.72	4272.74	4272.2	4271.97	2227.99	2392.53	2389.31	2941.57	3076.81	2869.2	26.65	27.95	27.38	34.98	35.88	33.2	2649.57	0.341589	0.0610685	5.59354	2.22491e-08	4.07584e-06
ENST00000372634.1	BEX3-202	protein_coding	BEX3	brain expressed X-linked 3 [Source:HGNC Symbol;Acc:HGNC:13388]	574.57	567.39	570.75	571.76	571.22	570.99	171.721	190.494	173.087	392.394	333.558	311.125	15.36	16.65	14.8	34.91	29.11	26.95	262.063	0.955066	0.171974	5.55354	2.79934e-08	5.08928e-06
ENST00000372829.7	ARMCX1-201	protein_coding	ARMCX1	armadillo repeat containing, X-linked 1 [Source:HGNC Symbol;Acc:HGNC:18073]	1962.54	1955.37	1958.72	1959.74	1959.2	1958.97	621.026	621.887	620.999	983.923	844.14	898.036	16.2	15.84	15.52	25.52	21.46	22.66	765.002	0.549738	0.099111	5.54669	2.91128e-08	5.253e-06
ENST00000354725.7	SND1-201	protein_coding	SND1	staphylococcal nuclease and tudor domain containing 1 [Source:HGNC Symbol;Acc:HGNC:30646]	3297.54	3290.37	3293.72	3294.74	3294.2	3293.97	7539	7167.05	7657.01	6158.66	6121.17	6442.46	116.97	108.61	113.79	94.98	92.57	96.66	6847.56	-0.256139	0.0463873	-5.52174	3.35665e-08	6.01141e-06
ENST00000341369.11	PTMA-201	protein_coding	PTMA	prothymosin, alpha [Source:HGNC Symbol;Acc:HGNC:9623]	1033.54	1026.37	1029.72	1030.74	1030.2	1029.97	5724.91	5795.4	6000.38	5039.35	5022.71	4815.44	284.06	280.83	285.16	248.53	242.89	231.05	5399.7	-0.236931	0.0430281	-5.50642	3.66202e-08	6.50971e-06
ENST00000358514.8	PSMB10-201	protein_coding	PSMB10	proteasome subunit beta 10 [Source:HGNC Symbol;Acc:HGNC:9538]	1039.54	1032.37	1035.72	1036.74	1036.2	1035.97	667.339	651.206	747.33	960.032	1070.99	1048.72	32.93	31.38	35.3	47.1	51.47	50.04	857.603	0.574162	0.104398	5.49976	3.80306e-08	6.71073e-06
ENST00000561424.5	B2M-212	protein_coding	B2M	beta-2-microglobulin [Source:HGNC Symbol;Acc:HGNC:914]	425.61	418.45	421.8	422.81	422.27	422.05	8559.17	10128.4	9317	13392.9	13631.8	11813.5	1036.26	1197.5	1080.35	1611.8	1608.46	1383.11	11140.5	0.471757	0.085881	5.49315	3.9483e-08	6.91616e-06
ENST00000260356.5	THBS1-201	protein_coding	THBS1	thrombospondin 1 [Source:HGNC Symbol;Acc:HGNC:11785]	7596.54	7589.37	7592.72	7593.74	7593.2	7592.97	18711.5	19674	17729.9	15250.8	15801.6	14705.2	125.95	129.33	114.3	102.05	103.66	95.72	16978.8	-0.294484	0.0536373	-5.49029	4.01283e-08	6.96031e-06
ENST00000552039.2	RNASEK-204	protein_coding	RNASEK	ribonuclease K [Source:HGNC Symbol;Acc:HGNC:33911]	412.62	405.46	408.8	409.82	409.28	409.05	303.574	283.065	327.029	561.531	472.614	510.939	37.97	34.47	39.1	69.73	57.46	61.68	409.792	0.757025	0.137905	5.48947	4.03152e-08	6.96031e-06
ENST00000393256.7	BCL2L11-206	protein_coding	BCL2L11	BCL2 like 11 [Source:HGNC Symbol;Acc:HGNC:994]	4907.54	4900.37	4903.72	4904.74	4904.2	4903.97	2395.49	2746.26	2656.71	1908.14	1963.87	1981.01	24.97	27.95	26.52	19.77	19.94	19.96	2275.25	-0.413333	0.0754619	-5.47738	4.31666e-08	7.39937e-06
ENST00000221418.8	ECH1-201	protein_coding	ECH1	enoyl-CoA hydratase 1 [Source:HGNC Symbol;Acc:HGNC:3149]	1232.54	1225.37	1228.72	1229.74	1229.2	1228.97	1889.7	1830.48	1884.94	2350.43	2540.44	2773.61	78.58	74.36	75.06	97.17	102.94	111.55	2211.6	0.452088	0.0826309	5.47117	4.47074e-08	7.60914e-06
ENST00000254351.8	SDC1-201	protein_coding	SDC1	syndecan 1 [Source:HGNC Symbol;Acc:HGNC:10658]	2968.54	2961.37	2964.72	2965.74	2965.2	2964.97	1173.95	1189.96	1252.78	929.306	864.416	904.567	20.23	20.04	20.68	15.93	14.51	15.08	1052.5	-0.421761	0.0771981	-5.46336	4.67207e-08	7.87003e-06
ENST00000376809.9	HLA-A-203	protein_coding	HLA-A	major histocompatibility complex, class I, A [Source:HGNC Symbol;Acc:HGNC:4931]	1432.54	1425.37	1428.72	1429.74	1429.2	1428.97	8952.12	8285.62	6948.49	14422.3	13605.9	11120.5	320.16	289.42	238.02	512.72	474.24	384.62	10555.8	0.694695	0.127171	5.46269	4.68962e-08	7.87003e-06
ENST00000370404.5	CXorf40B-202	protein_coding	CXorf40B	chromosome X open reading frame 40B [Source:HGNC Symbol;Acc:HGNC:17402]	1137.54	1130.37	1133.72	1134.74	1134.2	1133.97	249.878	227.173	250.774	425.87	498.359	396.234	11.28	10.01	10.81	19.08	21.87	17.26	341.381	0.85358	0.156464	5.45543	4.88546e-08	8.14175e-06
ENST00000373394.7	ABCB7-203	protein_coding	ABCB7	ATP binding cassette subfamily B member 7 [Source:HGNC Symbol;Acc:HGNC:48]	2174.54	2167.37	2170.72	2171.74	2171.2	2170.97	309.226	319.349	260.765	162.025	148.569	147.352	7.29	7.35	5.88	3.79	3.41	3.36	224.548	-0.955893	0.175575	-5.44435	5.19945e-08	8.60527e-06
ENST00000271588.8	HMCN1-201	protein_coding	HMCN1	hemicentin 1 [Source:HGNC Symbol;Acc:HGNC:19194]	18029.5	18022.4	18025.7	18026.7	18026.2	18026	1019.37	1071.53	1064.63	783.508	661.839	729.359	2.89	2.97	2.89	2.21	1.83	2	888.372	-0.534574	0.0982417	-5.44142	5.28576e-08	8.6882e-06
ENST00000636615.1	AC068580.4-201	protein_coding	AC068580.4		2049.54	2042.37	2045.72	2046.74	2046.2	2045.97	2100.92	1672.53	1630.63	2840.22	2834.97	2710.47	52.49	40.81	39.02	70.53	69.02	65.48	2298.29	0.633366	0.116549	5.43434	5.49996e-08	8.97877e-06
ENST00000399022.8	RPRD1A-202	protein_coding	RPRD1A	regulation of nuclear pre-mRNA domain containing 1A [Source:HGNC Symbol;Acc:HGNC:25560]	4259.54	4252.37	4255.72	4256.74	4256.2	4255.97	2382.71	2657.5	2631.67	1857.66	1896.33	1610.19	28.61	31.16	30.27	22.18	22.19	18.7	2172.68	-0.517717	0.0953479	-5.42976	5.64294e-08	9.14996e-06
ENST00000368868.9	SELENBP1-201	protein_coding	SELENBP1	selenium binding protein 1 [Source:HGNC Symbol;Acc:HGNC:10719]	1573.54	1566.37	1569.72	1570.74	1570.2	1569.97	2819.75	2367.9	2386.32	3798.04	3656.09	3401.46	91.79	75.27	74.4	122.91	116.01	107.07	3071.59	0.518618	0.0956011	5.42482	5.80142e-08	9.3438e-06
ENST00000369637.5	RHOC-206	protein_coding	RHOC	ras homolog family member C [Source:HGNC Symbol;Acc:HGNC:669]	709.55	702.37	705.73	706.74	706.2	705.97	1868.84	1939.93	1774.14	2432.09	2282.33	2428.32	135.26	137.11	123.02	175	161.02	169.98	2120.94	0.357554	0.0660236	5.41555	6.11011e-08	9.77537e-06
ENST00000264474.3	CSTA-201	protein_coding	CSTA	cystatin A [Source:HGNC Symbol;Acc:HGNC:2481]	572.57	565.39	568.75	569.76	569.22	568.99	78.2959	154.213	157.2	349.508	491.559	515.813	7.01	13.51	13.54	31.18	43.07	44.79	291.098	1.8015	0.33329	5.40522	6.47303e-08	1.02874e-05
ENST00000368404.8	SLC50A1-203	protein_coding	SLC50A1	solute carrier family 50 member 1 [Source:HGNC Symbol;Acc:HGNC:30657]	1121.54	1114.37	1117.72	1118.74	1118.2	1117.97	1331.43	1335.98	1215.42	1795.72	1842.17	1656.98	60.85	59.64	53.23	81.61	82.1	73.25	1529.62	0.446755	0.0829878	5.38339	7.30973e-08	1.15407e-05
ENST00000375631.4	NEU1-206	protein_coding	NEU1	neuraminidase 1 [Source:HGNC Symbol;Acc:HGNC:7758]	1866.54	1859.37	1862.72	1863.74	1863.2	1862.97	2585.74	2284.61	2626.11	3270.39	3248.24	3434.16	70.94	61.2	68.99	89.18	86.83	91.09	2908.21	0.408357	0.0759069	5.37971	7.46057e-08	1.17019e-05
ENST00000261491.9	DGKH-201	protein_coding	DGKH	diacylglycerol kinase eta [Source:HGNC Symbol;Acc:HGNC:2854]	17082.5	17075.4	17078.7	17079.7	17079.2	17079	1696.84	1828.72	1769.93	1401.72	1380.41	1403.06	5.08	5.34	5.07	4.17	4.03	4.06	1580.11	-0.338185	0.0630213	-5.36619	8.04157e-08	1.25313e-05
ENST00000620103.4	MUC1-228	protein_coding	MUC1	mucin 1, cell surface associated [Source:HGNC Symbol;Acc:HGNC:7508]	1632.54	1625.37	1628.72	1629.74	1629.2	1628.97	604.726	438.085	428.782	879.784	961.633	943.072	18.96	13.43	12.89	27.42	29.42	28.6	709.347	0.919094	0.171547	5.35769	8.4292e-08	1.30506e-05
ENST00000263253.8	EP300-201	protein_coding	EP300	E1A binding protein p300 [Source:HGNC Symbol;Acc:HGNC:3373]	9408.54	9401.37	9404.72	9405.74	9405.2	9404.97	3189.1	3094.62	3234.9	2694.96	2566.3	2667.78	17.33	16.42	16.84	14.56	13.59	14.02	2907.94	-0.263188	0.0491612	-5.35357	8.62334e-08	1.32656e-05
ENST00000408974.8	DNM2-204	protein_coding	DNM2	dynamin 2 [Source:HGNC Symbol;Acc:HGNC:2974]	2834.54	2827.37	2830.72	2831.74	2831.2	2830.97	109.968	118.439	109.483	317.635	222.857	403.577	1.99	2.1	1.89	5.7	3.92	7.04	213.66	1.48766	0.279072	5.33073	9.78184e-08	1.49519e-05
ENST00000334444.10	ABCC5-202	protein_coding	ABCC5	ATP binding cassette subfamily C member 5 [Source:HGNC Symbol;Acc:HGNC:56]	5742.54	5735.37	5738.72	5739.74	5739.2	5738.97	1249.75	1361.7	1286.97	1677.44	1727.51	1895.87	11.13	11.84	10.98	14.85	14.99	16.33	1533.21	0.445524	0.0837464	5.31992	1.0381e-07	1.57673e-05
ENST00000370035.7	FAM102B-201	protein_coding	FAM102B	family with sequence similarity 102 member B [Source:HGNC Symbol;Acc:HGNC:27637]	5421.54	5414.37	5417.72	5418.74	5418.2	5417.97	7621.71	8753.35	8567.59	11087.3	10932.3	10215.3	71.9	80.64	77.4	103.97	100.51	93.19	9529.6	0.369959	0.0698131	5.29928	1.16258e-07	1.75469e-05
ENST00000368738.3	S100A9-201	protein_coding	S100A9	S100 calcium binding protein A9 [Source:HGNC Symbol;Acc:HGNC:10499]	398.63	391.47	394.81	395.83	395.28	395.06	1533.39	1524.94	1750.61	2692.83	2188.9	2923.99	198.32	192.62	216.85	346.22	275.92	365.71	2102.44	0.699527	0.132296	5.28761	1.23927e-07	1.8472e-05
ENST00000383694.3	FILIP1L-203	protein_coding	FILIP1L	filamin A interacting protein 1 like [Source:HGNC Symbol;Acc:HGNC:24589]	3101.54	3094.37	3097.72	3098.74	3098.2	3097.97	174.357	222.189	240.694	424.952	398.442	510.813	2.88	3.58	3.8	6.96	6.41	8.15	328.575	1.06881	0.202122	5.28793	1.23711e-07	1.8472e-05
ENST00000377047.8	GPC6-201	protein_coding	GPC6	glypican 6 [Source:HGNC Symbol;Acc:HGNC:4454]	6288.54	6281.37	6284.72	6285.74	6285.2	6284.97	313.126	399.02	386.925	194.254	186.393	203.83	2.55	3.17	3.01	1.57	1.47	1.6	280.591	-0.907384	0.172289	-5.26664	1.3894e-07	2.05819e-05
ENST00000262288.7	SCPEP1-201	protein_coding	SCPEP1	serine carboxypeptidase 1 [Source:HGNC Symbol;Acc:HGNC:29507]	1763.54	1756.37	1759.72	1760.74	1760.2	1759.97	963.962	1099.54	1020.53	1462.42	1346.56	1516.11	28	31.17	28.39	42.22	38.12	42.59	1234.85	0.490795	0.0935701	5.24521	1.56103e-07	2.29825e-05
ENST00000370355.2	SCD-201	protein_coding	SCD	stearoyl-CoA desaturase [Source:HGNC Symbol;Acc:HGNC:10571]	5183.54	5176.37	5179.72	5180.74	5180.2	5179.97	22691.8	19340.3	23175.7	32114.5	27522.6	30323.3	223.89	186.36	219.01	314.98	264.67	289.33	25861.4	0.464205	0.0886622	5.23565	1.64401e-07	2.40567e-05
ENST00000558914.5	DCAF11-215	protein_coding	DCAF11	DDB1 and CUL4 associated factor 11 [Source:HGNC Symbol;Acc:HGNC:20258]	2163.54	2156.37	2159.72	2160.74	2160.2	2159.97	72.3904	60.9364	81.9069	214.603	291.736	164.544	1.71	1.41	1.86	5.04	6.72	3.77	147.686	1.63139	0.313181	5.20911	1.89747e-07	2.75972e-05
ENST00000285379.9	CA2-201	protein_coding	CA2	carbonic anhydrase 2 [Source:HGNC Symbol;Acc:HGNC:1373]	1538.54	1531.37	1534.72	1535.74	1535.2	1534.97	1725.52	1786.46	2056.17	1358.27	1284.42	1288.54	57.46	58.09	65.55	44.95	41.66	41.48	1583.23	-0.50276	0.0965418	-5.20769	1.9121e-07	2.76425e-05
ENST00000314128.8	STAT2-201	protein_coding	STAT2	signal transducer and activator of transcription 2 [Source:HGNC Symbol;Acc:HGNC:11363]	3080.54	3073.37	3076.72	3077.74	3077.2	3076.97	350.5	400.394	380.263	627.769	626.702	544.377	5.83	6.49	6.05	10.36	10.14	8.74	488.334	0.668149	0.128428	5.20254	1.96588e-07	2.82498e-05
ENST00000369762.6	ATP6AP1-201	protein_coding	ATP6AP1	ATPase H+ transporting accessory protein 1 [Source:HGNC Symbol;Acc:HGNC:868]	1920.54	1913.37	1916.72	1917.74	1917.2	1916.97	8607.36	7833.16	8213.44	9626.71	10060.8	10448.2	229.47	203.97	209.71	255.14	261.41	269.37	9131.6	0.28958	0.0556822	5.20059	1.98661e-07	2.83777e-05
ENST00000468057.5	SLC41A1-202	protein_coding	SLC41A1	solute carrier family 41 member 1 [Source:HGNC Symbol;Acc:HGNC:19429]	3598.54	3591.37	3594.72	3595.74	3595.2	3594.97	792.331	854.778	916.794	1350.01	1179.12	1211.54	11.27	11.86	12.48	19.08	16.34	16.65	1050.76	0.545014	0.105093	5.18602	2.14841e-07	3.04673e-05
ENST00000615264.4	PSME2-217	protein_coding	PSME2	proteasome activator subunit 2 [Source:HGNC Symbol;Acc:HGNC:9569]	695.55	688.38	691.73	692.74	692.2	691.98	2931.26	3145.19	3256.54	3988.01	4353.99	3864.33	216.47	226.88	230.31	292.8	313.41	276	3589.89	0.386266	0.0744944	5.18516	2.15828e-07	3.04673e-05
ENST00000427522.6	HELZ2-202	protein_coding	HELZ2	helicase with zinc finger 2 [Source:HGNC Symbol;Acc:HGNC:30021]	7648.54	7641.37	7644.72	7645.74	7645.2	7644.97	5399.71	5085.28	4579.54	7031.9	7105.93	6299.89	36.1	33.2	29.32	46.73	46.3	40.73	5917.04	0.439804	0.0849711	5.17592	2.26787e-07	3.18271e-05
ENST00000276699.10	FAM83A-201	protein_coding	FAM83A	family with sequence similarity 83 member A [Source:HGNC Symbol;Acc:HGNC:28210]	1679.54	1672.37	1675.72	1676.74	1676.2	1675.97	187.592	125.32	162.15	327.241	320.095	343.828	5.72	3.74	4.74	9.91	9.5	10.14	244.371	1.05722	0.204535	5.16891	2.35469e-07	3.27222e-05
ENST00000366672.4	GALNT2-201	protein_coding	GALNT2	polypeptide N-acetylgalactosaminyltransferase 2 [Source:HGNC Symbol;Acc:HGNC:4124]	4275.54	4268.37	4271.72	4272.74	4272.2	4271.97	1797.77	1817.51	1837.74	1396.2	1408.74	1511.96	21.51	21.23	21.06	16.6	16.43	17.49	1628.32	-0.335088	0.0648319	-5.16857	2.35892e-07	3.27222e-05
ENST00000220509.9	VPS18-201	protein_coding	VPS18	VPS18, CORVET/HOPS core subunit [Source:HGNC Symbol;Acc:HGNC:15972]	3716.54	3709.37	3712.72	3713.74	3713.2	3712.97	1015.93	996.832	987.828	1249.15	1349.31	1408.82	13.99	13.4	13.02	17.09	18.1	18.75	1167.98	0.418281	0.0812547	5.14777	2.63595e-07	3.63549e-05
ENST00000283882.3	CFDP1-201	protein_coding	CFDP1	craniofacial development protein 1 [Source:HGNC Symbol;Acc:HGNC:1873]	1096.54	1089.37	1092.72	1093.74	1093.2	1092.97	2382.49	2432.52	2549.57	2032.76	2008.29	2013.1	111.38	111.07	114.17	94.47	91.52	91.04	2236.45	-0.283018	0.0550984	-5.1366	2.79759e-07	3.83638e-05
ENST00000233813.4	IGFBP5-201	protein_coding	IGFBP5	insulin like growth factor binding protein 5 [Source:HGNC Symbol;Acc:HGNC:5474]	6036.54	6029.37	6032.72	6033.74	6033.2	6032.97	9582.33	7970.45	8119.6	6063.7	4093.9	4179.75	81.18	65.95	65.88	51.06	33.8	34.24	6668.29	-0.840437	0.163792	-5.13111	2.88038e-07	3.90527e-05
ENST00000409512.5	KYNU-203	protein_coding	KYNU	kynureninase [Source:HGNC Symbol;Acc:HGNC:6469]	1397.54	1390.37	1393.72	1394.74	1394.2	1393.97	3615.46	4199.56	4136.69	5054.13	5328.08	5193.51	132.56	150.35	145.25	184.2	190.37	184.14	4587.9	0.382233	0.0744874	5.13152	2.87414e-07	3.90527e-05
ENST00000218388.8	TIMP1-201	protein_coding	TIMP1	TIMP metallopeptidase inhibitor 1 [Source:HGNC Symbol;Acc:HGNC:11820]	713.55	706.37	709.73	710.74	710.2	709.97	923.756	904.821	963.149	1243.93	1535.51	1334.51	66.51	63.62	66.39	88.99	107.69	92.86	1150.95	0.557214	0.108962	5.11385	3.15666e-07	4.25581e-05
ENST00000464060.5	MAGI1-205	protein_coding	MAGI1	membrane associated guanylate kinase, WW and PDZ domain containing 1 [Source:HGNC Symbol;Acc:HGNC:946]	2068.54	2061.37	2064.72	2065.74	2065.2	2064.97	141.196	111.726	135.398	56.8689	43.2201	41.75	3.5	2.69	3.2	1.4	1.03	1.01	88.3597	-1.45708	0.285355	-5.1062	3.28693e-07	4.40669e-05
ENST00000265866.11	HNRNPH3-201	protein_coding	HNRNPH3	heterogeneous nuclear ribonucleoprotein H3 [Source:HGNC Symbol;Acc:HGNC:5043]	2160.54	2153.37	2156.72	2157.74	2157.2	2156.97	4035.09	4369.37	4285.07	3590.3	3356.32	3340.81	95.61	101.1	97.24	84.57	77.5	76.55	3829.49	-0.302498	0.0592546	-5.10505	3.30709e-07	4.40909e-05
ENST00000404158.5	GATAD2A-203	protein_coding	GATAD2A	GATA zinc finger domain containing 2A [Source:HGNC Symbol;Acc:HGNC:29989]	5597.54	5590.37	5593.72	5594.74	5594.2	5593.97	2435.95	2403.31	2480.35	2881.57	2825.61	2887.19	22.26	21.45	21.7	26.17	25.17	25.51	2652.33	0.231688	0.0453986	5.10342	3.33575e-07	4.42273e-05
ENST00000530069.5	ALDH3B2-204	protein_coding	ALDH3B2	aldehyde dehydrogenase 3 family member B2 [Source:HGNC Symbol;Acc:HGNC:411]	2301.54	2294.37	2297.72	2298.74	2298.2	2297.97	328.023	250.49	197.243	666.353	506.488	752.314	7.3	5.45	4.21	14.73	10.97	16.18	450.152	1.31318	0.258108	5.08772	3.62387e-07	4.77833e-05
ENST00000569417.5	MLST8-232	protein_coding	MLST8	MTOR associated protein, LST8 homolog [Source:HGNC Symbol;Acc:HGNC:24825]	1691.54	1684.37	1687.72	1688.74	1688.2	1687.97	41.9856	22.5799	46.8062	143.772	133.71	119.521	1.27	0.66	1.35	4.32	3.95	3.51	84.7291	1.81926	0.358104	5.08024	3.76966e-07	4.94341e-05
ENST00000258534.12	DRAM1-201	protein_coding	DRAM1	DNA damage regulated autophagy modulator 1 [Source:HGNC Symbol;Acc:HGNC:25645]	3340.54	3333.37	3336.72	3337.74	3337.2	3336.97	1031.03	1192.05	1173.37	1587.16	1520.84	1516.88	15.8	17.83	17.21	24.17	22.7	22.46	1336.89	0.4461	0.0882362	5.05574	4.2872e-07	5.59154e-05
ENST00000290291.10	OGFR-201	protein_coding	OGFR	opioid growth factor receptor [Source:HGNC Symbol;Acc:HGNC:15768]	2231.54	2224.37	2227.72	2228.74	2228.2	2227.97	4108.58	3812.84	3715.88	4758.86	5140.51	4734.1	94.25	85.42	81.63	108.53	114.94	105.01	4378.46	0.329735	0.0652349	5.05458	4.31346e-07	5.59538e-05
ENST00000361752.7	QKI-203	protein_coding	QKI	QKI, KH domain containing RNA binding [Source:HGNC Symbol;Acc:HGNC:21100]	9284.54	9277.37	9280.72	9281.74	9281.2	9280.97	355.237	304.279	305.857	166.356	186.394	190.732	1.96	1.63	1.61	0.91	1	1.02	251.476	-0.828755	0.164236	-5.04613	4.50842e-07	5.81683e-05
ENST00000379328.7	GATA3-202	protein_coding	GATA3	GATA binding protein 3 [Source:HGNC Symbol;Acc:HGNC:4172]	2899.54	2892.37	2895.72	2896.74	2896.2	2895.97	23473.8	22427.2	23044.9	25221	25262.5	25682.4	414.27	386.54	389.52	442.46	434.53	438.3	24185.3	0.143613	0.0285186	5.03578	4.75903e-07	6.07485e-05
ENST00000474629.6	PARP14-202	protein_coding	PARP14	poly(ADP-ribose) polymerase family member 14 [Source:HGNC Symbol;Acc:HGNC:29232]	7736.54	7729.37	7732.72	7733.74	7733.2	7732.97	9287.37	10630.3	9900.33	12883.3	13151.6	11885.1	61.38	68.62	62.67	84.64	84.72	75.96	11289.7	0.346708	0.0688419	5.0363	4.74627e-07	6.07485e-05
ENST00000370782.6	MMS19-203	protein_coding	MMS19	MMS19 homolog, cytosolic iron-sulfur assembly component [Source:HGNC Symbol;Acc:HGNC:13824]	3353.54	3346.37	3349.72	3350.74	3350.2	3349.97	1376.2	1305.95	1419.91	1046.3	1053.51	1085.48	21	19.46	20.75	15.86	15.66	16.01	1214.56	-0.365214	0.0725878	-5.03134	4.87056e-07	6.18432e-05
ENST00000221249.10	PNPLA6-201	protein_coding	PNPLA6	patatin like phospholipase domain containing 6 [Source:HGNC Symbol;Acc:HGNC:16268]	4438.54	4431.37	4434.72	4435.74	4435.2	4434.97	160.999	121.765	157.114	342.344	262.029	370.008	1.86	1.38	1.73	3.92	2.94	4.12	235.71	1.14742	0.229189	5.00644	5.54458e-07	7.0031e-05
ENST00000243501.9	PLA2G12A-201	protein_coding	PLA2G12A	phospholipase A2 group XIIA [Source:HGNC Symbol;Acc:HGNC:18554]	5047.54	5040.37	5043.72	5044.74	5044.2	5043.97	1000.97	1022.5	1027.08	810.265	765.83	751.474	10.14	10.11	9.97	8.16	7.57	7.37	896.353	-0.390872	0.0785519	-4.97598	6.49196e-07	8.15676e-05
ENST00000343677.3	HIST1H1C-201	protein_coding	HIST1H1C	histone cluster 1 H1 family member c [Source:HGNC Symbol;Acc:HGNC:4716]	463.6	456.43	459.78	460.79	460.25	460.03	977.306	1236.74	1127.33	1576.66	1848.67	1675.22	108.56	134.16	119.93	174.09	200.13	179.94	1406.99	0.610516	0.12297	4.96475	6.87883e-07	8.59782e-05
ENST00000621418.4	MAGI1-218	protein_coding	MAGI1	membrane associated guanylate kinase, WW and PDZ domain containing 1 [Source:HGNC Symbol;Acc:HGNC:946]	6046.54	6039.37	6042.72	6043.74	6043.2	6042.97	448.208	321.253	395.283	180.301	87.7939	130.975	3.79	2.65	3.2	1.51	0.73	1.07	260.636	-1.54169	0.310627	-4.96317	6.93527e-07	8.62345e-05
ENST00000637919.1	PLCB1-233	protein_coding	PLCB1	phospholipase C beta 1 [Source:HGNC Symbol;Acc:HGNC:15917]	4895.54	4888.37	4891.72	4892.74	4892.2	4891.97	363.169	305.516	437.91	113.759	185.042	152.26	3.79	3.11	4.39	1.18	1.88	1.54	259.609	-1.29976	0.262148	-4.95812	7.11772e-07	8.80469e-05
ENST00000517325.5	CHMP7-203	protein_coding	CHMP7	charged multivesicular body protein 7 [Source:HGNC Symbol;Acc:HGNC:28439]	2460.54	2453.37	2456.72	2457.74	2457.2	2456.97	703.484	541.544	614.289	335.865	368.724	388.844	14.64	11.01	12.24	6.94	7.49	7.82	492.125	-0.766181	0.154602	-4.95583	7.20228e-07	8.86361e-05
ENST00000485362.1	MINOS1-206	protein_coding	MINOS1	mitochondrial inner membrane organizing system 1 [Source:HGNC Symbol;Acc:HGNC:32068]	259.83	252.77	256.05	257.05	256.51	256.31	582.134	614.793	703.768	422.915	364.549	335.751	116.05	119.63	134.42	83.71	70.74	64.7	503.985	-0.760921	0.154394	-4.92845	8.28852e-07	0.000101484
ENST00000624952.1	PRAL-201	TEC	PRAL	p53 regulation associated lncRNA [Source:HGNC Symbol;Acc:HGNC:52646]	3107.54	3100.37	3103.72	3104.74	3104.2	3103.97	311.162	334.974	250.723	632.063	528.105	503.446	5.13	5.39	3.95	10.35	8.48	8.01	426.745	0.89343	0.181442	4.92405	8.47727e-07	0.000103268
ENST00000426002.5	SHISA5-206	protein_coding	SHISA5	shisa family member 5 [Source:HGNC Symbol;Acc:HGNC:30376]	1660.54	1653.37	1656.72	1657.74	1657.2	1656.97	3271.18	2688.25	2930.41	3895.75	4151.77	3954.02	100.88	80.96	86.56	119.44	124.8	117.92	3481.9	0.432088	0.0877697	4.92297	8.52406e-07	0.000103313
ENST00000404816.6	LTBP1-203	protein_coding	LTBP1	latent transforming growth factor beta binding protein 1 [Source:HGNC Symbol;Acc:HGNC:6714]	6154.54	6147.37	6150.72	6151.74	6151.2	6150.97	421.373	419.315	417.011	281.185	243.122	281.597	3.5	3.4	3.32	2.32	1.97	2.26	343.934	-0.636898	0.129439	-4.92047	8.63385e-07	0.000104118
ENST00000291568.6	CSTB-201	protein_coding	CSTB	cystatin B [Source:HGNC Symbol;Acc:HGNC:2482]	1985.54	1978.37	1981.72	1982.74	1982.2	1981.97	4232.89	4066.44	4301.85	4929.29	4991.91	5398.86	109.15	102.41	106.25	126.35	125.45	134.62	4653.54	0.282272	0.0573993	4.91769	8.75707e-07	0.000105076
ENST00000332180.9	WASHC4-202	protein_coding	WASHC4	WASH complex subunit 4 [Source:HGNC Symbol;Acc:HGNC:29174]	5633.54	5626.37	5629.72	5630.74	5630.2	5629.97	1621.89	1914.08	1919.6	1321.12	1075.14	1218.89	14.73	16.97	16.69	11.93	9.51	10.7	1511.79	-0.592239	0.120668	-4.90801	9.20032e-07	0.000109845
ENST00000450791.6	GOLGA3-202	protein_coding	GOLGA3	golgin A3 [Source:HGNC Symbol;Acc:HGNC:4426]	8691.54	8684.37	8687.72	8688.74	8688.2	8687.97	2520.6	2500.79	2720.13	3213.33	3067.4	3273.55	14.83	14.37	15.32	18.79	17.59	18.62	2882.63	0.303782	0.062042	4.89638	9.76164e-07	0.00011597
ENST00000366955.7	CENPF-201	protein_coding	CENPF	centromere protein F [Source:HGNC Symbol;Acc:HGNC:1857]	10128.5	10121.4	10124.7	10125.7	10125.2	10125	4979.74	4942.68	5466.14	4305.95	4020.99	3951.33	25.14	24.36	26.43	21.61	19.79	19.29	4611.14	-0.326267	0.066745	-4.88825	1.01735e-06	0.000120268
ENST00000409858.7	UAP1L1-202	protein_coding	UAP1L1	UDP-N-acetylglucosamine pyrophosphorylase 1 like 1 [Source:HGNC Symbol;Acc:HGNC:28082]	3186.54	3179.37	3182.72	3183.74	3183.2	3182.97	481.956	406.017	330.953	724.354	761.768	696.637	7.74	6.36	5.09	11.55	11.92	10.82	566.948	0.840382	0.172435	4.8736	1.09582e-06	0.000128909
ENST00000409652.4	APOL6-201	protein_coding	APOL6	apolipoprotein L6 [Source:HGNC Symbol;Acc:HGNC:14870]	9942.54	9935.37	9938.72	9939.74	9939.2	9938.97	224.601	283.986	245.688	466.871	520.014	398.653	1.15	1.43	1.21	2.39	2.61	1.98	356.636	0.876519	0.18017	4.86496	1.14483e-06	0.000134017
ENST00000305366.7	TM4SF1-201	protein_coding	TM4SF1	transmembrane 4 L six family member 1 [Source:HGNC Symbol;Acc:HGNC:11853]	1592.54	1585.37	1588.72	1589.74	1589.2	1588.97	490.365	328.583	388.664	212.434	172.877	151.449	15.77	10.31	11.97	6.78	5.42	4.71	290.729	-1.17295	0.241322	-4.86052	1.17076e-06	0.000135972
ENST00000463574.1	HLA-B-251	protein_coding	HLA-B	major histocompatibility complex, class I, B [Source:HGNC Symbol;Acc:HGNC:4932]	409.62	402.46	405.81	406.82	406.28	406.05	21.3022	35.2435	56.0374	197.177	156.638	133.467	2.67	4.31	6.75	24.69	19.13	16.23	99.9776	2.10932	0.434002	4.86017	1.17286e-06	0.000135972
ENST00000258770.7	TBRG4-201	protein_coding	TBRG4	transforming growth factor beta regulator 4 [Source:HGNC Symbol;Acc:HGNC:17443]	2064.54	2057.37	2060.72	2061.74	2061.2	2060.97	2516.49	2227.75	2485.65	1911.01	1897.63	1851.73	62.41	53.95	59.04	47.12	45.85	44.4	2148.38	-0.354522	0.0729879	-4.85728	1.19011e-06	0.000137309
ENST00000394434.6	LARS-202	protein_coding	LARS	leucyl-tRNA synthetase [Source:HGNC Symbol;Acc:HGNC:6512]	4587.54	4580.37	4583.72	4584.74	4584.2	4583.97	2914.16	2983.16	3163.16	2523.06	2500.09	2389.5	32.49	32.48	33.78	27.96	27.16	25.77	2745.52	-0.29083	0.0599351	-4.85241	1.21967e-06	0.000140046
ENST00000515435.5	CSNK1A1-205	protein_coding	CSNK1A1	casein kinase 1 alpha 1 [Source:HGNC Symbol;Acc:HGNC:2451]	1677.54	1670.37	1673.72	1674.74	1674.2	1673.97	359.998	331.931	281.674	503.199	536.192	554.218	10.99	9.89	8.22	15.28	15.97	16.36	427.869	0.712634	0.147092	4.84481	1.2673e-06	0.000144822
ENST00000492382.5	PARP9-207	protein_coding	PARP9	poly(ADP-ribose) polymerase family member 9 [Source:HGNC Symbol;Acc:HGNC:24118]	1658.54	1651.37	1654.72	1655.74	1655.2	1654.97	493.087	456.134	462.213	821.853	705.018	662.278	15.22	13.77	13.68	25.23	21.22	19.77	600.097	0.631889	0.130494	4.8423	1.28348e-06	0.000145976
ENST00000376630.4	HLA-E-201	protein_coding	HLA-E	major histocompatibility complex, class I, E [Source:HGNC Symbol;Acc:HGNC:4962]	2422.54	2415.37	2418.72	2419.74	2419.2	2418.97	4115.34	4332.45	4005.84	5254.72	5528.16	4865.88	86.95	89.39	81.07	110.36	113.85	99.41	4683.73	0.328971	0.068231	4.82143	1.42534e-06	0.000161346
ENST00000305544.8	LAMB2-201	protein_coding	LAMB2	laminin subunit beta 2 [Source:HGNC Symbol;Acc:HGNC:6487]	5464.54	5457.37	5460.72	5461.74	5461.2	5460.97	4664.3	4076.23	4062.33	5315.6	5663.37	5420.75	43.65	37.25	36.41	49.45	51.66	49.06	4867.1	0.356724	0.0740223	4.81914	1.4418e-06	0.000162442
ENST00000260403.6	TMEM62-201	protein_coding	TMEM62	transmembrane protein 62 [Source:HGNC Symbol;Acc:HGNC:26269]	2592.54	2585.37	2588.72	2589.74	2589.2	2588.97	295.002	291.057	314.246	433.519	453.816	441.235	5.82	5.62	5.94	8.52	8.74	8.43	371.479	0.558988	0.116071	4.81589	1.46543e-06	0.000164334
ENST00000306442.4	PPIC-201	protein_coding	PPIC	peptidylprolyl isomerase C [Source:HGNC Symbol;Acc:HGNC:9256]	1201.54	1194.37	1197.72	1198.74	1198.2	1197.97	2081.46	2110.87	2188.38	2509.17	2499.91	2595.15	88.8	87.94	89.4	106.41	103.92	107.05	2330.82	0.253647	0.052854	4.79901	1.59454e-06	0.000177981
ENST00000261847.7	SECISBP2L-201	protein_coding	SECISBP2L	SECIS binding protein 2 like [Source:HGNC Symbol;Acc:HGNC:28997]	6600.54	6593.37	6596.72	6597.74	6597.2	6596.97	211.142	333.635	264.913	522.663	517.309	541.091	1.64	2.53	1.97	4.02	3.91	4.05	398.459	0.9691	0.202233	4.792	1.65126e-06	0.000183458
ENST00000492796.5	CDC42SE1-206	protein_coding	CDC42SE1	CDC42 small effector 1 [Source:HGNC Symbol;Acc:HGNC:17719]	995.54	988.37	991.72	992.74	992.2	991.97	573.577	592.511	586.838	748.697	798.173	822.77	29.54	29.79	28.94	38.33	40.09	40.98	687.094	0.436175	0.0913129	4.77671	1.78183e-06	0.000197052
ENST00000361908.7	OPA1-205	protein_coding	OPA1	OPA1, mitochondrial dynamin like GTPase [Source:HGNC Symbol;Acc:HGNC:8140]	6260.54	6253.37	6256.72	6257.74	6257.2	6256.97	1135.3	1079.84	1083.89	766.283	714.508	858.706	9.27	8.62	8.48	6.22	5.68	6.78	939.755	-0.492236	0.103238	-4.76796	1.86105e-06	0.00020487
ENST00000358334.9	MYOF-201	protein_coding	MYOF	myoferlin [Source:HGNC Symbol;Acc:HGNC:3656]	6501.54	6494.37	6497.72	6498.74	6498.2	6497.97	5841.25	6761.79	6804.19	7948.34	8460.64	8745.05	45.95	51.94	51.26	62.14	64.86	66.52	7426.88	0.374429	0.078574	4.7653	1.88569e-06	0.000206634
ENST00000373736.6	NKAIN1-201	protein_coding	NKAIN1	sodium/potassium transporting ATPase interacting 1 [Source:HGNC Symbol;Acc:HGNC:25743]	2410.54	2403.37	2406.72	2407.74	2407.2	2406.97	3287.6	3490.81	3267.86	2429.38	2813.38	2438.67	69.81	72.39	66.46	51.29	58.22	50.08	2954.62	-0.388388	0.0815493	-4.76262	1.91098e-06	0.000208454
ENST00000258341.4	LAMC1-201	protein_coding	LAMC1	laminin subunit gamma 1 [Source:HGNC Symbol;Acc:HGNC:6492]	7710.54	7703.37	7706.72	7707.74	7707.2	7706.97	2725.37	2854.82	2913.19	2423.39	2329.92	2339.54	18.07	18.49	18.5	15.97	15.06	15	2597.7	-0.259867	0.0546029	-4.75921	1.94355e-06	0.000211047
ENST00000326172.9	NFKBIZ-202	protein_coding	NFKBIZ	NFKB inhibitor zeta [Source:HGNC Symbol;Acc:HGNC:29805]	3744.54	3737.37	3740.72	3741.74	3741.2	3740.97	111.789	179.293	186.367	324.091	393.042	409.303	1.53	2.39	2.44	4.4	5.24	5.41	267.314	1.23976	0.260787	4.75392	1.99512e-06	0.000215671
ENST00000360718.5	SQSTM1-201	protein_coding	SQSTM1	sequestosome 1 [Source:HGNC Symbol;Acc:HGNC:11280]	2074.54	2067.37	2070.72	2071.74	2071.2	2070.97	4039.29	4996.02	4658.7	5804.93	7082.69	7247.3	99.69	120.41	110.12	142.39	170.34	172.96	5638.16	0.556412	0.117789	4.72379	2.31492e-06	0.000249118
ENST00000303887.9	MCM7-201	protein_coding	MCM7	minichromosome maintenance complex component 7 [Source:HGNC Symbol;Acc:HGNC:6950]	2778.54	2771.37	2774.72	2775.74	2775.2	2774.97	4508.57	4490.65	4669.36	3692.49	3983.06	3919.53	83.04	80.78	82.37	67.6	71.49	69.81	4210.61	-0.237929	0.0504081	-4.72006	2.3578e-06	0.0002526
ENST00000334126.11	C2CD3-202	protein_coding	C2CD3	C2 calcium dependent domain containing 3 [Source:HGNC Symbol;Acc:HGNC:24564]	7781.54	7774.37	7777.72	7778.74	7778.2	7777.97	924.266	976.023	991.955	748.053	711.809	654.874	6.08	6.26	6.24	4.88	4.56	4.16	834.497	-0.453758	0.096241	-4.7148	2.41943e-06	0.000253934
ENST00000378757.6	OPTN-205	protein_coding	OPTN	optineurin [Source:HGNC Symbol;Acc:HGNC:17142]	3142.54	3135.37	3138.72	3139.74	3139.2	3138.97	1049.74	1238.37	968.623	1641.86	1607.28	1520.98	17.09	19.7	15.1	26.57	25.51	23.95	1337.81	0.551892	0.117063	4.71449	2.42316e-06	0.000253934
ENST00000380680.4	UBL3-201	protein_coding	UBL3	ubiquitin like 3 [Source:HGNC Symbol;Acc:HGNC:12504]	4205.54	4198.37	4201.72	4202.74	4202.2	4201.97	3056.17	3207.76	3218.34	3912.78	3721.08	3655.88	37.17	38.1	37.49	47.31	44.11	43	3462	0.251596	0.0533436	4.71652	2.39912e-06	0.000253934
ENST00000420696.6	PBX1-203	protein_coding	PBX1	PBX homeobox 1 [Source:HGNC Symbol;Acc:HGNC:8632]	6457.54	6450.37	6453.72	6454.74	6454.2	6453.97	3974.97	4383.52	4353.95	3506.24	3365.89	3536.33	31.48	33.9	33.02	27.6	25.98	27.08	3853.48	-0.287548	0.0609921	-4.71451	2.42296e-06	0.000253934
ENST00000513610.5	MYO10-210	protein_coding	MYO10	myosin X [Source:HGNC Symbol;Acc:HGNC:7593]	7859.54	7852.37	7855.72	7856.74	7856.2	7855.97	1026.27	1018.85	966.048	767.372	614.56	684.343	6.67	6.47	6.02	4.96	3.9	4.3	846.24	-0.541067	0.114686	-4.71782	2.3838e-06	0.000253934
ENST00000373151.6	MAP7D1-204	protein_coding	MAP7D1	MAP7 domain containing 1 [Source:HGNC Symbol;Acc:HGNC:25514]	3145.54	3138.37	3141.72	3142.74	3142.2	3141.97	156.477	192.861	144.583	295.107	343.066	290.607	2.54	3.06	2.25	4.78	5.43	4.57	237.117	0.913169	0.193807	4.71174	2.45612e-06	0.00025627
ENST00000256720.6	LPIN1-201	protein_coding	LPIN1	lipin 1 [Source:HGNC Symbol;Acc:HGNC:13345]	5205.54	5198.37	5201.72	5202.74	5202.2	5201.97	464.268	434.016	437.908	755.535	630.763	633.595	4.56	4.16	4.12	7.38	6.04	6.02	559.348	0.595804	0.126888	4.6955	2.65952e-06	0.000276291
ENST00000396864.7	IRF9-202	protein_coding	IRF9	interferon regulatory factor 9 [Source:HGNC Symbol;Acc:HGNC:6131]	1659.54	1652.37	1655.72	1656.74	1656.2	1655.97	1989.32	2107.92	2143.06	2459.12	2617.48	2530.41	61.38	63.53	63.34	75.44	78.73	75.52	2307.89	0.285168	0.060816	4.68902	2.74515e-06	0.000283957
ENST00000216797.9	NFKBIA-201	protein_coding	NFKBIA	NFKB inhibitor alpha [Source:HGNC Symbol;Acc:HGNC:7797]	1379.54	1372.37	1375.72	1376.74	1376.2	1375.97	3818.92	4032.53	3767.25	4561.67	4795.95	4477.2	141.83	146.27	134	168.41	173.62	160.82	4242.25	0.251595	0.0537032	4.68491	2.80078e-06	0.000287235
ENST00000621160.4	IFI27-215	protein_coding	IFI27	interferon alpha inducible protein 27 [Source:HGNC Symbol;Acc:HGNC:5397]	465.6	458.43	461.78	462.79	462.25	462.03	5465.09	5275	4473.35	6919.76	6992.29	6454.43	604.42	569.76	473.81	760.73	753.73	690.3	5929.99	0.420856	0.0898319	4.68493	2.80051e-06	0.000287235
ENST00000564237.1	AC239868.2-201	sense_overlapping	AC239868.2		4348.54	4341.37	4344.72	4345.74	4345.2	4344.97	2321.93	2385.73	2310.75	2740.89	2821.54	2687.47	27.32	27.41	26.03	32.04	32.35	30.57	2544.72	0.232555	0.049649	4.68399	2.81341e-06	0.000287303
ENST00000374882.7	PSMB8-202	protein_coding	PSMB8	proteasome subunit beta 8 [Source:HGNC Symbol;Acc:HGNC:9545]	945.54	938.37	941.72	942.74	942.2	941.97	643.929	652.57	540.036	1039.34	950.779	857.979	34.92	34.55	28.08	56.05	50.27	45.01	780.773	0.633331	0.135333	4.67979	2.8717e-06	0.000292013
ENST00000470551.1	DNAJC5-202	protein_coding	DNAJC5	DnaJ heat shock protein family (Hsp40) member C5 [Source:HGNC Symbol;Acc:HGNC:16235]	5108.54	5101.37	5104.72	5105.74	5105.2	5104.97	1603.9	1446.36	1838.55	2236.55	2387.99	2299.44	16.06	14.14	17.63	22.25	23.3	22.26	1968.8	0.500665	0.10711	4.6743	2.94953e-06	0.000298662
ENST00000405140.7	CLU-202	protein_coding	CLU	clusterin [Source:HGNC Symbol;Acc:HGNC:2095]	1919.54	1912.37	1915.72	1916.74	1916.2	1915.97	1717.36	1777.7	2170.58	2577.28	3475.15	3846.74	45.82	46.31	55.46	68.34	90.35	99.22	2594.14	0.804992	0.172345	4.67083	2.99992e-06	0.000302487
ENST00000620149.1	SPTSSB-205	protein_coding	SPTSSB	serine palmitoyltransferase small subunit B [Source:HGNC Symbol;Acc:HGNC:24045]	60.14	55.63	57.52	58.26	57.68	57.81	129.102	153.395	123.491	235.436	265.402	235.812	113.75	132.4	104.83	206.77	228.13	201.75	190.44	0.862568	0.185012	4.66224	3.12792e-06	0.000314075
ENST00000487862.5	GNAS-245	protein_coding	GNAS	GNAS complex locus [Source:HGNC Symbol;Acc:HGNC:4392]	1603.54	1596.37	1599.72	1600.74	1600.2	1599.97	1639.04	1733.22	1721.82	1230.62	1358.71	1376.13	52.34	54.08	52.68	39.09	42.31	42.52	1509.92	-0.360777	0.0774831	-4.6562	3.221e-06	0.000322073
ENST00000379819.5	APTX-205	protein_coding	APTX	aprataxin [Source:HGNC Symbol;Acc:HGNC:15984]	1641.54	1634.37	1637.72	1638.74	1638.2	1637.97	114.337	168.232	127.882	281.102	255.265	285.705	3.56	5.14	3.82	8.72	7.75	8.61	205.42	1.00932	0.216944	4.65243	3.28053e-06	0.000326664
ENST00000414849.6	NUSAP1-202	protein_coding	NUSAP1	nucleolar and spindle associated protein 1 [Source:HGNC Symbol;Acc:HGNC:18538]	2095.54	2088.37	2091.72	2092.74	2092.2	2091.97	1671.15	1806.75	1702.5	1427.09	1324.97	1284.42	40.83	43.1	39.84	34.65	31.55	30.35	1536.15	-0.359845	0.0775768	-4.63856	3.50844e-06	0.000347916
ENST00000220584.8	FDFT1-201	protein_coding	FDFT1	farnesyl-diphosphate farnesyltransferase 1 [Source:HGNC Symbol;Acc:HGNC:3629]	1997.54	1990.37	1993.72	1994.74	1994.2	1993.97	1590.59	1530.4	1627.3	1998.97	1897.63	2141.53	40.77	38.32	39.94	50.94	47.41	53.08	1797.74	0.347906	0.075203	4.62622	3.72392e-06	0.000367764
ENST00000206451.10	PSME1-201	protein_coding	PSME1	proteasome activator subunit 1 [Source:HGNC Symbol;Acc:HGNC:9568]	827.54	820.37	823.72	824.74	824.2	823.97	9251.86	10139.3	9824.85	12034.4	12011.5	11071.2	573.8	614.12	583.61	741.96	726.09	664.02	10722.2	0.265245	0.0573628	4.62399	3.7642e-06	0.000370219
ENST00000435794.5	ANKHD1-212	protein_coding	ANKHD1	ankyrin repeat and KH domain containing 1 [Source:HGNC Symbol;Acc:HGNC:24714]	3332.54	3325.37	3328.72	3329.74	3329.2	3328.97	304.926	214.276	275.793	75.1189	129.663	109.694	4.68	3.2	4.05	1.15	1.94	1.63	184.912	-1.34312	0.290545	-4.62276	3.78675e-06	0.000370916
ENST00000263713.9	EPB41L5-201	protein_coding	EPB41L5	erythrocyte membrane protein band 4.1 like 5 [Source:HGNC Symbol;Acc:HGNC:19819]	6449.54	6442.37	6445.72	6446.74	6446.2	6445.97	456.275	621.064	495.564	839.265	823.913	857.887	3.62	4.81	3.76	6.61	6.37	6.58	682.328	0.683601	0.14827	4.61052	4.0166e-06	0.000391831
ENST00000314332.5	HIST1H2BC-201	protein_coding	HIST1H2BC	histone cluster 1 H2B family member c [Source:HGNC Symbol;Acc:HGNC:4757]	480.59	473.42	476.77	477.79	477.24	477.02	122.64	138.512	163.911	240.097	297.088	293.94	13.11	14.55	16.78	25.61	31.01	30.49	209.365	0.965753	0.209516	4.60944	4.03748e-06	0.000392273
ENST00000254654.7	ILKAP-201	protein_coding	ILKAP	ILK associated serine/threonine phosphatase [Source:HGNC Symbol;Acc:HGNC:15566]	1311.54	1304.37	1307.72	1308.74	1308.2	1307.97	489.244	471.093	482.301	345.442	311.985	343.016	19.1	17.97	18.03	13.42	11.87	12.96	407.18	-0.525125	0.114022	-4.60545	4.11569e-06	0.000398259
ENST00000343776.9	ZNF678-201	protein_coding	ZNF678	zinc finger protein 678 [Source:HGNC Symbol;Acc:HGNC:28652]	8377.54	8370.37	8373.72	8374.74	8374.2	8373.97	407.119	385.437	533.163	174.94	243.123	231.661	2.48	2.3	3.12	1.06	1.45	1.37	329.241	-1.03104	0.224248	-4.59776	4.27054e-06	0.000411584
ENST00000389044.8	TRIP12-203	protein_coding	TRIP12	thyroid hormone receptor interactor 12 [Source:HGNC Symbol;Acc:HGNC:12306]	6226.54	6219.37	6222.72	6223.74	6223.2	6222.97	483.106	412.549	584.149	1114.01	752.327	1155.86	3.97	3.31	4.59	9.1	6.02	9.18	750.332	1.03033	0.224171	4.59616	4.30348e-06	0.0004131
ENST00000258382.9	SP110-202	protein_coding	SP110	SP110 nuclear body protein [Source:HGNC Symbol;Acc:HGNC:5401]	1901.54	1894.37	1897.72	1898.74	1898.2	1897.97	1402.81	1593.75	1548.75	2134.13	2313.61	1903.32	37.78	41.92	39.95	57.12	60.7	49.56	1816.06	0.481563	0.10502	4.58542	4.53066e-06	0.000433174
ENST00000218348.7	USP11-201	protein_coding	USP11	ubiquitin specific peptidase 11 [Source:HGNC Symbol;Acc:HGNC:12609]	3159.54	3152.37	3155.72	3156.74	3156.2	3155.97	2166.55	1885.74	1959.81	2471.39	2664.84	2594.18	35.08	29.83	30.4	39.79	42.06	40.63	2290.42	0.361707	0.0789333	4.58243	4.59598e-06	0.000437676
ENST00000578542.5	PRR11-203	protein_coding	PRR11	proline rich 11 [Source:HGNC Symbol;Acc:HGNC:25619]	2155.54	2148.37	2151.72	2152.74	2152.2	2151.97	1143.94	1073.16	1138.34	903.476	856.3	873.473	27.17	24.89	25.89	21.32	19.82	20.05	998.116	-0.35014	0.0764254	-4.58147	4.61727e-06	0.000437965
ENST00000340852.9	HM13-202	protein_coding	HM13	histocompatibility minor 13 [Source:HGNC Symbol;Acc:HGNC:16435]	1427.54	1420.37	1423.72	1424.74	1424.2	1423.97	3184.34	3226.86	3456.28	3808.6	4054.48	4027.75	114.28	113.08	118.8	135.89	141.82	139.79	3626.38	0.268567	0.0586859	4.57636	4.73141e-06	0.000446232
ENST00000370481.8	GBP3-202	protein_coding	GBP3	guanylate binding protein 3 [Source:HGNC Symbol;Acc:HGNC:4184]	2888.54	2881.37	2884.72	2885.74	2885.2	2884.97	1104.17	1275.73	1196.79	1703	1997.61	1575.01	19.57	22.08	20.3	30	34.48	26.99	1475.39	0.559666	0.122307	4.57591	4.74161e-06	0.000446232
ENST00000335514.9	ATPIF1-201	protein_coding	ATPIF1	ATPase inhibitory factor 1 [Source:HGNC Symbol;Acc:HGNC:871]	315.71	308.58	311.9	312.91	312.37	312.16	1621.11	1626.72	1609.66	1894.82	1938.95	1904.65	265.28	260.09	252.37	308.36	309.31	301.46	1765.99	0.24006	0.052479	4.5744	4.77591e-06	0.000447704
ENST00000585812.5	BCAS3-205	protein_coding	BCAS3	BCAS3, microtubule associated cell migration factor [Source:HGNC Symbol;Acc:HGNC:14347]	2035.54	2028.37	2031.72	2032.74	2032.2	2031.97	159.958	83.5145	173.845	306.876	479.472	476.441	4.02	2.06	4.2	7.68	11.75	11.6	280.018	1.59321	0.348588	4.57045	4.86679e-06	0.000454448
ENST00000313269.5	GRINA-201	protein_coding	GRINA	glutamate ionotropic receptor NMDA type subunit associated protein 1 [Source:HGNC Symbol;Acc:HGNC:4589]	1789.54	1782.37	1785.72	1786.74	1786.2	1785.97	477.081	320.596	354.386	673.81	742.839	672.099	13.65	8.95	9.7	19.18	20.7	18.59	540.135	0.856017	0.187437	4.56695	4.94862e-06	0.000460298
ENST00000373509.5	PIM1-201	protein_coding	PIM1	Pim-1 proto-oncogene, serine/threonine kinase [Source:HGNC Symbol;Acc:HGNC:8986]	2471.54	2464.37	2467.72	2468.74	2468.2	2467.97	539.014	490.771	539.906	370.204	376.828	351.188	11.15	9.93	10.7	7.61	7.61	7.04	444.652	-0.519468	0.113948	-4.55883	5.144e-06	0.000476625
ENST00000618863.1	IFI27-212	protein_coding	IFI27	interferon alpha inducible protein 27 [Source:HGNC Symbol;Acc:HGNC:5397]	326.69	319.56	322.89	323.89	323.35	323.14	4484.31	4308.47	3917.64	5965.54	6119.42	5086.69	709.1	665.23	593.28	937.68	943.03	777.81	4980.34	0.433546	0.0953292	4.54788	5.41894e-06	0.000500168
ENST00000380276.6	U2AF1-202	protein_coding	U2AF1	U2 small nuclear RNA auxiliary factor 1 [Source:HGNC Symbol;Acc:HGNC:12453]	761.55	754.37	757.73	758.74	758.2	757.97	189.798	203.772	208.174	295.987	360.585	330.759	12.8	13.43	13.44	19.85	23.71	21.58	264.846	0.712528	0.157376	4.52756	5.96683e-06	0.000546534
ENST00000404525.5	LTBP1-202	protein_coding	LTBP1	latent transforming growth factor beta binding protein 1 [Source:HGNC Symbol;Acc:HGNC:6714]	4913.54	4906.37	4909.72	4910.74	4910.2	4909.97	499.135	597.502	567.444	361.667	347.122	275.868	5.19	6.07	5.65	3.75	3.52	2.78	441.456	-0.760316	0.167925	-4.52771	5.96257e-06	0.000546534
ENST00000314797.10	COPG1-201	protein_coding	COPG1	coatomer protein complex subunit gamma 1 [Source:HGNC Symbol;Acc:HGNC:2236]	2899.54	2892.37	2895.72	2896.74	2896.2	2895.97	6667.09	6250.01	6492.93	7328.17	7908.05	8255.72	117.66	107.72	109.75	128.57	136.03	140.9	7150.33	0.275398	0.0608684	4.52448	6.05452e-06	0.000552457
ENST00000556539.5	STAT2-207	protein_coding	STAT2	signal transducer and activator of transcription 2 [Source:HGNC Symbol;Acc:HGNC:11363]	3099.54	3092.37	3095.72	3096.74	3096.2	3095.97	1042.57	1066.96	917.645	1518.45	1546.5	1295.04	17.21	17.2	14.5	24.91	24.88	20.67	1231.19	0.525687	0.116233	4.52271	6.1053e-06	0.000554981
ENST00000492933.5	PSMD6-210	protein_coding	PSMD6	proteasome 26S subunit, non-ATPase 6 [Source:HGNC Symbol;Acc:HGNC:9564]	1316.54	1309.37	1312.72	1313.74	1313.2	1312.97	1022.24	1137.62	1030.64	1477.25	1339.78	1370.43	39.8	43.23	38.42	57.15	50.82	51.59	1229.66	0.394134	0.087439	4.50754	6.55845e-06	0.000593923
ENST00000361566.7	KRT19-201	protein_coding	KRT19	keratin 19 [Source:HGNC Symbol;Acc:HGNC:6436]	1211.54	1204.37	1207.72	1208.74	1208.2	1207.97	53013.4	51294.6	51697.7	56536.5	62441.1	61175.2	2242.81	2119.36	2094.76	2377.67	2574.65	2502.8	56026.4	0.207572	0.0460753	4.50507	6.6352e-06	0.000598614
ENST00000320580.8	PACS1-201	protein_coding	PACS1	phosphofurin acidic cluster sorting protein 1 [Source:HGNC Symbol;Acc:HGNC:30032]	4213.54	4206.37	4209.72	4210.74	4210.2	4209.97	3066.02	2892.05	3091.31	2285.85	2516.29	2523.75	37.23	34.29	35.94	27.58	29.77	29.63	2729.21	-0.305315	0.0678144	-4.50221	6.7249e-06	0.000604435
ENST00000619895.4	TMC4-210	protein_coding	TMC4	transmembrane channel like 4 [Source:HGNC Symbol;Acc:HGNC:22998]	2194.54	2187.37	2190.72	2191.74	2191.2	2190.97	985.783	1074.26	1078.16	1283.33	1401.96	1426.04	23	24.47	24.08	29.75	31.87	32.17	1208.26	0.390328	0.0867929	4.49724	6.88424e-06	0.000616448
ENST00000367800.8	AHI1-204	protein_coding	AHI1	Abelson helper integration site 1 [Source:HGNC Symbol;Acc:HGNC:21575]	5742.54	5735.37	5738.72	5739.74	5739.2	5738.97	188.76	101.452	137.89	34.3429	54.027	45.0228	1.68	0.88	1.17	0.31	0.46	0.39	93.5824	-1.68978	0.377134	-4.48058	7.44394e-06	0.000664088
ENST00000394853.8	PPP3CA-202	protein_coding	PPP3CA	protein phosphatase 3 catalytic subunit alpha [Source:HGNC Symbol;Acc:HGNC:9314]	3425.54	3418.37	3421.72	3422.74	3422.2	3421.97	642.955	585.294	586.684	798.411	813.095	899.65	9.61	8.54	8.39	11.86	11.84	12.99	721.015	0.469906	0.10491	4.47915	7.49414e-06	0.000665917
ENST00000395863.7	BMP7-201	protein_coding	BMP7	bone morphogenetic protein 7 [Source:HGNC Symbol;Acc:HGNC:1074]	3834.54	3827.37	3830.72	3831.74	3831.2	3830.97	684.163	700.241	630.135	473.261	406.549	341.358	9.12	9.12	8.05	6.28	5.28	4.4	539.285	-0.72422	0.161738	-4.47773	7.54409e-06	0.000665917
ENST00000560741.5	ISG20-210	protein_coding	ISG20	interferon stimulated exonuclease gene 20 [Source:HGNC Symbol;Acc:HGNC:6130]	621.56	614.38	617.74	618.75	618.21	617.98	204.735	202.866	196.49	363.479	392.984	294.746	16.94	16.41	15.57	29.85	31.63	23.54	275.883	0.794845	0.177515	4.47763	7.54769e-06	0.000665917
ENST00000614063.4	PARG-206	protein_coding	PARG	poly(ADP-ribose) glycohydrolase [Source:HGNC Symbol;Acc:HGNC:8605]	3294.54	3287.37	3290.72	3291.74	3291.2	3290.97	241.434	231.195	207.263	130.921	81.0393	87.5912	3.76	3.51	3.08	2.03	1.24	1.32	163.241	-1.18054	0.263765	-4.47572	7.61546e-06	0.000669436
ENST00000258884.4	ABHD17C-201	protein_coding	ABHD17C	abhydrolase domain containing 17C [Source:HGNC Symbol;Acc:HGNC:26925]	2189.54	2182.37	2185.72	2186.74	2186.2	2185.97	638.12	654.488	717.938	497.88	447.059	478.895	14.92	14.94	16.07	11.58	10.19	10.83	572.397	-0.496712	0.111055	-4.47265	7.72544e-06	0.000676624
ENST00000409663.7	TMEM131L-202	protein_coding	TMEM131L	transmembrane 131 like [Source:HGNC Symbol;Acc:HGNC:29146]	4838.54	4831.37	4834.72	4835.74	4835.2	4834.97	271.927	262.679	260.74	378.837	497.046	427.309	2.88	2.71	2.64	3.98	5.13	4.37	349.756	0.709585	0.15879	4.46869	7.86984e-06	0.000686765
ENST00000590654.1	GALNT1-204	protein_coding	GALNT1	polypeptide N-acetylgalactosaminyltransferase 1 [Source:HGNC Symbol;Acc:HGNC:4123]	1591.54	1584.37	1587.72	1588.74	1588.2	1587.97	128.62	137.757	150.451	68.6654	72.9327	66.3099	4.13	4.34	4.65	2.21	2.29	2.06	104.123	-1.00851	0.225815	-4.4661	7.96595e-06	0.000692633
ENST00000311481.10	RAB1B-201	protein_coding	RAB1B	RAB1B, member RAS oncogene family [Source:HGNC Symbol;Acc:HGNC:18370]	1828.54	1821.37	1824.72	1825.74	1825.2	1824.97	8879.08	8086.78	8651.48	9707.01	10233.6	10553	248.66	221.17	232.05	270.22	279.32	285.78	9351.83	0.25123	0.0564613	4.44959	8.60338e-06	0.000743421
ENST00000470610.6	EPHA6-202	protein_coding	EPHA6	EPH receptor A6 [Source:HGNC Symbol;Acc:HGNC:19296]	1879.54	1872.37	1875.72	1876.74	1876.2	1875.97	203.716	159.153	182.206	75.1075	29.7136	60.5787	5.54	4.24	4.75	2.05	0.78	1.6	118.413	-1.70997	0.384317	-4.44938	8.61202e-06	0.000743421
ENST00000536364.5	BTBD6-205	protein_coding	BTBD6	BTB domain containing 6 [Source:HGNC Symbol;Acc:HGNC:19897]	1794.54	1787.37	1790.72	1791.74	1791.2	1790.97	72.3666	65.4734	88.5963	309.009	166.126	181.737	2.06	1.83	2.42	8.78	4.61	5.01	147.218	1.5342	0.344957	4.4475	8.68755e-06	0.000747254
ENST00000313028.11	PARP10-201	protein_coding	PARP10	poly(ADP-ribose) polymerase family member 10 [Source:HGNC Symbol;Acc:HGNC:25895]	3318.54	3311.37	3314.72	3315.74	3315.2	3314.97	2767.57	2527.34	2243.11	3669.02	3373.94	3244.97	42.67	38.05	33.12	56.22	50.69	48.38	2970.99	0.448713	0.101166	4.43541	9.18963e-06	0.000787617
ENST00000289316.2	HIST1H2BD-201	protein_coding	HIST1H2BD	histone cluster 1 H2B family member d [Source:HGNC Symbol;Acc:HGNC:4747]	610.56	603.39	606.74	607.75	607.21	606.99	1483.74	1636.69	1673.96	1939.6	2148.59	2136.89	124.9	134.58	134.98	162.33	176.3	173.94	1836.58	0.376842	0.0849819	4.43438	9.23362e-06	0.000788571
ENST00000360612.4	PIM3-201	protein_coding	PIM3	Pim-3 proto-oncogene, serine/threonine kinase [Source:HGNC Symbol;Acc:HGNC:19310]	2190.54	2183.37	2186.72	2187.74	2187.2	2186.97	1227.09	1094.57	1080.67	1426.04	1612.65	1516.91	28.69	24.99	24.19	33.13	36.73	34.27	1326.32	0.419938	0.0947717	4.43104	9.37783e-06	0.000798047
ENST00000407280.3	IFI30-201	protein_coding	IFI30	IFI30, lysosomal thiol reductase [Source:HGNC Symbol;Acc:HGNC:5398]	955.54	948.37	951.72	952.74	952.2	951.97	3666.61	3251.41	3300.39	4367.64	4046.22	4273.51	196.84	170.47	169.7	233.1	211.71	221.83	3817.63	0.312332	0.0705083	4.42971	9.43586e-06	0.000800148
ENST00000433868.5	ATP11C-205	protein_coding	ATP11C	ATPase phospholipid transporting 11C [Source:HGNC Symbol;Acc:HGNC:13554]	2934.54	2927.37	2930.72	2931.74	2931.2	2930.97	297.73	310.183	335.971	209.254	156.675	160.448	5.19	5.28	5.61	3.62	2.67	2.71	245.044	-0.842457	0.190221	-4.42883	9.47436e-06	0.000800584
ENST00000264221.6	PAICS-201	protein_coding	PAICS	phosphoribosylaminoimidazole carboxylase and phosphoribosylaminoimidazolesuccinocarboxamide synthase [Source:HGNC Symbol;Acc:HGNC:8587]	3160.54	3153.37	3156.72	3157.74	3157.2	3156.97	9080.19	9557.29	10097.4	8333.82	7936.43	7640.09	147.01	151.1	156.57	134.11	125.22	119.61	8774.21	-0.265461	0.0600073	-4.42381	9.69772e-06	0.000816582
ENST00000615720.4	METTL9-211	protein_coding	METTL9	methyltransferase like 9 [Source:HGNC Symbol;Acc:HGNC:24586]	2711.54	2704.37	2707.72	2708.74	2708.2	2707.97	638.314	647.505	685.32	494.689	471.375	496.9	12.05	11.93	12.39	9.28	8.67	9.07	572.351	-0.42892	0.097035	-4.42026	9.85827e-06	0.000827198
ENST00000368947.8	ANXA9-201	protein_coding	ANXA9	annexin A9 [Source:HGNC Symbol;Acc:HGNC:547]	1647.54	1640.37	1643.72	1644.74	1644.2	1643.97	5407.8	5615.95	5654.39	6229.33	6869.19	6527.01	168.1	170.51	168.36	192.52	208.11	196.23	6050.61	0.234315	0.0530508	4.4168	1.00173e-05	0.000837611
ENST00000286713.6	STOM-201	protein_coding	STOM	stomatin [Source:HGNC Symbol;Acc:HGNC:3383]	2831.54	2824.37	2827.72	2828.74	2828.2	2827.97	1397.39	1716.8	1674.01	2074.28	2317.71	2267.56	25.25	30.29	28.98	37.27	40.82	39.62	1907.96	0.476293	0.108045	4.40828	1.04195e-05	0.000865216
ENST00000522656.5	SLC7A2-205	protein_coding	SLC7A2	solute carrier family 7 member 2 [Source:HGNC Symbol;Acc:HGNC:11060]	2095.54	2088.37	2091.72	2092.74	2092.2	2091.97	597.86	593.599	584.217	798.314	737.443	829.268	14.6	14.16	13.67	19.38	17.55	19.59	690.117	0.41664	0.0945073	4.40855	1.04067e-05	0.000865216
ENST00000217086.8	SALL4-201	protein_coding	SALL4	spalt like transcription factor 4 [Source:HGNC Symbol;Acc:HGNC:15924]	5029.54	5022.37	5025.72	5026.74	5026.2	5025.97	287.142	319.038	260.74	525.867	428.162	452.685	2.92	3.17	2.54	5.31	4.25	4.46	378.939	0.701812	0.159321	4.40501	1.05778e-05	0.00086934
ENST00000373391.6	ZFAND3-203	protein_coding	ZFAND3	zinc finger AN1-type containing 3 [Source:HGNC Symbol;Acc:HGNC:18019]	2822.54	2815.37	2818.72	2819.74	2819.2	2818.97	844.87	1130.25	829.902	498.986	615.895	474.796	15.32	20.01	14.41	8.99	10.88	8.33	732.45	-0.820656	0.186281	-4.40548	1.0555e-05	0.00086934
ENST00000605886.1	AL365181.3-201	antisense_RNA	AL365181.3		3043.54	3036.37	3039.72	3040.74	3040.2	3039.97	204.754	215.427	178.849	298.324	345.767	361.008	3.44	3.54	2.88	4.99	5.66	5.87	267.355	0.750195	0.170258	4.40623	1.05186e-05	0.00086934
ENST00000374253.9	CNKSR1-202	protein_coding	CNKSR1	connector enhancer of kinase suppressor of Ras 1 [Source:HGNC Symbol;Acc:HGNC:19700]	2359.54	2352.37	2355.72	2356.74	2356.2	2355.97	77.763	99.2895	117.008	262.895	287.686	180.097	1.69	2.12	2.44	5.68	6.08	3.78	170.79	1.30869	0.297148	4.40417	1.06191e-05	0.000869748
ENST00000439696.2	ZFP36L1-202	protein_coding	ZFP36L1	ZFP36 ring finger protein like 1 [Source:HGNC Symbol;Acc:HGNC:1107]	3011.54	3004.37	3007.72	3008.74	3008.2	3007.97	4554.6	4520.63	4529.74	4087.46	4042.5	3885.95	77.38	75.02	73.71	69.04	66.94	63.84	4270.15	-0.180258	0.0409956	-4.39701	1.09751e-05	0.000895851
ENST00000617285.4	HYOU1-220	protein_coding	HYOU1	hypoxia up-regulated 1 [Source:HGNC Symbol;Acc:HGNC:16931]	4350.54	4343.37	4346.72	4347.74	4347.2	4346.97	6337.91	6405.17	6613	7104.43	7559.68	7631.83	74.52	73.55	74.46	83.04	86.63	86.77	6942	0.20394	0.0464271	4.39269	1.11959e-05	0.000910775
ENST00000629992.2	PLCB1-218	protein_coding	PLCB1	phospholipase C beta 1 [Source:HGNC Symbol;Acc:HGNC:15917]	2916.54	2909.37	2912.72	2913.74	2913.2	2912.97	156.464	173.704	168.821	97.6518	85.0909	77.7682	2.75	2.99	2.83	1.69	1.46	1.32	126.583	-0.940382	0.214325	-4.38764	1.14589e-05	0.000929024
ENST00000396825.3	FITM2-201	protein_coding	FITM2	fat storage inducing transmembrane protein 2 [Source:HGNC Symbol;Acc:HGNC:16135]	4418.54	4411.37	4414.72	4415.74	4415.2	4414.97	593.012	646.034	670.241	431.418	456.525	472.333	6.86	7.3	7.43	4.96	5.15	5.29	544.927	-0.48804	0.111328	-4.3838	1.16626e-05	0.000939394
ENST00000521988.5	TRIQK-214	protein_coding	TRIQK	triple QxxK/R motif containing [Source:HGNC Symbol;Acc:HGNC:27828]	3493.54	3486.37	3489.72	3490.74	3490.2	3489.97	491.839	660.838	622.619	386.329	329.56	339.722	7.2	9.44	8.73	5.63	4.71	4.81	471.818	-0.748527	0.17075	-4.38375	1.16651e-05	0.000939394
ENST00000371818.8	IFIT3-202	protein_coding	IFIT3	interferon induced protein with tetratricopeptide repeats 3 [Source:HGNC Symbol;Acc:HGNC:5411]	2317.54	2310.37	2313.72	2314.74	2314.2	2313.97	1934.19	2676.38	2001.68	3915.5	4177.51	3044.45	42.72	57.73	42.33	85.97	89.92	65.02	2958.29	0.752283	0.171993	4.37391	1.22041e-05	0.000979511
ENST00000506799.5	NLN-205	protein_coding	NLN	neurolysin [Source:HGNC Symbol;Acc:HGNC:16058]	1906.54	1899.37	1902.72	1903.74	1903.2	1902.97	805.058	881.526	875.923	655.584	659.103	642.625	21.61	23.11	22.53	17.49	17.27	16.69	753.303	-0.38891	0.0890416	-4.36774	1.25539e-05	0.00100423
ENST00000251496.6	NCAPG-201	protein_coding	NCAPG	non-SMC condensin I complex subunit G [Source:HGNC Symbol;Acc:HGNC:24304]	4482.54	4475.37	4478.72	4479.74	4479.2	4478.97	996.415	938.034	997.004	793.081	723.957	746.565	11.37	10.45	10.89	8.99	8.06	8.24	865.842	-0.373114	0.0854752	-4.36517	1.27025e-05	0.00100938
ENST00000457855.1	BRPF1-206	protein_coding	BRPF1	bromodomain and PHD finger containing 1 [Source:HGNC Symbol;Acc:HGNC:14255]	4129.54	4122.37	4125.72	4126.74	4126.2	4125.97	475.815	387.869	501.43	297.267	243.119	224.297	5.9	4.69	5.95	3.66	2.94	2.69	354.966	-0.839063	0.192212	-4.36531	1.26944e-05	0.00100938
ENST00000552819.5	PCBP2-223	protein_coding	PCBP2	poly(rC) binding protein 2 [Source:HGNC Symbol;Acc:HGNC:8648]	1239.54	1232.37	1235.72	1236.74	1236.2	1235.97	5080.04	5229.21	5168.32	5641.7	5814.24	5780.54	210.06	211.17	204.67	231.89	234.32	231.15	5452.34	0.155457	0.0356804	4.35693	1.31899e-05	0.00104466
ENST00000281038.9	NARS2-201	protein_coding	NARS2	asparaginyl-tRNA synthetase 2, mitochondrial (putative) [Source:HGNC Symbol;Acc:HGNC:26274]	2340.54	2333.37	2336.72	2337.74	2337.2	2336.97	832.143	807.866	931.053	629.873	640.201	631.976	18.2	17.25	19.5	13.69	13.65	13.36	745.519	-0.436618	0.10063	-4.33886	1.43221e-05	0.00112321
ENST00000360816.7	FAM217B-202	protein_coding	FAM217B	family with sequence similarity 217 member B [Source:HGNC Symbol;Acc:HGNC:16170]	4857.54	4850.37	4853.72	4854.74	4854.2	4853.97	2322.12	2474.58	2560.6	2080.92	1897.69	1908.97	24.45	25.45	25.82	21.78	19.48	19.43	2207.48	-0.321428	0.0740572	-4.34027	1.42305e-05	0.00112321
ENST00000510678.5	HNRNPH1-218	protein_coding	HNRNPH1	heterogeneous nuclear ribonucleoprotein H1 [Source:HGNC Symbol;Acc:HGNC:5041]	1817.54	1810.37	1813.72	1814.74	1814.2	1813.97	452.973	431.21	438.801	657.719	730.684	581.23	12.76	11.85	11.84	18.43	20.06	15.82	548.769	0.570068	0.131367	4.33951	1.42803e-05	0.00112321
ENST00000373087.6	ZC3H12A-201	protein_coding	ZC3H12A	zinc finger CCCH-type containing 12A [Source:HGNC Symbol;Acc:HGNC:26259]	2505.54	2498.37	2501.72	2502.74	2502.2	2501.97	837.588	851.78	859.167	1033.35	1131.84	1201.73	17.11	16.99	16.8	20.99	22.55	23.73	985.91	0.402901	0.0929521	4.3345	1.46093e-05	0.001142
ENST00000423485.5	TOP2A-201	protein_coding	TOP2A	topoisomerase (DNA) II alpha [Source:HGNC Symbol;Acc:HGNC:11989]	5579.54	5572.37	5575.72	5576.74	5576.2	5575.97	9001.29	9402.48	10161.2	8207.92	7438.16	7169.27	82.51	84.17	89.2	74.78	66.45	63.55	8563.4	-0.324466	0.0748936	-4.33236	1.47521e-05	0.00114942
ENST00000400822.7	AFDN-207	protein_coding	AFDN	afadin, adherens junction formation factor [Source:HGNC Symbol;Acc:HGNC:7137]	7414.54	7407.37	7410.72	7411.74	7411.2	7410.97	709.513	639.051	666.04	267.237	452.478	325.8	4.9	4.3	4.4	1.83	3.05	2.17	510.02	-0.950316	0.219725	-4.32503	1.52512e-05	0.00118446
ENST00000356142.4	RAC1-202	protein_coding	RAC1	ras-related C3 botulinum toxin substrate 1 (rho family, small GTP binding protein Rac1) [Source:HGNC Symbol;Acc:HGNC:9801]	728.55	721.37	724.73	725.74	725.2	724.97	833.869	856.032	901.27	1072.38	1088.5	1163.39	58.81	58.97	60.87	75.11	74.74	79.32	985.907	0.360501	0.0835133	4.3167	1.58382e-05	0.00122608
ENST00000330714.7	MX2-201	protein_coding	MX2	MX dynamin like GTPase 2 [Source:HGNC Symbol;Acc:HGNC:7533]	2863.54	2856.37	2859.72	2860.74	2860.2	2859.97	178.812	178.22	173.836	387.386	356.571	261.956	3.19	3.12	2.98	6.88	6.21	4.53	256.13	0.918922	0.213045	4.31328	1.60854e-05	0.00124121
ENST00000320486.6	ERCC6L2-202	protein_coding	ERCC6L2	ERCC excision repair 6 like 2 [Source:HGNC Symbol;Acc:HGNC:26922]	2757.54	2750.37	2753.72	2754.74	2754.2	2753.97	192.214	203.046	221.475	125.551	110.753	118.699	3.57	3.68	3.94	2.32	2.01	2.13	161.956	-0.795005	0.18464	-4.30571	1.66452e-05	0.00128029
ENST00000396334.7	MYD88-201	protein_coding	MYD88	myeloid differentiation primary response 88 [Source:HGNC Symbol;Acc:HGNC:7562]	2671.54	2664.37	2667.72	2668.74	2668.2	2667.97	1654.76	1649.25	1707.45	1932.61	2061.08	2143.96	31.69	30.86	31.33	36.8	38.48	39.72	1858.19	0.292847	0.0680684	4.30225	1.69076e-05	0.00129632
ENST00000515673.6	RNF150-206	protein_coding	RNF150	ring finger protein 150 [Source:HGNC Symbol;Acc:HGNC:23138]	9626.54	9619.37	9622.72	9623.74	9623.2	9622.97	757.909	921.84	1005.32	583.856	588.898	596.752	4.03	4.78	5.11	3.08	3.05	3.07	742.429	-0.601433	0.139949	-4.2975	1.72736e-05	0.00132016
ENST00000262293.8	PRR11-201	protein_coding	PRR11	proline rich 11 [Source:HGNC Symbol;Acc:HGNC:25619]	2153.54	2146.37	2149.72	2150.74	2150.2	2149.97	1651.56	1530.19	1735.93	1343.41	1207.46	1219.75	39.26	35.51	39.51	31.74	27.98	28.04	1448.05	-0.383982	0.0893667	-4.2967	1.73357e-05	0.00132071
ENST00000274276.7	OSMR-201	protein_coding	OSMR	oncostatin M receptor [Source:HGNC Symbol;Acc:HGNC:8507]	5360.54	5353.37	5356.72	5357.74	5357.2	5356.97	1516.28	1687.55	1698.14	2016.56	2179.98	2020.3	14.46	15.73	15.52	19.13	20.27	18.64	1853.14	0.342094	0.0796532	4.29479	1.74859e-05	0.00132793
ENST00000511425.5	IFT122-222	protein_coding	IFT122	intraflagellar transport 122 [Source:HGNC Symbol;Acc:HGNC:13556]	2046.54	2039.37	2042.72	2043.74	2043.2	2042.97	116.172	100.442	124.533	192.066	201.243	212.024	2.9	2.46	2.99	4.78	4.9	5.12	157.747	0.823864	0.191877	4.29371	1.75715e-05	0.00133023
ENST00000315467.8	GCSH-201	protein_coding	GCSH	glycine cleavage system protein H [Source:HGNC Symbol;Acc:HGNC:4208]	1418.54	1411.37	1414.72	1415.74	1415.2	1414.97	1554.64	1563.2	1599.84	1328.18	1274.96	1330.3	56.15	55.14	55.33	47.68	44.87	46.46	1441.85	-0.261106	0.0608745	-4.28925	1.79279e-05	0.00135294
ENST00000392657.7	ARHGAP32-202	protein_coding	ARHGAP32	Rho GTPase activating protein 32 [Source:HGNC Symbol;Acc:HGNC:17399]	6377.54	6370.37	6373.72	6374.74	6374.2	6373.97	250.503	262.63	252.379	362.751	366.033	368.368	2.01	2.06	1.94	2.89	2.86	2.86	310.444	0.520711	0.122053	4.26627	1.9877e-05	0.00149533
ENST00000261646.9	SREBF1-201	protein_coding	SREBF1	sterol regulatory element binding transcription factor 1 [Source:HGNC Symbol;Acc:HGNC:11289]	3999.54	3992.37	3995.72	3996.74	3996.2	3995.97	2243.96	1972.1	1924.66	2892.17	2573.01	2617.08	28.71	24.63	23.58	36.77	32.07	32.37	2370.5	0.396308	0.0929176	4.26515	1.99766e-05	0.00149812
ENST00000252444.9	LDLR-201	protein_coding	LDLR	low density lipoprotein receptor [Source:HGNC Symbol;Acc:HGNC:6547]	5158.54	5151.37	5154.72	5155.74	5155.2	5154.97	2344.58	1997.61	2397.63	2862.23	2951.22	3258.02	23.24	19.34	22.76	28.21	28.52	31.24	2635.22	0.42834	0.100511	4.26163	2.0294e-05	0.00151718
ENST00000167462.9	LLGL2-201	protein_coding	LLGL2	LLGL2, scribble cell polarity complex component [Source:HGNC Symbol;Acc:HGNC:6629]	3301.54	3294.37	3297.72	3298.74	3298.2	3297.97	1504.94	1048.84	1075.59	1911.24	1892.27	2019.51	23.32	15.87	15.97	29.44	28.58	30.26	1575.4	0.681759	0.160064	4.25929	2.05081e-05	0.00152589
ENST00000356309.7	NCAPG2-201	protein_coding	NCAPG2	non-SMC condensin II complex subunit G2 [Source:HGNC Symbol;Acc:HGNC:21904]	3751.54	3744.37	3747.72	3748.74	3748.2	3747.97	3170.34	2976.94	3302.78	2441.42	2606.77	2169.31	43.23	39.64	43.14	33.09	34.64	28.61	2777.93	-0.390795	0.0917583	-4.25896	2.05376e-05	0.00152589
ENST00000504930.5	POLR3G-204	protein_coding	POLR3G	RNA polymerase III subunit G [Source:HGNC Symbol;Acc:HGNC:30075]	3072.54	3065.37	3068.72	3069.74	3069.2	3068.97	128.755	170.309	191.385	76.1908	63.4806	77.7681	2.15	2.76	3.05	1.26	1.03	1.25	117.981	-1.16768	0.2743	-4.25692	2.07261e-05	0.00153514
ENST00000395715.7	TRPS1-203	protein_coding	TRPS1	transcriptional repressor GATA binding 1 [Source:HGNC Symbol;Acc:HGNC:12340]	9811.54	9804.37	9807.72	9808.74	9808.2	9807.97	1343.13	1324.15	1388.89	1620.63	1589.76	1687.93	7	6.74	6.93	8.39	8.07	8.51	1492.41	0.273011	0.0642292	4.25059	2.13213e-05	0.00157436
ENST00000273347.9	NXPE3-201	protein_coding	NXPE3	neurexophilin and PC-esterase domain family member 3 [Source:HGNC Symbol;Acc:HGNC:28238]	3762.54	3755.37	3758.72	3759.74	3759.2	3758.97	329.108	360.84	361.033	468.967	515.952	552.559	4.47	4.8	4.7	6.33	6.84	7.27	431.41	0.550883	0.129643	4.24924	2.14496e-05	0.00157838
ENST00000296543.9	NAA15-201	protein_coding	NAA15	N(alpha)-acetyltransferase 15, NatA auxiliary subunit [Source:HGNC Symbol;Acc:HGNC:30782]	6043.54	6036.37	6039.72	6040.74	6040.2	6039.97	2699.09	2973.56	3293.47	2240.89	2298.85	2326.45	22.84	24.57	26.69	18.85	18.96	19.04	2638.72	-0.385066	0.0906327	-4.24864	2.15073e-05	0.00157838
ENST00000366577.9	MTR-202	protein_coding	MTR	5-methyltetrahydrofolate-homocysteine methyltransferase [Source:HGNC Symbol;Acc:HGNC:7468]	10350.5	10343.4	10346.7	10347.7	10347.2	10347	1450.53	1479.64	1315.35	958.43	850.932	1105.1	7.16	7.14	6.22	4.71	4.1	5.28	1193.33	-0.539384	0.127086	-4.24423	2.19342e-05	0.0016048
ENST00000262138.3	CACNG4-201	protein_coding	CACNG4	calcium voltage-gated channel auxiliary subunit gamma 4 [Source:HGNC Symbol;Acc:HGNC:1408]	3201.54	3194.37	3197.72	3198.74	3198.2	3197.97	5538.5	5422.56	6045.73	4569.34	4709.73	4881.37	88.51	84.63	92.54	72.59	73.36	75.44	5194.54	-0.264333	0.0623437	-4.23993	2.23588e-05	0.0016309
ENST00000322203.6	RPL10A-201	protein_coding	RPL10A	ribosomal protein L10a [Source:HGNC Symbol;Acc:HGNC:10299]	537.57	530.4	533.75	534.77	534.23	534	14597.5	14139.2	14714	12473	12851.9	13338.4	1396.87	1321.32	1348.51	1186.45	1198.64	1234.28	13685.7	-0.168294	0.0397199	-4.23701	2.26521e-05	0.00164406
ENST00000347615.6	SMG7-201	protein_coding	SMG7	SMG7, nonsense mediated mRNA decay factor [Source:HGNC Symbol;Acc:HGNC:16792]	5609.54	5602.37	5605.72	5606.74	5606.2	5605.97	3559.56	3762.78	4038.09	4447.39	4739.51	4994.26	32.45	33.5	35.26	40.3	42.12	44.03	4256.93	0.320136	0.0755614	4.23677	2.26762e-05	0.00164406
ENST00000259457.7	PSMB7-201	protein_coding	PSMB7	proteasome subunit beta 7 [Source:HGNC Symbol;Acc:HGNC:9544]	801.54	794.37	797.72	798.74	798.2	797.97	4047.31	3716.76	4185.99	3275.29	3153.44	3379.59	259.18	232.46	256.76	208.53	196.86	209.29	3626.4	-0.284827	0.0672817	-4.23335	2.30236e-05	0.00165943
ENST00000571589.5	MKL2-202	protein_coding	MKL2	MKL1/myocardin like 2 [Source:HGNC Symbol;Acc:HGNC:29819]	8620.54	8613.37	8616.72	8617.74	8617.2	8616.97	3041.35	3126.28	3163.88	2650.94	2760.8	2718.54	18.04	18.11	17.97	15.63	15.96	15.6	2910.3	-0.199233	0.0470631	-4.23332	2.30266e-05	0.00165943
ENST00000523539.5	PTK2-246	protein_coding	PTK2	protein tyrosine kinase 2 [Source:HGNC Symbol;Acc:HGNC:9611]	3057.54	3050.37	3053.72	3054.74	3054.2	3053.97	405.039	482.733	386.949	757.614	637.507	616.415	6.78	7.89	6.21	12.6	10.4	9.97	547.71	0.660121	0.156169	4.22696	2.36869e-05	0.00170191
ENST00000334801.7	BCL9L-201	protein_coding	BCL9L	B-cell CLL/lymphoma 9 like [Source:HGNC Symbol;Acc:HGNC:23688]	9826.54	9819.37	9822.72	9823.74	9823.2	9822.97	7395.71	6886.7	7119.11	8090.28	8868.6	9517.74	38.48	34.99	35.48	41.84	44.98	47.89	7979.69	0.307136	0.0727389	4.22244	2.41673e-05	0.00172609
ENST00000371804.3	IFIT1-201	protein_coding	IFIT1	interferon induced protein with tetratricopeptide repeats 1 [Source:HGNC Symbol;Acc:HGNC:5407]	1701.54	1694.37	1697.72	1698.74	1698.2	1697.97	10519.7	13284.7	11432.4	16653.9	17666	14355.6	316.64	390.5	329.57	498.29	518.22	417.84	13985.4	0.466081	0.110378	4.22258	2.41521e-05	0.00172609
ENST00000592339.5	USP32-214	protein_coding	USP32	ubiquitin specific peptidase 32 [Source:HGNC Symbol;Acc:HGNC:19143]	3866.54	3859.37	3862.72	3863.74	3863.2	3862.97	4843.73	4237.5	4011.47	5913.09	5301.35	6146.9	64.09	54.75	50.83	77.77	68.36	78.65	5075.67	0.407567	0.0966442	4.21719	2.47368e-05	0.00176152
ENST00000495544.5	SULF2-212	protein_coding	SULF2	sulfatase 2 [Source:HGNC Symbol;Acc:HGNC:20392]	1371.54	1364.37	1367.72	1368.74	1368.2	1367.97	10057.4	11828.9	11158	8423.83	9350.13	8187.32	375.74	431.58	399.24	312.82	340.44	295.77	9834.28	-0.348299	0.0826869	-4.21227	2.52821e-05	0.00179503
ENST00000372068.6	TMEM164-202	protein_coding	TMEM164	transmembrane protein 164 [Source:HGNC Symbol;Acc:HGNC:26217]	5387.54	5380.37	5383.72	5384.74	5384.2	5383.97	5451.47	5930.66	6042.94	4715.67	5024.5	4896.85	51.75	54.98	54.94	44.5	46.49	44.95	5343.68	-0.251733	0.0597894	-4.21033	2.55e-05	0.00180516
ENST00000584437.5	RNF43-208	protein_coding	RNF43	ring finger protein 43 [Source:HGNC Symbol;Acc:HGNC:18505]	5396.54	5389.37	5392.72	5393.74	5393.2	5392.97	1393.73	1404.6	1468.32	1728.94	1657.27	1723.15	13.21	13	13.33	16.29	15.31	15.79	1562.67	0.260505	0.061946	4.20535	2.60673e-05	0.00183989
ENST00000263980.7	SLC9A1-201	protein_coding	SLC9A1	solute carrier family 9 member A1 [Source:HGNC Symbol;Acc:HGNC:11071]	4337.54	4330.37	4333.72	4334.74	4334.2	4333.97	2438.2	2212.11	2317.43	2781.67	2749.96	2996.9	28.75	25.47	26.18	32.6	31.6	34.17	2582.71	0.292088	0.0694936	4.20309	2.63293e-05	0.00184752
ENST00000560681.1	B2M-210	protein_coding	B2M	beta-2-microglobulin [Source:HGNC Symbol;Acc:HGNC:914]	393.63	386.47	389.82	390.83	390.29	390.07	330.959	277.506	304.454	527.203	510.42	421.687	43.41	35.49	38.22	68.71	65.16	53.39	395.371	0.672276	0.159924	4.20371	2.62574e-05	0.00184752
ENST00000511685.5	TENM3-204	protein_coding	TENM3	teneurin transmembrane protein 3 [Source:HGNC Symbol;Acc:HGNC:29944]	10717.5	10710.4	10713.7	10714.7	10714.2	10714	891.269	838.413	956.844	672.941	598.354	683.522	4.25	3.91	4.37	3.19	2.78	3.15	773.557	-0.457034	0.108804	-4.20052	2.66302e-05	0.00186318
ENST00000341247.8	LIMA1-201	protein_coding	LIMA1	LIM domain and actin binding 1 [Source:HGNC Symbol;Acc:HGNC:24636]	3527.54	3520.37	3523.72	3524.74	3524.2	3523.97	208.363	208.624	259.912	444.279	339.015	393.75	3.02	2.95	3.61	6.41	4.78	5.52	308.991	0.79788	0.190138	4.19631	2.71297e-05	0.00189261
ENST00000301686.12	METTL26-201	protein_coding	METTL26	methyltransferase like 26 [Source:HGNC Symbol;Acc:HGNC:14141]	615.56	608.39	611.74	612.75	612.21	611.98	416.57	351.348	327.765	524.306	588.801	566.569	34.8	28.65	26.18	43.48	47.87	45.78	462.56	0.615462	0.146707	4.19519	2.72644e-05	0.0018965
ENST00000374859.2	PSMB9-207	protein_coding	PSMB9	proteasome subunit beta 9 [Source:HGNC Symbol;Acc:HGNC:9546]	603.56	596.39	599.74	600.76	600.21	599.99	416.526	364.995	351.183	674.392	615.811	518.26	35.47	30.38	28.66	57.09	51.06	42.65	490.195	0.672858	0.160419	4.19438	2.73616e-05	0.00189776
ENST00000427721.3	AC068580.4-204	protein_coding	AC068580.4		828.54	821.37	824.72	825.74	825.2	824.97	99.8375	86.0021	84.4375	238.092	164.763	170.289	6.19	5.22	4.99	14.67	9.96	10.18	140.57	1.0842	0.258621	4.19223	2.76223e-05	0.00191032
ENST00000474542.2	REEP5-203	protein_coding	REEP5	receptor accessory protein 5 [Source:HGNC Symbol;Acc:HGNC:30077]	471.59	464.42	467.78	468.79	468.25	468.02	93.3011	37.4723	65.2298	160.776	286.279	221.072	10.14	4.01	6.86	17.46	30.51	23.37	144.022	1.76211	0.421511	4.18047	2.90911e-05	0.00200612
ENST00000293761.7	ALOX15-201	protein_coding	ALOX15	arachidonate 15-lipoxygenase [Source:HGNC Symbol;Acc:HGNC:433]	2498.54	2491.37	2494.72	2495.74	2495.2	2494.97	480.024	409.533	445.463	626.665	598.333	687.64	9.82	8.19	8.74	12.77	11.95	13.63	541.277	0.519525	0.124455	4.1744	2.98774e-05	0.00205443
ENST00000250244.10	AP1M2-201	protein_coding	AP1M2	adaptor related protein complex 1 mu 2 subunit [Source:HGNC Symbol;Acc:HGNC:558]	1570.54	1563.37	1566.72	1567.74	1567.2	1566.97	3190.4	3153.82	3187.89	3533.03	3932.96	3865.63	104.06	100.47	99.57	114.56	125.02	121.93	3477.29	0.249126	0.0599387	4.15634	3.23386e-05	0.002211
ENST00000401547.6	KMT5B-203	protein_coding	KMT5B	lysine methyltransferase 5B [Source:HGNC Symbol;Acc:HGNC:24283]	2487.54	2480.37	2483.72	2484.74	2484.2	2483.97	631.984	717.534	673.628	463.56	524.048	459.245	13	14.41	13.28	9.48	10.51	9.14	578.333	-0.48603	0.116933	-4.15648	3.23183e-05	0.002211
ENST00000559720.5	B2M-206	protein_coding	B2M	beta-2-microglobulin [Source:HGNC Symbol;Acc:HGNC:914]	1041.54	1034.37	1037.72	1038.74	1038.2	1037.97	675.372	660.246	575.126	975.051	946.738	822.766	33.27	31.76	27.13	47.73	45.4	39.18	775.883	0.521692	0.125617	4.15304	3.28087e-05	0.00223677
ENST00000563856.1	CBFA2T3-205	protein_coding	CBFA2T3	CBFA2/RUNX1 translocation partner 3 [Source:HGNC Symbol;Acc:HGNC:1537]	2201.54	2194.37	2197.72	2198.74	2198.2	2197.97	192.153	238.096	234.019	136.273	118.856	117.882	4.47	5.41	5.21	3.16	2.68	2.65	172.88	-0.831754	0.200375	-4.15098	3.31055e-05	0.00225061
ENST00000354900.7	LSR-202	protein_coding	LSR	lipolysis stimulated lipoprotein receptor [Source:HGNC Symbol;Acc:HGNC:29572]	1926.54	1919.37	1922.72	1923.74	1923.2	1922.97	1029.35	927.784	1004.63	1241.43	1212.86	1252.5	27.35	24.08	25.57	32.79	31.43	32.18	1111.43	0.322844	0.0778605	4.14644	3.37681e-05	0.00228917
ENST00000378495.7	UNC13B-201	protein_coding	UNC13B	unc-13 homolog B [Source:HGNC Symbol;Acc:HGNC:12566]	6124.54	6117.37	6120.72	6121.74	6121.2	6120.97	1033.3	1020.11	1185.85	1499.29	1346.62	1485.75	8.62	8.32	9.48	12.44	10.96	12	1261.82	0.419322	0.101232	4.14218	3.44027e-05	0.00232562
ENST00000554546.5	NUMB-212	protein_coding	NUMB	NUMB, endocytic adaptor protein [Source:HGNC Symbol;Acc:HGNC:8060]	3428.54	3421.37	3424.72	3425.74	3425.2	3424.97	813.754	700.322	742.13	424.961	530.808	537.007	12.15	10.2	10.61	6.3	7.73	7.75	624.83	-0.596379	0.144372	-4.13084	3.61447e-05	0.00243652
ENST00000265062.7	RAB7A-201	protein_coding	RAB7A	RAB7A, member RAS oncogene family [Source:HGNC Symbol;Acc:HGNC:9788]	2065.54	2058.37	2061.72	2062.74	2062.2	2061.97	8637.04	8509.22	8550.15	9411.27	9223.43	9207.91	214.08	205.98	202.97	231.88	222.81	220.7	8923.17	0.115546	0.0280503	4.11925	3.8011e-05	0.00255515
ENST00000620041.4	FTH1-212	protein_coding	FTH1	ferritin heavy chain 1 [Source:HGNC Symbol;Acc:HGNC:3976]	646.55	639.38	642.73	643.75	643.21	642.98	42448.6	48805.3	50586	55128.5	60774.8	61642	3373.6	3788.07	3850.47	4355.39	4707.62	4737.5	53230.9	0.323939	0.0786549	4.11849	3.81359e-05	0.00255639
ENST00000326587.11	MAGED1-201	protein_coding	MAGED1	MAGE family member D1 [Source:HGNC Symbol;Acc:HGNC:6813]	2568.54	2561.37	2564.72	2565.74	2565.2	2564.97	3207.44	3035.84	3369.79	4176.37	4482.78	3734.53	63.92	59.07	64.3	82.71	87.06	71.96	3667.79	0.365144	0.0887451	4.11453	3.87976e-05	0.00257913
ENST00000347136.10	GPR107-201	protein_coding	GPR107	G protein-coupled receptor 107 [Source:HGNC Symbol;Acc:HGNC:17830]	7030.54	7023.37	7026.72	7027.74	7027.2	7026.97	1215.89	1309.7	1346.29	1680.69	1535.72	1637.19	8.84	9.3	9.38	12.16	10.88	11.52	1454.25	0.32718	0.0795153	4.11468	3.87724e-05	0.00257913
ENST00000380861.8	WWC3-201	protein_coding	WWC3	WWC family member 3 [Source:HGNC Symbol;Acc:HGNC:29237]	6468.54	6461.37	6464.72	6465.74	6465.2	6464.97	1233.73	1197.04	1222.61	1449.93	1477.64	1617.54	9.75	9.24	9.26	11.39	11.39	12.37	1366.42	0.31654	0.0769198	4.1152	3.8685e-05	0.00257913
ENST00000341690.10	TAF1C-201	protein_coding	TAF1C	TATA-box binding protein associated factor, RNA polymerase I subunit C [Source:HGNC Symbol;Acc:HGNC:11534]	3499.54	3492.37	3495.72	3496.74	3496.2	3495.97	91.2139	54.13	84.4088	309.063	287.69	139.982	1.33	0.77	1.18	4.49	4.09	1.98	161.081	1.67465	0.407245	4.11215	3.91984e-05	0.00259142
ENST00000641023.1	PHGDH-208	protein_coding	PHGDH	phosphoglycerate dehydrogenase [Source:HGNC Symbol;Acc:HGNC:8923]	1917.54	1910.37	1913.72	1914.74	1914.2	1913.97	446.763	569.994	541.601	358.373	302.539	275.878	11.92	14.86	13.85	9.51	7.86	7.13	415.858	-0.734835	0.178674	-4.11272	3.91028e-05	0.00259142
ENST00000395914.5	AURKA-207	protein_coding	AURKA	aurora kinase A [Source:HGNC Symbol;Acc:HGNC:11393]	2059.54	2052.37	2055.72	2056.74	2056.2	2055.97	396.775	326.151	342.675	199.577	201.243	243.132	9.87	7.93	8.15	4.93	4.89	5.85	284.926	-0.722776	0.175872	-4.10966	3.96244e-05	0.00260735
ENST00000498642.5	MINOS1-209	protein_coding	MINOS1	mitochondrial inner membrane organizing system 1 [Source:HGNC Symbol;Acc:HGNC:32068]	490.59	483.42	486.77	487.78	487.24	487.02	227.54	227.032	235.826	131.845	120.186	153.928	23.85	23.23	23.66	13.79	12.26	15.63	182.726	-0.757674	0.184373	-4.10947	3.96568e-05	0.00260735
ENST00000640465.1	ZC3H11A-215	protein_coding	ZC3H11A	zinc finger CCCH-type containing 11A [Source:HGNC Symbol;Acc:HGNC:29093]	4186.54	4179.37	4182.72	4183.74	4183.2	4182.97	3422.86	3195.37	3407.21	4130.63	3912.87	3812.23	41.82	38.14	39.87	50.17	46.6	45.04	3646.86	0.240945	0.0586436	4.10863	3.98011e-05	0.00260969
ENST00000286234.5	DEPTOR-201	protein_coding	DEPTOR	DEP domain containing MTOR interacting protein [Source:HGNC Symbol;Acc:HGNC:22953]	2390.54	2383.37	2386.72	2387.74	2387.2	2386.97	516.642	549.466	541.58	403.465	399.789	398.668	11.06	11.48	11.1	8.59	8.33	8.25	468.268	-0.419118	0.102049	-4.10705	4.00752e-05	0.00261707
ENST00000315491.11	TUBB3-201	protein_coding	TUBB3	tubulin beta 3 class III [Source:HGNC Symbol;Acc:HGNC:20772]	1590.54	1583.37	1586.72	1587.74	1587.2	1586.97	1656.88	1563.88	1552.15	1262.8	1319.54	1341.75	53.36	49.18	47.87	40.41	41.42	41.79	1449.5	-0.282251	0.0687291	-4.10672	4.01317e-05	0.00261707
ENST00000448587.5	TINCR-201	protein_coding	TINCR	tissue differentiation-inducing non-protein coding RNA [Source:HGNC Symbol;Acc:HGNC:14607]	3554.54	3547.37	3550.72	3551.74	3551.2	3550.97	928.25	1003.64	1039.65	707.199	718.55	797.323	13.37	14.11	14.33	10.12	10.08	11.1	865.769	-0.416268	0.101562	-4.09867	4.15524e-05	0.00270237
ENST00000367137.3	SLC41A1-201	protein_coding	SLC41A1	solute carrier family 41 member 1 [Source:HGNC Symbol;Acc:HGNC:19429]	4818.54	4811.37	4814.72	4815.74	4815.2	4814.97	1347.11	1222.08	1197.57	1735.35	1528.96	1882.78	14.3	12.67	12.18	18.31	15.82	19.32	1485.64	0.45205	0.110356	4.09629	4.19833e-05	0.00272301
ENST00000580974.5	PITPNC1-203	protein_coding	PITPNC1	phosphatidylinositol transfer protein, cytoplasmic 1 [Source:HGNC Symbol;Acc:HGNC:21045]	6003.54	5996.37	5999.72	6000.74	6000.2	5999.97	590.451	561.349	588.328	447.533	432.216	438.767	5.03	4.67	4.8	3.79	3.59	3.62	509.774	-0.400752	0.0978524	-4.09547	4.21314e-05	0.00272525
ENST00000408968.3	IFITM1-202	protein_coding	IFITM1	interferon induced transmembrane protein 1 [Source:HGNC Symbol;Acc:HGNC:5412]	676.55	669.38	672.73	673.75	673.2	672.98	6774.53	5829.19	5524.09	8258.8	7978.69	7366.02	514.44	432.28	401.72	623.41	590.46	540.9	6955.22	0.380551	0.0929543	4.09395	4.2408e-05	0.00273577
ENST00000412094.6	FBXL5-202	protein_coding	FBXL5	F-box and leucine rich repeat protein 5 [Source:HGNC Symbol;Acc:HGNC:13602]	2658.54	2651.37	2654.72	2655.74	2655.2	2654.97	268.192	379.038	346.84	118.038	193.142	158.812	5.16	7.13	6.4	2.25	3.63	2.96	244.01	-1.08325	0.264873	-4.08968	4.31961e-05	0.00277914
ENST00000277480.6	LCN2-201	protein_coding	LCN2	lipocalin 2 [Source:HGNC Symbol;Acc:HGNC:6526]	643.56	636.38	639.73	640.75	640.21	639.98	676.644	898.541	992.478	1254.53	1435.54	1685.77	54.06	70.03	75.88	99.56	111.71	130.18	1157.25	0.769749	0.188256	4.08884	4.33535e-05	0.00278181
ENST00000357443.2	MOV10-201	protein_coding	MOV10	Mov10 RISC complex RNA helicase [Source:HGNC Symbol;Acc:HGNC:7200]	3204.54	3197.37	3200.72	3201.74	3201.2	3200.97	1513.83	1106.39	1362.25	2173.07	1888.21	1885.26	24.17	17.25	20.83	34.49	29.37	29.11	1654.84	0.577386	0.141333	4.08529	4.40221e-05	0.00281718
ENST00000271636.11	CGN-201	protein_coding	CGN	cingulin [Source:HGNC Symbol;Acc:HGNC:17429]	4912.54	4905.37	4908.72	4909.74	4909.2	4908.97	3439.38	3529.77	3392.96	3909.65	4241.1	3934.19	35.81	35.89	33.83	40.46	43.04	39.61	3741.18	0.221142	0.0542348	4.07749	4.55245e-05	0.00290558
ENST00000519948.3	ATXN7L3B-201	protein_coding	ATXN7L3B	ataxin 7 like 3B [Source:HGNC Symbol;Acc:HGNC:37931]	7425.54	7418.37	7421.72	7422.74	7422.2	7421.97	6695.19	7160.3	7221.98	8080.44	8189.17	7833.93	46.1	48.16	47.63	55.31	54.97	52.17	7530.17	0.193226	0.0474059	4.07598	4.58208e-05	0.00291673
ENST00000322753.6	MINOS1-201	protein_coding	MINOS1	mitochondrial inner membrane organizing system 1 [Source:HGNC Symbol;Acc:HGNC:32068]	3533.54	3526.37	3529.72	3530.74	3530.2	3529.97	301.366	348.458	298.356	142.727	205.3	184.187	4.37	4.92	4.14	2.06	2.9	2.58	246.732	-0.83441	0.204793	-4.0744	4.61324e-05	0.0029288
ENST00000261381.6	XYLT1-201	protein_coding	XYLT1	xylosyltransferase 1 [Source:HGNC Symbol;Acc:HGNC:15516]	9712.54	9705.37	9708.72	9709.74	9709.2	9708.97	196.86	190.453	223.961	113.766	109.405	128.519	1.04	0.98	1.13	0.6	0.56	0.65	160.494	-0.793479	0.194932	-4.07055	4.69031e-05	0.00296987
ENST00000519449.5	RNF19A-205	protein_coding	RNF19A	ring finger protein 19A, RBR E3 ubiquitin protein ligase [Source:HGNC Symbol;Acc:HGNC:13432]	4151.54	4144.37	4147.72	4148.74	4148.2	4147.97	865.772	1124.14	1144.93	736.194	669.929	654.064	10.66	13.53	13.51	9.01	8.04	7.79	865.838	-0.605516	0.148819	-4.06881	4.7254e-05	0.00298421
ENST00000545756.5	SIAE-205	protein_coding	SIAE	sialic acid acetylesterase [Source:HGNC Symbol;Acc:HGNC:18187]	2742.54	2735.37	2738.72	2739.74	2739.2	2738.97	420.185	557.252	479.723	258.613	329.557	286.515	7.84	10.15	8.58	4.81	6	5.17	388.641	-0.737463	0.181368	-4.06612	4.78028e-05	0.00301095
ENST00000218104.5	ABCD1-201	protein_coding	ABCD1	ATP binding cassette subfamily D member 1 [Source:HGNC Symbol;Acc:HGNC:61]	3485.54	3478.37	3481.72	3482.74	3482.2	3481.97	1147.32	940.513	892.561	1362.88	1464.11	1398.18	16.84	13.49	12.55	19.89	20.94	19.85	1200.93	0.502839	0.123692	4.06524	4.79834e-05	0.00301441
ENST00000426907.5	HUWE1-204	protein_coding	HUWE1	HECT, UBA and WWE domain containing 1, E3 ubiquitin protein ligase [Source:HGNC Symbol;Acc:HGNC:30892]	4626.54	4619.37	4622.72	4623.74	4623.2	4622.97	2993.79	2848.98	2951.72	3282.88	3486.07	3599.39	33.09	30.76	31.25	36.08	37.57	38.48	3193.8	0.237541	0.0585688	4.05575	4.99732e-05	0.00313122
ENST00000301335.9	SLC43A2-201	protein_coding	SLC43A2	solute carrier family 43 member 2 [Source:HGNC Symbol;Acc:HGNC:23087]	7957.54	7950.37	7953.72	7954.74	7954.2	7953.97	236.214	202.866	283.296	361.685	488.947	542.726	1.52	1.28	1.75	2.31	3.07	3.37	352.622	0.946205	0.233487	4.05249	5.06745e-05	0.00316689
ENST00000355072.9	HTT-201	protein_coding	HTT	huntingtin [Source:HGNC Symbol;Acc:HGNC:4851]	13295.5	13288.4	13291.7	13292.7	13292.2	13292	4518.37	4329.26	4605.35	3903.54	3798.14	4017.63	17.37	16.26	16.96	14.92	14.23	14.94	4195.38	-0.198601	0.0491155	-4.04356	5.26453e-05	0.00327748
ENST00000396153.6	FAF1-202	protein_coding	FAF1	Fas associated factor 1 [Source:HGNC Symbol;Acc:HGNC:3578]	6638.54	6631.37	6634.72	6635.74	6635.2	6634.97	359.658	400.135	408.652	264.015	239.07	277.503	2.77	3.01	3.01	2.03	1.79	2.07	324.839	-0.577033	0.142715	-4.04324	5.27172e-05	0.00327748
ENST00000448718.5	GAS5-218	processed_transcript	GAS5	growth arrest specific 5 (non-protein coding) [Source:HGNC Symbol;Acc:HGNC:16355]	386.64	379.48	382.82	383.83	383.29	383.07	1155.93	1237.6	1341.64	912.941	1004.64	925.267	154.17	161.28	171.41	121.1	130.6	119.32	1096.34	-0.395753	0.0979268	-4.04131	5.31536e-05	0.00329607
ENST00000367879.8	UCK2-201	protein_coding	UCK2	uridine-cytidine kinase 2 [Source:HGNC Symbol;Acc:HGNC:12562]	1196.54	1189.37	1192.72	1193.74	1193.2	1192.97	1149.61	1005.73	1062.43	857.128	810.344	824.391	49.23	42.06	43.59	36.49	33.85	34.17	951.605	-0.369497	0.091475	-4.03932	5.36069e-05	0.00331562
ENST00000513140.5	APBB2-224	protein_coding	APBB2	amyloid beta precursor protein binding family B member 2 [Source:HGNC Symbol;Acc:HGNC:582]	3987.54	3980.37	3983.72	3984.74	3984.2	3983.97	49.1899	41.7198	46.8003	136.292	82.3904	125.246	0.63	0.52	0.58	1.74	1.03	1.55	80.2731	1.32353	0.328216	4.03249	5.51897e-05	0.00340473
ENST00000631006.2	SRGAP1-207	protein_coding	SRGAP1	SLIT-ROBO Rho GTPase activating protein 1 [Source:HGNC Symbol;Acc:HGNC:17382]	8227.54	8220.37	8223.72	8224.74	8224.2	8223.97	2306.69	2341.94	2364.97	2645.57	2644.64	2663.7	14.34	14.21	14.08	16.34	16.02	16.01	2494.59	0.181696	0.0450907	4.02958	5.58776e-05	0.00343833
ENST00000369236.5	GFRA1-203	protein_coding	GFRA1	GDNF family receptor alpha 1 [Source:HGNC Symbol;Acc:HGNC:4243]	8930.54	8923.37	8926.72	8927.74	8927.2	8926.97	22988.1	25021.2	24623.2	21878.4	19424.2	19855.7	131.62	139.9	135.02	124.51	108.38	109.93	22298.5	-0.247962	0.0615897	-4.02603	5.67256e-05	0.00348159
ENST00000515780.6	TMEM150C-204	protein_coding	TMEM150C	transmembrane protein 150C [Source:HGNC Symbol;Acc:HGNC:37263]	3117.54	3110.37	3113.72	3114.74	3114.2	3113.97	1250.91	1224.85	1256.12	1551.72	1435.74	1501.33	20.52	19.63	19.75	25.31	22.96	23.83	1370.11	0.267104	0.0664047	4.02237	5.76158e-05	0.0035272
ENST00000596580.2	FARP1-219	protein_coding	FARP1	FERM, ARH/RhoGEF and pleckstrin domain protein 1 [Source:HGNC Symbol;Acc:HGNC:3591]	13353.5	13346.4	13349.7	13350.7	13350.2	13350	339.169	341.427	365.186	254.368	203.954	222.656	1.3	1.28	1.34	0.97	0.76	0.82	287.793	-0.61707	0.153539	-4.01899	5.84475e-05	0.00356902
ENST00000370371.8	DIDO1-205	protein_coding	DIDO1	death inducer-obliterator 1 [Source:HGNC Symbol;Acc:HGNC:2680]	2654.54	2647.37	2650.72	2651.74	2651.2	2650.97	1323.08	1324.38	1433.33	923.916	1031.89	1110.04	25.51	24.94	26.47	17.71	19.4	20.7	1191.11	-0.411786	0.102541	-4.01583	5.92364e-05	0.00360801
ENST00000377768.7	SNX5-202	protein_coding	SNX5	sorting nexin 5 [Source:HGNC Symbol;Acc:HGNC:14969]	2109.54	2102.37	2105.72	2106.74	2106.2	2105.97	1766.79	1767.23	1939.03	2184.64	2375.76	2193.1	42.87	41.88	45.06	52.69	56.2	51.46	2037.76	0.301435	0.0750882	4.01441	5.95953e-05	0.00362068
ENST00000475269.5	RBCK1-213	protein_coding	RBCK1	RANBP2-type and C3HC4-type zinc finger containing 1 [Source:HGNC Symbol;Acc:HGNC:15864]	1021.54	1014.37	1017.72	1018.74	1018.2	1017.97	415.724	473.737	481.504	630.718	632.058	609.912	20.88	23.22	23.14	31.49	30.92	29.62	540.609	0.449711	0.112058	4.01319	5.9904e-05	0.00363025
ENST00000429976.5	TRANK1-201	protein_coding	TRANK1	tetratricopeptide repeat and ankyrin repeat containing 1 [Source:HGNC Symbol;Acc:HGNC:29011]	10302.5	10295.4	10298.7	10299.7	10299.2	10299	1227.72	1512.32	1158.24	1861.05	2286.71	1791.07	6.09	7.33	5.51	9.18	11.06	8.6	1639.52	0.607336	0.151456	4.00999	6.07222e-05	0.00367056
ENST00000216951.6	GSS-201	protein_coding	GSS	glutathione synthetase [Source:HGNC Symbol;Acc:HGNC:4624]	1743.54	1736.37	1739.72	1740.74	1740.2	1739.97	1081.86	1052.15	1136.71	1335.8	1304.69	1331.1	31.78	30.18	31.98	38.99	37.35	37.81	1207.06	0.279343	0.0697974	4.0022	6.27563e-05	0.00378399
ENST00000399817.8	IFITM2-202	protein_coding	IFITM2	interferon induced transmembrane protein 2 [Source:HGNC Symbol;Acc:HGNC:5413]	480.59	473.42	476.77	477.79	477.24	477.02	1174.86	1026.35	1067.09	1362.34	1388.21	1366.54	125.86	107.34	109.44	145.06	144.87	141.54	1230.9	0.331646	0.0829463	3.99832	6.37929e-05	0.00383685
ENST00000379757.8	TXNDC5-201	protein_coding	TXNDC5	thioredoxin domain containing 5 [Source:HGNC Symbol;Acc:HGNC:21073]	2785.54	2778.37	2781.72	2782.74	2782.2	2781.97	6209.02	6389.08	6709.43	5554.29	5484.97	5780.24	114.06	114.62	118.05	101.43	98.21	102.68	6021.17	-0.198543	0.0496673	-3.99746	6.40265e-05	0.00384127
ENST00000288985.11	ERCC6L2-201	protein_coding	ERCC6L2	ERCC excision repair 6 like 2 [Source:HGNC Symbol;Acc:HGNC:26922]	4385.54	4378.37	4381.72	4382.74	4382.2	4381.97	188.725	236.768	205.585	130.928	87.7933	99.8694	2.2	2.7	2.3	1.52	1.01	1.12	158.278	-0.981554	0.246155	-3.98755	6.6759e-05	0.00398528
ENST00000615541.2	TMEM265-201	protein_coding	TMEM265	transmembrane protein 265 [Source:HGNC Symbol;Acc:HGNC:51241]	816.54	809.37	812.72	813.74	813.2	812.97	180.944	254.628	222.381	339.975	411.906	373.326	11.36	15.6	13.4	21.23	25.26	22.68	297.194	0.775705	0.194529	3.98759	6.67466e-05	0.00398528
ENST00000255320.6	HMGB1P5-201	transcribed_processed_pseudogene	HMGB1P5	high mobility group box 1 pseudogene 5 [Source:HGNC Symbol;Acc:HGNC:4997]	463.6	456.43	459.78	460.79	460.25	460.03	1681.85	1740.98	1853.24	1490.91	1426	1387.01	186.77	188.89	197.19	164.63	154.44	149.02	1596.67	-0.294784	0.0740735	-3.97961	6.90282e-05	0.00410034
ENST00000436367.5	ATXN1-202	protein_coding	ATXN1	ataxin 1 [Source:HGNC Symbol;Acc:HGNC:10548]	10408.5	10401.4	10404.7	10405.7	10405.2	10405	904.683	906.037	901.69	754.509	717.214	712.991	4.44	4.35	4.24	3.68	3.43	3.39	816.187	-0.312317	0.0784749	-3.97984	6.89622e-05	0.00410034
ENST00000356728.10	RORC-202	protein_coding	RORC	RAR related orphan receptor C [Source:HGNC Symbol;Acc:HGNC:10260]	2871.54	2864.37	2867.72	2868.74	2868.2	2867.97	139.474	143.252	176.343	240.373	270.13	257.045	2.49	2.49	3	4.26	4.69	4.43	204.436	0.737587	0.185555	3.97502	7.0372e-05	0.00415958
ENST00000638394.1	PRICKLE2-205	protein_coding	PRICKLE2	prickle planar cell polarity protein 2 [Source:HGNC Symbol;Acc:HGNC:20340]	9777.54	9770.37	9773.72	9774.74	9774.2	9773.97	758.808	953.389	1030.39	587.076	521.364	636.044	3.97	4.87	5.16	3.05	2.66	3.22	747.845	-0.650473	0.163635	-3.97515	7.03355e-05	0.00415958
ENST00000355044.7	ATRNL1-201	protein_coding	ATRNL1	attractin like 1 [Source:HGNC Symbol;Acc:HGNC:29063]	8300.54	8293.37	8296.72	8297.74	8297.2	8296.97	263.956	311.056	299.173	194.259	191.797	171.086	1.63	1.87	1.77	1.19	1.15	1.02	238.554	-0.652406	0.164214	-3.97291	7.09999e-05	0.00418638
ENST00000260118.6	GGH-201	protein_coding	GGH	gamma-glutamyl hydrolase [Source:HGNC Symbol;Acc:HGNC:4248]	1428.54	1421.37	1424.72	1425.74	1425.2	1424.97	984.95	1041.36	1114.2	787.469	818.46	839.114	35.32	36.46	38.26	28.09	28.6	29.11	930.925	-0.360885	0.0908722	-3.97135	7.14675e-05	0.00419792
ENST00000462775.5	RASAL2-203	protein_coding	RASAL2	RAS protein activator like 2 [Source:HGNC Symbol;Acc:HGNC:9874]	14274.5	14267.4	14270.7	14271.7	14271.2	14271	395.555	381.986	416.161	267.249	270.138	297.147	1.42	1.34	1.43	0.95	0.94	1.03	338.039	-0.514154	0.129474	-3.97109	7.15456e-05	0.00419792
ENST00000433197.3	ERN1-201	protein_coding	ERN1	endoplasmic reticulum to nucleus signaling 1 [Source:HGNC Symbol;Acc:HGNC:3449]	7697.54	7690.37	7693.72	7694.74	7694.2	7693.97	1626.63	1717.63	1666.35	1913.6	2062.49	1977.72	10.81	11.14	10.6	12.64	13.35	12.7	1827.4	0.248519	0.0626001	3.96995	7.1889e-05	0.00420779
ENST00000355710.7	RET-202	protein_coding	RET	ret proto-oncogene [Source:HGNC Symbol;Acc:HGNC:9967]	5480.54	5473.37	5476.72	5477.74	5477.2	5476.97	992.976	980.728	1238.51	676.122	687.492	794.858	9.27	8.94	11.07	6.27	6.25	7.18	895.114	-0.572717	0.144334	-3.96799	7.24803e-05	0.00423207
ENST00000371752.5	ZNFX1-202	protein_coding	ZNFX1	zinc finger NFX1-type containing 1 [Source:HGNC Symbol;Acc:HGNC:29271]	7033.54	7026.37	7029.72	7030.74	7030.2	7029.97	3572.53	4269.47	4444.18	5536.83	6052.39	5049.09	25.98	30.31	30.95	40.01	42.89	35.5	4820.75	0.43706	0.110362	3.96025	7.48708e-05	0.00436104
ENST00000356950.1	HIST1H2BK-201	protein_coding	HIST1H2BK	histone cluster 1 H2B family member k [Source:HGNC Symbol;Acc:HGNC:13954]	203.14	196.26	199.43	200.41	199.87	199.7	1738.75	1323.38	1542.88	2091.9	2056.31	2308.63	444.79	330.75	377.96	532.08	512.58	571.05	1843.64	0.487209	0.123118	3.95724	7.58199e-05	0.00439624
ENST00000522411.5	LSS-211	protein_coding	LSS	lanosterol synthase [Source:HGNC Symbol;Acc:HGNC:6708]	2344.54	2337.37	2340.72	2341.74	2341.2	2340.97	114.409	81.2377	63.5188	197.439	176.933	207.93	2.51	1.72	1.33	4.29	3.77	4.4	140.245	1.16982	0.295621	3.95717	7.58415e-05	0.00439624
ENST00000222690.10	H2AFV-201	protein_coding	H2AFV	H2A histone family member V [Source:HGNC Symbol;Acc:HGNC:20664]	3625.54	3618.37	3621.72	3622.74	3622.2	3621.97	1401.34	1592.26	1550.27	1198.7	1230.45	1209.9	19.78	21.95	20.95	16.82	16.92	16.51	1363.82	-0.320014	0.0809274	-3.95434	7.67469e-05	0.00441672
ENST00000238788.13	TMEM214-201	protein_coding	TMEM214	transmembrane protein 214 [Source:HGNC Symbol;Acc:HGNC:25983]	2811.54	2804.37	2807.72	2808.74	2808.2	2807.97	1979.4	1919.86	1816.93	2239.53	2270.44	2228.27	36.03	34.14	31.67	40.53	40.27	39.23	2075.74	0.237346	0.0600121	3.95496	7.65462e-05	0.00441672
ENST00000341744.7	PMEPA1-202	protein_coding	PMEPA1	prostate transmembrane protein, androgen induced 1 [Source:HGNC Symbol;Acc:HGNC:14107]	4666.54	4659.37	4662.72	4663.74	4663.2	4662.97	847.962	957.169	1003.69	646.059	634.814	733.466	9.29	10.25	10.54	7.04	6.78	7.77	803.859	-0.477032	0.120632	-3.95443	7.67166e-05	0.00441672
ENST00000367055.8	SOD2-203	protein_coding	SOD2	superoxide dismutase 2 [Source:HGNC Symbol;Acc:HGNC:11180]	811.54	804.37	807.72	808.74	808.2	807.97	762.086	755.985	727.339	899.803	1092.56	1034.83	48.2	46.72	44.06	56.55	67.39	63.29	878.769	0.430419	0.108867	3.95363	7.69742e-05	0.0044192
ENST00000481284.5	ACSS2-214	protein_coding	ACSS2	acyl-CoA synthetase short chain family member 2 [Source:HGNC Symbol;Acc:HGNC:15814]	2672.54	2665.37	2668.72	2669.74	2669.2	2668.97	111.748	173.724	117.842	271.488	257.973	248.859	2.15	3.24	2.17	5.16	4.83	4.61	196.939	0.954208	0.241396	3.95288	7.72174e-05	0.00442259
ENST00000356286.9	RBCK1-202	protein_coding	RBCK1	RANBP2-type and C3HC4-type zinc finger containing 1 [Source:HGNC Symbol;Acc:HGNC:15864]	2595.54	2588.37	2591.72	2592.74	2592.2	2591.97	834.946	835.942	800.659	990.441	1046.75	1132.15	16.46	16.1	15.12	19.41	20.12	21.58	940.147	0.36089	0.0913645	3.95	7.81516e-05	0.00444427
ENST00000618621.4	LPP-221	protein_coding	LPP	LIM domain containing preferred translocation partner in lipoma [Source:HGNC Symbol;Acc:HGNC:6679]	18098.5	18091.4	18094.7	18095.7	18095.2	18095	626.476	452.949	769.642	178.168	353.881	234.115	1.77	1.25	2.08	0.5	0.97	0.64	435.872	-1.27502	0.32277	-3.95023	7.8075e-05	0.00444427
ENST00000640853.1	LPP-222	protein_coding	LPP	LIM domain containing preferred translocation partner in lipoma [Source:HGNC Symbol;Acc:HGNC:6679]	18098.5	18091.4	18094.7	18095.7	18095.2	18095	626.476	452.949	769.642	178.168	353.881	234.115	1.77	1.25	2.08	0.5	0.97	0.64	435.872	-1.27502	0.32277	-3.95023	7.8075e-05	0.00444427
ENST00000339624.9	SERF2-202	protein_coding	SERF2	small EDRK-rich factor 2 [Source:HGNC Symbol;Acc:HGNC:10757]	327.69	320.55	323.88	324.89	324.35	324.14	462.347	422.75	402.395	555.953	615.717	655.072	72.82	65.11	60.78	87.17	94.49	99.85	519.039	0.505804	0.128245	3.94405	8.01178e-05	0.00454531
ENST00000339083.11	RHOC-202	protein_coding	RHOC	ras homolog family member C [Source:HGNC Symbol;Acc:HGNC:669]	1239.54	1232.37	1235.72	1236.74	1236.2	1235.97	1055.11	1049.68	978.829	1251.92	1247.93	1369.61	43.63	42.4	38.75	51.44	50.28	54.76	1158.85	0.330079	0.0837798	3.93983	8.15379e-05	0.00461497
ENST00000444842.6	KCNK2-203	protein_coding	KCNK2	potassium two pore domain channel subfamily K member 2 [Source:HGNC Symbol;Acc:HGNC:6277]	3200.54	3193.37	3196.72	3197.74	3197.2	3196.97	463.181	613.534	613.432	785.523	921.145	910.295	7.41	9.58	9.39	12.49	14.35	14.08	717.852	0.63132	0.160291	3.93858	8.19667e-05	0.00462832
ENST00000236137.9	SLC19A2-201	protein_coding	SLC19A2	solute carrier family 19 member 2 [Source:HGNC Symbol;Acc:HGNC:10938]	3492.54	3485.37	3488.72	3489.74	3489.2	3488.97	1609.65	1581.05	1332.15	1961.69	2044.89	1921.27	23.58	22.62	18.69	28.57	29.2	27.21	1741.79	0.390513	0.0991842	3.93725	8.24193e-05	0.00464295
ENST00000596802.5	SIN3B-209	protein_coding	SIN3B	SIN3 transcription regulator family member B [Source:HGNC Symbol;Acc:HGNC:19354]	2377.54	2370.37	2373.72	2374.74	2374.2	2373.97	587.251	528.033	556.624	397.026	432.204	410.129	12.64	11.1	11.48	8.51	9.06	8.54	485.211	-0.434885	0.110502	-3.93553	8.30142e-05	0.00466551
ENST00000281419.7	ASAP2-201	protein_coding	ASAP2	ArfGAP with SH3 domain, ankyrin repeat and PH domain 2 [Source:HGNC Symbol;Acc:HGNC:2721]	5533.54	5526.37	5529.72	5530.74	5530.2	5529.97	454.446	436.252	521.476	612.803	830.664	803.863	4.2	3.94	4.61	5.63	7.48	7.18	609.917	0.668833	0.170033	3.93356	8.3698e-05	0.00469295
ENST00000312046.10	OXR1-202	protein_coding	OXR1	oxidation resistance 1 [Source:HGNC Symbol;Acc:HGNC:15822]	4227.54	4220.37	4223.72	4224.74	4224.2	4223.97	1852.31	2023.86	2191.25	1586.15	1618.1	1420.28	22.41	23.91	25.39	19.07	19.09	16.62	1781.99	-0.393384	0.100223	-3.9251	8.66943e-05	0.00484963
ENST00000242592.8	ACADS-201	protein_coding	ACADS	acyl-CoA dehydrogenase, C-2 to C-3 short chain [Source:HGNC Symbol;Acc:HGNC:90]	1771.54	1764.37	1767.72	1768.74	1768.2	1767.97	237.642	203.199	209.79	320.81	333.602	314.356	6.86	5.75	5.8	9.22	9.41	8.79	269.9	0.570992	0.145833	3.91539	9.02592e-05	0.00503731
ENST00000425460.5	MYH14-203	protein_coding	MYH14	myosin heavy chain 14 [Source:HGNC Symbol;Acc:HGNC:23212]	6632.54	6625.37	6628.72	6629.74	6629.2	6628.97	4094.01	3655.32	3821.61	4474.3	5000.21	4608.69	31.57	27.52	28.22	34.29	37.57	34.36	4275.69	0.282472	0.0721947	3.91264	9.1292e-05	0.00508312
ENST00000626055.2	ADH5-213	protein_coding	ADH5	alcohol dehydrogenase 5 (class III), chi polypeptide [Source:HGNC Symbol;Acc:HGNC:253]	1120.54	1113.37	1116.72	1117.74	1117.2	1116.97	669.284	681.553	733.936	910.731	1034.53	872.698	30.63	30.47	32.18	41.42	46.16	38.6	817.122	0.431441	0.110343	3.91002	9.22904e-05	0.00512682
ENST00000380122.9	TXLNG-201	protein_coding	TXLNG	taxilin gamma [Source:HGNC Symbol;Acc:HGNC:18578]	4222.54	4215.37	4218.72	4219.74	4219.2	4218.97	1417.63	1475.9	1496.77	1215.9	1185.88	1254.92	17.17	17.47	17.36	14.65	14	14.7	1341.17	-0.261954	0.0670848	-3.90482	9.42946e-05	0.00522606
ENST00000395353.5	MVP-202	protein_coding	MVP	major vault protein [Source:HGNC Symbol;Acc:HGNC:7531]	2746.54	2739.37	2742.72	2743.74	2743.2	2742.97	84.9311	133.108	67.6961	179.205	333.609	281.604	1.58	2.41	1.21	3.32	6.06	5.08	180.026	1.47942	0.379039	3.90308	9.49772e-05	0.00525176
ENST00000166345.7	TRIP13-201	protein_coding	TRIP13	thyroid hormone receptor interactor 13 [Source:HGNC Symbol;Acc:HGNC:12307]	2493.54	2486.37	2489.72	2490.74	2490.2	2489.97	1149.55	1059.37	1154.19	903.513	877.916	924.221	23.59	21.24	22.69	18.44	17.55	18.34	1011.46	-0.313695	0.0803939	-3.90197	9.5412e-05	0.00526367
ENST00000253861.4	EXOC4-201	protein_coding	EXOC4	exocyst complex component 4 [Source:HGNC Symbol;Acc:HGNC:30389]	4006.54	3999.37	4002.72	4003.74	4003.2	4002.97	2427.31	2628.33	2679.32	2224.67	2000.33	2093.17	30.99	32.77	32.76	28.24	24.89	25.84	2342.19	-0.291123	0.0746992	-3.89727	9.72826e-05	0.00535456
ENST00000341012.11	POMT1-201	protein_coding	POMT1	protein O-mannosyltransferase 1 [Source:HGNC Symbol;Acc:HGNC:9202]	2733.54	2726.37	2729.72	2730.74	2730.2	2729.97	148.405	104.908	151.272	231.785	268.778	241.492	2.78	1.92	2.71	4.32	4.9	4.37	191.107	0.867863	0.222776	3.89567	9.79266e-05	0.00537699
ENST00000638295.1	SCARB2-207	protein_coding	SCARB2	scavenger receptor class B member 2 [Source:HGNC Symbol;Acc:HGNC:1665]	4328.54	4321.37	4324.72	4325.74	4325.2	4324.97	1162.75	1366.5	1446.62	1912.4	1835.55	1675.68	13.74	15.77	16.37	22.47	21.14	19.15	1566.58	0.447402	0.114861	3.89515	9.81383e-05	0.00537699
ENST00000237858.10	GLRX-201	protein_coding	GLRX	glutaredoxin [Source:HGNC Symbol;Acc:HGNC:4330]	1032.54	1025.37	1028.72	1029.74	1029.2	1028.97	53.5286	79.1415	77.7425	166.262	141.808	134.262	2.68	3.82	3.69	8.2	6.84	6.44	108.791	1.07384	0.276323	3.88618	0.000101836	0.00556687
ENST00000522940.5	COX6C-208	protein_coding	COX6C	cytochrome c oxidase subunit 6C [Source:HGNC Symbol;Acc:HGNC:2285]	515.58	508.41	511.76	512.77	512.23	512.01	471.241	460.702	418.117	639.973	742.729	588.688	47.01	44.93	39.97	63.54	72.29	56.84	553.575	0.543609	0.140093	3.88035	0.000104307	0.005689
ENST00000359930.8	SULF2-201	protein_coding	SULF2	sulfatase 2 [Source:HGNC Symbol;Acc:HGNC:20392]	4736.54	4729.37	4732.72	4733.74	4733.2	4732.97	2632.47	2464.48	2085.93	1763.25	1632.96	1234.45	28.43	25.99	21.57	18.93	17.19	12.89	1968.92	-0.634273	0.163747	-3.8735	0.000107284	0.00580803
ENST00000399808.4	IFITM3-201	protein_coding	IFITM3	interferon induced transmembrane protein 3 [Source:HGNC Symbol;Acc:HGNC:5414]	629.56	622.38	625.74	626.75	626.21	625.98	14873.7	11962.5	11930.6	17632.7	16283.9	16355.9	1214.16	953.74	932.81	1430.9	1295.58	1291.13	14839.9	0.374876	0.0967536	3.87454	0.000106827	0.00580803
ENST00000445265.6	TCOF1-206	protein_coding	TCOF1	treacle ribosome biogenesis factor 1 [Source:HGNC Symbol;Acc:HGNC:11654]	4646.54	4639.37	4642.72	4643.74	4643.2	4642.97	1152.08	1083.44	1017.06	830.646	888.739	801.41	12.68	11.64	10.72	9.09	9.53	8.54	962.229	-0.369793	0.0954772	-3.87311	0.000107457	0.00580803
ENST00000448775.3	CLMP-201	protein_coding	CLMP	CXADR like membrane protein [Source:HGNC Symbol;Acc:HGNC:24039]	4893.54	4886.37	4889.72	4890.74	4890.2	4889.97	381.059	375.413	467.995	284.396	249.874	251.31	3.98	3.83	4.69	2.96	2.55	2.54	335.008	-0.641899	0.165723	-3.87333	0.000107359	0.00580803
ENST00000357103.4	ADIPOR2-201	protein_coding	ADIPOR2	adiponectin receptor 2 [Source:HGNC Symbol;Acc:HGNC:24041]	3839.54	3832.37	3835.72	3836.74	3836.2	3835.97	3474.48	4106.73	4414.29	5050.27	5252.72	5292.28	46.29	53.44	56.33	66.89	68.2	68.19	4598.46	0.378642	0.0977984	3.87166	0.000108097	0.00581638
ENST00000435298.6	OSR2-202	protein_coding	OSR2	odd-skipped related transciption factor 2 [Source:HGNC Symbol;Acc:HGNC:15830]	1557.54	1550.37	1553.72	1554.74	1554.2	1553.97	836.884	728.341	737.211	955.942	1026.46	1042.13	27.54	23.39	23.22	31.25	32.91	33.14	887.828	0.393023	0.101503	3.87202	0.000107937	0.00581638
ENST00000378158.5	CASK-202	protein_coding	CASK	calcium/calmodulin dependent serine protein kinase [Source:HGNC Symbol;Acc:HGNC:1497]	3669.54	3662.37	3665.72	3666.74	3666.2	3665.97	389.018	315.743	430.399	215.702	248.521	181.731	5.43	4.3	5.74	2.98	3.38	2.45	296.852	-0.820781	0.212038	-3.87092	0.000108425	0.00582097
ENST00000618200.4	IFI27-211	protein_coding	IFI27	interferon alpha inducible protein 27 [Source:HGNC Symbol;Acc:HGNC:5397]	186.31	179.52	182.64	183.61	183.06	182.91	3158.17	3087.86	2517.7	4047.96	3942.7	3660.8	882.18	842.42	673.44	1123.72	1073.03	988.82	3402.53	0.411035	0.106213	3.86992	0.000108871	0.00583189
ENST00000368594.7	INPP5A-203	protein_coding	INPP5A	inositol polyphosphate-5-phosphatase A [Source:HGNC Symbol;Acc:HGNC:6076]	2788.54	2781.37	2784.72	2785.74	2785.2	2784.97	639.231	631.688	610.1	475.377	506.492	469.885	11.72	11.32	10.73	8.68	9.06	8.34	555.462	-0.376088	0.0972409	-3.86759	0.000109917	0.00584877
ENST00000369158.1	HIST2H3C-201	protein_coding	HIST2H3C	histone cluster 2 H3 family member c [Source:HGNC Symbol;Acc:HGNC:20503]	1477.54	1470.37	1473.72	1474.74	1474.2	1473.97	434.913	398.663	399.537	525.703	571.303	559.135	15.09	13.48	13.27	18.12	19.29	18.75	481.542	0.424248	0.109691	3.86767	0.000109881	0.00584877
ENST00000403683.1	HIST2H3A-201	protein_coding	HIST2H3A	histone cluster 2 H3 family member a [Source:HGNC Symbol;Acc:HGNC:20505]	1477.54	1470.37	1473.72	1474.74	1474.2	1473.97	434.913	398.663	399.537	525.703	571.303	559.135	15.09	13.48	13.27	18.12	19.29	18.75	481.542	0.424248	0.109691	3.86767	0.000109881	0.00584877
ENST00000588814.5	DNAJC7-211	protein_coding	DNAJC7	DnaJ heat shock protein family (Hsp40) member C7 [Source:HGNC Symbol;Acc:HGNC:12392]	1540.54	1533.37	1536.72	1537.74	1537.2	1536.97	233.107	107.278	158.81	69.7373	47.2711	56.4864	7.74	3.47	5.05	2.29	1.53	1.8	112.115	-1.52393	0.394145	-3.86642	0.000110443	0.00586376
ENST00000511577.5	DDX60L-209	protein_coding	DDX60L	DEAD-box helicase 60 like [Source:HGNC Symbol;Acc:HGNC:26429]	6602.54	6595.37	6598.72	6599.74	6599.2	6598.97	882.143	983.996	874.131	1502.52	1438.47	1113.29	6.83	7.44	6.49	11.57	10.86	8.34	1132.43	0.564352	0.146518	3.85175	0.000117276	0.0062128
ENST00000255559.7	SLC39A11-201	protein_coding	SLC39A11	solute carrier family 39 member 11 [Source:HGNC Symbol;Acc:HGNC:14463]	2558.54	2551.37	2554.72	2555.74	2555.2	2554.97	579.266	718.632	668.61	472.148	460.569	391.299	11.58	14.04	12.82	9.4	8.99	7.58	548.421	-0.572468	0.149073	-3.84019	0.000122937	0.00649832
ENST00000412615.6	TRAFD1-202	protein_coding	TRAFD1	TRAF-type zinc finger domain containing 1 [Source:HGNC Symbol;Acc:HGNC:24808]	2518.54	2511.37	2514.72	2515.74	2515.2	2514.97	2680.84	3060.74	3047.2	3484.22	3537.33	3688.69	54.48	60.74	59.31	70.38	70.06	72.5	3249.84	0.28596	0.0745013	3.83832	0.000123878	0.00653369
ENST00000417171.5	PDZK1-202	protein_coding	PDZK1	PDZ domain containing 1 [Source:HGNC Symbol;Acc:HGNC:8821]	2051.54	2044.37	2047.72	2048.74	2048.2	2047.97	2579.91	2293.23	2567.56	1921.74	1704.49	2062.94	64.37	55.88	61.37	47.67	41.47	49.78	2188.31	-0.386024	0.100593	-3.8375	0.000124293	0.0065412
ENST00000265316.7	ABCB6-201	protein_coding	ABCB6	ATP binding cassette subfamily B member 6 (Langereis blood group) [Source:HGNC Symbol;Acc:HGNC:47]	2837.54	2830.37	2833.72	2834.74	2834.2	2833.97	510.501	413.972	442.112	610.588	651.012	709.738	9.2	7.3	7.64	10.94	11.44	12.38	556.321	0.528422	0.13774	3.83636	0.000124871	0.00654293
ENST00000350051.7	BIRC5-202	protein_coding	BIRC5	baculoviral IAP repeat containing 5 [Source:HGNC Symbol;Acc:HGNC:593]	2451.54	2444.37	2447.72	2448.74	2448.2	2447.97	1643.84	1555.82	1724.19	1401.41	1249.34	1288.51	34.31	31.72	34.47	29.09	25.43	26.01	1477.18	-0.322187	0.083976	-3.83666	0.000124721	0.00654293
ENST00000368733.3	S100A8-202	protein_coding	S100A8	S100 calcium binding protein A8 [Source:HGNC Symbol;Acc:HGNC:10498]	344.67	337.53	340.86	341.87	341.33	341.11	310.164	405.424	415.755	636.354	527.957	655.897	46.52	59.28	59.67	94.68	77.1	94.95	491.925	0.688747	0.179628	3.83429	0.000125928	0.00656961
ENST00000580261.5	RPL17-208	protein_coding	RPL17	ribosomal protein L17 [Source:HGNC Symbol;Acc:HGNC:10307]	490.59	483.42	486.77	487.78	487.24	487.02	8694.51	9118.73	9035	8045.77	8079.45	8267.1	912.29	934.36	907.91	839.17	826.15	838.77	8540.09	-0.13778	0.0359288	-3.8348	0.000125668	0.00656961
ENST00000552692.5	CD63-214	protein_coding	CD63	CD63 molecule [Source:HGNC Symbol;Acc:HGNC:1692]	770.55	763.37	766.73	767.74	767.2	766.97	441.994	537.699	362.003	752.845	686.058	705.726	29.46	35	23.12	49.89	44.59	45.45	581.054	0.679664	0.177326	3.83284	0.000126672	0.00659409
ENST00000357304.8	PRRC2B-202	protein_coding	PRRC2B	proline rich coiled-coil 2B [Source:HGNC Symbol;Acc:HGNC:28121]	10863.5	10856.4	10859.7	10860.7	10860.2	10860	9846.06	8084.34	8889.03	7311.13	7016.82	7352.56	46.34	37.16	40.07	34.2	32.18	33.46	8083.32	-0.306955	0.0804165	-3.81707	0.000135045	0.00701474
ENST00000222120.7	RAB3D-201	protein_coding	RAB3D	RAB3D, member RAS oncogene family [Source:HGNC Symbol;Acc:HGNC:9779]	4094.54	4087.37	4090.72	4091.74	4091.2	4090.97	1921.13	1922.44	2055.03	2235.41	2402.83	2352.67	24	23.45	24.59	27.76	29.26	28.42	2148.25	0.244055	0.0640079	3.81289	0.000137351	0.0071191
ENST00000366812.5	ACBD3-201	protein_coding	ACBD3	acyl-CoA binding domain containing 3 [Source:HGNC Symbol;Acc:HGNC:15453]	3394.54	3387.37	3390.72	3391.74	3391.2	3390.97	2071.03	2271.28	2248.12	1773.89	1846.35	1880.34	31.21	33.43	32.45	26.58	27.12	27.4	2015.17	-0.259987	0.0682027	-3.81198	0.000137858	0.00712998
ENST00000011619.5	RANBP9-201	protein_coding	RANBP9	RAN binding protein 9 [Source:HGNC Symbol;Acc:HGNC:13727]	2934.54	2927.37	2930.72	2931.74	2931.2	2930.97	2414.03	2700.29	2703.64	3045.45	3319.9	3145.93	42.1	45.98	45.16	52.79	56.42	53.05	2888.21	0.282563	0.0741497	3.81071	0.000138566	0.00715119
ENST00000288986.6	NCK1-201	protein_coding	NCK1	NCK adaptor protein 1 [Source:HGNC Symbol;Acc:HGNC:7664]	1758.54	1751.37	1754.72	1755.74	1755.2	1754.97	608.392	690.887	678.684	495.698	502.429	433.877	17.73	19.63	18.93	14.35	14.24	12.21	568.328	-0.468742	0.123046	-3.80947	0.000139266	0.00717191
ENST00000440079.1	FGD5-AS1-205	antisense_RNA	FGD5-AS1	FGD5 antisense RNA 1 [Source:HGNC Symbol;Acc:HGNC:40410]	1348.54	1341.37	1344.72	1345.74	1345.2	1344.97	123.213	162.667	122.037	340.083	280.922	211.212	4.68	6.04	4.43	12.83	10.43	7.77	206.689	1.02985	0.270622	3.8055	0.000141519	0.00727233
ENST00000322886.11	E2F7-201	protein_coding	E2F7	E2F transcription factor 7 [Source:HGNC Symbol;Acc:HGNC:23820]	5561.54	5554.37	5557.72	5558.74	5558.2	5557.97	717.454	715.812	745.443	595.632	564.581	534.544	6.6	6.43	6.56	5.44	5.06	4.75	645.578	-0.364682	0.0959471	-3.80087	0.000144191	0.0073938
ENST00000310806.8	MIS18BP1-201	protein_coding	MIS18BP1	MIS18 binding protein 1 [Source:HGNC Symbol;Acc:HGNC:20190]	4598.54	4591.37	4594.72	4595.74	4595.2	4594.97	1413.25	1510.74	1454.97	1254.55	1183.18	1123.94	15.72	16.41	15.5	13.87	12.83	12.09	1323.44	-0.29859	0.0786658	-3.79568	0.00014724	0.00753405
ENST00000361099.7	STAT1-201	protein_coding	STAT1	signal transducer and activator of transcription 1 [Source:HGNC Symbol;Acc:HGNC:11362]	4131.54	4124.37	4127.72	4128.74	4128.2	4127.97	19292.9	21683.4	20762.6	25494.2	25234.5	22771.1	238.87	262.18	246.2	313.77	304.5	272.64	22539.8	0.251485	0.0662685	3.79494	0.000147678	0.00754035
ENST00000561623.5	GTF3C1-202	protein_coding	GTF3C1	general transcription factor IIIC subunit 1 [Source:HGNC Symbol;Acc:HGNC:4664]	6836.54	6829.37	6832.72	6833.74	6833.2	6832.97	2804.84	2844.86	2929.92	3163.9	3402.36	3495.4	20.98	20.78	20.99	23.52	24.8	25.28	3106.88	0.230102	0.0606428	3.79438	0.000148014	0.0075415
ENST00000286186.10	CASP10-202	protein_coding	CASP10	caspase 10 [Source:HGNC Symbol;Acc:HGNC:1500]	5749.54	5742.37	5745.72	5746.74	5746.2	5745.97	97.5113	81.1611	50.1418	185.666	251.225	155.533	0.86	0.71	0.42	1.64	2.18	1.34	136.873	1.37126	0.361563	3.79259	0.000149086	0.00758003
ENST00000358461.6	AFAP1-201	protein_coding	AFAP1	actin filament associated protein 1 [Source:HGNC Symbol;Acc:HGNC:24017]	7337.54	7330.37	7333.72	7334.74	7334.2	7333.97	627.196	552.269	604.2	465.787	372.788	399.473	4.37	3.76	4.03	3.23	2.53	2.69	503.619	-0.526436	0.139008	-3.7871	0.000152417	0.00772892
ENST00000620595.1	HS6ST3-202	protein_coding	HS6ST3	heparan sulfate 6-O-sulfotransferase 3 [Source:HGNC Symbol;Acc:HGNC:19134]	6894.54	6887.37	6890.72	6891.74	6891.2	6890.97	137.782	166.813	142.903	86.9321	85.0927	69.5805	1.02	1.21	1.01	0.64	0.62	0.5	114.851	-0.893766	0.236027	-3.7867	0.000152659	0.00772892
ENST00000615999.4	CTSH-218	protein_coding	CTSH	cathepsin H [Source:HGNC Symbol;Acc:HGNC:2535]	793.54	786.37	789.72	790.74	790.2	789.97	511.573	538.753	551.78	670.282	679.305	743.381	33.12	34.06	34.17	43.1	42.86	46.52	615.846	0.387854	0.102445	3.78597	0.000153113	0.0077356
ENST00000308824.10	PCMTD2-203	protein_coding	PCMTD2	protein-L-isoaspartate (D-aspartate) O-methyltransferase domain containing 2 [Source:HGNC Symbol;Acc:HGNC:15882]	3664.54	3657.37	3660.72	3661.74	3661.2	3660.97	1825.25	2013.99	1993.21	1614.01	1646.45	1507.05	25.49	27.46	26.65	22.39	22.4	20.34	1766.66	-0.292073	0.0772258	-3.78206	0.000155537	0.00784153
ENST00000587686.1	TJP3-205	protein_coding	TJP3	tight junction protein 3 [Source:HGNC Symbol;Acc:HGNC:11829]	2767.54	2760.37	2763.72	2764.74	2764.2	2763.97	0.89402	0	17.5508	377.726	94.5452	67.945	0.02	0	0.31	6.95	1.7	1.22	93.1101	4.85148	1.28392	3.77864	0.000157688	0.00793331
ENST00000269033.7	SSH2-201	protein_coding	SSH2	slingshot protein phosphatase 2 [Source:HGNC Symbol;Acc:HGNC:30580]	9148.54	9141.37	9144.72	9145.74	9145.2	9144.97	635.307	662.656	689.433	537.704	482.194	491.973	3.55	3.62	3.69	2.99	2.63	2.66	583.211	-0.394225	0.104363	-3.77743	0.000158458	0.00794072
ENST00000535788.1	UBB-204	protein_coding	UBB	ubiquitin B [Source:HGNC Symbol;Acc:HGNC:12463]	525.58	518.41	521.76	522.77	522.23	522	11305	10568.5	10663.5	11908.9	12356.3	12017.1	1106.63	1010.42	999.74	1158.8	1178.84	1137.56	11469.9	0.156752	0.0414978	3.77736	0.000158497	0.00794072
ENST00000396319.6	TAX1BP1-202	protein_coding	TAX1BP1	Tax1 binding protein 1 [Source:HGNC Symbol;Acc:HGNC:11575]	2713.54	2706.37	2709.72	2710.74	2710.2	2709.97	584.675	862.963	799.819	1152.49	1139.94	1171.44	11.02	15.9	14.44	21.6	20.96	21.36	951.888	0.625251	0.165853	3.7699	0.000163312	0.00816491
ENST00000415816.6	IFI35-203	protein_coding	IFI35	interferon induced protein 35 [Source:HGNC Symbol;Acc:HGNC:5399]	1062.54	1055.37	1058.72	1059.74	1059.2	1058.97	339.047	332.36	317.654	526.684	582.09	424.89	16.35	15.69	14.67	25.25	27.38	19.83	420.454	0.629228	0.166977	3.76836	0.000164324	0.00819843
ENST00000560891.5	DMXL2-213	protein_coding	DMXL2	Dmx like 2 [Source:HGNC Symbol;Acc:HGNC:2938]	4580.54	4573.37	4576.72	4577.74	4577.2	4576.97	636.857	679.837	712.025	890.743	821.206	898.005	7.11	7.41	7.61	9.88	8.93	9.7	773.112	0.365178	0.0969521	3.76658	0.000165498	0.00823986
ENST00000464716.5	RPS24-205	protein_coding	RPS24	ribosomal protein S24 [Source:HGNC Symbol;Acc:HGNC:10411]	273.79	266.71	270	271.01	270.47	270.26	15607.7	16883.7	18045	14380.6	14186.3	14575.6	2950.54	3117.04	3267.03	2702.43	2613.76	2664.57	15613.2	-0.228153	0.0605933	-3.76532	0.000166337	0.00826451
ENST00000627286.1	ZMYND11-217	protein_coding	ZMYND11	zinc finger MYND-type containing 11 [Source:HGNC Symbol;Acc:HGNC:16966]	3735.54	3728.37	3731.72	3732.74	3732.2	3731.97	1801.14	2163.93	2252.28	1616.16	1435.75	1561.9	24.67	28.94	29.54	22	19.16	20.68	1805.19	-0.429482	0.11408	-3.76474	0.000166724	0.00826662
ENST00000367097.7	TULP4-202	protein_coding	TULP4	tubby like protein 4 [Source:HGNC Symbol;Acc:HGNC:15530]	11116.5	11109.4	11112.7	11113.7	11113.2	11113	1019.24	1078.43	1054.62	1237.48	1327.72	1250.8	4.69	4.85	4.64	5.66	5.95	5.56	1161.38	0.274756	0.0730407	3.76169	0.000168772	0.0083509
ENST00000345877.6	YAP1-202	protein_coding	YAP1	Yes associated protein 1 [Source:HGNC Symbol;Acc:HGNC:16262]	5105.54	5098.37	5101.72	5102.74	5102.2	5101.97	418.641	402.457	325.924	238.25	264.731	229.208	4.19	3.94	3.13	2.38	2.58	2.22	313.202	-0.649717	0.172799	-3.75996	0.00016994	0.0083914
ENST00000369983.3	GBF1-201	protein_coding	GBF1	golgi brefeldin A resistant guanine nucleotide exchange factor 1 [Source:HGNC Symbol;Acc:HGNC:4181]	6224.54	6217.37	6220.72	6221.74	6221.2	6220.97	3574.09	3480.74	3678.72	4032.1	3972.34	4219.04	29.36	27.93	28.95	32.93	31.81	33.52	3826.17	0.187992	0.0500221	3.75817	0.000171162	0.00841708
ENST00000396210.7	MGST1-205	protein_coding	MGST1	microsomal glutathione S-transferase 1 [Source:HGNC Symbol;Acc:HGNC:7061]	735.55	728.37	731.73	732.74	732.2	731.97	4133.9	4548.3	4990.41	5683.64	5539.74	5596.73	288.64	310.14	333.68	394.41	376.93	377.85	5082.12	0.29882	0.0795095	3.7583	0.000171074	0.00841708
ENST00000225603.8	CBX1-201	protein_coding	CBX1	chromobox 1 [Source:HGNC Symbol;Acc:HGNC:1551]	2053.54	2046.37	2049.72	2050.74	2050.2	2049.97	7425.19	8021.77	8124.74	6874.69	6992.19	6531.83	185.12	195.32	193.99	170.38	169.9	157.47	7328.4	-0.209062	0.0556621	-3.7559	0.000172717	0.0084762
ENST00000477898.5	ELMO3-203	protein_coding	ELMO3	engulfment and cell motility 3 [Source:HGNC Symbol;Acc:HGNC:17289]	2102.54	2095.37	2098.72	2099.74	2099.2	2098.97	120.645	99.3087	91.9368	180.265	210.698	171.093	2.94	2.37	2.14	4.36	5.01	4.03	145.658	0.845138	0.225372	3.74997	0.000176859	0.00866177
ENST00000357917.4	RHOBTB1-202	protein_coding	RHOBTB1	Rho related BTB domain containing 1 [Source:HGNC Symbol;Acc:HGNC:18738]	4160.54	4153.37	4156.72	4157.74	4157.2	4156.97	1025.87	1106.09	971.103	782.34	846.866	728.557	12.62	13.28	11.43	9.56	10.15	8.66	910.138	-0.39806	0.106186	-3.74869	0.000177757	0.00868802
ENST00000579294.5	FLII-222	protein_coding	FLII	FLII, actin remodeling protein [Source:HGNC Symbol;Acc:HGNC:3750]	3757.54	3750.37	3753.72	3754.74	3754.2	3753.97	1074.97	1297.9	885.868	604.184	642.914	767.034	14.64	17.25	11.55	8.18	8.52	10.1	878.81	-0.691735	0.184639	-3.74641	0.000179382	0.00874961
ENST00000201586.6	SULT2B1-201	protein_coding	SULT2B1	sulfotransferase family 2B member 1 [Source:HGNC Symbol;Acc:HGNC:11459]	1116.54	1109.37	1112.72	1113.74	1113.2	1112.97	1465.27	1333.73	1416.05	1627.3	1728.72	1736.39	67.28	59.83	62.26	74.29	77.35	77.09	1551.24	0.271788	0.0725584	3.74578	0.000179833	0.00875382
ENST00000358015.7	RAD23B-201	protein_coding	RAD23B	RAD23 homolog B, nucleotide excision repair protein [Source:HGNC Symbol;Acc:HGNC:9813]	3940.54	3933.37	3936.72	3937.74	3937.2	3936.97	10051.6	8881.9	9471.22	11102.9	11218.6	10682	130.49	112.61	117.76	143.29	141.95	134.1	10234.7	0.215949	0.0578191	3.7349	0.000187787	0.00912249
ENST00000366610.7	IRF2BP2-202	protein_coding	IRF2BP2	interferon regulatory factor 2 binding protein 2 [Source:HGNC Symbol;Acc:HGNC:21729]	4436.54	4429.37	4432.72	4433.74	4433.2	4432.97	1212.86	1378.88	1157.46	989.471	963.025	935.662	13.99	15.53	12.78	11.34	10.82	10.43	1106.23	-0.375407	0.100554	-3.73338	0.000188924	0.00914071
ENST00000428670.7	ATP2B1-204	protein_coding	ATP2B1	ATPase plasma membrane Ca2+ transporting 1 [Source:HGNC Symbol;Acc:HGNC:814]	6853.54	6846.37	6849.72	6850.74	6850.2	6849.97	1139.83	978.34	817.302	1677.47	1345.28	1430.9	8.5	7.13	5.84	12.44	9.78	10.32	1231.52	0.601935	0.161222	3.73359	0.000188772	0.00914071
ENST00000401609.5	RPL3-202	protein_coding	RPL3	ribosomal protein L3 [Source:HGNC Symbol;Acc:HGNC:10332]	1110.54	1103.37	1106.72	1107.74	1107.2	1106.97	11888.8	12340.7	13693.2	10374.1	11105.7	10365.1	548.86	556.41	605.46	476.1	499.73	462.73	11627.9	-0.252374	0.0676124	-3.73266	0.000189466	0.00914851
ENST00000433627.9	LSM14A-201	protein_coding	LSM14A	LSM14A, mRNA processing body assembly factor [Source:HGNC Symbol;Acc:HGNC:24489]	3245.54	3238.37	3241.72	3242.74	3242.2	3241.97	270.938	525.556	403.661	186.723	163.429	83.4982	4.28	8.09	6.09	2.93	2.52	1.28	272.301	-1.47204	0.394445	-3.73193	0.000190015	0.0091566
ENST00000240100.6	DUSP4-201	protein_coding	DUSP4	dual specificity phosphatase 4 [Source:HGNC Symbol;Acc:HGNC:3070]	5358.54	5351.37	5354.72	5355.74	5355.2	5354.97	308.623	317.896	310.88	171.713	206.653	225.114	2.94	2.96	2.84	1.63	1.92	2.07	256.813	-0.63229	0.169473	-3.73092	0.00019078	0.00917501
ENST00000264161.8	DARS-201	protein_coding	DARS	aspartyl-tRNA synthetase [Source:HGNC Symbol;Acc:HGNC:2678]	2182.54	2175.37	2178.72	2179.74	2179.2	2178.97	2209.28	2536.72	2600.12	2033.37	1915.19	1878.74	51.82	58.1	58.4	47.4	43.77	42.61	2195.57	-0.334191	0.0896281	-3.72864	0.000192514	0.00920309
ENST00000280562.9	PITPNM2-201	protein_coding	PITPNM2	phosphatidylinositol transfer protein membrane associated 2 [Source:HGNC Symbol;Acc:HGNC:21044]	6606.54	6599.37	6602.72	6603.74	6603.2	6602.97	186.986	224.302	191.373	84.7853	91.8461	129.338	1.45	1.69	1.42	0.65	0.69	0.97	151.438	-0.967499	0.259459	-3.72891	0.000192308	0.00920309
ENST00000339772.9	GLB1L2-201	protein_coding	GLB1L2	galactosidase beta 1 like 2 [Source:HGNC Symbol;Acc:HGNC:25129]	2973.54	2966.37	2969.72	2970.74	2970.2	2969.97	370.156	363.19	364.385	263.983	240.416	275.872	6.37	6.1	6	4.52	4.04	4.59	313.001	-0.487578	0.13073	-3.72964	0.000191751	0.00920309
ENST00000458537.7	SKIL-204	protein_coding	SKIL	SKI like proto-oncogene [Source:HGNC Symbol;Acc:HGNC:10897]	7003.54	6996.37	6999.72	7000.74	7000.2	6999.97	2134.74	2830.17	2573.91	1886.75	1877.44	1754.25	15.59	20.18	18	13.69	13.36	12.38	2176.21	-0.450002	0.120721	-3.72762	0.000193293	0.00922197
ENST00000262144.10	WDR59-201	protein_coding	WDR59	WD repeat domain 59 [Source:HGNC Symbol;Acc:HGNC:25706]	5719.54	5712.37	5715.72	5716.74	5716.2	5715.97	1486.82	1465.41	1263.57	1075.36	1104.85	926.652	13.29	12.8	10.82	9.56	9.63	8.01	1220.45	-0.441858	0.118565	-3.72672	0.000193985	0.00923661
ENST00000522663.5	MRNIP-219	protein_coding	MRNIP	MRN complex interacting protein [Source:HGNC Symbol;Acc:HGNC:30817]	2700.54	2693.37	2696.72	2697.74	2697.2	2696.97	548.912	556.135	511.483	668.528	721.244	688.456	10.4	10.29	9.29	12.6	13.33	12.61	615.793	0.362503	0.0972995	3.72565	0.000194816	0.00925781
ENST00000264170.8	KYNU-201	protein_coding	KYNU	kynureninase [Source:HGNC Symbol;Acc:HGNC:6469]	15137.5	15130.4	15133.7	15134.7	15134.2	15134	555.753	623.112	625.076	846.826	794.206	748.188	1.88	2.05	2.02	2.84	2.61	2.44	698.86	0.404826	0.108875	3.71828	0.000200585	0.00951313
ENST00000336148.9	RAD54B-202	protein_coding	RAD54B	RAD54 homolog B (S. cerevisiae) [Source:HGNC Symbol;Acc:HGNC:17228]	2889.54	2882.37	2885.72	2886.74	2886.2	2885.97	771.58	854.995	928.517	673.904	549.714	562.387	13.66	14.78	15.75	11.86	9.49	9.64	723.516	-0.51648	0.138925	-3.71769	0.000201052	0.00951644
ENST00000361627.7	ARHGAP11A-201	protein_coding	ARHGAP11A	Rho GTPase activating protein 11A [Source:HGNC Symbol;Acc:HGNC:15783]	5719.54	5712.37	5715.72	5716.74	5716.2	5715.97	2269.59	2203.76	2379.23	1874.91	1959.83	1996.56	20.29	19.24	20.37	16.67	17.08	17.26	2113.98	-0.233202	0.0628187	-3.7123	0.000205381	0.00970223
ENST00000294129.6	NCKIPSD-201	protein_coding	NCKIPSD	NCK interacting protein with SH3 domain [Source:HGNC Symbol;Acc:HGNC:15486]	2810.54	2803.37	2806.72	2807.74	2807.2	2806.97	344.204	338.401	323.436	450.697	436.259	511.634	6.27	6.01	5.65	8.15	7.75	9.01	400.772	0.47951	0.129487	3.70315	0.00021294	0.0100395
ENST00000216392.7	PYGL-201	protein_coding	PYGL	glycogen phosphorylase L [Source:HGNC Symbol;Acc:HGNC:9725]	2869.54	2862.37	2865.72	2866.74	2866.2	2865.97	252.125	271.841	268.276	129.844	186.389	118.699	4.49	4.74	4.58	2.31	3.23	2.05	204.529	-0.874717	0.236368	-3.70066	0.00021504	0.0101187
ENST00000371811.4	IFIT3-201	protein_coding	IFIT3	interferon induced protein with tetratricopeptide repeats 3 [Source:HGNC Symbol;Acc:HGNC:5411]	2276.54	2269.37	2272.72	2273.74	2273.2	2272.97	1927.88	2095.35	1566.25	3478.76	3340.12	2280.68	43.35	46.01	33.74	77.75	73.2	49.6	2448.17	0.702904	0.190122	3.69712	0.000218063	0.0102408
ENST00000370473.4	GBP1-201	protein_coding	GBP1	guanylate binding protein 1 [Source:HGNC Symbol;Acc:HGNC:4182]	2856.54	2849.37	2852.72	2853.74	2853.2	2852.97	689.317	850.496	742.146	1187.91	1157.5	948.773	12.34	14.87	12.73	21.16	20.21	16.44	929.358	0.529378	0.143321	3.69364	0.000221067	0.0103606
ENST00000371753.5	NACC2-202	protein_coding	NACC2	NACC family member 2 [Source:HGNC Symbol;Acc:HGNC:23846]	6623.54	6616.37	6619.72	6620.74	6620.2	6619.97	1125.5	1114.74	1105.62	1269.63	1408.76	1419.44	8.69	8.41	8.18	9.75	10.6	10.6	1240.61	0.292689	0.0792514	3.69317	0.000221477	0.0103606
ENST00000370082.1	HELZ2-201	protein_coding	HELZ2	helicase with zinc finger 2 [Source:HGNC Symbol;Acc:HGNC:30021]	1648.54	1641.37	1644.72	1645.74	1645.2	1644.97	931.673	719.212	682.873	1148.02	1164.22	1096.98	28.94	21.84	20.32	35.46	35.23	32.96	957.162	0.545953	0.147852	3.69257	0.000222001	0.010365
ENST00000322776.10	NDUFV1-201	protein_coding	NDUFV1	NADH:ubiquinone oxidoreductase core subunit V1 [Source:HGNC Symbol;Acc:HGNC:7716]	1417.54	1410.37	1413.72	1414.74	1414.2	1413.97	2070.77	1877.19	1900.75	1672.56	1619.36	1597.18	74.84	66.24	65.81	60.1	57.05	55.82	1789.64	-0.259344	0.0704559	-3.68094	0.000232377	0.0108283
ENST00000380359.3	NET1-202	protein_coding	NET1	neuroepithelial cell transforming 1 [Source:HGNC Symbol;Acc:HGNC:14592]	3074.54	3067.37	3070.72	3071.74	3071.2	3070.97	2930.07	3164.82	3351.33	2645.21	2406.86	2649.03	48.76	51.44	53.42	43.76	39.03	42.63	2857.89	-0.293744	0.0798323	-3.67951	0.000233683	0.010847
ENST00000618846.4	ROBO1-213	protein_coding	ROBO1	roundabout guidance receptor 1 [Source:HGNC Symbol;Acc:HGNC:10249]	7304.54	7297.37	7300.72	7301.74	7301.2	7300.97	579.775	653.708	728.717	348.803	483.543	418.301	4.06	4.47	4.89	2.43	3.3	2.83	535.475	-0.652133	0.177231	-3.67956	0.000233638	0.010847
ENST00000456935.6	MAN2B1-203	protein_coding	MAN2B1	mannosidase alpha class 2B member 1 [Source:HGNC Symbol;Acc:HGNC:6826]	3005.54	2998.37	3001.72	3002.74	3002.2	3001.97	1206.15	1335.44	1259.47	1479.81	1588.36	1696.98	20.53	22.21	20.54	25.05	26.35	27.94	1427.7	0.327911	0.0892741	3.67308	0.000239642	0.0111022
ENST00000323267.10	TMEM63B-202	protein_coding	TMEM63B	transmembrane protein 63B [Source:HGNC Symbol;Acc:HGNC:17735]	3019.54	3012.37	3015.72	3016.74	3016.2	3015.97	1586.16	1427.92	1463.39	1743.8	1859.85	1803.4	26.88	23.64	23.75	29.37	30.71	29.55	1647.42	0.270871	0.0737815	3.67126	0.000241355	0.0111385
ENST00000395952.7	ABHD16A-201	protein_coding	ABHD16A	abhydrolase domain containing 16A [Source:HGNC Symbol;Acc:HGNC:13921]	1924.54	1917.37	1920.72	1921.74	1921.2	1920.97	985.565	963.904	987.919	1126.62	1241.22	1204.21	26.23	25.05	25.17	29.79	32.19	30.98	1084.91	0.280962	0.0765269	3.67142	0.000241209	0.0111385
ENST00000320031.12	ITGA3-202	protein_coding	ITGA3	integrin subunit alpha 3 [Source:HGNC Symbol;Acc:HGNC:6139]	4709.54	4702.37	4705.72	4706.74	4706.2	4705.97	2043.89	2072.16	1990.66	2274.09	2375.83	2488.55	22.19	21.98	20.7	24.55	25.14	26.14	2207.53	0.226606	0.0618273	3.66514	0.0002472	0.0113646
ENST00000355667.10	DNM2-201	protein_coding	DNM2	dynamin 2 [Source:HGNC Symbol;Acc:HGNC:2974]	3362.54	3355.37	3358.72	3359.74	3359.2	3358.97	3063.59	2757.37	2658.47	3645.42	3294.25	4029.19	46.62	40.97	38.74	55.14	48.86	59.29	3241.38	0.372272	0.10157	3.66519	0.000247159	0.0113646
ENST00000373049.8	DIAPH2-203	protein_coding	DIAPH2	diaphanous related formin 2 [Source:HGNC Symbol;Acc:HGNC:2877]	3551.54	3544.37	3547.72	3548.74	3548.2	3547.97	59.0216	25.9369	49.308	122.338	110.754	120.335	0.84	0.37	0.68	1.75	1.56	1.67	81.2823	1.38731	0.378779	3.66259	0.00024968	0.0114567
ENST00000394054.6	NFKBIZ-203	protein_coding	NFKBIZ	NFKB inhibitor zeta [Source:HGNC Symbol;Acc:HGNC:29805]	3608.54	3601.37	3604.72	3605.74	3605.2	3604.97	328.201	365.366	357.692	230.726	266.08	216.931	4.65	5.06	4.85	3.26	3.68	2.97	294.166	-0.564104	0.154089	-3.6609	0.000251331	0.0115104
ENST00000397088.3	GPER1-202	protein_coding	GPER1	G protein-coupled estrogen receptor 1 [Source:HGNC Symbol;Acc:HGNC:4485]	2460.54	2453.37	2456.72	2457.74	2457.2	2456.97	1248.75	1002.98	1215.21	1587.04	1453.29	1742.02	25.98	20.38	24.21	32.82	29.47	35.05	1374.88	0.464114	0.127004	3.65434	0.000257846	0.0117863
ENST00000226004.7	DUSP3-201	protein_coding	DUSP3	dual specificity phosphatase 3 [Source:HGNC Symbol;Acc:HGNC:3069]	3931.54	3924.37	3927.72	3928.74	3928.2	3927.97	1853.1	1978.9	2009.91	2202.12	2356.91	2406.7	24.11	25.14	25.05	28.49	29.9	30.28	2134.6	0.254291	0.0696854	3.64913	0.000263129	0.0120049
ENST00000344087.4	NPIPA7-201	protein_coding	NPIPA7	nuclear pore complex interacting protein family member A7 [Source:HGNC Symbol;Acc:HGNC:41982]	382.64	375.48	378.82	379.84	379.3	379.07	127.736	126.277	100.374	61.0748	25.6556	42.5792	17.24	16.55	12.92	8.2	3.42	5.56	80.616	-1.44407	0.396246	-3.64438	0.000268032	0.0121823
ENST00000449058.6	TOM1-210	protein_coding	TOM1	target of myb1 membrane trafficking protein [Source:HGNC Symbol;Acc:HGNC:11982]	2210.54	2203.37	2206.72	2207.74	2207.2	2206.97	340.515	364.476	340.163	463.545	448.41	468.253	7.88	8.25	7.55	10.68	10.12	10.49	404.227	0.40435	0.110944	3.64465	0.000267754	0.0121823
ENST00000317502.10	MTG1-201	protein_coding	MTG1	mitochondrial ribosome associated GTPase 1 [Source:HGNC Symbol;Acc:HGNC:32159]	1381.54	1374.37	1377.72	1378.74	1378.2	1377.97	517.882	487.968	493.997	663.009	698.255	609.894	19.2	17.68	17.55	24.44	25.24	21.87	578.501	0.39046	0.107156	3.64383	0.00026861	0.0121854
ENST00000253462.7	GINS2-201	protein_coding	GINS2	GINS complex subunit 2 [Source:HGNC Symbol;Acc:HGNC:24575]	2494.54	2487.37	2490.72	2491.74	2491.2	2490.97	1741.31	1775.78	1882.98	1506.57	1568.09	1505.44	35.73	35.59	37	30.73	31.35	29.87	1663.36	-0.239185	0.0656858	-3.64135	0.00027121	0.0122802
ENST00000368226.8	PTPRK-207	protein_coding	PTPRK	protein tyrosine phosphatase, receptor type K [Source:HGNC Symbol;Acc:HGNC:9674]	5908.54	5901.37	5904.72	5905.74	5905.2	5904.97	3305.6	4117.73	4109.11	2732.41	2921.51	3086.11	28.61	34.8	34.07	23.51	24.64	25.83	3378.74	-0.399533	0.109747	-3.64049	0.000272122	0.0122983
ENST00000409002.7	HES6-202	protein_coding	HES6	hes family bHLH transcription factor 6 [Source:HGNC Symbol;Acc:HGNC:18254]	1107.54	1100.37	1103.72	1104.74	1104.2	1103.97	132.067	139.029	166.348	78.3073	63.4765	86.7787	6.12	6.26	7.37	3.62	2.88	3.88	111.001	-0.928	0.255461	-3.63265	0.000280525	0.0126542
ENST00000262848.5	PRKX-201	protein_coding	PRKX	protein kinase, X-linked [Source:HGNC Symbol;Acc:HGNC:9441]	5852.54	5845.37	5848.72	5849.74	5849.2	5848.97	856.141	849.928	860.766	680.42	715.857	708.086	7.48	7.25	7.2	5.91	6.09	5.98	778.533	-0.287233	0.0791466	-3.62913	0.000284375	0.0128038
ENST00000447182.6	SDCBP-204	protein_coding	SDCBP	syndecan binding protein [Source:HGNC Symbol;Acc:HGNC:10662]	1924.54	1917.37	1920.72	1921.74	1921.2	1920.97	446.766	509.041	494.795	707.089	596.975	673.733	11.88	13.22	12.6	18.69	15.47	17.33	571.4	0.450256	0.12419	3.62554	0.000288357	0.0129588
ENST00000368954.9	CERS2-205	protein_coding	CERS2	ceramide synthase 2 [Source:HGNC Symbol;Acc:HGNC:14076]	2326.54	2319.37	2322.72	2323.74	2323.2	2322.97	6411.29	5712.66	6201.45	6795.54	7604.08	7633.65	141.05	122.73	130.67	148.63	163.05	162.41	6726.44	0.26552	0.0732569	3.6245	0.000289522	0.0129868
ENST00000340006.6	CSRP1-201	protein_coding	CSRP1	cysteine and glycine rich protein 1 [Source:HGNC Symbol;Acc:HGNC:2469]	1773.54	1766.37	1769.72	1770.74	1770.2	1769.97	7221.31	7111.94	8025.51	8577.1	8587.21	9181.81	208.5	200.54	221.94	246.2	241.64	256.38	8117.48	0.236749	0.0653429	3.62317	0.000291009	0.0130292
ENST00000372422.6	YIPF3-202	protein_coding	YIPF3	Yip1 domain family member 3 [Source:HGNC Symbol;Acc:HGNC:21023]	1397.54	1390.37	1393.72	1394.74	1394.2	1393.97	1876.93	1967.63	2051.21	2220.77	2389.2	2437.94	68.81	70.47	72.03	80.94	85.39	86.45	2157.28	0.257662	0.0712735	3.61512	0.000300211	0.0134161
ENST00000225927.6	NAGLU-201	protein_coding	NAGLU	N-acetyl-alpha-glucosaminidase [Source:HGNC Symbol;Acc:HGNC:7632]	2365.54	2358.37	2361.72	2362.74	2362.2	2361.97	995.727	820.263	910.157	1172.83	1195.31	1153.44	21.55	17.33	18.86	25.22	25.21	24.14	1041.29	0.367249	0.101626	3.61373	0.000301826	0.0134299
ENST00000370053.2	STMN3-201	protein_coding	STMN3	stathmin 3 [Source:HGNC Symbol;Acc:HGNC:15926]	2076.54	2069.37	2072.72	2073.74	2073.2	2072.97	670.237	536.053	518.19	328.338	402.487	392.122	16.52	12.9	12.23	8.04	9.67	9.34	474.571	-0.619729	0.171508	-3.61341	0.000302198	0.0134299
ENST00000397910.8	MUC16-201	protein_coding	MUC16	mucin 16, cell surface associated [Source:HGNC Symbol;Acc:HGNC:15582]	43637.5	43630.4	43633.7	43634.7	43634.2	43634	587.163	399.945	362.672	255.45	160.733	239.844	0.69	0.46	0.41	0.3	0.18	0.27	334.301	-1.03765	0.287136	-3.6138	0.000301745	0.0134299
ENST00000342232.4	JPH1-201	protein_coding	JPH1	junctophilin 1 [Source:HGNC Symbol;Acc:HGNC:14201]	4199.54	4192.37	4195.72	4196.74	4196.2	4195.97	448.095	490.466	513.13	360.585	367.381	345.45	5.46	5.83	5.98	4.37	4.37	4.07	420.851	-0.437561	0.121133	-3.61223	0.00030357	0.0134659
ENST00000356362.6	PUS7-201	protein_coding	PUS7	pseudouridylate synthase 7 (putative) [Source:HGNC Symbol;Acc:HGNC:26033]	3301.54	3294.37	3297.72	3298.74	3298.2	3297.97	1377.07	1458.22	1520.2	1185.8	1037.3	1203.36	21.35	22.07	22.57	18.27	15.68	18.04	1296.99	-0.343776	0.0952584	-3.60888	0.000307522	0.013591
ENST00000380985.9	NLN-201	protein_coding	NLN	neurolysin [Source:HGNC Symbol;Acc:HGNC:16058]	8482.54	8475.37	8478.72	8479.74	8479.2	8478.97	1174.84	1133.76	1336.25	934.805	815.812	965.119	7.08	6.67	7.71	5.6	4.79	5.63	1060.1	-0.423082	0.117224	-3.60918	0.000307171	0.013591
ENST00000606343.1	AL365181.2-201	lincRNA	AL365181.2		3043.54	3036.37	3039.72	3040.74	3040.2	3039.97	118.918	133.091	109.482	192.086	187.74	192.374	2	2.19	1.76	3.21	3.08	3.13	155.615	0.667763	0.185172	3.60618	0.000310735	0.0137078
ENST00000254806.7	WBP2-201	protein_coding	WBP2	WW domain binding protein 2 [Source:HGNC Symbol;Acc:HGNC:12738]	1765.54	1758.37	1761.72	1762.74	1762.2	1761.97	2044.07	1765.59	1797.84	2214.55	2332.51	2437.08	59.3	50.02	49.93	63.86	65.92	68.35	2098.61	0.316667	0.0878412	3.60499	0.000312159	0.0137453
ENST00000265896.9	SQLE-201	protein_coding	SQLE	squalene epoxidase [Source:HGNC Symbol;Acc:HGNC:11279]	2782.54	2775.37	2778.72	2779.74	2779.2	2778.97	2726.78	2618.13	2864.96	3581.96	3053.81	3564.25	50.15	47.03	50.46	65.49	54.75	63.38	3068.32	0.313775	0.0870512	3.60449	0.000312764	0.0137467
ENST00000318312.11	BBS1-201	protein_coding	BBS1	Bardet-Biedl syndrome 1 [Source:HGNC Symbol;Acc:HGNC:966]	3244.54	3237.37	3240.72	3241.74	3241.2	3240.97	416.69	411.648	388.618	503.294	551.067	544.375	6.57	6.34	5.87	7.89	8.47	8.3	469.282	0.394122	0.109365	3.60375	0.000313658	0.0137608
ENST00000257857.8	CD63-201	protein_coding	CD63	CD63 molecule [Source:HGNC Symbol;Acc:HGNC:1692]	891.54	884.37	887.72	888.74	888.2	887.97	4162.32	4510.27	4465.01	4857.57	5169.82	5428.72	239.55	253.5	246.12	277.92	290	302.14	4765.62	0.235084	0.0652498	3.60284	0.000314763	0.0137739
ENST00000324817.5	MED14-201	protein_coding	MED14	mediator complex subunit 14 [Source:HGNC Symbol;Acc:HGNC:2370]	7805.54	7798.37	7801.72	7802.74	7802.2	7801.97	1626.64	1647.74	1637.94	1424.2	1364.19	1439.9	10.66	10.54	10.28	9.28	8.71	9.12	1523.43	-0.214336	0.0595032	-3.60208	0.000315677	0.0137739
ENST00000580666.5	SLC16A6-202	protein_coding	SLC16A6	solute carrier family 16 member 6 [Source:HGNC Symbol;Acc:HGNC:10927]	2480.54	2473.37	2476.72	2477.74	2477.2	2476.97	98.328	69.9485	72.7117	159.885	135.064	163.724	2.04	1.41	1.43	3.28	2.71	3.27	116.61	0.929128	0.257935	3.60218	0.000315558	0.0137739
ENST00000371485.7	CEP55-201	protein_coding	CEP55	centrosomal protein 55 [Source:HGNC Symbol;Acc:HGNC:1161]	2459.54	2452.37	2455.72	2456.74	2456.2	2455.97	2324.09	2391.82	2668.61	2098.89	1975.98	1964.69	48.37	48.6	53.19	43.42	40.07	39.53	2237.35	-0.290612	0.0807325	-3.59969	0.000318594	0.0138759
ENST00000355295.4	TDRD7-201	protein_coding	TDRD7	tudor domain containing 7 [Source:HGNC Symbol;Acc:HGNC:30831]	3655.54	3648.37	3651.72	3652.74	3652.2	3651.97	1768.91	1888.83	1850.3	2181.71	2254.25	2065.34	24.75	25.82	24.8	30.35	30.74	27.95	2001.56	0.23806	0.0661749	3.59744	0.000321361	0.0139711
ENST00000337714.7	AKAP1-202	protein_coding	AKAP1	A-kinase anchoring protein 1 [Source:HGNC Symbol;Acc:HGNC:367]	3791.54	3784.37	3787.72	3788.74	3788.2	3787.97	4986.74	5136.29	5136.36	4592.02	4551.73	4709.44	67.28	67.69	66.37	61.58	59.86	61.44	4852.09	-0.138466	0.0385158	-3.59504	0.000324338	0.0140242
ENST00000541377.5	CLASP1-215	protein_coding	CLASP1	cytoplasmic linker associated protein 1 [Source:HGNC Symbol;Acc:HGNC:17088]	7730.54	7723.37	7726.72	7727.74	7727.2	7726.97	1375.21	1262.3	1221.77	987.387	1092.7	987.222	9.09	8.16	7.74	6.49	7.04	6.32	1154.43	-0.333467	0.0927482	-3.5954	0.000323893	0.0140242
ENST00000599638.2	KIAA1683-205	protein_coding	KIAA1683	KIAA1683 [Source:HGNC Symbol;Acc:HGNC:29350]	5341.54	5334.37	5337.72	5338.74	5338.2	5337.97	153.864	157.821	159.619	261.862	210.705	273.412	1.47	1.48	1.46	2.49	1.96	2.53	202.88	0.667849	0.185742	3.59558	0.000323672	0.0140242
ENST00000354947.9	PIP4K2C-201	protein_coding	PIP4K2C	phosphatidylinositol-5-phosphate 4-kinase type 2 gamma [Source:HGNC Symbol;Acc:HGNC:23786]	2745.54	2738.37	2741.72	2742.74	2742.2	2741.97	2028.51	2213.21	2311.7	2626.91	2545.97	2666.23	37.81	40.28	41.27	48.67	46.26	48.06	2398.75	0.259017	0.072163	3.58934	0.000331519	0.014309
ENST00000432768.6	ZHX3-205	protein_coding	ZHX3	zinc fingers and homeoboxes 3 [Source:HGNC Symbol;Acc:HGNC:15935]	3372.54	3365.37	3368.72	3369.74	3369.2	3368.97	478.408	446.59	477.204	306.915	372.781	289.787	7.26	6.61	6.93	4.63	5.52	4.26	395.281	-0.53919	0.150246	-3.58872	0.00033231	0.0143174
ENST00000633556.1	CRYBG1-204	protein_coding	CRYBG1	crystallin beta-gamma domain containing 1 [Source:HGNC Symbol;Acc:HGNC:356]	9730.54	9723.37	9726.72	9727.74	9727.2	9726.97	1152.53	1190.05	1411.45	1761.23	1542.48	2006.36	6.06	6.11	7.11	9.2	7.9	10.2	1510.68	0.501129	0.139686	3.58754	0.000333813	0.0143563
ENST00000263119.9	CABIN1-201	protein_coding	CABIN1	calcineurin binding protein 1 [Source:HGNC Symbol;Acc:HGNC:24187]	7043.54	7036.37	7039.72	7040.74	7040.2	7039.97	1440.46	1022.28	1066.34	714.776	723.964	848.881	10.46	7.25	7.42	5.16	5.13	5.96	969.451	-0.624689	0.174182	-3.58642	0.000335252	0.0143714
ENST00000348581.9	EXO1-201	protein_coding	EXO1	exonuclease 1 [Source:HGNC Symbol;Acc:HGNC:3511]	3013.54	3006.37	3009.72	3010.74	3010.2	3009.97	499.808	589.893	551.592	418.511	403.844	382.292	8.48	9.77	8.97	7.07	6.68	6.28	474.323	-0.446272	0.124469	-3.5854	0.000336558	0.0143714
ENST00000412055.5	PRRT3-203	protein_coding	PRRT3	proline rich transmembrane protein 3 [Source:HGNC Symbol;Acc:HGNC:26591]	3582.54	3575.37	3578.72	3579.74	3579.2	3578.97	628.675	523.244	527.345	719.005	771.226	804.691	8.98	7.3	7.21	10.2	10.74	11.11	662.364	0.450401	0.125613	3.58563	0.000336271	0.0143714
ENST00000593832.1	COLGALT1-202	protein_coding	COLGALT1	collagen beta(1-O)galactosyltransferase 1 [Source:HGNC Symbol;Acc:HGNC:26182]	2762.54	2755.37	2758.72	2759.74	2759.2	2758.97	204.73	221.094	266.606	135.209	144.519	144.895	3.79	3.99	4.73	2.49	2.6	2.6	186.175	-0.70688	0.197112	-3.58619	0.00033555	0.0143714
ENST00000308302.3	GOLT1A-201	protein_coding	GOLT1A	golgi transport 1A [Source:HGNC Symbol;Acc:HGNC:24766]	704.55	697.38	700.73	701.74	701.2	700.97	149.645	161.948	162.198	249.856	220.13	238.248	10.91	11.53	11.32	18.11	15.64	16.79	197.004	0.582873	0.162748	3.58144	0.000341702	0.0145651
ENST00000378204.6	EXT1-201	protein_coding	EXT1	exostosin glycosyltransferase 1 [Source:HGNC Symbol;Acc:HGNC:3512]	8091.54	8084.37	8087.72	8088.74	8088.2	8087.97	304.217	282.884	315.052	214.65	202.602	216.108	1.92	1.75	1.9	1.35	1.24	1.32	255.919	-0.509799	0.142524	-3.57693	0.000347657	0.0147665
ENST00000392452.2	MB21D2-201	protein_coding	MB21D2	Mab-21 domain containing 2 [Source:HGNC Symbol;Acc:HGNC:30438]	3189.54	3182.37	3185.72	3186.74	3186.2	3185.97	801.175	871.809	896.748	1018.39	1175.07	1104.31	12.85	13.66	13.78	16.24	18.37	17.13	977.916	0.358913	0.100341	3.57694	0.000347634	0.0147665
ENST00000479563.5	RPL14-208	protein_coding	RPL14	ribosomal protein L14 [Source:HGNC Symbol;Acc:HGNC:10305]	615.56	608.39	611.74	612.75	612.21	611.98	8767.56	8593.29	9368.07	7314.55	7762.45	8044.96	732.06	700.79	749.21	607.17	631.72	649.57	8308.48	-0.209155	0.0585082	-3.5748	0.000350502	0.014861
ENST00000542928.5	COPS2-203	protein_coding	COPS2	COP9 signalosome subunit 2 [Source:HGNC Symbol;Acc:HGNC:30747]	1401.54	1394.37	1397.72	1398.74	1398.2	1397.97	216.983	206.701	201.443	281.083	356.556	306.175	7.93	7.4	7.04	10.23	12.73	10.83	261.49	0.590964	0.16538	3.57337	0.000352418	0.0149159
ENST00000229281.5	C12orf57-201	protein_coding	C12orf57	chromosome 12 open reading frame 57 [Source:HGNC Symbol;Acc:HGNC:29521]	381.64	374.48	377.83	378.84	378.3	378.08	658.186	598.412	570.45	752.188	803.431	817.178	88.98	79.01	73.82	101.01	105.74	106.85	699.974	0.377329	0.105656	3.57131	0.000355198	0.0150071
ENST00000347697.6	EPN2-202	protein_coding	EPN2	epsin 2 [Source:HGNC Symbol;Acc:HGNC:18639]	4485.54	4478.37	4481.72	4482.74	4482.2	4481.97	1360.46	1457.79	1409.01	1205.18	1160.22	1203.34	15.51	16.24	15.39	13.66	12.89	13.27	1299.33	-0.242346	0.0679127	-3.56849	0.000359047	0.0151431
ENST00000300134.7	STAT6-201	protein_coding	STAT6	signal transducer and activator of transcription 6 [Source:HGNC Symbol;Acc:HGNC:11368]	3855.54	3848.37	3851.72	3852.74	3852.2	3851.97	996.29	920.119	824.022	1211.59	1323.65	1130.49	13.22	11.92	10.47	15.98	17.12	14.51	1067.69	0.41841	0.117332	3.56604	0.000362412	0.0152069
ENST00000450649.6	SCUBE2-202	protein_coding	SCUBE2	signal peptide, CUB domain and EGF like domain containing 2 [Source:HGNC Symbol;Acc:HGNC:30425]	2733.54	2726.37	2729.72	2730.74	2730.2	2729.97	244.958	263.963	200.581	145.939	126.961	151.444	4.58	4.83	3.59	2.71	2.33	2.74	188.974	-0.734248	0.205928	-3.56555	0.000363096	0.0152069
ENST00000473341.5	PARP12-205	protein_coding	PARP12	poly(ADP-ribose) polymerase family member 12 [Source:HGNC Symbol;Acc:HGNC:21919]	2682.54	2675.37	2678.72	2679.74	2679.2	2678.97	860.014	965.632	919.333	1081.66	1304.72	1207.46	16.41	17.98	16.8	20.51	24.25	22.28	1056.47	0.38845	0.108943	3.56564	0.000362972	0.0152069
ENST00000490107.5	SMYD3-214	protein_coding	SMYD3	SET and MYND domain containing 3 [Source:HGNC Symbol;Acc:HGNC:15513]	1369.54	1362.37	1365.72	1366.74	1366.2	1365.97	483.941	517.349	515.73	398.018	376.815	388.04	18.12	18.91	18.48	14.79	13.72	14.05	446.649	-0.38199	0.107124	-3.56588	0.000362635	0.0152069
ENST00000591198.5	SEPT9-237	protein_coding	2009-09-01	septin 9 [Source:HGNC Symbol;Acc:HGNC:7323]	1981.54	1974.37	1977.72	1978.74	1978.2	1977.97	398.536	489.826	346.856	236.056	279.579	197.29	10.31	12.36	8.58	6.05	7.05	4.94	324.69	-0.796191	0.223615	-3.56054	0.000370089	0.0154728
ENST00000377122.8	NEBL-202	protein_coding	NEBL	nebulette [Source:HGNC Symbol;Acc:HGNC:16932]	9037.54	9030.37	9033.72	9034.74	9034.2	9033.97	1059.44	1231.78	1291.12	923.003	929.27	897.175	5.99	6.81	6.99	5.19	5.13	4.91	1055.3	-0.382217	0.107386	-3.55929	0.000371863	0.01552
ENST00000306645.9	C17orf62-201	protein_coding	C17orf62	chromosome 17 open reading frame 62 [Source:HGNC Symbol;Acc:HGNC:28672]	1914.54	1907.37	1910.72	1911.74	1911.2	1910.97	311.84	220.097	258.263	398.072	447.056	400.31	8.33	5.75	6.62	10.58	11.64	10.35	339.273	0.652198	0.18372	3.54996	0.000385292	0.01602
ENST00000375224.1	UBR4-202	protein_coding	UBR4	ubiquitin protein ligase E3 component n-recognin 4 [Source:HGNC Symbol;Acc:HGNC:30313]	3296.54	3289.37	3292.72	3293.74	3293.2	3292.97	938.91	894.331	857.465	1080.64	1068.37	1136.23	14.57	13.55	12.74	16.68	16.16	17.06	995.99	0.289752	0.08163	3.54958	0.000385847	0.01602
ENST00000458431.6	TDRKH-207	protein_coding	TDRKH	tudor and KH domain containing [Source:HGNC Symbol;Acc:HGNC:11713]	2589.54	2582.37	2585.72	2586.74	2586.2	2585.97	227.062	280.905	300.874	443.177	368.725	468.249	4.48	5.43	5.69	8.71	7.11	8.96	348.165	0.665391	0.187428	3.55012	0.000385063	0.01602
ENST00000340134.4	IFITM10-201	protein_coding	IFITM10	interferon induced transmembrane protein 10 [Source:HGNC Symbol;Acc:HGNC:40022]	3527.54	3520.37	3523.72	3524.74	3524.2	3523.97	199.42	295.457	225.647	444.279	495.691	347.908	2.9	4.19	3.13	6.41	7.01	4.88	334.734	0.838062	0.236358	3.54573	0.000391527	0.0162278
ENST00000264346.11	HERC6-201	protein_coding	HERC6	HECT and RLD domain containing E3 ubiquitin protein ligase family member 6 [Source:HGNC Symbol;Acc:HGNC:26072]	3600.54	3593.37	3596.72	3597.74	3597.2	3596.97	1871.73	1933.96	2203.82	2598.08	2405.52	2462.37	26.6	26.84	29.99	36.7	33.31	33.83	2245.91	0.31271	0.0882215	3.5446	0.000393203	0.0162459
ENST00000332262.9	GPRASP2-201	protein_coding	GPRASP2	G protein-coupled receptor associated sorting protein 2 [Source:HGNC Symbol;Acc:HGNC:25169]	3541.54	3534.37	3537.72	3538.74	3538.2	3537.97	287.953	342.819	300.027	402.427	464.626	459.239	4.15	4.84	4.15	5.77	6.55	6.41	376.182	0.513222	0.144799	3.54437	0.000393559	0.0162459
ENST00000336395.5	TESK1-201	protein_coding	TESK1	testis-specific kinase 1 [Source:HGNC Symbol;Acc:HGNC:11731]	2242.54	2235.37	2238.72	2239.74	2239.2	2238.97	307.453	310.305	288.344	386.289	433.553	411.767	7.02	6.91	6.3	8.78	9.63	9.09	356.285	0.442562	0.124874	3.54407	0.000393995	0.0162459
ENST00000581977.6	IKBKE-203	protein_coding	IKBKE	inhibitor of nuclear factor kappa B kinase subunit epsilon [Source:HGNC Symbol;Acc:HGNC:14552]	3042.54	3035.37	3038.72	3039.74	3039.2	3038.97	823.486	813.208	765.541	934.676	1023.79	1039.64	13.85	13.35	12.33	15.63	16.78	16.9	900.057	0.320649	0.0905203	3.54229	0.000396665	0.0163279
ENST00000257570.9	OASL-201	protein_coding	OASL	2'-5'-oligoadenylate synthetase like [Source:HGNC Symbol;Acc:HGNC:8090]	3087.54	3080.37	3083.72	3084.74	3084.2	3083.97	1161.48	1042.15	1084.79	1637.57	1542.44	1279.49	19.24	16.86	17.22	26.97	24.91	20.5	1291.32	0.437686	0.123612	3.54081	0.0003989	0.0163918
ENST00000442157.1	IMPDH2-203	protein_coding	IMPDH2	inosine monophosphate dehydrogenase 2 [Source:HGNC Symbol;Acc:HGNC:6053]	686.55	679.38	682.73	683.74	683.2	682.98	273.423	215.206	210.694	135.113	153.956	132.632	20.49	15.74	15.1	10.03	11.24	9.57	186.837	-0.734838	0.207766	-3.53685	0.000404935	0.0166113
ENST00000409618.5	ATG9A-205	protein_coding	ATG9A	autophagy related 9A [Source:HGNC Symbol;Acc:HGNC:22408]	3846.54	3839.37	3842.72	3843.74	3843.2	3842.97	331.798	222.137	384.432	564.48	548.368	535.368	4.41	2.89	4.89	7.46	7.11	6.89	431.097	0.809315	0.228912	3.53549	0.000407019	0.0166416
ENST00000620965.4	NDUFA10-214	protein_coding	NDUFA10	NADH:ubiquinone oxidoreductase subunit A10 [Source:HGNC Symbol;Acc:HGNC:7684]	1310.54	1303.37	1306.72	1307.74	1307.2	1306.97	2328.37	2331.75	2399.81	2126.29	2028.58	1959.04	91.04	89.06	89.89	82.64	77.32	74.09	2195.64	-0.208668	0.0590215	-3.53546	0.00040706	0.0166416
ENST00000563060.6	ALDOA-209	protein_coding	ALDOA	aldolase, fructose-bisphosphate A [Source:HGNC Symbol;Acc:HGNC:414]	1371.54	1364.37	1367.72	1368.74	1368.2	1367.97	7807.38	7199.93	7695.83	8513.95	8512.77	8344.5	291.68	262.67	275.35	316.17	309.94	301.46	8012.39	0.159563	0.045155	3.53368	0.000409813	0.0167257
ENST00000379593.1	EIF1AX-201	protein_coding	EIF1AX	eukaryotic translation initiation factor 1A, X-linked [Source:HGNC Symbol;Acc:HGNC:3250]	586.56	579.39	582.74	583.76	583.22	582.99	525.911	538.524	549.362	438.503	395.678	408.553	46.11	46.13	46.14	38.2	33.82	34.65	476.088	-0.375993	0.10643	-3.53277	0.000411226	0.0167265
ENST00000545314.5	AK4-207	protein_coding	AK4	adenylate kinase 4 [Source:HGNC Symbol;Acc:HGNC:363]	6708.54	6701.37	6704.72	6705.74	6705.2	6704.97	514.439	303.199	108.639	13.952	41.871	0	3.92	2.26	0.79	0.11	0.31	0	163.683	-4.06848	1.15152	-3.53314	0.000410658	0.0167265
ENST00000527316.5	DHCR7-206	protein_coding	DHCR7	7-dehydrocholesterol reductase [Source:HGNC Symbol;Acc:HGNC:2860]	826.54	819.37	822.72	823.74	823.2	822.97	90.9225	95.056	82.7655	178.033	162.062	134.266	5.64	5.8	4.91	10.98	9.83	8.06	123.851	0.818351	0.231874	3.5293	0.000416666	0.016919
ENST00000428304.6	ABHD4-203	protein_coding	ABHD4	abhydrolase domain containing 4 [Source:HGNC Symbol;Acc:HGNC:20154]	3187.54	3180.37	3183.72	3184.74	3184.2	3183.97	507.887	532.334	503.951	613.823	745.56	766.219	8.16	8.35	7.75	9.8	11.66	11.89	611.629	0.462125	0.130969	3.5285	0.000417928	0.0169416
ENST00000393773.7	CHMP3-202	protein_coding	CHMP3	charged multivesicular body protein 3 [Source:HGNC Symbol;Acc:HGNC:29865]	548.57	541.4	544.75	545.77	545.22	545	179.679	117.961	141.318	298.029	293.045	223.519	16.83	10.81	12.68	27.78	26.72	20.25	208.925	0.886181	0.251695	3.52085	0.000430173	0.0174086
ENST00000371899.8	SLC2A6-202	protein_coding	SLC2A6	solute carrier family 2 member 6 [Source:HGNC Symbol;Acc:HGNC:11011]	2349.54	2342.37	2345.72	2346.74	2346.2	2345.97	243.12	256.123	277.477	341.226	376.827	369.198	5.3	5.45	5.79	7.4	8.01	7.77	310.662	0.483778	0.137566	3.51669	0.000436965	0.0176537
ENST00000552370.5	TMBIM6-225	protein_coding	TMBIM6	transmembrane BAX inhibitor motif containing 6 [Source:HGNC Symbol;Acc:HGNC:11723]	703.55	696.38	699.73	700.74	700.2	699.97	655.582	851.65	1087.73	1223.54	1567.92	1577.68	47.88	60.7	76.06	88.81	111.6	111.36	1160.68	0.751336	0.213694	3.51594	0.000438194	0.0176736
ENST00000370903.7	IGSF1-204	protein_coding	IGSF1	immunoglobulin superfamily member 1 [Source:HGNC Symbol;Acc:HGNC:5948]	4415.54	4408.37	4411.72	4412.74	4412.2	4411.97	808.571	966.232	877.498	1432.69	1391.19	1056.81	9.36	10.93	9.73	16.49	15.7	11.84	1088.83	0.548296	0.156036	3.51391	0.000441568	0.0177798
ENST00000002501.10	DBNDD1-201	protein_coding	DBNDD1	dysbindin domain containing 1 [Source:HGNC Symbol;Acc:HGNC:28455]	1900.54	1893.37	1896.72	1897.74	1897.2	1896.97	2752.91	2500.12	2386.22	1993.58	2136.68	2140.72	74.17	65.78	61.57	53.4	56.09	55.78	2318.37	-0.284748	0.0810592	-3.51284	0.000443343	0.0178114
ENST00000223528.6	FKTN-201	protein_coding	FKTN	fukutin [Source:HGNC Symbol;Acc:HGNC:3622]	7185.54	7178.37	7181.72	7182.74	7182.2	7181.97	1045.02	1075.25	1142.38	932.645	826.616	824.323	7.43	7.47	7.78	6.59	5.73	5.67	974.372	-0.337116	0.095987	-3.5121	0.00044458	0.0178114
ENST00000261377.10	REXO5-201	protein_coding	REXO5	RNA exonuclease 5 [Source:HGNC Symbol;Acc:HGNC:24661]	2543.54	2536.37	2539.72	2540.74	2540.2	2539.97	170.739	175.993	254.908	113.745	68.8827	97.4155	3.43	3.45	4.91	2.28	1.36	1.9	146.947	-1.09919	0.312938	-3.51249	0.000443931	0.0178114
ENST00000367409.8	ASPM-203	protein_coding	ASPM	abnormal spindle microtubule assembly [Source:HGNC Symbol;Acc:HGNC:19048]	10708.5	10701.4	10704.7	10705.7	10705.2	10705	2805.35	2753.02	3040.17	2530.77	2113.82	2167.62	13.39	12.83	13.9	12.01	9.83	10.01	2568.46	-0.336069	0.0957326	-3.51049	0.000447277	0.0178853
ENST00000637782.1	ALDH7A1-234	protein_coding	ALDH7A1	aldehyde dehydrogenase 7 family member A1 [Source:HGNC Symbol;Acc:HGNC:877]	1594.54	1587.37	1590.72	1591.74	1591.2	1590.97	1611.33	1560.48	1764.45	1308.94	1121	1359.76	51.75	48.94	54.28	41.81	35.09	42.23	1454.33	-0.379674	0.108166	-3.51011	0.000447916	0.0178853
ENST00000369026.2	MCL1-202	protein_coding	MCL1	MCL1, BCL2 family apoptosis regulator [Source:HGNC Symbol;Acc:HGNC:6943]	3753.54	3746.37	3749.72	3750.74	3750.2	3749.97	7870.86	8173.04	7921.83	8598.08	9085.89	8691.96	107.27	108.79	103.41	116.49	120.69	114.56	8390.28	0.137975	0.0393151	3.50947	0.000448999	0.0178988
ENST00000421782.3	RAD51C-203	protein_coding	RAD51C	RAD51 paralog C [Source:HGNC Symbol;Acc:HGNC:9820]	388.64	381.48	384.82	385.83	385.29	385.07	657.396	691.565	719.33	557.199	552.282	531.414	87.28	89.63	91.39	73.46	71.5	68.21	618.197	-0.335429	0.0957479	-3.50325	0.000459623	0.0182919
ENST00000521555.6	NPIPB5-210	protein_coding	NPIPB5	nuclear pore complex interacting protein family member B5 [Source:HGNC Symbol;Acc:HGNC:37233]	3618.54	3611.37	3614.72	3615.74	3615.2	3614.97	635.835	621.345	590.86	726.518	845.512	868.542	8.99	8.57	8.01	10.21	11.65	11.88	714.769	0.402043	0.114798	3.50218	0.000461471	0.0183351
ENST00000346473.7	DDIT3-201	protein_coding	DDIT3	DNA damage inducible transcript 3 [Source:HGNC Symbol;Acc:HGNC:2726]	727.55	720.37	723.73	724.74	724.2	723.97	210.248	247.979	210.687	307.772	345.727	318.48	14.85	17.13	14.23	21.58	23.76	21.75	273.482	0.540727	0.154475	3.50041	0.000464537	0.0184264
ENST00000553369.5	SRSF5-202	protein_coding	SRSF5	serine and arginine rich splicing factor 5 [Source:HGNC Symbol;Acc:HGNC:10787]	434.61	427.44	430.79	431.81	431.26	431.04	252.197	102.267	139.67	329.013	401.059	551.868	29.85	11.83	15.86	38.79	46.36	63.3	296.012	1.37408	0.392635	3.49964	0.000465892	0.0184496
ENST00000261772.12	AARS-201	protein_coding	AARS	alanyl-tRNA synthetase [Source:HGNC Symbol;Acc:HGNC:20]	3298.54	3291.37	3294.72	3295.74	3295.2	3294.97	13515.8	12600.7	13503.8	14998	14285.9	14825.8	209.64	190.88	200.61	231.25	215.96	222.38	13955	0.154775	0.0442837	3.49508	0.000473928	0.0187229
ENST00000374490.7	HMGCL-203	protein_coding	HMGCL	3-hydroxymethyl-3-methylglutaryl-CoA lyase [Source:HGNC Symbol;Acc:HGNC:5005]	1421.54	1414.37	1417.72	1418.74	1418.2	1417.97	766.162	786.111	792.395	1014.91	929.208	930.803	27.6	27.68	27.34	36.35	32.66	32.45	869.932	0.294227	0.0841892	3.49484	0.000474352	0.0187229
ENST00000312055.9	CKAP5-201	protein_coding	CKAP5	cytoskeleton associated protein 5 [Source:HGNC Symbol;Acc:HGNC:28959]	6353.54	6346.37	6349.72	6350.74	6350.2	6349.97	1790.2	1836.16	1772.5	1351.19	1500.6	1570.07	14.41	14.44	13.66	10.81	11.77	12.22	1636.79	-0.286878	0.0822474	-3.48799	0.000486668	0.0191347
ENST00000357235.5	CDC42SE1-201	protein_coding	CDC42SE1	CDC42 small effector 1 [Source:HGNC Symbol;Acc:HGNC:17719]	2866.54	2859.37	2862.72	2863.74	2863.2	2862.97	4078.7	4413.76	4493.83	4839.65	4979.84	5081.14	72.82	76.95	76.83	85.88	86.65	87.72	4647.82	0.19871	0.0569728	3.48782	0.000486985	0.0191347
ENST00000558583.2	SHISA9-203	protein_coding	SHISA9	shisa family member 9 [Source:HGNC Symbol;Acc:HGNC:37231]	6545.54	6538.37	6541.72	6542.74	6542.2	6541.97	391.863	391.121	408.652	291.919	307.954	298.787	3.06	2.98	3.06	2.27	2.35	2.26	348.383	-0.408973	0.117261	-3.48771	0.000487178	0.0191347
ENST00000248041.12	CYP4F11-201	protein_coding	CYP4F11	cytochrome P450 family 4 subfamily F member 11 [Source:HGNC Symbol;Acc:HGNC:13265]	2798.54	2791.37	2794.72	2795.74	2795.2	2794.97	548.936	553.853	493.094	665.314	672.622	720.381	10.03	9.9	8.64	12.09	11.98	12.74	609.033	0.370238	0.10628	3.4836	0.000494717	0.0193288
ENST00000263642.2	IFIH1-201	protein_coding	IFIH1	interferon induced with helicase C domain 1 [Source:HGNC Symbol;Acc:HGNC:18873]	3416.54	3409.37	3412.72	3413.74	3413.2	3412.97	2233.79	2503.58	2387.69	2991.89	2982.25	2674.39	33.46	36.61	34.24	44.54	43.54	38.73	2628.93	0.279067	0.0801165	3.48326	0.000495341	0.0193288
ENST00000399816.3	UBE2QL1-201	protein_coding	UBE2QL1	ubiquitin conjugating enzyme E2 Q family like 1 [Source:HGNC Symbol;Acc:HGNC:37269]	4138.54	4131.37	4134.72	4135.74	4135.2	4134.97	220.914	233.397	261.579	313.365	374.134	374.92	2.73	2.82	3.1	3.85	4.51	4.48	296.385	0.568468	0.16318	3.4837	0.000494537	0.0193288
ENST00000409339.3	NCAPG2-202	protein_coding	NCAPG2	non-SMC condensin II complex subunit G2 [Source:HGNC Symbol;Acc:HGNC:21904]	5074.54	5067.37	5070.72	5071.74	5071.2	5070.97	417.745	452.061	421.194	338.058	316.057	291.421	4.21	4.45	4.06	3.38	3.11	2.84	372.756	-0.4506	0.129329	-3.48413	0.000493731	0.0193288
ENST00000564079.5	TUBGCP4-208	protein_coding	TUBGCP4	tubulin gamma complex associated protein 4 [Source:HGNC Symbol;Acc:HGNC:16691]	6619.54	6612.37	6615.72	6616.74	6616.2	6615.97	1091.5	1040.35	1115.64	919.759	869.836	907.003	8.43	7.85	8.25	7.07	6.55	6.77	990.682	-0.268033	0.076969	-3.48236	0.000497022	0.0193629
ENST00000245907.10	C3-201	protein_coding	C3	complement C3 [Source:HGNC Symbol;Acc:HGNC:1318]	5084.54	5077.37	5080.72	5081.74	5081.2	5080.97	1083.27	998.818	1130.71	1406.96	1266.93	1317.94	10.9	9.81	10.89	14.07	12.42	12.82	1200.77	0.31243	0.0897533	3.48098	0.000499574	0.0194307
ENST00000290949.7	ATP6V0D1-201	protein_coding	ATP6V0D1	ATPase H+ transporting V0 subunit d1 [Source:HGNC Symbol;Acc:HGNC:13724]	1537.54	1530.37	1533.72	1534.74	1534.2	1533.97	3580.55	3450.97	3703.62	4001.85	4047.75	4373.19	119.29	112.27	118.17	132.54	131.44	140.9	3859.66	0.211031	0.0606844	3.47752	0.000506078	0.0196519
ENST00000379775.8	PFKFB3-203	protein_coding	PFKFB3	6-phosphofructo-2-kinase/fructose-2,6-biphosphatase 3 [Source:HGNC Symbol;Acc:HGNC:8874]	4304.54	4297.37	4300.72	4301.74	4301.2	4300.97	997.277	969.636	1018.74	459.319	637.514	756.389	11.86	11.26	11.59	5.42	7.38	8.69	806.478	-0.686795	0.197603	-3.47564	0.000509639	0.0197582
ENST00000242249.8	RAMP3-201	protein_coding	RAMP3	receptor activity modifying protein 3 [Source:HGNC Symbol;Acc:HGNC:9845]	1144.54	1137.37	1140.72	1141.74	1141.2	1140.97	879.943	881.549	733.095	597.507	630.715	481.375	39.42	38.58	31.45	26.62	27.55	20.87	700.697	-0.547658	0.157896	-3.46848	0.000523411	0.0202594
ENST00000342480.6	PODXL2-201	protein_coding	PODXL2	podocalyxin like 2 [Source:HGNC Symbol;Acc:HGNC:17936]	2007.54	2000.37	2003.72	2004.74	2004.2	2003.97	904.321	887.082	858.363	711.391	725.286	744.952	23.06	22.09	20.97	18.03	18.03	18.37	805.232	-0.279136	0.08052	-3.46666	0.000526967	0.0203642
ENST00000295802.8	RETSAT-201	protein_coding	RETSAT	retinol saturase [Source:HGNC Symbol;Acc:HGNC:25991]	2921.54	2914.37	2917.72	2918.74	2918.2	2917.97	493.532	543.67	569.144	650.297	765.818	805.515	8.64	9.3	9.55	11.32	13.07	13.65	637.996	0.468505	0.135219	3.46479	0.000530648	0.0204735
ENST00000309446.10	KLF7-201	protein_coding	KLF7	Kruppel like factor 7 [Source:HGNC Symbol;Acc:HGNC:6350]	8183.54	8176.37	8179.72	8180.74	8180.2	8179.97	181.636	227.658	213.934	128.79	135.068	130.156	1.14	1.39	1.28	0.8	0.83	0.79	169.54	-0.6609	0.190785	-3.4641	0.000532	0.0204821
ENST00000328300.10	COL4A5-201	protein_coding	COL4A5	collagen type IV alpha 5 chain [Source:HGNC Symbol;Acc:HGNC:2207]	6304.54	6297.37	6300.72	6301.74	6301.2	6300.97	458.954	311.1	207.251	97.6636	144.522	157.989	3.73	2.46	1.61	0.79	1.14	1.24	229.58	-1.28712	0.371591	-3.46381	0.000532579	0.0204821
ENST00000439602.6	RPS18-230	protein_coding	RPS18	ribosomal protein S18 [Source:HGNC Symbol;Acc:HGNC:10401]	434.61	427.44	430.79	431.81	431.26	431.04	36432.7	39851	41314.7	33611.9	34734.1	34857.7	4318.9	4613.62	4690.65	3960.89	4013.05	3995.89	36800.3	-0.188361	0.0544012	-3.46245	0.000535286	0.0205533
ENST00000373091.7	GRIK3-201	protein_coding	GRIK3	glutamate ionotropic receptor kainate type subunit 3 [Source:HGNC Symbol;Acc:HGNC:4581]	8922.54	8915.37	8918.72	8919.74	8919.2	8918.97	137.798	156.65	154.6	66.542	89.1451	93.3193	0.79	0.88	0.85	0.38	0.5	0.52	116.342	-0.848172	0.245154	-3.45975	0.000540674	0.020727
ENST00000553110.7	RPL36A-209	protein_coding	RPL36A	ribosomal protein L36a [Source:HGNC Symbol;Acc:HGNC:10359]	250.86	243.82	247.09	248.09	247.55	247.35	15093.6	15045.7	16106.3	13657.3	13519.2	14301.5	3117.43	3034.99	3186.07	2804.09	2721.52	2856.54	14620.6	-0.156794	0.0453557	-3.45699	0.000546253	0.0209075
ENST00000382533.8	SAP18-201	protein_coding	SAP18	Sin3A associated protein 18 [Source:HGNC Symbol;Acc:HGNC:10530]	2119.54	2112.37	2115.72	2116.74	2116.2	2115.97	2685.51	2720.79	2664.49	3016.22	2926.81	3028.91	64.87	64.19	61.64	72.42	68.89	70.74	2840.46	0.154116	0.0445867	3.45654	0.000547168	0.0209091
ENST00000280734.2	TMEM86A-201	protein_coding	TMEM86A	transmembrane protein 86A [Source:HGNC Symbol;Acc:HGNC:26890]	3416.54	3409.37	3412.72	3413.74	3413.2	3412.97	56.3367	43.9818	56.8298	86.9237	113.455	129.34	0.85	0.64	0.82	1.29	1.66	1.88	81.1445	1.06648	0.308585	3.45604	0.000548167	0.0209107
ENST00000449733.7	GSN-209	protein_coding	GSN	gelsolin [Source:HGNC Symbol;Acc:HGNC:4620]	2523.54	2516.37	2519.72	2520.74	2520.2	2519.97	140.344	181.636	53.4889	511.849	329.556	311.894	2.84	3.6	1.04	10.31	6.51	6.12	254.795	1.62225	0.469447	3.45566	0.000548952	0.0209107
ENST00000325110.10	HMGCS1-201	protein_coding	HMGCS1	3-hydroxy-3-methylglutaryl-CoA synthase 1 [Source:HGNC Symbol;Acc:HGNC:5007]	3327.54	3320.37	3323.72	3324.74	3324.2	3323.97	709.107	1028.53	701.182	1367.16	1299.33	1142.78	10.9	15.45	10.32	20.9	19.48	16.99	1041.35	0.644483	0.186582	3.45414	0.000552043	0.0209951
ENST00000479391.6	ERCC6L2-208	protein_coding	ERCC6L2	ERCC excision repair 6 like 2 [Source:HGNC Symbol;Acc:HGNC:26922]	2670.54	2663.37	2666.72	2667.74	2667.2	2666.97	122.475	152.291	162.137	87.9921	78.3373	79.4058	2.35	2.84	2.98	1.67	1.47	1.48	113.773	-0.829515	0.240359	-3.45115	0.0005582	0.0211957
ENST00000425368.6	CFB-271	protein_coding	CFB	complement factor B [Source:HGNC Symbol;Acc:HGNC:1037]	2683.54	2676.37	2679.72	2680.74	2680.2	2679.97	2027.56	2799.88	2363.52	2952.03	4046.53	3569.98	38.67	52.14	43.17	55.96	75.22	65.83	2959.92	0.555674	0.161119	3.44885	0.000562989	0.0213438
ENST00000513154.5	TRIM36-207	protein_coding	TRIM36	tripartite motif containing 36 [Source:HGNC Symbol;Acc:HGNC:16280]	4039.54	4032.37	4035.72	4036.74	4036.2	4035.97	99.2753	112.755	140.401	65.463	54.0265	59.7581	1.26	1.4	1.7	0.83	0.66	0.73	88.6131	-0.973836	0.282606	-3.44592	0.000569122	0.0215423
ENST00000534180.1	FTH1-210	protein_coding	FTH1	ferritin heavy chain 1 [Source:HGNC Symbol;Acc:HGNC:3976]	804.54	797.37	800.72	801.74	801.2	800.97	3487.64	3252.68	2925.25	3736.46	4050.18	4341.56	222.49	202.65	178.74	236.98	251.86	267.85	3632.3	0.327945	0.0951876	3.44525	0.000570533	0.0215617
ENST00000479872.5	UCK2-208	protein_coding	UCK2	uridine-cytidine kinase 2 [Source:HGNC Symbol;Acc:HGNC:12562]	4490.54	4483.37	4486.72	4487.74	4487.2	4486.97	1215.56	1257.1	1227.66	1088.21	998.143	1006.06	13.85	13.99	13.39	12.32	11.08	11.08	1132.12	-0.258258	0.0750145	-3.44277	0.000575782	0.0217258
ENST00000264832.7	ICAM1-201	protein_coding	ICAM1	intercellular adhesion molecule 1 [Source:HGNC Symbol;Acc:HGNC:5344]	3073.54	3066.37	3069.72	3070.74	3070.2	3069.97	548.997	636.121	569.977	714.691	890.079	801.421	9.14	10.35	9.09	11.84	14.45	12.91	693.548	0.45516	0.132348	3.43912	0.000583607	0.0219698
ENST00000340941.10	MCCC2-201	protein_coding	MCCC2	methylcrotonoyl-CoA carboxylase 2 [Source:HGNC Symbol;Acc:HGNC:6937]	3486.54	3479.37	3482.72	3483.74	3483.2	3482.97	5728.57	5928.38	6251.27	6644.86	6660.09	7057.22	84.06	84.96	87.85	96.93	95.24	100.15	6378.4	0.185621	0.0539767	3.4389	0.000584079	0.0219698
ENST00000418800.6	DDR1-232	protein_coding	DDR1	discoidin domain receptor tyrosine kinase 1 [Source:HGNC Symbol;Acc:HGNC:2730]	3409.54	3402.37	3405.72	3406.74	3406.2	3405.97	1553.28	1501.02	1348.04	1723.45	2128.63	1899.17	23.31	22	19.37	25.71	31.12	27.56	1692.27	0.385064	0.112042	3.43677	0.00058869	0.0221086
ENST00000379516.6	SNX2-201	protein_coding	SNX2	sorting nexin 2 [Source:HGNC Symbol;Acc:HGNC:11173]	1949.54	1942.37	1945.72	1946.74	1946.2	1945.97	2950.51	3142.2	3030.61	3431.38	3491.36	3348.2	77.49	80.6	76.24	89.57	89.37	85.04	3232.38	0.170758	0.0496979	3.43591	0.000590562	0.0221442
ENST00000407327.8	SLC44A2-202	protein_coding	SLC44A2	solute carrier family 44 member 2 [Source:HGNC Symbol;Acc:HGNC:17292]	3122.54	3115.37	3118.72	3119.74	3119.2	3118.97	3910.11	3910.27	4331.65	4664.82	4623.28	5036.09	64.07	62.57	67.98	75.98	73.83	79.8	4412.7	0.237508	0.0691363	3.43536	0.000591761	0.0221546
ENST00000332047.9	CEP63-201	protein_coding	CEP63	centrosomal protein 63 [Source:HGNC Symbol;Acc:HGNC:25815]	1877.54	1870.37	1873.72	1874.74	1874.2	1873.97	352.929	349.912	331.815	265.022	210.697	242.315	9.62	9.33	8.66	7.2	5.6	6.4	292.115	-0.522602	0.152212	-3.43339	0.000596083	0.0222816
ENST00000434651.6	HLA-DQB1-205	protein_coding	HLA-DQB1	major histocompatibility complex, class II, DQ beta 1 [Source:HGNC Symbol;Acc:HGNC:4944]	1463.54	1456.37	1459.72	1460.74	1460.2	1459.97	322.382	284.605	311.773	405.54	417.334	408.504	11.28	9.75	10.45	14.12	14.25	13.83	358.357	0.419439	0.122257	3.43079	0.000601836	0.0224109
ENST00000581733.1	TVP23B-209	protein_coding	TVP23B	trans-golgi network vesicle protein 23 homolog B [Source:HGNC Symbol;Acc:HGNC:20399]	1079.54	1072.37	1075.72	1076.74	1076.2	1075.97	340.849	288.256	296.755	435.511	482.15	404.423	16.19	13.39	13.49	20.56	22.32	18.56	374.657	0.509397	0.148488	3.43056	0.000602344	0.0224109
ENST00000636438.1	TJP2-212	protein_coding	TJP2	tight junction protein 2 [Source:HGNC Symbol;Acc:HGNC:11828]	4510.54	4503.37	4506.72	4507.74	4507.2	4506.97	1171.73	1206.36	1556.93	2081.97	1799.09	1717.43	13.29	13.36	16.91	23.47	19.88	18.83	1588.92	0.507806	0.147993	3.43128	0.000600748	0.0224109
ENST00000396033.6	ITGB1-202	protein_coding	ITGB1	integrin subunit beta 1 [Source:HGNC Symbol;Acc:HGNC:6153]	3605.54	3598.37	3601.72	3602.74	3602.2	3601.97	607.216	893.117	646.854	495.792	436.263	397.843	8.61	12.38	8.79	6.99	6.04	5.45	579.514	-0.690463	0.20136	-3.42899	0.000605834	0.0224711
ENST00000399448.5	PTPN6-202	protein_coding	PTPN6	protein tyrosine phosphatase, non-receptor type 6 [Source:HGNC Symbol;Acc:HGNC:9658]	1980.54	1973.37	1976.72	1977.74	1977.2	1976.97	772.05	733.61	736.338	885.211	904.918	912.771	19.95	18.53	18.24	22.73	22.79	22.81	824.15	0.269547	0.0785998	3.42936	0.000605005	0.0224711
ENST00000393203.2	PTGFRN-201	protein_coding	PTGFRN	prostaglandin F2 receptor inhibitor [Source:HGNC Symbol;Acc:HGNC:9601]	5999.54	5992.37	5995.72	5996.74	5996.2	5995.97	1843.82	1802.4	1934.63	1631.3	1618.11	1574.16	15.72	15.01	15.79	13.82	13.44	12.98	1734.07	-0.212069	0.0619314	-3.42426	0.00061647	0.0228303
ENST00000223500.8	CHMP5-201	protein_coding	CHMP5	charged multivesicular body protein 5 [Source:HGNC Symbol;Acc:HGNC:26942]	1298.54	1291.37	1294.72	1295.74	1295.2	1294.97	2637.2	3054.85	2794.35	3410.42	3723.56	3276.25	104.06	117.74	105.63	133.79	143.21	125.05	3149.44	0.294501	0.0860224	3.42354	0.000618106	0.0228557
ENST00000511912.5	ETFDH-206	protein_coding	ETFDH	electron transfer flavoprotein dehydrogenase [Source:HGNC Symbol;Acc:HGNC:3483]	3103.54	3096.37	3099.72	3100.74	3100.2	3099.97	258.407	270.687	274.959	169.552	171.533	202.197	4.26	4.36	4.35	2.78	2.75	3.22	224.556	-0.559666	0.163546	-3.42208	0.000621448	0.0229439
ENST00000340368.8	INSIG1-201	protein_coding	INSIG1	insulin induced gene 1 [Source:HGNC Symbol;Acc:HGNC:6083]	2831.54	2824.37	2827.72	2828.74	2828.2	2827.97	2109.95	1617.54	1907.18	2878.03	2347.42	2491.04	38.14	28.54	33.01	51.7	41.34	43.53	2225.19	0.453181	0.132504	3.42014	0.000625882	0.0230064
ENST00000400889.2	FAM72D-201	protein_coding	FAM72D	family with sequence similarity 72 member D [Source:HGNC Symbol;Acc:HGNC:33593]	2218.54	2211.37	2214.72	2215.74	2215.2	2214.97	548.759	513.423	570.839	442.085	388.982	406.037	12.66	11.56	12.61	10.14	8.74	9.06	478.354	-0.400863	0.117223	-3.41967	0.000626976	0.0230064
ENST00000474889.5	PTPRG-203	protein_coding	PTPRG	protein tyrosine phosphatase, receptor type G [Source:HGNC Symbol;Acc:HGNC:9671]	8842.54	8835.37	8838.72	8839.74	8839.2	8838.97	1202.59	1434.65	1496.7	993.837	1080.55	1068.26	6.95	8.1	8.29	5.71	6.09	5.97	1212.76	-0.395537	0.11565	-3.42012	0.000625925	0.0230064
ENST00000540746.6	LSM14A-202	protein_coding	LSM14A	LSM14A, mRNA processing body assembly factor [Source:HGNC Symbol;Acc:HGNC:24489]	1973.54	1966.37	1969.72	1970.74	1970.2	1969.97	528.994	583.506	522.374	809.029	646.949	789.977	13.72	14.8	12.99	20.88	16.37	19.82	646.805	0.461918	0.135075	3.41971	0.000626875	0.0230064
ENST00000222008.10	RABAC1-201	protein_coding	RABAC1	Rab acceptor 1 [Source:HGNC Symbol;Acc:HGNC:9794]	642.56	635.38	638.73	639.75	639.21	638.98	511.04	534.823	468.229	643.346	652.274	636.973	40.87	41.8	35.87	51.11	50.81	49.27	574.448	0.35368	0.103474	3.41805	0.000630704	0.0230726
ENST00000310775.11	FANCI-202	protein_coding	FANCI	Fanconi anemia complementation group I [Source:HGNC Symbol;Acc:HGNC:25568]	4564.54	4557.37	4560.72	4561.74	4561.2	4560.97	5048.33	4999.01	5299.24	4502.01	4334.29	3742.64	56.57	54.71	56.87	50.15	47.34	40.55	4654.25	-0.287868	0.0842162	-3.4182	0.00063037	0.0230726
ENST00000330622.9	FBXO21-201	protein_coding	FBXO21	F-box protein 21 [Source:HGNC Symbol;Acc:HGNC:13592]	2727.54	2720.37	2723.72	2724.74	2724.2	2723.97	250.321	265.091	300.872	398.113	376.83	370.014	4.7	4.85	5.4	7.42	6.88	6.71	326.874	0.48628	0.142508	3.41231	0.000644158	0.0235289
ENST00000636712.1	SERPINA1-220	protein_coding	SERPINA1	serpin family A member 1 [Source:HGNC Symbol;Acc:HGNC:8941]	1306.54	1299.37	1302.72	1303.74	1303.2	1302.97	333.897	378.46	332.68	258.545	251.209	221.037	13.1	14.48	12.51	10.06	9.58	8.39	295.971	-0.517796	0.151949	-3.40769	0.000655144	0.0238938
ENST00000374881.2	PSMB8-201	protein_coding	PSMB8	proteasome subunit beta 8 [Source:HGNC Symbol;Acc:HGNC:9545]	1172.54	1165.37	1168.72	1169.74	1169.2	1168.97	157.973	155.954	132.073	283.203	291.723	201.391	6.92	6.68	5.52	12.31	12.42	8.53	203.72	0.796541	0.23404	3.40344	0.000665424	0.0242053
ENST00000602866.5	PSMC3-212	protein_coding	PSMC3	proteasome 26S subunit, ATPase 3 [Source:HGNC Symbol;Acc:HGNC:9549]	1194.54	1187.37	1190.72	1191.74	1191.2	1190.97	4166.42	4120.11	3963.84	3657	3656	3736.37	178.8	172.66	162.91	156.01	152.91	155.03	3883.29	-0.147982	0.0434815	-3.40333	0.000665702	0.0242053
ENST00000448787.6	PLSCR1-202	protein_coding	PLSCR1	phospholipid scramblase 1 [Source:HGNC Symbol;Acc:HGNC:9092]	817.54	810.37	813.72	814.74	814.2	813.97	682.779	649.582	725.665	1011.35	989.926	807.236	42.89	39.83	43.66	63.12	60.55	49.02	811.089	0.445492	0.130943	3.40219	0.000668472	0.0242693
ENST00000372645.3	BEX3-204	protein_coding	BEX3	brain expressed X-linked 3 [Source:HGNC Symbol;Acc:HGNC:13388]	734.55	727.37	730.73	731.74	731.2	730.97	1236.6	1163.97	1137.03	1628.95	1439.63	1381.99	86.44	79.5	76.14	113.24	98.05	93.42	1331.36	0.330685	0.0973115	3.39821	0.000678284	0.0245883
ENST00000264718.7	GPN1-201	protein_coding	GPN1	GPN-loop GTPase 1 [Source:HGNC Symbol;Acc:HGNC:17030]	2317.54	2310.37	2313.72	2314.74	2314.2	2313.97	300.318	276.439	349.354	184.562	195.842	222.665	6.63	5.97	7.39	4.05	4.22	4.76	254.863	-0.61765	0.182238	-3.38925	0.000700843	0.0253678
ENST00000159111.8	KDM4B-201	protein_coding	KDM4B	lysine demethylase 4B [Source:HGNC Symbol;Acc:HGNC:29136]	5414.54	5407.37	5410.72	5411.74	5411.2	5410.97	202.172	236.729	179.675	101.955	116.158	137.524	1.91	2.19	1.62	0.96	1.08	1.26	162.369	-0.791232	0.233583	-3.38736	0.000705676	0.0255042
ENST00000227214.10	PLEKHB1-201	protein_coding	PLEKHB1	pleckstrin homology domain containing B1 [Source:HGNC Symbol;Acc:HGNC:19079]	1837.54	1830.37	1833.72	1834.74	1834.2	1833.97	354.702	393.95	326.802	467.809	492.976	489.542	9.89	10.71	8.72	12.96	13.38	13.2	420.963	0.434387	0.128294	3.38587	0.000709535	0.0255844
ENST00000242059.9	SCRN1-201	protein_coding	SCRN1	secernin 1 [Source:HGNC Symbol;Acc:HGNC:22192]	5078.54	5071.37	5074.72	5075.74	5075.2	5074.97	7709.94	8241.94	8438.93	8909.7	9383.11	9165.03	77.65	81.06	81.4	89.2	92.1	89.26	8641.44	0.170723	0.050425	3.38568	0.000710027	0.0255844
ENST00000396399.6	GLDN-202	protein_coding	GLDN	gliomedin [Source:HGNC Symbol;Acc:HGNC:29514]	4405.54	4398.37	4401.72	4402.74	4402.2	4401.97	173.52	164.609	172.157	120.196	87.7933	83.4974	2.01	1.87	1.91	1.39	1	0.93	133.629	-0.809928	0.239347	-3.38391	0.000714616	0.0257112
ENST00000471229.6	ARMCX3-203	protein_coding	ARMCX3	armadillo repeat containing, X-linked 3 [Source:HGNC Symbol;Acc:HGNC:24065]	1872.54	1865.37	1868.72	1869.74	1869.2	1868.97	842.558	977.501	942.791	1137.34	1150.73	1127.26	23.04	26.09	24.69	30.93	30.67	29.81	1029.7	0.306586	0.0907051	3.38003	0.000724777	0.0260377
ENST00000268758.13	PIGS-201	protein_coding	PIGS	phosphatidylinositol glycan anchor biosynthesis class S [Source:HGNC Symbol;Acc:HGNC:14937]	2218.54	2211.37	2214.72	2215.74	2215.2	2214.97	1499.7	1606.85	1512.76	1741.51	1831.46	1789.51	34.61	36.2	33.44	39.95	41.18	39.92	1663.63	0.215822	0.0639016	3.37742	0.000731702	0.026169
ENST00000358502.9	APOL2-202	protein_coding	APOL2	apolipoprotein L2 [Source:HGNC Symbol;Acc:HGNC:619]	2372.54	2365.37	2368.72	2369.74	2369.2	2368.97	913.499	1133.92	1040.54	1274.77	1465.44	1330.26	19.72	23.88	21.5	27.33	30.81	27.75	1193.07	0.398649	0.118012	3.37804	0.000730035	0.026169
ENST00000566228.5	SNX29-205	protein_coding	SNX29	sorting nexin 29 [Source:HGNC Symbol;Acc:HGNC:30542]	7992.54	7985.37	7988.72	7989.74	7989.2	7988.97	730.116	749.477	782.197	601.02	619.963	621.311	4.67	4.68	4.79	3.82	3.87	3.85	684.014	-0.296297	0.0877287	-3.37742	0.000731693	0.026169
ENST00000550536.5	RAB3IP-212	protein_coding	RAB3IP	RAB3A interacting protein [Source:HGNC Symbol;Acc:HGNC:16508]	9467.54	9460.37	9463.72	9464.74	9464.2	9463.97	307.815	285.119	330.927	228.605	198.551	167.811	1.66	1.5	1.71	1.23	1.04	0.88	253.138	-0.639944	0.189583	-3.37554	0.000736708	0.0263088
ENST00000304434.10	ELOVL5-201	protein_coding	ELOVL5	ELOVL fatty acid elongase 5 [Source:HGNC Symbol;Acc:HGNC:21308]	2648.54	2641.37	2644.72	2645.74	2645.2	2644.97	8347	8453.94	8853.19	9988.16	9727.33	9167.69	161.29	159.53	163.84	191.85	183.19	171.3	9089.55	0.170482	0.0505224	3.37438	0.000739829	0.026381
ENST00000373178.4	ADPRHL2-201	protein_coding	ADPRHL2	ADP-ribosylhydrolase like 2 [Source:HGNC Symbol;Acc:HGNC:21304]	1489.54	1482.37	1485.72	1486.74	1486.2	1485.97	722.488	708.093	682.053	819.67	877.889	902.965	24.85	23.78	22.47	28.02	29.43	30.03	785.526	0.300893	0.0892466	3.37147	0.000747676	0.0265425
ENST00000392650.7	SDK2-201	protein_coding	SDK2	sidekick cell adhesion molecule 2 [Source:HGNC Symbol;Acc:HGNC:19308]	10544.5	10537.4	10540.7	10541.7	10541.2	10541	954.798	902.652	770.489	607.471	705.058	601.663	4.63	4.27	3.58	2.93	3.33	2.82	757.022	-0.458989	0.136117	-3.37202	0.000746183	0.0265425
ENST00000467148.1	HELZ2-204	protein_coding	HELZ2	helicase with zinc finger 2 [Source:HGNC Symbol;Acc:HGNC:30021]	7885.54	7878.37	7881.72	7882.74	7882.2	7881.97	4205.3	3090.34	2863.04	4724.44	4761.15	4825.6	27.27	19.57	17.78	30.45	30.09	30.26	4078.31	0.494351	0.146619	3.37167	0.000747136	0.0265425
ENST00000498707.5	ADAMTS9-210	protein_coding	ADAMTS9	ADAM metallopeptidase with thrombospondin type 1 motif 9 [Source:HGNC Symbol;Acc:HGNC:13202]	7445.54	7438.37	7441.72	7442.74	7442.2	7441.97	42.9466	56.3536	88.5825	129.862	202.602	138.342	0.3	0.38	0.59	0.89	1.35	0.92	109.782	1.31892	0.391655	3.36756	0.000758362	0.0268821
ENST00000357085.4	TRIM38-201	protein_coding	TRIM38	tripartite motif containing 38 [Source:HGNC Symbol;Acc:HGNC:10059]	9234.54	9227.37	9230.72	9231.74	9231.2	9230.97	512.722	590.528	513.941	781.334	811.761	651.598	2.84	3.19	2.72	4.3	4.38	3.49	643.647	0.471957	0.140226	3.36568	0.000763545	0.0270259
ENST00000287598.10	BUB1B-201	protein_coding	BUB1B	BUB1 mitotic checkpoint serine/threonine kinase B [Source:HGNC Symbol;Acc:HGNC:1149]	3546.54	3539.37	3542.72	3543.74	3543.2	3542.97	1595.37	1645.3	1819.38	1447.67	1330.4	1241.83	23.01	23.17	25.13	20.75	18.71	17.32	1513.32	-0.33328	0.0991139	-3.3626	0.000772128	0.0272894
ENST00000392066.7	ACSL3-202	protein_coding	ACSL3	acyl-CoA synthetase long chain family member 3 [Source:HGNC Symbol;Acc:HGNC:3570]	2968.54	2961.37	2964.72	2965.74	2965.2	2964.97	1843.63	2087.79	1994.09	2256.73	2363.64	2467.3	31.79	35.15	32.93	38.67	39.7	41.13	2168.86	0.259626	0.0772869	3.35925	0.00078154	0.0275815
ENST00000262753.8	POF1B-201	protein_coding	POF1B	premature ovarian failure, 1B [Source:HGNC Symbol;Acc:HGNC:13711]	3762.54	3755.37	3758.72	3759.74	3759.2	3758.97	529.435	617.938	717.052	852.082	857.669	889.006	7.2	8.21	9.34	11.52	11.37	11.69	743.864	0.478907	0.142647	3.35729	0.000787116	0.0276968
ENST00000379704.7	BAG1-202	protein_coding	BAG1	BCL2 associated athanogene 1 [Source:HGNC Symbol;Acc:HGNC:937]	949.54	942.37	945.72	946.74	946.2	945.97	1339.61	1794.82	1697.01	2007.9	2425.57	2270.2	72.36	94.72	87.8	107.82	127.71	118.61	1922.52	0.472708	0.140786	3.35765	0.000786093	0.0276968
ENST00000252809.3	GDF15-201	protein_coding	GDF15	growth differentiation factor 15 [Source:HGNC Symbol;Acc:HGNC:30142]	1021.54	1014.37	1017.72	1018.74	1018.2	1017.97	803.793	1077.5	968.024	1116.63	1940.74	1900.96	40.36	52.82	46.52	55.72	94.95	92.29	1301.27	0.799551	0.238197	3.35668	0.000788841	0.0277168
ENST00000370321.7	RPL5-202	protein_coding	RPL5	ribosomal protein L5 [Source:HGNC Symbol;Acc:HGNC:10360]	864.54	857.37	860.72	861.74	861.2	860.97	13517	15303.2	15772.8	12711.6	12620.6	12922.2	802.31	887.09	896.65	750	730.11	741.75	13807.9	-0.221078	0.0660243	-3.34843	0.000812715	0.0285139
ENST00000544001.6	ITFG1-204	protein_coding	ITFG1	integrin alpha FG-GAP repeat containing 1 [Source:HGNC Symbol;Acc:HGNC:30697]	1670.54	1663.37	1666.72	1667.74	1667.2	1666.97	305.504	330.805	404.54	241.406	229.604	216.12	9.36	9.9	11.87	7.35	6.87	6.4	287.997	-0.601735	0.179895	-3.34492	0.000823076	0.0288353
ENST00000346049.9	PTK2B-201	protein_coding	PTK2B	protein tyrosine kinase 2 beta [Source:HGNC Symbol;Acc:HGNC:9612]	3968.54	3961.37	3964.72	3965.74	3965.2	3964.97	81.3866	93.588	57.6647	139.511	151.274	146.53	1.05	1.17	0.71	1.79	1.9	1.83	111.659	0.916914	0.274334	3.34233	0.000830796	0.0290633
ENST00000311124.8	SLC19A1-201	protein_coding	SLC19A1	solute carrier family 19 member 1 [Source:HGNC Symbol;Acc:HGNC:10937]	3632.54	3625.37	3628.72	3629.74	3629.2	3628.97	1236.8	1137.81	1234.37	929.343	914.396	1045.36	17.42	15.66	16.65	13.01	12.55	14.24	1083.01	-0.319176	0.0955245	-3.3413	0.000833867	0.0291283
ENST00000299167.12	PHKB-201	protein_coding	PHKB	phosphorylase kinase regulatory subunit beta [Source:HGNC Symbol;Acc:HGNC:8927]	5285.54	5278.37	5281.72	5282.74	5282.2	5281.97	974.167	928.897	969.413	744.804	651.024	808.775	9.42	8.77	8.98	7.16	6.14	7.57	846.18	-0.378283	0.11335	-3.33732	0.000845917	0.0294634
ENST00000315251.10	CHDH-201	protein_coding	CHDH	choline dehydrogenase [Source:HGNC Symbol;Acc:HGNC:24288]	7486.54	7479.37	7482.72	7483.74	7483.2	7482.97	598.57	587.203	591.664	474.374	463.283	488.7	4.09	3.92	3.87	3.22	3.09	3.23	533.966	-0.315602	0.0945624	-3.3375	0.000845371	0.0294634
ENST00000555085.1	TMED10-203	protein_coding	TMED10	transmembrane p24 trafficking protein 10 [Source:HGNC Symbol;Acc:HGNC:16998]	374.65	367.49	370.83	371.84	371.3	371.08	1816.32	1744.34	1790.02	2026.15	2005.21	2010.22	250.11	234.52	236.01	277.35	269.04	267.65	1898.71	0.174527	0.0523928	3.33112	0.000864973	0.0300835
ENST00000508628.6	RNF213-204	protein_coding	RNF213	ring finger protein 213 [Source:HGNC Symbol;Acc:HGNC:14539]	17551.5	17544.4	17547.7	17548.7	17548.2	17548	3800.9	3896.29	3508.94	4492.82	4268.19	4198.52	11.07	11.08	9.79	13.01	12.12	11.83	4027.61	0.210175	0.0631056	3.33052	0.00086683	0.0301045
ENST00000451491.2	TSSC4-207	protein_coding	TSSC4	tumor suppressing subtransferable candidate 4 [Source:HGNC Symbol;Acc:HGNC:12386]	1244.54	1237.37	1240.72	1241.74	1241.2	1240.97	207.988	170.614	191.419	298.231	255.259	289.805	8.55	6.88	7.55	12.19	10.25	11.55	235.553	0.564947	0.169817	3.3268	0.00087848	0.0304628
ENST00000525724.5	TCIRG1-205	protein_coding	TCIRG1	T-cell immune regulator 1, ATPase H+ transporting V0 subunit a3 [Source:HGNC Symbol;Acc:HGNC:11647]	1685.54	1678.37	1681.72	1682.74	1682.2	1681.97	205.46	147.9	146.269	276.814	326.848	252.14	6.24	4.4	4.25	8.35	9.69	7.41	225.905	0.771945	0.232067	3.3264	0.000879765	0.0304628
ENST00000610153.1	RNF146-213	protein_coding	RNF146	ring finger protein 146 [Source:HGNC Symbol;Acc:HGNC:21336]	1891.54	1884.37	1887.72	1888.74	1888.2	1887.97	214.441	164.795	150.445	301.504	294.435	263.599	5.8	4.37	3.9	8.12	7.77	6.9	231.536	0.696337	0.20936	3.32602	0.000880957	0.0304628
ENST00000308127.8	SSH3-201	protein_coding	SSH3	slingshot protein phosphatase 3 [Source:HGNC Symbol;Acc:HGNC:30581]	2692.54	2685.37	2688.72	2689.74	2689.2	2688.97	1517.1	1317.58	1367.3	1653.61	1688.31	1768.21	28.84	24.45	24.89	31.24	31.28	32.5	1552.02	0.282159	0.0848475	3.32548	0.000882656	0.0304774
ENST00000572550.1	TRIM25-206	protein_coding	TRIM25	tripartite motif containing 25 [Source:HGNC Symbol;Acc:HGNC:12932]	340.68	333.53	336.87	337.88	337.34	337.12	320.758	325.756	334.614	510.997	477.992	399.597	48.64	48.16	48.62	76.96	70.56	58.54	394.952	0.497986	0.149766	3.32508	0.000883917	0.0304774
ENST00000458113.6	NCOR1-210	protein_coding	NCOR1	nuclear receptor corepressor 1 [Source:HGNC Symbol;Acc:HGNC:7672]	3311.54	3304.37	3307.72	3308.74	3308.2	3307.97	33.9797	72.1777	61.0087	107.313	137.767	169.452	0.52	1.09	0.91	1.65	2.07	2.53	96.9496	1.31667	0.396154	3.32364	0.000888521	0.0305922
ENST00000380752.9	SLC7A1-201	protein_coding	SLC7A1	solute carrier family 7 member 1 [Source:HGNC Symbol;Acc:HGNC:11057]	7168.54	7161.37	7164.72	7165.74	7165.2	7164.97	4567.47	4328.04	4668.97	3873.32	3839.98	4147.81	32.58	30.15	31.9	27.46	26.7	28.61	4237.6	-0.193101	0.0581423	-3.32118	0.000896382	0.0308186
ENST00000207549.8	UNC13D-201	protein_coding	UNC13D	unc-13 homolog D [Source:HGNC Symbol;Acc:HGNC:23147]	4214.54	4207.37	4210.72	4211.74	4211.2	4210.97	921.236	836.608	844.909	1109.66	1041.36	1321.22	11.18	9.92	9.82	13.38	12.32	15.51	1012.5	0.41785	0.125922	3.31831	0.000905641	0.0308856
ENST00000306156.7	PRKCE-201	protein_coding	PRKCE	protein kinase C epsilon [Source:HGNC Symbol;Acc:HGNC:9401]	5471.54	5464.37	5467.72	5468.74	5468.2	5467.97	480.385	454.292	439.578	343.427	370.084	334.806	4.49	4.15	3.94	3.19	3.37	3.03	403.762	-0.39396	0.118729	-3.31814	0.000906206	0.0308856
ENST00000356346.7	PLEC-205	protein_coding	PLEC	plectin [Source:HGNC Symbol;Acc:HGNC:9069]	14504.5	14497.4	14500.7	14501.7	14501.2	14501	860.022	729.038	841.513	1074.36	1200.76	980.666	3.03	2.51	2.84	3.76	4.12	3.34	947.727	0.418301	0.125988	3.32016	0.000899672	0.0308856
ENST00000361420.7	IGSF1-201	protein_coding	IGSF1	immunoglobulin superfamily member 1 [Source:HGNC Symbol;Acc:HGNC:5948]	4199.54	4192.37	4195.72	4196.74	4196.2	4195.97	2435.45	2381.3	1938.86	3268.88	3544.14	2634.26	29.66	28.33	22.62	39.57	42.07	31.03	2700.48	0.483348	0.145684	3.31779	0.000907341	0.0308856
ENST00000389253.8	DNM2-203	protein_coding	DNM2	dynamin 2 [Source:HGNC Symbol;Acc:HGNC:2974]	3402.54	3395.37	3398.72	3399.74	3399.2	3398.97	618.806	532.294	579.999	353.06	393.041	212.02	9.31	7.81	8.35	5.27	5.75	3.09	448.203	-0.858355	0.258629	-3.31886	0.00090385	0.0308856
ENST00000397638.6	PRMT2-206	protein_coding	PRMT2	protein arginine methyltransferase 2 [Source:HGNC Symbol;Acc:HGNC:5186]	1952.54	1945.37	1948.72	1949.74	1949.2	1948.97	341.338	446.95	462.198	612.671	579.417	612.335	8.95	11.44	11.61	15.98	14.82	15.53	509.151	0.530331	0.159802	3.31867	0.000904462	0.0308856
ENST00000535572.5	WNK1-206	protein_coding	WNK1	WNK lysine deficient protein kinase 1 [Source:HGNC Symbol;Acc:HGNC:14540]	9707.54	9700.37	9703.72	9704.74	9704.2	9703.97	2815.1	2575.06	2882.24	3180.08	3140.34	3325.11	14.83	13.25	14.54	16.65	16.12	16.94	2986.32	0.221297	0.0666695	3.31931	0.000902406	0.0308856
ENST00000200453.5	PPP1R15A-201	protein_coding	PPP1R15A	protein phosphatase 1 regulatory subunit 15A [Source:HGNC Symbol;Acc:HGNC:14375]	2199.54	2192.37	2195.72	2196.74	2196.2	2195.97	646.168	695.106	663.612	776.866	880.612	848.913	15.05	15.8	14.78	17.97	19.98	19.11	751.879	0.322241	0.0971796	3.31593	0.000913389	0.0310278
ENST00000371835.8	BRD4-203	protein_coding	BRD4	bromodomain containing 4 [Source:HGNC Symbol;Acc:HGNC:13575]	4445.54	4438.37	4441.72	4442.74	4442.2	4441.97	861.347	894.07	906.747	706.152	725.308	761.3	9.92	10.05	9.99	8.08	8.13	8.47	809.154	-0.278154	0.0838897	-3.31571	0.000914105	0.0310278
ENST00000301244.11	SPINT2-201	protein_coding	SPINT2	serine peptidase inhibitor, Kunitz type 2 [Source:HGNC Symbol;Acc:HGNC:11247]	1623.54	1616.37	1619.72	1620.74	1620.2	1619.97	9512.05	7929.67	8934.21	10200.1	10677.9	10453.2	300.09	244.33	269.94	319.87	328.32	318.89	9617.86	0.247987	0.0748925	3.31124	0.000928844	0.0314836
ENST00000218439.8	MAGED2-201	protein_coding	MAGED2	MAGE family member D2 [Source:HGNC Symbol;Acc:HGNC:16353]	1779.54	1772.37	1775.72	1776.74	1776.2	1775.97	388.629	454.935	488.952	224.245	267.422	331.547	11.19	12.79	13.47	6.41	7.48	9.22	359.288	-0.691507	0.208935	-3.30967	0.000934046	0.0316153
ENST00000265295.8	SPDL1-201	protein_coding	SPDL1	spindle apparatus coiled-coil protein 1 [Source:HGNC Symbol;Acc:HGNC:26010]	2489.54	2482.37	2485.72	2486.74	2486.2	2485.97	1006.53	1077.43	1051.39	912.097	833.345	825.986	20.7	21.64	20.7	18.64	16.69	16.42	951.129	-0.285712	0.0863822	-3.30754	0.000941198	0.0318125
ENST00000450115.6	TP53BP1-210	protein_coding	TP53BP1	tumor protein p53 binding protein 1 [Source:HGNC Symbol;Acc:HGNC:11999]	6000.54	5993.37	5996.72	5997.74	5997.2	5996.97	505.461	388.887	647.663	925.116	1083.24	714.634	4.31	3.24	5.28	7.83	9	5.89	710.834	0.817562	0.247254	3.30657	0.000944472	0.0318783
ENST00000398238.8	NSF-201	protein_coding	NSF	N-ethylmaleimide sensitive factor, vesicle fusing ATPase [Source:HGNC Symbol;Acc:HGNC:8016]	3804.54	3797.37	3800.72	3801.74	3801.2	3800.97	3498.6	3913.94	4046.57	3053.12	3134.88	3349.73	47.04	51.4	52.11	40.81	41.08	43.56	3499.47	-0.26414	0.0799175	-3.30516	0.000949238	0.0319941
ENST00000466342.1	SQSTM1-206	protein_coding	SQSTM1	sequestosome 1 [Source:HGNC Symbol;Acc:HGNC:11280]	629.56	622.38	625.74	626.75	626.21	625.98	331.161	409.1	410.536	483.573	679.283	608.321	27	32.65	32.09	39.27	54.03	48.03	486.996	0.621584	0.188287	3.30125	0.000962545	0.0323971
ENST00000407364.7	METTL15-204	protein_coding	METTL15	methyltransferase like 15 [Source:HGNC Symbol;Acc:HGNC:26606]	4063.54	4056.37	4059.72	4060.74	4060.2	4059.97	372.955	475.822	409.502	258.633	303.899	197.283	4.69	5.85	4.94	3.24	3.73	2.4	336.349	-0.732502	0.221915	-3.30082	0.000964017	0.0324012
ENST00000454885.6	ARL6IP4-211	protein_coding	ARL6IP4	ADP ribosylation factor like GTPase 6 interacting protein 4 [Source:HGNC Symbol;Acc:HGNC:18076]	1139.54	1132.37	1135.72	1136.74	1136.2	1135.97	194.549	206.828	191.424	258.526	294.424	281.621	8.75	9.07	8.25	11.56	12.94	12.24	237.895	0.494013	0.149772	3.29844	0.000972237	0.0326318
ENST00000253110.15	C19orf66-201	protein_coding	C19orf66	chromosome 19 open reading frame 66 [Source:HGNC Symbol;Acc:HGNC:25649]	1938.54	1931.37	1934.72	1935.74	1935.2	1934.97	428.901	478.559	376.947	557.947	727.985	602.512	11.33	12.35	9.53	14.64	18.73	15.39	528.808	0.55593	0.168622	3.2969	0.000977572	0.032765
ENST00000467111.5	LGALS9-205	protein_coding	LGALS9	galectin 9 [Source:HGNC Symbol;Acc:HGNC:6570]	1333.54	1326.37	1329.72	1330.74	1330.2	1329.97	112.495	75.6876	122.038	187.742	243.106	173.554	4.32	2.83	4.49	7.17	9.08	6.46	152.437	0.953015	0.289246	3.29483	0.000984809	0.0329616
ENST00000547008.5	LETMD1-206	protein_coding	LETMD1	LETM1 domain containing 1 [Source:HGNC Symbol;Acc:HGNC:24241]	1486.54	1479.37	1482.72	1483.74	1483.2	1482.97	106.274	140.038	104.481	45.0604	68.8805	59.7611	3.65	4.71	3.44	1.56	2.34	1.99	87.4159	-1.01521	0.308225	-3.29374	0.000988653	0.0330441
ENST00000371429.3	NDC1-201	protein_coding	NDC1	NDC1 transmembrane nucleoporin [Source:HGNC Symbol;Acc:HGNC:25525]	4955.54	4948.37	4951.72	4952.74	4952.2	4951.97	1886.53	1941.31	2172.83	1711.75	1646.47	1585.63	19.47	19.57	21.48	17.56	16.56	15.83	1824.08	-0.280579	0.0852038	-3.29304	0.000991104	0.03308
ENST00000349780.8	CDK5RAP2-201	protein_coding	CDK5RAP2	CDK5 regulatory subunit associated protein 2 [Source:HGNC Symbol;Acc:HGNC:18672]	6049.54	6042.37	6045.72	6046.74	6046.2	6045.97	1586.17	1228.65	1429.87	823.161	1107.55	1024.06	13.41	10.15	11.57	6.92	9.12	8.37	1199.91	-0.523826	0.159095	-3.29254	0.000992868	0.0330929
ENST00000439211.6	DHFR-201	protein_coding	DHFR	dihydrofolate reductase [Source:HGNC Symbol;Acc:HGNC:2861]	3738.54	3731.37	3734.72	3735.74	3735.2	3734.97	3108.62	3397.55	3541.8	2893.21	2863.4	2858.57	42.53	45.4	46.42	39.35	38.19	37.83	3110.53	-0.221977	0.0674782	-3.28961	0.00100325	0.0333925
ENST00000617005.4	PLCB1-211	protein_coding	PLCB1	phospholipase C beta 1 [Source:HGNC Symbol;Acc:HGNC:15917]	6279.54	6272.37	6275.72	6276.74	6276.2	6275.97	450.901	634.6	765.493	276.892	45.923	186.64	3.67	5.05	5.97	2.24	0.37	1.47	393.408	-1.85855	0.565106	-3.28885	0.00100598	0.0334372
ENST00000339872.8	HMGB1-202	protein_coding	HMGB1	high mobility group box 1 [Source:HGNC Symbol;Acc:HGNC:4983]	2140.54	2133.37	2136.72	2137.74	2137.2	2136.97	8079.88	9149.65	10293.5	7828.68	7134.03	6789.68	193.25	213.71	235.77	186.13	166.27	157.04	8212.58	-0.339623	0.103318	-3.28717	0.001012	0.0335905
ENST00000252229.6	MICB-201	protein_coding	MICB	MHC class I polypeptide-related sequence B [Source:HGNC Symbol;Acc:HGNC:7091]	2267.54	2260.37	2263.72	2264.74	2264.2	2263.97	822.272	855.298	885.925	986.113	1139.93	1057.66	18.56	18.86	19.16	22.14	25.08	23.08	957.867	0.310958	0.0946165	3.28651	0.00101436	0.0336223
ENST00000531165.5	CELF1-214	protein_coding	CELF1	CUGBP Elav-like family member 1 [Source:HGNC Symbol;Acc:HGNC:2549]	3471.54	3464.37	3467.72	3468.74	3468.2	3467.97	506.144	483.791	634.32	311.209	414.652	319.257	7.46	6.96	8.96	4.56	5.96	4.55	444.895	-0.640879	0.195044	-3.28582	0.00101684	0.0336582
ENST00000369085.7	BAG3-201	protein_coding	BAG3	BCL2 associated athanogene 3 [Source:HGNC Symbol;Acc:HGNC:939]	2392.54	2385.37	2388.72	2389.74	2389.2	2388.97	5214.69	4960.98	5398.25	5736.5	5856.36	6325.48	111.57	103.64	110.61	121.99	122.11	130.86	5582.04	0.202482	0.0616643	3.28362	0.00102484	0.0338762
ENST00000605476.5	SRGAP2-214	protein_coding	SRGAP2	SLIT-ROBO Rho GTPase activating protein 2 [Source:HGNC Symbol;Acc:HGNC:19751]	2305.54	2298.37	2301.72	2302.74	2302.2	2301.97	148.37	138.785	122.859	74.0393	59.4279	88.4112	3.29	3.01	2.61	1.64	1.28	1.89	105.315	-0.872983	0.265892	-3.28323	0.00102625	0.0338762
ENST00000259874.5	IER3-201	protein_coding	IER3	immediate early response 3 [Source:HGNC Symbol;Acc:HGNC:5392]	1065.54	1058.37	1061.72	1062.74	1062.2	1061.97	7125.4	7751.6	7039.38	8231.73	9940.1	8547.74	342.91	364.29	324.45	393.76	466.18	397.77	8105.99	0.285667	0.0870429	3.28191	0.00103105	0.0339444
ENST00000340913.10	HNRNPA1-202	protein_coding	HNRNPA1	heterogeneous nuclear ribonucleoprotein A1 [Source:HGNC Symbol;Acc:HGNC:5031]	1663.54	1656.37	1659.72	1660.74	1660.2	1659.97	7949.29	8633.75	7667.89	6840.91	7109.61	7216.3	244.74	259.59	226.11	209.36	213.32	214.84	7569.62	-0.195693	0.0596282	-3.28189	0.00103115	0.0339444
ENST00000227378.7	HSPA8-201	protein_coding	HSPA8	heat shock protein family A (Hsp70) member 8 [Source:HGNC Symbol;Acc:HGNC:5241]	2007.54	2000.37	2003.72	2004.74	2004.2	2003.97	50315.8	51806.2	53034.6	54758.9	55209.5	56538.6	1283.21	1290.31	1295.4	1388.22	1372.29	1394.37	53610.6	0.10192	0.0310602	3.28136	0.00103308	0.0339615
ENST00000053867.7	GRN-201	protein_coding	GRN	granulin precursor [Source:HGNC Symbol;Acc:HGNC:4601]	2163.54	2156.37	2159.72	2160.74	2160.2	2159.97	8341.88	7209.67	7292.23	8632.39	9028.97	9337.23	197.38	166.59	165.25	203.04	208.21	213.65	8307.06	0.241041	0.0734833	3.28022	0.00103728	0.0340528
ENST00000621943.4	ELOVL1-216	protein_coding	ELOVL1	ELOVL fatty acid elongase 1 [Source:HGNC Symbol;Acc:HGNC:14418]	1446.54	1439.37	1442.72	1443.74	1443.2	1442.97	358.093	285.743	325.984	223.153	216.095	233.314	12.67	9.86	11.06	7.84	7.48	7.99	273.73	-0.528108	0.161027	-3.27963	0.00103945	0.0340774
ENST00000601538.5	SHANK2-218	protein_coding	SHANK2	SH3 and multiple ankyrin repeat domains 2 [Source:HGNC Symbol;Acc:HGNC:14295]	8883.54	8876.37	8879.72	8880.74	8880.2	8879.97	369.548	353.872	258.224	144.89	198.55	211.196	2.13	1.99	1.42	0.83	1.11	1.17	256.047	-0.821633	0.250792	-3.27615	0.00105233	0.0344526
ENST00000371489.5	MYOF-204	protein_coding	MYOF	myoferlin [Source:HGNC Symbol;Acc:HGNC:3656]	1340.54	1333.37	1336.72	1337.74	1337.2	1336.97	534.806	603.233	561.706	705.912	768.484	690.124	20.44	22.51	20.57	26.81	28.63	25.5	644.044	0.347928	0.106227	3.27532	0.00105544	0.0345074
ENST00000280614.3	NOCT-201	protein_coding	NOCT	nocturnin [Source:HGNC Symbol;Acc:HGNC:14254]	1773.54	1766.37	1769.72	1770.74	1770.2	1769.97	200.12	214.487	225.67	284.33	298.486	303.713	5.77	6.03	6.23	8.17	8.39	8.47	254.468	0.469672	0.143421	3.27478	0.00105746	0.0345264
ENST00000338983.7	MAP3K20-201	protein_coding	MAP3K20	mitogen-activated protein kinase kinase kinase 20 [Source:HGNC Symbol;Acc:HGNC:17797]	7000.54	6993.37	6996.72	6997.74	6997.2	6996.97	774.806	873.508	921.762	697.604	632.118	658.968	5.66	6.23	6.45	5.06	4.5	4.66	759.794	-0.369172	0.112857	-3.27115	0.00107112	0.0348301
ENST00000354546.9	ANXA6-201	protein_coding	ANXA6	annexin A6 [Source:HGNC Symbol;Acc:HGNC:544]	2414.54	2407.37	2410.72	2411.74	2411.2	2410.97	476.426	487.403	563.309	696.408	626.696	771.14	10.09	10.08	11.44	14.68	12.95	15.81	603.564	0.457242	0.139777	3.27123	0.00107081	0.0348301
ENST00000375068.5	MAGED2-206	protein_coding	MAGED2	MAGE family member D2 [Source:HGNC Symbol;Acc:HGNC:16353]	2010.54	2003.37	2006.72	2007.74	2007.2	2006.97	684.498	739.233	972.867	571.903	472.719	350.373	17.42	18.39	23.72	14.49	11.75	8.63	631.932	-0.782859	0.239316	-3.27124	0.00107079	0.0348301
ENST00000320805.8	NFATC2IP-201	protein_coding	NFATC2IP	nuclear factor of activated T-cells 2 interacting protein [Source:HGNC Symbol;Acc:HGNC:25906]	4390.54	4383.37	4386.72	4387.74	4387.2	4386.97	1766.51	1557.03	1565.29	1390.84	1175.08	1301.58	20.58	17.71	17.47	16.11	13.33	14.67	1459.39	-0.337134	0.103121	-3.2693	0.00107812	0.0350106
ENST00000264926.6	RAD18-201	protein_coding	RAD18	RAD18, E3 ubiquitin protein ligase [Source:HGNC Symbol;Acc:HGNC:18278]	5707.54	5700.37	5703.72	5704.74	5704.2	5703.97	989.423	1007.76	1074.71	890.768	796.898	788.309	8.86	8.82	9.22	7.93	6.95	6.83	924.643	-0.311861	0.0954184	-3.26836	0.00108173	0.0350803
ENST00000374078.5	ROMO1-204	protein_coding	ROMO1	reactive oxygen species modulator 1 [Source:HGNC Symbol;Acc:HGNC:16185]	319.7	312.57	315.9	316.91	316.37	316.15	292.216	270.134	240.939	360.972	384.815	366.032	47.23	42.71	37.31	58.03	60.58	57.24	319.185	0.468594	0.143474	3.26606	0.00109056	0.035319
ENST00000225296.7	DHX33-201	protein_coding	DHX33	DEAH-box helicase 33 [Source:HGNC Symbol;Acc:HGNC:16718]	5439.54	5432.37	5435.72	5436.74	5436.2	5435.97	1611.12	1670.63	1648.83	1425.22	1449.27	1453.01	15.15	15.34	14.84	13.33	13.28	13.21	1543.01	-0.187669	0.0574944	-3.26412	0.00109804	0.0353702
ENST00000274065.8	RPS3A-201	protein_coding	RPS3A	ribosomal protein S3A [Source:HGNC Symbol;Acc:HGNC:10421]	755.55	748.37	751.73	752.74	752.2	751.97	27428.8	31597.2	34322.9	25366.8	26151.1	25985.1	1864	2097.06	2233.97	1713.64	1732.09	1707.65	28475.3	-0.268394	0.0822254	-3.26413	0.00109802	0.0353702
ENST00000313654.13	LAMA3-202	protein_coding	LAMA3	laminin subunit alpha 3 [Source:HGNC Symbol;Acc:HGNC:6483]	10482.5	10475.4	10478.7	10479.7	10479.2	10479	588.806	658.114	623.411	435.748	510.559	485.423	2.87	3.14	2.91	2.11	2.43	2.29	550.344	-0.385856	0.118193	-3.26463	0.00109609	0.0353702
ENST00000370994.8	SERBP1-203	protein_coding	SERBP1	SERPINE1 mRNA binding protein 1 [Source:HGNC Symbol;Acc:HGNC:17860]	6497.54	6490.37	6493.72	6494.74	6494.2	6493.97	2363.7	2804.36	2937.45	2162.56	2157.03	2162.73	18.6	21.55	22.14	16.92	16.54	16.46	2431.3	-0.322279	0.0987258	-3.26438	0.00109702	0.0353702
ENST00000301887.8	BATF2-201	protein_coding	BATF2	basic leucine zipper ATF-like transcription factor 2 [Source:HGNC Symbol;Acc:HGNC:25163]	1963.54	1956.37	1959.72	1960.74	1960.2	1959.97	140.289	101.578	119.519	245.713	275.527	168.638	3.66	2.58	2.98	6.36	6.99	4.25	175.211	0.925816	0.283672	3.26369	0.00109973	0.035377
ENST00000231498.7	NUP155-201	protein_coding	NUP155	nucleoporin 155 [Source:HGNC Symbol;Acc:HGNC:8063]	7964.54	7957.37	7960.72	7961.74	7961.2	7960.97	1815.45	1825.8	1765.79	1575.53	1612.71	1583.98	11.65	11.45	10.86	10.05	10.09	9.83	1696.54	-0.18028	0.0552935	-3.26042	0.00111246	0.0357388
ENST00000564386.6	GCSH-203	protein_coding	GCSH	glycine cleavage system protein H [Source:HGNC Symbol;Acc:HGNC:4208]	796.54	789.37	792.72	793.74	793.2	792.97	282.528	313.512	364.509	205.911	230.937	212.862	18.19	19.75	22.49	13.22	14.49	13.25	268.377	-0.567124	0.174238	-3.25488	0.00113439	0.0363944
ENST00000534719.1	FTH1-211	protein_coding	FTH1	ferritin heavy chain 1 [Source:HGNC Symbol;Acc:HGNC:3976]	609.56	602.39	605.74	606.75	606.21	605.99	1122.37	1139.12	1163.91	1272.69	1597.6	1570.33	94.68	93.83	93.99	106.65	131.27	128.03	1311	0.374215	0.115009	3.2538	0.00113873	0.036485
ENST00000552918.5	SPATS2-222	protein_coding	SPATS2	spermatogenesis associated serine rich 2 [Source:HGNC Symbol;Acc:HGNC:18650]	2814.54	2807.37	2810.72	2811.74	2811.2	2810.97	761.721	663.264	931.864	555.86	467.324	564.844	13.86	11.78	16.22	10.05	8.27	9.94	657.479	-0.568968	0.175054	-3.25024	0.00115306	0.0368947
ENST00000375650.4	HSPA1B-201	protein_coding	HSPA1B	heat shock protein family A (Hsp70) member 1B [Source:HGNC Symbol;Acc:HGNC:5233]	2342.54	2335.37	2338.72	2339.74	2339.2	2338.97	9327.88	8783.83	9306.35	9817.23	10214.9	10688.7	203.83	187.45	194.76	213.23	217.53	225.85	9689.81	0.164106	0.0505076	3.24914	0.00115754	0.0369542
ENST00000634560.1	HIST1H4H-202	protein_coding	HIST1H4H	histone cluster 1 H4 family member h [Source:HGNC Symbol;Acc:HGNC:4788]	855.54	848.37	851.72	852.74	852.2	851.97	387.813	538.568	497.422	613.479	783.302	755.653	23.25	31.56	28.56	36.56	45.78	43.84	596.039	0.597112	0.183803	3.24865	0.00115953	0.0369542
ENST00000635491.1	HIST1H4H-204	protein_coding	HIST1H4H	histone cluster 1 H4 family member h [Source:HGNC Symbol;Acc:HGNC:4788]	855.54	848.37	851.72	852.74	852.2	851.97	387.813	538.568	497.422	613.479	783.302	755.653	23.25	31.56	28.56	36.56	45.78	43.84	596.039	0.597112	0.183803	3.24865	0.00115953	0.0369542
ENST00000543494.1	AP003419.2-201	protein_coding	AP003419.2		532.58	525.4	528.76	529.77	529.23	529	107.608	48.7828	117.069	199.395	236.323	203.053	10.42	4.6	10.83	19.1	22.26	18.98	152.039	1.21655	0.374621	3.24741	0.0011646	0.0370664
ENST00000333188.9	COPB2-201	protein_coding	COPB2	coatomer protein complex subunit beta 2 [Source:HGNC Symbol;Acc:HGNC:2232]	3181.54	3174.37	3177.72	3178.74	3178.2	3177.97	5236.23	5980.87	5701.41	6621.13	6300.8	6630.74	84.21	93.93	87.82	105.85	98.76	103.13	6078.53	0.209477	0.0645431	3.24553	0.00117231	0.0372536
ENST00000361309.5	CD47-202	protein_coding	CD47	CD47 molecule [Source:HGNC Symbol;Acc:HGNC:1682]	1106.54	1099.37	1102.72	1103.74	1103.2	1102.97	6835.36	7740.42	7605.21	8676.02	8658.46	8229.24	316.69	350.26	337.48	399.61	391.02	368.72	7957.45	0.204729	0.0630862	3.24522	0.00117359	0.0372536
ENST00000325722.7	KIAA0319L-201	protein_coding	KIAA0319L	KIAA0319 like [Source:HGNC Symbol;Acc:HGNC:30071]	4610.54	4603.37	4606.72	4607.74	4607.2	4606.97	1392.68	1342.76	1456.64	1594.75	1615.4	1658.49	15.45	14.55	15.48	17.58	17.47	17.79	1510.12	0.215279	0.0664166	3.24134	0.0011897	0.0377003
ENST00000382494.6	ABCC5-203	protein_coding	ABCC5	ATP binding cassette subfamily C member 5 [Source:HGNC Symbol;Acc:HGNC:56]	1744.54	1737.37	1740.72	1741.74	1741.2	1740.97	133.111	136.599	130.388	202.785	179.632	216.12	3.9	3.92	3.66	5.92	5.12	6.12	166.439	0.587192	0.181172	3.24107	0.0011908	0.0377003
ENST00000316448.9	CALR-201	protein_coding	CALR	calreticulin [Source:HGNC Symbol;Acc:HGNC:1455]	1724.54	1717.37	1720.72	1721.74	1721.2	1720.97	18597.7	17384.7	18512.6	20438.3	19524.5	19825.7	552.28	504.2	526.53	603.34	565.1	569.35	19047.2	0.133587	0.041276	3.23642	0.00121037	0.0382694
ENST00000358204.8	TES-201	protein_coding	TES	testin LIM domain protein [Source:HGNC Symbol;Acc:HGNC:14620]	2603.54	2596.37	2599.72	2600.74	2600.2	2599.97	486.309	593.392	568.317	427.081	394.388	399.485	9.57	11.39	10.71	8.36	7.56	7.59	478.162	-0.431272	0.133342	-3.23433	0.00121927	0.0384999
ENST00000324225.8	SIDT2-202	protein_coding	SIDT2	SID1 transmembrane family member 2 [Source:HGNC Symbol;Acc:HGNC:24272]	4227.54	4220.37	4223.72	4224.74	4224.2	4223.97	158.31	146.575	138.729	235.025	349.822	214.474	1.92	1.73	1.61	2.82	4.13	2.51	207.156	0.844445	0.261134	3.23376	0.00122173	0.038527
ENST00000371663.10	RABL6-203	protein_coding	RABL6	RAB, member RAS oncogene family like 6 [Source:HGNC Symbol;Acc:HGNC:24703]	2899.54	2892.37	2895.72	2896.74	2896.2	2895.97	135.899	148.89	86.9179	68.6781	51.3246	47.4796	2.41	2.57	1.47	1.2	0.88	0.82	89.8649	-1.14888	0.355331	-3.23327	0.00122382	0.0385424
ENST00000328453.9	GATS-201	protein_coding	GATS	GATS, stromal antigen 3 opposite strand [Source:HGNC Symbol;Acc:HGNC:29954]	3347.54	3340.37	3343.72	3344.74	3344.2	3343.97	102.835	128.565	128.703	197.456	202.598	173.545	1.57	1.91	1.89	3	3.02	2.56	155.617	0.669673	0.20715	3.23279	0.00122587	0.0385561
ENST00000256997.7	ACP2-201	protein_coding	ACP2	acid phosphatase 2, lysosomal [Source:HGNC Symbol;Acc:HGNC:123]	2024.54	2017.37	2020.72	2021.74	2021.2	2020.97	998.163	973.969	1025.52	1170.63	1146.68	1263.96	25.23	24.05	24.84	29.43	28.26	30.91	1096.49	0.258168	0.079899	3.23118	0.0012328	0.0386666
ENST00000405375.5	CDKN1A-203	protein_coding	CDKN1A	cyclin dependent kinase inhibitor 1A [Source:HGNC Symbol;Acc:HGNC:1784]	2088.54	2081.37	2084.72	2085.74	2085.2	2084.97	143.879	171.535	127.876	200.651	278.229	271.784	3.52	4.11	3	4.88	6.65	6.44	198.992	0.763105	0.236193	3.23085	0.00123421	0.0386666
ENST00000539560.5	ELP2-210	protein_coding	ELP2	elongator acetyltransferase complex subunit 2 [Source:HGNC Symbol;Acc:HGNC:18248]	2363.54	2356.37	2359.72	2360.74	2360.2	2359.97	1407.78	1315.58	1273.72	1559.13	1724.76	1551.29	30.49	27.83	26.41	33.56	36.4	32.49	1472.04	0.272927	0.0844658	3.23121	0.00123266	0.0386666
ENST00000333047.9	MAD2L1-202	protein_coding	MAD2L1	mitotic arrest deficient 2 like 1 [Source:HGNC Symbol;Acc:HGNC:6763]	1098.54	1091.37	1094.72	1095.74	1095.2	1094.97	925.34	1079.48	1092.55	787.36	852.205	794.926	43.18	49.2	48.85	36.53	38.74	35.88	921.977	-0.348303	0.108013	-3.22464	0.00126133	0.0393439
ENST00000433892.6	CD44-209	protein_coding	CD44	CD44 molecule (Indian blood group) [Source:HGNC Symbol;Acc:HGNC:1681]	2113.54	2106.37	2109.72	2110.74	2110.2	2109.97	738.176	738.037	744.688	494.656	625.341	572.219	17.88	17.47	17.28	11.92	14.75	13.4	652.186	-0.394226	0.122264	-3.2244	0.00126239	0.0393439
ENST00000497815.5	CUX1-210	protein_coding	CUX1	cut like homeobox 1 [Source:HGNC Symbol;Acc:HGNC:2557]	768.55	761.37	764.73	765.74	765.2	764.97	132.775	189.046	208.173	52.5489	44.5667	104.795	8.84	12.35	13.34	3.5	2.89	6.76	121.984	-1.37994	0.427924	-3.22474	0.00126088	0.0393439
ENST00000512031.5	UIMC1-213	protein_coding	UIMC1	ubiquitin interaction motif containing 1 [Source:HGNC Symbol;Acc:HGNC:30298]	2288.54	2281.37	2284.72	2285.74	2285.2	2284.97	57.2024	60.9306	47.6393	129.837	81.0381	144.078	1.28	1.33	1.01	2.89	1.78	3.11	86.7874	1.1086	0.343778	3.22475	0.00126085	0.0393439
ENST00000233190.10	NDUFS1-201	protein_coding	NDUFS1	NADH:ubiquinone oxidoreductase core subunit S1 [Source:HGNC Symbol;Acc:HGNC:7707]	11640.5	11633.4	11636.7	11637.7	11637.2	11637	597.774	638.934	630.094	505.513	461.935	511.618	2.63	2.74	2.65	2.21	1.97	2.17	557.645	-0.332088	0.103037	-3.22298	0.00126863	0.0394481
ENST00000373365.4	GLO1-201	protein_coding	GLO1	glyoxalase I [Source:HGNC Symbol;Acc:HGNC:4323]	1833.54	1826.37	1829.72	1830.74	1830.2	1829.97	5010.48	5642.88	5628.35	4723.15	4775.78	4401.79	139.92	153.91	150.54	131.14	129.99	118.89	5030.4	-0.228522	0.0709122	-3.22261	0.00127029	0.0394481
ENST00000557932.5	WASH3P-202	transcribed_unprocessed_pseudogene	WASH3P	WAS protein family homolog 3 pseudogene [Source:HGNC Symbol;Acc:HGNC:24362]	1500.54	1493.37	1496.72	1497.74	1497.2	1496.97	191.119	241.673	219.828	130.89	143.164	148.993	6.53	8.08	7.17	4.45	4.76	4.92	179.278	-0.621866	0.192975	-3.22252	0.00127066	0.0394481
ENST00000410022.6	NFU1-203	protein_coding	NFU1	NFU1 iron-sulfur cluster scaffold [Source:HGNC Symbol;Acc:HGNC:16287]	1288.54	1281.37	1284.72	1285.74	1285.2	1284.97	154.444	132.184	151.295	213.486	245.806	205.482	6.14	5.12	5.77	8.43	9.54	7.9	183.783	0.594674	0.184585	3.22168	0.00127442	0.0395135
ENST00000260810.9	TOPBP1-201	protein_coding	TOPBP1	topoisomerase (DNA) II binding protein 1 [Source:HGNC Symbol;Acc:HGNC:17008]	5199.54	5192.37	5195.72	5196.74	5196.2	5195.97	2807.07	2980.62	2934.98	2608.96	2604.09	2424.69	27.62	28.63	27.65	25.51	24.96	23.06	2726.74	-0.192633	0.0598186	-3.22029	0.00128059	0.0395516
ENST00000286639.6	BATF-201	protein_coding	BATF	basic leucine zipper ATF-like transcription factor [Source:HGNC Symbol;Acc:HGNC:958]	801.54	794.37	797.72	798.74	798.2	797.97	564.181	538.727	601.939	665.997	772.491	781.04	36.13	33.69	36.92	42.4	48.22	48.37	654.063	0.379491	0.11784	3.22038	0.00128021	0.0395516
ENST00000367667.5	RFWD2-203	protein_coding	RFWD2	ring finger and WD repeat domain 2 [Source:HGNC Symbol;Acc:HGNC:17440]	1855.54	1848.37	1851.72	1852.74	1852.2	1851.97	384.193	384.912	303.399	248.927	249.864	239.859	10.6	10.36	8.03	6.84	6.73	6.41	301.859	-0.537157	0.166771	-3.22093	0.00127777	0.0395516
ENST00000319540.8	SCD5-202	protein_coding	SCD5	stearoyl-CoA desaturase 5 [Source:HGNC Symbol;Acc:HGNC:21088]	2922.54	2915.37	2918.72	2919.74	2919.2	2918.97	1343.8	1254.28	1249.44	1125.68	1053.51	996.252	23.53	21.45	20.95	19.59	17.99	16.87	1170.49	-0.278408	0.0865099	-3.21822	0.00128987	0.0397499
ENST00000329542.8	UNC5A-201	protein_coding	UNC5A	unc-5 netrin receptor A [Source:HGNC Symbol;Acc:HGNC:12567]	3633.54	3626.37	3629.72	3630.74	3630.2	3629.97	136.826	145.469	145.417	84.7784	97.2474	89.2281	1.93	1.99	1.97	1.19	1.33	1.21	116.494	-0.660265	0.205171	-3.21812	0.00129032	0.0397499
ENST00000316519.10	AACS-201	protein_coding	AACS	acetoacetyl-CoA synthetase [Source:HGNC Symbol;Acc:HGNC:21298]	3137.54	3130.37	3133.72	3134.74	3134.2	3133.97	1976.97	1926.36	2049.24	2181.64	2324.47	2307.66	32.24	30.68	32.01	35.36	36.95	36.4	2127.72	0.193987	0.0602869	3.21773	0.00129209	0.0397534
ENST00000360655.8	NAV2-202	protein_coding	NAV2	neuron navigator 2 [Source:HGNC Symbol;Acc:HGNC:15997]	10488.5	10481.4	10484.7	10485.7	10485.2	10485	116.329	146.498	120.337	76.2022	55.3781	76.1288	0.57	0.7	0.56	0.37	0.26	0.36	98.4789	-0.870996	0.27077	-3.21674	0.00129657	0.03984
ENST00000489081.5	CMSS1-205	protein_coding	CMSS1	cms1 ribosomal small subunit homolog (yeast) [Source:HGNC Symbol;Acc:HGNC:28666]	877.54	870.37	873.72	874.74	874.2	873.97	740.04	814.55	902.037	652.102	636.098	581.27	43.28	46.5	50.5	37.89	36.25	32.87	721.016	-0.39604	0.123174	-3.21528	0.00130316	0.0399914
ENST00000393800.6	PPP6R3-203	protein_coding	PPP6R3	protein phosphatase 6 regulatory subunit 3 [Source:HGNC Symbol;Acc:HGNC:1173]	4914.54	4907.37	4910.72	4911.74	4911.2	4910.97	4762.36	4528.61	4932.33	4261.66	3594.13	4021.78	49.56	46.02	49.16	44.09	36.45	40.48	4350.15	-0.259544	0.0807476	-3.21426	0.0013078	0.0400824
ENST00000443124.5	EPB41L5-203	protein_coding	EPB41L5	erythrocyte membrane protein band 4.1 like 5 [Source:HGNC Symbol;Acc:HGNC:19819]	2693.54	2686.37	2689.72	2690.74	2690.2	2689.97	1533.19	1901.92	1957.34	2248.1	2316.36	2360.07	29.13	35.28	35.61	42.45	42.89	43.36	2052.83	0.361124	0.112389	3.21318	0.00131276	0.0401832
ENST00000532695.5	RSRC2-220	protein_coding	RSRC2	arginine and serine rich coiled-coil 2 [Source:HGNC Symbol;Acc:HGNC:30559]	1822.54	1815.37	1818.72	1819.74	1819.2	1818.97	866.638	918.856	900.169	743.556	772.553	720.397	24.36	25.2	24.21	20.77	21.17	19.56	820.362	-0.265723	0.0827594	-3.21079	0.0013237	0.0404663
ENST00000623550.1	B2M-213	protein_coding	B2M	beta-2-microglobulin [Source:HGNC Symbol;Acc:HGNC:914]	2150.54	2143.37	2146.72	2147.74	2147.2	2146.97	98.307	112.846	93.608	173.828	179.634	144.078	2.34	2.62	2.13	4.12	4.17	3.32	133.717	0.706088	0.220138	3.20748	0.00133904	0.0408832
ENST00000371602.8	ADNP-202	protein_coding	ADNP	activity dependent neuroprotector homeobox [Source:HGNC Symbol;Acc:HGNC:15766]	5936.54	5929.37	5932.72	5933.74	5933.2	5932.97	272.858	844.284	483.867	269.378	168.834	162.901	2.35	7.1	3.99	2.31	1.42	1.36	367.02	-1.41243	0.440416	-3.20705	0.00134106	0.0408929
ENST00000254090.8	FMO5-201	protein_coding	FMO5	flavin containing monooxygenase 5 [Source:HGNC Symbol;Acc:HGNC:3773]	2453.54	2446.37	2449.72	2450.74	2450.2	2449.97	57.2082	78.9755	81.0695	113.743	168.83	138.347	1.19	1.6	1.63	2.37	3.43	2.8	106.362	0.952229	0.297164	3.20439	0.00135349	0.0411154
ENST00000392238.2	FAM117B-201	protein_coding	FAM117B	family with sequence similarity 117 member B [Source:HGNC Symbol;Acc:HGNC:14440]	5584.54	5577.37	5580.72	5581.74	5581.2	5580.97	430.295	476.831	481.362	372.404	345.772	335.625	3.94	4.27	4.22	3.39	3.09	2.97	407.048	-0.398421	0.124325	-3.20469	0.00135209	0.0411154
ENST00000487273.6	ADAM9-209	protein_coding	ADAM9	ADAM metallopeptidase domain 9 [Source:HGNC Symbol;Acc:HGNC:216]	3660.54	3653.37	3656.72	3657.74	3657.2	3656.97	1894.11	2333.12	2355.91	1784.64	1676.17	1703.52	26.47	31.84	31.53	24.79	22.83	23.02	1957.91	-0.349786	0.109135	-3.20508	0.00135023	0.0411154
ENST00000226760.5	WFS1-201	protein_coding	WFS1	wolframin ER transmembrane glycoprotein [Source:HGNC Symbol;Acc:HGNC:12762]	3461.54	3454.37	3457.72	3458.74	3458.2	3457.97	1553.3	1587.83	1612.13	1736.33	1911.18	1889.35	22.96	22.92	22.82	25.52	27.53	27	1715.02	0.219858	0.0686572	3.20225	0.0013636	0.0413177
ENST00000432854.5	DBNL-204	protein_coding	DBNL	drebrin like [Source:HGNC Symbol;Acc:HGNC:2696]	9439.54	9432.37	9435.72	9436.74	9436.2	9435.97	263.969	283.992	208.919	399.254	355.23	366.728	1.43	1.5	1.08	2.15	1.87	1.92	313.015	0.570605	0.17817	3.20259	0.00136197	0.0413177
ENST00000525900.5	FDFT1-209	protein_coding	FDFT1	farnesyl-diphosphate farnesyltransferase 1 [Source:HGNC Symbol;Acc:HGNC:3629]	1417.54	1410.37	1413.72	1414.74	1414.2	1413.97	769.729	695.759	964.583	1225.19	1125.04	1070.79	27.83	24.55	33.4	44.02	39.64	37.43	975.182	0.491603	0.153663	3.19923	0.00137796	0.0417003
ENST00000547997.5	VEZT-214	protein_coding	VEZT	vezatin, adherens junctions transmembrane protein [Source:HGNC Symbol;Acc:HGNC:18258]	2823.54	2816.37	2819.72	2820.74	2820.2	2819.97	943.215	1034.37	1118.24	1360.68	1234.49	1273.76	17.1	18.31	19.41	24.52	21.81	22.33	1160.79	0.321757	0.100634	3.19731	0.00138714	0.041925
ENST00000541774.5	ERBB2-204	protein_coding	ERBB2	erb-b2 receptor tyrosine kinase 2 [Source:HGNC Symbol;Acc:HGNC:3430]	4162.54	4155.37	4158.72	4159.74	4159.2	4158.97	1344.28	1399.25	1271.96	1632.29	1554.61	1533.24	16.52	16.8	14.97	19.93	18.62	18.22	1455.94	0.234208	0.0732986	3.19526	0.00139704	0.0421713
ENST00000291270.8	DMPK-201	protein_coding	DMPK	DM1 protein kinase [Source:HGNC Symbol;Acc:HGNC:2933]	2608.54	2601.37	2604.72	2605.74	2605.2	2604.97	531.902	437.71	448.804	596.626	633.451	687.638	10.43	8.4	8.44	11.63	12.12	13.04	556.022	0.435325	0.136298	3.19391	0.0014036	0.042316
ENST00000380708.5	WRB-202	protein_coding	WRB	tryptophan rich basic protein [Source:HGNC Symbol;Acc:HGNC:12790]	1285.54	1278.37	1281.72	1282.74	1282.2	1281.97	1506.93	1517.3	1568.12	1376.39	1250.64	1196.06	60.08	59.06	59.86	54.53	48.57	46.1	1402.57	-0.265556	0.0831543	-3.19354	0.0014054	0.0423173
ENST00000522677.7	MYBL1-204	protein_coding	MYBL1	MYB proto-oncogene like 1 [Source:HGNC Symbol;Acc:HGNC:7547]	5013.54	5006.37	5009.72	5010.74	5010.2	5009.97	796.123	833.108	794.754	695.432	534.865	550.099	8.12	8.3	7.77	7.05	5.32	5.43	700.73	-0.444413	0.139443	-3.18705	0.00143731	0.0431696
ENST00000560141.2	TRIM69-207	protein_coding	TRIM69	tripartite motif containing 69 [Source:HGNC Symbol;Acc:HGNC:17857]	3011.54	3004.37	3007.72	3008.74	3008.2	3007.97	303.104	322.58	291.675	461.435	447.065	372.468	5.16	5.36	4.75	7.8	7.4	6.12	366.388	0.479867	0.150563	3.18714	0.00143685	0.0431696
ENST00000435030.5	KIF5C-201	protein_coding	KIF5C	kinesin family member 5C [Source:HGNC Symbol;Acc:HGNC:6325]	6752.54	6745.37	6748.72	6749.74	6749.2	6748.97	120.782	185.976	162.959	240.404	301.201	254.583	0.91	1.38	1.18	1.81	2.23	1.86	210.984	0.762136	0.239171	3.18658	0.00143967	0.0431845
ENST00000486652.5	WDR26-208	protein_coding	WDR26	WD repeat domain 26 [Source:HGNC Symbol;Acc:HGNC:21208]	2688.54	2681.37	2684.72	2685.74	2685.2	2684.97	89.3988	54.1474	61.0103	127.696	128.311	136.709	1.69	1.01	1.11	2.42	2.38	2.51	99.5454	0.937671	0.294289	3.18623	0.0014414	0.0431845
ENST00000547649.5	MYL6-207	protein_coding	MYL6	myosin light chain 6 [Source:HGNC Symbol;Acc:HGNC:7587]	476.59	469.42	472.77	473.79	473.24	473.02	23207	23180.7	23091.5	24478.9	24781.1	26399	2506.88	2445.56	2389.1	2628.7	2608.97	2757.75	24189.7	0.123234	0.0386873	3.18538	0.00144563	0.0432571
ENST00000346213.8	RAB5C-201	protein_coding	RAB5C	RAB5C, member RAS oncogene family [Source:HGNC Symbol;Acc:HGNC:9785]	1492.54	1485.37	1488.72	1489.74	1489.2	1488.97	3724.09	3577.71	3596.66	3926.69	3988.32	4073.58	127.81	119.92	118.24	133.99	133.44	135.2	3814.51	0.137757	0.0432772	3.18314	0.00145688	0.0435394
ENST00000318562.12	EPS8L2-201	protein_coding	EPS8L2	EPS8 like 2 [Source:HGNC Symbol;Acc:HGNC:21296]	2969.54	2962.37	2965.72	2966.74	2966.2	2965.97	925.39	1025.28	848.283	1125.68	1318.23	1180.44	15.94	17.26	14	19.28	22.14	19.67	1070.55	0.373056	0.117241	3.18195	0.00146285	0.0436092
ENST00000355674.9	RSL1D1-201	protein_coding	RSL1D1	ribosomal L1 domain containing 1 [Source:HGNC Symbol;Acc:HGNC:24534]	1144.54	1137.37	1140.72	1141.74	1141.2	1140.97	1378.81	1253.38	1465.35	939.706	1154.74	1070.81	61.75	54.84	62.86	41.86	50.4	46.38	1210.47	-0.374264	0.11761	-3.18225	0.00146138	0.0436092
ENST00000395068.8	GRINA-202	protein_coding	GRINA	glutamate ionotropic receptor NMDA type subunit associated protein 1 [Source:HGNC Symbol;Acc:HGNC:4589]	1635.54	1628.37	1631.72	1632.74	1632.2	1631.97	7487.2	6440.28	6191.84	7805.41	8034.77	8369.77	234.48	196.98	185.72	242.99	245.22	253.47	7388.21	0.267075	0.0839602	3.18097	0.00146782	0.0437033
ENST00000264052.9	SP100-201	protein_coding	SP100	SP100 nuclear antigen [Source:HGNC Symbol;Acc:HGNC:11206]	3703.54	3696.37	3699.72	3700.74	3700.2	3699.97	382.762	420.61	361.034	564.476	515.952	481.34	5.29	5.68	4.77	7.75	6.95	6.43	454.362	0.42452	0.133492	3.18011	0.00147217	0.0437783
ENST00000537739.5	HDGF-210	protein_coding	HDGF	heparin binding growth factor [Source:HGNC Symbol;Acc:HGNC:4856]	1894.54	1887.37	1890.72	1891.74	1891.2	1890.97	4446.98	4812.9	4760.75	3642.72	4047.81	4201.21	120.19	127.02	123.22	97.86	106.64	109.8	4318.73	-0.237146	0.0746044	-3.17872	0.00147927	0.043935
ENST00000360595.7	MEF2D-202	protein_coding	MEF2D	myocyte enhancer factor 2D [Source:HGNC Symbol;Acc:HGNC:6997]	3015.54	3008.37	3011.72	3012.74	3012.2	3011.97	111.764	73.3136	91.0962	153.454	155.325	172.727	1.89	1.22	1.48	2.58	2.58	2.83	126.28	0.798928	0.251439	3.17742	0.00148589	0.0440772
ENST00000265748.6	ANLN-201	protein_coding	ANLN	anillin actin binding protein [Source:HGNC Symbol;Acc:HGNC:14082]	4608.54	4601.37	4604.72	4605.74	4605.2	4604.97	2902.54	3316.87	3698.01	2645.4	2577.07	2695.65	32.21	35.95	39.31	29.19	27.87	28.93	2972.59	-0.32464	0.102208	-3.17627	0.00149184	0.0441991
ENST00000335999.6	NCKAP5L-201	protein_coding	NCKAP5L	NCK associated protein 5 like [Source:HGNC Symbol;Acc:HGNC:29321]	4721.54	4714.37	4717.72	4718.74	4718.2	4717.97	693.224	574.973	618.424	765.184	823.908	870.172	7.51	6.08	6.41	8.24	8.7	9.12	724.314	0.381912	0.120278	3.17524	0.00149713	0.0443011
ENST00000321442.9	SFXN1-201	protein_coding	SFXN1	sideroflexin 1 [Source:HGNC Symbol;Acc:HGNC:16085]	4052.54	4045.37	4048.72	4049.74	4049.2	4048.97	3524.73	3647.61	3902.81	4278.71	4165.44	4130.67	44.49	44.97	47.18	53.69	51.25	50.42	3941.66	0.182776	0.0575866	3.17393	0.00150391	0.0444467
ENST00000221957.8	PLIN3-201	protein_coding	PLIN3	perilipin 3 [Source:HGNC Symbol;Acc:HGNC:16893]	2154.54	2147.37	2150.72	2151.74	2151.2	2150.97	1525.55	1533.58	1564.59	1730.77	1774.73	1724.84	36.24	35.58	35.61	40.88	41.11	39.64	1642.34	0.176633	0.0556601	3.17342	0.00150656	0.0444704
ENST00000248929.13	SGSM3-201	protein_coding	SGSM3	small G protein signaling modulator 3 [Source:HGNC Symbol;Acc:HGNC:25228]	2790.54	2783.37	2786.72	2787.74	2787.2	2786.97	536.418	465.87	457.993	611.659	632.102	636.882	9.84	8.34	8.05	11.16	11.3	11.29	556.821	0.364512	0.115041	3.16854	0.00153205	0.0451673
ENST00000378549.5	ITM2B-201	protein_coding	ITM2B	integral membrane protein 2B [Source:HGNC Symbol;Acc:HGNC:6174]	626.56	619.38	622.74	623.75	623.21	622.98	1305.91	1307.8	1382.11	1562.22	1712.38	1509.75	107.1	104.76	108.57	127.34	136.93	119.76	1463.36	0.257188	0.0811952	3.16752	0.00153744	0.0452706
ENST00000541584.5	NUMA1-220	protein_coding	NUMA1	nuclear mitotic apparatus protein 1 [Source:HGNC Symbol;Acc:HGNC:8059]	3378.54	3371.37	3374.72	3375.74	3375.2	3374.97	189.575	182.696	147.925	312.281	225.559	352.002	2.88	2.7	2.14	4.7	3.32	5.15	235.006	0.780092	0.246364	3.16642	0.0015433	0.0453319
ENST00000586527.1	UNK-202	protein_coding	UNK	unkempt family zinc finger [Source:HGNC Symbol;Acc:HGNC:29369]	1133.54	1126.37	1129.72	1130.74	1130.2	1129.97	1052.15	1115.53	1167.77	951.501	930.54	874.334	47.58	49.27	50.57	42.76	41.01	38.26	1015.31	-0.276794	0.0874127	-3.16652	0.00154273	0.0453319
ENST00000484378.1	HLA-C-207	protein_coding	HLA-C	major histocompatibility complex, class I, C [Source:HGNC Symbol;Acc:HGNC:4933]	683.55	676.38	679.73	680.75	680.2	679.98	202.169	193.691	127.086	299.173	307.912	276.727	15.18	14.22	9.13	22.34	22.59	20.12	234.46	0.758668	0.239665	3.16553	0.00154799	0.0454139
ENST00000318008.10	LASP1-201	protein_coding	LASP1	LIM and SH3 protein 1 [Source:HGNC Symbol;Acc:HGNC:6513]	3930.54	3923.37	3926.72	3927.74	3927.2	3926.97	4656.88	4857.6	4893.15	5146.87	5582.29	5847.29	60.61	61.74	60.99	66.59	70.81	73.59	5164.01	0.202715	0.0640472	3.16508	0.00155038	0.0454286
ENST00000299977.8	SLFN5-201	protein_coding	SLFN5	schlafen family member 5 [Source:HGNC Symbol;Acc:HGNC:28286]	10412.5	10405.4	10408.7	10409.7	10409.2	10409	967.322	1155.08	1293.62	1471.45	1480.35	1594.61	4.75	5.54	6.09	7.18	7.08	7.57	1327.07	0.412761	0.130448	3.16418	0.00155521	0.0455147
ENST00000372733.3	SDC4-201	protein_coding	SDC4	syndecan 4 [Source:HGNC Symbol;Acc:HGNC:10661]	2434.54	2427.37	2430.72	2431.74	2431.2	2430.97	2847.86	3051.87	3160.88	3321.09	3666.98	3592.92	59.87	62.66	63.65	69.41	75.14	73.05	3273.6	0.223555	0.0707034	3.16187	0.00156758	0.0458206
ENST00000393106.6	STEAP3-201	protein_coding	STEAP3	STEAP3 metalloreductase [Source:HGNC Symbol;Acc:HGNC:24592]	3736.54	3729.37	3732.72	3733.74	3733.2	3732.97	301.382	262.738	335.961	445.357	460.575	387.201	4.13	3.52	4.41	6.06	6.14	5.12	365.536	0.517177	0.163626	3.16073	0.00157374	0.0459448
ENST00000372624.3	TCEAL1-201	protein_coding	TCEAL1	transcription elongation factor A like 1 [Source:HGNC Symbol;Acc:HGNC:11616]	985.54	978.37	981.72	982.74	982.2	981.97	578.909	641.157	682.976	809.831	788.719	793.299	30.12	32.61	34.04	41.88	40.04	39.91	715.815	0.329752	0.104361	3.15973	0.00157916	0.046047
ENST00000371284.9	TTC4-202	protein_coding	TTC4	tetratricopeptide repeat domain 4 [Source:HGNC Symbol;Acc:HGNC:12394]	1945.54	1938.37	1941.72	1942.74	1942.2	1941.97	39.3161	60.9482	52.6555	169.53	110.751	85.1375	1.04	1.58	1.33	4.45	2.83	2.17	86.3898	1.25827	0.398752	3.15552	0.00160214	0.0466037
ENST00000453320.1	MBOAT7-208	protein_coding	MBOAT7	membrane bound O-acyltransferase domain containing 7 [Source:HGNC Symbol;Acc:HGNC:15505]	378.64	371.49	374.83	375.84	375.3	375.08	274.965	386.828	419.06	518.598	552.276	627.217	37.5	51.52	54.68	70.24	73.3	82.62	463.157	0.653124	0.206973	3.1556	0.00160168	0.0466037
ENST00000297440.10	DNAAF5-201	protein_coding	DNAAF5	dynein axonemal assembly factor 5 [Source:HGNC Symbol;Acc:HGNC:26013]	3231.54	3224.37	3227.72	3228.74	3228.2	3227.97	2037.84	2031.18	2035.86	1823.23	1537.04	1722.36	32.26	31.42	30.87	28.7	23.71	26.37	1864.58	-0.262776	0.083343	-3.15295	0.00161629	0.0469586
ENST00000478753.4	SEPHS2-201	protein_coding	SEPHS2	selenophosphate synthetase 2 [Source:HGNC Symbol;Acc:HGNC:19686]	2372.54	2365.37	2368.72	2369.74	2369.2	2368.97	6420.41	6433.45	6542.43	6985.5	6981.44	6829.75	138.51	135.55	135.18	149.81	146.79	142.49	6698.83	0.0998263	0.031673	3.15178	0.00162276	0.0470895
ENST00000304301.10	NUDT16L1-201	protein_coding	NUDT16L1	nudix hydrolase 16 like 1 [Source:HGNC Symbol;Acc:HGNC:28154]	1170.54	1163.37	1166.72	1167.74	1167.2	1166.97	1180.77	1138.02	1186.15	1292.65	1582.87	1538.27	51.7	48.68	49.73	56.28	67.57	65.14	1319.79	0.331908	0.105326	3.15125	0.00162571	0.0471181
ENST00000300417.10	LRSAM1-201	protein_coding	LRSAM1	leucine rich repeat and sterile alpha motif containing 1 [Source:HGNC Symbol;Acc:HGNC:25135]	2967.54	2960.37	2963.72	2964.74	2964.2	2963.97	524.834	527.868	493.926	386.316	425.455	338.087	9.05	8.9	8.16	6.62	7.14	5.63	449.414	-0.432528	0.137305	-3.15013	0.00163199	0.0472431
ENST00000520271.5	COX6C-204	protein_coding	COX6C	cytochrome c oxidase subunit 6C [Source:HGNC Symbol;Acc:HGNC:2285]	392.63	385.47	388.82	389.83	389.29	389.07	2198.65	2206.46	2073.47	2739.94	3016.61	2381.92	288.77	283.05	260.82	357.75	386.08	302.47	2436.17	0.327876	0.104119	3.14904	0.00163806	0.0473615
ENST00000314752.11	SULT1A1-201	protein_coding	SULT1A1	sulfotransferase family 1A member 1 [Source:HGNC Symbol;Acc:HGNC:11453]	983.54	976.37	979.72	980.74	980.2	979.97	596.744	468.15	453.088	690.769	771.161	676.228	31.13	23.83	22.63	35.78	39.19	34.1	609.357	0.492215	0.156458	3.14599	0.00165524	0.0477434
ENST00000389286.8	PRTG-201	protein_coding	PRTG	protogenin [Source:HGNC Symbol;Acc:HGNC:26373]	11788.5	11781.4	11784.7	11785.7	11785.2	11785	267.568	263.686	235.659	192.117	166.135	176.815	1.16	1.12	0.98	0.83	0.7	0.74	216.996	-0.516113	0.164038	-3.1463	0.00165349	0.0477434
ENST00000311191.10	LRCH1-201	protein_coding	LRCH1	leucine rich repeats and calponin homology domain containing 1 [Source:HGNC Symbol;Acc:HGNC:20309]	4531.54	4524.37	4527.72	4528.74	4528.2	4527.97	1145.8	1228.9	1287.83	1033.47	991.39	1032.26	12.93	13.55	13.92	11.6	10.9	11.26	1119.94	-0.259828	0.0826528	-3.1436	0.00166881	0.0480459
ENST00000448225.5	EIF4E3-205	protein_coding	EIF4E3	eukaryotic translation initiation factor 4E family member 3 [Source:HGNC Symbol;Acc:HGNC:31837]	6030.54	6023.37	6026.72	6027.74	6027.2	6026.97	165.506	137.519	170.481	104.102	81.0405	58.1203	1.4	1.14	1.38	0.88	0.67	0.47	119.462	-0.96871	0.308169	-3.14344	0.00166973	0.0480459
ENST00000466501.1	RPL9P9-202	transcribed_processed_pseudogene	RPL9P9	ribosomal protein L9 pseudogene 9 [Source:HGNC Symbol;Acc:HGNC:17251]	400.63	393.47	396.81	397.82	397.28	397.06	6698.19	7625.46	7941.68	6067.35	6445.15	6330.24	861.93	958.33	978.8	776.19	808.35	787.72	6851.34	-0.240834	0.0766282	-3.14289	0.00167287	0.0480785
ENST00000413697.5	REV1-203	protein_coding	REV1	REV1, DNA directed polymerase [Source:HGNC Symbol;Acc:HGNC:14060]	4548.54	4541.37	4544.72	4545.74	4545.2	4544.97	117.174	136.419	146.249	180.295	247.172	222.66	1.31	1.5	1.57	2.01	2.71	2.42	174.995	0.699281	0.222534	3.14235	0.00167598	0.0481101
ENST00000298569.8	KIAA1191-201	protein_coding	KIAA1191	KIAA1191 [Source:HGNC Symbol;Acc:HGNC:29209]	2812.54	2805.37	2808.72	2809.74	2809.2	2808.97	952.151	1069.35	915.984	1235.12	1284.47	1146.06	17.33	19	15.96	22.35	22.78	20.17	1100.52	0.319534	0.101775	3.1396	0.0016918	0.0485031
ENST00000374433.6	ZNF32-201	protein_coding	ZNF32	zinc finger protein 32 [Source:HGNC Symbol;Acc:HGNC:13095]	958.54	951.37	954.72	955.74	955.2	954.97	516.417	585.812	552.572	445.131	429.472	426.533	27.61	30.61	28.32	23.66	22.42	22.09	492.656	-0.345627	0.110098	-3.13927	0.00169371	0.0485031
ENST00000368811.7	S100A10-202	protein_coding	S100A10	S100 calcium binding protein A10 [Source:HGNC Symbol;Acc:HGNC:10487]	1023.54	1016.37	1019.72	1020.74	1020.2	1019.97	870.707	933.9	911.179	1051.2	1054.78	1088.02	43.61	45.69	43.72	52.38	51.52	52.7	984.964	0.235822	0.0751468	3.13815	0.0017002	0.048631
ENST00000265348.7	CUL7-201	protein_coding	CUL7	cullin 7 [Source:HGNC Symbol;Acc:HGNC:21024]	5075.54	5068.37	5071.72	5072.74	5072.2	5071.97	1438.4	1198.36	1398.97	1059.25	1046.77	1119.02	14.5	11.79	13.51	10.61	10.28	10.91	1210.13	-0.323797	0.103214	-3.13713	0.00170609	0.0487412
ENST00000371826.3	IFIT2-201	protein_coding	IFIT2	interferon induced protein with tetratricopeptide repeats 2 [Source:HGNC Symbol;Acc:HGNC:5409]	3310.54	3303.37	3306.72	3307.74	3307.2	3306.97	1156.21	1280.03	952.739	1477.69	1573.51	1454.67	17.87	19.32	14.1	22.7	23.71	21.74	1315.81	0.411781	0.131297	3.13625	0.00171124	0.0488304
ENST00000369301.3	NHLRC2-201	protein_coding	NHLRC2	NHL repeat containing 2 [Source:HGNC Symbol;Acc:HGNC:24731]	10872.5	10865.4	10868.7	10869.7	10869.2	10869	1427.29	1662.17	1677.19	1358.76	1218.32	1234.43	6.71	7.63	7.56	6.35	5.58	5.61	1429.69	-0.322139	0.102744	-3.13536	0.00171645	0.0489207
ENST00000518074.5	SPIDR-206	protein_coding	SPIDR	scaffolding protein involved in DNA repair [Source:HGNC Symbol;Acc:HGNC:28971]	2640.54	2633.37	2636.72	2637.74	2637.2	2636.97	151.08	249.31	226.491	100.869	132.363	85.9547	2.93	4.71	4.21	1.95	2.51	1.61	157.678	-0.979649	0.312523	-3.13464	0.00172062	0.0489816
ENST00000243346.9	NMI-201	protein_coding	NMI	N-myc and STAT interactor [Source:HGNC Symbol;Acc:HGNC:7854]	1444.54	1437.37	1440.72	1441.74	1441.2	1440.97	500.079	614.406	610.175	801.42	852.226	704.036	17.75	21.28	20.72	28.24	29.45	24.15	680.39	0.449668	0.143537	3.13277	0.00173168	0.0492135
ENST00000411486.6	HJURP-202	protein_coding	HJURP	Holliday junction recognition protein [Source:HGNC Symbol;Acc:HGNC:25444]	3008.54	3001.37	3004.72	3005.74	3005.2	3004.97	1118.53	1011.73	1177.56	933.601	861.715	884.101	19.03	16.81	19.19	15.78	14.29	14.54	997.874	-0.304957	0.0973721	-3.13187	0.00173697	0.0492135
ENST00000470056.5	GAPVD1-215	protein_coding	GAPVD1	GTPase activating protein and VPS9 domains 1 [Source:HGNC Symbol;Acc:HGNC:23375]	8744.54	8737.37	8740.72	8741.74	8741.2	8740.97	696.142	691.971	741.246	610.683	497.051	491.973	4.07	3.95	4.15	3.55	2.83	2.78	621.511	-0.413244	0.131932	-3.13225	0.0017347	0.0492135
ENST00000598325.5	PTOV1-210	protein_coding	PTOV1	prostate tumor overexpressed 1 [Source:HGNC Symbol;Acc:HGNC:9632]	1259.54	1252.37	1255.72	1256.74	1256.2	1255.97	919.464	993.141	1151.02	1278.75	1577.48	1297.57	37.41	39.45	44.85	51.73	62.56	51.06	1202.9	0.437383	0.139642	3.13218	0.00173515	0.0492135
ENST00000346169.6	EIF4G1-202	protein_coding	EIF4G1	eukaryotic translation initiation factor 4 gamma 1 [Source:HGNC Symbol;Acc:HGNC:3296]	5337.54	5330.37	5333.72	5334.74	5334.2	5333.97	4708.95	3957.93	4205.24	5009.73	4997.49	5284.87	45.12	37.04	38.59	47.71	46.67	48.97	4694.03	0.24843	0.0793486	3.13087	0.00174292	0.0492226
ENST00000369454.3	RAB39B-201	protein_coding	RAB39B	RAB39B, member RAS oncogene family [Source:HGNC Symbol;Acc:HGNC:16499]	3326.54	3319.37	3322.72	3323.74	3323.2	3322.97	230.706	259.387	259.078	331.596	352.521	326.625	3.55	3.9	3.82	5.07	5.28	4.86	293.319	0.430757	0.137588	3.13078	0.00174345	0.0492226
ENST00000550920.5	NACA-215	protein_coding	NACA	nascent polypeptide-associated complex alpha subunit [Source:HGNC Symbol;Acc:HGNC:7629]	573.57	566.39	569.75	570.76	570.22	569.99	8075.24	8712.93	9243.85	7756.74	7473.32	7548.07	723.93	762.86	793.7	691.27	652.98	654.4	8135.03	-0.192625	0.0615182	-3.13119	0.001741	0.0492226
ENST00000264027.8	SC5D-201	protein_coding	SC5D	sterol-C5-desaturase [Source:HGNC Symbol;Acc:HGNC:10547]	2277.54	2270.37	2273.72	2274.74	2274.2	2273.97	88.4842	150.071	150.44	328.347	276.88	194.832	1.99	3.3	3.24	7.33	6.08	4.23	198.176	1.03974	0.332165	3.13019	0.00174693	0.0492631
ENST00000586183.5	MGRN1-206	protein_coding	MGRN1	mahogunin ring finger 1 [Source:HGNC Symbol;Acc:HGNC:20254]	1662.54	1655.37	1658.72	1659.74	1659.2	1658.97	91.1144	67.7423	66.0304	118.021	147.216	135.894	2.82	2.02	1.94	3.62	4.42	4.06	104.336	0.831405	0.265686	3.12927	0.00175239	0.0493591
ENST00000509867.6	ANKRD17-203	protein_coding	ANKRD17	ankyrin repeat domain 17 [Source:HGNC Symbol;Acc:HGNC:23575]	7926.54	7919.37	7922.72	7923.74	7923.2	7922.97	30.4214	76.6385	61.0047	124.497	156.679	126.882	0.2	0.48	0.38	0.8	0.99	0.79	96.0204	1.28337	0.410373	3.12732	0.00176409	0.0496302
ENST00000367843.7	DCAF6-203	protein_coding	DCAF6	DDB1 and CUL4 associated factor 6 [Source:HGNC Symbol;Acc:HGNC:30002]	3123.54	3116.37	3119.72	3120.74	3120.2	3119.97	570.466	503.022	455.479	721.132	742.859	626.237	9.35	8.05	7.15	11.74	11.86	9.92	603.199	0.449232	0.143765	3.12476	0.0017795	0.0500053
ENST00000378165.8	NMT2-202	protein_coding	NMT2	N-myristoyltransferase 2 [Source:HGNC Symbol;Acc:HGNC:7858]	2728.54	2721.37	2724.72	2725.74	2725.2	2724.97	228.865	234.634	240.698	157.743	179.636	163.723	4.3	4.29	4.33	2.94	3.28	2.98	200.883	-0.494771	0.158424	-3.12307	0.00178974	0.0502342
ENST00000289153.6	PIK3CB-201	protein_coding	PIK3CB	phosphatidylinositol-4,5-bisphosphate 3-kinase catalytic subunit beta [Source:HGNC Symbol;Acc:HGNC:8976]	5740.54	5733.37	5736.72	5737.74	5737.2	5736.97	51.8867	52.9802	66.8557	98.7358	197.198	107.236	0.47	0.47	0.57	0.88	1.71	0.92	95.8155	1.22324	0.391784	3.12224	0.00179482	0.0502972
ENST00000308595.9	GRK2-201	protein_coding	GRK2	G protein-coupled receptor kinase 2 [Source:HGNC Symbol;Acc:HGNC:289]	3287.54	3280.37	3283.72	3284.74	3284.2	3283.97	3501.68	3023.59	3207.56	3669.01	3826.4	4013.64	54.5	45.95	47.81	56.77	58.04	60.41	3540.31	0.24169	0.0774148	3.12202	0.00179618	0.0502972
ENST00000521512.5	ANXA6-211	protein_coding	ANXA6	annexin A6 [Source:HGNC Symbol;Acc:HGNC:544]	1614.54	1607.37	1610.72	1611.74	1611.2	1610.97	174.179	173.884	203.943	232.82	325.496	319.27	5.52	5.39	6.2	7.35	10.06	9.8	238.265	0.667044	0.213808	3.11982	0.00180962	0.0506146
ENST00000407431.5	TFIP11-203	protein_coding	TFIP11	tuftelin interacting protein 11 [Source:HGNC Symbol;Acc:HGNC:17165]	2795.54	2788.37	2791.72	2792.74	2792.2	2791.97	61.6882	76.7047	61.01	134.136	101.298	117.062	1.13	1.38	1.07	2.44	1.82	2.07	91.9832	0.8303	0.266404	3.11669	0.00182894	0.0510953
ENST00000533161.5	RPS2-213	protein_coding	RPS2	ribosomal protein S2 [Source:HGNC Symbol;Acc:HGNC:10404]	1007.54	1000.37	1003.72	1004.74	1004.2	1003.97	3284.6	3028	3258.53	2811.39	2726.76	2887.47	167.2	150.51	158.86	142.26	135.25	142.15	2999.46	-0.183693	0.0589922	-3.11385	0.00184662	0.0515294
ENST00000319622.10	PKM-201	protein_coding	PKM	pyruvate kinase, muscle [Source:HGNC Symbol;Acc:HGNC:9021]	2538.54	2531.37	2534.72	2535.74	2535.2	2534.97	315.554	311.373	360.214	422.786	487.581	428.956	6.36	6.13	6.95	8.48	9.59	8.36	387.744	0.435637	0.139992	3.11187	0.00185906	0.0518162
ENST00000376423.8	GRIPAP1-201	protein_coding	GRIPAP1	GRIP1 associated protein 1 [Source:HGNC Symbol;Acc:HGNC:18706]	2852.54	2845.37	2848.72	2849.74	2849.2	2848.97	1343.76	1364.86	1341.38	1479.79	1608.62	1601.21	24.11	23.92	23.05	26.38	28.14	27.77	1456.6	0.211752	0.0681123	3.10886	0.00187809	0.0521647
ENST00000401642.7	SCFD2-202	protein_coding	SCFD2	sec1 family domain containing 2 [Source:HGNC Symbol;Acc:HGNC:30676]	2997.54	2990.37	2993.72	2994.74	2994.2	2993.97	287.008	340.629	404.501	207.109	172.883	246.402	4.9	5.68	6.61	3.51	2.87	4.07	276.422	-0.715528	0.230125	-3.1093	0.0018753	0.0521647
ENST00000428216.3	MAVS-202	protein_coding	MAVS	mitochondrial antiviral signaling protein [Source:HGNC Symbol;Acc:HGNC:29233]	11535.5	11528.4	11531.7	11532.7	11532.2	11532	4979.95	5070.92	5136.02	5402.87	5458.13	5523.01	22.07	21.95	21.8	23.8	23.58	23.67	5261.82	0.109719	0.0352892	3.10914	0.00187634	0.0521647
ENST00000262177.8	DNAJB6-201	protein_coding	DNAJB6	DnaJ heat shock protein family (Hsp40) member B6 [Source:HGNC Symbol;Acc:HGNC:14888]	2348.54	2341.37	2344.72	2345.74	2345.2	2344.97	1315.7	1394.58	1353.12	1487.23	1857.12	1897.56	28.68	29.67	28.24	32.21	39.44	39.99	1550.89	0.36779	0.118318	3.10848	0.00188054	0.0521724
ENST00000393820.2	NPM1-203	protein_coding	NPM1	nucleophosmin [Source:HGNC Symbol;Acc:HGNC:7910]	1419.54	1412.37	1415.72	1416.74	1416.2	1415.97	3559.34	3673.05	3849.13	3131.63	3348.12	3312.25	128.48	129.49	133.05	112.35	117.8	115.61	3478.92	-0.178873	0.0576033	-3.10525	0.00190118	0.0526843
ENST00000275820.3	NOM1-201	protein_coding	NOM1	nucleolar protein with MIF4G domain 1 [Source:HGNC Symbol;Acc:HGNC:13244]	5898.54	5891.37	5894.72	5895.74	5895.2	5894.97	1089.64	1102.42	1193.37	961.604	940.07	956.12	9.45	9.33	9.91	8.29	7.94	8.01	1040.54	-0.244813	0.0788526	-3.10469	0.00190476	0.0527224
ENST00000485852.7	ALDH7A1-208	protein_coding	ALDH7A1	aldehyde dehydrogenase 7 family member A1 [Source:HGNC Symbol;Acc:HGNC:877]	400.63	393.47	396.81	397.82	397.28	397.06	173.045	143.276	158.081	107.159	93.1732	102.352	22.22	17.97	19.5	13.68	11.68	12.73	129.514	-0.647349	0.20857	-3.10375	0.00191084	0.0528298
ENST00000371370.7	LRRC42-203	protein_coding	LRRC42	leucine rich repeat containing 42 [Source:HGNC Symbol;Acc:HGNC:28792]	1858.54	1851.37	1854.72	1855.74	1855.2	1854.97	121.513	112.877	127.043	188.841	220.151	164.545	3.34	3.03	3.36	5.18	5.9	4.39	155.828	0.657809	0.21202	3.10257	0.00191846	0.0529157
ENST00000389531.7	SDK1-201	protein_coding	SDK1	sidekick cell adhesion molecule 1 [Source:HGNC Symbol;Acc:HGNC:19307]	7427.54	7420.37	7423.72	7424.74	7424.2	7423.97	234.417	123.978	207.25	112.69	64.8326	72.0362	1.62	0.83	1.37	0.77	0.43	0.48	135.867	-1.18137	0.380811	-3.10225	0.00192056	0.0529157
ENST00000409158.5	PLEKHB2-204	protein_coding	PLEKHB2	pleckstrin homology domain containing B2 [Source:HGNC Symbol;Acc:HGNC:19236]	2098.54	2091.37	2094.72	2095.74	2095.2	2094.97	110.814	108.337	128.712	168.462	193.14	172.73	2.7	2.59	3	4.09	4.59	4.07	147.032	0.613138	0.197627	3.1025	0.00191895	0.0529157
ENST00000375643.7	IARS-202	protein_coding	IARS	isoleucyl-tRNA synthetase [Source:HGNC Symbol;Acc:HGNC:5330]	4477.54	4470.37	4473.72	4474.74	4474.2	4473.97	5302.28	5826.64	5969.49	4953.8	5131.18	4706.14	60.57	65	65.31	56.25	57.12	51.99	5314.92	-0.209742	0.0676315	-3.10124	0.0019271	0.0530349
ENST00000373389.5	ZFAND3-202	protein_coding	ZFAND3	zinc finger AN1-type containing 3 [Source:HGNC Symbol;Acc:HGNC:18019]	352.66	345.52	348.85	349.86	349.32	349.1	249.961	301.715	239.242	194.986	164.734	150.667	36.6	43.2	33.55	28.32	23.51	21.34	216.884	-0.631324	0.203754	-3.09846	0.00194527	0.0534739
ENST00000314616.10	SUPT6H-201	protein_coding	SUPT6H	SPT6 homolog, histone chaperone [Source:HGNC Symbol;Acc:HGNC:11470]	6344.54	6337.37	6340.72	6341.74	6341.2	6340.97	5094.14	4781.45	5086.85	5367.21	5616.11	5804.66	41.06	37.64	39.27	43.01	44.12	45.24	5291.74	0.165948	0.0536063	3.09567	0.00196368	0.0539182
ENST00000506572.5	CCNB1-204	protein_coding	CCNB1	cyclin B1 [Source:HGNC Symbol;Acc:HGNC:1579]	1152.54	1145.37	1148.72	1149.74	1149.2	1148.97	2414.09	2679.62	2669.06	2266.67	2171.71	2261.15	107.37	116.39	113.7	100.22	94.15	97.26	2410.39	-0.211473	0.0683293	-3.09491	0.00196875	0.0539954
ENST00000301843.12	CTTN-201	protein_coding	CTTN	cortactin [Source:HGNC Symbol;Acc:HGNC:3338]	3093.54	3086.37	3089.72	3090.74	3090.2	3089.97	11732	11568.5	11565	12115.4	12844.7	12592.7	194.05	186.88	183.21	199.21	207.06	201.41	12069.7	0.106838	0.0345254	3.09446	0.0019717	0.0540146
ENST00000478738.5	CMPK2-206	protein_coding	CMPK2	cytidine/uridine monophosphate kinase 2 [Source:HGNC Symbol;Acc:HGNC:27015]	2238.54	2231.37	2234.72	2235.74	2235.2	2234.97	263.658	390.422	331.805	502.175	607.785	451.061	6.03	8.71	7.27	11.42	13.55	9.98	424.484	0.662607	0.21418	3.0937	0.00197678	0.054092
ENST00000587627.1	PLEKHH3-203	protein_coding	PLEKHH3	pleckstrin homology, MyTH4 and FERM domain containing H3 [Source:HGNC Symbol;Acc:HGNC:26105]	868.54	861.37	864.72	865.74	865.2	864.97	73.1094	64.4881	57.6838	135.139	125.599	96.6055	4.3	3.74	3.28	7.95	7.23	5.52	92.104	0.867455	0.280428	3.09333	0.00197926	0.0540984
ENST00000420894.6	TCP1-203	protein_coding	TCP1	t-complex 1 [Source:HGNC Symbol;Acc:HGNC:11655]	1492.54	1485.37	1488.72	1489.74	1489.2	1488.97	639.436	610.967	593.453	489.228	488.917	388.856	21.94	20.49	19.51	16.71	16.37	12.9	535.143	-0.435868	0.14094	-3.09258	0.00198422	0.0541563
ENST00000527447.1	CREBZF-204	protein_coding	CREBZF	CREB/ATF bZIP transcription factor [Source:HGNC Symbol;Acc:HGNC:24905]	3858.54	3851.37	3854.72	3855.74	3855.2	3854.97	1283.37	1156.91	1226	1063.5	918.45	1005.25	17.02	14.98	15.57	14.02	11.87	12.88	1108.91	-0.294624	0.0952755	-3.09233	0.0019859	0.0541563
ENST00000339556.8	S100A13-201	protein_coding	S100A13	S100 calcium binding protein A13 [Source:HGNC Symbol;Acc:HGNC:10490]	335.68	328.54	331.87	332.88	332.34	332.12	1048.95	970.57	1083.34	1342.27	1506.89	1182.43	161.39	145.82	159.57	205.26	225.87	175.88	1189.08	0.37479	0.12124	3.09131	0.00199272	0.0542721
ENST00000455528.5	SON-208	protein_coding	SON	SON DNA binding protein [Source:HGNC Symbol;Acc:HGNC:11183]	8215.54	8208.37	8211.72	8212.74	8212.2	8211.97	431.275	776.516	405.305	1030.32	1125.12	822.685	2.68	4.72	2.42	6.37	6.83	4.95	765.203	0.885676	0.286531	3.09103	0.00199467	0.0542721
ENST00000324862.6	PRPF3-201	protein_coding	PRPF3	pre-mRNA processing factor 3 [Source:HGNC Symbol;Acc:HGNC:17348]	2254.54	2247.37	2250.72	2251.74	2251.2	2250.97	2317.54	2165.35	2223.17	2011.92	1982.73	1882.01	52.61	48.02	48.33	45.4	43.87	41.33	2097.12	-0.192188	0.062197	-3.09	0.00200159	0.054298
ENST00000337737.7	DTX3-201	protein_coding	DTX3	deltex E3 ubiquitin ligase 3 [Source:HGNC Symbol;Acc:HGNC:24457]	1850.54	1843.37	1846.72	1847.74	1847.2	1846.97	509.276	481.989	412.89	658.797	596.973	605.788	14.1	13.04	10.94	18.11	16.1	16.2	544.286	0.408173	0.132106	3.08975	0.00200327	0.054298
ENST00000398341.7	SLC37A1-202	protein_coding	SLC37A1	solute carrier family 37 member 1 [Source:HGNC Symbol;Acc:HGNC:11024]	2915.54	2908.37	2911.72	2912.74	2912.2	2911.97	894.077	917.022	984.512	1122.46	1081.87	1256.57	15.69	15.71	16.55	19.58	18.5	21.33	1042.75	0.309805	0.100243	3.09055	0.00199789	0.054298
ENST00000438684.1	MSL3P1-201	transcribed_processed_pseudogene	MSL3P1	MSL complex subunit 3 pseudogene 1 [Source:HGNC Symbol;Acc:HGNC:17837]	1853.54	1846.37	1849.72	1850.74	1850.2	1849.97	488.728	564.389	525.724	435.621	376.823	365.11	13.5	15.22	13.92	11.96	10.15	9.75	459.399	-0.422599	0.136784	-3.08954	0.00200467	0.054298
ENST00000234142.9	GREB1-201	protein_coding	GREB1	growth regulation by estrogen in breast cancer 1 [Source:HGNC Symbol;Acc:HGNC:24885]	8265.54	8258.37	8261.72	8262.74	8262.2	8261.97	8829.52	9781.37	9245.12	6947.16	8185.13	8191.64	54.62	59.09	54.78	42.72	49.35	49	8529.99	-0.256055	0.0828919	-3.08902	0.00200818	0.0543318
ENST00000392316.5	MYO1B-203	protein_coding	MYO1B	myosin IB [Source:HGNC Symbol;Acc:HGNC:7596]	4585.54	4578.37	4581.72	4582.74	4582.2	4581.97	788.022	1108.26	1124.03	683.618	700.996	720.369	8.79	12.08	12.01	7.58	7.62	7.77	854.215	-0.52026	0.168503	-3.08754	0.0020182	0.0545413
ENST00000442234.5	LIG4-203	protein_coding	LIG4	DNA ligase 4 [Source:HGNC Symbol;Acc:HGNC:6601]	3803.54	3796.37	3799.72	3800.74	3800.2	3799.97	152.035	184.928	139.566	338.043	222.859	250.493	2.04	2.43	1.8	4.52	2.93	3.25	214.654	0.771953	0.250139	3.0861	0.002028	0.0547447
ENST00000590151.5	ACLY-207	protein_coding	ACLY	ATP citrate lyase [Source:HGNC Symbol;Acc:HGNC:115]	4130.54	4123.37	4126.72	4127.74	4127.2	4126.97	2223.45	2318.19	2446.98	2741.94	2566.26	2732.5	27.53	28.03	29.03	33.76	30.97	32.72	2504.89	0.202991	0.0658066	3.08467	0.0020378	0.0549473
ENST00000424349.1	FGD5-AS1-202	antisense_RNA	FGD5-AS1	FGD5 antisense RNA 1 [Source:HGNC Symbol;Acc:HGNC:40410]	3613.54	3606.37	3609.72	3610.74	3610.2	3609.97	5239.6	5513.18	5672.92	5082.41	4744.86	4764.29	74.18	76.24	76.92	71.52	65.47	65.22	5169.54	-0.170785	0.0553725	-3.0843	0.00204034	0.0549542
ENST00000352732.9	ABHD2-201	protein_coding	ABHD2	abhydrolase domain containing 2 [Source:HGNC Symbol;Acc:HGNC:18717]	8556.54	8549.37	8552.72	8553.74	8553.2	8552.97	4234.08	4878.78	4741.64	3763.91	4097.97	3934.15	25.3	28.48	27.14	22.36	23.87	22.73	4275.09	-0.232097	0.0752671	-3.08365	0.0020448	0.0550125
ENST00000381989.3	PARP4-201	protein_coding	PARP4	poly(ADP-ribose) polymerase family member 4 [Source:HGNC Symbol;Acc:HGNC:271]	5295.54	5288.37	5291.72	5292.74	5292.2	5291.97	3600.58	3793.37	3909.41	4206.96	4272.17	4136.38	34.77	35.78	36.16	40.39	40.22	38.63	3986.48	0.157881	0.0512152	3.08271	0.00205125	0.0550626
ENST00000398958.6	RCC1-204	protein_coding	RCC1	regulator of chromosome condensation 1 [Source:HGNC Symbol;Acc:HGNC:1913]	2536.54	2529.37	2532.72	2533.74	2533.2	2532.97	87.604	147.79	167.989	62.2375	35.1167	66.3081	1.77	2.9	3.25	1.25	0.7	1.3	94.5074	-1.29117	0.41883	-3.0828	0.00205062	0.0550626
ENST00000315436.7	WSB2-201	protein_coding	WSB2	WD repeat and SOCS box containing 2 [Source:HGNC Symbol;Acc:HGNC:19222]	2467.54	2460.37	2463.72	2464.74	2464.2	2463.97	1944.2	1978.88	2096.94	2194.39	2593.23	2468.14	40.33	40.08	41.65	45.25	52.42	49.51	2212.63	0.268579	0.0871494	3.08183	0.00205734	0.0551643
ENST00000266744.3	ASCL1-201	protein_coding	ASCL1	achaete-scute family bHLH transcription factor 1 [Source:HGNC Symbol;Acc:HGNC:738]	2293.54	2286.37	2289.72	2290.74	2290.2	2289.97	77.7597	137.658	105.308	179.196	318.75	193.195	1.74	3	2.25	3.98	6.93	4.17	168.644	1.10747	0.359492	3.08064	0.00206555	0.0553227
ENST00000377475.7	SEC23B-204	protein_coding	SEC23B	Sec23 homolog B, coat complex II component [Source:HGNC Symbol;Acc:HGNC:10702]	3226.54	3219.37	3222.72	3223.74	3223.2	3222.97	1337.69	1516.9	1242.74	1804.99	1611.33	2197.15	21.22	23.49	18.87	28.46	24.9	33.7	1618.47	0.456243	0.148205	3.07845	0.00208081	0.0556692
ENST00000471785.5	PARP9-204	protein_coding	PARP9	poly(ADP-ribose) polymerase family member 9 [Source:HGNC Symbol;Acc:HGNC:24118]	2861.54	2854.37	2857.72	2858.74	2858.2	2857.97	1054.09	715.137	937.712	1230.84	1707.22	1245.11	18.85	12.49	16.06	21.88	29.75	21.54	1148.35	0.625993	0.203398	3.07767	0.00208626	0.0557529
ENST00000307227.9	SUCLG2-201	protein_coding	SUCLG2	succinate-CoA ligase GDP-forming beta subunit [Source:HGNC Symbol;Acc:HGNC:11450]	2173.54	2166.37	2169.72	2170.74	2170.2	2169.97	2302.21	2294.12	2652.78	2064.48	1966.52	2031.83	54.23	52.76	59.84	48.32	45.16	46.28	2218.66	-0.258108	0.0838827	-3.07701	0.00209085	0.0558135
ENST00000555062.1	DYNC1H1-204	protein_coding	DYNC1H1	dynein cytoplasmic 1 heavy chain 1 [Source:HGNC Symbol;Acc:HGNC:2961]	1172.54	1165.37	1168.72	1169.74	1169.2	1168.97	1251.29	1265.71	1231.29	1411.72	1520.74	1410.56	54.71	54.06	51.55	61.37	64.8	59.65	1348.55	0.210921	0.0685609	3.07641	0.0020951	0.0558647
ENST00000483765.5	RPL21-208	protein_coding	RPL21	ribosomal protein L21 [Source:HGNC Symbol;Acc:HGNC:10313]	274.79	267.7	271	272	271.46	271.26	1157.11	1414.83	1227.52	1036.55	1005.9	883.574	217.92	260.31	221.48	194.06	184.73	160.91	1120.91	-0.377203	0.122709	-3.07397	0.0021123	0.0562609
ENST00000579953.5	HELZ-206	protein_coding	HELZ	helicase with zinc finger [Source:HGNC Symbol;Acc:HGNC:16878]	6186.54	6179.37	6182.72	6183.74	6183.2	6182.97	132.406	145.407	154.603	244.695	186.393	232.481	1.1	1.17	1.22	2.01	1.5	1.86	182.664	0.621744	0.202292	3.0735	0.00211566	0.0562879
ENST00000490175.5	SNX5-214	protein_coding	SNX5	sorting nexin 5 [Source:HGNC Symbol;Acc:HGNC:14969]	1846.54	1839.37	1842.72	1843.74	1843.2	1842.97	1266.93	1843.31	1703.38	1071.88	1008.91	1247.6	35.14	49.91	45.24	29.55	27.26	33.46	1357	-0.53072	0.172757	-3.07206	0.00212584	0.0564336
ENST00000605788.5	NOLC1-209	protein_coding	NOLC1	nucleolar and coiled-body phosphoprotein 1 [Source:HGNC Symbol;Acc:HGNC:15608]	3753.54	3746.37	3749.72	3750.74	3750.2	3749.97	3526.28	3596	3475.78	3130.38	3298.31	3015.74	48.06	47.87	45.37	42.42	43.81	39.75	3340.42	-0.167608	0.0545551	-3.07228	0.00212431	0.0564336
ENST00000404643.5	YY1AP1-212	protein_coding	YY1AP1	YY1 associated protein 1 [Source:HGNC Symbol;Acc:HGNC:30935]	2475.54	2468.37	2471.72	2472.74	2472.2	2471.97	549.742	268.513	428.749	729.677	782.02	701.557	11.36	5.43	8.48	14.99	15.76	14.03	576.709	0.82548	0.268741	3.07165	0.00212879	0.0564495
ENST00000234875.8	RPL22-201	protein_coding	RPL22	ribosomal protein L22 [Source:HGNC Symbol;Acc:HGNC:10315]	1899.54	1892.37	1895.72	1896.74	1896.2	1895.97	6898.79	7947.33	8542.76	6333.73	6689.62	6401.69	185.96	209.2	220.55	169.71	175.76	166.87	7135.66	-0.268078	0.0873273	-3.06981	0.00214196	0.0567359
ENST00000539345.6	TBCD-202	protein_coding	TBCD	tubulin folding cofactor D [Source:HGNC Symbol;Acc:HGNC:11581]	3796.54	3789.37	3792.72	3793.74	3793.2	3792.97	1413.92	1165.95	1338.83	1078.52	1042.71	1035.54	19.05	15.35	17.27	14.44	13.69	13.49	1179.25	-0.313343	0.102161	-3.06716	0.00216105	0.0571785
ENST00000301050.6	CACNB3-201	protein_coding	CACNB3	calcium voltage-gated channel auxiliary subunit beta 3 [Source:HGNC Symbol;Acc:HGNC:1403]	2517.54	2510.37	2513.72	2514.74	2514.2	2513.97	615.904	658.856	664.433	887.42	945.448	738.394	12.52	13.09	12.94	17.93	18.72	14.51	751.742	0.404286	0.131879	3.06557	0.00217255	0.0573563
ENST00000376521.6	SLC35A2-204	protein_coding	SLC35A2	solute carrier family 35 member A2 [Source:HGNC Symbol;Acc:HGNC:11022]	2868.54	2861.37	2864.72	2865.74	2865.2	2864.97	148.414	166.94	214.788	237.154	334.961	333.994	2.65	2.9	3.67	4.21	5.82	5.75	239.375	0.771735	0.251733	3.06569	0.00217165	0.0573563
ENST00000216962.8	PYGB-201	protein_coding	PYGB	glycogen phosphorylase B [Source:HGNC Symbol;Acc:HGNC:9723]	3955.54	3948.37	3951.72	3952.74	3952.2	3951.97	2627.62	2571.99	2656.76	2878.22	2928.24	3210.57	33.98	32.49	32.91	37	36.91	40.16	2812.23	0.199786	0.0651942	3.06448	0.00218046	0.057502
ENST00000368931.7	BNIPL-203	protein_coding	BNIPL	BCL2 interacting protein like [Source:HGNC Symbol;Acc:HGNC:16976]	1964.54	1957.37	1960.72	1961.74	1961.2	1960.97	72.3787	89.1632	69.3714	141.633	178.282	112.152	1.89	2.26	1.73	3.67	4.54	2.83	110.497	0.901155	0.294397	3.06102	0.00220582	0.0581036
ENST00000572925.1	SGSM2-206	protein_coding	SGSM2	small G protein signaling modulator 2 [Source:HGNC Symbol;Acc:HGNC:29026]	465.6	458.43	461.78	462.79	462.25	462.03	100.399	79.4941	95.3379	136.123	155.294	149.018	11.09	8.58	10.13	14.93	16.72	15.95	119.278	0.672295	0.219653	3.06071	0.00220812	0.0581036
ENST00000382040.3	RSAD2-201	protein_coding	RSAD2	radical S-adenosyl methionine domain containing 2 [Source:HGNC Symbol;Acc:HGNC:30908]	3340.54	3333.37	3336.72	3337.74	3337.2	3336.97	64.3833	65.4104	87.7522	139.507	118.858	121.973	0.99	0.98	1.29	2.13	1.77	1.81	99.6471	0.802019	0.2621	3.05997	0.00221356	0.0581829
ENST00000262428.4	COTL1-201	protein_coding	COTL1	coactosin like F-actin binding protein 1 [Source:HGNC Symbol;Acc:HGNC:18304]	1664.54	1657.37	1660.72	1661.74	1661.2	1660.97	954.024	1012.75	1126.7	837.947	845.482	822.731	29.37	30.43	33.19	25.63	25.35	24.47	933.271	-0.304952	0.0997021	-3.05863	0.0022235	0.0583803
ENST00000330398.8	ATP6V0C-201	protein_coding	ATP6V0C	ATPase H+ transporting V0 subunit c [Source:HGNC Symbol;Acc:HGNC:855]	996.54	989.37	992.72	993.74	993.2	992.97	3545.84	2858.51	2849.76	3713.45	3969.26	3867.43	182.5	143.67	140.48	189.99	199.07	192.47	3467.38	0.319367	0.104486	3.05655	0.002239	0.0587229
ENST00000396774.6	ATP6V1H-203	protein_coding	ATP6V1H	ATPase H+ transporting V1 subunit H [Source:HGNC Symbol;Acc:HGNC:18303]	1713.54	1706.37	1709.72	1710.74	1710.2	1709.97	143.827	160.313	225.672	266.086	368.717	291.435	4.29	4.7	6.45	7.89	10.74	8.43	242.675	0.80171	0.262399	3.05531	0.00224831	0.0589028
ENST00000394536.4	PCDH1-203	protein_coding	PCDH1	protocadherin 1 [Source:HGNC Symbol;Acc:HGNC:8655]	3648.54	3641.37	3644.72	3645.74	3645.2	3644.97	247.718	266.128	267.433	346.626	324.158	366.736	3.48	3.64	3.59	4.83	4.42	4.97	303.133	0.413184	0.135268	3.05457	0.00225386	0.0589839
ENST00000393766.6	MSMO1-202	protein_coding	MSMO1	methylsterol monooxygenase 1 [Source:HGNC Symbol;Acc:HGNC:10545]	1610.54	1603.37	1606.72	1607.74	1607.2	1606.97	136.662	130.978	183.048	223.164	232.304	288.161	4.34	4.07	5.57	7.07	7.21	8.87	199.053	0.722091	0.23646	3.05375	0.00225997	0.0590793
ENST00000261366.9	LMNB1-201	protein_coding	LMNB1	lamin B1 [Source:HGNC Symbol;Acc:HGNC:6637]	2699.54	2692.37	2695.72	2696.74	2696.2	2695.97	4103.42	3921.15	4336.74	3767.58	3534.64	3556.07	77.8	72.59	78.73	71	65.3	65.19	3869.93	-0.187573	0.0614578	-3.05206	0.00227273	0.0593483
ENST00000370775.2	RTL8A-201	protein_coding	RTL8A	retrotransposon Gag like 8A [Source:HGNC Symbol;Acc:HGNC:24514]	1065.54	1058.37	1061.72	1062.74	1062.2	1061.97	967.184	847.849	834.26	706.895	709.043	720.43	46.56	39.86	38.43	33.83	33.23	33.52	797.61	-0.310535	0.101809	-3.05015	0.00228723	0.059662
ENST00000437654.5	IRF1-203	protein_coding	IRF1	interferon regulatory factor 1 [Source:HGNC Symbol;Acc:HGNC:6116]	653.55	646.38	649.73	650.75	650.21	649.98	116.643	75.91	76.0864	172.634	145.85	167.02	9.15	5.86	5.72	13.48	11.16	12.72	125.691	0.853182	0.279823	3.04901	0.002296	0.0598257
ENST00000164133.6	PPP2R5B-201	protein_coding	PPP2R5B	protein phosphatase 2 regulatory subunit B'beta [Source:HGNC Symbol;Acc:HGNC:9310]	2566.54	2559.37	2562.72	2563.74	2563.2	2562.97	170.741	201.938	201.419	271.485	275.531	257.865	3.4	3.93	3.85	5.39	5.35	4.97	229.83	0.486966	0.160026	3.04304	0.00234204	0.0609591
ENST00000424649.6	PXN-204	protein_coding	PXN	paxillin [Source:HGNC Symbol;Acc:HGNC:9718]	3504.54	3497.37	3500.72	3501.74	3501.2	3500.97	3732.62	3502.66	3804.25	4031.78	4111.4	4215.01	54.5	49.94	53.19	58.51	58.5	59.5	3899.62	0.162332	0.0533552	3.04247	0.00234643	0.0610071
ENST00000305218.8	STIP1-201	protein_coding	STIP1	stress induced phosphoprotein 1 [Source:HGNC Symbol;Acc:HGNC:11387]	2017.54	2010.37	2013.72	2014.74	2014.2	2013.97	9786.77	9634.79	10102.3	10469.2	10520	10647.9	248.34	238.78	245.53	264.09	260.2	261.29	10193.5	0.0995175	0.0327185	3.04163	0.00235302	0.0610676
ENST00000490549.1	GPR158-203	protein_coding	GPR158	G protein-coupled receptor 158 [Source:HGNC Symbol;Acc:HGNC:23689]	4608.54	4601.37	4604.72	4605.74	4605.2	4604.97	134.17	146.564	152.099	202.832	221.509	199.739	1.49	1.59	1.61	2.24	2.4	2.14	176.152	0.524861	0.172565	3.04152	0.00235384	0.0610676
ENST00000419300.3	LINC00963-202	processed_transcript	LINC00963	long intergenic non-protein coding RNA 963 [Source:HGNC Symbol;Acc:HGNC:48716]	9378.54	9371.37	9374.72	9375.74	9375.2	9374.97	1003.08	1040.18	1006.99	1195.61	1133.22	1242.62	5.47	5.54	5.26	6.48	6.02	6.55	1103.62	0.230625	0.0758402	3.04093	0.00235849	0.0611221
ENST00000420554.6	GMPR2-204	protein_coding	GMPR2	guanosine monophosphate reductase 2 [Source:HGNC Symbol;Acc:HGNC:4377]	1685.54	1678.37	1681.72	1682.74	1682.2	1681.97	311.763	279.993	280.002	224.241	201.241	211.208	9.47	8.31	8.14	6.77	5.95	6.21	251.408	-0.452403	0.14881	-3.04014	0.00236465	0.0612155
ENST00000437089.5	TRIM26-266	protein_coding	TRIM26	tripartite motif containing 26 [Source:HGNC Symbol;Acc:HGNC:12962]	3071.54	3064.37	3067.72	3068.74	3068.2	3067.97	676.857	986.891	988.684	1221.2	1239.9	1803.4	11.28	16.05	15.78	20.23	20.14	29.05	1152.82	0.686318	0.22579	3.03962	0.00236873	0.0612552
ENST00000253925.11	PPFIA1-201	protein_coding	PPFIA1	PTPRF interacting protein alpha 1 [Source:HGNC Symbol;Acc:HGNC:9245]	5055.54	5048.37	5051.72	5052.74	5052.2	5051.97	3936.81	4290.65	4346.49	3596.29	3830.5	3550.26	39.83	42.39	42.12	36.16	37.76	34.74	3925.17	-0.196702	0.0647529	-3.03774	0.00238361	0.0614693
ENST00000256646.6	NOTCH2-201	protein_coding	NOTCH2	notch 2 [Source:HGNC Symbol;Acc:HGNC:7882]	11210.5	11203.4	11206.7	11207.7	11207.2	11207	6213.02	6133.62	6251.65	5787.1	5667.48	5860.27	28.34	27.32	27.31	26.23	25.19	25.84	5985.52	-0.102561	0.0337609	-3.03786	0.00238264	0.0614693
ENST00000637327.1	ATP6AP2-224	protein_coding	ATP6AP2	ATPase H+ transporting accessory protein 2 [Source:HGNC Symbol;Acc:HGNC:18305]	1750.54	1743.37	1746.72	1747.74	1747.2	1746.97	102.738	33.8673	106.985	203.858	209.345	221.032	3	0.96	2.99	5.92	5.95	6.25	146.304	1.37476	0.452582	3.0376	0.0023847	0.0614693
ENST00000371796.7	OLFM1-205	protein_coding	OLFM1	olfactomedin 1 [Source:HGNC Symbol;Acc:HGNC:17187]	2313.54	2306.37	2309.72	2310.74	2310.2	2309.97	828.554	1022.26	1064.78	755.416	749.602	639.344	18.34	22.08	22.56	16.61	16.15	13.67	843.326	-0.444775	0.146489	-3.03623	0.00239556	0.0616832
ENST00000399982.6	CHD8-201	protein_coding	CHD8	chromodomain helicase DNA binding protein 8 [Source:HGNC Symbol;Acc:HGNC:20153]	8050.54	8043.37	8046.72	8047.74	8047.2	8046.97	1782.35	1501.2	1875.27	2275.29	2059.79	2140.62	11.32	9.31	11.41	14.36	12.75	13.15	1939.09	0.327118	0.107776	3.03517	0.00240398	0.0618336
ENST00000292254.8	RUSC1-201	protein_coding	RUSC1	RUN and SH3 domain containing 1 [Source:HGNC Symbol;Acc:HGNC:17153]	1984.54	1977.37	1980.72	1981.74	1981.2	1980.97	116.165	74.4894	98.6242	175.969	218.801	145.716	3.01	1.89	2.44	4.53	5.49	3.64	138.294	0.892853	0.294206	3.03479	0.00240701	0.0618452
ENST00000342228.7	SLC20A2-201	protein_coding	SLC20A2	solute carrier family 20 member 2 [Source:HGNC Symbol;Acc:HGNC:10947]	3478.54	3471.37	3474.72	3475.74	3475.2	3474.97	794.093	746.548	808.988	902.507	938.707	1001.98	11.68	10.72	11.4	13.19	13.45	14.25	865.47	0.275307	0.0907647	3.0332	0.00241976	0.0621063
ENST00000323977.7	MRE11-202	protein_coding	MRE11	MRE11 homolog, double strand break repair nuclease [Source:HGNC Symbol;Acc:HGNC:7230]	2409.54	2402.37	2405.72	2406.74	2406.2	2405.97	320	319.295	372.754	263.969	237.712	220.209	6.8	6.61	7.58	5.58	4.91	4.52	288.99	-0.490881	0.161962	-3.03085	0.00243869	0.0625254
ENST00000342315.8	OAS2-201	protein_coding	OAS2	2'-5'-oligoadenylate synthetase 2 [Source:HGNC Symbol;Acc:HGNC:8087]	3434.54	3427.37	3430.72	3431.74	3431.2	3430.97	312.089	295.465	345.157	769.437	460.574	435.5	4.65	4.3	4.93	11.39	6.69	6.28	436.37	0.80508	0.265825	3.0286	0.00245686	0.0628569
ENST00000355815.8	SREBF1-202	protein_coding	SREBF1	sterol regulatory element binding transcription factor 1 [Source:HGNC Symbol;Acc:HGNC:11289]	4074.54	4067.37	4070.72	4071.74	4071.2	4070.97	1338.88	810.7	1223.49	1582.92	1867.97	1680.59	16.81	9.94	14.71	19.75	22.85	20.4	1417.43	0.603976	0.199408	3.02885	0.00245487	0.0628569
ENST00000296161.8	DTX3L-201	protein_coding	DTX3L	deltex E3 ubiquitin ligase 3L [Source:HGNC Symbol;Acc:HGNC:30323]	5689.54	5682.37	5685.72	5686.74	5686.2	5685.97	4952.47	5310.45	5315.03	6263.28	6111.8	5552.54	44.52	46.62	45.76	55.97	53.55	48.26	5584.26	0.202174	0.0667855	3.02722	0.00246817	0.0630788
ENST00000337910.9	RHOBTB1-201	protein_coding	RHOBTB1	Rho related BTB domain containing 1 [Source:HGNC Symbol;Acc:HGNC:18738]	4294.54	4287.37	4290.72	4291.74	4291.2	4290.97	240.598	186.035	268.264	391.709	402.498	308.613	2.87	2.16	3.06	4.63	4.68	3.56	299.62	0.660468	0.218422	3.02382	0.00249606	0.063724
ENST00000445626.6	ALG3-205	protein_coding	ALG3	ALG3, alpha-1,3- mannosyltransferase [Source:HGNC Symbol;Acc:HGNC:23056]	1354.54	1347.37	1350.72	1351.74	1351.2	1350.97	99.9998	85.8509	70.2131	124.447	158.019	168.642	3.79	3.16	2.56	4.67	5.82	6.16	117.862	0.819333	0.271005	3.02332	0.00250018	0.0637613
ENST00000369754.7	FAM46A-202	protein_coding	FAM46A	family with sequence similarity 46 member A [Source:HGNC Symbol;Acc:HGNC:18345]	5485.54	5478.37	5481.72	5482.74	5482.2	5481.97	187.86	165.709	145.412	371.33	255.277	234.937	1.75	1.51	1.29	3.44	2.31	2.12	226.754	0.787736	0.260706	3.02155	0.00251488	0.0640679
ENST00000637937.1	CTSD-214	protein_coding	CTSD	cathepsin D [Source:HGNC Symbol;Acc:HGNC:2529]	1083.54	1076.37	1079.72	1080.74	1080.2	1079.97	5311.77	5181.75	4760.61	5376.32	7507.76	7305.8	251.34	239.47	215.77	252.91	346.29	334.32	5907.34	0.404436	0.133916	3.02007	0.00252717	0.0643128
ENST00000258381.10	SP110-201	protein_coding	SP110	SP110 nuclear body protein [Source:HGNC Symbol;Acc:HGNC:5401]	2247.54	2240.37	2243.72	2244.74	2244.2	2243.97	79.5448	78.9865	89.4284	125.544	139.115	126.887	1.82	1.75	1.96	2.85	3.08	2.8	106.584	0.653785	0.216577	3.01872	0.00253845	0.0645316
ENST00000287936.8	HMGCR-201	protein_coding	HMGCR	3-hydroxy-3-methylglutaryl-CoA reductase [Source:HGNC Symbol;Acc:HGNC:5006]	4406.54	4399.37	4402.72	4403.74	4403.2	4402.97	2233.41	2203.06	2446.97	2860.02	2536.55	2721.85	25.93	24.98	27.2	33	28.69	30.55	2500.31	0.238193	0.0789399	3.0174	0.00254953	0.0646819
ENST00000373798.5	EPB41-206	protein_coding	EPB41	erythrocyte membrane protein band 4.1 [Source:HGNC Symbol;Acc:HGNC:3377]	5754.54	5747.37	5750.72	5751.74	5751.2	5750.97	1.7892	0	35.0992	169.568	117.509	223.477	0.02	0	0.3	1.5	1.02	1.92	91.2403	3.77993	1.25272	3.01737	0.00254976	0.0646819
ENST00000376744.8	SLC15A4-204	protein_coding	SLC15A4	solute carrier family 15 member 4 [Source:HGNC Symbol;Acc:HGNC:23090]	2223.54	2216.37	2219.72	2220.74	2220.2	2219.97	170.706	160.233	142.919	85.8418	116.154	81.0437	3.93	3.61	3.15	1.95	2.59	1.81	126.149	-0.753426	0.249817	-3.01591	0.00256208	0.0649259
ENST00000587294.5	BCAS3-213	protein_coding	BCAS3	BCAS3, microtubule associated cell migration factor [Source:HGNC Symbol;Acc:HGNC:14347]	758.55	751.37	754.73	755.74	755.2	754.97	128.312	117.737	125.406	173.731	191.772	278.361	8.68	7.81	8.14	11.65	12.62	18.23	169.22	0.797462	0.264575	3.01412	0.00257724	0.0652411
ENST00000333486.3	UBA7-201	protein_coding	UBA7	ubiquitin like modifier activating enzyme 7 [Source:HGNC Symbol;Acc:HGNC:12471]	3120.54	3113.37	3116.72	3117.74	3117.2	3116.97	434.555	365.425	337.64	578.408	513.248	491.985	7.12	5.85	5.31	9.43	8.2	7.8	453.543	0.476574	0.158144	3.01355	0.00258214	0.065279
ENST00000379310.7	VWA8-203	protein_coding	VWA8	von Willebrand factor A domain containing 8 [Source:HGNC Symbol;Acc:HGNC:29071]	6968.54	6961.37	6964.72	6965.74	6965.2	6964.97	696.071	717.969	770.503	603.159	509.206	594.299	5.11	5.15	5.42	4.4	3.64	4.22	648.535	-0.353337	0.117259	-3.01331	0.00258417	0.065279
ENST00000286827.7	TIAM1-201	protein_coding	TIAM1	T-cell lymphoma invasion and metastasis 1 [Source:HGNC Symbol;Acc:HGNC:11805]	7021.54	7014.37	7017.72	7018.74	7018.2	7017.97	339.09	312.208	356.002	258.65	199.9	247.215	2.47	2.22	2.48	1.87	1.42	1.74	285.511	-0.509626	0.169178	-3.01237	0.00259214	0.0653498
ENST00000549555.5	DAZAP2-208	protein_coding	DAZAP2	DAZ associated protein 2 [Source:HGNC Symbol;Acc:HGNC:2684]	693.55	686.38	689.73	690.74	690.2	689.98	1161.44	987.63	1020.86	1280.36	1265.41	1476.96	86.04	71.47	72.42	94.27	91.3	105.78	1198.78	0.344656	0.114415	3.01234	0.00259243	0.0653498
ENST00000313655.4	DSCC1-201	protein_coding	DSCC1	DNA replication and sister chromatid cohesion 1 [Source:HGNC Symbol;Acc:HGNC:24453]	2135.54	2128.37	2131.72	2132.74	2132.2	2131.97	873.135	901.653	985.393	776.859	746.898	755.591	20.94	21.1	22.63	18.51	17.46	17.52	839.921	-0.276626	0.0918682	-3.01112	0.00260288	0.0655446
ENST00000225171.6	DNAJC12-201	protein_coding	DNAJC12	DnaJ heat shock protein family (Hsp40) member C12 [Source:HGNC Symbol;Acc:HGNC:28908]	1022.54	1015.37	1018.72	1019.74	1019.2	1018.97	702.986	732.65	757.365	928.915	985.902	830.136	35.27	35.87	36.39	46.31	48.18	40.28	822.993	0.320821	0.106601	3.00954	0.00261644	0.0657479
ENST00000448841.5	WBP1L-202	protein_coding	WBP1L	WW domain binding protein 1 like [Source:HGNC Symbol;Acc:HGNC:23510]	3906.54	3899.37	3902.72	3903.74	3903.2	3902.97	1876.34	1612.44	1648.04	2015.39	2177.27	2006.4	24.57	20.62	20.67	26.24	27.79	25.4	1889.31	0.269738	0.0896196	3.00981	0.00261412	0.0657479
ENST00000306390.6	LRG1-201	protein_coding	LRG1	leucine rich alpha-2-glycoprotein 1 [Source:HGNC Symbol;Acc:HGNC:29480]	2857.54	2850.37	2853.72	2854.74	2854.2	2853.97	803.756	756.873	740.475	934.663	949.505	880.01	14.39	13.24	12.71	16.63	16.57	15.24	844.214	0.262499	0.0872944	3.00705	0.00263793	0.0660804
ENST00000345042.6	HSPD1-201	protein_coding	HSPD1	heat shock protein family D (Hsp60) member 1 [Source:HGNC Symbol;Acc:HGNC:5261]	2120.54	2113.37	2116.72	2117.74	2117.2	2116.97	13770.7	14230.3	14261.1	13151.8	12967.4	13433.6	332.46	335.51	329.73	315.63	305.11	313.61	13635.8	-0.0950304	0.031602	-3.0071	0.0026375	0.0660804
ENST00000568954.5	PHLPP2-206	protein_coding	PHLPP2	PH domain and leucine rich repeat protein phosphatase 2 [Source:HGNC Symbol;Acc:HGNC:29149]	8138.54	8131.37	8134.72	8135.74	8135.2	8134.97	1615.04	1698.42	1763.29	1934	1905.81	1948.25	10.15	10.42	10.61	12.08	11.67	11.84	1810.8	0.189511	0.0630174	3.00728	0.00263599	0.0660804
ENST00000480730.5	TAPBP-240	protein_coding	TAPBP	TAP binding protein [Source:HGNC Symbol;Acc:HGNC:11566]	2023.54	2016.37	2019.72	2020.74	2020.2	2019.97	193.02	181.702	167.159	243.569	244.463	267.691	4.89	4.49	4.06	6.14	6.04	6.56	216.267	0.483284	0.160769	3.00608	0.00264643	0.0662241
ENST00000361115.4	CCL28-201	protein_coding	CCL28	C-C motif chemokine ligand 28 [Source:HGNC Symbol;Acc:HGNC:17700]	2947.54	2940.37	2943.72	2944.74	2944.2	2943.97	299.52	372.218	290.004	415.29	449.766	479.707	5.19	6.32	4.82	7.16	7.62	8.06	384.417	0.487961	0.162407	3.00456	0.00265962	0.0664849
ENST00000305943.7	RNF187-201	protein_coding	RNF187	ring finger protein 187 [Source:HGNC Symbol;Acc:HGNC:27146]	2838.54	2831.37	2834.72	2835.74	2835.2	2834.97	907.459	911.414	1068.09	1143.91	1872	1371.18	16.37	16.06	18.44	20.5	32.89	23.9	1212.34	0.602326	0.200522	3.00379	0.00266643	0.0665184
ENST00000374429.6	CXCL12-203	protein_coding	CXCL12	C-X-C motif chemokine ligand 12 [Source:HGNC Symbol;Acc:HGNC:10672]	3353.54	3346.37	3349.72	3350.74	3350.2	3349.97	1641.78	1455.94	1565.33	1365.02	1300.68	1298.31	25.05	21.7	22.88	20.7	19.34	19.15	1437.84	-0.235419	0.0783742	-3.00378	0.0026665	0.0665184
ENST00000372003.5	TSPAN1-201	protein_coding	TSPAN1	tetraspanin 1 [Source:HGNC Symbol;Acc:HGNC:20657]	1436.54	1429.37	1432.72	1433.74	1433.2	1432.97	216.996	335.443	300.909	400.173	556.445	442.07	7.72	11.68	10.29	14.18	19.32	15.25	375.339	0.712748	0.237315	3.00338	0.00266998	0.066536
ENST00000405885.6	IRF1-202	protein_coding	IRF1	interferon regulatory factor 1 [Source:HGNC Symbol;Acc:HGNC:6116]	1882.54	1875.37	1878.72	1879.74	1879.2	1878.97	505.719	624.194	509.006	694.208	848.189	707.298	13.75	16.57	13.26	18.78	22.49	18.6	648.102	0.456972	0.152176	3.00292	0.00267402	0.0665675
ENST00000333046.8	TPRN-201	protein_coding	TPRN	taperin [Source:HGNC Symbol;Acc:HGNC:26894]	1930.54	1923.37	1926.72	1927.74	1927.2	1926.97	728.232	714.459	748.043	842.285	857.645	915.228	19.31	18.49	19	22.2	22.18	23.47	800.982	0.256548	0.0854737	3.00149	0.00268662	0.0667497
ENST00000475074.1	IMP4-214	protein_coding	IMP4	IMP4, U3 small nucleolar ribonucleoprotein [Source:HGNC Symbol;Acc:HGNC:30856]	333.68	326.54	329.88	330.89	330.34	330.13	101.878	151.522	119.626	193.89	205.242	196.523	15.79	22.83	17.7	29.84	31.06	29.38	161.447	0.680113	0.226618	3.00114	0.00268968	0.0667497
ENST00000504293.5	RPS23-203	protein_coding	RPS23	ribosomal protein S23 [Source:HGNC Symbol;Acc:HGNC:10410]	397.63	390.47	393.81	394.83	394.28	394.06	9418.41	9668.44	10671.8	8514.57	8698.88	8977.51	1221.22	1224.32	1325.29	1097.47	1099.35	1125.64	9324.94	-0.184258	0.0613936	-3.00125	0.00268869	0.0667497
ENST00000570259.1	HSBP1-204	protein_coding	HSBP1	heat shock factor binding protein 1 [Source:HGNC Symbol;Acc:HGNC:5203]	841.54	834.37	837.72	838.74	838.2	837.97	1574.33	1589.8	1587.58	1763.19	1746.22	1828.14	96.02	94.7	92.74	106.89	103.8	107.8	1681.54	0.169273	0.0564109	3.00071	0.0026935	0.0667755
ENST00000259235.7	SAP130-202	protein_coding	SAP130	Sin3A associated protein 130 [Source:HGNC Symbol;Acc:HGNC:29813]	3886.54	3879.37	3882.72	3883.74	3883.2	3882.97	682.383	685.574	650.192	514.042	532.161	580.391	8.99	8.82	8.2	6.73	6.83	7.39	607.457	-0.307872	0.102617	-3.00021	0.0026979	0.0668154
ENST00000418900.6	HIGD1A-202	protein_coding	HIGD1A	HIG1 hypoxia inducible domain family member 1A [Source:HGNC Symbol;Acc:HGNC:29527]	1143.54	1136.37	1139.72	1140.74	1140.2	1139.97	36.5898	80.2438	54.3343	126.581	179.625	103.152	1.62	3.53	2.33	5.66	7.83	4.48	96.7544	1.25995	0.420119	2.99903	0.00270838	0.0670059
ENST00000337354.8	SEC13-201	protein_coding	SEC13	SEC13 homolog, nuclear pore and COPII coat complex component [Source:HGNC Symbol;Acc:HGNC:10697]	1184.54	1177.37	1180.72	1181.74	1181.2	1180.97	368.614	120.917	349.407	732.685	694.194	544.41	15.96	5.13	14.5	31.51	29.3	22.79	468.371	1.23005	0.410202	2.99866	0.00271173	0.0670196
ENST00000372851.7	RIMS4-201	protein_coding	RIMS4	regulating synaptic membrane exocytosis 4 [Source:HGNC Symbol;Acc:HGNC:16183]	5024.54	5017.37	5020.72	5021.74	5021.2	5020.97	490.198	571.563	555.743	443.231	393.045	403.569	4.99	5.69	5.42	4.48	3.9	3.97	476.225	-0.382043	0.12751	-2.99617	0.0027339	0.067498
ENST00000308497.8	STOX2-201	protein_coding	STOX2	storkhead box 2 [Source:HGNC Symbol;Acc:HGNC:25450]	10279.5	10272.4	10275.7	10276.7	10276.2	10276	104.696	147.626	140.393	78.3486	79.6904	67.1243	0.52	0.72	0.67	0.39	0.38	0.32	102.98	-0.805807	0.269013	-2.99542	0.00274068	0.0675265
ENST00000360004.5	HLA-DRB1-201	protein_coding	HLA-DRB1	major histocompatibility complex, class II, DR beta 1 [Source:HGNC Symbol;Acc:HGNC:4948]	1050.54	1043.37	1046.72	1047.74	1047.2	1046.97	637.027	595.785	561.749	798.066	732.001	713.882	31.11	28.4	26.25	38.7	34.84	33.69	673.085	0.32216	0.107542	2.99567	0.00273841	0.0675265
ENST00000312547.6	CHMP2A-201	protein_coding	CHMP2A	charged multivesicular body protein 2A [Source:HGNC Symbol;Acc:HGNC:30216]	734.55	727.37	730.73	731.74	731.2	730.97	1421.91	1401.75	1452.23	1656.83	1617.9	1577.66	99.39	95.73	97.23	115.13	110.25	106.67	1521.38	0.181083	0.060474	2.9944	0.00274983	0.0676824
ENST00000268058.7	PML-201	protein_coding	PML	promyelocytic leukemia [Source:HGNC Symbol;Acc:HGNC:9113]	4329.54	4322.37	4325.72	4326.74	4326.2	4325.97	307.682	347.263	245.7	382.05	637.514	502.622	3.64	4.01	2.78	4.49	7.33	5.75	403.805	0.757218	0.252964	2.99339	0.00275901	0.0677002
ENST00000315571.5	LDLRAD3-201	protein_coding	LDLRAD3	low density lipoprotein receptor class A domain containing 3 [Source:HGNC Symbol;Acc:HGNC:27046]	3619.54	3612.37	3615.72	3616.74	3616.2	3615.97	406.005	439.791	471.35	348.772	340.366	316.801	5.74	6.07	6.38	4.9	4.7	4.33	387.181	-0.39136	0.130717	-2.99396	0.00275382	0.0677002
ENST00000358739.4	HIST1H2AI-201	protein_coding	HIST1H2AI	histone cluster 1 H2A family member i [Source:HGNC Symbol;Acc:HGNC:4725]	324.69	317.56	320.89	321.9	321.36	321.14	147.904	188.034	188.23	228.159	305.154	281.688	23.53	29.13	28.63	36.12	47.32	43.31	223.195	0.636693	0.212679	2.99368	0.00275638	0.0677002
ENST00000351554.7	CD59-201	protein_coding	CD59	CD59 molecule (CD59 blood group) [Source:HGNC Symbol;Acc:HGNC:1689]	1596.54	1589.37	1592.72	1593.74	1593.2	1592.97	569.863	703.457	594.279	812.184	773.897	805.542	18.27	22.02	18.27	25.9	24.19	25	709.87	0.359837	0.120308	2.99097	0.00278089	0.0681367
ENST00000368194.7	ARHGEF11-202	protein_coding	ARHGEF11	Rho guanine nucleotide exchange factor 11 [Source:HGNC Symbol;Acc:HGNC:14580]	6710.54	6703.37	6706.72	6707.74	6707.2	6706.97	908.991	910.724	913.407	1080.75	1031.92	1049.44	6.93	6.78	6.67	8.18	7.67	7.74	982.537	0.210838	0.0704954	2.9908	0.00278248	0.0681367
ENST00000536899.6	ZNF268-206	protein_coding	ZNF268	zinc finger protein 268 [Source:HGNC Symbol;Acc:HGNC:13061]	3057.54	3050.37	3053.72	3054.74	3054.2	3053.97	97.4598	148.88	178.013	62.2403	74.2858	76.1309	1.63	2.43	2.85	1.04	1.21	1.23	106.168	-0.996322	0.333207	-2.9901	0.00278884	0.0682229
ENST00000265537.7	LARS2-201	protein_coding	LARS2	leucyl-tRNA synthetase 2, mitochondrial [Source:HGNC Symbol;Acc:HGNC:17095]	4102.54	4095.37	4098.72	4099.74	4099.2	4098.97	759.332	792.655	792.26	584.876	690.189	556.65	9.47	9.65	9.46	7.25	8.39	6.71	695.994	-0.360062	0.120489	-2.98833	0.00280505	0.0683407
ENST00000343307.4	B3GLCT-201	protein_coding	B3GLCT	beta 3-glucosyltransferase [Source:HGNC Symbol;Acc:HGNC:20207]	4075.54	4068.37	4071.72	4072.74	4072.2	4071.97	158.305	147.708	162.129	106.243	101.3	107.237	1.99	1.81	1.95	1.33	1.24	1.3	130.487	-0.572043	0.191404	-2.98867	0.00280191	0.0683407
ENST00000409614.1	SERF2-207	protein_coding	SERF2	small EDRK-rich factor 2 [Source:HGNC Symbol;Acc:HGNC:10757]	403.63	396.46	399.81	400.82	400.28	400.06	4625.47	3803.44	4080.78	5077.24	4823.39	5016.83	590.8	474.42	499.23	644.66	600.39	619.67	4571.19	0.253692	0.0848855	2.98864	0.00280222	0.0683407
ENST00000449653.5	COMT-209	protein_coding	COMT	catechol-O-methyltransferase [Source:HGNC Symbol;Acc:HGNC:2228]	856.54	849.37	852.72	853.74	853.2	852.97	950.369	842.922	1014.91	1113.27	1208.72	1454	56.96	49.32	58.25	66.32	70.6	84.25	1097.36	0.427548	0.143056	2.98868	0.00280181	0.0683407
ENST00000407418.7	CBX6-202	protein_coding	CBX6	chromobox 6 [Source:HGNC Symbol;Acc:HGNC:1556]	5943.54	5936.37	5939.72	5940.74	5940.2	5939.97	2689.22	2474.24	2644.14	2870.86	2947.17	2960.86	23.14	20.79	21.79	24.56	24.72	24.63	2764.41	0.168264	0.0563304	2.9871	0.00281641	0.0685478
ENST00000320640.10	ITFG1-201	protein_coding	ITFG1	integrin alpha FG-GAP repeat containing 1 [Source:HGNC Symbol;Acc:HGNC:30697]	3221.54	3214.37	3217.72	3218.74	3218.2	3217.97	682.258	884.204	890.061	569.827	648.314	573.846	10.84	13.72	13.54	8.99	10.04	8.81	708.085	-0.456152	0.152771	-2.98586	0.00282785	0.0687567
ENST00000261413.9	MRPS27-201	protein_coding	MRPS27	mitochondrial ribosomal protein S27 [Source:HGNC Symbol;Acc:HGNC:14512]	2606.54	2599.37	2602.72	2603.74	2603.2	2602.97	2501.28	2533.76	2816.51	2168.67	2266.38	2304.41	49.1	48.58	52.96	42.32	43.37	43.76	2431.83	-0.220673	0.0739225	-2.9852	0.00283394	0.068835
ENST00000295851.9	ABI2-204	protein_coding	ABI2	abl interactor 2 [Source:HGNC Symbol;Acc:HGNC:24011]	22030.5	22023.4	22026.7	22027.7	22027.2	22027	219.274	227.593	224.792	299.452	279.593	315.973	0.51	0.51	0.5	0.69	0.63	0.71	261.113	0.418442	0.140352	2.98138	0.0028695	0.0693658
ENST00000330752.12	HNRNPA1-201	protein_coding	HNRNPA1	heterogeneous nuclear ribonucleoprotein A1 [Source:HGNC Symbol;Acc:HGNC:5031]	1115.54	1108.37	1111.72	1112.74	1112.2	1111.97	6056.49	7369.47	7048.47	5828.02	5658.86	5762.59	278.35	330.79	310.26	266.27	253.51	256.11	6287.32	-0.246943	0.082807	-2.98216	0.00286226	0.0693658
ENST00000380071.7	RFC3-201	protein_coding	RFC3	replication factor C subunit 3 [Source:HGNC Symbol;Acc:HGNC:9971]	2223.54	2216.37	2219.72	2220.74	2220.2	2219.97	2313.02	2429.44	2561.67	2175.02	2074.57	1877.1	53.25	54.62	56.49	49.77	46.54	41.79	2238.47	-0.254861	0.0854863	-2.9813	0.00287025	0.0693658
ENST00000393085.3	MTPN-201	protein_coding	MTPN	myotrophin [Source:HGNC Symbol;Acc:HGNC:15667]	3559.54	3552.37	3555.72	3556.74	3556.2	3555.97	6429.79	7204.8	7507.36	6245.68	6065.8	5952.09	92.42	101.13	103.34	89.24	84.96	82.73	6567.59	-0.211217	0.0708353	-2.9818	0.00286559	0.0693658
ENST00000561421.5	FAH-213	protein_coding	FAH	fumarylacetoacetate hydrolase [Source:HGNC Symbol;Acc:HGNC:3579]	1370.54	1363.37	1366.72	1367.74	1367.2	1366.97	235.721	225.916	225.684	144.831	148.565	179.284	8.81	8.26	8.08	5.37	5.43	6.47	193.334	-0.533862	0.179058	-2.9815	0.00286844	0.0693658
ENST00000621016.4	CDH1-214	protein_coding	CDH1	cadherin 1 [Source:HGNC Symbol;Acc:HGNC:1748]	3125.54	3118.37	3121.72	3122.74	3122.2	3121.97	9207.05	10011.9	10179.3	8298.38	9070.98	8597.05	150.73	160.07	159.6	135.05	144.73	136.1	9227.45	-0.17935	0.0601802	-2.98022	0.00288042	0.0695417
ENST00000556029.5	TMPO-212	protein_coding	TMPO	thymopoietin [Source:HGNC Symbol;Acc:HGNC:11875]	4063.54	4056.37	4059.72	4060.74	4060.2	4059.97	4784.02	4761.61	4996.76	4527.68	4214.07	3982.51	60.22	58.55	60.24	56.66	51.7	48.48	4544.44	-0.1934	0.0649019	-2.97988	0.00288358	0.0695479
ENST00000233809.8	IGFBP2-201	protein_coding	IGFBP2	insulin like growth factor binding protein 2 [Source:HGNC Symbol;Acc:HGNC:5471]	1260.54	1253.37	1256.72	1257.74	1257.2	1256.97	845.373	711.806	872.666	957.993	1077.76	1126.47	34.38	28.26	33.99	38.7	42.72	44.28	932.012	0.378879	0.127207	2.97844	0.00289723	0.0698069
ENST00000420843.6	ARRB1-202	protein_coding	ARRB1	arrestin beta 1 [Source:HGNC Symbol;Acc:HGNC:711]	3157.54	3150.37	3153.72	3154.74	3154.2	3153.97	666.148	623.695	719.572	764.058	940.054	985.607	10.8	9.87	11.17	12.3	14.84	15.45	783.189	0.420148	0.141115	2.97735	0.00290756	0.0699855
ENST00000393931.7	JUP-203	protein_coding	JUP	junction plakoglobin [Source:HGNC Symbol;Acc:HGNC:6207]	3318.54	3311.37	3314.72	3315.74	3315.2	3314.97	3898.74	3491.59	4106.8	4236.7	4739.45	4914.93	60.1	52.57	60.64	64.94	71.22	73.28	4231.37	0.27253	0.0916036	2.9751	0.00292894	0.0704295
ENST00000343255.9	SRSF10-203	protein_coding	SRSF10	serine and arginine rich splicing factor 10 [Source:HGNC Symbol;Acc:HGNC:16713]	2738.54	2731.37	2734.72	2735.74	2735.2	2734.97	1795.17	1978.59	1909.7	1661.13	1676.15	1603.67	33.54	36.11	34.19	30.86	30.52	28.98	1770.73	-0.202226	0.0680095	-2.9735	0.00294424	0.0706559
ENST00000359591.8	LRP10-201	protein_coding	LRP10	LDL receptor related protein 10 [Source:HGNC Symbol;Acc:HGNC:14553]	6707.54	6700.37	6703.72	6704.74	6704.2	6703.97	3684.28	3390.42	3382.03	3787.44	4135.78	4025.85	28.09	25.24	24.7	28.7	30.73	29.68	3734.3	0.191954	0.0645546	2.97351	0.00294415	0.0706559
ENST00000591768.1	USP32-213	protein_coding	USP32	ubiquitin specific peptidase 32 [Source:HGNC Symbol;Acc:HGNC:19143]	560.57	553.4	556.75	557.76	557.22	557	225.962	204.132	242.494	293.753	384.875	308.667	20.74	18.3	21.31	26.75	34.36	27.39	276.647	0.547751	0.18424	2.97304	0.00294871	0.0706924
ENST00000358252.7	TNKS1BP1-201	protein_coding	TNKS1BP1	tankyrase 1 binding protein 1 [Source:HGNC Symbol;Acc:HGNC:19081]	5616.54	5609.37	5612.72	5613.74	5613.2	5612.97	2226.63	2263.53	2174.48	2380.39	2667.58	2617.87	20.27	20.13	18.97	21.54	23.67	23.05	2388.41	0.201976	0.0680972	2.96599	0.00301706	0.0722589
ENST00000359210.8	POLR3E-202	protein_coding	POLR3E	RNA polymerase III subunit E [Source:HGNC Symbol;Acc:HGNC:30347]	2290.54	2283.37	2286.72	2287.74	2287.2	2286.97	56.3086	38.3637	86.0851	200.657	93.1938	172.729	1.27	0.85	1.84	4.46	2.02	3.73	107.89	1.36542	0.460568	2.96464	0.00303033	0.0724154
ENST00000460450.1	TTL-202	protein_coding	TTL	tubulin tyrosine ligase [Source:HGNC Symbol;Acc:HGNC:21586]	3969.54	3962.37	3965.72	3966.74	3966.2	3965.97	857.69	934.752	996.178	776.968	757.722	748.204	11.05	11.76	12.29	9.95	9.52	9.33	845.252	-0.289224	0.0975654	-2.96441	0.00303265	0.0724154
ENST00000533961.1	RDX-215	protein_coding	RDX	radixin [Source:HGNC Symbol;Acc:HGNC:9944]	592.56	585.39	588.74	589.76	589.21	588.99	122.809	112.232	107.028	159.749	170.158	175.21	10.62	9.53	8.92	13.74	14.44	14.67	141.198	0.563233	0.189972	2.96482	0.00302864	0.0724154
ENST00000323055.10	PPP3CA-201	protein_coding	PPP3CA	protein phosphatase 3 catalytic subunit alpha [Source:HGNC Symbol;Acc:HGNC:9314]	4340.54	4333.37	4336.72	4337.74	4337.2	4336.97	676.185	701.29	718.714	817.76	841.465	979.867	7.97	8.07	8.11	9.58	9.66	11.17	789.213	0.334692	0.112993	2.96207	0.00305581	0.0728959
ENST00000307677.4	BCL2L1-201	protein_coding	BCL2L1	BCL2 like 1 [Source:HGNC Symbol;Acc:HGNC:992]	2431.54	2424.37	2427.72	2428.74	2428.2	2427.97	1079.79	1026.7	1065.61	1165.33	1300.66	1296.69	22.73	21.11	21.49	24.39	26.67	26.39	1155.8	0.245615	0.0829834	2.95981	0.00307829	0.073273
ENST00000377855.6	ACOT7-204	protein_coding	ACOT7	acyl-CoA thioesterase 7 [Source:HGNC Symbol;Acc:HGNC:24157]	1435.54	1428.37	1431.72	1432.74	1432.2	1431.97	84.8335	79.0609	58.51	111.576	168.824	134.258	3.02	2.75	1.99	3.95	5.89	4.62	106.177	0.89769	0.303319	2.95956	0.00308078	0.073273
ENST00000425248.5	COPG2-202	protein_coding	COPG2	coatomer protein complex subunit gamma 2 [Source:HGNC Symbol;Acc:HGNC:2237]	2955.54	2948.37	2951.72	2952.74	2952.2	2951.97	2000.08	2075.39	2193	1825.34	1857.14	1827.96	34.63	35.09	36.37	31.41	31.34	30.6	1963.15	-0.186691	0.0630801	-2.95959	0.0030805	0.073273
ENST00000260665.11	LRPPRC-201	protein_coding	LRPPRC	leucine rich pentatricopeptide repeat containing [Source:HGNC Symbol;Acc:HGNC:15714]	6156.54	6149.37	6152.72	6153.74	6153.2	6152.97	8371.1	8969.05	9456.7	7918.24	8087.85	7851.15	69.54	72.76	75.23	65.38	65.48	63.07	8442.35	-0.167901	0.0567535	-2.95843	0.00309211	0.0734485
ENST00000355628.9	FAM208A-201	protein_coding	FAM208A	family with sequence similarity 208 member A [Source:HGNC Symbol;Acc:HGNC:30314]	5060.54	5053.37	5056.72	5057.74	5057.2	5056.97	506.302	346.093	406.988	569.869	614.555	633.596	5.12	3.42	3.94	5.72	6.05	6.19	512.9	0.52803	0.178496	2.95821	0.00309428	0.0734485
ENST00000340370.10	DOCK7-202	protein_coding	DOCK7	dedicator of cytokinesis 7 [Source:HGNC Symbol;Acc:HGNC:19190]	6552.54	6545.37	6548.72	6549.74	6549.2	6548.97	110.044	145.402	147.081	265.088	174.237	251.309	0.86	1.11	1.1	2.06	1.32	1.9	182.194	0.783538	0.264969	2.95709	0.00310554	0.0735702
ENST00000429635.1	AMIGO2-202	protein_coding	AMIGO2	adhesion molecule with Ig like domain 2 [Source:HGNC Symbol;Acc:HGNC:24073]	2879.54	2872.37	2875.72	2876.74	2876.2	2875.97	1021.02	926.061	987.856	1149.28	1320.93	1141.15	18.14	16.07	16.81	20.3	22.87	19.61	1091.05	0.296125	0.100133	2.95731	0.00310339	0.0735702
ENST00000263268.10	MREG-201	protein_coding	MREG	melanoregulin [Source:HGNC Symbol;Acc:HGNC:25478]	1135.54	1128.37	1131.72	1132.74	1132.2	1131.97	162.42	99.4594	186.409	276.762	243.102	287.351	7.34	4.37	8.07	12.44	10.7	12.53	209.25	0.844941	0.28583	2.9561	0.00311558	0.0737353
ENST00000443963.5	EIF4A2-207	protein_coding	EIF4A2	eukaryotic translation initiation factor 4A2 [Source:HGNC Symbol;Acc:HGNC:3284]	1550.54	1543.37	1546.72	1547.74	1547.2	1546.97	167.911	180.676	157.974	63.3002	114.801	99.8744	5.55	5.82	4.99	2.09	3.7	3.18	130.756	-0.868224	0.293922	-2.95392	0.00313762	0.0741838
ENST00000383807.5	FANCD2-202	protein_coding	FANCD2	Fanconi anemia complementation group D2 [Source:HGNC Symbol;Acc:HGNC:3585]	4923.54	4916.37	4919.72	4920.74	4920.2	4919.97	1331.03	1449.79	1456.63	1240.61	1204.8	1193.52	13.83	14.71	14.49	12.81	12.2	11.99	1312.73	-0.219566	0.0743797	-2.95196	0.00315761	0.0743803
ENST00000420353.6	ATF7-201	protein_coding	ATF7	activating transcription factor 7 [Source:HGNC Symbol;Acc:HGNC:792]	6501.54	6494.37	6497.72	6498.74	6498.2	6497.97	1032.44	989.641	1123.17	894	803.653	878.352	8.12	7.6	8.46	6.99	6.16	6.68	953.542	-0.287373	0.0973251	-2.95271	0.00315001	0.0743803
ENST00000470935.1	TTF2-205	protein_coding	TTF2	transcription termination factor 2 [Source:HGNC Symbol;Acc:HGNC:12398]	670.55	663.38	666.73	667.75	667.2	666.98	302.778	343.244	340.293	261.637	225.531	239.066	23.17	25.69	24.98	19.93	16.81	17.68	285.425	-0.439087	0.148735	-2.95215	0.00315573	0.0743803
ENST00000564595.6	ALDOA-213	protein_coding	ALDOA	aldolase, fructose-bisphosphate A [Source:HGNC Symbol;Acc:HGNC:414]	1484.54	1477.37	1480.72	1481.74	1481.2	1480.97	169.681	121.969	137.079	430.219	189.084	273.427	5.85	4.12	4.53	14.74	6.34	9.12	220.243	1.05842	0.358558	2.95189	0.00315833	0.0743803
ENST00000381967.8	PGM2-201	protein_coding	PGM2	phosphoglucomutase 2 [Source:HGNC Symbol;Acc:HGNC:8906]	3085.54	3078.37	3081.72	3082.74	3082.2	3081.97	1160.59	1247.42	1332.17	1014.09	1076.47	1032.27	19.24	20.2	21.15	16.71	17.41	16.55	1143.84	-0.261435	0.0885797	-2.95141	0.00316332	0.0744248
ENST00000316356.8	SYTL2-201	protein_coding	SYTL2	synaptotagmin like 2 [Source:HGNC Symbol;Acc:HGNC:15585]	4114.54	4107.37	4110.72	4111.74	4111.2	4110.97	3414.77	3541.57	3748.19	3903.11	4050.64	4048.81	42.45	42.99	44.63	48.23	49.08	48.68	3784.51	0.164826	0.0558644	2.95047	0.00317287	0.0745764
ENST00000371989.7	SURF4-202	protein_coding	SURF4	surfeit 4 [Source:HGNC Symbol;Acc:HGNC:11476]	2805.54	2798.37	2801.72	2802.74	2802.2	2801.97	7847.84	7915.21	8294.01	8482.76	8966.94	9328.93	143.14	140.99	144.89	153.81	159.41	164.55	8472.62	0.154752	0.0524649	2.94963	0.00318159	0.0747083
ENST00000483530.6	RAB3IP-207	protein_coding	RAB3IP	RAB3A interacting protein [Source:HGNC Symbol;Acc:HGNC:16508]	1576.54	1569.37	1572.72	1573.74	1573.2	1572.97	298.321	264.228	249.916	211.36	133.71	145.718	9.7	8.38	7.77	6.84	4.23	4.58	217.209	-0.725949	0.246331	-2.94705	0.00320821	0.0752597
ENST00000622786.4	DDX24-210	protein_coding	DDX24	DEAD-box helicase 24 [Source:HGNC Symbol;Acc:HGNC:13266]	1551.54	1544.37	1547.72	1548.74	1548.2	1547.97	1171.81	1119.06	1185.22	1422.65	1280.37	1365.5	38.7	36.1	37.47	46.68	41.2	43.6	1257.43	0.227524	0.0772222	2.94636	0.00321543	0.0753554
ENST00000329819.4	MRPL11-202	protein_coding	MRPL11	mitochondrial ribosomal protein L11 [Source:HGNC Symbol;Acc:HGNC:14042]	743.55	736.37	739.73	740.74	740.2	739.97	563.985	532.134	627.873	441.827	406.5	471.579	38.93	35.86	41.54	30.3	27.4	31.5	507.316	-0.383536	0.130215	-2.9454	0.00322535	0.0755141
ENST00000348616.8	CDH26-202	protein_coding	CDH26	cadherin 26 [Source:HGNC Symbol;Acc:HGNC:15902]	3003.54	2996.37	2999.72	3000.74	3000.2	2999.97	203.857	231.221	237.352	137.357	170.182	153.899	3.47	3.85	3.87	2.32	2.83	2.54	188.978	-0.546198	0.185477	-2.94483	0.00323129	0.075563
ENST00000548065.5	PRKAG1-206	protein_coding	PRKAG1	protein kinase AMP-activated non-catalytic subunit gamma 1 [Source:HGNC Symbol;Acc:HGNC:9385]	1892.54	1885.37	1888.72	1889.74	1889.2	1888.97	251.075	185.112	269.965	79.3996	125.608	154.721	6.8	4.89	6.99	2.14	3.31	4.06	177.647	-0.971524	0.329934	-2.9446	0.00323374	0.075563
ENST00000338435.8	GLS-202	protein_coding	GLS	glutaminase [Source:HGNC Symbol;Acc:HGNC:4331]	4296.54	4289.37	4292.72	4293.74	4293.2	4292.97	960.605	1053.07	1079.74	878.93	871.179	812.054	11.44	12.24	12.31	10.4	10.11	9.35	942.597	-0.273313	0.0928294	-2.94425	0.00323735	0.0755739
ENST00000300933.8	TPM4-201	protein_coding	TPM4	tropomyosin 4 [Source:HGNC Symbol;Acc:HGNC:12013]	2487.54	2480.37	2483.72	2484.74	2484.2	2483.97	19781	21278.9	22196.3	18965.2	18733.4	19282.6	406.99	427.57	437.39	387.88	375.66	383.67	20039.6	-0.150632	0.0512058	-2.9417	0.0032642	0.0761266
ENST00000292211.4	UBE2Q1-201	protein_coding	UBE2Q1	ubiquitin conjugating enzyme E2 Q1 [Source:HGNC Symbol;Acc:HGNC:15698]	3031.54	3024.37	3027.72	3028.74	3028.2	3027.97	1840.99	1880.2	2000.77	2254.6	2107.01	2178.33	31.07	30.99	32.34	37.83	34.66	35.55	2043.65	0.192885	0.0655948	2.94055	0.00327629	0.0761864
ENST00000330899.4	DNAJA1-201	protein_coding	DNAJA1	DnaJ heat shock protein family (Hsp40) member A1 [Source:HGNC Symbol;Acc:HGNC:5229]	2202.54	2195.37	2198.72	2199.74	2199.2	2198.97	10128.7	11707.3	11893.2	12555.4	13305.1	13316.6	235.4	265.73	264.74	290.07	301.4	299.3	12151	0.216078	0.0734705	2.94101	0.00327142	0.0761864
ENST00000476111.5	USP22-204	protein_coding	USP22	ubiquitin specific peptidase 22 [Source:HGNC Symbol;Acc:HGNC:12621]	394.63	387.47	390.82	391.83	391.29	391.06	110.026	156.946	126.297	76.0801	83.7194	60.5931	14.35	20.05	15.75	9.82	10.67	7.68	102.277	-0.84089	0.285953	-2.94066	0.00327515	0.0761864
ENST00000548514.1	OAS3-205	protein_coding	OAS3	2'-5'-oligoadenylate synthetase 3 [Source:HGNC Symbol;Acc:HGNC:8088]	1213.54	1206.37	1209.72	1210.74	1210.2	1209.97	170.485	164.977	173.031	239.225	260.661	216.945	7.19	6.8	7	10.05	10.72	8.86	204.221	0.48934	0.166518	2.93866	0.00329634	0.0765785
ENST00000307259.8	PLPP1-202	protein_coding	PLPP1	phospholipid phosphatase 1 [Source:HGNC Symbol;Acc:HGNC:9228]	1418.54	1411.37	1414.72	1415.74	1415.2	1414.97	88.4029	127.631	99.4673	158.781	195.836	165.367	3.19	4.49	3.45	5.69	6.9	5.79	139.247	0.723084	0.246147	2.93761	0.00330754	0.0766161
ENST00000353047.10	CTSB-202	protein_coding	CTSB	cathepsin B [Source:HGNC Symbol;Acc:HGNC:2527]	3696.54	3689.37	3692.72	3693.74	3693.2	3692.97	1380.8	1427.6	1354.71	1065.64	1210.19	1214.81	19.11	19.3	17.96	14.66	16.32	16.26	1275.62	-0.253564	0.0863003	-2.93816	0.00330169	0.0766161
ENST00000482054.1	CTSL-205	protein_coding	CTSL	cathepsin L [Source:HGNC Symbol;Acc:HGNC:2537]	729.55	722.37	725.73	726.74	726.2	725.97	199.56	189.096	219.047	292.759	260.646	280.001	14.02	12.98	14.77	20.47	17.88	19.04	240.185	0.454826	0.154824	2.93769	0.00330664	0.0766161
ENST00000263635.7	TANC1-201	protein_coding	TANC1	tetratricopeptide repeat, ankyrin repeat and coiled-coil containing 1 [Source:HGNC Symbol;Acc:HGNC:29364]	7291.54	7284.37	7287.72	7288.74	7288.2	7287.97	806.136	813.754	801.422	633.212	696.951	692.53	5.65	5.57	5.38	4.41	4.76	4.69	740.668	-0.259424	0.088369	-2.93569	0.00332808	0.076886
ENST00000409552.4	CLEC16A-202	protein_coding	CLEC16A	C-type lectin domain containing 16A [Source:HGNC Symbol;Acc:HGNC:29013]	3186.54	3179.37	3182.72	3183.74	3183.2	3182.97	283.451	258.272	232.336	182.43	170.182	191.555	4.55	4.05	3.58	2.91	2.66	2.97	219.704	-0.504129	0.171717	-2.9358	0.00332685	0.076886
ENST00000523589.5	CLU-216	protein_coding	CLU	clusterin [Source:HGNC Symbol;Acc:HGNC:2095]	699.55	692.38	695.73	696.74	696.2	695.97	390.132	417.91	363.693	445.02	663.091	735.213	28.62	29.98	25.58	32.48	47.48	52.22	502.51	0.654996	0.22312	2.93562	0.0033288	0.076886
ENST00000501194.2	AC106038.1-201	antisense_RNA	AC106038.1		3294.54	3287.37	3290.72	3291.74	3291.2	3290.97	245.011	286.457	254.064	174.919	205.299	176.001	3.81	4.35	3.78	2.69	3.1	2.64	223.625	-0.500776	0.170624	-2.93497	0.00333578	0.0769732
ENST00000256722.9	CMPK2-201	protein_coding	CMPK2	cytidine/uridine monophosphate kinase 2 [Source:HGNC Symbol;Acc:HGNC:27015]	2705.54	2698.37	2701.72	2702.74	2702.2	2701.97	152.873	76.7081	88.5902	240.37	225.558	177.64	2.89	1.42	1.61	4.52	4.17	3.25	160.29	1.01193	0.345137	2.93197	0.0033682	0.077572
ENST00000624624.1	AP001972.5-201	TEC	AP001972.5		2159.54	2152.37	2155.72	2156.74	2156.2	2155.97	428.979	428.813	502.307	539.725	632.095	714.659	10.17	9.93	11.4	12.72	14.6	16.38	541.096	0.472332	0.161084	2.93221	0.00336558	0.077572
ENST00000406256.7	GDPD3-202	protein_coding	GDPD3	glycerophosphodiester phosphodiesterase domain containing 3 [Source:HGNC Symbol;Acc:HGNC:28638]	1218.54	1211.37	1214.72	1215.74	1215.2	1214.97	69.6229	72.3178	68.5434	101.912	124.253	113.794	2.92	2.99	2.78	4.27	5.07	4.63	91.7405	0.690327	0.235555	2.93064	0.0033826	0.0778289
ENST00000421999.7	CMSS1-201	protein_coding	CMSS1	cms1 ribosomal small subunit homolog (yeast) [Source:HGNC Symbol;Acc:HGNC:28666]	4151.54	4144.37	4147.72	4148.74	4148.2	4147.97	251.324	258.202	280.801	173.853	163.43	208.744	3.1	3.11	3.32	2.13	1.96	2.48	222.726	-0.527073	0.179926	-2.92938	0.00339634	0.0778838
ENST00000428963.6	CENPN-204	protein_coding	CENPN	centromere protein N [Source:HGNC Symbol;Acc:HGNC:30873]	792.54	785.37	788.72	789.74	789.2	788.97	253.111	336.157	344.445	220.925	193.122	210.406	16.39	21.28	21.37	14.21	12.23	13.19	259.694	-0.577892	0.19724	-2.92989	0.00339082	0.0778838
ENST00000494400.5	FAF1-205	protein_coding	FAF1	Fas associated factor 1 [Source:HGNC Symbol;Acc:HGNC:3578]	1948.54	1941.37	1944.72	1945.74	1945.2	1944.97	342.23	338.6	342.678	236.055	284.981	216.118	8.99	8.68	8.62	6.18	7.29	5.49	293.444	-0.480876	0.164164	-2.92924	0.00339797	0.0778838
ENST00000549068.5	PRR13-205	protein_coding	PRR13	proline rich 13 [Source:HGNC Symbol;Acc:HGNC:24528]	576.57	569.39	572.75	573.76	573.22	572.99	390.606	265.325	324.433	159.746	113.437	231.706	34.81	23.08	27.74	14.18	9.86	19.98	247.542	-0.951448	0.324796	-2.92937	0.00339652	0.0778838
ENST00000370995.6	SERBP1-204	protein_coding	SERBP1	SERPINE1 mRNA binding protein 1 [Source:HGNC Symbol;Acc:HGNC:17860]	3303.54	3296.37	3299.72	3300.74	3300.2	3299.97	3854.01	4151.36	4583.18	3675.45	3561.68	3446.34	59.69	62.8	67.99	56.58	53.76	51.62	3878.67	-0.237161	0.0809835	-2.92851	0.00340592	0.0779174
ENST00000602318.5	LAMTOR5-206	protein_coding	LAMTOR5	late endosomal/lysosomal adaptor, MAPK and MTOR activator 5 [Source:HGNC Symbol;Acc:HGNC:17955]	455.6	448.43	451.78	452.8	452.25	452.03	1393.81	1373.23	1435.95	1593.74	1550.24	1606.46	157.58	151.57	155.51	179.14	170.79	175.58	1492.24	0.176928	0.0604113	2.92872	0.00340364	0.0779174
ENST00000272102.9	ARF1-201	protein_coding	ARF1	ADP ribosylation factor 1 [Source:HGNC Symbol;Acc:HGNC:652]	1709.54	1702.37	1705.72	1706.74	1706.2	1705.97	11227.4	10692.5	10864	11612.3	11622	12055.2	336.34	312.81	311.7	345.82	339.32	349.23	11345.6	0.106455	0.0363662	2.9273	0.00341922	0.078147
ENST00000540918.2	TTC39C-203	protein_coding	TTC39C	tetratricopeptide repeat domain 39C [Source:HGNC Symbol;Acc:HGNC:26595]	3938.54	3931.37	3934.72	3935.74	3935.2	3934.97	254.89	308.955	322.588	209.266	214.755	204.651	3.31	3.91	4.02	2.7	2.71	2.57	252.518	-0.496656	0.169764	-2.92557	0.00343824	0.0785071
ENST00000282388.3	ZFP36L2-201	protein_coding	ZFP36L2	ZFP36 ring finger protein like 2 [Source:HGNC Symbol;Acc:HGNC:1108]	3517.54	3510.37	3513.72	3514.74	3514.2	3513.97	783.37	824.35	863.309	670.711	702.342	690.086	11.39	11.71	12.03	9.7	9.96	9.71	755.695	-0.261099	0.0892623	-2.92508	0.00344371	0.0785571
ENST00000579456.5	CLTC-210	protein_coding	CLTC	clathrin heavy chain [Source:HGNC Symbol;Acc:HGNC:2092]	2122.54	2115.37	2118.72	2119.74	2119.2	2118.97	2148.41	1305.66	1984.16	2447.53	2698.56	2865.19	51.82	30.76	45.84	58.68	63.44	66.84	2241.58	0.558287	0.190909	2.92437	0.00345156	0.0786615
ENST00000354886.6	SLC38A6-202	protein_coding	SLC38A6	solute carrier family 38 member 6 [Source:HGNC Symbol;Acc:HGNC:19863]	1551.54	1544.37	1547.72	1548.74	1548.2	1547.97	110.75	136.636	91.9425	162.006	201.24	195.656	3.67	4.42	2.91	5.3	6.49	6.25	149.705	0.724942	0.247997	2.9232	0.00346459	0.0788836
ENST00000453734.1	USP34-205	protein_coding	USP34	ubiquitin specific peptidase 34 [Source:HGNC Symbol;Acc:HGNC:20066]	2529.54	2522.37	2525.72	2526.74	2526.2	2525.97	90.2855	148.918	195.569	52.58	62.1295	78.5873	1.83	2.95	3.79	1.06	1.22	1.53	104.678	-1.16569	0.398873	-2.92245	0.00347294	0.0789345
ENST00000576370.5	COX11-209	protein_coding	COX11	COX11, cytochrome c oxidase copper chaperone [Source:HGNC Symbol;Acc:HGNC:2261]	2484.54	2477.37	2480.72	2481.74	2481.2	2480.97	126.039	94.7688	183.033	310.113	279.582	203.017	2.6	1.91	3.62	6.36	5.62	4.04	199.426	0.967258	0.33098	2.9224	0.00347341	0.0789345
ENST00000614012.4	MR1-208	protein_coding	MR1	major histocompatibility complex, class I-related [Source:HGNC Symbol;Acc:HGNC:4975]	7681.54	7674.37	7677.72	7678.74	7678.2	7677.97	257.684	286.272	268.254	369.197	409.256	329.893	1.72	1.86	1.71	2.44	2.65	2.12	320.092	0.445364	0.15245	2.92137	0.00348493	0.0791214
ENST00000547717.1	AC023509.1-201	processed_transcript	AC023509.1		1392.54	1385.37	1388.72	1389.74	1389.2	1388.97	193.763	153.616	203.115	249.97	267.417	311.905	7.12	5.52	7.16	9.14	9.61	11.09	229.965	0.589893	0.201982	2.92052	0.00349448	0.0792633
ENST00000351829.8	AKR1A1-201	protein_coding	AKR1A1	aldo-keto reductase family 1 member A1 [Source:HGNC Symbol;Acc:HGNC:380]	987.54	980.37	983.72	984.74	984.2	983.97	569.101	748.577	691.335	810.905	930.526	1002.06	29.58	37.98	34.39	41.87	47.12	50.31	792.084	0.451216	0.15471	2.91653	0.00353947	0.0800568
ENST00000368406.2	EFNA1-201	protein_coding	EFNA1	ephrin A1 [Source:HGNC Symbol;Acc:HGNC:3221]	1265.54	1258.37	1261.72	1262.74	1262.2	1261.97	717.727	699.369	627.751	847.498	885.981	796.553	29.07	27.65	24.35	34.11	34.96	31.21	762.48	0.306064	0.104932	2.91679	0.00353649	0.0800568
ENST00000455785.6	STMN1-206	protein_coding	STMN1	stathmin 1 [Source:HGNC Symbol;Acc:HGNC:6510]	1325.54	1318.37	1321.72	1322.74	1322.2	1321.97	3398.91	3167.64	3431.27	3017.81	2951.03	2688.46	131.4	119.61	127.05	115.99	111.2	100.49	3109.19	-0.209285	0.0717451	-2.91706	0.00353346	0.0800568
ENST00000326134.9	MROH1-201	protein_coding	MROH1	maestro heat like repeat family member 1 [Source:HGNC Symbol;Acc:HGNC:26958]	5004.54	4997.37	5000.72	5001.74	5001.2	5000.97	396.272	343.841	388.602	413.181	790.142	771.12	4.05	3.43	3.8	4.2	7.87	7.62	517.193	0.806111	0.276509	2.91532	0.00355329	0.0801086
ENST00000427003.7	RNF213-203	protein_coding	RNF213	ring finger protein 213 [Source:HGNC Symbol;Acc:HGNC:14539]	3373.54	3366.37	3369.72	3370.74	3370.2	3369.97	955.028	867.242	856.627	1177.22	1162.91	1003.61	14.49	12.84	12.44	17.74	17.18	14.72	1003.77	0.317647	0.108947	2.91561	0.00354998	0.0801086
ENST00000430570.5	CPNE1-212	protein_coding	CPNE1	copine 1 [Source:HGNC Symbol;Acc:HGNC:2314]	1153.54	1146.37	1149.72	1150.74	1150.2	1149.97	150.825	113.016	110.34	185.582	244.453	189.111	6.7	4.92	4.69	8.18	10.6	8.14	165.555	0.721354	0.247449	2.91516	0.00355511	0.0801086
ENST00000563192.1	SNHG19-201	lincRNA	SNHG19	small nucleolar RNA host gene 19 [Source:HGNC Symbol;Acc:HGNC:49574]	164.62	157.99	161.01	161.97	161.42	161.29	336.072	312.969	333.333	229.915	207.946	266.992	106.44	96.81	101.11	72.39	64.19	81.77	281.204	-0.473134	0.162286	-2.91543	0.00355201	0.0801086
ENST00000584350.1	AMZ2-214	protein_coding	AMZ2	archaelysin family metallopeptidase 2 [Source:HGNC Symbol;Acc:HGNC:28041]	666.55	659.38	662.73	663.75	663.2	662.98	133.575	150.67	78.5936	203.733	236.335	228.423	10.33	11.31	5.82	15.61	17.78	17.03	171.888	0.885833	0.303999	2.91393	0.00356909	0.080348
ENST00000253413.9	ATP6V1E1-201	protein_coding	ATP6V1E1	ATPase H+ transporting V1 subunit E1 [Source:HGNC Symbol;Acc:HGNC:857]	1223.54	1216.37	1219.72	1220.74	1220.2	1219.97	2818.87	2828.27	2986.65	3159.29	3487.19	3196.86	118.08	115.7	119.84	131.56	142.38	129.49	3079.52	0.187644	0.0644045	2.91352	0.00357378	0.0803783
ENST00000418572.6	STAT2-202	protein_coding	STAT2	signal transducer and activator of transcription 2 [Source:HGNC Symbol;Acc:HGNC:11363]	1369.54	1362.37	1365.72	1366.74	1366.2	1365.97	245.542	216.88	220.669	318.629	359.257	284.072	9.2	7.91	7.89	11.86	13.12	10.29	274.175	0.488239	0.167699	2.9114	0.00359816	0.0808508
ENST00000368921.4	MLLT11-201	protein_coding	MLLT11	MLLT11, transcription factor 7 cofactor [Source:HGNC Symbol;Acc:HGNC:16997]	3896.54	3889.37	3892.72	3893.74	3893.2	3892.97	234.318	230.027	193.052	296.191	317.405	292.242	3.07	2.96	2.42	3.87	4.07	3.71	260.539	0.462702	0.15895	2.911	0.00360278	0.0808789
ENST00000417253.7	HELZ-202	protein_coding	HELZ	helicase with zinc finger [Source:HGNC Symbol;Acc:HGNC:16878]	1693.54	1686.37	1689.72	1690.74	1690.2	1689.97	134.89	142.253	239.046	107.292	56.7257	64.6723	4.09	4.21	6.92	3.22	1.68	1.89	124.147	-1.17454	0.403548	-2.91054	0.00360804	0.0809089
ENST00000474626.5	RPS18-232	protein_coding	RPS18	ribosomal protein S18 [Source:HGNC Symbol;Acc:HGNC:10401]	460.6	453.43	456.78	457.79	457.25	457.03	2922.89	2822.29	2710.46	2351.57	2422.58	2599.63	326.76	308.16	290.24	261.36	263.95	281.04	2638.24	-0.196273	0.067441	-2.9103	0.00361086	0.0809089
ENST00000524553.5	CFL1-202	protein_coding	CFL1	cofilin 1 [Source:HGNC Symbol;Acc:HGNC:1874]	681.55	674.38	677.73	678.75	678.2	677.98	99.7471	101.944	54.346	168.351	212.027	141.638	7.49	7.48	3.93	12.62	15.57	10.35	129.676	1.0284	0.353437	2.90972	0.00361749	0.0809818
ENST00000358100.6	AKAP9-202	protein_coding	AKAP9	A-kinase anchoring protein 9 [Source:HGNC Symbol;Acc:HGNC:379]	10130.5	10123.4	10126.7	10127.7	10127.2	10127	876.04	1123.54	968.545	716.943	779.345	788.301	4.42	5.54	4.68	3.6	3.84	3.85	875.453	-0.376133	0.129292	-2.90918	0.00362378	0.081047
ENST00000261735.3	ERP29-201	protein_coding	ERP29	endoplasmic reticulum protein 29 [Source:HGNC Symbol;Acc:HGNC:13799]	1556.54	1549.37	1552.72	1553.74	1553.2	1552.97	3727.12	3886.75	4065.53	4194.99	4435.38	4529.55	122.66	124.91	128.13	137.23	142.26	144.14	4139.89	0.172276	0.0592601	2.90712	0.00364772	0.0814563
ENST00000492135.5	NOP56-216	protein_coding	NOP56	NOP56 ribonucleoprotein [Source:HGNC Symbol;Acc:HGNC:15911]	964.54	957.37	960.72	961.74	961.2	960.97	1217.49	1190.82	1235.55	1055.45	1060.18	920.196	64.77	61.87	62.93	55.81	54.97	47.31	1113.28	-0.266576	0.0917006	-2.90702	0.00364887	0.0814563
ENST00000371778.5	FAF1-201	protein_coding	FAF1	Fas associated factor 1 [Source:HGNC Symbol;Acc:HGNC:3578]	1464.54	1457.37	1460.72	1461.74	1461.2	1460.97	560.821	503.705	554.171	457.038	402.478	415.054	19.62	17.19	18.56	15.91	13.74	14.03	482.211	-0.345553	0.118889	-2.90653	0.00365464	0.0815093
ENST00000396777.7	ARFIP2-202	protein_coding	ARFIP2	ADP ribosylation factor interacting protein 2 [Source:HGNC Symbol;Acc:HGNC:17160]	1689.54	1682.37	1685.72	1686.74	1686.2	1685.97	981.746	986.745	1065.68	1151.25	1270.92	1182.11	29.77	29.2	30.93	34.69	37.56	34.66	1106.41	0.246076	0.0846815	2.9059	0.00366199	0.0815974
ENST00000404249.7	CDK11A-208	protein_coding	CDK11A	cyclin dependent kinase 11A [Source:HGNC Symbol;Acc:HGNC:1730]	2270.54	2263.37	2266.72	2267.74	2267.2	2266.97	460.295	472.783	462.185	688.884	575.37	555.845	10.37	10.42	9.98	15.44	12.63	12.11	535.894	0.383294	0.131921	2.90548	0.00366692	0.0816316
ENST00000452606.2	RPL32-207	protein_coding	RPL32	ribosomal protein L32 [Source:HGNC Symbol;Acc:HGNC:10336]	452.6	445.43	448.78	449.8	449.25	449.03	9375.12	10342.4	10789.4	8534.51	9098.86	9051.68	1066.88	1149.33	1175.93	965.38	1009.18	996.09	9531.98	-0.193117	0.0664773	-2.90501	0.00367245	0.0816788
ENST00000570965.5	TOM1L1-207	protein_coding	TOM1L1	target of myb1 like 1 membrane trafficking protein [Source:HGNC Symbol;Acc:HGNC:11983]	847.54	840.37	843.72	844.74	844.2	843.97	57.9469	67.8895	64.3725	128.701	91.8353	107.249	3.49	4.04	3.72	7.74	5.43	6.26	86.3323	0.790496	0.272199	2.90412	0.00368291	0.0818355
ENST00000374168.6	RPS6KA1-204	protein_coding	RPS6KA1	ribosomal protein S6 kinase A1 [Source:HGNC Symbol;Acc:HGNC:10430]	3007.54	3000.37	3003.72	3004.74	3004.2	3003.97	900.368	860.591	829.895	1072.03	983.273	1013.44	15.31	14.29	13.53	18.12	16.31	16.68	943.267	0.245102	0.084411	2.90367	0.00368814	0.081876
ENST00000265361.7	SEMA3C-201	protein_coding	SEMA3C	semaphorin 3C [Source:HGNC Symbol;Acc:HGNC:10725]	4995.54	4988.37	4991.72	4992.74	4992.2	4991.97	6914.63	8760.62	8204.11	6406.99	6946.5	6036.35	70.79	87.59	80.45	65.21	69.32	59.77	7211.53	-0.300655	0.103571	-2.90289	0.00369735	0.0820046
ENST00000355893.9	MLF1-201	protein_coding	MLF1	myeloid leukemia factor 1 [Source:HGNC Symbol;Acc:HGNC:7125]	2024.54	2017.37	2020.72	2021.74	2021.2	2020.97	169.786	200.888	197.248	96.5692	144.517	109.696	4.3	4.96	4.77	2.44	3.55	2.68	153.117	-0.701745	0.241828	-2.90183	0.00370987	0.0821305
ENST00000356406.9	ACOX3-201	protein_coding	ACOX3	acyl-CoA oxidase 3, pristanoyl [Source:HGNC Symbol;Acc:HGNC:121]	2681.54	2674.37	2677.72	2678.74	2678.2	2677.97	347.76	410.619	412.028	468.934	556.465	537.012	6.64	7.65	7.53	8.89	10.34	9.91	455.47	0.416836	0.143636	2.90203	0.0037075	0.0821305
ENST00000496303.5	AP5Z1-207	protein_coding	AP5Z1	adaptor related protein complex 5 zeta 1 subunit [Source:HGNC Symbol;Acc:HGNC:22197]	5481.54	5474.37	5477.72	5478.74	5478.2	5477.97	843.582	712.437	747.115	956.23	1003.55	907.825	7.87	6.49	6.68	8.86	9.13	8.19	861.79	0.313549	0.108067	2.90142	0.00371471	0.0821619
ENST00000532881.5	SSH3-210	protein_coding	SSH3	slingshot protein phosphatase 3 [Source:HGNC Symbol;Acc:HGNC:30581]	2408.54	2401.37	2404.72	2405.74	2405.2	2404.97	573.854	530.279	441.287	689.969	642.904	739.214	12.2	11.01	8.98	14.58	13.31	15.19	602.918	0.425672	0.146773	2.90021	0.00372918	0.082406
ENST00000381223.9	ZBED1-203	protein_coding	ZBED1	zinc finger BED-type containing 1 [Source:HGNC Symbol;Acc:HGNC:447]	4331.54	4324.37	4327.72	4328.74	4328.2	4327.97	341.67	360.793	299.186	407.807	694.242	510.808	4.04	4.17	3.39	4.78	7.99	5.83	435.751	0.686038	0.236618	2.89935	0.00373933	0.0825543
ENST00000316045.9	ZNF518A-201	protein_coding	ZNF518A	zinc finger protein 518A [Source:HGNC Symbol;Acc:HGNC:29009]	7098.54	7091.37	7094.72	7095.74	7095.2	7094.97	178.94	175.827	272.434	110.544	94.5475	35.1995	1.29	1.24	1.88	0.8	0.66	0.25	144.582	-1.39182	0.480284	-2.89791	0.00375661	0.0828595
ENST00000388825.8	GPX3-201	protein_coding	GPX3	glutathione peroxidase 3 [Source:HGNC Symbol;Acc:HGNC:4555]	1457.54	1450.37	1453.72	1454.74	1454.2	1453.97	765.315	818.812	917.768	1029.94	1077.78	1512.86	26.89	28.12	30.9	35.97	36.93	51.43	1020.41	0.534503	0.184488	2.89723	0.00376476	0.0829631
ENST00000309784.8	TRIM59-201	protein_coding	TRIM59	tripartite motif containing 59 [Source:HGNC Symbol;Acc:HGNC:30834]	3688.54	3681.37	3684.72	3685.74	3685.2	3684.97	445.361	479.25	495.586	383.114	384.938	349.545	6.18	6.5	6.58	5.28	5.2	4.69	422.965	-0.348709	0.120454	-2.89496	0.00379209	0.0834886
ENST00000382125.8	EIPR1-201	protein_coding	EIPR1	EARP complex and GARP complex interacting protein 1 [Source:HGNC Symbol;Acc:HGNC:12383]	1587.54	1580.37	1583.72	1584.74	1584.2	1583.97	944.996	847.998	906.883	751.027	671.251	770.341	30.5	26.74	28.02	24.1	21.09	24.05	815.416	-0.298228	0.103074	-2.89336	0.00381149	0.0837619
ENST00000573618.5	RSL1D1-209	protein_coding	RSL1D1	ribosomal L1 domain containing 1 [Source:HGNC Symbol;Acc:HGNC:24534]	531.58	524.4	527.76	528.77	528.23	528	76.4806	119.122	131.285	206.899	160.7	270.192	7.38	11.28	12.18	19.95	15.12	25.33	160.78	0.968798	0.334818	2.89351	0.00380968	0.0837619
ENST00000259365.8	TMOD1-201	protein_coding	TMOD1	tropomodulin 1 [Source:HGNC Symbol;Acc:HGNC:11871]	3164.54	3157.37	3160.72	3161.74	3161.2	3160.97	274.507	228.951	352.682	188.868	70.2339	121.973	4.44	3.62	5.45	3.03	1.1	1.9	206.203	-1.16513	0.402832	-2.89234	0.00382382	0.0838027
ENST00000367303.8	RMND1-202	protein_coding	RMND1	required for meiotic nuclear division 1 homolog [Source:HGNC Symbol;Acc:HGNC:21176]	1675.54	1668.37	1671.72	1672.74	1672.2	1671.97	870.067	921.28	955.35	784.304	772.549	765.426	26.61	27.52	27.96	23.83	23.04	22.63	844.829	-0.242579	0.0838603	-2.89266	0.00381998	0.0838027
ENST00000429656.1	AL671277.1-201	unprocessed_pseudogene	AL671277.1		814.54	807.37	810.72	811.74	811.2	810.97	98.939	79.2186	69.3897	164.088	120.196	143.272	6.23	4.84	4.18	10.28	7.37	8.71	112.517	0.791198	0.273529	2.89255	0.00382123	0.0838027
ENST00000265857.7	GET4-201	protein_coding	GET4	golgi to ER traffic protein 4 [Source:HGNC Symbol;Acc:HGNC:21690]	1911.54	1904.37	1907.72	1908.74	1908.2	1907.97	2155.17	1915.42	2144.67	2322.98	2432.47	2455.89	57.73	50.1	55.02	61.84	63.49	63.61	2237.77	0.213424	0.0737982	2.89199	0.00382812	0.0838204
ENST00000377086.5	KIF1B-204	protein_coding	KIF1B	kinesin family member 1B [Source:HGNC Symbol;Acc:HGNC:16636]	10490.5	10483.4	10486.7	10487.7	10487.2	10487	1704.67	1825.59	1944.61	2085.36	2112.47	2144.7	8.31	8.69	9.08	10.1	10.03	10.11	1969.57	0.212207	0.0734075	2.8908	0.00384261	0.0839281
ENST00000479970.1	SULF2-210	protein_coding	SULF2	sulfatase 2 [Source:HGNC Symbol;Acc:HGNC:20392]	1140.54	1133.37	1136.72	1137.74	1137.2	1136.97	583.648	927.897	717.213	537.434	474.049	468.276	26.24	40.73	30.86	24.02	20.78	20.34	618.086	-0.589621	0.203951	-2.89099	0.00384025	0.0839281
ENST00000496459.2	RBMX-205	protein_coding	RBMX	RNA binding motif protein, X-linked [Source:HGNC Symbol;Acc:HGNC:9910]	1862.54	1855.37	1858.72	1859.74	1859.2	1858.97	1590.39	1820.7	1663.26	1479.61	1434.36	1385.94	43.72	48.87	43.8	40.43	38.44	36.86	1562.38	-0.238407	0.0824808	-2.89045	0.0038469	0.0839281
ENST00000591462.5	PRKCSH-212	protein_coding	PRKCSH	protein kinase C substrate 80K-H [Source:HGNC Symbol;Acc:HGNC:9411]	2030.54	2023.37	2026.72	2027.74	2027.2	2026.97	2141.1	2175.9	2200.65	2377.75	2720.16	2451.79	53.99	53.58	53.14	59.6	66.84	59.79	2344.56	0.210614	0.0728656	2.89044	0.00384702	0.0839281
ENST00000530047.5	SLC52A2-209	protein_coding	SLC52A2	solute carrier family 52 member 2 [Source:HGNC Symbol;Acc:HGNC:30224]	1578.54	1571.37	1574.72	1575.74	1575.2	1574.97	771.707	783.647	804.076	907.668	899.503	962.722	25.05	24.83	25	29.28	28.45	30.21	854.887	0.233141	0.0806934	2.88922	0.00386197	0.0841776
ENST00000257931.9	PAN2-201	protein_coding	PAN2	PAN2 poly(A) specific ribonuclease subunit [Source:HGNC Symbol;Acc:HGNC:20074]	4358.54	4351.37	4354.72	4355.74	4355.2	4354.97	197.669	181.523	101.121	53.6588	98.5986	52.3905	2.32	2.08	1.13	0.62	1.13	0.59	114.16	-1.23894	0.428945	-2.88835	0.00387272	0.0841826
ENST00000331890.5	FBXL6-201	protein_coding	FBXL6	F-box and leucine rich repeat protein 6 [Source:HGNC Symbol;Acc:HGNC:13603]	1606.54	1599.37	1602.72	1603.74	1603.2	1602.97	207.226	137.754	159.644	247.84	297.133	254.597	6.59	4.28	4.87	7.85	9.23	7.84	217.366	0.659016	0.228121	2.88889	0.00386607	0.0841826
ENST00000519472.5	CLU-204	protein_coding	CLU	clusterin [Source:HGNC Symbol;Acc:HGNC:2095]	126.61	120.41	123.19	124.1	123.55	123.48	160.716	204.581	256.44	281.021	422.746	357.903	66.47	82.71	101.63	115.5	170.3	143.27	280.568	0.770038	0.266592	2.88845	0.00387152	0.0841826
ENST00000254846.9	KDM6B-201	protein_coding	KDM6B	lysine demethylase 6B [Source:HGNC Symbol;Acc:HGNC:29012]	6534.54	6527.37	6530.72	6531.74	6531.2	6530.97	1197.96	1117.01	992.799	1357.64	1501.95	1292.56	9.38	8.54	7.44	10.56	11.45	9.78	1243.32	0.3269	0.113226	2.88715	0.00388744	0.0843658
ENST00000316423.10	UGDH-201	protein_coding	UGDH	UDP-glucose 6-dehydrogenase [Source:HGNC Symbol;Acc:HGNC:12525]	3037.54	3030.37	3033.72	3034.74	3034.2	3033.97	4097.75	3931.83	4220.51	3826.7	3494.13	3486.47	69.03	64.69	68.09	64.08	57.37	56.8	3842.9	-0.181242	0.0627872	-2.88661	0.00389422	0.0843658
ENST00000366839.8	SRP9-203	protein_coding	SRP9	signal recognition particle 9 [Source:HGNC Symbol;Acc:HGNC:11304]	1417.54	1410.37	1413.72	1414.74	1414.2	1413.97	930.461	989.423	972.105	1191.93	1177.72	1068.34	33.64	34.91	33.66	42.81	41.51	37.34	1055	0.24801	0.0859049	2.88704	0.0038889	0.0843658
ENST00000545051.2	SMAD7-202	protein_coding	SMAD7	SMAD family member 7 [Source:HGNC Symbol;Acc:HGNC:6773]	2032.54	2025.37	2028.72	2029.74	2029.2	2028.97	201.064	213.301	223.993	141.635	147.218	162.088	5.07	5.25	5.4	3.55	3.62	3.94	181.55	-0.497977	0.172518	-2.88653	0.00389521	0.0843658
ENST00000262238.8	YY1-201	protein_coding	YY1	YY1 transcription factor [Source:HGNC Symbol;Acc:HGNC:12856]	6518.54	6511.37	6514.72	6515.74	6515.2	6514.97	3463.24	3438.94	3477.31	3242.23	3184.9	3148.32	27.17	26.35	26.13	25.28	24.35	23.88	3325.82	-0.116917	0.0405101	-2.88612	0.00390028	0.0843993
ENST00000274606.7	NHP2-201	protein_coding	NHP2	NHP2 ribonucleoprotein [Source:HGNC Symbol;Acc:HGNC:14377]	686.55	679.38	682.73	683.74	683.2	682.98	7274.67	6820.91	7337.5	6120.81	6426.98	6661.89	544.33	498.38	525.8	455.23	468.72	482.01	6773.79	-0.158069	0.0548192	-2.88345	0.00393341	0.084963
ENST00000519465.5	PTK2-213	protein_coding	PTK2	protein tyrosine kinase 2 [Source:HGNC Symbol;Acc:HGNC:9611]	3100.54	3093.37	3096.72	3097.74	3097.2	3096.97	230.688	169.179	194.728	0	2.7013	45.8422	3.8	2.72	3.07	0	0.04	0.73	107.19	-3.59686	1.24731	-2.88368	0.00393052	0.084963
ENST00000374759.7	SLC38A10-202	protein_coding	SLC38A10	solute carrier family 38 member 10 [Source:HGNC Symbol;Acc:HGNC:28237]	4121.54	4114.37	4117.72	4118.74	4118.2	4117.97	2032.94	1663.1	1723.25	2109.85	2248.86	2285.54	25.23	20.16	20.49	26.03	27.2	27.43	2010.59	0.293565	0.101882	2.88142	0.00395889	0.0852229
ENST00000415593.5	P4HB-202	protein_coding	P4HB	prolyl 4-hydroxylase subunit beta [Source:HGNC Symbol;Acc:HGNC:8548]	1490.54	1483.37	1486.72	1487.74	1487.2	1486.97	2223.73	2138.96	2218.34	2343.14	2787.64	2961.04	76.42	71.8	73.04	80.06	93.36	98.4	2445.47	0.298336	0.103524	2.88179	0.0039542	0.0852229
ENST00000438773.2	TRAPPC9-202	protein_coding	TRAPPC9	trafficking protein particle complex 9 [Source:HGNC Symbol;Acc:HGNC:30832]	4118.54	4111.37	4114.72	4115.74	4115.2	4114.97	723.559	600.972	697.824	514.047	351.173	505.897	8.99	7.29	8.3	6.35	4.26	6.07	565.579	-0.557955	0.193616	-2.88176	0.00395459	0.0852229
ENST00000452853.6	PFN2-203	protein_coding	PFN2	profilin 2 [Source:HGNC Symbol;Acc:HGNC:8882]	1601.54	1594.37	1597.72	1598.74	1598.2	1597.97	5336.92	5300.16	5253.22	5724.99	5565.85	5701.01	170.68	165.56	160.9	182.03	173.49	176.33	5480.36	0.0974117	0.0338075	2.88136	0.00395964	0.0852229
ENST00000301905.8	PBK-201	protein_coding	PBK	PDZ binding kinase [Source:HGNC Symbol;Acc:HGNC:18282]	1939.54	1932.37	1935.72	1936.74	1936.2	1935.97	916.776	1019.19	1021.35	821.9	819.828	838.277	24.19	26.27	25.82	21.58	21.09	21.41	906.221	-0.252833	0.0877925	-2.87989	0.00397809	0.0853994
ENST00000369307.4	RBM8A-201	protein_coding	RBM8A	RNA binding motif protein 8A [Source:HGNC Symbol;Acc:HGNC:9905]	617.56	610.39	613.74	614.75	614.21	613.98	2940.08	2943.33	3000.05	3273.44	3215.45	3183.27	244.68	239.2	239.11	270.86	260.82	256.22	3092.6	0.122133	0.0424075	2.87999	0.0039769	0.0853994
ENST00000370078.1	PRMT6-201	protein_coding	PRMT6	protein arginine methyltransferase 6 [Source:HGNC Symbol;Acc:HGNC:18241]	2437.54	2430.37	2433.72	2434.74	2434.2	2433.97	5663.56	5682.91	6048.46	5305.16	5308.01	5321.03	118.92	116.54	121.64	110.73	108.63	108.05	5554.85	-0.126928	0.0440745	-2.87986	0.00397852	0.0853994
ENST00000359426.6	HK1-202	protein_coding	HK1	hexokinase 1 [Source:HGNC Symbol;Acc:HGNC:4922]	3426.54	3419.37	3422.72	3423.74	3423.2	3422.97	5312.65	5272.15	5336.15	5596.39	5787.56	6069.16	79.32	76.87	76.31	83.06	84.23	87.63	5562.34	0.133129	0.0462651	2.87752	0.00400809	0.0859572
ENST00000541196.2	HCP5-204	sense_overlapping	HCP5	HLA complex P5 (non-protein coding) [Source:HGNC Symbol;Acc:HGNC:21659]	2253.54	2246.37	2249.72	2250.74	2250.2	2249.97	95.6329	13.5405	20.8945	224.263	190.439	144.078	2.17	0.29	0.45	5.05	4.2	3.17	114.808	2.09891	0.729545	2.87701	0.00401461	0.0860202
ENST00000234739.7	BCL9-201	protein_coding	BCL9	B-cell CLL/lymphoma 9 [Source:HGNC Symbol;Acc:HGNC:1008]	6099.54	6092.37	6095.72	6096.74	6096.2	6095.97	1062.82	978.406	980.268	877.896	856.328	807.135	8.91	8.01	7.87	7.32	7	6.55	927.142	-0.25165	0.0875202	-2.87533	0.00403603	0.086402
ENST00000581407.5	FAM222B-209	protein_coding	FAM222B	family with sequence similarity 222 member B [Source:HGNC Symbol;Acc:HGNC:25563]	3982.54	3975.37	3978.72	3979.74	3979.2	3978.97	621.581	644.966	627.626	701.848	895.489	850.53	7.98	8.09	7.73	8.97	11.2	10.56	723.673	0.369534	0.128543	2.8748	0.0040429	0.0864719
ENST00000463372.5	C9orf3-211	protein_coding	C9orf3	chromosome 9 open reading frame 3 [Source:HGNC Symbol;Acc:HGNC:1361]	740.55	733.37	736.73	737.74	737.2	736.97	92.6593	96.239	101.162	124.397	174.214	175.205	6.44	6.51	6.73	8.54	11.73	11.75	127.313	0.70766	0.246235	2.87392	0.00405406	0.0866334
ENST00000518748.5	TRIQK-206	protein_coding	TRIQK	triple QxxK/R motif containing [Source:HGNC Symbol;Acc:HGNC:27828]	3384.54	3377.37	3380.72	3381.74	3381.2	3380.97	462.314	528.914	556.599	363.791	418.703	395.388	6.99	7.8	8.05	5.47	6.16	5.78	454.285	-0.395337	0.137686	-2.87129	0.00408806	0.0872822
ENST00000557185.5	DHRS7-209	protein_coding	DHRS7	dehydrogenase/reductase 7 [Source:HGNC Symbol;Acc:HGNC:21524]	1143.54	1136.37	1139.72	1140.74	1140.2	1139.97	1100.37	1233.04	1198.7	1407.41	1468.07	1324.6	49.34	54.01	51.48	62.71	64.15	57.42	1288.7	0.248902	0.0867097	2.87052	0.00409795	0.0874156
ENST00000342558.3	PPP3CB-201	protein_coding	PPP3CB	protein phosphatase 3 catalytic subunit beta [Source:HGNC Symbol;Acc:HGNC:9315]	2239.54	2232.37	2235.72	2236.74	2236.2	2235.97	402.191	411.861	423.741	526.855	575.37	482.169	9.19	9.2	9.27	11.97	12.82	10.66	470.364	0.35195	0.122694	2.86852	0.00412393	0.0875806
ENST00000343789.7	DNAJA4-201	protein_coding	DNAJA4	DnaJ heat shock protein family (Hsp40) member A4 [Source:HGNC Symbol;Acc:HGNC:14885]	2782.54	2775.37	2778.72	2779.74	2779.2	2778.97	863.63	1070.49	1104.03	1254.44	1280.41	1347.44	15.88	19.23	19.45	22.93	22.94	23.96	1153.41	0.354514	0.123573	2.86886	0.00411956	0.0875806
ENST00000393043.5	CLTC-202	protein_coding	CLTC	clathrin heavy chain [Source:HGNC Symbol;Acc:HGNC:2092]	5113.54	5106.37	5109.72	5110.74	5110.2	5109.97	8626.87	8558.68	9418.37	10206.1	9489.81	10205.5	86.28	83.6	90.22	101.48	92.5	98.71	9417.56	0.168693	0.0587982	2.86901	0.00411763	0.0875806
ENST00000424573.1	AC019205.3-201	processed_pseudogene	AC019205.3		9.05	7.9	8.29	8.59	8.22	8.46	557.391	638.062	713.875	462.423	498.929	487.485	3385.78	3786.95	4154.55	2791.43	2956.56	2862.14	559.694	-0.39858	0.138912	-2.8693	0.00411381	0.0875806
ENST00000606142.5	LAP3-210	protein_coding	LAP3	leucine aminopeptidase 3 [Source:HGNC Symbol;Acc:HGNC:18449]	1697.54	1690.37	1693.72	1694.74	1694.2	1693.97	3204.33	3530.34	3570.64	4022.39	3745.24	4025.24	96.67	104.03	103.16	120.62	110.11	117.43	3683.03	0.1954	0.0681153	2.86867	0.00412207	0.0875806
ENST00000304414.11	ARL6IP1-201	protein_coding	ARL6IP1	ADP ribosylation factor like GTPase 6 interacting protein 1 [Source:HGNC Symbol;Acc:HGNC:697]	2230.54	2223.37	2226.72	2227.74	2227.2	2226.97	8488.85	9200.91	9912.36	8200.04	7979.54	8010.23	194.81	206.21	217.87	187.06	178.49	177.77	8631.99	-0.190433	0.0664009	-2.86792	0.00413175	0.0875916
ENST00000449759.1	AC009086.2-201	protein_coding	AC009086.2		431.61	424.44	427.79	428.81	428.26	428.04	114.548	56.8182	82.7988	167.184	168.795	150.658	13.71	6.63	9.44	19.82	19.64	17.42	123.467	0.930175	0.324321	2.86807	0.00412989	0.0875916
ENST00000440538.6	PUM1-207	protein_coding	PUM1	pumilio RNA binding family member 1 [Source:HGNC Symbol;Acc:HGNC:14957]	3757.54	3750.37	3753.72	3754.74	3754.2	3753.97	128.781	127.422	95.2726	167.412	257.976	185.823	1.75	1.69	1.25	2.26	3.42	2.45	160.448	0.796349	0.277803	2.8666	0.00414906	0.087881
ENST00000374514.7	LYPLA2-205	protein_coding	LYPLA2	lysophospholipase II [Source:HGNC Symbol;Acc:HGNC:6738]	1631.54	1624.37	1627.72	1628.74	1628.2	1627.97	1250.54	1127.96	1204.43	1362.59	1446.5	1372.04	39.25	34.59	36.21	42.51	44.27	41.64	1294.01	0.22035	0.0769066	2.86516	0.00416801	0.0882045
ENST00000409569.2	MIR4435-2HG-203	lincRNA	MIR4435-2HG	MIR4435-2 host gene [Source:HGNC Symbol;Acc:HGNC:35163]	335.68	328.54	331.87	332.88	332.34	332.12	375.639	431.744	402.382	302.092	330.814	297.244	57.74	64.87	59.29	46.21	49.67	44.2	356.653	-0.380817	0.132981	-2.86369	0.00418736	0.0883255
ENST00000506784.5	CDK18-217	protein_coding	CDK18	cyclin dependent kinase 18 [Source:HGNC Symbol;Acc:HGNC:8751]	1964.54	1957.37	1960.72	1961.74	1961.2	1960.97	57.1881	71.1049	33.432	93.3493	152.62	116.245	1.49	1.8	0.82	2.42	3.88	2.94	87.3233	1.16744	0.407698	2.86349	0.00418998	0.0883255
ENST00000522309.1	RTL8A-204	protein_coding	RTL8A	retrotransposon Gag like 8A [Source:HGNC Symbol;Acc:HGNC:24514]	357.66	350.51	353.85	354.86	354.32	354.1	460.095	380.226	378.095	603.183	482.051	596.112	66.37	53.62	52.24	86.52	67.86	83.19	483.294	0.466325	0.162861	2.86333	0.00419213	0.0883255
ENST00000556142.5	HNRNPC-223	protein_coding	HNRNPC	heterogeneous nuclear ribonucleoprotein C (C1/C2) [Source:HGNC Symbol;Acc:HGNC:5035]	1420.54	1413.37	1416.72	1417.74	1417.2	1416.97	56.2566	62.121	76.0632	136.251	97.2427	111.336	2.02	2.2	2.62	4.88	3.4	3.88	89.8785	0.82659	0.288601	2.86413	0.0041816	0.0883255
ENST00000640615.1	HLA-B-258	protein_coding	HLA-B	major histocompatibility complex, class I, B [Source:HGNC Symbol;Acc:HGNC:4932]	67.96	63.16	65.2	65.97	65.39	65.49	62.9924	59.5925	39.4639	140.7	113.673	82.7059	48.97	45.72	29.31	109.08	86.47	62.4	83.1878	1.05672	0.369009	2.86367	0.00418762	0.0883255
ENST00000417816.2	NEBL-203	protein_coding	NEBL	nebulette [Source:HGNC Symbol;Acc:HGNC:16932]	2829.54	2822.37	2825.72	2826.74	2826.2	2825.97	412.155	451.197	415.369	343.389	344.415	319.26	7.46	7.98	7.19	6.18	6.08	5.59	380.964	-0.345491	0.12072	-2.86192	0.0042108	0.0886411
ENST00000216639.7	VRK1-201	protein_coding	VRK1	vaccinia related kinase 1 [Source:HGNC Symbol;Acc:HGNC:12718]	1566.54	1559.37	1562.72	1563.74	1563.2	1562.97	948.541	1029.83	1038.95	872.259	856.283	791.627	31.01	32.87	32.54	28.36	27.29	25.03	922.914	-0.261354	0.0913329	-2.86156	0.00421562	0.0886647
ENST00000515829.6	SMG7-215	protein_coding	SMG7	SMG7, nonsense mediated mRNA decay factor [Source:HGNC Symbol;Acc:HGNC:16792]	5450.54	5443.37	5446.72	5447.74	5447.2	5446.97	2889.46	2861.03	2778.7	2665.85	2394.74	2357.56	27.11	26.22	24.97	24.86	21.9	21.39	2657.89	-0.201414	0.0704107	-2.86055	0.00422903	0.0888689
ENST00000331944.10	CYTOR-201	lincRNA	CYTOR	cytoskeleton regulator RNA [Source:HGNC Symbol;Acc:HGNC:28717]	350.67	343.52	346.86	347.87	347.32	347.11	346.554	374.612	358.025	280.688	255.208	290.687	50.99	53.83	50.48	41.12	36.58	41.35	317.629	-0.379121	0.132584	-2.85947	0.00424345	0.0890161
ENST00000374385.9	UQCC1-205	protein_coding	UQCC1	ubiquinol-cytochrome c reductase complex assembly factor 1 [Source:HGNC Symbol;Acc:HGNC:15891]	2268.54	2261.37	2264.72	2265.74	2265.2	2264.97	474.594	338.508	330.133	620.21	510.54	566.487	10.7	7.47	7.14	13.9	11.23	12.36	473.412	0.570088	0.199362	2.85955	0.00424238	0.0890161
ENST00000398316.7	FNDC3A-202	protein_coding	FNDC3A	fibronectin type III domain containing 3A [Source:HGNC Symbol;Acc:HGNC:20296]	5535.54	5528.37	5531.72	5532.74	5532.2	5531.97	545.693	608.724	639.309	726.564	786.092	723.64	5.04	5.49	5.66	6.67	7.08	6.46	671.67	0.316501	0.110731	2.8583	0.00425924	0.0892691
ENST00000358387.8	TXNDC15-201	protein_coding	TXNDC15	thioredoxin domain containing 15 [Source:HGNC Symbol;Acc:HGNC:20652]	3369.54	3362.37	3365.72	3366.74	3366.2	3365.97	359.476	352.987	362.709	449.641	434.911	444.504	5.45	5.24	5.27	6.79	6.45	6.53	400.705	0.305923	0.107047	2.85785	0.00426527	0.0893128
ENST00000370466.3	GBP2-201	protein_coding	GBP2	guanylate binding protein 2 [Source:HGNC Symbol;Acc:HGNC:4183]	2041.54	2034.37	2037.72	2038.74	2038.2	2037.97	502.216	620.712	650.247	719.979	931.932	806.348	12.58	15.2	15.62	17.96	22.78	19.55	705.239	0.470279	0.164572	2.85759	0.00426876	0.0893128
ENST00000279873.11	ARID5B-201	protein_coding	ARID5B	AT-rich interaction domain 5B [Source:HGNC Symbol;Acc:HGNC:17362]	7712.54	7705.37	7708.72	7709.74	7709.2	7708.97	786.473	942.216	847.382	1050.71	1073.79	1022.42	5.21	6.1	5.38	6.92	6.94	6.56	953.832	0.289689	0.101397	2.85699	0.00427685	0.089404
ENST00000375812.8	PSMC5-202	protein_coding	PSMC5	proteasome 26S subunit, ATPase 5 [Source:HGNC Symbol;Acc:HGNC:9552]	1315.54	1308.37	1311.72	1312.74	1312.2	1311.97	1277.58	1155.69	1232.08	1360.32	1465.38	1573.45	49.78	43.98	45.96	52.7	55.61	59.27	1344.08	0.26347	0.0922313	2.85662	0.00428183	0.0894303
ENST00000282030.5	SETBP1-201	protein_coding	SETBP1	SET binding protein 1 [Source:HGNC Symbol;Acc:HGNC:15573]	9720.54	9713.37	9716.72	9717.74	9717.2	9716.97	448.304	382.033	396.945	337.005	289.047	288.962	2.36	1.96	2	1.76	1.48	1.47	357.049	-0.42465	0.148706	-2.85563	0.00429519	0.0896312
ENST00000331238.6	RTN4RL1-201	protein_coding	RTN4RL1	reticulon 4 receptor like 1 [Source:HGNC Symbol;Acc:HGNC:21329]	3446.54	3439.37	3442.72	3443.74	3443.2	3442.97	1495.17	1417.55	1401.52	1568.92	1704.53	1717.44	22.19	20.55	19.93	23.15	24.66	24.65	1550.86	0.210192	0.0736271	2.85481	0.00430621	0.0897052
ENST00000447648.6	TECPR1-204	protein_coding	TECPR1	tectonin beta-propeller repeat containing 1 [Source:HGNC Symbol;Acc:HGNC:22214]	6385.54	6378.37	6381.72	6382.74	6382.2	6381.97	433.012	359.566	355.169	497.978	490.296	513.259	3.47	2.81	2.72	3.97	3.83	3.97	441.546	0.387655	0.135779	2.85504	0.00430319	0.0897052
ENST00000480975.5	GNAS-238	protein_coding	GNAS	GNAS complex locus [Source:HGNC Symbol;Acc:HGNC:4392]	1355.54	1348.37	1351.72	1352.74	1352.2	1351.97	25034.8	25014.2	26453.6	27071.5	28167.9	27142.4	946.34	923.44	957.71	1017.24	1037.75	992.2	26480.7	0.106516	0.0373164	2.8544	0.00431184	0.0897445
ENST00000344063.6	RPL28-201	protein_coding	RPL28	ribosomal protein L28 [Source:HGNC Symbol;Acc:HGNC:10330]	4617.54	4610.37	4613.72	4614.74	4614.2	4613.97	772.82	731.694	832.366	611.716	641.567	661.429	8.56	7.92	8.83	6.74	6.93	7.08	708.599	-0.28818	0.101021	-2.85266	0.00433548	0.0901025
ENST00000520429.5	CCNC-210	protein_coding	CCNC	cyclin C [Source:HGNC Symbol;Acc:HGNC:1581]	2294.54	2287.37	2290.72	2291.74	2291.2	2290.97	578.282	684.902	601.759	805.847	837.393	726.936	12.89	14.93	12.85	17.88	18.21	15.68	705.853	0.345549	0.121136	2.85258	0.00433654	0.0901025
ENST00000296214.9	MEAF6-201	protein_coding	MEAF6	MYST/Esa1 associated factor 6 [Source:HGNC Symbol;Acc:HGNC:25674]	1346.54	1339.37	1342.72	1343.74	1343.2	1342.97	1158.91	1285.53	1194.46	1353.89	1542.37	1441.65	44.11	47.79	43.52	51.2	57.21	53.04	1329.47	0.253431	0.0888765	2.8515	0.00435135	0.0902828
ENST00000333991.5	APAF1-201	protein_coding	APAF1	apoptotic peptidase activating factor 1 [Source:HGNC Symbol;Acc:HGNC:576]	4360.54	4353.37	4356.72	4357.74	4357.2	4356.97	75.132	43.9714	58.4999	121.269	104.001	104.781	0.88	0.5	0.65	1.42	1.19	1.19	84.6091	0.887799	0.311379	2.85118	0.00435569	0.0902828
ENST00000337907.7	RERE-201	protein_coding	RERE	arginine-glutamic acid dipeptide repeats [Source:HGNC Symbol;Acc:HGNC:9965]	7847.54	7840.37	7843.72	7844.74	7844.2	7843.97	1105.9	737.086	1041.26	1419.91	1423.62	1246.72	7.2	4.69	6.5	9.19	9.04	7.85	1162.41	0.50214	0.17612	2.85112	0.00435651	0.0902828
ENST00000355540.7	TRRAP-201	protein_coding	TRRAP	transformation/transcription domain associated protein [Source:HGNC Symbol;Acc:HGNC:12347]	12411.5	12404.4	12407.7	12408.7	12408.2	12408	1233.16	1908.88	1969.67	1333.01	714.514	922.548	5.08	7.68	7.77	5.46	2.87	3.67	1346.96	-0.782678	0.274625	-2.84998	0.00437215	0.0904888
ENST00000560674.5	SYNM-203	protein_coding	SYNM	synemin [Source:HGNC Symbol;Acc:HGNC:24466]	5729.54	5722.37	5725.72	5726.74	5726.2	5725.97	61.7272	72.1434	101.119	127.713	147.223	142.436	0.55	0.63	0.86	1.13	1.28	1.23	108.727	0.824689	0.28938	2.84985	0.00437399	0.0904888
ENST00000228741.7	ELK3-201	protein_coding	ELK3	ELK3, ETS transcription factor [Source:HGNC Symbol;Acc:HGNC:3325]	4026.54	4019.37	4022.72	4023.74	4023.2	4022.97	465.967	543.479	441.26	394.924	324.159	284.056	5.92	6.74	5.37	4.98	4.01	3.49	408.974	-0.532608	0.186958	-2.84881	0.00438834	0.0906295
ENST00000380420.9	PIR-201	protein_coding	PIR	pirin [Source:HGNC Symbol;Acc:HGNC:30048]	1103.54	1096.37	1099.72	1100.74	1100.2	1099.97	451.522	480.39	494.866	666.147	555.081	595.171	20.99	21.8	22	30.79	25.15	26.74	540.53	0.349626	0.122721	2.84896	0.0043863	0.0906295
ENST00000377264.7	ATG2A-201	protein_coding	ATG2A	autophagy related 2A [Source:HGNC Symbol;Acc:HGNC:29028]	6178.54	6171.37	6174.72	6175.74	6175.2	6174.97	863.324	706.746	724.545	983.073	923.862	981.496	7.15	5.72	5.74	8.09	7.45	7.85	863.841	0.331947	0.116545	2.84824	0.00439612	0.090712
ENST00000337843.6	C1QTNF6-201	protein_coding	C1QTNF6	C1q and TNF related 6 [Source:HGNC Symbol;Acc:HGNC:14343]	2755.54	2748.37	2751.72	2752.74	2752.2	2751.97	1396.45	1698.82	1412.43	1729.81	1980.05	1926.2	25.93	30.8	25.12	31.94	35.84	34.6	1690.63	0.323233	0.113572	2.84606	0.00442645	0.0911974
ENST00000517921.1	PABPC1-203	protein_coding	PABPC1	poly(A) binding protein cytoplasmic 1 [Source:HGNC Symbol;Acc:HGNC:8554]	706.55	699.38	702.73	703.74	703.2	702.97	769.613	850.498	847.778	680.941	667.143	532.988	55.95	60.37	59.05	49.24	47.25	37.48	724.827	-0.39452	0.138623	-2.846	0.00442724	0.0911974
ENST00000422154.6	MORF4L2-203	protein_coding	MORF4L2	mortality factor 4 like 2 [Source:HGNC Symbol;Acc:HGNC:16849]	1804.54	1797.37	1800.72	1801.74	1801.2	1800.97	833.565	594.898	371.937	928.101	1126.41	1147.72	23.65	16.48	10.1	26.17	31.15	31.49	833.773	0.831052	0.292043	2.84564	0.00443217	0.0912207
ENST00000317508.10	PRSS8-201	protein_coding	PRSS8	protease, serine 8 [Source:HGNC Symbol;Acc:HGNC:9491]	1693.54	1686.37	1689.72	1690.74	1690.2	1689.97	2868.43	2419.43	2560.13	2981.65	3118.56	3137.84	86.74	71.46	74.16	89.62	91.92	91.76	2847.67	0.234702	0.0824942	2.84507	0.00444014	0.0913062
ENST00000372232.7	ATG4A-203	protein_coding	ATG4A	autophagy related 4A cysteine peptidase [Source:HGNC Symbol;Acc:HGNC:16489]	2136.54	2129.37	2132.72	2133.74	2133.2	2132.97	341.39	353.213	396.999	443.153	551.057	474.803	8.19	8.27	9.11	10.56	12.86	11	426.769	0.424837	0.149452	2.84264	0.00447416	0.091927
ENST00000356205.8	SLC39A1-202	protein_coding	SLC39A1	solute carrier family 39 member 1 [Source:HGNC Symbol;Acc:HGNC:12876]	1905.54	1898.37	1901.72	1902.74	1902.2	1901.97	3247.04	3022.7	3211.16	3419.55	3535.93	3565.96	87.26	79.31	82.65	91.33	92.6	92.66	3333.72	0.14955	0.0526162	2.84228	0.00447915	0.091951
ENST00000484203.5	PTCD3-215	protein_coding	PTCD3	pentatricopeptide repeat domain 3 [Source:HGNC Symbol;Acc:HGNC:24717]	749.55	742.37	745.73	746.74	746.2	745.97	168.4	213.977	193.963	125.471	118.844	139.181	11.53	14.32	12.73	8.57	7.9	9.22	159.973	-0.580401	0.204249	-2.84163	0.00448835	0.0919825
ENST00000527673.1	RPS25-202	protein_coding	RPS25	ribosomal protein S25 [Source:HGNC Symbol;Acc:HGNC:10413]	656.55	649.38	652.73	653.75	653.2	652.98	20409.5	23337.7	24813.2	19391.8	20057.4	19642	1597.24	1783.63	1859.82	1508.54	1529.84	1486.51	21275.3	-0.214463	0.0754653	-2.84188	0.00448488	0.0919825
ENST00000309007.9	DBN1-202	protein_coding	DBN1	drebrin 1 [Source:HGNC Symbol;Acc:HGNC:2695]	2816.54	2809.37	2812.72	2813.74	2813.2	2812.97	2088.48	1916.47	1843.67	1657.92	1686.96	1705.99	37.95	34.01	32.09	29.94	29.87	29.98	1816.58	-0.211396	0.0744009	-2.84131	0.00449289	0.091997
ENST00000397463.2	LYPD1-202	protein_coding	LYPD1	LY6/PLAUR domain containing 1 [Source:HGNC Symbol;Acc:HGNC:28431]	1712.54	1705.37	1708.72	1709.74	1709.2	1708.97	272.466	310.465	315.941	190.981	233.656	222.669	8.16	9.06	9.06	5.68	6.82	6.44	257.696	-0.474627	0.167139	-2.83972	0.00451535	0.0923713
ENST00000449768.2	OAS2-203	protein_coding	OAS2	2'-5'-oligoadenylate synthetase 2 [Source:HGNC Symbol;Acc:HGNC:8087]	1893.54	1886.37	1889.72	1890.74	1890.2	1889.97	910.482	1012.47	867.566	1348.72	1392.49	1028.2	24.61	26.73	22.47	36.25	36.69	26.89	1093.32	0.432802	0.152438	2.8392	0.00452272	0.0923713
ENST00000582582.1	GRB2-210	protein_coding	GRB2	growth factor receptor bound protein 2 [Source:HGNC Symbol;Acc:HGNC:4566]	405.62	398.46	401.81	402.82	402.28	402.06	637.241	717.444	874.864	488.651	569.839	555.148	80.98	89.11	106.44	61.76	70.62	68.21	640.531	-0.467386	0.164612	-2.83931	0.00452109	0.0923713
ENST00000225729.7	DRG2-201	protein_coding	DRG2	developmentally regulated GTP binding protein 2 [Source:HGNC Symbol;Acc:HGNC:3030]	1785.54	1778.37	1781.72	1782.74	1782.2	1781.97	1014.02	956.148	1014.68	1104.06	1238.51	1181.29	29.07	26.77	27.87	31.48	34.62	32.77	1084.78	0.237482	0.0836649	2.83849	0.00453281	0.0924199
ENST00000394125.8	RABEPK-204	protein_coding	RABEPK	Rab9 effector protein with kelch motifs [Source:HGNC Symbol;Acc:HGNC:16896]	1287.54	1280.37	1283.72	1284.74	1284.2	1283.97	188.367	245.162	271.662	170.574	113.449	134.259	7.5	9.53	10.36	6.76	4.39	5.17	187.246	-0.750851	0.264523	-2.8385	0.00453255	0.0924199
ENST00000229195.7	CNOT2-201	protein_coding	CNOT2	CCR4-NOT transcription complex subunit 2 [Source:HGNC Symbol;Acc:HGNC:7878]	3103.54	3096.37	3099.72	3100.74	3100.2	3099.97	116.238	157.901	112.825	276.863	202.598	184.188	1.92	2.54	1.78	4.54	3.25	2.94	175.102	0.781324	0.275476	2.83627	0.00456439	0.092985
ENST00000335585.9	PPP2R2C-202	protein_coding	PPP2R2C	protein phosphatase 2 regulatory subunit Bgamma [Source:HGNC Symbol;Acc:HGNC:9306]	3913.54	3906.37	3909.72	3910.74	3910.2	3909.97	936.382	1096.01	1068.89	854.234	873.878	776.037	12.24	14	13.39	11.1	11.14	9.81	934.238	-0.30993	0.109311	-2.83529	0.00457834	0.09319
ENST00000415673.6	SP140L-203	protein_coding	SP140L	SP140 nuclear body protein like [Source:HGNC Symbol;Acc:HGNC:25105]	2486.54	2479.37	2482.72	2483.74	2483.2	2482.97	475.552	367.793	534.055	563.354	759.059	749.855	9.79	7.39	10.52	11.52	15.22	14.92	574.945	0.587278	0.207163	2.83486	0.00458454	0.0932372
ENST00000224073.5	EDF1-201	protein_coding	EDF1	endothelial differentiation related factor 1 [Source:HGNC Symbol;Acc:HGNC:3164]	461.6	454.43	457.78	458.79	458.25	458.03	4658.93	4387.25	4364.66	4800.68	4989.66	4942.15	519.74	478.05	466.38	532.35	542.48	533.19	4690.56	0.13523	0.0477163	2.83404	0.00459639	0.0933991
ENST00000357156.6	DYNLRB1-202	protein_coding	DYNLRB1	dynein light chain roadblock-type 1 [Source:HGNC Symbol;Acc:HGNC:15468]	496.59	489.41	492.77	493.78	493.24	493.01	1706.68	1584.56	1603.93	1875.86	1789.27	1963.43	176.87	160.36	159.21	193.3	180.81	196.82	1753.96	0.202638	0.0715162	2.83345	0.00460483	0.0934913
ENST00000397914.4	CYB5A-203	protein_coding	CYB5A	cytochrome b5 type A [Source:HGNC Symbol;Acc:HGNC:2570]	440.61	433.44	436.79	437.8	437.26	437.04	252.223	247.682	233.337	324.739	349.745	299.677	29.5	28.24	26.09	37.68	39.81	33.87	284.567	0.40643	0.143493	2.8324	0.00462	0.0936409
ENST00000590514.5	MFSD11-217	protein_coding	MFSD11	major facilitator superfamily domain containing 11 [Source:HGNC Symbol;Acc:HGNC:25458]	1712.54	1705.37	1708.72	1709.74	1709.2	1708.97	156.333	191.924	183.045	229.607	252.564	275.062	4.69	5.61	5.25	6.81	7.36	7.95	214.756	0.515056	0.181827	2.83267	0.00461617	0.0936409
ENST00000487389.5	PLSCR1-214	protein_coding	PLSCR1	phospholipid scramblase 1 [Source:HGNC Symbol;Acc:HGNC:9092]	1264.54	1257.37	1260.72	1261.74	1261.2	1260.97	595.426	694.851	710.503	859.299	980.521	786.729	24.11	27.51	27.58	34.63	38.71	30.84	771.222	0.390535	0.137916	2.8317	0.00463014	0.0937671
ENST00000311672.9	UQCRH-201	protein_coding	UQCRH	ubiquinol-cytochrome c reductase hinge protein [Source:HGNC Symbol;Acc:HGNC:12590]	425.61	418.45	421.8	422.81	422.27	422.05	3195.48	3267.42	3265.97	2881.76	2966.71	3033.63	386.87	386.29	378.69	346.85	350.06	355.18	3101.83	-0.130602	0.0461667	-2.82893	0.00467035	0.0941898
ENST00000351486.9	BNIP1-202	protein_coding	BNIP1	BCL2 interacting protein 1 [Source:HGNC Symbol;Acc:HGNC:1082]	1005.54	998.37	1001.72	1002.74	1002.2	1001.97	388.94	375.393	398.748	315.356	311.977	293.905	19.86	18.71	19.49	16.01	15.48	14.51	347.386	-0.339716	0.120053	-2.82972	0.00465891	0.0941898
ENST00000352689.10	MKLN1-201	protein_coding	MKLN1	muskelin 1 [Source:HGNC Symbol;Acc:HGNC:7109]	10977.5	10970.4	10973.7	10974.7	10974.2	10974	949.441	1100.97	1090.55	847.886	899.557	822.682	4.42	5.01	4.87	3.93	4.08	3.71	951.848	-0.29052	0.102688	-2.82915	0.00466723	0.0941898
ENST00000524851.5	RPS3-203	protein_coding	RPS3	ribosomal protein S3 [Source:HGNC Symbol;Acc:HGNC:10420]	687.55	680.38	683.73	684.74	684.2	683.98	24374.9	25642.2	26462.1	21826.1	23526.9	23740.3	1821.09	1871.01	1893.56	1620.96	1713.16	1715.21	24262.1	-0.146511	0.0517904	-2.82891	0.00467063	0.0941898
ENST00000578112.5	SMARCE1-214	protein_coding	SMARCE1	SWI/SNF related, matrix associated, actin dependent regulator of chromatin, subfamily e, member 1 [Source:HGNC Symbol;Acc:HGNC:11109]	2205.54	2198.37	2201.72	2202.74	2202.2	2201.97	2808.12	2979.01	3055.62	2687.91	2637.78	2544.28	65.17	67.51	67.93	62.01	59.68	57.11	2785.46	-0.16878	0.0596412	-2.82993	0.00465582	0.0941898
ENST00000371384.3	FAM210B-201	protein_coding	FAM210B	family with sequence similarity 210 member B [Source:HGNC Symbol;Acc:HGNC:16102]	2867.54	2860.37	2863.72	2864.74	2864.2	2863.97	1079.13	1204.68	1221.03	955.053	994.077	999.527	19.26	21	20.87	16.94	17.29	17.25	1075.58	-0.248824	0.0879746	-2.82836	0.00467875	0.0942742
ENST00000373068.6	SLC25A25-203	protein_coding	SLC25A25	solute carrier family 25 member 25 [Source:HGNC Symbol;Acc:HGNC:20663]	3252.54	3245.37	3248.72	3249.74	3249.2	3248.97	1034.57	1095.09	1058.04	890.691	833.353	949.587	16.28	16.83	15.94	13.93	12.77	14.45	976.89	-0.2499	0.0883773	-2.82764	0.0046892	0.0944055
ENST00000368330.6	YY1AP1-209	protein_coding	YY1AP1	YY1 associated protein 1 [Source:HGNC Symbol;Acc:HGNC:30935]	2376.54	2369.37	2372.72	2373.74	2373.2	2372.97	336.083	328.328	167.99	74.0399	170.18	118.7	7.25	6.91	3.46	1.59	3.57	2.47	199.22	-1.20021	0.42462	-2.82656	0.00470511	0.094488
ENST00000370751.9	IFI44L-201	protein_coding	IFI44L	interferon induced protein 44 like [Source:HGNC Symbol;Acc:HGNC:17817]	5695.54	5688.37	5691.72	5692.74	5692.2	5691.97	4795.92	5015.11	4806.93	6304.06	5602.59	5230.83	43.06	43.98	41.34	56.27	49.03	45.42	5292.57	0.22928	0.0811056	2.82693	0.00469969	0.094488
ENST00000401672.7	PPP6R2-205	protein_coding	PPP6R2	protein phosphatase 6 regulatory subunit 2 [Source:HGNC Symbol;Acc:HGNC:19253]	2020.54	2013.37	2016.72	2017.74	2017.2	2016.97	104.552	76.7441	100.295	143.781	145.868	234.946	2.65	1.9	2.43	3.62	3.61	5.76	134.364	0.899627	0.318256	2.82674	0.00470252	0.094488
ENST00000378330.6	ANKRD11-203	protein_coding	ANKRD11	ankyrin repeat domain 11 [Source:HGNC Symbol;Acc:HGNC:21316]	8953.54	8946.37	8949.72	8950.74	8950.2	8949.97	4193.89	3815.94	3835.76	3551.41	3388.86	3564.96	23.95	21.28	20.98	20.16	18.86	19.69	3725.14	-0.17284	0.0611803	-2.82509	0.00472666	0.0948415
ENST00000582160.5	NT5C-210	protein_coding	NT5C	5', 3'-nucleotidase, cytosolic [Source:HGNC Symbol;Acc:HGNC:17144]	681.55	674.38	677.73	678.75	678.2	677.98	179.01	226.543	222.401	115.809	160.708	121.17	13.48	16.64	16.03	8.7	11.8	8.82	170.94	-0.664973	0.23541	-2.82475	0.0047318	0.0948653
ENST00000390015.7	GAA-202	protein_coding	GAA	glucosidase alpha, acid [Source:HGNC Symbol;Acc:HGNC:4065]	3370.54	3363.37	3366.72	3367.74	3367.2	3366.97	2505.61	2369.41	2285.73	2654.92	2778.3	3236.78	38.03	35.13	33.23	40.06	41.11	47.51	2638.46	0.276943	0.0980735	2.82383	0.00474539	0.0950583
ENST00000337190.6	MXD4-201	protein_coding	MXD4	MAX dimerization protein 4 [Source:HGNC Symbol;Acc:HGNC:13906]	3877.54	3870.37	3873.72	3874.74	3874.2	3873.97	1206.46	1024.98	1074.74	1257.74	1365.52	1462.03	15.92	13.21	13.58	16.5	17.56	18.66	1231.91	0.305292	0.108133	2.82331	0.00475313	0.0951339
ENST00000243167.8	FAAH-201	protein_coding	FAAH	fatty acid amide hydrolase [Source:HGNC Symbol;Acc:HGNC:3553]	1915.54	1908.37	1911.72	1912.74	1912.2	1911.97	587.939	537.263	597.6	683.483	692.869	704.022	15.72	14.02	15.3	18.17	18.06	18.21	633.862	0.270396	0.0958131	2.82212	0.00477076	0.0953548
ENST00000345519.9	CLTA-202	protein_coding	CLTA	clathrin light chain A [Source:HGNC Symbol;Acc:HGNC:2090]	894.54	887.37	890.72	891.74	891.2	890.97	3441	3196.85	3452.63	3700.3	3736.92	3728.3	197.36	179.06	189.68	210.96	208.87	206.8	3542.67	0.145024	0.051395	2.82176	0.00477609	0.0953548
ENST00000437771.5	BAG6-245	protein_coding	BAG6	BCL2 associated athanogene 6 [Source:HGNC Symbol;Acc:HGNC:13919]	2228.54	2221.37	2224.72	2225.74	2225.2	2224.97	497.819	392.681	452.993	581.578	561.863	606.6	11.43	8.82	9.96	13.28	12.58	13.47	515.589	0.380346	0.134786	2.82184	0.00477488	0.0953548
ENST00000372718.7	SMAP2-202	protein_coding	SMAP2	small ArfGAP2 [Source:HGNC Symbol;Acc:HGNC:25082]	2760.54	2753.37	2756.72	2757.74	2757.2	2756.97	649.057	710.659	685.318	856.321	794.18	796.512	12.03	12.87	12.17	15.79	14.35	14.27	748.674	0.260028	0.0921625	2.82141	0.00478129	0.0953794
ENST00000380668.9	PRPS2-202	protein_coding	PRPS2	phosphoribosyl pyrophosphate synthetase 2 [Source:HGNC Symbol;Acc:HGNC:9465]	2332.54	2325.37	2328.72	2329.74	2329.2	2328.97	1129.78	1268.22	1320.52	1019.39	1069.7	920.949	24.8	27.18	27.76	22.24	22.89	19.55	1121.43	-0.307051	0.108872	-2.8203	0.00479784	0.0956301
ENST00000468812.5	PPIA-204	protein_coding	PPIA	peptidylprolyl isomerase A [Source:HGNC Symbol;Acc:HGNC:9253]	2059.54	2052.37	2055.72	2056.74	2056.2	2055.97	1561.18	1710.88	1676.6	1441.04	1314.16	1462.07	38.82	41.53	39.92	35.62	31.83	35.15	1527.65	-0.22827	0.0809817	-2.81879	0.00482052	0.0960024
ENST00000373449.6	AK2-202	protein_coding	AK2	adenylate kinase 2 [Source:HGNC Symbol;Acc:HGNC:362]	3407.54	3400.37	3403.72	3404.74	3404.2	3403.97	726.115	791.674	751.324	651.391	625.354	625.417	10.9	11.61	10.8	9.73	9.16	9.08	695.212	-0.253261	0.0899169	-2.81661	0.00485334	0.0965758
ENST00000355209.8	POLR3H-202	protein_coding	POLR3H	RNA polymerase III subunit H [Source:HGNC Symbol;Acc:HGNC:30349]	4237.54	4230.37	4233.72	4234.74	4234.2	4233.97	1471.3	1587.52	1332.97	1157.95	1285.83	1138.68	17.76	18.71	15.41	13.9	15.13	13.29	1329.04	-0.29446	0.10458	-2.81565	0.0048678	0.0967031
ENST00000389231.9	USP5-202	protein_coding	USP5	ubiquitin specific peptidase 5 [Source:HGNC Symbol;Acc:HGNC:12628]	2904.54	2897.37	2900.72	2901.74	2901.2	2900.97	2717.09	2386.75	2627.59	2127.95	2197.5	2317.49	47.87	41.07	44.33	37.27	37.73	39.48	2395.73	-0.219004	0.0777801	-2.81569	0.00486732	0.0967031
ENST00000273550.11	FTH1-201	protein_coding	FTH1	ferritin heavy chain 1 [Source:HGNC Symbol;Acc:HGNC:3976]	1050.54	1043.37	1046.72	1047.74	1047.2	1046.97	4114.8	4143.36	4825.86	4718.67	5697.99	5744.62	200.85	197.49	225.62	228.96	271.06	271.15	4874.22	0.304512	0.10817	2.81512	0.00487592	0.0967844
ENST00000539909.5	ADK-205	protein_coding	ADK	adenosine kinase [Source:HGNC Symbol;Acc:HGNC:257]	1687.54	1680.37	1683.72	1684.74	1684.2	1683.97	150.969	128.706	139.583	83.6879	89.1403	99.8738	4.58	3.8	4.05	2.54	2.62	2.94	115.327	-0.617905	0.21952	-2.8148	0.00488076	0.0968004
ENST00000301012.7	MVD-201	protein_coding	MVD	mevalonate diphosphate decarboxylase [Source:HGNC Symbol;Acc:HGNC:7529]	1644.54	1637.37	1640.72	1641.74	1641.2	1640.97	1493.53	1194.55	1297.21	1602.93	1596.42	1792.82	46.52	36.35	38.68	49.62	48.47	53.99	1496.24	0.325088	0.115563	2.81309	0.00490687	0.0972378
ENST00000261609.11	HERC2-201	protein_coding	HERC2	HECT and RLD domain containing E3 ubiquitin protein ligase 2 [Source:HGNC Symbol;Acc:HGNC:4868]	15158.5	15151.4	15154.7	15155.7	15155.2	15155	2764.45	2558.93	2756.85	2374.12	2155.7	2441.02	9.32	8.43	8.9	7.96	7.08	7.96	2508.51	-0.212003	0.0754375	-2.81032	0.00494928	0.0979973
ENST00000615310.4	RET-205	protein_coding	RET	ret proto-oncogene [Source:HGNC Symbol;Acc:HGNC:9967]	4158.54	4151.37	4154.72	4155.74	4155.2	4154.97	149.364	445.369	175.5	40.7804	135.066	60.5766	1.84	5.35	2.07	0.5	1.61	0.72	167.776	-1.70833	0.608309	-2.80833	0.00497995	0.0985233
ENST00000460851.5	EIF2A-203	protein_coding	EIF2A	eukaryotic translation initiation factor 2A [Source:HGNC Symbol;Acc:HGNC:3254]	2019.54	2012.37	2015.72	2016.74	2016.2	2015.97	2233.12	2509.98	2460.58	2086.97	2148.85	1958.16	56.61	62.15	59.74	52.6	53.1	48.02	2232.94	-0.218738	0.0778986	-2.80799	0.00498523	0.0985466
ENST00000437621.6	PSMG3-AS1-201	lincRNA	PSMG3-AS1	PSMG3 antisense RNA 1 (head to head) [Source:HGNC Symbol;Acc:HGNC:22230]	5522.54	5515.37	5518.72	5519.74	5519.2	5518.97	389.141	334.799	342.636	420.698	487.593	521.447	3.6	3.03	3.04	3.88	4.4	4.67	416.052	0.42302	0.150683	2.80735	0.00499517	0.0986617
ENST00000589341.5	APPBP2-204	protein_coding	APPBP2	amyloid beta precursor protein binding protein 2 [Source:HGNC Symbol;Acc:HGNC:622]	1526.54	1519.37	1522.72	1523.74	1523.2	1522.97	3000.86	3111.13	3394.36	3569.46	3697.95	3554.55	100.71	101.97	109.1	119.07	120.94	115.35	3388.05	0.18615	0.0663218	2.80677	0.00500417	0.0987132
ENST00000589804.1	CD3EAP-202	protein_coding	CD3EAP	CD3e molecule associated protein [Source:HGNC Symbol;Acc:HGNC:24219]	1651.54	1644.37	1647.72	1648.74	1648.2	1647.97	288.525	282.264	307.585	205.999	193.137	239.042	8.94	8.56	9.14	6.36	5.83	7.17	252.759	-0.455411	0.162261	-2.80665	0.005006	0.0987132
ENST00000446947.6	TBC1D14-206	protein_coding	TBC1D14	TBC1 domain family member 14 [Source:HGNC Symbol;Acc:HGNC:29246]	3842.54	3835.37	3838.72	3839.74	3839.2	3838.97	281.715	290.921	184.695	96.5839	167.482	57.3024	3.75	3.78	2.36	1.28	2.18	0.74	179.783	-1.24455	0.443703	-2.80491	0.005033	0.0991641
ENST00000379380.8	LYRM7-201	protein_coding	LYRM7	LYR motif containing 7 [Source:HGNC Symbol;Acc:HGNC:28072]	6172.54	6165.37	6168.72	6169.74	6169.2	6168.97	501.891	495.963	540.693	417.484	391.696	428.125	4.16	4.01	4.29	3.44	3.16	3.43	462.642	-0.312633	0.111474	-2.80454	0.00503887	0.0991984
ENST00000389924.6	DDX42-202	protein_coding	DDX42	DEAD-box helicase 42 [Source:HGNC Symbol;Acc:HGNC:18676]	3760.54	3753.37	3756.72	3757.74	3757.2	3756.97	6348.74	6702.6	6619.77	6934.7	7203.07	7136.6	86.37	89.05	86.25	93.78	95.49	93.88	6824.25	0.113174	0.0403598	2.80413	0.00504522	0.0992419
ENST00000640694.1	IQSEC2-218	protein_coding	IQSEC2	IQ motif and Sec7 domain 2 [Source:HGNC Symbol;Acc:HGNC:29059]	5779.54	5772.37	5775.72	5776.74	5776.2	5775.97	245.121	196.139	201.403	268.304	325.512	331.532	2.17	1.69	1.71	2.36	2.81	2.84	261.335	0.524886	0.187229	2.80344	0.0050561	0.0993745
ENST00000245323.4	EFNB2-201	protein_coding	EFNB2	ephrin B2 [Source:HGNC Symbol;Acc:HGNC:3227]	4282.54	4275.37	4278.72	4279.74	4279.2	4278.97	1290.64	1331.56	1376.42	1508.88	1493.84	1516.87	15.42	15.53	15.75	17.92	17.39	17.52	1419.7	0.176857	0.0631132	2.80222	0.00507527	0.0996697
ENST00000611607.4	NDUFA5-211	protein_coding	NDUFA5	NADH:ubiquinone oxidoreductase subunit A5 [Source:HGNC Symbol;Acc:HGNC:7688]	1325.54	1318.37	1321.72	1322.74	1322.2	1321.97	674.068	826.93	654.49	550.351	576.7	510.839	26.06	31.22	24.24	21.13	21.72	19.09	632.23	-0.396166	0.141402	-2.8017	0.00508343	0.0997482
ENST00000237530.10	RPN2-201	protein_coding	RPN2	ribophorin II [Source:HGNC Symbol;Acc:HGNC:10382]	2336.54	2329.37	2332.72	2333.74	2333.2	2332.97	10113.5	10566.6	10524.1	9111.16	9906.91	9514.84	221.55	226.06	220.8	198.42	211.53	201.57	9956.18	-0.129389	0.0461944	-2.80096	0.00509516	0.0998152
ENST00000269187.9	SLC39A6-201	protein_coding	SLC39A6	solute carrier family 39 member 6 [Source:HGNC Symbol;Acc:HGNC:18607]	3364.54	3357.37	3360.72	3361.74	3361.2	3360.97	28157.2	38781.3	33478.7	42448.7	49030.1	38044	428.17	575.94	487.58	641.67	726.66	559.44	38323.3	0.367184	0.131084	2.80112	0.00509249	0.0998152
ENST00000518154.5	MATN2-203	protein_coding	MATN2	matrilin 2 [Source:HGNC Symbol;Acc:HGNC:6908]	2484.54	2477.37	2480.72	2481.74	2481.2	2480.97	118.888	191.794	225.657	98.7211	99.9473	58.9406	2.44	3.86	4.45	2.03	1.99	1.17	132.325	-1.06453	0.380097	-2.80068	0.0050995	0.0998187
ENST00000371579.6	DPP7-201	protein_coding	DPP7	dipeptidyl peptidase 7 [Source:HGNC Symbol;Acc:HGNC:14892]	1411.54	1404.37	1407.72	1408.74	1408.2	1407.97	1802.86	1501.09	1560.55	1866.74	1975.92	2051.53	65.44	53.22	54.25	67.34	69.9	72.01	1793.12	0.276707	0.0988183	2.80016	0.00510777	0.0998991
ENST00000473565.5	CLK1-210	protein_coding	CLK1	CDC like kinase 1 [Source:HGNC Symbol;Acc:HGNC:2068]	3029.54	3022.37	3025.72	3026.74	3026.2	3025.97	150.212	227.835	169.656	128.773	74.2858	85.9542	2.54	3.75	2.74	2.16	1.23	1.4	139.453	-0.918034	0.327973	-2.79912	0.00512423	0.10014
ENST00000598188.5	BABAM1-208	protein_coding	BABAM1	BRISC and BRCA1 A complex member 1 [Source:HGNC Symbol;Acc:HGNC:25008]	1291.54	1284.37	1287.72	1288.74	1288.2	1287.97	668.665	706.106	667.869	833.561	787.39	789.183	26.53	27.37	25.37	32.88	30.46	30.27	742.129	0.240002	0.0857802	2.79787	0.0051441	0.100446
ENST00000396466.5	RPL7-203	protein_coding	RPL7	ribosomal protein L7 [Source:HGNC Symbol;Acc:HGNC:10363]	583.56	576.39	579.74	580.76	580.22	579.99	15398.7	17527	18788.7	13334.1	15339.6	14785.7	1356.67	1508.12	1585.45	1167.87	1317.16	1259.78	15862.3	-0.250966	0.0897345	-2.79676	0.00516178	0.100709
ENST00000323301.8	LRSAM1-202	protein_coding	LRSAM1	leucine rich repeat and sterile alpha motif containing 1 [Source:HGNC Symbol;Acc:HGNC:25135]	3197.54	3190.37	3193.72	3194.74	3194.2	3193.97	408.636	438.723	443.777	534.413	524.053	519.817	6.54	6.85	6.8	8.5	8.17	8.04	478.237	0.2898	0.103642	2.79617	0.00517127	0.100812
ENST00000394456.9	GTF2F1-201	protein_coding	GTF2F1	general transcription factor IIF subunit 1 [Source:HGNC Symbol;Acc:HGNC:4652]	2552.54	2545.37	2548.72	2549.74	2549.2	2548.97	2062.29	1988.94	2123.67	2209.44	2433.86	2407.56	41.36	38.94	40.79	44.03	47.55	46.68	2204.29	0.190517	0.0681593	2.79517	0.00518717	0.10104
ENST00000261556.10	TMEM260-201	protein_coding	TMEM260	transmembrane protein 260 [Source:HGNC Symbol;Acc:HGNC:20185]	4085.54	4078.37	4081.72	4082.74	4082.2	4081.97	383.689	467.927	454.631	343.413	305.25	234.939	4.8	5.73	5.45	4.28	3.73	2.85	364.975	-0.566788	0.202859	-2.794	0.00520604	0.101326
ENST00000476876.5	IFI44L-208	protein_coding	IFI44L	interferon induced protein 44 like [Source:HGNC Symbol;Acc:HGNC:17817]	711.55	704.37	707.73	708.74	708.2	707.97	722.426	680.607	679.723	941.526	803.542	818.719	52.16	48	47	67.52	56.52	57.12	774.424	0.299831	0.107337	2.79336	0.00521634	0.101444
ENST00000250113.11	FXR2-201	protein_coding	FXR2	FMR1 autosomal homolog 2 [Source:HGNC Symbol;Acc:HGNC:4024]	2778.54	2771.37	2774.72	2775.74	2775.2	2774.97	1326.73	1252.1	1402.39	1483	1557.29	1608.58	24.44	22.52	24.73	27.14	27.94	28.65	1438.35	0.222973	0.0798773	2.79144	0.00524741	0.101965
ENST00000505890.5	DDX60L-207	protein_coding	DDX60L	DEAD-box helicase 60 like [Source:HGNC Symbol;Acc:HGNC:26429]	4389.54	4382.37	4385.72	4386.74	4386.2	4385.97	59.0326	99.2169	66.857	145.952	125.612	128.521	0.69	1.13	0.74	1.7	1.43	1.45	104.199	0.837709	0.300509	2.78764	0.00530942	0.102935
ENST00000532414.2	MEX3A-202	protein_coding	MEX3A	mex-3 RNA binding family member A [Source:HGNC Symbol;Acc:HGNC:33482]	5945.54	5938.37	5941.72	5942.74	5942.2	5941.97	870.462	780.032	782.21	708.325	642.921	634.412	7.48	6.55	6.44	6.06	5.39	5.28	736.394	-0.293754	0.105379	-2.78759	0.00531017	0.102935
ENST00000617571.4	INF2-209	protein_coding	INF2	inverted formin, FH2 and WH2 domain containing [Source:HGNC Symbol;Acc:HGNC:23791]	2777.54	2770.37	2773.72	2774.74	2774.2	2773.97	669.624	656.508	717.077	580.539	572.674	524.732	12.33	11.82	12.65	10.62	10.27	9.35	620.192	-0.287715	0.103204	-2.78784	0.00530609	0.102935
ENST00000355999.4	STK39-201	protein_coding	STK39	serine/threonine kinase 39 [Source:HGNC Symbol;Acc:HGNC:17717]	3641.54	3634.37	3637.72	3638.74	3638.2	3637.97	1043.63	1105.11	1158.32	931.49	948.163	952.039	14.66	15.16	15.58	13.02	12.98	12.93	1023.13	-0.224006	0.0803896	-2.7865	0.0053281	0.103104
ENST00000398516.2	SLC26A1-202	protein_coding	SLC26A1	solute carrier family 26 member 1 [Source:HGNC Symbol;Acc:HGNC:10993]	2930.54	2923.37	2926.72	2927.74	2927.2	2926.97	59.0095	56.3971	58.5023	94.4326	86.4415	140.801	1.03	0.95	0.97	1.64	1.48	2.38	82.5974	0.894953	0.321201	2.78627	0.0053318	0.103104
ENST00000400331.9	MACC1-202	protein_coding	MACC1	MACC1, MET transcriptional regulator [Source:HGNC Symbol;Acc:HGNC:30215]	8980.54	8973.37	8976.72	8977.74	8977.2	8976.97	118.113	138.618	122.844	80.4944	78.3396	86.7706	0.67	0.77	0.67	0.46	0.43	0.48	104.197	-0.621191	0.222918	-2.78664	0.0053258	0.103104
ENST00000435879.2	RPSAP12-201	processed_pseudogene	RPSAP12	ribosomal protein SA pseudogene 12 [Source:HGNC Symbol;Acc:HGNC:6504]	709.55	702.37	705.73	706.74	706.2	705.97	232.491	260.469	269.214	166.214	203.924	174.387	16.82	18.44	18.67	11.94	14.36	12.19	217.783	-0.489765	0.175805	-2.78585	0.00533878	0.103156
ENST00000249016.4	MCHR1-201	protein_coding	MCHR1	melanin concentrating hormone receptor 1 [Source:HGNC Symbol;Acc:HGNC:4479]	2672.54	2665.37	2668.72	2669.74	2669.2	2668.97	137.673	180.493	167.987	113.746	75.6361	100.69	2.63	3.38	3.08	2.16	1.42	1.87	129.371	-0.737143	0.264704	-2.78478	0.00535645	0.10317
ENST00000262429.8	ATP2C2-201	protein_coding	ATP2C2	ATPase secretory pathway Ca2+ transporting 2 [Source:HGNC Symbol;Acc:HGNC:29103]	3197.54	3190.37	3193.72	3194.74	3194.2	3193.97	475.699	410.527	489.743	599.873	576.729	564.022	7.61	6.42	7.5	9.54	8.99	8.73	519.432	0.335927	0.12063	2.78476	0.00535671	0.10317
ENST00000389057.9	DIAPH1-203	protein_coding	DIAPH1	diaphanous related formin 1 [Source:HGNC Symbol;Acc:HGNC:2876]	5583.54	5576.37	5579.72	5580.74	5580.2	5579.97	1214.84	1290.71	1234.33	1406.98	1703.2	1451.37	11.13	11.55	10.83	12.82	15.2	12.86	1383.57	0.285106	0.102376	2.78488	0.0053548	0.10317
ENST00000487898.1	FAF1-204	protein_coding	FAF1	Fas associated factor 1 [Source:HGNC Symbol;Acc:HGNC:3578]	502.58	495.41	498.76	499.78	499.24	499.01	240.915	219.047	240.841	181.156	162.047	171.123	24.63	21.88	23.64	18.48	16.22	16.98	202.521	-0.446344	0.160266	-2.78503	0.00535232	0.10317
ENST00000301030.8	ANKRD11-201	protein_coding	ANKRD11	ankyrin repeat domain 11 [Source:HGNC Symbol;Acc:HGNC:21316]	9122.54	9115.37	9118.72	9119.74	9119.2	9118.97	964.592	1168.67	1079.69	913.344	819.865	699.076	5.4	6.4	5.8	5.09	4.48	3.79	940.873	-0.402476	0.144632	-2.78275	0.00539005	0.103501
ENST00000378460.6	NUP160-201	protein_coding	NUP160	nucleoporin 160 [Source:HGNC Symbol;Acc:HGNC:18017]	5197.54	5190.37	5193.72	5194.74	5194.2	5193.97	3470.82	3374.06	3728.9	3256.1	2890.44	3031.27	34.15	32.43	35.14	31.85	27.72	28.84	3291.93	-0.204239	0.0733964	-2.78268	0.00539113	0.103501
ENST00000472897.5	RBM3-205	protein_coding	RBM3	RNA binding motif (RNP1, RRM) protein 3 [Source:HGNC Symbol;Acc:HGNC:9900]	322.7	315.56	318.89	319.9	319.36	319.14	246.189	268.966	303.682	163.888	217.389	180.969	39.47	42.03	46.55	26.15	33.83	28.03	230.18	-0.547565	0.196766	-2.78283	0.00538872	0.103501
ENST00000520861.5	CCAR2-206	protein_coding	CCAR2	cell cycle and apoptosis regulator 2 [Source:HGNC Symbol;Acc:HGNC:23360]	3381.54	3374.37	3377.72	3378.74	3378.2	3377.97	160.96	153.374	135.389	212.48	256.625	197.285	2.44	2.27	1.97	3.19	3.79	2.89	186.019	0.56314	0.202333	2.78323	0.00538212	0.103501
ENST00000438032.5	HP1BP3-210	protein_coding	HP1BP3	heterochromatin protein 1 binding protein 3 [Source:HGNC Symbol;Acc:HGNC:24973]	980.54	973.37	976.72	977.74	977.2	976.97	292.571	340.374	355.282	191.999	224.19	261.977	15.28	17.39	17.79	9.98	11.43	13.26	277.732	-0.539672	0.193982	-2.78207	0.0054014	0.103533
ENST00000551812.5	BAZ2A-214	protein_coding	BAZ2A	bromodomain adjacent to zinc finger domain 2A [Source:HGNC Symbol;Acc:HGNC:962]	8421.54	8414.37	8417.72	8418.74	8418.2	8417.97	2986.74	2998.96	2632.39	3130.68	3603.62	3503.57	18.14	17.78	15.31	18.9	21.32	20.57	3142.66	0.248708	0.0893952	2.78212	0.00540058	0.103533
ENST00000264031.2	UPK2-201	protein_coding	UPK2	uroplakin 2 [Source:HGNC Symbol;Acc:HGNC:12579]	737.55	730.37	733.73	734.74	734.2	733.97	73.9478	70.1993	73.5726	100.804	116.143	138.363	5.16	4.76	4.9	6.96	7.88	9.32	95.5049	0.709956	0.255268	2.78122	0.00541547	0.103615
ENST00000355299.8	GMPR2-202	protein_coding	GMPR2	guanosine monophosphate reductase 2 [Source:HGNC Symbol;Acc:HGNC:4377]	1793.54	1786.37	1789.72	1790.74	1790.2	1789.97	249.263	319.466	333.49	393.771	426.795	428.964	7.11	8.89	9.11	11.17	11.87	11.84	358.625	0.470513	0.169161	2.78145	0.00541174	0.103615
ENST00000418153.6	PHF21A-202	protein_coding	PHF21A	PHD finger protein 21A [Source:HGNC Symbol;Acc:HGNC:24156]	2551.54	2544.37	2547.72	2548.74	2548.2	2547.97	167.164	156.814	159.631	288.654	229.609	205.473	3.35	3.08	3.06	5.75	4.49	3.98	201.224	0.579388	0.208355	2.78077	0.00542294	0.103615
ENST00000472837.5	GTF2IRD2B-203	protein_coding	GTF2IRD2B	GTF2I repeat domain containing 2B [Source:HGNC Symbol;Acc:HGNC:33125]	3381.54	3374.37	3377.72	3378.74	3378.2	3377.97	296.882	331.558	335.129	383.107	428.158	484.616	4.49	4.9	4.85	5.77	6.32	7.09	376.575	0.430135	0.154669	2.78101	0.00541907	0.103615
ENST00000262482.10	RNF167-201	protein_coding	RNF167	ring finger protein 167 [Source:HGNC Symbol;Acc:HGNC:24544]	1736.54	1729.37	1732.72	1733.74	1733.2	1732.97	294.808	279.975	349.373	410.934	387.626	464.985	8.7	8.07	9.88	12.06	11.13	13.25	364.617	0.451884	0.162586	2.77936	0.00544664	0.103985
ENST00000537981.5	RTN3-208	protein_coding	RTN3	reticulon 3 [Source:HGNC Symbol;Acc:HGNC:10469]	2353.54	2346.37	2349.72	2350.74	2350.2	2349.97	6412.29	6468.51	6710.43	7157.17	7144.87	6871.51	139.45	137.38	139.78	154.72	151.44	144.52	6794.13	0.111207	0.0400181	2.77891	0.0054542	0.104046
ENST00000265981.6	RNF141-201	protein_coding	RNF141	ring finger protein 141 [Source:HGNC Symbol;Acc:HGNC:21159]	3895.54	3888.37	3891.72	3892.74	3892.2	3891.97	408.715	467.948	482.211	321.947	359.276	361.005	5.37	6	6.07	4.21	4.6	4.58	400.184	-0.382295	0.137605	-2.7782	0.00546602	0.104106
ENST00000299335.7	COX11-201	protein_coding	COX11	COX11, cytochrome c oxidase copper chaperone [Source:HGNC Symbol;Acc:HGNC:2261]	2318.54	2311.37	2314.72	2315.74	2315.2	2314.97	1264.73	1552.57	1598.84	1135.27	1168.3	1211.56	27.91	33.47	33.8	24.92	25.14	25.86	1321.88	-0.328569	0.118257	-2.77842	0.00546237	0.104106
ENST00000279263.11	TM7SF2-201	protein_coding	TM7SF2	transmembrane 7 superfamily member 2 [Source:HGNC Symbol;Acc:HGNC:11863]	1543.54	1536.37	1539.72	1540.74	1540.2	1539.97	819.005	818.695	754.766	948.429	904.904	960.268	27.17	26.54	23.99	31.3	29.25	30.81	867.678	0.236526	0.0851636	2.77731	0.00548104	0.104237
ENST00000393077.2	VTI1A-201	protein_coding	VTI1A	vesicle transport through interaction with t-SNAREs 1A [Source:HGNC Symbol;Acc:HGNC:17792]	3952.54	3945.37	3948.72	3949.74	3949.2	3948.97	651.091	776.896	780.563	600.97	548.369	590.214	8.42	9.82	9.67	7.74	6.92	7.38	658.017	-0.342412	0.12329	-2.77728	0.00548158	0.104237
ENST00000331483.8	P4HB-201	protein_coding	P4HB	prolyl 4-hydroxylase subunit beta [Source:HGNC Symbol;Acc:HGNC:8548]	2424.54	2417.37	2420.72	2421.74	2421.2	2420.97	16741.2	13366.3	14395.3	16737.4	18375.4	17819.7	353.42	275.57	291.06	351.24	378.07	363.79	16239.2	0.250101	0.0901227	2.77512	0.00551814	0.10455
ENST00000375058.5	MAGED2-204	protein_coding	MAGED2	MAGE family member D2 [Source:HGNC Symbol;Acc:HGNC:16353]	1869.54	1862.37	1865.72	1866.74	1866.2	1865.97	1900.44	1950.49	2048.56	2341.2	2385.19	2116.98	52.06	52.18	53.75	63.75	63.67	56.06	2123.81	0.212305	0.0765048	2.77505	0.00551929	0.10455
ENST00000523003.5	GTF2H2-213	protein_coding	GTF2H2	general transcription factor IIH subunit 2 [Source:HGNC Symbol;Acc:HGNC:4656]	681.55	674.38	677.73	678.75	678.2	677.98	155.855	201.623	204.007	99.724	132.348	123.627	11.74	14.8	14.71	7.46	9.72	9.03	152.864	-0.659534	0.237668	-2.77502	0.00551981	0.10455
ENST00000527372.6	MYO18A-202	protein_coding	MYO18A	myosin XVIIIA [Source:HGNC Symbol;Acc:HGNC:31104]	9813.54	9806.37	9809.72	9810.74	9810.2	9809.97	180.754	170.167	163.792	217.873	245.825	238.21	0.94	0.87	0.82	1.13	1.25	1.2	202.77	0.446721	0.160957	2.7754	0.00551333	0.10455
ENST00000529548.1	FTH1-204	protein_coding	FTH1	ferritin heavy chain 1 [Source:HGNC Symbol;Acc:HGNC:3976]	388.64	381.48	384.82	385.83	385.29	385.07	581.986	477.726	561.244	662.209	702.168	918.715	77.21	61.93	71.36	87.31	90.89	117.84	650.675	0.495025	0.178378	2.77515	0.0055177	0.10455
ENST00000606812.5	CCDC120-207	protein_coding	CCDC120	coiled-coil domain containing 120 [Source:HGNC Symbol;Acc:HGNC:28910]	3678.54	3671.37	3674.72	3675.74	3675.2	3674.97	448.043	433.017	406.999	502.233	547.017	544.373	6.23	5.88	5.42	6.94	7.42	7.32	480.28	0.307636	0.110873	2.77467	0.00552585	0.104581
ENST00000593256.6	TMEM205-216	protein_coding	TMEM205	transmembrane protein 205 [Source:HGNC Symbol;Acc:HGNC:29631]	613.56	606.39	609.74	610.75	610.21	609.99	1469.54	1586.77	1412.24	1651.19	1775.86	1766	123.11	129.79	113.33	137.51	145.01	143.04	1610.27	0.21801	0.07858	2.77438	0.00553076	0.104592
ENST00000369750.3	TPBG-201	protein_coding	TPBG	trophoblast glycoprotein [Source:HGNC Symbol;Acc:HGNC:12004]	6305.54	6298.37	6301.72	6302.74	6302.2	6301.97	339.071	474.54	394.446	291.917	271.486	288.964	2.75	3.76	3.06	2.35	2.15	2.26	343.404	-0.499767	0.180163	-2.77397	0.00553766	0.10464
ENST00000409913.5	MCFD2-207	protein_coding	MCFD2	multiple coagulation factor deficiency 2 [Source:HGNC Symbol;Acc:HGNC:18451]	3796.54	3789.37	3792.72	3793.74	3793.2	3792.97	313.013	561.552	223.974	92.2911	93.1956	229.21	4.22	7.39	2.89	1.24	1.22	2.99	252.206	-1.39958	0.504855	-2.77225	0.00556711	0.105114
ENST00000558116.5	RNF213-205	protein_coding	RNF213	ring finger protein 213 [Source:HGNC Symbol;Acc:HGNC:14539]	3589.54	3582.37	3585.72	3586.74	3586.2	3585.97	379.173	382.283	298.355	554.814	511.899	431.406	5.4	5.33	4.07	7.86	7.11	5.94	426.322	0.499208	0.180132	2.77135	0.0055825	0.105321
ENST00000355773.5	SLC17A5-201	protein_coding	SLC17A5	solute carrier family 17 member 5 [Source:HGNC Symbol;Acc:HGNC:10933]	3276.54	3269.37	3272.72	3273.74	3273.2	3272.97	287.036	274.053	278.3	360.569	348.469	350.365	4.48	4.18	4.16	5.6	5.31	5.28	316.465	0.335321	0.121057	2.76995	0.00560642	0.10569
ENST00000335972.10	UBA1-201	protein_coding	UBA1	ubiquitin like modifier activating enzyme 1 [Source:HGNC Symbol;Acc:HGNC:12469]	3380.54	3373.37	3376.72	3377.74	3377.2	3376.97	8475.44	8030.71	8662.38	9193.51	8965.65	9848.68	128.28	118.7	125.57	138.32	132.24	144.14	8862.73	0.15448	0.0558252	2.76722	0.00565371	0.106497
ENST00000356467.4	FAM168A-202	protein_coding	FAM168A	family with sequence similarity 168 member A [Source:HGNC Symbol;Acc:HGNC:28999]	1588.54	1581.37	1584.72	1585.74	1585.2	1584.97	238.482	138.886	129.555	98.7064	78.3351	85.1387	7.69	4.36	4	3.16	2.45	2.65	128.184	-0.95088	0.343879	-2.76516	0.00568954	0.107088
ENST00000256682.8	ARF3-201	protein_coding	ARF3	ADP ribosylation factor 3 [Source:HGNC Symbol;Acc:HGNC:654]	3926.54	3919.37	3922.72	3923.74	3923.2	3922.97	9507.83	9631.77	9760.39	10114.5	10108.4	10401.2	123.87	122.55	121.78	131	128.34	131.04	9920.68	0.0840693	0.0304109	2.76445	0.00570196	0.107225
ENST00000584031.5	CYB561-219	protein_coding	CYB561	cytochrome b561 [Source:HGNC Symbol;Acc:HGNC:2571]	3021.54	3014.37	3017.72	3018.74	3018.2	3017.97	291.481	210.917	228.158	462.508	363.325	316.803	4.93	3.49	3.69	7.79	6	5.19	312.199	0.642923	0.232587	2.76423	0.00570573	0.107225
ENST00000326195.12	ABCF1-201	protein_coding	ABCF1	ATP binding cassette subfamily F member 1 [Source:HGNC Symbol;Acc:HGNC:70]	3302.54	3295.37	3298.72	3299.74	3299.2	3298.97	3088.57	3014.56	3170.78	3302.01	3414.45	3533.94	47.85	45.61	47.04	50.86	51.55	52.94	3254.05	0.144518	0.0522874	2.76391	0.00571124	0.107244
ENST00000373935.3	IPMK-201	protein_coding	IPMK	inositol polyphosphate multikinase [Source:HGNC Symbol;Acc:HGNC:20739]	5954.54	5947.37	5950.72	5951.74	5951.2	5950.97	594.026	675.201	706.997	529.097	526.763	530.45	5.1	5.66	5.82	4.52	4.41	4.41	593.756	-0.316799	0.114657	-2.76301	0.00572709	0.107458
ENST00000245552.6	NT5C-201	protein_coding	NT5C	5', 3'-nucleotidase, cytosolic [Source:HGNC Symbol;Acc:HGNC:17144]	775.55	768.37	771.72	772.74	772.2	771.97	268.234	141.495	187.273	348.541	297.111	394.616	17.74	9.16	11.86	22.96	19.21	25.29	272.878	0.800304	0.289759	2.76196	0.00574551	0.107708
ENST00000262982.2	CSE1L-201	protein_coding	CSE1L	chromosome segregation 1 like [Source:HGNC Symbol;Acc:HGNC:2431]	3374.54	3367.37	3370.72	3371.74	3371.2	3370.97	11297.6	11956.4	13060.8	10996.4	10440.6	10677.1	171.29	177.05	189.66	165.73	154.28	156.54	11404.8	-0.177365	0.0642335	-2.76125	0.00575808	0.107708
ENST00000268099.13	SCAMP2-201	protein_coding	SCAMP2	secretory carrier membrane protein 2 [Source:HGNC Symbol;Acc:HGNC:10564]	2274.54	2267.37	2270.72	2271.74	2271.2	2270.97	3246.2	2987.89	3170.94	3370.38	3554.87	3666.61	73.05	65.67	68.34	75.41	77.98	79.8	3332.82	0.171217	0.0620223	2.76056	0.00577015	0.107708
ENST00000361654.8	CLIP1-203	protein_coding	CLIP1	CAP-Gly domain containing linker protein 1 [Source:HGNC Symbol;Acc:HGNC:10461]	5389.54	5382.37	5385.72	5386.74	5386.2	5385.97	872.199	818.41	685.274	1032.43	972.484	999.508	8.27	7.59	6.23	9.74	8.99	9.17	896.717	0.339817	0.12309	2.76073	0.00576731	0.107708
ENST00000402297.5	CEBPZOS-204	protein_coding	CEBPZOS	CEBPZ opposite strand [Source:HGNC Symbol;Acc:HGNC:49288]	2979.54	2972.37	2975.72	2976.74	2976.2	2975.97	630.34	685.774	656.896	510.797	571.325	541.103	10.82	11.51	10.81	8.72	9.56	8.99	599.373	-0.282206	0.102189	-2.7616	0.00575191	0.107708
ENST00000409112.5	SP100-203	protein_coding	SP100	SP100 nuclear antigen [Source:HGNC Symbol;Acc:HGNC:11206]	2019.54	2012.37	2015.72	2016.74	2016.2	2015.97	50.042	72.2298	114.504	157.73	139.114	209.569	1.26	1.79	2.78	3.98	3.43	5.15	123.865	1.09721	0.397473	2.76047	0.00577185	0.107708
ENST00000636835.1	KIF16B-206	protein_coding	KIF16B	kinesin family member 16B [Source:HGNC Symbol;Acc:HGNC:15869]	4930.54	4923.37	4926.72	4927.74	4927.2	4926.97	43.831	48.4765	81.8991	132.003	136.418	94.1389	0.45	0.49	0.82	1.36	1.38	0.94	89.461	1.04895	0.379937	2.76086	0.00576486	0.107708
ENST00000287025.3	MTERF3-201	protein_coding	MTERF3	mitochondrial transcription termination factor 3 [Source:HGNC Symbol;Acc:HGNC:24258]	1230.54	1223.37	1226.72	1227.74	1227.2	1226.97	573.958	613.553	622.74	516.001	498.363	466.635	23.92	24.95	24.85	21.38	20.22	18.8	548.542	-0.291437	0.105593	-2.76001	0.00577991	0.107775
ENST00000299166.8	NDUFB8-201	protein_coding	NDUFB8	NADH:ubiquinone oxidoreductase subunit B8 [Source:HGNC Symbol;Acc:HGNC:7703]	492.59	485.42	488.77	489.78	489.24	489.02	1262.17	1195.28	1218.43	1381.7	1394.97	1377.17	131.86	121.96	121.97	143.56	142.06	139.12	1304.95	0.175199	0.0634886	2.75953	0.00578839	0.107849
ENST00000605870.5	KIAA0391-211	protein_coding	KIAA0391	KIAA0391 [Source:HGNC Symbol;Acc:HGNC:19958]	1227.54	1220.37	1223.72	1224.74	1224.2	1223.97	141.034	115.254	160.492	207.044	198.535	214.489	5.87	4.7	6.4	8.58	8.07	8.65	172.808	0.569434	0.206397	2.75893	0.00579906	0.107964
ENST00000315475.6	ZNF354C-201	protein_coding	ZNF354C	zinc finger protein 354C [Source:HGNC Symbol;Acc:HGNC:16736]	5232.54	5225.37	5228.72	5229.74	5229.2	5228.97	164.597	171.351	173.826	126.638	116.158	117.878	1.61	1.63	1.62	1.23	1.11	1.11	145.075	-0.498598	0.180757	-2.75839	0.00580875	0.108061
ENST00000374114.7	RBM12-203	protein_coding	RBM12	RNA binding motif protein 12 [Source:HGNC Symbol;Acc:HGNC:9898]	6483.54	6476.37	6479.72	6480.74	6480.2	6479.97	1053.91	1103.49	1030.41	901.512	945.474	814.502	8.31	8.5	7.79	7.07	7.27	6.21	974.881	-0.262757	0.0952777	-2.7578	0.00581918	0.108171
ENST00000335877.10	PSMF1-203	protein_coding	PSMF1	proteasome inhibitor subunit 1 [Source:HGNC Symbol;Acc:HGNC:9571]	4111.54	4104.37	4107.72	4108.74	4108.2	4107.97	517.849	465.67	480.538	411.023	348.471	387.199	6.44	5.65	5.73	5.08	4.23	4.66	435.125	-0.350563	0.127142	-2.75725	0.00582903	0.10827
ENST00000381344.7	IDI1-201	protein_coding	IDI1	isopentenyl-diphosphate delta isomerase 1 [Source:HGNC Symbol;Acc:HGNC:5387]	2122.54	2115.37	2118.72	2119.74	2119.2	2118.97	2734.66	2794.14	3271.27	3822.05	3244.21	3681.36	65.97	65.82	75.56	91.63	76.27	85.87	3257.95	0.288623	0.10469	2.75694	0.0058345	0.108288
ENST00000561504.1	ADIRF-203	protein_coding	ADIRF	adipogenesis regulatory factor [Source:HGNC Symbol;Acc:HGNC:24043]	521.58	514.41	517.76	518.77	518.23	518.01	60.4658	57.8665	78.6054	100.768	116.136	112.17	5.96	5.56	7.44	9.86	11.16	10.71	87.6685	0.73449	0.266481	2.75625	0.00584679	0.108432
ENST00000343575.10	CXCL12-201	protein_coding	CXCL12	C-X-C motif chemokine ligand 12 [Source:HGNC Symbol;Acc:HGNC:10672]	1678.54	1671.37	1674.72	1675.74	1675.2	1674.97	638.707	609.668	715.467	561.137	495.674	461.712	19.5	18.17	20.9	17.01	14.72	13.62	580.394	-0.373465	0.135565	-2.75488	0.00587144	0.108638
ENST00000370949.1	SRSF11-201	protein_coding	SRSF11	serine and arginine rich splicing factor 11 [Source:HGNC Symbol;Acc:HGNC:10782]	2855.54	2848.37	2851.72	2852.74	2852.2	2851.97	627.627	704.987	763.876	586.981	540.259	500.992	11.24	12.35	13.1	10.46	9.44	8.68	620.787	-0.366162	0.132914	-2.75489	0.00587124	0.108638
ENST00000634733.1	HIST1H3E-202	protein_coding	HIST1H3E	histone cluster 1 H3 family member e [Source:HGNC Symbol;Acc:HGNC:4769]	2500.54	2493.37	2496.72	2497.74	2497.2	2496.97	353.985	350.867	335.978	441.026	441.659	412.584	7.25	7.01	6.59	8.98	8.81	8.17	389.35	0.314001	0.113972	2.75507	0.00586801	0.108638
ENST00000260324.11	SQOR-201	protein_coding	SQOR	sulfide quinone oxidoreductase [Source:HGNC Symbol;Acc:HGNC:20390]	1824.54	1817.37	1820.72	1821.74	1821.2	1820.97	189.41	141.102	232.356	287.551	341.706	276.698	5.32	3.87	6.24	8.03	9.35	7.5	244.804	0.680444	0.247154	2.75312	0.00590302	0.108886
ENST00000268059.10	PML-202	protein_coding	PML	promyelocytic leukemia [Source:HGNC Symbol;Acc:HGNC:9113]	2850.54	2843.37	2846.72	2847.74	2847.2	2846.97	206.526	354.186	130.377	583.762	586.181	342.999	3.71	6.21	2.24	10.41	10.25	5.96	367.339	1.13198	0.411129	2.75335	0.00589893	0.108886
ENST00000477902.6	MTG1-205	protein_coding	MTG1	mitochondrial ribosome associated GTPase 1 [Source:HGNC Symbol;Acc:HGNC:32159]	1104.54	1097.37	1100.72	1101.74	1101.2	1100.97	132.066	73.4711	163.005	69.7256	41.8674	50.7574	6.13	3.33	7.25	3.23	1.91	2.27	88.4821	-1.18338	0.429741	-2.7537	0.00589249	0.108886
ENST00000554169.1	SNHG10-203	antisense_RNA	SNHG10	small nucleolar RNA host gene 10 [Source:HGNC Symbol;Acc:HGNC:27510]	802.54	795.37	798.72	799.74	799.2	798.97	139.932	135.813	143.797	94.3765	97.2367	96.6066	8.98	8.51	8.82	5.97	6.1	5.97	117.96	-0.543003	0.197232	-2.75312	0.00590299	0.108886
ENST00000479365.5	SSR1-206	protein_coding	SSR1	signal sequence receptor subunit 1 [Source:HGNC Symbol;Acc:HGNC:11323]	939.54	932.37	935.72	936.74	936.2	935.97	713.478	795.093	805.876	873.088	962.934	1047.09	38.95	42.4	42.13	47.38	51.25	55.29	866.26	0.318452	0.115686	2.75273	0.00591003	0.108932
ENST00000634247.1	AC008038.1-201	processed_pseudogene	AC008038.1		1135.54	1128.37	1131.72	1132.74	1132.2	1131.97	2814.68	3079.85	3138.02	2579.89	2693.03	2690.95	127.07	135.78	135.7	115.81	118.52	117.5	2832.74	-0.181529	0.0659696	-2.7517	0.00592861	0.10919
ENST00000249806.10	CLN6-201	protein_coding	CLN6	CLN6, transmembrane ER protein [Source:HGNC Symbol;Acc:HGNC:2077]	2064.54	2057.37	2060.72	2061.74	2061.2	2060.97	1743.49	1629.62	1777.73	1363.78	1412.76	1572.58	43.23	39.47	42.22	33.62	34.15	37.71	1583.33	-0.243104	0.088454	-2.74837	0.00598923	0.110222
ENST00000237612.7	ABCG2-201	protein_coding	ABCG2	ATP binding cassette subfamily G member 2 (Junior blood group) [Source:HGNC Symbol;Acc:HGNC:74]	4300.54	4293.37	4296.72	4297.74	4297.2	4296.97	704.802	915.517	975.278	1087.13	1180.48	1183.7	8.38	10.64	11.11	12.85	13.69	13.62	1007.82	0.411286	0.149689	2.7476	0.00600328	0.110396
ENST00000242351.9	ZC3HAV1-201	protein_coding	ZC3HAV1	zinc finger CCCH-type containing, antiviral 1 [Source:HGNC Symbol;Acc:HGNC:23721]	6921.54	6914.37	6917.72	6918.74	6918.2	6917.97	3430.24	4000.13	3934.41	4296.16	4527.47	4334.45	25.34	28.86	27.84	31.55	32.6	30.97	4087.15	0.21139	0.0770191	2.74465	0.00605763	0.111125
ENST00000358691.9	HELZ-201	protein_coding	HELZ	helicase with zinc finger [Source:HGNC Symbol;Acc:HGNC:16878]	13631.5	13624.4	13627.7	13628.7	13628.2	13628	3278.06	3405.24	3459.65	3098.58	3132.25	3059.06	12.29	12.47	12.43	11.55	11.45	11.09	3238.8	-0.127341	0.0463913	-2.74494	0.00605221	0.111125
ENST00000374524.1	PITHD1-202	protein_coding	PITHD1	PITH domain containing 1 [Source:HGNC Symbol;Acc:HGNC:25022]	1113.54	1106.37	1109.72	1110.74	1110.2	1109.97	346.236	376.388	293.408	456.973	436.232	446.173	15.93	16.93	12.92	20.92	19.58	19.86	392.568	0.4021	0.146514	2.74444	0.00606143	0.111125
ENST00000523944.5	MCM4-215	protein_coding	MCM4	minichromosome maintenance complex component 4 [Source:HGNC Symbol;Acc:HGNC:6947]	3926.54	3919.37	3922.72	3923.74	3923.2	3922.97	7472.29	7314.59	7854.94	6801.68	7081.52	6338.45	97.35	93.06	98.01	88.09	89.91	79.86	7143.91	-0.164132	0.0597992	-2.74472	0.00605623	0.111125
ENST00000305885.2	FEN1-201	protein_coding	FEN1	flap structure-specific endonuclease 1 [Source:HGNC Symbol;Acc:HGNC:3650]	2117.54	2110.37	2113.72	2114.74	2114.2	2113.97	4042.1	3912.49	4281.74	3613.89	3542.7	3783.69	97.72	92.38	99.14	86.85	83.47	88.46	3862.77	-0.1612	0.0587541	-2.74364	0.00607616	0.11131
ENST00000462668.5	SMC4-203	protein_coding	SMC4	structural maintenance of chromosomes 4 [Source:HGNC Symbol;Acc:HGNC:14013]	4056.54	4049.37	4052.72	4053.74	4053.2	4052.97	2320.01	2737.67	2586.55	2110.91	2275.87	1930.27	29.25	33.72	31.24	26.46	27.97	23.54	2326.88	-0.276044	0.100838	-2.7375	0.00619086	0.113324
ENST00000345254.8	SEC24C-202	protein_coding	SEC24C	SEC24 homolog C, COPII coat complex component [Source:HGNC Symbol;Acc:HGNC:10705]	4254.54	4247.37	4250.72	4251.74	4251.2	4250.97	3979.23	3738.77	4141.8	4401.08	4324.83	4795.37	47.84	43.9	47.69	52.6	50.67	55.75	4230.18	0.189462	0.0692301	2.7367	0.00620585	0.113354
[truncated: 22,686 more rows]
