# Supplementary material
Source: Preprints.org preprint supplement (doi:10.20944/preprints202004.0323.v1)
Supplement: Supplementary file 1 [file supplementary › Supplementary_Table_7_GO_enrichment_analysis_parent_genes_of_DE_isoforms.xlsx]

## Sheet: Annotation_down_isoforms
Input ID	Gene ID	Type	Tax ID	Homologene Gene ID	Homologene Gene Tax ID	GO:0000280 nuclear division	GO:0044772 mitotic cell cycle phase trans	GO:0009124 nucleoside monophosphate biosy	GO:0051301 cell division	GO:0000724 double-strand break repair via	GO:0043043 peptide biosynthetic process	GO:0010638 positive regulation of organel	GO:0048701 embryonic cranial skeleton mor	GO:0000226 microtubule cytoskeleton organ	GO:0007143 female meiotic nuclear divisio	GO:0019083 viral transcription	GO:0006511 ubiquitin-dependent protein ca	GO:0032259 methylation	GO:0007045 cell-substrate adherens juncti	GO:0035860 glial cell-derived neurotrophi	GO:1903431 positive regulation of cell ma	GO:0010257 NADH dehydrogenase complex ass	GO:0000904 cell morphogenesis involved in	GO:0006554 lysine catabolic process	GO:0009113 purine nucleobase biosynthetic
DBNDD1	79007	symbol	H. sapiens	79007	H. sapiens	0.0	0.0	0.0	0.0	0.0	0.0	0.0	0.0	0.0	0.0	0.0	0.0	0.0	0.0	0.0	0.0	0.0	0.0	0.0	0.0
FAM168A	23201	symbol	H. sapiens	23201	H. sapiens	0.0	0.0	0.0	0.0	1.0	0.0	0.0	0.0	0.0	0.0	0.0	0.0	0.0	0.0	0.0	0.0	0.0	0.0	0.0	0.0
OXCT1	5019	symbol	H. sapiens	5019	H. sapiens	0.0	0.0	0.0	0.0	0.0	0.0	0.0	0.0	0.0	0.0	0.0	0.0	0.0	0.0	0.0	0.0	1.0	0.0	0.0	0.0
MAGED2	10916	symbol	H. sapiens	10916	H. sapiens	0.0	0.0	0.0	0.0	0.0	0.0	0.0	0.0	0.0	0.0	0.0	0.0	0.0	0.0	0.0	0.0	0.0	0.0	0.0	0.0
CBX1	10951	symbol	H. sapiens	10951	H. sapiens	0.0	0.0	0.0	0.0	0.0	0.0	0.0	0.0	0.0	0.0	0.0	0.0	0.0	0.0	0.0	0.0	0.0	0.0	0.0	0.0
USP5	8078	symbol	H. sapiens	8078	H. sapiens	0.0	0.0	0.0	0.0	0.0	0.0	0.0	0.0	0.0	0.0	0.0	1.0	0.0	0.0	0.0	0.0	0.0	0.0	0.0	0.0
IGFBP5	3488	symbol	H. sapiens	3488	H. sapiens	0.0	0.0	0.0	0.0	0.0	1.0	0.0	1.0	0.0	0.0	0.0	0.0	0.0	1.0	0.0	1.0	0.0	0.0	0.0	0.0
RAMP3	10268	symbol	H. sapiens	10268	H. sapiens	0.0	0.0	0.0	0.0	0.0	0.0	0.0	0.0	0.0	0.0	1.0	0.0	0.0	1.0	0.0	1.0	0.0	0.0	0.0	0.0
EBPL	84650	symbol	H. sapiens	84650	H. sapiens	0.0	0.0	0.0	0.0	0.0	0.0	0.0	0.0	0.0	0.0	0.0	0.0	0.0	0.0	0.0	0.0	0.0	0.0	0.0	0.0
PACSIN1	29993	symbol	H. sapiens	29993	H. sapiens	1.0	0.0	0.0	0.0	0.0	0.0	1.0	0.0	0.0	0.0	1.0	0.0	0.0	0.0	0.0	0.0	0.0	1.0	0.0	0.0
DLGAP5	9787	symbol	H. sapiens	9787	H. sapiens	1.0	1.0	0.0	0.0	0.0	0.0	1.0	0.0	1.0	0.0	0.0	0.0	0.0	0.0	0.0	0.0	0.0	0.0	0.0	0.0
SDC1	6382	symbol	H. sapiens	6382	H. sapiens	0.0	0.0	1.0	0.0	0.0	0.0	1.0	1.0	0.0	0.0	0.0	0.0	0.0	0.0	0.0	0.0	0.0	0.0	0.0	0.0
ILKAP	80895	symbol	H. sapiens	80895	H. sapiens	0.0	0.0	0.0	0.0	0.0	0.0	0.0	0.0	0.0	0.0	0.0	0.0	0.0	0.0	0.0	0.0	0.0	0.0	0.0	0.0
HMGB1P5	10354	symbol	H. sapiens	10354	H. sapiens	0.0	0.0	0.0	0.0	0.0	0.0	0.0	0.0	0.0	0.0	0.0	0.0	0.0	0.0	0.0	0.0	0.0	0.0	0.0	0.0
SLC39A11	201266	symbol	H. sapiens	201266	H. sapiens	0.0	0.0	0.0	0.0	0.0	0.0	0.0	0.0	0.0	0.0	0.0	0.0	0.0	0.0	0.0	0.0	0.0	0.0	0.0	0.0
TBRG4	9238	symbol	H. sapiens	9238	H. sapiens	0.0	1.0	0.0	0.0	0.0	0.0	0.0	0.0	0.0	0.0	1.0	0.0	0.0	0.0	0.0	0.0	1.0	0.0	0.0	0.0
ABHD17C	58489	symbol	H. sapiens	58489	H. sapiens	0.0	0.0	0.0	0.0	0.0	0.0	0.0	0.0	0.0	0.0	0.0	0.0	0.0	0.0	0.0	0.0	0.0	0.0	0.0	0.0
PSMB7	5695	symbol	H. sapiens	5695	H. sapiens	0.0	1.0	0.0	0.0	0.0	0.0	0.0	1.0	0.0	0.0	1.0	1.0	0.0	0.0	0.0	0.0	0.0	0.0	0.0	0.0
GGH	8836	symbol	H. sapiens	8836	H. sapiens	0.0	0.0	1.0	0.0	0.0	0.0	0.0	0.0	0.0	0.0	0.0	0.0	0.0	0.0	0.0	0.0	0.0	0.0	0.0	0.0
THBS1	7057	symbol	H. sapiens	7057	H. sapiens	1.0	1.0	1.0	0.0	0.0	1.0	0.0	0.0	0.0	0.0	0.0	0.0	0.0	1.0	0.0	0.0	0.0	1.0	0.0	0.0
CACNG4	27092	symbol	H. sapiens	27092	H. sapiens	0.0	0.0	1.0	0.0	0.0	0.0	0.0	0.0	0.0	0.0	1.0	0.0	0.0	0.0	0.0	0.0	0.0	0.0	0.0	0.0
PRR11	55771	symbol	H. sapiens	55771	H. sapiens	0.0	1.0	0.0	0.0	0.0	0.0	0.0	0.0	0.0	0.0	0.0	0.0	0.0	0.0	0.0	0.0	0.0	0.0	0.0	0.0
DARS1	1615	symbol	H. sapiens	1615	H. sapiens	0.0	0.0	0.0	0.0	0.0	1.0	0.0	0.0	0.0	0.0	0.0	0.0	0.0	0.0	0.0	0.0	0.0	0.0	0.0	0.0
PAICS	10606	symbol	H. sapiens	10606	H. sapiens	0.0	0.0	1.0	0.0	0.0	0.0	0.0	0.0	0.0	0.0	0.0	0.0	0.0	0.0	0.0	0.0	0.0	0.0	0.0	1.0
HNRNPH3	3189	symbol	H. sapiens	3189	H. sapiens	0.0	0.0	0.0	0.0	0.0	0.0	0.0	0.0	0.0	0.0	0.0	0.0	0.0	0.0	0.0	0.0	0.0	0.0	0.0	0.0
FAU	2197	symbol	H. sapiens	2197	H. sapiens	0.0	0.0	0.0	0.0	0.0	0.0	0.0	0.0	0.0	0.0	0.0	0.0	0.0	0.0	0.0	0.0	0.0	0.0	0.0	0.0
NARS2	79731	symbol	H. sapiens	79731	H. sapiens	0.0	0.0	0.0	0.0	0.0	1.0	0.0	0.0	0.0	0.0	0.0	0.0	0.0	0.0	0.0	0.0	0.0	0.0	0.0	0.0
CFDP1	10428	symbol	H. sapiens	10428	H. sapiens	0.0	0.0	0.0	0.0	0.0	0.0	0.0	0.0	0.0	0.0	0.0	0.0	0.0	0.0	0.0	0.0	0.0	0.0	0.0	0.0
C16orf74	404550	symbol	H. sapiens	404550	H. sapiens	0.0	0.0	0.0	0.0	0.0	0.0	0.0	0.0	0.0	0.0	0.0	0.0	0.0	0.0	0.0	0.0	0.0	0.0	0.0	0.0
OTULIN	90268	symbol	H. sapiens	90268	H. sapiens	0.0	0.0	0.0	0.0	0.0	0.0	0.0	0.0	0.0	0.0	0.0	0.0	0.0	0.0	0.0	0.0	0.0	0.0	0.0	0.0
MYO5B	4645	symbol	H. sapiens	4645	H. sapiens	0.0	0.0	0.0	0.0	0.0	0.0	0.0	0.0	0.0	0.0	0.0	0.0	0.0	0.0	0.0	0.0	0.0	0.0	0.0	0.0
CA2	760	symbol	H. sapiens	760	H. sapiens	0.0	0.0	0.0	0.0	0.0	0.0	0.0	1.0	0.0	0.0	0.0	0.0	0.0	0.0	0.0	0.0	0.0	0.0	0.0	0.0
OTUD6B	51633	symbol	H. sapiens	51633	H. sapiens	0.0	0.0	0.0	0.0	0.0	0.0	0.0	0.0	0.0	0.0	0.0	0.0	0.0	0.0	0.0	0.0	0.0	0.0	0.0	0.0
NCK1	4690	symbol	H. sapiens	4690	H. sapiens	0.0	0.0	0.0	0.0	1.0	1.0	1.0	0.0	0.0	0.0	1.0	0.0	0.0	1.0	0.0	1.0	0.0	0.0	0.0	0.0
CUX1	1523	symbol	H. sapiens	1523	H. sapiens	0.0	0.0	0.0	0.0	0.0	0.0	0.0	0.0	0.0	0.0	0.0	0.0	0.0	0.0	0.0	0.0	0.0	1.0	0.0	0.0
NAA15	80155	symbol	H. sapiens	80155	H. sapiens	0.0	0.0	0.0	0.0	0.0	0.0	0.0	0.0	0.0	0.0	0.0	0.0	0.0	0.0	0.0	0.0	0.0	0.0	0.0	0.0
NDUFAF2	91942	symbol	H. sapiens	91942	H. sapiens	0.0	0.0	0.0	0.0	0.0	0.0	0.0	0.0	0.0	0.0	0.0	0.0	0.0	1.0	0.0	0.0	1.0	0.0	0.0	0.0
SYTL5	94122	symbol	H. sapiens	94122	H. sapiens	0.0	0.0	0.0	0.0	0.0	0.0	0.0	0.0	0.0	0.0	0.0	0.0	0.0	0.0	0.0	0.0	0.0	0.0	0.0	0.0
MCM7	4176	symbol	H. sapiens	4176	H. sapiens	0.0	1.0	0.0	0.0	1.0	0.0	0.0	0.0	0.0	0.0	0.0	0.0	0.0	0.0	0.0	0.0	0.0	0.0	0.0	0.0
TM4SF1	4071	symbol	H. sapiens	4071	H. sapiens	0.0	0.0	0.0	0.0	0.0	0.0	0.0	1.0	0.0	0.0	0.0	0.0	0.0	0.0	0.0	0.0	0.0	0.0	0.0	0.0
OXR1	55074	symbol	H. sapiens	55074	H. sapiens	0.0	0.0	0.0	0.0	1.0	0.0	0.0	0.0	0.0	0.0	0.0	0.0	0.0	0.0	0.0	0.0	0.0	0.0	0.0	0.0
PEAK1	79834	symbol	H. sapiens	79834	H. sapiens	0.0	0.0	0.0	0.0	0.0	0.0	0.0	0.0	0.0	0.0	0.0	0.0	0.0	1.0	0.0	1.0	0.0	1.0	0.0	0.0
RNF4	6047	symbol	H. sapiens	6047	H. sapiens	0.0	1.0	0.0	0.0	0.0	0.0	1.0	0.0	1.0	0.0	0.0	1.0	0.0	0.0	0.0	0.0	0.0	0.0	0.0	0.0
GCSH	2653	symbol	H. sapiens	2653	H. sapiens	0.0	0.0	0.0	0.0	0.0	0.0	0.0	0.0	0.0	0.0	0.0	0.0	1.0	0.0	0.0	0.0	0.0	0.0	1.0	0.0
TUBB3	10381	symbol	H. sapiens	10381	H. sapiens	0.0	0.0	0.0	0.0	0.0	0.0	0.0	0.0	1.0	0.0	0.0	0.0	0.0	0.0	0.0	0.0	0.0	1.0	0.0	0.0
GRB2	2885	symbol	H. sapiens	2885	H. sapiens	0.0	0.0	0.0	0.0	0.0	0.0	1.0	1.0	0.0	0.0	0.0	0.0	0.0	1.0	0.0	1.0	0.0	1.0	0.0	0.0
MYO1D	4642	symbol	H. sapiens	4642	H. sapiens	0.0	0.0	0.0	0.0	0.0	0.0	0.0	0.0	0.0	0.0	0.0	0.0	0.0	0.0	0.0	0.0	0.0	0.0	0.0	0.0
SLCO3A1	28232	symbol	H. sapiens	28232	H. sapiens	0.0	0.0	0.0	0.0	0.0	0.0	0.0	0.0	0.0	0.0	0.0	0.0	0.0	0.0	0.0	0.0	0.0	0.0	0.0	0.0
RNFT2	84900	symbol	H. sapiens	84900	H. sapiens	0.0	0.0	0.0	0.0	0.0	0.0	0.0	0.0	0.0	0.0	0.0	0.0	0.0	0.0	0.0	0.0	0.0	0.0	0.0	0.0
SHISA2	387914	symbol	H. sapiens	387914	H. sapiens	0.0	0.0	0.0	0.0	0.0	0.0	0.0	0.0	0.0	0.0	0.0	0.0	0.0	0.0	0.0	0.0	0.0	0.0	0.0	0.0
PACS1	55690	symbol	H. sapiens	55690	H. sapiens	0.0	0.0	0.0	0.0	0.0	0.0	0.0	0.0	0.0	0.0	1.0	0.0	0.0	0.0	0.0	0.0	0.0	0.0	0.0	0.0
RPL10A	4736	symbol	H. sapiens	4736	H. sapiens	0.0	0.0	0.0	0.0	0.0	1.0	0.0	0.0	0.0	0.0	1.0	0.0	0.0	0.0	0.0	0.0	0.0	0.0	0.0	0.0
NDUFV1	4723	symbol	H. sapiens	4723	H. sapiens	0.0	0.0	1.0	0.0	0.0	0.0	0.0	0.0	0.0	0.0	0.0	0.0	0.0	0.0	0.0	0.0	1.0	0.0	0.0	0.0
ATP11C	286410	symbol	H. sapiens	286410	H. sapiens	0.0	0.0	0.0	0.0	0.0	0.0	0.0	0.0	0.0	0.0	0.0	0.0	0.0	0.0	0.0	0.0	0.0	0.0	0.0	0.0
MRPL11	65003	symbol	H. sapiens	65003	H. sapiens	0.0	0.0	0.0	0.0	0.0	1.0	0.0	0.0	0.0	0.0	1.0	0.0	0.0	0.0	0.0	0.0	0.0	0.0	0.0	0.0
CTHRC1	115908	symbol	H. sapiens	115908	H. sapiens	0.0	0.0	0.0	0.0	0.0	0.0	0.0	1.0	0.0	0.0	0.0	0.0	0.0	0.0	0.0	0.0	0.0	0.0	0.0	0.0
MAGI1	9223	symbol	H. sapiens	9223	H. sapiens	0.0	0.0	0.0	0.0	0.0	0.0	0.0	0.0	0.0	0.0	0.0	0.0	0.0	0.0	0.0	0.0	0.0	0.0	0.0	0.0
PAXBP1	94104	symbol	H. sapiens	94104	H. sapiens	0.0	0.0	0.0	0.0	0.0	0.0	1.0	0.0	0.0	0.0	0.0	0.0	1.0	0.0	0.0	0.0	0.0	0.0	0.0	0.0
CYTOR	112597	symbol	H. sapiens	112597	H. sapiens	0.0	0.0	0.0	0.0	0.0	0.0	0.0	0.0	0.0	0.0	0.0	0.0	0.0	0.0	0.0	0.0	0.0	0.0	0.0	0.0
WASHC4	23325	symbol	H. sapiens	23325	H. sapiens	0.0	0.0	0.0	0.0	0.0	0.0	0.0	0.0	0.0	0.0	0.0	0.0	0.0	0.0	0.0	0.0	0.0	0.0	0.0	0.0
MAD2L1	4085	symbol	H. sapiens	4085	H. sapiens	1.0	1.0	0.0	1.0	0.0	0.0	0.0	0.0	1.0	0.0	0.0	1.0	0.0	0.0	0.0	0.0	0.0	0.0	0.0	0.0
RAD54B	25788	symbol	H. sapiens	25788	H. sapiens	1.0	0.0	0.0	0.0	1.0	0.0	0.0	0.0	0.0	1.0	0.0	0.0	0.0	0.0	0.0	0.0	0.0	0.0	0.0	0.0
POLR3H	171568	symbol	H. sapiens	171568	H. sapiens	0.0	0.0	0.0	0.0	0.0	0.0	0.0	0.0	0.0	0.0	0.0	0.0	0.0	0.0	0.0	0.0	0.0	0.0	0.0	0.0
CLYBL	171425	symbol	H. sapiens	171425	H. sapiens	0.0	0.0	1.0	0.0	0.0	0.0	0.0	0.0	0.0	0.0	0.0	0.0	0.0	0.0	0.0	0.0	0.0	0.0	0.0	0.0
HMGB1	3146	symbol	H. sapiens	3146	H. sapiens	1.0	0.0	0.0	0.0	1.0	0.0	0.0	0.0	0.0	0.0	1.0	1.0	0.0	1.0	0.0	0.0	0.0	1.0	0.0	0.0
RET	5979	symbol	H. sapiens	5979	H. sapiens	0.0	0.0	0.0	0.0	0.0	0.0	0.0	1.0	0.0	0.0	0.0	0.0	0.0	1.0	1.0	1.0	0.0	1.0	0.0	0.0
RECQL5	9400	symbol	H. sapiens	9400	H. sapiens	1.0	0.0	0.0	1.0	1.0	0.0	0.0	0.0	0.0	0.0	0.0	0.0	0.0	0.0	0.0	0.0	0.0	0.0	0.0	0.0
IDS	3423	symbol	H. sapiens	3423	H. sapiens	0.0	0.0	0.0	0.0	0.0	0.0	0.0	0.0	0.0	0.0	0.0	0.0	0.0	0.0	0.0	0.0	0.0	0.0	0.0	0.0
PTMA	5757	symbol	H. sapiens	5757	H. sapiens	0.0	0.0	0.0	0.0	0.0	0.0	0.0	0.0	0.0	0.0	0.0	0.0	0.0	0.0	0.0	0.0	0.0	0.0	0.0	0.0
JARID2	3720	symbol	H. sapiens	3720	H. sapiens	1.0	0.0	0.0	0.0	0.0	0.0	1.0	0.0	0.0	0.0	0.0	0.0	1.0	0.0	0.0	0.0	0.0	0.0	0.0	0.0
CTSL	1514	symbol	H. sapiens	1514	H. sapiens	0.0	0.0	0.0	0.0	0.0	0.0	0.0	0.0	0.0	0.0	0.0	1.0	0.0	0.0	0.0	0.0	0.0	0.0	0.0	0.0
EPB41	2035	symbol	H. sapiens	2035	H. sapiens	0.0	0.0	0.0	1.0	0.0	0.0	0.0	0.0	0.0	0.0	0.0	0.0	0.0	0.0	0.0	0.0	0.0	0.0	0.0	0.0
NPIPA7	101059938	symbol	H. sapiens	101059938	H. sapiens	0.0	0.0	0.0	0.0	0.0	0.0	0.0	0.0	0.0	0.0	0.0	0.0	0.0	0.0	0.0	0.0	0.0	0.0	0.0	0.0
DHRS2	10202	symbol	H. sapiens	10202	H. sapiens	0.0	0.0	0.0	0.0	0.0	0.0	0.0	0.0	0.0	0.0	0.0	0.0	0.0	0.0	0.0	0.0	0.0	0.0	0.0	0.0
BIRC5	332	symbol	H. sapiens	332	H. sapiens	1.0	0.0	1.0	1.0	0.0	0.0	0.0	0.0	1.0	0.0	0.0	0.0	0.0	0.0	0.0	0.0	0.0	0.0	0.0	0.0
SYF2	25949	symbol	H. sapiens	25949	H. sapiens	0.0	1.0	0.0	0.0	0.0	0.0	0.0	1.0	0.0	0.0	0.0	0.0	0.0	0.0	0.0	0.0	0.0	0.0	0.0	0.0
SND1	27044	symbol	H. sapiens	27044	H. sapiens	0.0	1.0	0.0	0.0	0.0	0.0	0.0	0.0	0.0	0.0	1.0	0.0	0.0	0.0	0.0	0.0	0.0	0.0	0.0	0.0
YY1AP1	55249	symbol	H. sapiens	55249	H. sapiens	0.0	0.0	0.0	0.0	0.0	0.0	0.0	0.0	0.0	0.0	0.0	0.0	0.0	0.0	0.0	0.0	0.0	0.0	0.0	0.0
RSL1D1	26156	symbol	H. sapiens	26156	H. sapiens	0.0	0.0	0.0	0.0	1.0	0.0	0.0	0.0	0.0	0.0	1.0	0.0	0.0	0.0	0.0	1.0	0.0	0.0	0.0	0.0
NCAPG2	54892	symbol	H. sapiens	54892	H. sapiens	0.0	0.0	0.0	1.0	0.0	0.0	0.0	1.0	0.0	0.0	0.0	0.0	0.0	0.0	0.0	0.0	0.0	0.0	0.0	0.0
ELP5	23587	symbol	H. sapiens	23587	H. sapiens	0.0	0.0	0.0	0.0	0.0	0.0	0.0	0.0	0.0	0.0	0.0	0.0	0.0	1.0	0.0	0.0	0.0	0.0	0.0	0.0
SULF2	55959	symbol	H. sapiens	55959	H. sapiens	0.0	0.0	0.0	0.0	0.0	0.0	0.0	1.0	0.0	0.0	0.0	0.0	0.0	0.0	1.0	0.0	0.0	0.0	0.0	0.0
SDCCAG8	10806	symbol	H. sapiens	10806	H. sapiens	0.0	1.0	0.0	0.0	0.0	0.0	0.0	1.0	1.0	0.0	0.0	0.0	0.0	0.0	0.0	0.0	0.0	0.0	0.0	0.0
NUCKS1	64710	symbol	H. sapiens	64710	H. sapiens	0.0	0.0	0.0	0.0	1.0	0.0	0.0	0.0	0.0	0.0	1.0	0.0	0.0	0.0	0.0	0.0	0.0	0.0	0.0	0.0
UCK2	7371	symbol	H. sapiens	7371	H. sapiens	0.0	0.0	1.0	0.0	0.0	0.0	0.0	0.0	0.0	0.0	0.0	0.0	0.0	0.0	0.0	0.0	0.0	0.0	0.0	0.0
PTPRK	5796	symbol	H. sapiens	5796	H. sapiens	0.0	1.0	0.0	0.0	0.0	0.0	0.0	0.0	0.0	0.0	0.0	0.0	0.0	1.0	0.0	0.0	0.0	0.0	0.0	0.0
UROS	7390	symbol	H. sapiens	7390	H. sapiens	0.0	0.0	1.0	0.0	0.0	0.0	0.0	0.0	0.0	0.0	0.0	0.0	0.0	0.0	0.0	0.0	0.0	0.0	0.0	1.0
GFRA1	2674	symbol	H. sapiens	2674	H. sapiens	0.0	0.0	0.0	0.0	0.0	0.0	0.0	0.0	0.0	0.0	0.0	0.0	0.0	0.0	1.0	0.0	0.0	1.0	0.0	0.0
STMN3	50861	symbol	H. sapiens	50861	H. sapiens	0.0	0.0	0.0	0.0	0.0	0.0	1.0	1.0	1.0	0.0	0.0	0.0	0.0	0.0	0.0	0.0	0.0	0.0	0.0	0.0
DIDO1	11083	symbol	H. sapiens	11083	H. sapiens	0.0	0.0	0.0	0.0	0.0	0.0	0.0	0.0	0.0	0.0	0.0	0.0	0.0	0.0	0.0	0.0	0.0	0.0	0.0	0.0
RTL8A	26071	symbol	H. sapiens	26071	H. sapiens	0.0	0.0	0.0	0.0	0.0	0.0	0.0	0.0	0.0	0.0	0.0	0.0	0.0	0.0	0.0	0.0	0.0	0.0	0.0	0.0
MMS19	64210	symbol	H. sapiens	64210	H. sapiens	1.0	0.0	1.0	0.0	1.0	0.0	0.0	0.0	0.0	0.0	0.0	0.0	0.0	0.0	0.0	0.0	0.0	0.0	0.0	0.0
NOC3L	64318	symbol	H. sapiens	64318	H. sapiens	0.0	0.0	0.0	0.0	0.0	0.0	0.0	0.0	0.0	0.0	0.0	0.0	0.0	0.0	0.0	0.0	0.0	0.0	0.0	0.0
COL5A1	1289	symbol	H. sapiens	1289	H. sapiens	0.0	0.0	0.0	0.0	0.0	0.0	1.0	1.0	0.0	0.0	0.0	0.0	0.0	0.0	0.0	0.0	0.0	0.0	0.0	0.0
PREX1	57580	symbol	H. sapiens	57580	H. sapiens	0.0	0.0	0.0	0.0	0.0	0.0	1.0	0.0	0.0	0.0	0.0	0.0	0.0	1.0	0.0	0.0	0.0	1.0	0.0	0.0
CLSPN	63967	symbol	H. sapiens	63967	H. sapiens	0.0	1.0	0.0	0.0	1.0	0.0	0.0	0.0	0.0	0.0	0.0	0.0	0.0	0.0	0.0	1.0	0.0	0.0	0.0	0.0
ZFAND3	60685	symbol	H. sapiens	60685	H. sapiens	0.0	0.0	0.0	0.0	0.0	0.0	0.0	0.0	0.0	0.0	0.0	0.0	0.0	0.0	0.0	0.0	0.0	0.0	0.0	0.0
ABCB7	22	symbol	H. sapiens	22	H. sapiens	0.0	0.0	0.0	0.0	0.0	0.0	0.0	0.0	0.0	0.0	0.0	0.0	0.0	0.0	0.0	0.0	0.0	0.0	0.0	0.0
PIM1	5292	symbol	H. sapiens	5292	H. sapiens	0.0	0.0	0.0	0.0	0.0	0.0	0.0	0.0	0.0	0.0	0.0	0.0	0.0	0.0	0.0	1.0	0.0	0.0	0.0	0.0
NKAIN1	79570	symbol	H. sapiens	79570	H. sapiens	0.0	0.0	0.0	0.0	0.0	0.0	0.0	0.0	0.0	0.0	0.0	0.0	0.0	0.0	0.0	0.0	0.0	0.0	0.0	0.0
UBXN11	91544	symbol	H. sapiens	91544	H. sapiens	0.0	0.0	0.0	0.0	0.0	0.0	0.0	0.0	0.0	0.0	0.0	1.0	0.0	0.0	0.0	0.0	0.0	0.0	0.0	0.0
ZNF32	7580	symbol	H. sapiens	7580	H. sapiens	0.0	0.0	0.0	0.0	0.0	0.0	0.0	0.0	0.0	0.0	0.0	0.0	0.0	0.0	0.0	0.0	0.0	0.0	0.0	0.0
RBM3	5935	symbol	H. sapiens	5935	H. sapiens	0.0	0.0	1.0	0.0	0.0	1.0	0.0	0.0	0.0	0.0	0.0	0.0	0.0	0.0	0.0	0.0	0.0	0.0	0.0	0.0
IRF3	3661	symbol	H. sapiens	3661	H. sapiens	0.0	0.0	0.0	0.0	0.0	0.0	0.0	0.0	0.0	0.0	0.0	0.0	0.0	0.0	0.0	0.0	0.0	0.0	0.0	0.0
POLA1	5422	symbol	H. sapiens	5422	H. sapiens	0.0	1.0	0.0	0.0	1.0	0.0	0.0	0.0	0.0	0.0	0.0	0.0	0.0	0.0	0.0	0.0	0.0	0.0	0.0	0.0
EIF1AX	1964	symbol	H. sapiens	1964	H. sapiens	0.0	0.0	0.0	0.0	0.0	1.0	0.0	0.0	0.0	0.0	1.0	0.0	0.0	0.0	0.0	0.0	0.0	0.0	0.0	0.0
PFKFB3	5209	symbol	H. sapiens	5209	H. sapiens	0.0	0.0	1.0	0.0	0.0	0.0	0.0	0.0	0.0	0.0	1.0	1.0	0.0	0.0	0.0	0.0	1.0	0.0	0.0	0.0
IL15RA	3601	symbol	H. sapiens	3601	H. sapiens	0.0	0.0	0.0	0.0	0.0	0.0	0.0	0.0	0.0	0.0	0.0	0.0	0.0	0.0	0.0	0.0	0.0	0.0	0.0	0.0
EEF1AKMT1	221143	symbol	H. sapiens	221143	H. sapiens	0.0	0.0	0.0	0.0	0.0	0.0	0.0	0.0	0.0	0.0	0.0	0.0	1.0	0.0	0.0	0.0	0.0	0.0	0.0	0.0
TMEM241	85019	symbol	H. sapiens	85019	H. sapiens	0.0	0.0	0.0	0.0	0.0	0.0	0.0	0.0	0.0	0.0	0.0	0.0	0.0	0.0	0.0	0.0	0.0	0.0	0.0	0.0
DNM2	1785	symbol	H. sapiens	1785	H. sapiens	1.0	1.0	1.0	0.0	0.0	0.0	1.0	0.0	0.0	0.0	0.0	0.0	0.0	1.0	0.0	0.0	0.0	1.0	0.0	0.0
AFDN	4301	symbol	H. sapiens	4301	H. sapiens	0.0	0.0	0.0	0.0	0.0	0.0	0.0	0.0	0.0	0.0	1.0	0.0	0.0	1.0	0.0	0.0	0.0	0.0	0.0	0.0
PKIB	5570	symbol	H. sapiens	5570	H. sapiens	0.0	0.0	0.0	0.0	1.0	0.0	1.0	0.0	0.0	0.0	0.0	0.0	0.0	0.0	0.0	0.0	0.0	0.0	0.0	0.0
MXI1	4601	symbol	H. sapiens	4601	H. sapiens	0.0	0.0	0.0	0.0	0.0	0.0	0.0	0.0	0.0	0.0	0.0	0.0	0.0	0.0	0.0	0.0	0.0	0.0	0.0	0.0
BCL2L11	10018	symbol	H. sapiens	10018	H. sapiens	1.0	0.0	0.0	0.0	1.0	0.0	1.0	1.0	0.0	0.0	1.0	1.0	0.0	1.0	0.0	0.0	0.0	0.0	0.0	0.0
PHYKPL	85007	symbol	H. sapiens	85007	H. sapiens	0.0	0.0	0.0	0.0	0.0	0.0	0.0	0.0	0.0	0.0	0.0	0.0	0.0	0.0	0.0	0.0	0.0	0.0	1.0	0.0
LARS1	51520	symbol	H. sapiens	51520	H. sapiens	0.0	0.0	0.0	0.0	0.0	1.0	0.0	0.0	0.0	0.0	1.0	0.0	0.0	0.0	0.0	0.0	0.0	0.0	0.0	0.0
CELF1	10658	symbol	H. sapiens	10658	H. sapiens	0.0	0.0	0.0	0.0	0.0	1.0	0.0	1.0	0.0	0.0	0.0	0.0	0.0	0.0	0.0	0.0	0.0	0.0	0.0	0.0
BMP7	655	symbol	H. sapiens	655	H. sapiens	1.0	1.0	0.0	0.0	1.0	0.0	1.0	1.0	0.0	0.0	0.0	0.0	0.0	1.0	0.0	0.0	0.0	1.0	0.0	0.0
AURKA	6790	symbol	H. sapiens	6790	H. sapiens	1.0	1.0	0.0	1.0	0.0	0.0	1.0	1.0	1.0	1.0	0.0	1.0	0.0	0.0	0.0	1.0	0.0	1.0	0.0	0.0
GEM	2669	symbol	H. sapiens	2669	H. sapiens	1.0	0.0	0.0	0.0	0.0	0.0	0.0	0.0	0.0	0.0	0.0	0.0	0.0	0.0	0.0	0.0	0.0	0.0	0.0	0.0
BCL2	596	symbol	H. sapiens	596	H. sapiens	0.0	1.0	1.0	0.0	1.0	0.0	1.0	1.0	0.0	1.0	1.0	0.0	0.0	1.0	0.0	1.0	0.0	1.0	0.0	1.0
USP34	9736	symbol	H. sapiens	9736	H. sapiens	0.0	0.0	0.0	0.0	0.0	0.0	0.0	0.0	0.0	0.0	0.0	1.0	0.0	0.0	0.0	0.0	0.0	0.0	0.0	0.0
RPRD1A	55197	symbol	H. sapiens	55197	H. sapiens	0.0	0.0	0.0	0.0	0.0	0.0	0.0	0.0	0.0	0.0	0.0	0.0	0.0	0.0	0.0	0.0	0.0	0.0	0.0	0.0
SMARCE1	6605	symbol	H. sapiens	6605	H. sapiens	0.0	0.0	0.0	0.0	0.0	0.0	0.0	0.0	0.0	0.0	0.0	0.0	0.0	0.0	0.0	0.0	0.0	0.0	0.0	0.0
KMT5B	51111	symbol	H. sapiens	51111	H. sapiens	0.0	0.0	0.0	0.0	0.0	0.0	0.0	0.0	0.0	0.0	0.0	0.0	1.0	0.0	0.0	0.0	0.0	0.0	0.0	0.0
RPL3	6122	symbol	H. sapiens	6122	H. sapiens	0.0	0.0	0.0	0.0	0.0	1.0	0.0	0.0	0.0	0.0	1.0	0.0	0.0	0.0	0.0	0.0	0.0	0.0	0.0	0.0
TEAD3	7005	symbol	H. sapiens	7005	H. sapiens	0.0	0.0	0.0	1.0	0.0	0.0	0.0	0.0	0.0	0.0	0.0	0.0	0.0	0.0	0.0	0.0	0.0	0.0	0.0	0.0
THADA	63892	symbol	H. sapiens	63892	H. sapiens	0.0	0.0	0.0	0.0	0.0	0.0	0.0	0.0	0.0	0.0	0.0	0.0	1.0	0.0	0.0	0.0	0.0	0.0	0.0	0.0
CGREF1	10669	symbol	H. sapiens	10669	H. sapiens	0.0	1.0	0.0	0.0	0.0	0.0	0.0	0.0	0.0	0.0	0.0	0.0	0.0	0.0	0.0	0.0	0.0	0.0	0.0	0.0
PRDM2	7799	symbol	H. sapiens	7799	H. sapiens	0.0	0.0	0.0	0.0	0.0	0.0	0.0	0.0	0.0	0.0	0.0	0.0	1.0	0.0	0.0	1.0	0.0	0.0	0.0	0.0
HES6	55502	symbol	H. sapiens	55502	H. sapiens	0.0	0.0	0.0	0.0	0.0	0.0	0.0	0.0	0.0	0.0	0.0	0.0	0.0	0.0	0.0	0.0	0.0	0.0	0.0	0.0
NCKAP5	344148	symbol	H. sapiens	344148	H. sapiens	0.0	0.0	0.0	0.0	0.0	0.0	1.0	0.0	1.0	0.0	0.0	0.0	0.0	0.0	0.0	0.0	0.0	0.0	0.0	0.0
MIR4435-2HG	541471	symbol	H. sapiens	541471	H. sapiens	0.0	0.0	0.0	0.0	0.0	0.0	0.0	0.0	0.0	0.0	0.0	0.0	0.0	0.0	0.0	0.0	0.0	0.0	0.0	0.0
CPNE1	8904	symbol	H. sapiens	8904	H. sapiens	0.0	0.0	1.0	0.0	0.0	0.0	0.0	0.0	0.0	0.0	0.0	0.0	0.0	0.0	0.0	0.0	0.0	1.0	0.0	0.0
FBXL5	26234	symbol	H. sapiens	26234	H. sapiens	0.0	0.0	0.0	0.0	0.0	0.0	0.0	0.0	0.0	0.0	0.0	1.0	0.0	0.0	0.0	0.0	0.0	0.0	0.0	0.0
SEPTIN5	5413	symbol	H. sapiens	5413	H. sapiens	0.0	0.0	0.0	1.0	0.0	0.0	0.0	0.0	0.0	0.0	0.0	0.0	0.0	0.0	0.0	0.0	0.0	0.0	0.0	0.0
IP6K2	51447	symbol	H. sapiens	51447	H. sapiens	0.0	0.0	1.0	0.0	0.0	0.0	0.0	0.0	0.0	0.0	0.0	0.0	0.0	1.0	0.0	0.0	0.0	0.0	0.0	0.0
SMYD5	10322	symbol	H. sapiens	10322	H. sapiens	0.0	0.0	0.0	0.0	0.0	0.0	0.0	0.0	0.0	0.0	0.0	0.0	1.0	0.0	0.0	0.0	0.0	0.0	0.0	0.0
GHDC	84514	symbol	H. sapiens	84514	H. sapiens	0.0	0.0	0.0	0.0	0.0	0.0	0.0	0.0	0.0	0.0	0.0	0.0	0.0	0.0	0.0	0.0	0.0	0.0	0.0	0.0
NUSAP1	51203	symbol	H. sapiens	51203	H. sapiens	1.0	1.0	0.0	1.0	0.0	0.0	1.0	0.0	1.0	0.0	0.0	0.0	0.0	0.0	0.0	0.0	0.0	0.0	0.0	0.0
PDZK1	5174	symbol	H. sapiens	5174	H. sapiens	0.0	0.0	0.0	0.0	0.0	0.0	0.0	0.0	0.0	0.0	1.0	0.0	0.0	0.0	0.0	0.0	0.0	0.0	0.0	0.0
DDX19A	55308	symbol	H. sapiens	55308	H. sapiens	0.0	0.0	1.0	0.0	0.0	0.0	0.0	0.0	0.0	0.0	0.0	0.0	0.0	0.0	0.0	0.0	0.0	0.0	0.0	0.0
FKBP9	11328	symbol	H. sapiens	11328	H. sapiens	0.0	0.0	0.0	0.0	0.0	0.0	0.0	0.0	0.0	0.0	0.0	0.0	0.0	0.0	0.0	0.0	0.0	0.0	0.0	0.0
TCP1	6950	symbol	H. sapiens	6950	H. sapiens	0.0	0.0	1.0	0.0	1.0	0.0	1.0	0.0	0.0	0.0	1.0	0.0	0.0	0.0	0.0	0.0	0.0	0.0	0.0	0.0
RAD51C	5889	symbol	H. sapiens	5889	H. sapiens	1.0	1.0	0.0	0.0	1.0	0.0	0.0	0.0	0.0	1.0	0.0	0.0	0.0	0.0	0.0	0.0	0.0	0.0	0.0	0.0
PRRC2B	84726	symbol	H. sapiens	84726	H. sapiens	0.0	0.0	0.0	0.0	0.0	0.0	0.0	0.0	0.0	0.0	0.0	0.0	0.0	0.0	0.0	0.0	0.0	0.0	0.0	0.0
DSCAM-AS1	100506492	symbol	H. sapiens	100506492	H. sapiens	0.0	0.0	0.0	0.0	0.0	0.0	0.0	0.0	0.0	0.0	0.0	0.0	0.0	0.0	0.0	0.0	0.0	0.0	0.0	0.0
TOP2A	7153	symbol	H. sapiens	7153	H. sapiens	1.0	1.0	0.0	1.0	1.0	0.0	0.0	0.0	0.0	1.0	0.0	0.0	0.0	1.0	0.0	0.0	0.0	0.0	0.0	0.0
AL391832.2						nan	nan	nan	nan	nan	nan	nan	nan	nan	nan	nan	nan	nan	nan	nan	nan	nan	nan	nan	nan
RPL39P3	285785	symbol	H. sapiens	285785	H. sapiens	0.0	0.0	0.0	0.0	0.0	0.0	0.0	0.0	0.0	0.0	0.0	0.0	0.0	0.0	0.0	0.0	0.0	0.0	0.0	0.0
SYCP2	10388	symbol	H. sapiens	10388	H. sapiens	1.0	0.0	0.0	1.0	0.0	0.0	0.0	1.0	0.0	1.0	0.0	0.0	0.0	0.0	0.0	0.0	0.0	0.0	0.0	0.0
PSMD4	5710	symbol	H. sapiens	5710	H. sapiens	0.0	1.0	0.0	0.0	0.0	0.0	0.0	1.0	0.0	0.0	1.0	1.0	0.0	0.0	0.0	0.0	0.0	0.0	0.0	0.0
SNX13	23161	symbol	H. sapiens	23161	H. sapiens	0.0	0.0	0.0	0.0	0.0	0.0	0.0	0.0	0.0	0.0	0.0	0.0	0.0	0.0	0.0	0.0	0.0	0.0	0.0	0.0
JTB	10899	symbol	H. sapiens	10899	H. sapiens	0.0	0.0	0.0	1.0	0.0	0.0	0.0	0.0	0.0	0.0	0.0	0.0	0.0	0.0	0.0	0.0	0.0	0.0	0.0	0.0
AC009495.1						nan	nan	nan	nan	nan	nan	nan	nan	nan	nan	nan	nan	nan	nan	nan	nan	nan	nan	nan	nan
CENPN	55839	symbol	H. sapiens	55839	H. sapiens	1.0	0.0	0.0	0.0	0.0	0.0	0.0	0.0	0.0	0.0	0.0	0.0	0.0	0.0	0.0	0.0	0.0	0.0	0.0	0.0
AP1S1	1174	symbol	H. sapiens	1174	H. sapiens	0.0	0.0	0.0	0.0	0.0	0.0	0.0	0.0	0.0	0.0	0.0	0.0	0.0	0.0	0.0	0.0	0.0	0.0	0.0	0.0
RFNG	5986	symbol	H. sapiens	5986	H. sapiens	0.0	0.0	1.0	0.0	0.0	0.0	0.0	0.0	0.0	0.0	0.0	0.0	0.0	0.0	0.0	0.0	0.0	0.0	0.0	0.0
LSM14A	26065	symbol	H. sapiens	26065	H. sapiens	0.0	0.0	0.0	0.0	0.0	1.0	0.0	0.0	0.0	0.0	0.0	0.0	0.0	0.0	0.0	0.0	0.0	0.0	0.0	0.0
LINC01441	101927796	symbol	H. sapiens	101927796	H. sapiens	0.0	0.0	0.0	0.0	0.0	0.0	0.0	0.0	0.0	0.0	0.0	0.0	0.0	0.0	0.0	0.0	0.0	0.0	0.0	0.0
ANKHD1	54882	symbol	H. sapiens	54882	H. sapiens	0.0	0.0	0.0	0.0	0.0	0.0	0.0	0.0	0.0	0.0	0.0	0.0	0.0	0.0	0.0	0.0	0.0	0.0	0.0	0.0
RPSAP12	387867	symbol	H. sapiens	387867	H. sapiens	0.0	0.0	0.0	0.0	0.0	0.0	0.0	0.0	0.0	0.0	0.0	0.0	0.0	0.0	0.0	0.0	0.0	0.0	0.0	0.0
BCS1L	617	symbol	H. sapiens	617	H. sapiens	0.0	0.0	0.0	0.0	0.0	0.0	0.0	0.0	0.0	0.0	0.0	0.0	0.0	0.0	0.0	0.0	1.0	0.0	0.0	0.0
NUP42	11097	symbol	H. sapiens	11097	H. sapiens	0.0	0.0	1.0	0.0	1.0	0.0	0.0	0.0	0.0	0.0	1.0	0.0	1.0	0.0	0.0	0.0	1.0	0.0	0.0	0.0
ZNF217	7764	symbol	H. sapiens	7764	H. sapiens	0.0	0.0	0.0	0.0	0.0	0.0	0.0	0.0	0.0	0.0	0.0	0.0	0.0	0.0	0.0	0.0	0.0	0.0	0.0	0.0
KMT5A	387893	symbol	H. sapiens	387893	H. sapiens	0.0	0.0	0.0	1.0	1.0	0.0	0.0	0.0	0.0	0.0	0.0	0.0	1.0	0.0	0.0	1.0	0.0	0.0	0.0	0.0
HP1BP3	50809	symbol	H. sapiens	50809	H. sapiens	0.0	0.0	0.0	0.0	0.0	0.0	0.0	0.0	0.0	0.0	0.0	0.0	0.0	0.0	0.0	0.0	0.0	0.0	0.0	0.0
TST	7263	symbol	H. sapiens	7263	H. sapiens	0.0	0.0	1.0	0.0	0.0	0.0	0.0	0.0	0.0	0.0	1.0	0.0	0.0	0.0	0.0	0.0	0.0	0.0	1.0	0.0
YIPF4	84272	symbol	H. sapiens	84272	H. sapiens	0.0	0.0	0.0	0.0	0.0	0.0	0.0	0.0	0.0	0.0	0.0	0.0	0.0	0.0	0.0	0.0	0.0	0.0	0.0	0.0
ZFAS1	441951	symbol	H. sapiens	441951	H. sapiens	0.0	0.0	0.0	0.0	0.0	0.0	0.0	0.0	0.0	0.0	0.0	0.0	0.0	0.0	0.0	0.0	0.0	0.0	0.0	0.0
FGF7P5	653453	symbol	H. sapiens	653453	H. sapiens	0.0	0.0	0.0	0.0	0.0	0.0	0.0	0.0	0.0	0.0	0.0	0.0	0.0	0.0	0.0	0.0	0.0	0.0	0.0	0.0
IMPDH2	3615	symbol	H. sapiens	3615	H. sapiens	0.0	0.0	1.0	0.0	0.0	0.0	0.0	0.0	0.0	0.0	0.0	0.0	0.0	0.0	0.0	0.0	0.0	0.0	0.0	0.0
GCSHP5	100329108	symbol	H. sapiens	100329108	H. sapiens	0.0	0.0	0.0	0.0	0.0	0.0	0.0	0.0	0.0	0.0	0.0	0.0	0.0	0.0	0.0	0.0	0.0	0.0	0.0	0.0
NME6	10201	symbol	H. sapiens	10201	H. sapiens	1.0	1.0	1.0	0.0	0.0	0.0	0.0	0.0	0.0	0.0	0.0	0.0	0.0	0.0	0.0	0.0	0.0	0.0	0.0	0.0
DONSON	29980	symbol	H. sapiens	29980	H. sapiens	0.0	1.0	0.0	0.0	1.0	0.0	0.0	0.0	0.0	0.0	0.0	0.0	0.0	0.0	0.0	0.0	0.0	0.0	0.0	0.0
NSUN5P2	260294	symbol	H. sapiens	260294	H. sapiens	0.0	0.0	0.0	0.0	0.0	0.0	0.0	0.0	0.0	0.0	1.0	0.0	1.0	0.0	0.0	0.0	0.0	0.0	0.0	0.0
HMGN5	79366	symbol	H. sapiens	79366	H. sapiens	1.0	1.0	0.0	0.0	0.0	0.0	0.0	0.0	0.0	0.0	0.0	0.0	0.0	0.0	0.0	0.0	0.0	0.0	0.0	0.0
DMTF1	9988	symbol	H. sapiens	9988	H. sapiens	0.0	0.0	0.0	0.0	0.0	0.0	0.0	0.0	0.0	0.0	0.0	0.0	0.0	0.0	0.0	0.0	0.0	0.0	0.0	0.0
GAS5	60674	symbol	H. sapiens	60674	H. sapiens	0.0	0.0	0.0	0.0	0.0	0.0	0.0	0.0	0.0	0.0	0.0	0.0	0.0	0.0	0.0	0.0	0.0	0.0	0.0	0.0
AL162151.2						nan	nan	nan	nan	nan	nan	nan	nan	nan	nan	nan	nan	nan	nan	nan	nan	nan	nan	nan	nan
TEDC1	283643	symbol	H. sapiens	283643	H. sapiens	0.0	0.0	0.0	0.0	0.0	0.0	0.0	0.0	0.0	0.0	0.0	0.0	0.0	0.0	0.0	0.0	0.0	0.0	0.0	0.0
GTF3C3	9330	symbol	H. sapiens	9330	H. sapiens	0.0	0.0	0.0	0.0	0.0	0.0	0.0	0.0	0.0	0.0	0.0	0.0	0.0	0.0	0.0	0.0	0.0	0.0	0.0	0.0
C15orf40	123207	symbol	H. sapiens	123207	H. sapiens	0.0	0.0	0.0	0.0	0.0	0.0	0.0	0.0	0.0	0.0	0.0	0.0	0.0	0.0	0.0	0.0	0.0	0.0	0.0	0.0
ARPC1B	10095	symbol	H. sapiens	10095	H. sapiens	0.0	0.0	0.0	0.0	0.0	0.0	1.0	0.0	0.0	0.0	0.0	0.0	0.0	0.0	0.0	0.0	0.0	0.0	0.0	0.0
KIF2C	11004	symbol	H. sapiens	11004	H. sapiens	1.0	0.0	0.0	1.0	0.0	0.0	1.0	0.0	1.0	0.0	0.0	0.0	0.0	0.0	0.0	0.0	0.0	0.0	0.0	0.0
MZT2B	80097	symbol	H. sapiens	80097	H. sapiens	0.0	0.0	0.0	0.0	0.0	0.0	0.0	0.0	0.0	0.0	0.0	0.0	0.0	0.0	0.0	0.0	0.0	0.0	0.0	0.0
FGFR2	2263	symbol	H. sapiens	2263	H. sapiens	1.0	0.0	0.0	1.0	0.0	0.0	0.0	1.0	0.0	0.0	0.0	0.0	0.0	1.0	0.0	1.0	0.0	1.0	0.0	0.0
BRPF1	7862	symbol	H. sapiens	7862	H. sapiens	0.0	0.0	0.0	0.0	0.0	0.0	0.0	0.0	0.0	0.0	0.0	0.0	1.0	0.0	0.0	1.0	0.0	0.0	0.0	0.0
OGDH	4967	symbol	H. sapiens	4967	H. sapiens	0.0	0.0	1.0	0.0	0.0	0.0	0.0	0.0	0.0	0.0	1.0	0.0	0.0	0.0	0.0	0.0	1.0	0.0	1.0	0.0
CREM	1390	symbol	H. sapiens	1390	H. sapiens	0.0	0.0	1.0	0.0	0.0	0.0	0.0	0.0	0.0	0.0	0.0	0.0	0.0	0.0	0.0	0.0	0.0	0.0	0.0	0.0
RPP14	11102	symbol	H. sapiens	11102	H. sapiens	0.0	0.0	0.0	0.0	0.0	0.0	0.0	0.0	0.0	0.0	0.0	0.0	0.0	0.0	0.0	0.0	0.0	0.0	0.0	0.0
PTPRG-AS1	100506994	symbol	H. sapiens	100506994	H. sapiens	0.0	0.0	0.0	0.0	0.0	0.0	0.0	0.0	0.0	0.0	0.0	0.0	0.0	0.0	0.0	0.0	0.0	0.0	0.0	0.0
MIPEP	4285	symbol	H. sapiens	4285	H. sapiens	0.0	0.0	0.0	0.0	0.0	0.0	0.0	0.0	0.0	0.0	1.0	0.0	0.0	0.0	0.0	0.0	0.0	0.0	0.0	0.0
RPS24	6229	symbol	H. sapiens	6229	H. sapiens	0.0	0.0	0.0	0.0	0.0	1.0	0.0	0.0	0.0	0.0	1.0	0.0	0.0	0.0	0.0	0.0	0.0	0.0	0.0	0.0
MYCBP	26292	symbol	H. sapiens	26292	H. sapiens	0.0	0.0	0.0	0.0	0.0	0.0	0.0	0.0	0.0	0.0	0.0	0.0	0.0	0.0	0.0	0.0	0.0	0.0	0.0	0.0
FLNB	2317	symbol	H. sapiens	2317	H. sapiens	0.0	0.0	0.0	0.0	0.0	0.0	0.0	0.0	0.0	0.0	0.0	0.0	0.0	0.0	0.0	0.0	0.0	1.0	0.0	0.0
CBWD5	220869	symbol	H. sapiens	220869	H. sapiens	0.0	0.0	0.0	0.0	0.0	0.0	0.0	0.0	0.0	0.0	0.0	0.0	0.0	0.0	0.0	0.0	0.0	0.0	0.0	0.0
RWDD1	51389	symbol	H. sapiens	51389	H. sapiens	0.0	0.0	0.0	0.0	0.0	1.0	0.0	0.0	0.0	0.0	0.0	0.0	0.0	0.0	0.0	1.0	0.0	0.0	0.0	0.0
PUM3	9933	symbol	H. sapiens	9933	H. sapiens	0.0	0.0	0.0	0.0	0.0	0.0	0.0	0.0	0.0	0.0	0.0	0.0	0.0	0.0	0.0	0.0	0.0	0.0	0.0	0.0
MFSD13A	79847	symbol	H. sapiens	79847	H. sapiens	0.0	0.0	0.0	0.0	0.0	0.0	0.0	0.0	0.0	0.0	0.0	0.0	0.0	0.0	0.0	0.0	0.0	0.0	0.0	0.0
SRRT	51593	symbol	H. sapiens	51593	H. sapiens	0.0	0.0	0.0	0.0	0.0	0.0	0.0	0.0	0.0	0.0	0.0	0.0	0.0	0.0	0.0	0.0	0.0	0.0	0.0	0.0
AP5Z1	9907	symbol	H. sapiens	9907	H. sapiens	0.0	0.0	0.0	0.0	1.0	0.0	0.0	0.0	0.0	0.0	0.0	0.0	0.0	0.0	0.0	0.0	0.0	0.0	0.0	0.0
EPHA6	285220	symbol	H. sapiens	285220	H. sapiens	0.0	0.0	0.0	0.0	0.0	0.0	0.0	0.0	0.0	0.0	0.0	0.0	0.0	0.0	0.0	0.0	0.0	1.0	0.0	0.0
TTF2	8458	symbol	H. sapiens	8458	H. sapiens	0.0	0.0	0.0	0.0	0.0	0.0	0.0	0.0	0.0	0.0	0.0	0.0	0.0	0.0	0.0	0.0	0.0	0.0	0.0	0.0
PDXK	8566	symbol	H. sapiens	8566	H. sapiens	0.0	0.0	1.0	0.0	0.0	0.0	0.0	0.0	0.0	0.0	0.0	0.0	0.0	0.0	0.0	0.0	0.0	0.0	0.0	0.0
BX005266.1						nan	nan	nan	nan	nan	nan	nan	nan	nan	nan	nan	nan	nan	nan	nan	nan	nan	nan	nan	nan
FAM160B2	64760	symbol	H. sapiens	64760	H. sapiens	0.0	0.0	0.0	0.0	0.0	0.0	0.0	0.0	0.0	0.0	0.0	0.0	0.0	0.0	0.0	0.0	0.0	0.0	0.0	0.0
SNHG29	125144	symbol	H. sapiens	125144	H. sapiens	0.0	0.0	0.0	0.0	0.0	0.0	0.0	0.0	0.0	0.0	0.0	0.0	0.0	0.0	0.0	0.0	0.0	0.0	0.0	0.0
USP22	23326	symbol	H. sapiens	23326	H. sapiens	1.0	1.0	0.0	0.0	0.0	0.0	0.0	1.0	0.0	0.0	0.0	1.0	1.0	0.0	0.0	0.0	0.0	0.0	0.0	0.0
NDUFA10	4705	symbol	H. sapiens	4705	H. sapiens	0.0	0.0	1.0	0.0	0.0	0.0	0.0	0.0	0.0	0.0	0.0	0.0	0.0	0.0	0.0	0.0	1.0	0.0	0.0	0.0
AC091390.5						nan	nan	nan	nan	nan	nan	nan	nan	nan	nan	nan	nan	nan	nan	nan	nan	nan	nan	nan	nan
TAZ	6901	symbol	H. sapiens	6901	H. sapiens	0.0	0.0	1.0	0.0	0.0	0.0	0.0	0.0	0.0	0.0	0.0	0.0	0.0	0.0	0.0	0.0	1.0	0.0	0.0	0.0
NAA16	79612	symbol	H. sapiens	79612	H. sapiens	0.0	0.0	0.0	0.0	0.0	0.0	0.0	0.0	0.0	0.0	0.0	0.0	0.0	0.0	0.0	0.0	0.0	0.0	0.0	0.0
RPL14	9045	symbol	H. sapiens	9045	H. sapiens	0.0	0.0	0.0	0.0	0.0	1.0	0.0	0.0	0.0	0.0	1.0	0.0	0.0	0.0	0.0	0.0	0.0	0.0	0.0	0.0
GLT8D1	55830	symbol	H. sapiens	55830	H. sapiens	0.0	0.0	0.0	0.0	0.0	0.0	0.0	0.0	0.0	0.0	0.0	0.0	0.0	0.0	0.0	0.0	0.0	0.0	0.0	0.0
CCNL2	81669	symbol	H. sapiens	81669	H. sapiens	0.0	0.0	0.0	0.0	0.0	0.0	0.0	0.0	0.0	0.0	0.0	0.0	0.0	0.0	0.0	0.0	0.0	0.0	0.0	0.0
RPL21	6144	symbol	H. sapiens	6144	H. sapiens	0.0	0.0	0.0	0.0	0.0	1.0	0.0	0.0	0.0	0.0	1.0	0.0	0.0	0.0	0.0	0.0	0.0	0.0	0.0	0.0
PTCD3	55037	symbol	H. sapiens	55037	H. sapiens	0.0	0.0	0.0	0.0	0.0	1.0	0.0	0.0	0.0	0.0	0.0	0.0	0.0	0.0	0.0	0.0	0.0	0.0	0.0	0.0
MICOS10	440574	symbol	H. sapiens	440574	H. sapiens	0.0	0.0	0.0	0.0	0.0	0.0	0.0	0.0	0.0	0.0	0.0	0.0	0.0	0.0	0.0	0.0	0.0	0.0	0.0	0.0
PHF20	51230	symbol	H. sapiens	51230	H. sapiens	0.0	0.0	0.0	0.0	0.0	0.0	0.0	0.0	0.0	0.0	0.0	0.0	1.0	0.0	0.0	1.0	0.0	0.0	0.0	0.0
ALDH7A1	501	symbol	H. sapiens	501	H. sapiens	0.0	0.0	0.0	0.0	0.0	0.0	0.0	0.0	0.0	0.0	0.0	0.0	0.0	0.0	0.0	0.0	0.0	0.0	1.0	0.0
B4GALT3	8703	symbol	H. sapiens	8703	H. sapiens	0.0	0.0	1.0	0.0	0.0	0.0	0.0	0.0	0.0	0.0	0.0	0.0	0.0	0.0	0.0	0.0	0.0	0.0	0.0	0.0
CHAC1	79094	symbol	H. sapiens	79094	H. sapiens	0.0	0.0	1.0	0.0	0.0	1.0	0.0	0.0	0.0	0.0	0.0	0.0	0.0	0.0	0.0	0.0	0.0	0.0	1.0	0.0
FAM189B	10712	symbol	H. sapiens	10712	H. sapiens	0.0	0.0	0.0	0.0	0.0	0.0	0.0	0.0	0.0	0.0	0.0	0.0	0.0	0.0	0.0	0.0	0.0	0.0	0.0	0.0
GNAS	2778	symbol	H. sapiens	2778	H. sapiens	0.0	0.0	0.0	0.0	0.0	0.0	0.0	1.0	0.0	0.0	0.0	0.0	1.0	0.0	0.0	0.0	1.0	0.0	0.0	0.0
FAF1	11124	symbol	H. sapiens	11124	H. sapiens	0.0	0.0	0.0	0.0	1.0	0.0	1.0	0.0	0.0	0.0	0.0	1.0	0.0	1.0	0.0	0.0	0.0	0.0	0.0	0.0
SNRPG	6637	symbol	H. sapiens	6637	H. sapiens	0.0	0.0	0.0	0.0	0.0	0.0	0.0	0.0	0.0	0.0	0.0	0.0	0.0	0.0	0.0	0.0	0.0	0.0	0.0	0.0
PATJ	10207	symbol	H. sapiens	10207	H. sapiens	0.0	0.0	0.0	0.0	0.0	0.0	0.0	0.0	0.0	0.0	0.0	0.0	0.0	1.0	0.0	0.0	0.0	0.0	0.0	0.0
CMSS1	84319	symbol	H. sapiens	84319	H. sapiens	0.0	0.0	0.0	0.0	0.0	0.0	0.0	0.0	0.0	0.0	0.0	0.0	0.0	0.0	0.0	0.0	0.0	0.0	0.0	0.0
HIVEP3	59269	symbol	H. sapiens	59269	H. sapiens	0.0	0.0	0.0	0.0	0.0	0.0	0.0	0.0	0.0	0.0	0.0	0.0	0.0	0.0	0.0	0.0	0.0	0.0	0.0	0.0
POLD2	5425	symbol	H. sapiens	5425	H. sapiens	0.0	0.0	0.0	0.0	1.0	0.0	0.0	0.0	0.0	0.0	0.0	0.0	0.0	0.0	0.0	0.0	0.0	0.0	0.0	0.0
SMYD3	64754	symbol	H. sapiens	64754	H. sapiens	0.0	0.0	0.0	0.0	0.0	0.0	0.0	0.0	0.0	0.0	0.0	0.0	1.0	0.0	0.0	1.0	0.0	0.0	0.0	0.0
SNX5	27131	symbol	H. sapiens	27131	H. sapiens	0.0	0.0	0.0	0.0	0.0	0.0	0.0	0.0	0.0	0.0	0.0	1.0	0.0	0.0	0.0	0.0	0.0	0.0	0.0	0.0
DEFB109F	110806268	symbol	H. sapiens	110806268	H. sapiens	0.0	0.0	0.0	0.0	0.0	0.0	0.0	0.0	0.0	0.0	0.0	0.0	0.0	0.0	0.0	0.0	0.0	0.0	0.0	0.0
CCNY	219771	symbol	H. sapiens	219771	H. sapiens	1.0	1.0	0.0	1.0	0.0	0.0	0.0	0.0	0.0	0.0	0.0	0.0	0.0	0.0	0.0	0.0	0.0	0.0	0.0	0.0
PHF14	9678	symbol	H. sapiens	9678	H. sapiens	0.0	0.0	0.0	0.0	0.0	0.0	0.0	1.0	0.0	0.0	0.0	0.0	0.0	0.0	0.0	0.0	0.0	0.0	0.0	0.0
LPP	4026	symbol	H. sapiens	4026	H. sapiens	0.0	0.0	0.0	0.0	0.0	0.0	0.0	0.0	0.0	0.0	0.0	0.0	0.0	0.0	0.0	0.0	0.0	0.0	0.0	0.0
ZER1	10444	symbol	H. sapiens	10444	H. sapiens	0.0	0.0	0.0	0.0	0.0	0.0	0.0	0.0	0.0	0.0	0.0	0.0	0.0	0.0	0.0	0.0	0.0	0.0	0.0	0.0
ITGB1BP1	9270	symbol	H. sapiens	9270	H. sapiens	1.0	0.0	0.0	1.0	0.0	0.0	1.0	1.0	0.0	0.0	1.0	0.0	0.0	1.0	0.0	0.0	0.0	1.0	0.0	0.0
COMTD1	118881	symbol	H. sapiens	118881	H. sapiens	0.0	0.0	0.0	0.0	0.0	0.0	0.0	0.0	0.0	0.0	0.0	0.0	1.0	0.0	0.0	0.0	0.0	0.0	0.0	0.0
RPL24	6152	symbol	H. sapiens	6152	H. sapiens	1.0	1.0	0.0	0.0	0.0	1.0	0.0	0.0	0.0	0.0	1.0	0.0	0.0	0.0	0.0	0.0	0.0	1.0	0.0	0.0
GLMN	11146	symbol	H. sapiens	11146	H. sapiens	0.0	0.0	0.0	0.0	0.0	0.0	0.0	1.0	0.0	0.0	0.0	1.0	0.0	1.0	0.0	0.0	0.0	0.0	0.0	0.0
CBX3	11335	symbol	H. sapiens	11335	H. sapiens	0.0	1.0	0.0	0.0	0.0	0.0	0.0	0.0	0.0	0.0	0.0	0.0	0.0	0.0	0.0	0.0	0.0	0.0	0.0	0.0
THUMPD3-AS1	440944	symbol	H. sapiens	440944	H. sapiens	0.0	0.0	0.0	0.0	0.0	0.0	0.0	0.0	0.0	0.0	0.0	0.0	0.0	0.0	0.0	0.0	0.0	0.0	0.0	0.0
B3GALNT1	8706	symbol	H. sapiens	8706	H. sapiens	0.0	0.0	1.0	0.0	0.0	0.0	0.0	0.0	0.0	0.0	0.0	0.0	0.0	0.0	0.0	0.0	0.0	0.0	0.0	0.0
CLPTM1L	81037	symbol	H. sapiens	81037	H. sapiens	0.0	0.0	0.0	0.0	0.0	0.0	0.0	0.0	0.0	0.0	0.0	0.0	0.0	0.0	0.0	0.0	0.0	0.0	0.0	0.0
NLN	57486	symbol	H. sapiens	57486	H. sapiens	0.0	0.0	1.0	0.0	0.0	0.0	0.0	0.0	0.0	0.0	0.0	0.0	0.0	0.0	0.0	0.0	0.0	0.0	0.0	0.0
TGFBI	7045	symbol	H. sapiens	7045	H. sapiens	0.0	0.0	0.0	0.0	0.0	0.0	0.0	0.0	0.0	0.0	0.0	0.0	0.0	1.0	0.0	0.0	0.0	0.0	0.0	0.0
WDR19	57728	symbol	H. sapiens	57728	H. sapiens	0.0	0.0	1.0	0.0	0.0	0.0	0.0	1.0	1.0	0.0	1.0	0.0	0.0	0.0	0.0	0.0	0.0	0.0	0.0	0.0
PLK4	10733	symbol	H. sapiens	10733	H. sapiens	1.0	1.0	0.0	0.0	0.0	0.0	1.0	1.0	1.0	0.0	0.0	0.0	0.0	0.0	0.0	0.0	0.0	0.0	0.0	0.0
RHOBTB3	22836	symbol	H. sapiens	22836	H. sapiens	0.0	0.0	0.0	0.0	0.0	0.0	1.0	1.0	0.0	0.0	0.0	0.0	0.0	0.0	0.0	0.0	0.0	0.0	0.0	0.0
CCDC149	91050	symbol	H. sapiens	91050	H. sapiens	0.0	0.0	0.0	0.0	0.0	0.0	0.0	0.0	0.0	0.0	0.0	0.0	0.0	0.0	0.0	0.0	0.0	0.0	0.0	0.0
RMND5B	64777	symbol	H. sapiens	64777	H. sapiens	0.0	0.0	0.0	0.0	0.0	0.0	0.0	0.0	0.0	0.0	0.0	1.0	0.0	0.0	0.0	0.0	0.0	0.0	0.0	0.0
SELENOP	6414	symbol	H. sapiens	6414	H. sapiens	0.0	0.0	0.0	0.0	0.0	0.0	0.0	0.0	0.0	0.0	0.0	0.0	0.0	0.0	0.0	0.0	0.0	0.0	0.0	0.0
SNX14	57231	symbol	H. sapiens	57231	H. sapiens	0.0	0.0	0.0	0.0	0.0	0.0	0.0	0.0	0.0	0.0	0.0	0.0	0.0	0.0	0.0	0.0	0.0	0.0	0.0	0.0
TRIM36	55521	symbol	H. sapiens	55521	H. sapiens	0.0	0.0	0.0	1.0	0.0	0.0	1.0	0.0	1.0	0.0	0.0	0.0	0.0	0.0	0.0	0.0	0.0	0.0	0.0	0.0
ACAD10	80724	symbol	H. sapiens	80724	H. sapiens	0.0	0.0	0.0	0.0	0.0	0.0	0.0	0.0	0.0	0.0	0.0	0.0	0.0	0.0	0.0	0.0	0.0	0.0	0.0	0.0
WDR1	9948	symbol	H. sapiens	9948	H. sapiens	0.0	0.0	0.0	0.0	0.0	0.0	1.0	1.0	0.0	0.0	0.0	0.0	0.0	1.0	0.0	0.0	0.0	1.0	0.0	0.0
CHMP7	91782	symbol	H. sapiens	91782	H. sapiens	1.0	1.0	0.0	1.0	1.0	0.0	0.0	0.0	0.0	0.0	0.0	0.0	0.0	0.0	0.0	0.0	0.0	0.0	0.0	0.0
ZFAND1	79752	symbol	H. sapiens	79752	H. sapiens	0.0	0.0	1.0	0.0	0.0	0.0	0.0	0.0	0.0	0.0	0.0	0.0	0.0	0.0	0.0	0.0	0.0	0.0	0.0	0.0
PABPC1	26986	symbol	H. sapiens	26986	H. sapiens	0.0	0.0	0.0	0.0	0.0	1.0	0.0	0.0	0.0	0.0	1.0	1.0	0.0	0.0	0.0	0.0	0.0	0.0	0.0	0.0
SPIDR	23514	symbol	H. sapiens	23514	H. sapiens	0.0	0.0	0.0	0.0	1.0	0.0	1.0	0.0	0.0	0.0	1.0	0.0	0.0	0.0	0.0	0.0	0.0	0.0	0.0	0.0
RNF19A	25897	symbol	H. sapiens	25897	H. sapiens	0.0	0.0	0.0	0.0	0.0	0.0	0.0	0.0	1.0	0.0	0.0	1.0	0.0	0.0	0.0	0.0	0.0	0.0	0.0	0.0
PTK2	5747	symbol	H. sapiens	5747	H. sapiens	1.0	0.0	0.0	0.0	0.0	0.0	1.0	1.0	1.0	0.0	0.0	1.0	0.0	1.0	0.0	1.0	0.0	1.0	0.0	0.0
MATN2	4147	symbol	H. sapiens	4147	H. sapiens	0.0	0.0	0.0	0.0	0.0	0.0	0.0	1.0	0.0	0.0	0.0	0.0	0.0	0.0	0.0	0.0	0.0	1.0	0.0	0.0
MRPS28	28957	symbol	H. sapiens	28957	H. sapiens	0.0	0.0	0.0	0.0	0.0	1.0	0.0	0.0	0.0	0.0	0.0	0.0	0.0	0.0	0.0	0.0	0.0	0.0	0.0	0.0
GRHL2	79977	symbol	H. sapiens	79977	H. sapiens	0.0	0.0	0.0	0.0	1.0	0.0	0.0	1.0	0.0	0.0	0.0	0.0	1.0	1.0	0.0	0.0	0.0	1.0	0.0	0.0
NPIPB3	23117	symbol	H. sapiens	23117	H. sapiens	0.0	0.0	0.0	0.0	0.0	0.0	0.0	0.0	0.0	0.0	0.0	0.0	0.0	0.0	0.0	0.0	0.0	0.0	0.0	0.0
TATDN1	83940	symbol	H. sapiens	83940	H. sapiens	0.0	0.0	0.0	0.0	0.0	0.0	0.0	0.0	0.0	0.0	0.0	0.0	0.0	0.0	0.0	0.0	0.0	0.0	0.0	0.0
TRIQK	286144	symbol	H. sapiens	286144	H. sapiens	0.0	0.0	0.0	0.0	0.0	0.0	0.0	0.0	0.0	0.0	0.0	0.0	0.0	0.0	0.0	0.0	0.0	0.0	0.0	0.0
TM2D2	83877	symbol	H. sapiens	83877	H. sapiens	0.0	0.0	0.0	0.0	0.0	0.0	0.0	0.0	0.0	0.0	0.0	0.0	0.0	0.0	0.0	0.0	0.0	0.0	0.0	0.0
GTF2H2	2966	symbol	H. sapiens	2966	H. sapiens	0.0	0.0	0.0	0.0	1.0	0.0	1.0	0.0	0.0	0.0	0.0	0.0	0.0	0.0	0.0	0.0	0.0	0.0	0.0	0.0
PLPBP	11212	symbol	H. sapiens	11212	H. sapiens	0.0	0.0	0.0	0.0	0.0	0.0	0.0	0.0	0.0	0.0	0.0	0.0	0.0	0.0	0.0	0.0	0.0	0.0	0.0	0.0
MRNIP	51149	symbol	H. sapiens	51149	H. sapiens	0.0	1.0	0.0	0.0	1.0	0.0	0.0	0.0	0.0	0.0	0.0	0.0	0.0	0.0	0.0	0.0	0.0	0.0	0.0	0.0
NDUFS8	4728	symbol	H. sapiens	4728	H. sapiens	0.0	0.0	1.0	0.0	0.0	0.0	0.0	0.0	0.0	0.0	0.0	0.0	0.0	0.0	0.0	0.0	1.0	0.0	0.0	0.0
ATM	472	symbol	H. sapiens	472	H. sapiens	1.0	1.0	1.0	0.0	1.0	0.0	1.0	1.0	0.0	1.0	1.0	1.0	0.0	1.0	0.0	1.0	0.0	0.0	0.0	0.0
GEN1	348654	symbol	H. sapiens	348654	H. sapiens	1.0	1.0	0.0	0.0	1.0	0.0	1.0	0.0	1.0	1.0	0.0	0.0	0.0	0.0	0.0	0.0	0.0	0.0	0.0	0.0
TAF1D	79101	symbol	H. sapiens	79101	H. sapiens	0.0	0.0	0.0	0.0	0.0	0.0	0.0	0.0	0.0	0.0	0.0	0.0	0.0	0.0	0.0	0.0	0.0	0.0	0.0	0.0
ZBTB44	29068	symbol	H. sapiens	29068	H. sapiens	0.0	0.0	0.0	0.0	0.0	0.0	0.0	0.0	0.0	0.0	0.0	0.0	0.0	0.0	0.0	0.0	0.0	0.0	0.0	0.0
DPH2	1802	symbol	H. sapiens	1802	H. sapiens	0.0	0.0	0.0	0.0	0.0	1.0	0.0	0.0	0.0	0.0	0.0	0.0	0.0	0.0	0.0	0.0	0.0	0.0	0.0	0.0
RNF170	81790	symbol	H. sapiens	81790	H. sapiens	0.0	0.0	0.0	0.0	0.0	0.0	0.0	0.0	0.0	0.0	0.0	0.0	0.0	0.0	0.0	0.0	0.0	0.0	0.0	0.0
BSCL2	26580	symbol	H. sapiens	26580	H. sapiens	0.0	0.0	0.0	0.0	0.0	0.0	0.0	0.0	0.0	0.0	0.0	0.0	0.0	0.0	0.0	0.0	0.0	0.0	0.0	0.0
SAA1	6288	symbol	H. sapiens	6288	H. sapiens	0.0	0.0	0.0	0.0	0.0	0.0	0.0	0.0	0.0	0.0	0.0	0.0	0.0	1.0	0.0	0.0	0.0	1.0	0.0	0.0
FIBP	9158	symbol	H. sapiens	9158	H. sapiens	0.0	0.0	0.0	0.0	0.0	0.0	0.0	0.0	0.0	0.0	0.0	0.0	0.0	0.0	0.0	0.0	0.0	0.0	0.0	0.0
MDK	4192	symbol	H. sapiens	4192	H. sapiens	0.0	0.0	0.0	1.0	0.0	0.0	1.0	1.0	0.0	1.0	0.0	0.0	0.0	1.0	0.0	1.0	0.0	1.0	0.0	0.0
BIRC2	329	symbol	H. sapiens	329	H. sapiens	1.0	0.0	0.0	0.0	0.0	0.0	0.0	1.0	0.0	0.0	0.0	1.0	0.0	1.0	0.0	0.0	0.0	0.0	0.0	0.0
NPEPPS	9520	symbol	H. sapiens	9520	H. sapiens	0.0	0.0	0.0	0.0	0.0	0.0	1.0	0.0	0.0	0.0	1.0	0.0	0.0	0.0	0.0	0.0	0.0	0.0	0.0	0.0
RNF10	9921	symbol	H. sapiens	9921	H. sapiens	0.0	0.0	0.0	0.0	0.0	0.0	0.0	0.0	0.0	0.0	0.0	0.0	0.0	0.0	0.0	0.0	0.0	0.0	0.0	0.0
SLC25A30	253512	symbol	H. sapiens	253512	H. sapiens	0.0	0.0	0.0	0.0	0.0	0.0	0.0	0.0	0.0	0.0	0.0	0.0	0.0	0.0	0.0	0.0	0.0	0.0	0.0	0.0
LDHA	3939	symbol	H. sapiens	3939	H. sapiens	0.0	0.0	1.0	0.0	0.0	0.0	0.0	0.0	0.0	0.0	1.0	0.0	0.0	1.0	0.0	0.0	1.0	0.0	0.0	0.0
CEP57	9702	symbol	H. sapiens	9702	H. sapiens	0.0	1.0	0.0	0.0	0.0	0.0	0.0	1.0	1.0	0.0	0.0	0.0	0.0	0.0	0.0	0.0	0.0	0.0	0.0	0.0
BTN2A1	11120	symbol	H. sapiens	11120	H. sapiens	0.0	0.0	0.0	0.0	0.0	0.0	0.0	0.0	0.0	0.0	0.0	0.0	0.0	0.0	0.0	0.0	0.0	0.0	0.0	0.0
STYK1	55359	symbol	H. sapiens	55359	H. sapiens	0.0	0.0	0.0	0.0	0.0	0.0	0.0	0.0	0.0	0.0	0.0	0.0	0.0	0.0	0.0	0.0	0.0	0.0	0.0	0.0
ANAPC15	25906	symbol	H. sapiens	25906	H. sapiens	1.0	1.0	0.0	1.0	0.0	0.0	0.0	0.0	0.0	0.0	0.0	1.0	0.0	0.0	0.0	0.0	0.0	0.0	0.0	0.0
MRPL51	51258	symbol	H. sapiens	51258	H. sapiens	0.0	0.0	0.0	0.0	0.0	1.0	0.0	0.0	0.0	0.0	0.0	0.0	0.0	0.0	0.0	0.0	0.0	0.0	0.0	0.0
ITFG1	81533	symbol	H. sapiens	81533	H. sapiens	0.0	0.0	0.0	0.0	0.0	0.0	0.0	0.0	0.0	0.0	0.0	0.0	0.0	0.0	0.0	0.0	0.0	0.0	0.0	0.0
TMEM132A	54972	symbol	H. sapiens	54972	H. sapiens	0.0	0.0	0.0	0.0	0.0	0.0	0.0	0.0	0.0	0.0	0.0	0.0	0.0	0.0	0.0	0.0	0.0	0.0	0.0	0.0
LAMTOR1	55004	symbol	H. sapiens	55004	H. sapiens	0.0	1.0	0.0	0.0	0.0	0.0	0.0	0.0	0.0	0.0	0.0	0.0	0.0	0.0	0.0	0.0	0.0	0.0	0.0	0.0
STK38L	23012	symbol	H. sapiens	23012	H. sapiens	0.0	0.0	0.0	0.0	0.0	0.0	0.0	0.0	0.0	0.0	0.0	0.0	0.0	0.0	0.0	1.0	0.0	0.0	0.0	0.0
NEK6	10783	symbol	H. sapiens	10783	H. sapiens	1.0	1.0	0.0	1.0	1.0	0.0	0.0	0.0	1.0	0.0	0.0	0.0	0.0	0.0	0.0	1.0	0.0	0.0	0.0	0.0
AK4	205	symbol	H. sapiens	205	H. sapiens	0.0	0.0	1.0	0.0	0.0	0.0	0.0	0.0	0.0	0.0	0.0	0.0	0.0	0.0	0.0	0.0	1.0	0.0	0.0	0.0
WASHC3	51019	symbol	H. sapiens	51019	H. sapiens	0.0	0.0	0.0	0.0	0.0	0.0	1.0	0.0	0.0	0.0	0.0	0.0	0.0	0.0	0.0	0.0	0.0	0.0	0.0	0.0
SIAE	54414	symbol	H. sapiens	54414	H. sapiens	0.0	0.0	1.0	0.0	0.0	0.0	0.0	0.0	0.0	0.0	0.0	0.0	0.0	0.0	0.0	0.0	0.0	0.0	0.0	0.0
MAPKAPK5	8550	symbol	H. sapiens	8550	H. sapiens	0.0	0.0	0.0	0.0	1.0	1.0	1.0	0.0	0.0	0.0	0.0	0.0	0.0	0.0	0.0	1.0	0.0	0.0	0.0	0.0
ZFC3H1	196441	symbol	H. sapiens	196441	H. sapiens	0.0	0.0	0.0	0.0	0.0	0.0	0.0	0.0	0.0	0.0	0.0	0.0	0.0	0.0	0.0	0.0	0.0	0.0	0.0	0.0
PRIM1	5557	symbol	H. sapiens	5557	H. sapiens	0.0	1.0	0.0	0.0	0.0	0.0	0.0	0.0	0.0	0.0	0.0	0.0	0.0	0.0	0.0	0.0	0.0	0.0	0.0	0.0
AAAS	8086	symbol	H. sapiens	8086	H. sapiens	1.0	0.0	1.0	0.0	1.0	0.0	0.0	0.0	1.0	0.0	1.0	0.0	1.0	0.0	0.0	0.0	1.0	0.0	0.0	0.0
LETMD1	25875	symbol	H. sapiens	25875	H. sapiens	0.0	0.0	0.0	0.0	0.0	0.0	0.0	0.0	0.0	0.0	0.0	0.0	0.0	0.0	0.0	0.0	0.0	0.0	0.0	0.0
PRR13	54458	symbol	H. sapiens	54458	H. sapiens	0.0	0.0	0.0	0.0	0.0	0.0	0.0	0.0	0.0	0.0	0.0	0.0	0.0	0.0	0.0	0.0	0.0	0.0	0.0	0.0
MYL6B	140465	symbol	H. sapiens	140465	H. sapiens	0.0	0.0	0.0	0.0	0.0	0.0	0.0	0.0	0.0	0.0	0.0	0.0	0.0	0.0	0.0	0.0	0.0	0.0	0.0	0.0
RAB3IP	117177	symbol	H. sapiens	117177	H. sapiens	0.0	0.0	0.0	0.0	0.0	0.0	0.0	0.0	0.0	0.0	1.0	0.0	0.0	0.0	0.0	0.0	0.0	0.0	0.0	0.0
NDRG2	57447	symbol	H. sapiens	57447	H. sapiens	0.0	0.0	0.0	0.0	0.0	0.0	0.0	0.0	0.0	0.0	0.0	0.0	0.0	0.0	0.0	0.0	0.0	0.0	0.0	0.0
GNPNAT1	64841	symbol	H. sapiens	64841	H. sapiens	0.0	0.0	1.0	0.0	0.0	0.0	0.0	0.0	0.0	0.0	0.0	0.0	0.0	0.0	0.0	0.0	0.0	0.0	0.0	0.0
SNHG10	283596	symbol	H. sapiens	283596	H. sapiens	0.0	0.0	0.0	0.0	0.0	0.0	0.0	0.0	0.0	0.0	0.0	0.0	0.0	0.0	0.0	0.0	0.0	0.0	0.0	0.0
MTHFD1	4522	symbol	H. sapiens	4522	H. sapiens	0.0	0.0	1.0	0.0	0.0	0.0	0.0	1.0	0.0	0.0	0.0	0.0	0.0	0.0	0.0	0.0	0.0	0.0	1.0	1.0
NUMB	8650	symbol	H. sapiens	8650	H. sapiens	0.0	0.0	1.0	1.0	0.0	0.0	0.0	0.0	0.0	0.0	1.0	0.0	0.0	1.0	0.0	0.0	0.0	1.0	0.0	0.0
FNTB	2342	symbol	H. sapiens	2342	H. sapiens	0.0	0.0	0.0	0.0	0.0	0.0	0.0	0.0	0.0	0.0	0.0	0.0	0.0	0.0	0.0	0.0	0.0	0.0	0.0	0.0
SPG11	80208	symbol	H. sapiens	80208	H. sapiens	0.0	0.0	0.0	0.0	0.0	0.0	0.0	0.0	1.0	0.0	0.0	0.0	0.0	0.0	0.0	0.0	0.0	1.0	0.0	0.0
SEMA4B	10509	symbol	H. sapiens	10509	H. sapiens	1.0	0.0	0.0	0.0	0.0	0.0	0.0	0.0	0.0	0.0	0.0	0.0	0.0	1.0	0.0	0.0	0.0	1.0	0.0	0.0
WDR73	84942	symbol	H. sapiens	84942	H. sapiens	0.0	0.0	0.0	0.0	0.0	0.0	1.0	0.0	1.0	0.0	0.0	0.0	0.0	0.0	0.0	0.0	0.0	0.0	0.0	0.0
USP3	9960	symbol	H. sapiens	9960	H. sapiens	0.0	0.0	0.0	0.0	1.0	0.0	0.0	0.0	0.0	0.0	0.0	1.0	0.0	0.0	0.0	0.0	0.0	0.0	0.0	0.0
SMAD3	4088	symbol	H. sapiens	4088	H. sapiens	0.0	1.0	0.0	0.0	0.0	0.0	1.0	1.0	0.0	0.0	1.0	1.0	0.0	1.0	0.0	0.0	0.0	1.0	0.0	0.0
KIF23	9493	symbol	H. sapiens	9493	H. sapiens	1.0	1.0	0.0	1.0	0.0	0.0	0.0	0.0	1.0	0.0	0.0	0.0	0.0	0.0	0.0	0.0	0.0	0.0	0.0	0.0
IDH3A	3419	symbol	H. sapiens	3419	H. sapiens	0.0	0.0	1.0	0.0	0.0	0.0	0.0	0.0	0.0	0.0	0.0	0.0	0.0	0.0	0.0	0.0	1.0	0.0	0.0	0.0
SPNS1	83985	symbol	H. sapiens	83985	H. sapiens	0.0	0.0	0.0	0.0	0.0	0.0	0.0	0.0	0.0	0.0	0.0	0.0	0.0	0.0	0.0	0.0	0.0	0.0	0.0	0.0
SYT17	51760	symbol	H. sapiens	51760	H. sapiens	0.0	0.0	0.0	0.0	0.0	0.0	0.0	0.0	0.0	0.0	0.0	0.0	0.0	0.0	0.0	0.0	0.0	1.0	0.0	0.0
AC009137.1						nan	nan	nan	nan	nan	nan	nan	nan	nan	nan	nan	nan	nan	nan	nan	nan	nan	nan	nan	nan
SNHG19	100507303	symbol	H. sapiens	100507303	H. sapiens	0.0	0.0	0.0	0.0	0.0	0.0	0.0	0.0	0.0	0.0	0.0	0.0	0.0	0.0	0.0	0.0	0.0	0.0	0.0	0.0
ARL2BP	23568	symbol	H. sapiens	23568	H. sapiens	0.0	0.0	0.0	0.0	0.0	0.0	0.0	0.0	0.0	0.0	0.0	0.0	0.0	0.0	0.0	0.0	0.0	0.0	0.0	0.0
CBFA2T3	863	symbol	H. sapiens	863	H. sapiens	0.0	0.0	1.0	0.0	0.0	0.0	0.0	0.0	0.0	0.0	1.0	1.0	0.0	0.0	0.0	0.0	1.0	0.0	0.0	0.0
HERPUD1	9709	symbol	H. sapiens	9709	H. sapiens	0.0	0.0	0.0	0.0	1.0	0.0	0.0	0.0	0.0	0.0	0.0	1.0	0.0	0.0	0.0	0.0	0.0	0.0	0.0	0.0
WWOX	51741	symbol	H. sapiens	51741	H. sapiens	0.0	0.0	0.0	0.0	0.0	0.0	0.0	1.0	0.0	0.0	0.0	0.0	0.0	1.0	0.0	1.0	0.0	0.0	0.0	0.0
LMF1	64788	symbol	H. sapiens	64788	H. sapiens	0.0	0.0	1.0	0.0	0.0	0.0	0.0	0.0	0.0	0.0	0.0	0.0	0.0	0.0	0.0	0.0	0.0	0.0	0.0	0.0
COMMD4	54939	symbol	H. sapiens	54939	H. sapiens	0.0	0.0	0.0	0.0	0.0	0.0	0.0	0.0	0.0	0.0	0.0	0.0	0.0	0.0	0.0	0.0	0.0	0.0	0.0	0.0
PTPN9	5780	symbol	H. sapiens	5780	H. sapiens	1.0	0.0	0.0	0.0	0.0	0.0	0.0	0.0	0.0	0.0	1.0	0.0	0.0	0.0	0.0	0.0	0.0	0.0	0.0	0.0
APRT	353	symbol	H. sapiens	353	H. sapiens	0.0	0.0	1.0	0.0	0.0	0.0	0.0	0.0	0.0	0.0	0.0	0.0	0.0	0.0	0.0	0.0	0.0	0.0	0.0	1.0
WDR59	79726	symbol	H. sapiens	79726	H. sapiens	0.0	0.0	0.0	0.0	0.0	0.0	0.0	0.0	0.0	0.0	0.0	0.0	0.0	0.0	0.0	0.0	0.0	0.0	0.0	0.0
ACSF2	80221	symbol	H. sapiens	80221	H. sapiens	0.0	0.0	1.0	0.0	0.0	0.0	0.0	0.0	0.0	0.0	0.0	0.0	0.0	0.0	0.0	0.0	0.0	0.0	0.0	0.0
PCYT2	5833	symbol	H. sapiens	5833	H. sapiens	0.0	0.0	1.0	0.0	0.0	0.0	0.0	0.0	0.0	0.0	0.0	0.0	0.0	0.0	0.0	0.0	0.0	0.0	0.0	0.0
METTL22	79091	symbol	H. sapiens	79091	H. sapiens	0.0	0.0	0.0	0.0	0.0	0.0	0.0	0.0	0.0	0.0	0.0	0.0	1.0	0.0	0.0	0.0	0.0	0.0	0.0	0.0
NUP88	4927	symbol	H. sapiens	4927	H. sapiens	0.0	0.0	1.0	0.0	1.0	0.0	0.0	0.0	0.0	0.0	1.0	0.0	1.0	0.0	0.0	0.0	1.0	0.0	0.0	0.0
HCFC1R1	54985	symbol	H. sapiens	54985	H. sapiens	0.0	0.0	0.0	0.0	0.0	0.0	0.0	0.0	0.0	0.0	0.0	0.0	0.0	0.0	0.0	0.0	0.0	0.0	0.0	0.0
B9D1	27077	symbol	H. sapiens	27077	H. sapiens	0.0	0.0	0.0	0.0	0.0	0.0	0.0	1.0	0.0	0.0	0.0	0.0	0.0	0.0	0.0	0.0	0.0	0.0	0.0	0.0
TOM1L1	10040	symbol	H. sapiens	10040	H. sapiens	1.0	1.0	0.0	0.0	1.0	0.0	0.0	0.0	0.0	0.0	0.0	1.0	0.0	0.0	0.0	1.0	0.0	0.0	0.0	0.0
URI1	8725	symbol	H. sapiens	8725	H. sapiens	0.0	0.0	0.0	0.0	0.0	0.0	0.0	0.0	0.0	0.0	0.0	0.0	0.0	0.0	0.0	0.0	0.0	0.0	0.0	0.0
NT5C	30833	symbol	H. sapiens	30833	H. sapiens	0.0	0.0	1.0	0.0	0.0	0.0	0.0	0.0	0.0	0.0	1.0	0.0	0.0	0.0	0.0	0.0	0.0	0.0	0.0	0.0
FLII	2314	symbol	H. sapiens	2314	H. sapiens	0.0	0.0	0.0	0.0	0.0	0.0	0.0	0.0	0.0	0.0	0.0	0.0	0.0	0.0	0.0	0.0	0.0	0.0	0.0	0.0
SNHG15	285958	symbol	H. sapiens	285958	H. sapiens	0.0	0.0	0.0	0.0	0.0	0.0	0.0	0.0	0.0	0.0	0.0	0.0	0.0	0.0	0.0	0.0	0.0	0.0	0.0	0.0
SPAG5	10615	symbol	H. sapiens	10615	H. sapiens	1.0	1.0	0.0	1.0	0.0	0.0	1.0	0.0	1.0	0.0	0.0	0.0	0.0	0.0	0.0	0.0	0.0	0.0	0.0	0.0
YPEL2	388403	symbol	H. sapiens	388403	H. sapiens	0.0	0.0	0.0	0.0	0.0	0.0	0.0	0.0	0.0	0.0	0.0	0.0	0.0	0.0	0.0	0.0	0.0	0.0	0.0	0.0
TYMS	7298	symbol	H. sapiens	7298	H. sapiens	0.0	1.0	1.0	0.0	0.0	1.0	0.0	0.0	0.0	0.0	0.0	0.0	1.0	0.0	0.0	1.0	0.0	0.0	0.0	1.0
SLC16A6	9120	symbol	H. sapiens	9120	H. sapiens	0.0	0.0	0.0	0.0	0.0	0.0	0.0	0.0	0.0	0.0	0.0	0.0	0.0	0.0	0.0	0.0	0.0	0.0	0.0	0.0
DDX42	11325	symbol	H. sapiens	11325	H. sapiens	0.0	0.0	0.0	0.0	0.0	0.0	0.0	0.0	0.0	0.0	0.0	0.0	0.0	0.0	0.0	0.0	0.0	0.0	0.0	0.0
CDK5RAP3	80279	symbol	H. sapiens	80279	H. sapiens	0.0	1.0	0.0	0.0	0.0	0.0	0.0	0.0	0.0	0.0	0.0	1.0	0.0	0.0	0.0	1.0	0.0	0.0	0.0	0.0
MXRA7	439921	symbol	H. sapiens	439921	H. sapiens	0.0	0.0	0.0	0.0	0.0	0.0	0.0	0.0	0.0	0.0	0.0	0.0	0.0	0.0	0.0	0.0	0.0	0.0	0.0	0.0
PODNL1	79883	symbol	H. sapiens	79883	H. sapiens	0.0	0.0	0.0	0.0	0.0	0.0	0.0	0.0	0.0	0.0	0.0	0.0	0.0	0.0	0.0	0.0	0.0	0.0	0.0	0.0
HOOK2	29911	symbol	H. sapiens	29911	H. sapiens	0.0	0.0	0.0	0.0	0.0	0.0	1.0	0.0	1.0	0.0	0.0	0.0	0.0	0.0	0.0	0.0	0.0	0.0	0.0	0.0
UNK	85451	symbol	H. sapiens	85451	H. sapiens	0.0	0.0	0.0	0.0	0.0	1.0	0.0	1.0	0.0	0.0	0.0	0.0	0.0	0.0	0.0	0.0	0.0	1.0	0.0	0.0
KRT13	3860	symbol	H. sapiens	3860	H. sapiens	0.0	0.0	0.0	0.0	0.0	0.0	0.0	0.0	0.0	0.0	0.0	0.0	0.0	0.0	0.0	0.0	0.0	0.0	0.0	0.0
DNAJC7	7266	symbol	H. sapiens	7266	H. sapiens	0.0	0.0	1.0	0.0	1.0	0.0	0.0	0.0	0.0	0.0	0.0	0.0	0.0	0.0	0.0	0.0	0.0	0.0	0.0	0.0
HDHD2	84064	symbol	H. sapiens	84064	H. sapiens	0.0	0.0	0.0	0.0	0.0	0.0	0.0	0.0	0.0	0.0	0.0	0.0	0.0	0.0	0.0	0.0	0.0	0.0	0.0	0.0
GALNT1	2589	symbol	H. sapiens	2589	H. sapiens	0.0	0.0	1.0	0.0	0.0	0.0	0.0	0.0	0.0	0.0	0.0	0.0	0.0	0.0	0.0	1.0	0.0	0.0	0.0	0.0
ATP5F1A	498	symbol	H. sapiens	498	H. sapiens	0.0	0.0	1.0	0.0	0.0	0.0	0.0	0.0	0.0	0.0	0.0	0.0	0.0	1.0	0.0	0.0	1.0	0.0	0.0	0.0
ADGRE5	976	symbol	H. sapiens	976	H. sapiens	0.0	0.0	0.0	0.0	0.0	0.0	0.0	0.0	0.0	0.0	0.0	0.0	0.0	0.0	0.0	0.0	0.0	0.0	0.0	0.0
SEPTIN9	10801	symbol	H. sapiens	10801	H. sapiens	0.0	0.0	0.0	1.0	0.0	0.0	1.0	0.0	0.0	0.0	0.0	0.0	0.0	0.0	0.0	0.0	0.0	0.0	0.0	0.0
DDX39A	10212	symbol	H. sapiens	10212	H. sapiens	0.0	0.0	1.0	0.0	0.0	0.0	0.0	0.0	0.0	0.0	0.0	0.0	0.0	0.0	0.0	0.0	0.0	0.0	0.0	0.0
AD000671.1						nan	nan	nan	nan	nan	nan	nan	nan	nan	nan	nan	nan	nan	nan	nan	nan	nan	nan	nan	nan
ACBD4	79777	symbol	H. sapiens	79777	H. sapiens	0.0	0.0	0.0	0.0	0.0	0.0	0.0	0.0	0.0	0.0	0.0	0.0	0.0	0.0	0.0	0.0	0.0	0.0	0.0	0.0
RHBDF2	79651	symbol	H. sapiens	79651	H. sapiens	0.0	0.0	0.0	0.0	0.0	0.0	0.0	0.0	0.0	0.0	0.0	0.0	0.0	0.0	0.0	0.0	0.0	0.0	0.0	0.0
TLE2	7089	symbol	H. sapiens	7089	H. sapiens	0.0	0.0	0.0	0.0	0.0	0.0	0.0	0.0	0.0	0.0	0.0	0.0	0.0	0.0	0.0	0.0	0.0	0.0	0.0	0.0
TMEM161A	54929	symbol	H. sapiens	54929	H. sapiens	0.0	0.0	0.0	0.0	1.0	0.0	0.0	0.0	0.0	0.0	0.0	0.0	0.0	0.0	0.0	0.0	0.0	0.0	0.0	0.0
ZNF766	90321	symbol	H. sapiens	90321	H. sapiens	0.0	0.0	0.0	0.0	0.0	0.0	0.0	0.0	0.0	0.0	0.0	0.0	0.0	0.0	0.0	0.0	0.0	0.0	0.0	0.0
GNAS-AS1	149775	symbol	H. sapiens	149775	H. sapiens	0.0	0.0	0.0	0.0	0.0	0.0	0.0	0.0	0.0	0.0	0.0	0.0	0.0	0.0	0.0	0.0	0.0	0.0	0.0	0.0
UBA52	7311	symbol	H. sapiens	7311	H. sapiens	0.0	0.0	1.0	0.0	1.0	1.0	0.0	0.0	0.0	0.0	1.0	1.0	0.0	1.0	0.0	0.0	0.0	0.0	0.0	0.0
PPP1R26	9858	symbol	H. sapiens	9858	H. sapiens	0.0	0.0	0.0	0.0	0.0	0.0	0.0	0.0	0.0	0.0	0.0	0.0	0.0	0.0	0.0	0.0	0.0	0.0	0.0	0.0
AC133644.2						nan	nan	nan	nan	nan	nan	nan	nan	nan	nan	nan	nan	nan	nan	nan	nan	nan	nan	nan	nan
LTBP4	8425	symbol	H. sapiens	8425	H. sapiens	0.0	0.0	0.0	0.0	0.0	0.0	0.0	0.0	0.0	0.0	0.0	0.0	0.0	1.0	0.0	0.0	0.0	0.0	0.0	0.0
SRSF3	6428	symbol	H. sapiens	6428	H. sapiens	0.0	0.0	1.0	0.0	0.0	0.0	0.0	0.0	0.0	0.0	0.0	0.0	0.0	0.0	0.0	0.0	0.0	0.0	0.0	0.0
PARG	8505	symbol	H. sapiens	8505	H. sapiens	0.0	0.0	1.0	0.0	1.0	0.0	0.0	0.0	0.0	0.0	0.0	0.0	0.0	0.0	0.0	0.0	0.0	0.0	0.0	0.0
JRK	8629	symbol	H. sapiens	8629	H. sapiens	0.0	0.0	0.0	0.0	0.0	0.0	0.0	0.0	0.0	0.0	0.0	0.0	0.0	0.0	0.0	0.0	0.0	0.0	0.0	0.0
PMPCA	23203	symbol	H. sapiens	23203	H. sapiens	0.0	0.0	0.0	0.0	0.0	0.0	0.0	0.0	0.0	0.0	1.0	0.0	0.0	0.0	0.0	0.0	0.0	0.0	0.0	0.0
CAB39	51719	symbol	H. sapiens	51719	H. sapiens	0.0	1.0	0.0	0.0	0.0	0.0	0.0	0.0	0.0	0.0	0.0	0.0	0.0	0.0	0.0	1.0	0.0	0.0	0.0	0.0
PLCB1	23236	symbol	H. sapiens	23236	H. sapiens	1.0	1.0	1.0	0.0	1.0	0.0	1.0	0.0	0.0	1.0	0.0	0.0	0.0	0.0	0.0	0.0	0.0	0.0	0.0	0.0
MAN2C1	4123	symbol	H. sapiens	4123	H. sapiens	0.0	0.0	1.0	0.0	0.0	0.0	0.0	0.0	0.0	0.0	0.0	0.0	0.0	0.0	0.0	0.0	0.0	0.0	0.0	0.0
RGS3	5998	symbol	H. sapiens	5998	H. sapiens	0.0	0.0	0.0	0.0	0.0	0.0	0.0	0.0	0.0	0.0	0.0	0.0	0.0	0.0	0.0	0.0	0.0	0.0	0.0	0.0
SLC30A5	64924	symbol	H. sapiens	64924	H. sapiens	0.0	0.0	0.0	0.0	0.0	0.0	0.0	0.0	0.0	0.0	0.0	0.0	0.0	0.0	0.0	0.0	0.0	0.0	0.0	0.0
ELOVL1	64834	symbol	H. sapiens	64834	H. sapiens	0.0	0.0	1.0	0.0	0.0	0.0	0.0	0.0	0.0	0.0	0.0	0.0	0.0	0.0	0.0	0.0	0.0	0.0	0.0	0.0
ST6GALNAC6	30815	symbol	H. sapiens	30815	H. sapiens	0.0	0.0	1.0	0.0	0.0	0.0	0.0	0.0	0.0	0.0	0.0	0.0	0.0	0.0	0.0	0.0	0.0	0.0	0.0	0.0
OXSM	54995	symbol	H. sapiens	54995	H. sapiens	0.0	0.0	1.0	0.0	0.0	0.0	0.0	0.0	0.0	0.0	0.0	0.0	0.0	0.0	0.0	0.0	0.0	0.0	0.0	0.0
ZMYND11	10771	symbol	H. sapiens	10771	H. sapiens	0.0	0.0	0.0	0.0	1.0	0.0	0.0	0.0	0.0	0.0	0.0	0.0	0.0	0.0	0.0	0.0	0.0	0.0	0.0	0.0
BISPR	105221694	symbol	H. sapiens	105221694	H. sapiens	0.0	0.0	0.0	0.0	0.0	0.0	0.0	0.0	0.0	0.0	0.0	0.0	0.0	0.0	0.0	0.0	0.0	0.0	0.0	0.0
SERPINA1	5265	symbol	H. sapiens	5265	H. sapiens	0.0	0.0	0.0	0.0	0.0	0.0	0.0	0.0	0.0	0.0	0.0	0.0	0.0	0.0	0.0	0.0	0.0	0.0	0.0	0.0
PIGN	23556	symbol	H. sapiens	23556	H. sapiens	0.0	0.0	1.0	0.0	0.0	0.0	0.0	0.0	0.0	0.0	0.0	0.0	0.0	0.0	0.0	0.0	0.0	0.0	0.0	0.0
PHGDH	26227	symbol	H. sapiens	26227	H. sapiens	0.0	0.0	0.0	0.0	0.0	0.0	0.0	1.0	0.0	0.0	0.0	0.0	0.0	0.0	0.0	0.0	1.0	0.0	1.0	0.0

## Sheet: Enrichment_down_isoforms
GroupID	Category	Term	Description	LogP	Log(q-value)	InTerm_InList	Genes	Symbols
1_Summary	GO Biological Processes	GO:0000280	nuclear division	-6.80327	-2.8659	23/411	332,472,655,4085,5889,6152,6790,7153,8086,9493,9787,10040,10201,10388,10615,10783,11004,23236,25788,25906,51203,91782,348654,2669,9400,55839,64210,2263,10018,10733,23326,79366,219771,3720,329,1785,3146,5747,5780,7057,9270,10509,29993	BIRC5,ATM,BMP7,MAD2L1,RAD51C,RPL24,AURKA,TOP2A,AAAS,KIF23,DLGAP5,TOM1L1,NME6,SYCP2,SPAG5,NEK6,KIF2C,PLCB1,RAD54B,ANAPC15,NUSAP1,CHMP7,GEN1,GEM,RECQL5,CENPN,MMS19,FGFR2,BCL2L11,PLK4,USP22,HMGN5,CCNY,JARID2,BIRC2,DNM2,HMGB1,PTK2,PTPN9,THBS1,ITGB1BP1,SEMA4B,PACSIN1
1_Member	GO Biological Processes	GO:0000280	nuclear division	-6.80327	-2.8659	23/411	332,472,655,4085,5889,6152,6790,7153,8086,9493,9787,10040,10201,10388,10615,10783,11004,23236,25788,25906,51203,91782,348654	BIRC5,ATM,BMP7,MAD2L1,RAD51C,RPL24,AURKA,TOP2A,AAAS,KIF23,DLGAP5,TOM1L1,NME6,SYCP2,SPAG5,NEK6,KIF2C,PLCB1,RAD54B,ANAPC15,NUSAP1,CHMP7,GEN1
1_Member	GO Biological Processes	GO:0140014	mitotic nuclear division	-6.58935	-2.8659	18/268	332,472,655,4085,6152,6790,8086,9493,9787,10040,10201,10615,10783,11004,25906,51203,91782,348654	BIRC5,ATM,BMP7,MAD2L1,RPL24,AURKA,AAAS,KIF23,DLGAP5,TOM1L1,NME6,SPAG5,NEK6,KIF2C,ANAPC15,NUSAP1,CHMP7,GEN1
1_Member	GO Biological Processes	GO:0048285	organelle fission	-6.06472	-2.68501	23/453	332,472,655,4085,5889,6152,6790,7153,8086,9493,9787,10040,10201,10388,10615,10783,11004,23236,25788,25906,51203,91782,348654	BIRC5,ATM,BMP7,MAD2L1,RAD51C,RPL24,AURKA,TOP2A,AAAS,KIF23,DLGAP5,TOM1L1,NME6,SYCP2,SPAG5,NEK6,KIF2C,PLCB1,RAD54B,ANAPC15,NUSAP1,CHMP7,GEN1
1_Member	GO Biological Processes	GO:0007059	chromosome segregation	-6.02145	-2.68501	19/324	332,472,2669,4085,5889,7153,9400,9493,9787,10388,10615,10783,11004,25906,51203,55839,64210,91782,348654	BIRC5,ATM,GEM,MAD2L1,RAD51C,TOP2A,RECQL5,KIF23,DLGAP5,SYCP2,SPAG5,NEK6,KIF2C,ANAPC15,NUSAP1,CENPN,MMS19,CHMP7,GEN1
1_Member	GO Biological Processes	GO:0000819	sister chromatid segregation	-4.95973	-2.17413	13/192	472,4085,5889,7153,9493,9787,10615,10783,11004,25906,51203,91782,348654	ATM,MAD2L1,RAD51C,TOP2A,KIF23,DLGAP5,SPAG5,NEK6,KIF2C,ANAPC15,NUSAP1,CHMP7,GEN1
1_Member	GO Biological Processes	GO:0045839	negative regulation of mitotic nuclear division	-4.8069	-2.11717	7/52	472,655,4085,10040,10201,25906,348654	ATM,BMP7,MAD2L1,TOM1L1,NME6,ANAPC15,GEN1
1_Member	GO Biological Processes	GO:0098813	nuclear chromosome segregation	-4.69603	-2.07523	15/265	472,2669,4085,5889,7153,9493,9787,10388,10615,10783,11004,25906,51203,91782,348654	ATM,GEM,MAD2L1,RAD51C,TOP2A,KIF23,DLGAP5,SYCP2,SPAG5,NEK6,KIF2C,ANAPC15,NUSAP1,CHMP7,GEN1
1_Member	GO Biological Processes	GO:0000070	mitotic sister chromatid segregation	-4.49813	-1.96031	11/154	472,4085,9493,9787,10615,10783,11004,25906,51203,91782,348654	ATM,MAD2L1,KIF23,DLGAP5,SPAG5,NEK6,KIF2C,ANAPC15,NUSAP1,CHMP7,GEN1
1_Member	GO Biological Processes	GO:0051784	negative regulation of nuclear division	-4.39294	-1.90837	7/60	472,655,4085,10040,10201,25906,348654	ATM,BMP7,MAD2L1,TOM1L1,NME6,ANAPC15,GEN1
1_Member	GO Biological Processes	GO:0051783	regulation of nuclear division	-4.32586	-1.87288	12/190	472,655,4085,6790,9787,10040,10201,10783,23236,25906,51203,348654	ATM,BMP7,MAD2L1,AURKA,DLGAP5,TOM1L1,NME6,NEK6,PLCB1,ANAPC15,NUSAP1,GEN1
1_Member	GO Biological Processes	GO:0007088	regulation of mitotic nuclear division	-4.20003	-1.76288	11/166	472,655,4085,6790,9787,10040,10201,10783,25906,51203,348654	ATM,BMP7,MAD2L1,AURKA,DLGAP5,TOM1L1,NME6,NEK6,ANAPC15,NUSAP1,GEN1
1_Member	GO Biological Processes	GO:0051304	chromosome separation	-4.08005	-1.67881	8/90	472,4085,7153,9400,9787,10783,25906,348654	ATM,MAD2L1,TOP2A,RECQL5,DLGAP5,NEK6,ANAPC15,GEN1
1_Member	GO Biological Processes	GO:0030071	regulation of mitotic metaphase/anaphase transition	-3.8592	-1.52194	6/51	472,4085,9787,10783,25906,348654	ATM,MAD2L1,DLGAP5,NEK6,ANAPC15,GEN1
1_Member	GO Biological Processes	GO:1902099	regulation of metaphase/anaphase transition of cell cycle	-3.76515	-1.46615	6/53	472,4085,9787,10783,25906,348654	ATM,MAD2L1,DLGAP5,NEK6,ANAPC15,GEN1
1_Member	GO Biological Processes	GO:0007091	metaphase/anaphase transition of mitotic cell cycle	-3.71969	-1.43292	6/54	472,4085,9787,10783,25906,348654	ATM,MAD2L1,DLGAP5,NEK6,ANAPC15,GEN1
1_Member	GO Biological Processes	GO:0051983	regulation of chromosome segregation	-3.66946	-1.39406	8/103	472,4085,9787,10615,10783,11004,25906,348654	ATM,MAD2L1,DLGAP5,SPAG5,NEK6,KIF2C,ANAPC15,GEN1
1_Member	GO Biological Processes	GO:0044784	metaphase/anaphase transition of cell cycle	-3.63167	-1.38048	6/56	472,4085,9787,10783,25906,348654	ATM,MAD2L1,DLGAP5,NEK6,ANAPC15,GEN1
1_Member	GO Biological Processes	GO:0010965	regulation of mitotic sister chromatid separation	-3.58905	-1.3511	6/57	472,4085,9787,10783,25906,348654	ATM,MAD2L1,DLGAP5,NEK6,ANAPC15,GEN1
1_Member	GO Biological Processes	GO:0051306	mitotic sister chromatid separation	-3.46632	-1.27828	6/60	472,4085,9787,10783,25906,348654	ATM,MAD2L1,DLGAP5,NEK6,ANAPC15,GEN1
1_Member	GO Biological Processes	GO:1905818	regulation of chromosome separation	-3.3885	-1.21731	6/62	472,4085,9787,10783,25906,348654	ATM,MAD2L1,DLGAP5,NEK6,ANAPC15,GEN1
1_Member	GO Biological Processes	GO:0045787	positive regulation of cell cycle	-3.34857	-1.18939	16/389	472,2263,4085,5889,6790,9493,9787,10018,10615,10733,23236,23326,51203,79366,219771,348654	ATM,FGFR2,MAD2L1,RAD51C,AURKA,KIF23,DLGAP5,BCL2L11,SPAG5,PLK4,PLCB1,USP22,NUSAP1,HMGN5,CCNY,GEN1
1_Member	GO Biological Processes	GO:0033047	regulation of mitotic sister chromatid segregation	-3.17197	-1.07176	6/68	472,4085,9787,10783,25906,348654	ATM,MAD2L1,DLGAP5,NEK6,ANAPC15,GEN1
1_Member	GO Biological Processes	GO:0090231	regulation of spindle checkpoint	-2.9179	-0.91872	3/14	4085,25906,348654	MAD2L1,ANAPC15,GEN1
1_Member	GO Biological Processes	GO:0090266	regulation of mitotic cell cycle spindle assembly checkpoint	-2.9179	-0.91872	3/14	4085,25906,348654	MAD2L1,ANAPC15,GEN1
1_Member	GO Biological Processes	GO:1903504	regulation of mitotic spindle checkpoint	-2.9179	-0.91872	3/14	4085,25906,348654	MAD2L1,ANAPC15,GEN1
1_Member	GO Biological Processes	GO:0033045	regulation of sister chromatid segregation	-2.80118	-0.851022	6/80	472,4085,9787,10783,25906,348654	ATM,MAD2L1,DLGAP5,NEK6,ANAPC15,GEN1
1_Member	GO Biological Processes	GO:0007094	mitotic spindle assembly checkpoint	-2.72799	-0.819672	4/34	472,4085,25906,348654	ATM,MAD2L1,ANAPC15,GEN1
1_Member	GO Biological Processes	GO:0031577	spindle checkpoint	-2.72799	-0.819672	4/34	472,4085,25906,348654	ATM,MAD2L1,ANAPC15,GEN1
1_Member	GO Biological Processes	GO:0071173	spindle assembly checkpoint	-2.72799	-0.819672	4/34	472,4085,25906,348654	ATM,MAD2L1,ANAPC15,GEN1
1_Member	GO Biological Processes	GO:0071174	mitotic spindle checkpoint	-2.72799	-0.819672	4/34	472,4085,25906,348654	ATM,MAD2L1,ANAPC15,GEN1
1_Member	GO Biological Processes	GO:0045841	negative regulation of mitotic metaphase/anaphase transition	-2.63476	-0.753556	4/36	472,4085,25906,348654	ATM,MAD2L1,ANAPC15,GEN1
1_Member	GO Biological Processes	GO:1902100	negative regulation of metaphase/anaphase transition of cell cycle	-2.59039	-0.735934	4/37	472,4085,25906,348654	ATM,MAD2L1,ANAPC15,GEN1
1_Member	GO Biological Processes	GO:2000816	negative regulation of mitotic sister chromatid separation	-2.5057	-0.68352	4/39	472,4085,25906,348654	ATM,MAD2L1,ANAPC15,GEN1
1_Member	GO Biological Processes	GO:1905819	negative regulation of chromosome separation	-2.46524	-0.650943	4/40	472,4085,25906,348654	ATM,MAD2L1,ANAPC15,GEN1
1_Member	GO Biological Processes	GO:0033048	negative regulation of mitotic sister chromatid segregation	-2.38779	-0.600513	4/42	472,4085,25906,348654	ATM,MAD2L1,ANAPC15,GEN1
1_Member	GO Biological Processes	GO:0045931	positive regulation of mitotic cell cycle	-2.37846	-0.594898	8/163	4085,5889,6790,9787,23236,23326,51203,348654	MAD2L1,RAD51C,AURKA,DLGAP5,PLCB1,USP22,NUSAP1,GEN1
1_Member	GO Biological Processes	GO:0033046	negative regulation of sister chromatid segregation	-2.31458	-0.559604	4/44	472,4085,25906,348654	ATM,MAD2L1,ANAPC15,GEN1
1_Member	GO Biological Processes	GO:0051985	negative regulation of chromosome segregation	-2.27944	-0.541261	4/45	472,4085,25906,348654	ATM,MAD2L1,ANAPC15,GEN1
1_Member	GO Biological Processes	GO:0090068	positive regulation of cell cycle process	-2.12551	-0.447303	11/298	472,4085,5889,6790,9493,9787,10615,10733,23236,51203,348654	ATM,MAD2L1,RAD51C,AURKA,KIF23,DLGAP5,SPAG5,PLK4,PLCB1,NUSAP1,GEN1
1_Member	GO Biological Processes	GO:1901976	regulation of cell cycle checkpoint	-1.87346	-0.293018	3/32	4085,25906,348654	MAD2L1,ANAPC15,GEN1
1_Member	GO Biological Processes	GO:2001251	negative regulation of chromosome organization	-1.56374	-0.0824978	6/146	472,3720,4085,7153,25906,348654	ATM,JARID2,MAD2L1,TOP2A,ANAPC15,GEN1
1_Member	GO Biological Processes	GO:0051129	negative regulation of cellular component organization	-1.33975	0	18/745	329,472,655,1785,3146,3720,4085,5747,5780,7057,7153,9270,10040,10201,10509,25906,29993,348654	BIRC2,ATM,BMP7,DNM2,HMGB1,JARID2,MAD2L1,PTK2,PTPN9,THBS1,TOP2A,ITGB1BP1,TOM1L1,NME6,SEMA4B,ANAPC15,PACSIN1,GEN1
2_Summary	GO Biological Processes	GO:0044772	mitotic cell cycle phase transition	-6.69087	-2.8659	28/588	472,596,1785,4085,4176,5422,5557,5695,5710,5889,6152,6790,7298,9702,9787,10733,10783,10806,23236,25906,25949,29980,51149,63967,80279,91782,219771,348654,655,4088,5796,7057,7153,9238,10040,10201,10669,11335,51719,55004,55771,79366,23326,51203,6047,9493,10615,27044	ATM,BCL2,DNM2,MAD2L1,MCM7,POLA1,PRIM1,PSMB7,PSMD4,RAD51C,RPL24,AURKA,TYMS,CEP57,DLGAP5,PLK4,NEK6,SDCCAG8,PLCB1,ANAPC15,SYF2,DONSON,MRNIP,CLSPN,CDK5RAP3,CHMP7,CCNY,GEN1,BMP7,SMAD3,PTPRK,THBS1,TOP2A,TBRG4,TOM1L1,NME6,CGREF1,CBX3,CAB39,LAMTOR1,PRR11,HMGN5,USP22,NUSAP1,RNF4,KIF23,SPAG5,SND1
2_Member	GO Biological Processes	GO:0044772	mitotic cell cycle phase transition	-6.69087	-2.8659	28/588	472,596,1785,4085,4176,5422,5557,5695,5710,5889,6152,6790,7298,9702,9787,10733,10783,10806,23236,25906,25949,29980,51149,63967,80279,91782,219771,348654	ATM,BCL2,DNM2,MAD2L1,MCM7,POLA1,PRIM1,PSMB7,PSMD4,RAD51C,RPL24,AURKA,TYMS,CEP57,DLGAP5,PLK4,NEK6,SDCCAG8,PLCB1,ANAPC15,SYF2,DONSON,MRNIP,CLSPN,CDK5RAP3,CHMP7,CCNY,GEN1
2_Member	GO Biological Processes	GO:0007095	mitotic G2 DNA damage checkpoint	-6.34917	-2.75066	6/20	472,25949,29980,51149,63967,80279	ATM,SYF2,DONSON,MRNIP,CLSPN,CDK5RAP3
2_Member	GO Biological Processes	GO:0044770	cell cycle phase transition	-6.07823	-2.68501	28/631	472,596,1785,4085,4176,5422,5557,5695,5710,5889,6152,6790,7298,9702,9787,10733,10783,10806,23236,25906,25949,29980,51149,63967,80279,91782,219771,348654	ATM,BCL2,DNM2,MAD2L1,MCM7,POLA1,PRIM1,PSMB7,PSMD4,RAD51C,RPL24,AURKA,TYMS,CEP57,DLGAP5,PLK4,NEK6,SDCCAG8,PLCB1,ANAPC15,SYF2,DONSON,MRNIP,CLSPN,CDK5RAP3,CHMP7,CCNY,GEN1
2_Member	GO Biological Processes	GO:0045786	negative regulation of cell cycle	-5.93134	-2.68501	28/642	472,596,655,4085,4088,5695,5710,5796,6152,6790,7057,7153,9238,10040,10201,10669,11335,25906,25949,29980,51149,51719,55004,55771,63967,79366,80279,348654	ATM,BCL2,BMP7,MAD2L1,SMAD3,PSMB7,PSMD4,PTPRK,RPL24,AURKA,THBS1,TOP2A,TBRG4,TOM1L1,NME6,CGREF1,CBX3,ANAPC15,SYF2,DONSON,MRNIP,CAB39,LAMTOR1,PRR11,CLSPN,HMGN5,CDK5RAP3,GEN1
2_Member	GO Biological Processes	GO:0045930	negative regulation of mitotic cell cycle	-5.74865	-2.59971	19/338	472,596,655,4085,4088,5695,5710,6152,6790,7153,10040,10201,25906,25949,29980,51149,63967,80279,348654	ATM,BCL2,BMP7,MAD2L1,SMAD3,PSMB7,PSMD4,RPL24,AURKA,TOP2A,TOM1L1,NME6,ANAPC15,SYF2,DONSON,MRNIP,CLSPN,CDK5RAP3,GEN1
2_Member	GO Biological Processes	GO:0000086	G2/M transition of mitotic cell cycle	-5.71695	-2.59971	16/247	472,1785,5695,5710,5889,6790,9702,10733,10806,23236,25949,29980,51149,63967,80279,219771	ATM,DNM2,PSMB7,PSMD4,RAD51C,AURKA,CEP57,PLK4,SDCCAG8,PLCB1,SYF2,DONSON,MRNIP,CLSPN,CDK5RAP3,CCNY
2_Member	GO Biological Processes	GO:0007346	regulation of mitotic cell cycle	-5.68635	-2.59971	28/661	472,596,655,4085,4088,5695,5710,5889,6152,6790,7153,9702,9787,10040,10201,10733,10783,10806,23236,23326,25906,25949,29980,51149,51203,63967,80279,348654	ATM,BCL2,BMP7,MAD2L1,SMAD3,PSMB7,PSMD4,RAD51C,RPL24,AURKA,TOP2A,CEP57,DLGAP5,TOM1L1,NME6,PLK4,NEK6,SDCCAG8,PLCB1,USP22,ANAPC15,SYF2,DONSON,MRNIP,NUSAP1,CLSPN,CDK5RAP3,GEN1
2_Member	GO Biological Processes	GO:0044839	cell cycle G2/M phase transition	-5.30265	-2.33252	16/266	472,1785,5695,5710,5889,6790,9702,10733,10806,23236,25949,29980,51149,63967,80279,219771	ATM,DNM2,PSMB7,PSMD4,RAD51C,AURKA,CEP57,PLK4,SDCCAG8,PLCB1,SYF2,DONSON,MRNIP,CLSPN,CDK5RAP3,CCNY
2_Member	GO Biological Processes	GO:0044818	mitotic G2/M transition checkpoint	-5.22124	-2.28567	6/30	472,25949,29980,51149,63967,80279	ATM,SYF2,DONSON,MRNIP,CLSPN,CDK5RAP3
2_Member	GO Biological Processes	GO:0031572	G2 DNA damage checkpoint	-5.13354	-2.26014	6/31	472,25949,29980,51149,63967,80279	ATM,SYF2,DONSON,MRNIP,CLSPN,CDK5RAP3
2_Member	GO Biological Processes	GO:0010564	regulation of cell cycle process	-5.11829	-2.26014	30/789	472,596,655,4085,5695,5710,5889,6047,6790,9493,9702,9787,10040,10201,10615,10733,10783,10806,11335,23236,25906,25949,27044,29980,51149,51203,63967,79366,80279,348654	ATM,BCL2,BMP7,MAD2L1,PSMB7,PSMD4,RAD51C,RNF4,AURKA,KIF23,CEP57,DLGAP5,TOM1L1,NME6,SPAG5,PLK4,NEK6,SDCCAG8,CBX3,PLCB1,ANAPC15,SYF2,SND1,DONSON,MRNIP,NUSAP1,CLSPN,HMGN5,CDK5RAP3,GEN1
2_Member	GO Biological Processes	GO:0007093	mitotic cell cycle checkpoint	-4.93396	-2.16475	12/165	472,4085,6152,6790,7153,25906,25949,29980,51149,63967,80279,348654	ATM,MAD2L1,RPL24,AURKA,TOP2A,ANAPC15,SYF2,DONSON,MRNIP,CLSPN,CDK5RAP3,GEN1
2_Member	GO Biological Processes	GO:0010389	regulation of G2/M transition of mitotic cell cycle	-4.86384	-2.1248	13/196	472,5695,5710,5889,6790,9702,10733,10806,25949,29980,51149,63967,80279	ATM,PSMB7,PSMD4,RAD51C,AURKA,CEP57,PLK4,SDCCAG8,SYF2,DONSON,MRNIP,CLSPN,CDK5RAP3
2_Member	GO Biological Processes	GO:0010972	negative regulation of G2/M transition of mitotic cell cycle	-4.81953	-2.11717	9/93	472,5695,5710,6790,25949,29980,51149,63967,80279	ATM,PSMB7,PSMD4,AURKA,SYF2,DONSON,MRNIP,CLSPN,CDK5RAP3
2_Member	GO Biological Processes	GO:0010948	negative regulation of cell cycle process	-4.76556	-2.11717	18/361	472,596,655,4085,5695,5710,6790,10040,10201,11335,25906,25949,29980,51149,63967,79366,80279,348654	ATM,BCL2,BMP7,MAD2L1,PSMB7,PSMD4,AURKA,TOM1L1,NME6,CBX3,ANAPC15,SYF2,DONSON,MRNIP,CLSPN,HMGN5,CDK5RAP3,GEN1
2_Member	GO Biological Processes	GO:1901990	regulation of mitotic cell cycle phase transition	-4.59206	-2.01473	20/444	472,596,4085,5695,5710,5889,6790,9702,9787,10733,10783,10806,23236,25906,25949,29980,51149,63967,80279,348654	ATM,BCL2,MAD2L1,PSMB7,PSMD4,RAD51C,AURKA,CEP57,DLGAP5,PLK4,NEK6,SDCCAG8,PLCB1,ANAPC15,SYF2,DONSON,MRNIP,CLSPN,CDK5RAP3,GEN1
2_Member	GO Biological Processes	GO:1902749	regulation of cell cycle G2/M phase transition	-4.48297	-1.95449	13/213	472,5695,5710,5889,6790,9702,10733,10806,25949,29980,51149,63967,80279	ATM,PSMB7,PSMD4,RAD51C,AURKA,CEP57,PLK4,SDCCAG8,SYF2,DONSON,MRNIP,CLSPN,CDK5RAP3
2_Member	GO Biological Processes	GO:1902750	negative regulation of cell cycle G2/M phase transition	-4.39599	-1.90837	9/105	472,5695,5710,6790,25949,29980,51149,63967,80279	ATM,PSMB7,PSMD4,AURKA,SYF2,DONSON,MRNIP,CLSPN,CDK5RAP3
2_Member	GO Biological Processes	GO:1901987	regulation of cell cycle phase transition	-4.12181	-1.70656	20/480	472,596,4085,5695,5710,5889,6790,9702,9787,10733,10783,10806,23236,25906,25949,29980,51149,63967,80279,348654	ATM,BCL2,MAD2L1,PSMB7,PSMD4,RAD51C,AURKA,CEP57,DLGAP5,PLK4,NEK6,SDCCAG8,PLCB1,ANAPC15,SYF2,DONSON,MRNIP,CLSPN,CDK5RAP3,GEN1
2_Member	GO Biological Processes	GO:1901991	negative regulation of mitotic cell cycle phase transition	-3.81265	-1.49289	13/248	472,596,4085,5695,5710,6790,25906,25949,29980,51149,63967,80279,348654	ATM,BCL2,MAD2L1,PSMB7,PSMD4,AURKA,ANAPC15,SYF2,DONSON,MRNIP,CLSPN,CDK5RAP3,GEN1
2_Member	GO Biological Processes	GO:0000075	cell cycle checkpoint	-3.79533	-1.48685	12/216	472,4085,6152,6790,7153,25906,25949,29980,51149,63967,80279,348654	ATM,MAD2L1,RPL24,AURKA,TOP2A,ANAPC15,SYF2,DONSON,MRNIP,CLSPN,CDK5RAP3,GEN1
2_Member	GO Biological Processes	GO:0044774	mitotic DNA integrity checkpoint	-3.58375	-1.3511	8/106	472,6790,7153,25949,29980,51149,63967,80279	ATM,AURKA,TOP2A,SYF2,DONSON,MRNIP,CLSPN,CDK5RAP3
2_Member	GO Biological Processes	GO:1901988	negative regulation of cell cycle phase transition	-3.50064	-1.30438	13/267	472,596,4085,5695,5710,6790,25906,25949,29980,51149,63967,80279,348654	ATM,BCL2,MAD2L1,PSMB7,PSMD4,AURKA,ANAPC15,SYF2,DONSON,MRNIP,CLSPN,CDK5RAP3,GEN1
2_Member	GO Biological Processes	GO:0044773	mitotic DNA damage checkpoint	-3.08478	-1.03872	7/97	472,6790,25949,29980,51149,63967,80279	ATM,AURKA,SYF2,DONSON,MRNIP,CLSPN,CDK5RAP3
2_Member	GO Biological Processes	GO:0031570	DNA integrity checkpoint	-2.47699	-0.660231	8/157	472,6790,7153,25949,29980,51149,63967,80279	ATM,AURKA,TOP2A,SYF2,DONSON,MRNIP,CLSPN,CDK5RAP3
2_Member	GO Biological Processes	GO:0000077	DNA damage checkpoint	-2.10479	-0.430557	7/145	472,6790,25949,29980,51149,63967,80279	ATM,AURKA,SYF2,DONSON,MRNIP,CLSPN,CDK5RAP3
3_Summary	GO Biological Processes	GO:0009124	nucleoside monophosphate biosynthetic process	-5.97475	-2.68501	15/208	205,353,498,863,3615,3939,4927,4967,5209,6901,7298,7371,8086,10606,11097,10201,4705,4723,4728,8505,64834,4522,596,2589,5986,6382,8703,8706,23236,23556,30815,64788,64841,30833,54995,80221,472,5833,8566,8904,51447,332,1785,6428,8650,10212,27092,55308,57728,8836,7390,79094,6950,7311,7057,7266,79752,64210,171425,7263,4123,1390,3419,54414,57486,5935	AK4,APRT,ATP5F1A,CBFA2T3,IMPDH2,LDHA,NUP88,OGDH,PFKFB3,TAZ,TYMS,UCK2,AAAS,PAICS,NUP42,NME6,NDUFA10,NDUFV1,NDUFS8,PARG,ELOVL1,MTHFD1,BCL2,GALNT1,RFNG,SDC1,B4GALT3,B3GALNT1,PLCB1,PIGN,ST6GALNAC6,LMF1,GNPNAT1,NT5C,OXSM,ACSF2,ATM,PCYT2,PDXK,CPNE1,IP6K2,BIRC5,DNM2,SRSF3,NUMB,DDX39A,CACNG4,DDX19A,WDR19,GGH,UROS,CHAC1,TCP1,UBA52,THBS1,DNAJC7,ZFAND1,MMS19,CLYBL,TST,MAN2C1,CREM,IDH3A,SIAE,NLN,RBM3
3_Member	GO Biological Processes	GO:0009124	nucleoside monophosphate biosynthetic process	-5.97475	-2.68501	15/208	205,353,498,863,3615,3939,4927,4967,5209,6901,7298,7371,8086,10606,11097	AK4,APRT,ATP5F1A,CBFA2T3,IMPDH2,LDHA,NUP88,OGDH,PFKFB3,TAZ,TYMS,UCK2,AAAS,PAICS,NUP42
3_Member	GO Biological Processes	GO:0009142	nucleoside triphosphate biosynthetic process	-5.78051	-2.59971	14/188	205,498,863,3615,3939,4927,4967,5209,6901,7298,7371,8086,10201,11097	AK4,ATP5F1A,CBFA2T3,IMPDH2,LDHA,NUP88,OGDH,PFKFB3,TAZ,TYMS,UCK2,AAAS,NME6,NUP42
3_Member	GO Biological Processes	GO:0009156	ribonucleoside monophosphate biosynthetic process	-5.54101	-2.49707	14/197	205,353,498,863,3615,3939,4927,4967,5209,6901,7371,8086,10606,11097	AK4,APRT,ATP5F1A,CBFA2T3,IMPDH2,LDHA,NUP88,OGDH,PFKFB3,TAZ,UCK2,AAAS,PAICS,NUP42
3_Member	GO Biological Processes	GO:0009201	ribonucleoside triphosphate biosynthetic process	-5.34356	-2.3471	13/177	205,498,863,3615,3939,4927,4967,5209,6901,7371,8086,10201,11097	AK4,ATP5F1A,CBFA2T3,IMPDH2,LDHA,NUP88,OGDH,PFKFB3,TAZ,UCK2,AAAS,NME6,NUP42
3_Member	GO Biological Processes	GO:0009127	purine nucleoside monophosphate biosynthetic process	-5.18521	-2.28567	13/183	205,353,498,863,3615,3939,4927,4967,5209,6901,8086,10606,11097	AK4,APRT,ATP5F1A,CBFA2T3,IMPDH2,LDHA,NUP88,OGDH,PFKFB3,TAZ,AAAS,PAICS,NUP42
3_Member	GO Biological Processes	GO:0009168	purine ribonucleoside monophosphate biosynthetic process	-5.18521	-2.28567	13/183	205,353,498,863,3615,3939,4927,4967,5209,6901,8086,10606,11097	AK4,APRT,ATP5F1A,CBFA2T3,IMPDH2,LDHA,NUP88,OGDH,PFKFB3,TAZ,AAAS,PAICS,NUP42
3_Member	GO Biological Processes	GO:0009123	nucleoside monophosphate metabolic process	-5.08015	-2.24636	19/376	205,353,498,863,3615,3939,4705,4723,4728,4927,4967,5209,6901,7298,7371,8086,8505,10606,11097	AK4,APRT,ATP5F1A,CBFA2T3,IMPDH2,LDHA,NDUFA10,NDUFV1,NDUFS8,NUP88,OGDH,PFKFB3,TAZ,TYMS,UCK2,AAAS,PARG,PAICS,NUP42
3_Member	GO Biological Processes	GO:0009161	ribonucleoside monophosphate metabolic process	-4.86298	-2.1248	18/355	205,353,498,863,3615,3939,4705,4723,4728,4927,4967,5209,6901,7371,8086,8505,10606,11097	AK4,APRT,ATP5F1A,CBFA2T3,IMPDH2,LDHA,NDUFA10,NDUFV1,NDUFS8,NUP88,OGDH,PFKFB3,TAZ,UCK2,AAAS,PARG,PAICS,NUP42
3_Member	GO Biological Processes	GO:0009206	purine ribonucleoside triphosphate biosynthetic process	-4.7777	-2.11717	12/171	205,498,863,3615,3939,4927,4967,5209,6901,8086,10201,11097	AK4,ATP5F1A,CBFA2T3,IMPDH2,LDHA,NUP88,OGDH,PFKFB3,TAZ,AAAS,NME6,NUP42
3_Member	GO Biological Processes	GO:0009260	ribonucleotide biosynthetic process	-4.77733	-2.11717	16/293	205,353,498,863,3615,3939,4927,4967,5209,6901,7371,8086,10201,10606,11097,64834	AK4,APRT,ATP5F1A,CBFA2T3,IMPDH2,LDHA,NUP88,OGDH,PFKFB3,TAZ,UCK2,AAAS,NME6,PAICS,NUP42,ELOVL1
3_Member	GO Biological Processes	GO:0009145	purine nucleoside triphosphate biosynthetic process	-4.75234	-2.11717	12/172	205,498,863,3615,3939,4927,4967,5209,6901,8086,10201,11097	AK4,ATP5F1A,CBFA2T3,IMPDH2,LDHA,NUP88,OGDH,PFKFB3,TAZ,AAAS,NME6,NUP42
3_Member	GO Biological Processes	GO:0009141	nucleoside triphosphate metabolic process	-4.74955	-2.11717	18/362	205,498,863,3615,3939,4705,4723,4728,4927,4967,5209,6901,7298,7371,8086,8505,10201,11097	AK4,ATP5F1A,CBFA2T3,IMPDH2,LDHA,NDUFA10,NDUFV1,NDUFS8,NUP88,OGDH,PFKFB3,TAZ,TYMS,UCK2,AAAS,PARG,NME6,NUP42
3_Member	GO Biological Processes	GO:0006164	purine nucleotide biosynthetic process	-4.65178	-2.05326	16/300	205,353,498,863,3615,3939,4522,4927,4967,5209,6901,8086,10201,10606,11097,64834	AK4,APRT,ATP5F1A,CBFA2T3,IMPDH2,LDHA,MTHFD1,NUP88,OGDH,PFKFB3,TAZ,AAAS,NME6,PAICS,NUP42,ELOVL1
3_Member	GO Biological Processes	GO:0046390	ribose phosphate biosynthetic process	-4.65178	-2.05326	16/300	205,353,498,863,3615,3939,4927,4967,5209,6901,7371,8086,10201,10606,11097,64834	AK4,APRT,ATP5F1A,CBFA2T3,IMPDH2,LDHA,NUP88,OGDH,PFKFB3,TAZ,UCK2,AAAS,NME6,PAICS,NUP42,ELOVL1
3_Member	GO Biological Processes	GO:0009167	purine ribonucleoside monophosphate metabolic process	-4.53193	-1.9748	17/341	205,353,498,863,3615,3939,4705,4723,4728,4927,4967,5209,6901,8086,8505,10606,11097	AK4,APRT,ATP5F1A,CBFA2T3,IMPDH2,LDHA,NDUFA10,NDUFV1,NDUFS8,NUP88,OGDH,PFKFB3,TAZ,AAAS,PARG,PAICS,NUP42
3_Member	GO Biological Processes	GO:0009199	ribonucleoside triphosphate metabolic process	-4.53193	-1.9748	17/341	205,498,863,3615,3939,4705,4723,4728,4927,4967,5209,6901,7371,8086,8505,10201,11097	AK4,ATP5F1A,CBFA2T3,IMPDH2,LDHA,NDUFA10,NDUFV1,NDUFS8,NUP88,OGDH,PFKFB3,TAZ,UCK2,AAAS,PARG,NME6,NUP42
3_Member	GO Biological Processes	GO:0009126	purine nucleoside monophosphate metabolic process	-4.51591	-1.96854	17/342	205,353,498,863,3615,3939,4705,4723,4728,4927,4967,5209,6901,8086,8505,10606,11097	AK4,APRT,ATP5F1A,CBFA2T3,IMPDH2,LDHA,NDUFA10,NDUFV1,NDUFS8,NUP88,OGDH,PFKFB3,TAZ,AAAS,PARG,PAICS,NUP42
3_Member	GO Biological Processes	GO:0072522	purine-containing compound biosynthetic process	-4.429	-1.90967	16/313	205,353,498,863,3615,3939,4522,4927,4967,5209,6901,8086,10201,10606,11097,64834	AK4,APRT,ATP5F1A,CBFA2T3,IMPDH2,LDHA,MTHFD1,NUP88,OGDH,PFKFB3,TAZ,AAAS,NME6,PAICS,NUP42,ELOVL1
3_Member	GO Biological Processes	GO:0009152	purine ribonucleotide biosynthetic process	-4.41927	-1.90889	15/280	205,353,498,863,3615,3939,4927,4967,5209,6901,8086,10201,10606,11097,64834	AK4,APRT,ATP5F1A,CBFA2T3,IMPDH2,LDHA,NUP88,OGDH,PFKFB3,TAZ,AAAS,NME6,PAICS,NUP42,ELOVL1
3_Member	GO Biological Processes	GO:1901137	carbohydrate derivative biosynthetic process	-4.40783	-1.90837	28/776	205,353,498,596,863,2589,3615,3939,4927,4967,5209,5986,6382,6901,7298,7371,8086,8703,8706,10201,10606,11097,23236,23556,30815,64788,64834,64841	AK4,APRT,ATP5F1A,BCL2,CBFA2T3,GALNT1,IMPDH2,LDHA,NUP88,OGDH,PFKFB3,RFNG,SDC1,TAZ,TYMS,UCK2,AAAS,B4GALT3,B3GALNT1,NME6,PAICS,NUP42,PLCB1,PIGN,ST6GALNAC6,LMF1,ELOVL1,GNPNAT1
3_Member	GO Biological Processes	GO:0009165	nucleotide biosynthetic process	-4.38315	-1.90685	18/386	205,353,498,863,3615,3939,4522,4927,4967,5209,6901,7298,7371,8086,10201,10606,11097,64834	AK4,APRT,ATP5F1A,CBFA2T3,IMPDH2,LDHA,MTHFD1,NUP88,OGDH,PFKFB3,TAZ,TYMS,UCK2,AAAS,NME6,PAICS,NUP42,ELOVL1
3_Member	GO Biological Processes	GO:0006163	purine nucleotide metabolic process	-4.37015	-1.90197	23/576	205,353,498,863,3615,3939,4522,4705,4723,4728,4927,4967,5209,6901,8086,8505,10201,10606,11097,30833,54995,64834,80221	AK4,APRT,ATP5F1A,CBFA2T3,IMPDH2,LDHA,MTHFD1,NDUFA10,NDUFV1,NDUFS8,NUP88,OGDH,PFKFB3,TAZ,AAAS,PARG,NME6,PAICS,NUP42,NT5C,OXSM,ELOVL1,ACSF2
3_Member	GO Biological Processes	GO:1901293	nucleoside phosphate biosynthetic process	-4.32527	-1.87288	18/390	205,353,498,863,3615,3939,4522,4927,4967,5209,6901,7298,7371,8086,10201,10606,11097,64834	AK4,APRT,ATP5F1A,CBFA2T3,IMPDH2,LDHA,MTHFD1,NUP88,OGDH,PFKFB3,TAZ,TYMS,UCK2,AAAS,NME6,PAICS,NUP42,ELOVL1
3_Member	GO Biological Processes	GO:0009259	ribonucleotide metabolic process	-4.12397	-1.70656	22/558	205,353,498,863,3615,3939,4705,4723,4728,4927,4967,5209,6901,7371,8086,8505,10201,10606,11097,54995,64834,80221	AK4,APRT,ATP5F1A,CBFA2T3,IMPDH2,LDHA,NDUFA10,NDUFV1,NDUFS8,NUP88,OGDH,PFKFB3,TAZ,UCK2,AAAS,PARG,NME6,PAICS,NUP42,OXSM,ELOVL1,ACSF2
3_Member	GO Biological Processes	GO:0009205	purine ribonucleoside triphosphate metabolic process	-4.08007	-1.67881	16/335	205,498,863,3615,3939,4705,4723,4728,4927,4967,5209,6901,8086,8505,10201,11097	AK4,ATP5F1A,CBFA2T3,IMPDH2,LDHA,NDUFA10,NDUFV1,NDUFS8,NUP88,OGDH,PFKFB3,TAZ,AAAS,PARG,NME6,NUP42
3_Member	GO Biological Processes	GO:0009144	purine nucleoside triphosphate metabolic process	-3.97581	-1.58815	16/342	205,498,863,3615,3939,4705,4723,4728,4927,4967,5209,6901,8086,8505,10201,11097	AK4,ATP5F1A,CBFA2T3,IMPDH2,LDHA,NDUFA10,NDUFV1,NDUFS8,NUP88,OGDH,PFKFB3,TAZ,AAAS,PARG,NME6,NUP42
3_Member	GO Biological Processes	GO:0072521	purine-containing compound metabolic process	-3.96438	-1.58524	23/613	205,353,498,863,3615,3939,4522,4705,4723,4728,4927,4967,5209,6901,8086,8505,10201,10606,11097,30833,54995,64834,80221	AK4,APRT,ATP5F1A,CBFA2T3,IMPDH2,LDHA,MTHFD1,NDUFA10,NDUFV1,NDUFS8,NUP88,OGDH,PFKFB3,TAZ,AAAS,PARG,NME6,PAICS,NUP42,NT5C,OXSM,ELOVL1,ACSF2
3_Member	GO Biological Processes	GO:0090407	organophosphate biosynthetic process	-3.93351	-1.57803	25/699	205,353,472,498,863,3615,3939,4522,4927,4967,5209,5833,6901,7298,7371,8086,8566,8904,10201,10606,11097,23236,23556,51447,64834	AK4,APRT,ATM,ATP5F1A,CBFA2T3,IMPDH2,LDHA,MTHFD1,NUP88,OGDH,PFKFB3,PCYT2,TAZ,TYMS,UCK2,AAAS,PDXK,CPNE1,NME6,PAICS,NUP42,PLCB1,PIGN,IP6K2,ELOVL1
3_Member	GO Biological Processes	GO:0019693	ribose phosphate metabolic process	-3.9042	-1.55489	22/578	205,353,498,863,3615,3939,4705,4723,4728,4927,4967,5209,6901,7371,8086,8505,10201,10606,11097,54995,64834,80221	AK4,APRT,ATP5F1A,CBFA2T3,IMPDH2,LDHA,NDUFA10,NDUFV1,NDUFS8,NUP88,OGDH,PFKFB3,TAZ,UCK2,AAAS,PARG,NME6,PAICS,NUP42,OXSM,ELOVL1,ACSF2
3_Member	GO Biological Processes	GO:0009150	purine ribonucleotide metabolic process	-3.84647	-1.51512	21/543	205,353,498,863,3615,3939,4705,4723,4728,4927,4967,5209,6901,8086,8505,10201,10606,11097,54995,64834,80221	AK4,APRT,ATP5F1A,CBFA2T3,IMPDH2,LDHA,NDUFA10,NDUFV1,NDUFS8,NUP88,OGDH,PFKFB3,TAZ,AAAS,PARG,NME6,PAICS,NUP42,OXSM,ELOVL1,ACSF2
3_Member	GO Biological Processes	GO:0009117	nucleotide metabolic process	-3.82884	-1.50332	25/710	205,353,498,863,3615,3939,4522,4705,4723,4728,4927,4967,5209,6901,7298,7371,8086,8505,10201,10606,11097,30833,54995,64834,80221	AK4,APRT,ATP5F1A,CBFA2T3,IMPDH2,LDHA,MTHFD1,NDUFA10,NDUFV1,NDUFS8,NUP88,OGDH,PFKFB3,TAZ,TYMS,UCK2,AAAS,PARG,NME6,PAICS,NUP42,NT5C,OXSM,ELOVL1,ACSF2
3_Member	GO Biological Processes	GO:0006753	nucleoside phosphate metabolic process	-3.76364	-1.46615	25/717	205,353,498,863,3615,3939,4522,4705,4723,4728,4927,4967,5209,6901,7298,7371,8086,8505,10201,10606,11097,30833,54995,64834,80221	AK4,APRT,ATP5F1A,CBFA2T3,IMPDH2,LDHA,MTHFD1,NDUFA10,NDUFV1,NDUFS8,NUP88,OGDH,PFKFB3,TAZ,TYMS,UCK2,AAAS,PARG,NME6,PAICS,NUP42,NT5C,OXSM,ELOVL1,ACSF2
3_Member	GO Biological Processes	GO:0006754	ATP biosynthetic process	-3.66149	-1.39406	10/160	205,498,863,3939,4927,4967,5209,6901,8086,11097	AK4,ATP5F1A,CBFA2T3,LDHA,NUP88,OGDH,PFKFB3,TAZ,AAAS,NUP42
3_Member	GO Biological Processes	GO:0034404	nucleobase-containing small molecule biosynthetic process	-3.61359	-1.36725	12/226	353,863,3615,3939,4927,4967,5209,7371,8086,10201,11097,30833	APRT,CBFA2T3,IMPDH2,LDHA,NUP88,OGDH,PFKFB3,UCK2,AAAS,NME6,NUP42,NT5C
3_Member	GO Biological Processes	GO:0006165	nucleoside diphosphate phosphorylation	-3.58049	-1.3511	9/134	205,863,3939,4927,4967,5209,8086,10201,11097	AK4,CBFA2T3,LDHA,NUP88,OGDH,PFKFB3,AAAS,NME6,NUP42
3_Member	GO Biological Processes	GO:0046939	nucleotide phosphorylation	-3.53259	-1.32893	9/136	205,863,3939,4927,4967,5209,8086,10201,11097	AK4,CBFA2T3,LDHA,NUP88,OGDH,PFKFB3,AAAS,NME6,NUP42
3_Member	GO Biological Processes	GO:0046034	ATP metabolic process	-3.46602	-1.27828	14/305	205,498,863,3939,4705,4723,4728,4927,4967,5209,6901,8086,8505,11097	AK4,ATP5F1A,CBFA2T3,LDHA,NDUFA10,NDUFV1,NDUFS8,NUP88,OGDH,PFKFB3,TAZ,AAAS,PARG,NUP42
3_Member	GO Biological Processes	GO:2001169	regulation of ATP biosynthetic process	-3.11156	-1.04452	7/96	205,863,4927,5209,6901,8086,11097	AK4,CBFA2T3,NUP88,PFKFB3,TAZ,AAAS,NUP42
3_Member	GO Biological Processes	GO:0046031	ADP metabolic process	-3.08094	-1.03872	8/126	205,863,3939,4927,4967,5209,8086,11097	AK4,CBFA2T3,LDHA,NUP88,OGDH,PFKFB3,AAAS,NUP42
3_Member	GO Biological Processes	GO:0009132	nucleoside diphosphate metabolic process	-3.05951	-1.02329	9/158	205,863,3939,4927,4967,5209,8086,10201,11097	AK4,CBFA2T3,LDHA,NUP88,OGDH,PFKFB3,AAAS,NME6,NUP42
3_Member	GO Biological Processes	GO:0009135	purine nucleoside diphosphate metabolic process	-2.82598	-0.865952	8/138	205,863,3939,4927,4967,5209,8086,11097	AK4,CBFA2T3,LDHA,NUP88,OGDH,PFKFB3,AAAS,NUP42
3_Member	GO Biological Processes	GO:0009179	purine ribonucleoside diphosphate metabolic process	-2.82598	-0.865952	8/138	205,863,3939,4927,4967,5209,8086,11097	AK4,CBFA2T3,LDHA,NUP88,OGDH,PFKFB3,AAAS,NUP42
3_Member	GO Biological Processes	GO:0009185	ribonucleoside diphosphate metabolic process	-2.7863	-0.843406	8/140	205,863,3939,4927,4967,5209,8086,11097	AK4,CBFA2T3,LDHA,NUP88,OGDH,PFKFB3,AAAS,NUP42
3_Member	GO Biological Processes	GO:0031503	protein-containing complex localization	-2.78283	-0.843198	12/281	332,472,1785,4927,6428,8086,8650,10212,11097,27092,55308,57728	BIRC5,ATM,DNM2,NUP88,SRSF3,AAAS,NUMB,DDX39A,NUP42,CACNG4,DDX19A,WDR19
3_Member	GO Biological Processes	GO:0006096	glycolytic process	-2.65529	-0.766467	7/115	863,3939,4927,4967,5209,8086,11097	CBFA2T3,LDHA,NUP88,OGDH,PFKFB3,AAAS,NUP42
3_Member	GO Biological Processes	GO:0006757	ATP generation from ADP	-2.63399	-0.753556	7/116	863,3939,4927,4967,5209,8086,11097	CBFA2T3,LDHA,NUP88,OGDH,PFKFB3,AAAS,NUP42
3_Member	GO Biological Processes	GO:1900371	regulation of purine nucleotide biosynthetic process	-2.61292	-0.740722	7/117	205,863,4927,5209,6901,8086,11097	AK4,CBFA2T3,NUP88,PFKFB3,TAZ,AAAS,NUP42
3_Member	GO Biological Processes	GO:0072525	pyridine-containing compound biosynthetic process	-2.59864	-0.735934	8/150	863,3939,4927,4967,5209,8086,8566,11097	CBFA2T3,LDHA,NUP88,OGDH,PFKFB3,AAAS,PDXK,NUP42
3_Member	GO Biological Processes	GO:0030808	regulation of nucleotide biosynthetic process	-2.59209	-0.735934	7/118	205,863,4927,5209,6901,8086,11097	AK4,CBFA2T3,NUP88,PFKFB3,TAZ,AAAS,NUP42
3_Member	GO Biological Processes	GO:0042866	pyruvate biosynthetic process	-2.57148	-0.726929	7/119	863,3939,4927,4967,5209,8086,11097	CBFA2T3,LDHA,NUP88,OGDH,PFKFB3,AAAS,NUP42
3_Member	GO Biological Processes	GO:1903578	regulation of ATP metabolic process	-2.511	-0.686995	7/122	205,863,4927,5209,6901,8086,11097	AK4,CBFA2T3,NUP88,PFKFB3,TAZ,AAAS,NUP42
3_Member	GO Biological Processes	GO:0006732	coenzyme metabolic process	-2.31242	-0.559004	14/405	863,3939,4522,4927,4967,5209,7298,8086,8566,8836,11097,54995,64834,80221	CBFA2T3,LDHA,MTHFD1,NUP88,OGDH,PFKFB3,TYMS,AAAS,PDXK,GGH,NUP42,OXSM,ELOVL1,ACSF2
3_Member	GO Biological Processes	GO:0051188	cofactor biosynthetic process	-2.26282	-0.534998	12/326	863,3939,4522,4927,4967,5209,7390,8086,8566,11097,64834,79094	CBFA2T3,LDHA,MTHFD1,NUP88,OGDH,PFKFB3,UROS,AAAS,PDXK,NUP42,ELOVL1,CHAC1
3_Member	GO Biological Processes	GO:0044766	multi-organism transport	-2.24495	-0.530093	5/73	4927,6950,7311,8086,11097	NUP88,TCP1,UBA52,AAAS,NUP42
3_Member	GO Biological Processes	GO:1902579	multi-organism localization	-2.24495	-0.530093	5/73	4927,6950,7311,8086,11097	NUP88,TCP1,UBA52,AAAS,NUP42
3_Member	GO Biological Processes	GO:0034605	cellular response to heat	-2.21869	-0.509474	7/138	472,4927,7057,7266,8086,11097,79752	ATM,NUP88,THBS1,DNAJC7,AAAS,NUP42,ZFAND1
3_Member	GO Biological Processes	GO:1900542	regulation of purine nucleotide metabolic process	-2.15267	-0.461292	7/142	205,863,4927,5209,6901,8086,11097	AK4,CBFA2T3,NUP88,PFKFB3,TAZ,AAAS,NUP42
3_Member	GO Biological Processes	GO:0051186	cofactor metabolic process	-2.14995	-0.459915	18/604	863,3939,4522,4927,4967,5209,7298,7390,8086,8566,8836,11097,54995,64210,64834,79094,80221,171425	CBFA2T3,LDHA,MTHFD1,NUP88,OGDH,PFKFB3,TYMS,UROS,AAAS,PDXK,GGH,NUP42,OXSM,MMS19,ELOVL1,CHAC1,ACSF2,CLYBL
3_Member	GO Biological Processes	GO:0006110	regulation of glycolytic process	-2.1015	-0.429835	5/79	863,4927,5209,8086,11097	CBFA2T3,NUP88,PFKFB3,AAAS,NUP42
3_Member	GO Biological Processes	GO:1900034	regulation of cellular response to heat	-2.1015	-0.429835	5/79	472,4927,7266,8086,11097	ATM,NUP88,DNAJC7,AAAS,NUP42
3_Member	GO Biological Processes	GO:0006406	mRNA export from nucleus	-2.09813	-0.429036	6/111	4927,6428,8086,10212,11097,55308	NUP88,SRSF3,AAAS,DDX39A,NUP42,DDX19A
3_Member	GO Biological Processes	GO:0071427	mRNA-containing ribonucleoprotein complex export from nucleus	-2.09813	-0.429036	6/111	4927,6428,8086,10212,11097,55308	NUP88,SRSF3,AAAS,DDX39A,NUP42,DDX19A
3_Member	GO Biological Processes	GO:0006140	regulation of nucleotide metabolic process	-2.08914	-0.422057	7/146	205,863,4927,5209,6901,8086,11097	AK4,CBFA2T3,NUP88,PFKFB3,TAZ,AAAS,NUP42
3_Member	GO Biological Processes	GO:0009108	coenzyme biosynthetic process	-2.0844	-0.422057	10/261	863,3939,4522,4927,4967,5209,8086,8566,11097,64834	CBFA2T3,LDHA,MTHFD1,NUP88,OGDH,PFKFB3,AAAS,PDXK,NUP42,ELOVL1
3_Member	GO Biological Processes	GO:0009166	nucleotide catabolic process	-2.08333	-0.422057	8/183	863,3939,4927,4967,5209,8086,11097,30833	CBFA2T3,LDHA,NUP88,OGDH,PFKFB3,AAAS,NUP42,NT5C
3_Member	GO Biological Processes	GO:0019359	nicotinamide nucleotide biosynthetic process	-2.07363	-0.422057	7/147	863,3939,4927,4967,5209,8086,11097	CBFA2T3,LDHA,NUP88,OGDH,PFKFB3,AAAS,NUP42
3_Member	GO Biological Processes	GO:0019363	pyridine nucleotide biosynthetic process	-2.07363	-0.422057	7/147	863,3939,4927,4967,5209,8086,11097	CBFA2T3,LDHA,NUP88,OGDH,PFKFB3,AAAS,NUP42
3_Member	GO Biological Processes	GO:0030811	regulation of nucleotide catabolic process	-2.0567	-0.411218	5/81	863,4927,5209,8086,11097	CBFA2T3,NUP88,PFKFB3,AAAS,NUP42
3_Member	GO Biological Processes	GO:1901292	nucleoside phosphate catabolic process	-2.00359	-0.37004	8/189	863,3939,4927,4967,5209,8086,11097,30833	CBFA2T3,LDHA,NUP88,OGDH,PFKFB3,AAAS,NUP42,NT5C
3_Member	GO Biological Processes	GO:0006403	RNA localization	-1.96933	-0.34937	9/231	472,4927,6428,6950,7263,8086,10212,11097,55308	ATM,NUP88,SRSF3,TCP1,TST,AAAS,DDX39A,NUP42,DDX19A
3_Member	GO Biological Processes	GO:0006090	pyruvate metabolic process	-1.96902	-0.34937	7/154	863,3939,4927,4967,5209,8086,11097	CBFA2T3,LDHA,NUP88,OGDH,PFKFB3,AAAS,NUP42
3_Member	GO Biological Processes	GO:0051193	regulation of cofactor metabolic process	-1.95734	-0.34109	6/119	863,4927,5209,8086,11097,171425	CBFA2T3,NUP88,PFKFB3,AAAS,NUP42,CLYBL
3_Member	GO Biological Processes	GO:0075733	intracellular transport of virus	-1.91921	-0.318332	4/57	4927,7311,8086,11097	NUP88,UBA52,AAAS,NUP42
3_Member	GO Biological Processes	GO:0051236	establishment of RNA localization	-1.91508	-0.318332	8/196	472,4927,6428,7263,8086,10212,11097,55308	ATM,NUP88,SRSF3,TST,AAAS,DDX39A,NUP42,DDX19A
3_Member	GO Biological Processes	GO:0072524	pyridine-containing compound metabolic process	-1.91508	-0.318332	8/196	863,3939,4927,4967,5209,8086,8566,11097	CBFA2T3,LDHA,NUP88,OGDH,PFKFB3,AAAS,PDXK,NUP42
3_Member	GO Biological Processes	GO:0043470	regulation of carbohydrate catabolic process	-1.91038	-0.318332	5/88	863,4927,5209,8086,11097	CBFA2T3,NUP88,PFKFB3,AAAS,NUP42
3_Member	GO Biological Processes	GO:0016052	carbohydrate catabolic process	-1.87855	-0.293924	8/199	863,3939,4123,4927,4967,5209,8086,11097	CBFA2T3,LDHA,MAN2C1,NUP88,OGDH,PFKFB3,AAAS,NUP42
3_Member	GO Biological Processes	GO:0046794	transport of virus	-1.84346	-0.268194	4/60	4927,7311,8086,11097	NUP88,UBA52,AAAS,NUP42
3_Member	GO Biological Processes	GO:0071426	ribonucleoprotein complex export from nucleus	-1.82874	-0.257569	6/127	4927,6428,8086,10212,11097,55308	NUP88,SRSF3,AAAS,DDX39A,NUP42,DDX19A
3_Member	GO Biological Processes	GO:0071166	ribonucleoprotein complex localization	-1.81344	-0.244306	6/128	4927,6428,8086,10212,11097,55308	NUP88,SRSF3,AAAS,DDX39A,NUP42,DDX19A
3_Member	GO Biological Processes	GO:0006409	tRNA export from nucleus	-1.80186	-0.236713	3/34	4927,8086,11097	NUP88,AAAS,NUP42
3_Member	GO Biological Processes	GO:0071431	tRNA-containing ribonucleoprotein complex export from nucleus	-1.80186	-0.236713	3/34	4927,8086,11097	NUP88,AAAS,NUP42
3_Member	GO Biological Processes	GO:0051196	regulation of coenzyme metabolic process	-1.77839	-0.222255	5/95	863,4927,5209,8086,11097	CBFA2T3,NUP88,PFKFB3,AAAS,NUP42
3_Member	GO Biological Processes	GO:0051031	tRNA transport	-1.73505	-0.193436	3/36	4927,8086,11097	NUP88,AAAS,NUP42
3_Member	GO Biological Processes	GO:0006405	RNA export from nucleus	-1.7108	-0.177551	6/135	4927,6428,8086,10212,11097,55308	NUP88,SRSF3,AAAS,DDX39A,NUP42,DDX19A
3_Member	GO Biological Processes	GO:0097064	ncRNA export from nucleus	-1.67249	-0.154958	3/38	4927,8086,11097	NUP88,AAAS,NUP42
3_Member	GO Biological Processes	GO:0009408	response to heat	-1.66789	-0.151262	7/177	472,4927,7057,7266,8086,11097,79752	ATM,NUP88,THBS1,DNAJC7,AAAS,NUP42,ZFAND1
3_Member	GO Biological Processes	GO:0019362	pyridine nucleotide metabolic process	-1.53256	-0.0611461	7/189	863,3939,4927,4967,5209,8086,11097	CBFA2T3,LDHA,NUP88,OGDH,PFKFB3,AAAS,NUP42
3_Member	GO Biological Processes	GO:0046496	nicotinamide nucleotide metabolic process	-1.53256	-0.0611461	7/189	863,3939,4927,4967,5209,8086,11097	CBFA2T3,LDHA,NUP88,OGDH,PFKFB3,AAAS,NUP42
3_Member	GO Biological Processes	GO:0050657	nucleic acid transport	-1.49029	-0.0366122	7/193	4927,6428,7263,8086,10212,11097,55308	NUP88,SRSF3,TST,AAAS,DDX39A,NUP42,DDX19A
3_Member	GO Biological Processes	GO:0050658	RNA transport	-1.49029	-0.0366122	7/193	4927,6428,7263,8086,10212,11097,55308	NUP88,SRSF3,TST,AAAS,DDX39A,NUP42,DDX19A
3_Member	GO Biological Processes	GO:0051028	mRNA transport	-1.49005	-0.0366122	6/152	4927,6428,8086,10212,11097,55308	NUP88,SRSF3,AAAS,DDX39A,NUP42,DDX19A
3_Member	GO Biological Processes	GO:0005975	carbohydrate metabolic process	-1.42144	0	16/626	863,1390,3419,3939,4123,4927,4967,5209,8086,8505,8703,8706,11097,30815,54414,57486	CBFA2T3,CREM,IDH3A,LDHA,MAN2C1,NUP88,OGDH,PFKFB3,AAAS,PARG,B4GALT3,B3GALNT1,NUP42,ST6GALNAC6,SIAE,NLN
3_Member	GO Biological Processes	GO:0043467	regulation of generation of precursor metabolites and energy	-1.42048	0	6/158	205,863,4927,5209,8086,11097	AK4,CBFA2T3,NUP88,PFKFB3,AAAS,NUP42
3_Member	GO Biological Processes	GO:0009266	response to temperature stimulus	-1.41527	0	8/244	472,4927,5935,7057,7266,8086,11097,79752	ATM,NUP88,RBM3,THBS1,DNAJC7,AAAS,NUP42,ZFAND1
3_Member	GO Biological Processes	GO:0046434	organophosphate catabolic process	-1.37209	0	8/249	863,3939,4927,4967,5209,8086,11097,30833	CBFA2T3,LDHA,NUP88,OGDH,PFKFB3,AAAS,NUP42,NT5C
3_Member	GO Biological Processes	GO:0006733	oxidoreduction coenzyme metabolic process	-1.35238	0	7/207	863,3939,4927,4967,5209,8086,11097	CBFA2T3,LDHA,NUP88,OGDH,PFKFB3,AAAS,NUP42
4_Summary	GO Biological Processes	GO:0051301	cell division	-5.52155	-2.49707	26/598	332,2035,2263,4085,4192,5413,6790,7005,7153,8650,9270,9400,9493,10388,10615,10783,10801,10899,11004,25906,51203,54892,55521,91782,219771,387893	BIRC5,EPB41,FGFR2,MAD2L1,MDK,SEPTIN5,AURKA,TEAD3,TOP2A,NUMB,ITGB1BP1,RECQL5,KIF23,SYCP2,SPAG5,NEK6,SEPTIN9,JTB,KIF2C,ANAPC15,NUSAP1,NCAPG2,TRIM36,CHMP7,CCNY,KMT5A
4_Member	GO Biological Processes	GO:0051301	cell division	-5.52155	-2.49707	26/598	332,2035,2263,4085,4192,5413,6790,7005,7153,8650,9270,9400,9493,10388,10615,10783,10801,10899,11004,25906,51203,54892,55521,91782,219771,387893	BIRC5,EPB41,FGFR2,MAD2L1,MDK,SEPTIN5,AURKA,TEAD3,TOP2A,NUMB,ITGB1BP1,RECQL5,KIF23,SYCP2,SPAG5,NEK6,SEPTIN9,JTB,KIF2C,ANAPC15,NUSAP1,NCAPG2,TRIM36,CHMP7,CCNY,KMT5A
4_Member	GO Biological Processes	GO:0061640	cytoskeleton-dependent cytokinesis	-3.00649	-0.990605	7/100	5413,9493,10801,10899,51203,55521,91782	SEPTIN5,KIF23,SEPTIN9,JTB,NUSAP1,TRIM36,CHMP7
4_Member	GO Biological Processes	GO:0000910	cytokinesis	-2.25461	-0.530093	8/171	5413,6790,9493,10801,10899,51203,55521,91782	SEPTIN5,AURKA,KIF23,SEPTIN9,JTB,NUSAP1,TRIM36,CHMP7
4_Member	GO Biological Processes	GO:0000281	mitotic cytokinesis	-2.24495	-0.530093	5/73	9493,10899,51203,55521,91782	KIF23,JTB,NUSAP1,TRIM36,CHMP7
5_Summary	GO Biological Processes	GO:0000724	double-strand break repair via homologous recombination	-5.06672	-2.24636	11/134	472,4176,5889,9400,9907,23514,25788,51149,64210,64710,348654,2966,3146,5422,5425,7311,8505,9960,23201,54929,63967,5570,6950,8550,11124,79977,10040,29980,596,387893,7153,655,4690,4927,7266,8086,9709,10018,10771,10783,11097,23236,26156,55074,91782	ATM,MCM7,RAD51C,RECQL5,AP5Z1,SPIDR,RAD54B,MRNIP,MMS19,NUCKS1,GEN1,GTF2H2,HMGB1,POLA1,POLD2,UBA52,PARG,USP3,FAM168A,TMEM161A,CLSPN,PKIB,TCP1,MAPKAPK5,FAF1,GRHL2,TOM1L1,DONSON,BCL2,KMT5A,TOP2A,BMP7,NCK1,NUP88,DNAJC7,AAAS,HERPUD1,BCL2L11,ZMYND11,NEK6,NUP42,PLCB1,RSL1D1,OXR1,CHMP7
5_Member	GO Biological Processes	GO:0000724	double-strand break repair via homologous recombination	-5.06672	-2.24636	11/134	472,4176,5889,9400,9907,23514,25788,51149,64210,64710,348654	ATM,MCM7,RAD51C,RECQL5,AP5Z1,SPIDR,RAD54B,MRNIP,MMS19,NUCKS1,GEN1
5_Member	GO Biological Processes	GO:0000725	recombinational repair	-5.03583	-2.23319	11/135	472,4176,5889,9400,9907,23514,25788,51149,64210,64710,348654	ATM,MCM7,RAD51C,RECQL5,AP5Z1,SPIDR,RAD54B,MRNIP,MMS19,NUCKS1,GEN1
5_Member	GO Biological Processes	GO:0006281	DNA repair	-3.73838	-1.44629	21/553	472,2966,3146,4176,5422,5425,5889,7311,8505,9400,9907,9960,23201,23514,25788,51149,54929,63967,64210,64710,348654	ATM,GTF2H2,HMGB1,MCM7,POLA1,POLD2,RAD51C,UBA52,PARG,RECQL5,AP5Z1,USP3,FAM168A,SPIDR,RAD54B,MRNIP,TMEM161A,CLSPN,MMS19,NUCKS1,GEN1
5_Member	GO Biological Processes	GO:0051054	positive regulation of DNA metabolic process	-3.57855	-1.3511	12/228	472,3146,5570,6950,8550,11124,23201,23514,51149,54929,64210,79977	ATM,HMGB1,PKIB,TCP1,MAPKAPK5,FAF1,FAM168A,SPIDR,MRNIP,TMEM161A,MMS19,GRHL2
5_Member	GO Biological Processes	GO:0051052	regulation of DNA metabolic process	-3.31553	-1.16612	17/431	472,3146,5570,6950,8505,8550,9400,10040,11124,23201,23514,29980,51149,54929,64210,64710,79977	ATM,HMGB1,PKIB,TCP1,PARG,MAPKAPK5,RECQL5,TOM1L1,FAF1,FAM168A,SPIDR,DONSON,MRNIP,TMEM161A,MMS19,NUCKS1,GRHL2
5_Member	GO Biological Processes	GO:0045739	positive regulation of DNA repair	-3.27723	-1.14111	6/65	3146,23201,23514,51149,54929,64210	HMGB1,FAM168A,SPIDR,MRNIP,TMEM161A,MMS19
5_Member	GO Biological Processes	GO:0006302	double-strand break repair	-3.25007	-1.11768	12/248	472,4176,5422,5889,9400,9907,23514,25788,51149,64210,64710,348654	ATM,MCM7,POLA1,RAD51C,RECQL5,AP5Z1,SPIDR,RAD54B,MRNIP,MMS19,NUCKS1,GEN1
5_Member	GO Biological Processes	GO:2001020	regulation of response to DNA damage stimulus	-3.24059	-1.11556	11/214	472,596,3146,8505,9400,23201,23514,51149,54929,64210,387893	ATM,BCL2,HMGB1,PARG,RECQL5,FAM168A,SPIDR,MRNIP,TMEM161A,MMS19,KMT5A
5_Member	GO Biological Processes	GO:0006282	regulation of DNA repair	-3.17301	-1.07176	8/122	3146,8505,9400,23201,23514,51149,54929,64210	HMGB1,PARG,RECQL5,FAM168A,SPIDR,MRNIP,TMEM161A,MMS19
5_Member	GO Biological Processes	GO:0006310	DNA recombination	-3.12122	-1.04452	13/293	472,3146,4176,5889,7153,9400,9907,23514,25788,51149,64210,64710,348654	ATM,HMGB1,MCM7,RAD51C,TOP2A,RECQL5,AP5Z1,SPIDR,RAD54B,MRNIP,MMS19,NUCKS1,GEN1
5_Member	GO Biological Processes	GO:0080135	regulation of cellular response to stress	-3.11333	-1.04452	24/749	472,596,655,3146,4690,4927,7266,8086,8505,9400,9709,10018,10771,10783,11097,23201,23236,23514,26156,51149,54929,55074,64210,387893	ATM,BCL2,BMP7,HMGB1,NCK1,NUP88,DNAJC7,AAAS,PARG,RECQL5,HERPUD1,BCL2L11,ZMYND11,NEK6,NUP42,FAM168A,PLCB1,SPIDR,RSL1D1,MRNIP,TMEM161A,OXR1,MMS19,KMT5A
5_Member	GO Biological Processes	GO:2001022	positive regulation of response to DNA damage stimulus	-3.08478	-1.03872	7/97	472,3146,23201,23514,51149,54929,64210	ATM,HMGB1,FAM168A,SPIDR,MRNIP,TMEM161A,MMS19
5_Member	GO Biological Processes	GO:0010569	regulation of double-strand break repair via homologous recombination	-2.27944	-0.541261	4/45	9400,23514,51149,64210	RECQL5,SPIDR,MRNIP,MMS19
5_Member	GO Biological Processes	GO:2000781	positive regulation of double-strand break repair	-1.91125	-0.318332	3/31	23514,51149,64210	SPIDR,MRNIP,MMS19
5_Member	GO Biological Processes	GO:2000779	regulation of double-strand break repair	-1.48879	-0.0366122	4/77	9400,23514,51149,64210	RECQL5,SPIDR,MRNIP,MMS19
5_Member	GO Biological Processes	GO:0034502	protein localization to chromosome	-1.40326	0	4/82	6950,23514,51149,91782	TCP1,SPIDR,MRNIP,CHMP7
6_Summary	GO Biological Processes	GO:0043043	peptide biosynthetic process	-4.77381	-2.11717	28/740	1615,1802,1964,3488,4690,4736,5935,6122,6144,6152,6229,7057,7298,7311,8550,9045,10658,26065,26986,28957,51258,51389,51520,55037,65003,79094,79731,85451	DARS1,DPH2,EIF1AX,IGFBP5,NCK1,RPL10A,RBM3,RPL3,RPL21,RPL24,RPS24,THBS1,TYMS,UBA52,MAPKAPK5,RPL14,CELF1,LSM14A,PABPC1,MRPS28,MRPL51,RWDD1,LARS1,PTCD3,MRPL11,CHAC1,NARS2,UNK
6_Member	GO Biological Processes	GO:0043043	peptide biosynthetic process	-4.77381	-2.11717	28/740	1615,1802,1964,3488,4690,4736,5935,6122,6144,6152,6229,7057,7298,7311,8550,9045,10658,26065,26986,28957,51258,51389,51520,55037,65003,79094,79731,85451	DARS1,DPH2,EIF1AX,IGFBP5,NCK1,RPL10A,RBM3,RPL3,RPL21,RPL24,RPS24,THBS1,TYMS,UBA52,MAPKAPK5,RPL14,CELF1,LSM14A,PABPC1,MRPS28,MRPL51,RWDD1,LARS1,PTCD3,MRPL11,CHAC1,NARS2,UNK
6_Member	GO Biological Processes	GO:0006412	translation	-4.60731	-2.01951	27/715	1615,1802,1964,3488,4690,4736,5935,6122,6144,6152,6229,7057,7298,7311,8550,9045,10658,26065,26986,28957,51258,51389,51520,55037,65003,79731,85451	DARS1,DPH2,EIF1AX,IGFBP5,NCK1,RPL10A,RBM3,RPL3,RPL21,RPL24,RPS24,THBS1,TYMS,UBA52,MAPKAPK5,RPL14,CELF1,LSM14A,PABPC1,MRPS28,MRPL51,RWDD1,LARS1,PTCD3,MRPL11,NARS2,UNK
6_Member	GO Biological Processes	GO:0006417	regulation of translation	-1.44517	-0.00873218	12/425	1802,3488,4690,5935,7057,7298,8550,10658,26065,26986,55037,85451	DPH2,IGFBP5,NCK1,RBM3,THBS1,TYMS,MAPKAPK5,CELF1,LSM14A,PABPC1,PTCD3,UNK
7_Summary	GO Biological Processes	GO:0010638	positive regulation of organelle organization	-4.27939	-1.83469	24/624	472,596,2885,2966,3720,4088,4690,5570,6382,6790,6950,8550,9270,9520,9787,9948,10018,10095,10615,10733,10801,23236,51203,94104,4192,5747,6047,22836,50861,55521,57580,348654,655,1785,11124,23514,1289,11004,29911,29993,51019,84942,344148	ATM,BCL2,GRB2,GTF2H2,JARID2,SMAD3,NCK1,PKIB,SDC1,AURKA,TCP1,MAPKAPK5,ITGB1BP1,NPEPPS,DLGAP5,WDR1,BCL2L11,ARPC1B,SPAG5,PLK4,SEPTIN9,PLCB1,NUSAP1,PAXBP1,MDK,PTK2,RNF4,RHOBTB3,STMN3,TRIM36,PREX1,GEN1,BMP7,DNM2,FAF1,SPIDR,COL5A1,KIF2C,HOOK2,PACSIN1,WASHC3,WDR73,NCKAP5
7_Member	GO Biological Processes	GO:0010638	positive regulation of organelle organization	-4.27939	-1.83469	24/624	472,596,2885,2966,3720,4088,4690,5570,6382,6790,6950,8550,9270,9520,9787,9948,10018,10095,10615,10733,10801,23236,51203,94104	ATM,BCL2,GRB2,GTF2H2,JARID2,SMAD3,NCK1,PKIB,SDC1,AURKA,TCP1,MAPKAPK5,ITGB1BP1,NPEPPS,DLGAP5,WDR1,BCL2L11,ARPC1B,SPAG5,PLK4,SEPTIN9,PLCB1,NUSAP1,PAXBP1
7_Member	GO Biological Processes	GO:0051493	regulation of cytoskeleton organization	-2.33296	-0.570371	17/534	2885,4088,4192,4690,5747,6047,6790,9270,9948,10095,10615,10733,22836,50861,55521,57580,348654	GRB2,SMAD3,MDK,NCK1,PTK2,RNF4,AURKA,ITGB1BP1,WDR1,ARPC1B,SPAG5,PLK4,RHOBTB3,STMN3,TRIM36,PREX1,GEN1
7_Member	GO Biological Processes	GO:0044089	positive regulation of cellular component biogenesis	-1.93889	-0.330493	16/541	472,655,1785,2885,2966,4088,4690,6382,9270,10018,10095,10615,10733,10801,11124,23514	ATM,BMP7,DNM2,GRB2,GTF2H2,SMAD3,NCK1,SDC1,ITGB1BP1,BCL2L11,ARPC1B,SPAG5,PLK4,SEPTIN9,FAF1,SPIDR
7_Member	GO Biological Processes	GO:0051495	positive regulation of cytoskeleton organization	-1.58332	-0.0931114	8/226	2885,4088,4690,9270,9948,10095,10615,10733	GRB2,SMAD3,NCK1,ITGB1BP1,WDR1,ARPC1B,SPAG5,PLK4
7_Member	GO Biological Processes	GO:0097435	supramolecular fiber organization	-1.43492	-0.00248904	17/674	596,1289,2885,4088,4690,9270,9948,10095,11004,22836,29911,29993,50861,51019,57580,84942,344148	BCL2,COL5A1,GRB2,SMAD3,NCK1,ITGB1BP1,WDR1,ARPC1B,KIF2C,RHOBTB3,HOOK2,PACSIN1,STMN3,WASHC3,PREX1,WDR73,NCKAP5
8_Summary	GO Biological Processes	GO:0048701	embryonic cranial skeleton morphogenesis	-4.16963	-1.73991	6/45	2263,2778,4088,4522,57728,79977,655,5979,9270,10018,10806,11146,115908,472,2885,4071,10658,10733,23326,25949,26227,27077,50861,54892,55959,85451,596,760,1289,3488,4192,5695,5710,9948,329,5747,6382,10388,22836,4147,51741,6790,9702,9678	FGFR2,GNAS,SMAD3,MTHFD1,WDR19,GRHL2,BMP7,RET,ITGB1BP1,BCL2L11,SDCCAG8,GLMN,CTHRC1,ATM,GRB2,TM4SF1,CELF1,PLK4,USP22,SYF2,PHGDH,B9D1,STMN3,NCAPG2,SULF2,UNK,BCL2,CA2,COL5A1,IGFBP5,MDK,PSMB7,PSMD4,WDR1,BIRC2,PTK2,SDC1,SYCP2,RHOBTB3,MATN2,WWOX,AURKA,CEP57,PHF14
8_Member	GO Biological Processes	GO:0048701	embryonic cranial skeleton morphogenesis	-4.16963	-1.73991	6/45	2263,2778,4088,4522,57728,79977	FGFR2,GNAS,SMAD3,MTHFD1,WDR19,GRHL2
8_Member	GO Biological Processes	GO:0035148	tube formation	-3.93893	-1.57803	10/148	655,2263,4522,5979,9270,10018,10806,11146,79977,115908	BMP7,FGFR2,MTHFD1,RET,ITGB1BP1,BCL2L11,SDCCAG8,GLMN,GRHL2,CTHRC1
8_Member	GO Biological Processes	GO:0009792	embryo development ending in birth or egg hatching	-3.63441	-1.38048	23/646	472,655,2263,2778,2885,4071,4088,4522,10018,10658,10733,11146,23326,25949,26227,27077,50861,54892,55959,57728,79977,85451,115908	ATM,BMP7,FGFR2,GNAS,GRB2,TM4SF1,SMAD3,MTHFD1,BCL2L11,CELF1,PLK4,GLMN,USP22,SYF2,PHGDH,B9D1,STMN3,NCAPG2,SULF2,WDR19,GRHL2,UNK,CTHRC1
8_Member	GO Biological Processes	GO:0060713	labyrinthine layer morphogenesis	-3.54785	-1.33404	4/21	655,2263,2885,79977	BMP7,FGFR2,GRB2,GRHL2
8_Member	GO Biological Processes	GO:1904888	cranial skeletal system development	-3.2415	-1.11556	6/66	2263,2778,4088,4522,57728,79977	FGFR2,GNAS,SMAD3,MTHFD1,WDR19,GRHL2
8_Member	GO Biological Processes	GO:0048704	embryonic skeletal system morphogenesis	-3.19402	-1.07623	7/93	655,2263,2778,4088,4522,57728,79977	BMP7,FGFR2,GNAS,SMAD3,MTHFD1,WDR19,GRHL2
8_Member	GO Biological Processes	GO:0060669	embryonic placenta morphogenesis	-3.17701	-1.07176	4/26	655,2263,2885,79977	BMP7,FGFR2,GRB2,GRHL2
8_Member	GO Biological Processes	GO:0060670	branching involved in labyrinthine layer morphogenesis	-3.12651	-1.0465	3/12	2263,2885,79977	FGFR2,GRB2,GRHL2
8_Member	GO Biological Processes	GO:0048706	embryonic skeletal system development	-3.08094	-1.03872	8/126	655,2263,2778,4088,4522,55959,57728,79977	BMP7,FGFR2,GNAS,SMAD3,MTHFD1,SULF2,WDR19,GRHL2
8_Member	GO Biological Processes	GO:0043009	chordate embryonic development	-3.0101	-0.991365	21/629	472,655,2263,2778,2885,4071,4088,4522,10018,10733,11146,25949,26227,27077,50861,54892,55959,57728,79977,85451,115908	ATM,BMP7,FGFR2,GNAS,GRB2,TM4SF1,SMAD3,MTHFD1,BCL2L11,PLK4,GLMN,SYF2,PHGDH,B9D1,STMN3,NCAPG2,SULF2,WDR19,GRHL2,UNK,CTHRC1
8_Member	GO Biological Processes	GO:0001701	in utero embryonic development	-2.60785	-0.73769	14/375	655,2263,2885,4071,4088,10018,10733,25949,27077,50861,54892,57728,79977,85451	BMP7,FGFR2,GRB2,TM4SF1,SMAD3,BCL2L11,PLK4,SYF2,B9D1,STMN3,NCAPG2,WDR19,GRHL2,UNK
8_Member	GO Biological Processes	GO:0072175	epithelial tube formation	-2.32274	-0.563071	7/132	655,2263,4522,5979,11146,79977,115908	BMP7,FGFR2,MTHFD1,RET,GLMN,GRHL2,CTHRC1
8_Member	GO Biological Processes	GO:0002009	morphogenesis of an epithelium	-2.28559	-0.541261	17/540	596,655,760,1289,2263,2885,3488,4088,4192,4522,5695,5710,5979,9948,11146,79977,115908	BCL2,BMP7,CA2,COL5A1,FGFR2,GRB2,IGFBP5,SMAD3,MDK,MTHFD1,PSMB7,PSMD4,RET,WDR1,GLMN,GRHL2,CTHRC1
8_Member	GO Biological Processes	GO:0060711	labyrinthine layer development	-2.24521	-0.530093	4/46	655,2263,2885,79977	BMP7,FGFR2,GRB2,GRHL2
8_Member	GO Biological Processes	GO:0048608	reproductive structure development	-2.07579	-0.422057	14/432	329,472,596,655,2263,2885,5747,6382,10018,10388,10733,22836,57728,79977	BIRC2,ATM,BCL2,BMP7,FGFR2,GRB2,PTK2,SDC1,BCL2L11,SYCP2,PLK4,RHOBTB3,WDR19,GRHL2
8_Member	GO Biological Processes	GO:0035107	appendage morphogenesis	-2.05827	-0.411573	7/148	655,2263,2778,10018,27077,57728,79977	BMP7,FGFR2,GNAS,BCL2L11,B9D1,WDR19,GRHL2
8_Member	GO Biological Processes	GO:0035108	limb morphogenesis	-2.05827	-0.411573	7/148	655,2263,2778,10018,27077,57728,79977	BMP7,FGFR2,GNAS,BCL2L11,B9D1,WDR19,GRHL2
8_Member	GO Biological Processes	GO:0061458	reproductive system development	-2.05104	-0.40677	14/435	329,472,596,655,2263,2885,5747,6382,10018,10388,10733,22836,57728,79977	BIRC2,ATM,BCL2,BMP7,FGFR2,GRB2,PTK2,SDC1,BCL2L11,SYCP2,PLK4,RHOBTB3,WDR19,GRHL2
8_Member	GO Biological Processes	GO:0016331	morphogenesis of embryonic epithelium	-2.02797	-0.389683	7/150	655,2263,4522,5979,11146,79977,115908	BMP7,FGFR2,MTHFD1,RET,GLMN,GRHL2,CTHRC1
8_Member	GO Biological Processes	GO:0001890	placenta development	-1.98356	-0.359321	7/153	329,655,2263,2885,5747,10733,79977	BIRC2,BMP7,FGFR2,GRB2,PTK2,PLK4,GRHL2
8_Member	GO Biological Processes	GO:0001892	embryonic placenta development	-1.91038	-0.318332	5/88	655,2263,2885,10733,79977	BMP7,FGFR2,GRB2,PLK4,GRHL2
8_Member	GO Biological Processes	GO:0021915	neural tube development	-1.88453	-0.295672	7/160	655,4522,11146,26227,57728,79977,115908	BMP7,MTHFD1,GLMN,PHGDH,WDR19,GRHL2,CTHRC1
8_Member	GO Biological Processes	GO:0048705	skeletal system morphogenesis	-1.88033	-0.293924	9/239	655,2263,2778,4088,4147,4522,51741,57728,79977	BMP7,FGFR2,GNAS,SMAD3,MATN2,MTHFD1,WWOX,WDR19,GRHL2
8_Member	GO Biological Processes	GO:0001838	embryonic epithelial tube formation	-1.87564	-0.293018	6/124	655,4522,5979,11146,79977,115908	BMP7,MTHFD1,RET,GLMN,GRHL2,CTHRC1
8_Member	GO Biological Processes	GO:0030326	embryonic limb morphogenesis	-1.85983	-0.281469	6/125	655,2778,10018,27077,57728,79977	BMP7,GNAS,BCL2L11,B9D1,WDR19,GRHL2
8_Member	GO Biological Processes	GO:0035113	embryonic appendage morphogenesis	-1.85983	-0.281469	6/125	655,2778,10018,27077,57728,79977	BMP7,GNAS,BCL2L11,B9D1,WDR19,GRHL2
8_Member	GO Biological Processes	GO:0014020	primary neural tube formation	-1.74301	-0.198529	5/97	655,4522,11146,79977,115908	BMP7,MTHFD1,GLMN,GRHL2,CTHRC1
8_Member	GO Biological Processes	GO:0048729	tissue morphogenesis	-1.70486	-0.177551	18/674	596,655,760,1289,2263,2885,3488,4088,4147,4192,4522,5695,5710,5979,9948,11146,79977,115908	BCL2,BMP7,CA2,COL5A1,FGFR2,GRB2,IGFBP5,SMAD3,MATN2,MDK,MTHFD1,PSMB7,PSMD4,RET,WDR1,GLMN,GRHL2,CTHRC1
8_Member	GO Biological Processes	GO:0003006	developmental process involved in reproduction	-1.6878	-0.164834	18/677	329,472,596,655,2263,2885,4192,5747,6382,6790,9702,10018,10388,10658,10733,22836,57728,79977	BIRC2,ATM,BCL2,BMP7,FGFR2,GRB2,MDK,PTK2,SDC1,AURKA,CEP57,BCL2L11,SYCP2,CELF1,PLK4,RHOBTB3,WDR19,GRHL2
8_Member	GO Biological Processes	GO:0048736	appendage development	-1.6444	-0.135954	7/179	655,2263,2778,10018,27077,57728,79977	BMP7,FGFR2,GNAS,BCL2L11,B9D1,WDR19,GRHL2
8_Member	GO Biological Processes	GO:0060173	limb development	-1.6444	-0.135954	7/179	655,2263,2778,10018,27077,57728,79977	BMP7,FGFR2,GNAS,BCL2L11,B9D1,WDR19,GRHL2
8_Member	GO Biological Processes	GO:0001841	neural tube formation	-1.61062	-0.110875	5/105	655,4522,11146,79977,115908	BMP7,MTHFD1,GLMN,GRHL2,CTHRC1
8_Member	GO Biological Processes	GO:0060562	epithelial tube morphogenesis	-1.5135	-0.0485241	10/322	596,655,2263,4088,4192,4522,5979,11146,79977,115908	BCL2,BMP7,FGFR2,SMAD3,MDK,MTHFD1,RET,GLMN,GRHL2,CTHRC1
8_Member	GO Biological Processes	GO:0010463	mesenchymal cell proliferation	-1.50614	-0.0450885	3/44	655,2263,9678	BMP7,FGFR2,PHF14
8_Member	GO Biological Processes	GO:0048598	embryonic morphogenesis	-1.36641	0	15/586	655,1289,2263,2778,2885,4088,4522,5979,10018,11146,25949,27077,57728,79977,115908	BMP7,COL5A1,FGFR2,GNAS,GRB2,SMAD3,MTHFD1,RET,BCL2L11,GLMN,SYF2,B9D1,WDR19,GRHL2,CTHRC1
9_Summary	GO Biological Processes	GO:0000226	microtubule cytoskeleton organization	-4.05674	-1.66235	22/564	332,4085,5747,6047,6790,8086,9493,9702,10381,10615,10733,10783,10806,11004,25897,29911,50861,51203,55521,84942,344148,348654,9787,57728,80208	BIRC5,MAD2L1,PTK2,RNF4,AURKA,AAAS,KIF23,CEP57,TUBB3,SPAG5,PLK4,NEK6,SDCCAG8,KIF2C,RNF19A,HOOK2,STMN3,NUSAP1,TRIM36,WDR73,NCKAP5,GEN1,DLGAP5,WDR19,SPG11
9_Member	GO Biological Processes	GO:0000226	microtubule cytoskeleton organization	-4.05674	-1.66235	22/564	332,4085,5747,6047,6790,8086,9493,9702,10381,10615,10733,10783,10806,11004,25897,29911,50861,51203,55521,84942,344148,348654	BIRC5,MAD2L1,PTK2,RNF4,AURKA,AAAS,KIF23,CEP57,TUBB3,SPAG5,PLK4,NEK6,SDCCAG8,KIF2C,RNF19A,HOOK2,STMN3,NUSAP1,TRIM36,WDR73,NCKAP5,GEN1
9_Member	GO Biological Processes	GO:0007017	microtubule-based process	-3.35247	-1.18939	25/764	332,4085,5747,6047,6790,8086,9493,9702,9787,10381,10615,10733,10783,10806,11004,25897,29911,50861,51203,55521,57728,80208,84942,344148,348654	BIRC5,MAD2L1,PTK2,RNF4,AURKA,AAAS,KIF23,CEP57,DLGAP5,TUBB3,SPAG5,PLK4,NEK6,SDCCAG8,KIF2C,RNF19A,HOOK2,STMN3,NUSAP1,TRIM36,WDR19,SPG11,WDR73,NCKAP5,GEN1
9_Member	GO Biological Processes	GO:0051225	spindle assembly	-2.45243	-0.644341	7/125	332,6047,6790,8086,9493,10615,10783	BIRC5,RNF4,AURKA,AAAS,KIF23,SPAG5,NEK6
9_Member	GO Biological Processes	GO:0007051	spindle organization	-2.02976	-0.389683	8/187	332,6047,6790,8086,9493,10615,10783,55521	BIRC5,RNF4,AURKA,AAAS,KIF23,SPAG5,NEK6,TRIM36
9_Member	GO Biological Processes	GO:1902850	microtubule cytoskeleton organization involved in mitosis	-1.725	-0.189068	6/134	332,4085,6790,8086,9493,51203	BIRC5,MAD2L1,AURKA,AAAS,KIF23,NUSAP1
9_Member	GO Biological Processes	GO:0070507	regulation of microtubule cytoskeleton organization	-1.56516	-0.0824978	7/186	6047,6790,10615,10733,50861,55521,348654	RNF4,AURKA,SPAG5,PLK4,STMN3,TRIM36,GEN1
10_Summary	GO Biological Processes	GO:0007143	female meiotic nuclear division	-3.95974	-1.58524	5/31	472,5889,6790,7153,10388,25788,348654,596,4192,23236	ATM,RAD51C,AURKA,TOP2A,SYCP2,RAD54B,GEN1,BCL2,MDK,PLCB1
10_Member	GO Biological Processes	GO:0007143	female meiotic nuclear division	-3.95974	-1.58524	5/31	472,5889,6790,7153,10388	ATM,RAD51C,AURKA,TOP2A,SYCP2
10_Member	GO Biological Processes	GO:0006312	mitotic recombination	-2.33161	-0.570371	3/22	5889,25788,348654	RAD51C,RAD54B,GEN1
10_Member	GO Biological Processes	GO:0007292	female gamete generation	-2.25268	-0.530093	7/136	472,596,4192,5889,6790,7153,10388	ATM,BCL2,MDK,RAD51C,AURKA,TOP2A,SYCP2
10_Member	GO Biological Processes	GO:0007127	meiosis I	-2.04379	-0.400724	6/114	472,5889,6790,7153,10388,25788	ATM,RAD51C,AURKA,TOP2A,SYCP2,RAD54B
10_Member	GO Biological Processes	GO:0007131	reciprocal meiotic recombination	-2.02819	-0.389683	4/53	472,5889,7153,25788	ATM,RAD51C,TOP2A,RAD54B
10_Member	GO Biological Processes	GO:0035825	homologous recombination	-2.00003	-0.369991	4/54	472,5889,7153,25788	ATM,RAD51C,TOP2A,RAD54B
10_Member	GO Biological Processes	GO:0061982	meiosis I cell cycle process	-1.95734	-0.34109	6/119	472,5889,6790,7153,10388,25788	ATM,RAD51C,AURKA,TOP2A,SYCP2,RAD54B
10_Member	GO Biological Processes	GO:0140013	meiotic nuclear division	-1.72837	-0.189068	7/172	472,5889,6790,7153,10388,23236,25788	ATM,RAD51C,AURKA,TOP2A,SYCP2,PLCB1,RAD54B
10_Member	GO Biological Processes	GO:1903046	meiotic cell cycle process	-1.54334	-0.0694889	7/188	472,5889,6790,7153,10388,23236,25788	ATM,RAD51C,AURKA,TOP2A,SYCP2,PLCB1,RAD54B
10_Member	GO Biological Processes	GO:0007140	male meiotic nuclear division	-1.40982	0	3/48	472,5889,10388	ATM,RAD51C,SYCP2
11_Summary	GO Biological Processes	GO:0019083	viral transcription	-3.95019	-1.58212	11/177	4736,4927,6122,6144,6152,6229,7311,8086,9045,11097,64710,26986,472,863,3146,3939,4967,5209,5695,5710,9238,27044,30833,7263,26156,65003,1964,4690,5174,9270,117177,596,4301,10018,4088,4285,6950,9520,23203,23514,27092,51520,5780,8650,10268,29993,55690,57728,260294	RPL10A,NUP88,RPL3,RPL21,RPL24,RPS24,UBA52,AAAS,RPL14,NUP42,NUCKS1,PABPC1,ATM,CBFA2T3,HMGB1,LDHA,OGDH,PFKFB3,PSMB7,PSMD4,TBRG4,SND1,NT5C,TST,RSL1D1,MRPL11,EIF1AX,NCK1,PDZK1,ITGB1BP1,RAB3IP,BCL2,AFDN,BCL2L11,SMAD3,MIPEP,TCP1,NPEPPS,PMPCA,SPIDR,CACNG4,LARS1,PTPN9,NUMB,RAMP3,PACSIN1,PACS1,WDR19,NSUN5P2
11_Member	GO Biological Processes	GO:0019083	viral transcription	-3.95019	-1.58212	11/177	4736,4927,6122,6144,6152,6229,7311,8086,9045,11097,64710	RPL10A,NUP88,RPL3,RPL21,RPL24,RPS24,UBA52,AAAS,RPL14,NUP42,NUCKS1
11_Member	GO Biological Processes	GO:0019080	viral gene expression	-3.66014	-1.39406	11/191	4736,4927,6122,6144,6152,6229,7311,8086,9045,11097,64710	RPL10A,NUP88,RPL3,RPL21,RPL24,RPS24,UBA52,AAAS,RPL14,NUP42,NUCKS1
11_Member	GO Biological Processes	GO:0000184	nuclear-transcribed mRNA catabolic process, nonsense-mediated decay	-3.22051	-1.09911	8/120	4736,6122,6144,6152,6229,7311,9045,26986	RPL10A,RPL3,RPL21,RPL24,RPS24,UBA52,RPL14,PABPC1
11_Member	GO Biological Processes	GO:0034655	nucleobase-containing compound catabolic process	-3.18795	-1.07374	22/652	472,863,3146,3939,4736,4927,4967,5209,5695,5710,6122,6144,6152,6229,7311,8086,9045,9238,11097,26986,27044,30833	ATM,CBFA2T3,HMGB1,LDHA,RPL10A,NUP88,OGDH,PFKFB3,PSMB7,PSMD4,RPL3,RPL21,RPL24,RPS24,UBA52,AAAS,RPL14,TBRG4,NUP42,PABPC1,SND1,NT5C
11_Member	GO Biological Processes	GO:0044270	cellular nitrogen compound catabolic process	-3.10153	-1.04083	23/706	472,863,3146,3939,4736,4927,4967,5209,5695,5710,6122,6144,6152,6229,7263,7311,8086,9045,9238,11097,26986,27044,30833	ATM,CBFA2T3,HMGB1,LDHA,RPL10A,NUP88,OGDH,PFKFB3,PSMB7,PSMD4,RPL3,RPL21,RPL24,RPS24,TST,UBA52,AAAS,RPL14,TBRG4,NUP42,PABPC1,SND1,NT5C
11_Member	GO Biological Processes	GO:0042273	ribosomal large subunit biogenesis	-3.07218	-1.03297	6/71	4736,6122,6152,9045,26156,65003	RPL10A,RPL3,RPL24,RPL14,RSL1D1,MRPL11
11_Member	GO Biological Processes	GO:0006413	translational initiation	-3.02145	-0.996001	10/193	1964,4690,4736,6122,6144,6152,6229,7311,9045,26986	EIF1AX,NCK1,RPL10A,RPL3,RPL21,RPL24,RPS24,UBA52,RPL14,PABPC1
11_Member	GO Biological Processes	GO:0006614	SRP-dependent cotranslational protein targeting to membrane	-2.88236	-0.893971	7/105	4736,6122,6144,6152,6229,7311,9045	RPL10A,RPL3,RPL21,RPL24,RPS24,UBA52,RPL14
11_Member	GO Biological Processes	GO:0006612	protein targeting to membrane	-2.87215	-0.886415	10/202	4736,5174,6122,6144,6152,6229,7311,9045,9270,117177	RPL10A,PDZK1,RPL3,RPL21,RPL24,RPS24,UBA52,RPL14,ITGB1BP1,RAB3IP
11_Member	GO Biological Processes	GO:0006613	cotranslational protein targeting to membrane	-2.78834	-0.843406	7/109	4736,6122,6144,6152,6229,7311,9045	RPL10A,RPL3,RPL21,RPL24,RPS24,UBA52,RPL14
11_Member	GO Biological Processes	GO:0046700	heterocycle catabolic process	-2.75474	-0.823676	22/705	472,863,3146,3939,4736,4927,4967,5209,5695,5710,6122,6144,6152,6229,7311,8086,9045,9238,11097,26986,27044,30833	ATM,CBFA2T3,HMGB1,LDHA,RPL10A,NUP88,OGDH,PFKFB3,PSMB7,PSMD4,RPL3,RPL21,RPL24,RPS24,UBA52,AAAS,RPL14,TBRG4,NUP42,PABPC1,SND1,NT5C
11_Member	GO Biological Processes	GO:0019439	aromatic compound catabolic process	-2.66463	-0.769406	22/717	472,863,3146,3939,4736,4927,4967,5209,5695,5710,6122,6144,6152,6229,7311,8086,9045,9238,11097,26986,27044,30833	ATM,CBFA2T3,HMGB1,LDHA,RPL10A,NUP88,OGDH,PFKFB3,PSMB7,PSMD4,RPL3,RPL21,RPL24,RPS24,UBA52,AAAS,RPL14,TBRG4,NUP42,PABPC1,SND1,NT5C
11_Member	GO Biological Processes	GO:0090150	establishment of protein localization to membrane	-2.61376	-0.740722	13/334	596,4301,4736,5174,6122,6144,6152,6229,7311,9045,9270,10018,117177	BCL2,AFDN,RPL10A,PDZK1,RPL3,RPL21,RPL24,RPS24,UBA52,RPL14,ITGB1BP1,BCL2L11,RAB3IP
11_Member	GO Biological Processes	GO:0045047	protein targeting to ER	-2.59209	-0.735934	7/118	4736,6122,6144,6152,6229,7311,9045	RPL10A,RPL3,RPL21,RPL24,RPS24,UBA52,RPL14
11_Member	GO Biological Processes	GO:0072594	establishment of protein localization to organelle	-2.57322	-0.726929	18/549	596,4088,4285,4736,4927,6122,6144,6152,6229,6950,7311,9045,9520,10018,23203,23514,27092,51520	BCL2,SMAD3,MIPEP,RPL10A,NUP88,RPL3,RPL21,RPL24,RPS24,TCP1,UBA52,RPL14,NPEPPS,BCL2L11,PMPCA,SPIDR,CACNG4,LARS1
11_Member	GO Biological Processes	GO:0072599	establishment of protein localization to endoplasmic reticulum	-2.511	-0.686995	7/122	4736,6122,6144,6152,6229,7311,9045	RPL10A,RPL3,RPL21,RPL24,RPS24,UBA52,RPL14
11_Member	GO Biological Processes	GO:1901361	organic cyclic compound catabolic process	-2.39685	-0.603889	22/755	472,863,3146,3939,4736,4927,4967,5209,5695,5710,6122,6144,6152,6229,7311,8086,9045,9238,11097,26986,27044,30833	ATM,CBFA2T3,HMGB1,LDHA,RPL10A,NUP88,OGDH,PFKFB3,PSMB7,PSMD4,RPL3,RPL21,RPL24,RPS24,UBA52,AAAS,RPL14,TBRG4,NUP42,PABPC1,SND1,NT5C
11_Member	GO Biological Processes	GO:0072657	protein localization to membrane	-2.34536	-0.574532	19/623	596,4301,4736,5174,5780,6122,6144,6152,6229,7311,8650,9045,9270,10018,10268,29993,55690,57728,117177	BCL2,AFDN,RPL10A,PDZK1,PTPN9,RPL3,RPL21,RPL24,RPS24,UBA52,NUMB,RPL14,ITGB1BP1,BCL2L11,RAMP3,PACSIN1,PACS1,WDR19,RAB3IP
11_Member	GO Biological Processes	GO:0000956	nuclear-transcribed mRNA catabolic process	-2.23986	-0.52642	9/209	472,4736,6122,6144,6152,6229,7311,9045,26986	ATM,RPL10A,RPL3,RPL21,RPL24,RPS24,UBA52,RPL14,PABPC1
11_Member	GO Biological Processes	GO:0006605	protein targeting	-2.07579	-0.422057	14/432	4285,4736,5174,6122,6144,6152,6229,7311,9045,9270,9520,23203,51520,117177	MIPEP,RPL10A,PDZK1,RPL3,RPL21,RPL24,RPS24,UBA52,RPL14,ITGB1BP1,NPEPPS,PMPCA,LARS1,RAB3IP
11_Member	GO Biological Processes	GO:0070972	protein localization to endoplasmic reticulum	-2.07363	-0.422057	7/147	4736,6122,6144,6152,6229,7311,9045	RPL10A,RPL3,RPL21,RPL24,RPS24,UBA52,RPL14
11_Member	GO Biological Processes	GO:0006401	RNA catabolic process	-1.97329	-0.350209	13/400	472,4736,5695,5710,6122,6144,6152,6229,7311,9045,9238,26986,27044	ATM,RPL10A,PSMB7,PSMD4,RPL3,RPL21,RPL24,RPS24,UBA52,RPL14,TBRG4,PABPC1,SND1
11_Member	GO Biological Processes	GO:0000027	ribosomal large subunit assembly	-1.95049	-0.33762	3/30	6122,6152,65003	RPL3,RPL24,MRPL11
11_Member	GO Biological Processes	GO:0006402	mRNA catabolic process	-1.87879	-0.293924	12/367	472,4736,5695,5710,6122,6144,6152,6229,7311,9045,9238,26986	ATM,RPL10A,PSMB7,PSMD4,RPL3,RPL21,RPL24,RPS24,UBA52,RPL14,TBRG4,PABPC1
11_Member	GO Biological Processes	GO:0042254	ribosome biogenesis	-1.352	0	9/297	4736,4927,6122,6152,6229,9045,26156,65003,260294	RPL10A,NUP88,RPL3,RPL24,RPS24,RPL14,RSL1D1,MRPL11,NSUN5P2
12_Summary	GO Biological Processes	GO:0006511	ubiquitin-dependent protein catabolic process	-3.86137	-1.52194	23/623	329,863,4085,5695,5710,5747,6047,6790,7311,8078,9709,9736,9960,10040,11124,11146,23326,25897,25906,26234,64777,80279,91544,1514,27131,472,3146,5209,10018,26986,4088	BIRC2,CBFA2T3,MAD2L1,PSMB7,PSMD4,PTK2,RNF4,AURKA,UBA52,USP5,HERPUD1,USP34,USP3,TOM1L1,FAF1,GLMN,USP22,RNF19A,ANAPC15,FBXL5,RMND5B,CDK5RAP3,UBXN11,CTSL,SNX5,ATM,HMGB1,PFKFB3,BCL2L11,PABPC1,SMAD3
12_Member	GO Biological Processes	GO:0006511	ubiquitin-dependent protein catabolic process	-3.86137	-1.52194	23/623	329,863,4085,5695,5710,5747,6047,6790,7311,8078,9709,9736,9960,10040,11124,11146,23326,25897,25906,26234,64777,80279,91544	BIRC2,CBFA2T3,MAD2L1,PSMB7,PSMD4,PTK2,RNF4,AURKA,UBA52,USP5,HERPUD1,USP34,USP3,TOM1L1,FAF1,GLMN,USP22,RNF19A,ANAPC15,FBXL5,RMND5B,CDK5RAP3,UBXN11
12_Member	GO Biological Processes	GO:0019941	modification-dependent protein catabolic process	-3.80085	-1.48685	23/629	329,863,4085,5695,5710,5747,6047,6790,7311,8078,9709,9736,9960,10040,11124,11146,23326,25897,25906,26234,64777,80279,91544	BIRC2,CBFA2T3,MAD2L1,PSMB7,PSMD4,PTK2,RNF4,AURKA,UBA52,USP5,HERPUD1,USP34,USP3,TOM1L1,FAF1,GLMN,USP22,RNF19A,ANAPC15,FBXL5,RMND5B,CDK5RAP3,UBXN11
12_Member	GO Biological Processes	GO:0043632	modification-dependent macromolecule catabolic process	-3.69232	-1.41082	23/640	329,863,4085,5695,5710,5747,6047,6790,7311,8078,9709,9736,9960,10040,11124,11146,23326,25897,25906,26234,64777,80279,91544	BIRC2,CBFA2T3,MAD2L1,PSMB7,PSMD4,PTK2,RNF4,AURKA,UBA52,USP5,HERPUD1,USP34,USP3,TOM1L1,FAF1,GLMN,USP22,RNF19A,ANAPC15,FBXL5,RMND5B,CDK5RAP3,UBXN11
12_Member	GO Biological Processes	GO:0043161	proteasome-mediated ubiquitin-dependent protein catabolic process	-3.44297	-1.25942	17/420	329,863,4085,5695,5710,6047,6790,7311,8078,9709,11124,11146,25897,25906,26234,64777,91544	BIRC2,CBFA2T3,MAD2L1,PSMB7,PSMD4,RNF4,AURKA,UBA52,USP5,HERPUD1,FAF1,GLMN,RNF19A,ANAPC15,FBXL5,RMND5B,UBXN11
12_Member	GO Biological Processes	GO:1903364	positive regulation of cellular protein catabolic process	-3.41672	-1.23734	9/141	863,5747,6790,8078,9709,11124,25897,26234,80279	CBFA2T3,PTK2,AURKA,USP5,HERPUD1,FAF1,RNF19A,FBXL5,CDK5RAP3
12_Member	GO Biological Processes	GO:0051603	proteolysis involved in cellular protein catabolic process	-3.37017	-1.20302	24/718	329,863,1514,4085,5695,5710,5747,6047,6790,7311,8078,9709,9736,9960,10040,11124,11146,23326,25897,25906,26234,64777,80279,91544	BIRC2,CBFA2T3,CTSL,MAD2L1,PSMB7,PSMD4,PTK2,RNF4,AURKA,UBA52,USP5,HERPUD1,USP34,USP3,TOM1L1,FAF1,GLMN,USP22,RNF19A,ANAPC15,FBXL5,RMND5B,CDK5RAP3,UBXN11
12_Member	GO Biological Processes	GO:0044257	cellular protein catabolic process	-3.27873	-1.14111	25/773	329,863,1514,4085,5695,5710,5747,6047,6790,7311,8078,9709,9736,9960,10040,11124,11146,23326,25897,25906,26234,27131,64777,80279,91544	BIRC2,CBFA2T3,CTSL,MAD2L1,PSMB7,PSMD4,PTK2,RNF4,AURKA,UBA52,USP5,HERPUD1,USP34,USP3,TOM1L1,FAF1,GLMN,USP22,RNF19A,ANAPC15,FBXL5,SNX5,RMND5B,CDK5RAP3,UBXN11
12_Member	GO Biological Processes	GO:2000060	positive regulation of ubiquitin-dependent protein catabolic process	-3.08478	-1.03872	7/97	863,5747,6790,8078,9709,25897,80279	CBFA2T3,PTK2,AURKA,USP5,HERPUD1,RNF19A,CDK5RAP3
12_Member	GO Biological Processes	GO:0010498	proteasomal protein catabolic process	-2.83358	-0.865952	17/477	329,863,4085,5695,5710,6047,6790,7311,8078,9709,11124,11146,25897,25906,26234,64777,91544	BIRC2,CBFA2T3,MAD2L1,PSMB7,PSMD4,RNF4,AURKA,UBA52,USP5,HERPUD1,FAF1,GLMN,RNF19A,ANAPC15,FBXL5,RMND5B,UBXN11
12_Member	GO Biological Processes	GO:0031331	positive regulation of cellular catabolic process	-2.74789	-0.821467	14/362	472,863,3146,5209,5747,6790,8078,9709,10018,11124,25897,26234,26986,80279	ATM,CBFA2T3,HMGB1,PFKFB3,PTK2,AURKA,USP5,HERPUD1,BCL2L11,FAF1,RNF19A,FBXL5,PABPC1,CDK5RAP3
12_Member	GO Biological Processes	GO:2000058	regulation of ubiquitin-dependent protein catabolic process	-2.5808	-0.730468	8/151	863,5747,6790,8078,9709,11146,25897,80279	CBFA2T3,PTK2,AURKA,USP5,HERPUD1,GLMN,RNF19A,CDK5RAP3
12_Member	GO Biological Processes	GO:1903052	positive regulation of proteolysis involved in cellular protein catabolic process	-2.53094	-0.697717	7/121	863,5747,6790,8078,9709,25897,80279	CBFA2T3,PTK2,AURKA,USP5,HERPUD1,RNF19A,CDK5RAP3
12_Member	GO Biological Processes	GO:1903362	regulation of cellular protein catabolic process	-2.24599	-0.530093	10/247	863,5747,6790,8078,9709,11124,11146,25897,26234,80279	CBFA2T3,PTK2,AURKA,USP5,HERPUD1,FAF1,GLMN,RNF19A,FBXL5,CDK5RAP3
12_Member	GO Biological Processes	GO:0045732	positive regulation of protein catabolic process	-2.16204	-0.46932	9/215	863,5747,6790,8078,9709,11124,25897,26234,80279	CBFA2T3,PTK2,AURKA,USP5,HERPUD1,FAF1,RNF19A,FBXL5,CDK5RAP3
12_Member	GO Biological Processes	GO:0009896	positive regulation of catabolic process	-2.14325	-0.457221	14/424	472,863,3146,5209,5747,6790,8078,9709,10018,11124,25897,26234,26986,80279	ATM,CBFA2T3,HMGB1,PFKFB3,PTK2,AURKA,USP5,HERPUD1,BCL2L11,FAF1,RNF19A,FBXL5,PABPC1,CDK5RAP3
12_Member	GO Biological Processes	GO:0032436	positive regulation of proteasomal ubiquitin-dependent protein catabolic process	-2.03483	-0.392958	5/82	863,6790,8078,9709,25897	CBFA2T3,AURKA,USP5,HERPUD1,RNF19A
12_Member	GO Biological Processes	GO:0032434	regulation of proteasomal ubiquitin-dependent protein catabolic process	-1.89161	-0.301698	6/123	863,6790,8078,9709,11146,25897	CBFA2T3,AURKA,USP5,HERPUD1,GLMN,RNF19A
12_Member	GO Biological Processes	GO:0042176	regulation of protein catabolic process	-1.76356	-0.214263	12/381	863,4085,4088,5747,6790,8078,9709,11124,11146,25897,26234,80279	CBFA2T3,MAD2L1,SMAD3,PTK2,AURKA,USP5,HERPUD1,FAF1,GLMN,RNF19A,FBXL5,CDK5RAP3
12_Member	GO Biological Processes	GO:1903050	regulation of proteolysis involved in cellular protein catabolic process	-1.69677	-0.17197	8/215	863,5747,6790,8078,9709,11146,25897,80279	CBFA2T3,PTK2,AURKA,USP5,HERPUD1,GLMN,RNF19A,CDK5RAP3
12_Member	GO Biological Processes	GO:1901800	positive regulation of proteasomal protein catabolic process	-1.62641	-0.121518	5/104	863,6790,8078,9709,25897	CBFA2T3,AURKA,USP5,HERPUD1,RNF19A
13_Summary	GO Biological Processes	GO:0032259	methylation	-3.64062	-1.38048	16/366	2653,2778,3720,7298,7799,10322,51111,63892,64754,79091,79977,94104,118881,221143,260294,387893,4927,7862,8086,11097,23326,51230	GCSH,GNAS,JARID2,TYMS,PRDM2,SMYD5,KMT5B,THADA,SMYD3,METTL22,GRHL2,PAXBP1,COMTD1,EEF1AKMT1,NSUN5P2,KMT5A,NUP88,BRPF1,AAAS,NUP42,USP22,PHF20
13_Member	GO Biological Processes	GO:0032259	methylation	-3.64062	-1.38048	16/366	2653,2778,3720,7298,7799,10322,51111,63892,64754,79091,79977,94104,118881,221143,260294,387893	GCSH,GNAS,JARID2,TYMS,PRDM2,SMYD5,KMT5B,THADA,SMYD3,METTL22,GRHL2,PAXBP1,COMTD1,EEF1AKMT1,NSUN5P2,KMT5A
13_Member	GO Biological Processes	GO:0043414	macromolecule methylation	-2.44559	-0.639465	12/309	2778,3720,7799,51111,63892,64754,79091,79977,94104,221143,260294,387893	GNAS,JARID2,PRDM2,KMT5B,THADA,SMYD3,METTL22,GRHL2,PAXBP1,EEF1AKMT1,NSUN5P2,KMT5A
13_Member	GO Biological Processes	GO:0018022	peptidyl-lysine methylation	-2.37717	-0.594898	7/129	3720,7799,51111,64754,79091,221143,387893	JARID2,PRDM2,KMT5B,SMYD3,METTL22,EEF1AKMT1,KMT5A
13_Member	GO Biological Processes	GO:0018205	peptidyl-lysine modification	-2.35915	-0.583258	14/400	2653,3720,4927,7799,7862,8086,11097,23326,51111,51230,64754,79091,221143,387893	GCSH,JARID2,NUP88,PRDM2,BRPF1,AAAS,NUP42,USP22,KMT5B,PHF20,SMYD3,METTL22,EEF1AKMT1,KMT5A
13_Member	GO Biological Processes	GO:0006479	protein methylation	-2.13861	-0.456548	8/179	3720,7799,51111,64754,79091,94104,221143,387893	JARID2,PRDM2,KMT5B,SMYD3,METTL22,PAXBP1,EEF1AKMT1,KMT5A
13_Member	GO Biological Processes	GO:0008213	protein alkylation	-2.13861	-0.456548	8/179	3720,7799,51111,64754,79091,94104,221143,387893	JARID2,PRDM2,KMT5B,SMYD3,METTL22,PAXBP1,EEF1AKMT1,KMT5A
13_Member	GO Biological Processes	GO:0016571	histone methylation	-1.65542	-0.142372	6/139	3720,7799,51111,64754,94104,387893	JARID2,PRDM2,KMT5B,SMYD3,PAXBP1,KMT5A
13_Member	GO Biological Processes	GO:0034968	histone lysine methylation	-1.4771	-0.0293391	5/114	3720,7799,51111,64754,387893	JARID2,PRDM2,KMT5B,SMYD3,KMT5A
14_Summary	GO Biological Processes	GO:0007045	cell-substrate adherens junction assembly	-3.5601	-1.34179	7/81	596,4088,5747,5796,7057,9270,79834,4301,8650,9948,10207,79977,472,655,1785,2885,3146,4192,4690,5979,6288,7045,11124,11146,57580,498,3488,10509,23587,2263,7311,8425,51741,10018,329,91942,3939,7153,51447,10268	BCL2,SMAD3,PTK2,PTPRK,THBS1,ITGB1BP1,PEAK1,AFDN,NUMB,WDR1,PATJ,GRHL2,ATM,BMP7,DNM2,GRB2,HMGB1,MDK,NCK1,RET,SAA1,TGFBI,FAF1,GLMN,PREX1,ATP5F1A,IGFBP5,SEMA4B,ELP5,FGFR2,UBA52,LTBP4,WWOX,BCL2L11,BIRC2,NDUFAF2,LDHA,TOP2A,IP6K2,RAMP3
14_Member	GO Biological Processes	GO:0007045	cell-substrate adherens junction assembly	-3.5601	-1.34179	7/81	596,4088,5747,5796,7057,9270,79834	BCL2,SMAD3,PTK2,PTPRK,THBS1,ITGB1BP1,PEAK1
14_Member	GO Biological Processes	GO:0048041	focal adhesion assembly	-3.5601	-1.34179	7/81	596,4088,5747,5796,7057,9270,79834	BCL2,SMAD3,PTK2,PTPRK,THBS1,ITGB1BP1,PEAK1
14_Member	GO Biological Processes	GO:0034332	adherens junction organization	-3.39419	-1.21891	9/142	596,4088,4301,5747,5796,7057,8650,9270,79834	BCL2,SMAD3,AFDN,PTK2,PTPRK,THBS1,NUMB,ITGB1BP1,PEAK1
14_Member	GO Biological Processes	GO:0034333	adherens junction assembly	-3.27985	-1.14111	7/90	596,4088,5747,5796,7057,9270,79834	BCL2,SMAD3,PTK2,PTPRK,THBS1,ITGB1BP1,PEAK1
14_Member	GO Biological Processes	GO:0007044	cell-substrate junction assembly	-3.08478	-1.03872	7/97	596,4088,5747,5796,7057,9270,79834	BCL2,SMAD3,PTK2,PTPRK,THBS1,ITGB1BP1,PEAK1
14_Member	GO Biological Processes	GO:0034329	cell junction assembly	-2.82107	-0.863526	11/241	596,4088,4301,5747,5796,7057,9270,9948,10207,79834,79977	BCL2,SMAD3,AFDN,PTK2,PTPRK,THBS1,ITGB1BP1,WDR1,PATJ,PEAK1,GRHL2
14_Member	GO Biological Processes	GO:0034330	cell junction organization	-2.65679	-0.766467	12/291	596,4088,4301,5747,5796,7057,8650,9270,9948,10207,79834,79977	BCL2,SMAD3,AFDN,PTK2,PTPRK,THBS1,NUMB,ITGB1BP1,WDR1,PATJ,PEAK1,GRHL2
14_Member	GO Biological Processes	GO:0051893	regulation of focal adhesion assembly	-2.61302	-0.740722	5/60	4088,5747,7057,9270,79834	SMAD3,PTK2,THBS1,ITGB1BP1,PEAK1
14_Member	GO Biological Processes	GO:0090109	regulation of cell-substrate junction assembly	-2.61302	-0.740722	5/60	4088,5747,7057,9270,79834	SMAD3,PTK2,THBS1,ITGB1BP1,PEAK1
14_Member	GO Biological Processes	GO:1903391	regulation of adherens junction organization	-2.4039	-0.606445	5/67	4088,5747,7057,9270,79834	SMAD3,PTK2,THBS1,ITGB1BP1,PEAK1
14_Member	GO Biological Processes	GO:0030155	regulation of cell adhesion	-2.1819	-0.479638	20/693	472,596,655,1785,2885,3146,4088,4192,4301,4690,5747,5979,6288,7045,7057,9270,11124,11146,57580,79834	ATM,BCL2,BMP7,DNM2,GRB2,HMGB1,SMAD3,MDK,AFDN,NCK1,PTK2,RET,SAA1,TGFBI,THBS1,ITGB1BP1,FAF1,GLMN,PREX1,PEAK1
14_Member	GO Biological Processes	GO:0010810	regulation of cell-substrate adhesion	-2.16204	-0.46932	9/215	596,1785,4088,4192,5747,7057,9270,57580,79834	BCL2,DNM2,SMAD3,MDK,PTK2,THBS1,ITGB1BP1,PREX1,PEAK1
14_Member	GO Biological Processes	GO:0001952	regulation of cell-matrix adhesion	-1.95734	-0.34109	6/119	596,4088,5747,7057,9270,79834	BCL2,SMAD3,PTK2,THBS1,ITGB1BP1,PEAK1
14_Member	GO Biological Processes	GO:0045785	positive regulation of cell adhesion	-1.94834	-0.336592	13/403	472,655,1785,2885,3146,4088,4192,4301,4690,5979,6288,9270,57580	ATM,BMP7,DNM2,GRB2,HMGB1,SMAD3,MDK,AFDN,NCK1,RET,SAA1,ITGB1BP1,PREX1
14_Member	GO Biological Processes	GO:0030335	positive regulation of cell migration	-1.91799	-0.318332	16/544	472,498,596,655,3146,3488,4088,4192,5747,5979,7057,8650,9270,10509,23587,57580	ATM,ATP5F1A,BCL2,BMP7,HMGB1,IGFBP5,SMAD3,MDK,PTK2,RET,THBS1,NUMB,ITGB1BP1,SEMA4B,ELP5,PREX1
14_Member	GO Biological Processes	GO:1901888	regulation of cell junction assembly	-1.91038	-0.318332	5/88	4088,5747,7057,9270,79834	SMAD3,PTK2,THBS1,ITGB1BP1,PEAK1
14_Member	GO Biological Processes	GO:2000147	positive regulation of cell motility	-1.75823	-0.21087	16/568	472,498,596,655,3146,3488,4088,4192,5747,5979,7057,8650,9270,10509,23587,57580	ATM,ATP5F1A,BCL2,BMP7,HMGB1,IGFBP5,SMAD3,MDK,PTK2,RET,THBS1,NUMB,ITGB1BP1,SEMA4B,ELP5,PREX1
14_Member	GO Biological Processes	GO:0071560	cellular response to transforming growth factor beta stimulus	-1.74508	-0.199641	9/252	1785,2263,4088,5747,5796,7057,7311,8425,51741	DNM2,FGFR2,SMAD3,PTK2,PTPRK,THBS1,UBA52,LTBP4,WWOX
14_Member	GO Biological Processes	GO:0071559	response to transforming growth factor beta	-1.68628	-0.164223	9/258	1785,2263,4088,5747,5796,7057,7311,8425,51741	DNM2,FGFR2,SMAD3,PTK2,PTPRK,THBS1,UBA52,LTBP4,WWOX
14_Member	GO Biological Processes	GO:0051272	positive regulation of cellular component movement	-1.65266	-0.140499	16/585	472,498,596,655,3146,3488,4088,4192,5747,5979,7057,8650,9270,10509,23587,57580	ATM,ATP5F1A,BCL2,BMP7,HMGB1,IGFBP5,SMAD3,MDK,PTK2,RET,THBS1,NUMB,ITGB1BP1,SEMA4B,ELP5,PREX1
14_Member	GO Biological Processes	GO:0031589	cell-substrate adhesion	-1.60373	-0.10602	11/356	596,1785,4088,4192,5747,5796,7057,9270,10018,57580,79834	BCL2,DNM2,SMAD3,MDK,PTK2,PTPRK,THBS1,ITGB1BP1,BCL2L11,PREX1,PEAK1
14_Member	GO Biological Processes	GO:0007160	cell-matrix adhesion	-1.58332	-0.0931114	8/226	596,4088,5747,5796,7057,9270,10018,79834	BCL2,SMAD3,PTK2,PTPRK,THBS1,ITGB1BP1,BCL2L11,PEAK1
14_Member	GO Biological Processes	GO:0040017	positive regulation of locomotion	-1.57589	-0.0888192	16/598	472,498,596,655,3146,3488,4088,4192,5747,5979,7057,8650,9270,10509,23587,57580	ATM,ATP5F1A,BCL2,BMP7,HMGB1,IGFBP5,SMAD3,MDK,PTK2,RET,THBS1,NUMB,ITGB1BP1,SEMA4B,ELP5,PREX1
14_Member	GO Biological Processes	GO:2000377	regulation of reactive oxygen species metabolic process	-1.46965	-0.0241878	7/195	329,596,655,1785,2885,4088,7057	BIRC2,BCL2,BMP7,DNM2,GRB2,SMAD3,THBS1
14_Member	GO Biological Processes	GO:0072593	reactive oxygen species metabolic process	-1.45494	-0.0161174	9/284	329,596,655,1785,2885,4088,7057,57580,91942	BIRC2,BCL2,BMP7,DNM2,GRB2,SMAD3,THBS1,PREX1,NDUFAF2
14_Member	GO Biological Processes	GO:0043065	positive regulation of apoptotic process	-1.44513	-0.00873218	17/672	472,596,655,1785,3146,3939,4088,4690,5979,7057,7153,7311,10018,11124,51447,51741,57580	ATM,BCL2,BMP7,DNM2,HMGB1,LDHA,SMAD3,NCK1,RET,THBS1,TOP2A,UBA52,BCL2L11,FAF1,IP6K2,WWOX,PREX1
14_Member	GO Biological Processes	GO:0010942	positive regulation of cell death	-1.41055	0	18/730	472,596,655,1785,3146,3939,4088,4690,5979,7057,7153,7311,10018,10268,11124,51447,51741,57580	ATM,BCL2,BMP7,DNM2,HMGB1,LDHA,SMAD3,NCK1,RET,THBS1,TOP2A,UBA52,BCL2L11,RAMP3,FAF1,IP6K2,WWOX,PREX1
14_Member	GO Biological Processes	GO:0043068	positive regulation of programmed cell death	-1.40465	0	17/680	472,596,655,1785,3146,3939,4088,4690,5979,7057,7153,7311,10018,11124,51447,51741,57580	ATM,BCL2,BMP7,DNM2,HMGB1,LDHA,SMAD3,NCK1,RET,THBS1,TOP2A,UBA52,BCL2L11,FAF1,IP6K2,WWOX,PREX1
14_Member	GO Biological Processes	GO:0007179	transforming growth factor beta receptor signaling pathway	-1.39992	0	7/202	1785,4088,5747,5796,7057,7311,8425	DNM2,SMAD3,PTK2,PTPRK,THBS1,UBA52,LTBP4
14_Member	GO Biological Processes	GO:0017015	regulation of transforming growth factor beta receptor signaling pathway	-1.38295	0	5/121	1785,4088,7057,7311,8425	DNM2,SMAD3,THBS1,UBA52,LTBP4
14_Member	GO Biological Processes	GO:1903844	regulation of cellular response to transforming growth factor beta stimulus	-1.35745	0	5/123	1785,4088,7057,7311,8425	DNM2,SMAD3,THBS1,UBA52,LTBP4
15_Summary	GO Biological Processes	GO:0035860	glial cell-derived neurotrophic factor receptor signaling pathway	-3.52951	-1.32893	3/9	2674,5979,55959	GFRA1,RET,SULF2
15_Member	GO Biological Processes	GO:0035860	glial cell-derived neurotrophic factor receptor signaling pathway	-3.52951	-1.32893	3/9	2674,5979,55959	GFRA1,RET,SULF2
16_Summary	GO Biological Processes	GO:1903431	positive regulation of cell maturation	-3.52951	-1.32893	3/9	596,5979,6790,472,2589,4690,8550,10268,10783,23012,51719,63967,64754,7862,51230,80279,387893,26156,51389,2263,5292,5747,10040,79834,51741,2885,3488,7298,7799,4192	BCL2,RET,AURKA,ATM,GALNT1,NCK1,MAPKAPK5,RAMP3,NEK6,STK38L,CAB39,CLSPN,SMYD3,BRPF1,PHF20,CDK5RAP3,KMT5A,RSL1D1,RWDD1,FGFR2,PIM1,PTK2,TOM1L1,PEAK1,WWOX,GRB2,IGFBP5,TYMS,PRDM2,MDK
16_Member	GO Biological Processes	GO:1903431	positive regulation of cell maturation	-3.52951	-1.32893	3/9	596,5979,6790	BCL2,RET,AURKA
16_Member	GO Biological Processes	GO:0018209	peptidyl-serine modification	-2.75215	-0.823419	13/322	472,596,2589,4690,5979,6790,8550,10268,10783,23012,51719,63967,64754	ATM,BCL2,GALNT1,NCK1,RET,AURKA,MAPKAPK5,RAMP3,NEK6,STK38L,CAB39,CLSPN,SMYD3
16_Member	GO Biological Processes	GO:0018105	peptidyl-serine phosphorylation	-2.56054	-0.719798	12/299	472,596,4690,5979,6790,8550,10268,10783,23012,51719,63967,64754	ATM,BCL2,NCK1,RET,AURKA,MAPKAPK5,RAMP3,NEK6,STK38L,CAB39,CLSPN,SMYD3
16_Member	GO Biological Processes	GO:1903429	regulation of cell maturation	-2.27592	-0.541261	3/23	596,5979,6790	BCL2,RET,AURKA
16_Member	GO Biological Processes	GO:1901796	regulation of signal transduction by p53 class mediator	-2.12463	-0.447303	8/180	472,596,6790,7862,8550,51230,80279,387893	ATM,BCL2,AURKA,BRPF1,MAPKAPK5,PHF20,CDK5RAP3,KMT5A
16_Member	GO Biological Processes	GO:0007569	cell aging	-2.00861	-0.372701	6/116	472,596,8550,10783,26156,51389	ATM,BCL2,MAPKAPK5,NEK6,RSL1D1,RWDD1
16_Member	GO Biological Processes	GO:0046777	protein autophosphorylation	-1.92425	-0.320127	9/235	472,2263,5292,5747,6790,8550,10040,10783,79834	ATM,FGFR2,PIM1,PTK2,AURKA,MAPKAPK5,TOM1L1,NEK6,PEAK1
16_Member	GO Biological Processes	GO:0072331	signal transduction by p53 class mediator	-1.59298	-0.0965568	9/268	472,596,6790,7862,8550,51230,51741,80279,387893	ATM,BCL2,AURKA,BRPF1,MAPKAPK5,PHF20,WWOX,CDK5RAP3,KMT5A
16_Member	GO Biological Processes	GO:0007568	aging	-1.5214	-0.0525705	10/321	472,596,2885,3488,7298,7799,8550,10783,26156,51389	ATM,BCL2,GRB2,IGFBP5,TYMS,PRDM2,MAPKAPK5,NEK6,RSL1D1,RWDD1
16_Member	GO Biological Processes	GO:0048599	oocyte development	-1.4567	-0.0165426	3/46	472,596,6790	ATM,BCL2,AURKA
16_Member	GO Biological Processes	GO:0009994	oocyte differentiation	-1.34383	0	3/51	472,596,6790	ATM,BCL2,AURKA
16_Member	GO Biological Processes	GO:0048477	oogenesis	-1.32437	0	4/87	472,596,4192,6790	ATM,BCL2,MDK,AURKA
17_Summary	GO Biological Processes	GO:0010257	NADH dehydrogenase complex assembly	-3.31362	-1.16612	6/64	617,4705,4723,4728,6901,91942,205,498,863,2778,3419,3939,4927,4967,5019,5209,8086,9238,11097,26227	BCS1L,NDUFA10,NDUFV1,NDUFS8,TAZ,NDUFAF2,AK4,ATP5F1A,CBFA2T3,GNAS,IDH3A,LDHA,NUP88,OGDH,OXCT1,PFKFB3,AAAS,TBRG4,NUP42,PHGDH
17_Member	GO Biological Processes	GO:0010257	NADH dehydrogenase complex assembly	-3.31362	-1.16612	6/64	617,4705,4723,4728,6901,91942	BCS1L,NDUFA10,NDUFV1,NDUFS8,TAZ,NDUFAF2
17_Member	GO Biological Processes	GO:0032981	mitochondrial respiratory chain complex I assembly	-3.31362	-1.16612	6/64	617,4705,4723,4728,6901,91942	BCS1L,NDUFA10,NDUFV1,NDUFS8,TAZ,NDUFAF2
17_Member	GO Biological Processes	GO:0006091	generation of precursor metabolites and energy	-3.17212	-1.07176	19/526	205,498,863,2778,3419,3939,4705,4723,4728,4927,4967,5019,5209,6901,8086,9238,11097,26227,91942	AK4,ATP5F1A,CBFA2T3,GNAS,IDH3A,LDHA,NDUFA10,NDUFV1,NDUFS8,NUP88,OGDH,OXCT1,PFKFB3,TAZ,AAAS,TBRG4,NUP42,PHGDH,NDUFAF2
17_Member	GO Biological Processes	GO:0045333	cellular respiration	-2.46413	-0.650943	9/193	863,3419,4705,4723,4728,4967,6901,9238,91942	CBFA2T3,IDH3A,NDUFA10,NDUFV1,NDUFS8,OGDH,TAZ,TBRG4,NDUFAF2
17_Member	GO Biological Processes	GO:0033108	mitochondrial respiratory chain complex assembly	-2.40196	-0.606221	6/96	617,4705,4723,4728,6901,91942	BCS1L,NDUFA10,NDUFV1,NDUFS8,TAZ,NDUFAF2
17_Member	GO Biological Processes	GO:0015980	energy derivation by oxidation of organic compounds	-1.83635	-0.264163	10/285	863,2778,3419,4705,4723,4728,4967,6901,9238,91942	CBFA2T3,GNAS,IDH3A,NDUFA10,NDUFV1,NDUFS8,OGDH,TAZ,TBRG4,NDUFAF2
17_Member	GO Biological Processes	GO:0006119	oxidative phosphorylation	-1.57645	-0.0888192	6/145	205,498,4705,4723,4728,6901	AK4,ATP5F1A,NDUFA10,NDUFV1,NDUFS8,TAZ
17_Member	GO Biological Processes	GO:0022904	respiratory electron transport chain	-1.43578	-0.00248904	5/117	4705,4723,4728,6901,91942	NDUFA10,NDUFV1,NDUFS8,TAZ,NDUFAF2
17_Member	GO Biological Processes	GO:0009060	aerobic respiration	-1.32437	0	4/87	863,3419,4728,4967	CBFA2T3,IDH3A,NDUFS8,OGDH
18_Summary	GO Biological Processes	GO:0000904	cell morphogenesis involved in differentiation	-3.14541	-1.04863	24/745	596,655,1523,1785,2263,2317,2674,2885,4147,4192,5747,5979,6152,8650,9270,9948,10381,10509,57580,79834,79977,80208,85451,285220,6790,8904,29993,51760,3146,4088,6288,7057	BCL2,BMP7,CUX1,DNM2,FGFR2,FLNB,GFRA1,GRB2,MATN2,MDK,PTK2,RET,RPL24,NUMB,ITGB1BP1,WDR1,TUBB3,SEMA4B,PREX1,PEAK1,GRHL2,SPG11,UNK,EPHA6,AURKA,CPNE1,PACSIN1,SYT17,HMGB1,SMAD3,SAA1,THBS1
18_Member	GO Biological Processes	GO:0000904	cell morphogenesis involved in differentiation	-3.14541	-1.04863	24/745	596,655,1523,1785,2263,2317,2674,2885,4147,4192,5747,5979,6152,8650,9270,9948,10381,10509,57580,79834,79977,80208,85451,285220	BCL2,BMP7,CUX1,DNM2,FGFR2,FLNB,GFRA1,GRB2,MATN2,MDK,PTK2,RET,RPL24,NUMB,ITGB1BP1,WDR1,TUBB3,SEMA4B,PREX1,PEAK1,GRHL2,SPG11,UNK,EPHA6
18_Member	GO Biological Processes	GO:0048858	cell projection morphogenesis	-2.70731	-0.803403	21/666	596,655,1523,1785,2263,2674,2885,4147,4192,5747,5979,6152,6790,8650,8904,10381,10509,29993,51760,80208,285220	BCL2,BMP7,CUX1,DNM2,FGFR2,GFRA1,GRB2,MATN2,MDK,PTK2,RET,RPL24,AURKA,NUMB,CPNE1,TUBB3,SEMA4B,PACSIN1,SYT17,SPG11,EPHA6
18_Member	GO Biological Processes	GO:0032990	cell part morphogenesis	-2.56321	-0.720568	21/685	596,655,1523,1785,2263,2674,2885,4147,4192,5747,5979,6152,6790,8650,8904,10381,10509,29993,51760,80208,285220	BCL2,BMP7,CUX1,DNM2,FGFR2,GFRA1,GRB2,MATN2,MDK,PTK2,RET,RPL24,AURKA,NUMB,CPNE1,TUBB3,SEMA4B,PACSIN1,SYT17,SPG11,EPHA6
18_Member	GO Biological Processes	GO:0048812	neuron projection morphogenesis	-2.49893	-0.678568	20/648	596,655,1523,1785,2263,2674,2885,4147,5747,5979,6152,6790,8650,8904,10381,10509,29993,51760,80208,285220	BCL2,BMP7,CUX1,DNM2,FGFR2,GFRA1,GRB2,MATN2,PTK2,RET,RPL24,AURKA,NUMB,CPNE1,TUBB3,SEMA4B,PACSIN1,SYT17,SPG11,EPHA6
18_Member	GO Biological Processes	GO:0120039	plasma membrane bounded cell projection morphogenesis	-2.39601	-0.603889	20/662	596,655,1523,1785,2263,2674,2885,4147,5747,5979,6152,6790,8650,8904,10381,10509,29993,51760,80208,285220	BCL2,BMP7,CUX1,DNM2,FGFR2,GFRA1,GRB2,MATN2,PTK2,RET,RPL24,AURKA,NUMB,CPNE1,TUBB3,SEMA4B,PACSIN1,SYT17,SPG11,EPHA6
18_Member	GO Biological Processes	GO:0007409	axonogenesis	-2.14521	-0.457848	15/468	596,655,1785,2263,2674,2885,4147,5747,5979,6152,8650,10381,10509,80208,285220	BCL2,BMP7,DNM2,FGFR2,GFRA1,GRB2,MATN2,PTK2,RET,RPL24,NUMB,TUBB3,SEMA4B,SPG11,EPHA6
18_Member	GO Biological Processes	GO:0048667	cell morphogenesis involved in neuron differentiation	-1.97194	-0.350005	17/583	596,655,1523,1785,2263,2674,2885,4147,5747,5979,6152,8650,10381,10509,80208,85451,285220	BCL2,BMP7,CUX1,DNM2,FGFR2,GFRA1,GRB2,MATN2,PTK2,RET,RPL24,NUMB,TUBB3,SEMA4B,SPG11,UNK,EPHA6
18_Member	GO Biological Processes	GO:0007411	axon guidance	-1.9254	-0.320127	10/276	655,2674,2885,4147,5747,5979,6152,10381,10509,285220	BMP7,GFRA1,GRB2,MATN2,PTK2,RET,RPL24,TUBB3,SEMA4B,EPHA6
18_Member	GO Biological Processes	GO:0097485	neuron projection guidance	-1.91528	-0.318332	10/277	655,2674,2885,4147,5747,5979,6152,10381,10509,285220	BMP7,GFRA1,GRB2,MATN2,PTK2,RET,RPL24,TUBB3,SEMA4B,EPHA6
18_Member	GO Biological Processes	GO:0061564	axon development	-1.80181	-0.236713	15/514	596,655,1785,2263,2674,2885,4147,5747,5979,6152,8650,10381,10509,80208,285220	BCL2,BMP7,DNM2,FGFR2,GFRA1,GRB2,MATN2,PTK2,RET,RPL24,NUMB,TUBB3,SEMA4B,SPG11,EPHA6
18_Member	GO Biological Processes	GO:0006935	chemotaxis	-1.32454	0	16/645	655,2674,2885,3146,4088,4147,4192,5747,5979,6152,6288,7057,10381,10509,57580,285220	BMP7,GFRA1,GRB2,HMGB1,SMAD3,MATN2,MDK,PTK2,RET,RPL24,SAA1,THBS1,TUBB3,SEMA4B,PREX1,EPHA6
18_Member	GO Biological Processes	GO:0042330	taxis	-1.31469	0	16/647	655,2674,2885,3146,4088,4147,4192,5747,5979,6152,6288,7057,10381,10509,57580,285220	BMP7,GFRA1,GRB2,HMGB1,SMAD3,MATN2,MDK,PTK2,RET,RPL24,SAA1,THBS1,TUBB3,SEMA4B,PREX1,EPHA6
19_Summary	GO Biological Processes	GO:0006554	lysine catabolic process	-3.12651	-1.0465	3/12	501,4967,85007,4522,26227,79094,2653,7263	ALDH7A1,OGDH,PHYKPL,MTHFD1,PHGDH,CHAC1,GCSH,TST
19_Member	GO Biological Processes	GO:0006554	lysine catabolic process	-3.12651	-1.0465	3/12	501,4967,85007	ALDH7A1,OGDH,PHYKPL
19_Member	GO Biological Processes	GO:0006553	lysine metabolic process	-3.0176	-0.996001	3/13	501,4967,85007	ALDH7A1,OGDH,PHYKPL
19_Member	GO Biological Processes	GO:0009066	aspartate family amino acid metabolic process	-2.81727	-0.86221	5/54	501,4522,4967,26227,85007	ALDH7A1,MTHFD1,OGDH,PHGDH,PHYKPL
19_Member	GO Biological Processes	GO:0009068	aspartate family amino acid catabolic process	-2.27592	-0.541261	3/23	501,4967,85007	ALDH7A1,OGDH,PHYKPL
19_Member	GO Biological Processes	GO:0042398	cellular modified amino acid biosynthetic process	-1.36528	0	3/50	501,4522,79094	ALDH7A1,MTHFD1,CHAC1
19_Member	GO Biological Processes	GO:0009063	cellular amino acid catabolic process	-1.33253	0	5/125	501,2653,4967,7263,85007	ALDH7A1,GCSH,OGDH,TST,PHYKPL
20_Summary	GO Biological Processes	GO:0009113	purine nucleobase biosynthetic process	-3.12651	-1.0465	3/12	353,4522,10606,7298,596,7390	APRT,MTHFD1,PAICS,TYMS,BCL2,UROS
20_Member	GO Biological Processes	GO:0009113	purine nucleobase biosynthetic process	-3.12651	-1.0465	3/12	353,4522,10606	APRT,MTHFD1,PAICS
20_Member	GO Biological Processes	GO:0046112	nucleobase biosynthetic process	-2.45222	-0.644341	3/20	353,4522,10606	APRT,MTHFD1,PAICS
20_Member	GO Biological Processes	GO:0009112	nucleobase metabolic process	-2.38779	-0.600513	4/42	353,4522,7298,10606	APRT,MTHFD1,TYMS,PAICS
20_Member	GO Biological Processes	GO:0006144	purine nucleobase metabolic process	-2.33161	-0.570371	3/22	353,4522,10606	APRT,MTHFD1,PAICS
20_Member	GO Biological Processes	GO:0042440	pigment metabolic process	-2.27029	-0.541007	5/72	353,596,4522,7390,10606	APRT,BCL2,MTHFD1,UROS,PAICS
20_Member	GO Biological Processes	GO:0046148	pigment biosynthetic process	-1.91921	-0.318332	4/57	353,4522,7390,10606	APRT,MTHFD1,UROS,PAICS

## Sheet: Annotation_up_isoforms
Input ID	Gene ID	Type	Tax ID	Homologene Gene ID	Homologene Gene Tax ID	GO:0034340 response to type I interferon	GO:0002478 antigen processing and present	GO:0044257 cellular protein catabolic pro	GO:0006914 autophagy	GO:0045088 regulation of innate immune re	GO:0062012 regulation of small molecule m	GO:0002274 myeloid leukocyte activation	GO:0001816 cytokine production	GO:0006695 cholesterol biosynthetic proce	GO:0035456 response to interferon-beta	GO:0016049 cell growth	GO:0052547 regulation of peptidase activi	GO:0007169 transmembrane receptor protein	GO:0043620 regulation of DNA-templated tr	GO:0060700 regulation of ribonuclease act	GO:1903827 regulation of cellular protein	GO:0007249 I-kappaB kinase/NF-kappaB sign	GO:0080135 regulation of cellular respons	GO:0008285 negative regulation of cell pr	GO:0019886 antigen processing and present
LLGL2	3993	symbol	H. sapiens	3993	H. sapiens	0.0	0.0	0.0	0.0	0.0	0.0	0.0	0.0	0.0	0.0	0.0	0.0	0.0	0.0	0.0	0.0	0.0	0.0	0.0	0.0
SULT2B1	6820	symbol	H. sapiens	6820	H. sapiens	0.0	0.0	0.0	0.0	0.0	0.0	0.0	0.0	1.0	0.0	0.0	0.0	0.0	0.0	0.0	0.0	0.0	0.0	1.0	0.0
OAS1	4938	symbol	H. sapiens	4938	H. sapiens	1.0	0.0	0.0	0.0	0.0	0.0	0.0	0.0	0.0	0.0	0.0	0.0	0.0	0.0	1.0	0.0	0.0	0.0	0.0	0.0
PSME1	5720	symbol	H. sapiens	5720	H. sapiens	1.0	1.0	1.0	0.0	1.0	1.0	0.0	0.0	0.0	0.0	0.0	1.0	0.0	1.0	0.0	0.0	0.0	0.0	0.0	0.0
USP18	11274	symbol	H. sapiens	11274	H. sapiens	1.0	0.0	1.0	0.0	1.0	0.0	0.0	0.0	0.0	0.0	0.0	0.0	0.0	1.0	0.0	0.0	0.0	0.0	0.0	0.0
NFKBIA	4792	symbol	H. sapiens	4792	H. sapiens	1.0	0.0	0.0	0.0	1.0	0.0	0.0	0.0	0.0	0.0	0.0	0.0	1.0	1.0	0.0	0.0	1.0	0.0	0.0	0.0
ABCD1	215	symbol	H. sapiens	215	H. sapiens	0.0	0.0	1.0	0.0	0.0	1.0	0.0	1.0	1.0	0.0	0.0	0.0	0.0	1.0	0.0	0.0	0.0	1.0	0.0	0.0
USP11	8237	symbol	H. sapiens	8237	H. sapiens	0.0	0.0	1.0	0.0	0.0	0.0	0.0	0.0	0.0	0.0	0.0	0.0	0.0	1.0	0.0	0.0	0.0	0.0	0.0	0.0
TIMP1	7076	symbol	H. sapiens	7076	H. sapiens	1.0	0.0	1.0	0.0	0.0	0.0	1.0	0.0	0.0	0.0	0.0	1.0	1.0	1.0	0.0	0.0	0.0	0.0	0.0	0.0
NDFIP2	54602	symbol	H. sapiens	54602	H. sapiens	0.0	0.0	1.0	0.0	0.0	0.0	0.0	0.0	0.0	0.0	0.0	0.0	0.0	0.0	0.0	1.0	1.0	0.0	0.0	0.0
VPS18	57617	symbol	H. sapiens	57617	H. sapiens	1.0	0.0	0.0	1.0	0.0	0.0	1.0	0.0	0.0	1.0	0.0	0.0	0.0	0.0	0.0	1.0	0.0	0.0	0.0	0.0
FDFT1	2222	symbol	H. sapiens	2222	H. sapiens	0.0	0.0	0.0	0.0	0.0	1.0	0.0	0.0	1.0	0.0	0.0	0.0	0.0	0.0	0.0	0.0	0.0	0.0	0.0	0.0
PNPLA6	10908	symbol	H. sapiens	10908	H. sapiens	0.0	0.0	0.0	0.0	0.0	0.0	0.0	0.0	0.0	0.0	0.0	0.0	0.0	0.0	0.0	0.0	0.0	0.0	0.0	0.0
ECH1	1891	symbol	H. sapiens	1891	H. sapiens	0.0	0.0	0.0	0.0	0.0	0.0	0.0	0.0	0.0	0.0	0.0	0.0	0.0	0.0	0.0	0.0	0.0	0.0	0.0	0.0
RABAC1	10567	symbol	H. sapiens	10567	H. sapiens	0.0	0.0	0.0	0.0	0.0	0.0	0.0	0.0	0.0	0.0	0.0	0.0	0.0	0.0	0.0	0.0	0.0	0.0	0.0	0.0
CHMP5	51510	symbol	H. sapiens	51510	H. sapiens	1.0	0.0	0.0	0.0	0.0	0.0	0.0	0.0	0.0	0.0	0.0	0.0	1.0	1.0	0.0	0.0	0.0	0.0	0.0	0.0
DNAJC12	56521	symbol	H. sapiens	56521	H. sapiens	0.0	0.0	0.0	0.0	0.0	0.0	0.0	0.0	0.0	0.0	0.0	0.0	0.0	0.0	0.0	0.0	0.0	0.0	0.0	0.0
OAS3	4940	symbol	H. sapiens	4940	H. sapiens	1.0	0.0	0.0	0.0	0.0	0.0	0.0	0.0	0.0	0.0	0.0	0.0	0.0	0.0	1.0	0.0	0.0	0.0	0.0	0.0
C12orf57	113246	symbol	H. sapiens	113246	H. sapiens	0.0	0.0	0.0	0.0	0.0	0.0	0.0	0.0	0.0	0.0	1.0	0.0	0.0	0.0	0.0	0.0	0.0	0.0	0.0	0.0
SLC19A2	10560	symbol	H. sapiens	10560	H. sapiens	0.0	0.0	0.0	0.0	0.0	0.0	0.0	0.0	0.0	0.0	0.0	0.0	0.0	0.0	0.0	0.0	0.0	0.0	0.0	0.0
GLRX	2745	symbol	H. sapiens	2745	H. sapiens	0.0	0.0	0.0	0.0	0.0	0.0	0.0	0.0	0.0	0.0	0.0	0.0	0.0	0.0	0.0	0.0	0.0	0.0	0.0	0.0
IFI27L2	83982	symbol	H. sapiens	83982	H. sapiens	0.0	0.0	0.0	0.0	0.0	0.0	0.0	0.0	0.0	0.0	0.0	0.0	0.0	0.0	0.0	0.0	0.0	0.0	0.0	0.0
ACADS	35	symbol	H. sapiens	35	H. sapiens	0.0	0.0	0.0	0.0	0.0	0.0	0.0	0.0	0.0	0.0	0.0	0.0	0.0	0.0	0.0	0.0	0.0	0.0	0.0	0.0
NMI	9111	symbol	H. sapiens	9111	H. sapiens	1.0	0.0	1.0	0.0	1.0	0.0	0.0	1.0	0.0	0.0	0.0	0.0	0.0	0.0	0.0	0.0	0.0	0.0	0.0	0.0
NT5C	30833	symbol	H. sapiens	30833	H. sapiens	0.0	0.0	0.0	0.0	0.0	0.0	0.0	0.0	0.0	0.0	0.0	0.0	0.0	1.0	0.0	0.0	0.0	0.0	0.0	0.0
MLX	6945	symbol	H. sapiens	6945	H. sapiens	0.0	0.0	0.0	0.0	0.0	0.0	0.0	0.0	0.0	0.0	0.0	0.0	0.0	0.0	0.0	0.0	0.0	0.0	0.0	0.0
AP1M2	10053	symbol	H. sapiens	10053	H. sapiens	0.0	1.0	0.0	0.0	0.0	0.0	0.0	0.0	0.0	0.0	0.0	0.0	0.0	0.0	0.0	0.0	0.0	0.0	0.0	1.0
LDLR	3949	symbol	H. sapiens	3949	H. sapiens	1.0	0.0	1.0	0.0	1.0	1.0	1.0	0.0	1.0	1.0	0.0	0.0	0.0	0.0	0.0	0.0	0.0	0.0	0.0	0.0
BST2	684	symbol	H. sapiens	684	H. sapiens	1.0	1.0	0.0	0.0	0.0	0.0	1.0	1.0	0.0	1.0	1.0	1.0	0.0	0.0	0.0	0.0	1.0	0.0	0.0	0.0
SHFL	55337	symbol	H. sapiens	55337	H. sapiens	1.0	0.0	0.0	0.0	0.0	0.0	0.0	0.0	0.0	0.0	0.0	0.0	0.0	0.0	0.0	0.0	0.0	0.0	0.0	0.0
WBP2	23558	symbol	H. sapiens	23558	H. sapiens	0.0	0.0	0.0	0.0	0.0	0.0	0.0	0.0	0.0	0.0	0.0	0.0	1.0	0.0	0.0	0.0	0.0	0.0	0.0	0.0
PLAAT4	5920	symbol	H. sapiens	5920	H. sapiens	0.0	0.0	0.0	0.0	0.0	0.0	0.0	0.0	0.0	0.0	0.0	0.0	0.0	0.0	0.0	0.0	0.0	0.0	1.0	0.0
OASL	8638	symbol	H. sapiens	8638	H. sapiens	1.0	0.0	0.0	0.0	0.0	0.0	0.0	0.0	0.0	0.0	0.0	0.0	0.0	0.0	1.0	0.0	0.0	0.0	0.0	0.0
CD63	967	symbol	H. sapiens	967	H. sapiens	0.0	0.0	0.0	0.0	0.0	0.0	1.0	0.0	0.0	0.0	0.0	0.0	1.0	0.0	0.0	0.0	0.0	0.0	0.0	0.0
SP110	3431	symbol	H. sapiens	3431	H. sapiens	0.0	0.0	0.0	0.0	0.0	0.0	0.0	0.0	0.0	0.0	0.0	0.0	0.0	0.0	0.0	0.0	0.0	0.0	0.0	0.0
DRAM1	55332	symbol	H. sapiens	55332	H. sapiens	0.0	0.0	0.0	1.0	0.0	0.0	0.0	0.0	0.0	0.0	0.0	0.0	0.0	0.0	0.0	0.0	0.0	0.0	0.0	0.0
IER3	8870	symbol	H. sapiens	8870	H. sapiens	0.0	0.0	0.0	0.0	0.0	0.0	0.0	0.0	0.0	0.0	0.0	0.0	0.0	0.0	0.0	0.0	0.0	1.0	0.0	0.0
TMEM62	80021	symbol	H. sapiens	80021	H. sapiens	0.0	0.0	0.0	0.0	0.0	0.0	0.0	0.0	0.0	0.0	0.0	0.0	0.0	0.0	0.0	0.0	0.0	0.0	0.0	0.0
SREBF1	6720	symbol	H. sapiens	6720	H. sapiens	0.0	0.0	0.0	1.0	0.0	1.0	0.0	0.0	1.0	0.0	0.0	0.0	1.0	0.0	0.0	1.0	0.0	0.0	0.0	0.0
SCPEP1	59342	symbol	H. sapiens	59342	H. sapiens	0.0	0.0	1.0	0.0	0.0	0.0	0.0	0.0	1.0	0.0	1.0	0.0	0.0	0.0	0.0	0.0	0.0	0.0	0.0	0.0
LGALS3BP	3959	symbol	H. sapiens	3959	H. sapiens	0.0	0.0	0.0	0.0	0.0	0.0	1.0	0.0	0.0	0.0	0.0	0.0	0.0	0.0	0.0	0.0	0.0	0.0	0.0	0.0
SAMHD1	25939	symbol	H. sapiens	25939	H. sapiens	1.0	0.0	0.0	0.0	1.0	0.0	0.0	0.0	0.0	0.0	0.0	0.0	0.0	1.0	0.0	0.0	0.0	0.0	0.0	0.0
MREG	55686	symbol	H. sapiens	55686	H. sapiens	0.0	0.0	0.0	0.0	0.0	0.0	0.0	0.0	0.0	0.0	0.0	0.0	0.0	0.0	0.0	0.0	0.0	0.0	0.0	0.0
UPK2	7379	symbol	H. sapiens	7379	H. sapiens	0.0	0.0	0.0	0.0	0.0	0.0	0.0	0.0	0.0	0.0	0.0	0.0	0.0	0.0	0.0	0.0	0.0	0.0	0.0	0.0
CSTA	1475	symbol	H. sapiens	1475	H. sapiens	0.0	0.0	0.0	0.0	0.0	0.0	0.0	0.0	0.0	0.0	0.0	1.0	0.0	0.0	0.0	0.0	0.0	0.0	0.0	0.0
ABCB6	10058	symbol	H. sapiens	10058	H. sapiens	0.0	0.0	0.0	0.0	0.0	0.0	0.0	0.0	0.0	0.0	0.0	0.0	0.0	0.0	0.0	0.0	0.0	0.0	0.0	0.0
SQLE	6713	symbol	H. sapiens	6713	H. sapiens	0.0	0.0	0.0	0.0	0.0	1.0	0.0	0.0	1.0	0.0	0.0	0.0	0.0	0.0	0.0	0.0	0.0	0.0	0.0	0.0
ABAT	18	symbol	H. sapiens	18	H. sapiens	0.0	0.0	0.0	0.0	0.0	0.0	0.0	0.0	1.0	0.0	0.0	0.0	0.0	1.0	0.0	1.0	0.0	0.0	0.0	0.0
ABCA12	26154	symbol	H. sapiens	26154	H. sapiens	0.0	0.0	0.0	0.0	0.0	0.0	1.0	0.0	0.0	0.0	0.0	0.0	0.0	0.0	0.0	1.0	0.0	0.0	0.0	0.0
FAM83A	84985	symbol	H. sapiens	84985	H. sapiens	0.0	0.0	0.0	0.0	0.0	0.0	0.0	0.0	0.0	0.0	0.0	0.0	1.0	0.0	0.0	0.0	0.0	0.0	0.0	0.0
LCN2	3934	symbol	H. sapiens	3934	H. sapiens	1.0	0.0	0.0	0.0	0.0	0.0	1.0	0.0	0.0	0.0	1.0	1.0	0.0	1.0	0.0	0.0	0.0	0.0	0.0	0.0
SEC24D	9871	symbol	H. sapiens	9871	H. sapiens	0.0	1.0	0.0	0.0	0.0	0.0	0.0	0.0	0.0	0.0	0.0	0.0	0.0	0.0	0.0	0.0	0.0	0.0	0.0	1.0
HSPB8	26353	symbol	H. sapiens	26353	H. sapiens	0.0	0.0	1.0	1.0	0.0	0.0	0.0	0.0	0.0	0.0	0.0	0.0	0.0	0.0	0.0	0.0	0.0	1.0	0.0	0.0
BATF	10538	symbol	H. sapiens	10538	H. sapiens	1.0	1.0	0.0	0.0	0.0	0.0	1.0	1.0	0.0	0.0	0.0	0.0	0.0	1.0	0.0	0.0	0.0	0.0	0.0	0.0
STOM	2040	symbol	H. sapiens	2040	H. sapiens	1.0	0.0	0.0	0.0	0.0	0.0	1.0	0.0	0.0	0.0	0.0	0.0	0.0	0.0	0.0	1.0	0.0	0.0	0.0	0.0
UBE2L6	9246	symbol	H. sapiens	9246	H. sapiens	0.0	0.0	1.0	0.0	0.0	0.0	0.0	1.0	0.0	0.0	0.0	0.0	0.0	0.0	0.0	0.0	0.0	0.0	0.0	0.0
H2BC5	3017	symbol	H. sapiens	3017	H. sapiens	0.0	0.0	0.0	0.0	0.0	0.0	0.0	0.0	0.0	0.0	0.0	0.0	0.0	0.0	0.0	0.0	0.0	0.0	0.0	0.0
OGFR	11054	symbol	H. sapiens	11054	H. sapiens	0.0	0.0	0.0	0.0	0.0	0.0	0.0	0.0	0.0	0.0	1.0	0.0	0.0	0.0	0.0	0.0	0.0	0.0	0.0	0.0
AMFR	267	symbol	H. sapiens	267	H. sapiens	0.0	0.0	1.0	0.0	0.0	0.0	0.0	0.0	0.0	0.0	0.0	0.0	0.0	0.0	0.0	0.0	0.0	0.0	0.0	0.0
TFF1	7031	symbol	H. sapiens	7031	H. sapiens	0.0	0.0	0.0	0.0	0.0	0.0	0.0	0.0	0.0	0.0	0.0	0.0	1.0	0.0	0.0	0.0	0.0	0.0	1.0	0.0
CSTB	1476	symbol	H. sapiens	1476	H. sapiens	0.0	0.0	0.0	0.0	0.0	0.0	1.0	0.0	0.0	0.0	0.0	1.0	0.0	0.0	0.0	0.0	0.0	0.0	0.0	0.0
ALOX15	246	symbol	H. sapiens	246	H. sapiens	1.0	1.0	0.0	0.0	0.0	0.0	0.0	0.0	1.0	0.0	1.0	0.0	0.0	0.0	0.0	0.0	0.0	0.0	0.0	0.0
METTL26	84326	symbol	H. sapiens	84326	H. sapiens	0.0	0.0	0.0	0.0	0.0	0.0	0.0	0.0	0.0	0.0	0.0	0.0	0.0	0.0	0.0	0.0	0.0	0.0	0.0	0.0
NUDT16L1	84309	symbol	H. sapiens	84309	H. sapiens	0.0	0.0	0.0	0.0	0.0	0.0	0.0	0.0	0.0	0.0	0.0	0.0	0.0	1.0	0.0	0.0	0.0	1.0	0.0	0.0
LAMB2	3913	symbol	H. sapiens	3913	H. sapiens	0.0	0.0	0.0	0.0	0.0	0.0	0.0	0.0	0.0	0.0	1.0	0.0	0.0	1.0	0.0	0.0	0.0	0.0	0.0	0.0
TRIM56	81844	symbol	H. sapiens	81844	H. sapiens	1.0	0.0	1.0	0.0	0.0	0.0	0.0	1.0	0.0	0.0	0.0	0.0	0.0	0.0	0.0	0.0	0.0	0.0	0.0	0.0
PPIC	5480	symbol	H. sapiens	5480	H. sapiens	0.0	0.0	0.0	0.0	0.0	0.0	0.0	0.0	0.0	0.0	0.0	0.0	0.0	0.0	0.0	0.0	0.0	0.0	0.0	0.0
CYBC1	79415	symbol	H. sapiens	79415	H. sapiens	0.0	0.0	0.0	0.0	0.0	0.0	0.0	0.0	0.0	0.0	0.0	0.0	0.0	0.0	0.0	0.0	0.0	0.0	0.0	0.0
GOLT1A	127845	symbol	H. sapiens	127845	H. sapiens	0.0	0.0	0.0	0.0	0.0	0.0	0.0	0.0	0.0	0.0	0.0	0.0	0.0	0.0	0.0	0.0	0.0	0.0	0.0	0.0
RAB1B	81876	symbol	H. sapiens	81876	H. sapiens	1.0	0.0	0.0	1.0	0.0	0.0	0.0	0.0	0.0	0.0	0.0	0.0	0.0	1.0	0.0	0.0	0.0	0.0	0.0	0.0
SIAH2	6478	symbol	H. sapiens	6478	H. sapiens	0.0	0.0	1.0	0.0	0.0	0.0	0.0	0.0	0.0	0.0	0.0	1.0	0.0	1.0	0.0	0.0	0.0	0.0	0.0	0.0
PARP10	84875	symbol	H. sapiens	84875	H. sapiens	1.0	0.0	1.0	0.0	0.0	0.0	0.0	0.0	0.0	0.0	0.0	0.0	0.0	0.0	0.0	0.0	0.0	0.0	1.0	0.0
ZNF227	7770	symbol	H. sapiens	7770	H. sapiens	0.0	0.0	0.0	0.0	0.0	0.0	0.0	0.0	0.0	0.0	0.0	0.0	0.0	0.0	0.0	0.0	0.0	0.0	0.0	0.0
GRINA	2907	symbol	H. sapiens	2907	H. sapiens	0.0	0.0	0.0	0.0	0.0	0.0	0.0	0.0	0.0	0.0	0.0	1.0	0.0	0.0	0.0	0.0	0.0	1.0	0.0	0.0
STAT2	6773	symbol	H. sapiens	6773	H. sapiens	1.0	0.0	0.0	0.0	0.0	0.0	0.0	0.0	0.0	0.0	0.0	0.0	1.0	0.0	0.0	0.0	0.0	0.0	0.0	0.0
PHLDA2	7262	symbol	H. sapiens	7262	H. sapiens	0.0	0.0	0.0	0.0	0.0	1.0	0.0	0.0	0.0	0.0	1.0	0.0	0.0	0.0	0.0	0.0	0.0	0.0	0.0	0.0
H2BC4	8347	symbol	H. sapiens	8347	H. sapiens	1.0	0.0	0.0	0.0	0.0	0.0	0.0	0.0	0.0	0.0	0.0	0.0	0.0	0.0	0.0	0.0	0.0	0.0	0.0	0.0
SULT1A1	6817	symbol	H. sapiens	6817	H. sapiens	0.0	0.0	0.0	0.0	0.0	0.0	0.0	0.0	1.0	0.0	0.0	0.0	0.0	1.0	0.0	0.0	0.0	0.0	0.0	0.0
COPG1	22820	symbol	H. sapiens	22820	H. sapiens	0.0	0.0	0.0	0.0	0.0	0.0	0.0	0.0	0.0	0.0	0.0	0.0	0.0	0.0	0.0	0.0	0.0	0.0	0.0	0.0
MTG1	92170	symbol	H. sapiens	92170	H. sapiens	0.0	0.0	0.0	0.0	0.0	0.0	0.0	0.0	0.0	0.0	0.0	0.0	0.0	0.0	0.0	0.0	0.0	0.0	0.0	0.0
COL3A1	1281	symbol	H. sapiens	1281	H. sapiens	0.0	0.0	0.0	0.0	0.0	0.0	0.0	0.0	0.0	0.0	0.0	0.0	1.0	1.0	0.0	0.0	0.0	0.0	0.0	0.0
RAPH1	65059	symbol	H. sapiens	65059	H. sapiens	0.0	0.0	0.0	0.0	0.0	0.0	0.0	0.0	0.0	0.0	1.0	0.0	0.0	0.0	0.0	0.0	0.0	0.0	0.0	0.0
BASP1	10409	symbol	H. sapiens	10409	H. sapiens	0.0	0.0	0.0	0.0	0.0	0.0	0.0	0.0	0.0	0.0	1.0	0.0	0.0	1.0	0.0	0.0	0.0	0.0	0.0	0.0
ZNF687	57592	symbol	H. sapiens	57592	H. sapiens	0.0	0.0	0.0	0.0	0.0	0.0	0.0	0.0	0.0	0.0	0.0	0.0	0.0	0.0	0.0	0.0	0.0	0.0	0.0	0.0
HMGCS1	3157	symbol	H. sapiens	3157	H. sapiens	0.0	0.0	0.0	0.0	0.0	1.0	0.0	0.0	1.0	0.0	0.0	0.0	1.0	0.0	0.0	0.0	0.0	0.0	0.0	0.0
NFKBIZ	64332	symbol	H. sapiens	64332	H. sapiens	0.0	1.0	0.0	0.0	1.0	0.0	1.0	0.0	0.0	0.0	0.0	0.0	0.0	1.0	0.0	0.0	0.0	0.0	0.0	0.0
MAGED1	9500	symbol	H. sapiens	9500	H. sapiens	0.0	0.0	0.0	0.0	0.0	0.0	0.0	0.0	0.0	0.0	0.0	1.0	0.0	1.0	0.0	0.0	0.0	1.0	1.0	0.0
PTGER4P2	5736	symbol	H. sapiens	5736	H. sapiens	0.0	0.0	0.0	0.0	0.0	0.0	0.0	0.0	0.0	0.0	0.0	0.0	0.0	0.0	0.0	0.0	0.0	0.0	0.0	0.0
ATP6V0C	527	symbol	H. sapiens	527	H. sapiens	0.0	0.0	0.0	1.0	0.0	0.0	1.0	0.0	0.0	0.0	0.0	0.0	1.0	1.0	0.0	0.0	0.0	0.0	0.0	0.0
MX2	4600	symbol	H. sapiens	4600	H. sapiens	1.0	0.0	0.0	0.0	0.0	0.0	0.0	0.0	0.0	1.0	0.0	0.0	0.0	0.0	0.0	1.0	0.0	0.0	0.0	0.0
ABCC5	10057	symbol	H. sapiens	10057	H. sapiens	0.0	0.0	0.0	0.0	0.0	0.0	0.0	0.0	0.0	0.0	0.0	0.0	0.0	0.0	0.0	0.0	0.0	0.0	0.0	0.0
ATP5IF1	93974	symbol	H. sapiens	93974	H. sapiens	0.0	0.0	1.0	1.0	0.0	1.0	0.0	0.0	0.0	0.0	0.0	1.0	0.0	0.0	0.0	1.0	0.0	0.0	1.0	0.0
RHOC	389	symbol	H. sapiens	389	H. sapiens	0.0	0.0	0.0	0.0	0.0	0.0	0.0	0.0	0.0	0.0	1.0	0.0	0.0	1.0	0.0	0.0	1.0	0.0	0.0	0.0
IFI6	2537	symbol	H. sapiens	2537	H. sapiens	1.0	0.0	0.0	0.0	0.0	0.0	0.0	0.0	0.0	0.0	0.0	1.0	1.0	0.0	0.0	0.0	0.0	0.0	0.0	0.0
S100A13	6284	symbol	H. sapiens	6284	H. sapiens	0.0	0.0	0.0	0.0	0.0	0.0	1.0	1.0	0.0	0.0	1.0	0.0	0.0	0.0	0.0	0.0	1.0	0.0	0.0	0.0
SERF2	10169	symbol	H. sapiens	10169	H. sapiens	0.0	0.0	0.0	0.0	0.0	0.0	0.0	0.0	0.0	0.0	0.0	0.0	0.0	0.0	0.0	0.0	0.0	0.0	0.0	0.0
INSIG1	3638	symbol	H. sapiens	3638	H. sapiens	0.0	0.0	0.0	0.0	0.0	1.0	0.0	0.0	1.0	0.0	0.0	0.0	0.0	0.0	0.0	1.0	0.0	1.0	0.0	0.0
HM13	81502	symbol	H. sapiens	81502	H. sapiens	0.0	0.0	1.0	0.0	0.0	0.0	0.0	0.0	0.0	0.0	0.0	0.0	0.0	0.0	0.0	0.0	0.0	0.0	0.0	0.0
TRIM14	9830	symbol	H. sapiens	9830	H. sapiens	1.0	0.0	0.0	0.0	0.0	0.0	0.0	0.0	0.0	0.0	0.0	0.0	0.0	0.0	0.0	0.0	0.0	0.0	0.0	0.0
TAF1C	9013	symbol	H. sapiens	9013	H. sapiens	0.0	0.0	0.0	0.0	0.0	0.0	0.0	0.0	0.0	0.0	0.0	0.0	0.0	0.0	0.0	0.0	0.0	0.0	0.0	0.0
H1-2	3006	symbol	H. sapiens	3006	H. sapiens	0.0	0.0	0.0	0.0	0.0	0.0	0.0	0.0	0.0	0.0	0.0	0.0	0.0	0.0	0.0	0.0	0.0	0.0	0.0	0.0
S100A14	57402	symbol	H. sapiens	57402	H. sapiens	1.0	0.0	0.0	0.0	1.0	0.0	0.0	0.0	0.0	0.0	0.0	0.0	0.0	0.0	0.0	0.0	0.0	0.0	0.0	0.0
NDOR1	27158	symbol	H. sapiens	27158	H. sapiens	0.0	0.0	0.0	0.0	0.0	0.0	0.0	0.0	0.0	0.0	0.0	0.0	0.0	0.0	0.0	0.0	0.0	0.0	0.0	0.0
DDIT3	1649	symbol	H. sapiens	1649	H. sapiens	0.0	0.0	1.0	1.0	0.0	0.0	0.0	1.0	0.0	0.0	0.0	1.0	0.0	1.0	0.0	0.0	0.0	1.0	0.0	0.0
SMG7	9887	symbol	H. sapiens	9887	H. sapiens	0.0	0.0	0.0	0.0	0.0	0.0	0.0	0.0	0.0	0.0	0.0	0.0	0.0	1.0	0.0	0.0	0.0	0.0	0.0	0.0
ALDH3B2	222	symbol	H. sapiens	222	H. sapiens	0.0	0.0	0.0	0.0	0.0	0.0	0.0	0.0	1.0	0.0	0.0	0.0	0.0	0.0	0.0	0.0	0.0	0.0	0.0	0.0
B2M	567	symbol	H. sapiens	567	H. sapiens	1.0	1.0	0.0	0.0	0.0	0.0	1.0	1.0	0.0	0.0	1.0	0.0	0.0	0.0	0.0	0.0	0.0	1.0	1.0	0.0
AKR1A1	10327	symbol	H. sapiens	10327	H. sapiens	0.0	0.0	0.0	0.0	0.0	1.0	0.0	0.0	1.0	0.0	0.0	0.0	0.0	0.0	0.0	0.0	0.0	0.0	0.0	0.0
TAP1	6890	symbol	H. sapiens	6890	H. sapiens	0.0	1.0	0.0	0.0	0.0	0.0	0.0	0.0	0.0	0.0	0.0	0.0	0.0	0.0	0.0	0.0	0.0	0.0	0.0	0.0
LSR	51599	symbol	H. sapiens	51599	H. sapiens	0.0	0.0	0.0	0.0	0.0	0.0	0.0	0.0	1.0	0.0	0.0	0.0	0.0	0.0	0.0	0.0	0.0	0.0	0.0	0.0
DNM2	1785	symbol	H. sapiens	1785	H. sapiens	0.0	1.0	0.0	0.0	0.0	0.0	0.0	0.0	0.0	0.0	1.0	1.0	1.0	1.0	0.0	0.0	0.0	0.0	0.0	1.0
CAB39L	81617	symbol	H. sapiens	81617	H. sapiens	0.0	0.0	0.0	0.0	0.0	0.0	0.0	0.0	0.0	0.0	0.0	0.0	0.0	0.0	0.0	0.0	0.0	0.0	0.0	0.0
RAC1	5879	symbol	H. sapiens	5879	H. sapiens	0.0	0.0	0.0	0.0	1.0	0.0	1.0	1.0	0.0	0.0	1.0	0.0	1.0	1.0	0.0	1.0	0.0	0.0	0.0	0.0
H2BC12	85236	symbol	H. sapiens	85236	H. sapiens	1.0	1.0	0.0	0.0	0.0	0.0	0.0	0.0	0.0	0.0	0.0	0.0	0.0	0.0	0.0	0.0	0.0	0.0	0.0	0.0
ADIPOR2	79602	symbol	H. sapiens	79602	H. sapiens	1.0	0.0	0.0	0.0	0.0	1.0	0.0	0.0	1.0	0.0	1.0	0.0	1.0	0.0	0.0	0.0	0.0	0.0	0.0	0.0
MVP	9961	symbol	H. sapiens	9961	H. sapiens	0.0	0.0	0.0	0.0	0.0	0.0	1.0	0.0	0.0	0.0	0.0	0.0	1.0	0.0	0.0	0.0	0.0	0.0	0.0	0.0
MOV10	4343	symbol	H. sapiens	4343	H. sapiens	0.0	0.0	1.0	0.0	0.0	0.0	0.0	0.0	0.0	0.0	1.0	0.0	0.0	1.0	0.0	0.0	0.0	0.0	0.0	0.0
ZFYVE27	118813	symbol	H. sapiens	118813	H. sapiens	0.0	0.0	0.0	0.0	0.0	0.0	0.0	0.0	0.0	0.0	1.0	0.0	1.0	0.0	0.0	0.0	0.0	0.0	0.0	0.0
MYOF	26509	symbol	H. sapiens	26509	H. sapiens	0.0	0.0	0.0	0.0	0.0	0.0	0.0	0.0	1.0	0.0	0.0	0.0	1.0	0.0	0.0	0.0	0.0	0.0	0.0	0.0
POM121	9883	symbol	H. sapiens	9883	H. sapiens	1.0	0.0	0.0	0.0	0.0	1.0	0.0	0.0	0.0	0.0	0.0	0.0	0.0	1.0	0.0	0.0	0.0	1.0	0.0	0.0
APOL2	23780	symbol	H. sapiens	23780	H. sapiens	0.0	0.0	0.0	0.0	0.0	0.0	0.0	0.0	1.0	0.0	0.0	0.0	0.0	0.0	0.0	0.0	0.0	0.0	0.0	0.0
PSMB10	5699	symbol	H. sapiens	5699	H. sapiens	1.0	1.0	1.0	0.0	1.0	1.0	0.0	0.0	0.0	0.0	0.0	0.0	0.0	1.0	0.0	0.0	0.0	0.0	0.0	0.0
H2AC13	8329	symbol	H. sapiens	8329	H. sapiens	0.0	0.0	0.0	0.0	0.0	0.0	0.0	0.0	0.0	0.0	0.0	0.0	0.0	0.0	0.0	0.0	0.0	0.0	0.0	0.0
SLC26A6	65010	symbol	H. sapiens	65010	H. sapiens	1.0	0.0	0.0	0.0	0.0	0.0	0.0	0.0	0.0	0.0	0.0	0.0	1.0	0.0	0.0	1.0	0.0	0.0	0.0	0.0
SPTSSB	165679	symbol	H. sapiens	165679	H. sapiens	0.0	0.0	0.0	0.0	0.0	0.0	0.0	0.0	1.0	0.0	0.0	0.0	0.0	0.0	0.0	0.0	0.0	0.0	0.0	0.0
PCBP2	5094	symbol	H. sapiens	5094	H. sapiens	1.0	0.0	1.0	0.0	0.0	0.0	0.0	1.0	0.0	0.0	0.0	0.0	0.0	0.0	0.0	0.0	0.0	0.0	0.0	0.0
HLA-DRB1	3123	symbol	H. sapiens	3123	H. sapiens	1.0	1.0	0.0	0.0	1.0	0.0	0.0	0.0	0.0	0.0	0.0	0.0	0.0	1.0	0.0	0.0	0.0	0.0	0.0	1.0
AFAP1	60312	symbol	H. sapiens	60312	H. sapiens	0.0	0.0	0.0	0.0	0.0	0.0	0.0	0.0	0.0	0.0	0.0	0.0	0.0	0.0	0.0	0.0	0.0	0.0	0.0	0.0
PIM3	415116	symbol	H. sapiens	415116	H. sapiens	0.0	0.0	0.0	0.0	0.0	0.0	0.0	0.0	0.0	0.0	0.0	0.0	0.0	1.0	0.0	1.0	0.0	0.0	0.0	0.0
SQSTM1	8878	symbol	H. sapiens	8878	H. sapiens	1.0	0.0	1.0	1.0	0.0	0.0	0.0	0.0	0.0	0.0	0.0	1.0	0.0	1.0	0.0	1.0	1.0	0.0	0.0	0.0
STAT1	6772	symbol	H. sapiens	6772	H. sapiens	1.0	0.0	0.0	0.0	1.0	0.0	0.0	1.0	0.0	1.0	0.0	0.0	1.0	1.0	0.0	0.0	1.0	0.0	1.0	0.0
IGSF1	3547	symbol	H. sapiens	3547	H. sapiens	0.0	0.0	0.0	0.0	0.0	0.0	0.0	0.0	0.0	0.0	0.0	0.0	0.0	0.0	0.0	0.0	0.0	0.0	0.0	0.0
KRT19	3880	symbol	H. sapiens	3880	H. sapiens	0.0	0.0	0.0	0.0	0.0	0.0	0.0	0.0	0.0	0.0	0.0	0.0	0.0	0.0	0.0	0.0	0.0	0.0	0.0	0.0
RN7SKP173	106635535	symbol	H. sapiens	106635535	H. sapiens	0.0	0.0	0.0	0.0	0.0	0.0	0.0	0.0	0.0	0.0	0.0	0.0	0.0	0.0	0.0	0.0	0.0	0.0	0.0	0.0
QPCTL	54814	symbol	H. sapiens	54814	H. sapiens	0.0	0.0	0.0	0.0	0.0	0.0	0.0	0.0	0.0	0.0	0.0	0.0	0.0	0.0	0.0	0.0	0.0	0.0	0.0	0.0
MRPL55	128308	symbol	H. sapiens	128308	H. sapiens	0.0	0.0	0.0	0.0	0.0	0.0	0.0	0.0	0.0	0.0	0.0	0.0	0.0	0.0	0.0	0.0	0.0	0.0	0.0	0.0
SOD2	6648	symbol	H. sapiens	6648	H. sapiens	1.0	0.0	0.0	0.0	0.0	0.0	0.0	0.0	0.0	0.0	1.0	1.0	0.0	0.0	0.0	0.0	0.0	1.0	1.0	0.0
SLC41A1	254428	symbol	H. sapiens	254428	H. sapiens	0.0	0.0	0.0	0.0	0.0	0.0	0.0	0.0	0.0	0.0	0.0	0.0	0.0	0.0	0.0	0.0	0.0	0.0	0.0	0.0
CRABP2	1382	symbol	H. sapiens	1382	H. sapiens	0.0	0.0	0.0	0.0	0.0	0.0	0.0	0.0	1.0	0.0	1.0	0.0	0.0	0.0	0.0	0.0	0.0	0.0	0.0	0.0
SLC50A1	55974	symbol	H. sapiens	55974	H. sapiens	0.0	0.0	0.0	0.0	0.0	0.0	0.0	0.0	0.0	0.0	0.0	0.0	0.0	0.0	0.0	0.0	0.0	0.0	0.0	0.0
S100A16	140576	symbol	H. sapiens	140576	H. sapiens	0.0	0.0	0.0	0.0	0.0	0.0	0.0	0.0	0.0	0.0	0.0	0.0	0.0	0.0	0.0	0.0	0.0	0.0	0.0	0.0
S100A6	6277	symbol	H. sapiens	6277	H. sapiens	0.0	0.0	0.0	0.0	0.0	0.0	0.0	0.0	0.0	0.0	1.0	0.0	0.0	0.0	0.0	0.0	0.0	0.0	0.0	0.0
S100A8	6279	symbol	H. sapiens	6279	H. sapiens	1.0	0.0	0.0	1.0	1.0	0.0	1.0	1.0	0.0	0.0	1.0	1.0	0.0	0.0	0.0	1.0	0.0	0.0	0.0	0.0
S100A9	6280	symbol	H. sapiens	6280	H. sapiens	1.0	0.0	0.0	1.0	1.0	0.0	1.0	1.0	0.0	0.0	1.0	1.0	0.0	0.0	0.0	0.0	0.0	0.0	0.0	0.0
SELENBP1	8991	symbol	H. sapiens	8991	H. sapiens	0.0	0.0	0.0	0.0	0.0	0.0	0.0	0.0	0.0	0.0	0.0	0.0	0.0	0.0	0.0	0.0	0.0	0.0	0.0	0.0
ANXA9	8416	symbol	H. sapiens	8416	H. sapiens	0.0	0.0	0.0	0.0	0.0	0.0	0.0	0.0	0.0	0.0	0.0	0.0	0.0	0.0	0.0	0.0	0.0	0.0	0.0	0.0
CERS2	29956	symbol	H. sapiens	29956	H. sapiens	0.0	0.0	0.0	0.0	0.0	0.0	0.0	0.0	1.0	0.0	1.0	0.0	0.0	0.0	0.0	0.0	0.0	1.0	1.0	0.0
H3C14	126961	symbol	H. sapiens	126961	H. sapiens	1.0	0.0	0.0	0.0	0.0	0.0	0.0	0.0	0.0	0.0	0.0	0.0	0.0	0.0	0.0	0.0	0.0	0.0	0.0	0.0
ATP6AP1	537	symbol	H. sapiens	537	H. sapiens	0.0	0.0	0.0	0.0	0.0	0.0	0.0	0.0	0.0	0.0	1.0	0.0	1.0	1.0	0.0	0.0	0.0	0.0	0.0	0.0
NFKB2	4791	symbol	H. sapiens	4791	H. sapiens	0.0	1.0	0.0	0.0	0.0	0.0	0.0	1.0	0.0	0.0	0.0	0.0	0.0	1.0	0.0	0.0	0.0	0.0	0.0	0.0
FAM102B	284611	symbol	H. sapiens	284611	H. sapiens	0.0	0.0	0.0	0.0	0.0	0.0	0.0	0.0	0.0	0.0	0.0	0.0	0.0	0.0	0.0	0.0	0.0	0.0	0.0	0.0
HELZ2	85441	symbol	H. sapiens	85441	H. sapiens	0.0	0.0	0.0	0.0	0.0	0.0	0.0	0.0	1.0	0.0	0.0	0.0	0.0	1.0	0.0	0.0	0.0	0.0	0.0	0.0
SCD	6319	symbol	H. sapiens	6319	H. sapiens	0.0	0.0	0.0	0.0	0.0	1.0	0.0	0.0	1.0	0.0	0.0	0.0	0.0	0.0	0.0	0.0	0.0	0.0	0.0	0.0
CXorf40B	541578	symbol	H. sapiens	541578	H. sapiens	0.0	0.0	0.0	0.0	0.0	0.0	0.0	0.0	0.0	0.0	0.0	0.0	0.0	0.0	0.0	0.0	0.0	0.0	0.0	0.0
GBP1	2633	symbol	H. sapiens	2633	H. sapiens	1.0	0.0	0.0	0.0	1.0	0.0	0.0	1.0	0.0	0.0	1.0	0.0	0.0	1.0	0.0	1.0	0.0	0.0	0.0	0.0
GBP3	2635	symbol	H. sapiens	2635	H. sapiens	1.0	0.0	0.0	0.0	0.0	0.0	0.0	0.0	0.0	0.0	0.0	0.0	0.0	1.0	0.0	0.0	0.0	0.0	0.0	0.0
DHCR24	1718	symbol	H. sapiens	1718	H. sapiens	0.0	0.0	0.0	0.0	0.0	0.0	0.0	0.0	1.0	0.0	0.0	1.0	0.0	0.0	0.0	0.0	0.0	0.0	1.0	0.0
ZNFX1	57169	symbol	H. sapiens	57169	H. sapiens	0.0	0.0	0.0	0.0	0.0	0.0	0.0	0.0	0.0	0.0	0.0	0.0	0.0	0.0	0.0	0.0	0.0	0.0	0.0	0.0
IFIT1	3434	symbol	H. sapiens	3434	H. sapiens	1.0	0.0	0.0	0.0	0.0	0.0	0.0	0.0	0.0	1.0	0.0	0.0	1.0	0.0	0.0	0.0	0.0	0.0	0.0	0.0
IFIT3	3437	symbol	H. sapiens	3437	H. sapiens	1.0	0.0	0.0	0.0	0.0	0.0	0.0	0.0	0.0	1.0	0.0	0.0	0.0	0.0	0.0	0.0	0.0	0.0	1.0	0.0
TSPAN1	10103	symbol	H. sapiens	10103	H. sapiens	0.0	0.0	0.0	0.0	0.0	0.0	0.0	0.0	0.0	0.0	0.0	0.0	0.0	0.0	0.0	0.0	0.0	0.0	0.0	0.0
YIPF3	25844	symbol	H. sapiens	25844	H. sapiens	0.0	0.0	0.0	0.0	0.0	0.0	0.0	0.0	0.0	0.0	0.0	0.0	0.0	0.0	0.0	0.0	0.0	0.0	0.0	0.0
SVBP	374969	symbol	H. sapiens	374969	H. sapiens	0.0	0.0	0.0	0.0	0.0	0.0	0.0	0.0	0.0	0.0	0.0	0.0	0.0	0.0	0.0	0.0	0.0	0.0	0.0	0.0
TCEAL1	9338	symbol	H. sapiens	9338	H. sapiens	0.0	0.0	0.0	0.0	0.0	0.0	0.0	0.0	0.0	0.0	0.0	0.0	0.0	0.0	0.0	0.0	0.0	0.0	0.0	0.0
BEX3	27018	symbol	H. sapiens	27018	H. sapiens	0.0	0.0	0.0	0.0	0.0	0.0	0.0	0.0	0.0	0.0	0.0	1.0	0.0	0.0	0.0	0.0	0.0	0.0	0.0	0.0
SYS1	90196	symbol	H. sapiens	90196	H. sapiens	0.0	0.0	0.0	0.0	0.0	0.0	0.0	0.0	0.0	0.0	0.0	0.0	0.0	0.0	0.0	0.0	0.0	0.0	0.0	0.0
ARMCX1	51309	symbol	H. sapiens	51309	H. sapiens	0.0	0.0	0.0	0.0	0.0	0.0	0.0	0.0	0.0	0.0	0.0	0.0	0.0	0.0	0.0	0.0	0.0	0.0	0.0	0.0
ZC3H12A	80149	symbol	H. sapiens	80149	H. sapiens	1.0	1.0	1.0	1.0	1.0	0.0	1.0	1.0	0.0	1.0	0.0	1.0	0.0	1.0	0.0	1.0	1.0	1.0	0.0	0.0
MAP7D1	55700	symbol	H. sapiens	55700	H. sapiens	0.0	0.0	0.0	0.0	0.0	0.0	0.0	0.0	0.0	0.0	0.0	0.0	0.0	0.0	0.0	0.0	0.0	0.0	0.0	0.0
LRSAM1	90678	symbol	H. sapiens	90678	H. sapiens	1.0	0.0	1.0	1.0	1.0	0.0	0.0	0.0	0.0	0.0	0.0	0.0	0.0	0.0	0.0	0.0	0.0	0.0	0.0	0.0
KIAA1522	57648	symbol	H. sapiens	57648	H. sapiens	0.0	0.0	0.0	0.0	0.0	0.0	0.0	0.0	0.0	0.0	0.0	0.0	0.0	0.0	0.0	0.0	0.0	0.0	0.0	0.0
EPB41	2035	symbol	H. sapiens	2035	H. sapiens	0.0	0.0	0.0	0.0	0.0	0.0	0.0	0.0	0.0	0.0	1.0	0.0	0.0	0.0	0.0	1.0	0.0	0.0	0.0	0.0
ROMO1	140823	symbol	H. sapiens	140823	H. sapiens	1.0	1.0	0.0	0.0	0.0	0.0	0.0	0.0	0.0	0.0	0.0	0.0	0.0	0.0	0.0	0.0	0.0	0.0	0.0	0.0
CNKSR1	10256	symbol	H. sapiens	10256	H. sapiens	0.0	0.0	0.0	0.0	0.0	0.0	0.0	0.0	0.0	0.0	0.0	0.0	1.0	0.0	0.0	0.0	0.0	0.0	0.0	0.0
HMGCL	3155	symbol	H. sapiens	3155	H. sapiens	0.0	0.0	0.0	0.0	0.0	0.0	0.0	0.0	0.0	0.0	0.0	0.0	0.0	1.0	0.0	0.0	0.0	0.0	0.0	0.0
OXLD1	339229	symbol	H. sapiens	339229	H. sapiens	0.0	0.0	0.0	0.0	0.0	0.0	0.0	0.0	0.0	0.0	0.0	0.0	0.0	0.0	0.0	0.0	0.0	0.0	0.0	0.0
PSMB9	5698	symbol	H. sapiens	5698	H. sapiens	1.0	1.0	1.0	0.0	1.0	1.0	0.0	0.0	0.0	0.0	0.0	1.0	0.0	1.0	0.0	0.0	0.0	0.0	0.0	0.0
PSMB8	5696	symbol	H. sapiens	5696	H. sapiens	1.0	1.0	1.0	0.0	1.0	1.0	0.0	0.0	0.0	0.0	0.0	1.0	0.0	1.0	0.0	0.0	0.0	0.0	0.0	0.0
TAP2	6891	symbol	H. sapiens	6891	H. sapiens	0.0	1.0	0.0	0.0	0.0	0.0	0.0	0.0	0.0	0.0	0.0	0.0	0.0	0.0	0.0	0.0	0.0	0.0	0.0	0.0
FBP1	2203	symbol	H. sapiens	2203	H. sapiens	0.0	0.0	0.0	0.0	0.0	1.0	0.0	0.0	0.0	0.0	1.0	0.0	0.0	1.0	0.0	0.0	0.0	0.0	0.0	0.0
NEU1	4758	symbol	H. sapiens	4758	H. sapiens	0.0	0.0	0.0	0.0	0.0	0.0	1.0	0.0	0.0	0.0	0.0	0.0	0.0	0.0	0.0	0.0	0.0	0.0	0.0	0.0
SYK	6850	symbol	H. sapiens	6850	H. sapiens	1.0	1.0	0.0	0.0	1.0	0.0	1.0	1.0	0.0	0.0	0.0	1.0	1.0	1.0	0.0	1.0	0.0	1.0	0.0	0.0
HLA-C	3107	symbol	H. sapiens	3107	H. sapiens	1.0	1.0	0.0	0.0	0.0	0.0	0.0	0.0	0.0	0.0	0.0	0.0	0.0	0.0	0.0	0.0	0.0	0.0	0.0	0.0
HLA-E	3133	symbol	H. sapiens	3133	H. sapiens	1.0	1.0	0.0	0.0	1.0	0.0	1.0	1.0	0.0	0.0	0.0	0.0	0.0	0.0	0.0	1.0	0.0	0.0	0.0	0.0
HLA-A	3105	symbol	H. sapiens	3105	H. sapiens	1.0	1.0	0.0	0.0	0.0	0.0	0.0	0.0	0.0	0.0	0.0	0.0	0.0	0.0	0.0	0.0	0.0	0.0	0.0	0.0
SNX5	27131	symbol	H. sapiens	27131	H. sapiens	0.0	0.0	1.0	1.0	0.0	0.0	0.0	0.0	0.0	0.0	0.0	0.0	1.0	0.0	0.0	0.0	0.0	0.0	0.0	0.0
CD74	972	symbol	H. sapiens	972	H. sapiens	1.0	1.0	0.0	0.0	0.0	1.0	1.0	1.0	1.0	1.0	0.0	1.0	0.0	0.0	0.0	1.0	1.0	1.0	0.0	1.0
SMARCE1	6605	symbol	H. sapiens	6605	H. sapiens	0.0	0.0	0.0	0.0	0.0	0.0	0.0	0.0	0.0	0.0	0.0	0.0	0.0	0.0	0.0	0.0	0.0	0.0	0.0	0.0
ITM2B	9445	symbol	H. sapiens	9445	H. sapiens	0.0	0.0	0.0	0.0	0.0	0.0	0.0	0.0	0.0	0.0	0.0	0.0	0.0	0.0	0.0	0.0	0.0	0.0	0.0	0.0
OPTN	10133	symbol	H. sapiens	10133	H. sapiens	1.0	0.0	1.0	1.0	1.0	0.0	0.0	0.0	0.0	0.0	0.0	0.0	0.0	1.0	0.0	0.0	1.0	0.0	0.0	0.0
ACAP3	116983	symbol	H. sapiens	116983	H. sapiens	0.0	0.0	0.0	0.0	0.0	0.0	0.0	0.0	0.0	0.0	1.0	0.0	0.0	0.0	0.0	0.0	0.0	0.0	0.0	0.0
POLA1	5422	symbol	H. sapiens	5422	H. sapiens	0.0	0.0	0.0	0.0	0.0	0.0	0.0	0.0	0.0	0.0	0.0	0.0	0.0	1.0	0.0	0.0	0.0	0.0	0.0	0.0
BAG1	573	symbol	H. sapiens	573	H. sapiens	0.0	0.0	0.0	0.0	0.0	0.0	0.0	0.0	0.0	0.0	0.0	0.0	0.0	0.0	0.0	0.0	0.0	1.0	0.0	0.0
APTX	54840	symbol	H. sapiens	54840	H. sapiens	0.0	0.0	0.0	0.0	0.0	0.0	0.0	0.0	0.0	0.0	0.0	0.0	0.0	0.0	0.0	0.0	0.0	0.0	0.0	0.0
U2AF1	7307	symbol	H. sapiens	7307	H. sapiens	0.0	0.0	0.0	0.0	0.0	0.0	0.0	0.0	0.0	0.0	0.0	0.0	0.0	0.0	0.0	0.0	0.0	0.0	0.0	0.0
RDH11	51109	symbol	H. sapiens	51109	H. sapiens	0.0	0.0	0.0	0.0	0.0	0.0	0.0	0.0	1.0	0.0	0.0	0.0	0.0	0.0	0.0	0.0	0.0	0.0	0.0	0.0
TSC2	7249	symbol	H. sapiens	7249	H. sapiens	0.0	0.0	1.0	1.0	0.0	0.0	0.0	0.0	0.0	0.0	0.0	0.0	1.0	1.0	0.0	0.0	0.0	0.0	1.0	0.0
FILIP1L	11259	symbol	H. sapiens	11259	H. sapiens	0.0	0.0	0.0	0.0	0.0	0.0	0.0	0.0	0.0	0.0	0.0	0.0	0.0	0.0	0.0	0.0	0.0	0.0	0.0	0.0
P4HTM	54681	symbol	H. sapiens	54681	H. sapiens	0.0	0.0	0.0	0.0	0.0	0.0	0.0	0.0	0.0	0.0	0.0	0.0	0.0	1.0	0.0	0.0	0.0	0.0	0.0	0.0
GPX3	2878	symbol	H. sapiens	2878	H. sapiens	0.0	0.0	0.0	0.0	0.0	0.0	0.0	0.0	0.0	0.0	0.0	0.0	0.0	0.0	0.0	0.0	0.0	0.0	0.0	0.0
TRIP12	9320	symbol	H. sapiens	9320	H. sapiens	0.0	0.0	1.0	0.0	0.0	0.0	0.0	0.0	0.0	0.0	0.0	0.0	0.0	0.0	0.0	0.0	0.0	1.0	0.0	0.0
SRP19	6728	symbol	H. sapiens	6728	H. sapiens	0.0	0.0	0.0	0.0	0.0	0.0	0.0	0.0	0.0	0.0	0.0	0.0	0.0	0.0	0.0	0.0	0.0	0.0	0.0	0.0
OAS2	4939	symbol	H. sapiens	4939	H. sapiens	1.0	0.0	0.0	0.0	0.0	0.0	0.0	0.0	0.0	0.0	0.0	0.0	0.0	1.0	1.0	0.0	0.0	0.0	0.0	0.0
FAM50A	9130	symbol	H. sapiens	9130	H. sapiens	0.0	0.0	0.0	0.0	0.0	0.0	0.0	0.0	0.0	0.0	0.0	0.0	0.0	0.0	0.0	0.0	0.0	0.0	0.0	0.0
CHMP3	51652	symbol	H. sapiens	51652	H. sapiens	1.0	0.0	0.0	1.0	0.0	0.0	0.0	0.0	0.0	1.0	0.0	0.0	0.0	1.0	0.0	1.0	0.0	0.0	0.0	0.0
PPP3CA	5530	symbol	H. sapiens	5530	H. sapiens	0.0	0.0	0.0	0.0	1.0	0.0	0.0	0.0	0.0	0.0	1.0	0.0	0.0	1.0	0.0	1.0	0.0	0.0	0.0	0.0
QPRT	23475	symbol	H. sapiens	23475	H. sapiens	0.0	0.0	0.0	0.0	0.0	0.0	0.0	0.0	0.0	0.0	0.0	0.0	0.0	1.0	0.0	0.0	0.0	0.0	0.0	0.0
MGST1	4257	symbol	H. sapiens	4257	H. sapiens	0.0	0.0	0.0	0.0	0.0	0.0	1.0	0.0	1.0	0.0	0.0	0.0	0.0	0.0	0.0	0.0	0.0	0.0	0.0	0.0
TAX1BP1	8887	symbol	H. sapiens	8887	H. sapiens	1.0	0.0	0.0	0.0	0.0	0.0	0.0	1.0	0.0	0.0	0.0	0.0	0.0	1.0	0.0	0.0	0.0	0.0	0.0	0.0
MYD88	4615	symbol	H. sapiens	4615	H. sapiens	1.0	0.0	0.0	0.0	1.0	0.0	0.0	1.0	0.0	0.0	0.0	0.0	0.0	1.0	0.0	0.0	1.0	0.0	0.0	0.0
ATP6V1H	51606	symbol	H. sapiens	51606	H. sapiens	0.0	0.0	0.0	1.0	0.0	0.0	0.0	0.0	0.0	0.0	0.0	0.0	1.0	0.0	0.0	0.0	0.0	0.0	0.0	0.0
IRF9	10379	symbol	H. sapiens	10379	H. sapiens	1.0	0.0	0.0	0.0	0.0	0.0	0.0	0.0	0.0	0.0	0.0	0.0	0.0	0.0	0.0	0.0	0.0	0.0	0.0	0.0
GPER1	2852	symbol	H. sapiens	2852	H. sapiens	0.0	0.0	0.0	0.0	0.0	1.0	0.0	0.0	1.0	0.0	1.0	1.0	1.0	1.0	0.0	1.0	0.0	0.0	1.0	0.0
C1QTNF6	114904	symbol	H. sapiens	114904	H. sapiens	0.0	0.0	0.0	0.0	0.0	0.0	0.0	0.0	0.0	0.0	0.0	0.0	0.0	0.0	0.0	0.0	0.0	0.0	0.0	0.0
PRMT2	3275	symbol	H. sapiens	3275	H. sapiens	0.0	0.0	0.0	0.0	0.0	0.0	0.0	0.0	0.0	0.0	1.0	1.0	1.0	1.0	0.0	0.0	0.0	0.0	0.0	0.0
LSS	4047	symbol	H. sapiens	4047	H. sapiens	0.0	0.0	0.0	0.0	0.0	1.0	0.0	0.0	1.0	0.0	0.0	0.0	0.0	0.0	0.0	0.0	0.0	0.0	0.0	0.0
CYB5A	1528	symbol	H. sapiens	1528	H. sapiens	0.0	0.0	0.0	0.0	0.0	0.0	0.0	0.0	0.0	0.0	0.0	0.0	0.0	0.0	0.0	0.0	0.0	0.0	0.0	0.0
MX1	4599	symbol	H. sapiens	4599	H. sapiens	1.0	0.0	0.0	0.0	0.0	0.0	0.0	0.0	0.0	0.0	0.0	0.0	0.0	0.0	0.0	0.0	0.0	0.0	0.0	0.0
IFITM3	10410	symbol	H. sapiens	10410	H. sapiens	1.0	0.0	0.0	0.0	0.0	0.0	0.0	0.0	0.0	1.0	0.0	0.0	0.0	0.0	0.0	0.0	0.0	0.0	0.0	0.0
IFITM2	10581	symbol	H. sapiens	10581	H. sapiens	1.0	0.0	0.0	0.0	0.0	0.0	0.0	0.0	0.0	1.0	0.0	0.0	0.0	0.0	0.0	0.0	0.0	0.0	0.0	0.0
LZIC	84328	symbol	H. sapiens	84328	H. sapiens	0.0	0.0	0.0	0.0	0.0	0.0	0.0	0.0	0.0	0.0	0.0	0.0	0.0	0.0	0.0	0.0	0.0	0.0	0.0	0.0
ROCK2	9475	symbol	H. sapiens	9475	H. sapiens	1.0	0.0	1.0	0.0	0.0	0.0	0.0	1.0	0.0	0.0	1.0	1.0	1.0	1.0	0.0	1.0	1.0	1.0	0.0	0.0
H3C15	333932	symbol	H. sapiens	333932	H. sapiens	1.0	0.0	0.0	0.0	0.0	0.0	0.0	0.0	0.0	0.0	0.0	0.0	0.0	0.0	0.0	0.0	0.0	0.0	0.0	0.0
RAMP1	10267	symbol	H. sapiens	10267	H. sapiens	0.0	0.0	0.0	0.0	0.0	0.0	0.0	0.0	0.0	0.0	0.0	0.0	1.0	0.0	0.0	0.0	0.0	0.0	0.0	0.0
YY1AP1	55249	symbol	H. sapiens	55249	H. sapiens	0.0	0.0	0.0	0.0	0.0	0.0	0.0	0.0	0.0	0.0	0.0	0.0	0.0	0.0	0.0	0.0	0.0	0.0	0.0	0.0
CLU	1191	symbol	H. sapiens	1191	H. sapiens	1.0	1.0	1.0	1.0	1.0	0.0	1.0	1.0	0.0	0.0	0.0	1.0	0.0	0.0	0.0	0.0	0.0	1.0	0.0	0.0
IFI30	10437	symbol	H. sapiens	10437	H. sapiens	1.0	1.0	0.0	0.0	0.0	0.0	0.0	0.0	0.0	0.0	0.0	0.0	0.0	0.0	0.0	0.0	0.0	0.0	0.0	1.0
IFITM1	8519	symbol	H. sapiens	8519	H. sapiens	1.0	0.0	0.0	0.0	0.0	0.0	0.0	0.0	0.0	1.0	0.0	0.0	0.0	0.0	0.0	0.0	0.0	0.0	1.0	0.0
KYNU	8942	symbol	H. sapiens	8942	H. sapiens	1.0	0.0	0.0	0.0	0.0	1.0	0.0	0.0	0.0	0.0	0.0	0.0	0.0	1.0	0.0	0.0	0.0	0.0	0.0	0.0
STK16	8576	symbol	H. sapiens	8576	H. sapiens	0.0	0.0	0.0	0.0	0.0	0.0	0.0	0.0	0.0	0.0	0.0	0.0	0.0	0.0	0.0	0.0	0.0	0.0	0.0	0.0
UAP1L1	91373	symbol	H. sapiens	91373	H. sapiens	0.0	0.0	0.0	0.0	0.0	0.0	0.0	0.0	0.0	0.0	0.0	0.0	0.0	0.0	0.0	0.0	0.0	0.0	0.0	0.0
SEMA3C	10512	symbol	H. sapiens	10512	H. sapiens	0.0	0.0	0.0	0.0	0.0	0.0	0.0	0.0	0.0	0.0	1.0	0.0	0.0	1.0	0.0	0.0	0.0	0.0	0.0	0.0
HLA-B	3106	symbol	H. sapiens	3106	H. sapiens	1.0	1.0	0.0	0.0	0.0	0.0	0.0	0.0	0.0	0.0	0.0	0.0	0.0	0.0	0.0	0.0	0.0	0.0	0.0	0.0
TRAFD1	10906	symbol	H. sapiens	10906	H. sapiens	0.0	0.0	0.0	0.0	1.0	0.0	0.0	0.0	0.0	0.0	0.0	0.0	0.0	0.0	0.0	0.0	0.0	0.0	0.0	0.0
COMT	1312	symbol	H. sapiens	1312	H. sapiens	0.0	0.0	0.0	0.0	0.0	1.0	0.0	0.0	1.0	0.0	0.0	0.0	0.0	1.0	0.0	0.0	0.0	0.0	1.0	0.0
ZDHHC20	253832	symbol	H. sapiens	253832	H. sapiens	0.0	0.0	0.0	0.0	0.0	0.0	0.0	0.0	0.0	0.0	0.0	0.0	0.0	0.0	0.0	0.0	0.0	0.0	0.0	0.0
IFI35	3430	symbol	H. sapiens	3430	H. sapiens	1.0	0.0	0.0	0.0	0.0	0.0	0.0	0.0	0.0	0.0	0.0	0.0	0.0	0.0	0.0	0.0	0.0	0.0	0.0	0.0
HIGD1A	25994	symbol	H. sapiens	25994	H. sapiens	0.0	0.0	0.0	0.0	0.0	0.0	0.0	0.0	0.0	0.0	0.0	1.0	0.0	1.0	0.0	0.0	0.0	1.0	0.0	0.0
APOD	347	symbol	H. sapiens	347	H. sapiens	0.0	0.0	0.0	0.0	0.0	0.0	0.0	1.0	1.0	0.0	1.0	0.0	1.0	0.0	0.0	1.0	0.0	0.0	1.0	0.0
MORF4L2	9643	symbol	H. sapiens	9643	H. sapiens	0.0	0.0	0.0	0.0	0.0	0.0	0.0	0.0	0.0	0.0	1.0	0.0	0.0	0.0	0.0	0.0	0.0	0.0	0.0	0.0
SEC23B	10483	symbol	H. sapiens	10483	H. sapiens	0.0	0.0	0.0	0.0	0.0	0.0	0.0	0.0	0.0	0.0	0.0	0.0	0.0	0.0	0.0	0.0	0.0	0.0	0.0	0.0
HID1	283987	symbol	H. sapiens	283987	H. sapiens	0.0	0.0	0.0	0.0	0.0	0.0	0.0	0.0	0.0	0.0	0.0	0.0	0.0	0.0	0.0	0.0	0.0	0.0	0.0	0.0
CFB	629	symbol	H. sapiens	629	H. sapiens	0.0	0.0	0.0	0.0	1.0	0.0	0.0	0.0	0.0	0.0	0.0	0.0	0.0	0.0	0.0	0.0	0.0	0.0	0.0	0.0
SHISA5	51246	symbol	H. sapiens	51246	H. sapiens	0.0	0.0	0.0	0.0	0.0	0.0	0.0	0.0	0.0	0.0	0.0	1.0	0.0	1.0	0.0	0.0	1.0	0.0	0.0	0.0
DDX39B	7919	symbol	H. sapiens	7919	H. sapiens	0.0	0.0	0.0	0.0	0.0	0.0	0.0	0.0	0.0	1.0	1.0	0.0	0.0	0.0	0.0	0.0	0.0	1.0	0.0	0.0
AC068580.4						nan	nan	nan	nan	nan	nan	nan	nan	nan	nan	nan	nan	nan	nan	nan	nan	nan	nan	nan	nan
RPL36A	6173	symbol	H. sapiens	6173	H. sapiens	0.0	0.0	0.0	0.0	0.0	0.0	0.0	0.0	0.0	0.0	0.0	0.0	0.0	1.0	0.0	0.0	0.0	0.0	0.0	0.0
MORC2	22880	symbol	H. sapiens	22880	H. sapiens	1.0	0.0	0.0	0.0	0.0	0.0	0.0	0.0	0.0	0.0	0.0	0.0	0.0	0.0	0.0	0.0	0.0	0.0	0.0	0.0
AL671277.1						nan	nan	nan	nan	nan	nan	nan	nan	nan	nan	nan	nan	nan	nan	nan	nan	nan	nan	nan	nan
ATG9A	79065	symbol	H. sapiens	79065	H. sapiens	0.0	0.0	0.0	1.0	0.0	0.0	0.0	0.0	0.0	0.0	0.0	0.0	0.0	0.0	0.0	0.0	0.0	0.0	0.0	0.0
MYO6	4646	symbol	H. sapiens	4646	H. sapiens	0.0	0.0	0.0	0.0	0.0	0.0	0.0	0.0	0.0	0.0	0.0	0.0	0.0	0.0	0.0	0.0	0.0	0.0	0.0	0.0
CPNE1	8904	symbol	H. sapiens	8904	H. sapiens	1.0	0.0	0.0	0.0	0.0	0.0	1.0	0.0	1.0	0.0	1.0	0.0	0.0	1.0	0.0	0.0	1.0	0.0	0.0	0.0
TAPBP	6892	symbol	H. sapiens	6892	H. sapiens	0.0	1.0	0.0	0.0	0.0	0.0	0.0	0.0	0.0	0.0	0.0	0.0	0.0	0.0	0.0	0.0	0.0	0.0	0.0	0.0
OSR2	116039	symbol	H. sapiens	116039	H. sapiens	0.0	0.0	0.0	0.0	0.0	0.0	0.0	0.0	0.0	0.0	0.0	0.0	0.0	0.0	0.0	0.0	0.0	0.0	0.0	0.0
TRIM26	7726	symbol	H. sapiens	7726	H. sapiens	1.0	0.0	0.0	0.0	0.0	0.0	0.0	0.0	0.0	1.0	0.0	0.0	0.0	0.0	0.0	0.0	0.0	0.0	0.0	0.0
PSPH	5723	symbol	H. sapiens	5723	H. sapiens	0.0	0.0	0.0	0.0	0.0	0.0	0.0	0.0	0.0	0.0	0.0	0.0	0.0	1.0	0.0	0.0	0.0	0.0	0.0	0.0
DEPDC5	9681	symbol	H. sapiens	9681	H. sapiens	0.0	0.0	0.0	0.0	0.0	0.0	0.0	0.0	0.0	0.0	0.0	0.0	0.0	0.0	0.0	0.0	0.0	0.0	0.0	0.0
IRF1	3659	symbol	H. sapiens	3659	H. sapiens	1.0	1.0	0.0	0.0	1.0	0.0	0.0	1.0	0.0	1.0	0.0	0.0	0.0	0.0	0.0	0.0	0.0	0.0	1.0	0.0
MBOAT7	79143	symbol	H. sapiens	79143	H. sapiens	0.0	0.0	0.0	0.0	0.0	0.0	0.0	0.0	1.0	0.0	0.0	0.0	0.0	0.0	0.0	0.0	0.0	0.0	0.0	0.0
SMAD3	4088	symbol	H. sapiens	4088	H. sapiens	0.0	0.0	1.0	0.0	0.0	0.0	0.0	1.0	0.0	1.0	1.0	1.0	0.0	1.0	0.0	1.0	0.0	0.0	1.0	0.0
FGD5-AS1	100505641	symbol	H. sapiens	100505641	H. sapiens	0.0	0.0	0.0	0.0	0.0	0.0	0.0	0.0	0.0	0.0	0.0	0.0	0.0	0.0	0.0	0.0	0.0	0.0	0.0	0.0
P4HA1	5033	symbol	H. sapiens	5033	H. sapiens	0.0	0.0	0.0	0.0	0.0	0.0	0.0	0.0	0.0	0.0	0.0	0.0	0.0	1.0	0.0	0.0	0.0	0.0	0.0	0.0
LINC01006	100506380	symbol	H. sapiens	100506380	H. sapiens	0.0	0.0	0.0	0.0	0.0	0.0	0.0	0.0	0.0	0.0	0.0	0.0	0.0	0.0	0.0	0.0	0.0	0.0	0.0	0.0
ABCF2	10061	symbol	H. sapiens	10061	H. sapiens	0.0	0.0	0.0	0.0	0.0	0.0	0.0	0.0	0.0	0.0	0.0	0.0	0.0	0.0	0.0	0.0	0.0	0.0	0.0	0.0
ATIC	471	symbol	H. sapiens	471	H. sapiens	0.0	0.0	0.0	0.0	0.0	0.0	0.0	0.0	0.0	0.0	0.0	0.0	0.0	0.0	0.0	0.0	0.0	0.0	0.0	0.0
CRY2	1408	symbol	H. sapiens	1408	H. sapiens	0.0	0.0	0.0	0.0	0.0	0.0	0.0	0.0	0.0	0.0	0.0	0.0	1.0	0.0	0.0	0.0	0.0	0.0	0.0	0.0
ANO10	55129	symbol	H. sapiens	55129	H. sapiens	0.0	0.0	0.0	0.0	0.0	0.0	0.0	0.0	0.0	0.0	0.0	0.0	0.0	0.0	0.0	0.0	0.0	0.0	0.0	0.0
KCNK2	3776	symbol	H. sapiens	3776	H. sapiens	0.0	0.0	0.0	0.0	0.0	0.0	0.0	0.0	0.0	0.0	1.0	1.0	0.0	1.0	0.0	0.0	0.0	1.0	1.0	0.0
SDCBP	6386	symbol	H. sapiens	6386	H. sapiens	0.0	0.0	1.0	0.0	0.0	0.0	1.0	0.0	0.0	0.0	1.0	0.0	1.0	1.0	0.0	0.0	0.0	1.0	0.0	0.0
GDI1	2664	symbol	H. sapiens	2664	H. sapiens	0.0	0.0	0.0	0.0	0.0	0.0	0.0	0.0	0.0	0.0	1.0	0.0	0.0	0.0	0.0	1.0	0.0	0.0	0.0	0.0
CTSS	1520	symbol	H. sapiens	1520	H. sapiens	0.0	1.0	1.0	0.0	1.0	0.0	1.0	0.0	0.0	0.0	0.0	0.0	1.0	0.0	0.0	0.0	0.0	0.0	0.0	1.0
PLSCR1	5359	symbol	H. sapiens	5359	H. sapiens	1.0	0.0	0.0	0.0	1.0	0.0	1.0	0.0	1.0	1.0	0.0	0.0	0.0	1.0	0.0	0.0	0.0	0.0	0.0	0.0
GSN	2934	symbol	H. sapiens	2934	H. sapiens	1.0	0.0	0.0	0.0	0.0	0.0	1.0	0.0	0.0	1.0	1.0	1.0	0.0	0.0	0.0	1.0	0.0	0.0	0.0	0.0
CDS2	8760	symbol	H. sapiens	8760	H. sapiens	0.0	0.0	0.0	0.0	0.0	0.0	0.0	0.0	1.0	0.0	0.0	0.0	0.0	0.0	0.0	0.0	0.0	0.0	0.0	0.0
TSSC4	10078	symbol	H. sapiens	10078	H. sapiens	0.0	0.0	0.0	0.0	0.0	0.0	0.0	0.0	0.0	0.0	0.0	0.0	0.0	0.0	0.0	0.0	0.0	0.0	0.0	0.0
DDR1	780	symbol	H. sapiens	780	H. sapiens	0.0	0.0	0.0	0.0	0.0	0.0	0.0	0.0	0.0	0.0	1.0	0.0	1.0	1.0	0.0	0.0	0.0	0.0	1.0	0.0
SCARB2	950	symbol	H. sapiens	950	H. sapiens	1.0	0.0	0.0	0.0	0.0	0.0	0.0	0.0	0.0	1.0	1.0	0.0	0.0	0.0	0.0	0.0	0.0	0.0	0.0	0.0
TBC1D7	51256	symbol	H. sapiens	51256	H. sapiens	0.0	0.0	0.0	0.0	0.0	0.0	0.0	0.0	0.0	0.0	1.0	0.0	0.0	0.0	0.0	0.0	0.0	0.0	0.0	0.0
AC009961.1						nan	nan	nan	nan	nan	nan	nan	nan	nan	nan	nan	nan	nan	nan	nan	nan	nan	nan	nan	nan
PSME2P2	338099	symbol	H. sapiens	338099	H. sapiens	0.0	0.0	0.0	0.0	0.0	0.0	0.0	0.0	0.0	0.0	0.0	0.0	0.0	0.0	0.0	0.0	0.0	0.0	0.0	0.0
ARL6IP4	51329	symbol	H. sapiens	51329	H. sapiens	0.0	0.0	0.0	0.0	0.0	0.0	0.0	0.0	0.0	0.0	0.0	0.0	0.0	0.0	0.0	0.0	0.0	0.0	0.0	0.0
ARL6IP6	151188	symbol	H. sapiens	151188	H. sapiens	0.0	0.0	0.0	0.0	0.0	0.0	0.0	0.0	0.0	0.0	0.0	0.0	0.0	0.0	0.0	0.0	0.0	0.0	0.0	0.0
CEPT1	10390	symbol	H. sapiens	10390	H. sapiens	0.0	0.0	0.0	0.0	0.0	0.0	0.0	0.0	1.0	0.0	0.0	0.0	0.0	0.0	0.0	0.0	0.0	0.0	0.0	0.0
RAB6B	51560	symbol	H. sapiens	51560	H. sapiens	0.0	0.0	0.0	0.0	0.0	0.0	0.0	0.0	0.0	0.0	0.0	0.0	0.0	0.0	0.0	0.0	0.0	0.0	0.0	0.0
POR	5447	symbol	H. sapiens	5447	H. sapiens	0.0	0.0	0.0	0.0	0.0	1.0	0.0	0.0	1.0	0.0	1.0	1.0	1.0	1.0	0.0	0.0	0.0	0.0	0.0	0.0
RN7SL181P	106480492	symbol	H. sapiens	106480492	H. sapiens	0.0	0.0	0.0	0.0	0.0	0.0	0.0	0.0	0.0	0.0	0.0	0.0	0.0	0.0	0.0	0.0	0.0	0.0	0.0	0.0
AOPEP	84909	symbol	H. sapiens	84909	H. sapiens	0.0	0.0	0.0	0.0	0.0	0.0	0.0	0.0	0.0	0.0	0.0	0.0	0.0	0.0	0.0	0.0	0.0	0.0	0.0	0.0
P3H1	64175	symbol	H. sapiens	64175	H. sapiens	0.0	0.0	0.0	0.0	0.0	0.0	0.0	0.0	0.0	0.0	1.0	0.0	0.0	1.0	0.0	1.0	0.0	0.0	1.0	0.0
TRANK1	9881	symbol	H. sapiens	9881	H. sapiens	0.0	0.0	0.0	0.0	0.0	0.0	0.0	0.0	0.0	0.0	0.0	0.0	0.0	0.0	0.0	0.0	0.0	0.0	0.0	0.0
PCMT1	5110	symbol	H. sapiens	5110	H. sapiens	0.0	0.0	0.0	0.0	0.0	0.0	0.0	0.0	0.0	0.0	0.0	0.0	0.0	0.0	0.0	0.0	0.0	0.0	0.0	0.0
PAPSS2	9060	symbol	H. sapiens	9060	H. sapiens	0.0	0.0	0.0	0.0	0.0	0.0	0.0	0.0	0.0	0.0	0.0	0.0	0.0	0.0	0.0	0.0	0.0	0.0	0.0	0.0
ARHGAP19	84986	symbol	H. sapiens	84986	H. sapiens	0.0	0.0	0.0	0.0	0.0	0.0	0.0	0.0	0.0	0.0	0.0	0.0	0.0	0.0	0.0	0.0	0.0	0.0	0.0	0.0
LGALS9	3965	symbol	H. sapiens	3965	H. sapiens	1.0	1.0	0.0	0.0	1.0	0.0	1.0	1.0	0.0	1.0	0.0	1.0	0.0	1.0	0.0	1.0	1.0	1.0	1.0	0.0
ARIH2	10425	symbol	H. sapiens	10425	H. sapiens	0.0	0.0	1.0	0.0	0.0	0.0	0.0	0.0	0.0	0.0	1.0	1.0	0.0	0.0	0.0	1.0	0.0	0.0	0.0	0.0
DNAJC5	80331	symbol	H. sapiens	80331	H. sapiens	0.0	0.0	0.0	0.0	0.0	0.0	1.0	0.0	0.0	0.0	0.0	0.0	0.0	0.0	0.0	0.0	0.0	0.0	0.0	0.0
MDM4	4194	symbol	H. sapiens	4194	H. sapiens	0.0	0.0	1.0	0.0	0.0	0.0	0.0	0.0	0.0	0.0	0.0	0.0	0.0	1.0	0.0	0.0	0.0	0.0	1.0	0.0
PARP9	83666	symbol	H. sapiens	83666	H. sapiens	1.0	0.0	0.0	0.0	1.0	0.0	0.0	0.0	0.0	0.0	0.0	0.0	0.0	0.0	0.0	1.0	0.0	1.0	0.0	0.0
GGPS1	9453	symbol	H. sapiens	9453	H. sapiens	0.0	0.0	0.0	0.0	0.0	1.0	0.0	0.0	1.0	0.0	0.0	0.0	0.0	0.0	0.0	0.0	0.0	0.0	0.0	0.0
DNAJB2	3300	symbol	H. sapiens	3300	H. sapiens	0.0	0.0	1.0	0.0	0.0	0.0	0.0	0.0	0.0	0.0	1.0	1.0	0.0	0.0	0.0	0.0	0.0	0.0	1.0	0.0
MAPK3	5595	symbol	H. sapiens	5595	H. sapiens	1.0	1.0	1.0	1.0	1.0	0.0	0.0	1.0	0.0	0.0	1.0	1.0	1.0	1.0	0.0	1.0	0.0	1.0	0.0	0.0
REEP5	7905	symbol	H. sapiens	7905	H. sapiens	0.0	0.0	0.0	0.0	0.0	0.0	0.0	0.0	0.0	0.0	0.0	0.0	0.0	0.0	0.0	0.0	0.0	0.0	0.0	0.0
PARP14	54625	symbol	H. sapiens	54625	H. sapiens	1.0	0.0	0.0	0.0	1.0	0.0	0.0	0.0	0.0	0.0	0.0	0.0	0.0	0.0	0.0	0.0	0.0	0.0	0.0	0.0
IMP4	92856	symbol	H. sapiens	92856	H. sapiens	0.0	0.0	0.0	0.0	0.0	0.0	0.0	0.0	0.0	0.0	0.0	0.0	0.0	0.0	0.0	0.0	0.0	0.0	0.0	0.0
RBCK1	10616	symbol	H. sapiens	10616	H. sapiens	1.0	0.0	1.0	0.0	1.0	0.0	0.0	0.0	0.0	0.0	0.0	1.0	0.0	1.0	0.0	0.0	1.0	0.0	0.0	0.0
AZI2	64343	symbol	H. sapiens	64343	H. sapiens	0.0	0.0	0.0	0.0	0.0	0.0	0.0	1.0	0.0	0.0	0.0	0.0	0.0	0.0	0.0	0.0	1.0	0.0	0.0	0.0
SLMAP	7871	symbol	H. sapiens	7871	H. sapiens	0.0	0.0	0.0	0.0	0.0	0.0	0.0	0.0	0.0	0.0	0.0	0.0	0.0	0.0	0.0	0.0	0.0	0.0	0.0	0.0
CCNL1	57018	symbol	H. sapiens	57018	H. sapiens	0.0	0.0	0.0	0.0	0.0	0.0	0.0	0.0	0.0	0.0	0.0	0.0	0.0	0.0	0.0	0.0	0.0	0.0	0.0	0.0
IFI44L	10964	symbol	H. sapiens	10964	H. sapiens	1.0	0.0	0.0	0.0	0.0	0.0	0.0	0.0	0.0	0.0	0.0	0.0	0.0	0.0	0.0	0.0	0.0	0.0	0.0	0.0
HRAS	3265	symbol	H. sapiens	3265	H. sapiens	1.0	1.0	0.0	0.0	1.0	0.0	0.0	1.0	0.0	0.0	1.0	1.0	1.0	1.0	0.0	1.0	0.0	1.0	1.0	0.0
RPS6KA3	6197	symbol	H. sapiens	6197	H. sapiens	0.0	0.0	0.0	0.0	1.0	0.0	0.0	0.0	0.0	0.0	1.0	1.0	0.0	1.0	0.0	0.0	0.0	0.0	0.0	0.0
CRYZL1	9946	symbol	H. sapiens	9946	H. sapiens	0.0	0.0	0.0	0.0	0.0	1.0	0.0	0.0	0.0	0.0	0.0	0.0	0.0	0.0	0.0	0.0	0.0	0.0	0.0	0.0
ACSS2	55902	symbol	H. sapiens	55902	H. sapiens	0.0	0.0	0.0	0.0	0.0	0.0	0.0	0.0	1.0	0.0	0.0	0.0	0.0	0.0	0.0	0.0	0.0	0.0	0.0	0.0
GATA3	2625	symbol	H. sapiens	2625	H. sapiens	1.0	1.0	0.0	0.0	1.0	0.0	1.0	1.0	1.0	1.0	1.0	0.0	1.0	1.0	0.0	1.0	0.0	0.0	1.0	0.0
CCZ1B	221960	symbol	H. sapiens	221960	H. sapiens	0.0	0.0	0.0	0.0	0.0	0.0	0.0	0.0	0.0	0.0	0.0	0.0	0.0	0.0	0.0	0.0	0.0	0.0	0.0	0.0
CTSL	1514	symbol	H. sapiens	1514	H. sapiens	0.0	1.0	1.0	0.0	1.0	0.0	0.0	0.0	0.0	0.0	0.0	0.0	1.0	0.0	0.0	0.0	0.0	0.0	0.0	1.0
PCNT	5116	symbol	H. sapiens	5116	H. sapiens	0.0	0.0	0.0	0.0	0.0	0.0	0.0	0.0	0.0	0.0	0.0	0.0	0.0	1.0	0.0	1.0	0.0	0.0	0.0	0.0
REPIN1	29803	symbol	H. sapiens	29803	H. sapiens	0.0	0.0	0.0	0.0	0.0	0.0	0.0	0.0	0.0	0.0	0.0	0.0	0.0	0.0	0.0	0.0	0.0	0.0	0.0	0.0
PRKCI	5584	symbol	H. sapiens	5584	H. sapiens	0.0	0.0	0.0	0.0	0.0	0.0	0.0	0.0	0.0	0.0	1.0	1.0	1.0	1.0	0.0	1.0	0.0	0.0	0.0	0.0
NCK1	4690	symbol	H. sapiens	4690	H. sapiens	0.0	0.0	0.0	0.0	1.0	0.0	0.0	0.0	0.0	0.0	1.0	1.0	1.0	1.0	0.0	0.0	0.0	1.0	0.0	0.0
NCAM2	4685	symbol	H. sapiens	4685	H. sapiens	0.0	0.0	0.0	0.0	0.0	0.0	0.0	0.0	0.0	0.0	1.0	0.0	0.0	0.0	0.0	0.0	0.0	0.0	0.0	0.0
NIT1	4817	symbol	H. sapiens	4817	H. sapiens	0.0	0.0	0.0	0.0	0.0	0.0	0.0	0.0	0.0	0.0	0.0	0.0	0.0	0.0	0.0	0.0	0.0	0.0	0.0	0.0
CLASP2	23122	symbol	H. sapiens	23122	H. sapiens	0.0	0.0	0.0	0.0	0.0	0.0	0.0	0.0	0.0	0.0	0.0	0.0	0.0	1.0	0.0	0.0	0.0	0.0	0.0	0.0
IAH1	285148	symbol	H. sapiens	285148	H. sapiens	0.0	0.0	0.0	0.0	0.0	0.0	0.0	0.0	0.0	0.0	0.0	0.0	0.0	0.0	0.0	0.0	0.0	0.0	0.0	0.0
MTO1	25821	symbol	H. sapiens	25821	H. sapiens	0.0	0.0	0.0	0.0	0.0	0.0	0.0	0.0	0.0	0.0	0.0	0.0	0.0	0.0	0.0	0.0	0.0	0.0	0.0	0.0
CDC42SE1	56882	symbol	H. sapiens	56882	H. sapiens	0.0	0.0	0.0	0.0	0.0	0.0	0.0	0.0	0.0	0.0	1.0	0.0	0.0	0.0	0.0	0.0	0.0	0.0	0.0	0.0
PSMD6	9861	symbol	H. sapiens	9861	H. sapiens	1.0	1.0	1.0	0.0	1.0	1.0	1.0	0.0	0.0	0.0	0.0	0.0	0.0	1.0	0.0	0.0	0.0	0.0	0.0	0.0
FAM107B	83641	symbol	H. sapiens	83641	H. sapiens	0.0	0.0	0.0	0.0	0.0	0.0	0.0	0.0	0.0	0.0	0.0	0.0	0.0	0.0	0.0	0.0	0.0	0.0	0.0	0.0
ELOB	6923	symbol	H. sapiens	6923	H. sapiens	0.0	0.0	0.0	0.0	0.0	0.0	0.0	0.0	0.0	0.0	0.0	0.0	0.0	1.0	0.0	0.0	0.0	0.0	0.0	0.0
TIA1	7072	symbol	H. sapiens	7072	H. sapiens	0.0	0.0	0.0	0.0	0.0	0.0	0.0	1.0	0.0	0.0	0.0	1.0	1.0	1.0	0.0	0.0	0.0	0.0	0.0	0.0
PBX1	5087	symbol	H. sapiens	5087	H. sapiens	0.0	0.0	0.0	0.0	0.0	0.0	0.0	0.0	1.0	0.0	1.0	0.0	0.0	1.0	0.0	0.0	0.0	0.0	0.0	0.0
BMI1	648	symbol	H. sapiens	648	H. sapiens	0.0	0.0	0.0	0.0	0.0	0.0	0.0	0.0	0.0	0.0	0.0	0.0	0.0	1.0	0.0	0.0	0.0	0.0	0.0	0.0
TMEM39A	55254	symbol	H. sapiens	55254	H. sapiens	0.0	0.0	0.0	0.0	0.0	0.0	0.0	0.0	0.0	0.0	0.0	0.0	0.0	0.0	0.0	0.0	0.0	0.0	0.0	0.0
ZBTB8OS	339487	symbol	H. sapiens	339487	H. sapiens	0.0	0.0	0.0	0.0	0.0	0.0	0.0	0.0	0.0	0.0	0.0	0.0	0.0	0.0	0.0	0.0	0.0	0.0	0.0	0.0
CDK10	8558	symbol	H. sapiens	8558	H. sapiens	0.0	0.0	0.0	0.0	0.0	0.0	0.0	0.0	0.0	0.0	1.0	0.0	0.0	1.0	0.0	0.0	0.0	0.0	1.0	0.0
APBB2	323	symbol	H. sapiens	323	H. sapiens	0.0	0.0	0.0	0.0	0.0	0.0	0.0	0.0	0.0	0.0	1.0	1.0	0.0	0.0	0.0	0.0	0.0	0.0	0.0	0.0
EPN3	55040	symbol	H. sapiens	55040	H. sapiens	0.0	0.0	0.0	0.0	0.0	0.0	0.0	0.0	0.0	0.0	0.0	0.0	0.0	0.0	0.0	0.0	0.0	0.0	0.0	0.0
ATP2C1	27032	symbol	H. sapiens	27032	H. sapiens	0.0	0.0	0.0	0.0	0.0	0.0	0.0	0.0	0.0	0.0	0.0	0.0	0.0	0.0	0.0	0.0	1.0	0.0	0.0	0.0
POLR2J3	548644	symbol	H. sapiens	548644	H. sapiens	0.0	0.0	0.0	0.0	0.0	0.0	0.0	0.0	0.0	0.0	0.0	0.0	0.0	0.0	0.0	0.0	0.0	0.0	0.0	0.0
CCND3	896	symbol	H. sapiens	896	H. sapiens	0.0	0.0	0.0	0.0	0.0	0.0	0.0	0.0	0.0	0.0	0.0	0.0	1.0	1.0	0.0	0.0	0.0	1.0	0.0	0.0
DDX60L	91351	symbol	H. sapiens	91351	H. sapiens	0.0	0.0	0.0	0.0	0.0	0.0	0.0	0.0	0.0	0.0	0.0	0.0	0.0	0.0	0.0	0.0	0.0	0.0	0.0	0.0
SLC38A9	153129	symbol	H. sapiens	153129	H. sapiens	0.0	0.0	0.0	1.0	0.0	0.0	0.0	0.0	0.0	0.0	0.0	0.0	1.0	0.0	0.0	0.0	0.0	0.0	0.0	0.0
C5orf15	56951	symbol	H. sapiens	56951	H. sapiens	0.0	0.0	0.0	0.0	0.0	0.0	0.0	0.0	0.0	0.0	0.0	0.0	0.0	0.0	0.0	0.0	0.0	0.0	0.0	0.0
ACAD11	84129	symbol	H. sapiens	84129	H. sapiens	0.0	0.0	0.0	0.0	0.0	0.0	0.0	0.0	0.0	0.0	0.0	0.0	0.0	0.0	0.0	0.0	0.0	0.0	0.0	0.0
SELENOP	6414	symbol	H. sapiens	6414	H. sapiens	0.0	0.0	0.0	0.0	0.0	0.0	1.0	0.0	0.0	0.0	1.0	0.0	0.0	0.0	0.0	0.0	0.0	0.0	0.0	0.0
CDV3	55573	symbol	H. sapiens	55573	H. sapiens	0.0	0.0	0.0	0.0	0.0	0.0	0.0	0.0	0.0	0.0	0.0	0.0	0.0	0.0	0.0	0.0	0.0	0.0	0.0	0.0
CCHCR1	54535	symbol	H. sapiens	54535	H. sapiens	0.0	0.0	0.0	0.0	0.0	0.0	0.0	0.0	0.0	0.0	0.0	0.0	0.0	0.0	0.0	0.0	0.0	0.0	0.0	0.0
SLC35B1	10237	symbol	H. sapiens	10237	H. sapiens	0.0	0.0	0.0	0.0	0.0	0.0	0.0	0.0	0.0	0.0	0.0	0.0	0.0	0.0	0.0	0.0	0.0	0.0	0.0	0.0
RAD17	5884	symbol	H. sapiens	5884	H. sapiens	0.0	0.0	0.0	0.0	0.0	0.0	0.0	0.0	0.0	0.0	0.0	0.0	0.0	1.0	0.0	0.0	0.0	0.0	0.0	0.0
HNRNPH1	3187	symbol	H. sapiens	3187	H. sapiens	0.0	0.0	0.0	0.0	0.0	0.0	0.0	0.0	0.0	0.0	0.0	0.0	1.0	0.0	0.0	0.0	0.0	0.0	0.0	0.0
TENT2	167153	symbol	H. sapiens	167153	H. sapiens	0.0	0.0	0.0	0.0	0.0	0.0	0.0	0.0	0.0	0.0	0.0	0.0	0.0	1.0	0.0	0.0	0.0	0.0	0.0	0.0
IFT122	55764	symbol	H. sapiens	55764	H. sapiens	0.0	0.0	0.0	0.0	0.0	0.0	0.0	0.0	0.0	0.0	0.0	0.0	0.0	1.0	0.0	0.0	0.0	0.0	1.0	0.0
PRLR	5618	symbol	H. sapiens	5618	H. sapiens	1.0	0.0	0.0	0.0	0.0	0.0	0.0	0.0	1.0	0.0	0.0	0.0	1.0	0.0	0.0	0.0	0.0	0.0	0.0	0.0
TMEM175	84286	symbol	H. sapiens	84286	H. sapiens	0.0	0.0	0.0	0.0	0.0	0.0	0.0	0.0	0.0	0.0	0.0	0.0	0.0	0.0	0.0	0.0	0.0	0.0	0.0	0.0
SH3BP2	6452	symbol	H. sapiens	6452	H. sapiens	0.0	0.0	0.0	0.0	0.0	0.0	0.0	0.0	0.0	0.0	0.0	0.0	0.0	0.0	0.0	0.0	0.0	0.0	0.0	0.0
CSNK1A1	1452	symbol	H. sapiens	1452	H. sapiens	0.0	0.0	1.0	0.0	0.0	0.0	0.0	0.0	0.0	0.0	0.0	1.0	0.0	1.0	0.0	0.0	0.0	0.0	0.0	0.0
CREBRF	153222	symbol	H. sapiens	153222	H. sapiens	1.0	0.0	0.0	0.0	0.0	0.0	0.0	0.0	0.0	0.0	0.0	0.0	1.0	0.0	0.0	0.0	0.0	0.0	0.0	0.0
RASA4	10156	symbol	H. sapiens	10156	H. sapiens	0.0	0.0	0.0	0.0	0.0	0.0	0.0	0.0	0.0	0.0	0.0	0.0	0.0	0.0	0.0	0.0	0.0	0.0	0.0	0.0
COX6C	1345	symbol	H. sapiens	1345	H. sapiens	0.0	0.0	0.0	0.0	0.0	0.0	0.0	0.0	0.0	0.0	0.0	0.0	0.0	0.0	0.0	0.0	0.0	0.0	0.0	0.0
PPP2CB	5516	symbol	H. sapiens	5516	H. sapiens	0.0	0.0	1.0	0.0	0.0	0.0	0.0	0.0	0.0	0.0	0.0	0.0	0.0	0.0	0.0	0.0	0.0	0.0	0.0	0.0
STAU2	27067	symbol	H. sapiens	27067	H. sapiens	0.0	0.0	0.0	0.0	0.0	0.0	0.0	0.0	0.0	0.0	0.0	0.0	0.0	0.0	0.0	0.0	0.0	0.0	0.0	0.0
RTL8A	26071	symbol	H. sapiens	26071	H. sapiens	0.0	0.0	0.0	0.0	0.0	0.0	0.0	0.0	0.0	0.0	0.0	0.0	0.0	0.0	0.0	0.0	0.0	0.0	0.0	0.0
SLC7A2	6542	symbol	H. sapiens	6542	H. sapiens	0.0	0.0	0.0	0.0	0.0	0.0	1.0	0.0	0.0	0.0	0.0	0.0	0.0	1.0	0.0	0.0	0.0	0.0	0.0	0.0
AARD	441376	symbol	H. sapiens	441376	H. sapiens	0.0	0.0	0.0	0.0	0.0	0.0	0.0	0.0	0.0	0.0	0.0	0.0	0.0	0.0	0.0	0.0	0.0	0.0	0.0	0.0
PTK2	5747	symbol	H. sapiens	5747	H. sapiens	0.0	0.0	1.0	1.0	1.0	1.0	0.0	0.0	1.0	0.0	1.0	1.0	1.0	1.0	0.0	0.0	0.0	0.0	0.0	0.0
PCM1	5108	symbol	H. sapiens	5108	H. sapiens	0.0	0.0	0.0	0.0	0.0	0.0	0.0	0.0	0.0	0.0	0.0	0.0	0.0	1.0	0.0	1.0	0.0	0.0	0.0	0.0
CFL1	1072	symbol	H. sapiens	1072	H. sapiens	1.0	0.0	0.0	0.0	0.0	0.0	0.0	0.0	0.0	0.0	1.0	0.0	0.0	1.0	0.0	0.0	0.0	0.0	0.0	0.0
ILVBL	10994	symbol	H. sapiens	10994	H. sapiens	0.0	0.0	0.0	0.0	0.0	0.0	0.0	0.0	0.0	0.0	0.0	0.0	0.0	0.0	0.0	0.0	0.0	0.0	0.0	0.0
TKFC	26007	symbol	H. sapiens	26007	H. sapiens	1.0	0.0	0.0	0.0	1.0	0.0	0.0	1.0	1.0	0.0	0.0	0.0	0.0	0.0	0.0	0.0	0.0	0.0	0.0	0.0
TCIRG1	10312	symbol	H. sapiens	10312	H. sapiens	0.0	1.0	1.0	1.0	0.0	0.0	1.0	1.0	0.0	0.0	0.0	0.0	1.0	0.0	0.0	1.0	0.0	0.0	0.0	0.0
SYVN1	84447	symbol	H. sapiens	84447	H. sapiens	0.0	0.0	1.0	0.0	0.0	0.0	0.0	0.0	0.0	0.0	0.0	1.0	0.0	0.0	0.0	0.0	0.0	1.0	0.0	0.0
CAPN1	823	symbol	H. sapiens	823	H. sapiens	0.0	0.0	0.0	1.0	0.0	0.0	1.0	0.0	0.0	0.0	0.0	0.0	0.0	0.0	0.0	0.0	0.0	0.0	0.0	0.0
DHCR7	1717	symbol	H. sapiens	1717	H. sapiens	0.0	0.0	0.0	0.0	0.0	1.0	0.0	0.0	1.0	0.0	1.0	0.0	0.0	0.0	0.0	0.0	0.0	0.0	0.0	0.0
DICER1	23405	symbol	H. sapiens	23405	H. sapiens	0.0	0.0	0.0	0.0	0.0	0.0	0.0	1.0	0.0	0.0	1.0	0.0	0.0	1.0	0.0	0.0	0.0	0.0	1.0	0.0
PAK1	5058	symbol	H. sapiens	5058	H. sapiens	0.0	0.0	0.0	0.0	1.0	0.0	0.0	0.0	0.0	0.0	1.0	0.0	1.0	1.0	0.0	1.0	0.0	1.0	1.0	0.0
USP33	23032	symbol	H. sapiens	23032	H. sapiens	0.0	0.0	1.0	1.0	0.0	0.0	0.0	0.0	0.0	0.0	1.0	0.0	0.0	1.0	0.0	0.0	0.0	0.0	0.0	0.0
CD59	966	symbol	H. sapiens	966	H. sapiens	0.0	1.0	0.0	0.0	1.0	0.0	1.0	0.0	0.0	0.0	0.0	0.0	0.0	0.0	0.0	0.0	0.0	0.0	0.0	0.0
FTH1	2495	symbol	H. sapiens	2495	H. sapiens	0.0	0.0	0.0	0.0	0.0	0.0	1.0	0.0	0.0	0.0	0.0	0.0	0.0	0.0	0.0	0.0	0.0	0.0	1.0	0.0
NXF1	10482	symbol	H. sapiens	10482	H. sapiens	0.0	0.0	0.0	0.0	0.0	0.0	0.0	0.0	0.0	0.0	0.0	0.0	0.0	0.0	0.0	0.0	0.0	0.0	0.0	0.0
LGALS8	3964	symbol	H. sapiens	3964	H. sapiens	1.0	0.0	0.0	1.0	0.0	0.0	0.0	0.0	0.0	0.0	0.0	0.0	0.0	0.0	0.0	0.0	0.0	0.0	0.0	0.0
HSPA8	3312	symbol	H. sapiens	3312	H. sapiens	1.0	0.0	0.0	1.0	0.0	0.0	1.0	0.0	0.0	0.0	0.0	0.0	0.0	1.0	0.0	1.0	0.0	1.0	0.0	0.0
LMO7	4008	symbol	H. sapiens	4008	H. sapiens	0.0	0.0	1.0	0.0	0.0	0.0	0.0	0.0	0.0	0.0	0.0	0.0	0.0	1.0	0.0	0.0	0.0	0.0	0.0	0.0
APLP2	334	symbol	H. sapiens	334	H. sapiens	0.0	0.0	0.0	0.0	0.0	0.0	1.0	0.0	0.0	0.0	0.0	1.0	0.0	1.0	0.0	0.0	0.0	0.0	0.0	0.0
RDX	5962	symbol	H. sapiens	5962	H. sapiens	0.0	0.0	1.0	0.0	0.0	0.0	0.0	0.0	0.0	0.0	1.0	0.0	1.0	1.0	0.0	1.0	0.0	0.0	0.0	0.0
BCLAF1	9774	symbol	H. sapiens	9774	H. sapiens	0.0	0.0	0.0	0.0	0.0	0.0	0.0	0.0	0.0	0.0	0.0	1.0	0.0	1.0	0.0	0.0	0.0	1.0	0.0	0.0
TSG101	7251	symbol	H. sapiens	7251	H. sapiens	1.0	0.0	1.0	1.0	0.0	0.0	0.0	0.0	0.0	1.0	1.0	0.0	1.0	0.0	0.0	1.0	0.0	0.0	1.0	0.0
DBI	1622	symbol	H. sapiens	1622	H. sapiens	0.0	0.0	0.0	0.0	0.0	0.0	0.0	0.0	0.0	0.0	0.0	0.0	0.0	0.0	0.0	0.0	0.0	0.0	0.0	0.0
BTBD6	90135	symbol	H. sapiens	90135	H. sapiens	0.0	0.0	0.0	0.0	0.0	0.0	0.0	0.0	0.0	0.0	0.0	0.0	0.0	1.0	0.0	0.0	0.0	0.0	0.0	0.0
CLIP1	6249	symbol	H. sapiens	6249	H. sapiens	0.0	0.0	0.0	0.0	0.0	0.0	0.0	0.0	0.0	0.0	0.0	0.0	0.0	0.0	0.0	0.0	0.0	0.0	0.0	0.0
ASB8	140461	symbol	H. sapiens	140461	H. sapiens	0.0	0.0	0.0	0.0	0.0	0.0	0.0	0.0	0.0	0.0	0.0	0.0	0.0	1.0	0.0	0.0	0.0	0.0	0.0	0.0
RNF10	9921	symbol	H. sapiens	9921	H. sapiens	0.0	0.0	0.0	0.0	0.0	0.0	0.0	0.0	0.0	0.0	0.0	0.0	0.0	0.0	0.0	0.0	0.0	0.0	1.0	0.0
RAP1B	5908	symbol	H. sapiens	5908	H. sapiens	1.0	0.0	0.0	0.0	0.0	0.0	1.0	0.0	0.0	0.0	0.0	0.0	1.0	0.0	0.0	1.0	0.0	0.0	0.0	0.0
LSM14A	26065	symbol	H. sapiens	26065	H. sapiens	1.0	0.0	0.0	0.0	1.0	0.0	0.0	1.0	0.0	0.0	0.0	0.0	0.0	0.0	0.0	0.0	0.0	0.0	0.0	0.0
ZNF268	10795	symbol	H. sapiens	10795	H. sapiens	0.0	0.0	0.0	0.0	0.0	0.0	0.0	0.0	0.0	0.0	0.0	1.0	0.0	1.0	0.0	0.0	0.0	0.0	1.0	0.0
MFGE8	4240	symbol	H. sapiens	4240	H. sapiens	0.0	0.0	0.0	0.0	0.0	0.0	0.0	0.0	0.0	0.0	0.0	0.0	0.0	1.0	0.0	0.0	0.0	0.0	0.0	0.0
COPS2	9318	symbol	H. sapiens	9318	H. sapiens	0.0	0.0	0.0	0.0	0.0	0.0	0.0	0.0	0.0	0.0	1.0	0.0	0.0	1.0	0.0	0.0	0.0	0.0	0.0	0.0
AP003419.1						nan	nan	nan	nan	nan	nan	nan	nan	nan	nan	nan	nan	nan	nan	nan	nan	nan	nan	nan	nan
RARG	5916	symbol	H. sapiens	5916	H. sapiens	0.0	0.0	0.0	0.0	0.0	0.0	0.0	0.0	0.0	0.0	1.0	1.0	1.0	1.0	0.0	0.0	0.0	0.0	1.0	0.0
STARD10	10809	symbol	H. sapiens	10809	H. sapiens	0.0	0.0	0.0	0.0	0.0	0.0	0.0	0.0	1.0	0.0	0.0	0.0	0.0	0.0	0.0	0.0	0.0	0.0	0.0	0.0
CORO1B	57175	symbol	H. sapiens	57175	H. sapiens	0.0	0.0	0.0	0.0	0.0	0.0	0.0	0.0	0.0	0.0	1.0	0.0	0.0	0.0	0.0	0.0	0.0	0.0	0.0	0.0
PFDN5	5204	symbol	H. sapiens	5204	H. sapiens	0.0	0.0	0.0	0.0	0.0	0.0	0.0	0.0	0.0	0.0	0.0	0.0	0.0	1.0	0.0	0.0	0.0	0.0	0.0	0.0
TMBIM6	7009	symbol	H. sapiens	7009	H. sapiens	0.0	0.0	0.0	1.0	0.0	0.0	0.0	0.0	0.0	0.0	0.0	1.0	0.0	1.0	1.0	1.0	0.0	1.0	0.0	0.0
DAZAP2	9802	symbol	H. sapiens	9802	H. sapiens	0.0	0.0	0.0	0.0	0.0	0.0	0.0	0.0	0.0	0.0	0.0	0.0	0.0	0.0	0.0	0.0	0.0	1.0	0.0	0.0
RITA1	84934	symbol	H. sapiens	84934	H. sapiens	0.0	0.0	0.0	0.0	0.0	0.0	0.0	0.0	0.0	0.0	0.0	0.0	0.0	0.0	0.0	0.0	0.0	0.0	0.0	0.0
AC008014.1						nan	nan	nan	nan	nan	nan	nan	nan	nan	nan	nan	nan	nan	nan	nan	nan	nan	nan	nan	nan
VEZT	55591	symbol	H. sapiens	55591	H. sapiens	0.0	0.0	0.0	0.0	0.0	0.0	0.0	0.0	0.0	0.0	0.0	0.0	0.0	0.0	0.0	0.0	0.0	0.0	0.0	0.0
RNASEK	440400	symbol	H. sapiens	440400	H. sapiens	0.0	0.0	0.0	0.0	0.0	0.0	0.0	0.0	0.0	0.0	0.0	0.0	0.0	0.0	0.0	0.0	0.0	0.0	0.0	0.0
PPP4R3A	55671	symbol	H. sapiens	55671	H. sapiens	0.0	0.0	0.0	0.0	0.0	0.0	0.0	0.0	0.0	0.0	0.0	0.0	0.0	0.0	0.0	0.0	0.0	0.0	0.0	0.0
AKT1	207	symbol	H. sapiens	207	H. sapiens	1.0	0.0	1.0	1.0	0.0	1.0	0.0	0.0	1.0	0.0	1.0	1.0	1.0	1.0	1.0	1.0	1.0	1.0	0.0	0.0
FAM174B	400451	symbol	H. sapiens	400451	H. sapiens	0.0	0.0	0.0	0.0	0.0	0.0	0.0	0.0	0.0	0.0	0.0	0.0	0.0	0.0	0.0	0.0	0.0	0.0	0.0	0.0
TMED10	10972	symbol	H. sapiens	10972	H. sapiens	0.0	0.0	0.0	0.0	0.0	0.0	1.0	0.0	0.0	0.0	0.0	0.0	0.0	0.0	0.0	0.0	0.0	0.0	0.0	0.0
POMT2	29954	symbol	H. sapiens	29954	H. sapiens	0.0	0.0	1.0	0.0	0.0	0.0	0.0	0.0	0.0	0.0	0.0	0.0	0.0	0.0	0.0	0.0	0.0	0.0	0.0	0.0
AC005520.4						nan	nan	nan	nan	nan	nan	nan	nan	nan	nan	nan	nan	nan	nan	nan	nan	nan	nan	nan	nan
EIF5	1983	symbol	H. sapiens	1983	H. sapiens	0.0	0.0	0.0	0.0	0.0	0.0	0.0	0.0	0.0	0.0	0.0	0.0	0.0	0.0	0.0	0.0	0.0	0.0	0.0	0.0
TSPAN3	10099	symbol	H. sapiens	10099	H. sapiens	0.0	0.0	0.0	0.0	0.0	0.0	0.0	0.0	0.0	0.0	0.0	0.0	0.0	0.0	0.0	0.0	0.0	0.0	0.0	0.0
TCF12	6938	symbol	H. sapiens	6938	H. sapiens	0.0	0.0	0.0	0.0	0.0	0.0	0.0	0.0	0.0	0.0	1.0	0.0	0.0	1.0	0.0	0.0	0.0	0.0	0.0	0.0
DCAF11	80344	symbol	H. sapiens	80344	H. sapiens	0.0	0.0	1.0	0.0	0.0	0.0	0.0	0.0	0.0	0.0	0.0	0.0	0.0	1.0	0.0	0.0	0.0	0.0	0.0	0.0
IVD	3712	symbol	H. sapiens	3712	H. sapiens	0.0	0.0	0.0	0.0	0.0	0.0	0.0	0.0	0.0	0.0	0.0	0.0	0.0	1.0	0.0	0.0	0.0	0.0	0.0	0.0
APH1B	83464	symbol	H. sapiens	83464	H. sapiens	0.0	0.0	0.0	0.0	0.0	0.0	0.0	0.0	0.0	0.0	0.0	1.0	1.0	0.0	0.0	0.0	0.0	0.0	0.0	0.0
ZNF774	342132	symbol	H. sapiens	342132	H. sapiens	0.0	0.0	0.0	0.0	0.0	0.0	0.0	0.0	0.0	0.0	0.0	0.0	0.0	0.0	0.0	0.0	0.0	0.0	0.0	0.0
CCDC32	90416	symbol	H. sapiens	90416	H. sapiens	0.0	0.0	0.0	0.0	0.0	0.0	0.0	0.0	0.0	0.0	0.0	0.0	0.0	0.0	0.0	0.0	0.0	0.0	0.0	0.0
SNRPA1	6627	symbol	H. sapiens	6627	H. sapiens	1.0	0.0	0.0	0.0	0.0	0.0	0.0	0.0	0.0	0.0	0.0	0.0	0.0	0.0	0.0	0.0	0.0	0.0	0.0	0.0
ISG20	3669	symbol	H. sapiens	3669	H. sapiens	1.0	0.0	0.0	0.0	0.0	0.0	0.0	0.0	0.0	0.0	0.0	0.0	0.0	1.0	0.0	0.0	0.0	0.0	0.0	0.0
ADIRF	10974	symbol	H. sapiens	10974	H. sapiens	0.0	0.0	0.0	0.0	0.0	0.0	0.0	0.0	0.0	0.0	0.0	0.0	0.0	0.0	0.0	0.0	0.0	0.0	0.0	0.0
POLR2C	5432	symbol	H. sapiens	5432	H. sapiens	1.0	0.0	0.0	0.0	0.0	0.0	0.0	0.0	0.0	0.0	0.0	0.0	1.0	0.0	0.0	0.0	0.0	0.0	0.0	0.0
GLG1	2734	symbol	H. sapiens	2734	H. sapiens	0.0	0.0	0.0	0.0	0.0	0.0	0.0	0.0	0.0	0.0	0.0	0.0	0.0	0.0	0.0	0.0	0.0	0.0	0.0	0.0
ARL6IP1	23204	symbol	H. sapiens	23204	H. sapiens	0.0	0.0	0.0	0.0	0.0	0.0	0.0	0.0	0.0	0.0	0.0	1.0	0.0	0.0	0.0	0.0	0.0	0.0	0.0	0.0
FBXO22	26263	symbol	H. sapiens	26263	H. sapiens	0.0	0.0	1.0	0.0	0.0	0.0	0.0	0.0	0.0	0.0	0.0	1.0	0.0	1.0	0.0	0.0	0.0	0.0	0.0	0.0
NFAT5	10725	symbol	H. sapiens	10725	H. sapiens	0.0	0.0	0.0	0.0	0.0	0.0	0.0	1.0	0.0	0.0	0.0	0.0	0.0	1.0	0.0	0.0	0.0	0.0	0.0	0.0
RAB11A	8766	symbol	H. sapiens	8766	H. sapiens	0.0	0.0	0.0	0.0	0.0	0.0	0.0	0.0	0.0	0.0	1.0	0.0	0.0	1.0	0.0	1.0	0.0	0.0	0.0	0.0
AC106782.3						nan	nan	nan	nan	nan	nan	nan	nan	nan	nan	nan	nan	nan	nan	nan	nan	nan	nan	nan	nan
NTAN1	123803	symbol	H. sapiens	123803	H. sapiens	0.0	0.0	1.0	0.0	0.0	0.0	0.0	0.0	0.0	0.0	0.0	0.0	0.0	0.0	0.0	0.0	0.0	0.0	0.0	0.0
DCTPP1	79077	symbol	H. sapiens	79077	H. sapiens	0.0	0.0	0.0	0.0	0.0	0.0	0.0	0.0	0.0	0.0	0.0	0.0	0.0	1.0	0.0	0.0	0.0	0.0	0.0	0.0
RABEP2	79874	symbol	H. sapiens	79874	H. sapiens	0.0	0.0	0.0	0.0	0.0	0.0	0.0	0.0	0.0	0.0	1.0	0.0	0.0	0.0	0.0	0.0	0.0	0.0	0.0	0.0
JPT2	90861	symbol	H. sapiens	90861	H. sapiens	0.0	0.0	0.0	0.0	0.0	0.0	0.0	0.0	0.0	0.0	0.0	0.0	0.0	0.0	0.0	0.0	0.0	0.0	0.0	0.0
MLST8	64223	symbol	H. sapiens	64223	H. sapiens	0.0	0.0	0.0	1.0	0.0	0.0	0.0	0.0	0.0	0.0	0.0	0.0	0.0	0.0	0.0	0.0	0.0	1.0	0.0	0.0
MBTPS1	8720	symbol	H. sapiens	8720	H. sapiens	0.0	0.0	0.0	0.0	0.0	1.0	0.0	0.0	1.0	0.0	0.0	0.0	0.0	1.0	0.0	0.0	0.0	0.0	0.0	0.0
NOB1	28987	symbol	H. sapiens	28987	H. sapiens	0.0	0.0	0.0	0.0	0.0	0.0	0.0	0.0	0.0	0.0	0.0	0.0	0.0	0.0	0.0	0.0	0.0	0.0	0.0	0.0
AC012146.1						nan	nan	nan	nan	nan	nan	nan	nan	nan	nan	nan	nan	nan	nan	nan	nan	nan	nan	nan	nan
TOM1L1	10040	symbol	H. sapiens	10040	H. sapiens	0.0	0.0	1.0	0.0	0.0	0.0	0.0	0.0	0.0	0.0	0.0	0.0	0.0	1.0	0.0	0.0	0.0	0.0	0.0	0.0
TRIM25	7706	symbol	H. sapiens	7706	H. sapiens	1.0	0.0	1.0	0.0	0.0	0.0	0.0	1.0	0.0	1.0	0.0	0.0	0.0	0.0	0.0	0.0	1.0	0.0	0.0	0.0
SGSM2	9905	symbol	H. sapiens	9905	H. sapiens	0.0	0.0	0.0	0.0	0.0	0.0	0.0	0.0	0.0	0.0	0.0	0.0	0.0	0.0	0.0	0.0	0.0	0.0	0.0	0.0
RSL1D1	26156	symbol	H. sapiens	26156	H. sapiens	0.0	0.0	0.0	0.0	0.0	0.0	0.0	0.0	0.0	0.0	0.0	0.0	0.0	0.0	0.0	0.0	0.0	1.0	0.0	0.0
XAF1	54739	symbol	H. sapiens	54739	H. sapiens	1.0	0.0	0.0	0.0	0.0	0.0	0.0	0.0	0.0	1.0	0.0	0.0	0.0	0.0	0.0	0.0	0.0	0.0	0.0	0.0
RNF43	54894	symbol	H. sapiens	54894	H. sapiens	0.0	0.0	1.0	0.0	0.0	0.0	0.0	0.0	0.0	0.0	0.0	0.0	0.0	1.0	0.0	0.0	0.0	0.0	0.0	0.0
CLTC	1213	symbol	H. sapiens	1213	H. sapiens	0.0	1.0	1.0	1.0	0.0	1.0	0.0	0.0	0.0	0.0	0.0	0.0	0.0	1.0	0.0	1.0	0.0	0.0	0.0	1.0
CENPX	201254	symbol	H. sapiens	201254	H. sapiens	0.0	0.0	0.0	0.0	0.0	0.0	0.0	0.0	0.0	0.0	0.0	0.0	0.0	0.0	0.0	0.0	0.0	0.0	0.0	0.0
NCOR1	9611	symbol	H. sapiens	9611	H. sapiens	0.0	0.0	0.0	0.0	0.0	1.0	0.0	0.0	1.0	0.0	0.0	0.0	1.0	1.0	0.0	0.0	0.0	1.0	0.0	0.0
TVP23B	51030	symbol	H. sapiens	51030	H. sapiens	0.0	0.0	0.0	0.0	0.0	0.0	0.0	0.0	0.0	0.0	0.0	0.0	0.0	0.0	0.0	0.0	0.0	0.0	0.0	0.0
WIPF2	147179	symbol	H. sapiens	147179	H. sapiens	0.0	0.0	0.0	0.0	1.0	0.0	0.0	0.0	0.0	0.0	0.0	0.0	0.0	1.0	0.0	0.0	0.0	0.0	0.0	0.0
EIF4A1	1973	symbol	H. sapiens	1973	H. sapiens	0.0	0.0	0.0	0.0	0.0	0.0	0.0	0.0	0.0	0.0	0.0	0.0	0.0	0.0	0.0	0.0	0.0	0.0	0.0	0.0
MYL12A	10627	symbol	H. sapiens	10627	H. sapiens	0.0	0.0	0.0	0.0	0.0	0.0	0.0	0.0	0.0	0.0	0.0	0.0	0.0	0.0	0.0	0.0	0.0	0.0	0.0	0.0
STARD3	10948	symbol	H. sapiens	10948	H. sapiens	0.0	0.0	0.0	0.0	0.0	1.0	0.0	0.0	1.0	0.0	0.0	0.0	0.0	0.0	0.0	0.0	0.0	0.0	0.0	0.0
AMZ2	51321	symbol	H. sapiens	51321	H. sapiens	0.0	0.0	0.0	0.0	0.0	0.0	0.0	0.0	0.0	0.0	0.0	0.0	0.0	0.0	0.0	0.0	0.0	0.0	0.0	0.0
CNDP2	55748	symbol	H. sapiens	55748	H. sapiens	0.0	0.0	0.0	0.0	0.0	0.0	0.0	0.0	0.0	0.0	0.0	0.0	0.0	0.0	0.0	0.0	0.0	0.0	0.0	0.0
C17orf80	55028	symbol	H. sapiens	55028	H. sapiens	0.0	0.0	0.0	0.0	0.0	0.0	0.0	0.0	0.0	0.0	0.0	0.0	0.0	0.0	0.0	0.0	0.0	0.0	0.0	0.0
AC138207.3						nan	nan	nan	nan	nan	nan	nan	nan	nan	nan	nan	nan	nan	nan	nan	nan	nan	nan	nan	nan
PIN1	5300	symbol	H. sapiens	5300	H. sapiens	0.0	0.0	1.0	0.0	0.0	0.0	0.0	1.0	0.0	0.0	1.0	1.0	0.0	1.0	0.0	1.0	0.0	0.0	0.0	0.0
BCAS3	54828	symbol	H. sapiens	54828	H. sapiens	0.0	0.0	0.0	0.0	0.0	0.0	0.0	0.0	0.0	0.0	1.0	0.0	0.0	0.0	0.0	1.0	0.0	0.0	0.0	0.0
POLR2I	5438	symbol	H. sapiens	5438	H. sapiens	1.0	0.0	0.0	0.0	0.0	0.0	0.0	0.0	0.0	0.0	0.0	0.0	1.0	0.0	0.0	0.0	0.0	0.0	0.0	0.0
ERCC2	2068	symbol	H. sapiens	2068	H. sapiens	0.0	0.0	0.0	0.0	0.0	0.0	0.0	0.0	0.0	0.0	1.0	0.0	0.0	1.0	0.0	0.0	0.0	0.0	0.0	0.0
AC008686.1						nan	nan	nan	nan	nan	nan	nan	nan	nan	nan	nan	nan	nan	nan	nan	nan	nan	nan	nan	nan
REXO1	57455	symbol	H. sapiens	57455	H. sapiens	0.0	0.0	0.0	0.0	0.0	0.0	0.0	0.0	0.0	0.0	0.0	0.0	0.0	0.0	0.0	0.0	0.0	0.0	0.0	0.0
PLEKHH3	79990	symbol	H. sapiens	79990	H. sapiens	0.0	0.0	0.0	0.0	0.0	0.0	0.0	0.0	0.0	0.0	0.0	0.0	0.0	0.0	0.0	0.0	0.0	0.0	0.0	0.0
EIF3G	8666	symbol	H. sapiens	8666	H. sapiens	0.0	0.0	0.0	0.0	0.0	0.0	0.0	0.0	0.0	0.0	0.0	0.0	0.0	0.0	0.0	0.0	0.0	0.0	0.0	0.0
TJP3	27134	symbol	H. sapiens	27134	H. sapiens	0.0	0.0	0.0	0.0	0.0	0.0	0.0	0.0	0.0	0.0	0.0	0.0	0.0	0.0	0.0	0.0	0.0	0.0	0.0	0.0
GADD45B	4616	symbol	H. sapiens	4616	H. sapiens	0.0	0.0	0.0	0.0	0.0	0.0	0.0	0.0	0.0	0.0	0.0	1.0	0.0	0.0	0.0	0.0	0.0	1.0	0.0	0.0
ROGDI	79641	symbol	H. sapiens	79641	H. sapiens	0.0	0.0	0.0	0.0	0.0	0.0	0.0	0.0	0.0	0.0	0.0	0.0	0.0	0.0	0.0	0.0	0.0	0.0	0.0	0.0
TNPO2	30000	symbol	H. sapiens	30000	H. sapiens	0.0	0.0	0.0	0.0	0.0	0.0	0.0	0.0	0.0	0.0	0.0	0.0	0.0	0.0	0.0	0.0	0.0	0.0	0.0	0.0
ATP5F1D	513	symbol	H. sapiens	513	H. sapiens	0.0	0.0	0.0	0.0	0.0	0.0	0.0	0.0	0.0	0.0	0.0	0.0	0.0	0.0	0.0	0.0	0.0	0.0	0.0	0.0
RMC1	29919	symbol	H. sapiens	29919	H. sapiens	0.0	0.0	0.0	1.0	0.0	0.0	0.0	0.0	0.0	0.0	0.0	0.0	0.0	0.0	0.0	0.0	0.0	0.0	0.0	0.0
TMEM205	374882	symbol	H. sapiens	374882	H. sapiens	0.0	0.0	0.0	0.0	0.0	0.0	0.0	0.0	0.0	0.0	0.0	0.0	0.0	0.0	0.0	0.0	0.0	0.0	0.0	0.0
SLC39A6	25800	symbol	H. sapiens	25800	H. sapiens	0.0	0.0	0.0	0.0	0.0	0.0	0.0	0.0	0.0	0.0	0.0	0.0	0.0	0.0	0.0	0.0	0.0	0.0	0.0	0.0
CIRBP	1153	symbol	H. sapiens	1153	H. sapiens	0.0	0.0	0.0	0.0	0.0	0.0	0.0	0.0	0.0	0.0	0.0	0.0	0.0	1.0	0.0	0.0	0.0	0.0	0.0	0.0
USP32	84669	symbol	H. sapiens	84669	H. sapiens	0.0	0.0	1.0	0.0	0.0	0.0	0.0	0.0	0.0	0.0	0.0	0.0	0.0	1.0	0.0	0.0	0.0	0.0	0.0	0.0
SMAD7	4092	symbol	H. sapiens	4092	H. sapiens	0.0	1.0	1.0	0.0	0.0	0.0	1.0	1.0	0.0	0.0	0.0	1.0	0.0	1.0	0.0	0.0	0.0	0.0	0.0	0.0
CLASRP	11129	symbol	H. sapiens	11129	H. sapiens	0.0	0.0	0.0	0.0	0.0	0.0	0.0	0.0	0.0	0.0	0.0	0.0	0.0	0.0	0.0	0.0	0.0	0.0	0.0	0.0
ANKS3	124401	symbol	H. sapiens	124401	H. sapiens	0.0	0.0	0.0	0.0	0.0	0.0	0.0	0.0	0.0	0.0	0.0	0.0	0.0	0.0	0.0	0.0	0.0	0.0	0.0	0.0
GASK1B	51313	symbol	H. sapiens	51313	H. sapiens	0.0	0.0	0.0	0.0	0.0	0.0	0.0	0.0	0.0	0.0	0.0	0.0	0.0	0.0	0.0	0.0	0.0	0.0	0.0	0.0
AP2A1	160	symbol	H. sapiens	160	H. sapiens	0.0	1.0	1.0	0.0	0.0	1.0	0.0	0.0	0.0	0.0	1.0	0.0	1.0	1.0	0.0	0.0	0.0	0.0	0.0	1.0
HNRNPUL1	11100	symbol	H. sapiens	11100	H. sapiens	1.0	0.0	0.0	0.0	0.0	0.0	0.0	0.0	0.0	0.0	0.0	0.0	0.0	0.0	0.0	0.0	0.0	0.0	0.0	0.0
AC008655.1						nan	nan	nan	nan	nan	nan	nan	nan	nan	nan	nan	nan	nan	nan	nan	nan	nan	nan	nan	nan
ZNF85	7639	symbol	H. sapiens	7639	H. sapiens	0.0	0.0	0.0	0.0	0.0	0.0	0.0	0.0	0.0	0.0	0.0	0.0	0.0	0.0	0.0	0.0	0.0	0.0	0.0	0.0
PTOV1	53635	symbol	H. sapiens	53635	H. sapiens	0.0	0.0	0.0	0.0	0.0	0.0	0.0	0.0	0.0	0.0	0.0	0.0	0.0	0.0	0.0	0.0	0.0	0.0	0.0	0.0
SLC6A14	11254	symbol	H. sapiens	11254	H. sapiens	0.0	0.0	0.0	0.0	0.0	0.0	0.0	0.0	0.0	0.0	0.0	0.0	0.0	1.0	0.0	0.0	0.0	0.0	0.0	0.0
PLD3	23646	symbol	H. sapiens	23646	H. sapiens	0.0	0.0	0.0	0.0	0.0	0.0	0.0	0.0	0.0	0.0	0.0	0.0	0.0	0.0	0.0	0.0	0.0	0.0	0.0	0.0
AL137002.1						nan	nan	nan	nan	nan	nan	nan	nan	nan	nan	nan	nan	nan	nan	nan	nan	nan	nan	nan	nan
UPF1	5976	symbol	H. sapiens	5976	H. sapiens	0.0	0.0	1.0	0.0	0.0	0.0	0.0	0.0	0.0	0.0	0.0	0.0	0.0	1.0	0.0	0.0	0.0	0.0	0.0	0.0
HAUS8	93323	symbol	H. sapiens	93323	H. sapiens	0.0	0.0	0.0	0.0	0.0	0.0	0.0	0.0	0.0	0.0	0.0	0.0	0.0	1.0	0.0	0.0	0.0	0.0	0.0	0.0
KXD1	79036	symbol	H. sapiens	79036	H. sapiens	0.0	0.0	0.0	0.0	0.0	0.0	0.0	0.0	0.0	0.0	0.0	0.0	0.0	0.0	0.0	0.0	0.0	0.0	0.0	0.0
CRTC1	23373	symbol	H. sapiens	23373	H. sapiens	0.0	0.0	0.0	0.0	0.0	0.0	0.0	0.0	0.0	0.0	1.0	0.0	0.0	0.0	0.0	0.0	0.0	0.0	0.0	0.0
H2AC19	723790	symbol	H. sapiens	723790	H. sapiens	0.0	0.0	0.0	0.0	0.0	0.0	0.0	0.0	0.0	0.0	0.0	0.0	0.0	0.0	0.0	0.0	0.0	0.0	0.0	0.0
LINC01145	103091866	symbol	H. sapiens	103091866	H. sapiens	0.0	0.0	0.0	0.0	0.0	0.0	0.0	0.0	0.0	0.0	0.0	0.0	0.0	0.0	0.0	0.0	0.0	0.0	0.0	0.0
AL137073.1						nan	nan	nan	nan	nan	nan	nan	nan	nan	nan	nan	nan	nan	nan	nan	nan	nan	nan	nan	nan
MUC1	4582	symbol	H. sapiens	4582	H. sapiens	1.0	0.0	0.0	0.0	1.0	0.0	0.0	0.0	0.0	0.0	0.0	1.0	0.0	1.0	0.0	0.0	0.0	1.0	0.0	0.0
THAP4	51078	symbol	H. sapiens	51078	H. sapiens	0.0	0.0	0.0	0.0	0.0	0.0	0.0	0.0	0.0	0.0	0.0	0.0	0.0	0.0	0.0	0.0	0.0	0.0	0.0	0.0
METTL8	79828	symbol	H. sapiens	79828	H. sapiens	0.0	0.0	0.0	0.0	0.0	0.0	0.0	0.0	0.0	0.0	0.0	0.0	0.0	0.0	0.0	0.0	0.0	0.0	0.0	0.0
PSME2	5721	symbol	H. sapiens	5721	H. sapiens	1.0	1.0	1.0	0.0	1.0	1.0	0.0	0.0	0.0	0.0	0.0	1.0	0.0	1.0	0.0	0.0	0.0	0.0	0.0	0.0
TMEM265	100862671	symbol	H. sapiens	100862671	H. sapiens	0.0	0.0	0.0	0.0	0.0	0.0	0.0	0.0	0.0	0.0	0.0	0.0	0.0	0.0	0.0	0.0	0.0	0.0	0.0	0.0
CTSH	1512	symbol	H. sapiens	1512	H. sapiens	0.0	1.0	1.0	0.0	1.0	0.0	1.0	0.0	0.0	0.0	0.0	1.0	1.0	1.0	0.0	0.0	0.0	0.0	0.0	0.0
IFI27	3429	symbol	H. sapiens	3429	H. sapiens	1.0	0.0	1.0	0.0	0.0	0.0	0.0	0.0	0.0	0.0	0.0	1.0	0.0	0.0	0.0	1.0	0.0	0.0	0.0	0.0
TMC4	147798	symbol	H. sapiens	147798	H. sapiens	0.0	0.0	0.0	0.0	0.0	0.0	0.0	0.0	0.0	0.0	0.0	0.0	0.0	0.0	0.0	0.0	0.0	0.0	0.0	0.0
AL845472.2						nan	nan	nan	nan	nan	nan	nan	nan	nan	nan	nan	nan	nan	nan	nan	nan	nan	nan	nan	nan
PRAL	109245082	symbol	H. sapiens	109245082	H. sapiens	0.0	0.0	0.0	0.0	0.0	0.0	0.0	0.0	0.0	0.0	0.0	0.0	0.0	0.0	0.0	0.0	0.0	0.0	0.0	0.0
LUC7L3	51747	symbol	H. sapiens	51747	H. sapiens	0.0	0.0	0.0	0.0	0.0	0.0	0.0	0.0	0.0	0.0	0.0	0.0	0.0	0.0	0.0	0.0	0.0	0.0	0.0	0.0
CHD2	1106	symbol	H. sapiens	1106	H. sapiens	0.0	0.0	0.0	0.0	0.0	0.0	0.0	0.0	0.0	0.0	0.0	0.0	0.0	1.0	0.0	0.0	0.0	0.0	0.0	0.0
ADH5	128	symbol	H. sapiens	128	H. sapiens	0.0	0.0	0.0	0.0	0.0	0.0	0.0	0.0	1.0	0.0	0.0	0.0	0.0	0.0	0.0	0.0	0.0	0.0	0.0	0.0
BBS9	27241	symbol	H. sapiens	27241	H. sapiens	0.0	0.0	0.0	0.0	0.0	0.0	0.0	0.0	0.0	0.0	0.0	0.0	0.0	0.0	0.0	0.0	0.0	0.0	0.0	0.0
FHL1	2273	symbol	H. sapiens	2273	H. sapiens	0.0	0.0	0.0	0.0	0.0	0.0	0.0	0.0	0.0	0.0	1.0	0.0	0.0	1.0	0.0	0.0	0.0	0.0	0.0	0.0
ERO1A	30001	symbol	H. sapiens	30001	H. sapiens	0.0	0.0	0.0	0.0	0.0	0.0	0.0	0.0	0.0	0.0	0.0	1.0	0.0	1.0	0.0	0.0	0.0	0.0	0.0	0.0
PLIN4	729359	symbol	H. sapiens	729359	H. sapiens	0.0	0.0	0.0	0.0	0.0	0.0	0.0	0.0	0.0	0.0	0.0	0.0	0.0	0.0	0.0	0.0	0.0	0.0	0.0	0.0
H4C8	8365	symbol	H. sapiens	8365	H. sapiens	0.0	0.0	0.0	0.0	0.0	0.0	0.0	0.0	0.0	0.0	0.0	0.0	0.0	0.0	0.0	0.0	0.0	0.0	0.0	0.0
BISPR	105221694	symbol	H. sapiens	105221694	H. sapiens	0.0	0.0	0.0	0.0	0.0	0.0	0.0	0.0	0.0	0.0	0.0	0.0	0.0	0.0	0.0	0.0	0.0	0.0	0.0	0.0
ATP6AP2	10159	symbol	H. sapiens	10159	H. sapiens	0.0	0.0	0.0	0.0	0.0	0.0	1.0	1.0	0.0	0.0	0.0	0.0	0.0	1.0	0.0	0.0	0.0	0.0	0.0	0.0
AC087521.4						nan	nan	nan	nan	nan	nan	nan	nan	nan	nan	nan	nan	nan	nan	nan	nan	nan	nan	nan	nan
AL022312.1						nan	nan	nan	nan	nan	nan	nan	nan	nan	nan	nan	nan	nan	nan	nan	nan	nan	nan	nan	nan
CTSD	1509	symbol	H. sapiens	1509	H. sapiens	0.0	1.0	0.0	0.0	0.0	0.0	1.0	0.0	0.0	0.0	0.0	1.0	0.0	0.0	0.0	1.0	0.0	0.0	0.0	1.0
PIGN	23556	symbol	H. sapiens	23556	H. sapiens	0.0	0.0	0.0	0.0	0.0	0.0	0.0	0.0	1.0	0.0	0.0	0.0	0.0	0.0	0.0	0.0	0.0	0.0	0.0	0.0

## Sheet: Enrichment_up_isoforms
GroupID	Category	Term	Description	LogP	Log(q-value)	InTerm_InList	Genes	Symbols
1_Summary	GO Biological Processes	GO:0034340	response to type I interferon	-29.0796	-24.879	32/99	684,2537,3105,3106,3107,3133,3429,3430,3434,3437,3659,3669,4599,4600,4615,4938,4939,4940,5696,6772,6773,8519,8638,10379,10410,10581,11274,25939,26065,54739,55337,81844,207,246,567,972,1072,2625,2633,3123,3312,3934,4582,4792,5595,5618,5698,5699,5720,5721,5908,6627,6648,6850,7076,7706,7726,8878,8887,8904,9111,9861,10437,10538,10616,54625,79602,83666,126961,153222,333932,1191,2635,3964,3965,5094,535…	BST2,IFI6,HLA-A,HLA-B,HLA-C,HLA-E,IFI27,IFI35,IFIT1,IFIT3,IRF1,ISG20,MX1,MX2,MYD88,OAS1,OAS2,OAS3,PSMB8,STAT1,STAT2,IFITM1,OASL,IRF9,IFITM3,IFITM2,USP18,SAMHD1,LSM14A,XAF1,SHFL,TRIM56,AKT1,ALOX15,B2M,CD74,CFL1,GATA3,GBP1,HLA-DRB1,HSPA8,LCN2,MUC1,NFKBIA,MAPK3,PRLR,PSMB9,PSMB10,PSME1,PSME2,RAP1B,SNRPA1,SOD2,SYK,TIMP1,TRIM25,TRIM26,SQSTM1,TAX1BP1,CPNE1,NMI,PSMD6,IFI30,BATF,RBCK1,PARP14,ADIPOR2,PARP9…
1_Member	GO Biological Processes	GO:0034340	response to type I interferon	-29.0796	-24.879	32/99	684,2537,3105,3106,3107,3133,3429,3430,3434,3437,3659,3669,4599,4600,4615,4938,4939,4940,5696,6772,6773,8519,8638,10379,10410,10581,11274,25939,26065,54739,55337,81844	BST2,IFI6,HLA-A,HLA-B,HLA-C,HLA-E,IFI27,IFI35,IFIT1,IFIT3,IRF1,ISG20,MX1,MX2,MYD88,OAS1,OAS2,OAS3,PSMB8,STAT1,STAT2,IFITM1,OASL,IRF9,IFITM3,IFITM2,USP18,SAMHD1,LSM14A,XAF1,SHFL,TRIM56
1_Member	GO Biological Processes	GO:0060337	type I interferon signaling pathway	-26.9435	-23.2201	30/95	684,2537,3105,3106,3107,3133,3429,3430,3434,3437,3659,3669,4599,4600,4615,4938,4939,4940,5696,6772,6773,8519,8638,10379,10410,10581,11274,25939,26065,54739	BST2,IFI6,HLA-A,HLA-B,HLA-C,HLA-E,IFI27,IFI35,IFIT1,IFIT3,IRF1,ISG20,MX1,MX2,MYD88,OAS1,OAS2,OAS3,PSMB8,STAT1,STAT2,IFITM1,OASL,IRF9,IFITM3,IFITM2,USP18,SAMHD1,LSM14A,XAF1
1_Member	GO Biological Processes	GO:0071357	cellular response to type I interferon	-26.9435	-23.2201	30/95	684,2537,3105,3106,3107,3133,3429,3430,3434,3437,3659,3669,4599,4600,4615,4938,4939,4940,5696,6772,6773,8519,8638,10379,10410,10581,11274,25939,26065,54739	BST2,IFI6,HLA-A,HLA-B,HLA-C,HLA-E,IFI27,IFI35,IFIT1,IFIT3,IRF1,ISG20,MX1,MX2,MYD88,OAS1,OAS2,OAS3,PSMB8,STAT1,STAT2,IFITM1,OASL,IRF9,IFITM3,IFITM2,USP18,SAMHD1,LSM14A,XAF1
1_Member	GO Biological Processes	GO:0019221	cytokine-mediated signaling pathway	-23.6765	-20.078	69/798	207,246,567,684,972,1072,2537,2625,2633,3105,3106,3107,3123,3133,3312,3429,3430,3434,3437,3659,3669,3934,4582,4599,4600,4615,4792,4938,4939,4940,5595,5618,5696,5698,5699,5720,5721,5908,6627,6648,6772,6773,6850,7076,7706,7726,8519,8638,8878,8887,8904,9111,9861,10379,10410,10437,10538,10581,10616,11274,25939,26065,54625,54739,79602,83666,126961,153222,333932	AKT1,ALOX15,B2M,BST2,CD74,CFL1,IFI6,GATA3,GBP1,HLA-A,HLA-B,HLA-C,HLA-DRB1,HLA-E,HSPA8,IFI27,IFI35,IFIT1,IFIT3,IRF1,ISG20,LCN2,MUC1,MX1,MX2,MYD88,NFKBIA,OAS1,OAS2,OAS3,MAPK3,PRLR,PSMB8,PSMB9,PSMB10,PSME1,PSME2,RAP1B,SNRPA1,SOD2,STAT1,STAT2,SYK,TIMP1,TRIM25,TRIM26,IFITM1,OASL,SQSTM1,TAX1BP1,CPNE1,NMI,PSMD6,IRF9,IFITM3,IFI30,BATF,IFITM2,RBCK1,USP18,SAMHD1,LSM14A,PARP14,XAF1,ADIPOR2,PARP9,H3C14,CREBR…
1_Member	GO Biological Processes	GO:0009615	response to virus	-18.1672	-14.6656	39/327	684,1072,1191,2537,2625,2633,2635,3429,3434,3437,3659,3669,3934,3964,3965,4599,4600,4938,4939,4940,5094,5359,6772,6773,7706,8519,8638,10379,10410,10581,10964,11100,25939,26007,26065,55337,80149,81844,83666	BST2,CFL1,CLU,IFI6,GATA3,GBP1,GBP3,IFI27,IFIT1,IFIT3,IRF1,ISG20,LCN2,LGALS8,LGALS9,MX1,MX2,OAS1,OAS2,OAS3,PCBP2,PLSCR1,STAT1,STAT2,TRIM25,IFITM1,OASL,IRF9,IFITM3,IFITM2,IFI44L,HNRNPUL1,SAMHD1,TKFC,LSM14A,SHFL,ZC3H12A,TRIM56,PARP9
1_Member	GO Biological Processes	GO:0034341	response to interferon-gamma	-16.9244	-13.502	30/199	567,684,2633,2635,2934,3105,3106,3107,3123,3133,3659,3965,4938,4939,4940,6772,7706,7726,8519,8638,8942,9111,10379,10410,10437,10581,54625,55337,65010,83666	B2M,BST2,GBP1,GBP3,GSN,HLA-A,HLA-B,HLA-C,HLA-DRB1,HLA-E,IRF1,LGALS9,OAS1,OAS2,OAS3,STAT1,TRIM25,TRIM26,IFITM1,OASL,KYNU,NMI,IRF9,IFITM3,IFI30,IFITM2,PARP14,SHFL,SLC26A6,PARP9
1_Member	GO Biological Processes	GO:0051607	defense response to virus	-16.4632	-13.1078	32/239	684,2537,2633,2635,3429,3434,3437,3659,3669,4599,4600,4938,4939,4940,5094,5359,6772,6773,7706,8519,8638,10379,10410,10581,10964,25939,26007,26065,55337,80149,81844,83666	BST2,IFI6,GBP1,GBP3,IFI27,IFIT1,IFIT3,IRF1,ISG20,MX1,MX2,OAS1,OAS2,OAS3,PCBP2,PLSCR1,STAT1,STAT2,TRIM25,IFITM1,OASL,IRF9,IFITM3,IFITM2,IFI44L,SAMHD1,TKFC,LSM14A,SHFL,ZC3H12A,TRIM56,PARP9
1_Member	GO Biological Processes	GO:0098542	defense response to other organism	-15.9726	-12.6751	48/571	684,2537,2633,2635,3133,3265,3429,3434,3437,3659,3669,3934,3964,4599,4600,4615,4938,4939,4940,5094,5359,5595,6279,6280,6772,6773,6850,7706,8347,8519,8638,10133,10379,10410,10538,10581,10964,25939,26007,26065,55337,57402,80149,81844,83666,85236,90678,140823	BST2,IFI6,GBP1,GBP3,HLA-E,HRAS,IFI27,IFIT1,IFIT3,IRF1,ISG20,LCN2,LGALS8,MX1,MX2,MYD88,OAS1,OAS2,OAS3,PCBP2,PLSCR1,MAPK3,S100A8,S100A9,STAT1,STAT2,SYK,TRIM25,H2BC4,IFITM1,OASL,OPTN,IRF9,IFITM3,BATF,IFITM2,IFI44L,SAMHD1,TKFC,LSM14A,SHFL,S100A14,ZC3H12A,TRIM56,PARP9,H2BC12,LRSAM1,ROMO1
1_Member	GO Biological Processes	GO:0050792	regulation of viral process	-15.4453	-12.1989	29/208	684,972,1072,2040,2934,3429,3434,3669,3965,4599,4938,4940,5359,5432,5438,6772,7251,7706,7726,8519,8638,9830,10410,10581,22880,51652,55337,80149,84875	BST2,CD74,CFL1,STOM,GSN,IFI27,IFIT1,ISG20,LGALS9,MX1,OAS1,OAS3,PLSCR1,POLR2C,POLR2I,STAT1,TSG101,TRIM25,TRIM26,IFITM1,OASL,TRIM14,IFITM3,IFITM2,MORC2,CHMP3,SHFL,ZC3H12A,PARP10
1_Member	GO Biological Processes	GO:0048525	negative regulation of viral process	-15.1079	-11.9073	21/99	684,2934,3434,3669,4599,4938,4940,5359,6772,7706,7726,8519,8638,9830,10410,10581,22880,51652,55337,80149,84875	BST2,GSN,IFIT1,ISG20,MX1,OAS1,OAS3,PLSCR1,STAT1,TRIM25,TRIM26,IFITM1,OASL,TRIM14,IFITM3,IFITM2,MORC2,CHMP3,SHFL,ZC3H12A,PARP10
1_Member	GO Biological Processes	GO:0060333	interferon-gamma-mediated signaling pathway	-14.7351	-11.5759	20/91	567,2633,3105,3106,3107,3123,3133,3659,4938,4939,4940,6772,7706,7726,8638,9111,10379,10437,54625,83666	B2M,GBP1,HLA-A,HLA-B,HLA-C,HLA-DRB1,HLA-E,IRF1,OAS1,OAS2,OAS3,STAT1,TRIM25,TRIM26,OASL,NMI,IRF9,IFI30,PARP14,PARP9
1_Member	GO Biological Processes	GO:0043903	regulation of symbiosis, encompassing mutualism through parasitism	-14.6806	-11.5592	29/222	684,972,1072,2040,2934,3429,3434,3669,3965,4599,4938,4940,5359,5432,5438,6772,7251,7706,7726,8519,8638,9830,10410,10581,22880,51652,55337,80149,84875	BST2,CD74,CFL1,STOM,GSN,IFI27,IFIT1,ISG20,LGALS9,MX1,OAS1,OAS3,PLSCR1,POLR2C,POLR2I,STAT1,TSG101,TRIM25,TRIM26,IFITM1,OASL,TRIM14,IFITM3,IFITM2,MORC2,CHMP3,SHFL,ZC3H12A,PARP10
1_Member	GO Biological Processes	GO:1903900	regulation of viral life cycle	-14.3156	-11.2289	24/149	684,972,2040,2934,3429,3434,3669,3965,4599,4938,4940,5359,7251,7706,7726,8519,8638,10410,10581,22880,51652,55337,80149,84875	BST2,CD74,STOM,GSN,IFI27,IFIT1,ISG20,LGALS9,MX1,OAS1,OAS3,PLSCR1,TSG101,TRIM25,TRIM26,IFITM1,OASL,IFITM3,IFITM2,MORC2,CHMP3,SHFL,ZC3H12A,PARP10
1_Member	GO Biological Processes	GO:1903901	negative regulation of viral life cycle	-14.1733	-11.1189	19/85	684,2934,3434,3669,4599,4938,4940,5359,7706,7726,8519,8638,10410,10581,22880,51652,55337,80149,84875	BST2,GSN,IFIT1,ISG20,MX1,OAS1,OAS3,PLSCR1,TRIM25,TRIM26,IFITM1,OASL,IFITM3,IFITM2,MORC2,CHMP3,SHFL,ZC3H12A,PARP10
1_Member	GO Biological Processes	GO:0043900	regulation of multi-organism process	-13.4424	-10.4459	37/407	684,972,1072,2040,2934,3429,3434,3669,3965,4599,4938,4940,5094,5359,5432,5438,5595,6772,6850,7076,7251,7706,7726,8519,8638,9830,10133,10410,10581,22880,26007,51652,55337,80149,83666,84875,90678	BST2,CD74,CFL1,STOM,GSN,IFI27,IFIT1,ISG20,LGALS9,MX1,OAS1,OAS3,PCBP2,PLSCR1,POLR2C,POLR2I,MAPK3,STAT1,SYK,TIMP1,TSG101,TRIM25,TRIM26,IFITM1,OASL,TRIM14,OPTN,IFITM3,IFITM2,MORC2,TKFC,CHMP3,SHFL,ZC3H12A,PARP9,PARP10,LRSAM1
1_Member	GO Biological Processes	GO:0019058	viral life cycle	-13.2433	-10.2958	33/329	684,950,972,2040,2934,3429,3434,3669,3949,3965,4599,4938,4940,5094,5359,7251,7706,7726,8519,8638,9475,9883,10410,10581,22880,51510,51652,55337,57617,80149,81876,84875,90678	BST2,SCARB2,CD74,STOM,GSN,IFI27,IFIT1,ISG20,LDLR,LGALS9,MX1,OAS1,OAS3,PCBP2,PLSCR1,TSG101,TRIM25,TRIM26,IFITM1,OASL,ROCK2,POM121,IFITM3,IFITM2,MORC2,CHMP5,CHMP3,SHFL,VPS18,ZC3H12A,RAB1B,PARP10,LRSAM1
1_Member	GO Biological Processes	GO:0043901	negative regulation of multi-organism process	-12.9453	-10.0235	24/171	684,2934,3434,3669,4599,4938,4940,5094,5359,6772,7076,7706,7726,8519,8638,9830,10410,10581,22880,26007,51652,55337,80149,84875	BST2,GSN,IFIT1,ISG20,MX1,OAS1,OAS3,PCBP2,PLSCR1,STAT1,TIMP1,TRIM25,TRIM26,IFITM1,OASL,TRIM14,IFITM3,IFITM2,MORC2,TKFC,CHMP3,SHFL,ZC3H12A,PARP10
1_Member	GO Biological Processes	GO:0071346	cellular response to interferon-gamma	-12.4458	-9.56744	24/180	567,2633,2635,2934,3105,3106,3107,3123,3133,3659,3965,4938,4939,4940,6772,7706,7726,8638,9111,10379,10437,54625,65010,83666	B2M,GBP1,GBP3,GSN,HLA-A,HLA-B,HLA-C,HLA-DRB1,HLA-E,IRF1,LGALS9,OAS1,OAS2,OAS3,STAT1,TRIM25,TRIM26,OASL,NMI,IRF9,IFI30,PARP14,SLC26A6,PARP9
1_Member	GO Biological Processes	GO:0045071	negative regulation of viral genome replication	-12.2008	-9.34262	15/59	684,3434,3669,4599,4938,4940,5359,8519,8638,10410,10581,22880,55337,80149,84875	BST2,IFIT1,ISG20,MX1,OAS1,OAS3,PLSCR1,IFITM1,OASL,IFITM3,IFITM2,MORC2,SHFL,ZC3H12A,PARP10
1_Member	GO Biological Processes	GO:0019079	viral genome replication	-11.1908	-8.38816	19/122	684,2040,3429,3434,3669,4599,4938,4940,5094,5359,8519,8638,9475,10410,10581,22880,55337,80149,84875	BST2,STOM,IFI27,IFIT1,ISG20,MX1,OAS1,OAS3,PCBP2,PLSCR1,IFITM1,OASL,ROCK2,IFITM3,IFITM2,MORC2,SHFL,ZC3H12A,PARP10
1_Member	GO Biological Processes	GO:0045069	regulation of viral genome replication	-11.0787	-8.29311	17/95	684,2040,3429,3434,3669,4599,4938,4940,5359,8519,8638,10410,10581,22880,55337,80149,84875	BST2,STOM,IFI27,IFIT1,ISG20,MX1,OAS1,OAS3,PLSCR1,IFITM1,OASL,IFITM3,IFITM2,MORC2,SHFL,ZC3H12A,PARP10
2_Summary	GO Biological Processes	GO:0002478	antigen processing and presentation of exogenous peptide antigen	-13.6412	-10.6167	25/175	160,567,972,1213,1509,1514,1520,1785,3105,3106,3107,3123,3133,5696,5698,5699,5720,5721,6890,6891,6892,9861,9871,10053,10437,1512,2625,246,3659,4092,64332,80149,966,3965,6850,85236,140823,1191,3265,4791,10312,10538,5595,684	AP2A1,B2M,CD74,CLTC,CTSD,CTSL,CTSS,DNM2,HLA-A,HLA-B,HLA-C,HLA-DRB1,HLA-E,PSMB8,PSMB9,PSMB10,PSME1,PSME2,TAP1,TAP2,TAPBP,PSMD6,SEC24D,AP1M2,IFI30,CTSH,GATA3,ALOX15,IRF1,SMAD7,NFKBIZ,ZC3H12A,CD59,LGALS9,SYK,H2BC12,ROMO1,CLU,HRAS,NFKB2,TCIRG1,BATF,MAPK3,BST2
2_Member	GO Biological Processes	GO:0002478	antigen processing and presentation of exogenous peptide antigen	-13.6412	-10.6167	25/175	160,567,972,1213,1509,1514,1520,1785,3105,3106,3107,3123,3133,5696,5698,5699,5720,5721,6890,6891,6892,9861,9871,10053,10437	AP2A1,B2M,CD74,CLTC,CTSD,CTSL,CTSS,DNM2,HLA-A,HLA-B,HLA-C,HLA-DRB1,HLA-E,PSMB8,PSMB9,PSMB10,PSME1,PSME2,TAP1,TAP2,TAPBP,PSMD6,SEC24D,AP1M2,IFI30
2_Member	GO Biological Processes	GO:0019884	antigen processing and presentation of exogenous antigen	-13.2411	-10.2958	25/182	160,567,972,1213,1509,1514,1520,1785,3105,3106,3107,3123,3133,5696,5698,5699,5720,5721,6890,6891,6892,9861,9871,10053,10437	AP2A1,B2M,CD74,CLTC,CTSD,CTSL,CTSS,DNM2,HLA-A,HLA-B,HLA-C,HLA-DRB1,HLA-E,PSMB8,PSMB9,PSMB10,PSME1,PSME2,TAP1,TAP2,TAPBP,PSMD6,SEC24D,AP1M2,IFI30
2_Member	GO Biological Processes	GO:0048002	antigen processing and presentation of peptide antigen	-12.8065	-9.90692	25/190	160,567,972,1213,1509,1514,1520,1785,3105,3106,3107,3123,3133,5696,5698,5699,5720,5721,6890,6891,6892,9861,9871,10053,10437	AP2A1,B2M,CD74,CLTC,CTSD,CTSL,CTSS,DNM2,HLA-A,HLA-B,HLA-C,HLA-DRB1,HLA-E,PSMB8,PSMB9,PSMB10,PSME1,PSME2,TAP1,TAP2,TAPBP,PSMD6,SEC24D,AP1M2,IFI30
2_Member	GO Biological Processes	GO:0019882	antigen processing and presentation	-11.8692	-9.04887	26/227	160,567,972,1213,1509,1512,1514,1520,1785,3105,3106,3107,3123,3133,5696,5698,5699,5720,5721,6890,6891,6892,9861,9871,10053,10437	AP2A1,B2M,CD74,CLTC,CTSD,CTSH,CTSL,CTSS,DNM2,HLA-A,HLA-B,HLA-C,HLA-DRB1,HLA-E,PSMB8,PSMB9,PSMB10,PSME1,PSME2,TAP1,TAP2,TAPBP,PSMD6,SEC24D,AP1M2,IFI30
2_Member	GO Biological Processes	GO:0042590	antigen processing and presentation of exogenous peptide antigen via MHC class I	-10.2324	-7.46318	15/79	567,3105,3106,3107,3133,5696,5698,5699,5720,5721,6890,6891,6892,9861,10437	B2M,HLA-A,HLA-B,HLA-C,HLA-E,PSMB8,PSMB9,PSMB10,PSME1,PSME2,TAP1,TAP2,TAPBP,PSMD6,IFI30
2_Member	GO Biological Processes	GO:0002474	antigen processing and presentation of peptide antigen via MHC class I	-9.90752	-7.16934	16/97	567,3105,3106,3107,3133,5696,5698,5699,5720,5721,6890,6891,6892,9861,9871,10437	B2M,HLA-A,HLA-B,HLA-C,HLA-E,PSMB8,PSMB9,PSMB10,PSME1,PSME2,TAP1,TAP2,TAPBP,PSMD6,SEC24D,IFI30
2_Member	GO Biological Processes	GO:0002483	antigen processing and presentation of endogenous peptide antigen	-9.79176	-7.08254	8/15	567,3105,3106,3107,3133,6890,6891,6892	B2M,HLA-A,HLA-B,HLA-C,HLA-E,TAP1,TAP2,TAPBP
2_Member	GO Biological Processes	GO:0019885	antigen processing and presentation of endogenous peptide antigen via MHC class I	-9.79176	-7.08254	8/15	567,3105,3106,3107,3133,6890,6891,6892	B2M,HLA-A,HLA-B,HLA-C,HLA-E,TAP1,TAP2,TAPBP
2_Member	GO Biological Processes	GO:0019883	antigen processing and presentation of endogenous antigen	-9.64866	-6.95323	9/22	567,972,3105,3106,3107,3133,6890,6891,6892	B2M,CD74,HLA-A,HLA-B,HLA-C,HLA-E,TAP1,TAP2,TAPBP
2_Member	GO Biological Processes	GO:0002479	antigen processing and presentation of exogenous peptide antigen via MHC class I, TAP-dependent	-9.48728	-6.80521	14/75	567,3105,3106,3107,3133,5696,5698,5699,5720,5721,6890,6891,6892,9861	B2M,HLA-A,HLA-B,HLA-C,HLA-E,PSMB8,PSMB9,PSMB10,PSME1,PSME2,TAP1,TAP2,TAPBP,PSMD6
2_Member	GO Biological Processes	GO:0002428	antigen processing and presentation of peptide antigen via MHC class Ib	-8.25239	-5.62001	6/9	567,3105,3106,3107,3133,6891	B2M,HLA-A,HLA-B,HLA-C,HLA-E,TAP2
2_Member	GO Biological Processes	GO:0002476	antigen processing and presentation of endogenous peptide antigen via MHC class Ib	-6.73339	-4.29624	5/8	3105,3106,3107,3133,6891	HLA-A,HLA-B,HLA-C,HLA-E,TAP2
2_Member	GO Biological Processes	GO:0002480	antigen processing and presentation of exogenous peptide antigen via MHC class I, TAP-independent	-6.38857	-4.04741	5/9	567,3105,3106,3107,3133	B2M,HLA-A,HLA-B,HLA-C,HLA-E
2_Member	GO Biological Processes	GO:0002475	antigen processing and presentation via MHC class Ib	-6.32604	-4.00686	6/16	567,3105,3106,3107,3133,6891	B2M,HLA-A,HLA-B,HLA-C,HLA-E,TAP2
2_Member	GO Biological Processes	GO:0002484	antigen processing and presentation of endogenous peptide antigen via MHC class I via ER pathway	-5.24303	-3.0903	4/7	3105,3106,3107,3133	HLA-A,HLA-B,HLA-C,HLA-E
2_Member	GO Biological Processes	GO:0002486	antigen processing and presentation of endogenous peptide antigen via MHC class I via ER pathway, TA	-5.24303	-3.0903	4/7	3105,3106,3107,3133	HLA-A,HLA-B,HLA-C,HLA-E
2_Member	GO Biological Processes	GO:0001916	positive regulation of T cell mediated cytotoxicity	-3.79552	-1.97164	5/26	567,3105,3106,3107,3133	B2M,HLA-A,HLA-B,HLA-C,HLA-E
2_Member	GO Biological Processes	GO:0002711	positive regulation of T cell mediated immunity	-3.38082	-1.65881	6/48	567,2625,3105,3106,3107,3133	B2M,GATA3,HLA-A,HLA-B,HLA-C,HLA-E
2_Member	GO Biological Processes	GO:0002819	regulation of adaptive immune response	-3.33332	-1.62551	11/160	246,567,2625,3105,3106,3107,3133,3659,4092,64332,80149	ALOX15,B2M,GATA3,HLA-A,HLA-B,HLA-C,HLA-E,IRF1,SMAD7,NFKBIZ,ZC3H12A
2_Member	GO Biological Processes	GO:0001914	regulation of T cell mediated cytotoxicity	-3.28929	-1.59114	5/33	567,3105,3106,3107,3133	B2M,HLA-A,HLA-B,HLA-C,HLA-E
2_Member	GO Biological Processes	GO:0002709	regulation of T cell mediated immunity	-3.25263	-1.56574	7/70	567,2625,3105,3106,3107,3133,4092	B2M,GATA3,HLA-A,HLA-B,HLA-C,HLA-E,SMAD7
2_Member	GO Biological Processes	GO:0001913	T cell mediated cytotoxicity	-3.23658	-1.55188	6/51	567,1512,3105,3106,3107,3133	B2M,CTSH,HLA-A,HLA-B,HLA-C,HLA-E
2_Member	GO Biological Processes	GO:0001906	cell killing	-3.07136	-1.42866	11/172	567,966,1512,3105,3106,3107,3133,3965,6850,85236,140823	B2M,CD59,CTSH,HLA-A,HLA-B,HLA-C,HLA-E,LGALS9,SYK,H2BC12,ROMO1
2_Member	GO Biological Processes	GO:0031341	regulation of cell killing	-2.96043	-1.35645	8/101	567,966,3105,3106,3107,3133,3965,6850	B2M,CD59,HLA-A,HLA-B,HLA-C,HLA-E,LGALS9,SYK
2_Member	GO Biological Processes	GO:0002456	T cell mediated immunity	-2.77298	-1.21585	8/108	567,1512,2625,3105,3106,3107,3133,4092	B2M,CTSH,GATA3,HLA-A,HLA-B,HLA-C,HLA-E,SMAD7
2_Member	GO Biological Processes	GO:0031343	positive regulation of cell killing	-2.57908	-1.06245	6/68	567,3105,3106,3107,3133,6850	B2M,HLA-A,HLA-B,HLA-C,HLA-E,SYK
2_Member	GO Biological Processes	GO:0002822	regulation of adaptive immune response based on somatic recombination of immune receptors built from	-2.52258	-1.01923	9/145	567,2625,3105,3106,3107,3133,4092,64332,80149	B2M,GATA3,HLA-A,HLA-B,HLA-C,HLA-E,SMAD7,NFKBIZ,ZC3H12A
2_Member	GO Biological Processes	GO:0002460	adaptive immune response based on somatic recombination of immune receptors built from immunoglobuli	-2.46113	-0.982365	16/363	567,972,1191,1512,2625,3105,3106,3107,3133,3265,4092,4791,10312,10538,64332,80149	B2M,CD74,CLU,CTSH,GATA3,HLA-A,HLA-B,HLA-C,HLA-E,HRAS,SMAD7,NFKB2,TCIRG1,BATF,NFKBIZ,ZC3H12A
2_Member	GO Biological Processes	GO:0002824	positive regulation of adaptive immune response based on somatic recombination of immune receptors b	-2.35334	-0.911673	7/100	567,2625,3105,3106,3107,3133,64332	B2M,GATA3,HLA-A,HLA-B,HLA-C,HLA-E,NFKBIZ
2_Member	GO Biological Processes	GO:0001910	regulation of leukocyte mediated cytotoxicity	-2.28245	-0.858527	6/78	567,3105,3106,3107,3133,3965	B2M,HLA-A,HLA-B,HLA-C,HLA-E,LGALS9
2_Member	GO Biological Processes	GO:0002699	positive regulation of immune effector process	-2.25422	-0.846737	11/219	567,972,2625,3105,3106,3107,3133,3965,5595,6850,64332	B2M,CD74,GATA3,HLA-A,HLA-B,HLA-C,HLA-E,LGALS9,MAPK3,SYK,NFKBIZ
2_Member	GO Biological Processes	GO:0001912	positive regulation of leukocyte mediated cytotoxicity	-2.24898	-0.844973	5/56	567,3105,3106,3107,3133	B2M,HLA-A,HLA-B,HLA-C,HLA-E
2_Member	GO Biological Processes	GO:0002821	positive regulation of adaptive immune response	-2.23796	-0.836681	7/105	567,2625,3105,3106,3107,3133,64332	B2M,GATA3,HLA-A,HLA-B,HLA-C,HLA-E,NFKBIZ
2_Member	GO Biological Processes	GO:0001909	leukocyte mediated cytotoxicity	-2.17226	-0.793856	7/108	567,1512,3105,3106,3107,3133,3965	B2M,CTSH,HLA-A,HLA-B,HLA-C,HLA-E,LGALS9
2_Member	GO Biological Processes	GO:0002250	adaptive immune response	-2.16063	-0.784178	24/679	246,567,972,1191,1512,1514,1520,2625,3105,3106,3107,3123,3133,3265,3659,4092,4791,6850,6890,6891,10312,10538,64332,80149	ALOX15,B2M,CD74,CLU,CTSH,CTSL,CTSS,GATA3,HLA-A,HLA-B,HLA-C,HLA-DRB1,HLA-E,HRAS,IRF1,SMAD7,NFKB2,SYK,TAP1,TAP2,TCIRG1,BATF,NFKBIZ,ZC3H12A
2_Member	GO Biological Processes	GO:0002703	regulation of leukocyte mediated immunity	-2.02543	-0.691141	10/204	567,684,2625,3105,3106,3107,3133,3965,4092,6850	B2M,BST2,GATA3,HLA-A,HLA-B,HLA-C,HLA-E,LGALS9,SMAD7,SYK
2_Member	GO Biological Processes	GO:0002706	regulation of lymphocyte mediated immunity	-1.93412	-0.625642	8/149	567,2625,3105,3106,3107,3133,3965,4092	B2M,GATA3,HLA-A,HLA-B,HLA-C,HLA-E,LGALS9,SMAD7
2_Member	GO Biological Processes	GO:0002705	positive regulation of leukocyte mediated immunity	-1.70895	-0.464063	7/133	567,2625,3105,3106,3107,3133,6850	B2M,GATA3,HLA-A,HLA-B,HLA-C,HLA-E,SYK
2_Member	GO Biological Processes	GO:0002708	positive regulation of lymphocyte mediated immunity	-1.68313	-0.444924	6/105	567,2625,3105,3106,3107,3133	B2M,GATA3,HLA-A,HLA-B,HLA-C,HLA-E
2_Member	GO Biological Processes	GO:0002449	lymphocyte mediated immunity	-1.51893	-0.333298	13/353	567,972,1191,1512,2625,3105,3106,3107,3133,3965,4092,10312,10538	B2M,CD74,CLU,CTSH,GATA3,HLA-A,HLA-B,HLA-C,HLA-E,LGALS9,SMAD7,TCIRG1,BATF
3_Summary	GO Biological Processes	GO:0044257	cellular protein catabolic process	-12.1572	-9.31837	50/773	160,207,267,1191,1213,1452,1512,1514,1520,1649,3300,3429,3949,4092,5094,5516,5696,5698,5699,5720,5721,5747,5962,6386,6478,7251,7706,8237,8878,9246,9320,9861,10040,10312,10425,10616,11274,23032,26263,27131,29954,54602,54894,59342,80344,81502,84447,84669,93974,123803,215,4343,5595,5976,7249,9475,10133,26353,80149,90678,4008,9111,81844,84875,4088,4194,5300,7076	AP2A1,AKT1,AMFR,CLU,CLTC,CSNK1A1,CTSH,CTSL,CTSS,DDIT3,DNAJB2,IFI27,LDLR,SMAD7,PCBP2,PPP2CB,PSMB8,PSMB9,PSMB10,PSME1,PSME2,PTK2,RDX,SDCBP,SIAH2,TSG101,TRIM25,USP11,SQSTM1,UBE2L6,TRIP12,PSMD6,TOM1L1,TCIRG1,ARIH2,RBCK1,USP18,USP33,FBXO22,SNX5,POMT2,NDFIP2,RNF43,SCPEP1,DCAF11,HM13,SYVN1,USP32,ATP5IF1,NTAN1,ABCD1,MOV10,MAPK3,UPF1,TSC2,ROCK2,OPTN,HSPB8,ZC3H12A,LRSAM1,LMO7,NMI,TRIM56,PARP10,SMAD3,MDM4,P…
3_Member	GO Biological Processes	GO:0044257	cellular protein catabolic process	-12.1572	-9.31837	50/773	160,207,267,1191,1213,1452,1512,1514,1520,1649,3300,3429,3949,4092,5094,5516,5696,5698,5699,5720,5721,5747,5962,6386,6478,7251,7706,8237,8878,9246,9320,9861,10040,10312,10425,10616,11274,23032,26263,27131,29954,54602,54894,59342,80344,81502,84447,84669,93974,123803	AP2A1,AKT1,AMFR,CLU,CLTC,CSNK1A1,CTSH,CTSL,CTSS,DDIT3,DNAJB2,IFI27,LDLR,SMAD7,PCBP2,PPP2CB,PSMB8,PSMB9,PSMB10,PSME1,PSME2,PTK2,RDX,SDCBP,SIAH2,TSG101,TRIM25,USP11,SQSTM1,UBE2L6,TRIP12,PSMD6,TOM1L1,TCIRG1,ARIH2,RBCK1,USP18,USP33,FBXO22,SNX5,POMT2,NDFIP2,RNF43,SCPEP1,DCAF11,HM13,SYVN1,USP32,ATP5IF1,NTAN1
3_Member	GO Biological Processes	GO:0051603	proteolysis involved in cellular protein catabolic process	-9.98118	-7.22776	44/718	207,267,1191,1452,1512,1514,1520,1649,3300,3429,4092,5094,5516,5696,5698,5699,5720,5721,5747,6386,6478,7251,7706,8237,8878,9246,9320,9861,10040,10425,10616,11274,23032,26263,29954,54602,54894,59342,80344,81502,84447,84669,93974,123803	AKT1,AMFR,CLU,CSNK1A1,CTSH,CTSL,CTSS,DDIT3,DNAJB2,IFI27,SMAD7,PCBP2,PPP2CB,PSMB8,PSMB9,PSMB10,PSME1,PSME2,PTK2,SDCBP,SIAH2,TSG101,TRIM25,USP11,SQSTM1,UBE2L6,TRIP12,PSMD6,TOM1L1,ARIH2,RBCK1,USP18,USP33,FBXO22,POMT2,NDFIP2,RNF43,SCPEP1,DCAF11,HM13,SYVN1,USP32,ATP5IF1,NTAN1
3_Member	GO Biological Processes	GO:0006511	ubiquitin-dependent protein catabolic process	-8.10477	-5.49526	37/623	207,267,1191,1452,1649,3300,3429,4092,5094,5516,5696,5698,5699,5720,5721,5747,6386,6478,7251,7706,8237,8878,9246,9320,9861,10040,10425,10616,11274,23032,26263,54602,54894,80344,84447,84669,123803	AKT1,AMFR,CLU,CSNK1A1,DDIT3,DNAJB2,IFI27,SMAD7,PCBP2,PPP2CB,PSMB8,PSMB9,PSMB10,PSME1,PSME2,PTK2,SDCBP,SIAH2,TSG101,TRIM25,USP11,SQSTM1,UBE2L6,TRIP12,PSMD6,TOM1L1,ARIH2,RBCK1,USP18,USP33,FBXO22,NDFIP2,RNF43,DCAF11,SYVN1,USP32,NTAN1
3_Member	GO Biological Processes	GO:0019941	modification-dependent protein catabolic process	-7.9952	-5.40741	37/629	207,267,1191,1452,1649,3300,3429,4092,5094,5516,5696,5698,5699,5720,5721,5747,6386,6478,7251,7706,8237,8878,9246,9320,9861,10040,10425,10616,11274,23032,26263,54602,54894,80344,84447,84669,123803	AKT1,AMFR,CLU,CSNK1A1,DDIT3,DNAJB2,IFI27,SMAD7,PCBP2,PPP2CB,PSMB8,PSMB9,PSMB10,PSME1,PSME2,PTK2,SDCBP,SIAH2,TSG101,TRIM25,USP11,SQSTM1,UBE2L6,TRIP12,PSMD6,TOM1L1,ARIH2,RBCK1,USP18,USP33,FBXO22,NDFIP2,RNF43,DCAF11,SYVN1,USP32,NTAN1
3_Member	GO Biological Processes	GO:0043632	modification-dependent macromolecule catabolic process	-7.79835	-5.22102	37/640	207,267,1191,1452,1649,3300,3429,4092,5094,5516,5696,5698,5699,5720,5721,5747,6386,6478,7251,7706,8237,8878,9246,9320,9861,10040,10425,10616,11274,23032,26263,54602,54894,80344,84447,84669,123803	AKT1,AMFR,CLU,CSNK1A1,DDIT3,DNAJB2,IFI27,SMAD7,PCBP2,PPP2CB,PSMB8,PSMB9,PSMB10,PSME1,PSME2,PTK2,SDCBP,SIAH2,TSG101,TRIM25,USP11,SQSTM1,UBE2L6,TRIP12,PSMD6,TOM1L1,ARIH2,RBCK1,USP18,USP33,FBXO22,NDFIP2,RNF43,DCAF11,SYVN1,USP32,NTAN1
3_Member	GO Biological Processes	GO:0010498	proteasomal protein catabolic process	-5.18588	-3.046	26/477	207,267,1191,1452,1649,3300,3429,4092,5094,5516,5696,5698,5699,5720,5721,6386,6478,7706,9861,10425,10616,26263,29954,80344,81502,84447	AKT1,AMFR,CLU,CSNK1A1,DDIT3,DNAJB2,IFI27,SMAD7,PCBP2,PPP2CB,PSMB8,PSMB9,PSMB10,PSME1,PSME2,SDCBP,SIAH2,TRIM25,PSMD6,ARIH2,RBCK1,FBXO22,POMT2,DCAF11,HM13,SYVN1
3_Member	GO Biological Processes	GO:0043161	proteasome-mediated ubiquitin-dependent protein catabolic process	-5.17195	-3.03583	24/420	207,267,1191,1452,1649,3300,3429,4092,5094,5516,5696,5698,5699,5720,5721,6386,6478,7706,9861,10425,10616,26263,80344,84447	AKT1,AMFR,CLU,CSNK1A1,DDIT3,DNAJB2,IFI27,SMAD7,PCBP2,PPP2CB,PSMB8,PSMB9,PSMB10,PSME1,PSME2,SDCBP,SIAH2,TRIM25,PSMD6,ARIH2,RBCK1,FBXO22,DCAF11,SYVN1
3_Member	GO Biological Processes	GO:0031331	positive regulation of cellular catabolic process	-4.69606	-2.65686	21/362	207,215,1191,1452,3300,3949,4092,4343,5595,5747,5962,5976,7249,9475,10133,10425,26263,26353,80149,90678,93974	AKT1,ABCD1,CLU,CSNK1A1,DNAJB2,LDLR,SMAD7,MOV10,MAPK3,PTK2,RDX,UPF1,TSC2,ROCK2,OPTN,ARIH2,FBXO22,HSPB8,ZC3H12A,LRSAM1,ATP5IF1
3_Member	GO Biological Processes	GO:0000209	protein polyubiquitination	-4.63	-2.59377	19/310	267,3429,4008,5696,5698,5699,5720,5721,6478,9111,9320,9861,10425,10616,26263,81844,84447,84875,90678	AMFR,IFI27,LMO7,PSMB8,PSMB9,PSMB10,PSME1,PSME2,SIAH2,NMI,TRIP12,PSMD6,ARIH2,RBCK1,FBXO22,TRIM56,SYVN1,PARP10,LRSAM1
3_Member	GO Biological Processes	GO:1903364	positive regulation of cellular protein catabolic process	-3.80849	-1.97379	11/141	207,1191,1452,3300,3949,4092,5747,5962,10425,26263,93974	AKT1,CLU,CSNK1A1,DNAJB2,LDLR,SMAD7,PTK2,RDX,ARIH2,FBXO22,ATP5IF1
3_Member	GO Biological Processes	GO:0009896	positive regulation of catabolic process	-3.72038	-1.916	21/424	207,215,1191,1452,3300,3949,4092,4343,5595,5747,5962,5976,7249,9475,10133,10425,26263,26353,80149,90678,93974	AKT1,ABCD1,CLU,CSNK1A1,DNAJB2,LDLR,SMAD7,MOV10,MAPK3,PTK2,RDX,UPF1,TSC2,ROCK2,OPTN,ARIH2,FBXO22,HSPB8,ZC3H12A,LRSAM1,ATP5IF1
3_Member	GO Biological Processes	GO:1903362	regulation of cellular protein catabolic process	-3.22478	-1.54795	14/247	207,1191,1452,3300,3949,4092,5720,5721,5747,5962,6386,10425,26263,93974	AKT1,CLU,CSNK1A1,DNAJB2,LDLR,SMAD7,PSME1,PSME2,PTK2,RDX,SDCBP,ARIH2,FBXO22,ATP5IF1
3_Member	GO Biological Processes	GO:2000060	positive regulation of ubiquitin-dependent protein catabolic process	-3.07541	-1.42993	8/97	207,1191,1452,3300,4092,5747,10425,26263	AKT1,CLU,CSNK1A1,DNAJB2,SMAD7,PTK2,ARIH2,FBXO22
3_Member	GO Biological Processes	GO:1903052	positive regulation of proteolysis involved in cellular protein catabolic process	-3.06683	-1.42615	9/121	207,1191,1452,3300,4092,5747,10425,26263,93974	AKT1,CLU,CSNK1A1,DNAJB2,SMAD7,PTK2,ARIH2,FBXO22,ATP5IF1
3_Member	GO Biological Processes	GO:0042176	regulation of protein catabolic process	-3.03469	-1.40699	18/381	207,1191,1452,3300,3949,4088,4092,4194,5300,5720,5721,5747,5962,6386,7076,10425,26263,93974	AKT1,CLU,CSNK1A1,DNAJB2,LDLR,SMAD3,SMAD7,MDM4,PIN1,PSME1,PSME2,PTK2,RDX,SDCBP,TIMP1,ARIH2,FBXO22,ATP5IF1
3_Member	GO Biological Processes	GO:0032436	positive regulation of proteasomal ubiquitin-dependent protein catabolic process	-2.84218	-1.26897	7/82	207,1191,1452,3300,4092,10425,26263	AKT1,CLU,CSNK1A1,DNAJB2,SMAD7,ARIH2,FBXO22
3_Member	GO Biological Processes	GO:1903050	regulation of proteolysis involved in cellular protein catabolic process	-2.78678	-1.22469	12/215	207,1191,1452,3300,4092,5720,5721,5747,6386,10425,26263,93974	AKT1,CLU,CSNK1A1,DNAJB2,SMAD7,PSME1,PSME2,PTK2,SDCBP,ARIH2,FBXO22,ATP5IF1
3_Member	GO Biological Processes	GO:0032434	regulation of proteasomal ubiquitin-dependent protein catabolic process	-2.42119	-0.958598	8/123	207,1191,1452,3300,4092,6386,10425,26263	AKT1,CLU,CSNK1A1,DNAJB2,SMAD7,SDCBP,ARIH2,FBXO22
3_Member	GO Biological Processes	GO:2000058	regulation of ubiquitin-dependent protein catabolic process	-2.40581	-0.951872	9/151	207,1191,1452,3300,4092,5747,6386,10425,26263	AKT1,CLU,CSNK1A1,DNAJB2,SMAD7,PTK2,SDCBP,ARIH2,FBXO22
3_Member	GO Biological Processes	GO:0061136	regulation of proteasomal protein catabolic process	-2.34627	-0.906116	10/183	207,1191,1452,3300,4092,5720,5721,6386,10425,26263	AKT1,CLU,CSNK1A1,DNAJB2,SMAD7,PSME1,PSME2,SDCBP,ARIH2,FBXO22
3_Member	GO Biological Processes	GO:0045732	positive regulation of protein catabolic process	-2.3132	-0.882738	11/215	207,1191,1452,3300,3949,4092,5747,5962,10425,26263,93974	AKT1,CLU,CSNK1A1,DNAJB2,LDLR,SMAD7,PTK2,RDX,ARIH2,FBXO22,ATP5IF1
3_Member	GO Biological Processes	GO:1901800	positive regulation of proteasomal protein catabolic process	-2.26043	-0.850825	7/104	207,1191,1452,3300,4092,10425,26263	AKT1,CLU,CSNK1A1,DNAJB2,SMAD7,ARIH2,FBXO22
4_Summary	GO Biological Processes	GO:0006914	autophagy	-8.8935	-6.237	34/503	207,527,823,1191,1213,1649,3312,3964,5595,5747,6279,6280,6720,7009,7249,7251,8878,10133,10312,23032,26353,27131,29919,51606,51652,55332,57617,64223,79065,80149,81876,90678,93974,153129	AKT1,ATP6V0C,CAPN1,CLU,CLTC,DDIT3,HSPA8,LGALS8,MAPK3,PTK2,S100A8,S100A9,SREBF1,TMBIM6,TSC2,TSG101,SQSTM1,OPTN,TCIRG1,USP33,HSPB8,SNX5,RMC1,ATP6V1H,CHMP3,DRAM1,VPS18,MLST8,ATG9A,ZC3H12A,RAB1B,LRSAM1,ATP5IF1,SLC38A9
4_Member	GO Biological Processes	GO:0006914	autophagy	-8.8935	-6.237	34/503	207,527,823,1191,1213,1649,3312,3964,5595,5747,6279,6280,6720,7009,7249,7251,8878,10133,10312,23032,26353,27131,29919,51606,51652,55332,57617,64223,79065,80149,81876,90678,93974,153129	AKT1,ATP6V0C,CAPN1,CLU,CLTC,DDIT3,HSPA8,LGALS8,MAPK3,PTK2,S100A8,S100A9,SREBF1,TMBIM6,TSC2,TSG101,SQSTM1,OPTN,TCIRG1,USP33,HSPB8,SNX5,RMC1,ATP6V1H,CHMP3,DRAM1,VPS18,MLST8,ATG9A,ZC3H12A,RAB1B,LRSAM1,ATP5IF1,SLC38A9
4_Member	GO Biological Processes	GO:0061919	process utilizing autophagic mechanism	-8.8935	-6.237	34/503	207,527,823,1191,1213,1649,3312,3964,5595,5747,6279,6280,6720,7009,7249,7251,8878,10133,10312,23032,26353,27131,29919,51606,51652,55332,57617,64223,79065,80149,81876,90678,93974,153129	AKT1,ATP6V0C,CAPN1,CLU,CLTC,DDIT3,HSPA8,LGALS8,MAPK3,PTK2,S100A8,S100A9,SREBF1,TMBIM6,TSC2,TSG101,SQSTM1,OPTN,TCIRG1,USP33,HSPB8,SNX5,RMC1,ATP6V1H,CHMP3,DRAM1,VPS18,MLST8,ATG9A,ZC3H12A,RAB1B,LRSAM1,ATP5IF1,SLC38A9
4_Member	GO Biological Processes	GO:0010506	regulation of autophagy	-5.30487	-3.13368	21/330	207,527,823,1649,5595,5747,6720,7249,10133,23032,26353,27131,29919,51606,55332,64223,80149,81876,90678,93974,153129	AKT1,ATP6V0C,CAPN1,DDIT3,MAPK3,PTK2,SREBF1,TSC2,OPTN,USP33,HSPB8,SNX5,RMC1,ATP6V1H,DRAM1,MLST8,ZC3H12A,RAB1B,LRSAM1,ATP5IF1,SLC38A9
4_Member	GO Biological Processes	GO:0016236	macroautophagy	-4.82766	-2.75742	19/300	207,527,823,3964,5595,7249,7251,8878,10133,10312,26353,27131,51606,51652,64223,79065,81876,90678,153129	AKT1,ATP6V0C,CAPN1,LGALS8,MAPK3,TSC2,TSG101,SQSTM1,OPTN,TCIRG1,HSPB8,SNX5,ATP6V1H,CHMP3,MLST8,ATG9A,RAB1B,LRSAM1,SLC38A9
4_Member	GO Biological Processes	GO:0098792	xenophagy	-4.70088	-2.65866	4/9	3964,5595,10133,90678	LGALS8,MAPK3,OPTN,LRSAM1
4_Member	GO Biological Processes	GO:0016241	regulation of macroautophagy	-4.2799	-2.32236	13/171	207,527,823,5595,7249,10133,26353,27131,51606,64223,81876,90678,153129	AKT1,ATP6V0C,CAPN1,MAPK3,TSC2,OPTN,HSPB8,SNX5,ATP6V1H,MLST8,RAB1B,LRSAM1,SLC38A9
4_Member	GO Biological Processes	GO:0061912	selective autophagy	-4.17979	-2.25567	7/50	3964,5595,7249,8878,10133,26353,90678	LGALS8,MAPK3,TSC2,SQSTM1,OPTN,HSPB8,LRSAM1
4_Member	GO Biological Processes	GO:1904415	regulation of xenophagy	-3.792	-1.97164	3/6	5595,10133,90678	MAPK3,OPTN,LRSAM1
4_Member	GO Biological Processes	GO:1904417	positive regulation of xenophagy	-3.792	-1.97164	3/6	5595,10133,90678	MAPK3,OPTN,LRSAM1
4_Member	GO Biological Processes	GO:0010508	positive regulation of autophagy	-1.9894	-0.665615	7/117	5595,7249,10133,26353,80149,90678,93974	MAPK3,TSC2,OPTN,HSPB8,ZC3H12A,LRSAM1,ATP5IF1
4_Member	GO Biological Processes	GO:0016239	positive regulation of macroautophagy	-1.89893	-0.60199	5/68	5595,7249,10133,26353,90678	MAPK3,TSC2,OPTN,HSPB8,LRSAM1
5_Summary	GO Biological Processes	GO:0045088	regulation of innate immune response	-8.25982	-5.62001	31/454	1514,1520,3133,3265,3659,3965,4582,4615,4792,5058,5359,5696,5698,5699,5720,5721,6197,6279,6280,6772,6850,9111,9861,10906,11274,25939,26007,26065,54625,57402,83666,1512,2625,2633,3123,4690,5530,5595,5747,5879,10616,64332,80149,147179,629,966,1191,3949,10133,90678	CTSL,CTSS,HLA-E,HRAS,IRF1,LGALS9,MUC1,MYD88,NFKBIA,PAK1,PLSCR1,PSMB8,PSMB9,PSMB10,PSME1,PSME2,RPS6KA3,S100A8,S100A9,STAT1,SYK,NMI,PSMD6,TRAFD1,USP18,SAMHD1,TKFC,LSM14A,PARP14,S100A14,PARP9,CTSH,GATA3,GBP1,HLA-DRB1,NCK1,PPP3CA,MAPK3,PTK2,RAC1,RBCK1,NFKBIZ,ZC3H12A,WIPF2,CFB,CD59,CLU,LDLR,OPTN,LRSAM1
5_Member	GO Biological Processes	GO:0045088	regulation of innate immune response	-8.25982	-5.62001	31/454	1514,1520,3133,3265,3659,3965,4582,4615,4792,5058,5359,5696,5698,5699,5720,5721,6197,6279,6280,6772,6850,9111,9861,10906,11274,25939,26007,26065,54625,57402,83666	CTSL,CTSS,HLA-E,HRAS,IRF1,LGALS9,MUC1,MYD88,NFKBIA,PAK1,PLSCR1,PSMB8,PSMB9,PSMB10,PSME1,PSME2,RPS6KA3,S100A8,S100A9,STAT1,SYK,NMI,PSMD6,TRAFD1,USP18,SAMHD1,TKFC,LSM14A,PARP14,S100A14,PARP9
5_Member	GO Biological Processes	GO:0002764	immune response-regulating signaling pathway	-6.68674	-4.25702	36/678	1512,1514,1520,2625,2633,3123,3265,3659,3965,4582,4615,4690,4792,5058,5359,5530,5595,5696,5698,5699,5720,5721,5747,5879,6197,6279,6280,6850,9861,10616,26007,26065,57402,64332,80149,147179	CTSH,CTSL,CTSS,GATA3,GBP1,HLA-DRB1,HRAS,IRF1,LGALS9,MUC1,MYD88,NCK1,NFKBIA,PAK1,PLSCR1,PPP3CA,MAPK3,PSMB8,PSMB9,PSMB10,PSME1,PSME2,PTK2,RAC1,RPS6KA3,S100A8,S100A9,SYK,PSMD6,RBCK1,TKFC,LSM14A,S100A14,NFKBIZ,ZC3H12A,WIPF2
5_Member	GO Biological Processes	GO:0002758	innate immune response-activating signal transduction	-6.53226	-4.13103	22/301	1514,1520,3265,3659,3965,4582,4615,4792,5058,5696,5698,5699,5720,5721,6197,6279,6280,6850,9861,26007,26065,57402	CTSL,CTSS,HRAS,IRF1,LGALS9,MUC1,MYD88,NFKBIA,PAK1,PSMB8,PSMB9,PSMB10,PSME1,PSME2,RPS6KA3,S100A8,S100A9,SYK,PSMD6,TKFC,LSM14A,S100A14
5_Member	GO Biological Processes	GO:0002253	activation of immune response	-6.40606	-4.05058	37/727	629,966,1191,1514,1520,2625,2633,3123,3265,3659,3965,4582,4615,4690,4792,5058,5359,5595,5696,5698,5699,5720,5721,5747,5879,6197,6279,6280,6850,9861,10616,26007,26065,57402,64332,80149,147179	CFB,CD59,CLU,CTSL,CTSS,GATA3,GBP1,HLA-DRB1,HRAS,IRF1,LGALS9,MUC1,MYD88,NCK1,NFKBIA,PAK1,PLSCR1,MAPK3,PSMB8,PSMB9,PSMB10,PSME1,PSME2,PTK2,RAC1,RPS6KA3,S100A8,S100A9,SYK,PSMD6,RBCK1,TKFC,LSM14A,S100A14,NFKBIZ,ZC3H12A,WIPF2
5_Member	GO Biological Processes	GO:0045089	positive regulation of innate immune response	-6.38466	-4.04741	25/384	1514,1520,3133,3265,3659,3965,4582,4615,4792,5058,5359,5696,5698,5699,5720,5721,6197,6279,6280,6850,9861,26007,26065,57402,83666	CTSL,CTSS,HLA-E,HRAS,IRF1,LGALS9,MUC1,MYD88,NFKBIA,PAK1,PLSCR1,PSMB8,PSMB9,PSMB10,PSME1,PSME2,RPS6KA3,S100A8,S100A9,SYK,PSMD6,TKFC,LSM14A,S100A14,PARP9
5_Member	GO Biological Processes	GO:0031349	positive regulation of defense response	-6.33682	-4.01131	30/524	1514,1520,3133,3265,3659,3949,3965,4582,4615,4792,5058,5359,5595,5696,5698,5699,5720,5721,6197,6279,6280,6850,9861,10133,26007,26065,57402,64332,83666,90678	CTSL,CTSS,HLA-E,HRAS,IRF1,LDLR,LGALS9,MUC1,MYD88,NFKBIA,PAK1,PLSCR1,MAPK3,PSMB8,PSMB9,PSMB10,PSME1,PSME2,RPS6KA3,S100A8,S100A9,SYK,PSMD6,OPTN,TKFC,LSM14A,S100A14,NFKBIZ,PARP9,LRSAM1
5_Member	GO Biological Processes	GO:0002757	immune response-activating signal transduction	-6.28848	-3.98	34/644	1514,1520,2625,2633,3123,3265,3659,3965,4582,4615,4690,4792,5058,5359,5595,5696,5698,5699,5720,5721,5747,5879,6197,6279,6280,6850,9861,10616,26007,26065,57402,64332,80149,147179	CTSL,CTSS,GATA3,GBP1,HLA-DRB1,HRAS,IRF1,LGALS9,MUC1,MYD88,NCK1,NFKBIA,PAK1,PLSCR1,MAPK3,PSMB8,PSMB9,PSMB10,PSME1,PSME2,PTK2,RAC1,RPS6KA3,S100A8,S100A9,SYK,PSMD6,RBCK1,TKFC,LSM14A,S100A14,NFKBIZ,ZC3H12A,WIPF2
5_Member	GO Biological Processes	GO:0002218	activation of innate immune response	-6.03663	-3.78544	22/322	1514,1520,3265,3659,3965,4582,4615,4792,5058,5696,5698,5699,5720,5721,6197,6279,6280,6850,9861,26007,26065,57402	CTSL,CTSS,HRAS,IRF1,LGALS9,MUC1,MYD88,NFKBIA,PAK1,PSMB8,PSMB9,PSMB10,PSME1,PSME2,RPS6KA3,S100A8,S100A9,SYK,PSMD6,TKFC,LSM14A,S100A14
5_Member	GO Biological Processes	GO:0002221	pattern recognition receptor signaling pathway	-3.05567	-1.4162	12/200	1514,1520,3659,3965,4615,4792,6197,6279,6280,26007,26065,57402	CTSL,CTSS,IRF1,LGALS9,MYD88,NFKBIA,RPS6KA3,S100A8,S100A9,TKFC,LSM14A,S100A14
5_Member	GO Biological Processes	GO:0002224	toll-like receptor signaling pathway	-2.99989	-1.38251	10/149	1514,1520,3659,3965,4615,4792,6197,6279,6280,57402	CTSL,CTSS,IRF1,LGALS9,MYD88,NFKBIA,RPS6KA3,S100A8,S100A9,S100A14
6_Summary	GO Biological Processes	GO:0062012	regulation of small molecule metabolic process	-8.14823	-5.52744	31/459	160,207,215,972,1213,1312,1717,2203,2222,2852,3157,3638,3949,4047,5447,5696,5698,5699,5720,5721,6319,6713,6720,7262,8720,9453,9611,9861,9883,79602,93974,8942,9946,10327,10948,5747	AP2A1,AKT1,ABCD1,CD74,CLTC,COMT,DHCR7,FBP1,FDFT1,GPER1,HMGCS1,INSIG1,LDLR,LSS,POR,PSMB8,PSMB9,PSMB10,PSME1,PSME2,SCD,SQLE,SREBF1,PHLDA2,MBTPS1,GGPS1,NCOR1,PSMD6,POM121,ADIPOR2,ATP5IF1,KYNU,CRYZL1,AKR1A1,STARD3,PTK2
6_Member	GO Biological Processes	GO:0062012	regulation of small molecule metabolic process	-8.14823	-5.52744	31/459	160,207,215,972,1213,1312,1717,2203,2222,2852,3157,3638,3949,4047,5447,5696,5698,5699,5720,5721,6319,6713,6720,7262,8720,9453,9611,9861,9883,79602,93974	AP2A1,AKT1,ABCD1,CD74,CLTC,COMT,DHCR7,FBP1,FDFT1,GPER1,HMGCS1,INSIG1,LDLR,LSS,POR,PSMB8,PSMB9,PSMB10,PSME1,PSME2,SCD,SQLE,SREBF1,PHLDA2,MBTPS1,GGPS1,NCOR1,PSMD6,POM121,ADIPOR2,ATP5IF1
6_Member	GO Biological Processes	GO:0042180	cellular ketone metabolic process	-4.81999	-2.75295	17/248	207,215,972,1312,3638,5696,5698,5699,5720,5721,6720,8942,9861,9946,10327,10948,79602	AKT1,ABCD1,CD74,COMT,INSIG1,PSMB8,PSMB9,PSMB10,PSME1,PSME2,SREBF1,KYNU,PSMD6,CRYZL1,AKR1A1,STARD3,ADIPOR2
6_Member	GO Biological Processes	GO:0010565	regulation of cellular ketone metabolic process	-4.02741	-2.13433	13/181	207,215,972,1312,3638,5696,5698,5699,5720,5721,6720,9861,79602	AKT1,ABCD1,CD74,COMT,INSIG1,PSMB8,PSMB9,PSMB10,PSME1,PSME2,SREBF1,PSMD6,ADIPOR2
6_Member	GO Biological Processes	GO:0046889	positive regulation of lipid biosynthetic process	-2.12723	-0.766128	6/84	207,215,972,3949,5447,6720	AKT1,ABCD1,CD74,LDLR,POR,SREBF1
6_Member	GO Biological Processes	GO:0019217	regulation of fatty acid metabolic process	-1.85708	-0.573715	6/96	207,215,972,3638,6720,79602	AKT1,ABCD1,CD74,INSIG1,SREBF1,ADIPOR2
6_Member	GO Biological Processes	GO:0042304	regulation of fatty acid biosynthetic process	-1.58839	-0.380366	4/55	215,972,3638,79602	ABCD1,CD74,INSIG1,ADIPOR2
6_Member	GO Biological Processes	GO:0045834	positive regulation of lipid metabolic process	-1.5152	-0.330406	7/146	207,215,972,3949,5447,5747,6720	AKT1,ABCD1,CD74,LDLR,POR,PTK2,SREBF1
6_Member	GO Biological Processes	GO:0062013	positive regulation of small molecule metabolic process	-1.4214	-0.268484	7/153	207,215,972,1312,2852,5447,6720	AKT1,ABCD1,CD74,COMT,GPER1,POR,SREBF1
7_Summary	GO Biological Processes	GO:0002274	myeloid leukocyte activation	-8.07177	-5.47326	38/653	527,567,684,823,966,967,972,1191,1476,1509,1512,1520,2040,2495,2934,3312,3934,3949,3965,4257,4758,5359,5879,5908,6279,6280,6284,6386,6542,6850,8904,9861,9961,10159,10312,10538,80149,80331,3133,334,3959,6414,7076,10972,26154,57617,2625,4092,64332	ATP6V0C,B2M,BST2,CAPN1,CD59,CD63,CD74,CLU,CSTB,CTSD,CTSH,CTSS,STOM,FTH1,GSN,HSPA8,LCN2,LDLR,LGALS9,MGST1,NEU1,PLSCR1,RAC1,RAP1B,S100A8,S100A9,S100A13,SDCBP,SLC7A2,SYK,CPNE1,PSMD6,MVP,ATP6AP2,TCIRG1,BATF,ZC3H12A,DNAJC5,HLA-E,APLP2,LGALS3BP,SELENOP,TIMP1,TMED10,ABCA12,VPS18,GATA3,SMAD7,NFKBIZ
7_Member	GO Biological Processes	GO:0002274	myeloid leukocyte activation	-8.07177	-5.47326	38/653	527,567,684,823,966,967,972,1191,1476,1509,1512,1520,2040,2495,2934,3312,3934,3949,3965,4257,4758,5359,5879,5908,6279,6280,6284,6386,6542,6850,8904,9861,9961,10159,10312,10538,80149,80331	ATP6V0C,B2M,BST2,CAPN1,CD59,CD63,CD74,CLU,CSTB,CTSD,CTSH,CTSS,STOM,FTH1,GSN,HSPA8,LCN2,LDLR,LGALS9,MGST1,NEU1,PLSCR1,RAC1,RAP1B,S100A8,S100A9,S100A13,SDCBP,SLC7A2,SYK,CPNE1,PSMD6,MVP,ATP6AP2,TCIRG1,BATF,ZC3H12A,DNAJC5
7_Member	GO Biological Processes	GO:0002444	myeloid leukocyte mediated immunity	-6.8082	-4.3635	32/554	527,567,684,823,966,967,1476,1509,1512,1520,2040,2495,2934,3133,3312,3934,3965,4257,4758,5879,5908,6279,6280,6284,6386,6850,8904,9861,9961,10159,10312,80331	ATP6V0C,B2M,BST2,CAPN1,CD59,CD63,CSTB,CTSD,CTSH,CTSS,STOM,FTH1,GSN,HLA-E,HSPA8,LCN2,LGALS9,MGST1,NEU1,RAC1,RAP1B,S100A8,S100A9,S100A13,SDCBP,SYK,CPNE1,PSMD6,MVP,ATP6AP2,TCIRG1,DNAJC5
7_Member	GO Biological Processes	GO:0043299	leukocyte degranulation	-6.62501	-4.21683	31/536	527,567,684,823,966,967,1476,1509,1512,1520,2040,2495,2934,3312,3934,3965,4257,4758,5879,5908,6279,6280,6284,6386,6850,8904,9861,9961,10159,10312,80331	ATP6V0C,B2M,BST2,CAPN1,CD59,CD63,CSTB,CTSD,CTSH,CTSS,STOM,FTH1,GSN,HSPA8,LCN2,LGALS9,MGST1,NEU1,RAC1,RAP1B,S100A8,S100A9,S100A13,SDCBP,SYK,CPNE1,PSMD6,MVP,ATP6AP2,TCIRG1,DNAJC5
7_Member	GO Biological Processes	GO:0043312	neutrophil degranulation	-6.51291	-4.11851	29/486	527,567,684,823,966,967,1476,1509,1512,1520,2040,2495,2934,3312,3934,4257,4758,5879,5908,6279,6280,6386,6850,8904,9861,9961,10159,10312,80331	ATP6V0C,B2M,BST2,CAPN1,CD59,CD63,CSTB,CTSD,CTSH,CTSS,STOM,FTH1,GSN,HSPA8,LCN2,MGST1,NEU1,RAC1,RAP1B,S100A8,S100A9,SDCBP,SYK,CPNE1,PSMD6,MVP,ATP6AP2,TCIRG1,DNAJC5
7_Member	GO Biological Processes	GO:0002283	neutrophil activation involved in immune response	-6.45766	-4.08959	29/489	527,567,684,823,966,967,1476,1509,1512,1520,2040,2495,2934,3312,3934,4257,4758,5879,5908,6279,6280,6386,6850,8904,9861,9961,10159,10312,80331	ATP6V0C,B2M,BST2,CAPN1,CD59,CD63,CSTB,CTSD,CTSH,CTSS,STOM,FTH1,GSN,HSPA8,LCN2,MGST1,NEU1,RAC1,RAP1B,S100A8,S100A9,SDCBP,SYK,CPNE1,PSMD6,MVP,ATP6AP2,TCIRG1,DNAJC5
7_Member	GO Biological Processes	GO:0002275	myeloid cell activation involved in immune response	-6.4509	-4.08917	31/546	527,567,684,823,966,967,1476,1509,1512,1520,2040,2495,2934,3312,3934,3965,4257,4758,5879,5908,6279,6280,6284,6386,6850,8904,9861,9961,10159,10312,80331	ATP6V0C,B2M,BST2,CAPN1,CD59,CD63,CSTB,CTSD,CTSH,CTSS,STOM,FTH1,GSN,HSPA8,LCN2,LGALS9,MGST1,NEU1,RAC1,RAP1B,S100A8,S100A9,S100A13,SDCBP,SYK,CPNE1,PSMD6,MVP,ATP6AP2,TCIRG1,DNAJC5
7_Member	GO Biological Processes	GO:0045055	regulated exocytosis	-6.32094	-4.00686	39/795	334,527,567,684,823,966,967,1191,1476,1509,1512,1520,2040,2495,2934,3312,3934,3959,3965,4257,4758,5879,5908,6279,6280,6284,6386,6414,6850,7076,8904,9861,9961,10159,10312,10972,26154,57617,80331	APLP2,ATP6V0C,B2M,BST2,CAPN1,CD59,CD63,CLU,CSTB,CTSD,CTSH,CTSS,STOM,FTH1,GSN,HSPA8,LCN2,LGALS3BP,LGALS9,MGST1,NEU1,RAC1,RAP1B,S100A8,S100A9,S100A13,SDCBP,SELENOP,SYK,TIMP1,CPNE1,PSMD6,MVP,ATP6AP2,TCIRG1,TMED10,ABCA12,VPS18,DNAJC5
7_Member	GO Biological Processes	GO:0042119	neutrophil activation	-6.27709	-3.97414	29/499	527,567,684,823,966,967,1476,1509,1512,1520,2040,2495,2934,3312,3934,4257,4758,5879,5908,6279,6280,6386,6850,8904,9861,9961,10159,10312,80331	ATP6V0C,B2M,BST2,CAPN1,CD59,CD63,CSTB,CTSD,CTSH,CTSS,STOM,FTH1,GSN,HSPA8,LCN2,MGST1,NEU1,RAC1,RAP1B,S100A8,S100A9,SDCBP,SYK,CPNE1,PSMD6,MVP,ATP6AP2,TCIRG1,DNAJC5
7_Member	GO Biological Processes	GO:0002446	neutrophil mediated immunity	-6.25933	-3.96185	29/500	527,567,684,823,966,967,1476,1509,1512,1520,2040,2495,2934,3312,3934,4257,4758,5879,5908,6279,6280,6386,6850,8904,9861,9961,10159,10312,80331	ATP6V0C,B2M,BST2,CAPN1,CD59,CD63,CSTB,CTSD,CTSH,CTSS,STOM,FTH1,GSN,HSPA8,LCN2,MGST1,NEU1,RAC1,RAP1B,S100A8,S100A9,SDCBP,SYK,CPNE1,PSMD6,MVP,ATP6AP2,TCIRG1,DNAJC5
7_Member	GO Biological Processes	GO:0002366	leukocyte activation involved in immune response	-6.22332	-3.93655	36/709	527,567,684,823,966,967,1476,1509,1512,1520,2040,2495,2625,2934,3312,3934,3965,4092,4257,4758,5879,5908,6279,6280,6284,6386,6850,8904,9861,9961,10159,10312,10538,64332,80149,80331	ATP6V0C,B2M,BST2,CAPN1,CD59,CD63,CSTB,CTSD,CTSH,CTSS,STOM,FTH1,GATA3,GSN,HSPA8,LCN2,LGALS9,SMAD7,MGST1,NEU1,RAC1,RAP1B,S100A8,S100A9,S100A13,SDCBP,SYK,CPNE1,PSMD6,MVP,ATP6AP2,TCIRG1,BATF,NFKBIZ,ZC3H12A,DNAJC5
7_Member	GO Biological Processes	GO:0036230	granulocyte activation	-6.18883	-3.90733	29/504	527,567,684,823,966,967,1476,1509,1512,1520,2040,2495,2934,3312,3934,4257,4758,5879,5908,6279,6280,6386,6850,8904,9861,9961,10159,10312,80331	ATP6V0C,B2M,BST2,CAPN1,CD59,CD63,CSTB,CTSD,CTSH,CTSS,STOM,FTH1,GSN,HSPA8,LCN2,MGST1,NEU1,RAC1,RAP1B,S100A8,S100A9,SDCBP,SYK,CPNE1,PSMD6,MVP,ATP6AP2,TCIRG1,DNAJC5
7_Member	GO Biological Processes	GO:0002263	cell activation involved in immune response	-6.16588	-3.88958	36/713	527,567,684,823,966,967,1476,1509,1512,1520,2040,2495,2625,2934,3312,3934,3965,4092,4257,4758,5879,5908,6279,6280,6284,6386,6850,8904,9861,9961,10159,10312,10538,64332,80149,80331	ATP6V0C,B2M,BST2,CAPN1,CD59,CD63,CSTB,CTSD,CTSH,CTSS,STOM,FTH1,GATA3,GSN,HSPA8,LCN2,LGALS9,SMAD7,MGST1,NEU1,RAC1,RAP1B,S100A8,S100A9,S100A13,SDCBP,SYK,CPNE1,PSMD6,MVP,ATP6AP2,TCIRG1,BATF,NFKBIZ,ZC3H12A,DNAJC5
8_Summary	GO Biological Processes	GO:0001816	cytokine production	-7.70237	-5.13527	42/792	215,347,567,684,972,1191,1649,2625,2633,3133,3265,3659,3965,4088,4092,4615,4791,5094,5300,5595,5879,6279,6280,6284,6772,6850,7072,7706,8887,9111,9246,9475,10159,10312,10538,10725,23405,26007,26065,64343,80149,81844	ABCD1,APOD,B2M,BST2,CD74,CLU,DDIT3,GATA3,GBP1,HLA-E,HRAS,IRF1,LGALS9,SMAD3,SMAD7,MYD88,NFKB2,PCBP2,PIN1,MAPK3,RAC1,S100A8,S100A9,S100A13,STAT1,SYK,TIA1,TRIM25,TAX1BP1,NMI,UBE2L6,ROCK2,ATP6AP2,TCIRG1,BATF,NFAT5,DICER1,TKFC,LSM14A,AZI2,ZC3H12A,TRIM56
8_Member	GO Biological Processes	GO:0001816	cytokine production	-7.70237	-5.13527	42/792	215,347,567,684,972,1191,1649,2625,2633,3133,3265,3659,3965,4088,4092,4615,4791,5094,5300,5595,5879,6279,6280,6284,6772,6850,7072,7706,8887,9111,9246,9475,10159,10312,10538,10725,23405,26007,26065,64343,80149,81844	ABCD1,APOD,B2M,BST2,CD74,CLU,DDIT3,GATA3,GBP1,HLA-E,HRAS,IRF1,LGALS9,SMAD3,SMAD7,MYD88,NFKB2,PCBP2,PIN1,MAPK3,RAC1,S100A8,S100A9,S100A13,STAT1,SYK,TIA1,TRIM25,TAX1BP1,NMI,UBE2L6,ROCK2,ATP6AP2,TCIRG1,BATF,NFAT5,DICER1,TKFC,LSM14A,AZI2,ZC3H12A,TRIM56
8_Member	GO Biological Processes	GO:0032606	type I interferon production	-5.64133	-3.43742	13/128	3659,4615,4791,5094,5300,6772,6850,7706,8887,9111,9246,64343,81844	IRF1,MYD88,NFKB2,PCBP2,PIN1,STAT1,SYK,TRIM25,TAX1BP1,NMI,UBE2L6,AZI2,TRIM56
8_Member	GO Biological Processes	GO:0001817	regulation of cytokine production	-5.63799	-3.43742	35/720	215,347,567,684,972,1191,1649,2625,2633,3133,3265,3659,3965,4088,4092,4615,4791,5094,5300,5595,5879,6772,6850,7072,7706,8887,9111,9246,9475,10159,23405,26007,26065,80149,81844	ABCD1,APOD,B2M,BST2,CD74,CLU,DDIT3,GATA3,GBP1,HLA-E,HRAS,IRF1,LGALS9,SMAD3,SMAD7,MYD88,NFKB2,PCBP2,PIN1,MAPK3,RAC1,STAT1,SYK,TIA1,TRIM25,TAX1BP1,NMI,UBE2L6,ROCK2,ATP6AP2,DICER1,TKFC,LSM14A,ZC3H12A,TRIM56
8_Member	GO Biological Processes	GO:0032479	regulation of type I interferon production	-4.96452	-2.87789	12/126	3659,4615,4791,5094,5300,6772,6850,7706,8887,9111,9246,81844	IRF1,MYD88,NFKB2,PCBP2,PIN1,STAT1,SYK,TRIM25,TAX1BP1,NMI,UBE2L6,TRIM56
8_Member	GO Biological Processes	GO:0001818	negative regulation of cytokine production	-3.82655	-1.98958	17/298	215,347,684,2625,2633,3965,4092,5094,5300,5879,7072,7706,8887,9111,9246,23405,80149	ABCD1,APOD,BST2,GATA3,GBP1,LGALS9,SMAD7,PCBP2,PIN1,RAC1,TIA1,TRIM25,TAX1BP1,NMI,UBE2L6,DICER1,ZC3H12A
8_Member	GO Biological Processes	GO:0032480	negative regulation of type I interferon production	-3.4832	-1.73899	6/46	5094,5300,7706,8887,9111,9246	PCBP2,PIN1,TRIM25,TAX1BP1,NMI,UBE2L6
8_Member	GO Biological Processes	GO:0001819	positive regulation of cytokine production	-2.46505	-0.982365	19/464	567,972,1191,1649,2625,3133,3265,3659,3965,4088,4615,4791,5595,6772,6850,9475,10159,26007,26065	B2M,CD74,CLU,DDIT3,GATA3,HLA-E,HRAS,IRF1,LGALS9,SMAD3,MYD88,NFKB2,MAPK3,STAT1,SYK,ROCK2,ATP6AP2,TKFC,LSM14A
9_Summary	GO Biological Processes	GO:0006695	cholesterol biosynthetic process	-7.4289	-4.87177	12/75	1717,1718,2222,3157,3638,4047,5447,6319,6713,6720,8720,9453,3949,6820,10948,23780,128,222,2852,6817,10327,26007,26509,51109,55902,207,215,972,79602,246,1382,4257,5087,5359,5618,8760,8904,10390,10809,23556,29956,79143,165679,18,1312,2625,347,5747,9611,51599,85441,59342	DHCR7,DHCR24,FDFT1,HMGCS1,INSIG1,LSS,POR,SCD,SQLE,SREBF1,MBTPS1,GGPS1,LDLR,SULT2B1,STARD3,APOL2,ADH5,ALDH3B2,GPER1,SULT1A1,AKR1A1,TKFC,MYOF,RDH11,ACSS2,AKT1,ABCD1,CD74,ADIPOR2,ALOX15,CRABP2,MGST1,PBX1,PLSCR1,PRLR,CDS2,CPNE1,CEPT1,STARD10,PIGN,CERS2,MBOAT7,SPTSSB,ABAT,COMT,GATA3,APOD,PTK2,NCOR1,LSR,HELZ2,SCPEP1
9_Member	GO Biological Processes	GO:0006695	cholesterol biosynthetic process	-7.4289	-4.87177	12/75	1717,1718,2222,3157,3638,4047,5447,6319,6713,6720,8720,9453	DHCR7,DHCR24,FDFT1,HMGCS1,INSIG1,LSS,POR,SCD,SQLE,SREBF1,MBTPS1,GGPS1
9_Member	GO Biological Processes	GO:1902653	secondary alcohol biosynthetic process	-7.36228	-4.81492	12/76	1717,1718,2222,3157,3638,4047,5447,6319,6713,6720,8720,9453	DHCR7,DHCR24,FDFT1,HMGCS1,INSIG1,LSS,POR,SCD,SQLE,SREBF1,MBTPS1,GGPS1
9_Member	GO Biological Processes	GO:0090181	regulation of cholesterol metabolic process	-7.26619	-4.72837	11/63	1717,2222,3157,3949,4047,5447,6319,6713,6720,8720,9453	DHCR7,FDFT1,HMGCS1,LDLR,LSS,POR,SCD,SQLE,SREBF1,MBTPS1,GGPS1
9_Member	GO Biological Processes	GO:0045540	regulation of cholesterol biosynthetic process	-7.24708	-4.72775	10/50	1717,2222,3157,4047,5447,6319,6713,6720,8720,9453	DHCR7,FDFT1,HMGCS1,LSS,POR,SCD,SQLE,SREBF1,MBTPS1,GGPS1
9_Member	GO Biological Processes	GO:0106118	regulation of sterol biosynthetic process	-7.24708	-4.72775	10/50	1717,2222,3157,4047,5447,6319,6713,6720,8720,9453	DHCR7,FDFT1,HMGCS1,LSS,POR,SCD,SQLE,SREBF1,MBTPS1,GGPS1
9_Member	GO Biological Processes	GO:0008203	cholesterol metabolic process	-7.10055	-4.59894	16/150	1717,1718,2222,3157,3638,3949,4047,5447,6319,6713,6720,6820,8720,9453,10948,23780	DHCR7,DHCR24,FDFT1,HMGCS1,INSIG1,LDLR,LSS,POR,SCD,SQLE,SREBF1,SULT2B1,MBTPS1,GGPS1,STARD3,APOL2
9_Member	GO Biological Processes	GO:0016126	sterol biosynthetic process	-7.04447	-4.55146	12/81	1717,1718,2222,3157,3638,4047,5447,6319,6713,6720,8720,9453	DHCR7,DHCR24,FDFT1,HMGCS1,INSIG1,LSS,POR,SCD,SQLE,SREBF1,MBTPS1,GGPS1
9_Member	GO Biological Processes	GO:1902652	secondary alcohol metabolic process	-6.90123	-4.43304	16/155	1717,1718,2222,3157,3638,3949,4047,5447,6319,6713,6720,6820,8720,9453,10948,23780	DHCR7,DHCR24,FDFT1,HMGCS1,INSIG1,LDLR,LSS,POR,SCD,SQLE,SREBF1,SULT2B1,MBTPS1,GGPS1,STARD3,APOL2
9_Member	GO Biological Processes	GO:0006066	alcohol metabolic process	-6.82124	-4.36885	25/364	128,222,1717,1718,2222,2852,3157,3638,3949,4047,5447,6319,6713,6720,6817,6820,8720,9453,10327,10948,23780,26007,26509,51109,55902	ADH5,ALDH3B2,DHCR7,DHCR24,FDFT1,GPER1,HMGCS1,INSIG1,LDLR,LSS,POR,SCD,SQLE,SREBF1,SULT1A1,SULT2B1,MBTPS1,GGPS1,AKR1A1,STARD3,APOL2,TKFC,MYOF,RDH11,ACSS2
9_Member	GO Biological Processes	GO:0016125	sterol metabolic process	-6.49017	-4.10251	16/166	1717,1718,2222,3157,3638,3949,4047,5447,6319,6713,6720,6820,8720,9453,10948,23780	DHCR7,DHCR24,FDFT1,HMGCS1,INSIG1,LDLR,LSS,POR,SCD,SQLE,SREBF1,SULT2B1,MBTPS1,GGPS1,STARD3,APOL2
9_Member	GO Biological Processes	GO:0046890	regulation of lipid biosynthetic process	-6.14031	-3.86915	17/198	207,215,972,1717,2222,2852,3157,3638,3949,4047,5447,6319,6713,6720,8720,9453,79602	AKT1,ABCD1,CD74,DHCR7,FDFT1,GPER1,HMGCS1,INSIG1,LDLR,LSS,POR,SCD,SQLE,SREBF1,MBTPS1,GGPS1,ADIPOR2
9_Member	GO Biological Processes	GO:1902930	regulation of alcohol biosynthetic process	-6.11544	-3.84936	11/81	1717,2222,2852,3157,4047,5447,6319,6713,6720,8720,9453	DHCR7,FDFT1,GPER1,HMGCS1,LSS,POR,SCD,SQLE,SREBF1,MBTPS1,GGPS1
9_Member	GO Biological Processes	GO:0008610	lipid biosynthetic process	-5.80144	-3.57399	35/708	207,215,222,246,972,1382,1717,1718,2222,2852,3157,3638,3949,4047,4257,5087,5359,5447,5618,6319,6713,6720,8720,8760,8904,9453,10390,10809,10948,23556,29956,55902,79143,79602,165679	AKT1,ABCD1,ALDH3B2,ALOX15,CD74,CRABP2,DHCR7,DHCR24,FDFT1,GPER1,HMGCS1,INSIG1,LDLR,LSS,MGST1,PBX1,PLSCR1,POR,PRLR,SCD,SQLE,SREBF1,MBTPS1,CDS2,CPNE1,GGPS1,CEPT1,STARD10,STARD3,PIGN,CERS2,ACSS2,MBOAT7,ADIPOR2,SPTSSB
9_Member	GO Biological Processes	GO:1901615	organic hydroxy compound metabolic process	-5.66992	-3.45161	29/535	18,128,222,246,1312,1717,1718,2222,2625,2852,3157,3638,3949,4047,5447,6319,6713,6720,6817,6820,8720,9453,10327,10948,23780,26007,26509,51109,55902	ABAT,ADH5,ALDH3B2,ALOX15,COMT,DHCR7,DHCR24,FDFT1,GATA3,GPER1,HMGCS1,INSIG1,LDLR,LSS,POR,SCD,SQLE,SREBF1,SULT1A1,SULT2B1,MBTPS1,GGPS1,AKR1A1,STARD3,APOL2,TKFC,MYOF,RDH11,ACSS2
9_Member	GO Biological Processes	GO:0050810	regulation of steroid biosynthetic process	-5.41791	-3.23436	11/95	1717,2222,3157,3638,4047,5447,6319,6713,6720,8720,9453	DHCR7,FDFT1,HMGCS1,INSIG1,LSS,POR,SCD,SQLE,SREBF1,MBTPS1,GGPS1
9_Member	GO Biological Processes	GO:0019218	regulation of steroid metabolic process	-5.03586	-2.93909	12/124	1717,2222,3157,3638,3949,4047,5447,6319,6713,6720,8720,9453	DHCR7,FDFT1,HMGCS1,INSIG1,LDLR,LSS,POR,SCD,SQLE,SREBF1,MBTPS1,GGPS1
9_Member	GO Biological Processes	GO:0006694	steroid biosynthetic process	-4.882	-2.802	15/196	1717,1718,2222,3157,3638,4047,5087,5447,5618,6319,6713,6720,8720,9453,10948	DHCR7,DHCR24,FDFT1,HMGCS1,INSIG1,LSS,PBX1,POR,PRLR,SCD,SQLE,SREBF1,MBTPS1,GGPS1,STARD3
9_Member	GO Biological Processes	GO:0008202	steroid metabolic process	-4.75292	-2.69847	20/331	1312,1717,1718,2222,3157,3638,3949,4047,5087,5447,5618,6319,6713,6720,6817,6820,8720,9453,10948,23780	COMT,DHCR7,DHCR24,FDFT1,HMGCS1,INSIG1,LDLR,LSS,PBX1,POR,PRLR,SCD,SQLE,SREBF1,SULT1A1,SULT2B1,MBTPS1,GGPS1,STARD3,APOL2
9_Member	GO Biological Processes	GO:0019216	regulation of lipid metabolic process	-4.3764	-2.39854	22/410	207,215,347,972,1717,2222,2852,3157,3638,3949,4047,5447,5747,6319,6713,6720,8720,9453,9611,51599,79602,85441	AKT1,ABCD1,APOD,CD74,DHCR7,FDFT1,GPER1,HMGCS1,INSIG1,LDLR,LSS,POR,PTK2,SCD,SQLE,SREBF1,MBTPS1,GGPS1,NCOR1,LSR,ADIPOR2,HELZ2
9_Member	GO Biological Processes	GO:0046165	alcohol biosynthetic process	-4.17656	-2.25473	13/175	1717,1718,2222,2852,3157,3638,4047,5447,6319,6713,6720,8720,9453	DHCR7,DHCR24,FDFT1,GPER1,HMGCS1,INSIG1,LSS,POR,SCD,SQLE,SREBF1,MBTPS1,GGPS1
9_Member	GO Biological Processes	GO:0045338	farnesyl diphosphate metabolic process	-4.08639	-2.17584	3/5	2222,3157,9453	FDFT1,HMGCS1,GGPS1
9_Member	GO Biological Processes	GO:0016114	terpenoid biosynthetic process	-3.59056	-1.81486	4/16	1382,3157,4047,9453	CRABP2,HMGCS1,LSS,GGPS1
9_Member	GO Biological Processes	GO:1901617	organic hydroxy compound biosynthetic process	-3.30674	-1.6031	15/271	246,1717,1718,2222,2625,2852,3157,3638,4047,5447,6319,6713,6720,8720,9453	ALOX15,DHCR7,DHCR24,FDFT1,GATA3,GPER1,HMGCS1,INSIG1,LSS,POR,SCD,SQLE,SREBF1,MBTPS1,GGPS1
9_Member	GO Biological Processes	GO:0008299	isoprenoid biosynthetic process	-2.56602	-1.05297	4/29	1382,3157,4047,9453	CRABP2,HMGCS1,LSS,GGPS1
9_Member	GO Biological Processes	GO:0006721	terpenoid metabolic process	-2.48671	-0.999626	8/120	128,1382,2222,3157,4047,9453,51109,59342	ADH5,CRABP2,FDFT1,HMGCS1,LSS,GGPS1,RDH11,SCPEP1
9_Member	GO Biological Processes	GO:0006720	isoprenoid metabolic process	-2.10596	-0.74986	8/139	128,1382,2222,3157,4047,9453,51109,59342	ADH5,CRABP2,FDFT1,HMGCS1,LSS,GGPS1,RDH11,SCPEP1
10_Summary	GO Biological Processes	GO:0035456	response to interferon-beta	-7.20926	-4.69888	8/28	684,3659,5359,6772,8519,10410,10581,54739,972,2934,3965,7706,7726,2625,3437,4600,950,3434,3949,4088,7251,7919,51652,57617,80149	BST2,IRF1,PLSCR1,STAT1,IFITM1,IFITM3,IFITM2,XAF1,CD74,GSN,LGALS9,TRIM25,TRIM26,GATA3,IFIT3,MX2,SCARB2,IFIT1,LDLR,SMAD3,TSG101,DDX39B,CHMP3,VPS18,ZC3H12A
10_Member	GO Biological Processes	GO:0035456	response to interferon-beta	-7.20926	-4.69888	8/28	684,3659,5359,6772,8519,10410,10581,54739	BST2,IRF1,PLSCR1,STAT1,IFITM1,IFITM3,IFITM2,XAF1
10_Member	GO Biological Processes	GO:0046596	regulation of viral entry into host cell	-6.94996	-4.47366	8/30	972,2934,3965,7706,7726,8519,10410,10581	CD74,GSN,LGALS9,TRIM25,TRIM26,IFITM1,IFITM3,IFITM2
10_Member	GO Biological Processes	GO:0035455	response to interferon-alpha	-6.89167	-4.43145	7/21	684,2625,3437,4600,8519,10410,10581	BST2,GATA3,IFIT3,MX2,IFITM1,IFITM3,IFITM2
10_Member	GO Biological Processes	GO:0046597	negative regulation of viral entry into host cell	-5.81872	-3.58662	6/19	2934,7706,7726,8519,10410,10581	GSN,TRIM25,TRIM26,IFITM1,IFITM3,IFITM2
10_Member	GO Biological Processes	GO:0051701	interaction with host	-5.78525	-3.56239	17/210	950,972,2934,3434,3949,3965,4088,7251,7706,7726,7919,8519,10410,10581,51652,57617,80149	SCARB2,CD74,GSN,IFIT1,LDLR,LGALS9,SMAD3,TSG101,TRIM25,TRIM26,DDX39B,IFITM1,IFITM3,IFITM2,CHMP3,VPS18,ZC3H12A
10_Member	GO Biological Processes	GO:0046718	viral entry into host cell	-4.37756	-2.39854	11/122	950,972,2934,3949,3965,7706,7726,8519,10410,10581,57617	SCARB2,CD74,GSN,LDLR,LGALS9,TRIM25,TRIM26,IFITM1,IFITM3,IFITM2,VPS18
10_Member	GO Biological Processes	GO:0030260	entry into host cell	-3.97676	-2.10862	11/135	950,972,2934,3949,3965,7706,7726,8519,10410,10581,57617	SCARB2,CD74,GSN,LDLR,LGALS9,TRIM25,TRIM26,IFITM1,IFITM3,IFITM2,VPS18
10_Member	GO Biological Processes	GO:0044409	entry into host	-3.97676	-2.10862	11/135	950,972,2934,3949,3965,7706,7726,8519,10410,10581,57617	SCARB2,CD74,GSN,LDLR,LGALS9,TRIM25,TRIM26,IFITM1,IFITM3,IFITM2,VPS18
10_Member	GO Biological Processes	GO:0051806	entry into cell of other organism involved in symbiotic interaction	-3.97676	-2.10862	11/135	950,972,2934,3949,3965,7706,7726,8519,10410,10581,57617	SCARB2,CD74,GSN,LDLR,LGALS9,TRIM25,TRIM26,IFITM1,IFITM3,IFITM2,VPS18
10_Member	GO Biological Processes	GO:0051828	entry into other organism involved in symbiotic interaction	-3.97676	-2.10862	11/135	950,972,2934,3949,3965,7706,7726,8519,10410,10581,57617	SCARB2,CD74,GSN,LDLR,LGALS9,TRIM25,TRIM26,IFITM1,IFITM3,IFITM2,VPS18
11_Summary	GO Biological Processes	GO:0016049	cell growth	-7.01632	-4.53175	30/487	207,323,684,780,1382,1785,2203,2273,2664,3275,3300,3913,4088,5058,5300,5916,6197,6279,6280,6386,7251,7919,8766,8904,10425,10512,11054,65059,79602,118813,160,567,950,1072,2625,3265,3934,4343,4690,5530,5584,5747,5879,5962,8558,23373,29956,51256,54828,57175,64175,79874,116983,3776,5447,6414,7262,9643,10409,347,1717,2068,2934,9318,5087,6938,4685,5595,6277,23032,113246,537,2852,23405,246,6648,9475,593…	AKT1,APBB2,BST2,DDR1,CRABP2,DNM2,FBP1,FHL1,GDI1,PRMT2,DNAJB2,LAMB2,SMAD3,PAK1,PIN1,RARG,RPS6KA3,S100A8,S100A9,SDCBP,TSG101,DDX39B,RAB11A,CPNE1,ARIH2,SEMA3C,OGFR,RAPH1,ADIPOR2,ZFYVE27,AP2A1,B2M,SCARB2,CFL1,GATA3,HRAS,LCN2,MOV10,NCK1,PPP3CA,PRKCI,PTK2,RAC1,RDX,CDK10,CRTC1,CERS2,TBC1D7,BCAS3,CORO1B,P3H1,RABEP2,ACAP3,KCNK2,POR,SELENOP,PHLDA2,MORF4L2,BASP1,APOD,DHCR7,ERCC2,GSN,COPS2,PBX1,TCF12,NCAM2,M…
11_Member	GO Biological Processes	GO:0016049	cell growth	-7.01632	-4.53175	30/487	207,323,684,780,1382,1785,2203,2273,2664,3275,3300,3913,4088,5058,5300,5916,6197,6279,6280,6386,7251,7919,8766,8904,10425,10512,11054,65059,79602,118813	AKT1,APBB2,BST2,DDR1,CRABP2,DNM2,FBP1,FHL1,GDI1,PRMT2,DNAJB2,LAMB2,SMAD3,PAK1,PIN1,RARG,RPS6KA3,S100A8,S100A9,SDCBP,TSG101,DDX39B,RAB11A,CPNE1,ARIH2,SEMA3C,OGFR,RAPH1,ADIPOR2,ZFYVE27
11_Member	GO Biological Processes	GO:0001558	regulation of cell growth	-5.18934	-3.046	24/419	207,323,684,780,1382,1785,2203,2273,2664,3300,4088,5058,5300,6197,6279,6280,6386,7251,7919,8766,10512,11054,79602,118813	AKT1,APBB2,BST2,DDR1,CRABP2,DNM2,FBP1,FHL1,GDI1,DNAJB2,SMAD3,PAK1,PIN1,RPS6KA3,S100A8,S100A9,SDCBP,TSG101,DDX39B,RAB11A,SEMA3C,OGFR,ADIPOR2,ZFYVE27
11_Member	GO Biological Processes	GO:0031344	regulation of cell projection organization	-4.57358	-2.55661	32/708	160,207,567,950,1072,1382,1785,2625,2664,3265,3934,4343,4690,5058,5530,5584,5747,5879,5962,6280,8558,8766,10512,23373,29956,51256,54828,57175,64175,79874,116983,118813	AP2A1,AKT1,B2M,SCARB2,CFL1,CRABP2,DNM2,GATA3,GDI1,HRAS,LCN2,MOV10,NCK1,PAK1,PPP3CA,PRKCI,PTK2,RAC1,RDX,S100A9,CDK10,RAB11A,SEMA3C,CRTC1,CERS2,TBC1D7,BCAS3,CORO1B,P3H1,RABEP2,ACAP3,ZFYVE27
11_Member	GO Biological Processes	GO:0048588	developmental cell growth	-4.5582	-2.54795	16/234	780,1382,1785,2664,3275,3913,5058,5300,5916,7919,8766,8904,10425,10512,65059,118813	DDR1,CRABP2,DNM2,GDI1,PRMT2,LAMB2,PAK1,PIN1,RARG,DDX39B,RAB11A,CPNE1,ARIH2,SEMA3C,RAPH1,ZFYVE27
11_Member	GO Biological Processes	GO:0040008	regulation of growth	-4.49434	-2.49242	31/682	207,323,684,780,1382,1785,2203,2273,2664,3300,3776,4088,5058,5300,5447,5747,6197,6279,6280,6386,6414,7251,7262,7919,8766,9643,10409,10512,11054,79602,118813	AKT1,APBB2,BST2,DDR1,CRABP2,DNM2,FBP1,FHL1,GDI1,DNAJB2,KCNK2,SMAD3,PAK1,PIN1,POR,PTK2,RPS6KA3,S100A8,S100A9,SDCBP,SELENOP,TSG101,PHLDA2,DDX39B,RAB11A,MORF4L2,BASP1,SEMA3C,OGFR,ADIPOR2,ZFYVE27
11_Member	GO Biological Processes	GO:0120035	regulation of plasma membrane bounded cell projection organization	-4.30618	-2.34365	31/698	160,207,567,950,1072,1382,1785,2625,2664,3265,4343,4690,5058,5530,5584,5747,5879,5962,6280,8558,8766,10512,23373,29956,51256,54828,57175,64175,79874,116983,118813	AP2A1,AKT1,B2M,SCARB2,CFL1,CRABP2,DNM2,GATA3,GDI1,HRAS,MOV10,NCK1,PAK1,PPP3CA,PRKCI,PTK2,RAC1,RDX,S100A9,CDK10,RAB11A,SEMA3C,CRTC1,CERS2,TBC1D7,BCAS3,CORO1B,P3H1,RABEP2,ACAP3,ZFYVE27
11_Member	GO Biological Processes	GO:0048589	developmental growth	-4.20246	-2.26196	30/674	207,347,780,1382,1717,1785,2068,2625,2664,2934,3275,3776,3913,4088,5058,5300,5447,5530,5747,5916,7262,7919,8766,8904,9318,10409,10425,10512,65059,118813	AKT1,APOD,DDR1,CRABP2,DHCR7,DNM2,ERCC2,GATA3,GDI1,GSN,PRMT2,KCNK2,LAMB2,SMAD3,PAK1,PIN1,POR,PPP3CA,PTK2,RARG,PHLDA2,DDX39B,RAB11A,CPNE1,COPS2,BASP1,ARIH2,SEMA3C,RAPH1,ZFYVE27
11_Member	GO Biological Processes	GO:0030307	positive regulation of cell growth	-3.71534	-1.9127	12/169	207,1382,2664,5058,5300,6197,6279,6280,6386,7919,8766,118813	AKT1,CRABP2,GDI1,PAK1,PIN1,RPS6KA3,S100A8,S100A9,SDCBP,DDX39B,RAB11A,ZFYVE27
11_Member	GO Biological Processes	GO:0010975	regulation of neuron projection development	-3.56638	-1.79794	23/499	160,207,567,950,1072,1382,1785,2625,2664,4343,4690,5058,5530,5584,5747,6280,8766,10512,23373,29956,64175,116983,118813	AP2A1,AKT1,B2M,SCARB2,CFL1,CRABP2,DNM2,GATA3,GDI1,MOV10,NCK1,PAK1,PPP3CA,PRKCI,PTK2,S100A9,RAB11A,SEMA3C,CRTC1,CERS2,P3H1,ACAP3,ZFYVE27
11_Member	GO Biological Processes	GO:0031346	positive regulation of cell projection organization	-3.00894	-1.38929	18/383	160,950,1382,1785,2664,3265,3934,4690,5058,5584,5879,6280,8766,23373,54828,57175,64175,118813	AP2A1,SCARB2,CRABP2,DNM2,GDI1,HRAS,LCN2,NCK1,PAK1,PRKCI,RAC1,S100A9,RAB11A,CRTC1,BCAS3,CORO1B,P3H1,ZFYVE27
11_Member	GO Biological Processes	GO:0045664	regulation of neuron differentiation	-2.96618	-1.35778	26/656	160,207,567,950,1072,1382,1785,2625,2664,4343,4690,5058,5087,5530,5584,5747,6280,6938,8766,8904,10512,23373,29956,64175,116983,118813	AP2A1,AKT1,B2M,SCARB2,CFL1,CRABP2,DNM2,GATA3,GDI1,MOV10,NCK1,PAK1,PBX1,PPP3CA,PRKCI,PTK2,S100A9,TCF12,RAB11A,CPNE1,SEMA3C,CRTC1,CERS2,P3H1,ACAP3,ZFYVE27
11_Member	GO Biological Processes	GO:0008361	regulation of cell size	-2.91058	-1.31662	11/180	207,1382,1785,2664,5058,5879,5916,5962,8766,10512,118813	AKT1,CRABP2,DNM2,GDI1,PAK1,RAC1,RARG,RDX,RAB11A,SEMA3C,ZFYVE27
11_Member	GO Biological Processes	GO:0061564	axon development	-2.65549	-1.1205	21/514	323,347,780,1382,1785,2625,2664,3913,4685,5058,5595,5747,5879,6277,8766,10512,23032,29956,65059,113246,118813	APBB2,APOD,DDR1,CRABP2,DNM2,GATA3,GDI1,LAMB2,NCAM2,PAK1,MAPK3,PTK2,RAC1,S100A6,RAB11A,SEMA3C,USP33,CERS2,RAPH1,C12orf57,ZFYVE27
11_Member	GO Biological Processes	GO:0010720	positive regulation of cell development	-2.61406	-1.08651	22/553	160,537,950,1382,1785,2664,2852,4690,5058,5300,5584,5879,6280,6938,7919,8766,8904,10512,23373,23405,64175,118813	AP2A1,ATP6AP1,SCARB2,CRABP2,DNM2,GDI1,GPER1,NCK1,PAK1,PIN1,PRKCI,RAC1,S100A9,TCF12,DDX39B,RAB11A,CPNE1,SEMA3C,CRTC1,DICER1,P3H1,ZFYVE27
11_Member	GO Biological Processes	GO:1990138	neuron projection extension	-2.61117	-1.08454	10/168	780,1785,2664,3913,5058,8766,8904,10512,65059,118813	DDR1,DNM2,GDI1,LAMB2,PAK1,RAB11A,CPNE1,SEMA3C,RAPH1,ZFYVE27
11_Member	GO Biological Processes	GO:0060560	developmental growth involved in morphogenesis	-2.46891	-0.9835	12/235	780,1382,1785,2664,3913,5058,5916,8766,8904,10512,65059,118813	DDR1,CRABP2,DNM2,GDI1,LAMB2,PAK1,RARG,RAB11A,CPNE1,SEMA3C,RAPH1,ZFYVE27
11_Member	GO Biological Processes	GO:0048675	axon extension	-2.46462	-0.982365	8/121	1785,2664,3913,5058,8766,10512,65059,118813	DNM2,GDI1,LAMB2,PAK1,RAB11A,SEMA3C,RAPH1,ZFYVE27
11_Member	GO Biological Processes	GO:0045927	positive regulation of growth	-2.412	-0.954641	13/270	207,1382,2664,5058,5300,6197,6279,6280,6386,7919,8766,10409,118813	AKT1,CRABP2,GDI1,PAK1,PIN1,RPS6KA3,S100A8,S100A9,SDCBP,DDX39B,RAB11A,BASP1,ZFYVE27
11_Member	GO Biological Processes	GO:0090066	regulation of anatomical structure size	-2.3853	-0.934479	20/507	207,246,1072,1382,1785,2664,2852,2934,4690,5058,5879,5916,5962,6648,8766,9475,10512,57175,59342,118813	AKT1,ALOX15,CFL1,CRABP2,DNM2,GDI1,GPER1,GSN,NCK1,PAK1,RAC1,RARG,RDX,SOD2,RAB11A,ROCK2,SEMA3C,CORO1B,SCPEP1,ZFYVE27
11_Member	GO Biological Processes	GO:0032535	regulation of cellular component size	-2.38148	-0.933722	16/370	207,246,1072,1382,1785,2664,2934,4690,5058,5879,5916,5962,8766,10512,57175,118813	AKT1,ALOX15,CFL1,CRABP2,DNM2,GDI1,GSN,NCK1,PAK1,RAC1,RARG,RDX,RAB11A,SEMA3C,CORO1B,ZFYVE27
11_Member	GO Biological Processes	GO:0120039	plasma membrane bounded cell projection morphogenesis	-2.29192	-0.86586	24/662	323,780,1072,1382,1785,2625,2664,3913,4343,5058,5530,5595,5747,5879,6277,8766,8904,10512,23032,23405,57175,65059,113246,118813	APBB2,DDR1,CFL1,CRABP2,DNM2,GATA3,GDI1,LAMB2,MOV10,PAK1,PPP3CA,MAPK3,PTK2,RAC1,S100A6,RAB11A,CPNE1,SEMA3C,USP33,DICER1,CORO1B,RAPH1,C12orf57,ZFYVE27
11_Member	GO Biological Processes	GO:0022604	regulation of cell morphogenesis	-2.27079	-0.850825	19/484	389,1072,1382,1785,2035,2633,2664,4343,5058,5530,5747,5879,5962,6284,8766,10512,56882,57175,118813	RHOC,CFL1,CRABP2,DNM2,EPB41,GBP1,GDI1,MOV10,PAK1,PPP3CA,PTK2,RAC1,RDX,S100A13,RAB11A,SEMA3C,CDC42SE1,CORO1B,ZFYVE27
11_Member	GO Biological Processes	GO:0048858	cell projection morphogenesis	-2.26041	-0.850825	24/666	323,780,1072,1382,1785,2625,2664,3913,4343,5058,5530,5595,5747,5879,6277,8766,8904,10512,23032,23405,57175,65059,113246,118813	APBB2,DDR1,CFL1,CRABP2,DNM2,GATA3,GDI1,LAMB2,MOV10,PAK1,PPP3CA,MAPK3,PTK2,RAC1,S100A6,RAB11A,CPNE1,SEMA3C,USP33,DICER1,CORO1B,RAPH1,C12orf57,ZFYVE27
11_Member	GO Biological Processes	GO:0061387	regulation of extent of cell growth	-2.12984	-0.766128	7/110	1382,1785,2664,5058,8766,10512,118813	CRABP2,DNM2,GDI1,PAK1,RAB11A,SEMA3C,ZFYVE27
11_Member	GO Biological Processes	GO:0032990	cell part morphogenesis	-2.11589	-0.756048	24/685	323,780,1072,1382,1785,2625,2664,3913,4343,5058,5530,5595,5747,5879,6277,8766,8904,10512,23032,23405,57175,65059,113246,118813	APBB2,DDR1,CFL1,CRABP2,DNM2,GATA3,GDI1,LAMB2,MOV10,PAK1,PPP3CA,MAPK3,PTK2,RAC1,S100A6,RAB11A,CPNE1,SEMA3C,USP33,DICER1,CORO1B,RAPH1,C12orf57,ZFYVE27
11_Member	GO Biological Processes	GO:0048812	neuron projection morphogenesis	-2.11298	-0.754775	23/648	323,780,1072,1382,1785,2625,2664,3913,4343,5058,5530,5595,5747,5879,6277,8766,8904,10512,23032,23405,65059,113246,118813	APBB2,DDR1,CFL1,CRABP2,DNM2,GATA3,GDI1,LAMB2,MOV10,PAK1,PPP3CA,MAPK3,PTK2,RAC1,S100A6,RAB11A,CPNE1,SEMA3C,USP33,DICER1,RAPH1,C12orf57,ZFYVE27
11_Member	GO Biological Processes	GO:0045773	positive regulation of axon extension	-1.94746	-0.636746	4/43	2664,5058,8766,118813	GDI1,PAK1,RAB11A,ZFYVE27
11_Member	GO Biological Processes	GO:0010976	positive regulation of neuron projection development	-1.87671	-0.58676	12/281	160,950,1382,2664,4690,5058,5584,6280,8766,23373,64175,118813	AP2A1,SCARB2,CRABP2,GDI1,NCK1,PAK1,PRKCI,S100A9,RAB11A,CRTC1,P3H1,ZFYVE27
11_Member	GO Biological Processes	GO:0048639	positive regulation of developmental growth	-1.86666	-0.578303	9/184	207,1382,2664,5058,5300,7919,8766,10409,118813	AKT1,CRABP2,GDI1,PAK1,PIN1,DDX39B,RAB11A,BASP1,ZFYVE27
11_Member	GO Biological Processes	GO:0030516	regulation of axon extension	-1.85708	-0.573715	6/96	1785,2664,5058,8766,10512,118813	DNM2,GDI1,PAK1,RAB11A,SEMA3C,ZFYVE27
11_Member	GO Biological Processes	GO:0007409	axonogenesis	-1.7821	-0.518544	17/468	323,1382,1785,2625,2664,3913,5058,5595,5747,5879,6277,8766,10512,23032,65059,113246,118813	APBB2,CRABP2,DNM2,GATA3,GDI1,LAMB2,PAK1,MAPK3,PTK2,RAC1,S100A6,RAB11A,SEMA3C,USP33,RAPH1,C12orf57,ZFYVE27
11_Member	GO Biological Processes	GO:0045666	positive regulation of neuron differentiation	-1.67771	-0.441859	14/371	160,950,1382,2664,4690,5058,5584,6280,6938,8766,8904,23373,64175,118813	AP2A1,SCARB2,CRABP2,GDI1,NCK1,PAK1,PRKCI,S100A9,TCF12,RAB11A,CPNE1,CRTC1,P3H1,ZFYVE27
11_Member	GO Biological Processes	GO:0010769	regulation of cell morphogenesis involved in differentiation	-1.667	-0.4335	12/301	1072,1382,1785,2633,2664,5058,5530,5747,5879,8766,10512,118813	CFL1,CRABP2,DNM2,GBP1,GDI1,PAK1,PPP3CA,PTK2,RAC1,RAB11A,SEMA3C,ZFYVE27
11_Member	GO Biological Processes	GO:0050772	positive regulation of axonogenesis	-1.5218	-0.335318	5/85	1382,2664,5058,8766,118813	CRABP2,GDI1,PAK1,RAB11A,ZFYVE27
11_Member	GO Biological Processes	GO:0048667	cell morphogenesis involved in neuron differentiation	-1.49974	-0.321967	19/583	323,1072,1382,1785,2625,2664,3913,5058,5530,5595,5747,5879,6277,8766,10512,23032,65059,113246,118813	APBB2,CFL1,CRABP2,DNM2,GATA3,GDI1,LAMB2,PAK1,PPP3CA,MAPK3,PTK2,RAC1,S100A6,RAB11A,SEMA3C,USP33,RAPH1,C12orf57,ZFYVE27
11_Member	GO Biological Processes	GO:0050770	regulation of axonogenesis	-1.45957	-0.294816	8/183	1382,1785,2664,5058,5747,8766,10512,118813	CRABP2,DNM2,GDI1,PAK1,PTK2,RAB11A,SEMA3C,ZFYVE27
11_Member	GO Biological Processes	GO:0050769	positive regulation of neurogenesis	-1.45296	-0.289462	16/474	160,950,1382,2664,2852,4690,5058,5584,6280,6938,8766,8904,23373,23405,64175,118813	AP2A1,SCARB2,CRABP2,GDI1,GPER1,NCK1,PAK1,PRKCI,S100A9,TCF12,RAB11A,CPNE1,CRTC1,DICER1,P3H1,ZFYVE27
11_Member	GO Biological Processes	GO:0010770	positive regulation of cell morphogenesis involved in differentiation	-1.40854	-0.259196	7/154	1382,1785,2664,5058,5879,8766,118813	CRABP2,DNM2,GDI1,PAK1,RAC1,RAB11A,ZFYVE27
12_Summary	GO Biological Processes	GO:0052547	regulation of peptidase activity	-6.63611	-4.22084	28/452	207,334,684,1475,1476,1509,1512,1718,2537,2852,2934,3965,4088,5447,5595,5696,5698,5720,5721,6197,6279,6280,6478,6850,7076,9475,23204,27018,1191,1452,3300,4092,5747,10425,26263,80149,93974,972,1649,2907,4582,4690,6648,7009,9500,9774,10616,25994,84447,3265,3429,3934,30001,51246,323,1785,3275,4616,5300,5584,5916,7072,8878,10795,83464,3776	AKT1,APLP2,BST2,CSTA,CSTB,CTSD,CTSH,DHCR24,IFI6,GPER1,GSN,LGALS9,SMAD3,POR,MAPK3,PSMB8,PSMB9,PSME1,PSME2,RPS6KA3,S100A8,S100A9,SIAH2,SYK,TIMP1,ROCK2,ARL6IP1,BEX3,CLU,CSNK1A1,DNAJB2,SMAD7,PTK2,ARIH2,FBXO22,ZC3H12A,ATP5IF1,CD74,DDIT3,GRINA,MUC1,NCK1,SOD2,TMBIM6,MAGED1,BCLAF1,RBCK1,HIGD1A,SYVN1,HRAS,IFI27,LCN2,ERO1A,SHISA5,APBB2,DNM2,PRMT2,GADD45B,PIN1,PRKCI,RARG,TIA1,SQSTM1,ZNF268,APH1B,KCNK2
12_Member	GO Biological Processes	GO:0052547	regulation of peptidase activity	-6.63611	-4.22084	28/452	207,334,684,1475,1476,1509,1512,1718,2537,2852,2934,3965,4088,5447,5595,5696,5698,5720,5721,6197,6279,6280,6478,6850,7076,9475,23204,27018	AKT1,APLP2,BST2,CSTA,CSTB,CTSD,CTSH,DHCR24,IFI6,GPER1,GSN,LGALS9,SMAD3,POR,MAPK3,PSMB8,PSMB9,PSME1,PSME2,RPS6KA3,S100A8,S100A9,SIAH2,SYK,TIMP1,ROCK2,ARL6IP1,BEX3
12_Member	GO Biological Processes	GO:0052548	regulation of endopeptidase activity	-6.63608	-4.22084	27/425	207,334,684,1475,1476,1509,1512,1718,2537,2852,2934,3965,4088,5447,5696,5698,5720,5721,6197,6279,6280,6478,6850,7076,9475,23204,27018	AKT1,APLP2,BST2,CSTA,CSTB,CTSD,CTSH,DHCR24,IFI6,GPER1,GSN,LGALS9,SMAD3,POR,PSMB8,PSMB9,PSME1,PSME2,RPS6KA3,S100A8,S100A9,SIAH2,SYK,TIMP1,ROCK2,ARL6IP1,BEX3
12_Member	GO Biological Processes	GO:0045862	positive regulation of proteolysis	-6.25148	-3.95939	24/364	207,1191,1452,1509,1512,2852,2934,3300,3965,4088,4092,5595,5720,5721,5747,6279,6280,6850,9475,10425,26263,27018,80149,93974	AKT1,CLU,CSNK1A1,CTSD,CTSH,GPER1,GSN,DNAJB2,LGALS9,SMAD3,SMAD7,MAPK3,PSME1,PSME2,PTK2,S100A8,S100A9,SYK,ROCK2,ARIH2,FBXO22,BEX3,ZC3H12A,ATP5IF1
12_Member	GO Biological Processes	GO:0043281	regulation of cysteine-type endopeptidase activity involved in apoptotic process	-5.64518	-3.43742	17/215	207,1509,1512,1718,2537,2852,2934,3965,4088,5447,6197,6279,6280,6478,6850,23204,27018	AKT1,CTSD,CTSH,DHCR24,IFI6,GPER1,GSN,LGALS9,SMAD3,POR,RPS6KA3,S100A8,S100A9,SIAH2,SYK,ARL6IP1,BEX3
12_Member	GO Biological Processes	GO:2000116	regulation of cysteine-type endopeptidase activity	-5.63869	-3.43742	18/239	207,1509,1512,1718,2537,2852,2934,3965,4088,5447,5698,6197,6279,6280,6478,6850,23204,27018	AKT1,CTSD,CTSH,DHCR24,IFI6,GPER1,GSN,LGALS9,SMAD3,POR,PSMB9,RPS6KA3,S100A8,S100A9,SIAH2,SYK,ARL6IP1,BEX3
12_Member	GO Biological Processes	GO:2001233	regulation of apoptotic signaling pathway	-5.42114	-3.23436	24/406	207,972,1191,1512,1649,2537,2852,2907,2934,3965,4088,4582,4690,6279,6280,6478,6648,7009,9500,9774,10616,25994,84447,93974	AKT1,CD74,CLU,CTSH,DDIT3,IFI6,GPER1,GRINA,GSN,LGALS9,SMAD3,MUC1,NCK1,S100A8,S100A9,SIAH2,SOD2,TMBIM6,MAGED1,BCLAF1,RBCK1,HIGD1A,SYVN1,ATP5IF1
12_Member	GO Biological Processes	GO:0097190	apoptotic signaling pathway	-5.11938	-3.00516	30/602	207,972,1191,1512,1649,2537,2852,2907,2934,3265,3429,3934,3965,4088,4582,4690,6279,6280,6478,6648,7009,9500,9774,10616,25994,27018,30001,51246,84447,93974	AKT1,CD74,CLU,CTSH,DDIT3,IFI6,GPER1,GRINA,GSN,HRAS,IFI27,LCN2,LGALS9,SMAD3,MUC1,NCK1,S100A8,S100A9,SIAH2,SOD2,TMBIM6,MAGED1,BCLAF1,RBCK1,HIGD1A,BEX3,ERO1A,SHISA5,SYVN1,ATP5IF1
12_Member	GO Biological Processes	GO:0043065	positive regulation of apoptotic process	-4.61584	-2.58258	31/672	207,323,1191,1509,1512,1649,1785,2852,2934,3275,3965,4088,4616,4690,5300,5584,5916,6279,6280,6648,6850,7072,8878,9500,9774,10616,10795,27018,80149,83464,93974	AKT1,APBB2,CLU,CTSD,CTSH,DDIT3,DNM2,GPER1,GSN,PRMT2,LGALS9,SMAD3,GADD45B,NCK1,PIN1,PRKCI,RARG,S100A8,S100A9,SOD2,SYK,TIA1,SQSTM1,MAGED1,BCLAF1,RBCK1,ZNF268,BEX3,ZC3H12A,APH1B,ATP5IF1
12_Member	GO Biological Processes	GO:0043068	positive regulation of programmed cell death	-4.51839	-2.51094	31/680	207,323,1191,1509,1512,1649,1785,2852,2934,3275,3965,4088,4616,4690,5300,5584,5916,6279,6280,6648,6850,7072,8878,9500,9774,10616,10795,27018,80149,83464,93974	AKT1,APBB2,CLU,CTSD,CTSH,DDIT3,DNM2,GPER1,GSN,PRMT2,LGALS9,SMAD3,GADD45B,NCK1,PIN1,PRKCI,RARG,S100A8,S100A9,SOD2,SYK,TIA1,SQSTM1,MAGED1,BCLAF1,RBCK1,ZNF268,BEX3,ZC3H12A,APH1B,ATP5IF1
12_Member	GO Biological Processes	GO:0010942	positive regulation of cell death	-4.31909	-2.35151	32/730	207,323,1191,1509,1512,1649,1785,2852,2934,3275,3776,3965,4088,4616,4690,5300,5584,5916,6279,6280,6648,6850,7072,8878,9500,9774,10616,10795,27018,80149,83464,93974	AKT1,APBB2,CLU,CTSD,CTSH,DDIT3,DNM2,GPER1,GSN,PRMT2,KCNK2,LGALS9,SMAD3,GADD45B,NCK1,PIN1,PRKCI,RARG,S100A8,S100A9,SOD2,SYK,TIA1,SQSTM1,MAGED1,BCLAF1,RBCK1,ZNF268,BEX3,ZC3H12A,APH1B,ATP5IF1
12_Member	GO Biological Processes	GO:0010952	positive regulation of peptidase activity	-4.24238	-2.29223	14/197	1509,1512,2852,2934,3965,4088,5595,5720,5721,6279,6280,6850,9475,27018	CTSD,CTSH,GPER1,GSN,LGALS9,SMAD3,MAPK3,PSME1,PSME2,S100A8,S100A9,SYK,ROCK2,BEX3
12_Member	GO Biological Processes	GO:0010950	positive regulation of endopeptidase activity	-4.10113	-2.18385	13/178	1509,1512,2852,2934,3965,4088,5720,5721,6279,6280,6850,9475,27018	CTSD,CTSH,GPER1,GSN,LGALS9,SMAD3,PSME1,PSME2,S100A8,S100A9,SYK,ROCK2,BEX3
12_Member	GO Biological Processes	GO:2001235	positive regulation of apoptotic signaling pathway	-4.07637	-2.17182	13/179	1512,1649,2852,2934,3965,4088,4690,6279,6280,9500,9774,10616,93974	CTSH,DDIT3,GPER1,GSN,LGALS9,SMAD3,NCK1,S100A8,S100A9,MAGED1,BCLAF1,RBCK1,ATP5IF1
12_Member	GO Biological Processes	GO:0043280	positive regulation of cysteine-type endopeptidase activity involved in apoptotic process	-3.41084	-1.68179	10/132	1509,1512,2852,2934,3965,4088,6279,6280,6850,27018	CTSD,CTSH,GPER1,GSN,LGALS9,SMAD3,S100A8,S100A9,SYK,BEX3
12_Member	GO Biological Processes	GO:2001056	positive regulation of cysteine-type endopeptidase activity	-2.99989	-1.38251	10/149	1509,1512,2852,2934,3965,4088,6279,6280,6850,27018	CTSD,CTSH,GPER1,GSN,LGALS9,SMAD3,S100A8,S100A9,SYK,BEX3
13_Summary	GO Biological Processes	GO:0007169	transmembrane receptor protein tyrosine kinase signaling pathway	-6.47887	-4.09784	37/722	160,207,347,527,537,780,896,967,2537,2625,2852,3187,3265,4690,5058,5432,5438,5595,5618,5747,5879,6386,6720,6850,7072,7249,7251,9475,9961,10256,10312,26509,27131,51606,83464,84985,118813,1408,1512,1514,1520,3157,3275,5447,5584,5908,5916,5962,6772,9611,10267,23558,79602,153222,6773,7031,7076,51510,4792,1281,1785,65010,153129,3434	AP2A1,AKT1,APOD,ATP6V0C,ATP6AP1,DDR1,CCND3,CD63,IFI6,GATA3,GPER1,HNRNPH1,HRAS,NCK1,PAK1,POLR2C,POLR2I,MAPK3,PRLR,PTK2,RAC1,SDCBP,SREBF1,SYK,TIA1,TSC2,TSG101,ROCK2,MVP,CNKSR1,TCIRG1,MYOF,SNX5,ATP6V1H,APH1B,FAM83A,ZFYVE27,CRY2,CTSH,CTSL,CTSS,HMGCS1,PRMT2,POR,PRKCI,RAP1B,RARG,RDX,STAT1,NCOR1,RAMP1,WBP2,ADIPOR2,CREBRF,STAT2,TFF1,TIMP1,CHMP5,NFKBIA,COL3A1,DNM2,SLC26A6,SLC38A9,IFIT1
13_Member	GO Biological Processes	GO:0007169	transmembrane receptor protein tyrosine kinase signaling pathway	-6.47887	-4.09784	37/722	160,207,347,527,537,780,896,967,2537,2625,2852,3187,3265,4690,5058,5432,5438,5595,5618,5747,5879,6386,6720,6850,7072,7249,7251,9475,9961,10256,10312,26509,27131,51606,83464,84985,118813	AP2A1,AKT1,APOD,ATP6V0C,ATP6AP1,DDR1,CCND3,CD63,IFI6,GATA3,GPER1,HNRNPH1,HRAS,NCK1,PAK1,POLR2C,POLR2I,MAPK3,PRLR,PTK2,RAC1,SDCBP,SREBF1,SYK,TIA1,TSC2,TSG101,ROCK2,MVP,CNKSR1,TCIRG1,MYOF,SNX5,ATP6V1H,APH1B,FAM83A,ZFYVE27
13_Member	GO Biological Processes	GO:0032870	cellular response to hormone stimulus	-4.24891	-2.2963	31/703	207,527,537,896,1408,1512,1514,1520,2852,3157,3275,4690,5058,5447,5584,5618,5747,5908,5916,5962,6720,6772,7249,9475,9611,10267,10312,23558,51606,79602,153222	AKT1,ATP6V0C,ATP6AP1,CCND3,CRY2,CTSH,CTSL,CTSS,GPER1,HMGCS1,PRMT2,NCK1,PAK1,POR,PRKCI,PRLR,PTK2,RAP1B,RARG,RDX,SREBF1,STAT1,TSC2,ROCK2,NCOR1,RAMP1,TCIRG1,WBP2,ATP6V1H,ADIPOR2,CREBRF
13_Member	GO Biological Processes	GO:0071375	cellular response to peptide hormone stimulus	-3.88977	-2.04138	18/323	207,527,537,896,2852,4690,5058,5447,5584,5618,5747,5908,6720,6772,7249,9475,10312,51606	AKT1,ATP6V0C,ATP6AP1,CCND3,GPER1,NCK1,PAK1,POR,PRKCI,PRLR,PTK2,RAP1B,SREBF1,STAT1,TSC2,ROCK2,TCIRG1,ATP6V1H
13_Member	GO Biological Processes	GO:0043434	response to peptide hormone	-3.5307	-1.77163	21/438	207,527,537,896,2852,4690,5058,5447,5584,5618,5747,5908,6720,6772,6773,7031,7076,7249,9475,10312,51606	AKT1,ATP6V0C,ATP6AP1,CCND3,GPER1,NCK1,PAK1,POR,PRKCI,PRLR,PTK2,RAP1B,SREBF1,STAT1,STAT2,TFF1,TIMP1,TSC2,ROCK2,TCIRG1,ATP6V1H
13_Member	GO Biological Processes	GO:1901653	cellular response to peptide	-3.34665	-1.63462	19/389	207,527,537,896,2852,4690,5058,5447,5584,5618,5747,5908,6720,6772,7249,9475,10312,51510,51606	AKT1,ATP6V0C,ATP6AP1,CCND3,GPER1,NCK1,PAK1,POR,PRKCI,PRLR,PTK2,RAP1B,SREBF1,STAT1,TSC2,ROCK2,TCIRG1,CHMP5,ATP6V1H
13_Member	GO Biological Processes	GO:1901652	response to peptide	-3.27062	-1.57924	23/524	207,527,537,896,2852,4690,4792,5058,5447,5584,5618,5747,5908,6720,6772,6773,7031,7076,7249,9475,10312,51510,51606	AKT1,ATP6V0C,ATP6AP1,CCND3,GPER1,NCK1,NFKBIA,PAK1,POR,PRKCI,PRLR,PTK2,RAP1B,SREBF1,STAT1,STAT2,TFF1,TIMP1,TSC2,ROCK2,TCIRG1,CHMP5,ATP6V1H
13_Member	GO Biological Processes	GO:0008286	insulin receptor signaling pathway	-3.1373	-1.4783	10/143	207,527,537,896,4690,5058,6720,7249,10312,51606	AKT1,ATP6V0C,ATP6AP1,CCND3,NCK1,PAK1,SREBF1,TSC2,TCIRG1,ATP6V1H
13_Member	GO Biological Processes	GO:0071417	cellular response to organonitrogen compound	-2.94035	-1.34075	24/589	207,527,537,896,1281,1785,2852,4690,5058,5447,5584,5595,5618,5747,5908,6720,6772,7249,9475,10312,51510,51606,65010,153129	AKT1,ATP6V0C,ATP6AP1,CCND3,COL3A1,DNM2,GPER1,NCK1,PAK1,POR,PRKCI,MAPK3,PRLR,PTK2,RAP1B,SREBF1,STAT1,TSC2,ROCK2,TCIRG1,CHMP5,ATP6V1H,SLC26A6,SLC38A9
13_Member	GO Biological Processes	GO:0032869	cellular response to insulin stimulus	-2.73631	-1.18991	12/218	207,527,537,896,4690,5058,5584,6720,6772,7249,10312,51606	AKT1,ATP6V0C,ATP6AP1,CCND3,NCK1,PAK1,PRKCI,SREBF1,STAT1,TSC2,TCIRG1,ATP6V1H
13_Member	GO Biological Processes	GO:1901699	cellular response to nitrogen compound	-2.67963	-1.14275	25/652	207,527,537,896,1281,1785,2852,3434,4690,5058,5447,5584,5595,5618,5747,5908,6720,6772,7249,9475,10312,51510,51606,65010,153129	AKT1,ATP6V0C,ATP6AP1,CCND3,COL3A1,DNM2,GPER1,IFIT1,NCK1,PAK1,POR,PRKCI,MAPK3,PRLR,PTK2,RAP1B,SREBF1,STAT1,TSC2,ROCK2,TCIRG1,CHMP5,ATP6V1H,SLC26A6,SLC38A9
13_Member	GO Biological Processes	GO:0032868	response to insulin	-1.95627	-0.642181	12/274	207,527,537,896,4690,5058,5584,6720,6772,7249,10312,51606	AKT1,ATP6V0C,ATP6AP1,CCND3,NCK1,PAK1,PRKCI,SREBF1,STAT1,TSC2,TCIRG1,ATP6V1H
13_Member	GO Biological Processes	GO:0046626	regulation of insulin receptor signaling pathway	-1.31831	-0.19872	4/67	896,4690,5058,7249	CCND3,NCK1,PAK1,TSC2
14_Summary	GO Biological Processes	GO:0043620	regulation of DNA-templated transcription in response to stress	-6.4661	-4.0916	14/127	1649,4582,4690,5696,5698,5699,5720,5721,6197,6923,7009,9774,9861,25994,1106,2068,2625,6938,10538,2633,2635,3934,3965,4615,4792,5584,5595,5976,8878,80149,207,2852,6772,6850,8887,8904,10616,1153,3312,4343,9475,167153,334,3913,4008,4240,7076,8720,8766,9318,26263,51246,64175,80344,81876,90135,140461,4791,10725,23405,896,1213,2273,3265,3275,4088,4194,5087,5108,5116,5300,5884,5962,6386,8558,10040,10795…	DDIT3,MUC1,NCK1,PSMB8,PSMB9,PSMB10,PSME1,PSME2,RPS6KA3,ELOB,TMBIM6,BCLAF1,PSMD6,HIGD1A,CHD2,ERCC2,GATA3,TCF12,BATF,GBP1,GBP3,LCN2,LGALS9,MYD88,NFKBIA,PRKCI,MAPK3,UPF1,SQSTM1,ZC3H12A,AKT1,GPER1,STAT1,SYK,TAX1BP1,CPNE1,RBCK1,CIRBP,HSPA8,MOV10,ROCK2,TENT2,APLP2,LAMB2,LMO7,MFGE8,TIMP1,MBTPS1,RAB11A,COPS2,FBXO22,SHISA5,P3H1,DCAF11,RAB1B,BTBD6,ASB8,NFKB2,NFAT5,DICER1,CCND3,CLTC,FHL1,HRAS,PRMT2,SMAD3,MD…
14_Member	GO Biological Processes	GO:0043620	regulation of DNA-templated transcription in response to stress	-6.4661	-4.0916	14/127	1649,4582,4690,5696,5698,5699,5720,5721,6197,6923,7009,9774,9861,25994	DDIT3,MUC1,NCK1,PSMB8,PSMB9,PSMB10,PSME1,PSME2,RPS6KA3,ELOB,TMBIM6,BCLAF1,PSMD6,HIGD1A
14_Member	GO Biological Processes	GO:0060218	hematopoietic stem cell differentiation	-6.00706	-3.76073	11/83	1106,2068,2625,5696,5698,5699,5720,5721,6938,9861,10538	CHD2,ERCC2,GATA3,PSMB8,PSMB9,PSMB10,PSME1,PSME2,TCF12,PSMD6,BATF
14_Member	GO Biological Processes	GO:0070555	response to interleukin-1	-5.87144	-3.63465	17/207	2633,2635,3934,3965,4615,4792,5584,5595,5696,5698,5699,5720,5721,5976,8878,9861,80149	GBP1,GBP3,LCN2,LGALS9,MYD88,NFKBIA,PRKCI,MAPK3,PSMB8,PSMB9,PSMB10,PSME1,PSME2,UPF1,SQSTM1,PSMD6,ZC3H12A
14_Member	GO Biological Processes	GO:0071356	cellular response to tumor necrosis factor	-5.58177	-3.38552	20/291	207,2625,2633,2635,2852,3934,4792,5595,5696,5698,5699,5720,5721,6772,6850,8887,8904,9861,10616,80149	AKT1,GATA3,GBP1,GBP3,GPER1,LCN2,NFKBIA,MAPK3,PSMB8,PSMB9,PSMB10,PSME1,PSME2,STAT1,SYK,TAX1BP1,CPNE1,PSMD6,RBCK1,ZC3H12A
14_Member	GO Biological Processes	GO:0071347	cellular response to interleukin-1	-5.35924	-3.18397	15/179	2633,2635,3934,4615,4792,5595,5696,5698,5699,5720,5721,5976,8878,9861,80149	GBP1,GBP3,LCN2,MYD88,NFKBIA,MAPK3,PSMB8,PSMB9,PSMB10,PSME1,PSME2,UPF1,SQSTM1,PSMD6,ZC3H12A
14_Member	GO Biological Processes	GO:0043487	regulation of RNA stability	-5.24166	-3.0903	15/183	207,1153,3312,4343,4615,5696,5698,5699,5720,5721,5976,9475,9861,80149,167153	AKT1,CIRBP,HSPA8,MOV10,MYD88,PSMB8,PSMB9,PSMB10,PSME1,PSME2,UPF1,ROCK2,PSMD6,ZC3H12A,TENT2
14_Member	GO Biological Processes	GO:0043687	post-translational protein modification	-5.20842	-3.06092	22/362	334,3913,4008,4240,5696,5698,5699,5720,5721,6923,7076,8720,8766,9318,9861,26263,51246,64175,80344,81876,90135,140461	APLP2,LAMB2,LMO7,MFGE8,PSMB8,PSMB9,PSMB10,PSME1,PSME2,ELOB,TIMP1,MBTPS1,RAB11A,COPS2,PSMD6,FBXO22,SHISA5,P3H1,DCAF11,RAB1B,BTBD6,ASB8
14_Member	GO Biological Processes	GO:0038061	NIK/NF-kappaB signaling	-5.15569	-3.03066	15/186	207,3965,4791,4792,5696,5698,5699,5720,5721,8904,9861,10616,10725,23405,80149	AKT1,LGALS9,NFKB2,NFKBIA,PSMB8,PSMB9,PSMB10,PSME1,PSME2,CPNE1,PSMD6,RBCK1,NFAT5,DICER1,ZC3H12A
14_Member	GO Biological Processes	GO:0043618	regulation of transcription from RNA polymerase II promoter in response to stress	-5.14567	-3.02428	12/121	1649,4582,4690,5696,5698,5699,5720,5721,6923,7009,9861,25994	DDIT3,MUC1,NCK1,PSMB8,PSMB9,PSMB10,PSME1,PSME2,ELOB,TMBIM6,PSMD6,HIGD1A
14_Member	GO Biological Processes	GO:0034612	response to tumor necrosis factor	-5.1276	-3.00981	20/312	207,2625,2633,2635,2852,3934,4792,5595,5696,5698,5699,5720,5721,6772,6850,8887,8904,9861,10616,80149	AKT1,GATA3,GBP1,GBP3,GPER1,LCN2,NFKBIA,MAPK3,PSMB8,PSMB9,PSMB10,PSME1,PSME2,STAT1,SYK,TAX1BP1,CPNE1,PSMD6,RBCK1,ZC3H12A
14_Member	GO Biological Processes	GO:0043488	regulation of mRNA stability	-4.75658	-2.69847	14/177	207,1153,3312,4343,4615,5696,5698,5699,5720,5721,5976,9475,9861,80149	AKT1,CIRBP,HSPA8,MOV10,MYD88,PSMB8,PSMB9,PSMB10,PSME1,PSME2,UPF1,ROCK2,PSMD6,ZC3H12A
14_Member	GO Biological Processes	GO:0007346	regulation of mitotic cell cycle	-4.7531	-2.69847	31/661	207,896,1213,2068,2273,3265,3275,4088,4194,4582,5087,5108,5116,5300,5696,5698,5699,5720,5721,5884,5962,6386,8558,8766,9861,10040,10795,51510,51652,93323,415116	AKT1,CCND3,CLTC,ERCC2,FHL1,HRAS,PRMT2,SMAD3,MDM4,MUC1,PBX1,PCM1,PCNT,PIN1,PSMB8,PSMB9,PSMB10,PSME1,PSME2,RAD17,RDX,SDCBP,CDK10,RAB11A,PSMD6,TOM1L1,ZNF268,CHMP5,CHMP3,HAUS8,PIM3
14_Member	GO Biological Processes	GO:0050852	T cell receptor signaling pathway	-4.72666	-2.67837	15/202	2625,2633,3123,3265,4690,5058,5696,5698,5699,5720,5721,9861,10616,64332,80149	GATA3,GBP1,HLA-DRB1,HRAS,NCK1,PAK1,PSMB8,PSMB9,PSMB10,PSME1,PSME2,PSMD6,RBCK1,NFKBIZ,ZC3H12A
14_Member	GO Biological Processes	GO:0044270	cellular nitrogen compound catabolic process	-4.5974	-2.57509	32/706	207,215,1153,2203,3312,3669,4343,4615,4939,5447,5696,5698,5699,5720,5721,5976,6173,8942,9475,9611,9861,9883,9887,23405,23475,25939,30833,79077,80149,84309,85441,167153	AKT1,ABCD1,CIRBP,FBP1,HSPA8,ISG20,MOV10,MYD88,OAS2,POR,PSMB8,PSMB9,PSMB10,PSME1,PSME2,UPF1,RPL36A,KYNU,ROCK2,NCOR1,PSMD6,POM121,SMG7,DICER1,QPRT,SAMHD1,NT5C,DCTPP1,ZC3H12A,NUDT16L1,HELZ2,TENT2
14_Member	GO Biological Processes	GO:0070498	interleukin-1-mediated signaling pathway	-4.41556	-2.42717	10/100	4615,4792,5595,5696,5698,5699,5720,5721,8878,9861	MYD88,NFKBIA,MAPK3,PSMB8,PSMB9,PSMB10,PSME1,PSME2,SQSTM1,PSMD6
14_Member	GO Biological Processes	GO:0070646	protein modification by small protein removal	-4.29743	-2.33741	18/300	2625,4088,4092,4194,4792,5696,5698,5699,5720,5721,6478,8237,9318,9861,11274,23032,80149,84669	GATA3,SMAD3,SMAD7,MDM4,NFKBIA,PSMB8,PSMB9,PSMB10,PSME1,PSME2,SIAH2,USP11,COPS2,PSMD6,USP18,USP33,ZC3H12A,USP32
14_Member	GO Biological Processes	GO:0046700	heterocycle catabolic process	-4.2262	-2.27996	31/705	207,215,1153,2203,3312,3669,4343,4615,4939,5696,5698,5699,5720,5721,5976,6173,8942,9475,9611,9861,9883,9887,23405,23475,25939,30833,79077,80149,84309,85441,167153	AKT1,ABCD1,CIRBP,FBP1,HSPA8,ISG20,MOV10,MYD88,OAS2,PSMB8,PSMB9,PSMB10,PSME1,PSME2,UPF1,RPL36A,KYNU,ROCK2,NCOR1,PSMD6,POM121,SMG7,DICER1,QPRT,SAMHD1,NT5C,DCTPP1,ZC3H12A,NUDT16L1,HELZ2,TENT2
14_Member	GO Biological Processes	GO:0061013	regulation of mRNA catabolic process	-4.19489	-2.26149	14/199	207,1153,3312,4343,4615,5696,5698,5699,5720,5721,5976,9475,9861,80149	AKT1,CIRBP,HSPA8,MOV10,MYD88,PSMB8,PSMB9,PSMB10,PSME1,PSME2,UPF1,ROCK2,PSMD6,ZC3H12A
14_Member	GO Biological Processes	GO:0019439	aromatic compound catabolic process	-4.0923	-2.17768	31/717	207,215,1153,1312,2203,3312,3669,4343,4615,4939,5696,5698,5699,5720,5721,5976,6173,8942,9475,9611,9861,9883,9887,23405,25939,30833,79077,80149,84309,85441,167153	AKT1,ABCD1,CIRBP,COMT,FBP1,HSPA8,ISG20,MOV10,MYD88,OAS2,PSMB8,PSMB9,PSMB10,PSME1,PSME2,UPF1,RPL36A,KYNU,ROCK2,NCOR1,PSMD6,POM121,SMG7,DICER1,SAMHD1,NT5C,DCTPP1,ZC3H12A,NUDT16L1,HELZ2,TENT2
14_Member	GO Biological Processes	GO:0016579	protein deubiquitination	-4.07892	-2.17182	17/284	2625,4088,4092,4194,4792,5696,5698,5699,5720,5721,6478,8237,9861,11274,23032,80149,84669	GATA3,SMAD3,SMAD7,MDM4,NFKBIA,PSMB8,PSMB9,PSMB10,PSME1,PSME2,SIAH2,USP11,PSMD6,USP18,USP33,ZC3H12A,USP32
14_Member	GO Biological Processes	GO:0034655	nucleobase-containing compound catabolic process	-4.07573	-2.17182	29/652	207,215,1153,2203,3312,3669,4343,4615,4939,5696,5698,5699,5720,5721,5976,6173,9475,9611,9861,9883,9887,23405,25939,30833,79077,80149,84309,85441,167153	AKT1,ABCD1,CIRBP,FBP1,HSPA8,ISG20,MOV10,MYD88,OAS2,PSMB8,PSMB9,PSMB10,PSME1,PSME2,UPF1,RPL36A,ROCK2,NCOR1,PSMD6,POM121,SMG7,DICER1,SAMHD1,NT5C,DCTPP1,ZC3H12A,NUDT16L1,HELZ2,TENT2
14_Member	GO Biological Processes	GO:0006401	RNA catabolic process	-4.07009	-2.16836	21/400	207,1153,3312,3669,4343,4615,4939,5696,5698,5699,5720,5721,5976,6173,9475,9861,9887,80149,84309,85441,167153	AKT1,CIRBP,HSPA8,ISG20,MOV10,MYD88,OAS2,PSMB8,PSMB9,PSMB10,PSME1,PSME2,UPF1,RPL36A,ROCK2,PSMD6,SMG7,ZC3H12A,NUDT16L1,HELZ2,TENT2
14_Member	GO Biological Processes	GO:1905330	regulation of morphogenesis of an epithelium	-4.0518	-2.15442	13/180	160,1213,2625,5696,5698,5699,5720,5721,5879,6772,9500,9861,23122	AP2A1,CLTC,GATA3,PSMB8,PSMB9,PSMB10,PSME1,PSME2,RAC1,STAT1,MAGED1,PSMD6,CLASP2
14_Member	GO Biological Processes	GO:1901361	organic cyclic compound catabolic process	-4.04584	-2.15061	32/755	207,215,1153,1312,2203,3312,3669,4343,4615,4939,5696,5698,5699,5720,5721,5976,6173,8942,9475,9611,9861,9883,9887,23405,23475,25939,30833,79077,80149,84309,85441,167153	AKT1,ABCD1,CIRBP,COMT,FBP1,HSPA8,ISG20,MOV10,MYD88,OAS2,PSMB8,PSMB9,PSMB10,PSME1,PSME2,UPF1,RPL36A,KYNU,ROCK2,NCOR1,PSMD6,POM121,SMG7,DICER1,QPRT,SAMHD1,NT5C,DCTPP1,ZC3H12A,NUDT16L1,HELZ2,TENT2
14_Member	GO Biological Processes	GO:0071456	cellular response to hypoxia	-4.01133	-2.12039	14/207	207,3776,4194,5696,5698,5699,5720,5721,6923,7009,9475,9861,25994,30001	AKT1,KCNK2,MDM4,PSMB8,PSMB9,PSMB10,PSME1,PSME2,ELOB,TMBIM6,ROCK2,PSMD6,HIGD1A,ERO1A
14_Member	GO Biological Processes	GO:0071453	cellular response to oxygen levels	-3.99386	-2.11269	15/234	207,537,3776,4194,5696,5698,5699,5720,5721,6923,7009,9475,9861,25994,30001	AKT1,ATP6AP1,KCNK2,MDM4,PSMB8,PSMB9,PSMB10,PSME1,PSME2,ELOB,TMBIM6,ROCK2,PSMD6,HIGD1A,ERO1A
14_Member	GO Biological Processes	GO:1902036	regulation of hematopoietic stem cell differentiation	-3.96497	-2.10095	8/72	2625,5696,5698,5699,5720,5721,6938,9861	GATA3,PSMB8,PSMB9,PSMB10,PSME1,PSME2,TCF12,PSMD6
14_Member	GO Biological Processes	GO:0002223	stimulatory C-type lectin receptor signaling pathway	-3.96307	-2.10095	10/113	3265,4582,5058,5696,5698,5699,5720,5721,6850,9861	HRAS,MUC1,PAK1,PSMB8,PSMB9,PSMB10,PSME1,PSME2,SYK,PSMD6
14_Member	GO Biological Processes	GO:0002220	innate immune response activating cell surface receptor signaling pathway	-3.8681	-2.02546	10/116	3265,4582,5058,5696,5698,5699,5720,5721,6850,9861	HRAS,MUC1,PAK1,PSMB8,PSMB9,PSMB10,PSME1,PSME2,SYK,PSMD6
14_Member	GO Biological Processes	GO:0036294	cellular response to decreased oxygen levels	-3.79537	-1.97164	14/217	207,3776,4194,5696,5698,5699,5720,5721,6923,7009,9475,9861,25994,30001	AKT1,KCNK2,MDM4,PSMB8,PSMB9,PSMB10,PSME1,PSME2,ELOB,TMBIM6,ROCK2,PSMD6,HIGD1A,ERO1A
14_Member	GO Biological Processes	GO:0002244	hematopoietic progenitor cell differentiation	-3.78808	-1.96952	12/166	1106,2068,2625,5696,5698,5699,5720,5721,6938,9861,10538,167153	CHD2,ERCC2,GATA3,PSMB8,PSMB9,PSMB10,PSME1,PSME2,TCF12,PSMD6,BATF,TENT2
14_Member	GO Biological Processes	GO:0001666	response to hypoxia	-3.78257	-1.96581	19/359	18,207,2068,3776,4088,4194,5058,5300,5696,5698,5699,5720,5721,6923,7009,9475,9861,25994,30001	ABAT,AKT1,ERCC2,KCNK2,SMAD3,MDM4,PAK1,PIN1,PSMB8,PSMB9,PSMB10,PSME1,PSME2,ELOB,TMBIM6,ROCK2,PSMD6,HIGD1A,ERO1A
14_Member	GO Biological Processes	GO:0033209	tumor necrosis factor-mediated signaling pathway	-3.76364	-1.94867	12/167	4792,5696,5698,5699,5720,5721,6772,6850,8887,8904,9861,10616	NFKBIA,PSMB8,PSMB9,PSMB10,PSME1,PSME2,STAT1,SYK,TAX1BP1,CPNE1,PSMD6,RBCK1
14_Member	GO Biological Processes	GO:0061418	regulation of transcription from RNA polymerase II promoter in response to hypoxia	-3.7585	-1.94709	8/77	5696,5698,5699,5720,5721,6923,9861,25994	PSMB8,PSMB9,PSMB10,PSME1,PSME2,ELOB,PSMD6,HIGD1A
14_Member	GO Biological Processes	GO:0000086	G2/M transition of mitotic cell cycle	-3.73537	-1.92749	15/247	1785,2273,5087,5108,5116,5696,5698,5699,5720,5721,5884,8766,9861,10133,93323	DNM2,FHL1,PBX1,PCM1,PCNT,PSMB8,PSMB9,PSMB10,PSME1,PSME2,RAD17,RAB11A,PSMD6,OPTN,HAUS8
14_Member	GO Biological Processes	GO:0070482	response to oxygen levels	-3.70998	-1.90908	20/394	18,207,537,2068,3776,4088,4194,5058,5300,5696,5698,5699,5720,5721,6923,7009,9475,9861,25994,30001	ABAT,AKT1,ATP6AP1,ERCC2,KCNK2,SMAD3,MDM4,PAK1,PIN1,PSMB8,PSMB9,PSMB10,PSME1,PSME2,ELOB,TMBIM6,ROCK2,PSMD6,HIGD1A,ERO1A
14_Member	GO Biological Processes	GO:0010389	regulation of G2/M transition of mitotic cell cycle	-3.68256	-1.8851	13/196	2273,5087,5108,5116,5696,5698,5699,5720,5721,5884,8766,9861,93323	FHL1,PBX1,PCM1,PCNT,PSMB8,PSMB9,PSMB10,PSME1,PSME2,RAD17,RAB11A,PSMD6,HAUS8
14_Member	GO Biological Processes	GO:0044772	mitotic cell cycle phase transition	-3.67293	-1.87719	26/588	207,896,1785,2068,2273,3275,4194,4582,5087,5108,5116,5422,5530,5696,5698,5699,5720,5721,5884,5962,8558,8766,9861,10133,23122,93323	AKT1,CCND3,DNM2,ERCC2,FHL1,PRMT2,MDM4,MUC1,PBX1,PCM1,PCNT,POLA1,PPP3CA,PSMB8,PSMB9,PSMB10,PSME1,PSME2,RAD17,RDX,CDK10,RAB11A,PSMD6,OPTN,CLASP2,HAUS8
14_Member	GO Biological Processes	GO:0006402	mRNA catabolic process	-3.66083	-1.87019	19/367	207,1153,3312,4343,4615,5696,5698,5699,5720,5721,5976,6173,9475,9861,9887,80149,84309,85441,167153	AKT1,CIRBP,HSPA8,MOV10,MYD88,PSMB8,PSMB9,PSMB10,PSME1,PSME2,UPF1,RPL36A,ROCK2,PSMD6,SMG7,ZC3H12A,NUDT16L1,HELZ2,TENT2
14_Member	GO Biological Processes	GO:0036293	response to decreased oxygen levels	-3.61625	-1.83065	19/370	18,207,2068,3776,4088,4194,5058,5300,5696,5698,5699,5720,5721,6923,7009,9475,9861,25994,30001	ABAT,AKT1,ERCC2,KCNK2,SMAD3,MDM4,PAK1,PIN1,PSMB8,PSMB9,PSMB10,PSME1,PSME2,ELOB,TMBIM6,ROCK2,PSMD6,HIGD1A,ERO1A
14_Member	GO Biological Processes	GO:0033238	regulation of cellular amine metabolic process	-3.60502	-1.82193	8/81	18,1312,5696,5698,5699,5720,5721,9861	ABAT,COMT,PSMB8,PSMB9,PSMB10,PSME1,PSME2,PSMD6
14_Member	GO Biological Processes	GO:2000027	regulation of animal organ morphogenesis	-3.6042	-1.82193	15/254	160,1213,2625,5447,5696,5698,5699,5720,5721,5879,6772,9500,9861,10409,10512	AP2A1,CLTC,GATA3,POR,PSMB8,PSMB9,PSMB10,PSME1,PSME2,RAC1,STAT1,MAGED1,PSMD6,BASP1,SEMA3C
14_Member	GO Biological Processes	GO:0006521	regulation of cellular amino acid metabolic process	-3.57886	-1.8048	7/62	1312,5696,5698,5699,5720,5721,9861	COMT,PSMB8,PSMB9,PSMB10,PSME1,PSME2,PSMD6
14_Member	GO Biological Processes	GO:0035567	non-canonical Wnt signaling pathway	-3.57325	-1.80243	11/150	160,1213,4343,5530,5696,5698,5699,5720,5721,5879,9861	AP2A1,CLTC,MOV10,PPP3CA,PSMB8,PSMB9,PSMB10,PSME1,PSME2,RAC1,PSMD6
14_Member	GO Biological Processes	GO:0044770	cell cycle phase transition	-3.56555	-1.79794	27/631	207,896,1785,2068,2273,3275,4194,4582,5087,5108,5116,5422,5530,5696,5698,5699,5720,5721,5884,5962,5976,8558,8766,9861,10133,23122,93323	AKT1,CCND3,DNM2,ERCC2,FHL1,PRMT2,MDM4,MUC1,PBX1,PCM1,PCNT,POLA1,PPP3CA,PSMB8,PSMB9,PSMB10,PSME1,PSME2,RAD17,RDX,UPF1,CDK10,RAB11A,PSMD6,OPTN,CLASP2,HAUS8
14_Member	GO Biological Processes	GO:0002429	immune response-activating cell surface receptor signaling pathway	-3.48968	-1.74171	22/473	2625,2633,3123,3265,4582,4690,5058,5359,5595,5696,5698,5699,5720,5721,5747,5879,6850,9861,10616,64332,80149,147179	GATA3,GBP1,HLA-DRB1,HRAS,MUC1,NCK1,PAK1,PLSCR1,MAPK3,PSMB8,PSMB9,PSMB10,PSME1,PSME2,PTK2,RAC1,SYK,PSMD6,RBCK1,NFKBIZ,ZC3H12A,WIPF2
14_Member	GO Biological Processes	GO:0002768	immune response-regulating cell surface receptor signaling pathway	-3.48105	-1.73836	23/506	2625,2633,3123,3265,4582,4690,5058,5359,5530,5595,5696,5698,5699,5720,5721,5747,5879,6850,9861,10616,64332,80149,147179	GATA3,GBP1,HLA-DRB1,HRAS,MUC1,NCK1,PAK1,PLSCR1,PPP3CA,MAPK3,PSMB8,PSMB9,PSMB10,PSME1,PSME2,PTK2,RAC1,SYK,PSMD6,RBCK1,NFKBIZ,ZC3H12A,WIPF2
14_Member	GO Biological Processes	GO:0002009	morphogenesis of an epithelium	-3.46594	-1.72476	24/540	160,389,780,1072,1213,1512,2625,4088,5058,5087,5696,5698,5699,5720,5721,5879,5916,6772,7249,9500,9861,10512,23122,55764	AP2A1,RHOC,DDR1,CFL1,CLTC,CTSH,GATA3,SMAD3,PAK1,PBX1,PSMB8,PSMB9,PSMB10,PSME1,PSME2,RAC1,RARG,STAT1,TSC2,MAGED1,PSMD6,SEMA3C,CLASP2,IFT122
14_Member	GO Biological Processes	GO:1901532	regulation of hematopoietic progenitor cell differentiation	-3.46081	-1.72114	8/85	2625,5696,5698,5699,5720,5721,6938,9861	GATA3,PSMB8,PSMB9,PSMB10,PSME1,PSME2,TCF12,PSMD6
14_Member	GO Biological Processes	GO:1901990	regulation of mitotic cell cycle phase transition	-3.45241	-1.71573	21/444	207,896,2068,2273,3275,4194,4582,5087,5108,5116,5696,5698,5699,5720,5721,5884,5962,8558,8766,9861,93323	AKT1,CCND3,ERCC2,FHL1,PRMT2,MDM4,MUC1,PBX1,PCM1,PCNT,PSMB8,PSMB9,PSMB10,PSME1,PSME2,RAD17,RDX,CDK10,RAB11A,PSMD6,HAUS8
14_Member	GO Biological Processes	GO:0060071	Wnt signaling pathway, planar cell polarity pathway	-3.42662	-1.69587	9/108	160,1213,5696,5698,5699,5720,5721,5879,9861	AP2A1,CLTC,PSMB8,PSMB9,PSMB10,PSME1,PSME2,RAC1,PSMD6
14_Member	GO Biological Processes	GO:0044839	cell cycle G2/M phase transition	-3.39128	-1.66638	15/266	1785,2273,5087,5108,5116,5696,5698,5699,5720,5721,5884,8766,9861,10133,93323	DNM2,FHL1,PBX1,PCM1,PCNT,PSMB8,PSMB9,PSMB10,PSME1,PSME2,RAD17,RAB11A,PSMD6,OPTN,HAUS8
14_Member	GO Biological Processes	GO:0090175	regulation of establishment of planar polarity	-3.36766	-1.64709	9/110	160,1213,5696,5698,5699,5720,5721,5879,9861	AP2A1,CLTC,PSMB8,PSMB9,PSMB10,PSME1,PSME2,RAC1,PSMD6
14_Member	GO Biological Processes	GO:1902749	regulation of cell cycle G2/M phase transition	-3.33392	-1.62551	13/213	2273,5087,5108,5116,5696,5698,5699,5720,5721,5884,8766,9861,93323	FHL1,PBX1,PCM1,PCNT,PSMB8,PSMB9,PSMB10,PSME1,PSME2,RAD17,RAB11A,PSMD6,HAUS8
14_Member	GO Biological Processes	GO:0038093	Fc receptor signaling pathway	-3.33055	-1.62412	14/241	4690,5058,5530,5595,5696,5698,5699,5720,5721,5747,5879,6850,9861,147179	NCK1,PAK1,PPP3CA,MAPK3,PSMB8,PSMB9,PSMB10,PSME1,PSME2,PTK2,RAC1,SYK,PSMD6,WIPF2
14_Member	GO Biological Processes	GO:0016055	Wnt signaling pathway	-3.29338	-1.59271	23/522	160,527,1213,1452,1649,2625,4088,4343,5204,5300,5530,5696,5698,5699,5720,5721,5879,5916,6478,7249,9861,10159,54894	AP2A1,ATP6V0C,CLTC,CSNK1A1,DDIT3,GATA3,SMAD3,MOV10,PFDN5,PIN1,PPP3CA,PSMB8,PSMB9,PSMB10,PSME1,PSME2,RAC1,RARG,SIAH2,TSC2,PSMD6,ATP6AP2,RNF43
14_Member	GO Biological Processes	GO:0198738	cell-cell signaling by wnt	-3.27062	-1.57924	23/524	160,527,1213,1452,1649,2625,4088,4343,5204,5300,5530,5696,5698,5699,5720,5721,5879,5916,6478,7249,9861,10159,54894	AP2A1,ATP6V0C,CLTC,CSNK1A1,DDIT3,GATA3,SMAD3,MOV10,PFDN5,PIN1,PPP3CA,PSMB8,PSMB9,PSMB10,PSME1,PSME2,RAC1,RARG,SIAH2,TSC2,PSMD6,ATP6AP2,RNF43
14_Member	GO Biological Processes	GO:0009308	amine metabolic process	-3.23337	-1.54999	10/139	18,1312,5696,5698,5699,5720,5721,6817,8942,9861	ABAT,COMT,PSMB8,PSMB9,PSMB10,PSME1,PSME2,SULT1A1,KYNU,PSMD6
14_Member	GO Biological Processes	GO:0010972	negative regulation of G2/M transition of mitotic cell cycle	-3.19673	-1.5289	8/93	2273,5696,5698,5699,5720,5721,5884,9861	FHL1,PSMB8,PSMB9,PSMB10,PSME1,PSME2,RAD17,PSMD6
14_Member	GO Biological Processes	GO:2000736	regulation of stem cell differentiation	-3.14516	-1.48492	9/118	2625,5696,5698,5699,5720,5721,6938,9861,10512	GATA3,PSMB8,PSMB9,PSMB10,PSME1,PSME2,TCF12,PSMD6,SEMA3C
14_Member	GO Biological Processes	GO:0038095	Fc-epsilon receptor signaling pathway	-3.13441	-1.4779	11/169	5058,5530,5595,5696,5698,5699,5720,5721,5879,6850,9861	PAK1,PPP3CA,MAPK3,PSMB8,PSMB9,PSMB10,PSME1,PSME2,RAC1,SYK,PSMD6
14_Member	GO Biological Processes	GO:0048729	tissue morphogenesis	-3.12764	-1.47237	27/674	160,389,780,1072,1213,1281,1512,2625,4088,4092,4194,5058,5087,5696,5698,5699,5720,5721,5879,5916,6772,7249,9500,9861,10512,23122,55764	AP2A1,RHOC,DDR1,CFL1,CLTC,COL3A1,CTSH,GATA3,SMAD3,SMAD7,MDM4,PAK1,PBX1,PSMB8,PSMB9,PSMB10,PSME1,PSME2,RAC1,RARG,STAT1,TSC2,MAGED1,PSMD6,SEMA3C,CLASP2,IFT122
14_Member	GO Biological Processes	GO:0050851	antigen receptor-mediated signaling pathway	-3.07052	-1.42866	16/316	2625,2633,3123,3265,4690,5058,5696,5698,5699,5720,5721,6850,9861,10616,64332,80149	GATA3,GBP1,HLA-DRB1,HRAS,NCK1,PAK1,PSMB8,PSMB9,PSMB10,PSME1,PSME2,SYK,PSMD6,RBCK1,NFKBIZ,ZC3H12A
14_Member	GO Biological Processes	GO:0010564	regulation of cell cycle process	-3.04862	-1.4115	30/789	207,648,896,1213,2068,2273,2852,3275,4194,4582,5087,5108,5116,5300,5696,5698,5699,5720,5721,5884,5962,8558,8766,9475,9861,10040,10795,51510,51652,93323	AKT1,BMI1,CCND3,CLTC,ERCC2,FHL1,GPER1,PRMT2,MDM4,MUC1,PBX1,PCM1,PCNT,PIN1,PSMB8,PSMB9,PSMB10,PSME1,PSME2,RAD17,RDX,CDK10,RAB11A,ROCK2,PSMD6,TOM1L1,ZNF268,CHMP5,CHMP3,HAUS8
14_Member	GO Biological Processes	GO:0048863	stem cell differentiation	-3.0405	-1.4115	14/258	1072,1106,2068,2625,5595,5696,5698,5699,5720,5721,6938,9861,10512,10538	CFL1,CHD2,ERCC2,GATA3,MAPK3,PSMB8,PSMB9,PSMB10,PSME1,PSME2,TCF12,PSMD6,SEMA3C,BATF
14_Member	GO Biological Processes	GO:1901987	regulation of cell cycle phase transition	-3.01742	-1.39637	21/480	207,896,2068,2273,3275,4194,4582,5087,5108,5116,5696,5698,5699,5720,5721,5884,5962,8558,8766,9861,93323	AKT1,CCND3,ERCC2,FHL1,PRMT2,MDM4,MUC1,PBX1,PCM1,PCNT,PSMB8,PSMB9,PSMB10,PSME1,PSME2,RAD17,RDX,CDK10,RAB11A,PSMD6,HAUS8
14_Member	GO Biological Processes	GO:0001736	establishment of planar polarity	-2.99105	-1.37706	9/124	160,1213,5696,5698,5699,5720,5721,5879,9861	AP2A1,CLTC,PSMB8,PSMB9,PSMB10,PSME1,PSME2,RAC1,PSMD6
14_Member	GO Biological Processes	GO:0007164	establishment of tissue polarity	-2.99105	-1.37706	9/124	160,1213,5696,5698,5699,5720,5721,5879,9861	AP2A1,CLTC,PSMB8,PSMB9,PSMB10,PSME1,PSME2,RAC1,PSMD6
14_Member	GO Biological Processes	GO:1905114	cell surface receptor signaling pathway involved in cell-cell signaling	-2.92809	-1.33282	25/625	18,160,207,527,1213,1452,1649,2625,4088,4343,5204,5300,5530,5696,5698,5699,5720,5721,5879,5916,6478,7249,9861,10159,54894	ABAT,AP2A1,AKT1,ATP6V0C,CLTC,CSNK1A1,DDIT3,GATA3,SMAD3,MOV10,PFDN5,PIN1,PPP3CA,PSMB8,PSMB9,PSMB10,PSME1,PSME2,RAC1,RARG,SIAH2,TSC2,PSMD6,ATP6AP2,RNF43
14_Member	GO Biological Processes	GO:1902750	negative regulation of cell cycle G2/M phase transition	-2.85129	-1.27396	8/105	2273,5696,5698,5699,5720,5721,5884,9861	FHL1,PSMB8,PSMB9,PSMB10,PSME1,PSME2,RAD17,PSMD6
14_Member	GO Biological Processes	GO:0044106	cellular amine metabolic process	-2.84666	-1.2714	9/130	18,1312,5696,5698,5699,5720,5721,8942,9861	ABAT,COMT,PSMB8,PSMB9,PSMB10,PSME1,PSME2,KYNU,PSMD6
14_Member	GO Biological Processes	GO:0030178	negative regulation of Wnt signaling pathway	-2.82101	-1.25289	12/213	1452,1649,5204,5696,5698,5699,5720,5721,6478,7249,9861,54894	CSNK1A1,DDIT3,PFDN5,PSMB8,PSMB9,PSMB10,PSME1,PSME2,SIAH2,TSC2,PSMD6,RNF43
14_Member	GO Biological Processes	GO:0006520	cellular amino acid metabolic process	-2.80584	-1.23974	17/367	18,1312,3155,3712,5033,5696,5698,5699,5720,5721,5723,6542,8942,9861,11254,30001,54681	ABAT,COMT,HMGCL,IVD,P4HA1,PSMB8,PSMB9,PSMB10,PSME1,PSME2,PSPH,SLC7A2,KYNU,PSMD6,SLC6A14,ERO1A,P4HTM
14_Member	GO Biological Processes	GO:0001738	morphogenesis of a polarized epithelium	-2.56303	-1.05088	9/143	160,1213,5696,5698,5699,5720,5721,5879,9861	AP2A1,CLTC,PSMB8,PSMB9,PSMB10,PSME1,PSME2,RAC1,PSMD6
14_Member	GO Biological Processes	GO:1903311	regulation of mRNA metabolic process	-2.53799	-1.03026	15/324	207,1153,3312,4343,4615,5696,5698,5699,5720,5721,5976,7072,9475,9861,80149	AKT1,CIRBP,HSPA8,MOV10,MYD88,PSMB8,PSMB9,PSMB10,PSME1,PSME2,UPF1,TIA1,ROCK2,PSMD6,ZC3H12A
14_Member	GO Biological Processes	GO:0090090	negative regulation of canonical Wnt signaling pathway	-2.43093	-0.959953	10/178	1452,1649,5204,5696,5698,5699,5720,5721,6478,9861	CSNK1A1,DDIT3,PFDN5,PSMB8,PSMB9,PSMB10,PSME1,PSME2,SIAH2,PSMD6
14_Member	GO Biological Processes	GO:0030111	regulation of Wnt signaling pathway	-2.42668	-0.959953	16/366	527,1452,1649,4088,5204,5300,5696,5698,5699,5720,5721,6478,7249,9861,10159,54894	ATP6V0C,CSNK1A1,DDIT3,SMAD3,PFDN5,PIN1,PSMB8,PSMB9,PSMB10,PSME1,PSME2,SIAH2,TSC2,PSMD6,ATP6AP2,RNF43
14_Member	GO Biological Processes	GO:0030177	positive regulation of Wnt signaling pathway	-2.41372	-0.954641	10/179	527,4088,5300,5696,5698,5699,5720,5721,9861,10159	ATP6V0C,SMAD3,PIN1,PSMB8,PSMB9,PSMB10,PSME1,PSME2,PSMD6,ATP6AP2
14_Member	GO Biological Processes	GO:0031145	anaphase-promoting complex-dependent catabolic process	-2.20295	-0.811929	6/81	5696,5698,5699,5720,5721,9861	PSMB8,PSMB9,PSMB10,PSME1,PSME2,PSMD6
14_Member	GO Biological Processes	GO:0010948	negative regulation of cell cycle process	-2.11274	-0.754775	15/361	648,2273,2852,3275,4194,4582,5696,5698,5699,5720,5721,5884,9861,10040,10795	BMI1,FHL1,GPER1,PRMT2,MDM4,MUC1,PSMB8,PSMB9,PSMB10,PSME1,PSME2,RAD17,PSMD6,TOM1L1,ZNF268
14_Member	GO Biological Processes	GO:0060070	canonical Wnt signaling pathway	-2.02687	-0.691986	14/335	1452,1649,2625,4088,5204,5300,5696,5698,5699,5720,5721,5916,6478,9861	CSNK1A1,DDIT3,GATA3,SMAD3,PFDN5,PIN1,PSMB8,PSMB9,PSMB10,PSME1,PSME2,RARG,SIAH2,PSMD6
14_Member	GO Biological Processes	GO:0045930	negative regulation of mitotic cell cycle	-1.99524	-0.670167	14/338	2273,3265,3275,4088,4194,4582,5696,5698,5699,5720,5721,5884,9861,10040	FHL1,HRAS,PRMT2,SMAD3,MDM4,MUC1,PSMB8,PSMB9,PSMB10,PSME1,PSME2,RAD17,PSMD6,TOM1L1
14_Member	GO Biological Processes	GO:0090263	positive regulation of canonical Wnt signaling pathway	-1.96712	-0.648499	8/147	4088,5300,5696,5698,5699,5720,5721,9861	SMAD3,PIN1,PSMB8,PSMB9,PSMB10,PSME1,PSME2,PSMD6
14_Member	GO Biological Processes	GO:0010499	proteasomal ubiquitin-independent protein catabolic process	-1.95674	-0.642181	3/23	5696,5698,5699	PSMB8,PSMB9,PSMB10
14_Member	GO Biological Processes	GO:0031146	SCF-dependent proteasomal ubiquitin-dependent protein catabolic process	-1.8778	-0.58676	6/95	5696,5698,5699,5720,5721,9861	PSMB8,PSMB9,PSMB10,PSME1,PSME2,PSMD6
14_Member	GO Biological Processes	GO:1901991	negative regulation of mitotic cell cycle phase transition	-1.8723	-0.582881	11/248	2273,3275,4194,4582,5696,5698,5699,5720,5721,5884,9861	FHL1,PRMT2,MDM4,MUC1,PSMB8,PSMB9,PSMB10,PSME1,PSME2,RAD17,PSMD6
14_Member	GO Biological Processes	GO:0060828	regulation of canonical Wnt signaling pathway	-1.82191	-0.546133	12/286	1452,1649,4088,5204,5300,5696,5698,5699,5720,5721,6478,9861	CSNK1A1,DDIT3,SMAD3,PFDN5,PIN1,PSMB8,PSMB9,PSMB10,PSME1,PSME2,SIAH2,PSMD6
14_Member	GO Biological Processes	GO:1901988	negative regulation of cell cycle phase transition	-1.65945	-0.428755	11/267	2273,3275,4194,4582,5696,5698,5699,5720,5721,5884,9861	FHL1,PRMT2,MDM4,MUC1,PSMB8,PSMB9,PSMB10,PSME1,PSME2,RAD17,PSMD6
15_Summary	GO Biological Processes	GO:0060700	regulation of ribonuclease activity	-6.38857	-4.04741	5/9	4938,4939,4940,7009,8638,207	OAS1,OAS2,OAS3,TMBIM6,OASL,AKT1
15_Member	GO Biological Processes	GO:0060700	regulation of ribonuclease activity	-6.38857	-4.04741	5/9	4938,4939,4940,7009,8638	OAS1,OAS2,OAS3,TMBIM6,OASL
15_Member	GO Biological Processes	GO:0032069	regulation of nuclease activity	-5.40199	-3.22261	6/22	207,4938,4939,4940,7009,8638	AKT1,OAS1,OAS2,OAS3,TMBIM6,OASL
16_Summary	GO Biological Processes	GO:1903827	regulation of cellular protein localization	-6.33682	-4.01131	30/524	207,347,1213,2035,2040,2633,2664,2852,2934,3265,3429,3638,4088,5058,5108,5116,5300,5584,5962,6720,7251,8766,8878,9475,10425,26154,54828,80149,83666,93974,18,972,2625,3133,3312,3965,5530,5595,5879,6279,6850,7009,10312,54602,64175,65010,415116,1509,4600,5908,51652,57617	AKT1,APOD,CLTC,EPB41,STOM,GBP1,GDI1,GPER1,GSN,HRAS,IFI27,INSIG1,SMAD3,PAK1,PCM1,PCNT,PIN1,PRKCI,RDX,SREBF1,TSG101,RAB11A,SQSTM1,ROCK2,ARIH2,ABCA12,BCAS3,ZC3H12A,PARP9,ATP5IF1,ABAT,CD74,GATA3,HLA-E,HSPA8,LGALS9,PPP3CA,MAPK3,RAC1,S100A8,SYK,TMBIM6,TCIRG1,NDFIP2,P3H1,SLC26A6,PIM3,CTSD,MX2,RAP1B,CHMP3,VPS18
16_Member	GO Biological Processes	GO:1903827	regulation of cellular protein localization	-6.33682	-4.01131	30/524	207,347,1213,2035,2040,2633,2664,2852,2934,3265,3429,3638,4088,5058,5108,5116,5300,5584,5962,6720,7251,8766,8878,9475,10425,26154,54828,80149,83666,93974	AKT1,APOD,CLTC,EPB41,STOM,GBP1,GDI1,GPER1,GSN,HRAS,IFI27,INSIG1,SMAD3,PAK1,PCM1,PCNT,PIN1,PRKCI,RDX,SREBF1,TSG101,RAB11A,SQSTM1,ROCK2,ARIH2,ABCA12,BCAS3,ZC3H12A,PARP9,ATP5IF1
16_Member	GO Biological Processes	GO:0090087	regulation of peptide transport	-5.91374	-3.6722	36/731	18,347,972,2040,2625,2633,2664,2852,3133,3265,3312,3429,3638,3965,4088,5058,5108,5116,5530,5595,5879,6279,6720,6850,7009,7251,8766,10312,10425,54602,54828,64175,65010,80149,93974,415116	ABAT,APOD,CD74,STOM,GATA3,GBP1,GDI1,GPER1,HLA-E,HRAS,HSPA8,IFI27,INSIG1,LGALS9,SMAD3,PAK1,PCM1,PCNT,PPP3CA,MAPK3,RAC1,S100A8,SREBF1,SYK,TMBIM6,TSG101,RAB11A,TCIRG1,ARIH2,NDFIP2,BCAS3,P3H1,SLC26A6,ZC3H12A,ATP5IF1,PIM3
16_Member	GO Biological Processes	GO:0051223	regulation of protein transport	-5.05743	-2.95377	33/701	18,347,2040,2625,2633,2664,2852,3133,3265,3312,3429,3638,3965,4088,5058,5108,5116,5530,5595,5879,6720,6850,7009,7251,8766,10312,10425,54602,54828,64175,80149,93974,415116	ABAT,APOD,STOM,GATA3,GBP1,GDI1,GPER1,HLA-E,HRAS,HSPA8,IFI27,INSIG1,LGALS9,SMAD3,PAK1,PCM1,PCNT,PPP3CA,MAPK3,RAC1,SREBF1,SYK,TMBIM6,TSG101,RAB11A,TCIRG1,ARIH2,NDFIP2,BCAS3,P3H1,ZC3H12A,ATP5IF1,PIM3
16_Member	GO Biological Processes	GO:1903829	positive regulation of cellular protein localization	-4.88724	-2.80393	20/324	207,2035,2040,2852,3265,4088,5058,5108,5116,5584,5962,7251,8766,8878,9475,10425,26154,54828,80149,83666	AKT1,EPB41,STOM,GPER1,HRAS,SMAD3,PAK1,PCM1,PCNT,PRKCI,RDX,TSG101,RAB11A,SQSTM1,ROCK2,ARIH2,ABCA12,BCAS3,ZC3H12A,PARP9
16_Member	GO Biological Processes	GO:0070201	regulation of establishment of protein localization	-4.87571	-2.79899	34/748	18,347,1509,2040,2625,2633,2664,2852,3133,3265,3312,3429,3638,3965,4088,5058,5108,5116,5530,5595,5879,6720,6850,7009,7251,8766,10312,10425,54602,54828,64175,80149,93974,415116	ABAT,APOD,CTSD,STOM,GATA3,GBP1,GDI1,GPER1,HLA-E,HRAS,HSPA8,IFI27,INSIG1,LGALS9,SMAD3,PAK1,PCM1,PCNT,PPP3CA,MAPK3,RAC1,SREBF1,SYK,TMBIM6,TSG101,RAB11A,TCIRG1,ARIH2,NDFIP2,BCAS3,P3H1,ZC3H12A,ATP5IF1,PIM3
16_Member	GO Biological Processes	GO:0032386	regulation of intracellular transport	-4.60636	-2.57897	23/425	347,2040,2664,3265,3429,3638,3965,4088,4600,5058,5108,5116,5595,5908,5962,6720,6850,10425,51652,54828,57617,80149,93974	APOD,STOM,GDI1,HRAS,IFI27,INSIG1,LGALS9,SMAD3,MX2,PAK1,PCM1,PCNT,MAPK3,RAP1B,RDX,SREBF1,SYK,ARIH2,CHMP3,BCAS3,VPS18,ZC3H12A,ATP5IF1
16_Member	GO Biological Processes	GO:0033157	regulation of intracellular protein transport	-4.18515	-2.25865	15/225	347,2040,2664,3265,3429,3638,4088,5058,5108,5116,6720,10425,54828,80149,93974	APOD,STOM,GDI1,HRAS,IFI27,INSIG1,SMAD3,PAK1,PCM1,PCNT,SREBF1,ARIH2,BCAS3,ZC3H12A,ATP5IF1
16_Member	GO Biological Processes	GO:0051222	positive regulation of protein transport	-2.58096	-1.06245	18/419	18,2040,2625,2852,3133,3265,3965,4088,5058,5108,5116,5595,5879,6850,7251,10425,54828,80149	ABAT,STOM,GATA3,GPER1,HLA-E,HRAS,LGALS9,SMAD3,PAK1,PCM1,PCNT,MAPK3,RAC1,SYK,TSG101,ARIH2,BCAS3,ZC3H12A
16_Member	GO Biological Processes	GO:0090316	positive regulation of intracellular protein transport	-2.36835	-0.921359	9/153	2040,3265,4088,5058,5108,5116,10425,54828,80149	STOM,HRAS,SMAD3,PAK1,PCM1,PCNT,ARIH2,BCAS3,ZC3H12A
16_Member	GO Biological Processes	GO:0032388	positive regulation of intracellular transport	-2.3132	-0.882738	11/215	2040,3265,4088,5058,5108,5116,5962,6850,10425,54828,80149	STOM,HRAS,SMAD3,PAK1,PCM1,PCNT,RDX,SYK,ARIH2,BCAS3,ZC3H12A
16_Member	GO Biological Processes	GO:1904951	positive regulation of establishment of protein localization	-2.19355	-0.809467	18/457	18,2040,2625,2852,3133,3265,3965,4088,5058,5108,5116,5595,5879,6850,7251,10425,54828,80149	ABAT,STOM,GATA3,GPER1,HLA-E,HRAS,LGALS9,SMAD3,PAK1,PCM1,PCNT,MAPK3,RAC1,SYK,TSG101,ARIH2,BCAS3,ZC3H12A
17_Summary	GO Biological Processes	GO:0007249	I-kappaB kinase/NF-kappaB signaling	-6.10964	-3.84858	20/269	207,389,684,972,3965,4615,4792,6284,6772,7706,8878,8904,9475,10133,10616,27032,51246,54602,64343,80149	AKT1,RHOC,BST2,CD74,LGALS9,MYD88,NFKBIA,S100A13,STAT1,TRIM25,SQSTM1,CPNE1,ROCK2,OPTN,RBCK1,ATP2C1,SHISA5,NDFIP2,AZI2,ZC3H12A
17_Member	GO Biological Processes	GO:0007249	I-kappaB kinase/NF-kappaB signaling	-6.10964	-3.84858	20/269	207,389,684,972,3965,4615,4792,6284,6772,7706,8878,8904,9475,10133,10616,27032,51246,54602,64343,80149	AKT1,RHOC,BST2,CD74,LGALS9,MYD88,NFKBIA,S100A13,STAT1,TRIM25,SQSTM1,CPNE1,ROCK2,OPTN,RBCK1,ATP2C1,SHISA5,NDFIP2,AZI2,ZC3H12A
17_Member	GO Biological Processes	GO:0043122	regulation of I-kappaB kinase/NF-kappaB signaling	-5.07743	-2.97028	17/237	207,389,684,972,3965,4615,6284,6772,7706,8878,8904,10133,10616,27032,51246,54602,80149	AKT1,RHOC,BST2,CD74,LGALS9,MYD88,S100A13,STAT1,TRIM25,SQSTM1,CPNE1,OPTN,RBCK1,ATP2C1,SHISA5,NDFIP2,ZC3H12A
17_Member	GO Biological Processes	GO:0043123	positive regulation of I-kappaB kinase/NF-kappaB signaling	-3.398	-1.67164	12/183	207,389,684,972,3965,4615,6284,7706,10616,27032,51246,54602	AKT1,RHOC,BST2,CD74,LGALS9,MYD88,S100A13,TRIM25,RBCK1,ATP2C1,SHISA5,NDFIP2
18_Summary	GO Biological Processes	GO:0080135	regulation of cellular response to stress	-6.09506	-3.83896	37/749	207,215,567,573,972,1191,1649,2907,3265,3312,3638,3776,3965,4582,4616,4690,5058,5595,6386,6648,6850,7009,7919,8870,9320,9475,9611,9774,9883,26156,26353,29956,64223,80149,83666,84309,84447,896,9500,9802,25994	AKT1,ABCD1,B2M,BAG1,CD74,CLU,DDIT3,GRINA,HRAS,HSPA8,INSIG1,KCNK2,LGALS9,MUC1,GADD45B,NCK1,PAK1,MAPK3,SDCBP,SOD2,SYK,TMBIM6,DDX39B,IER3,TRIP12,ROCK2,NCOR1,BCLAF1,POM121,RSL1D1,HSPB8,CERS2,MLST8,ZC3H12A,PARP9,NUDT16L1,SYVN1,CCND3,MAGED1,DAZAP2,HIGD1A
18_Member	GO Biological Processes	GO:0080135	regulation of cellular response to stress	-6.09506	-3.83896	37/749	207,215,567,573,972,1191,1649,2907,3265,3312,3638,3776,3965,4582,4616,4690,5058,5595,6386,6648,6850,7009,7919,8870,9320,9475,9611,9774,9883,26156,26353,29956,64223,80149,83666,84309,84447	AKT1,ABCD1,B2M,BAG1,CD74,CLU,DDIT3,GRINA,HRAS,HSPA8,INSIG1,KCNK2,LGALS9,MUC1,GADD45B,NCK1,PAK1,MAPK3,SDCBP,SOD2,SYK,TMBIM6,DDX39B,IER3,TRIP12,ROCK2,NCOR1,BCLAF1,POM121,RSL1D1,HSPB8,CERS2,MLST8,ZC3H12A,PARP9,NUDT16L1,SYVN1
18_Member	GO Biological Processes	GO:0032872	regulation of stress-activated MAPK cascade	-1.58116	-0.374596	10/240	207,3265,3965,4616,5058,5595,6386,6850,9611,80149	AKT1,HRAS,LGALS9,GADD45B,PAK1,MAPK3,SDCBP,SYK,NCOR1,ZC3H12A
18_Member	GO Biological Processes	GO:0070302	regulation of stress-activated protein kinase signaling cascade	-1.5597	-0.364737	10/242	207,3265,3965,4616,5058,5595,6386,6850,9611,80149	AKT1,HRAS,LGALS9,GADD45B,PAK1,MAPK3,SDCBP,SYK,NCOR1,ZC3H12A
18_Member	GO Biological Processes	GO:0071902	positive regulation of protein serine/threonine kinase activity	-1.35422	-0.22626	12/336	207,896,972,3265,4616,5058,5595,6850,9500,9802,25994,64223	AKT1,CCND3,CD74,HRAS,GADD45B,PAK1,MAPK3,SYK,MAGED1,DAZAP2,HIGD1A,MLST8
19_Summary	GO Biological Processes	GO:0008285	negative regulation of cell proliferation	-5.50262	-3.31064	36/762	347,567,780,1312,1718,2495,2625,2852,3265,3300,3437,3659,3776,3965,4088,4194,5058,5916,5920,6648,6772,6820,7031,7249,7251,8519,8558,9500,9921,10795,23405,29956,55764,64175,84875,93974	APOD,B2M,DDR1,COMT,DHCR24,FTH1,GATA3,GPER1,HRAS,DNAJB2,IFIT3,IRF1,KCNK2,LGALS9,SMAD3,MDM4,PAK1,RARG,PLAAT4,SOD2,STAT1,SULT2B1,TFF1,TSC2,TSG101,IFITM1,CDK10,MAGED1,RNF10,ZNF268,DICER1,CERS2,IFT122,P3H1,PARP10,ATP5IF1
19_Member	GO Biological Processes	GO:0008285	negative regulation of cell proliferation	-5.50262	-3.31064	36/762	347,567,780,1312,1718,2495,2625,2852,3265,3300,3437,3659,3776,3965,4088,4194,5058,5916,5920,6648,6772,6820,7031,7249,7251,8519,8558,9500,9921,10795,23405,29956,55764,64175,84875,93974	APOD,B2M,DDR1,COMT,DHCR24,FTH1,GATA3,GPER1,HRAS,DNAJB2,IFIT3,IRF1,KCNK2,LGALS9,SMAD3,MDM4,PAK1,RARG,PLAAT4,SOD2,STAT1,SULT2B1,TFF1,TSC2,TSG101,IFITM1,CDK10,MAGED1,RNF10,ZNF268,DICER1,CERS2,IFT122,P3H1,PARP10,ATP5IF1
20_Summary	GO Biological Processes	GO:0019886	antigen processing and presentation of exogenous peptide antigen via MHC class II	-5.28492	-3.11776	11/98	160,972,1213,1509,1514,1520,1785,3123,9871,10053,10437	AP2A1,CD74,CLTC,CTSD,CTSL,CTSS,DNM2,HLA-DRB1,SEC24D,AP1M2,IFI30
20_Member	GO Biological Processes	GO:0019886	antigen processing and presentation of exogenous peptide antigen via MHC class II	-5.28492	-3.11776	11/98	160,972,1213,1509,1514,1520,1785,3123,9871,10053,10437	AP2A1,CD74,CLTC,CTSD,CTSL,CTSS,DNM2,HLA-DRB1,SEC24D,AP1M2,IFI30
20_Member	GO Biological Processes	GO:0002495	antigen processing and presentation of peptide antigen via MHC class II	-5.15691	-3.03066	11/101	160,972,1213,1509,1514,1520,1785,3123,9871,10053,10437	AP2A1,CD74,CLTC,CTSD,CTSL,CTSS,DNM2,HLA-DRB1,SEC24D,AP1M2,IFI30
20_Member	GO Biological Processes	GO:0002504	antigen processing and presentation of peptide or polysaccharide antigen via MHC class II	-5.11529	-3.00462	11/102	160,972,1213,1509,1514,1520,1785,3123,9871,10053,10437	AP2A1,CD74,CLTC,CTSD,CTSL,CTSS,DNM2,HLA-DRB1,SEC24D,AP1M2,IFI30
