# Supplementary material
Source: Preprints.org preprint supplement (doi:10.20944/preprints202004.0323.v1)
Supplement: Supplementary file 1 [file supplementary › Supplementary_Table_9_Differential_splicing_results_upon_DSCAM-AS1_silencing.xlsx]

## Sheet: Summary
events	regulation	number	total
APA	inclusion	677
APA	exclusion	649	1326
ATSS	inclusion	296
aTSS	exclusion	272	568
SE	inclusion	68
SE	exclusion	51	119
A5SS	inclusion	16
A5SS	exclusion	10	26
A3SS	inclusion	8
A3SS	exclusion	16	24
RI	inclusion	6
RI	exclusion	10	16
AF	inclusion	2
AF	exclusion	3	5
AL	inclusion	1
AL	exclusion	0	1
		total	2085

## Sheet: All_detected_events
gene	symbol	node	coord	strand	type	PSI(LNA-DSCAM-AS1)	PSI(LNA-CTRL)	DeltaPsi(PSI(LNA-DSCAM-AS1) - PSI(LNA-CTRL))	probability	complexity	entropy
ENSG00000124608.4	AARS2	8	chr6:44306494-44306532	-	ES	0.77541	0.93735	-0.16194	0.935	K1	0.8682
ENSG00000157426.13	AASDH	24	chr4:56338605-56338791	-	APA	0.15331	0.031434	0.12187	0.904	K2	0.7186
ENSG00000154265.15	ABCA5	53	chr17:69247376-69247644	-	APA	0.47705	0.76392	-0.28687	0.932	K3	1.5282
ENSG00000154265.15	ABCA5	28	chr17:69277641-69277842	-	ES	0.87719	0.97726	-0.10007	0.924	K4	3.0816
ENSG00000131269.15	ABCB7	28	chrX:75053282-75053283	-	APA	0.03202	0.37595	-0.34393	1	K3	1.2193
ENSG00000131269.15	ABCB7	27	chrX:75053284-75053444	-	APA	0.22128	0.021514	0.19976	0.957	K3	1.2193
ENSG00000103222.18	ABCC1	38	chr16:16141526-16143062	+	APA	0.911	0.77521	0.13579	0.999	K1	0.8024
ENSG00000103222.18	ABCC1	37	chr16:16141173-16141525	+	APA	0.089165	0.22438	-0.13522	0.997	K1	0.8024
ENSG00000124574.14	ABCC10	3	chr6:43427968-43428139	+	ES	0.7821	0.55654	0.22556	0.93	K3	1.8916
ENSG00000117528.11	ABCD3	28	chr1:94518497-94518663	+	APA	0.12387	0.25562	-0.13175	0.9	K2	1.0156
ENSG00000144827.8	ABHD10	3	chr3:111979035-111979203	+	aTSS	0.2211	0.024813	0.19629	0.958	K2	1.3839
ENSG00000136754.17	ABI1	3	chr10:26860972-26860986	-	aTSS	0.078406	0.24643	-0.16803	0.946	K3	1.9172
ENSG00000267751.5	AC009005.1	8	chr19:567433-567624	-	APA	0.6176	0.049138	0.56846	1	K2	1.281
ENSG00000237732.9	AC010980.1	9	chr2:222321513-222321659	+	APA	0.96156	0.86442	0.1	0.917	K2	0.6964
ENSG00000225335.3	AC016027.1	2	chr22:18078055-18078775	-	aTSS	0.74082	0.95823	-0.21742	0.912	K1	0.9818
ENSG00000225335.3	AC016027.1	1	chr22:18078776-18078884	-	aTSS	0.26011	0.042889	0.21722	0.907	K1	0.9818
ENSG00000265778.2	AC018413.1	4	chr18:76492890-76493918	+	APA	0.41938	0.69517	-0.27579	0.921	K1	0.98
ENSG00000265778.2	AC018413.1	3	chr18:76492757-76492889	+	APA	0.58493	0.30778	0.27715	0.921	K1	0.98
ENSG00000230606.10	AC092683.1	4	chr2:97423177-97423256	-	aTSS	0.25126	0.065997	0.18527	0.929	K2	1.5594
ENSG00000234996.4	AC098934.2	4	chr1:202873294-202874326	+	APA	0.64002	0.42828	0.21173	0.915	K1	0.9884
ENSG00000234996.4	AC098934.2	5	chr1:202874327-202875241	+	APA	0.3626	0.57471	-0.21212	0.908	K1	0.9884
ENSG00000214135.8	AC132008.2	17	chr3:197614286-197614622	-	APA	0.14824	0.018165	0.13008	0.938	K1	0.853
ENSG00000214135.8	AC132008.2	18	chr3:197614027-197614285	-	APA	0.85093	0.98171	-0.13078	0.92	K1	0.853
ENSG00000281571.2	AC241585.3	2	chr1:145215906-145215938	+	APA	0.20125	0.55776	-0.3565	0.978	K1	0.9994
ENSG00000281571.2	AC241585.3	1	chr1:145214851-145215905	+	APA	0.79891	0.44151	0.35739	0.968	K1	0.9994
ENSG00000177646.18	ACAD9	31	chr3:128913101-128913104	+	APA	0.0034277	0.22441	-0.22098	0.992	K3	2.242
ENSG00000177646.18	ACAD9	32	chr3:128913105-128913114	+	APA	0.0034601	0.10439	-0.10093	0.987	K3	2.242
ENSG00000078124.11	ACER3	32	chr11:77020601-77020700	+	APA	0.20625	0.053868	0.15238	0.924	K3	2.4566
ENSG00000101473.16	ACOT8	2	chr20:45857372-45857397	-	aTSS	0.30308	0.081942	0.22114	0.923	K2	1.4612
ENSG00000162836.11	ACP6	1	chr1:147670284-147670496	-	aTSS	0.32134	0.014724	0.30661	0.962	K2	1.0615
ENSG00000072110.13	ACTN1	1	chr14:68979263-68979440	-	aTSS	0.42187	0.32402	0.1	0.977	K2	1.4319
ENSG00000121989.14	ACVR2A	18	chr2:147927080-147927504	+	APA	0.35554	0.074662	0.28088	0.972	K2	1.8129
ENSG00000121989.14	ACVR2A	19	chr2:147927505-147927929	+	APA	0.43558	0.69828	-0.2627	0.936	K2	1.8129
ENSG00000151388.10	ADAMTS12	27	chr5:33527181-33527366	-	APA	0.44058	0.030673	0.4099	0.939	K1	0.9901
ENSG00000151388.10	ADAMTS12	28	chr5:33523535-33527180	-	APA	0.5594	0.97093	-0.41153	0.931	K1	0.9901
ENSG00000173175.14	ADCY5	27	chr3:123284446-123284577	-	APA	0.28285	0.018653	0.2642	0.976	K2	1.7422
ENSG00000173175.14	ADCY5	28	chr3:123283944-123284445	-	APA	0.46864	0.6752	-0.20656	0.912	K2	1.7422
ENSG00000111452.12	ADGRD1	36	chr12:131139289-131141247	+	APA	0.27824	0.030512	0.24773	0.948	K3	0.9952
ENSG00000111452.12	ADGRD1	35	chr12:131139264-131139288	+	APA	0.42785	0.062829	0.36502	0.916	K3	0.9952
ENSG00000128271.21	ADORA2A	13	chr22:24440583-24441173	+	APA	0.13969	0.35903	-0.21935	0.961	K2	1.0984
ENSG00000128271.21	ADORA2A	14	chr22:24441174-24442356	+	APA	0.83609	0.6213	0.21479	0.932	K2	1.0984
ENSG00000144843.11	ADPRH	12	chr3:119588065-119588213	+	APA	0.019512	0.18297	-0.16346	0.945	K2	0.9069
ENSG00000144843.11	ADPRH	13	chr3:119588214-119589945	+	APA	0.98093	0.81409	0.16684	0.942	K2	0.9069
ENSG00000239900.12	ADSL	1	chr22:40346500-40346502	+	aTSS	0.016496	0.34049	-0.32399	1	K2	1.3481
ENSG00000239900.12	ADSL	2	chr22:40346503-40346517	+	aTSS	0.9305	0.62184	0.30866	0.987	K2	1.3481
ENSG00000196526.10	AFAP1	21	chr4:7763567-7763791	-	APA	0.1265	0.002812	0.12369	0.995	K2	1.9684
ENSG00000072364.12	AFF4	2	chr5:132963515-132963618	-	aTSS	0.50507	0.027238	0.47783	0.92	K2	0.8568
ENSG00000177674.15	AGTRAP	13	chr1:11750410-11750710	+	APA	0.15157	0.01541	0.13616	0.957	K3	1.5264
ENSG00000168710.17	AHCYL1	25	chr1:110023736-110023741	+	APA	0.35972	0.56472	-0.205	0.982	K2	1.2065
ENSG00000168710.17	AHCYL1	24	chr1:110022390-110023735	+	APA	0.60536	0.41413	0.19123	0.971	K2	1.2065
ENSG00000158467.16	AHCYL2	25	chr7:129427221-129430211	+	APA	0.75465	0.44039	0.31425	0.928	K2	1.4833
ENSG00000135541.20	AHI1	49	chr6:135284896-135285184	-	APA	0.1642	0.017931	0.14627	0.962	K3	1.9033
ENSG00000004455.16	AK2	4	chr1:33036871-33036877	-	aTSS	0.42696	0.32651	0.10045	0.936	K3	2.1247
ENSG00000231365.5	AL359915.2	2	chr1:119140425-119140729	+	aTSS	0.76002	0.15238	0.60764	0.964	K2	0.9772
ENSG00000231365.5	AL359915.2	3	chr1:119140730-119140793	+	aTSS	0.23944	0.85211	-0.61268	0.958	K2	0.9772
ENSG00000228748.2	AL450306.1	1	chr10:77782866-77783165	+	aTSS	0.26544	0.090081	0.17536	0.914	K1	0.8488
ENSG00000228748.2	AL450306.1	2	chr10:77783166-77783329	+	aTSS	0.73428	0.91053	-0.17625	0.908	K1	0.8488
ENSG00000237491.8	AL669831.5	2	chr1:784760-784977	+	APA	0.36236	0.7776	-0.41524	0.964	K2	1.536
ENSG00000170017.12	ALCAM	1	chr3:105366909-105366917	+	aTSS	0.10769	0.0079368	0.1	0.978	K2	1.4577
ENSG00000170017.12	ALCAM	29	chr3:105576862-105576900	+	APA	0.63033	0.41766	0.21267	0.962	K2	1.3654
ENSG00000170017.12	ALCAM	28	chr3:105575915-105576861	+	APA	0.35681	0.54911	-0.1923	0.929	K2	1.3654
ENSG00000170017.12	ALCAM	3	chr3:105367343-105367481	+	aTSS	0.78569	0.99179	-0.20611	0.922	K2	1.4577
ENSG00000214160.9	ALG3	4	chr3:184248950-184248950	-	aTSS	0.57832	0.11735	0.46097	0.967	K3	0.9997
ENSG00000137760.14	ALKBH8	18	chr11:107504598-107504657	-	APA	0.87196	0.97561	-0.10365	0.907	K1	0.7654
ENSG00000137760.14	ALKBH8	17	chr11:107504658-107505215	-	APA	0.12957	0.024509	0.10506	0.902	K1	0.7654
ENSG00000178038.16	ALS2CL	43	chr3:46670572-46670598	-	APA	0.24841	0.010037	0.23837	0.977	K3	1.7139
ENSG00000242110.7	AMACR	17	chr5:33988084-33988306	-	APA	0.31671	0.66194	-0.34523	0.972	K2	1.4974
ENSG00000242110.7	AMACR	19	chr5:33986178-33987173	-	APA	0.1743	0.047801	0.1265	0.928	K2	1.4974
ENSG00000242110.7	AMACR	18	chr5:33987174-33988083	-	APA	0.53462	0.31306	0.22156	0.918	K2	1.4974
ENSG00000133805.15	AMPD3	37	chr11:10505813-10505884	+	APA	0.060932	0.47446	-0.41353	0.967	K3	1.9886
ENSG00000196704.11	AMZ2	15	chr17:68257156-68257156	+	APA	0.215	0.0021342	0.21286	0.991	K2	1.7218
ENSG00000196704.11	AMZ2	13	chr17:68256814-68257154	+	APA	0.66984	0.99431	-0.32448	0.971	K2	1.7218
ENSG00000185722.16	ANKFY1	33	chr17:4167836-4167911	-	APA	0.94809	0.84913	0.1	0.956	K2	0.8778
ENSG00000088448.14	ANKRD10	7	chr13:110900530-110900661	-	ES	0.43426	0.22812	0.20614	0.921	K4	2.5022
ENSG00000198720.12	ANKRD13B	7	chr17:29608000-29608110	+	AD	0.92545	0.76979	0.15566	0.903	K1	0.7791
ENSG00000137494.13	ANKRD42	7	chr11:83194509-83194644	+	aTSS	0.15705	0.025241	0.13181	0.935	K2	1.1757
ENSG00000151458.11	ANKRD50	5	chr4:124667359-124667514	-	APA	0.41694	0.30052	0.11641	0.948	K1	0.997
ENSG00000151458.11	ANKRD50	6	chr4:124664052-124667358	-	APA	0.58334	0.69931	-0.11597	0.94	K1	0.997
ENSG00000177119.15	ANO6	4	chr12:45216120-45216391	+	aTSS	0.27901	0.045773	0.23324	0.987	K2	1.5872
ENSG00000143401.14	ANP32E	10	chr1:150220538-150220761	-	APA	0.13061	0.030608	0.10001	0.951	K2	1.889
ENSG00000213983.11	AP1G2	59	chr14:23559576-23559607	-	APA	0.08711	0.25046	-0.16335	0.9	K3	1.3681
ENSG00000072958.8	AP1M1	20	chr19:16234785-16235345	+	APA	0.70183	0.83473	-0.1329	0.916	K2	0.9434
ENSG00000072958.8	AP1M1	19	chr19:16234765-16234784	+	APA	0.29672	0.16449	0.13224	0.906	K2	0.9434
ENSG00000132842.13	AP3B1	2	chr5:78294452-78294692	-	aTSS	0.15884	0.28931	-0.13047	0.929	K1	0.866
ENSG00000132842.13	AP3B1	1	chr5:78294693-78294755	-	aTSS	0.83967	0.71087	0.1288	0.925	K1	0.866
ENSG00000221838.9	AP4M1	28	chr7:100107180-100109039	+	APA	0.91037	0.69197	0.21839	0.932	K2	0.9364
ENSG00000221838.9	AP4M1	27	chr7:100107149-100107179	+	APA	0.089134	0.3065	-0.21737	0.925	K2	0.9364
ENSG00000125843.10	AP5S1	4	chr20:3820703-3820758	+	AD	0.92309	0.82549	0.1	0.911	K1	0.6604
ENSG00000138613.13	APH1B	15	chr15:63305802-63306326	+	APA	0.3784	0.22008	0.15832	0.981	K2	1.5741
ENSG00000084234.16	APLP2	1	chr11:130069837-130069893	+	aTSS	0.014586	0.41438	-0.39979	0.953	K3	1.3642
ENSG00000179750.15	APOBEC3B	15	chr22:38992762-38992784	+	APA	0.46786	0.09046	0.3774	0.97	K2	1.5246
ENSG00000179750.15	APOBEC3B	14	chr22:38992547-38992761	+	APA	0.16596	0.44201	-0.27605	0.931	K2	1.5246
ENSG00000198931.10	APRT	2	chr16:88811921-88811925	-	aTSS	0.66278	0.48383	0.17895	0.95	K2	1.4218
ENSG00000198931.10	APRT	1	chr16:88811926-88811944	-	aTSS	0.16405	0.38446	-0.22041	0.94	K2	1.4218
ENSG00000137074.18	APTX	32	chr9:32972763-32973164	-	APA	0.38168	0.0083114	0.37337	0.958	K3	2.0905
ENSG00000169083.16	AR	2	chrX:67544036-67544819	+	aTSS	0.31141	0.012974	0.29843	0.978	K2	1.245
ENSG00000078061.12	ARAF	23	chrX:47571901-47571920	+	APA	0.62429	0.49763	0.12665	0.925	K1	1
ENSG00000078061.12	ARAF	22	chrX:47571323-47571900	+	APA	0.37567	0.50182	-0.12615	0.904	K1	1
ENSG00000095139.13	ARCN1	2	chr11:118572424-118572452	+	aTSS	0.74365	0.63831	0.10535	0.94	K2	0.9634
ENSG00000095139.13	ARCN1	3	chr11:118572453-118572550	+	aTSS	0.25708	0.36324	-0.10616	0.919	K2	0.9634
ENSG00000242247.10	ARFGAP3	2	chr22:42857240-42857294	-	aTSS	0.70498	0.93933	-0.23435	0.96	K2	0.9518
ENSG00000242247.10	ARFGAP3	1	chr22:42857295-42857402	-	aTSS	0.26205	0.063255	0.1988	0.902	K2	0.9518
ENSG00000145819.15	ARHGAP26	28	chr5:143222358-143223194	+	APA	0.70605	0.46952	0.23653	0.928	K2	1.5709
ENSG00000134909.18	ARHGAP32	12	chr11:129040928-129041009	-	ES	0.74454	0.92429	-0.17975	0.929	K1	0.807
ENSG00000074964.16	ARHGEF10L	19	chr1:17634548-17634562	+	ES	0.93534	0.81104	0.12429	0.903	K2	0.96
ENSG00000240771.6	ARHGEF25	11	chr12:57614016-57614119	+	ES	0.93486	0.8246	0.11026	0.902	K1	0.6917
ENSG00000054267.21	ARID4B	24	chr1:235213769-235214026	-	ES	0.89591	0.77647	0.11944	0.943	K1	0.8211
ENSG00000152219.4	ARL14EP	4	chr11:30330886-30331374	+	ES	0.8425	0.94208	-0.099995	0.922	K3	1.1907
ENSG00000184867.13	ARMCX2	24	chrX:101655467-101657086	-	APA	0.11123	0.0060324	0.1052	0.98	K3	1.4385
ENSG00000184867.13	ARMCX2	25	chrX:101655281-101655466	-	APA	0.71984	0.94883	-0.229	0.969	K3	1.4385
ENSG00000184867.13	ARMCX2	23	chrX:101657087-101657092	-	APA	0.14426	0.015178	0.12908	0.94	K3	1.4385
ENSG00000184867.13	ARMCX2	15	chrX:101658526-101658569	-	AA	0.21573	0.47148	-0.25576	0.915	K4	2.4338
ENSG00000203993.4	ARRDC1-AS1	1	chr9:137618814-137618906	-	aTSS	0.83736	0.56459	0.27277	0.904	K1	0.9536
ENSG00000100299.17	ARSA	7	chr22:50627556-50627792	-	ES	0.83709	0.95184	-0.11475	0.905	K2	1.441
ENSG00000164291.16	ARSK	17	chr5:95603681-95605064	+	APA	0.46338	0.63415	-0.17076	0.918	K1	0.9936
ENSG00000188611.14	ASAH2	18	chr10:50196773-50196919	-	ES	0.93833	0.80488	0.13345	0.931	K1	0.7669
ENSG00000235919.4	ASH1L-AS1	5	chr1:155563647-155563944	+	APA	0.71285	0.92389	-0.21103	0.94	K1	0.9982
ENSG00000235919.4	ASH1L-AS1	4	chr1:155563250-155563646	+	APA	0.2849	0.077885	0.20702	0.907	K1	0.9982
ENSG00000169696.15	ASPSCR1	18	chr17:82007435-82009036	+	aTSS	0.59074	0.82036	-0.22962	0.927	K2	0.999
ENSG00000169696.15	ASPSCR1	17	chr17:82006642-82007434	+	aTSS	0.40368	0.14085	0.26282	0.925	K2	0.999
ENSG00000162174.12	ASRGL1	21	chr11:62392586-62393406	+	APA	0.93651	0.69669	0.23982	0.992	K2	1.0815
ENSG00000162174.12	ASRGL1	20	chr11:62392569-62392585	+	APA	0.040441	0.21863	-0.17819	0.925	K2	1.0815
ENSG00000119778.14	ATAD2B	33	chr2:23751803-23752087	-	APA	0.12944	0.0021221	0.12732	0.996	K1	0.8135
ENSG00000119778.14	ATAD2B	34	chr2:23748671-23751802	-	APA	0.87027	0.99783	-0.12756	0.992	K1	0.8135
ENSG00000170653.18	ATF7	8	chr12:53543297-53543329	-	AD	0.70218	0.57974	0.12244	0.902	K2	1.2108
ENSG00000166669.13	ATF7IP2	24	chr16:10481836-10482118	+	APA	0.2566	0.041041	0.21556	0.988	K2	1.8736
ENSG00000175224.16	ATG13	2	chr11:46617563-46617576	+	aTSS	0.88681	0.76931	0.1175	0.901	K3	1.075
ENSG00000057663.14	ATG5	3	chr6:106325526-106325657	-	aTSS	0.22623	0.38298	-0.15675	0.94	K2	1.5701
ENSG00000119787.13	ATL2	21	chr2:38295901-38295907	-	APA	0.42802	0.31475	0.11326	0.908	K2	1.1535
ENSG00000152234.15	ATP5A1	3	chr18:46098297-46098315	-	aTSS	0.92043	0.80358	0.11685	0.933	K2	1.0086
ENSG00000152234.15	ATP5A1	2	chr18:46098316-46098353	-	aTSS	0.023794	0.14338	-0.11958	0.93	K2	1.0086
ENSG00000159199.13	ATP5G1	14	chr17:48895655-48895868	+	APA	0.99539	0.75784	0.23754	0.995	K2	1.3258
ENSG00000159199.13	ATP5G1	15	chr17:48895869-48895869	+	APA	0.0046246	0.13161	-0.12699	0.993	K2	1.3258
ENSG00000159199.13	ATP5G1	16	chr17:48895870-48895871	+	APA	0.0045561	0.11465	-0.11009	0.988	K2	1.3258
ENSG00000123191.14	ATP7B	35	chr13:51934693-51935029	-	APA	0.0066545	0.15095	-0.14429	0.987	K3	1.647
ENSG00000143515.16	ATP8B2	32	chr1:154349460-154351307	+	APA	0.66515	0.44727	0.21788	0.997	K1	0.9998
ENSG00000143515.16	ATP8B2	31	chr1:154348840-154349459	+	APA	0.33254	0.55043	-0.21789	0.996	K1	0.9998
ENSG00000171953.15	ATPAF2	2	chr17:18039076-18039168	-	aTSS	0.78819	0.58398	0.20421	0.959	K2	1
ENSG00000171953.15	ATPAF2	3	chr17:18038881-18039075	-	aTSS	0.20921	0.41583	-0.20662	0.95	K2	1
ENSG00000066427.21	ATXN3	44	chr14:92038652-92044774	-	APA	0.98459	0.68845	0.29614	0.983	K2	0.9975
ENSG00000066427.21	ATXN3	42	chr14:92044806-92044958	-	APA	0.014609	0.31075	-0.29614	0.982	K2	0.9975
ENSG00000184809.12	B3GALT5-AS1	1	chr21:39612442-39612821	-	aTSS	0.23712	0.52115	-0.28403	0.944	K1	0.9998
ENSG00000184809.12	B3GALT5-AS1	2	chr21:39612297-39612441	-	aTSS	0.76165	0.4787	0.28294	0.934	K1	0.9998
ENSG00000112309.10	B3GAT2	6	chr6:70857213-70861749	-	APA	0.44655	0.16556	0.281	0.919	K1	0.9984
ENSG00000112309.10	B3GAT2	7	chr6:70856679-70857212	-	APA	0.55296	0.83434	-0.28138	0.916	K1	0.9984
ENSG00000170340.10	B3GNT2	3	chr2:62222212-62224549	+	APA	0.76127	0.65129	0.10998	0.974	K1	0.9565
ENSG00000170340.10	B3GNT2	4	chr2:62224550-62224731	+	APA	0.23792	0.34873	-0.11081	0.97	K1	0.9565
ENSG00000135454.13	B4GALNT1	26	chr12:57626172-57626427	-	APA	0.58989	0.45446	0.13544	0.995	K2	1.738
ENSG00000002330.13	BAD	8	chr11:64269834-64270268	-	APA	0.41983	0.1333	0.28653	0.912	K2	1.5168
ENSG00000187172.15	BAGE2	2	chr21:10413532-10413754	+	aTSS	0.95008	0.63051	0.31957	0.902	K1	0.9202
ENSG00000175866.15	BAIAP2	39	chr17:81115818-81116048	+	APA	0.14808	0.01048	0.1376	0.965	K2	0.9101
ENSG00000175866.15	BAIAP2	40	chr17:81116049-81116224	+	APA	0.84468	0.97885	-0.13417	0.949	K2	0.9101
ENSG00000226137.5	BAIAP2-AS1	4	chr17:81029702-81033398	-	APA	0.24626	0.43232	-0.18605	0.923	K1	0.989
ENSG00000226137.5	BAIAP2-AS1	5	chr17:81029130-81029701	-	APA	0.75368	0.56799	0.18569	0.913	K1	0.989
ENSG00000138686.9	BBS7	3	chr4:121870278-121870450	-	aTSS	0.32485	0.03581	0.28904	0.939	K2	0.9995
ENSG00000064787.13	BCAS1	9	chr20:53975389-53975430	-	ES	0.77195	0.94517	-0.17322	0.927	K3	1.8246
ENSG00000141376.22	BCAS3	31	chr17:61353588-61354502	+	ES	0.75668	0.55863	0.19806	0.992	K4	2.2074
ENSG00000171791.12	BCL2	8	chr18:63123346-63127034	-	APA	0.72658	0.84348	-0.1169	0.984	K1	0.8796
ENSG00000171791.12	BCL2	7	chr18:63127035-63128759	-	APA	0.27296	0.15667	0.11629	0.982	K1	0.8796
ENSG00000126453.9	BCL2L12	17	chr19:49673860-49673915	+	APA	0.45234	0.61885	-0.16651	0.938	K2	0.9989
ENSG00000126453.9	BCL2L12	16	chr19:49673698-49673859	+	APA	0.54779	0.37947	0.16832	0.93	K2	0.9989
ENSG00000099968.17	BCL2L13	7	chr22:17638772-17638810	+	aTSS	0.094118	0.39607	-0.30195	0.916	K2	0.9894
ENSG00000113916.17	BCL6	21	chr3:187721377-187721386	-	APA	0.011963	0.24603	-0.23406	0.98	K2	1.055
ENSG00000133134.11	BEX2	7	chrX:103309502-103309981	-	APA	0.197	0.021052	0.17595	0.912	K2	0.9577
ENSG00000166681.13	BEX3	2	chrX:103376395-103376406	+	aTSS	0.076484	0.25566	-0.17918	1	K2	1.1049
ENSG00000166681.13	BEX3	1	chrX:103376340-103376394	+	aTSS	0.9235	0.71329	0.21021	1	K2	1.1049
ENSG00000103429.10	BFAR	16	chr16:14668069-14669236	+	APA	0.85724	0.9669	-0.10967	0.953	K1	0.7187
ENSG00000103429.10	BFAR	15	chr16:14667635-14668068	+	APA	0.14317	0.033258	0.10991	0.942	K1	0.7187
ENSG00000151746.13	BICD1	1	chr12:32106835-32107150	+	aTSS	0.041309	0.23586	-0.19455	0.924	K2	1.8548
ENSG00000108578.14	BLMH	20	chr17:30248205-30248821	-	APA	0.91642	0.68799	0.22842	0.913	K2	1.0794
ENSG00000104081.13	BMF	12	chr15:40087893-40091717	-	APA	0.45037	0.27236	0.17801	0.908	K2	1.8643
ENSG00000140299.11	BNIP2	23	chr15:59663366-59663378	-	APA	0.23859	0.1254	0.11319	0.951	K3	1.5033
ENSG00000178096.8	BOLA1	5	chr1:149900793-149900798	+	APA	0.002285	0.18099	-0.1787	1	K1	0.7483
ENSG00000178096.8	BOLA1	4	chr1:149900123-149900792	+	APA	0.99767	0.81812	0.17955	1	K1	0.7483
ENSG00000171634.16	BPTF	45	chr17:67982289-67982551	+	APA	0.0017382	0.13905	-0.13731	0.993	K3	1.6971
ENSG00000171634.16	BPTF	46	chr17:67982552-67982569	+	APA	0.44408	0.28491	0.15916	0.926	K3	1.6971
ENSG00000012048.20	BRCA1	13	chr17:43125271-43125276	-	AD	0.72611	0.51532	0.21079	0.909	K4	2.7727
ENSG00000185658.13	BRWD1	64	chr21:39184176-39187245	-	APA	0.82772	0.99638	-0.16865	0.998	K1	0.8813
ENSG00000185658.13	BRWD1	63	chr21:39187246-39187417	-	APA	0.17255	0.0035217	0.16903	0.998	K1	0.8813
ENSG00000160058.18	BSDC1	25	chr1:32366296-32366300	-	APA	0.42995	0.30162	0.12833	1	K3	1.5643
ENSG00000160058.18	BSDC1	27	chr1:32365113-32365170	-	APA	0.14639	0.25272	-0.10633	0.988	K3	1.5643
ENSG00000172270.18	BSG	23	chr19:583431-583487	+	APA	0.57039	0.47198	0.1	0.929	K3	1.3399
ENSG00000172270.18	BSG	5	chr19:572578-572593	+	aTSS	0.39978	0.52252	-0.12274	0.92	K3	1.8293
ENSG00000169814.12	BTD	17	chr3:15645583-15645715	+	APA	0.18266	0.0025354	0.18013	1	K3	1.3661
ENSG00000154640.14	BTG3	10	chr21:17594090-17594332	-	APA	0.43283	0.14147	0.29136	0.904	K1	0.998
ENSG00000166167.17	BTRC	5	chr10:101461981-101462058	+	ES	0.93536	0.83552	0.1	0.949	K3	1.6896
ENSG00000136261.14	BZW2	2	chr7:16646160-16646288	+	aTSS	0.081	0.18826	-0.10726	0.925	K1	0.8687
ENSG00000136261.14	BZW2	1	chr7:16646131-16646159	+	aTSS	0.9191	0.81356	0.10555	0.918	K1	0.8687
ENSG00000182919.14	C11orf54	9	chr11:93747302-93747448	+	ES	0.90195	0.72093	0.18102	0.917	K3	1.7853
ENSG00000150776.17	C11orf57	6	chr11:112074359-112074916	+	AD	0.83026	0.58313	0.24713	0.933	K1	0.9982
ENSG00000133641.17	C12orf29	3	chr12:88035536-88035561	+	aTSS	0.41847	0.7978	-0.37933	0.99	K3	1.482
ENSG00000133641.17	C12orf29	2	chr12:88035505-88035535	+	aTSS	0.29464	0.013926	0.28071	0.913	K3	1.482
ENSG00000157895.11	C12orf43	14	chr12:121003876-121003891	-	APA	0.34911	0.16709	0.18203	0.976	K2	1.5372
ENSG00000157895.11	C12orf43	15	chr12:121003793-121003875	-	APA	0.42905	0.60854	-0.17949	0.91	K2	1.5372
ENSG00000111678.10	C12orf57	14	chr12:6945997-6946002	+	APA	0.29898	0.055699	0.24328	0.919	K2	0.9823
ENSG00000111678.10	C12orf57	13	chr12:6945771-6945996	+	APA	0.70209	0.9447	-0.24261	0.911	K2	0.9823
ENSG00000140104.13	C14orf79	3	chr14:104986336-104986695	+	aTSS	0.62315	0.28645	0.3367	0.927	K2	1.7676
ENSG00000140104.13	C14orf79	1	chr14:104985793-104986278	+	aTSS	0.010976	0.21976	-0.20878	0.91	K2	1.7676
ENSG00000185347.17	C14orf80	9	chr14:105491367-105491522	+	aTSS	0.25467	0.80403	-0.54935	0.924	K3	0.9998
ENSG00000154102.10	C16orf74	7	chr16:85710286-85710307	-	AA	0.31041	0.51914	-0.20873	0.906	K2	1.5282
ENSG00000186665.9	C17orf58	1	chr17:67993553-67993649	-	aTSS	0.9223	0.21394	0.70836	0.999	K2	1.1765
ENSG00000186665.9	C17orf58	2	chr17:67993546-67993552	-	aTSS	0.074568	0.76852	-0.69396	0.997	K2	1.1765
ENSG00000178927.17	C17orf62	5	chr17:82450738-82450741	-	aTSS	0.23539	0.021673	0.21372	0.95	K4	1.5849
ENSG00000141428.16	C18orf21	13	chr18:35978940-35979278	+	APA	0.23796	0.12319	0.11477	0.925	K2	0.9017
ENSG00000131943.17	C19orf12	14	chr19:29701689-29702340	-	APA	0.1474	0.0027105	0.14469	1	K3	1.3603
ENSG00000131943.17	C19orf12	15	chr19:29701163-29701688	-	APA	0.69695	0.83836	-0.14141	0.942	K3	1.3603
ENSG00000228300.13	C19orf24	7	chr19:1279245-1279249	+	APA	0.0038319	0.1845	-0.18067	0.999	K1	0.879
ENSG00000228300.13	C19orf24	6	chr19:1278777-1279244	+	APA	0.99623	0.81601	0.18022	0.992	K1	0.879
ENSG00000119559.15	C19orf25	14	chr19:1474172-1474173	-	APA	0.17605	0.6022	-0.42614	0.939	K3	1.5077
ENSG00000119559.15	C19orf25	13	chr19:1474174-1475258	-	APA	0.54479	0.014233	0.53055	0.909	K3	1.5077
ENSG00000188493.14	C19orf54	21	chr19:40741440-40741693	-	RI	0.73244	0.91122	-0.17878	0.936	K4	1.6578
ENSG00000197223.11	C1D	9	chr2:68042656-68042713	-	APA	0.24292	0.39773	-0.1548	0.995	K2	1.3251
ENSG00000162384.13	C1orf123	21	chr1:53214099-53214136	-	APA	0.26002	0.093161	0.16686	0.914	K2	1.5627
ENSG00000162642.13	C1orf52	1	chr1:85259643-85259672	-	aTSS	0.02094	0.37484	-0.3539	0.963	K2	0.9971
ENSG00000162642.13	C1orf52	2	chr1:85259634-85259642	-	aTSS	0.89917	0.58522	0.31395	0.922	K2	0.9971
ENSG00000101084.17	C20orf24	2	chr20:36605785-36605788	+	aTSS	0.020008	0.29824	-0.27823	0.977	K3	1.9022
ENSG00000168014.16	C2CD3	1	chr11:74170985-74171019	-	aTSS	0.27747	0.55119	-0.27371	0.931	K2	1.8249
ENSG00000188315.7	C3orf62	4	chr3:49268786-49271445	-	APA	0.016362	0.46058	-0.44421	0.956	K1	0.9903
ENSG00000188315.7	C3orf62	5	chr3:49268602-49268785	-	APA	0.98397	0.53788	0.44609	0.925	K1	0.9903
ENSG00000163633.10	C4orf36	21	chr4:86886472-86886796	-	APA	0.075748	0.27523	-0.19948	0.924	K1	0.9402
ENSG00000163633.10	C4orf36	20	chr4:86886797-86887757	-	APA	0.92274	0.72558	0.19715	0.919	K1	0.9402
ENSG00000155621.14	C9orf85	5	chr9:71972692-71973152	+	APA	0.029763	0.14244	-0.11268	0.912	K1	0.7407
ENSG00000007402.11	CACNA2D2	44	chr3:50362802-50362891	-	APA	0.47022	0.94062	-0.4704	0.937	K2	0.9895
ENSG00000151893.14	CACUL1	1	chr10:118755247-118755249	-	aTSS	0.62951	0.78816	-0.15865	0.935	K2	1.0118
ENSG00000151893.14	CACUL1	2	chr10:118754478-118755246	-	aTSS	0.36713	0.21129	0.15584	0.93	K2	1.0118
ENSG00000182985.17	CADM1	23	chr11:115176295-115176326	-	APA	0.011784	0.50426	-0.49248	1	K3	1.6751
ENSG00000182985.17	CADM1	22	chr11:115176327-115176407	-	APA	0.5812	0.0021358	0.57907	1	K3	1.6751
ENSG00000012822.15	CALCOCO1	37	chr12:53711159-53711789	-	APA	0.65887	0.44249	0.21638	0.907	K2	1.5223
ENSG00000128595.16	CALU	15	chr7:128771475-128771477	+	APA	0.42002	0.32068	0.1	0.946	K2	1.6831
ENSG00000128595.16	CALU	14	chr7:128770577-128771474	+	APA	0.28681	0.38425	-0.099995	0.941	K2	1.6831
ENSG00000145349.16	CAMK2D	7	chr4:113761004-113761068	-	aTSS	0.73188	0.15112	0.58076	1	K3	1.7297
ENSG00000145349.16	CAMK2D	2	chr4:113761446-113761451	-	aTSS	0.17619	0.61555	-0.43936	0.972	K3	1.7297
ENSG00000145349.16	CAMK2D	3	chr4:113761417-113761445	-	aTSS	0.074587	0.26719	-0.1926	0.901	K3	1.7297
ENSG00000130559.18	CAMSAP1	22	chr9:135810423-135810680	-	APA	0.38162	0.28073	0.10089	0.923	K1	0.988
ENSG00000130559.18	CAMSAP1	23	chr9:135809581-135810422	-	APA	0.61709	0.71878	-0.1017	0.91	K1	0.988
ENSG00000171735.18	CAMTA1	2	chr1:6785454-6785463	+	aTSS	0.62019	0.76771	-0.14751	0.906	K3	1.7118
ENSG00000171302.16	CANT1	21	chr17:78991717-78993486	-	APA	0.45275	0.55738	-0.10463	0.965	K2	1.5497
ENSG00000171302.16	CANT1	4	chr17:79009779-79009793	-	aTSS	0.19099	0.054679	0.13631	0.948	K3	1.957
ENSG00000112186.11	CAP2	27	chr6:17556660-17556795	+	APA	0.075547	0.32159	-0.24604	0.968	K3	1.7385
ENSG00000112186.11	CAP2	25	chr6:17556565-17556568	+	APA	0.33417	0.12576	0.20841	0.964	K3	1.7385
ENSG00000165233.17	CARD19	10	chr9:93110722-93111187	+	APA	0.072591	0.61053	-0.53793	0.921	K1	0.794
ENSG00000106144.19	CASP2	23	chr7:143305823-143306569	+	APA	0.001383	0.099173	-0.099995	1	K3	2.1102
ENSG00000106144.19	CASP2	21	chr7:143304940-143305071	+	APA	0.22217	0.067783	0.15439	0.922	K3	2.1102
ENSG00000138794.9	CASP6	13	chr4:109689263-109689568	-	APA	0.0068475	0.2375	-0.23065	0.967	K3	1.9024
ENSG00000132906.17	CASP9	9	chr1:15507873-15507907	-	ES	0.87768	0.68392	0.19376	0.905	K2	1.749
ENSG00000172785.18	CBWD1	10	chr9:179017-179021	-	aTSS	0.021239	0.14747	-0.12623	0.968	K4	2.02
ENSG00000172785.18	CBWD1	6	chr9:179043-179045	-	aTSS	0.29464	0.12102	0.17362	0.902	K4	2.02
ENSG00000147996.16	CBWD5	8	chr9:65675906-65675923	+	aTSS	0.20274	0.10219	0.10056	0.973	K4	2.0387
ENSG00000147996.16	CBWD5	43	chr9:65731868-65732241	+	APA	0.30086	0.06677	0.23409	0.956	K1	0.9754
ENSG00000147996.16	CBWD5	44	chr9:65732242-65732393	+	APA	0.70555	0.92804	-0.22249	0.941	K1	0.9754
ENSG00000173894.10	CBX2	2	chr17:79778163-79778193	+	aTSS	0.25539	0.072189	0.18321	0.952	K2	0.8737
ENSG00000173894.10	CBX2	1	chr17:79778132-79778162	+	aTSS	0.74873	0.92667	-0.17794	0.94	K2	0.8737
ENSG00000175455.14	CCDC14	28	chr3:123914622-123915132	-	APA	0.12728	0.0034563	0.12383	0.999	K3	1.5248
ENSG00000165813.18	CCDC186	20	chr10:114124929-114125226	-	APA	0.54207	0.41934	0.12273	0.996	K1	0.9986
ENSG00000165813.18	CCDC186	21	chr10:114120862-114124928	-	APA	0.45643	0.5805	-0.12407	0.995	K1	0.9986
ENSG00000128891.15	CCDC32	9	chr15:40553595-40554127	-	ES	0.84897	0.94641	-0.099995	0.937	K2	0.6968
ENSG00000133773.11	CCDC59	2	chr12:82358787-82358788	-	aTSS	0.46139	0.70616	-0.24477	0.904	K2	0.9984
ENSG00000120647.9	CCDC77	18	chr12:440617-440742	+	ES	0.76022	0.94339	-0.18317	0.931	K1	0.8592
ENSG00000162004.16	CCDC78	9	chr16:726308-726367	-	aTSS	0.44322	0.050566	0.39265	0.992	K3	1.4083
ENSG00000162004.16	CCDC78	8	chr16:726368-726429	-	aTSS	0.22221	0.51678	-0.29457	0.964	K3	1.4083
ENSG00000162004.16	CCDC78	24	chr16:724681-724806	-	ES	0.96173	0.83969	0.12204	0.962	K4	2.4791
ENSG00000108691.9	CCL2	9	chr17:34256817-34257203	+	APA	0.41691	0.944	-0.5271	1	K1	0.9996
ENSG00000108691.9	CCL2	8	chr17:34256722-34256816	+	APA	0.58541	0.057736	0.52767	1	K1	0.9996
ENSG00000100814.17	CCNB1IP1	15	chr14:20311370-20311428	-	APA	0.57514	0.39474	0.1804	0.908	K2	0.9989
ENSG00000100814.17	CCNB1IP1	14	chr14:20311429-20311752	-	APA	0.42509	0.6056	-0.18051	0.905	K2	0.9989
ENSG00000105173.13	CCNE1	16	chr19:29824213-29824280	+	APA	0.88303	0.17143	0.7116	0.993	K2	1.5514
ENSG00000105173.13	CCNE1	15	chr19:29823655-29824212	+	APA	0.020941	0.29519	-0.27425	0.989	K2	1.5514
ENSG00000105173.13	CCNE1	17	chr19:29824281-29824308	+	APA	0.11729	0.54944	-0.43215	0.938	K2	1.5514
ENSG00000221978.11	CCNL2	39	chr1:1387122-1387231	-	APA	0.35893	0.25918	0.1	0.999	K4	2.0957
ENSG00000082258.12	CCNT2	2	chr2:134918822-134918824	+	aTSS	0.7015	0.2166	0.4849	0.91	K2	1.0724
ENSG00000082258.12	CCNT2	1	chr2:134918235-134918821	+	aTSS	0.28858	0.77251	-0.48393	0.9	K2	1.0724
ENSG00000103540.16	CCP110	25	chr16:19553401-19553408	+	APA	0.47314	0.005835	0.4673	0.955	K2	1.3509
ENSG00000103540.16	CCP110	24	chr16:19551478-19553400	+	APA	0.29778	0.82623	-0.52845	0.923	K2	1.3509
ENSG00000107771.15	CCSER2	16	chr10:84477575-84477664	+	ES	0.8241	0.9567	-0.1326	0.958	K3	1.1718
ENSG00000156261.12	CCT8	27	chr21:29056329-29056455	-	APA	0.73002	0.95915	-0.22913	0.987	K2	1.3091
ENSG00000156261.12	CCT8	28	chr21:29056324-29056328	-	APA	0.18868	0.040693	0.14798	0.96	K2	1.3091
ENSG00000122674.11	CCZ1	2	chr7:5898734-5898780	+	aTSS	0.93654	0.79873	0.13781	0.984	K2	0.864
ENSG00000122674.11	CCZ1	1	chr7:5898725-5898733	+	aTSS	0.014784	0.15308	-0.1383	0.967	K2	0.864
ENSG00000167775.10	CD320	13	chr19:8302127-8302316	-	APA	0.79156	0.57073	0.22083	0.947	K1	1
ENSG00000167775.10	CD320	12	chr19:8302317-8302605	-	APA	0.20793	0.43117	-0.22324	0.94	K1	1
ENSG00000116815.15	CD58	3	chr1:116570903-116570984	-	aTSS	0.24446	0.076212	0.16825	0.906	K2	1.4016
ENSG00000019582.14	CD74	17	chr5:150402152-150402250	-	APA	0.23528	0.014701	0.22058	0.944	K2	0.9983
ENSG00000019582.14	CD74	19	chr5:150401670-150401698	-	APA	0.76548	0.98516	-0.21969	0.936	K2	0.9983
ENSG00000110651.11	CD81	6	chr11:2393848-2394094	+	aTSS	0.94995	0.60395	0.346	0.937	K1	0.9954
ENSG00000110651.11	CD81	5	chr11:2391383-2393847	+	aTSS	0.051793	0.39455	-0.34276	0.929	K1	0.9954
ENSG00000140326.12	CDAN1	24	chr15:42727621-42727667	-	AD	0.80786	0.94697	-0.13911	0.933	K2	0.8778
ENSG00000158402.18	CDC25C	7	chr5:138326021-138326054	-	ES	0.85854	0.71007	0.14847	0.927	K3	1.3116
ENSG00000168438.14	CDC40	19	chr6:110230334-110232215	+	APA	0.99706	0.89871	0.1	0.965	K1	0.7988
ENSG00000168438.14	CDC40	18	chr6:110229954-110230333	+	APA	0.0029956	0.10115	-0.099995	0.956	K1	0.7988
ENSG00000198752.10	CDC42BPB	23	chr14:102954198-102954275	-	ES	0.77774	0.67612	0.10162	0.928	K1	0.955
ENSG00000158985.13	CDC42SE2	12	chr5:131394668-131394690	+	APA	0.00088069	0.10353	-0.10265	0.986	K2	0.8109
ENSG00000158985.13	CDC42SE2	1	chr5:131264068-131264074	+	aTSS	0.034115	0.3393	-0.30518	0.934	K2	1.5822
ENSG00000158985.13	CDC42SE2	11	chr5:131393107-131394667	+	APA	0.96773	0.85218	0.11555	0.932	K2	0.8109
ENSG00000111665.11	CDCA3	23	chr12:6844859-6846367	-	APA	0.010775	0.21754	-0.20677	1	K2	0.8993
ENSG00000111665.11	CDCA3	24	chr12:6844799-6844858	-	APA	0.98653	0.5095	0.47702	0.922	K2	0.8993
ENSG00000089486.16	CDIP1	16	chr16:4510739-4511323	-	APA	0.49156	0.02346	0.4681	0.993	K3	1.5683
ENSG00000089486.16	CDIP1	17	chr16:4510675-4510738	-	APA	0.16669	0.4815	-0.31481	0.918	K3	1.5683
ENSG00000248333.8	CDK11B	25	chr1:1635587-1635737	-	APA	0.57907	0.47005	0.10902	0.949	K2	1.535
ENSG00000059758.7	CDK17	3	chr12:96399986-96400074	-	aTSS	0.68399	0.29511	0.38888	0.908	K2	1.4957
ENSG00000156345.17	CDK20	31	chr9:87966441-87966445	-	APA	0.14202	0.0072954	0.13472	0.988	K3	1.5461
ENSG00000135446.16	CDK4	3	chr12:57752354-57752364	-	aTSS	0.22437	0.074423	0.14995	0.996	K3	1.4882
ENSG00000134058.11	CDK7	2	chr5:69234873-69234878	+	aTSS	0.11447	0.38853	-0.27406	0.972	K2	1.9116
ENSG00000123080.10	CDKN2C	7	chr1:50974559-50974633	+	APA	0.58371	0.9693	-0.38559	1	K1	0.9934
ENSG00000123080.10	CDKN2C	6	chr1:50973893-50974558	+	APA	0.41401	0.030498	0.38351	1	K1	0.9934
ENSG00000153046.17	CDYL	15	chr6:4953898-4954256	+	APA	0.20787	0.067889	0.13998	0.924	K3	1.7937
ENSG00000115163.14	CENPA	10	chr2:26794590-26794593	+	APA	0.0073579	0.45411	-0.44675	0.976	K1	0.9766
ENSG00000115163.14	CENPA	9	chr2:26793894-26794589	+	APA	0.99256	0.54639	0.44617	0.964	K1	0.9766
ENSG00000168944.15	CEP120	30	chr5:123345003-123346399	-	APA	0.5858	0.73655	-0.15075	0.953	K1	0.9999
ENSG00000168944.15	CEP120	29	chr5:123346400-123346753	-	APA	0.41543	0.26254	0.15289	0.933	K1	0.9999
ENSG00000103995.13	CEP152	41	chr15:48738151-48739288	-	APA	0.61111	0.44133	0.16978	0.912	K1	0.9999
ENSG00000103995.13	CEP152	42	chr15:48737935-48738150	-	APA	0.39012	0.55852	-0.1684	0.907	K1	0.9999
ENSG00000101639.18	CEP192	58	chr18:13124632-13124995	+	APA	0.52135	0.96286	-0.4415	1	K3	0.9994
ENSG00000101639.18	CEP192	59	chr18:13124996-13125034	+	APA	0.48283	0.037277	0.44555	0.999	K3	0.9994
ENSG00000198707.14	CEP290	59	chr12:88049016-88049019	-	APA	0.053414	0.94986	-0.89645	1	K1	0
ENSG00000198707.14	CEP290	58	chr12:88049020-88049414	-	APA	0.94638	0.04819	0.89819	1	K1	0
ENSG00000183137.14	CEP57L1	22	chr6:109163911-109163932	+	APA	0.017027	0.4205	-0.40347	1	K2	1.5107
ENSG00000183137.14	CEP57L1	21	chr6:109163164-109163910	+	APA	0.68215	0.13252	0.54964	1	K2	1.5107
ENSG00000173588.14	CEP83	1	chr12:94459953-94459988	-	aTSS	0.61025	0.16157	0.44868	0.965	K2	1.3303
ENSG00000173588.14	CEP83	2	chr12:94459947-94459952	-	aTSS	0.26895	0.83968	-0.57072	0.964	K2	1.3303
ENSG00000121289.17	CEP89	2	chr19:32971956-32971963	-	aTSS	0.60608	0.26153	0.34455	0.907	K2	1.3831
ENSG00000121289.17	CEP89	1	chr19:32971964-32971991	-	aTSS	0.32333	0.68241	-0.35909	0.905	K2	1.3831
ENSG00000121289.17	CEP89	14	chr19:32937013-32937120	-	ES	0.19954	0.045645	0.1539	0.904	K1	0.7534
ENSG00000258890.6	CEP95	9	chr17:64516723-64516828	+	ES	0.52276	0.70825	-0.18549	0.949	K6	2.611
ENSG00000182504.10	CEP97	18	chr3:101764847-101765042	+	APA	0.043928	0.30073	-0.2568	0.909	K2	1.4877
ENSG00000134255.13	CEPT1	15	chr1:111185101-111185102	+	APA	0.018611	0.26843	-0.24982	0.944	K2	1.0499
ENSG00000134255.13	CEPT1	14	chr1:111184809-111185100	+	APA	0.36791	0.11004	0.25788	0.912	K2	1.0499
ENSG00000070761.7	CFAP20	11	chr16:58113960-58114030	-	APA	0.74912	0.88675	-0.13763	0.969	K1	0.9013
ENSG00000070761.7	CFAP20	12	chr16:58113588-58113959	-	APA	0.25054	0.11215	0.13839	0.953	K1	0.9013
ENSG00000163001.11	CFAP36	19	chr2:55545076-55545079	+	APA	0.24342	0.019683	0.22374	0.965	K2	0.96
ENSG00000163001.11	CFAP36	18	chr2:55544907-55545075	+	APA	0.75537	0.97658	-0.22121	0.956	K2	0.96
ENSG00000003402.19	CFLAR	24	chr2:201136415-201139877	+	APA	0.46872	0.27286	0.19586	0.902	K2	1.5522
ENSG00000159685.10	CHCHD6	3	chr3:126704241-126704399	+	aTSS	0.1455	0.42221	-0.27671	0.933	K2	0.9903
ENSG00000171316.11	CHD7	18	chr8:60865460-60866474	+	APA	0.39406	0.63161	-0.23754	0.924	K2	1.1985
ENSG00000171316.11	CHD7	16	chr8:60865126-60865133	+	APA	0.59111	0.36832	0.22279	0.904	K2	1.1985
ENSG00000149554.12	CHEK1	25	chr11:125655477-125655586	+	APA	0.24649	0.058517	0.18798	0.987	K2	0.8796
ENSG00000149554.12	CHEK1	26	chr11:125655587-125655710	+	APA	0.75282	0.94082	-0.188	0.981	K2	0.8796
ENSG00000204116.11	CHIC1	11	chrX:73684412-73687102	+	APA	0.76942	0.64004	0.12938	0.983	K2	1.3614
ENSG00000204116.11	CHIC1	10	chrX:73683216-73684411	+	APA	0.078607	0.28028	-0.20167	0.931	K2	1.3614
ENSG00000110172.11	CHORDC1	19	chr11:90201949-90202551	-	APA	0.20996	0.074393	0.13556	0.905	K2	1.2792
ENSG00000170175.10	CHRNB1	22	chr17:7456927-7457329	+	APA	0.24788	0.12764	0.12025	0.952	K2	1.553
ENSG00000159208.15	CIART	14	chr1:150286738-150286776	+	APA	0.53266	0.37815	0.1545	0.94	K2	0.9997
ENSG00000159208.15	CIART	15	chr1:150286777-150287093	+	APA	0.46646	0.61908	-0.15261	0.933	K2	0.9997
ENSG00000186162.10	CIDECP	8	chr3:10017497-10017752	-	APA	0.29028	0.031989	0.25829	0.912	K2	1.5555
ENSG00000179583.18	CIITA	30	chr16:10923878-10923992	+	APA	0.29925	0.0059472	0.2933	0.937	K3	0.923
ENSG00000179583.18	CIITA	34	chr16:10924984-10932281	+	APA	0.69954	0.99403	-0.29449	0.93	K3	0.923
ENSG00000114737.15	CISH	9	chr3:50606496-50606521	-	APA	0.075868	0.25734	-0.18147	0.919	K2	0.9129
ENSG00000114737.15	CISH	8	chr3:50606522-50608142	-	APA	0.92435	0.74181	0.18254	0.915	K2	0.9129
ENSG00000114859.15	CLCN2	35	chr3:184346398-184346519	-	APA	0.44397	0.1485	0.29547	0.917	K3	1.8024
ENSG00000105472.12	CLEC11A	9	chr19:50725316-50725469	+	APA	0.044355	0.26502	-0.22067	0.912	K2	1.0371
ENSG00000166509.10	CLEC3A	4	chr16:78030447-78030951	+	APA	0.17239	0.058946	0.11344	0.924	K1	0.7771
ENSG00000179335.18	CLK3	34	chr15:74629707-74630116	+	APA	0.17501	0.77602	-0.60102	0.938	K3	1.1914
ENSG00000113240.12	CLK4	46	chr5:178602664-178603167	-	APA	0.21631	0.42391	-0.20761	0.99	K3	1.4451
ENSG00000113240.12	CLK4	43	chr5:178603272-178603588	-	APA	0.1813	0.010255	0.17104	0.989	K3	1.4451
ENSG00000128973.12	CLN6	34	chr15:68206992-68207029	-	APA	0.7743	0.89564	-0.12134	0.996	K3	1.1627
ENSG00000134852.14	CLOCK	33	chr4:55434823-55435021	-	APA	0.33746	0.043335	0.29412	1	K2	1.263
ENSG00000134852.14	CLOCK	32	chr4:55435022-55435594	-	APA	0.016692	0.26655	-0.24986	0.999	K2	1.263
ENSG00000172409.5	CLP1	8	chr11:57661437-57661864	+	APA	0.86887	0.99074	-0.12187	0.989	K2	0.7384
ENSG00000172409.5	CLP1	7	chr11:57660765-57661436	+	APA	0.12821	0.0064115	0.1218	0.985	K2	0.7384
ENSG00000162129.12	CLPB	2	chr11:72434641-72434648	-	aTSS	0.26641	0.097329	0.16908	0.974	K3	1.0549
ENSG00000162129.12	CLPB	3	chr11:72434598-72434640	-	aTSS	0.72179	0.87781	-0.15602	0.934	K3	1.0549
ENSG00000187118.12	CMC1	13	chr3:28319742-28319762	+	APA	0.020719	0.18218	-0.16146	0.954	K3	1.1764
ENSG00000187118.12	CMC1	12	chr3:28319509-28319741	+	APA	0.92623	0.77161	0.15462	0.909	K3	1.1764
ENSG00000184220.11	CMSS1	18	chr3:100178600-100178603	+	APA	0.29978	0.14174	0.15805	0.906	K2	0.9539
ENSG00000184220.11	CMSS1	17	chr3:100178305-100178599	+	APA	0.69632	0.85347	-0.15715	0.903	K2	0.9539
ENSG00000170293.8	CMTM8	2	chr3:32357373-32357546	+	ES	0.74839	0.95102	-0.20263	0.968	K1	0.8484
ENSG00000182973.18	CNOT10	33	chr3:32773872-32773875	+	APA	0.007614	0.19544	-0.18782	0.978	K3	1.6889
ENSG00000257727.5	CNPY2	15	chr12:56310428-56310432	-	APA	0.063392	0.2716	-0.2082	0.988	K1	0.958
ENSG00000257727.5	CNPY2	14	chr12:56310433-56310595	-	APA	0.93713	0.72841	0.20872	0.984	K1	0.958
ENSG00000170037.13	CNTROB	1	chr17:7932155-7932241	+	aTSS	0.5578	0.77231	-0.21451	0.995	K1	0.9994
ENSG00000170037.13	CNTROB	2	chr17:7932242-7932800	+	aTSS	0.44279	0.22637	0.21643	0.995	K1	0.9994
ENSG00000106603.18	COA1	26	chr7:43639247-43639256	-	APA	0.16762	0.01317	0.15445	0.974	K2	0.9725
ENSG00000106603.18	COA1	25	chr7:43639257-43639448	-	APA	0.81189	0.97222	-0.16032	0.967	K2	0.9725
ENSG00000068120.14	COASY	28	chr17:42566038-42566260	+	APA	0.10847	0.0045099	0.10396	0.978	K3	1.8871
ENSG00000068120.14	COASY	7	chr17:42562220-42562355	+	RI	0.68565	0.79565	-0.11001	0.947	K3	1.362
ENSG00000106078.17	COBL	21	chr7:51025232-51025372	-	AA	0.60409	0.84722	-0.24313	0.913	K2	1.361
ENSG00000135775.13	COG2	3	chr1:230642505-230642520	+	aTSS	0.34373	0.032243	0.31149	0.995	K3	1.4722
ENSG00000136152.14	COG3	1	chr13:45464925-45465004	+	aTSS	0.14453	0.02753	0.117	0.905	K1	0.8037
ENSG00000108821.13	COL1A1	48	chr17:50190001-50190108	-	ES	0.77529	0.52576	0.24954	0.906	K4	2.6177
ENSG00000196739.14	COL27A1	69	chr9:114310549-114311528	+	APA	0.10268	0.34643	-0.24375	0.912	K2	0.989
ENSG00000148444.15	COMMD3	4	chr10:22316409-22316414	+	aTSS	0.34253	0.47974	-0.13722	0.973	K3	1.0321
ENSG00000148444.15	COMMD3	5	chr10:22316415-22316419	+	aTSS	0.65535	0.51971	0.13564	0.965	K3	1.0321
ENSG00000166200.14	COPS2	20	chr15:49127350-49127535	-	APA	0.73325	0.83798	-0.10473	0.996	K2	1.1304
ENSG00000166200.14	COPS2	19	chr15:49127536-49128094	-	APA	0.20818	0.099137	0.10904	0.996	K2	1.1304
ENSG00000166200.14	COPS2	1	chr15:49155653-49155661	-	aTSS	0.07061	0.43664	-0.36603	0.989	K2	1.1856
ENSG00000166200.14	COPS2	2	chr15:49155605-49155652	-	aTSS	0.88751	0.54481	0.3427	0.987	K2	1.1856
ENSG00000168090.9	COPS6	8	chr7:100089747-100090238	+	APA	0.66324	0.21542	0.44782	0.944	K1	0.9982
ENSG00000168090.9	COPS6	9	chr7:100090239-100090362	+	APA	0.33121	0.78389	-0.45268	0.938	K1	0.9982
ENSG00000172725.13	CORO1B	1	chr11:67443488-67443512	-	aTSS	0.49391	0.1052	0.38871	0.974	K2	1.4155
ENSG00000172725.13	CORO1B	2	chr11:67443485-67443487	-	aTSS	0.45111	0.73656	-0.28545	0.965	K2	1.4155
ENSG00000103187.7	COTL1	11	chr16:84565602-84566549	-	APA	0.81078	0.99866	-0.18789	1	K2	0.884
ENSG00000103187.7	COTL1	12	chr16:84565594-84565601	-	APA	0.18975	0.0013255	0.18843	0.997	K2	0.884
ENSG00000137449.15	CPEB2	14	chr4:15066153-15066626	+	APA	0.29763	0.13771	0.15992	0.901	K1	0.9456
ENSG00000214078.12	CPNE1	5	chr20:35664760-35664801	-	AD	0.72354	0.52022	0.20332	0.93	K2	1.78
ENSG00000140848.16	CPNE2	29	chr16:57147796-57147964	+	APA	0.32383	0.5127	-0.18887	0.9	K3	1.5019
ENSG00000080819.6	CPOX	2	chr3:98592949-98593610	-	aTSS	0.37999	0.2079	0.17209	0.902	K1	0.9994
ENSG00000080819.6	CPOX	1	chr3:98593611-98593723	-	aTSS	0.61638	0.79118	-0.1748	0.9	K1	0.9994
ENSG00000169372.12	CRADD	1	chr12:93677375-93677398	+	aTSS	0.15471	0.6643	-0.50959	0.985	K1	0.9925
ENSG00000169372.12	CRADD	2	chr12:93677399-93677472	+	aTSS	0.84821	0.33631	0.5119	0.981	K1	0.9925
ENSG00000215908.10	CROCCP2	26	chr1:16618253-16618255	-	APA	0.0089134	0.39656	-0.38764	0.976	K2	1.3598
ENSG00000121671.11	CRY2	17	chr11:45881050-45881233	+	APA	0.11778	0.0016542	0.11613	0.998	K3	1.9728
ENSG00000121671.11	CRY2	3	chr11:45847475-45847705	+	aTSS	0.33726	0.061081	0.27618	0.965	K1	0.9912
ENSG00000121671.11	CRY2	2	chr11:45847406-45847474	+	aTSS	0.6594	0.93813	-0.27873	0.964	K1	0.9912
ENSG00000113712.17	CSNK1A1	20	chr5:149495896-149496053	-	APA	0.55752	0.70518	-0.14766	0.96	K2	1.4033
ENSG00000113712.17	CSNK1A1	19	chr5:149496054-149496587	-	APA	0.32947	0.17482	0.15465	0.953	K2	1.4033
ENSG00000141551.14	CSNK1D	32	chr17:82244491-82244644	-	APA	0.14535	0.043795	0.10156	0.944	K3	2.4267
ENSG00000169118.17	CSNK1G1	6	chr15:64300319-64300467	-	aTSS	0.89124	0.99316	-0.10192	0.953	K2	0.9837
ENSG00000151292.17	CSNK1G3	9	chr5:123557495-123557564	+	ES	0.98474	0.86041	0.12433	0.95	K4	1.3753
ENSG00000121552.3	CSTA	1	chr3:122325244-122325261	+	aTSS	0.17617	0.057314	0.11885	0.912	K1	0.8538
ENSG00000121552.3	CSTA	2	chr3:122325262-122325358	+	aTSS	0.82381	0.94106	-0.11725	0.903	K1	0.8538
ENSG00000101138.11	CSTF1	1	chr20:56392371-56392393	+	aTSS	0.053112	0.32102	-0.26791	0.944	K1	0.9999
ENSG00000101138.11	CSTF1	2	chr20:56392394-56392538	+	aTSS	0.94813	0.68018	0.26795	0.942	K1	0.9999
ENSG00000164733.20	CTSB	23	chr8:11844324-11844354	-	APA	0.10448	0.0036476	0.10083	1	K3	1.324
ENSG00000152404.15	CWF19L2	22	chr11:107326360-107326796	-	APA	0.66717	0.90237	-0.2352	0.936	K2	0.9988
ENSG00000152404.15	CWF19L2	21	chr11:107326797-107327053	-	APA	0.3297	0.097745	0.23196	0.931	K2	0.9988
ENSG00000197021.8	CXorf40B	5	chrX:149937414-149937432	-	AD	0.48454	0.31771	0.16683	0.987	K2	1.1182
ENSG00000154832.14	CXXC1	44	chr18:50282347-50282348	-	APA	0.013174	0.32096	-0.30778	0.97	K3	1.2153
ENSG00000154832.14	CXXC1	43	chr18:50282349-50282532	-	APA	0.42396	0.1477	0.27626	0.901	K3	1.2153
ENSG00000159348.12	CYB5R1	16	chr1:202962550-202962699	-	APA	0.29514	0.088608	0.20653	0.975	K2	1.5745
ENSG00000159348.12	CYB5R1	17	chr1:202961876-202962549	-	APA	0.55332	0.84136	-0.28804	0.916	K2	1.5745
ENSG00000051523.10	CYBA	17	chr16:88643283-88643513	-	APA	0.7815	0.99892	-0.21742	1	K1	0.9383
ENSG00000051523.10	CYBA	16	chr16:88643514-88643571	-	APA	0.21865	0.0010786	0.21758	1	K1	0.9383
ENSG00000055163.19	CYFIP2	54	chr5:157393208-157393223	+	APA	0.40519	0.013886	0.39131	0.973	K3	1.0299
ENSG00000055163.19	CYFIP2	53	chr5:157392833-157393207	+	APA	0.015128	0.48586	-0.47073	0.947	K3	1.0299
ENSG00000187954.12	CYHR1	18	chr8:144453461-144457641	-	aTSS	0.75507	0.97711	-0.22205	0.948	K1	0.9678
ENSG00000187954.12	CYHR1	17	chr8:144457642-144457928	-	aTSS	0.24457	0.022792	0.22178	0.948	K1	0.9678
ENSG00000119004.15	CYP20A1	1	chr2:203238940-203238976	+	aTSS	0.24675	0.034917	0.21183	0.933	K3	1.9067
ENSG00000186104.10	CYP2R1	5	chr11:14891153-14891363	-	AD	0.89852	0.66292	0.2356	0.924	K2	1.4554
ENSG00000105443.14	CYTH2	25	chr19:48479123-48480653	+	APA	0.28976	0.39342	-0.10366	0.94	K2	1.5578
ENSG00000115866.10	DARS	28	chr2:135906677-135906823	-	APA	0.55645	0.6821	-0.12565	0.959	K2	0.9975
ENSG00000115866.10	DARS	26	chr2:135907244-135907259	-	APA	0.44407	0.31795	0.12612	0.944	K2	0.9975
ENSG00000006634.7	DBF4	2	chr7:87876229-87876486	+	aTSS	0.028544	0.17915	-0.1506	0.921	K3	1.246
ENSG00000163257.10	DCAF16	4	chr4:17805107-17805225	-	ES	0.57066	0.78597	-0.21531	0.922	K2	1.8852
ENSG00000115827.13	DCAF17	10	chr2:171457971-171458075	+	ES	0.90746	0.73395	0.17352	0.934	K2	1.7783
ENSG00000132716.18	DCAF8	12	chr1:160240298-160240370	-	APA	0.59162	0.8517	-0.26008	0.988	K2	1.5092
ENSG00000132716.18	DCAF8	13	chr1:160240102-160240297	-	APA	0.17909	0.068058	0.11104	0.973	K2	1.5092
ENSG00000132716.18	DCAF8	14	chr1:160239784-160240101	-	APA	0.2348	0.084335	0.15047	0.971	K2	1.5092
ENSG00000272886.5	DCP1A	12	chr3:53287370-53287660	-	APA	0.005708	0.34261	-0.3369	1	K2	1.0569
ENSG00000272886.5	DCP1A	13	chr3:53287366-53287369	-	APA	0.21066	0.0022998	0.20836	0.959	K2	1.0569
ENSG00000109184.14	DCUN1D4	2	chr4:51843061-51843062	+	aTSS	0.18208	0.65176	-0.46968	0.97	K3	1.0533
ENSG00000109184.14	DCUN1D4	1	chr4:51843000-51843060	+	aTSS	0.80162	0.32361	0.47801	0.949	K3	1.0533
ENSG00000168872.16	DDX19A	4	chr16:70346883-70346904	+	aTSS	0.017363	0.11362	-0.099995	0.969	K3	1.5473
ENSG00000168872.16	DDX19A	2	chr16:70346861-70346870	+	aTSS	0.56117	0.39186	0.1693	0.957	K3	1.5473
ENSG00000064703.11	DDX20	21	chr1:111765831-111767574	+	APA	0.59246	0.86293	-0.27047	0.999	K2	1.1215
ENSG00000064703.11	DDX20	20	chr1:111765737-111765830	+	APA	0.38086	0.076853	0.30401	0.999	K2	1.1215
ENSG00000089737.16	DDX24	19	chr14:94050938-94051187	-	APA	0.1262	0.27187	-0.14567	0.99	K3	1.6108
ENSG00000089737.16	DDX24	20	chr14:94050923-94050937	-	APA	0.5068	0.39965	0.10715	0.921	K3	1.6108
ENSG00000213782.7	DDX47	25	chr12:12829423-12829979	+	APA	0.45649	0.99168	-0.53519	0.91	K1	0.9043
ENSG00000111364.15	DDX55	1	chr12:123602077-123602098	+	aTSS	0.13299	0.50177	-0.36878	0.949	K2	0.9767
ENSG00000111364.15	DDX55	2	chr12:123602099-123602142	+	aTSS	0.80638	0.49493	0.31146	0.907	K2	0.9767
ENSG00000140995.16	DEF8	19	chr16:89959364-89959366	+	APA	0.017324	0.37417	-0.35684	0.955	K1	0.9901
ENSG00000140995.16	DEF8	18	chr16:89959156-89959363	+	APA	0.98247	0.62535	0.35712	0.955	K1	0.9901
ENSG00000119522.16	DENND1A	6	chr9:123769514-123769563	-	ES	0.80629	0.95858	-0.15229	0.983	K1	0.744
ENSG00000184014.7	DENND5A	34	chr11:9139504-9139854	-	APA	0.56627	0.44371	0.12256	0.903	K2	1.5731
ENSG00000169598.15	DFFB	3	chr1:3857460-3857472	+	aTSS	0.19747	0.75062	-0.55315	0.947	K3	1.3508
ENSG00000070413.19	DGCR2	16	chr22:19036282-19036285	-	APA	0.10547	0.4612	-0.35573	1	K1	1
ENSG00000070413.19	DGCR2	15	chr22:19036286-19039121	-	APA	0.89484	0.53888	0.35596	1	K1	1
ENSG00000117682.16	DHDDS	28	chr1:26469374-26469439	+	APA	0.25322	0.38314	-0.12992	0.902	K2	1.3562
ENSG00000095059.15	DHPS	21	chr19:12675762-12675933	-	APA	0.019522	0.18102	-0.1615	0.972	K2	0.9978
ENSG00000157326.18	DHRS4	3	chr14:23953779-23953788	+	aTSS	0.31903	0.5816	-0.26257	0.954	K2	1.1031
ENSG00000157326.18	DHRS4	2	chr14:23953770-23953778	+	aTSS	0.66792	0.403	0.26492	0.943	K2	1.1031
ENSG00000067248.9	DHX29	30	chr5:55256245-55256248	-	APA	0.01501	0.82471	-0.8097	1	K1	0.7481
ENSG00000067248.9	DHX29	2	chr5:55307387-55307694	-	aTSS	0.016163	0.22895	-0.21278	1	K1	0.8098
ENSG00000067248.9	DHX29	29	chr5:55256249-55256540	-	APA	0.98514	0.17427	0.81087	1	K1	0.7481
ENSG00000067248.9	DHX29	1	chr5:55307695-55307722	-	aTSS	0.98327	0.77201	0.21126	0.999	K1	0.8098
ENSG00000005100.12	DHX33	18	chr17:5443489-5443492	-	APA	0.036155	0.19207	-0.15591	0.932	K2	1.0649
ENSG00000150990.7	DHX37	33	chr12:124947601-124947887	-	APA	0.15058	0.32198	-0.1714	0.901	K2	1.7374
ENSG00000160305.17	DIP2A	56	chr21:46567370-46569708	+	APA	0.96456	0.83311	0.13145	1	K1	0.7169
ENSG00000160305.17	DIP2A	57	chr21:46569709-46569852	+	APA	0.035674	0.16706	-0.13138	0.999	K1	0.7169
ENSG00000150764.13	DIXDC1	27	chr11:112021056-112021979	+	APA	0.07732	0.20549	-0.12817	0.913	K2	1.7559
ENSG00000132535.18	DLG4	4	chr17:7217189-7217339	-	aTSS	0.063953	0.86443	-0.80047	1	K1	0.4172
ENSG00000132535.18	DLG4	5	chr17:7217118-7217188	-	aTSS	0.9371	0.13632	0.80079	1	K1	0.4172
ENSG00000064195.7	DLX3	5	chr17:49990005-49991334	-	APA	0.80617	0.99087	-0.1847	0.948	K1	0.9806
ENSG00000064195.7	DLX3	4	chr17:49991335-49991864	-	APA	0.19382	0.0090212	0.1848	0.935	K1	0.9806
ENSG00000161249.20	DMKN	38	chr19:35503306-35503330	-	APA	0.47004	0.11597	0.35407	0.986	K2	1.1847
ENSG00000161249.20	DMKN	39	chr19:35503304-35503305	-	APA	0.014888	0.25972	-0.24483	0.963	K2	1.1847
ENSG00000161249.20	DMKN	20	chr19:35510253-35510370	-	RI	0.41577	0.53497	-0.11921	0.946	K2	1.6197
ENSG00000185842.15	DNAH14	1	chr1:224929667-224929681	+	aTSS	0.51508	0.12224	0.39284	0.982	K1	0.9838
ENSG00000185842.15	DNAH14	2	chr1:224929682-224929835	+	aTSS	0.48366	0.87471	-0.39105	0.973	K1	0.9838
ENSG00000103423.13	DNAJA3	20	chr16:4456773-4456775	+	APA	0.016133	0.17127	-0.15514	0.924	K2	1.5573
ENSG00000140403.12	DNAJA4	17	chr15:78280685-78282192	+	APA	0.7129	0.81266	-0.099995	0.949	K2	1.3495
ENSG00000205981.6	DNAJC19	21	chr3:180984275-180984277	-	APA	0.012774	0.43608	-0.4233	0.956	K2	1.3154
ENSG00000205981.6	DNAJC19	16	chr3:180986943-180986997	-	AD	0.65217	0.76994	-0.11777	0.927	K4	1.997
ENSG00000205981.6	DNAJC19	3	chr3:180989764-180989769	-	aTSS	0.40308	0.2736	0.12948	0.906	K3	1.6198
ENSG00000115137.11	DNAJC27	12	chr2:24947359-24947748	-	APA	0.033197	0.20791	-0.17471	0.967	K1	0.9253
ENSG00000115137.11	DNAJC27	13	chr2:24943636-24947358	-	APA	0.96685	0.79103	0.17582	0.956	K1	0.9253
ENSG00000100246.12	DNAL4	7	chr22:38778853-38779613	-	APA	0.0241	0.12307	-0.099995	0.905	K1	0.7106
ENSG00000100246.12	DNAL4	8	chr22:38778508-38778852	-	APA	0.97577	0.87697	0.1	0.903	K1	0.7106
ENSG00000213918.10	DNASE1	2	chr16:3651837-3654666	+	aTSS	0.22705	0.43711	-0.21006	0.967	K1	0.9942
ENSG00000213918.10	DNASE1	3	chr16:3654667-3654960	+	aTSS	0.77332	0.56355	0.20977	0.962	K1	0.9942
ENSG00000087470.17	DNM1L	2	chr12:32679287-32679289	+	aTSS	0.053036	0.36583	-0.3128	0.954	K3	1.8653
ENSG00000088305.18	DNMT3B	29	chr20:32808281-32809356	+	APA	0.83607	0.70746	0.12862	0.926	K2	1.2175
ENSG00000150760.12	DOCK1	55	chr10:127451466-127452517	+	APA	0.42583	0.78023	-0.35441	0.94	K1	0.9992
ENSG00000150760.12	DOCK1	54	chr10:127451332-127451465	+	APA	0.57476	0.21941	0.35534	0.937	K1	0.9992
ENSG00000107099.15	DOCK8	68	chr9:464527-465241	+	APA	0.043031	0.61273	-0.56969	0.977	K2	0.959
ENSG00000107099.15	DOCK8	69	chr9:465242-465255	+	APA	0.95427	0.37297	0.5813	0.974	K2	0.959
ENSG00000108963.17	DPH1	30	chr17:2043025-2043424	+	APA	0.5273	0.75216	-0.22486	1	K3	1.6954
ENSG00000108963.17	DPH1	26	chr17:2042605-2042690	+	APA	0.17106	0.0098391	0.16122	0.969	K3	1.6954
ENSG00000154813.9	DPH3	7	chr3:16260424-16260829	-	APA	0.63029	0.52747	0.10282	0.983	K2	1.7894
ENSG00000175550.7	DRAP1	13	chr11:65921451-65921525	+	APA	0.24951	0.080481	0.16903	0.996	K3	1.8523
ENSG00000108591.9	DRG2	29	chr17:18107154-18107941	+	APA	0.9742	0.71381	0.2604	0.978	K2	1.2863
ENSG00000108591.9	DRG2	30	chr17:18107942-18107969	+	APA	0.02268	0.24749	-0.22481	0.975	K2	1.2863
ENSG00000157538.13	DSCR3	2	chr21:37267404-37267532	-	aTSS	0.24614	0.077969	0.16817	0.928	K3	1.9348
ENSG00000047579.19	DTNBP1	2	chr6:15663008-15663042	-	aTSS	0.31386	0.78686	-0.473	0.96	K3	1.273
ENSG00000047579.19	DTNBP1	1	chr6:15663043-15663058	-	aTSS	0.63592	0.18648	0.44945	0.912	K3	1.273
ENSG00000091073.19	DTX2	5	chr7:76461716-76461716	+	aTSS	0.41194	0.022839	0.3891	0.982	K3	2.3866
ENSG00000091073.19	DTX2	6	chr7:76461717-76461726	+	aTSS	0.14133	0.66055	-0.51922	0.972	K3	2.3866
ENSG00000091073.19	DTX2	19	chr7:76482616-76482659	+	APA	0.96871	0.72215	0.24655	0.97	K1	0.9988
ENSG00000091073.19	DTX2	18	chr7:76482508-76482615	+	APA	0.030734	0.28114	-0.25041	0.963	K1	0.9988
ENSG00000091073.19	DTX2	4	chr7:76461709-76461715	+	aTSS	0.18768	0.023334	0.16435	0.957	K3	2.3866
ENSG00000091073.19	DTX2	7	chr7:76461727-76461836	+	aTSS	0.056551	0.20684	-0.15028	0.941	K3	2.3866
ENSG00000169718.17	DUS1L	32	chr17:82057872-82057879	-	APA	0.1381	0.30333	-0.16523	0.931	K3	1.0639
ENSG00000139318.7	DUSP6	7	chr12:89347232-89348368	-	APA	0.40758	0.13693	0.27065	0.965	K2	0.9929
ENSG00000139318.7	DUSP6	6	chr12:89348369-89349071	-	APA	0.59011	0.86501	-0.2749	0.961	K2	0.9929
ENSG00000004975.11	DVL2	1	chr17:7234319-7234545	-	aTSS	0.40425	0.066666	0.33758	0.983	K2	1.5414
ENSG00000004975.11	DVL2	3	chr17:7234069-7234223	-	aTSS	0.27486	0.43607	-0.1612	0.94	K2	1.5414
ENSG00000169016.16	E2F6	9	chr2:11457179-11457233	-	ES	0.7526	0.62355	0.12905	0.906	K4	2.0879
ENSG00000103356.15	EARS2	27	chr16:23522014-23522016	-	APA	0.01448	0.35062	-0.33614	0.958	K3	1.5766
ENSG00000103356.15	EARS2	26	chr16:23522017-23522623	-	APA	0.55126	0.16036	0.3909	0.913	K3	1.5766
ENSG00000281649.1	EBLN3P	7	chr9:37086668-37086874	+	APA	0.14041	0.00062741	0.13978	1	K2	1.7432
ENSG00000122882.10	ECD	2	chr10:73168065-73168071	-	aTSS	0.10452	0.32522	-0.2207	0.947	K3	1.7065
ENSG00000093144.18	ECHDC1	16	chr6:127289634-127289779	-	APA	0.024588	0.2002	-0.17562	0.96	K3	1.8846
ENSG00000140025.15	EFCAB11	3	chr14:89954586-89954689	-	aTSS	0.042649	0.30077	-0.25812	0.922	K2	0.9998
ENSG00000138798.11	EGF	30	chr4:110011995-110012266	+	APA	0.38332	0.92982	-0.5465	1	K2	1.5668
ENSG00000138798.11	EGF	29	chr4:110011690-110011994	+	APA	0.40248	0.070242	0.33224	0.994	K2	1.5668
ENSG00000138798.11	EGF	28	chr4:110011502-110011689	+	APA	0.2392	0.037368	0.20184	0.913	K2	1.5668
ENSG00000129521.13	EGLN3	10	chr14:33925399-33925510	-	APA	0.59957	0.72344	-0.12387	0.913	K2	1.372
ENSG00000115504.14	EHBP1	36	chr2:63045410-63045500	+	APA	0.19578	0.04671	0.14907	0.94	K3	1.5305
ENSG00000103966.10	EHD4	2	chr15:41972259-41972552	-	aTSS	0.1797	0.067921	0.11177	0.911	K1	0.6732
ENSG00000103966.10	EHD4	1	chr15:41972553-41972578	-	aTSS	0.82206	0.93196	-0.1099	0.9	K1	0.6732
ENSG00000175376.8	EIF1AD	13	chr11:65998433-65998743	-	APA	0.44182	0.31764	0.12418	0.932	K1	0.9945
ENSG00000175376.8	EIF1AD	14	chr11:65996545-65998432	-	APA	0.55796	0.68257	-0.12461	0.924	K1	0.9945
ENSG00000175390.13	EIF3F	26	chr11:7995945-7996018	+	APA	0.68254	0.78694	-0.10439	0.902	K2	1.4057
ENSG00000163412.12	EIF4E3	5	chr3:71710412-71710484	-	ES	0.78399	0.9592	-0.17521	0.972	K3	1.7834
ENSG00000114867.20	EIF4G1	11	chr3:184315489-184315545	+	ES	0.76891	0.65869	0.11023	0.913	K7	3.3656
ENSG00000110321.16	EIF4G2	2	chr11:10808924-10808929	-	aTSS	0.28513	0.17	0.11513	0.992	K2	1.406
ENSG00000120690.15	ELF1	15	chr13:40932034-40933351	-	APA	0.56125	0.66394	-0.10269	0.97	K2	1.4047
ENSG00000105656.12	ELL	20	chr19:18442665-18444515	-	APA	0.68013	0.41895	0.26118	0.989	K2	1.5842
ENSG00000105656.12	ELL	18	chr19:18444751-18444868	-	APA	0.13307	0.46099	-0.32792	0.988	K2	1.5842
ENSG00000179387.9	ELMOD2	2	chr4:140524218-140524280	+	aTSS	0.33699	0.96098	-0.62399	1	K1	0.9979
ENSG00000179387.9	ELMOD2	1	chr4:140524158-140524217	+	aTSS	0.66037	0.037075	0.62329	1	K1	0.9979
ENSG00000066322.14	ELOVL1	5	chr1:43367486-43367738	-	AF	0.16816	0.26816	-0.1	0.94	K1	0.9026
ENSG00000066629.16	EML1	30	chr14:99939987-99940324	+	APA	0.32537	0.093096	0.23227	0.979	K1	0.9931
ENSG00000066629.16	EML1	31	chr14:99940325-99942060	+	APA	0.6736	0.90684	-0.23324	0.977	K1	0.9931
ENSG00000066629.16	EML1	4	chr14:99850853-99851035	+	ES	0.81568	0.96069	-0.14502	0.957	K2	1.3046
ENSG00000124074.11	ENKD1	7	chr16:67663657-67663820	-	ES	0.93648	0.82525	0.11123	0.9	K4	2.5098
ENSG00000197586.12	ENTPD6	7	chr20:25207079-25207397	+	ES	0.58599	0.70056	-0.11457	0.906	K2	1.8107
ENSG00000088367.21	EPB41L1	28	chr20:36214357-36214359	+	AA	0.37345	0.19648	0.17697	0.953	K4	2.0879
ENSG00000224032.6	EPB41L4A-AS1	7	chr5:112162303-112162324	+	APA	0.29639	0.52749	-0.2311	0.905	K2	1.3031
ENSG00000224032.6	EPB41L4A-AS1	6	chr5:112162151-112162302	+	APA	0.6429	0.40946	0.23345	0.9	K2	1.3031
ENSG00000072134.15	EPN2	29	chr17:19334491-19335174	+	APA	0.3731	0.00214	0.37096	0.993	K2	1.4675
ENSG00000187266.13	EPOR	20	chr19:11377866-11377873	-	APA	0.015423	0.61621	-0.60079	1	K3	1.3799
ENSG00000187266.13	EPOR	19	chr19:11377874-11378255	-	APA	0.60478	0.034052	0.57073	1	K3	1.3799
ENSG00000136628.17	EPRS	1	chr1:220046531-220046658	-	aTSS	0.28406	0.11778	0.16628	0.907	K2	0.9898
ENSG00000136628.17	EPRS	2	chr1:220046452-220046530	-	aTSS	0.70734	0.86376	-0.15642	0.903	K2	0.9898
ENSG00000151491.12	EPS8	1	chr12:15789371-15789576	-	aTSS	0.32181	0.56204	-0.24022	0.928	K1	0.9986
ENSG00000151491.12	EPS8	2	chr12:15789161-15789370	-	aTSS	0.67834	0.43844	0.2399	0.922	K1	0.9986
ENSG00000131037.14	EPS8L1	25	chr19:55083520-55083615	+	RI	0.24566	0.47401	-0.22835	0.911	K1	0.9934
ENSG00000260565.6	ERVK13-1	10	chr16:2661149-2661195	-	APA	0.077321	0.34789	-0.27057	0.934	K2	1.8415
ENSG00000260565.6	ERVK13-1	11	chr16:2660350-2661148	-	APA	0.77067	0.47362	0.29705	0.93	K2	1.8415
ENSG00000139160.13	ETFBKMT	11	chr12:31668968-31673114	+	APA	0.94036	0.63014	0.31022	0.961	K2	1.2711
ENSG00000139160.13	ETFBKMT	8	chr12:31667647-31668075	+	APA	0.057653	0.34996	-0.29231	0.951	K2	1.2711
ENSG00000105755.7	ETHE1	14	chr19:43506792-43506902	-	APA	0.64793	0.33565	0.31228	0.91	K1	0.9829
ENSG00000105755.7	ETHE1	15	chr19:43506719-43506791	-	APA	0.34936	0.66736	-0.318	0.901	K1	0.9829
ENSG00000090989.17	EXOC1	4	chr4:55853798-55853953	+	AD	0.74293	0.56603	0.17691	0.956	K1	0.9964
ENSG00000205436.7	EXOC3L4	15	chr14:103110272-103110547	+	APA	0.57724	0.83	-0.25276	0.908	K1	0.9789
ENSG00000178896.8	EXOSC4	4	chr8:144080242-144080579	+	APA	0.36735	0.47914	-0.11179	0.927	K1	1
ENSG00000178896.8	EXOSC4	5	chr8:144080580-144080647	+	APA	0.63309	0.51923	0.11386	0.907	K1	1
ENSG00000103089.8	FA2H	11	chr16:74713598-74714269	-	APA	0.048667	0.24237	-0.1937	0.988	K1	0.8296
ENSG00000103089.8	FA2H	12	chr16:74712955-74713597	-	APA	0.95194	0.75636	0.19559	0.978	K1	0.8296
ENSG00000162585.16	FAAP20	34	chr1:2184478-2185174	-	APA	0.24759	0.80463	-0.55704	0.935	K2	0.9987
ENSG00000162585.16	FAAP20	35	chr1:2184464-2184477	-	APA	0.75413	0.19566	0.55847	0.928	K2	0.9987
ENSG00000134824.13	FADS2	20	chr11:61865958-61867347	+	APA	0.49224	0.69872	-0.20648	0.985	K2	1.0059
ENSG00000134824.13	FADS2	19	chr11:61865638-61865957	+	APA	0.50579	0.30094	0.20485	0.973	K2	1.0059
ENSG00000055147.18	FAM114A2	24	chr5:153992714-153992954	-	APA	0.15456	0.026913	0.12764	0.913	K3	1.8047
ENSG00000112584.13	FAM120B	18	chr6:170405349-170405642	+	APA	0.029766	0.1462	-0.11644	0.936	K3	1.6181
ENSG00000112584.13	FAM120B	16	chr6:170405077-170405078	+	APA	0.55188	0.21783	0.33405	0.929	K3	1.6181
ENSG00000031003.10	FAM13B	3	chr5:138033032-138033085	-	aTSS	0.049798	0.31261	-0.26281	0.987	K2	1.5702
ENSG00000031003.10	FAM13B	4	chr5:138032929-138033031	-	aTSS	0.84695	0.48722	0.35973	0.931	K2	1.5702
ENSG00000152380.9	FAM151B	13	chr5:80542043-80542563	+	APA	0.44441	0.77961	-0.3352	0.988	K1	0.997
ENSG00000152380.9	FAM151B	12	chr5:80541673-80542042	+	APA	0.55807	0.22245	0.33561	0.986	K1	0.997
ENSG00000160767.20	FAM189B	28	chr1:155247205-155247216	-	APA	0.15362	0.023693	0.12992	0.912	K2	1.3109
ENSG00000221909.2	FAM200A	3	chr7:99546801-99548506	-	APA	0.45073	0.21819	0.23255	0.937	K1	0.9893
ENSG00000221909.2	FAM200A	4	chr7:99546308-99546800	-	APA	0.55091	0.78145	-0.23054	0.934	K1	0.9893
ENSG00000157870.14	FAM213B	27	chr1:2589633-2589658	+	APA	0.30999	0.41557	-0.10558	0.941	K3	2.3107
ENSG00000164970.14	FAM219A	10	chr9:34401013-34401119	-	APA	0.46493	0.18033	0.28459	0.926	K2	1.8271
ENSG00000173065.13	FAM222B	16	chr17:28757390-28759240	-	APA	0.20205	0.0376	0.16445	0.926	K3	1.7047
ENSG00000272414.5	FAM47E-STBD1	13	chr4:76310045-76310379	+	APA	0.035212	0.21071	-0.1755	0.933	K2	1.5026
ENSG00000147689.16	FAM83A	10	chr8:123209525-123209762	+	APA	0.037414	0.15789	-0.12048	0.994	K2	1.1717
ENSG00000251669.5	FAM86EP	2	chr4:3955409-3955415	-	aTSS	0.11286	0.53324	-0.42038	0.993	K2	0.9973
ENSG00000251669.5	FAM86EP	4	chr4:3955324-3955363	-	aTSS	0.88322	0.47709	0.40613	0.989	K2	0.9973
ENSG00000251669.5	FAM86EP	14	chr4:3942911-3943273	-	APA	0.4218	0.15004	0.27176	0.919	K2	1.5588
ENSG00000187741.14	FANCA	47	chr16:89758577-89758705	-	ES	0.68814	0.81124	-0.1231	0.908	K2	1.1515
ENSG00000187790.10	FANCM	33	chr14:45199972-45200028	+	APA	0.57294	0.23355	0.33938	0.923	K3	1.6018
ENSG00000203780.10	FANK1	12	chr10:126009222-126009266	+	ES	0.93646	0.69252	0.24394	0.959	K2	1.5614
ENSG00000179115.10	FARSA	1	chr19:12933715-12933715	-	aTSS	0.14953	0.0054276	0.1441	1	K2	1.416
ENSG00000026103.21	FAS	19	chr10:89014451-89014584	+	APA	0.017179	0.26214	-0.24496	0.961	K3	1.7179
ENSG00000146267.11	FAXC	8	chr6:99280735-99281453	-	APA	0.32667	0.94371	-0.61704	1	K2	1.1401
ENSG00000146267.11	FAXC	9	chr6:99280667-99280734	-	APA	0.64811	0.039412	0.6087	1	K2	1.1401
ENSG00000127452.8	FBXL12	17	chr19:9810861-9810895	-	APA	0.16179	0.032679	0.12912	0.975	K3	1.4134
ENSG00000153558.13	FBXL2	31	chr3:33385763-33385862	+	APA	0.36226	0.084933	0.27733	0.915	K3	1.6303
ENSG00000153558.13	FBXL2	32	chr3:33385863-33385948	+	APA	0.21472	0.031831	0.18289	0.904	K3	1.6303
ENSG00000134452.19	FBXO18	3	chr10:5891019-5891116	+	ES	0.051912	0.24058	-0.18866	0.976	K1	0.7547
ENSG00000110429.13	FBXO3	27	chr11:33740956-33740964	-	APA	0.0052752	0.56746	-0.56219	0.901	K3	0.8243
ENSG00000150337.13	FCGR1A	7	chr1:149791237-149791390	+	APA	0.050497	0.48351	-0.43301	0.988	K1	0.9826
ENSG00000150337.13	FCGR1A	8	chr1:149791391-149792518	+	APA	0.94945	0.51635	0.4331	0.984	K1	0.9826
ENSG00000161513.11	FDXR	36	chr17:74862542-74862543	-	APA	0.010618	0.11777	-0.10715	0.998	K3	0.6198
ENSG00000161513.11	FDXR	4	chr17:74872986-74873006	-	aTSS	0.62744	0.21118	0.41625	0.942	K4	1.726
ENSG00000066926.10	FECH	1	chr18:57586702-57586772	-	aTSS	0.019428	0.41764	-0.39821	0.957	K2	1.1793
ENSG00000066926.10	FECH	2	chr18:57586655-57586701	-	aTSS	0.79476	0.46266	0.3321	0.929	K2	1.1793
ENSG00000129682.15	FGF13	13	chrX:138632678-138632702	-	APA	0.038903	0.25277	-0.21386	0.972	K2	0.9306
ENSG00000088832.16	FKBP1A	3	chr20:1393039-1393162	-	aTSS	0.76483	0.64947	0.11536	0.933	K3	1.0095
ENSG00000088832.16	FKBP1A	2	chr20:1393163-1393164	-	aTSS	0.23077	0.3459	-0.11513	0.919	K3	1.0095
ENSG00000119686.9	FLVCR2	8	chr14:75639352-75639462	+	ES	0.79623	0.89955	-0.10332	0.927	K4	1.6232
ENSG00000137942.16	FNBP1L	20	chr1:93552580-93554659	+	APA	0.61155	0.73572	-0.12416	0.913	K1	0.9906
ENSG00000137942.16	FNBP1L	19	chr1:93552409-93552579	+	APA	0.38832	0.26468	0.12364	0.907	K1	0.9906
ENSG00000217128.11	FNIP1	24	chr5:131641714-131644436	-	APA	0.55061	0.74738	-0.19677	0.975	K1	0.9937
ENSG00000217128.11	FNIP1	23	chr5:131644437-131644763	-	APA	0.44949	0.25229	0.1972	0.97	K1	0.9937
ENSG00000141568.20	FOXK2	18	chr17:82602393-82602405	+	APA	0.094782	0.33877	-0.24399	0.971	K2	1.8148
ENSG00000141568.20	FOXK2	17	chr17:82601303-82602392	+	APA	0.63765	0.37757	0.26008	0.969	K2	1.8148
ENSG00000128573.24	FOXP2	44	chr7:114689958-114690100	+	APA	0.46004	0.18914	0.2709	0.904	K3	1.9733
ENSG00000110074.10	FOXRED1	2	chr11:126269135-126269156	+	aTSS	0.07077	0.3319	-0.26113	0.945	K3	1.8753
ENSG00000110074.10	FOXRED1	3	chr11:126269157-126269170	+	aTSS	0.45421	0.16482	0.28939	0.922	K3	1.8753
ENSG00000139926.15	FRMD6	28	chr14:51730460-51730727	+	APA	0.28652	0.17032	0.1162	0.946	K3	1.7972
ENSG00000139926.15	FRMD6	24	chr14:51728770-51728936	+	APA	0.29296	0.172	0.12096	0.939	K3	1.7972
ENSG00000126391.13	FRMD8	1	chr11:65386599-65386620	+	aTSS	0.18573	0.038859	0.14687	0.904	K3	1.9655
ENSG00000075539.14	FRYL	84	chr4:48497567-48498545	-	APA	0.23244	0.477	-0.24456	0.953	K2	1.5505
ENSG00000075539.14	FRYL	83	chr4:48498546-48499253	-	APA	0.45214	0.31453	0.13761	0.928	K2	1.5505
ENSG00000106701.11	FSD1L	22	chr9:105539263-105539351	+	ES	0.88886	0.66368	0.22517	0.938	K2	1.2283
ENSG00000157353.16	FUK	27	chr16:70475416-70475493	+	AD	0.70462	0.9561	-0.25148	0.993	K1	0.9549
ENSG00000157353.16	FUK	26	chr16:70475350-70475415	+	ES	0.70808	0.95018	-0.24211	0.985	K1	0.9549
ENSG00000157353.16	FUK	25	chr16:70474790-70475011	+	ES	0.70742	0.94445	-0.23703	0.982	K1	0.9549
ENSG00000172728.15	FUT10	13	chr8:33372264-33372804	-	APA	0.18017	0.4307	-0.25053	0.928	K2	1.5662
ENSG00000104064.16	GABPB1	19	chr15:50285880-50285893	-	APA	0.63906	0.12234	0.51671	0.962	K1	0.9964
ENSG00000104064.16	GABPB1	18	chr15:50285894-50286067	-	APA	0.36013	0.87735	-0.51722	0.96	K1	0.9964
ENSG00000104064.16	GABPB1	15	chr15:50289666-50289668	-	AA	0.77828	0.61922	0.15906	0.924	K2	1.0923
ENSG00000110328.5	GALNT18	2	chr11:11621359-11621758	-	aTSS	0.79493	0.49602	0.29891	0.962	K1	1
ENSG00000110328.5	GALNT18	1	chr11:11621759-11622005	-	aTSS	0.20507	0.50637	-0.3013	0.96	K1	1
ENSG00000213930.11	GALT	34	chr9:34650584-34650598	+	APA	0.74426	0.056056	0.6882	0.993	K2	1.3779
ENSG00000213930.11	GALT	33	chr9:34650530-34650583	+	APA	0.20125	0.80519	-0.60394	0.956	K2	1.3779
ENSG00000159131.16	GART	7	chr21:33542080-33542114	-	aTSS	0.34345	0.041752	0.3017	0.929	K2	1
ENSG00000159131.16	GART	8	chr21:33542065-33542079	-	aTSS	0.65252	0.9578	-0.30529	0.919	K2	1
ENSG00000234741.7	GAS5	21	chr1:173864955-173865167	-	APA	0.60865	0.99045	-0.3818	0.971	K1	0.9975
ENSG00000234741.7	GAS5	20	chr1:173865168-173865228	-	APA	0.39168	0.0093947	0.38229	0.971	K1	0.9975
ENSG00000141448.8	GATA6	8	chr18:22200656-22200880	+	APA	0.28269	0.56617	-0.28348	0.997	K1	0.9978
ENSG00000141448.8	GATA6	9	chr18:22200881-22202528	+	APA	0.71623	0.43069	0.28553	0.992	K1	0.9978
ENSG00000059691.11	GATB	25	chr4:151670838-151670848	-	APA	0.42247	0.017318	0.40515	0.94	K2	1.2105
ENSG00000117228.9	GBP1	18	chr1:89053362-89053468	-	APA	0.068451	0.26132	-0.19287	0.902	K2	1.5609
ENSG00000023909.9	GCLM	9	chr1:93885205-93887033	-	APA	0.44028	0.54711	-0.10683	0.935	K1	0.9998
ENSG00000023909.9	GCLM	8	chr1:93887034-93889159	-	APA	0.55814	0.45299	0.10516	0.933	K1	0.9998
ENSG00000203879.11	GDI1	2	chrX:154437154-154437188	+	aTSS	0.40276	0.64848	-0.24572	0.969	K2	1.0758
ENSG00000203879.11	GDI1	1	chrX:154436920-154437153	+	aTSS	0.59164	0.34207	0.24958	0.965	K2	1.0758
ENSG00000168621.14	GDNF	10	chr5:37812677-37815650	-	APA	0.46541	0.87216	-0.40676	0.969	K2	1.1871
ENSG00000168621.14	GDNF	8	chr5:37816026-37816135	-	APA	0.41948	0.044256	0.37522	0.949	K2	1.1871
ENSG00000092208.16	GEMIN2	20	chr14:39136747-39136775	+	APA	0.30068	0.18318	0.1175	0.992	K3	0.9521
ENSG00000179409.10	GEMIN4	10	chr17:744623-746630	-	APA	0.72185	0.57415	0.1477	0.9	K2	1.743
ENSG00000134864.10	GGACT	6	chr13:100532514-100532601	-	APA	0.019164	0.39128	-0.37212	1	K2	1.4627
ENSG00000152904.11	GGPS1	8	chr1:235342011-235342596	+	APA	0.18988	0.017064	0.17282	1	K3	1.7665
ENSG00000152904.11	GGPS1	9	chr1:235342597-235343093	+	APA	0.3377	0.55374	-0.21604	0.906	K3	1.7665
ENSG00000162419.12	GMEB1	16	chr1:28714874-28714886	+	APA	0.33921	0.0043297	0.33488	0.955	K2	1.5695
ENSG00000197045.12	GMFB	1	chr14:54489026-54489196	-	aTSS	0.4895	0.15149	0.33801	0.9	K2	1.0592
ENSG00000089639.10	GMIP	26	chr19:19629476-19629842	-	APA	0.87386	0.97237	-0.099995	0.934	K1	0.6937
ENSG00000089639.10	GMIP	25	chr19:19629843-19630336	-	APA	0.12557	0.027707	0.1	0.934	K1	0.6937
ENSG00000173540.12	GMPPB	3	chr3:49723840-49723916	-	aTSS	0.96705	0.77545	0.1916	0.922	K2	1.2224
ENSG00000163281.11	GNPDA2	12	chr4:44706412-44707751	-	APA	0.33545	0.067386	0.26807	0.903	K1	0.9963
ENSG00000144674.16	GOLGA4	43	chr3:37366746-37366749	+	APA	0.44305	0.0033695	0.43968	0.972	K2	1.2464
ENSG00000144674.16	GOLGA4	42	chr3:37366080-37366745	+	APA	0.51724	0.99673	-0.47949	0.956	K2	1.2464
ENSG00000144674.16	GOLGA4	3	chr3:37243247-37243251	+	aTSS	0.29491	0.020096	0.27481	0.92	K3	1.4525
ENSG00000108587.15	GOSR1	24	chr17:30522806-30527592	+	APA	0.27725	0.37505	-0.099995	0.979	K2	1.748
ENSG00000198746.12	GPATCH3	8	chr1:26891057-26891226	-	APA	0.16897	0.013187	0.15579	0.974	K1	0.8701
ENSG00000198746.12	GPATCH3	9	chr1:26890489-26891056	-	APA	0.83076	0.98633	-0.15557	0.968	K1	0.8701
ENSG00000160818.16	GPATCH4	22	chr1:156594487-156595212	-	APA	0.75689	0.87776	-0.12087	0.956	K2	1.1487
ENSG00000115159.15	GPD2	29	chr2:156583274-156583404	+	APA	0.053985	0.18298	-0.12899	1	K3	1.2605
ENSG00000115159.15	GPD2	26	chr2:156583049-156583058	+	APA	0.23619	0.063979	0.17221	0.937	K3	1.2605
ENSG00000117262.18	GPR89A	29	chr1:145670185-145670460	+	APA	0.30513	0.0083825	0.29675	0.949	K3	1.7197
ENSG00000170412.16	GPRC5C	1	chr17:74430913-74431527	+	aTSS	0.36469	0.72691	-0.36222	0.961	K1	0.9926
ENSG00000170412.16	GPRC5C	2	chr17:74431528-74432141	+	aTSS	0.63634	0.27272	0.36363	0.953	K1	0.9926
ENSG00000211445.11	GPX3	1	chr5:151020563-151020588	+	aTSS	0.14212	0.023036	0.11909	0.92	K2	0.83
ENSG00000167468.16	GPX4	21	chr19:1106780-1106788	+	APA	0.16849	0.2766	-0.1081	0.97	K2	0.891
ENSG00000167468.16	GPX4	20	chr19:1106573-1106779	+	APA	0.83152	0.72343	0.1081	0.952	K2	0.891
ENSG00000075240.16	GRAMD4	22	chr22:46679684-46679785	+	APA	0.71	0.90753	-0.19752	0.982	K2	1.1089
ENSG00000075240.16	GRAMD4	21	chr22:46677147-46679683	+	APA	0.25152	0.042905	0.20862	0.98	K2	1.1089
ENSG00000083307.10	GRHL2	3	chr8:101492758-101492789	+	aTSS	0.26258	0.71358	-0.451	0.916	K2	0.9896
ENSG00000083307.10	GRHL2	2	chr8:101492442-101492757	+	aTSS	0.737	0.28506	0.45194	0.904	K2	0.9896
ENSG00000168765.16	GSTM4	2	chr1:109656117-109656117	+	aTSS	0.35127	0.11269	0.23858	0.936	K3	1.5031
ENSG00000100577.18	GSTZ1	8	chr14:77321038-77321093	+	aTSS	0.2064	0.011216	0.19518	0.981	K4	1.9044
ENSG00000100577.18	GSTZ1	2	chr14:77320996-77320998	+	aTSS	0.35112	0.85227	-0.50115	0.954	K4	1.9044
ENSG00000100577.18	GSTZ1	6	chr14:77321025-77321031	+	aTSS	0.34279	0.081795	0.261	0.938	K4	1.9044
ENSG00000130299.16	GTPBP3	25	chr19:17341632-17341664	+	APA	0.25707	0.10236	0.15471	0.914	K3	2.0985
ENSG00000056998.19	GYG2	19	chrX:2881092-2881440	+	APA	0.13358	0.021039	0.11254	0.918	K3	1.6068
ENSG00000104812.14	GYS1	19	chr19:48968125-48968129	-	APA	0.35485	0.11643	0.23842	0.901	K1	0.982
ENSG00000113648.16	H2AFY	36	chr5:135334435-135334855	-	APA	0.35612	0.25275	0.10336	0.988	K3	1.7949
ENSG00000138796.16	HADH	22	chr4:108035106-108035151	+	APA	0.1383	0.27123	-0.13293	0.918	K3	1.7136
ENSG00000138796.16	HADH	21	chr4:108034862-108035105	+	APA	0.70334	0.56513	0.13821	0.918	K3	1.7136
ENSG00000249115.8	HAUS5	25	chr19:35622885-35623557	+	APA	0.0044344	0.13662	-0.13219	0.977	K2	1.3193
ENSG00000112339.14	HBS1L	26	chr6:134965149-134965290	-	APA	0.14864	0.31762	-0.16898	0.913	K3	1.5478
ENSG00000111727.11	HCFC2	17	chr12:104102959-104103407	+	APA	0.2517	0.0061235	0.24558	0.964	K2	1.4715
ENSG00000143630.9	HCN3	5	chr1:155284136-155284538	+	RI	0.55148	0.79114	-0.23967	0.934	K1	0.9999
ENSG00000143630.9	HCN3	13	chr1:155288708-155289007	+	AD	0.58954	0.86234	-0.27279	0.922	K1	0.9991
ENSG00000163517.14	HDAC11	11	chr3:13500713-13500789	+	ES	0.70912	0.54754	0.16158	0.946	K4	2.2499
ENSG00000196591.11	HDAC2	4	chr6:113970879-113971136	-	aTSS	0.046621	0.15691	-0.11029	0.985	K3	0.792
ENSG00000069998.12	HDHD5	16	chr22:17137582-17138357	-	APA	0.61991	0.34559	0.27432	0.996	K2	1.6857
ENSG00000163312.10	HELQ	2	chr4:83455824-83455855	-	aTSS	0.64826	0.97581	-0.32755	0.947	K2	1.3743
ENSG00000163312.10	HELQ	1	chr4:83455856-83455856	-	aTSS	0.30464	0.024158	0.28048	0.906	K2	1.3743
ENSG00000198265.11	HELZ	39	chr17:67077929-67077971	-	APA	0.00077391	0.16344	-0.16266	0.993	K2	1.4077
ENSG00000198265.11	HELZ	40	chr17:67070438-67077928	-	APA	0.40651	0.50442	-0.099995	0.969	K2	1.4077
ENSG00000198265.11	HELZ	38	chr17:67077972-67078586	-	APA	0.59365	0.33204	0.26161	0.925	K2	1.4077
ENSG00000144485.10	HES6	16	chr2:238238276-238238604	-	APA	0.079548	0.34447	-0.26492	0.925	K3	1.7215
ENSG00000169660.15	HEXDC	25	chr17:82442593-82442645	+	APA	0.018493	0.13293	-0.11444	0.928	K2	0.8236
ENSG00000168517.10	HEXIM2	11	chr17:45169381-45170035	+	APA	0.73686	0.53114	0.20571	0.94	K2	1.002
ENSG00000165102.14	HGSNAT	23	chr8:43199388-43199858	+	APA	0.11422	0.0042154	0.11001	0.957	K2	1.4928
ENSG00000137133.10	HINT2	13	chr9:35812974-35813145	-	APA	0.48751	0.13868	0.34883	0.955	K1	0.9864
ENSG00000137133.10	HINT2	14	chr9:35812960-35812973	-	APA	0.51228	0.8629	-0.35062	0.953	K1	0.9864
ENSG00000127946.16	HIP1	37	chr7:75538083-75538224	-	APA	0.30388	0.095987	0.20789	0.957	K2	0.9506
ENSG00000127946.16	HIP1	39	chr7:75533300-75534087	-	APA	0.69711	0.9038	-0.20669	0.952	K2	0.9506
ENSG00000095951.16	HIVEP1	14	chr6:12163283-12164575	+	APA	0.6393	0.47944	0.15987	0.958	K1	0.9999
ENSG00000095951.16	HIVEP1	15	chr6:12164576-12164999	+	APA	0.3595	0.52096	-0.16145	0.954	K1	0.9999
ENSG00000181666.17	HKR1	8	chr19:37334671-37334677	+	aTSS	0.038568	0.39179	-0.35322	0.978	K2	0.9971
ENSG00000181666.17	HKR1	10	chr19:37334712-37334782	+	aTSS	0.8409	0.19265	0.64826	0.963	K2	0.9971
ENSG00000256269.7	HMBS	3	chr11:119084885-119084913	+	aTSS	0.30444	0.020967	0.28347	0.933	K2	1.5746
ENSG00000134709.10	HOOK1	30	chr1:59873008-59876378	+	APA	0.49071	0.65014	-0.15943	0.927	K2	1.2057
ENSG00000095066.11	HOOK2	11	chr19:12774535-12774668	-	APA	0.17819	0.010487	0.1677	1	K2	1.8729
ENSG00000095066.11	HOOK2	14	chr19:12773952-12774077	-	APA	0.27014	0.46181	-0.19167	0.956	K2	1.8729
ENSG00000233429.9	HOTAIRM1	8	chr7:27100140-27100154	+	APA	0.060655	0.29018	-0.22953	0.903	K2	1.8748
ENSG00000253293.4	HOXA10	3	chr7:27171220-27172173	-	APA	0.29639	0.13946	0.15693	0.923	K1	0.9328
ENSG00000253293.4	HOXA10	4	chr7:27170591-27171219	-	APA	0.70454	0.85982	-0.15528	0.917	K1	0.9328
ENSG00000120093.11	HOXB3	20	chr17:48548870-48549811	-	APA	0.76494	0.4077	0.35724	0.93	K3	1.4457
ENSG00000107521.18	HPS1	3	chr10:98446888-98446910	-	aTSS	0.036443	0.36652	-0.33008	0.995	K2	1.305
ENSG00000100099.20	HPS4	25	chr22:26466051-26466104	-	ES	0.41129	0.2154	0.19589	0.931	K3	1.8693
ENSG00000173083.14	HPSE	16	chr4:83295320-83295343	-	APA	0.65847	0.04922	0.60925	1	K2	1.1653
ENSG00000153936.16	HS2ST1	2	chr1:86914674-86915160	+	aTSS	0.015195	0.20612	-0.19093	0.935	K1	0.9712
ENSG00000153936.16	HS2ST1	1	chr1:86914648-86914673	+	aTSS	0.98413	0.79452	0.18961	0.929	K1	0.9712
ENSG00000108786.10	HSD17B1	1	chr17:42549214-42552921	+	aTSS	0.53597	0.01243	0.52354	0.92	K2	1.0743
ENSG00000149084.12	HSD17B12	1	chr11:43680558-43680780	+	aTSS	0.39357	0.063085	0.33049	0.988	K1	0.9924
ENSG00000149084.12	HSD17B12	2	chr11:43680781-43680987	+	aTSS	0.60851	0.93571	-0.3272	0.985	K1	0.9924
ENSG00000025423.11	HSD17B6	10	chr12:56787346-56787790	+	APA	0.70116	0.95578	-0.25463	0.923	K1	0.993
ENSG00000025423.11	HSD17B6	9	chr12:56787125-56787345	+	APA	0.29941	0.043813	0.25559	0.914	K1	0.993
ENSG00000099377.13	HSD3B7	4	chr16:30985653-30985824	+	ES	0.97065	0.83446	0.1362	0.968	K3	1.9351
ENSG00000119471.14	HSDL2	1	chr9:112379937-112380079	+	aTSS	0.84112	0.5886	0.25252	0.941	K2	1.0989
ENSG00000119471.14	HSDL2	2	chr9:112380080-112380103	+	aTSS	0.15812	0.40123	-0.2431	0.939	K2	1.0989
ENSG00000102878.16	HSF4	5	chr16:67164935-67165521	+	RI	0.54788	0.84845	-0.30058	0.966	K1	0.9994
ENSG00000102878.16	HSF4	4	chr16:67164900-67164934	+	aTSS	0.56616	0.25013	0.31603	0.935	K2	1.4687
ENSG00000102878.16	HSF4	14	chr16:67167475-67167599	+	ES	0.95505	0.80816	0.14689	0.913	K3	1.931
ENSG00000115317.11	HTRA2	3	chr2:74530046-74530168	+	aTSS	0.63693	0.29762	0.33931	0.961	K3	1.681
ENSG00000115317.11	HTRA2	1	chr2:74529377-74529989	+	aTSS	0.20527	0.56568	-0.36041	0.91	K3	1.681
ENSG00000138413.13	IDH1	22	chr2:208236232-208236264	-	APA	0.32686	0.4762	-0.14934	0.938	K2	1.4653
ENSG00000138413.13	IDH1	21	chr2:208236265-208236741	-	APA	0.58564	0.28364	0.302	0.926	K2	1.4653
ENSG00000138413.13	IDH1	20	chr2:208236742-208237169	-	APA	0.087371	0.24065	-0.15328	0.925	K2	1.4653
ENSG00000101365.20	IDH3B	3	chr20:2664190-2664209	-	aTSS	0.015882	0.33964	-0.32376	1	K3	1.5849
ENSG00000148057.15	IDNK	11	chr9:83643905-83644130	+	APA	0.62414	0.85506	-0.23092	0.997	K2	1.3502
ENSG00000148057.15	IDNK	10	chr9:83643871-83643904	+	APA	0.33181	0.14609	0.18572	0.989	K2	1.3502
ENSG00000163913.11	IFT122	52	chr3:129520346-129520347	+	APA	0.013575	0.24866	-0.23509	0.925	K3	2.156
ENSG00000109083.13	IFT20	2	chr17:28335470-28335470	-	aTSS	0.29079	0.016641	0.27415	0.958	K3	1.7368
ENSG00000109083.13	IFT20	5	chr17:28335441-28335449	-	aTSS	0.08531	0.23857	-0.15326	0.932	K3	1.7368
ENSG00000068885.14	IFT80	34	chr3:160258185-160258402	-	APA	0.12166	0.32434	-0.20268	0.93	K3	1.5941
ENSG00000122970.15	IFT81	27	chr12:110218044-110218560	+	APA	0.84977	0.63684	0.21292	0.92	K2	0.9949
ENSG00000122970.15	IFT81	28	chr12:110218561-110218775	+	APA	0.14932	0.36397	-0.21465	0.914	K2	0.9949
ENSG00000104365.13	IKBKB	50	chr8:42331133-42331608	+	APA	0.0075166	0.1601	-0.15259	0.982	K4	2.3402
ENSG00000104365.13	IKBKB	54	chr8:42331911-42332450	+	APA	0.32675	0.16081	0.16594	0.912	K4	2.3402
ENSG00000269335.5	IKBKG	20	chrX:154565034-154565046	+	APA	0.37582	0.85167	-0.47585	0.999	K1	0.9759
ENSG00000269335.5	IKBKG	19	chrX:154564319-154565033	+	APA	0.62431	0.14805	0.47626	0.999	K1	0.9759
ENSG00000123411.14	IKZF4	14	chr12:56034571-56035331	+	APA	0.0056616	0.11287	-0.10721	0.955	K3	1.7731
ENSG00000077238.13	IL4R	16	chr16:27360766-27360815	+	ES	0.79418	0.94391	-0.14973	0.922	K1	0.7858
ENSG00000184903.9	IMMP2L	15	chr7:110663051-110663053	-	APA	0.051194	0.39527	-0.34408	0.928	K2	1.4952
ENSG00000141401.11	IMPA2	2	chr18:11981516-11981765	+	aTSS	0.63412	0.29055	0.34357	0.914	K1	0.9993
ENSG00000163362.10	INAVA	12	chr1:200913729-200915735	+	APA	0.7334	0.99488	-0.26148	0.995	K1	0.9872
ENSG00000163362.10	INAVA	11	chr1:200913537-200913728	+	APA	0.26564	0.0051846	0.26046	0.991	K1	0.9872
ENSG00000122641.10	INHBA	7	chr7:41685114-41689515	-	APA	0.64397	0.78216	-0.1382	0.915	K2	0.9995
ENSG00000148153.13	INIP	2	chr9:112718118-112718149	-	aTSS	0.63238	0.84199	-0.20961	0.953	K3	1.2813
ENSG00000148153.13	INIP	3	chr9:112718108-112718117	-	aTSS	0.32457	0.1451	0.17947	0.948	K3	1.2813
ENSG00000040933.15	INPP4A	37	chr2:98587662-98587859	+	APA	0.22267	0.37449	-0.15182	0.903	K2	1.7917
ENSG00000127054.20	INTS11	61	chr1:1311602-1311605	-	APA	0.0079196	0.26995	-0.26203	0.956	K3	1.5124
ENSG00000102786.14	INTS6	30	chr13:51365503-51365845	-	APA	0.45516	0.27954	0.17562	0.93	K3	1.863
ENSG00000102786.14	INTS6	33	chr13:51365199-51365226	-	APA	0.039477	0.23784	-0.19836	0.924	K3	1.863
ENSG00000165359.15	INTS6L	22	chrX:135581565-135582240	+	RI	0.82105	0.9475	-0.12645	0.92	K2	0.6981
ENSG00000164941.13	INTS8	36	chr8:94880118-94880314	+	APA	0.21008	0.030126	0.17995	0.926	K2	1.169
ENSG00000068745.14	IP6K2	27	chr3:48693785-48694050	-	APA	0.53729	0.40592	0.13138	0.963	K3	1.4817
ENSG00000196497.16	IPO4	49	chr14:24180226-24180304	-	APA	0.30399	0.19903	0.10496	0.996	K3	1.7677
ENSG00000269837.1	IPO5P1	1	chr19:23255435-23257939	-	aTSS	0.0092114	0.26754	-0.25833	1	K1	0.9094
ENSG00000269837.1	IPO5P1	2	chr19:23255148-23255434	-	aTSS	0.99081	0.73326	0.25755	1	K1	0.9094
ENSG00000174628.16	IQCK	6	chr16:19718315-19718415	+	aTSS	0.26705	0.028307	0.23875	0.914	K3	0.9965
ENSG00000124313.13	IQSEC2	7	chrX:53279564-53279659	-	ES	0.66129	0.86277	-0.20148	0.923	K2	1.7437
ENSG00000176842.14	IRX5	11	chr16:54934070-54934485	+	APA	0.38487	0.50874	-0.12388	0.937	K2	0.9982
ENSG00000176842.14	IRX5	10	chr16:54933961-54934069	+	APA	0.61416	0.49037	0.12379	0.936	K2	0.9982
ENSG00000136003.15	ISCU	3	chr12:108562606-108562609	+	aTSS	0.38143	0.15075	0.23068	0.94	K3	1.5366
ENSG00000182149.20	IST1	36	chr16:71928340-71929008	+	APA	0.47741	0.37318	0.10422	1	K3	1.9877
ENSG00000005884.17	ITGA3	2	chr17:50056068-50056109	+	aTSS	0.92728	0.56041	0.36686	0.99	K1	0.961
ENSG00000005884.17	ITGA3	3	chr17:50056110-50056437	+	aTSS	0.071497	0.4367	-0.3652	0.988	K1	0.961
ENSG00000132470.13	ITGB4	56	chr17:75757816-75757818	+	APA	0.0039341	0.49793	-0.494	0.942	K2	0.9819
ENSG00000132470.13	ITGB4	55	chr17:75757605-75757815	+	APA	0.98482	0.47914	0.50567	0.941	K2	0.9819
ENSG00000115221.10	ITGB6	26	chr2:160101736-160101834	-	APA	0.014988	0.46293	-0.44794	1	K2	1.5302
ENSG00000115221.10	ITGB6	28	chr2:160099666-160101635	-	APA	0.5037	0.29417	0.20953	0.909	K2	1.5302
ENSG00000150995.18	ITPR1	69	chr3:4846139-4846463	+	APA	0.1169	0.010754	0.10614	0.971	K2	1.264
ENSG00000161999.11	JMJD8	16	chr16:682772-682874	-	APA	0.12035	0.00081321	0.11954	0.967	K3	1.6226
ENSG00000189159.15	JPT1	10	chr17:75135307-75136250	-	APA	0.3083	0.055122	0.25318	0.952	K2	0.9995
ENSG00000189159.15	JPT1	11	chr17:75135286-75135306	-	APA	0.69188	0.94473	-0.25285	0.945	K2	0.9995
ENSG00000206053.12	JPT2	12	chr16:1698977-1699266	+	APA	0.28411	0.11748	0.16663	0.956	K3	1.8945
ENSG00000206053.12	JPT2	13	chr16:1699267-1699269	+	APA	0.043438	0.17714	-0.13371	0.949	K3	1.8945
ENSG00000120071.13	KANSL1	11	chr17:46082441-46082542	-	ES	0.96438	0.86051	0.10387	0.951	K2	0.7286
ENSG00000144445.16	KANSL1L	7	chr2:210153495-210153603	-	aTSS	0.52605	0.82503	-0.29898	0.919	K2	1.3696
ENSG00000134152.10	KATNBL1	2	chr15:34210070-34210079	-	aTSS	0.038169	0.50354	-0.46537	0.997	K2	1.568
ENSG00000134152.10	KATNBL1	3	chr15:34210062-34210069	-	aTSS	0.77176	0.27048	0.50128	0.962	K2	1.568
ENSG00000069424.14	KCNAB2	31	chr1:6098811-6098855	+	APA	0.21471	0.093655	0.12106	0.987	K3	1.4608
ENSG00000182324.6	KCNJ14	5	chr19:48466022-48466980	+	APA	0.33888	0.65159	-0.31271	0.956	K1	0.9786
ENSG00000182324.6	KCNJ14	4	chr19:48464181-48466021	+	APA	0.66077	0.34892	0.31186	0.955	K1	0.9786
ENSG00000104783.11	KCNN4	16	chr19:43766533-43766821	-	APA	0.98837	0.89185	0.1	0.909	K1	0.7643
ENSG00000153885.14	KCTD15	17	chr19:33814244-33815763	+	APA	0.70986	0.83183	-0.12196	0.987	K2	1.1816
ENSG00000104756.15	KCTD9	5	chr8:25446129-25446250	-	ES	0.96224	0.86355	0.1	0.922	K3	1.4224
ENSG00000178202.12	KDELC2	11	chr11:108473075-108474952	-	APA	0.015307	0.12571	-0.1104	0.952	K2	0.8148
ENSG00000178202.12	KDELC2	12	chr11:108472112-108473074	-	APA	0.96321	0.85554	0.10767	0.921	K2	0.8148
ENSG00000006459.10	KDM7A	23	chr7:140090903-140091188	-	APA	0.015237	0.14459	-0.12935	0.962	K2	1.4242
ENSG00000138030.12	KHK	12	chr2:27099970-27100751	+	APA	0.21858	0.021089	0.19749	0.964	K2	0.9718
ENSG00000138030.12	KHK	13	chr2:27100752-27100772	+	APA	0.14458	0.47515	-0.33058	0.936	K2	0.9718
ENSG00000100890.15	KIAA0391	21	chr14:35274066-35277614	+	APA	0.35949	0.53643	-0.17694	0.931	K2	1.7538
ENSG00000135709.12	KIAA0513	18	chr16:85088756-85094220	+	APA	0.85545	0.72075	0.1347	0.955	K2	1.1096
ENSG00000135709.12	KIAA0513	17	chr16:85088276-85088755	+	APA	0.079149	0.22426	-0.14511	0.938	K2	1.1096
ENSG00000100578.14	KIAA0586	41	chr14:58548046-58548054	+	APA	0.37317	0.018465	0.35471	0.952	K3	1.5976
ENSG00000100578.14	KIAA0586	40	chr14:58548024-58548045	+	APA	0.29598	0.68636	-0.39038	0.928	K3	1.5976
ENSG00000122203.14	KIAA1191	22	chr5:176347494-176347808	-	APA	0.17331	0.058692	0.11462	0.922	K2	1.4396
ENSG00000116299.16	KIAA1324	35	chr1:109203106-109203123	+	APA	0.60637	0.45585	0.15052	0.907	K2	1.2993
ENSG00000168116.13	KIAA1586	1	chr6:57046532-57046548	+	aTSS	0.19843	0.71562	-0.51718	0.962	K1	0.9996
ENSG00000168116.13	KIAA1586	2	chr6:57046549-57046776	+	aTSS	0.79873	0.28428	0.51445	0.949	K1	0.9996
ENSG00000162929.13	KIAA1841	10	chr2:61076920-61077158	+	ES	0.77999	0.95024	-0.17025	0.971	K2	1.4754
ENSG00000162929.13	KIAA1841	9	chr2:61073458-61073551	+	ES	0.55792	0.78691	-0.22898	0.917	K2	1.4754
ENSG00000054523.17	KIF1B	27	chr1:10303163-10306757	+	APA	0.33696	0.46176	-0.1248	0.979	K1	0.9999
ENSG00000054523.17	KIF1B	28	chr1:10306758-10308597	+	APA	0.66264	0.5381	0.12453	0.976	K1	0.9999
ENSG00000169926.10	KLF13	4	chr15:31372183-31377899	+	APA	0.98032	0.84691	0.13341	0.952	K1	0.7929
ENSG00000169926.10	KLF13	3	chr15:31372010-31372182	+	APA	0.019731	0.1525	-0.13277	0.934	K1	0.7929
ENSG00000118263.14	KLF7	11	chr2:207081016-207081264	-	APA	0.21077	0.0052469	0.20552	0.982	K2	1.9135
ENSG00000165516.10	KLHDC2	22	chr14:49782830-49782918	+	APA	0.44653	0.59459	-0.14806	0.959	K2	1.1526
ENSG00000165516.10	KLHDC2	23	chr14:49782919-49783115	+	APA	0.52411	0.38032	0.1438	0.947	K2	1.1526
ENSG00000003096.14	KLHL13	16	chrX:117898572-117899395	-	APA	0.030537	0.20966	-0.17912	0.917	K2	1.4755
ENSG00000124743.5	KLHL31	5	chr6:53647901-53651597	-	APA	0.6674	0.96118	-0.29378	0.99	K1	0.9968
ENSG00000124743.5	KLHL31	4	chr6:53651598-53652330	-	APA	0.32921	0.03741	0.2918	0.986	K1	0.9968
ENSG00000109790.16	KLHL5	19	chr4:39122209-39122209	+	APA	0.021081	0.14078	-0.1197	0.973	K2	1.2466
ENSG00000109790.16	KLHL5	18	chr4:39122207-39122208	+	APA	0.068069	0.51229	-0.44422	0.911	K2	1.2466
ENSG00000145332.13	KLHL8	12	chr4:87185251-87185571	-	ES	0.86367	0.73221	0.13147	0.911	K3	1.9503
ENSG00000145332.13	KLHL8	4	chr4:87220526-87220536	-	aTSS	0.34138	0.060316	0.28106	0.91	K2	1.2496
ENSG00000145332.13	KLHL8	20	chr4:87162444-87162521	-	APA	0.044747	0.18017	-0.13542	0.909	K3	2.0813
ENSG00000117009.11	KMO	19	chr1:241592289-241595642	+	APA	0.43564	0.98997	-0.55433	1	K1	0.9984
ENSG00000117009.11	KMO	18	chr1:241591953-241592288	+	APA	0.56312	0.010078	0.55304	1	K1	0.9984
ENSG00000118058.20	KMT2A	19	chr11:118481831-118481987	+	aTSS	0.29677	0.47399	-0.17722	0.965	K1	1
ENSG00000118058.20	KMT2A	20	chr11:118481988-118482092	+	aTSS	0.70242	0.52493	0.17749	0.94	K1	1
ENSG00000272333.5	KMT2B	48	chr19:35738497-35738878	+	APA	0.78439	0.88345	-0.099995	0.912	K1	0.8355
ENSG00000133703.11	KRAS	4	chr12:25250751-25250763	-	AD	0.77728	0.93513	-0.15785	0.914	K1	0.9096
ENSG00000001631.15	KRIT1	36	chr7:92200358-92200372	-	APA	0.4901	0.22075	0.26935	0.919	K3	1.7938
ENSG00000111615.13	KRR1	1	chr12:75511622-75511636	-	aTSS	0.70556	0.57647	0.12909	0.925	K2	1.5977
ENSG00000128422.15	KRT17	3	chr17:41624297-41624575	-	aTSS	0.55122	0.95077	-0.39955	0.965	K2	0.8624
ENSG00000128422.15	KRT17	2	chr17:41624576-41624577	-	aTSS	0.45256	0.047378	0.40519	0.956	K2	0.8624
ENSG00000130702.15	LAMA5	100	chr20:62309059-62309064	-	APA	0.57491	0.82178	-0.24687	0.996	K2	1.0006
ENSG00000130702.15	LAMA5	98	chr20:62309145-62309475	-	APA	0.42482	0.17808	0.24674	0.993	K2	1.0006
ENSG00000134248.13	LAMTOR5	15	chr1:110401257-110401583	-	APA	0.83394	0.99856	-0.16462	1	K2	0.8352
ENSG00000134248.13	LAMTOR5	16	chr1:110401253-110401256	-	APA	0.16636	0.0014437	0.16492	0.998	K2	0.8352
ENSG00000115365.11	LANCL1	6	chr2:210476620-210476646	-	AD	0.94294	0.71906	0.22388	0.984	K2	1.0416
ENSG00000174720.15	LARP7	2	chr4:112637126-112637126	+	aTSS	0.072752	0.90528	-0.83253	1	K2	0.3946
ENSG00000174720.15	LARP7	1	chr4:112636964-112637125	+	aTSS	0.931	0.043653	0.88735	1	K2	0.3946
ENSG00000002834.17	LASP1	19	chr17:38921762-38921769	+	APA	0.6785	0.52669	0.15181	1	K2	1.4839
ENSG00000002834.17	LASP1	18	chr17:38920307-38921761	+	APA	0.080892	0.2862	-0.2053	0.996	K2	1.4839
ENSG00000143815.14	LBR	16	chr1:225401502-225403089	-	APA	0.7412	0.91573	-0.17454	0.917	K1	0.9228
ENSG00000143815.14	LBR	15	chr1:225403090-225403463	-	APA	0.25849	0.084007	0.17448	0.917	K1	0.9228
ENSG00000168806.7	LCMT2	2	chr15:43330398-43330582	-	aTSS	0.72689	0.94874	-0.22184	0.967	K1	0.8947
ENSG00000168806.7	LCMT2	1	chr15:43330583-43330605	-	aTSS	0.27369	0.050955	0.22274	0.966	K1	0.8947
ENSG00000178177.15	LCORL	9	chr4:17841199-17845496	-	APA	0.75372	0.53631	0.21741	0.974	K1	0.9991
ENSG00000178177.15	LCORL	8	chr4:17845497-17845901	-	APA	0.24759	0.4632	-0.21562	0.963	K1	0.9991
ENSG00000118961.14	LDAH	15	chr2:20684412-20684875	-	APA	0.34819	0.11989	0.2283	0.958	K1	0.994
ENSG00000118961.14	LDAH	16	chr2:20684014-20684411	-	APA	0.65416	0.88121	-0.22705	0.953	K1	0.994
ENSG00000130164.13	LDLR	2	chr19:11089463-11089477	+	aTSS	0.83674	0.48332	0.35342	0.928	K2	1.2372
ENSG00000130164.13	LDLR	1	chr19:11089362-11089462	+	aTSS	0.13908	0.49006	-0.35098	0.921	K2	1.2372
ENSG00000168675.18	LDLRAD4	22	chr18:13645713-13645777	+	APA	0.34998	0.077678	0.27231	0.968	K3	2.2746
ENSG00000168675.18	LDLRAD4	21	chr18:13645660-13645712	+	APA	0.013288	0.29537	-0.28208	0.951	K3	2.2746
ENSG00000164406.7	LEAP2	3	chr5:132873666-132873751	+	aTSS	0.87692	0.50211	0.3748	0.977	K2	0.9257
ENSG00000164406.7	LEAP2	2	chr5:132873444-132873665	+	aTSS	0.12261	0.49677	-0.37416	0.965	K2	0.9257
ENSG00000050426.15	LETMD1	42	chr12:51060419-51060421	+	APA	0.0066019	0.21307	-0.20647	0.993	K4	2.2862
ENSG00000050426.15	LETMD1	8	chr12:51048372-51048478	+	AD	0.93886	0.82818	0.11068	0.916	K6	4.3294
ENSG00000050426.15	LETMD1	41	chr12:51060414-51060418	+	APA	0.48235	0.27875	0.2036	0.902	K4	2.2862
ENSG00000106003.12	LFNG	14	chr7:2528428-2528429	+	APA	0.078516	0.7876	-0.70908	1	K1	0.7658
ENSG00000106003.12	LFNG	13	chr7:2527146-2528427	+	APA	0.92136	0.21235	0.709	1	K1	0.7658
ENSG00000131981.15	LGALS3	10	chr14:55145116-55145403	+	APA	0.16892	0.050986	0.11793	0.961	K1	0.7419
ENSG00000131981.15	LGALS3	11	chr14:55145404-55145413	+	APA	0.83102	0.9488	-0.11778	0.95	K1	0.7419
ENSG00000107902.13	LHPP	16	chr10:124613426-124614141	+	APA	0.34842	0.56166	-0.21324	0.915	K2	1.4261
ENSG00000106683.14	LIMK1	23	chr7:74121139-74121301	+	APA	0.002964	0.11181	-0.10885	0.989	K2	1.0022
ENSG00000106683.14	LIMK1	24	chr7:74121302-74121458	+	APA	0.2746	0.08295	0.19165	0.965	K2	1.0022
ENSG00000169756.16	LIMS1	25	chr2:108687239-108687246	+	APA	0.021386	0.27417	-0.25279	0.966	K2	1.9419
ENSG00000169756.16	LIMS1	24	chr2:108684449-108687238	+	APA	0.71812	0.36872	0.3494	0.921	K2	1.9419
ENSG00000248360.7	LINC00504	13	chr4:14470465-14474084	-	APA	0.30409	0.62231	-0.31822	0.99	K1	0.9942
ENSG00000248360.7	LINC00504	12	chr4:14474085-14474563	-	APA	0.69374	0.37524	0.31849	0.982	K1	0.9942
ENSG00000227036.6	LINC00511	6	chr17:72592341-72592804	-	aTSS	0.15021	0.52564	-0.37543	0.957	K1	0.9996
ENSG00000227036.6	LINC00511	7	chr17:72592203-72592340	-	aTSS	0.84992	0.47939	0.37053	0.948	K1	0.9996
ENSG00000263753.6	LINC00667	3	chr18:5238100-5238549	+	aTSS	0.022615	0.7427	-0.72009	1	K2	1.1899
ENSG00000263753.6	LINC00667	2	chr18:5238084-5238099	+	aTSS	0.59242	0.049956	0.54247	1	K2	1.1899
ENSG00000215190.9	LINC00680	14	chr6:57946083-57946546	-	APA	0.99055	0.89366	0.1	0.972	K2	0.6639
ENSG00000215190.9	LINC00680	13	chr6:57946547-57947177	-	APA	0.008893	0.10544	-0.099995	0.967	K2	0.6639
ENSG00000249346.6	LINC01016	8	chr6:33889511-33891701	-	APA	0.46325	0.61825	-0.155	0.926	K2	1.4976
ENSG00000251350.1	LINC02475	5	chr4:44020257-44022063	+	APA	0.78292	0.51809	0.26483	0.919	K1	0.9997
ENSG00000251350.1	LINC02475	4	chr4:44019751-44020256	+	APA	0.21852	0.47987	-0.26135	0.917	K1	0.9997
ENSG00000144182.16	LIPT1	6	chr2:99162076-99162363	+	APA	0.016324	0.20951	-0.19318	0.99	K2	1.0173
ENSG00000139636.15	LMBR1L	1	chr12:49110899-49110900	-	aTSS	0.028352	0.33321	-0.30486	0.948	K3	1.6314
ENSG00000103227.18	LMF1	26	chr16:853643-854499	-	APA	0.17516	0.013175	0.16199	0.963	K2	0.9434
ENSG00000154359.12	LONRF1	7	chr8:12736765-12736797	-	AA	0.47671	0.67064	-0.19393	0.901	K1	0.9998
ENSG00000139679.15	LPAR6	15	chr13:48411139-48411740	-	APA	0.80012	0.59453	0.2056	0.934	K2	1.3785
ENSG00000136141.14	LRCH1	1	chr13:46553168-46553169	+	aTSS	0.03268	0.71299	-0.68031	1	K2	0.944
ENSG00000077454.15	LRCH4	2	chr7:100585881-100586129	-	aTSS	0.3173	0.085921	0.23138	0.948	K1	0.9658
ENSG00000077454.15	LRCH4	1	chr7:100586130-100586153	-	aTSS	0.68124	0.91461	-0.23336	0.939	K1	0.9658
ENSG00000157193.15	LRP8	27	chr1:53246568-53247017	-	APA	0.013891	0.54998	-0.53609	1	K2	1.2137
ENSG00000157193.15	LRP8	28	chr1:53246553-53246567	-	APA	0.56206	0.016583	0.54547	1	K2	1.2137
ENSG00000010626.14	LRRC23	14	chr12:6913891-6914071	+	APA	0.26375	0.056517	0.20723	0.9	K2	0.9753
ENSG00000116212.14	LRRC42	3	chr1:53947788-53947821	+	ES	0.76348	0.45612	0.30736	0.982	K1	0.999
ENSG00000136802.11	LRRC8A	6	chr9:128916096-128918034	+	APA	0.039746	0.57396	-0.53422	0.926	K2	0.8269
ENSG00000093167.17	LRRFIP2	37	chr3:37053721-37053961	-	APA	0.21489	0.0042487	0.21064	0.992	K3	1.8392
ENSG00000128534.7	LSM8	1	chr7:118184032-118184143	+	aTSS	0.29014	0.0094509	0.28069	0.998	K2	1.2057
ENSG00000128534.7	LSM8	2	chr7:118184144-118184155	+	aTSS	0.65635	0.90399	-0.24764	0.955	K2	1.2057
ENSG00000160285.14	LSS	10	chr21:46222630-46222662	-	AD	0.78522	0.90435	-0.11913	0.995	K3	0.9079
ENSG00000227507.2	LTB	9	chr6:31580555-31580623	-	APA	0.92835	0.21388	0.71446	1	K1	0.9139
ENSG00000227507.2	LTB	8	chr6:31580624-31581163	-	APA	0.073753	0.78381	-0.71005	0.998	K1	0.9139
ENSG00000090006.17	LTBP4	35	chr19:40614111-40614143	+	aTSS	0.93066	0.72452	0.20614	0.952	K1	0.8103
ENSG00000090006.17	LTBP4	36	chr19:40614144-40614314	+	aTSS	0.068397	0.27737	-0.20898	0.942	K1	0.8103
ENSG00000007392.16	LUC7L	2	chr16:229451-229451	-	aTSS	0.51183	0.016068	0.49576	0.999	K2	1.379
ENSG00000007392.16	LUC7L	3	chr16:229440-229450	-	aTSS	0.021013	0.31614	-0.29512	0.933	K2	1.379
ENSG00000146963.17	LUC7L2	7	chr7:139374673-139375203	+	aTSS	0.23698	0.025264	0.21172	0.949	K1	0.9846
ENSG00000146963.17	LUC7L2	8	chr7:139375204-139376061	+	aTSS	0.76342	0.9747	-0.21128	0.935	K1	0.9846
ENSG00000150551.10	LYPD1	3	chr2:132669881-132670200	-	aTSS	0.064855	0.9465	-0.88164	1	K1	0
ENSG00000150551.10	LYPD1	2	chr2:132670201-132670205	-	aTSS	0.93266	0.05155	0.88111	1	K1	0
ENSG00000143353.11	LYPLAL1	4	chr1:219173884-219173926	+	aTSS	0.18922	0.39683	-0.2076	0.938	K3	1.6097
ENSG00000099949.18	LZTR1	30	chr22:20997232-20998121	+	APA	0.014814	0.14744	-0.13262	0.93	K2	0.9271
ENSG00000099949.18	LZTR1	31	chr22:20998122-20999032	+	APA	0.97997	0.84848	0.13149	0.906	K2	0.9271
ENSG00000164109.13	MAD2L1	1	chr4:120066859-120067074	-	aTSS	0.15611	0.46664	-0.31052	0.98	K2	1.3497
ENSG00000164109.13	MAD2L1	2	chr4:120066834-120066858	-	aTSS	0.7097	0.46721	0.24249	0.946	K2	1.3497
ENSG00000185022.11	MAFF	8	chr22:38214420-38214750	+	APA	0.024136	0.25111	-0.22697	0.947	K2	1.3792
ENSG00000102316.16	MAGED2	2	chrX:54808371-54808433	+	AF	0.51739	0.39419	0.1232	0.938	K1	0.9967
ENSG00000102158.19	MAGT1	18	chrX:77826364-77826366	-	APA	0.50831	0.16327	0.34504	0.922	K2	0.9162
ENSG00000102158.19	MAGT1	17	chrX:77826367-77827460	-	APA	0.49204	0.83662	-0.34458	0.918	K2	0.9162
ENSG00000161021.12	MAML1	6	chr5:179773895-179773951	+	APA	0.6279	0.14916	0.47874	0.943	K1	0.9989
ENSG00000161021.12	MAML1	7	chr5:179773952-179777286	+	APA	0.37176	0.85059	-0.47883	0.937	K1	0.9989
ENSG00000126934.13	MAP2K2	17	chr19:4090324-4090708	-	APA	0.61405	0.87229	-0.25824	0.96	K1	0.9977
ENSG00000126934.13	MAP2K2	18	chr19:4090321-4090323	-	APA	0.38587	0.12802	0.25786	0.951	K1	0.9977
ENSG00000173327.7	MAP3K11	1	chr11:65614243-65615382	-	aTSS	0.91209	0.69162	0.22047	0.973	K2	1.197
ENSG00000173327.7	MAP3K11	2	chr11:65614237-65614242	-	aTSS	0.042767	0.26387	-0.2211	0.972	K2	1.197
ENSG00000267278.5	MAP3K14-AS1	11	chr17:45268264-45268471	+	APA	0.16661	0.40683	-0.24021	0.937	K2	1.4213
ENSG00000006432.15	MAP3K9	21	chr14:70722526-70729650	-	APA	0.97047	0.84948	0.12099	0.986	K2	0.9956
ENSG00000047849.21	MAP4	32	chr3:47850690-47850695	-	APA	0.13569	0.012547	0.12315	0.989	K2	1.4787
ENSG00000180834.7	MAP6D1	6	chr3:183815876-183817061	-	APA	0.77893	0.97005	-0.19112	0.995	K1	0.8168
ENSG00000180834.7	MAP6D1	5	chr3:183817062-183817385	-	APA	0.22135	0.030308	0.19105	0.995	K1	0.8168
ENSG00000180834.7	MAP6D1	4	chr3:183817386-183817436	-	AA	0.73996	0.94287	-0.20291	0.971	K1	0.8354
ENSG00000109339.20	MAPK10	203	chr4:86016536-86016603	-	APA	0.52488	0.046545	0.47834	1	K6	1.4186
ENSG00000109339.20	MAPK10	202	chr4:86016604-86016617	-	APA	0.34784	0.047506	0.30034	0.941	K6	1.4186
ENSG00000188130.13	MAPK12	13	chr22:50256935-50256964	-	ES	0.91595	0.748	0.16795	0.905	K2	1.6204
ENSG00000102882.11	MAPK3	21	chr16:30114546-30114615	-	APA	0.15933	0.35726	-0.19794	0.977	K3	1.922
ENSG00000102882.11	MAPK3	20	chr16:30114616-30114708	-	APA	0.45415	0.18642	0.26773	0.938	K3	1.922
ENSG00000165406.15	Mar-08	15	chr10:45457511-45458543	-	APA	0.22641	0.067563	0.15885	0.944	K2	1.0728
ENSG00000072518.20	MARK2	3	chr11:63839093-63839560	+	aTSS	0.15613	0.51851	-0.36238	1	K2	1.5268
ENSG00000072518.20	MARK2	2	chr11:63839005-63839092	+	aTSS	0.35542	0.024566	0.33085	0.95	K2	1.5268
ENSG00000007047.14	MARK4	26	chr19:45302374-45303369	+	APA	0.25949	0.090099	0.16939	0.958	K2	0.9805
ENSG00000007047.14	MARK4	27	chr19:45303370-45303693	+	APA	0.74135	0.90748	-0.16613	0.936	K2	0.9805
ENSG00000129071.9	MBD4	3	chr3:129440010-129440029	-	aTSS	0.56892	0.23174	0.33718	1	K3	2.0342
ENSG00000129071.9	MBD4	5	chr3:129439928-129440007	-	aTSS	0.070137	0.27181	-0.20167	0.931	K3	2.0342
ENSG00000166987.14	MBD6	22	chr12:57530144-57530148	+	APA	0.44206	0.022768	0.41929	0.949	K1	0.984
ENSG00000166987.14	MBD6	21	chr12:57529934-57530143	+	APA	0.55802	0.97697	-0.41895	0.933	K1	0.984
ENSG00000139793.18	MBNL2	15	chr13:97392009-97394119	+	APA	0.34204	0.44837	-0.10633	0.911	K2	1.818
ENSG00000076770.14	MBNL3	19	chrX:132379203-132379203	-	APA	0.39972	0.28318	0.11654	0.94	K3	1.5592
ENSG00000078070.12	MCCC1	30	chr3:183015220-183015288	-	APA	0.44026	0.78224	-0.34198	0.99	K2	0.9994
ENSG00000131844.15	MCCC2	2	chr5:71587297-71587329	+	aTSS	0.37864	0.70365	-0.32501	0.924	K2	0.9782
ENSG00000131844.15	MCCC2	1	chr5:71587288-71587296	+	aTSS	0.62224	0.26063	0.36162	0.905	K2	0.9782
ENSG00000153898.12	MCOLN2	19	chr1:84925908-84926425	-	APA	0.204	0.39932	-0.19532	0.966	K2	1.4793
ENSG00000172366.19	MCRIP2	5	chr16:641929-642043	+	aTSS	0.40194	0.93509	-0.53315	0.999	K1	0.9999
ENSG00000172366.19	MCRIP2	4	chr16:641849-641928	+	aTSS	0.60037	0.063498	0.53687	0.999	K1	0.9999
ENSG00000085276.17	MECOM	35	chr3:169083507-169084761	-	APA	0.61547	0.82099	-0.20552	0.901	K3	1.3588
ENSG00000116353.15	MECR	3	chr1:29230731-29230915	-	aTSS	0.2991	0.95276	-0.65366	0.996	K2	0.9975
ENSG00000116353.15	MECR	2	chr1:29230916-29230924	-	aTSS	0.70141	0.04574	0.65567	0.991	K2	0.9975
ENSG00000133398.3	MED10	7	chr5:6372165-6372601	-	APA	0.50991	0.37512	0.13478	0.975	K1	0.9997
ENSG00000133398.3	MED10	8	chr5:6371881-6372164	-	APA	0.48946	0.62477	-0.13531	0.972	K1	0.9997
ENSG00000099917.17	MED15	32	chr22:20586568-20586867	+	APA	0.24605	0.089575	0.15647	0.942	K2	1.0727
ENSG00000099917.17	MED15	33	chr22:20586868-20587617	+	APA	0.72042	0.86986	-0.14944	0.941	K2	1.0727
ENSG00000175221.14	MED16	3	chr19:893086-893193	-	aTSS	0.051514	0.47009	-0.41858	0.992	K2	0.9565
ENSG00000175221.14	MED16	2	chr19:893194-893216	-	aTSS	0.41863	0.043522	0.37511	0.95	K2	0.9565
ENSG00000152944.8	MED21	4	chr12:27028285-27029485	+	APA	0.087929	0.19264	-0.10472	0.969	K2	1.2052
ENSG00000152944.8	MED21	5	chr12:27029486-27029749	+	APA	0.82855	0.7151	0.11345	0.941	K2	1.2052
ENSG00000008838.19	MED24	49	chr17:40019129-40019172	-	APA	0.53698	0.84921	-0.31223	0.977	K3	1.3935
ENSG00000008838.19	MED24	48	chr17:40019173-40019292	-	APA	0.18504	0.043613	0.14143	0.935	K3	1.3935
ENSG00000105085.10	MED26	11	chr19:16574919-16576029	-	APA	0.64384	0.75681	-0.11297	0.902	K2	0.9848
ENSG00000214756.7	METTL12	6	chr11:62665947-62666395	+	RI	0.88767	0.5683	0.31938	0.966	K1	0.9736
ENSG00000165792.17	METTL17	34	chr14:20996812-20997009	+	APA	0.039275	0.94339	-0.90412	1	K2	0.9969
ENSG00000165792.17	METTL17	35	chr14:20997010-20997010	+	APA	0.61324	0.057046	0.5562	1	K2	0.9969
ENSG00000144401.14	METTL21A	15	chr2:207609115-207612103	-	APA	0.40278	0.25478	0.148	0.999	K3	1.7461
ENSG00000144401.14	METTL21A	11	chr2:207612980-207613443	-	APA	0.14056	0.0024841	0.13807	0.911	K3	1.7461
ENSG00000130731.15	METTL26	9	chr16:635612-635774	-	ES	0.60961	0.47552	0.13409	0.99	K5	3.5919
ENSG00000116688.16	MFN2	26	chr1:12011496-12013508	+	APA	0.9895	0.83717	0.15233	0.988	K1	0.845
ENSG00000116688.16	MFN2	27	chr1:12013509-12013514	+	APA	0.01047	0.16261	-0.15214	0.982	K1	0.845
ENSG00000092931.11	MFSD11	27	chr17:76778188-76778572	+	APA	0.439	0.24584	0.19316	0.975	K2	1.4453
ENSG00000092931.11	MFSD11	28	chr17:76778573-76778727	+	APA	0.4631	0.64593	-0.18283	0.951	K2	1.4453
ENSG00000174197.16	MGA	17	chr15:41739906-41740052	+	AA	0.37281	0.58957	-0.21676	0.938	K3	2.2353
ENSG00000197530.12	MIB2	16	chr1:1617078-1617323	+	APA	0.01744	0.3164	-0.29896	0.997	K2	1.5399
ENSG00000197530.12	MIB2	29	chr1:1624991-1625185	+	ES	0.96593	0.86378	0.10215	0.952	K2	0.7871
ENSG00000164877.18	MICALL2	33	chr7:1435101-1435147	-	ES	0.77973	0.91077	-0.13104	0.931	K9	5.4979
ENSG00000204516.9	MICB	3	chr6:31498115-31498263	+	aTSS	0.095351	0.24689	-0.15154	0.9	K1	0.8881
ENSG00000100335.13	MIEF1	22	chr22:39516381-39518132	+	APA	0.36772	0.48319	-0.11547	0.978	K2	1.556
ENSG00000100335.13	MIEF1	20	chr22:39515230-39515708	+	APA	0.23446	0.11362	0.12084	0.904	K2	1.556
ENSG00000143409.15	MINDY1	20	chr1:150997100-150997107	-	APA	0.19005	0.0045301	0.18552	1	K2	0.7835
ENSG00000143409.15	MINDY1	21	chr1:150996835-150997099	-	APA	0.81067	0.97488	-0.16421	0.993	K2	0.7835
ENSG00000143409.15	MINDY1	6	chr1:151006312-151006404	-	aTSS	0.33647	0.67147	-0.33499	0.941	K1	0.9985
ENSG00000143409.15	MINDY1	5	chr1:151006405-151006485	-	aTSS	0.66461	0.32796	0.33665	0.934	K1	0.9985
ENSG00000128923.10	MINDY2	2	chr15:58771286-58771313	+	aTSS	0.90329	0.27912	0.62417	0.904	K2	0.9612
ENSG00000186594.14	MIR22HG	10	chr17:1711971-1712268	-	APA	0.19981	0.38138	-0.18157	0.959	K2	1.5569
ENSG00000186594.14	MIR22HG	11	chr17:1711511-1711970	-	APA	0.75175	0.48772	0.26403	0.956	K2	1.5569
ENSG00000172965.14	MIR4435-2HG	10	chr2:111429322-111429620	-	APA	0.81573	0.55123	0.26449	0.906	K2	1.4315
ENSG00000215386.11	MIR99AHG	10	chr21:16419518-16419741	+	aTSS	0.62834	0.92211	-0.29377	0.907	K1	0.9786
ENSG00000215386.11	MIR99AHG	9	chr21:16419432-16419517	+	aTSS	0.37074	0.077412	0.29332	0.9	K1	0.9786
ENSG00000178053.17	MLF1	20	chr3:158605193-158605392	+	APA	0.15757	0.0092154	0.14835	0.973	K3	1.7695
ENSG00000089693.10	MLF2	17	chr12:6748004-6748547	-	APA	0.43114	0.68209	-0.25095	0.912	K1	0.9918
ENSG00000089693.10	MLF2	18	chr12:6747996-6748003	-	APA	0.56891	0.31805	0.25086	0.906	K1	0.9918
ENSG00000078403.16	MLLT10	12	chr10:21556678-21557025	+	APA	0.24134	0.017828	0.22352	0.988	K2	0.9813
ENSG00000078403.16	MLLT10	13	chr10:21557026-21557182	+	APA	0.7581	0.98225	-0.22415	0.984	K2	0.9813
ENSG00000171843.15	MLLT3	1	chr9:20622441-20622543	-	aTSS	0.47586	0.050252	0.4256	0.993	K1	0.9992
ENSG00000171843.15	MLLT3	2	chr9:20622245-20622440	-	aTSS	0.52187	0.94811	-0.42624	0.992	K1	0.9992
ENSG00000115648.13	MLPH	32	chr2:237553992-237553993	+	APA	0.19755	0.017352	0.18019	0.907	K3	1.607
ENSG00000198598.6	MMP17	19	chr12:131851772-131851783	+	APA	0.34343	0.0055735	0.33786	0.937	K2	1.2482
ENSG00000123342.15	MMP19	21	chr12:55836426-55836969	-	APA	0.23545	0.027987	0.20746	0.97	K2	1.2358
ENSG00000123342.15	MMP19	22	chr12:55835433-55836425	-	APA	0.74754	0.97147	-0.22393	0.961	K2	1.2358
ENSG00000235989.3	MORC2-AS1	4	chr22:30924729-30926550	+	APA	0.60022	0.98963	-0.3894	1	K1	0.9993
ENSG00000235989.3	MORC2-AS1	5	chr22:30926551-30926654	+	APA	0.40005	0.010495	0.38955	1	K1	0.9993
ENSG00000106330.11	MOSPD3	11	chr7:100615152-100615326	+	APA	0.449	0.68768	-0.23868	0.927	K1	0.9989
ENSG00000106330.11	MOSPD3	12	chr7:100615327-100615384	+	APA	0.54617	0.31336	0.23282	0.925	K1	0.9989
ENSG00000129255.15	MPDU1	2	chr17:7583647-7583820	+	aTSS	0.47282	0.72928	-0.25647	0.905	K4	1.901
ENSG00000008382.15	MPND	19	chr19:4360069-4360081	+	APA	0.96329	0.57718	0.38611	0.93	K2	0.9924
ENSG00000008382.15	MPND	20	chr19:4360082-4360086	+	APA	0.037061	0.4202	-0.38314	0.929	K2	0.9924
ENSG00000108852.14	MPP2	27	chr17:43877332-43877376	-	APA	0.019261	0.15862	-0.13936	0.997	K3	1.6041
ENSG00000105926.15	MPP6	17	chr7:24689541-24694193	+	APA	0.29981	0.4104	-0.11059	0.94	K1	0.9922
ENSG00000105926.15	MPP6	16	chr7:24687438-24689540	+	APA	0.69837	0.58972	0.10865	0.915	K1	0.9922
ENSG00000150054.18	MPP7	26	chr10:28050993-28051167	-	APA	0.15238	0.0091528	0.14323	0.996	K2	0.914
ENSG00000154889.16	MPPE1	6	chr18:11908296-11908301	-	aTSS	0.15228	0.019963	0.13232	0.946	K3	1.2604
ENSG00000128309.16	MPST	9	chr22:37029216-37029801	+	APA	0.19423	0.0056348	0.1886	0.984	K2	0.9489
ENSG00000128309.16	MPST	10	chr22:37029802-37029812	+	APA	0.80536	0.99436	-0.18899	0.981	K2	0.9489
ENSG00000158186.12	MRAS	14	chr3:138403132-138403186	+	APA	0.052729	0.36208	-0.30935	0.92	K3	1.4905
ENSG00000171861.10	MRM3	3	chr17:782367-782599	+	aTSS	0.20736	0.448	-0.24063	0.933	K2	1.4626
ENSG00000112651.11	MRPL2	2	chr6:43059435-43059438	-	aTSS	0.0092407	0.1095	-0.10026	1	K3	2.0159
ENSG00000112651.11	MRPL2	4	chr6:43059417-43059421	-	aTSS	0.62933	0.30798	0.32135	1	K3	2.0159
ENSG00000112651.11	MRPL2	3	chr6:43059422-43059434	-	aTSS	0.15255	0.42475	-0.2722	0.974	K3	2.0159
ENSG00000198015.12	MRPL42	16	chr12:93502622-93502661	+	APA	0.0848	0.21678	-0.13198	0.969	K2	0.875
ENSG00000198015.12	MRPL42	15	chr12:93501905-93502621	+	APA	0.90361	0.7689	0.13471	0.958	K2	0.875
ENSG00000055950.16	MRPL43	14	chr10:100986280-100986572	-	APA	0.58708	0.77107	-0.18399	0.941	K2	0.999
ENSG00000055950.16	MRPL43	15	chr10:100986276-100986279	-	APA	0.41187	0.22972	0.18216	0.941	K2	0.999
ENSG00000175581.13	MRPL48	17	chr11:73864296-73864424	+	APA	0.25972	0.13904	0.12068	0.949	K3	1.648
ENSG00000172590.18	MRPL52	6	chr14:22829914-22829920	+	aTSS	0.33421	0.11429	0.21992	0.91	K3	1.5849
ENSG00000181991.15	MRPS11	20	chr15:88478252-88478259	+	APA	0.10176	0.0037533	0.1	0.984	K3	1.7476
ENSG00000204568.11	MRPS18B	1	chr6:30617709-30617842	+	aTSS	0.83726	0.67683	0.16042	0.97	K2	1.0656
ENSG00000204568.11	MRPS18B	2	chr6:30617843-30617851	+	aTSS	0.15633	0.3111	-0.15476	0.963	K2	1.0656
ENSG00000125445.10	MRPS7	15	chr17:75266364-75266373	+	APA	0.035673	0.26132	-0.22565	0.993	K2	1.5487
ENSG00000153944.10	MSI2	27	chr17:57632901-57632905	+	APA	0.0064372	0.4163	-0.40987	0.978	K2	1.3712
ENSG00000122085.16	MTERF4	27	chr2:241087225-241089040	-	APA	0.24651	0.48587	-0.23937	0.992	K3	1.837
ENSG00000143033.17	MTF2	3	chr1:93079310-93079310	+	aTSS	0.069928	0.24392	-0.17399	0.937	K2	0.8844
ENSG00000100714.15	MTHFD1	1	chr14:64388031-64388239	+	aTSS	0.44271	0.32028	0.12243	0.933	K2	1.1632
ENSG00000100714.15	MTHFD1	2	chr14:64388240-64388310	+	aTSS	0.54148	0.65388	-0.1124	0.929	K2	1.1632
ENSG00000163738.18	MTHFD2L	11	chr4:74160089-74160514	+	APA	0.37873	0.16885	0.20988	0.913	K1	0.9929
ENSG00000163719.19	MTMR14	30	chr3:9702217-9702387	+	APA	0.013974	0.17126	-0.15729	0.968	K3	2.0188
ENSG00000104643.9	MTMR9	13	chr8:11322625-11323057	+	APA	0.31613	0.19123	0.1249	0.987	K2	1.5803
ENSG00000135297.15	MTO1	35	chr6:73501051-73501096	+	APA	0.44729	0.25253	0.19476	0.962	K3	1.9882
ENSG00000170873.18	MTSS1	34	chr8:124550976-124552799	-	APA	0.037106	0.27601	-0.23891	1	K3	1.7372
ENSG00000170873.18	MTSS1	35	chr8:124550790-124550975	-	APA	0.62786	0.46786	0.16001	0.991	K3	1.7372
ENSG00000170873.18	MTSS1	33	chr8:124552800-124552812	-	APA	0.33842	0.18453	0.15389	0.922	K3	1.7372
ENSG00000132781.17	MUTYH	14	chr1:45333498-45333561	-	AA	0.81428	0.62616	0.18812	0.966	K6	3.5563
ENSG00000132781.17	MUTYH	13	chr1:45333562-45333564	-	AA	0.31631	0.14551	0.17081	0.918	K6	3.5563
ENSG00000141971.12	MVB12A	1	chr19:17419081-17420046	+	aTSS	0.51086	0.14801	0.36285	0.965	K3	1.4773
ENSG00000179820.15	MYADM	7	chr19:53869690-53869753	+	AA	0.50587	0.68558	-0.17971	0.936	K1	0.9996
ENSG00000185697.16	MYBL1	2	chr8:66612908-66613249	-	aTSS	0.1646	0.41632	-0.25172	0.944	K2	1.2041
ENSG00000185697.16	MYBL1	1	chr8:66613250-66614247	-	aTSS	0.81826	0.55483	0.26343	0.94	K2	1.2041
ENSG00000172936.12	MYD88	2	chr3:38138552-38138650	+	aTSS	0.89643	0.56482	0.33161	0.994	K3	1.5314
ENSG00000085274.15	MYNN	16	chr3:169787503-169787544	+	APA	0.45754	0.10058	0.35696	0.964	K2	1.5997
ENSG00000085274.15	MYNN	15	chr3:169786416-169787502	+	APA	0.23446	0.608	-0.37354	0.931	K2	1.5997
ENSG00000196535.15	MYO18A	57	chr17:29073521-29074480	-	APA	0.19547	0.083424	0.11205	0.937	K3	1.5484
ENSG00000196535.15	MYO18A	55	chr17:29074829-29074914	-	APA	0.60093	0.72023	-0.1193	0.908	K3	1.5484
ENSG00000278259.4	MYO19	3	chr17:36534869-36534896	-	aTSS	0.26209	0.44458	-0.18249	0.911	K3	1.4947
ENSG00000167306.19	MYO5B	41	chr18:49826290-49826623	-	APA	0.15964	0.028094	0.13155	0.982	K2	1.2103
ENSG00000167306.19	MYO5B	42	chr18:49826260-49826289	-	APA	0.71485	0.82892	-0.11407	0.958	K2	1.2103
ENSG00000138119.16	MYOF	1	chr10:93482195-93482317	-	aTSS	0.4536	0.59697	-0.14337	0.995	K1	0.9975
ENSG00000138119.16	MYOF	2	chr10:93482107-93482194	-	aTSS	0.54735	0.40363	0.14372	0.995	K1	0.9975
ENSG00000162601.9	MYSM1	12	chr1:58689038-58689116	-	ES	0.79832	0.53763	0.26069	0.905	K3	1.8545
ENSG00000172766.18	NAA16	29	chr13:41375813-41377030	+	APA	0.85772	0.98853	-0.13082	0.998	K1	0.7582
ENSG00000172766.18	NAA16	28	chr13:41375405-41375812	+	APA	0.14142	0.01126	0.13016	0.992	K1	0.7582
ENSG00000110583.12	NAA40	18	chr11:63954718-63957319	+	APA	0.5937	0.46973	0.12397	0.966	K3	1.0381
ENSG00000110583.12	NAA40	17	chr11:63954676-63954717	+	APA	0.40052	0.52524	-0.12472	0.959	K3	1.0381
ENSG00000196531.10	NACA	32	chr12:56712435-56712439	-	APA	0.031176	0.1377	-0.10653	0.94	K2	1.4224
ENSG00000196531.10	NACA	31	chr12:56712440-56712503	-	APA	0.53096	0.31558	0.21538	0.918	K2	1.4224
ENSG00000152620.12	NADK2	19	chr5:36195144-36195282	-	APA	0.0038252	0.17477	-0.17094	0.993	K3	2.1066
ENSG00000108784.9	NAGLU	11	chr17:42543550-42544449	+	APA	0.94961	0.79558	0.15403	0.935	K1	0.9133
ENSG00000108784.9	NAGLU	10	chr17:42543084-42543549	+	APA	0.050377	0.2043	-0.15392	0.916	K1	0.9133
ENSG00000095380.10	NANS	1	chr9:98056739-98056769	+	aTSS	0.019778	0.18708	-0.16731	0.944	K1	0.9424
ENSG00000095380.10	NANS	2	chr9:98056770-98056940	+	aTSS	0.98051	0.8116	0.16891	0.94	K1	0.9424
ENSG00000205531.12	NAP1L4	26	chr11:2944431-2944436	-	APA	0.13974	0.0013202	0.13842	0.997	K2	0.9419
ENSG00000132780.16	NASP	29	chr1:45618061-45618244	+	APA	0.11662	0.0047206	0.1119	0.985	K3	1.2061
ENSG00000151779.12	NBAS	56	chr2:15178988-15179116	-	ES	0.85322	0.95902	-0.10579	0.946	K1	0.6259
ENSG00000160796.16	NBEAL2	67	chr3:47009219-47009548	+	APA	0.29486	0.018733	0.27612	0.967	K2	1.5453
ENSG00000160796.16	NBEAL2	69	chr3:47009557-47009703	+	APA	0.31169	0.53357	-0.22188	0.932	K2	1.5453
ENSG00000263956.6	NBPF11	9	chr1:148127141-148127288	-	ES	0.81564	0.93733	-0.1217	0.907	K2	1.1862
ENSG00000142794.18	NBPF3	27	chr1:21483413-21483467	+	APA	0.21624	0.014359	0.20188	1	K2	0.8374
ENSG00000142794.18	NBPF3	28	chr1:21483468-21484900	+	APA	0.78483	0.96236	-0.17753	0.985	K2	0.8374
ENSG00000269713.7	NBPF9	9	chr1:149081965-149082174	-	ES	0.46778	0.94793	-0.48015	0.999	K3	1.8754
ENSG00000104490.17	NCALD	17	chr8:101686727-101687894	-	APA	0.92127	0.69568	0.22559	0.925	K2	1.1086
ENSG00000104490.17	NCALD	15	chr8:101688105-101688477	-	APA	0.079917	0.29651	-0.2166	0.919	K2	1.1086
ENSG00000151503.12	NCAPD3	45	chr11:134152847-134153052	-	APA	0.26565	0.11275	0.1529	0.913	K2	0.9452
ENSG00000158092.6	NCK1	3	chr3:136862320-136862353	+	AD	0.42604	0.18117	0.24487	0.947	K1	0.9983
ENSG00000213672.7	NCKIPSD	6	chr3:48682136-48682156	-	AA	0.64019	0.43695	0.20324	0.929	K1	0.9998
ENSG00000125912.10	NCLN	22	chr19:3209571-3209575	+	APA	0.63079	0.35608	0.27472	0.922	K1	0.9902
ENSG00000125912.10	NCLN	21	chr19:3209478-3209570	+	APA	0.37628	0.64202	-0.26574	0.912	K1	0.9902
ENSG00000196498.13	NCOR2	26	chr12:124374413-124374463	-	ES	0.59791	0.43445	0.16345	0.934	K1	0.9998
ENSG00000072864.14	NDE1	15	chr16:15724292-15726353	+	APA	0.8763	0.43035	0.44595	0.964	K1	0.9981
ENSG00000072864.14	NDE1	14	chr16:15724191-15724291	+	APA	0.12307	0.57061	-0.44755	0.963	K1	0.9981
ENSG00000188566.13	NDOR1	3	chr9:137205750-137205777	+	aTSS	0.042701	0.24908	-0.20637	0.901	K2	1.5395
ENSG00000165795.23	NDRG2	67	chr14:21016838-21016850	-	APA	0.24884	0.0072917	0.24155	0.984	K3	2.1041
ENSG00000165795.23	NDRG2	66	chr14:21016851-21017220	-	APA	0.2802	0.67279	-0.39258	0.905	K3	2.1041
ENSG00000103034.14	NDRG4	36	chr16:58511671-58511735	+	APA	0.33236	0.06008	0.27228	0.982	K4	1.8521
ENSG00000004779.9	NDUFAB1	9	chr16:23581002-23581013	-	APA	0.2374	0.10126	0.13613	0.924	K1	0.861
ENSG00000004779.9	NDUFAB1	8	chr16:23581014-23581173	-	APA	0.7626	0.89897	-0.13637	0.915	K1	0.861
ENSG00000137806.8	NDUFAF1	2	chr15:41402443-41402444	-	aTSS	0.25374	0.62843	-0.37469	0.903	K2	0.9956
ENSG00000183648.9	NDUFB1	1	chr14:92121810-92121917	-	aTSS	0.026846	0.23304	-0.2062	0.968	K2	1.097
ENSG00000183648.9	NDUFB1	2	chr14:92121728-92121809	-	aTSS	0.93855	0.73957	0.19898	0.967	K2	1.097
ENSG00000183648.9	NDUFB1	8	chr14:92116126-92116229	-	APA	0.79043	0.9395	-0.14907	0.914	K2	1.108
ENSG00000166136.15	NDUFB8	14	chr10:100523743-100523929	-	APA	0.61354	0.911	-0.29746	0.962	K1	0.9789
ENSG00000166136.15	NDUFB8	15	chr10:100523740-100523742	-	APA	0.38631	0.089412	0.29689	0.962	K1	0.9789
ENSG00000151366.12	NDUFC2	11	chr11:78068304-78068348	-	APA	0.56321	0.15144	0.41177	0.97	K2	0.9932
ENSG00000089818.17	NECAP1	17	chr12:8096042-8097730	+	APA	0.15506	0.0015697	0.15349	0.993	K2	0.9247
ENSG00000089818.17	NECAP1	18	chr12:8097731-8097769	+	APA	0.84386	0.99775	-0.15388	0.982	K2	0.9247
ENSG00000177707.10	NECTIN3	10	chr3:111133661-111133990	+	APA	0.19184	0.47149	-0.27964	0.904	K1	0.9994
ENSG00000137601.16	NEK1	1	chr4:169612628-169612629	-	aTSS	0.57495	0.94349	-0.36853	0.921	K2	1
ENSG00000137601.16	NEK1	2	chr4:169612613-169612627	-	aTSS	0.42622	0.057489	0.36873	0.91	K2	1
ENSG00000119408.16	NEK6	4	chr9:124258251-124258361	+	AF	0.074561	0.36247	-0.28791	0.972	K1	0.9468
ENSG00000166881.9	NEMP1	1	chr12:57078764-57078769	-	aTSS	0.78332	0.28216	0.50116	0.915	K1	0.9857
ENSG00000196712.17	NF1	84	chr17:31374130-31374287	+	APA	0.40322	0.10716	0.29607	0.983	K1	0.9996
ENSG00000196712.17	NF1	85	chr17:31374288-31377677	+	APA	0.59705	0.89241	-0.29537	0.977	K1	0.9996
ENSG00000072736.18	NFATC3	26	chr16:68226350-68226471	+	APA	0.45016	0.56667	-0.11651	0.934	K2	1.7032
ENSG00000162599.15	NFIA	18	chr1:61455303-61455562	+	APA	0.21574	0.0067962	0.20894	0.988	K3	1.9391
ENSG00000141905.18	NFIC	18	chr19:3462901-3462907	+	APA	0.2136	0.10437	0.10923	0.952	K3	2.2927
ENSG00000141905.18	NFIC	16	chr19:3456550-3456635	+	ES	0.64113	0.79768	-0.15655	0.925	K2	1.8094
ENSG00000109320.11	NFKB1	32	chr4:102617099-102617117	+	APA	0.2084	0.0064724	0.20192	0.969	K2	1.4372
ENSG00000104825.16	NFKBIB	11	chr19:38908731-38908886	+	APA	0.21468	0.57617	-0.36149	0.949	K1	0.9527
ENSG00000104825.16	NFKBIB	12	chr19:38908887-38908893	+	APA	0.78502	0.42798	0.35704	0.927	K1	0.9527
ENSG00000204498.10	NFKBIL1	1	chr6:31547581-31547612	+	aTSS	0.25474	0.026546	0.22819	0.989	K2	1.5463
ENSG00000244005.12	NFS1	21	chr20:35669471-35669685	-	APA	0.036971	0.15179	-0.11482	0.926	K2	0.8338
ENSG00000145912.8	NHP2	12	chr5:178149460-178149481	-	APA	0.83493	0.95194	-0.11701	0.922	K1	0.7678
ENSG00000145912.8	NHP2	11	chr5:178149482-178149838	-	APA	0.16468	0.04803	0.11665	0.919	K1	0.7678
ENSG00000001461.16	NIPAL3	4	chr1:24415813-24415904	+	aTSS	0.62887	0.15844	0.47043	0.991	K2	1.2607
ENSG00000001461.16	NIPAL3	3	chr1:24415812-24415812	+	aTSS	0.14748	0.44003	-0.29255	0.917	K2	1.2607
ENSG00000114857.17	NKTR	35	chr3:42637001-42637035	+	APA	0.35163	0.4477	-0.099995	0.903	K3	1.8202
ENSG00000103024.7	NME3	18	chr16:1770649-1770766	-	APA	0.22503	0.11195	0.11308	1	K3	1.9602
ENSG00000153406.13	NMRAL1	17	chr16:4461694-4461694	-	APA	0.016875	0.16314	-0.14626	0.967	K3	1.9598
ENSG00000213225.7	NOC2LP1	3	chr2:130231614-130232106	+	APA	0.53951	0.73507	-0.19556	0.984	K1	0.9999
ENSG00000213225.7	NOC2LP1	2	chr2:130231355-130231613	+	APA	0.46211	0.26485	0.19726	0.98	K1	0.9999
ENSG00000115761.15	NOL10	2	chr2:10689968-10689972	-	aTSS	0.50671	0.031432	0.47527	0.914	K2	0.8057
ENSG00000273899.4	NOL12	2	chr22:37686346-37686359	+	aTSS	0.65162	0.93106	-0.27944	0.975	K2	1.2716
ENSG00000273899.4	NOL12	1	chr22:37686323-37686345	+	aTSS	0.27402	0.040201	0.23382	0.952	K2	1.2716
ENSG00000103512.14	NOMO1	39	chr16:14896146-14896156	+	APA	0.80432	0.98886	-0.18454	0.987	K2	0.8628
ENSG00000103512.14	NOMO1	38	chr16:14895973-14896145	+	APA	0.19581	0.011209	0.1846	0.984	K2	0.8628
ENSG00000048162.20	NOP16	15	chr5:176383981-176384283	-	APA	0.15777	0.27909	-0.12132	0.931	K1	0.9584
ENSG00000048162.20	NOP16	16	chr5:176383946-176383980	-	APA	0.84193	0.72074	0.12119	0.93	K1	0.9584
ENSG00000142546.13	NOSIP	3	chr19:49580515-49580535	-	aTSS	0.98146	0.65797	0.32349	0.973	K2	1
ENSG00000142546.13	NOSIP	2	chr19:49580536-49580555	-	aTSS	0.018591	0.34075	-0.32216	0.968	K2	1
ENSG00000131697.17	NPHP4	22	chr1:5890868-5891028	-	ES	0.78158	0.94994	-0.16836	0.935	K1	0.811
ENSG00000107833.10	NPM3	7	chr10:101781332-101781632	-	APA	0.58543	0.99034	-0.40491	0.965	K1	0.9994
ENSG00000107833.10	NPM3	8	chr10:101781325-101781331	-	APA	0.41763	0.0097507	0.40788	0.951	K1	0.9994
ENSG00000131408.13	NR1H2	8	chr19:50376469-50376472	+	aTSS	0.23485	0.027788	0.20706	0.955	K2	0.9757
ENSG00000177463.15	NR2C2	22	chr3:15043338-15043349	+	APA	0.16209	0.26526	-0.10316	0.971	K2	0.8776
ENSG00000177463.15	NR2C2	23	chr3:15043350-15049273	+	APA	0.83831	0.73449	0.10382	0.962	K2	0.8776
ENSG00000115216.13	NRBP1	23	chr2:27442256-27442259	+	APA	0.0016131	0.12155	-0.11993	0.998	K1	0.7713
ENSG00000115216.13	NRBP1	22	chr2:27441708-27442255	+	APA	0.99837	0.87828	0.12009	0.996	K1	0.7713
ENSG00000134986.13	NREP	12	chr5:111755770-111755830	-	ES	0.95115	0.85103	0.10012	0.936	K2	0.8788
ENSG00000129535.12	NRL	11	chr14:24080877-24080999	-	APA	0.2037	0.49672	-0.29302	0.913	K3	1.5727
ENSG00000137404.14	NRM	6	chr6:30690975-30690976	-	aTSS	0.49019	0.20954	0.28066	0.906	K3	1.4725
ENSG00000109685.17	NSD2	46	chr4:1978915-1978915	+	APA	0.37029	0.16669	0.2036	0.956	K3	2.2094
ENSG00000109685.17	NSD2	44	chr4:1978638-1978902	+	APA	0.0070156	0.13635	-0.12933	0.951	K3	2.2094
ENSG00000147548.16	NSD3	36	chr8:38269697-38275022	-	APA	0.62178	0.79408	-0.1723	0.946	K2	1.3902
ENSG00000147548.16	NSD3	2	chr8:38381847-38382245	-	aTSS	0.553	0.97496	-0.42197	0.937	K2	0.9992
ENSG00000147548.16	NSD3	3	chr8:38381799-38381846	-	aTSS	0.44682	0.024968	0.42186	0.922	K2	0.9992
ENSG00000130305.16	NSUN5	21	chr7:73303230-73303234	-	APA	0.86169	0.16776	0.69393	0.988	K2	1.4024
ENSG00000130305.16	NSUN5	22	chr7:73303225-73303229	-	APA	0.017782	0.25674	-0.23896	0.979	K2	1.4024
ENSG00000106133.17	NSUN5P2	18	chr7:72948485-72948597	-	APA	0.13163	0.015123	0.1165	0.964	K2	0.7476
ENSG00000106133.17	NSUN5P2	21	chr7:72947581-72948292	-	APA	0.86704	0.98491	-0.11788	0.944	K2	0.7476
ENSG00000106133.17	NSUN5P2	8	chr7:72953326-72953430	-	ES	0.85476	0.64063	0.21413	0.94	K3	2.0329
ENSG00000148335.14	NTMT1	9	chr9:129634222-129634306	+	AD	0.77971	0.90541	-0.1257	0.986	K1	0.8436
ENSG00000135778.11	NTPCR	11	chr1:232978652-232978722	+	APA	0.45453	0.098289	0.35624	0.988	K3	1.6165
ENSG00000135778.11	NTPCR	12	chr1:232978723-232978751	+	APA	0.33273	0.61372	-0.28099	0.978	K3	1.6165
ENSG00000112874.9	NUDT12	1	chr5:103562791-103562793	-	aTSS	0.94833	0.15356	0.79477	1	K2	1.5317
ENSG00000112874.9	NUDT12	3	chr5:103562703-103562789	-	aTSS	0.052726	0.63149	-0.57877	0.968	K2	1.5317
ENSG00000133961.19	NUMB	32	chr14:73275218-73275672	-	APA	0.13273	0.23194	-0.099995	0.912	K3	1.6888
ENSG00000126883.16	NUP214	53	chr9:131233702-131233703	+	APA	0.0064952	0.59817	-0.59168	1	K2	1.0094
ENSG00000126883.16	NUP214	52	chr9:131233454-131233701	+	APA	0.62075	0.008611	0.61214	1	K2	1.0094
ENSG00000075188.8	NUP37	17	chr12:102074245-102074467	-	APA	0.72831	0.53149	0.19682	0.968	K2	1.4031
ENSG00000093000.18	NUP50	2	chr22:45163986-45163996	+	aTSS	0.96833	0.81456	0.15377	0.962	K2	0.7985
ENSG00000093000.18	NUP50	1	chr22:45163841-45163985	+	aTSS	0.031679	0.18639	-0.15472	0.94	K2	0.7985
ENSG00000138750.14	NUP54	23	chr4:76115206-76115300	-	APA	0.30076	0.14373	0.15703	0.954	K3	1.8995
ENSG00000138750.14	NUP54	24	chr4:76115087-76115205	-	APA	0.35761	0.47296	-0.11535	0.9	K3	1.8995
ENSG00000225484.6	NUTM2B-AS1	13	chr10:79762710-79766052	-	APA	0.70026	0.26739	0.43287	0.913	K1	0.994
ENSG00000143748.17	NVL	6	chr1:224326391-224326464	-	ES	0.82278	0.70581	0.11697	0.942	K8	2.6855
ENSG00000046651.14	OFD1	30	chrX:13769174-13769311	+	APA	0.71086	0.20061	0.51026	0.952	K2	1.0122
ENSG00000046651.14	OFD1	29	chrX:13769066-13769173	+	APA	0.28889	0.77299	-0.4841	0.945	K2	1.0122
ENSG00000111325.16	OGFOD2	33	chr12:122979083-122979438	+	APA	0.51196	0.16092	0.35104	0.941	K3	2.1229
ENSG00000111325.16	OGFOD2	34	chr12:122979439-122979533	+	APA	0.24288	0.57118	-0.32829	0.924	K3	2.1229
ENSG00000181396.12	OGFOD3	13	chr17:82393218-82393911	-	aTSS	0.18648	0.031843	0.15463	0.949	K1	0.8289
ENSG00000181396.12	OGFOD3	14	chr17:82392646-82393217	-	aTSS	0.81226	0.96875	-0.15649	0.933	K1	0.8289
ENSG00000138430.15	OLA1	18	chr2:174075008-174075009	-	APA	0.0033408	0.38132	-0.37798	0.988	K2	1.3957
ENSG00000138430.15	OLA1	17	chr2:174075010-174075189	-	APA	0.92994	0.41548	0.51446	0.971	K2	1.3957
ENSG00000138430.15	OLA1	16	chr2:174075190-174075527	-	APA	0.064602	0.2008	-0.1362	0.917	K2	1.3957
ENSG00000149716.12	ORAOV1	5	chr11:69675323-69675323	-	aTSS	0.22209	0.010244	0.21184	1	K3	2.1347
ENSG00000149716.12	ORAOV1	7	chr11:69675248-69675311	-	aTSS	0.29886	0.61271	-0.31385	0.997	K3	2.1347
ENSG00000164815.10	ORC5	20	chr7:104126343-104126837	-	APA	0.99331	0.68657	0.30674	0.965	K2	0.9544
ENSG00000172057.9	ORMDL3	10	chr17:39922550-39922685	-	APA	0.39975	0.28518	0.11457	0.922	K2	1.5395
ENSG00000135506.15	OS9	1	chr12:57693955-57694022	+	aTSS	0.24636	0.0029918	0.24336	0.998	K3	1.7985
ENSG00000092094.10	OSGEP	2	chr14:20454569-20455089	-	aTSS	0.024171	0.31992	-0.29575	0.962	K1	0.9958
ENSG00000092094.10	OSGEP	1	chr14:20455090-20455105	-	aTSS	0.97532	0.67841	0.29691	0.956	K1	0.9958
ENSG00000083720.12	OXCT1	23	chr5:41731581-41731738	-	APA	0.22198	0.4593	-0.23732	0.937	K3	1.6974
ENSG00000204237.4	OXLD1	16	chr17:81665141-81665155	-	APA	0.095883	0.35114	-0.25526	0.998	K3	2.1172
ENSG00000204237.4	OXLD1	18	chr17:81665056-81665100	-	APA	0.56003	0.23824	0.3218	0.985	K3	2.1172
ENSG00000175591.11	P2RY2	8	chr11:73235935-73236352	+	APA	0.3859	0.49103	-0.10513	0.999	K2	1.5353
ENSG00000179364.13	PACS2	38	chr14:105394554-105394672	+	APA	0.5338	0.41124	0.12256	0.992	K2	1.5415
ENSG00000100266.18	PACSIN2	16	chr22:42870930-42871469	-	APA	0.1724	0.058901	0.1135	0.971	K2	0.9927
ENSG00000158006.13	PAFAH2	13	chr1:25960770-25962083	-	APA	0.30577	0.16738	0.13839	0.956	K1	0.9171
ENSG00000158006.13	PAFAH2	14	chr1:25959767-25960769	-	APA	0.69505	0.83314	-0.13809	0.95	K1	0.9171
ENSG00000110218.8	PANX1	7	chr11:94180802-94181966	+	APA	0.46734	0.99593	-0.52859	0.901	K1	0.9726
ENSG00000115421.12	PAPOLG	11	chr2:60771519-60771630	+	ES	0.74971	0.93381	-0.1841	0.927	K1	0.8914
ENSG00000160781.15	PAQR6	17	chr1:156244790-156244911	-	AA	0.81746	0.95143	-0.13398	0.907	K3	2.5327
ENSG00000148498.15	PARD3	22	chr10:34337275-34337277	-	AD	0.8446	0.70795	0.13665	0.926	K2	1.2403
ENSG00000227345.8	PARG	6	chr10:49935076-49935142	-	ES	0.92825	0.77154	0.15671	0.966	K2	1.039
ENSG00000059378.12	PARP12	15	chr7:140023749-140024885	-	APA	0.87361	0.99791	-0.12429	1	K1	0.7225
ENSG00000059378.12	PARP12	16	chr7:140023744-140023748	-	APA	0.1268	0.0020187	0.12478	0.998	K1	0.7225
ENSG00000138496.16	PARP9	19	chr3:122528005-122528743	-	APA	0.42935	0.20496	0.2244	0.921	K2	1.6412
ENSG00000185480.11	PARPBP	22	chr12:102196668-102197361	+	APA	0.041707	0.23028	-0.18857	0.974	K2	1.6945
ENSG00000166889.13	PATL1	7	chr11:59655956-59656045	-	ES	0.73103	0.89558	-0.16455	0.983	K1	0.8803
ENSG00000189223.14	PAX8-AS1	13	chr2:113237595-113238089	+	aTSS	0.95043	0.75656	0.19387	0.974	K1	0.8154
ENSG00000189223.14	PAX8-AS1	12	chr2:113237534-113237594	+	aTSS	0.050257	0.2454	-0.19515	0.973	K1	0.8154
ENSG00000159086.14	PAXBP1	30	chr21:32733900-32734819	-	APA	0.46261	0.65854	-0.19592	0.914	K2	1.7526
ENSG00000238197.5	PAXBP1-AS1	1	chr21:32728115-32728138	+	aTSS	0.055549	0.9374	-0.88185	1	K1	0
ENSG00000238197.5	PAXBP1-AS1	2	chr21:32728139-32730661	+	aTSS	0.94606	0.062519	0.88354	1	K1	0
ENSG00000166228.8	PCBD1	7	chr10:70883510-70883931	-	APA	0.64834	0.51037	0.13797	0.993	K1	0.9999
ENSG00000166228.8	PCBD1	6	chr10:70883932-70884048	-	APA	0.35142	0.48965	-0.13823	0.992	K1	0.9999
ENSG00000251664.3	PCDHA12	2	chr5:140875473-140877839	+	aTSS	0.98797	0.80011	0.18786	0.968	K1	0.9737
ENSG00000251664.3	PCDHA12	1	chr5:140875302-140875472	+	aTSS	0.012029	0.20126	-0.18923	0.959	K1	0.9737
ENSG00000255408.3	PCDHA3	1	chr5:140801028-140801197	+	aTSS	0.11754	0.92721	-0.80967	1	K1	0.5125
ENSG00000255408.3	PCDHA3	2	chr5:140801198-140803591	+	aTSS	0.88364	0.071025	0.81262	1	K1	0.5125
ENSG00000165494.11	PCF11	2	chr11:83157127-83157142	+	aTSS	0.83011	0.99425	-0.16414	0.931	K2	0.968
ENSG00000165494.11	PCF11	1	chr11:83156988-83157126	+	aTSS	0.16899	0.0055831	0.16341	0.923	K2	0.968
ENSG00000078674.17	PCM1	59	chr8:18027637-18027747	+	APA	0.31233	0.019828	0.2925	0.999	K3	1.6661
ENSG00000078674.17	PCM1	3	chr8:17922999-17923009	+	aTSS	0.32802	0.016184	0.31183	0.951	K3	1.4247
ENSG00000168300.13	PCMTD1	13	chr8:51820340-51820718	-	APA	0.27051	0.031808	0.2387	1	K2	1.5159
ENSG00000168300.13	PCMTD1	2	chr8:51899025-51899036	-	aTSS	0.32623	0.034811	0.29142	0.935	K2	1.2663
ENSG00000203880.11	PCMTD2	11	chr20:64275654-64276230	+	APA	0.34179	0.45502	-0.11322	1	K2	0.9991
ENSG00000203880.11	PCMTD2	10	chr20:64274843-64275653	+	APA	0.65794	0.54523	0.11272	1	K2	0.9991
ENSG00000126773.12	PCNX4	3	chr14:60107586-60111157	+	AL	0.80056	0.46058	0.33998	0.979	K2	1.3082
ENSG00000161217.11	PCYT1A	19	chr3:196238551-196238790	-	APA	0.45193	0.31255	0.13938	0.981	K2	1.5838
ENSG00000152270.8	PDE3B	3	chr11:14644260-14645053	+	aTSS	0.054707	0.4172	-0.36249	0.987	K2	1.1968
ENSG00000065989.15	PDE4A	25	chr19:10467622-10467649	+	APA	0.16033	0.36694	-0.20662	0.923	K3	1.7149
ENSG00000184588.17	PDE4B	22	chr1:66372739-66373504	+	APA	0.11857	0.40062	-0.28205	0.971	K3	1.7433
ENSG00000184588.17	PDE4B	21	chr1:66372313-66372738	+	APA	0.29878	0.037028	0.26175	0.921	K3	1.7433
ENSG00000143870.12	PDIA6	21	chr2:10783391-10783392	-	APA	0.26844	0.0099016	0.25854	1	K2	1.2515
ENSG00000143870.12	PDIA6	20	chr2:10783393-10783860	-	APA	0.061264	0.3101	-0.24884	0.993	K2	1.2515
ENSG00000140992.18	PDPK1	23	chr16:2597651-2597920	+	APA	0.0087887	0.12794	-0.11915	0.999	K2	0.7218
ENSG00000090857.13	PDPR	31	chr16:70157235-70158315	+	APA	0.038798	0.20108	-0.16228	0.974	K3	1.4889
ENSG00000133027.17	PEMT	1	chr17:17591701-17591708	-	aTSS	0.81057	0.25201	0.55855	0.94	K1	0.9995
ENSG00000133027.17	PEMT	2	chr17:17591531-17591700	-	aTSS	0.19228	0.74944	-0.55717	0.938	K1	0.9995
ENSG00000127980.15	PEX1	39	chr7:92487290-92487296	-	APA	0.16395	0.29546	-0.13151	0.932	K3	1.1771
ENSG00000127980.15	PEX1	37	chr7:92487457-92487541	-	APA	0.76926	0.65807	0.11118	0.913	K3	1.1771
ENSG00000162735.18	PEX19	2	chr1:160285142-160285146	-	aTSS	0.057439	0.23526	-0.17783	0.952	K2	0.7297
ENSG00000162735.18	PEX19	1	chr1:160285147-160285154	-	aTSS	0.94189	0.7639	0.17799	0.95	K2	0.7297
ENSG00000215193.12	PEX26	3	chr22:18078048-18078295	+	RI	0.72259	0.92999	-0.2074	0.951	K1	0.824
ENSG00000124587.13	PEX6	1	chr6:42979151-42979220	-	aTSS	0.02697	0.50743	-0.48046	0.911	K1	0.993
ENSG00000113068.9	PFDN1	12	chr5:140245125-140245346	-	APA	0.22744	0.053487	0.17395	0.988	K3	1.5033
ENSG00000113068.9	PFDN1	13	chr5:140245087-140245124	-	APA	0.64869	0.82109	-0.1724	0.935	K3	1.5033
ENSG00000123349.13	PFDN5	23	chr12:53299344-53299445	+	APA	0.2278	0.096736	0.13106	0.942	K2	1.5092
ENSG00000123836.14	PFKFB2	23	chr1:207079676-207081024	+	APA	0.49057	0.78386	-0.29329	0.909	K2	1.2213
ENSG00000170525.19	PFKFB3	24	chr10:6233091-6233368	+	APA	0.13269	0.023238	0.10945	0.997	K2	0.8498
ENSG00000070087.13	PFN2	22	chr3:149964935-149965347	-	APA	0.26571	0.42488	-0.15917	0.979	K2	1.0507
ENSG00000070087.13	PFN2	23	chr3:149964913-149964934	-	APA	0.72939	0.56936	0.16004	0.971	K2	1.0507
ENSG00000169299.13	PGM2	3	chr4:37826708-37826718	+	aTSS	0.49582	0.22683	0.26899	0.951	K3	1.3016
ENSG00000169299.13	PGM2	2	chr4:37826660-37826707	+	aTSS	0.4456	0.73479	-0.28918	0.935	K3	1.3016
ENSG00000130517.13	PGPEP1	16	chr19:18364219-18364342	+	APA	0.66459	0.48662	0.17796	0.96	K2	1.4373
ENSG00000130517.13	PGPEP1	14	chr19:18363431-18363998	+	APA	0.33511	0.47073	-0.13562	0.911	K2	1.4373
ENSG00000130517.13	PGPEP1	5	chr19:18340614-18340715	+	aTSS	0.5262	0.32639	0.19981	0.904	K3	1.565
ENSG00000112511.17	PHF1	19	chr6:33415810-33416051	+	APA	0.0417	0.21125	-0.16954	0.959	K2	1.5202
ENSG00000172943.19	PHF8	34	chrX:53938060-53939161	-	RI	0.90418	0.77691	0.12727	0.907	K1	0.8339
ENSG00000054148.17	PHPT1	8	chr9:136850755-136851022	+	APA	0.41015	0.6297	-0.21955	0.984	K1	0.9998
ENSG00000054148.17	PHPT1	9	chr9:136851023-136851027	+	APA	0.58949	0.3703	0.21919	0.983	K1	0.9998
ENSG00000143393.16	PI4KB	1	chr1:151327658-151327715	-	aTSS	0.16173	0.47798	-0.31625	0.973	K2	1.4362
ENSG00000143393.16	PI4KB	2	chr1:151327412-151327657	-	aTSS	0.69086	0.4282	0.26267	0.952	K2	1.4362
ENSG00000131788.15	PIAS3	2	chr1:145859665-145859779	-	aTSS	0.3454	0.17492	0.17049	0.953	K1	0.9777
ENSG00000131788.15	PIAS3	1	chr1:145859780-145859836	-	aTSS	0.65362	0.82349	-0.16987	0.944	K1	0.9777
ENSG00000174227.15	PIGG	34	chr4:532114-533631	+	aTSS	0.0082055	0.1383	-0.13009	0.999	K2	1.2611
ENSG00000142892.14	PIGK	2	chr1:77219427-77219429	-	aTSS	0.033952	0.38787	-0.35392	0.938	K2	0.9917
ENSG00000142892.14	PIGK	1	chr1:77219430-77219430	-	aTSS	0.96574	0.61281	0.35293	0.938	K2	0.9917
ENSG00000108474.16	PIGL	3	chr17:16217220-16217236	+	aTSS	0.26336	0.89266	-0.6293	0.987	K3	0.9977
ENSG00000197563.10	PIGN	39	chr18:62044549-62045341	-	APA	0.22192	0.38859	-0.16667	0.918	K2	1.194
ENSG00000124155.17	PIGT	49	chr20:45426203-45426217	+	APA	0.39885	0.30044	0.1	0.985	K4	1.6669
ENSG00000078142.12	PIK3C3	36	chr18:42081397-42081421	+	APA	0.30945	0.022206	0.28724	0.967	K2	1.3289
ENSG00000100100.12	PIK3IP1	10	chr22:31289315-31289393	-	ES	0.96746	0.82572	0.14174	0.943	K2	1.0585
ENSG00000171033.12	PKIA	6	chr8:78601742-78602098	+	APA	0.010628	0.11002	-0.099995	0.934	K2	1.4715
ENSG00000127564.16	PKMYT1	4	chr16:2980425-2980439	-	aTSS	0.56706	0.34588	0.22119	0.994	K3	2.2624
ENSG00000057294.14	PKP2	25	chr12:32790854-32791942	-	APA	0.57724	0.31249	0.26475	0.969	K2	1.5584
ENSG00000057294.14	PKP2	1	chr12:32896757-32896840	-	aTSS	0.27937	0.62544	-0.34607	0.945	K2	1.5276
ENSG00000123739.10	PLA2G12A	7	chr4:109714262-109714495	-	APA	0.24769	0.14872	0.1	0.994	K2	1.4749
ENSG00000123739.10	PLA2G12A	1	chr4:109729975-109730077	-	aTSS	0.015215	0.17692	-0.16171	0.968	K2	1.5305
ENSG00000166289.5	PLEKHF1	7	chr19:29674844-29675457	+	APA	0.78458	0.97924	-0.19466	0.948	K2	0.9727
ENSG00000090924.14	PLEKHG2	1	chr19:39412585-39413308	+	aTSS	0.51338	0.20648	0.30691	0.918	K1	1
ENSG00000054690.13	PLEKHH1	42	chr14:67587301-67587548	+	APA	0.021274	0.26257	-0.2413	1	K1	0.8934
ENSG00000054690.13	PLEKHH1	43	chr14:67587549-67587681	+	APA	0.97886	0.73668	0.24218	0.999	K1	0.8934
ENSG00000152527.13	PLEKHH2	38	chr2:43765793-43767987	+	APA	0.87542	0.46168	0.41374	0.991	K1	0.9989
ENSG00000152527.13	PLEKHH2	37	chr2:43765413-43765792	+	APA	0.1286	0.53545	-0.40685	0.988	K1	0.9989
ENSG00000225190.10	PLEKHM1	17	chr17:45437471-45437969	-	APA	0.13464	0.29994	-0.16531	0.986	K2	1.1253
ENSG00000225190.10	PLEKHM1	18	chr17:45435904-45437470	-	APA	0.82265	0.66907	0.15358	0.984	K2	1.1253
ENSG00000120756.12	PLS1	21	chr3:142712056-142713659	+	APA	0.68852	0.87051	-0.18199	0.99	K2	0.9996
ENSG00000120756.12	PLS1	20	chr3:142711872-142712055	+	APA	0.30239	0.11827	0.18412	0.989	K2	0.9996
ENSG00000004399.12	PLXND1	50	chr3:129555214-129555217	-	APA	0.0059769	0.17018	-0.1642	0.996	K2	0.8252
ENSG00000004399.12	PLXND1	49	chr3:129555218-129556428	-	APA	0.99384	0.82966	0.16419	0.993	K2	0.8252
ENSG00000185664.14	PMEL	17	chr12:55957109-55957258	-	APA	0.58273	0.8684	-0.28567	0.902	K2	0.9991
ENSG00000140464.19	PML	5	chr15:73994733-73994743	+	aTSS	0.26275	0.030541	0.23221	0.902	K3	1.6989
ENSG00000032444.15	PNPLA6	11	chr19:7535789-7535932	+	AA	0.42712	0.65031	-0.22319	0.933	K1	0.9947
ENSG00000164087.7	POC1A	16	chr3:52075253-52075285	-	APA	0.17675	0.55402	-0.37727	0.911	K2	1.4066
ENSG00000139323.13	POC1B	23	chr12:89419718-89420786	-	APA	0.31888	0.44185	-0.12297	0.943	K2	1.5659
ENSG00000152359.14	POC5	2	chr5:75717431-75717435	-	aTSS	0.36563	0.90653	-0.5409	0.933	K2	1.1736
ENSG00000152359.14	POC5	1	chr5:75717436-75717481	-	aTSS	0.59848	0.061814	0.53667	0.916	K2	1.1736
ENSG00000101346.13	POFUT1	10	chr20:32234473-32234568	+	APA	0.61218	0.38214	0.23003	0.92	K1	0.9986
ENSG00000101346.13	POFUT1	11	chr20:32234569-32238667	+	APA	0.38674	0.61793	-0.23119	0.906	K1	0.9986
ENSG00000175482.8	POLD4	9	chr11:67353303-67353363	-	AD	0.68268	0.78007	-0.099995	0.971	K3	1.7128
ENSG00000186184.16	POLR1D	15	chr13:27665686-27666260	+	APA	0.13073	0.019175	0.11156	0.981	K3	1.5079
ENSG00000186184.16	POLR1D	16	chr13:27666261-27666262	+	APA	0.37961	0.51479	-0.13518	0.947	K3	1.5079
ENSG00000186184.16	POLR1D	1	chr13:27620758-27620946	+	aTSS	0.5394	0.26631	0.27308	0.937	K1	0.9876
ENSG00000186184.16	POLR1D	2	chr13:27620947-27621140	+	aTSS	0.46215	0.73158	-0.26943	0.93	K1	0.9876
ENSG00000047315.15	POLR2B	31	chr4:57031008-57031158	+	APA	0.39399	0.54362	-0.14963	0.906	K2	0.9997
ENSG00000130714.15	POMT1	5	chr9:131502959-131502983	+	aTSS	0.26114	0.035313	0.22582	0.993	K3	1.4664
ENSG00000130714.15	POMT1	2	chr9:131502918-131502924	+	aTSS	0.024627	0.26991	-0.24528	0.936	K3	1.4664
ENSG00000243207.6	PPAN-P2RY11	16	chr19:10114739-10114780	+	APA	0.99008	0.56552	0.42456	0.978	K1	0.9931
ENSG00000243207.6	PPAN-P2RY11	15	chr19:10113633-10114738	+	APA	0.0098239	0.43595	-0.42613	0.962	K1	0.9931
ENSG00000155846.16	PPARGC1B	20	chr5:149847563-149847627	+	APA	0.25796	0.003362	0.2546	0.993	K3	2.1006
ENSG00000155846.16	PPARGC1B	23	chr5:149847719-149847757	+	APA	0.0045871	0.29577	-0.29118	0.974	K3	2.1006
ENSG00000134283.17	PPHLN1	29	chr12:42441544-42441950	+	APA	0.26191	0.45331	-0.19141	0.927	K2	1.3481
ENSG00000100023.18	PPIL2	39	chr22:21696885-21697866	+	APA	0.8352	0.66212	0.17307	0.924	K3	1.5225
ENSG00000164088.17	PPM1M	21	chr3:52249791-52250595	+	APA	0.22657	0.94028	-0.71371	1	K2	1.0414
ENSG00000164088.17	PPM1M	20	chr3:52249670-52249790	+	APA	0.5792	0.034194	0.54501	1	K2	1.0414
ENSG00000213889.10	PPM1N	10	chr19:45502311-45502342	+	APA	0.062445	0.48189	-0.41944	0.996	K2	1.5315
ENSG00000213889.10	PPM1N	9	chr19:45502017-45502310	+	APA	0.7683	0.21836	0.54994	0.977	K2	1.5315
ENSG00000160972.9	PPP1R16A	16	chr8:144500392-144500486	+	RI	0.19693	0.096897	0.10004	0.925	K1	0.7415
ENSG00000175470.18	PPP2R2D	18	chr10:131956243-131956555	+	APA	0.63458	0.79945	-0.16487	0.991	K2	1.1193
ENSG00000175470.18	PPP2R2D	17	chr10:131955684-131956242	+	APA	0.34707	0.18455	0.16252	0.989	K2	1.1193
ENSG00000078304.19	PPP2R5C	9	chr14:101809866-101809894	+	aTSS	0.33491	0.48052	-0.14561	0.954	K3	1.6168
ENSG00000078304.19	PPP2R5C	8	chr14:101809835-101809865	+	aTSS	0.54415	0.4152	0.12895	0.925	K3	1.6168
ENSG00000154001.13	PPP2R5E	2	chr14:63543355-63543373	-	aTSS	0.74626	0.99192	-0.24566	1	K2	1.0598
ENSG00000154001.13	PPP2R5E	3	chr14:63543299-63543354	-	aTSS	0.24026	0.0079277	0.23233	1	K2	1.0598
ENSG00000275052.4	PPP4R3B	4	chr2:55617589-55617608	-	aTSS	0.43836	0.04496	0.3934	0.916	K2	0.9579
ENSG00000110075.14	PPP6R3	43	chr11:68614576-68614592	+	APA	0.61661	0.71558	-0.099995	0.941	K3	1.1295
ENSG00000221988.12	PPT2	2	chr6:32153999-32154094	+	aTSS	0.32648	0.60086	-0.27438	0.903	K1	0.9909
ENSG00000164306.10	PRIMPOL	16	chr4:184682248-184682336	+	ES	0.68335	0.92899	-0.24564	0.968	K1	0.9309
ENSG00000164306.10	PRIMPOL	18	chr4:184685412-184685498	+	ES	0.9456	0.82489	0.12071	0.907	K2	1.0677
ENSG00000164306.10	PRIMPOL	24	chr4:184694522-184694758	+	APA	0.44578	0.16241	0.28337	0.902	K2	0.9866
ENSG00000132356.11	PRKAA1	19	chr5:40762770-40763022	-	APA	0.44875	0.3399	0.10884	0.983	K1	1
ENSG00000132356.11	PRKAA1	20	chr5:40759379-40762769	-	APA	0.55132	0.65966	-0.10834	0.972	K1	1
ENSG00000163558.12	PRKCI	24	chr3:170303040-170303165	+	APA	0.63558	0.5065	0.12908	0.996	K2	1.2718
ENSG00000163558.12	PRKCI	25	chr3:170303166-170305977	+	APA	0.23148	0.43751	-0.20603	0.949	K2	1.2718
ENSG00000067606.16	PRKCZ	32	chr1:2185117-2185190	+	APA	0.25115	0.45181	-0.20066	0.994	K3	1.0914
ENSG00000105287.12	PRKD2	31	chr19:46674508-46674735	-	APA	0.17034	0.32264	-0.15231	0.95	K3	1.0034
ENSG00000105287.12	PRKD2	32	chr19:46674320-46674507	-	APA	0.81903	0.66858	0.15046	0.94	K3	1.0034
ENSG00000185532.15	PRKG1	22	chr10:52294177-52298350	+	APA	0.72134	0.98355	-0.26221	1	K1	0.9193
ENSG00000185532.15	PRKG1	21	chr10:52293802-52294176	+	APA	0.2813	0.016383	0.26492	1	K1	0.9193
ENSG00000180228.12	PRKRA	21	chr2:178431415-178431653	-	APA	0.47374	0.65821	-0.18448	0.907	K3	1.7267
ENSG00000160310.17	PRMT2	29	chr21:46664295-46664473	+	APA	0.15617	0.039812	0.11636	0.911	K2	0.9975
ENSG00000185238.12	PRMT3	19	chr11:20508304-20508708	+	APA	0.16	0.028906	0.1311	0.971	K2	1.1623
ENSG00000132600.16	PRMT7	4	chr16:68312042-68312176	+	ES	0.81748	0.60283	0.21465	0.903	K2	1.0931
ENSG00000167525.13	PROCA1	7	chr17:28704081-28704212	-	APA	0.031776	0.23085	-0.19908	0.979	K2	1.5749
ENSG00000185246.17	PRPF39	1	chr14:45084099-45084117	+	aTSS	0.37102	0.061509	0.30951	0.902	K2	1.4344
ENSG00000112739.16	PRPF4B	30	chr6:4062557-4062633	+	ES	0.88773	0.74054	0.14718	0.952	K5	3.0537
ENSG00000101911.12	PRPS2	3	chrX:12791488-12791619	+	aTSS	0.48592	0.34744	0.13848	0.909	K2	1.2045
ENSG00000112812.15	PRSS16	20	chr6:27255869-27256453	+	APA	0.84375	0.96888	-0.12513	0.952	K3	0.8651
ENSG00000125637.15	PSD4	29	chr2:113201567-113202912	+	APA	0.64056	0.5358	0.10476	0.931	K2	1.6146
ENSG00000125637.15	PSD4	22	chr2:113197747-113197749	+	AA	0.42876	0.59315	-0.16439	0.905	K2	1.2053
ENSG00000205220.11	PSMB10	17	chr16:67934502-67934505	-	APA	0.038696	0.16118	-0.12249	0.943	K1	0.8039
ENSG00000205220.11	PSMB10	16	chr16:67934506-67934671	-	APA	0.96102	0.83904	0.12198	0.926	K1	0.8039
ENSG00000100519.11	PSMC6	33	chr14:52727992-52727995	+	APA	0.24662	0.0017314	0.24488	0.994	K3	1.7731
ENSG00000100519.11	PSMC6	32	chr14:52727991-52727991	+	APA	0.27838	0.026588	0.25179	0.952	K3	1.7731
ENSG00000185627.17	PSMD13	27	chr11:252618-252956	+	APA	0.048685	0.25135	-0.20266	0.993	K2	1.5842
ENSG00000185627.17	PSMD13	26	chr11:252505-252617	+	APA	0.48669	0.35632	0.13037	0.964	K2	1.5842
ENSG00000115233.11	PSMD14	16	chr2:161411302-161411715	+	APA	0.69201	0.99802	-0.30601	0.998	K1	0.9983
ENSG00000115233.11	PSMD14	17	chr2:161411716-161411717	+	APA	0.30782	0.001917	0.3059	0.998	K1	0.9983
ENSG00000175166.16	PSMD2	1	chr3:184298709-184299238	+	aTSS	0.15613	0.0064648	0.14966	0.99	K2	0.8503
ENSG00000175166.16	PSMD2	2	chr3:184299239-184299250	+	aTSS	0.84247	0.99315	-0.15068	0.988	K2	0.8503
ENSG00000095261.13	PSMD5	3	chr9:120842883-120842911	-	aTSS	0.22415	0.061322	0.16283	0.981	K2	1.2941
ENSG00000095261.13	PSMD5	2	chr9:120842912-120842951	-	aTSS	0.70941	0.85241	-0.143	0.943	K2	1.2941
ENSG00000226752.9	PSMD5-AS1	2	chr9:120843100-120843439	+	aTSS	0.34208	0.72049	-0.37842	0.966	K1	0.9973
ENSG00000226752.9	PSMD5-AS1	1	chr9:120842996-120843099	+	aTSS	0.65588	0.28167	0.37421	0.959	K1	0.9973
ENSG00000110801.13	PSMD9	20	chr12:121916644-121916644	+	APA	0.050952	0.25884	-0.20789	0.911	K3	1.0248
ENSG00000110801.13	PSMD9	2	chr12:121888732-121888761	+	aTSS	0.85411	0.67422	0.17988	0.903	K3	1.5402
ENSG00000131467.10	PSME3	6	chr17:42833411-42833417	+	aTSS	0.025088	0.31261	-0.28753	1	K3	1.6447
ENSG00000131467.10	PSME3	7	chr17:42833418-42833444	+	aTSS	0.3036	0.070968	0.23263	0.988	K3	1.6447
ENSG00000068878.14	PSME4	52	chr2:53864870-53865573	-	APA	0.82085	0.56967	0.25118	0.916	K2	1.3616
ENSG00000068878.14	PSME4	53	chr2:53864861-53864869	-	APA	0.086398	0.32633	-0.23993	0.904	K2	1.3616
ENSG00000157778.8	PSMG3	4	chr7:1567351-1567850	-	APA	0.7623	0.50752	0.25478	0.934	K1	0.9874
ENSG00000157778.8	PSMG3	5	chr7:1567330-1567350	-	APA	0.23716	0.4929	-0.25574	0.922	K1	0.9874
ENSG00000156471.12	PTDSS1	1	chr8:96261715-96261912	+	aTSS	0.0050093	0.24603	-0.24102	0.991	K2	0.9788
ENSG00000156471.12	PTDSS1	2	chr8:96261913-96261966	+	aTSS	0.98778	0.75013	0.23765	0.983	K2	0.9788
ENSG00000158079.14	PTPDC1	14	chr9:94107828-94107912	+	APA	0.050557	0.84493	-0.79438	1	K2	1.3424
ENSG00000158079.14	PTPDC1	16	chr9:94109853-94109854	+	APA	0.18004	0.03137	0.14867	1	K2	1.3424
ENSG00000158079.14	PTPDC1	15	chr9:94107913-94109852	+	APA	0.7451	0.12721	0.61789	1	K2	1.3424
ENSG00000142949.16	PTPRF	49	chr1:43621935-43622357	+	APA	0.18386	0.087766	0.1	0.919	K3	1.5313
ENSG00000152894.14	PTPRK	1	chr6:128520600-128520674	-	aTSS	0.34425	0.1351	0.20915	0.944	K3	1.5528
ENSG00000060656.19	PTPRU	27	chr1:29311545-29311553	+	AD	0.35622	0.63676	-0.28053	0.97	K1	0.9738
ENSG00000170234.12	PWWP2A	9	chr5:160077844-160077932	-	APA	0.44376	0.14233	0.30143	0.955	K2	1.4086
ENSG00000168297.15	PXK	30	chr3:58425152-58426019	+	APA	0.65663	0.95126	-0.29463	1	K3	1.3247
ENSG00000168297.15	PXK	29	chr3:58425059-58425151	+	APA	0.26727	0.043737	0.22353	0.977	K3	1.3247
ENSG00000101417.11	PXMP4	7	chr20:33707489-33707969	-	APA	0.49574	0.3769	0.11884	0.994	K2	1.5354
ENSG00000101417.11	PXMP4	8	chr20:33707269-33707488	-	APA	0.33771	0.43413	-0.099995	0.985	K2	1.5354
ENSG00000143811.18	PYCR2	2	chr1:225924044-225924259	-	aTSS	0.83367	0.99119	-0.15752	0.982	K1	0.8695
ENSG00000143811.18	PYCR2	1	chr1:225924260-225924278	-	aTSS	0.16638	0.0088594	0.15753	0.977	K1	0.8695
ENSG00000151552.11	QDPR	13	chr4:17486527-17486799	-	APA	0.58718	0.24495	0.34223	0.932	K2	0.9957
ENSG00000169228.13	RAB24	2	chr5:177303709-177303710	-	aTSS	0.96721	0.64493	0.32228	1	K3	1.355
ENSG00000169228.13	RAB24	5	chr5:177303662-177303681	-	aTSS	0.012385	0.28489	-0.27251	0.999	K3	1.355
ENSG00000169228.13	RAB24	21	chr5:177301451-177301451	-	APA	0.023425	0.21206	-0.18863	0.944	K3	1.387
ENSG00000069974.15	RAB27A	12	chr15:55205349-55205352	-	APA	0.43833	0.0053915	0.43293	0.966	K2	1.5655
ENSG00000137502.9	RAB30	1	chr11:83071867-83071923	-	aTSS	0.03542	0.34348	-0.30806	0.928	K2	1.3126
ENSG00000118873.15	RAB3GAP2	44	chr1:220148293-220151182	-	APA	0.37114	0.49746	-0.12632	0.903	K2	1.1302
ENSG00000029725.16	RABEP1	3	chr17:5282487-5282520	+	aTSS	0.96751	0.79934	0.16818	0.911	K2	0.8748
ENSG00000029725.16	RABEP1	2	chr17:5282322-5282486	+	aTSS	0.032262	0.19944	-0.16718	0.906	K2	0.8748
ENSG00000185379.20	RAD51D	7	chr17:35119717-35119719	-	aTSS	0.12165	0.41388	-0.29223	0.956	K3	1.5675
ENSG00000204764.13	RANBP17	51	chr5:171298762-171298858	+	APA	0.49631	0.11629	0.38002	0.95	K2	1.3252
ENSG00000204764.13	RANBP17	53	chr5:171299178-171300015	+	APA	0.065661	0.18804	-0.12237	0.938	K2	1.3252
ENSG00000138698.14	RAP1GDS1	11	chr4:98379017-98379163	+	ES	0.71267	0.8189	-0.10623	0.921	K5	2.7951
ENSG00000107263.18	RAPGEF1	27	chr9:131576770-131576777	-	APA	0.014859	0.21849	-0.20363	0.987	K1	0.9403
ENSG00000107263.18	RAPGEF1	26	chr9:131576778-131579647	-	APA	0.98505	0.78102	0.20403	0.986	K1	0.9403
ENSG00000138670.17	RASGEF1B	25	chr4:81427449-81427792	-	APA	0.51182	0.12879	0.38303	0.962	K1	0.9868
ENSG00000138670.17	RASGEF1B	26	chr4:81427065-81427448	-	APA	0.4934	0.87312	-0.37972	0.959	K1	0.9868
ENSG00000099849.14	RASSF7	15	chr11:564013-564018	+	APA	0.79709	0.99358	-0.19648	0.963	K2	0.9866
ENSG00000099849.14	RASSF7	14	chr11:563558-564012	+	APA	0.2033	0.006257	0.19704	0.955	K2	0.9866
ENSG00000171174.13	RBKS	5	chr2:27848034-27848097	-	ES	0.8615	0.96149	-0.099995	0.9	K1	0.4791
ENSG00000112183.14	RBM24	10	chr6:17292764-17293023	+	APA	0.0054821	0.15075	-0.14526	1	K3	1.5737
ENSG00000112183.14	RBM24	12	chr6:17293031-17293866	+	APA	0.26028	0.40424	-0.14396	0.978	K3	1.5737
ENSG00000112183.14	RBM24	11	chr6:17293024-17293030	+	APA	0.69809	0.45124	0.24685	0.972	K3	1.5737
ENSG00000131051.22	RBM39	51	chr20:35704377-35704399	-	APA	0.267	0.39638	-0.12938	0.931	K3	1.8179
ENSG00000147274.14	RBMX	19	chrX:136869194-136870417	-	APA	0.016157	0.29743	-0.28127	1	K2	0.9636
ENSG00000147274.14	RBMX	20	chrX:136869192-136869193	-	APA	0.98253	0.70129	0.28124	1	K2	0.9636
ENSG00000166965.12	RCCD1	17	chr15:90962223-90962342	+	APA	0.36684	0.48065	-0.11381	0.944	K2	1.7734
ENSG00000163743.13	RCHY1	21	chr4:75482342-75482537	-	APA	0.15722	0.27362	-0.11639	0.973	K3	2.2365
ENSG00000117625.13	RCOR3	4	chr1:211259433-211259552	+	aTSS	0.19303	0.01539	0.17764	0.952	K3	1.5126
ENSG00000117625.13	RCOR3	5	chr1:211259553-211259605	+	aTSS	0.1458	0.6018	-0.45601	0.947	K3	1.5126
ENSG00000132563.15	REEP2	20	chr5:138445724-138445798	+	APA	0.026061	0.36032	-0.33426	0.936	K3	1.3388
ENSG00000134533.6	RERG	12	chr12:15107783-15107789	-	APA	0.003174	0.22856	-0.22539	0.996	K2	1.5488
ENSG00000042445.13	RETSAT	7	chr2:85350892-85351016	-	aTSS	0.22994	0.017952	0.21199	0.969	K1	0.9218
ENSG00000042445.13	RETSAT	8	chr2:85350780-85350891	-	aTSS	0.76874	0.98134	-0.21261	0.965	K1	0.9218
ENSG00000076043.9	REXO2	3	chr11:114439471-114439483	+	aTSS	0.5847	0.094201	0.4905	0.996	K3	1.9358
ENSG00000076043.9	REXO2	4	chr11:114439484-114439487	+	aTSS	0.19292	0.036375	0.15655	0.946	K3	1.9358
ENSG00000171700.13	RGS19	4	chr20:64076857-64076954	-	ES	0.95379	0.79068	0.16311	0.95	K2	1.6833
ENSG00000138835.22	RGS3	28	chr9:113541320-113541594	+	APA	0.14781	0.030385	0.11743	0.912	K2	0.7974
ENSG00000005486.16	RHBDD2	13	chr7:75888885-75888921	+	APA	0.46054	0.25646	0.20408	1	K3	1.932
ENSG00000100263.13	RHBDD3	1	chr22:29267961-29267978	-	aTSS	0.086759	0.48785	-0.4011	0.985	K1	0.962
ENSG00000100263.13	RHBDD3	2	chr22:29267748-29267960	-	aTSS	0.90994	0.51219	0.39775	0.984	K1	0.962
ENSG00000132677.12	RHBG	18	chr1:156385149-156385213	+	APA	0.79356	0.95489	-0.16133	0.922	K2	0.8937
ENSG00000167705.11	RILP	11	chr17:1646150-1646192	-	APA	0.87771	0.3696	0.50812	0.994	K1	1
ENSG00000167705.11	RILP	10	chr17:1646193-1646619	-	APA	0.12119	0.63002	-0.50883	0.988	K1	1
ENSG00000167705.11	RILP	9	chr17:1646906-1646989	-	ES	0.73369	0.8945	-0.16081	0.9	K1	0.8357
ENSG00000101098.12	RIMS4	9	chr20:44751808-44755910	-	APA	0.69983	0.87493	-0.1751	0.909	K1	0.9563
ENSG00000101098.12	RIMS4	8	chr20:44755911-44756352	-	APA	0.29937	0.12473	0.17463	0.9	K1	0.9563
ENSG00000174791.10	RIN1	22	chr11:66332590-66332752	-	APA	0.22759	0.008541	0.21905	1	K3	1.8396
ENSG00000170854.17	RIOX2	27	chr3:97944351-97944405	-	APA	0.34004	0.47927	-0.13923	0.968	K3	1.8356
ENSG00000139405.15	RITA1	3	chr12:113186185-113186192	+	AA	0.61073	0.83902	-0.22829	0.942	K2	1.4004
ENSG00000145916.18	RMND5B	25	chr5:178148567-178148568	+	APA	0.36556	0.15615	0.20941	0.907	K3	1.8806
ENSG00000234171.2	RNASEH1-AS1	1	chr2:3558492-3558577	+	aTSS	0.48212	0.85743	-0.37531	0.914	K1	0.9994
ENSG00000234171.2	RNASEH1-AS1	2	chr2:3558578-3558998	+	aTSS	0.51746	0.14432	0.37314	0.91	K1	0.9994
ENSG00000136104.19	RNASEH2B	11	chr13:50953905-50953985	+	ES	0.73461	0.84326	-0.10865	0.906	K2	1.3635
ENSG00000172922.8	RNASEH2C	11	chr11:65719721-65719809	-	APA	0.66374	0.56561	0.1	0.974	K2	1.4302
ENSG00000219200.11	RNASEK	1	chr17:7012417-7012460	+	aTSS	0.20818	0.039174	0.169	0.993	K3	1.5331
ENSG00000219200.11	RNASEK	2	chr17:7012461-7012610	+	aTSS	0.62138	0.801	-0.17962	0.99	K3	1.5331
ENSG00000172602.9	RND1	8	chr12:48857147-48858096	-	APA	0.8787	0.55982	0.31888	0.999	K2	1.1261
ENSG00000172602.9	RND1	7	chr12:48858097-48858241	-	APA	0.074656	0.41178	-0.33712	0.998	K2	1.1261
ENSG00000070423.17	RNF126	18	chr19:647530-648131	-	APA	0.42976	0.080671	0.34909	0.95	K2	1.488
ENSG00000070423.17	RNF126	19	chr19:647526-647529	-	APA	0.16446	0.5366	-0.37213	0.9	K2	1.488
ENSG00000145860.11	RNF145	18	chr5:159158291-159158298	-	APA	0.34703	0.46985	-0.12282	0.995	K3	1.3968
ENSG00000145860.11	RNF145	19	chr5:159157411-159158290	-	APA	0.56369	0.45935	0.10435	0.995	K3	1.3968
ENSG00000141622.13	RNF165	12	chr18:46456519-46460820	+	APA	0.81689	0.45029	0.36661	0.986	K1	0.9985
ENSG00000141622.13	RNF165	13	chr18:46460821-46463140	+	APA	0.18284	0.55089	-0.36804	0.984	K1	0.9985
ENSG00000121481.10	RNF2	10	chr1:185100200-185101057	+	APA	0.5073	0.63069	-0.12339	0.966	K1	0.9999
ENSG00000121481.10	RNF2	11	chr1:185101058-185102608	+	APA	0.4932	0.36876	0.12444	0.955	K1	0.9999
ENSG00000158286.12	RNF207	6	chr1:6207565-6208307	+	APA	0.46282	0.84905	-0.38622	0.991	K1	0.998
ENSG00000158286.12	RNF207	5	chr1:6207379-6207564	+	APA	0.53452	0.14999	0.38453	0.986	K1	0.998
ENSG00000101236.16	RNF24	9	chr20:3933567-3934201	-	APA	0.39075	0.21753	0.17323	0.966	K2	1.5218
ENSG00000137075.17	RNF38	15	chr9:36339581-36339814	-	APA	0.26763	0.064112	0.20352	0.959	K1	0.9703
ENSG00000137075.17	RNF38	16	chr9:36336396-36339580	-	APA	0.73197	0.93579	-0.20382	0.956	K1	0.9703
ENSG00000146083.11	RNF44	22	chr5:176526697-176528938	-	APA	0.42917	0.53149	-0.10232	0.918	K2	1.4693
ENSG00000101654.17	RNMT	23	chr18:13762039-13762344	+	APA	0.13916	0.023868	0.11529	0.926	K2	1.7752
ENSG00000205937.11	RNPS1	6	chr16:2267329-2267603	-	aTSS	0.045901	0.31652	-0.27062	0.931	K1	0.9973
ENSG00000205937.11	RNPS1	7	chr16:2267238-2267328	-	aTSS	0.95189	0.6814	0.27048	0.928	K1	0.9973
ENSG00000149489.8	ROM1	4	chr11:62614621-62615100	+	APA	0.61416	0.16346	0.45069	0.905	K1	0.9649
ENSG00000181031.15	RPH3AL	13	chr17:213645-213923	-	APA	0.12411	0.0084959	0.11561	0.98	K2	1.384
ENSG00000181031.15	RPH3AL	15	chr17:212502-213323	-	APA	0.56856	0.75938	-0.19082	0.936	K2	1.384
ENSG00000163923.9	RPL39L	4	chr3:187139213-187139484	-	aTSS	0.62518	0.32904	0.29615	0.924	K1	0.9999
ENSG00000163923.9	RPL39L	3	chr3:187139485-187139523	-	aTSS	0.37608	0.67176	-0.29568	0.911	K1	0.9999
ENSG00000229117.8	RPL41	2	chr12:56116590-56116631	+	aTSS	0.0084801	0.33613	-0.32765	0.983	K2	1
ENSG00000229117.8	RPL41	3	chr12:56116632-56116659	+	aTSS	0.99113	0.66489	0.32624	0.978	K2	1
ENSG00000117676.13	RPS6KA1	30	chr1:26574079-26574276	+	APA	0.071596	0.29541	-0.22381	0.957	K2	0.9999
ENSG00000071242.11	RPS6KA2	28	chr6:166412748-166412887	-	APA	0.0047108	0.15112	-0.14641	0.994	K3	1.4433
ENSG00000071242.11	RPS6KA2	29	chr6:166412659-166412747	-	APA	0.33411	0.076449	0.25766	0.923	K3	1.4433
ENSG00000170889.13	RPS9	21	chr19:54207523-54207630	+	APA	0.21487	0.31533	-0.10046	1	K2	1.7584
ENSG00000116954.7	RRAGC	8	chr1:38839349-38839704	-	APA	0.16825	0.060104	0.10815	0.902	K1	0.8499
ENSG00000133818.13	RRAS2	11	chr11:14279110-14279424	-	APA	0.0023866	0.18753	-0.18515	0.989	K3	1.851
ENSG00000133818.13	RRAS2	12	chr11:14279103-14279109	-	APA	0.48536	0.10504	0.38032	0.969	K3	1.851
ENSG00000125844.15	RRBP1	39	chr20:17613678-17614127	-	APA	0.32182	0.45514	-0.13333	0.93	K1	0.9996
ENSG00000125844.15	RRBP1	38	chr20:17614128-17614220	-	APA	0.67843	0.54437	0.13406	0.927	K1	0.9996
ENSG00000167325.14	RRM1	3	chr11:4094843-4094851	+	aTSS	0.31596	0.11691	0.19904	0.9	K2	1.4254
ENSG00000081019.13	RSBN1	16	chr1:113765848-113766144	-	APA	0.13857	0.26886	-0.13029	0.92	K3	2.5064
ENSG00000148484.17	RSU1	2	chr10:16817455-16817463	-	aTSS	0.11395	0.25148	-0.13754	0.911	K2	1.4877
ENSG00000026036.21	RTEL1-TNFRSF6B	27	chr20:63689866-63690086	+	RI	0.4018	0.16405	0.23775	0.936	K2	1.2011
ENSG00000203950.6	RTL8A	4	chrX:135051520-135051916	-	RI	0.37682	0.5142	-0.13738	0.999	K1	1
ENSG00000203950.6	RTL8A	5	chrX:135051369-135051519	-	AA	0.37693	0.51599	-0.13905	0.997	K1	1
ENSG00000133318.13	RTN3	4	chr11:63681483-63681495	+	aTSS	0.17192	0.0027181	0.1692	0.998	K3	1.8356
ENSG00000133318.13	RTN3	6	chr11:63681500-63681538	+	aTSS	0.25597	0.49124	-0.23527	0.978	K3	1.8356
ENSG00000183207.13	RUVBL2	24	chr19:49015817-49015926	+	APA	0.28573	0.013068	0.27266	0.98	K2	1.1384
ENSG00000183207.13	RUVBL2	25	chr19:49015927-49015929	+	APA	0.68213	0.92495	-0.24282	0.93	K2	1.1384
ENSG00000189334.8	S100A14	6	chr1:153614258-153615022	-	APA	0.86336	0.9976	-0.13423	1	K1	0.7185
ENSG00000189334.8	S100A14	7	chr1:153614255-153614257	-	APA	0.13663	0.0023677	0.13426	1	K1	0.7185
ENSG00000116497.17	S100PBP	17	chr1:32855924-32856185	+	APA	0.29202	0.18119	0.11083	0.956	K2	0.9424
ENSG00000116497.17	S100PBP	19	chr1:32857855-32858879	+	APA	0.70859	0.81899	-0.1104	0.941	K2	0.9424
ENSG00000160633.12	SAFB	37	chr19:5668350-5668466	+	APA	0.046627	0.32535	-0.27872	1	K3	1.396
ENSG00000160633.12	SAFB	38	chr19:5668467-5668471	+	APA	0.12661	0.0065921	0.12001	0.995	K3	1.396
ENSG00000160633.12	SAFB	39	chr19:5668472-5668478	+	APA	0.15482	0.0067129	0.14811	0.989	K3	1.396
ENSG00000165821.11	SALL2	17	chr14:21521537-21521621	-	APA	0.3199	0.13042	0.18948	0.947	K3	1.6444
ENSG00000165821.11	SALL2	18	chr14:21521083-21521536	-	APA	0.57753	0.7697	-0.19217	0.903	K3	1.6444
ENSG00000101115.12	SALL4	10	chr20:51784046-51784264	-	APA	0.51116	0.35921	0.15194	0.931	K2	1.3522
ENSG00000004139.13	SARM1	15	chr17:28398054-28398135	+	APA	0.026156	0.41357	-0.38742	0.945	K2	1.1644
ENSG00000175467.14	SART1	1	chr11:65961689-65961727	+	aTSS	0.70861	0.922	-0.2134	0.927	K1	0.9808
ENSG00000175467.14	SART1	2	chr11:65961728-65962093	+	aTSS	0.29221	0.076886	0.21533	0.917	K1	0.9808
ENSG00000075856.11	SART3	34	chr12:108522580-108522707	-	APA	0.36865	0.56933	-0.20068	0.997	K2	1.5834
ENSG00000075856.11	SART3	32	chr12:108523412-108523634	-	APA	0.26387	0.059338	0.20453	0.971	K2	1.5834
ENSG00000133812.15	SBF2	50	chr11:9778667-9779153	-	APA	0.19603	0.3504	-0.15437	0.974	K1	0.9458
ENSG00000133812.15	SBF2	49	chr11:9779154-9780516	-	APA	0.80472	0.65003	0.1547	0.972	K1	0.9458
ENSG00000116521.10	SCAMP3	16	chr1:155255979-155255980	-	APA	0.2014	0.0026133	0.19879	0.994	K2	1.5633
ENSG00000116521.10	SCAMP3	15	chr1:155255981-155256240	-	APA	0.53417	0.81963	-0.28546	0.921	K2	1.5633
ENSG00000151466.11	SCLT1	4	chr4:129093378-129093410	-	aTSS	0.44631	0.26635	0.17996	0.932	K3	1.5286
ENSG00000105711.11	SCN1B	16	chr19:35040074-35040449	+	APA	0.76272	0.98232	-0.21959	0.964	K1	0.9876
ENSG00000105711.11	SCN1B	15	chr19:35039797-35040073	+	APA	0.23672	0.017603	0.21912	0.955	K1	0.9876
ENSG00000196876.15	SCN8A	36	chr12:51806282-51807429	+	APA	0.19808	0.56716	-0.36908	0.905	K1	1
ENSG00000163156.11	SCNM1	17	chr1:151168986-151169111	+	APA	0.20515	0.017986	0.18716	0.902	K2	1.0019
ENSG00000234684.6	SDCBP2-AS1	6	chr20:1378184-1378734	+	APA	0.64695	0.96134	-0.31439	0.996	K1	0.9931
ENSG00000234684.6	SDCBP2-AS1	5	chr20:1376798-1378183	+	APA	0.35524	0.040091	0.31515	0.996	K1	0.9931
ENSG00000073578.16	SDHA	21	chr5:249054-250693	+	aTSS	0.025323	0.87058	-0.84526	1	K1	0.6468
ENSG00000073578.16	SDHA	22	chr5:250694-250776	+	aTSS	0.97389	0.12765	0.84624	1	K1	0.6468
ENSG00000157020.17	SEC13	13	chr3:10312835-10313971	-	aTSS	0.048562	0.29793	-0.24937	0.912	K1	0.998
ENSG00000157020.17	SEC13	14	chr3:10312731-10312834	-	aTSS	0.9512	0.70358	0.24762	0.906	K1	0.998
ENSG00000101310.14	SEC23B	1	chr20:18507555-18507578	+	aTSS	0.24515	0.019458	0.22569	0.968	K1	0.936
ENSG00000101310.14	SEC23B	2	chr20:18507579-18507972	+	aTSS	0.75538	0.9805	-0.22512	0.967	K1	0.936
ENSG00000150961.14	SEC24D	43	chr4:118722830-118723023	-	APA	0.33064	0.5694	-0.23876	0.985	K2	1.5478
ENSG00000150961.14	SEC24D	41	chr4:118723521-118723655	-	APA	0.24721	0.02238	0.22483	0.981	K2	1.5478
ENSG00000138593.8	SECISBP2L	16	chr15:49019418-49019552	-	ES	0.58381	0.7511	-0.16729	0.952	K2	1.1281
ENSG00000085415.15	SEH1L	1	chr18:12947995-12948013	+	aTSS	0.83183	0.61554	0.21629	0.918	K2	1.331
ENSG00000091490.10	SEL1L3	33	chr4:25748266-25748564	-	APA	0.14785	0.024311	0.12354	0.989	K3	1.7704
ENSG00000135622.12	SEMA4F	20	chr2:74680747-74682059	+	APA	0.59818	0.82072	-0.22254	0.904	K2	1.2691
ENSG00000095539.15	SEMA4G	23	chr10:100984804-100985258	+	APA	0.26985	0.078338	0.19151	0.94	K2	1.2382
ENSG00000092421.16	SEMA6A	32	chr5:116445750-116446133	-	APA	0.23561	0.080152	0.15545	0.932	K3	1.8515
ENSG00000186522.14	Sep-10	7	chr2:109574581-109574767	-	ES	0.93334	0.77075	0.16259	0.911	K1	0.8028
ENSG00000196136.17	SERPINA3	2	chr14:94612384-94612390	+	aTSS	0.23213	0.017205	0.21492	0.96	K2	1.5849
ENSG00000167711.13	SERPINF2	12	chr17:1754122-1754642	+	APA	0.14005	0.41781	-0.27777	0.931	K1	0.9988
ENSG00000167711.13	SERPINF2	13	chr17:1754643-1755268	+	APA	0.86241	0.58237	0.28004	0.927	K1	0.9988
ENSG00000155542.11	SETD9	2	chr5:56909352-56909592	+	aTSS	0.89861	0.60508	0.29354	0.97	K2	0.9874
ENSG00000155542.11	SETD9	1	chr5:56909260-56909351	+	aTSS	0.10421	0.3972	-0.29299	0.967	K2	0.9874
ENSG00000136169.16	SETDB2	9	chr13:49467864-49467960	+	ES	0.81707	0.94894	-0.13187	0.933	K3	2.3067
ENSG00000170364.12	SETMAR	8	chr3:4313230-4313646	+	RI	0.62432	0.42093	0.20339	0.916	K5	3.1219
ENSG00000170364.12	SETMAR	9	chr3:4313647-4313666	+	AA	0.73728	0.53232	0.20496	0.903	K5	3.1219
ENSG00000198089.15	SFI1	36	chr22:31613602-31613855	+	ES	0.96208	0.85272	0.10936	0.932	K4	2.3804
ENSG00000116560.10	SFPQ	16	chr1:35178665-35179105	-	aTSS	0.8642	0.99799	-0.13379	1	K2	0.7449
ENSG00000116560.10	SFPQ	15	chr1:35179106-35179246	-	aTSS	0.13584	0.0020482	0.13379	0.998	K2	0.7449
ENSG00000104205.12	SGK3	20	chr8:66859411-66860455	+	APA	0.0034411	0.10622	-0.10278	1	K2	1.3687
ENSG00000141258.12	SGSM2	31	chr17:2374282-2374580	+	APA	0.58588	0.84936	-0.26348	0.996	K1	0.9946
ENSG00000141258.12	SGSM2	30	chr17:2373514-2374281	+	APA	0.41339	0.15204	0.26135	0.993	K1	0.9946
ENSG00000100359.20	SGSM3	36	chr22:40409682-40409811	+	APA	0.0121	0.15037	-0.13827	0.931	K2	1.1325
ENSG00000109686.17	SH3D19	20	chr4:151144220-151144288	-	ES	0.7488	0.51007	0.23873	0.956	K1	0.9985
ENSG00000176974.19	SHMT1	4	chr17:18363496-18363501	-	aTSS	0.59004	0.24593	0.34411	0.964	K3	2.1283
ENSG00000144736.13	SHQ1	15	chr3:72749959-72750836	-	APA	0.19586	0.33741	-0.14155	0.927	K2	1.2837
ENSG00000072858.10	SIDT1	31	chr3:113627842-113629578	+	APA	0.51015	0.39098	0.11917	0.98	K2	1.5619
ENSG00000147955.16	SIGMAR1	13	chr9:34635483-34635496	-	APA	0.25299	0.096902	0.15608	0.985	K2	1.0542
ENSG00000147955.16	SIGMAR1	14	chr9:34634722-34635482	-	APA	0.73104	0.88784	-0.1568	0.982	K2	1.0542
ENSG00000127511.9	SIN3B	34	chr19:16880351-16880353	+	APA	0.052461	0.29878	-0.24631	0.941	K3	1.9515
ENSG00000127511.9	SIN3B	33	chr19:16879061-16880350	+	APA	0.6574	0.34857	0.30883	0.913	K3	1.9515
ENSG00000213445.9	SIPA1	26	chr11:65650588-65650880	+	APA	0.50947	0.080488	0.42898	0.921	K2	0.9992
ENSG00000213445.9	SIPA1	27	chr11:65650881-65650918	+	APA	0.492	0.91988	-0.42787	0.916	K2	0.9992
ENSG00000177045.7	SIX5	2	chr19:45768042-45768627	-	aTSS	0.15609	0.31007	-0.15397	0.901	K1	0.9793
ENSG00000039123.15	SKIV2L2	32	chr5:55424720-55424985	+	APA	0.3765	0.57528	-0.19877	0.998	K2	1.5276
ENSG00000039123.15	SKIV2L2	33	chr5:55424986-55425106	+	APA	0.17618	0.053129	0.12305	0.932	K2	1.5276
ENSG00000120519.14	SLC10A7	5	chr4:146521718-146521830	-	aTSS	0.34221	0.11427	0.22794	0.926	K3	2.0942
ENSG00000120519.14	SLC10A7	9	chr4:146509913-146510049	-	ES	0.83748	0.95172	-0.11424	0.902	K1	0.5678
ENSG00000139370.11	SLC15A4	7	chr12:128809943-128810111	-	ES	0.8827	0.76244	0.12025	0.958	K4	1.4784
ENSG00000139370.11	SLC15A4	15	chr12:128793895-128794172	-	APA	0.45651	0.34946	0.10705	0.943	K2	1.1605
ENSG00000155380.11	SLC16A1	11	chr1:112914025-112914165	-	APA	0.54132	0.42638	0.11494	0.98	K2	1.1102
ENSG00000155380.11	SLC16A1	12	chr1:112911852-112914024	-	APA	0.44286	0.55353	-0.11067	0.973	K2	1.1102
ENSG00000118596.11	SLC16A7	18	chr12:59780214-59789855	+	APA	0.43427	0.54073	-0.10646	0.966	K3	1.5415
ENSG00000173638.18	SLC19A1	15	chr21:45514715-45514895	-	APA	0.74565	0.63278	0.11287	0.933	K1	0.9623
ENSG00000173638.18	SLC19A1	16	chr21:45513776-45514714	-	APA	0.25492	0.36803	-0.11311	0.932	K1	0.9623
ENSG00000115902.10	SLC1A4	12	chr2:65023864-65023865	+	APA	0.12056	0.22196	-0.1014	0.953	K2	1.4652
ENSG00000115902.10	SLC1A4	10	chr2:65020912-65021394	+	APA	0.46937	0.21014	0.25923	0.914	K2	1.4652
ENSG00000115840.13	SLC25A12	24	chr2:171784775-171784831	-	APA	0.012331	0.14833	-0.136	0.97	K2	1.51
ENSG00000102078.15	SLC25A14	23	chrX:130373315-130373361	+	APA	0.97796	0.8057	0.17226	0.937	K2	0.9485
ENSG00000102078.15	SLC25A14	22	chrX:130372951-130373314	+	APA	0.021392	0.19446	-0.17306	0.936	K2	0.9485
ENSG00000183032.11	SLC25A21	1	chr14:37172424-37172866	-	aTSS	0.39159	0.12668	0.26492	0.939	K1	0.9826
ENSG00000183032.11	SLC25A21	2	chr14:37172281-37172423	-	aTSS	0.60771	0.86748	-0.25977	0.937	K1	0.9826
ENSG00000197119.12	SLC25A29	1	chr14:100306518-100306533	-	aTSS	0.76906	0.046409	0.72265	0.997	K3	0.9881
ENSG00000197119.12	SLC25A29	21	chr14:100292735-100292780	-	APA	0.1758	0.057814	0.11798	0.909	K3	1.5375
ENSG00000013306.15	SLC25A39	26	chr17:44319627-44319635	-	APA	0.17906	0.28395	-0.10489	0.998	K2	0.9069
ENSG00000013306.15	SLC25A39	25	chr17:44319636-44319869	-	APA	0.82085	0.71569	0.10517	0.997	K2	0.9069
ENSG00000164209.16	SLC25A46	2	chr5:110738994-110739040	+	aTSS	0.19548	0.010201	0.18528	0.942	K1	0.9826
ENSG00000164209.16	SLC25A46	3	chr5:110739041-110739402	+	aTSS	0.80317	0.98992	-0.18675	0.932	K1	0.9826
ENSG00000224281.4	SLC25A5-AS1	6	chrX:119466424-119467750	-	APA	0.13718	0.74306	-0.60588	0.992	K1	0.8911
ENSG00000224281.4	SLC25A5-AS1	7	chrX:119466034-119466423	-	APA	0.86338	0.25846	0.60491	0.992	K1	0.8911
ENSG00000181045.14	SLC26A11	28	chr17:80253499-80253500	+	APA	0.10837	0.50127	-0.39289	0.974	K2	0.9966
ENSG00000181045.14	SLC26A11	27	chr17:80252717-80253498	+	APA	0.48693	0.0095653	0.47736	0.949	K2	0.9966
ENSG00000130304.16	SLC27A1	22	chr19:17504987-17506168	+	APA	0.58667	0.88333	-0.29666	0.984	K1	0.983
ENSG00000130304.16	SLC27A1	21	chr19:17504455-17504986	+	APA	0.41195	0.11562	0.29633	0.982	K1	0.983
ENSG00000167114.12	SLC27A4	2	chr9:128340728-128340838	+	aTSS	0.5055	0.82776	-0.32226	0.939	K1	0.9951
ENSG00000167114.12	SLC27A4	1	chr9:128340646-128340727	+	aTSS	0.49404	0.17504	0.319	0.92	K1	0.9951
ENSG00000164638.10	SLC29A4	9	chr7:5291693-5291729	+	AA	0.50324	0.83934	-0.33611	0.97	K1	0.9843
ENSG00000173262.11	SLC2A14	32	chr12:7813529-7813800	-	APA	0.045959	0.21973	-0.17377	0.901	K3	1.7025
ENSG00000152683.14	SLC30A6	22	chr2:32224100-32224112	+	APA	0.21331	0.0061788	0.20713	0.963	K3	1.5814
ENSG00000102100.15	SLC35A2	12	chrX:48905859-48905955	-	APA	0.8334	0.9639	-0.1305	0.903	K1	0.7442
ENSG00000205060.10	SLC35B4	15	chr7:134294606-134294961	-	APA	0.0021427	0.12497	-0.12283	0.994	K2	1.5225
ENSG00000103042.8	SLC38A7	19	chr16:58671045-58671244	-	ES	0.95503	0.83876	0.11626	0.907	K1	0.584
ENSG00000033867.16	SLC4A7	35	chr3:27376764-27376845	-	APA	0.0014373	0.38494	-0.3835	0.999	K2	1.4608
ENSG00000033867.16	SLC4A7	36	chr3:27376606-27376763	-	APA	0.52764	0.29773	0.22991	0.938	K2	1.4608
ENSG00000196517.11	SLC6A9	19	chr1:43997528-43997739	-	APA	0.46063	0.13531	0.32532	0.929	K1	0.9994
ENSG00000196517.11	SLC6A9	20	chr1:43997443-43997527	-	APA	0.53886	0.86402	-0.32516	0.925	K1	0.9994
ENSG00000101187.15	SLCO4A1	19	chr20:62672294-62672295	+	APA	0.82859	0.99232	-0.16372	0.963	K1	0.9383
ENSG00000101187.15	SLCO4A1	18	chr20:62671750-62672293	+	APA	0.17186	0.0078363	0.16402	0.958	K1	0.9383
ENSG00000137776.16	SLTM	4	chr15:58933580-58933599	-	aTSS	0.42729	0.20875	0.21854	0.946	K3	1.914
ENSG00000213599.10	SLX1A-SULT1A3	5	chr16:30194499-30194577	+	aTSS	0.36237	0.19005	0.17232	0.917	K3	1.54
ENSG00000113658.16	SMAD5	10	chr5:136153764-136154144	+	APA	0.43586	0.62575	-0.18989	0.984	K2	1.5431
ENSG00000080503.22	SMARCA2	56	chr9:2193561-2193574	+	APA	0.31006	0.42638	-0.11633	0.944	K3	1.7963
ENSG00000066117.14	SMARCD1	21	chr12:50099098-50099246	+	APA	0.36125	0.24933	0.11192	0.915	K2	1.2756
ENSG00000113810.15	SMC4	49	chr3:160433991-160434953	+	APA	0.77662	0.67901	0.1	0.976	K3	1.4975
ENSG00000163029.15	SMC6	9	chr2:17753774-17753803	-	aTSS	0.75396	0.9314	-0.17744	0.907	K2	0.8709
ENSG00000166002.6	SMCO4	7	chr11:93479049-93479189	-	APA	0.28889	0.018799	0.27009	0.949	K2	1.3518
ENSG00000172062.16	SMN1	1	chr5:70925030-70925055	+	aTSS	0.55003	0.44309	0.10694	0.901	K2	1.3593
ENSG00000103056.11	SMPD3	18	chr16:68361127-68361133	-	APA	0.043841	0.47623	-0.43239	0.916	K2	0.9177
ENSG00000103056.11	SMPD3	19	chr16:68358325-68361126	-	APA	0.95597	0.52477	0.4312	0.902	K2	0.9177
ENSG00000183963.18	SMTN	28	chr22:31096733-31096897	+	ES	0.85141	0.7218	0.12961	0.931	K3	1.8315
ENSG00000183963.18	SMTN	29	chr22:31096998-31097060	+	ES	0.8483	0.72258	0.12572	0.924	K3	1.8315
ENSG00000092531.9	SNAP23	17	chr15:42533060-42533061	+	APA	0.34224	0.068812	0.27343	1	K3	2.0386
ENSG00000092531.9	SNAP23	16	chr15:42531828-42533059	+	APA	0.081867	0.44106	-0.35919	0.999	K3	2.0386
ENSG00000159210.9	SNF8	22	chr17:48930388-48930389	-	APA	0.54832	0.1015	0.44682	0.954	K2	1.414
ENSG00000159210.9	SNF8	21	chr17:48930390-48930612	-	APA	0.34535	0.85987	-0.51452	0.952	K2	1.414
ENSG00000232956.8	SNHG15	1	chr7:44986835-44986961	-	aTSS	0.026387	0.2714	-0.24501	0.947	K3	1.584
ENSG00000196756.11	SNHG17	14	chr20:38421099-38422241	-	AA	0.41506	0.63157	-0.21651	0.944	K3	2.0613
ENSG00000060688.12	SNRNP40	18	chr1:31259674-31259709	-	APA	0.21114	0.0051621	0.20598	0.988	K3	1.1237
ENSG00000060688.12	SNRNP40	19	chr1:31259673-31259673	-	APA	0.097374	0.36812	-0.27074	0.953	K3	1.1237
ENSG00000182004.12	SNRPE	12	chr1:203870082-203870084	+	APA	0.28185	0.13984	0.14201	0.934	K2	1.0336
ENSG00000182004.12	SNRPE	11	chr1:203870052-203870081	+	APA	0.70884	0.85058	-0.14174	0.925	K2	1.0336
ENSG00000002919.14	SNX11	11	chr17:48112086-48112111	+	AD	0.40826	0.23793	0.17033	0.931	K4	2.1069
ENSG00000071189.21	SNX13	3	chr7:17940452-17940468	-	aTSS	0.049098	0.21011	-0.16101	0.902	K3	1.5583
ENSG00000115234.10	SNX17	31	chr2:27376606-27377123	+	APA	0.0046804	0.29447	-0.28979	0.992	K2	1.2234
ENSG00000115234.10	SNX17	32	chr2:27377124-27377127	+	APA	0.94503	0.66301	0.28201	0.955	K2	1.2234
ENSG00000124104.18	SNX21	17	chr20:45841135-45841730	+	APA	0.65208	0.86248	-0.2104	0.904	K2	0.9977
ENSG00000114520.10	SNX4	16	chr3:125446644-125447710	-	APA	0.37332	0.51526	-0.14194	0.998	K1	1
ENSG00000114520.10	SNX4	15	chr3:125447711-125447826	-	APA	0.6263	0.48436	0.14193	0.997	K1	1
ENSG00000120833.13	SOCS2	18	chr12:93575510-93576019	+	APA	0.45891	0.2697	0.18921	0.938	K2	1.1345
ENSG00000159140.19	SON	2	chr21:33543052-33543063	+	aTSS	0.56279	0.80739	-0.2446	0.932	K2	1.0578
ENSG00000159140.19	SON	1	chr21:33542618-33543051	+	aTSS	0.42826	0.18439	0.24386	0.932	K2	1.0578
ENSG00000163071.10	SPATA18	17	chr4:52095894-52097292	+	APA	0.60467	0.89522	-0.29055	0.97	K1	0.9799
ENSG00000163071.10	SPATA18	16	chr4:52094880-52095893	+	APA	0.39554	0.10396	0.29158	0.96	K1	0.9799
ENSG00000196141.13	SPATS2L	28	chr2:200477883-200478209	+	APA	0.26722	0.16984	0.1	0.947	K3	1.31
ENSG00000124664.10	SPDEF	1	chr6:34556315-34556333	-	aTSS	0.0029733	0.15998	-0.15701	1	K1	0.7367
ENSG00000124664.10	SPDEF	2	chr6:34555929-34556314	-	aTSS	0.99699	0.83993	0.15706	1	K1	0.7367
ENSG00000040275.16	SPDL1	1	chr5:169583634-169583749	+	aTSS	0.80644	0.20424	0.60219	0.955	K2	1.1175
ENSG00000040275.16	SPDL1	2	chr5:169583750-169583755	+	aTSS	0.17435	0.76104	-0.58669	0.952	K2	1.1175
ENSG00000063176.15	SPHK2	24	chr19:48629917-48630405	+	APA	0.53807	0.73624	-0.19817	0.906	K2	0.9969
ENSG00000164808.16	SPIDR	49	chr8:47736000-47736306	+	APA	0.16912	0.058132	0.11099	0.929	K4	1.8691
ENSG00000186787.8	SPIN2B	7	chrX:57119683-57119887	-	APA	0.56959	0.76513	-0.19554	0.963	K2	1.3448
ENSG00000186787.8	SPIN2B	6	chrX:57119888-57120631	-	APA	0.32632	0.09466	0.23166	0.963	K2	1.3448
ENSG00000204271.12	SPIN3	10	chrX:56990895-56990941	-	APA	0.026839	0.18198	-0.15514	0.993	K2	1.5543
ENSG00000152377.13	SPOCK1	14	chr5:136978454-136978844	-	APA	0.081517	0.43432	-0.35281	0.91	K1	0.9492
ENSG00000121067.17	SPOP	2	chr17:49678083-49678110	-	aTSS	0.56342	0.68068	-0.11726	0.916	K3	1.7358
ENSG00000010072.15	SPRTN	12	chr1:231352610-231352754	+	APA	0.13605	0.013322	0.12273	0.986	K2	1.5214
ENSG00000123178.14	SPRYD7	1	chr13:49936341-49936490	-	aTSS	0.53174	0.13576	0.39599	0.946	K2	1.1287
ENSG00000123178.14	SPRYD7	2	chr13:49936308-49936340	-	aTSS	0.4586	0.84307	-0.38447	0.937	K2	1.1287
ENSG00000162032.15	SPSB3	21	chr16:1776749-1776794	-	APA	0.0062203	0.38113	-0.37491	0.924	K3	1.2348
ENSG00000153914.15	SREK1	36	chr5:66180812-66180879	+	APA	0.19006	0.34447	-0.15441	0.994	K3	1.4489
ENSG00000153914.15	SREK1	35	chr5:66179115-66180811	+	APA	0.18604	0.06276	0.12328	0.98	K3	1.4489
ENSG00000161547.16	SRSF2	1	chr17:76737334-76737374	-	aTSS	0.99717	0.56897	0.4282	0.953	K2	0.9835
ENSG00000161547.16	SRSF2	2	chr17:76737332-76737333	-	aTSS	0.0028136	0.43101	-0.4282	0.931	K2	0.9835
ENSG00000141298.17	SSH2	3	chr17:29930108-29930152	-	aTSS	0.45216	0.081345	0.37082	0.937	K3	0.889
ENSG00000176101.11	SSNA1	1	chr9:137188647-137188659	+	aTSS	0.0083906	0.19687	-0.18848	0.989	K2	1.2054
ENSG00000176101.11	SSNA1	2	chr9:137188660-137188698	+	aTSS	0.91518	0.73606	0.17912	0.928	K2	1.2054
ENSG00000173465.7	SSSCA1	8	chr11:65571769-65571770	+	APA	0.35144	0.0028212	0.34862	0.921	K2	0.9281
ENSG00000007341.18	ST7L	39	chr1:112525282-112525882	-	APA	0.0086048	0.15045	-0.14184	0.979	K2	1.3674
ENSG00000007341.18	ST7L	25	chr1:112583972-112584126	-	ES	0.93028	0.68941	0.24087	0.973	K5	3.3541
ENSG00000007341.18	ST7L	40	chr1:112523518-112525281	-	APA	0.9733	0.79008	0.18322	0.907	K2	1.3674
ENSG00000118007.12	STAG1	44	chr3:136336233-136336235	-	APA	0.35342	0.04705	0.30637	0.95	K2	1.2139
ENSG00000118007.12	STAG1	43	chr3:136336236-136337387	-	APA	0.12784	0.41195	-0.28411	0.911	K2	1.2139
ENSG00000178078.11	STAP2	4	chr19:4338652-4338821	-	aTSS	0.12821	0.29382	-0.16561	0.98	K1	0.9308
ENSG00000178078.11	STAP2	3	chr19:4338822-4338877	-	aTSS	0.87127	0.70389	0.16738	0.978	K1	0.9308
ENSG00000164211.12	STARD4	16	chr5:111499402-111499584	-	APA	0.23956	0.013206	0.22635	0.954	K3	1.9711
ENSG00000164211.12	STARD4	15	chr5:111499585-111499881	-	APA	0.011723	0.20046	-0.18874	0.928	K3	1.9711
ENSG00000084090.13	STARD7	15	chr2:96184867-96186749	-	APA	0.97759	0.8719	0.10569	0.971	K2	0.9044
ENSG00000040341.17	STAU2	32	chr8:73551830-73551895	-	APA	0.22043	0.11428	0.10614	1	K3	1.9892
ENSG00000123473.15	STIL	25	chr1:47263114-47263116	-	AA	0.15092	0.3295	-0.17858	0.954	K3	2.4025
ENSG00000123473.15	STIL	31	chr1:47250622-47251922	-	APA	0.57667	0.47462	0.10205	0.929	K2	1.1996
ENSG00000109689.15	STIM2	21	chr4:27022519-27022996	+	APA	0.17043	0.042714	0.12772	0.916	K2	1.7971
ENSG00000134602.15	STK26	19	chrX:132074462-132075943	+	APA	0.86518	0.97826	-0.11308	0.997	K2	0.9052
ENSG00000023734.10	STRAP	17	chr12:15903015-15903442	+	APA	0.40008	0.50933	-0.10925	0.975	K2	1.5588
ENSG00000196792.11	STRN3	18	chr14:30893799-30895344	-	APA	0.67259	0.80583	-0.13324	0.957	K1	0.9834
ENSG00000196792.11	STRN3	17	chr14:30895345-30895580	-	APA	0.32675	0.19399	0.13276	0.933	K1	0.9834
ENSG00000090372.14	STRN4	38	chr19:46719513-46720070	-	APA	0.95787	0.82706	0.13081	0.943	K2	0.9562
ENSG00000124222.22	STX16	18	chr20:58676329-58676486	+	APA	0.34689	0.23259	0.1143	0.991	K2	1.3522
ENSG00000198252.11	STYX	15	chr14:52774942-52774998	+	APA	0.2878	0.11342	0.17438	0.984	K1	0.9627
ENSG00000198252.11	STYX	14	chr14:52771033-52774941	+	APA	0.71163	0.8867	-0.17507	0.983	K1	0.9627
ENSG00000127952.16	STYXL1	4	chr7:76047964-76047980	-	aTSS	0.32518	0.53746	-0.21228	0.947	K3	0.986
ENSG00000127952.16	STYXL1	3	chr7:76047981-76047983	-	aTSS	0.67454	0.46348	0.21106	0.926	K3	0.986
ENSG00000136143.14	SUCLA2	15	chr13:47943361-47943445	-	APA	0.66177	0.54174	0.12003	0.912	K1	0.9998
ENSG00000136143.14	SUCLA2	16	chr13:47942656-47943360	-	APA	0.33875	0.45743	-0.11867	0.902	K1	0.9998
ENSG00000094975.13	SUCO	6	chr1:172533383-172533497	+	aTSS	0.62258	0.76824	-0.14566	0.974	K2	1.1614
ENSG00000094975.13	SUCO	9	chr1:172553260-172553370	+	ES	0.78729	0.68622	0.10107	0.947	K2	0.9415
ENSG00000094975.13	SUCO	4	chr1:172533183-172533216	+	aTSS	0.36336	0.23211	0.13125	0.947	K2	1.1614
ENSG00000137573.13	SULF1	33	chr8:69659409-69660051	+	APA	0.29466	0.0090276	0.28564	0.979	K3	1.8379
ENSG00000196502.11	SULT1A1	24	chr16:28605587-28605590	-	APA	0.71986	0.030056	0.68981	1	K3	1.2208
ENSG00000196502.11	SULT1A1	21	chr16:28605597-28605627	-	APA	0.021738	0.56734	-0.54561	0.986	K3	1.2208
ENSG00000116030.16	SUMO1	3	chr2:202238463-202238566	-	aTSS	0.67506	0.81002	-0.13496	0.912	K2	1.292
ENSG00000139531.12	SUOX	12	chr12:56005487-56005525	+	APA	0.14531	0.013748	0.13156	0.996	K1	0.7273
ENSG00000139531.12	SUOX	11	chr12:56003618-56005486	+	APA	0.85454	0.98644	-0.13189	0.991	K1	0.7273
ENSG00000092201.9	SUPT16H	2	chr14:21384011-21384013	-	aTSS	0.032773	0.364	-0.33123	0.992	K2	1.0575
ENSG00000092201.9	SUPT16H	3	chr14:21383982-21384010	-	aTSS	0.95335	0.62861	0.32475	0.987	K2	1.0575
ENSG00000102710.19	SUPT20H	37	chr13:37010552-37010655	-	ES	0.40717	0.28517	0.122	0.915	K2	1.1984
ENSG00000106868.16	SUSD1	21	chr9:112041079-112041492	-	APA	0.34043	0.059311	0.28112	0.988	K1	0.9722
ENSG00000106868.16	SUSD1	22	chr9:112040785-112041078	-	APA	0.66031	0.94019	-0.27988	0.982	K1	0.9722
ENSG00000169895.5	SYAP1	2	chrX:16719771-16719899	+	aTSS	0.83193	0.66119	0.17074	0.952	K1	0.9879
ENSG00000169895.5	SYAP1	1	chrX:16719632-16719770	+	aTSS	0.16929	0.33928	-0.16999	0.936	K1	0.9879
ENSG00000125755.18	SYMPK	30	chr19:45818913-45818954	-	APA	0.18779	0.74766	-0.55987	0.932	K1	0.9963
ENSG00000125755.18	SYMPK	29	chr19:45818955-45821383	-	APA	0.81251	0.25297	0.55954	0.931	K1	0.9963
ENSG00000103528.16	SYT17	16	chr16:19267129-19268334	+	APA	0.73088	0.97922	-0.24834	0.964	K2	0.9677
ENSG00000055208.18	TAB2	12	chr6:149409618-149411382	+	APA	0.24055	0.06428	0.17627	0.943	K2	0.8718
ENSG00000055208.18	TAB2	13	chr6:149411383-149411516	+	APA	0.75997	0.93577	-0.1758	0.931	K2	0.8718
ENSG00000147526.19	TACC1	40	chr8:38848133-38848276	+	APA	0.16882	0.0021793	0.16664	0.983	K3	1.4136
ENSG00000147526.19	TACC1	43	chr8:38848522-38850775	+	APA	0.044236	0.14653	-0.1023	0.929	K3	1.4136
ENSG00000136463.7	TACO1	2	chr17:63600882-63601363	+	aTSS	0.25514	0.1466	0.10854	0.908	K1	0.9008
ENSG00000136463.7	TACO1	1	chr17:63600872-63600881	+	aTSS	0.7453	0.85401	-0.10871	0.907	K1	0.9008
ENSG00000103168.16	TAF1C	36	chr16:84178749-84178780	-	APA	0.0011258	0.16513	-0.164	0.998	K3	2.0843
ENSG00000103168.16	TAF1C	7	chr16:84187012-84187020	-	aTSS	0.01065	0.24118	-0.23053	0.94	K4	1.8879
ENSG00000106290.14	TAF6	24	chr7:100107079-100107167	-	APA	0.47134	0.0052696	0.46607	0.961	K2	1.5643
ENSG00000177156.10	TALDO1	18	chr11:764948-765012	+	APA	0.34948	0.45008	-0.1006	0.97	K2	0.9993
ENSG00000177156.10	TALDO1	17	chr11:764813-764947	+	APA	0.65102	0.55053	0.10049	0.966	K2	0.9993
ENSG00000144559.10	TAMM41	4	chr3:11846865-11846881	-	aTSS	0.0075256	0.22104	-0.21352	0.991	K3	1.6994
ENSG00000135090.13	TAOK3	34	chr12:118149801-118150908	-	APA	0.67266	0.5159	0.15676	0.923	K2	1.4491
ENSG00000059588.9	TARBP1	38	chr1:234391378-234391597	-	APA	0.98559	0.74762	0.23797	1	K2	1.1439
ENSG00000059588.9	TARBP1	39	chr1:234391339-234391377	-	APA	0.014589	0.14427	-0.12968	0.995	K2	1.1439
ENSG00000065882.15	TBC1D1	2	chr4:37891099-37891348	+	aTSS	0.071784	0.86735	-0.79557	1	K1	0.7822
ENSG00000065882.15	TBC1D1	1	chr4:37891087-37891098	+	aTSS	0.92697	0.13227	0.79471	1	K1	0.7822
ENSG00000099992.15	TBC1D10A	1	chr22:30326948-30327046	-	aTSS	0.36597	0.64635	-0.28038	0.93	K2	0.9952
ENSG00000108239.8	TBC1D12	14	chr10:94533028-94533297	+	APA	0.24283	0.40022	-0.15738	0.972	K1	0.994
ENSG00000108239.8	TBC1D12	15	chr10:94533298-94535930	+	APA	0.75633	0.60122	0.15511	0.97	K1	0.994
ENSG00000107021.15	TBC1D13	14	chr9:128810425-128810432	+	APA	0.9622	0.60324	0.35896	0.996	K1	0.999
ENSG00000107021.15	TBC1D13	13	chr9:128807814-128810424	+	APA	0.037315	0.39651	-0.3592	0.986	K1	0.999
ENSG00000145348.16	TBCK	33	chr4:106046570-106046680	-	APA	0.31539	0.046519	0.26887	0.921	K3	1
ENSG00000145348.16	TBCK	34	chr4:106046095-106046569	-	APA	0.68537	0.95377	-0.2684	0.912	K3	1
ENSG00000198420.9	TCAF1	20	chr7:143851375-143853695	-	APA	0.82996	0.97588	-0.14592	0.983	K2	0.8257
ENSG00000198420.9	TCAF1	19	chr7:143853696-143853827	-	APA	0.17038	0.024021	0.14636	0.98	K2	0.8257
ENSG00000198420.9	TCAF1	4	chr7:143885210-143885271	-	AF	0.32045	0.14604	0.17441	0.945	K3	1.9646
ENSG00000179152.19	TCAIM	23	chr3:44407442-44407790	+	APA	0.19849	0.012321	0.18617	1	K2	1.3382
ENSG00000179152.19	TCAIM	25	chr3:44408875-44409451	+	APA	0.64154	0.79722	-0.15567	0.932	K2	1.3382
ENSG00000133142.17	TCEAL4	24	chrX:103587503-103587518	+	APA	0.13751	0.2543	-0.11679	0.928	K3	2.175
ENSG00000071564.14	TCF3	38	chr19:1609290-1609292	-	APA	0.018511	0.24965	-0.23114	0.967	K2	1.5421
ENSG00000148737.16	TCF7L2	32	chr10:113166161-113166309	+	APA	0.012448	0.21556	-0.20312	0.978	K3	1.5824
ENSG00000119977.20	TCTN3	2	chr10:95693924-95693926	-	aTSS	0.29332	0.49714	-0.20382	0.994	K3	1.5947
ENSG00000172171.10	TEFM	9	chr17:30898983-30898985	-	APA	0.024799	0.97778	-0.95298	1	K1	0.0036
ENSG00000172171.10	TEFM	8	chr17:30898986-30899606	-	APA	0.97499	0.021949	0.95304	1	K1	0.0036
ENSG00000121101.15	TEX14	9	chr17:58617538-58617619	-	ES	0.94969	0.83504	0.11465	0.904	K3	1.6987
ENSG00000136478.7	TEX2	2	chr17:64263168-64263227	-	aTSS	0.73348	0.97229	-0.23881	0.947	K1	0.9969
ENSG00000136478.7	TEX2	1	chr17:64263228-64263301	-	aTSS	0.26981	0.027637	0.24217	0.947	K1	0.9969
ENSG00000164081.12	TEX264	16	chr3:51703724-51704018	+	APA	0.1822	0.29592	-0.11372	0.942	K2	1.2974
ENSG00000100109.16	TFIP11	24	chr22:26491225-26491926	-	APA	0.6271	0.48676	0.14034	0.914	K1	0.9999
ENSG00000163235.15	TGFA	12	chr2:70450772-70450866	-	APA	0.76452	0.49072	0.2738	0.947	K2	1.418
ENSG00000230513.1	THAP7-AS1	3	chr22:21002208-21002829	+	aTSS	0.16566	0.038298	0.12737	0.91	K2	0.7318
ENSG00000151090.17	THRB	28	chr3:24118210-24122207	-	APA	0.76101	0.94236	-0.18135	0.98	K1	0.8622
ENSG00000151090.17	THRB	27	chr3:24122208-24123125	-	APA	0.23897	0.057871	0.1811	0.969	K1	0.8622
ENSG00000259431.5	THTPA	10	chr14:23558695-23558909	+	APA	0.028891	0.1571	-0.12821	0.993	K3	2.1029
ENSG00000138050.14	THUMPD2	4	chr2:39779114-39779152	-	aTSS	0.38154	0.64462	-0.26308	0.901	K2	0.9994
ENSG00000151923.17	TIAL1	26	chr10:119575437-119575791	-	APA	0.7642	0.55871	0.20549	0.994	K3	1.8246
ENSG00000075336.11	TIMM21	12	chr18:74158376-74158476	+	APA	0.3953	0.21178	0.18352	0.905	K2	1.0401
ENSG00000113845.9	TIMMDC1	3	chr3:119498552-119498816	+	aTSS	0.0029867	0.19547	-0.19249	1	K2	1.4223
ENSG00000113845.9	TIMMDC1	2	chr3:119498547-119498551	+	aTSS	0.69141	0.55626	0.13515	0.905	K2	1.4223
ENSG00000163659.12	TIPARP	12	chr3:156705121-156706750	+	APA	0.64307	0.82276	-0.17969	0.947	K2	1.1378
ENSG00000149476.15	TKFC	1	chr11:61333210-61333220	+	aTSS	0.53326	0.9738	-0.44053	0.946	K2	1.2101
ENSG00000149476.15	TKFC	2	chr11:61333221-61333221	+	aTSS	0.42593	0.025925	0.40001	0.945	K2	1.2101
ENSG00000065717.14	TLE2	17	chr19:3019464-3019466	-	AA	0.62512	0.4292	0.19592	0.921	K3	2.4391
ENSG00000140332.15	TLE3	47	chr15:70049799-70049800	-	APA	0.021398	0.24546	-0.22406	1	K3	2.5292
ENSG00000140332.15	TLE3	45	chr15:70049802-70050096	-	APA	0.16069	0.0026318	0.15806	0.998	K3	2.5292
ENSG00000106829.18	TLE4	10	chr9:79612656-79612718	+	ES	0.77898	0.94945	-0.17047	0.959	K2	1.3421
ENSG00000149809.14	TM7SF2	11	chr11:65112811-65112865	+	ES	0.87812	0.52609	0.35204	0.949	K4	1.7823
ENSG00000167608.11	TMC4	9	chr19:54168171-54168292	-	ES	0.88132	0.97952	-0.099995	0.966	K4	1.8326
ENSG00000170537.12	TMC7	23	chr16:19063182-19063942	+	APA	0.061375	0.54532	-0.48394	1	K1	0.9998
ENSG00000170537.12	TMC7	22	chr16:19061778-19063181	+	APA	0.93949	0.45705	0.48245	1	K1	0.9998
ENSG00000117500.12	TMED5	10	chr1:93151858-93154195	-	APA	0.49279	0.59408	-0.10129	0.93	K2	1.207
ENSG00000117500.12	TMED5	9	chr1:93154196-93154888	-	APA	0.47257	0.36307	0.1095	0.919	K2	1.207
ENSG00000110108.9	TMEM109	6	chr11:60923377-60923443	+	APA	0.72354	0.86914	-0.14559	0.932	K1	0.9476
ENSG00000110108.9	TMEM109	5	chr11:60921774-60923376	+	APA	0.27637	0.13071	0.14567	0.918	K1	0.9476
ENSG00000178307.9	TMEM11	8	chr17:21197958-21198255	-	APA	0.7277	0.91014	-0.18244	0.927	K2	1.064
ENSG00000172663.8	TMEM134	29	chr11:67464392-67464463	-	APA	0.10204	0.31548	-0.21344	0.967	K3	1.851
ENSG00000172663.8	TMEM134	2	chr11:67469244-67469250	-	aTSS	0.29548	0.97599	-0.68051	0.907	K3	0.6867
ENSG00000166575.16	TMEM135	24	chr11:87321360-87322350	+	APA	0.18206	0.39237	-0.21031	1	K2	1.5596
ENSG00000166575.16	TMEM135	25	chr11:87322351-87323758	+	APA	0.39394	0.57002	-0.17608	1	K2	1.5596
ENSG00000166575.16	TMEM135	23	chr11:87321201-87321359	+	APA	0.42665	0.039341	0.38731	1	K2	1.5596
ENSG00000166575.16	TMEM135	4	chr11:87037950-87038006	+	aTSS	0.13593	0.53225	-0.39632	0.992	K3	1.6683
ENSG00000161558.10	TMEM143	19	chr19:48332361-48333275	-	APA	0.86022	0.18173	0.67848	0.969	K2	1.0152
ENSG00000161558.10	TMEM143	21	chr19:48332356-48332356	-	APA	0.01618	0.12931	-0.11313	0.962	K2	1.0152
ENSG00000161558.10	TMEM143	20	chr19:48332357-48332360	-	APA	0.017317	0.53821	-0.52089	0.905	K2	1.0152
ENSG00000105677.11	TMEM147	1	chr19:35545595-35545629	+	aTSS	0.0066816	0.16622	-0.15954	0.953	K3	2.2653
ENSG00000011638.10	TMEM159	15	chr16:21180506-21180609	+	APA	0.15926	0.032919	0.12634	0.906	K3	1.4977
ENSG00000163449.10	TMEM169	8	chr2:216101066-216102382	+	APA	0.17857	0.028921	0.14965	0.989	K2	1.5104
ENSG00000151353.14	TMEM18	10	chr2:669189-669210	-	APA	0.1305	0.013842	0.11666	0.997	K2	1.2783
ENSG00000151353.14	TMEM18	9	chr2:669211-669675	-	APA	0.75291	0.86859	-0.11568	0.98	K2	1.2783
ENSG00000170417.15	TMEM182	10	chr2:102814748-102815104	+	APA	0.36704	0.15421	0.21282	0.919	K3	2.0894
ENSG00000170417.15	TMEM182	11	chr2:102815105-102816316	+	APA	0.17035	0.31992	-0.14957	0.906	K3	2.0894
ENSG00000240849.10	TMEM189	2	chr20:50151212-50151315	-	ES	0.66801	0.3829	0.2851	0.956	K3	1.0786
ENSG00000226287.8	TMEM191A	21	chr22:20704603-20704606	+	APA	0.9404	0.22245	0.71795	0.978	K2	0.9802
ENSG00000065600.12	TMEM206	8	chr1:212377562-212377706	-	ES	0.93559	0.82658	0.10901	0.904	K2	1.1692
ENSG00000119777.18	TMEM214	35	chr2:27041688-27041693	+	APA	0.0041974	0.21643	-0.21223	1	K2	0.8854
ENSG00000119777.18	TMEM214	34	chr2:27041244-27041687	+	APA	0.99576	0.77953	0.21623	1	K2	0.8854
ENSG00000168569.7	TMEM223	4	chr11:62791679-62791743	-	aTSS	0.16925	0.054851	0.1144	0.923	K2	1.1932
ENSG00000163900.10	TMEM41A	9	chr3:185490997-185491757	-	APA	0.11617	0.0022487	0.11393	0.998	K1	0.7347
ENSG00000163900.10	TMEM41A	10	chr3:185489601-185490996	-	APA	0.88343	0.99768	-0.11425	0.997	K1	0.7347
ENSG00000171729.13	TMEM51	11	chr1:15220409-15220480	+	APA	0.99299	0.89529	0.1	0.978	K2	0.6744
ENSG00000171729.13	TMEM51	10	chr1:15220394-15220408	+	APA	0.0072119	0.10496	-0.099995	0.973	K2	0.6744
ENSG00000196187.11	TMEM63A	30	chr1:225859663-225860723	-	APA	0.47456	0.78289	-0.30833	0.914	K1	0.9952
ENSG00000196187.11	TMEM63A	29	chr1:225860724-225860859	-	APA	0.52255	0.21722	0.30533	0.912	K1	0.9952
ENSG00000180089.5	TMEM86B	7	chr19:55226751-55227563	-	APA	0.036057	0.43838	-0.40232	0.928	K2	0.9866
ENSG00000137747.15	TMPRSS13	1	chr11:117929398-117929459	-	aTSS	0.038535	0.2874	-0.24887	0.931	K3	1.7459
ENSG00000184012.11	TMPRSS2	24	chr21:41466009-41466153	-	APA	0.090386	0.28147	-0.19109	0.975	K2	1.656
ENSG00000184012.11	TMPRSS2	25	chr21:41465890-41466008	-	APA	0.15486	0.053988	0.10087	0.929	K2	1.656
ENSG00000139324.11	TMTC3	3	chr12:88153291-88153509	+	ES	0.81189	0.92186	-0.10997	0.927	K4	1.2632
ENSG00000125247.15	TMTC4	30	chr13:100603934-100604870	-	APA	0.80151	0.36755	0.43396	0.917	K2	1.0001
ENSG00000168591.15	TMUB2	19	chr17:44189300-44189410	+	RI	0.85687	0.96487	-0.108	0.973	K3	1.1398
ENSG00000168591.15	TMUB2	26	chr17:44191699-44191712	+	APA	0.48158	0.18569	0.29589	0.903	K3	1.9878
ENSG00000213593.9	TMX2	14	chr11:57740099-57740369	+	APA	0.099623	0.001176	0.1	1	K2	0.5918
ENSG00000006327.13	TNFRSF12A	2	chr16:3020359-3020367	+	aTSS	0.94941	0.78608	0.16333	0.942	K3	1.1769
ENSG00000006327.13	TNFRSF12A	3	chr16:3020368-3020374	+	aTSS	0.051182	0.16416	-0.11298	0.919	K3	1.1769
ENSG00000090905.18	TNRC6A	8	chr16:24791690-24791817	+	aTSS	0.72989	0.97051	-0.24061	0.945	K1	0.9888
ENSG00000090905.18	TNRC6A	7	chr16:24791487-24791689	+	aTSS	0.27214	0.029222	0.24292	0.941	K1	0.9888
ENSG00000100284.20	TOM1	2	chr22:35299804-35299855	+	aTSS	0.03543	0.33439	-0.29896	0.937	K2	1.4548
ENSG00000175662.17	TOM1L2	28	chr17:17847349-17847445	-	APA	0.39335	0.26027	0.13308	0.982	K3	1.816
ENSG00000175768.12	TOMM5	3	chr9:37592597-37592597	-	aTSS	0.68918	0.53278	0.1564	0.944	K3	1.2019
ENSG00000175768.12	TOMM5	4	chr9:37592470-37592596	-	aTSS	0.29666	0.43531	-0.13864	0.927	K3	1.2019
ENSG00000177302.14	TOP3A	5	chr17:18314599-18314703	-	aTSS	0.014498	0.16027	-0.14577	1	K3	1.9039
ENSG00000092203.13	TOX4	16	chr14:21492607-21492812	+	APA	0.50174	0.63995	-0.13821	0.979	K1	1
ENSG00000092203.13	TOX4	15	chr14:21492508-21492606	+	APA	0.4986	0.35993	0.13867	0.977	K1	1
ENSG00000143514.16	TP53BP2	27	chr1:223780789-223780894	-	APA	0.0065117	0.11976	-0.11325	0.995	K2	1.4748
ENSG00000175274.18	TP53I11	7	chr11:44941003-44941077	-	ES	0.22558	0.053461	0.17212	0.945	K3	1.4341
ENSG00000078900.14	TP73	23	chr1:3733293-3733367	+	APA	0.37452	0.12274	0.25178	0.919	K2	1.5841
ENSG00000078900.14	TP73	21	chr1:3732747-3733091	+	APA	0.017712	0.36856	-0.35084	0.904	K2	1.5841
ENSG00000140416.19	TPM1	47	chr15:63071324-63071884	+	APA	0.14175	0.29582	-0.15407	1	K3	1.9551
ENSG00000140416.19	TPM1	48	chr15:63071885-63071889	+	APA	0.28041	0.1354	0.14502	1	K3	1.9551
ENSG00000140416.19	TPM1	14	chr15:63048537-63048561	+	aTSS	0.011643	0.13267	-0.12103	0.962	K2	1.3567
ENSG00000140416.19	TPM1	15	chr15:63048562-63048575	+	aTSS	0.79621	0.66925	0.12697	0.916	K2	1.3567
ENSG00000102871.15	TRADD	14	chr16:67154199-67154832	-	APA	0.79809	0.62594	0.17215	0.907	K2	1.1388
ENSG00000113597.17	TRAPPC13	25	chr5:65664504-65664764	+	APA	0.47076	0.004783	0.46598	0.961	K2	1.0549
ENSG00000213689.11	TREX1	14	chr3:48467644-48467645	+	APA	0.021966	0.78662	-0.76465	1	K2	1.0859
ENSG00000213689.11	TREX1	13	chr3:48467601-48467643	+	APA	0.57836	0.021078	0.55728	1	K2	1.0859
ENSG00000173334.3	TRIB1	7	chr8:125436929-125437191	+	APA	0.14478	0.25432	-0.10954	0.953	K2	1.114
ENSG00000109654.14	TRIM2	23	chr4:153336363-153339320	+	APA	0.82547	0.94791	-0.12244	0.954	K1	0.7457
ENSG00000109654.14	TRIM2	22	chr4:153334814-153336362	+	APA	0.17334	0.051831	0.12151	0.941	K1	0.7457
ENSG00000104228.12	TRIM35	3	chr8:27310801-27310856	-	aTSS	0.70373	0.21766	0.48607	0.956	K2	0.9696
ENSG00000146063.19	TRIM41	20	chr5:181235804-181235806	+	APA	0.0077709	0.39704	-0.38927	0.976	K3	1.0724
ENSG00000146063.19	TRIM41	19	chr5:181235354-181235803	+	APA	0.9927	0.59463	0.39807	0.974	K3	1.0724
ENSG00000132256.18	TRIM5	19	chr11:5663564-5663616	-	APA	0.24656	0.058173	0.18839	0.928	K2	0.9851
ENSG00000205133.11	TRIQK	21	chr8:92885335-92885713	-	APA	0.0021234	0.15137	-0.14924	1	K3	2.4529
ENSG00000205133.11	TRIQK	22	chr8:92885320-92885334	-	APA	0.28202	0.077791	0.20423	0.98	K3	2.4529
ENSG00000205133.11	TRIQK	20	chr8:92885714-92886232	-	APA	0.13073	0.30151	-0.17078	0.974	K3	2.4529
ENSG00000205133.11	TRIQK	19	chr8:92886233-92886667	-	APA	0.17933	0.048948	0.13038	0.968	K3	2.4529
ENSG00000165275.9	TRMT10B	13	chr9:37777601-37777627	+	AA	0.92652	0.63929	0.28723	0.984	K1	0.9774
ENSG00000089195.14	TRMT6	4	chr20:5950278-5950477	-	aTSS	0.20483	0.039378	0.16546	0.9	K2	1.5195
ENSG00000144935.14	TRPC1	12	chr3:142791019-142791158	+	ES	0.92713	0.67297	0.25416	0.966	K2	1.175
ENSG00000092439.13	TRPM7	45	chr15:50561640-50561808	-	APA	0.19883	0.012045	0.18678	0.982	K2	0.9486
ENSG00000092439.13	TRPM7	46	chr15:50560293-50561639	-	APA	0.79562	0.98147	-0.18585	0.966	K2	0.9486
ENSG00000167723.14	TRPV3	29	chr17:3513821-3513845	-	APA	0.63202	0.12343	0.50859	0.975	K2	1.4431
ENSG00000167723.14	TRPV3	31	chr17:3510502-3513189	-	APA	0.31076	0.68927	-0.37851	0.925	K2	1.4431
ENSG00000103197.16	TSC2	62	chr16:2088446-2088692	+	APA	0.25705	0.01462	0.24243	0.952	K3	1.0016
ENSG00000103197.16	TSC2	63	chr16:2088693-2088700	+	APA	0.74342	0.98465	-0.24124	0.947	K3	1.0016
ENSG00000196428.12	TSC22D2	1	chr3:150408335-150411008	+	aTSS	0.0014461	0.11459	-0.11314	0.994	K2	1.4413
ENSG00000166925.8	TSC22D4	11	chr7:100466523-100466537	-	APA	0.035333	0.15816	-0.12283	0.949	K2	0.7675
ENSG00000166925.8	TSC22D4	10	chr7:100466538-100467168	-	APA	0.96474	0.8419	0.12284	0.944	K2	0.7675
ENSG00000182173.12	TSEN54	16	chr17:75524421-75524733	+	APA	0.071463	0.21935	-0.14789	0.913	K2	0.8679
ENSG00000168785.7	TSPAN5	13	chr4:98472210-98472344	-	APA	0.28526	0.10806	0.1772	0.94	K2	0.9406
ENSG00000168785.7	TSPAN5	14	chr4:98470367-98472209	-	APA	0.7157	0.8916	-0.1759	0.939	K2	0.9406
ENSG00000265148.5	TSPOAP1-AS1	17	chr17:58352492-58353286	+	APA	0.21755	0.046547	0.171	0.931	K3	1.7512
ENSG00000068724.15	TTC7A	33	chr2:47073924-47074048	+	APA	0.049734	0.22279	-0.17306	0.913	K3	1.8963
ENSG00000214021.15	TTLL3	19	chr3:9820349-9820545	+	aTSS	0.7274	0.98723	-0.25983	1	K2	0.9413
ENSG00000214021.15	TTLL3	18	chr3:9820294-9820348	+	aTSS	0.20321	0.012676	0.19054	0.979	K2	0.9413
ENSG00000214021.15	TTLL3	41	chr3:9835097-9835332	+	APA	0.40838	0.023971	0.38441	0.957	K3	1.7205
ENSG00000135912.10	TTLL4	35	chr2:218754231-218754503	+	APA	0.14146	0.012452	0.12901	0.966	K2	1.4346
ENSG00000176014.12	TUBB6	18	chr18:12325915-12326563	+	APA	0.74513	0.8627	-0.11757	0.986	K3	1.0637
ENSG00000176014.12	TUBB6	5	chr18:12308244-12308262	+	aTSS	0.56838	0.31098	0.2574	0.921	K3	1.5823
ENSG00000253352.8	TUG1	19	chr22:30976064-30976081	+	APA	0.047005	0.16083	-0.11382	1	K2	1.2099
ENSG00000253352.8	TUG1	18	chr22:30975480-30976063	+	APA	0.11461	0.0024333	0.11218	1	K2	1.2099
ENSG00000151239.13	TWF1	20	chr12:43793725-43795492	-	APA	0.34337	0.47247	-0.1291	0.911	K2	1.5821
ENSG00000129235.10	TXNDC17	17	chr17:6642951-6643067	+	APA	0.014146	0.11147	-0.099995	0.949	K3	0.8759
ENSG00000105397.13	TYK2	34	chr19:10350533-10350852	-	APA	0.21899	0.089822	0.12917	0.95	K2	1.4745
ENSG00000162971.10	TYW5	6	chr2:199948318-199948336	-	AD	0.54305	0.2603	0.28274	0.919	K3	1.9674
ENSG00000160201.11	U2AF1	10	chr21:43100453-43100519	-	ES	0.75312	0.9156	-0.16248	0.994	K4	1.9314
ENSG00000160201.11	U2AF1	8	chr21:43101366-43101432	-	ES	0.38774	0.27298	0.11476	0.904	K4	1.9314
ENSG00000161265.14	U2AF1L4	10	chr19:35745125-35745187	-	ES	0.70107	0.91533	-0.21426	0.938	K4	3.8738
ENSG00000144744.16	UBA3	7	chr3:69080112-69080153	-	ES	0.85813	0.70427	0.15386	0.957	K1	0.87
ENSG00000182179.12	UBA7	47	chr3:49805207-49805223	-	APA	0.79109	0.18824	0.60284	0.965	K1	1
ENSG00000182179.12	UBA7	46	chr3:49805224-49805437	-	APA	0.20697	0.80737	-0.6004	0.954	K1	1
ENSG00000134882.15	UBAC2	22	chr13:99386428-99386434	+	APA	0.0018161	0.13676	-0.13495	0.989	K3	1.837
ENSG00000143569.18	UBAP2L	39	chr1:154263103-154263322	+	APA	0.01809	0.15154	-0.13345	0.998	K1	0.6625
ENSG00000143569.18	UBAP2L	40	chr1:154263323-154263505	+	APA	0.98182	0.84815	0.13367	0.997	K1	0.6625
ENSG00000077721.15	UBE2A	14	chrX:119583418-119583621	+	APA	0.18737	0.08674	0.10063	0.968	K3	1.6218
ENSG00000072401.14	UBE2D1	10	chr10:58368720-58369043	+	APA	0.40403	0.28736	0.11667	0.945	K2	1.2454
ENSG00000072401.14	UBE2D1	11	chr10:58369044-58369595	+	APA	0.55679	0.66191	-0.10512	0.937	K2	1.2454
ENSG00000170142.11	UBE2E1	13	chr3:23891315-23891316	+	APA	0.29364	0.19485	0.1	0.951	K1	0.9115
ENSG00000170142.11	UBE2E1	12	chr3:23890509-23891314	+	APA	0.70634	0.8052	-0.099995	0.95	K1	0.9115
ENSG00000186591.11	UBE2H	9	chr7:129834978-129835061	-	APA	0.00039021	0.10999	-0.1096	0.999	K2	1.3921
ENSG00000130725.7	UBE2M	2	chr19:58558694-58558954	-	aTSS	0.55939	0.99207	-0.43268	0.983	K1	0.864
ENSG00000130725.7	UBE2M	1	chr19:58558955-58558960	-	aTSS	0.44024	0.0078096	0.43243	0.983	K1	0.864
ENSG00000151148.13	UBE3B	5	chr12:109477642-109477651	+	aTSS	0.17924	0.4636	-0.28436	0.957	K3	1.7272
ENSG00000151148.13	UBE3B	6	chr12:109477652-109477652	+	aTSS	0.15186	0.32958	-0.17772	0.907	K3	1.7272
ENSG00000110344.9	UBE4A	25	chr11:118399208-118399211	+	APA	0.038732	0.19372	-0.15499	0.954	K2	1.3943
ENSG00000130939.18	UBE4B	1	chr1:10032832-10033595	+	aTSS	0.44765	0.3031	0.14455	0.942	K1	1
ENSG00000130939.18	UBE4B	2	chr1:10033596-10033694	+	aTSS	0.55351	0.69618	-0.14267	0.934	K1	1
ENSG00000104517.12	UBR5	63	chr8:102253946-102254514	-	APA	0.32807	0.20626	0.12181	0.929	K2	1.5799
ENSG00000104517.12	UBR5	64	chr8:102253736-102253945	-	APA	0.35447	0.4691	-0.11463	0.902	K2	1.5799
ENSG00000167671.11	UBXN6	24	chr19:4445007-4445009	-	APA	0.5425	0.0047067	0.53779	0.936	K2	1.0468
ENSG00000143179.14	UCK2	11	chr1:165907872-165908100	+	APA	0.40218	0.54215	-0.13997	0.986	K2	1.9668
ENSG00000109775.10	UFSP2	15	chr4:185400315-185400478	-	APA	0.044341	0.59286	-0.54852	1	K2	0.9999
ENSG00000109775.10	UFSP2	16	chr4:185400289-185400314	-	APA	0.431	0.045249	0.38575	0.972	K2	0.9999
ENSG00000198722.14	UNC13B	47	chr9:35405335-35405338	+	APA	0.45257	0.020833	0.43174	0.948	K2	0.9854
ENSG00000092929.11	UNC13D	41	chr17:75827225-75827263	-	APA	0.49971	0.22812	0.27159	0.925	K1	0.9888
ENSG00000110057.7	UNC93B1	1	chr11:68004108-68004123	-	aTSS	0.50331	0.21653	0.28678	0.977	K2	1.4787
ENSG00000169062.14	UPF3A	3	chr13:114281628-114281636	+	aTSS	0.061501	0.34035	-0.27885	0.901	K2	0.9997
ENSG00000243566.6	UPK3B	8	chr7:76513084-76513163	+	ES	0.29841	0.49448	-0.19607	0.906	K2	1.2062
ENSG00000105698.15	USF2	18	chr19:35278215-35278697	+	aTSS	0.96175	0.75968	0.20208	0.907	K1	0.9824
ENSG00000105698.15	USF2	17	chr19:35276977-35278214	+	aTSS	0.038914	0.23966	-0.20074	0.902	K1	0.9824
ENSG00000101557.14	USP14	19	chr18:211133-211350	+	APA	0.41346	0.51002	-0.099995	0.998	K2	1.5147
ENSG00000172046.18	USP19	39	chr3:49108131-49108528	-	APA	0.64165	0.82516	-0.18351	0.949	K2	0.9997
ENSG00000172046.18	USP19	40	chr3:49108050-49108130	-	APA	0.35818	0.17458	0.1836	0.94	K2	0.9997
ENSG00000143258.15	USP21	27	chr1:161165357-161165714	+	APA	0.20652	0.97057	-0.76405	1	K1	0.9676
ENSG00000143258.15	USP21	28	chr1:161165715-161165723	+	APA	0.79474	0.031564	0.76318	1	K1	0.9676
ENSG00000140455.16	USP3	28	chr15:63591054-63591444	+	APA	0.18957	0.015104	0.17446	1	K3	2.1683
ENSG00000140455.16	USP3	29	chr15:63591445-63591467	+	APA	0.27871	0.44928	-0.17058	0.916	K3	2.1683
ENSG00000259248.5	USP3-AS1	12	chr15:63587934-63588828	-	APA	0.53851	0.023505	0.515	0.907	K2	0.9916
ENSG00000170832.12	USP32	45	chr17:60179105-60179428	-	APA	0.61875	0.49411	0.12465	0.959	K1	0.9991
ENSG00000170832.12	USP32	46	chr17:60179094-60179104	-	APA	0.38124	0.50617	-0.12493	0.942	K1	0.9991
ENSG00000233327.10	USP32P2	2	chr17:18519675-18520806	-	aTSS	0.093561	0.5367	-0.44314	0.98	K2	1.3743
ENSG00000135913.10	USP37	3	chr2:218568326-218568326	-	aTSS	0.48594	0.082392	0.40355	0.987	K3	0.9728
ENSG00000135913.10	USP37	34	chr2:218453501-218454814	-	APA	0.20605	0.050762	0.15529	0.918	K2	1.8444
ENSG00000114316.12	USP4	30	chr3:49278106-49278142	-	APA	0.16759	0.0052082	0.16238	0.99	K2	1.5457
ENSG00000085982.13	USP40	45	chr2:233477392-233477503	-	APA	0.4513	0.26426	0.18704	0.957	K2	1.0353
ENSG00000085982.13	USP40	46	chr2:233475526-233477391	-	APA	0.54304	0.72996	-0.18692	0.95	K2	1.0353
ENSG00000164338.9	UTP15	17	chr5:73579877-73580199	+	APA	0.23087	0.066147	0.16472	0.94	K2	1.8457
ENSG00000120800.4	UTP20	1	chr12:101280109-101280127	+	aTSS	0.45951	0.026001	0.43351	0.976	K1	0.9513
ENSG00000120800.4	UTP20	2	chr12:101280128-101280327	+	aTSS	0.54038	0.97353	-0.43316	0.966	K1	0.9513
ENSG00000163945.16	UVSSA	24	chr4:1386259-1386412	+	APA	0.0098895	0.19875	-0.18886	0.973	K3	0.9997
ENSG00000163945.16	UVSSA	26	chr4:1386415-1388049	+	APA	0.47615	0.66336	-0.1872	0.941	K3	0.9997
ENSG00000163945.16	UVSSA	25	chr4:1386413-1386414	+	APA	0.52364	0.14559	0.37805	0.933	K3	0.9997
ENSG00000071246.10	VASH1	1	chr14:76762189-76762328	+	aTSS	0.038946	0.51165	-0.4727	0.909	K1	0.9363
ENSG00000071246.10	VASH1	2	chr14:76762329-76763130	+	aTSS	0.96075	0.48463	0.47612	0.9	K1	0.9363
ENSG00000143494.15	VASH2	20	chr1:212988585-212988924	+	APA	0.20683	0.012973	0.19386	0.969	K2	1.5788
ENSG00000100483.13	VCPKMT	14	chr14:50108633-50108641	-	APA	0.71786	0.35958	0.35828	0.979	K2	1.7042
ENSG00000100483.13	VCPKMT	12	chr14:50109537-50109713	-	APA	0.065621	0.19448	-0.12886	0.97	K2	1.7042
ENSG00000100483.13	VCPKMT	13	chr14:50108642-50109536	-	APA	0.054149	0.36565	-0.3115	0.959	K2	1.7042
ENSG00000167397.14	VKORC1	3	chr16:31094941-31094956	-	aTSS	0.24448	0.1461	0.1	0.913	K2	1.2642
ENSG00000147852.15	VLDLR	2	chr9:2622100-2622271	+	aTSS	0.40567	0.88139	-0.47572	0.995	K1	0.9996
ENSG00000147852.15	VLDLR	1	chr9:2621834-2622099	+	aTSS	0.59683	0.11586	0.48097	0.993	K1	0.9996
ENSG00000167987.10	VPS37C	11	chr11:61130256-61132443	-	APA	0.57055	0.7304	-0.15985	0.903	K1	0.9959
ENSG00000167987.10	VPS37C	10	chr11:61132444-61132539	-	APA	0.42972	0.26968	0.16004	0.9	K1	0.9959
ENSG00000136631.12	VPS45	35	chr1:150144926-150145288	+	APA	0.20303	0.039502	0.16353	0.974	K2	1.0812
ENSG00000136631.12	VPS45	36	chr1:150145289-150145327	+	APA	0.76968	0.92933	-0.15965	0.95	K2	1.0812
ENSG00000156931.15	VPS8	59	chr3:185052312-185052604	+	APA	0.44669	0.95147	-0.50478	0.904	K2	1.4761
ENSG00000176834.13	VSIG10	6	chr12:118103949-118103990	-	aTSS	0.80944	0.51768	0.29176	0.987	K3	1.4696
ENSG00000116874.11	WARS2	1	chr1:119140655-119140671	-	aTSS	0.51082	0.051653	0.45917	1	K2	1.3649
ENSG00000116874.11	WARS2	2	chr1:119140649-119140654	-	aTSS	0.44701	0.79196	-0.34494	0.932	K2	1.3649
ENSG00000172661.17	WASHC2C	35	chr10:45792261-45792601	+	APA	0.018647	0.14277	-0.12412	0.918	K2	1.5588
ENSG00000163625.15	WDFY3	17	chr4:84808334-84808417	-	ES	0.42547	0.20795	0.21752	0.931	K1	0.9898
ENSG00000101940.17	WDR13	4	chrX:48597521-48597614	+	aTSS	0.42454	0.15802	0.26652	0.945	K2	1.0448
ENSG00000150627.15	WDR17	35	chr4:176179770-176180159	+	APA	0.3743	0.19432	0.17998	0.911	K2	1.5335
ENSG00000140153.17	WDR20	6	chr14:102139924-102140172	+	aTSS	0.11619	0.01606	0.10013	0.93	K3	1.7645
ENSG00000148225.15	WDR31	15	chr9:113315684-113316909	-	APA	0.055114	0.29446	-0.23934	0.9	K2	0.9995
ENSG00000136709.11	WDR33	2	chr2:127811012-127811147	-	aTSS	0.71822	0.94981	-0.23159	0.978	K1	0.9593
ENSG00000136709.11	WDR33	1	chr2:127811148-127811171	-	aTSS	0.2783	0.050999	0.2273	0.97	K1	0.9593
ENSG00000134987.11	WDR36	2	chr5:111092172-111092313	+	aTSS	0.39468	0.92992	-0.53524	0.998	K2	0.9737
ENSG00000134987.11	WDR36	1	chr5:111091716-111092171	+	aTSS	0.60304	0.070058	0.53298	0.996	K2	0.9737
ENSG00000131725.13	WDR44	4	chrX:118378419-118378452	+	ES	0.77465	0.95103	-0.17637	0.976	K2	1.2915
ENSG00000075702.16	WDR62	11	chr19:36071556-36071716	+	ES	0.85837	0.95891	-0.10053	0.901	K3	1.2416
ENSG00000177082.12	WDR73	31	chr15:84643055-84643081	-	APA	0.45419	0.6668	-0.21261	0.908	K3	1.9932
ENSG00000109501.13	WFS1	13	chr4:6300657-6300807	+	APA	0.00078396	0.12609	-0.12531	0.997	K2	1.2796
ENSG00000109501.13	WFS1	14	chr4:6300808-6302883	+	APA	0.28567	0.10591	0.17976	0.956	K2	1.2796
ENSG00000115935.17	WIPF1	2	chr2:174682884-174682899	-	aTSS	0.029778	0.14558	-0.1158	0.907	K2	1.5363
ENSG00000171475.13	WIPF2	8	chr17:40260628-40260667	+	AD	0.8505	0.95142	-0.10093	0.92	K3	1.3431
ENSG00000157954.14	WIPI2	26	chr7:5230835-5230947	+	APA	0.1339	0.0012369	0.13267	0.994	K3	2.0895
ENSG00000182093.14	WRB	5	chr21:39387765-39387790	+	aTSS	0.38019	0.69327	-0.31308	0.921	K1	0.9586
ENSG00000182093.14	WRB	6	chr21:39387791-39387855	+	aTSS	0.61989	0.30692	0.31298	0.918	K1	0.9586
ENSG00000132530.16	XAF1	16	chr17:6774109-6775647	+	APA	0.8369	0.72557	0.11132	0.993	K2	1.1899
ENSG00000171044.10	XKR6	7	chr8:10896045-10896522	-	APA	0.35842	0.7884	-0.42997	0.926	K1	0.9998
ENSG00000171044.10	XKR6	6	chr8:10896523-10898916	-	APA	0.63897	0.20979	0.42918	0.909	K1	0.9998
ENSG00000167645.16	YIF1B	25	chr19:38305362-38305507	-	APA	0.19848	0.4183	-0.21982	0.967	K3	1.5021
ENSG00000137207.11	YIPF3	27	chr6:43512220-43512315	-	APA	0.0328	0.13776	-0.10496	0.91	K2	1.5193
ENSG00000198492.15	YTHDF2	13	chr1:28768929-28769125	+	APA	0.0014676	0.1294	-0.12794	1	K1	0.6222
ENSG00000198492.15	YTHDF2	14	chr1:28769126-28769775	+	APA	0.99856	0.87043	0.12812	1	K1	0.6222
ENSG00000116809.11	ZBTB17	2	chr1:15976105-15976126	-	aTSS	0.79646	0.95636	-0.1599	0.974	K2	0.997
ENSG00000171448.8	ZBTB26	3	chr9:122918100-122919944	-	APA	0.1824	0.082887	0.1	0.946	K1	0.7231
ENSG00000171448.8	ZBTB26	4	chr9:122915566-122918099	-	APA	0.81698	0.91648	-0.099995	0.935	K1	0.7231
ENSG00000169155.9	ZBTB43	5	chr9:126836220-126836412	+	APA	0.13524	0.0066935	0.12855	0.994	K2	0.9608
ENSG00000149289.10	ZC3H12C	8	chr11:110164341-110165934	+	APA	0.18971	0.46794	-0.27823	0.943	K2	1.5707
ENSG00000155329.11	ZCCHC10	16	chr5:132996996-132998099	-	APA	0.0034163	0.13632	-0.13291	0.987	K3	2.2508
ENSG00000147905.17	ZCCHC7	23	chr9:37356981-37357159	+	APA	0.15977	0.0047499	0.15502	0.987	K3	1.4768
ENSG00000033030.13	ZCCHC8	24	chr12:122472893-122472898	-	APA	0.0033691	0.48257	-0.4792	1	K3	1.6449
ENSG00000033030.13	ZCCHC8	23	chr12:122472899-122473939	-	APA	0.81068	0.35333	0.45735	0.993	K3	1.6449
ENSG00000131732.11	ZCCHC9	18	chr5:81312615-81312662	+	APA	0.22584	0.44957	-0.22373	0.954	K3	1.9292
ENSG00000131732.11	ZCCHC9	17	chr5:81312544-81312614	+	APA	0.48463	0.12493	0.3597	0.94	K3	1.9292
ENSG00000160446.18	ZDHHC12	2	chr9:128724110-128724121	-	aTSS	0.77964	0.65253	0.1271	0.931	K2	1.3738
[truncated: 86 more rows]

## Sheet: All_differentiall_spliced_genes
Gene stable ID version	Gene name	Gene type	Gene description
ENSG00000001461.16	NIPAL3	protein_coding	NIPA like domain containing 3 [Source:HGNC Symbol;Acc:HGNC:25233]
ENSG00000001631.15	KRIT1	protein_coding	KRIT1, ankyrin repeat containing [Source:HGNC Symbol;Acc:HGNC:1573]
ENSG00000002330.13	BAD	protein_coding	BCL2 associated agonist of cell death [Source:HGNC Symbol;Acc:HGNC:936]
ENSG00000002834.17	LASP1	protein_coding	LIM and SH3 protein 1 [Source:HGNC Symbol;Acc:HGNC:6513]
ENSG00000002919.14	SNX11	protein_coding	sorting nexin 11 [Source:HGNC Symbol;Acc:HGNC:14975]
ENSG00000003096.14	KLHL13	protein_coding	kelch like family member 13 [Source:HGNC Symbol;Acc:HGNC:22931]
ENSG00000003402.19	CFLAR	protein_coding	CASP8 and FADD like apoptosis regulator [Source:HGNC Symbol;Acc:HGNC:1876]
ENSG00000004139.13	SARM1	protein_coding	sterile alpha and TIR motif containing 1 [Source:HGNC Symbol;Acc:HGNC:17074]
ENSG00000004399.12	PLXND1	protein_coding	plexin D1 [Source:HGNC Symbol;Acc:HGNC:9107]
ENSG00000004455.16	AK2	protein_coding	adenylate kinase 2 [Source:HGNC Symbol;Acc:HGNC:362]
ENSG00000004779.9	NDUFAB1	protein_coding	NADH:ubiquinone oxidoreductase subunit AB1 [Source:HGNC Symbol;Acc:HGNC:7694]
ENSG00000004975.11	DVL2	protein_coding	dishevelled segment polarity protein 2 [Source:HGNC Symbol;Acc:HGNC:3086]
ENSG00000005100.12	DHX33	protein_coding	DEAH-box helicase 33 [Source:HGNC Symbol;Acc:HGNC:16718]
ENSG00000005486.16	RHBDD2	protein_coding	rhomboid domain containing 2 [Source:HGNC Symbol;Acc:HGNC:23082]
ENSG00000005884.17	ITGA3	protein_coding	integrin subunit alpha 3 [Source:HGNC Symbol;Acc:HGNC:6139]
ENSG00000006194.9	ZNF263	protein_coding	zinc finger protein 263 [Source:HGNC Symbol;Acc:HGNC:13056]
ENSG00000006327.13	TNFRSF12A	protein_coding	TNF receptor superfamily member 12A [Source:HGNC Symbol;Acc:HGNC:18152]
ENSG00000006432.15	MAP3K9	protein_coding	mitogen-activated protein kinase kinase kinase 9 [Source:HGNC Symbol;Acc:HGNC:6861]
ENSG00000006459.10	KDM7A	protein_coding	lysine demethylase 7A [Source:HGNC Symbol;Acc:HGNC:22224]
ENSG00000006634.7	DBF4	protein_coding	DBF4 zinc finger [Source:HGNC Symbol;Acc:HGNC:17364]
ENSG00000007047.14	MARK4	protein_coding	microtubule affinity regulating kinase 4 [Source:HGNC Symbol;Acc:HGNC:13538]
ENSG00000007341.18	ST7L	protein_coding	suppression of tumorigenicity 7 like [Source:HGNC Symbol;Acc:HGNC:18441]
ENSG00000007392.16	LUC7L	protein_coding	LUC7 like [Source:HGNC Symbol;Acc:HGNC:6723]
ENSG00000007402.11	CACNA2D2	protein_coding	calcium voltage-gated channel auxiliary subunit alpha2delta 2 [Source:HGNC Symbol;Acc:HGNC:1400]
ENSG00000008382.15	MPND	protein_coding	MPN domain containing [Source:HGNC Symbol;Acc:HGNC:25934]
ENSG00000008838.19	MED24	protein_coding	mediator complex subunit 24 [Source:HGNC Symbol;Acc:HGNC:22963]
ENSG00000010072.15	SPRTN	protein_coding	SprT-like N-terminal domain [Source:HGNC Symbol;Acc:HGNC:25356]
ENSG00000010539.11	ZNF200	protein_coding	zinc finger protein 200 [Source:HGNC Symbol;Acc:HGNC:12993]
ENSG00000010626.14	LRRC23	protein_coding	leucine rich repeat containing 23 [Source:HGNC Symbol;Acc:HGNC:19138]
ENSG00000011638.10	TMEM159	protein_coding	transmembrane protein 159 [Source:HGNC Symbol;Acc:HGNC:30136]
ENSG00000012048.20	BRCA1	protein_coding	BRCA1, DNA repair associated [Source:HGNC Symbol;Acc:HGNC:1100]
ENSG00000012822.15	CALCOCO1	protein_coding	calcium binding and coiled-coil domain 1 [Source:HGNC Symbol;Acc:HGNC:29306]
ENSG00000013306.15	SLC25A39	protein_coding	solute carrier family 25 member 39 [Source:HGNC Symbol;Acc:HGNC:24279]
ENSG00000015171.19	ZMYND11	protein_coding	zinc finger MYND-type containing 11 [Source:HGNC Symbol;Acc:HGNC:16966]
ENSG00000019582.14	CD74	protein_coding	CD74 molecule [Source:HGNC Symbol;Acc:HGNC:1697]
ENSG00000023734.10	STRAP	protein_coding	serine/threonine kinase receptor associated protein [Source:HGNC Symbol;Acc:HGNC:30796]
ENSG00000023909.9	GCLM	protein_coding	glutamate-cysteine ligase modifier subunit [Source:HGNC Symbol;Acc:HGNC:4312]
ENSG00000025423.11	HSD17B6	protein_coding	hydroxysteroid 17-beta dehydrogenase 6 [Source:HGNC Symbol;Acc:HGNC:23316]
ENSG00000026036.21	RTEL1-TNFRSF6B	protein_coding	RTEL1-TNFRSF6B readthrough (NMD candidate) [Source:HGNC Symbol;Acc:HGNC:44095]
ENSG00000026103.21	FAS	protein_coding	Fas cell surface death receptor [Source:HGNC Symbol;Acc:HGNC:11920]
ENSG00000029725.16	RABEP1	protein_coding	rabaptin, RAB GTPase binding effector protein 1 [Source:HGNC Symbol;Acc:HGNC:17677]
ENSG00000031003.10	FAM13B	protein_coding	family with sequence similarity 13 member B [Source:HGNC Symbol;Acc:HGNC:1335]
ENSG00000032444.15	PNPLA6	protein_coding	patatin like phospholipase domain containing 6 [Source:HGNC Symbol;Acc:HGNC:16268]
ENSG00000033030.13	ZCCHC8	protein_coding	zinc finger CCHC-type containing 8 [Source:HGNC Symbol;Acc:HGNC:25265]
ENSG00000033867.16	SLC4A7	protein_coding	solute carrier family 4 member 7 [Source:HGNC Symbol;Acc:HGNC:11033]
ENSG00000039123.15	SKIV2L2	protein_coding	Ski2 like RNA helicase 2 [Source:HGNC Symbol;Acc:HGNC:18734]
ENSG00000039319.16	ZFYVE16	protein_coding	zinc finger FYVE-type containing 16 [Source:HGNC Symbol;Acc:HGNC:20756]
ENSG00000040275.16	SPDL1	protein_coding	spindle apparatus coiled-coil protein 1 [Source:HGNC Symbol;Acc:HGNC:26010]
ENSG00000040341.17	STAU2	protein_coding	staufen double-stranded RNA binding protein 2 [Source:HGNC Symbol;Acc:HGNC:11371]
ENSG00000040933.15	INPP4A	protein_coding	inositol polyphosphate-4-phosphatase type I A [Source:HGNC Symbol;Acc:HGNC:6074]
ENSG00000042445.13	RETSAT	protein_coding	retinol saturase [Source:HGNC Symbol;Acc:HGNC:25991]
ENSG00000046651.14	OFD1	protein_coding	OFD1, centriole and centriolar satellite protein [Source:HGNC Symbol;Acc:HGNC:2567]
ENSG00000047315.15	POLR2B	protein_coding	RNA polymerase II subunit B [Source:HGNC Symbol;Acc:HGNC:9188]
ENSG00000047579.19	DTNBP1	protein_coding	dystrobrevin binding protein 1 [Source:HGNC Symbol;Acc:HGNC:17328]
ENSG00000047849.21	MAP4	protein_coding	microtubule associated protein 4 [Source:HGNC Symbol;Acc:HGNC:6862]
ENSG00000048162.20	NOP16	protein_coding	NOP16 nucleolar protein [Source:HGNC Symbol;Acc:HGNC:26934]
ENSG00000050426.15	LETMD1	protein_coding	LETM1 domain containing 1 [Source:HGNC Symbol;Acc:HGNC:24241]
ENSG00000051523.10	CYBA	protein_coding	cytochrome b-245 alpha chain [Source:HGNC Symbol;Acc:HGNC:2577]
ENSG00000054148.17	PHPT1	protein_coding	phosphohistidine phosphatase 1 [Source:HGNC Symbol;Acc:HGNC:30033]
ENSG00000054267.21	ARID4B	protein_coding	AT-rich interaction domain 4B [Source:HGNC Symbol;Acc:HGNC:15550]
ENSG00000054523.17	KIF1B	protein_coding	kinesin family member 1B [Source:HGNC Symbol;Acc:HGNC:16636]
ENSG00000054690.13	PLEKHH1	protein_coding	pleckstrin homology, MyTH4 and FERM domain containing H1 [Source:HGNC Symbol;Acc:HGNC:17733]
ENSG00000055147.18	FAM114A2	protein_coding	family with sequence similarity 114 member A2 [Source:HGNC Symbol;Acc:HGNC:1333]
ENSG00000055163.19	CYFIP2	protein_coding	cytoplasmic FMR1 interacting protein 2 [Source:HGNC Symbol;Acc:HGNC:13760]
ENSG00000055208.18	TAB2	protein_coding	TGF-beta activated kinase 1/MAP3K7 binding protein 2 [Source:HGNC Symbol;Acc:HGNC:17075]
ENSG00000055950.16	MRPL43	protein_coding	mitochondrial ribosomal protein L43 [Source:HGNC Symbol;Acc:HGNC:14517]
ENSG00000056998.19	GYG2	protein_coding	glycogenin 2 [Source:HGNC Symbol;Acc:HGNC:4700]
ENSG00000057294.14	PKP2	protein_coding	plakophilin 2 [Source:HGNC Symbol;Acc:HGNC:9024]
ENSG00000057663.14	ATG5	protein_coding	autophagy related 5 [Source:HGNC Symbol;Acc:HGNC:589]
ENSG00000059378.12	PARP12	protein_coding	poly(ADP-ribose) polymerase family member 12 [Source:HGNC Symbol;Acc:HGNC:21919]
ENSG00000059588.9	TARBP1	protein_coding	TAR (HIV-1) RNA binding protein 1 [Source:HGNC Symbol;Acc:HGNC:11568]
ENSG00000059691.11	GATB	protein_coding	glutamyl-tRNA amidotransferase subunit B [Source:HGNC Symbol;Acc:HGNC:8849]
ENSG00000059758.7	CDK17	protein_coding	cyclin dependent kinase 17 [Source:HGNC Symbol;Acc:HGNC:8750]
ENSG00000060656.19	PTPRU	protein_coding	protein tyrosine phosphatase, receptor type U [Source:HGNC Symbol;Acc:HGNC:9683]
ENSG00000060688.12	SNRNP40	protein_coding	small nuclear ribonucleoprotein U5 subunit 40 [Source:HGNC Symbol;Acc:HGNC:30857]
ENSG00000062370.16	ZNF112	protein_coding	zinc finger protein 112 [Source:HGNC Symbol;Acc:HGNC:12892]
ENSG00000063176.15	SPHK2	protein_coding	sphingosine kinase 2 [Source:HGNC Symbol;Acc:HGNC:18859]
ENSG00000064195.7	DLX3	protein_coding	distal-less homeobox 3 [Source:HGNC Symbol;Acc:HGNC:2916]
ENSG00000064703.11	DDX20	protein_coding	DEAD-box helicase 20 [Source:HGNC Symbol;Acc:HGNC:2743]
ENSG00000064787.13	BCAS1	protein_coding	breast carcinoma amplified sequence 1 [Source:HGNC Symbol;Acc:HGNC:974]
ENSG00000065600.12	TMEM206	protein_coding	transmembrane protein 206 [Source:HGNC Symbol;Acc:HGNC:25593]
ENSG00000065717.14	TLE2	protein_coding	transducin like enhancer of split 2 [Source:HGNC Symbol;Acc:HGNC:11838]
ENSG00000065882.15	TBC1D1	protein_coding	TBC1 domain family member 1 [Source:HGNC Symbol;Acc:HGNC:11578]
ENSG00000065989.15	PDE4A	protein_coding	phosphodiesterase 4A [Source:HGNC Symbol;Acc:HGNC:8780]
ENSG00000066117.14	SMARCD1	protein_coding	SWI/SNF related, matrix associated, actin dependent regulator of chromatin, subfamily d, member 1 [Source:HGNC Symbol;Acc:HGNC:11106]
ENSG00000066322.14	ELOVL1	protein_coding	ELOVL fatty acid elongase 1 [Source:HGNC Symbol;Acc:HGNC:14418]
ENSG00000066379.14	ZNRD1	protein_coding	zinc ribbon domain containing 1 [Source:HGNC Symbol;Acc:HGNC:13182]
ENSG00000066427.21	ATXN3	protein_coding	ataxin 3 [Source:HGNC Symbol;Acc:HGNC:7106]
ENSG00000066629.16	EML1	protein_coding	echinoderm microtubule associated protein like 1 [Source:HGNC Symbol;Acc:HGNC:3330]
ENSG00000066926.10	FECH	protein_coding	ferrochelatase [Source:HGNC Symbol;Acc:HGNC:3647]
ENSG00000067248.9	DHX29	protein_coding	DExH-box helicase 29 [Source:HGNC Symbol;Acc:HGNC:15815]
ENSG00000067606.16	PRKCZ	protein_coding	protein kinase C zeta [Source:HGNC Symbol;Acc:HGNC:9412]
ENSG00000068120.14	COASY	protein_coding	Coenzyme A synthase [Source:HGNC Symbol;Acc:HGNC:29932]
ENSG00000068724.15	TTC7A	protein_coding	tetratricopeptide repeat domain 7A [Source:HGNC Symbol;Acc:HGNC:19750]
ENSG00000068745.14	IP6K2	protein_coding	inositol hexakisphosphate kinase 2 [Source:HGNC Symbol;Acc:HGNC:17313]
ENSG00000068878.14	PSME4	protein_coding	proteasome activator subunit 4 [Source:HGNC Symbol;Acc:HGNC:20635]
ENSG00000068885.14	IFT80	protein_coding	intraflagellar transport 80 [Source:HGNC Symbol;Acc:HGNC:29262]
ENSG00000069424.14	KCNAB2	protein_coding	potassium voltage-gated channel subfamily A regulatory beta subunit 2 [Source:HGNC Symbol;Acc:HGNC:6229]
ENSG00000069974.15	RAB27A	protein_coding	RAB27A, member RAS oncogene family [Source:HGNC Symbol;Acc:HGNC:9766]
ENSG00000069998.12	HDHD5	protein_coding	haloacid dehalogenase like hydrolase domain containing 5 [Source:HGNC Symbol;Acc:HGNC:1843]
ENSG00000070087.13	PFN2	protein_coding	profilin 2 [Source:HGNC Symbol;Acc:HGNC:8882]
ENSG00000070413.19	DGCR2	protein_coding	DiGeorge syndrome critical region gene 2 [Source:HGNC Symbol;Acc:HGNC:2845]
ENSG00000070423.17	RNF126	protein_coding	ring finger protein 126 [Source:HGNC Symbol;Acc:HGNC:21151]
ENSG00000070761.7	CFAP20	protein_coding	cilia and flagella associated protein 20 [Source:HGNC Symbol;Acc:HGNC:29523]
ENSG00000071189.21	SNX13	protein_coding	sorting nexin 13 [Source:HGNC Symbol;Acc:HGNC:21335]
ENSG00000071242.11	RPS6KA2	protein_coding	ribosomal protein S6 kinase A2 [Source:HGNC Symbol;Acc:HGNC:10431]
ENSG00000071246.10	VASH1	protein_coding	vasohibin 1 [Source:HGNC Symbol;Acc:HGNC:19964]
ENSG00000071564.14	TCF3	protein_coding	transcription factor 3 [Source:HGNC Symbol;Acc:HGNC:11633]
ENSG00000072110.13	ACTN1	protein_coding	actinin alpha 1 [Source:HGNC Symbol;Acc:HGNC:163]
ENSG00000072134.15	EPN2	protein_coding	epsin 2 [Source:HGNC Symbol;Acc:HGNC:18639]
ENSG00000072364.12	AFF4	protein_coding	AF4/FMR2 family member 4 [Source:HGNC Symbol;Acc:HGNC:17869]
ENSG00000072401.14	UBE2D1	protein_coding	ubiquitin conjugating enzyme E2 D1 [Source:HGNC Symbol;Acc:HGNC:12474]
ENSG00000072518.20	MARK2	protein_coding	microtubule affinity regulating kinase 2 [Source:HGNC Symbol;Acc:HGNC:3332]
ENSG00000072736.18	NFATC3	protein_coding	nuclear factor of activated T-cells 3 [Source:HGNC Symbol;Acc:HGNC:7777]
ENSG00000072858.10	SIDT1	protein_coding	SID1 transmembrane family member 1 [Source:HGNC Symbol;Acc:HGNC:25967]
ENSG00000072864.14	NDE1	protein_coding	nudE neurodevelopment protein 1 [Source:HGNC Symbol;Acc:HGNC:17619]
ENSG00000072958.8	AP1M1	protein_coding	adaptor related protein complex 1 mu 1 subunit [Source:HGNC Symbol;Acc:HGNC:13667]
ENSG00000073578.16	SDHA	protein_coding	succinate dehydrogenase complex flavoprotein subunit A [Source:HGNC Symbol;Acc:HGNC:10680]
ENSG00000074964.16	ARHGEF10L	protein_coding	Rho guanine nucleotide exchange factor 10 like [Source:HGNC Symbol;Acc:HGNC:25540]
ENSG00000075188.8	NUP37	protein_coding	nucleoporin 37 [Source:HGNC Symbol;Acc:HGNC:29929]
ENSG00000075240.16	GRAMD4	protein_coding	GRAM domain containing 4 [Source:HGNC Symbol;Acc:HGNC:29113]
ENSG00000075336.11	TIMM21	protein_coding	translocase of inner mitochondrial membrane 21 [Source:HGNC Symbol;Acc:HGNC:25010]
ENSG00000075539.14	FRYL	protein_coding	FRY like transcription coactivator [Source:HGNC Symbol;Acc:HGNC:29127]
ENSG00000075702.16	WDR62	protein_coding	WD repeat domain 62 [Source:HGNC Symbol;Acc:HGNC:24502]
ENSG00000075856.11	SART3	protein_coding	squamous cell carcinoma antigen recognized by T-cells 3 [Source:HGNC Symbol;Acc:HGNC:16860]
ENSG00000076043.9	REXO2	protein_coding	RNA exonuclease 2 [Source:HGNC Symbol;Acc:HGNC:17851]
ENSG00000076770.14	MBNL3	protein_coding	muscleblind like splicing regulator 3 [Source:HGNC Symbol;Acc:HGNC:20564]
ENSG00000077238.13	IL4R	protein_coding	interleukin 4 receptor [Source:HGNC Symbol;Acc:HGNC:6015]
ENSG00000077454.15	LRCH4	protein_coding	leucine rich repeats and calponin homology domain containing 4 [Source:HGNC Symbol;Acc:HGNC:6691]
ENSG00000077721.15	UBE2A	protein_coding	ubiquitin conjugating enzyme E2 A [Source:HGNC Symbol;Acc:HGNC:12472]
ENSG00000078061.12	ARAF	protein_coding	A-Raf proto-oncogene, serine/threonine kinase [Source:HGNC Symbol;Acc:HGNC:646]
ENSG00000078070.12	MCCC1	protein_coding	methylcrotonoyl-CoA carboxylase 1 [Source:HGNC Symbol;Acc:HGNC:6936]
ENSG00000078124.11	ACER3	protein_coding	alkaline ceramidase 3 [Source:HGNC Symbol;Acc:HGNC:16066]
ENSG00000078142.12	PIK3C3	protein_coding	phosphatidylinositol 3-kinase catalytic subunit type 3 [Source:HGNC Symbol;Acc:HGNC:8974]
ENSG00000078304.19	PPP2R5C	protein_coding	protein phosphatase 2 regulatory subunit B'gamma [Source:HGNC Symbol;Acc:HGNC:9311]
ENSG00000078403.16	MLLT10	protein_coding	MLLT10, histone lysine methyltransferase DOT1L cofactor [Source:HGNC Symbol;Acc:HGNC:16063]
ENSG00000078674.17	PCM1	protein_coding	pericentriolar material 1 [Source:HGNC Symbol;Acc:HGNC:8727]
ENSG00000078900.14	TP73	protein_coding	tumor protein p73 [Source:HGNC Symbol;Acc:HGNC:12003]
ENSG00000080503.22	SMARCA2	protein_coding	SWI/SNF related, matrix associated, actin dependent regulator of chromatin, subfamily a, member 2 [Source:HGNC Symbol;Acc:HGNC:11098]
ENSG00000080819.6	CPOX	protein_coding	coproporphyrinogen oxidase [Source:HGNC Symbol;Acc:HGNC:2321]
ENSG00000081019.13	RSBN1	protein_coding	round spermatid basic protein 1 [Source:HGNC Symbol;Acc:HGNC:25642]
ENSG00000081665.13	ZNF506	protein_coding	zinc finger protein 506 [Source:HGNC Symbol;Acc:HGNC:23780]
ENSG00000082258.12	CCNT2	protein_coding	cyclin T2 [Source:HGNC Symbol;Acc:HGNC:1600]
ENSG00000083307.10	GRHL2	protein_coding	grainyhead like transcription factor 2 [Source:HGNC Symbol;Acc:HGNC:2799]
ENSG00000083720.12	OXCT1	protein_coding	3-oxoacid CoA-transferase 1 [Source:HGNC Symbol;Acc:HGNC:8527]
ENSG00000084090.13	STARD7	protein_coding	StAR related lipid transfer domain containing 7 [Source:HGNC Symbol;Acc:HGNC:18063]
ENSG00000084234.16	APLP2	protein_coding	amyloid beta precursor like protein 2 [Source:HGNC Symbol;Acc:HGNC:598]
ENSG00000085274.15	MYNN	protein_coding	myoneurin [Source:HGNC Symbol;Acc:HGNC:14955]
ENSG00000085276.17	MECOM	protein_coding	MDS1 and EVI1 complex locus [Source:HGNC Symbol;Acc:HGNC:3498]
ENSG00000085415.15	SEH1L	protein_coding	SEH1 like nucleoporin [Source:HGNC Symbol;Acc:HGNC:30379]
ENSG00000085982.13	USP40	protein_coding	ubiquitin specific peptidase 40 [Source:HGNC Symbol;Acc:HGNC:20069]
ENSG00000087470.17	DNM1L	protein_coding	dynamin 1 like [Source:HGNC Symbol;Acc:HGNC:2973]
ENSG00000088305.18	DNMT3B	protein_coding	DNA methyltransferase 3 beta [Source:HGNC Symbol;Acc:HGNC:2979]
ENSG00000088367.21	EPB41L1	protein_coding	erythrocyte membrane protein band 4.1 like 1 [Source:HGNC Symbol;Acc:HGNC:3378]
ENSG00000088448.14	ANKRD10	protein_coding	ankyrin repeat domain 10 [Source:HGNC Symbol;Acc:HGNC:20265]
ENSG00000088832.16	FKBP1A	protein_coding	FK506 binding protein 1A [Source:HGNC Symbol;Acc:HGNC:3711]
ENSG00000089195.14	TRMT6	protein_coding	tRNA methyltransferase 6 [Source:HGNC Symbol;Acc:HGNC:20900]
ENSG00000089486.16	CDIP1	protein_coding	cell death inducing p53 target 1 [Source:HGNC Symbol;Acc:HGNC:13234]
ENSG00000089639.10	GMIP	protein_coding	GEM interacting protein [Source:HGNC Symbol;Acc:HGNC:24852]
ENSG00000089693.10	MLF2	protein_coding	myeloid leukemia factor 2 [Source:HGNC Symbol;Acc:HGNC:7126]
ENSG00000089737.16	DDX24	protein_coding	DEAD-box helicase 24 [Source:HGNC Symbol;Acc:HGNC:13266]
ENSG00000089818.17	NECAP1	protein_coding	NECAP endocytosis associated 1 [Source:HGNC Symbol;Acc:HGNC:24539]
ENSG00000090006.17	LTBP4	protein_coding	latent transforming growth factor beta binding protein 4 [Source:HGNC Symbol;Acc:HGNC:6717]
ENSG00000090372.14	STRN4	protein_coding	striatin 4 [Source:HGNC Symbol;Acc:HGNC:15721]
ENSG00000090612.20	ZNF268	protein_coding	zinc finger protein 268 [Source:HGNC Symbol;Acc:HGNC:13061]
ENSG00000090857.13	PDPR	protein_coding	pyruvate dehydrogenase phosphatase regulatory subunit [Source:HGNC Symbol;Acc:HGNC:30264]
ENSG00000090905.18	TNRC6A	protein_coding	trinucleotide repeat containing 6A [Source:HGNC Symbol;Acc:HGNC:11969]
ENSG00000090924.14	PLEKHG2	protein_coding	pleckstrin homology and RhoGEF domain containing G2 [Source:HGNC Symbol;Acc:HGNC:29515]
ENSG00000090989.17	EXOC1	protein_coding	exocyst complex component 1 [Source:HGNC Symbol;Acc:HGNC:30380]
ENSG00000091073.19	DTX2	protein_coding	deltex E3 ubiquitin ligase 2 [Source:HGNC Symbol;Acc:HGNC:15973]
ENSG00000091490.10	SEL1L3	protein_coding	SEL1L family member 3 [Source:HGNC Symbol;Acc:HGNC:29108]
ENSG00000092094.10	OSGEP	protein_coding	O-sialoglycoprotein endopeptidase [Source:HGNC Symbol;Acc:HGNC:18028]
ENSG00000092201.9	SUPT16H	protein_coding	SPT16 homolog, facilitates chromatin remodeling subunit [Source:HGNC Symbol;Acc:HGNC:11465]
ENSG00000092203.13	TOX4	protein_coding	TOX high mobility group box family member 4 [Source:HGNC Symbol;Acc:HGNC:20161]
ENSG00000092208.16	GEMIN2	protein_coding	gem nuclear organelle associated protein 2 [Source:HGNC Symbol;Acc:HGNC:10884]
ENSG00000092421.16	SEMA6A	protein_coding	semaphorin 6A [Source:HGNC Symbol;Acc:HGNC:10738]
ENSG00000092439.13	TRPM7	protein_coding	transient receptor potential cation channel subfamily M member 7 [Source:HGNC Symbol;Acc:HGNC:17994]
ENSG00000092531.9	SNAP23	protein_coding	synaptosome associated protein 23 [Source:HGNC Symbol;Acc:HGNC:11131]
ENSG00000092929.11	UNC13D	protein_coding	unc-13 homolog D [Source:HGNC Symbol;Acc:HGNC:23147]
ENSG00000092931.11	MFSD11	protein_coding	major facilitator superfamily domain containing 11 [Source:HGNC Symbol;Acc:HGNC:25458]
ENSG00000093000.18	NUP50	protein_coding	nucleoporin 50 [Source:HGNC Symbol;Acc:HGNC:8065]
ENSG00000093144.18	ECHDC1	protein_coding	ethylmalonyl-CoA decarboxylase 1 [Source:HGNC Symbol;Acc:HGNC:21489]
ENSG00000093167.17	LRRFIP2	protein_coding	LRR binding FLII interacting protein 2 [Source:HGNC Symbol;Acc:HGNC:6703]
ENSG00000094975.13	SUCO	protein_coding	SUN domain containing ossification factor [Source:HGNC Symbol;Acc:HGNC:1240]
ENSG00000095059.15	DHPS	protein_coding	deoxyhypusine synthase [Source:HGNC Symbol;Acc:HGNC:2869]
ENSG00000095066.11	HOOK2	protein_coding	hook microtubule tethering protein 2 [Source:HGNC Symbol;Acc:HGNC:19885]
ENSG00000095139.13	ARCN1	protein_coding	archain 1 [Source:HGNC Symbol;Acc:HGNC:649]
ENSG00000095261.13	PSMD5	protein_coding	proteasome 26S subunit, non-ATPase 5 [Source:HGNC Symbol;Acc:HGNC:9563]
ENSG00000095380.10	NANS	protein_coding	N-acetylneuraminate synthase [Source:HGNC Symbol;Acc:HGNC:19237]
ENSG00000095539.15	SEMA4G	protein_coding	semaphorin 4G [Source:HGNC Symbol;Acc:HGNC:10735]
ENSG00000095951.16	HIVEP1	protein_coding	human immunodeficiency virus type I enhancer binding protein 1 [Source:HGNC Symbol;Acc:HGNC:4920]
ENSG00000099377.13	HSD3B7	protein_coding	hydroxy-delta-5-steroid dehydrogenase, 3 beta- and steroid delta-isomerase 7 [Source:HGNC Symbol;Acc:HGNC:18324]
ENSG00000099849.14	RASSF7	protein_coding	Ras association domain family member 7 [Source:HGNC Symbol;Acc:HGNC:1166]
ENSG00000099917.17	MED15	protein_coding	mediator complex subunit 15 [Source:HGNC Symbol;Acc:HGNC:14248]
ENSG00000099949.18	LZTR1	protein_coding	leucine zipper like transcription regulator 1 [Source:HGNC Symbol;Acc:HGNC:6742]
ENSG00000099968.17	BCL2L13	protein_coding	BCL2 like 13 [Source:HGNC Symbol;Acc:HGNC:17164]
ENSG00000099992.15	TBC1D10A	protein_coding	TBC1 domain family member 10A [Source:HGNC Symbol;Acc:HGNC:23609]
ENSG00000100023.18	PPIL2	protein_coding	peptidylprolyl isomerase like 2 [Source:HGNC Symbol;Acc:HGNC:9261]
ENSG00000100099.20	HPS4	protein_coding	HPS4, biogenesis of lysosomal organelles complex 3 subunit 2 [Source:HGNC Symbol;Acc:HGNC:15844]
ENSG00000100100.12	PIK3IP1	protein_coding	phosphoinositide-3-kinase interacting protein 1 [Source:HGNC Symbol;Acc:HGNC:24942]
ENSG00000100109.16	TFIP11	protein_coding	tuftelin interacting protein 11 [Source:HGNC Symbol;Acc:HGNC:17165]
ENSG00000100246.12	DNAL4	protein_coding	dynein axonemal light chain 4 [Source:HGNC Symbol;Acc:HGNC:2955]
ENSG00000100263.13	RHBDD3	protein_coding	rhomboid domain containing 3 [Source:HGNC Symbol;Acc:HGNC:1308]
ENSG00000100266.18	PACSIN2	protein_coding	protein kinase C and casein kinase substrate in neurons 2 [Source:HGNC Symbol;Acc:HGNC:8571]
ENSG00000100284.20	TOM1	protein_coding	target of myb1 membrane trafficking protein [Source:HGNC Symbol;Acc:HGNC:11982]
ENSG00000100299.17	ARSA	protein_coding	arylsulfatase A [Source:HGNC Symbol;Acc:HGNC:713]
ENSG00000100335.13	MIEF1	protein_coding	mitochondrial elongation factor 1 [Source:HGNC Symbol;Acc:HGNC:25979]
ENSG00000100359.20	SGSM3	protein_coding	small G protein signaling modulator 3 [Source:HGNC Symbol;Acc:HGNC:25228]
ENSG00000100483.13	VCPKMT	protein_coding	valosin containing protein lysine methyltransferase [Source:HGNC Symbol;Acc:HGNC:20352]
ENSG00000100519.11	PSMC6	protein_coding	proteasome 26S subunit, ATPase 6 [Source:HGNC Symbol;Acc:HGNC:9553]
ENSG00000100577.18	GSTZ1	protein_coding	glutathione S-transferase zeta 1 [Source:HGNC Symbol;Acc:HGNC:4643]
ENSG00000100578.14	KIAA0586	protein_coding	KIAA0586 [Source:HGNC Symbol;Acc:HGNC:19960]
ENSG00000100714.15	MTHFD1	protein_coding	methylenetetrahydrofolate dehydrogenase, cyclohydrolase and formyltetrahydrofolate synthetase 1 [Source:HGNC Symbol;Acc:HGNC:7432]
ENSG00000100814.17	CCNB1IP1	protein_coding	cyclin B1 interacting protein 1 [Source:HGNC Symbol;Acc:HGNC:19437]
ENSG00000100890.15	KIAA0391	protein_coding	KIAA0391 [Source:HGNC Symbol;Acc:HGNC:19958]
ENSG00000101084.17	C20orf24	protein_coding	chromosome 20 open reading frame 24 [Source:HGNC Symbol;Acc:HGNC:15870]
ENSG00000101098.12	RIMS4	protein_coding	regulating synaptic membrane exocytosis 4 [Source:HGNC Symbol;Acc:HGNC:16183]
ENSG00000101115.12	SALL4	protein_coding	spalt like transcription factor 4 [Source:HGNC Symbol;Acc:HGNC:15924]
ENSG00000101138.11	CSTF1	protein_coding	cleavage stimulation factor subunit 1 [Source:HGNC Symbol;Acc:HGNC:2483]
ENSG00000101187.15	SLCO4A1	protein_coding	solute carrier organic anion transporter family member 4A1 [Source:HGNC Symbol;Acc:HGNC:10953]
ENSG00000101236.16	RNF24	protein_coding	ring finger protein 24 [Source:HGNC Symbol;Acc:HGNC:13779]
ENSG00000101310.14	SEC23B	protein_coding	Sec23 homolog B, coat complex II component [Source:HGNC Symbol;Acc:HGNC:10702]
ENSG00000101346.13	POFUT1	protein_coding	protein O-fucosyltransferase 1 [Source:HGNC Symbol;Acc:HGNC:14988]
ENSG00000101365.20	IDH3B	protein_coding	isocitrate dehydrogenase 3 (NAD(+)) beta [Source:HGNC Symbol;Acc:HGNC:5385]
ENSG00000101417.11	PXMP4	protein_coding	peroxisomal membrane protein 4 [Source:HGNC Symbol;Acc:HGNC:15920]
ENSG00000101473.16	ACOT8	protein_coding	acyl-CoA thioesterase 8 [Source:HGNC Symbol;Acc:HGNC:15919]
ENSG00000101557.14	USP14	protein_coding	ubiquitin specific peptidase 14 [Source:HGNC Symbol;Acc:HGNC:12612]
ENSG00000101639.18	CEP192	protein_coding	centrosomal protein 192 [Source:HGNC Symbol;Acc:HGNC:25515]
ENSG00000101654.17	RNMT	protein_coding	RNA guanine-7 methyltransferase [Source:HGNC Symbol;Acc:HGNC:10075]
ENSG00000101911.12	PRPS2	protein_coding	phosphoribosyl pyrophosphate synthetase 2 [Source:HGNC Symbol;Acc:HGNC:9465]
ENSG00000101940.17	WDR13	protein_coding	WD repeat domain 13 [Source:HGNC Symbol;Acc:HGNC:14352]
ENSG00000102078.15	SLC25A14	protein_coding	solute carrier family 25 member 14 [Source:HGNC Symbol;Acc:HGNC:10984]
ENSG00000102100.15	SLC35A2	protein_coding	solute carrier family 35 member A2 [Source:HGNC Symbol;Acc:HGNC:11022]
ENSG00000102158.19	MAGT1	protein_coding	magnesium transporter 1 [Source:HGNC Symbol;Acc:HGNC:28880]
ENSG00000102316.16	MAGED2	protein_coding	MAGE family member D2 [Source:HGNC Symbol;Acc:HGNC:16353]
ENSG00000102710.19	SUPT20H	protein_coding	SPT20 homolog, SAGA complex component [Source:HGNC Symbol;Acc:HGNC:20596]
ENSG00000102786.14	INTS6	protein_coding	integrator complex subunit 6 [Source:HGNC Symbol;Acc:HGNC:14879]
ENSG00000102871.15	TRADD	protein_coding	TNFRSF1A associated via death domain [Source:HGNC Symbol;Acc:HGNC:12030]
ENSG00000102878.16	HSF4	protein_coding	heat shock transcription factor 4 [Source:HGNC Symbol;Acc:HGNC:5227]
ENSG00000102882.11	MAPK3	protein_coding	mitogen-activated protein kinase 3 [Source:HGNC Symbol;Acc:HGNC:6877]
ENSG00000102984.14	ZNF821	protein_coding	zinc finger protein 821 [Source:HGNC Symbol;Acc:HGNC:28043]
ENSG00000103024.7	NME3	protein_coding	NME/NM23 nucleoside diphosphate kinase 3 [Source:HGNC Symbol;Acc:HGNC:7851]
ENSG00000103034.14	NDRG4	protein_coding	NDRG family member 4 [Source:HGNC Symbol;Acc:HGNC:14466]
ENSG00000103042.8	SLC38A7	protein_coding	solute carrier family 38 member 7 [Source:HGNC Symbol;Acc:HGNC:25582]
ENSG00000103056.11	SMPD3	protein_coding	sphingomyelin phosphodiesterase 3 [Source:HGNC Symbol;Acc:HGNC:14240]
ENSG00000103089.8	FA2H	protein_coding	fatty acid 2-hydroxylase [Source:HGNC Symbol;Acc:HGNC:21197]
ENSG00000103168.16	TAF1C	protein_coding	TATA-box binding protein associated factor, RNA polymerase I subunit C [Source:HGNC Symbol;Acc:HGNC:11534]
ENSG00000103187.7	COTL1	protein_coding	coactosin like F-actin binding protein 1 [Source:HGNC Symbol;Acc:HGNC:18304]
ENSG00000103197.16	TSC2	protein_coding	tuberous sclerosis 2 [Source:HGNC Symbol;Acc:HGNC:12363]
ENSG00000103222.18	ABCC1	protein_coding	ATP binding cassette subfamily C member 1 [Source:HGNC Symbol;Acc:HGNC:51]
ENSG00000103227.18	LMF1	protein_coding	lipase maturation factor 1 [Source:HGNC Symbol;Acc:HGNC:14154]
ENSG00000103356.15	EARS2	protein_coding	glutamyl-tRNA synthetase 2, mitochondrial [Source:HGNC Symbol;Acc:HGNC:29419]
ENSG00000103423.13	DNAJA3	protein_coding	DnaJ heat shock protein family (Hsp40) member A3 [Source:HGNC Symbol;Acc:HGNC:11808]
ENSG00000103429.10	BFAR	protein_coding	bifunctional apoptosis regulator [Source:HGNC Symbol;Acc:HGNC:17613]
ENSG00000103512.14	NOMO1	protein_coding	NODAL modulator 1 [Source:HGNC Symbol;Acc:HGNC:30060]
ENSG00000103528.16	SYT17	protein_coding	synaptotagmin 17 [Source:HGNC Symbol;Acc:HGNC:24119]
ENSG00000103540.16	CCP110	protein_coding	centriolar coiled-coil protein 110 [Source:HGNC Symbol;Acc:HGNC:24342]
ENSG00000103966.10	EHD4	protein_coding	EH domain containing 4 [Source:HGNC Symbol;Acc:HGNC:3245]
ENSG00000103995.13	CEP152	protein_coding	centrosomal protein 152 [Source:HGNC Symbol;Acc:HGNC:29298]
ENSG00000104064.16	GABPB1	protein_coding	GA binding protein transcription factor beta subunit 1 [Source:HGNC Symbol;Acc:HGNC:4074]
ENSG00000104081.13	BMF	protein_coding	Bcl2 modifying factor [Source:HGNC Symbol;Acc:HGNC:24132]
ENSG00000104205.12	SGK3	protein_coding	serum/glucocorticoid regulated kinase family member 3 [Source:HGNC Symbol;Acc:HGNC:10812]
ENSG00000104228.12	TRIM35	protein_coding	tripartite motif containing 35 [Source:HGNC Symbol;Acc:HGNC:16285]
ENSG00000104365.13	IKBKB	protein_coding	inhibitor of nuclear factor kappa B kinase subunit beta [Source:HGNC Symbol;Acc:HGNC:5960]
ENSG00000104490.17	NCALD	protein_coding	neurocalcin delta [Source:HGNC Symbol;Acc:HGNC:7655]
ENSG00000104517.12	UBR5	protein_coding	ubiquitin protein ligase E3 component n-recognin 5 [Source:HGNC Symbol;Acc:HGNC:16806]
ENSG00000104643.9	MTMR9	protein_coding	myotubularin related protein 9 [Source:HGNC Symbol;Acc:HGNC:14596]
ENSG00000104756.15	KCTD9	protein_coding	potassium channel tetramerization domain containing 9 [Source:HGNC Symbol;Acc:HGNC:22401]
ENSG00000104783.11	KCNN4	protein_coding	potassium calcium-activated channel subfamily N member 4 [Source:HGNC Symbol;Acc:HGNC:6293]
ENSG00000104812.14	GYS1	protein_coding	glycogen synthase 1 [Source:HGNC Symbol;Acc:HGNC:4706]
ENSG00000104825.16	NFKBIB	protein_coding	NFKB inhibitor beta [Source:HGNC Symbol;Acc:HGNC:7798]
ENSG00000105085.10	MED26	protein_coding	mediator complex subunit 26 [Source:HGNC Symbol;Acc:HGNC:2376]
ENSG00000105136.20	ZNF419	protein_coding	zinc finger protein 419 [Source:HGNC Symbol;Acc:HGNC:20648]
ENSG00000105173.13	CCNE1	protein_coding	cyclin E1 [Source:HGNC Symbol;Acc:HGNC:1589]
ENSG00000105287.12	PRKD2	protein_coding	protein kinase D2 [Source:HGNC Symbol;Acc:HGNC:17293]
ENSG00000105397.13	TYK2	protein_coding	tyrosine kinase 2 [Source:HGNC Symbol;Acc:HGNC:12440]
ENSG00000105443.14	CYTH2	protein_coding	cytohesin 2 [Source:HGNC Symbol;Acc:HGNC:9502]
ENSG00000105472.12	CLEC11A	protein_coding	C-type lectin domain containing 11A [Source:HGNC Symbol;Acc:HGNC:10576]
ENSG00000105656.12	ELL	protein_coding	elongation factor for RNA polymerase II [Source:HGNC Symbol;Acc:HGNC:23114]
ENSG00000105677.11	TMEM147	protein_coding	transmembrane protein 147 [Source:HGNC Symbol;Acc:HGNC:30414]
ENSG00000105698.15	USF2	protein_coding	upstream transcription factor 2, c-fos interacting [Source:HGNC Symbol;Acc:HGNC:12594]
ENSG00000105711.11	SCN1B	protein_coding	sodium voltage-gated channel beta subunit 1 [Source:HGNC Symbol;Acc:HGNC:10586]
ENSG00000105750.14	ZNF85	protein_coding	zinc finger protein 85 [Source:HGNC Symbol;Acc:HGNC:13160]
ENSG00000105755.7	ETHE1	protein_coding	ETHE1, persulfide dioxygenase [Source:HGNC Symbol;Acc:HGNC:23287]
ENSG00000105926.15	MPP6	protein_coding	membrane palmitoylated protein 6 [Source:HGNC Symbol;Acc:HGNC:18167]
ENSG00000106003.12	LFNG	protein_coding	LFNG O-fucosylpeptide 3-beta-N-acetylglucosaminyltransferase [Source:HGNC Symbol;Acc:HGNC:6560]
ENSG00000106078.17	COBL	protein_coding	cordon-bleu WH2 repeat protein [Source:HGNC Symbol;Acc:HGNC:22199]
ENSG00000106133.17	NSUN5P2	transcribed_unprocessed_pseudogene	NOP2/Sun RNA methyltransferase family member 5 pseudogene 2 [Source:HGNC Symbol;Acc:HGNC:16609]
ENSG00000106144.19	CASP2	protein_coding	caspase 2 [Source:HGNC Symbol;Acc:HGNC:1503]
ENSG00000106261.16	ZKSCAN1	protein_coding	zinc finger with KRAB and SCAN domains 1 [Source:HGNC Symbol;Acc:HGNC:13101]
ENSG00000106290.14	TAF6	protein_coding	TATA-box binding protein associated factor 6 [Source:HGNC Symbol;Acc:HGNC:11540]
ENSG00000106330.11	MOSPD3	protein_coding	motile sperm domain containing 3 [Source:HGNC Symbol;Acc:HGNC:25078]
ENSG00000106603.18	COA1	protein_coding	cytochrome c oxidase assembly factor 1 homolog [Source:HGNC Symbol;Acc:HGNC:21868]
ENSG00000106683.14	LIMK1	protein_coding	LIM domain kinase 1 [Source:HGNC Symbol;Acc:HGNC:6613]
ENSG00000106701.11	FSD1L	protein_coding	fibronectin type III and SPRY domain containing 1 like [Source:HGNC Symbol;Acc:HGNC:13753]
ENSG00000106829.18	TLE4	protein_coding	transducin like enhancer of split 4 [Source:HGNC Symbol;Acc:HGNC:11840]
ENSG00000106868.16	SUSD1	protein_coding	sushi domain containing 1 [Source:HGNC Symbol;Acc:HGNC:25413]
ENSG00000107021.15	TBC1D13	protein_coding	TBC1 domain family member 13 [Source:HGNC Symbol;Acc:HGNC:25571]
ENSG00000107099.15	DOCK8	protein_coding	dedicator of cytokinesis 8 [Source:HGNC Symbol;Acc:HGNC:19191]
ENSG00000107263.18	RAPGEF1	protein_coding	Rap guanine nucleotide exchange factor 1 [Source:HGNC Symbol;Acc:HGNC:4568]
ENSG00000107372.12	ZFAND5	protein_coding	zinc finger AN1-type containing 5 [Source:HGNC Symbol;Acc:HGNC:13008]
ENSG00000107521.18	HPS1	protein_coding	HPS1, biogenesis of lysosomal organelles complex 3 subunit 1 [Source:HGNC Symbol;Acc:HGNC:5163]
ENSG00000107771.15	CCSER2	protein_coding	coiled-coil serine rich protein 2 [Source:HGNC Symbol;Acc:HGNC:29197]
ENSG00000107833.10	NPM3	protein_coding	nucleophosmin/nucleoplasmin 3 [Source:HGNC Symbol;Acc:HGNC:7931]
ENSG00000107902.13	LHPP	protein_coding	phospholysine phosphohistidine inorganic pyrophosphate phosphatase [Source:HGNC Symbol;Acc:HGNC:30042]
ENSG00000108239.8	TBC1D12	protein_coding	TBC1 domain family member 12 [Source:HGNC Symbol;Acc:HGNC:29082]
ENSG00000108474.16	PIGL	protein_coding	phosphatidylinositol glycan anchor biosynthesis class L [Source:HGNC Symbol;Acc:HGNC:8966]
ENSG00000108578.14	BLMH	protein_coding	bleomycin hydrolase [Source:HGNC Symbol;Acc:HGNC:1059]
ENSG00000108587.15	GOSR1	protein_coding	golgi SNAP receptor complex member 1 [Source:HGNC Symbol;Acc:HGNC:4430]
ENSG00000108591.9	DRG2	protein_coding	developmentally regulated GTP binding protein 2 [Source:HGNC Symbol;Acc:HGNC:3030]
ENSG00000108691.9	CCL2	protein_coding	C-C motif chemokine ligand 2 [Source:HGNC Symbol;Acc:HGNC:10618]
ENSG00000108784.9	NAGLU	protein_coding	N-acetyl-alpha-glucosaminidase [Source:HGNC Symbol;Acc:HGNC:7632]
ENSG00000108786.10	HSD17B1	protein_coding	hydroxysteroid 17-beta dehydrogenase 1 [Source:HGNC Symbol;Acc:HGNC:5210]
ENSG00000108821.13	COL1A1	protein_coding	collagen type I alpha 1 chain [Source:HGNC Symbol;Acc:HGNC:2197]
ENSG00000108852.14	MPP2	protein_coding	membrane palmitoylated protein 2 [Source:HGNC Symbol;Acc:HGNC:7220]
ENSG00000108963.17	DPH1	protein_coding	diphthamide biosynthesis 1 [Source:HGNC Symbol;Acc:HGNC:3003]
ENSG00000109083.13	IFT20	protein_coding	intraflagellar transport 20 [Source:HGNC Symbol;Acc:HGNC:30989]
ENSG00000109184.14	DCUN1D4	protein_coding	defective in cullin neddylation 1 domain containing 4 [Source:HGNC Symbol;Acc:HGNC:28998]
ENSG00000109320.11	NFKB1	protein_coding	nuclear factor kappa B subunit 1 [Source:HGNC Symbol;Acc:HGNC:7794]
ENSG00000109339.20	MAPK10	protein_coding	mitogen-activated protein kinase 10 [Source:HGNC Symbol;Acc:HGNC:6872]
ENSG00000109445.10	ZNF330	protein_coding	zinc finger protein 330 [Source:HGNC Symbol;Acc:HGNC:15462]
ENSG00000109501.13	WFS1	protein_coding	wolframin ER transmembrane glycoprotein [Source:HGNC Symbol;Acc:HGNC:12762]
ENSG00000109654.14	TRIM2	protein_coding	tripartite motif containing 2 [Source:HGNC Symbol;Acc:HGNC:15974]
ENSG00000109685.17	NSD2	protein_coding	nuclear receptor binding SET domain protein 2 [Source:HGNC Symbol;Acc:HGNC:12766]
ENSG00000109686.17	SH3D19	protein_coding	SH3 domain containing 19 [Source:HGNC Symbol;Acc:HGNC:30418]
ENSG00000109689.15	STIM2	protein_coding	stromal interaction molecule 2 [Source:HGNC Symbol;Acc:HGNC:19205]
ENSG00000109775.10	UFSP2	protein_coding	UFM1 specific peptidase 2 [Source:HGNC Symbol;Acc:HGNC:25640]
ENSG00000109790.16	KLHL5	protein_coding	kelch like family member 5 [Source:HGNC Symbol;Acc:HGNC:6356]
ENSG00000110057.7	UNC93B1	protein_coding	unc-93 homolog B1 (C. elegans) [Source:HGNC Symbol;Acc:HGNC:13481]
ENSG00000110074.10	FOXRED1	protein_coding	FAD dependent oxidoreductase domain containing 1 [Source:HGNC Symbol;Acc:HGNC:26927]
ENSG00000110075.14	PPP6R3	protein_coding	protein phosphatase 6 regulatory subunit 3 [Source:HGNC Symbol;Acc:HGNC:1173]
ENSG00000110108.9	TMEM109	protein_coding	transmembrane protein 109 [Source:HGNC Symbol;Acc:HGNC:28771]
ENSG00000110172.11	CHORDC1	protein_coding	cysteine and histidine rich domain containing 1 [Source:HGNC Symbol;Acc:HGNC:14525]
ENSG00000110218.8	PANX1	protein_coding	pannexin 1 [Source:HGNC Symbol;Acc:HGNC:8599]
ENSG00000110321.16	EIF4G2	protein_coding	eukaryotic translation initiation factor 4 gamma 2 [Source:HGNC Symbol;Acc:HGNC:3297]
ENSG00000110328.5	GALNT18	protein_coding	polypeptide N-acetylgalactosaminyltransferase 18 [Source:HGNC Symbol;Acc:HGNC:30488]
ENSG00000110344.9	UBE4A	protein_coding	ubiquitination factor E4A [Source:HGNC Symbol;Acc:HGNC:12499]
ENSG00000110429.13	FBXO3	protein_coding	F-box protein 3 [Source:HGNC Symbol;Acc:HGNC:13582]
ENSG00000110583.12	NAA40	protein_coding	N(alpha)-acetyltransferase 40, NatD catalytic subunit [Source:HGNC Symbol;Acc:HGNC:25845]
ENSG00000110651.11	CD81	protein_coding	CD81 molecule [Source:HGNC Symbol;Acc:HGNC:1701]
ENSG00000110801.13	PSMD9	protein_coding	proteasome 26S subunit, non-ATPase 9 [Source:HGNC Symbol;Acc:HGNC:9567]
ENSG00000111325.16	OGFOD2	protein_coding	2-oxoglutarate and iron dependent oxygenase domain containing 2 [Source:HGNC Symbol;Acc:HGNC:25823]
ENSG00000111364.15	DDX55	protein_coding	DEAD-box helicase 55 [Source:HGNC Symbol;Acc:HGNC:20085]
ENSG00000111452.12	ADGRD1	protein_coding	adhesion G protein-coupled receptor D1 [Source:HGNC Symbol;Acc:HGNC:19893]
ENSG00000111615.13	KRR1	protein_coding	KRR1, small subunit processome component homolog [Source:HGNC Symbol;Acc:HGNC:5176]
ENSG00000111665.11	CDCA3	protein_coding	cell division cycle associated 3 [Source:HGNC Symbol;Acc:HGNC:14624]
ENSG00000111678.10	C12orf57	protein_coding	chromosome 12 open reading frame 57 [Source:HGNC Symbol;Acc:HGNC:29521]
ENSG00000111727.11	HCFC2	protein_coding	host cell factor C2 [Source:HGNC Symbol;Acc:HGNC:24972]
ENSG00000112183.14	RBM24	protein_coding	RNA binding motif protein 24 [Source:HGNC Symbol;Acc:HGNC:21539]
ENSG00000112186.11	CAP2	protein_coding	cyclase associated actin cytoskeleton regulatory protein 2 [Source:HGNC Symbol;Acc:HGNC:20039]
ENSG00000112309.10	B3GAT2	protein_coding	beta-1,3-glucuronyltransferase 2 [Source:HGNC Symbol;Acc:HGNC:922]
ENSG00000112339.14	HBS1L	protein_coding	HBS1 like translational GTPase [Source:HGNC Symbol;Acc:HGNC:4834]
ENSG00000112511.17	PHF1	protein_coding	PHD finger protein 1 [Source:HGNC Symbol;Acc:HGNC:8919]
ENSG00000112584.13	FAM120B	protein_coding	family with sequence similarity 120B [Source:HGNC Symbol;Acc:HGNC:21109]
ENSG00000112651.11	MRPL2	protein_coding	mitochondrial ribosomal protein L2 [Source:HGNC Symbol;Acc:HGNC:14056]
ENSG00000112739.16	PRPF4B	protein_coding	pre-mRNA processing factor 4B [Source:HGNC Symbol;Acc:HGNC:17346]
ENSG00000112812.15	PRSS16	protein_coding	protease, serine 16 [Source:HGNC Symbol;Acc:HGNC:9480]
ENSG00000112874.9	NUDT12	protein_coding	nudix hydrolase 12 [Source:HGNC Symbol;Acc:HGNC:18826]
ENSG00000113068.9	PFDN1	protein_coding	prefoldin subunit 1 [Source:HGNC Symbol;Acc:HGNC:8866]
ENSG00000113240.12	CLK4	protein_coding	CDC like kinase 4 [Source:HGNC Symbol;Acc:HGNC:13659]
ENSG00000113597.17	TRAPPC13	protein_coding	trafficking protein particle complex 13 [Source:HGNC Symbol;Acc:HGNC:25828]
ENSG00000113648.16	H2AFY	protein_coding	H2A histone family member Y [Source:HGNC Symbol;Acc:HGNC:4740]
ENSG00000113658.16	SMAD5	protein_coding	SMAD family member 5 [Source:HGNC Symbol;Acc:HGNC:6771]
ENSG00000113712.17	CSNK1A1	protein_coding	casein kinase 1 alpha 1 [Source:HGNC Symbol;Acc:HGNC:2451]
ENSG00000113761.11	ZNF346	protein_coding	zinc finger protein 346 [Source:HGNC Symbol;Acc:HGNC:16403]
ENSG00000113810.15	SMC4	protein_coding	structural maintenance of chromosomes 4 [Source:HGNC Symbol;Acc:HGNC:14013]
ENSG00000113845.9	TIMMDC1	protein_coding	translocase of inner mitochondrial membrane domain containing 1 [Source:HGNC Symbol;Acc:HGNC:1321]
ENSG00000113916.17	BCL6	protein_coding	B-cell CLL/lymphoma 6 [Source:HGNC Symbol;Acc:HGNC:1001]
ENSG00000114316.12	USP4	protein_coding	ubiquitin specific peptidase 4 [Source:HGNC Symbol;Acc:HGNC:12627]
ENSG00000114520.10	SNX4	protein_coding	sorting nexin 4 [Source:HGNC Symbol;Acc:HGNC:11175]
ENSG00000114737.15	CISH	protein_coding	cytokine inducible SH2 containing protein [Source:HGNC Symbol;Acc:HGNC:1984]
ENSG00000114857.17	NKTR	protein_coding	natural killer cell triggering receptor [Source:HGNC Symbol;Acc:HGNC:7833]
ENSG00000114859.15	CLCN2	protein_coding	chloride voltage-gated channel 2 [Source:HGNC Symbol;Acc:HGNC:2020]
ENSG00000114867.20	EIF4G1	protein_coding	eukaryotic translation initiation factor 4 gamma 1 [Source:HGNC Symbol;Acc:HGNC:3296]
ENSG00000115137.11	DNAJC27	protein_coding	DnaJ heat shock protein family (Hsp40) member C27 [Source:HGNC Symbol;Acc:HGNC:30290]
ENSG00000115159.15	GPD2	protein_coding	glycerol-3-phosphate dehydrogenase 2 [Source:HGNC Symbol;Acc:HGNC:4456]
ENSG00000115163.14	CENPA	protein_coding	centromere protein A [Source:HGNC Symbol;Acc:HGNC:1851]
ENSG00000115216.13	NRBP1	protein_coding	nuclear receptor binding protein 1 [Source:HGNC Symbol;Acc:HGNC:7993]
ENSG00000115221.10	ITGB6	protein_coding	integrin subunit beta 6 [Source:HGNC Symbol;Acc:HGNC:6161]
ENSG00000115233.11	PSMD14	protein_coding	proteasome 26S subunit, non-ATPase 14 [Source:HGNC Symbol;Acc:HGNC:16889]
ENSG00000115234.10	SNX17	protein_coding	sorting nexin 17 [Source:HGNC Symbol;Acc:HGNC:14979]
ENSG00000115317.11	HTRA2	protein_coding	HtrA serine peptidase 2 [Source:HGNC Symbol;Acc:HGNC:14348]
ENSG00000115365.11	LANCL1	protein_coding	LanC like 1 [Source:HGNC Symbol;Acc:HGNC:6508]
ENSG00000115421.12	PAPOLG	protein_coding	poly(A) polymerase gamma [Source:HGNC Symbol;Acc:HGNC:14982]
ENSG00000115504.14	EHBP1	protein_coding	EH domain binding protein 1 [Source:HGNC Symbol;Acc:HGNC:29144]
ENSG00000115648.13	MLPH	protein_coding	melanophilin [Source:HGNC Symbol;Acc:HGNC:29643]
ENSG00000115761.15	NOL10	protein_coding	nucleolar protein 10 [Source:HGNC Symbol;Acc:HGNC:25862]
ENSG00000115827.13	DCAF17	protein_coding	DDB1 and CUL4 associated factor 17 [Source:HGNC Symbol;Acc:HGNC:25784]
ENSG00000115840.13	SLC25A12	protein_coding	solute carrier family 25 member 12 [Source:HGNC Symbol;Acc:HGNC:10982]
ENSG00000115866.10	DARS	protein_coding	aspartyl-tRNA synthetase [Source:HGNC Symbol;Acc:HGNC:2678]
ENSG00000115902.10	SLC1A4	protein_coding	solute carrier family 1 member 4 [Source:HGNC Symbol;Acc:HGNC:10942]
ENSG00000115935.17	WIPF1	protein_coding	WAS/WASL interacting protein family member 1 [Source:HGNC Symbol;Acc:HGNC:12736]
ENSG00000116030.16	SUMO1	protein_coding	small ubiquitin-like modifier 1 [Source:HGNC Symbol;Acc:HGNC:12502]
ENSG00000116212.14	LRRC42	protein_coding	leucine rich repeat containing 42 [Source:HGNC Symbol;Acc:HGNC:28792]
ENSG00000116299.16	KIAA1324	protein_coding	KIAA1324 [Source:HGNC Symbol;Acc:HGNC:29618]
ENSG00000116353.15	MECR	protein_coding	mitochondrial trans-2-enoyl-CoA reductase [Source:HGNC Symbol;Acc:HGNC:19691]
ENSG00000116497.17	S100PBP	protein_coding	S100P binding protein [Source:HGNC Symbol;Acc:HGNC:25768]
ENSG00000116521.10	SCAMP3	protein_coding	secretory carrier membrane protein 3 [Source:HGNC Symbol;Acc:HGNC:10565]
ENSG00000116560.10	SFPQ	protein_coding	splicing factor proline and glutamine rich [Source:HGNC Symbol;Acc:HGNC:10774]
ENSG00000116688.16	MFN2	protein_coding	mitofusin 2 [Source:HGNC Symbol;Acc:HGNC:16877]
ENSG00000116809.11	ZBTB17	protein_coding	zinc finger and BTB domain containing 17 [Source:HGNC Symbol;Acc:HGNC:12936]
ENSG00000116815.15	CD58	protein_coding	CD58 molecule [Source:HGNC Symbol;Acc:HGNC:1688]
ENSG00000116874.11	WARS2	protein_coding	tryptophanyl tRNA synthetase 2, mitochondrial [Source:HGNC Symbol;Acc:HGNC:12730]
ENSG00000116954.7	RRAGC	protein_coding	Ras related GTP binding C [Source:HGNC Symbol;Acc:HGNC:19902]
ENSG00000117009.11	KMO	protein_coding	kynurenine 3-monooxygenase [Source:HGNC Symbol;Acc:HGNC:6381]
ENSG00000117228.9	GBP1	protein_coding	guanylate binding protein 1 [Source:HGNC Symbol;Acc:HGNC:4182]
ENSG00000117262.18	GPR89A	protein_coding	G protein-coupled receptor 89A [Source:HGNC Symbol;Acc:HGNC:31984]
ENSG00000117500.12	TMED5	protein_coding	transmembrane p24 trafficking protein 5 [Source:HGNC Symbol;Acc:HGNC:24251]
ENSG00000117528.11	ABCD3	protein_coding	ATP binding cassette subfamily D member 3 [Source:HGNC Symbol;Acc:HGNC:67]
ENSG00000117625.13	RCOR3	protein_coding	REST corepressor 3 [Source:HGNC Symbol;Acc:HGNC:25594]
ENSG00000117676.13	RPS6KA1	protein_coding	ribosomal protein S6 kinase A1 [Source:HGNC Symbol;Acc:HGNC:10430]
ENSG00000117682.16	DHDDS	protein_coding	dehydrodolichyl diphosphate synthase subunit [Source:HGNC Symbol;Acc:HGNC:20603]
ENSG00000118007.12	STAG1	protein_coding	stromal antigen 1 [Source:HGNC Symbol;Acc:HGNC:11354]
ENSG00000118058.20	KMT2A	protein_coding	lysine methyltransferase 2A [Source:HGNC Symbol;Acc:HGNC:7132]
ENSG00000118263.14	KLF7	protein_coding	Kruppel like factor 7 [Source:HGNC Symbol;Acc:HGNC:6350]
ENSG00000118596.11	SLC16A7	protein_coding	solute carrier family 16 member 7 [Source:HGNC Symbol;Acc:HGNC:10928]
ENSG00000118873.15	RAB3GAP2	protein_coding	RAB3 GTPase activating non-catalytic protein subunit 2 [Source:HGNC Symbol;Acc:HGNC:17168]
ENSG00000118961.14	LDAH	protein_coding	lipid droplet associated hydrolase [Source:HGNC Symbol;Acc:HGNC:26145]
ENSG00000119004.15	CYP20A1	protein_coding	cytochrome P450 family 20 subfamily A member 1 [Source:HGNC Symbol;Acc:HGNC:20576]
ENSG00000119408.16	NEK6	protein_coding	NIMA related kinase 6 [Source:HGNC Symbol;Acc:HGNC:7749]
ENSG00000119471.14	HSDL2	protein_coding	hydroxysteroid dehydrogenase like 2 [Source:HGNC Symbol;Acc:HGNC:18572]
ENSG00000119522.16	DENND1A	protein_coding	DENN domain containing 1A [Source:HGNC Symbol;Acc:HGNC:29324]
ENSG00000119559.15	C19orf25	protein_coding	chromosome 19 open reading frame 25 [Source:HGNC Symbol;Acc:HGNC:26711]
ENSG00000119686.9	FLVCR2	protein_coding	feline leukemia virus subgroup C cellular receptor family member 2 [Source:HGNC Symbol;Acc:HGNC:20105]
ENSG00000119725.18	ZNF410	protein_coding	zinc finger protein 410 [Source:HGNC Symbol;Acc:HGNC:20144]
ENSG00000119777.18	TMEM214	protein_coding	transmembrane protein 214 [Source:HGNC Symbol;Acc:HGNC:25983]
ENSG00000119778.14	ATAD2B	protein_coding	ATPase family, AAA domain containing 2B [Source:HGNC Symbol;Acc:HGNC:29230]
ENSG00000119787.13	ATL2	protein_coding	atlastin GTPase 2 [Source:HGNC Symbol;Acc:HGNC:24047]
ENSG00000119977.20	TCTN3	protein_coding	tectonic family member 3 [Source:HGNC Symbol;Acc:HGNC:24519]
ENSG00000120071.13	KANSL1	protein_coding	KAT8 regulatory NSL complex subunit 1 [Source:HGNC Symbol;Acc:HGNC:24565]
ENSG00000120093.11	HOXB3	protein_coding	homeobox B3 [Source:HGNC Symbol;Acc:HGNC:5114]
ENSG00000120519.14	SLC10A7	protein_coding	solute carrier family 10 member 7 [Source:HGNC Symbol;Acc:HGNC:23088]
ENSG00000120647.9	CCDC77	protein_coding	coiled-coil domain containing 77 [Source:HGNC Symbol;Acc:HGNC:28203]
ENSG00000120690.15	ELF1	protein_coding	E74 like ETS transcription factor 1 [Source:HGNC Symbol;Acc:HGNC:3316]
ENSG00000120756.12	PLS1	protein_coding	plastin 1 [Source:HGNC Symbol;Acc:HGNC:9090]
ENSG00000120800.4	UTP20	protein_coding	UTP20, small subunit processome component [Source:HGNC Symbol;Acc:HGNC:17897]
ENSG00000120833.13	SOCS2	protein_coding	suppressor of cytokine signaling 2 [Source:HGNC Symbol;Acc:HGNC:19382]
ENSG00000121067.17	SPOP	protein_coding	speckle type BTB/POZ protein [Source:HGNC Symbol;Acc:HGNC:11254]
ENSG00000121101.15	TEX14	protein_coding	testis expressed 14, intercellular bridge forming factor [Source:HGNC Symbol;Acc:HGNC:11737]
ENSG00000121289.17	CEP89	protein_coding	centrosomal protein 89 [Source:HGNC Symbol;Acc:HGNC:25907]
ENSG00000121481.10	RNF2	protein_coding	ring finger protein 2 [Source:HGNC Symbol;Acc:HGNC:10061]
ENSG00000121552.3	CSTA	protein_coding	cystatin A [Source:HGNC Symbol;Acc:HGNC:2481]
ENSG00000121671.11	CRY2	protein_coding	cryptochrome circadian clock 2 [Source:HGNC Symbol;Acc:HGNC:2385]
ENSG00000121988.17	ZRANB3	protein_coding	zinc finger RANBP2-type containing 3 [Source:HGNC Symbol;Acc:HGNC:25249]
ENSG00000121989.14	ACVR2A	protein_coding	activin A receptor type 2A [Source:HGNC Symbol;Acc:HGNC:173]
ENSG00000122085.16	MTERF4	protein_coding	mitochondrial transcription termination factor 4 [Source:HGNC Symbol;Acc:HGNC:28785]
ENSG00000122203.14	KIAA1191	protein_coding	KIAA1191 [Source:HGNC Symbol;Acc:HGNC:29209]
ENSG00000122641.10	INHBA	protein_coding	inhibin beta A subunit [Source:HGNC Symbol;Acc:HGNC:6066]
ENSG00000122674.11	CCZ1	protein_coding	CCZ1 homolog, vacuolar protein trafficking and biogenesis associated [Source:HGNC Symbol;Acc:HGNC:21691]
ENSG00000122882.10	ECD	protein_coding	ecdysoneless cell cycle regulator [Source:HGNC Symbol;Acc:HGNC:17029]
ENSG00000122970.15	IFT81	protein_coding	intraflagellar transport 81 [Source:HGNC Symbol;Acc:HGNC:14313]
ENSG00000123080.10	CDKN2C	protein_coding	cyclin dependent kinase inhibitor 2C [Source:HGNC Symbol;Acc:HGNC:1789]
ENSG00000123178.14	SPRYD7	protein_coding	SPRY domain containing 7 [Source:HGNC Symbol;Acc:HGNC:14297]
ENSG00000123191.14	ATP7B	protein_coding	ATPase copper transporting beta [Source:HGNC Symbol;Acc:HGNC:870]
ENSG00000123342.15	MMP19	protein_coding	matrix metallopeptidase 19 [Source:HGNC Symbol;Acc:HGNC:7165]
ENSG00000123349.13	PFDN5	protein_coding	prefoldin subunit 5 [Source:HGNC Symbol;Acc:HGNC:8869]
ENSG00000123411.14	IKZF4	protein_coding	IKAROS family zinc finger 4 [Source:HGNC Symbol;Acc:HGNC:13179]
ENSG00000123473.15	STIL	protein_coding	STIL, centriolar assembly protein [Source:HGNC Symbol;Acc:HGNC:10879]
ENSG00000123739.10	PLA2G12A	protein_coding	phospholipase A2 group XIIA [Source:HGNC Symbol;Acc:HGNC:18554]
ENSG00000123836.14	PFKFB2	protein_coding	6-phosphofructo-2-kinase/fructose-2,6-biphosphatase 2 [Source:HGNC Symbol;Acc:HGNC:8873]
ENSG00000124074.11	ENKD1	protein_coding	enkurin domain containing 1 [Source:HGNC Symbol;Acc:HGNC:25246]
ENSG00000124104.18	SNX21	protein_coding	sorting nexin family member 21 [Source:HGNC Symbol;Acc:HGNC:16154]
ENSG00000124155.17	PIGT	protein_coding	phosphatidylinositol glycan anchor biosynthesis class T [Source:HGNC Symbol;Acc:HGNC:14938]
ENSG00000124222.22	STX16	protein_coding	syntaxin 16 [Source:HGNC Symbol;Acc:HGNC:11431]
ENSG00000124313.13	IQSEC2	protein_coding	IQ motif and Sec7 domain 2 [Source:HGNC Symbol;Acc:HGNC:29059]
ENSG00000124574.14	ABCC10	protein_coding	ATP binding cassette subfamily C member 10 [Source:HGNC Symbol;Acc:HGNC:52]
ENSG00000124587.13	PEX6	protein_coding	peroxisomal biogenesis factor 6 [Source:HGNC Symbol;Acc:HGNC:8859]
ENSG00000124608.4	AARS2	protein_coding	alanyl-tRNA synthetase 2, mitochondrial [Source:HGNC Symbol;Acc:HGNC:21022]
ENSG00000124664.10	SPDEF	protein_coding	SAM pointed domain containing ETS transcription factor [Source:HGNC Symbol;Acc:HGNC:17257]
ENSG00000124743.5	KLHL31	protein_coding	kelch like family member 31 [Source:HGNC Symbol;Acc:HGNC:21353]
ENSG00000125247.15	TMTC4	protein_coding	transmembrane and tetratricopeptide repeat containing 4 [Source:HGNC Symbol;Acc:HGNC:25904]
ENSG00000125445.10	MRPS7	protein_coding	mitochondrial ribosomal protein S7 [Source:HGNC Symbol;Acc:HGNC:14499]
ENSG00000125637.15	PSD4	protein_coding	pleckstrin and Sec7 domain containing 4 [Source:HGNC Symbol;Acc:HGNC:19096]
ENSG00000125755.18	SYMPK	protein_coding	symplekin [Source:HGNC Symbol;Acc:HGNC:22935]
ENSG00000125843.10	AP5S1	protein_coding	adaptor related protein complex 5 sigma 1 subunit [Source:HGNC Symbol;Acc:HGNC:15875]
ENSG00000125844.15	RRBP1	protein_coding	ribosome binding protein 1 [Source:HGNC Symbol;Acc:HGNC:10448]
ENSG00000125912.10	NCLN	protein_coding	nicalin [Source:HGNC Symbol;Acc:HGNC:26923]
ENSG00000126391.13	FRMD8	protein_coding	FERM domain containing 8 [Source:HGNC Symbol;Acc:HGNC:25462]
ENSG00000126453.9	BCL2L12	protein_coding	BCL2 like 12 [Source:HGNC Symbol;Acc:HGNC:13787]
ENSG00000126773.12	PCNX4	protein_coding	pecanex homolog 4 [Source:HGNC Symbol;Acc:HGNC:20349]
ENSG00000126883.16	NUP214	protein_coding	nucleoporin 214 [Source:HGNC Symbol;Acc:HGNC:8064]
ENSG00000126934.13	MAP2K2	protein_coding	mitogen-activated protein kinase kinase 2 [Source:HGNC Symbol;Acc:HGNC:6842]
ENSG00000127054.20	INTS11	protein_coding	integrator complex subunit 11 [Source:HGNC Symbol;Acc:HGNC:26052]
ENSG00000127452.8	FBXL12	protein_coding	F-box and leucine rich repeat protein 12 [Source:HGNC Symbol;Acc:HGNC:13611]
ENSG00000127511.9	SIN3B	protein_coding	SIN3 transcription regulator family member B [Source:HGNC Symbol;Acc:HGNC:19354]
ENSG00000127564.16	PKMYT1	protein_coding	protein kinase, membrane associated tyrosine/threonine 1 [Source:HGNC Symbol;Acc:HGNC:29650]
ENSG00000127946.16	HIP1	protein_coding	huntingtin interacting protein 1 [Source:HGNC Symbol;Acc:HGNC:4913]
ENSG00000127952.16	STYXL1	protein_coding	serine/threonine/tyrosine interacting like 1 [Source:HGNC Symbol;Acc:HGNC:18165]
ENSG00000127980.15	PEX1	protein_coding	peroxisomal biogenesis factor 1 [Source:HGNC Symbol;Acc:HGNC:8850]
ENSG00000128271.21	ADORA2A	protein_coding	adenosine A2a receptor [Source:HGNC Symbol;Acc:HGNC:263]
ENSG00000128309.16	MPST	protein_coding	mercaptopyruvate sulfurtransferase [Source:HGNC Symbol;Acc:HGNC:7223]
ENSG00000128422.15	KRT17	protein_coding	keratin 17 [Source:HGNC Symbol;Acc:HGNC:6427]
ENSG00000128534.7	LSM8	protein_coding	LSM8 homolog, U6 small nuclear RNA associated [Source:HGNC Symbol;Acc:HGNC:20471]
ENSG00000128573.24	FOXP2	protein_coding	forkhead box P2 [Source:HGNC Symbol;Acc:HGNC:13875]
ENSG00000128595.16	CALU	protein_coding	calumenin [Source:HGNC Symbol;Acc:HGNC:1458]
ENSG00000128891.15	CCDC32	protein_coding	coiled-coil domain containing 32 [Source:HGNC Symbol;Acc:HGNC:28295]
ENSG00000128923.10	MINDY2	protein_coding	MINDY lysine 48 deubiquitinase 2 [Source:HGNC Symbol;Acc:HGNC:26954]
ENSG00000128973.12	CLN6	protein_coding	CLN6, transmembrane ER protein [Source:HGNC Symbol;Acc:HGNC:2077]
ENSG00000129071.9	MBD4	protein_coding	methyl-CpG binding domain 4, DNA glycosylase [Source:HGNC Symbol;Acc:HGNC:6919]
ENSG00000129235.10	TXNDC17	protein_coding	thioredoxin domain containing 17 [Source:HGNC Symbol;Acc:HGNC:28218]
ENSG00000129255.15	MPDU1	protein_coding	mannose-P-dolichol utilization defect 1 [Source:HGNC Symbol;Acc:HGNC:7207]
ENSG00000129521.13	EGLN3	protein_coding	egl-9 family hypoxia inducible factor 3 [Source:HGNC Symbol;Acc:HGNC:14661]
ENSG00000129535.12	NRL	protein_coding	neural retina leucine zipper [Source:HGNC Symbol;Acc:HGNC:8002]
ENSG00000129682.15	FGF13	protein_coding	fibroblast growth factor 13 [Source:HGNC Symbol;Acc:HGNC:3670]
ENSG00000130164.13	LDLR	protein_coding	low density lipoprotein receptor [Source:HGNC Symbol;Acc:HGNC:6547]
ENSG00000130299.16	GTPBP3	protein_coding	GTP binding protein 3 (mitochondrial) [Source:HGNC Symbol;Acc:HGNC:14880]
ENSG00000130304.16	SLC27A1	protein_coding	solute carrier family 27 member 1 [Source:HGNC Symbol;Acc:HGNC:10995]
ENSG00000130305.16	NSUN5	protein_coding	NOP2/Sun RNA methyltransferase family member 5 [Source:HGNC Symbol;Acc:HGNC:16385]
ENSG00000130517.13	PGPEP1	protein_coding	pyroglutamyl-peptidase I [Source:HGNC Symbol;Acc:HGNC:13568]
ENSG00000130559.18	CAMSAP1	protein_coding	calmodulin regulated spectrin associated protein 1 [Source:HGNC Symbol;Acc:HGNC:19946]
ENSG00000130702.15	LAMA5	protein_coding	laminin subunit alpha 5 [Source:HGNC Symbol;Acc:HGNC:6485]
ENSG00000130714.15	POMT1	protein_coding	protein O-mannosyltransferase 1 [Source:HGNC Symbol;Acc:HGNC:9202]
ENSG00000130725.7	UBE2M	protein_coding	ubiquitin conjugating enzyme E2 M [Source:HGNC Symbol;Acc:HGNC:12491]
ENSG00000130731.15	METTL26	protein_coding	methyltransferase like 26 [Source:HGNC Symbol;Acc:HGNC:14141]
ENSG00000130939.18	UBE4B	protein_coding	ubiquitination factor E4B [Source:HGNC Symbol;Acc:HGNC:12500]
ENSG00000131037.14	EPS8L1	protein_coding	EPS8 like 1 [Source:HGNC Symbol;Acc:HGNC:21295]
ENSG00000131051.22	RBM39	protein_coding	RNA binding motif protein 39 [Source:HGNC Symbol;Acc:HGNC:15923]
ENSG00000131269.15	ABCB7	protein_coding	ATP binding cassette subfamily B member 7 [Source:HGNC Symbol;Acc:HGNC:48]
ENSG00000131408.13	NR1H2	protein_coding	nuclear receptor subfamily 1 group H member 2 [Source:HGNC Symbol;Acc:HGNC:7965]
ENSG00000131467.10	PSME3	protein_coding	proteasome activator subunit 3 [Source:HGNC Symbol;Acc:HGNC:9570]
ENSG00000131697.17	NPHP4	protein_coding	nephrocystin 4 [Source:HGNC Symbol;Acc:HGNC:19104]
ENSG00000131725.13	WDR44	protein_coding	WD repeat domain 44 [Source:HGNC Symbol;Acc:HGNC:30512]
ENSG00000131732.11	ZCCHC9	protein_coding	zinc finger CCHC-type containing 9 [Source:HGNC Symbol;Acc:HGNC:25424]
ENSG00000131788.15	PIAS3	protein_coding	protein inhibitor of activated STAT 3 [Source:HGNC Symbol;Acc:HGNC:16861]
ENSG00000131844.15	MCCC2	protein_coding	methylcrotonoyl-CoA carboxylase 2 [Source:HGNC Symbol;Acc:HGNC:6937]
ENSG00000131943.17	C19orf12	protein_coding	chromosome 19 open reading frame 12 [Source:HGNC Symbol;Acc:HGNC:25443]
ENSG00000131981.15	LGALS3	protein_coding	galectin 3 [Source:HGNC Symbol;Acc:HGNC:6563]
ENSG00000132256.18	TRIM5	protein_coding	tripartite motif containing 5 [Source:HGNC Symbol;Acc:HGNC:16276]
ENSG00000132356.11	PRKAA1	protein_coding	protein kinase AMP-activated catalytic subunit alpha 1 [Source:HGNC Symbol;Acc:HGNC:9376]
ENSG00000132470.13	ITGB4	protein_coding	integrin subunit beta 4 [Source:HGNC Symbol;Acc:HGNC:6158]
ENSG00000132530.16	XAF1	protein_coding	XIAP associated factor 1 [Source:HGNC Symbol;Acc:HGNC:30932]
ENSG00000132535.18	DLG4	protein_coding	discs large MAGUK scaffold protein 4 [Source:HGNC Symbol;Acc:HGNC:2903]
ENSG00000132563.15	REEP2	protein_coding	receptor accessory protein 2 [Source:HGNC Symbol;Acc:HGNC:17975]
ENSG00000132600.16	PRMT7	protein_coding	protein arginine methyltransferase 7 [Source:HGNC Symbol;Acc:HGNC:25557]
ENSG00000132677.12	RHBG	protein_coding	Rh family B glycoprotein (gene/pseudogene) [Source:HGNC Symbol;Acc:HGNC:14572]
ENSG00000132716.18	DCAF8	protein_coding	DDB1 and CUL4 associated factor 8 [Source:HGNC Symbol;Acc:HGNC:24891]
ENSG00000132780.16	NASP	protein_coding	nuclear autoantigenic sperm protein [Source:HGNC Symbol;Acc:HGNC:7644]
ENSG00000132781.17	MUTYH	protein_coding	mutY DNA glycosylase [Source:HGNC Symbol;Acc:HGNC:7527]
ENSG00000132842.13	AP3B1	protein_coding	adaptor related protein complex 3 beta 1 subunit [Source:HGNC Symbol;Acc:HGNC:566]
ENSG00000132906.17	CASP9	protein_coding	caspase 9 [Source:HGNC Symbol;Acc:HGNC:1511]
ENSG00000132950.18	ZMYM5	protein_coding	zinc finger MYM-type containing 5 [Source:HGNC Symbol;Acc:HGNC:13029]
ENSG00000133027.17	PEMT	protein_coding	phosphatidylethanolamine N-methyltransferase [Source:HGNC Symbol;Acc:HGNC:8830]
ENSG00000133134.11	BEX2	protein_coding	brain expressed X-linked 2 [Source:HGNC Symbol;Acc:HGNC:30933]
ENSG00000133142.17	TCEAL4	protein_coding	transcription elongation factor A like 4 [Source:HGNC Symbol;Acc:HGNC:26121]
ENSG00000133318.13	RTN3	protein_coding	reticulon 3 [Source:HGNC Symbol;Acc:HGNC:10469]
ENSG00000133398.3	MED10	protein_coding	mediator complex subunit 10 [Source:HGNC Symbol;Acc:HGNC:28760]
ENSG00000133641.17	C12orf29	protein_coding	chromosome 12 open reading frame 29 [Source:HGNC Symbol;Acc:HGNC:25322]
ENSG00000133703.11	KRAS	protein_coding	KRAS proto-oncogene, GTPase [Source:HGNC Symbol;Acc:HGNC:6407]
ENSG00000133773.11	CCDC59	protein_coding	coiled-coil domain containing 59 [Source:HGNC Symbol;Acc:HGNC:25005]
ENSG00000133805.15	AMPD3	protein_coding	adenosine monophosphate deaminase 3 [Source:HGNC Symbol;Acc:HGNC:470]
ENSG00000133812.15	SBF2	protein_coding	SET binding factor 2 [Source:HGNC Symbol;Acc:HGNC:2135]
ENSG00000133818.13	RRAS2	protein_coding	related RAS viral (r-ras) oncogene homolog 2 [Source:HGNC Symbol;Acc:HGNC:17271]
ENSG00000133858.15	ZFC3H1	protein_coding	zinc finger C3H1-type containing [Source:HGNC Symbol;Acc:HGNC:28328]
ENSG00000133961.19	NUMB	protein_coding	NUMB, endocytic adaptor protein [Source:HGNC Symbol;Acc:HGNC:8060]
ENSG00000134058.11	CDK7	protein_coding	cyclin dependent kinase 7 [Source:HGNC Symbol;Acc:HGNC:1778]
ENSG00000134152.10	KATNBL1	protein_coding	katanin regulatory subunit B1 like 1 [Source:HGNC Symbol;Acc:HGNC:26199]
ENSG00000134248.13	LAMTOR5	protein_coding	late endosomal/lysosomal adaptor, MAPK and MTOR activator 5 [Source:HGNC Symbol;Acc:HGNC:17955]
ENSG00000134255.13	CEPT1	protein_coding	choline/ethanolamine phosphotransferase 1 [Source:HGNC Symbol;Acc:HGNC:24289]
ENSG00000134283.17	PPHLN1	protein_coding	periphilin 1 [Source:HGNC Symbol;Acc:HGNC:19369]
ENSG00000134452.19	FBXO18	protein_coding	F-box protein, helicase, 18 [Source:HGNC Symbol;Acc:HGNC:13620]
ENSG00000134533.6	RERG	protein_coding	RAS like estrogen regulated growth inhibitor [Source:HGNC Symbol;Acc:HGNC:15980]
ENSG00000134602.15	STK26	protein_coding	serine/threonine kinase 26 [Source:HGNC Symbol;Acc:HGNC:18174]
ENSG00000134709.10	HOOK1	protein_coding	hook microtubule tethering protein 1 [Source:HGNC Symbol;Acc:HGNC:19884]
ENSG00000134824.13	FADS2	protein_coding	fatty acid desaturase 2 [Source:HGNC Symbol;Acc:HGNC:3575]
ENSG00000134852.14	CLOCK	protein_coding	clock circadian regulator [Source:HGNC Symbol;Acc:HGNC:2082]
ENSG00000134864.10	GGACT	protein_coding	gamma-glutamylamine cyclotransferase [Source:HGNC Symbol;Acc:HGNC:25100]
ENSG00000134882.15	UBAC2	protein_coding	UBA domain containing 2 [Source:HGNC Symbol;Acc:HGNC:20486]
ENSG00000134909.18	ARHGAP32	protein_coding	Rho GTPase activating protein 32 [Source:HGNC Symbol;Acc:HGNC:17399]
ENSG00000134986.13	NREP	protein_coding	neuronal regeneration related protein [Source:HGNC Symbol;Acc:HGNC:16834]
ENSG00000134987.11	WDR36	protein_coding	WD repeat domain 36 [Source:HGNC Symbol;Acc:HGNC:30696]
ENSG00000135090.13	TAOK3	protein_coding	TAO kinase 3 [Source:HGNC Symbol;Acc:HGNC:18133]
ENSG00000135297.15	MTO1	protein_coding	mitochondrial tRNA translation optimization 1 [Source:HGNC Symbol;Acc:HGNC:19261]
ENSG00000135446.16	CDK4	protein_coding	cyclin dependent kinase 4 [Source:HGNC Symbol;Acc:HGNC:1773]
ENSG00000135454.13	B4GALNT1	protein_coding	beta-1,4-N-acetyl-galactosaminyltransferase 1 [Source:HGNC Symbol;Acc:HGNC:4117]
ENSG00000135506.15	OS9	protein_coding	OS9, endoplasmic reticulum lectin [Source:HGNC Symbol;Acc:HGNC:16994]
ENSG00000135541.20	AHI1	protein_coding	Abelson helper integration site 1 [Source:HGNC Symbol;Acc:HGNC:21575]
ENSG00000135622.12	SEMA4F	protein_coding	ssemaphorin 4F [Source:HGNC Symbol;Acc:HGNC:10734]
ENSG00000135709.12	KIAA0513	protein_coding	KIAA0513 [Source:HGNC Symbol;Acc:HGNC:29058]
ENSG00000135775.13	COG2	protein_coding	component of oligomeric golgi complex 2 [Source:HGNC Symbol;Acc:HGNC:6546]
ENSG00000135778.11	NTPCR	protein_coding	nucleoside-triphosphatase, cancer-related [Source:HGNC Symbol;Acc:HGNC:28204]
ENSG00000135912.10	TTLL4	protein_coding	tubulin tyrosine ligase like 4 [Source:HGNC Symbol;Acc:HGNC:28976]
ENSG00000135913.10	USP37	protein_coding	ubiquitin specific peptidase 37 [Source:HGNC Symbol;Acc:HGNC:20063]
ENSG00000136003.15	ISCU	protein_coding	iron-sulfur cluster assembly enzyme [Source:HGNC Symbol;Acc:HGNC:29882]
ENSG00000136104.19	RNASEH2B	protein_coding	ribonuclease H2 subunit B [Source:HGNC Symbol;Acc:HGNC:25671]
ENSG00000136141.14	LRCH1	protein_coding	leucine rich repeats and calponin homology domain containing 1 [Source:HGNC Symbol;Acc:HGNC:20309]
ENSG00000136143.14	SUCLA2	protein_coding	succinate-CoA ligase ADP-forming beta subunit [Source:HGNC Symbol;Acc:HGNC:11448]
ENSG00000136152.14	COG3	protein_coding	component of oligomeric golgi complex 3 [Source:HGNC Symbol;Acc:HGNC:18619]
ENSG00000136169.16	SETDB2	protein_coding	SET domain bifurcated 2 [Source:HGNC Symbol;Acc:HGNC:20263]
ENSG00000136261.14	BZW2	protein_coding	basic leucine zipper and W2 domains 2 [Source:HGNC Symbol;Acc:HGNC:18808]
ENSG00000136463.7	TACO1	protein_coding	translational activator of cytochrome c oxidase I [Source:HGNC Symbol;Acc:HGNC:24316]
ENSG00000136478.7	TEX2	protein_coding	testis expressed 2 [Source:HGNC Symbol;Acc:HGNC:30884]
ENSG00000136628.17	EPRS	protein_coding	glutamyl-prolyl-tRNA synthetase [Source:HGNC Symbol;Acc:HGNC:3418]
ENSG00000136631.12	VPS45	protein_coding	vacuolar protein sorting 45 homolog [Source:HGNC Symbol;Acc:HGNC:14579]
ENSG00000136709.11	WDR33	protein_coding	WD repeat domain 33 [Source:HGNC Symbol;Acc:HGNC:25651]
ENSG00000136754.17	ABI1	protein_coding	abl interactor 1 [Source:HGNC Symbol;Acc:HGNC:11320]
ENSG00000136802.11	LRRC8A	protein_coding	leucine rich repeat containing 8 family member A [Source:HGNC Symbol;Acc:HGNC:19027]
ENSG00000137074.18	APTX	protein_coding	aprataxin [Source:HGNC Symbol;Acc:HGNC:15984]
ENSG00000137075.17	RNF38	protein_coding	ring finger protein 38 [Source:HGNC Symbol;Acc:HGNC:18052]
ENSG00000137133.10	HINT2	protein_coding	histidine triad nucleotide binding protein 2 [Source:HGNC Symbol;Acc:HGNC:18344]
ENSG00000137207.11	YIPF3	protein_coding	Yip1 domain family member 3 [Source:HGNC Symbol;Acc:HGNC:21023]
ENSG00000137404.14	NRM	protein_coding	nurim (nuclear envelope membrane protein) [Source:HGNC Symbol;Acc:HGNC:8003]
ENSG00000137449.15	CPEB2	protein_coding	cytoplasmic polyadenylation element binding protein 2 [Source:HGNC Symbol;Acc:HGNC:21745]
ENSG00000137494.13	ANKRD42	protein_coding	ankyrin repeat domain 42 [Source:HGNC Symbol;Acc:HGNC:26752]
ENSG00000137502.9	RAB30	protein_coding	RAB30, member RAS oncogene family [Source:HGNC Symbol;Acc:HGNC:9770]
ENSG00000137573.13	SULF1	protein_coding	sulfatase 1 [Source:HGNC Symbol;Acc:HGNC:20391]
ENSG00000137601.16	NEK1	protein_coding	NIMA related kinase 1 [Source:HGNC Symbol;Acc:HGNC:7744]
ENSG00000137747.15	TMPRSS13	protein_coding	transmembrane protease, serine 13 [Source:HGNC Symbol;Acc:HGNC:29808]
ENSG00000137760.14	ALKBH8	protein_coding	alkB homolog 8, tRNA methyltransferase [Source:HGNC Symbol;Acc:HGNC:25189]
ENSG00000137776.16	SLTM	protein_coding	SAFB like transcription modulator [Source:HGNC Symbol;Acc:HGNC:20709]
ENSG00000137806.8	NDUFAF1	protein_coding	NADH:ubiquinone oxidoreductase complex assembly factor 1 [Source:HGNC Symbol;Acc:HGNC:18828]
ENSG00000137871.19	ZNF280D	protein_coding	zinc finger protein 280D [Source:HGNC Symbol;Acc:HGNC:25953]
ENSG00000137942.16	FNBP1L	protein_coding	formin binding protein 1 like [Source:HGNC Symbol;Acc:HGNC:20851]
ENSG00000138030.12	KHK	protein_coding	ketohexokinase [Source:HGNC Symbol;Acc:HGNC:6315]
ENSG00000138050.14	THUMPD2	protein_coding	THUMP domain containing 2 [Source:HGNC Symbol;Acc:HGNC:14890]
ENSG00000138119.16	MYOF	protein_coding	myoferlin [Source:HGNC Symbol;Acc:HGNC:3656]
ENSG00000138413.13	IDH1	protein_coding	isocitrate dehydrogenase (NADP(+)) 1, cytosolic [Source:HGNC Symbol;Acc:HGNC:5382]
ENSG00000138430.15	OLA1	protein_coding	Obg like ATPase 1 [Source:HGNC Symbol;Acc:HGNC:28833]
ENSG00000138496.16	PARP9	protein_coding	poly(ADP-ribose) polymerase family member 9 [Source:HGNC Symbol;Acc:HGNC:24118]
ENSG00000138593.8	SECISBP2L	protein_coding	SECIS binding protein 2 like [Source:HGNC Symbol;Acc:HGNC:28997]
ENSG00000138613.13	APH1B	protein_coding	aph-1 homolog B, gamma-secretase subunit [Source:HGNC Symbol;Acc:HGNC:24080]
ENSG00000138670.17	RASGEF1B	protein_coding	RasGEF domain family member 1B [Source:HGNC Symbol;Acc:HGNC:24881]
ENSG00000138686.9	BBS7	protein_coding	Bardet-Biedl syndrome 7 [Source:HGNC Symbol;Acc:HGNC:18758]
ENSG00000138698.14	RAP1GDS1	protein_coding	Rap1 GTPase-GDP dissociation stimulator 1 [Source:HGNC Symbol;Acc:HGNC:9859]
ENSG00000138750.14	NUP54	protein_coding	nucleoporin 54 [Source:HGNC Symbol;Acc:HGNC:17359]
ENSG00000138794.9	CASP6	protein_coding	caspase 6 [Source:HGNC Symbol;Acc:HGNC:1507]
ENSG00000138796.16	HADH	protein_coding	hydroxyacyl-CoA dehydrogenase [Source:HGNC Symbol;Acc:HGNC:4799]
ENSG00000138798.11	EGF	protein_coding	epidermal growth factor [Source:HGNC Symbol;Acc:HGNC:3229]
ENSG00000138835.22	RGS3	protein_coding	regulator of G protein signaling 3 [Source:HGNC Symbol;Acc:HGNC:9999]
ENSG00000139160.13	ETFBKMT	protein_coding	electron transfer flavoprotein beta subunit lysine methyltransferase [Source:HGNC Symbol;Acc:HGNC:28739]
ENSG00000139318.7	DUSP6	protein_coding	dual specificity phosphatase 6 [Source:HGNC Symbol;Acc:HGNC:3072]
ENSG00000139323.13	POC1B	protein_coding	POC1 centriolar protein B [Source:HGNC Symbol;Acc:HGNC:30836]
ENSG00000139324.11	TMTC3	protein_coding	transmembrane and tetratricopeptide repeat containing 3 [Source:HGNC Symbol;Acc:HGNC:26899]
ENSG00000139370.11	SLC15A4	protein_coding	solute carrier family 15 member 4 [Source:HGNC Symbol;Acc:HGNC:23090]
ENSG00000139405.15	RITA1	protein_coding	RBPJ interacting and tubulin associated 1 [Source:HGNC Symbol;Acc:HGNC:25925]
ENSG00000139531.12	SUOX	protein_coding	sulfite oxidase [Source:HGNC Symbol;Acc:HGNC:11460]
ENSG00000139636.15	LMBR1L	protein_coding	limb development membrane protein 1 like [Source:HGNC Symbol;Acc:HGNC:18268]
ENSG00000139679.15	LPAR6	protein_coding	lysophosphatidic acid receptor 6 [Source:HGNC Symbol;Acc:HGNC:15520]
ENSG00000139793.18	MBNL2	protein_coding	muscleblind like splicing regulator 2 [Source:HGNC Symbol;Acc:HGNC:16746]
ENSG00000139926.15	FRMD6	protein_coding	FERM domain containing 6 [Source:HGNC Symbol;Acc:HGNC:19839]
ENSG00000140025.15	EFCAB11	protein_coding	EF-hand calcium binding domain 11 [Source:HGNC Symbol;Acc:HGNC:20357]
ENSG00000140104.13	C14orf79	protein_coding	chromosome 14 open reading frame 79 [Source:HGNC Symbol;Acc:HGNC:20126]
ENSG00000140153.17	WDR20	protein_coding	WD repeat domain 20 [Source:HGNC Symbol;Acc:HGNC:19667]
ENSG00000140299.11	BNIP2	protein_coding	BCL2 interacting protein 2 [Source:HGNC Symbol;Acc:HGNC:1083]
ENSG00000140326.12	CDAN1	protein_coding	codanin 1 [Source:HGNC Symbol;Acc:HGNC:1713]
ENSG00000140332.15	TLE3	protein_coding	transducin like enhancer of split 3 [Source:HGNC Symbol;Acc:HGNC:11839]
ENSG00000140403.12	DNAJA4	protein_coding	DnaJ heat shock protein family (Hsp40) member A4 [Source:HGNC Symbol;Acc:HGNC:14885]
ENSG00000140416.19	TPM1	protein_coding	tropomyosin 1 [Source:HGNC Symbol;Acc:HGNC:12010]
ENSG00000140455.16	USP3	protein_coding	ubiquitin specific peptidase 3 [Source:HGNC Symbol;Acc:HGNC:12626]
ENSG00000140464.19	PML	protein_coding	promyelocytic leukemia [Source:HGNC Symbol;Acc:HGNC:9113]
ENSG00000140848.16	CPNE2	protein_coding	copine 2 [Source:HGNC Symbol;Acc:HGNC:2315]
ENSG00000140992.18	PDPK1	protein_coding	3-phosphoinositide dependent protein kinase 1 [Source:HGNC Symbol;Acc:HGNC:8816]
ENSG00000140995.16	DEF8	protein_coding	differentially expressed in FDCP 8 homolog [Source:HGNC Symbol;Acc:HGNC:25969]
ENSG00000141258.12	SGSM2	protein_coding	small G protein signaling modulator 2 [Source:HGNC Symbol;Acc:HGNC:29026]
ENSG00000141298.17	SSH2	protein_coding	slingshot protein phosphatase 2 [Source:HGNC Symbol;Acc:HGNC:30580]
ENSG00000141376.22	BCAS3	protein_coding	BCAS3, microtubule associated cell migration factor [Source:HGNC Symbol;Acc:HGNC:14347]
ENSG00000141401.11	IMPA2	protein_coding	inositol monophosphatase 2 [Source:HGNC Symbol;Acc:HGNC:6051]
ENSG00000141428.16	C18orf21	protein_coding	chromosome 18 open reading frame 21 [Source:HGNC Symbol;Acc:HGNC:28802]
ENSG00000141448.8	GATA6	protein_coding	GATA binding protein 6 [Source:HGNC Symbol;Acc:HGNC:4174]
ENSG00000141551.14	CSNK1D	protein_coding	casein kinase 1 delta [Source:HGNC Symbol;Acc:HGNC:2452]
ENSG00000141568.20	FOXK2	protein_coding	forkhead box K2 [Source:HGNC Symbol;Acc:HGNC:6036]
ENSG00000141622.13	RNF165	protein_coding	ring finger protein 165 [Source:HGNC Symbol;Acc:HGNC:31696]
ENSG00000141905.18	NFIC	protein_coding	nuclear factor I C [Source:HGNC Symbol;Acc:HGNC:7786]
ENSG00000141971.12	MVB12A	protein_coding	multivesicular body subunit 12A [Source:HGNC Symbol;Acc:HGNC:25153]
ENSG00000142546.13	NOSIP	protein_coding	nitric oxide synthase interacting protein [Source:HGNC Symbol;Acc:HGNC:17946]
ENSG00000142794.18	NBPF3	protein_coding	NBPF member 3 [Source:HGNC Symbol;Acc:HGNC:25076]
ENSG00000142892.14	PIGK	protein_coding	phosphatidylinositol glycan anchor biosynthesis class K [Source:HGNC Symbol;Acc:HGNC:8965]
ENSG00000142949.16	PTPRF	protein_coding	protein tyrosine phosphatase, receptor type F [Source:HGNC Symbol;Acc:HGNC:9670]
ENSG00000143033.17	MTF2	protein_coding	metal response element binding transcription factor 2 [Source:HGNC Symbol;Acc:HGNC:29535]
ENSG00000143179.14	UCK2	protein_coding	uridine-cytidine kinase 2 [Source:HGNC Symbol;Acc:HGNC:12562]
ENSG00000143258.15	USP21	protein_coding	ubiquitin specific peptidase 21 [Source:HGNC Symbol;Acc:HGNC:12620]
ENSG00000143353.11	LYPLAL1	protein_coding	lysophospholipase like 1 [Source:HGNC Symbol;Acc:HGNC:20440]
ENSG00000143373.17	ZNF687	protein_coding	zinc finger protein 687 [Source:HGNC Symbol;Acc:HGNC:29277]
ENSG00000143393.16	PI4KB	protein_coding	phosphatidylinositol 4-kinase beta [Source:HGNC Symbol;Acc:HGNC:8984]
ENSG00000143401.14	ANP32E	protein_coding	acidic nuclear phosphoprotein 32 family member E [Source:HGNC Symbol;Acc:HGNC:16673]
ENSG00000143409.15	MINDY1	protein_coding	MINDY lysine 48 deubiquitinase 1 [Source:HGNC Symbol;Acc:HGNC:25648]
ENSG00000143494.15	VASH2	protein_coding	vasohibin 2 [Source:HGNC Symbol;Acc:HGNC:25723]
ENSG00000143514.16	TP53BP2	protein_coding	tumor protein p53 binding protein 2 [Source:HGNC Symbol;Acc:HGNC:12000]
ENSG00000143515.16	ATP8B2	protein_coding	ATPase phospholipid transporting 8B2 [Source:HGNC Symbol;Acc:HGNC:13534]
ENSG00000143569.18	UBAP2L	protein_coding	ubiquitin associated protein 2 like [Source:HGNC Symbol;Acc:HGNC:29877]
ENSG00000143630.9	HCN3	protein_coding	hyperpolarization activated cyclic nucleotide gated potassium channel 3 [Source:HGNC Symbol;Acc:HGNC:19183]
ENSG00000143748.17	NVL	protein_coding	nuclear VCP-like [Source:HGNC Symbol;Acc:HGNC:8070]
ENSG00000143811.18	PYCR2	protein_coding	pyrroline-5-carboxylate reductase 2 [Source:HGNC Symbol;Acc:HGNC:30262]
ENSG00000143815.14	LBR	protein_coding	lamin B receptor [Source:HGNC Symbol;Acc:HGNC:6518]
ENSG00000143870.12	PDIA6	protein_coding	protein disulfide isomerase family A member 6 [Source:HGNC Symbol;Acc:HGNC:30168]
ENSG00000144182.16	LIPT1	protein_coding	lipoyltransferase 1 [Source:HGNC Symbol;Acc:HGNC:29569]
ENSG00000144401.14	METTL21A	protein_coding	methyltransferase like 21A [Source:HGNC Symbol;Acc:HGNC:30476]
ENSG00000144445.16	KANSL1L	protein_coding	KAT8 regulatory NSL complex subunit 1 like [Source:HGNC Symbol;Acc:HGNC:26310]
ENSG00000144485.10	HES6	protein_coding	hes family bHLH transcription factor 6 [Source:HGNC Symbol;Acc:HGNC:18254]
ENSG00000144559.10	TAMM41	protein_coding	TAM41 mitochondrial translocator assembly and maintenance homolog [Source:HGNC Symbol;Acc:HGNC:25187]
ENSG00000144674.16	GOLGA4	protein_coding	golgin A4 [Source:HGNC Symbol;Acc:HGNC:4427]
ENSG00000144736.13	SHQ1	protein_coding	SHQ1, H/ACA ribonucleoprotein assembly factor [Source:HGNC Symbol;Acc:HGNC:25543]
ENSG00000144744.16	UBA3	protein_coding	ubiquitin like modifier activating enzyme 3 [Source:HGNC Symbol;Acc:HGNC:12470]
ENSG00000144827.8	ABHD10	protein_coding	abhydrolase domain containing 10 [Source:HGNC Symbol;Acc:HGNC:25656]
ENSG00000144843.11	ADPRH	protein_coding	ADP-ribosylarginine hydrolase [Source:HGNC Symbol;Acc:HGNC:269]
ENSG00000144935.14	TRPC1	protein_coding	transient receptor potential cation channel subfamily C member 1 [Source:HGNC Symbol;Acc:HGNC:12333]
ENSG00000145332.13	KLHL8	protein_coding	kelch like family member 8 [Source:HGNC Symbol;Acc:HGNC:18644]
ENSG00000145348.16	TBCK	protein_coding	TBC1 domain containing kinase [Source:HGNC Symbol;Acc:HGNC:28261]
ENSG00000145349.16	CAMK2D	protein_coding	calcium/calmodulin dependent protein kinase II delta [Source:HGNC Symbol;Acc:HGNC:1462]
ENSG00000145819.15	ARHGAP26	protein_coding	Rho GTPase activating protein 26 [Source:HGNC Symbol;Acc:HGNC:17073]
ENSG00000145860.11	RNF145	protein_coding	ring finger protein 145 [Source:HGNC Symbol;Acc:HGNC:20853]
ENSG00000145912.8	NHP2	protein_coding	NHP2 ribonucleoprotein [Source:HGNC Symbol;Acc:HGNC:14377]
ENSG00000145916.18	RMND5B	protein_coding	required for meiotic nuclear division 5 homolog B [Source:HGNC Symbol;Acc:HGNC:26181]
ENSG00000146063.19	TRIM41	protein_coding	tripartite motif containing 41 [Source:HGNC Symbol;Acc:HGNC:19013]
ENSG00000146083.11	RNF44	protein_coding	ring finger protein 44 [Source:HGNC Symbol;Acc:HGNC:19180]
ENSG00000146267.11	FAXC	protein_coding	failed axon connections homolog [Source:HGNC Symbol;Acc:HGNC:20742]
ENSG00000146963.17	LUC7L2	protein_coding	LUC7 like 2, pre-mRNA splicing factor [Source:HGNC Symbol;Acc:HGNC:21608]
ENSG00000147274.14	RBMX	protein_coding	RNA binding motif protein, X-linked [Source:HGNC Symbol;Acc:HGNC:9910]
ENSG00000147526.19	TACC1	protein_coding	transforming acidic coiled-coil containing protein 1 [Source:HGNC Symbol;Acc:HGNC:11522]
ENSG00000147548.16	NSD3	protein_coding	nuclear receptor binding SET domain protein 3 [Source:HGNC Symbol;Acc:HGNC:12767]
ENSG00000147689.16	FAM83A	protein_coding	family with sequence similarity 83 member A [Source:HGNC Symbol;Acc:HGNC:28210]
ENSG00000147852.15	VLDLR	protein_coding	very low density lipoprotein receptor [Source:HGNC Symbol;Acc:HGNC:12698]
ENSG00000147905.17	ZCCHC7	protein_coding	zinc finger CCHC-type containing 7 [Source:HGNC Symbol;Acc:HGNC:26209]
ENSG00000147955.16	SIGMAR1	protein_coding	sigma non-opioid intracellular receptor 1 [Source:HGNC Symbol;Acc:HGNC:8157]
ENSG00000147996.16	CBWD5	protein_coding	COBW domain containing 5 [Source:HGNC Symbol;Acc:HGNC:24584]
ENSG00000148057.15	IDNK	protein_coding	IDNK, gluconokinase [Source:HGNC Symbol;Acc:HGNC:31367]
ENSG00000148153.13	INIP	protein_coding	INTS3 and NABP interacting protein [Source:HGNC Symbol;Acc:HGNC:24994]
ENSG00000148225.15	WDR31	protein_coding	WD repeat domain 31 [Source:HGNC Symbol;Acc:HGNC:21421]
ENSG00000148335.14	NTMT1	protein_coding	N-terminal Xaa-Pro-Lys N-methyltransferase 1 [Source:HGNC Symbol;Acc:HGNC:23373]
ENSG00000148444.15	COMMD3	protein_coding	COMM domain containing 3 [Source:HGNC Symbol;Acc:HGNC:23332]
ENSG00000148484.17	RSU1	protein_coding	Ras suppressor protein 1 [Source:HGNC Symbol;Acc:HGNC:10464]
ENSG00000148498.15	PARD3	protein_coding	par-3 family cell polarity regulator [Source:HGNC Symbol;Acc:HGNC:16051]
ENSG00000148737.16	TCF7L2	protein_coding	transcription factor 7 like 2 [Source:HGNC Symbol;Acc:HGNC:11641]
ENSG00000149084.12	HSD17B12	protein_coding	hydroxysteroid 17-beta dehydrogenase 12 [Source:HGNC Symbol;Acc:HGNC:18646]
ENSG00000149289.10	ZC3H12C	protein_coding	zinc finger CCCH-type containing 12C [Source:HGNC Symbol;Acc:HGNC:29362]
ENSG00000149476.15	TKFC	protein_coding	triokinase and FMN cyclase [Source:HGNC Symbol;Acc:HGNC:24552]
ENSG00000149489.8	ROM1	protein_coding	retinal outer segment membrane protein 1 [Source:HGNC Symbol;Acc:HGNC:10254]
ENSG00000149554.12	CHEK1	protein_coding	checkpoint kinase 1 [Source:HGNC Symbol;Acc:HGNC:1925]
ENSG00000149716.12	ORAOV1	protein_coding	oral cancer overexpressed 1 [Source:HGNC Symbol;Acc:HGNC:17589]
ENSG00000149809.14	TM7SF2	protein_coding	transmembrane 7 superfamily member 2 [Source:HGNC Symbol;Acc:HGNC:11863]
ENSG00000150054.18	MPP7	protein_coding	membrane palmitoylated protein 7 [Source:HGNC Symbol;Acc:HGNC:26542]
ENSG00000150337.13	FCGR1A	protein_coding	Fc fragment of IgG receptor Ia [Source:HGNC Symbol;Acc:HGNC:3613]
ENSG00000150551.10	LYPD1	protein_coding	LY6/PLAUR domain containing 1 [Source:HGNC Symbol;Acc:HGNC:28431]
ENSG00000150627.15	WDR17	protein_coding	WD repeat domain 17 [Source:HGNC Symbol;Acc:HGNC:16661]
ENSG00000150760.12	DOCK1	protein_coding	dedicator of cytokinesis 1 [Source:HGNC Symbol;Acc:HGNC:2987]
ENSG00000150764.13	DIXDC1	protein_coding	DIX domain containing 1 [Source:HGNC Symbol;Acc:HGNC:23695]
ENSG00000150776.17	C11orf57	protein_coding	chromosome 11 open reading frame 57 [Source:HGNC Symbol;Acc:HGNC:25569]
ENSG00000150961.14	SEC24D	protein_coding	SEC24 homolog D, COPII coat complex component [Source:HGNC Symbol;Acc:HGNC:10706]
ENSG00000150990.7	DHX37	protein_coding	DEAH-box helicase 37 [Source:HGNC Symbol;Acc:HGNC:17210]
ENSG00000150995.18	ITPR1	protein_coding	inositol 1,4,5-trisphosphate receptor type 1 [Source:HGNC Symbol;Acc:HGNC:6180]
ENSG00000151090.17	THRB	protein_coding	thyroid hormone receptor beta [Source:HGNC Symbol;Acc:HGNC:11799]
ENSG00000151148.13	UBE3B	protein_coding	ubiquitin protein ligase E3B [Source:HGNC Symbol;Acc:HGNC:13478]
ENSG00000151239.13	TWF1	protein_coding	twinfilin actin binding protein 1 [Source:HGNC Symbol;Acc:HGNC:9620]
ENSG00000151292.17	CSNK1G3	protein_coding	casein kinase 1 gamma 3 [Source:HGNC Symbol;Acc:HGNC:2456]
ENSG00000151353.14	TMEM18	protein_coding	transmembrane protein 18 [Source:HGNC Symbol;Acc:HGNC:25257]
ENSG00000151366.12	NDUFC2	protein_coding	NADH:ubiquinone oxidoreductase subunit C2 [Source:HGNC Symbol;Acc:HGNC:7706]
ENSG00000151388.10	ADAMTS12	protein_coding	ADAM metallopeptidase with thrombospondin type 1 motif 12 [Source:HGNC Symbol;Acc:HGNC:14605]
ENSG00000151458.11	ANKRD50	protein_coding	ankyrin repeat domain 50 [Source:HGNC Symbol;Acc:HGNC:29223]
ENSG00000151466.11	SCLT1	protein_coding	sodium channel and clathrin linker 1 [Source:HGNC Symbol;Acc:HGNC:26406]
ENSG00000151491.12	EPS8	protein_coding	epidermal growth factor receptor pathway substrate 8 [Source:HGNC Symbol;Acc:HGNC:3420]
ENSG00000151503.12	NCAPD3	protein_coding	non-SMC condensin II complex subunit D3 [Source:HGNC Symbol;Acc:HGNC:28952]
ENSG00000151552.11	QDPR	protein_coding	quinoid dihydropteridine reductase [Source:HGNC Symbol;Acc:HGNC:9752]
ENSG00000151612.15	ZNF827	protein_coding	zinc finger protein 827 [Source:HGNC Symbol;Acc:HGNC:27193]
ENSG00000151746.13	BICD1	protein_coding	BICD cargo adaptor 1 [Source:HGNC Symbol;Acc:HGNC:1049]
ENSG00000151779.12	NBAS	protein_coding	neuroblastoma amplified sequence [Source:HGNC Symbol;Acc:HGNC:15625]
ENSG00000151893.14	CACUL1	protein_coding	CDK2 associated cullin domain 1 [Source:HGNC Symbol;Acc:HGNC:23727]
ENSG00000151923.17	TIAL1	protein_coding	TIA1 cytotoxic granule associated RNA binding protein like 1 [Source:HGNC Symbol;Acc:HGNC:11804]
ENSG00000152219.4	ARL14EP	protein_coding	ADP ribosylation factor like GTPase 14 effector protein [Source:HGNC Symbol;Acc:HGNC:26798]
ENSG00000152234.15	ATP5A1	protein_coding	ATP synthase, H+ transporting, mitochondrial F1 complex, alpha subunit 1, cardiac muscle [Source:HGNC Symbol;Acc:HGNC:823]
ENSG00000152270.8	PDE3B	protein_coding	phosphodiesterase 3B [Source:HGNC Symbol;Acc:HGNC:8779]
ENSG00000152359.14	POC5	protein_coding	POC5 centriolar protein [Source:HGNC Symbol;Acc:HGNC:26658]
ENSG00000152377.13	SPOCK1	protein_coding	SPARC/osteonectin, cwcv and kazal like domains proteoglycan 1 [Source:HGNC Symbol;Acc:HGNC:11251]
ENSG00000152380.9	FAM151B	protein_coding	family with sequence similarity 151 member B [Source:HGNC Symbol;Acc:HGNC:33716]
ENSG00000152404.15	CWF19L2	protein_coding	CWF19 like 2, cell cycle control (S. pombe) [Source:HGNC Symbol;Acc:HGNC:26508]
ENSG00000152527.13	PLEKHH2	protein_coding	pleckstrin homology, MyTH4 and FERM domain containing H2 [Source:HGNC Symbol;Acc:HGNC:30506]
ENSG00000152620.12	NADK2	protein_coding	NAD kinase 2, mitochondrial [Source:HGNC Symbol;Acc:HGNC:26404]
ENSG00000152683.14	SLC30A6	protein_coding	solute carrier family 30 member 6 [Source:HGNC Symbol;Acc:HGNC:19305]
ENSG00000152894.14	PTPRK	protein_coding	protein tyrosine phosphatase, receptor type K [Source:HGNC Symbol;Acc:HGNC:9674]
ENSG00000152904.11	GGPS1	protein_coding	geranylgeranyl diphosphate synthase 1 [Source:HGNC Symbol;Acc:HGNC:4249]
ENSG00000152944.8	MED21	protein_coding	mediator complex subunit 21 [Source:HGNC Symbol;Acc:HGNC:11473]
ENSG00000153046.17	CDYL	protein_coding	chromodomain Y like [Source:HGNC Symbol;Acc:HGNC:1811]
ENSG00000153406.13	NMRAL1	protein_coding	NmrA like redox sensor 1 [Source:HGNC Symbol;Acc:HGNC:24987]
ENSG00000153558.13	FBXL2	protein_coding	F-box and leucine rich repeat protein 2 [Source:HGNC Symbol;Acc:HGNC:13598]
ENSG00000153885.14	KCTD15	protein_coding	potassium channel tetramerization domain containing 15 [Source:HGNC Symbol;Acc:HGNC:23297]
ENSG00000153898.12	MCOLN2	protein_coding	mucolipin 2 [Source:HGNC Symbol;Acc:HGNC:13357]
ENSG00000153914.15	SREK1	protein_coding	splicing regulatory glutamic acid and lysine rich protein 1 [Source:HGNC Symbol;Acc:HGNC:17882]
ENSG00000153936.16	HS2ST1	protein_coding	heparan sulfate 2-O-sulfotransferase 1 [Source:HGNC Symbol;Acc:HGNC:5193]
ENSG00000153944.10	MSI2	protein_coding	musashi RNA binding protein 2 [Source:HGNC Symbol;Acc:HGNC:18585]
ENSG00000154001.13	PPP2R5E	protein_coding	protein phosphatase 2 regulatory subunit B'epsilon [Source:HGNC Symbol;Acc:HGNC:9313]
ENSG00000154102.10	C16orf74	protein_coding	chromosome 16 open reading frame 74 [Source:HGNC Symbol;Acc:HGNC:23362]
ENSG00000154265.15	ABCA5	protein_coding	ATP binding cassette subfamily A member 5 [Source:HGNC Symbol;Acc:HGNC:35]
ENSG00000154359.12	LONRF1	protein_coding	LON peptidase N-terminal domain and ring finger 1 [Source:HGNC Symbol;Acc:HGNC:26302]
ENSG00000154640.14	BTG3	protein_coding	BTG anti-proliferation factor 3 [Source:HGNC Symbol;Acc:HGNC:1132]
ENSG00000154813.9	DPH3	protein_coding	diphthamide biosynthesis 3 [Source:HGNC Symbol;Acc:HGNC:27717]
ENSG00000154832.14	CXXC1	protein_coding	CXXC finger protein 1 [Source:HGNC Symbol;Acc:HGNC:24343]
ENSG00000154889.16	MPPE1	protein_coding	metallophosphoesterase 1 [Source:HGNC Symbol;Acc:HGNC:15988]
ENSG00000155329.11	ZCCHC10	protein_coding	zinc finger CCHC-type containing 10 [Source:HGNC Symbol;Acc:HGNC:25954]
ENSG00000155380.11	SLC16A1	protein_coding	solute carrier family 16 member 1 [Source:HGNC Symbol;Acc:HGNC:10922]
ENSG00000155542.11	SETD9	protein_coding	SET domain containing 9 [Source:HGNC Symbol;Acc:HGNC:28508]
ENSG00000155621.14	C9orf85	protein_coding	chromosome 9 open reading frame 85 [Source:HGNC Symbol;Acc:HGNC:28784]
ENSG00000155846.16	PPARGC1B	protein_coding	PPARG coactivator 1 beta [Source:HGNC Symbol;Acc:HGNC:30022]
ENSG00000156261.12	CCT8	protein_coding	chaperonin containing TCP1 subunit 8 [Source:HGNC Symbol;Acc:HGNC:1623]
ENSG00000156345.17	CDK20	protein_coding	cyclin dependent kinase 20 [Source:HGNC Symbol;Acc:HGNC:21420]
ENSG00000156471.12	PTDSS1	protein_coding	phosphatidylserine synthase 1 [Source:HGNC Symbol;Acc:HGNC:9587]
ENSG00000156931.15	VPS8	protein_coding	VPS8, CORVET complex subunit [Source:HGNC Symbol;Acc:HGNC:29122]
ENSG00000157020.17	SEC13	protein_coding	SEC13 homolog, nuclear pore and COPII coat complex component [Source:HGNC Symbol;Acc:HGNC:10697]
ENSG00000157193.15	LRP8	protein_coding	LDL receptor related protein 8 [Source:HGNC Symbol;Acc:HGNC:6700]
ENSG00000157326.18	DHRS4	protein_coding	dehydrogenase/reductase 4 [Source:HGNC Symbol;Acc:HGNC:16985]
ENSG00000157353.16	FUK	protein_coding	fucokinase [Source:HGNC Symbol;Acc:HGNC:29500]
ENSG00000157426.13	AASDH	protein_coding	aminoadipate-semialdehyde dehydrogenase [Source:HGNC Symbol;Acc:HGNC:23993]
ENSG00000157538.13	DSCR3	protein_coding	DSCR3 arrestin fold containing [Source:HGNC Symbol;Acc:HGNC:3044]
ENSG00000157778.8	PSMG3	protein_coding	proteasome assembly chaperone 3 [Source:HGNC Symbol;Acc:HGNC:22420]
ENSG00000157870.14	FAM213B	protein_coding	family with sequence similarity 213 member B [Source:HGNC Symbol;Acc:HGNC:28390]
ENSG00000157895.11	C12orf43	protein_coding	chromosome 12 open reading frame 43 [Source:HGNC Symbol;Acc:HGNC:25719]
ENSG00000157954.14	WIPI2	protein_coding	WD repeat domain, phosphoinositide interacting 2 [Source:HGNC Symbol;Acc:HGNC:32225]
ENSG00000158006.13	PAFAH2	protein_coding	platelet activating factor acetylhydrolase 2 [Source:HGNC Symbol;Acc:HGNC:8579]
ENSG00000158079.14	PTPDC1	protein_coding	protein tyrosine phosphatase domain containing 1 [Source:HGNC Symbol;Acc:HGNC:30184]
ENSG00000158092.6	NCK1	protein_coding	NCK adaptor protein 1 [Source:HGNC Symbol;Acc:HGNC:7664]
ENSG00000158186.12	MRAS	protein_coding	muscle RAS oncogene homolog [Source:HGNC Symbol;Acc:HGNC:7227]
ENSG00000158286.12	RNF207	protein_coding	ring finger protein 207 [Source:HGNC Symbol;Acc:HGNC:32947]
ENSG00000158402.18	CDC25C	protein_coding	cell division cycle 25C [Source:HGNC Symbol;Acc:HGNC:1727]
ENSG00000158467.16	AHCYL2	protein_coding	adenosylhomocysteinase like 2 [Source:HGNC Symbol;Acc:HGNC:22204]
ENSG00000158552.12	ZFAND2B	protein_coding	zinc finger AN1-type containing 2B [Source:HGNC Symbol;Acc:HGNC:25206]
ENSG00000158985.13	CDC42SE2	protein_coding	CDC42 small effector 2 [Source:HGNC Symbol;Acc:HGNC:18547]
ENSG00000159086.14	PAXBP1	protein_coding	PAX3 and PAX7 binding protein 1 [Source:HGNC Symbol;Acc:HGNC:13579]
ENSG00000159131.16	GART	protein_coding	phosphoribosylglycinamide formyltransferase, phosphoribosylglycinamide synthetase, phosphoribosylaminoimidazole synthetase [Source:HGNC Symbol;Acc:HGNC:4163]
ENSG00000159140.19	SON	protein_coding	SON DNA binding protein [Source:HGNC Symbol;Acc:HGNC:11183]
ENSG00000159199.13	ATP5G1	protein_coding	ATP synthase, H+ transporting, mitochondrial Fo complex subunit C1 (subunit 9) [Source:HGNC Symbol;Acc:HGNC:841]
ENSG00000159208.15	CIART	protein_coding	circadian associated repressor of transcription [Source:HGNC Symbol;Acc:HGNC:25200]
ENSG00000159210.9	SNF8	protein_coding	SNF8, ESCRT-II complex subunit [Source:HGNC Symbol;Acc:HGNC:17028]
ENSG00000159348.12	CYB5R1	protein_coding	cytochrome b5 reductase 1 [Source:HGNC Symbol;Acc:HGNC:13397]
ENSG00000159685.10	CHCHD6	protein_coding	coiled-coil-helix-coiled-coil-helix domain containing 6 [Source:HGNC Symbol;Acc:HGNC:28184]
ENSG00000160058.18	BSDC1	protein_coding	BSD domain containing 1 [Source:HGNC Symbol;Acc:HGNC:25501]
ENSG00000160201.11	U2AF1	protein_coding	U2 small nuclear RNA auxiliary factor 1 [Source:HGNC Symbol;Acc:HGNC:12453]
ENSG00000160285.14	LSS	protein_coding	lanosterol synthase [Source:HGNC Symbol;Acc:HGNC:6708]
ENSG00000160305.17	DIP2A	protein_coding	disco interacting protein 2 homolog A [Source:HGNC Symbol;Acc:HGNC:17217]
ENSG00000160310.17	PRMT2	protein_coding	protein arginine methyltransferase 2 [Source:HGNC Symbol;Acc:HGNC:5186]
ENSG00000160446.18	ZDHHC12	protein_coding	zinc finger DHHC-type containing 12 [Source:HGNC Symbol;Acc:HGNC:19159]
ENSG00000160633.12	SAFB	protein_coding	scaffold attachment factor B [Source:HGNC Symbol;Acc:HGNC:10520]
ENSG00000160767.20	FAM189B	protein_coding	family with sequence similarity 189 member B [Source:HGNC Symbol;Acc:HGNC:1233]
ENSG00000160781.15	PAQR6	protein_coding	progestin and adipoQ receptor family member 6 [Source:HGNC Symbol;Acc:HGNC:30132]
ENSG00000160796.16	NBEAL2	protein_coding	neurobeachin like 2 [Source:HGNC Symbol;Acc:HGNC:31928]
ENSG00000160818.16	GPATCH4	protein_coding	G-patch domain containing 4 [Source:HGNC Symbol;Acc:HGNC:25982]
ENSG00000160972.9	PPP1R16A	protein_coding	protein phosphatase 1 regulatory subunit 16A [Source:HGNC Symbol;Acc:HGNC:14941]
ENSG00000161021.12	MAML1	protein_coding	mastermind like transcriptional coactivator 1 [Source:HGNC Symbol;Acc:HGNC:13632]
ENSG00000161217.11	PCYT1A	protein_coding	phosphate cytidylyltransferase 1, choline, alpha [Source:HGNC Symbol;Acc:HGNC:8754]
ENSG00000161249.20	DMKN	protein_coding	dermokine [Source:HGNC Symbol;Acc:HGNC:25063]
ENSG00000161265.14	U2AF1L4	protein_coding	U2 small nuclear RNA auxiliary factor 1 like 4 [Source:HGNC Symbol;Acc:HGNC:23020]
ENSG00000161513.11	FDXR	protein_coding	ferredoxin reductase [Source:HGNC Symbol;Acc:HGNC:3642]
ENSG00000161547.16	SRSF2	protein_coding	serine and arginine rich splicing factor 2 [Source:HGNC Symbol;Acc:HGNC:10783]
ENSG00000161558.10	TMEM143	protein_coding	transmembrane protein 143 [Source:HGNC Symbol;Acc:HGNC:25603]
ENSG00000161999.11	JMJD8	protein_coding	jumonji domain containing 8 [Source:HGNC Symbol;Acc:HGNC:14148]
ENSG00000162004.16	CCDC78	protein_coding	coiled-coil domain containing 78 [Source:HGNC Symbol;Acc:HGNC:14153]
ENSG00000162032.15	SPSB3	protein_coding	splA/ryanodine receptor domain and SOCS box containing 3 [Source:HGNC Symbol;Acc:HGNC:30629]
ENSG00000162129.12	CLPB	protein_coding	ClpB homolog, mitochondrial AAA ATPase chaperonin [Source:HGNC Symbol;Acc:HGNC:30664]
ENSG00000162174.12	ASRGL1	protein_coding	asparaginase like 1 [Source:HGNC Symbol;Acc:HGNC:16448]
ENSG00000162384.13	C1orf123	protein_coding	chromosome 1 open reading frame 123 [Source:HGNC Symbol;Acc:HGNC:26059]
ENSG00000162419.12	GMEB1	protein_coding	glucocorticoid modulatory element binding protein 1 [Source:HGNC Symbol;Acc:HGNC:4370]
ENSG00000162585.16	FAAP20	protein_coding	Fanconi anemia core complex associated protein 20 [Source:HGNC Symbol;Acc:HGNC:26428]
ENSG00000162599.15	NFIA	protein_coding	nuclear factor I A [Source:HGNC Symbol;Acc:HGNC:7784]
ENSG00000162601.9	MYSM1	protein_coding	Myb like, SWIRM and MPN domains 1 [Source:HGNC Symbol;Acc:HGNC:29401]
ENSG00000162642.13	C1orf52	protein_coding	chromosome 1 open reading frame 52 [Source:HGNC Symbol;Acc:HGNC:24871]
ENSG00000162664.16	ZNF326	protein_coding	zinc finger protein 326 [Source:HGNC Symbol;Acc:HGNC:14104]
ENSG00000162735.18	PEX19	protein_coding	peroxisomal biogenesis factor 19 [Source:HGNC Symbol;Acc:HGNC:9713]
ENSG00000162836.11	ACP6	protein_coding	acid phosphatase 6, lysophosphatidic [Source:HGNC Symbol;Acc:HGNC:29609]
ENSG00000162929.13	KIAA1841	protein_coding	KIAA1841 [Source:HGNC Symbol;Acc:HGNC:29387]
ENSG00000162971.10	TYW5	protein_coding	tRNA-yW synthesizing protein 5 [Source:HGNC Symbol;Acc:HGNC:26754]
ENSG00000163001.11	CFAP36	protein_coding	cilia and flagella associated protein 36 [Source:HGNC Symbol;Acc:HGNC:30540]
ENSG00000163029.15	SMC6	protein_coding	structural maintenance of chromosomes 6 [Source:HGNC Symbol;Acc:HGNC:20466]
ENSG00000163071.10	SPATA18	protein_coding	spermatogenesis associated 18 [Source:HGNC Symbol;Acc:HGNC:29579]
ENSG00000163156.11	SCNM1	protein_coding	sodium channel modifier 1 [Source:HGNC Symbol;Acc:HGNC:23136]
ENSG00000163235.15	TGFA	protein_coding	transforming growth factor alpha [Source:HGNC Symbol;Acc:HGNC:11765]
ENSG00000163257.10	DCAF16	protein_coding	DDB1 and CUL4 associated factor 16 [Source:HGNC Symbol;Acc:HGNC:25987]
ENSG00000163281.11	GNPDA2	protein_coding	glucosamine-6-phosphate deaminase 2 [Source:HGNC Symbol;Acc:HGNC:21526]
ENSG00000163312.10	HELQ	protein_coding	helicase, POLQ like [Source:HGNC Symbol;Acc:HGNC:18536]
ENSG00000163362.10	INAVA	protein_coding	innate immunity activator [Source:HGNC Symbol;Acc:HGNC:25599]
ENSG00000163412.12	EIF4E3	protein_coding	eukaryotic translation initiation factor 4E family member 3 [Source:HGNC Symbol;Acc:HGNC:31837]
ENSG00000163449.10	TMEM169	protein_coding	transmembrane protein 169 [Source:HGNC Symbol;Acc:HGNC:25130]
ENSG00000163517.14	HDAC11	protein_coding	histone deacetylase 11 [Source:HGNC Symbol;Acc:HGNC:19086]
ENSG00000163558.12	PRKCI	protein_coding	protein kinase C iota [Source:HGNC Symbol;Acc:HGNC:9404]
ENSG00000163625.15	WDFY3	protein_coding	WD repeat and FYVE domain containing 3 [Source:HGNC Symbol;Acc:HGNC:20751]
ENSG00000163633.10	C4orf36	protein_coding	chromosome 4 open reading frame 36 [Source:HGNC Symbol;Acc:HGNC:28386]
ENSG00000163659.12	TIPARP	protein_coding	TCDD inducible poly(ADP-ribose) polymerase [Source:HGNC Symbol;Acc:HGNC:23696]
ENSG00000163719.19	MTMR14	protein_coding	myotubularin related protein 14 [Source:HGNC Symbol;Acc:HGNC:26190]
ENSG00000163738.18	MTHFD2L	protein_coding	methylenetetrahydrofolate dehydrogenase (NADP+ dependent) 2 like [Source:HGNC Symbol;Acc:HGNC:31865]
ENSG00000163743.13	RCHY1	protein_coding	ring finger and CHY zinc finger domain containing 1 [Source:HGNC Symbol;Acc:HGNC:17479]
ENSG00000163848.19	ZNF148	protein_coding	zinc finger protein 148 [Source:HGNC Symbol;Acc:HGNC:12933]
ENSG00000163900.10	TMEM41A	protein_coding	transmembrane protein 41A [Source:HGNC Symbol;Acc:HGNC:30544]
ENSG00000163913.11	IFT122	protein_coding	intraflagellar transport 122 [Source:HGNC Symbol;Acc:HGNC:13556]
ENSG00000163923.9	RPL39L	protein_coding	ribosomal protein L39 like [Source:HGNC Symbol;Acc:HGNC:17094]
ENSG00000163945.16	UVSSA	protein_coding	UV stimulated scaffold protein A [Source:HGNC Symbol;Acc:HGNC:29304]
ENSG00000164081.12	TEX264	protein_coding	testis expressed 264 [Source:HGNC Symbol;Acc:HGNC:30247]
ENSG00000164087.7	POC1A	protein_coding	POC1 centriolar protein A [Source:HGNC Symbol;Acc:HGNC:24488]
ENSG00000164088.17	PPM1M	protein_coding	protein phosphatase, Mg2+/Mn2+ dependent 1M [Source:HGNC Symbol;Acc:HGNC:26506]
ENSG00000164109.13	MAD2L1	protein_coding	mitotic arrest deficient 2 like 1 [Source:HGNC Symbol;Acc:HGNC:6763]
ENSG00000164209.16	SLC25A46	protein_coding	solute carrier family 25 member 46 [Source:HGNC Symbol;Acc:HGNC:25198]
ENSG00000164211.12	STARD4	protein_coding	StAR related lipid transfer domain containing 4 [Source:HGNC Symbol;Acc:HGNC:18058]
ENSG00000164291.16	ARSK	protein_coding	arylsulfatase family member K [Source:HGNC Symbol;Acc:HGNC:25239]
ENSG00000164306.10	PRIMPOL	protein_coding	primase and DNA directed polymerase [Source:HGNC Symbol;Acc:HGNC:26575]
ENSG00000164338.9	UTP15	protein_coding	UTP15, small subunit processome component [Source:HGNC Symbol;Acc:HGNC:25758]
ENSG00000164406.7	LEAP2	protein_coding	liver enriched antimicrobial peptide 2 [Source:HGNC Symbol;Acc:HGNC:29571]
ENSG00000164638.10	SLC29A4	protein_coding	solute carrier family 29 member 4 [Source:HGNC Symbol;Acc:HGNC:23097]
ENSG00000164733.20	CTSB	protein_coding	cathepsin B [Source:HGNC Symbol;Acc:HGNC:2527]
ENSG00000164808.16	SPIDR	protein_coding	scaffolding protein involved in DNA repair [Source:HGNC Symbol;Acc:HGNC:28971]
ENSG00000164815.10	ORC5	protein_coding	origin recognition complex subunit 5 [Source:HGNC Symbol;Acc:HGNC:8491]
ENSG00000164877.18	MICALL2	protein_coding	MICAL like 2 [Source:HGNC Symbol;Acc:HGNC:29672]
ENSG00000164941.13	INTS8	protein_coding	integrator complex subunit 8 [Source:HGNC Symbol;Acc:HGNC:26048]
ENSG00000164970.14	FAM219A	protein_coding	family with sequence similarity 219 member A [Source:HGNC Symbol;Acc:HGNC:19920]
ENSG00000165102.14	HGSNAT	protein_coding	heparan-alpha-glucosaminide N-acetyltransferase [Source:HGNC Symbol;Acc:HGNC:26527]
ENSG00000165233.17	CARD19	protein_coding	caspase recruitment domain family member 19 [Source:HGNC Symbol;Acc:HGNC:28148]
ENSG00000165275.9	TRMT10B	protein_coding	tRNA methyltransferase 10B [Source:HGNC Symbol;Acc:HGNC:26454]
ENSG00000165359.15	INTS6L	protein_coding	integrator complex subunit 6 like [Source:HGNC Symbol;Acc:HGNC:27334]
ENSG00000165406.15	2008-03-01	protein_coding	membrane associated ring-CH-type finger 8 [Source:HGNC Symbol;Acc:HGNC:23356]
ENSG00000165494.11	PCF11	protein_coding	PCF11 cleavage and polyadenylation factor subunit [Source:HGNC Symbol;Acc:HGNC:30097]
ENSG00000165516.10	KLHDC2	protein_coding	kelch domain containing 2 [Source:HGNC Symbol;Acc:HGNC:20231]
ENSG00000165792.17	METTL17	protein_coding	methyltransferase like 17 [Source:HGNC Symbol;Acc:HGNC:19280]
ENSG00000165795.23	NDRG2	protein_coding	NDRG family member 2 [Source:HGNC Symbol;Acc:HGNC:14460]
ENSG00000165813.18	CCDC186	protein_coding	coiled-coil domain containing 186 [Source:HGNC Symbol;Acc:HGNC:24349]
ENSG00000165821.11	SALL2	protein_coding	spalt like transcription factor 2 [Source:HGNC Symbol;Acc:HGNC:10526]
ENSG00000166002.6	SMCO4	protein_coding	single-pass membrane protein with coiled-coil domains 4 [Source:HGNC Symbol;Acc:HGNC:24810]
ENSG00000166136.15	NDUFB8	protein_coding	NADH:ubiquinone oxidoreductase subunit B8 [Source:HGNC Symbol;Acc:HGNC:7703]
ENSG00000166167.17	BTRC	protein_coding	beta-transducin repeat containing E3 ubiquitin protein ligase [Source:HGNC Symbol;Acc:HGNC:1144]
ENSG00000166200.14	COPS2	protein_coding	COP9 signalosome subunit 2 [Source:HGNC Symbol;Acc:HGNC:30747]
ENSG00000166228.8	PCBD1	protein_coding	pterin-4 alpha-carbinolamine dehydratase 1 [Source:HGNC Symbol;Acc:HGNC:8646]
ENSG00000166289.5	PLEKHF1	protein_coding	pleckstrin homology and FYVE domain containing 1 [Source:HGNC Symbol;Acc:HGNC:20764]
ENSG00000166509.10	CLEC3A	protein_coding	C-type lectin domain family 3 member A [Source:HGNC Symbol;Acc:HGNC:2052]
ENSG00000166575.16	TMEM135	protein_coding	transmembrane protein 135 [Source:HGNC Symbol;Acc:HGNC:26167]
ENSG00000166669.13	ATF7IP2	protein_coding	activating transcription factor 7 interacting protein 2 [Source:HGNC Symbol;Acc:HGNC:20397]
ENSG00000166681.13	BEX3	protein_coding	brain expressed X-linked 3 [Source:HGNC Symbol;Acc:HGNC:13388]
ENSG00000166881.9	NEMP1	protein_coding	nuclear envelope integral membrane protein 1 [Source:HGNC Symbol;Acc:HGNC:29001]
ENSG00000166889.13	PATL1	protein_coding	PAT1 homolog 1, processing body mRNA decay factor [Source:HGNC Symbol;Acc:HGNC:26721]
ENSG00000166925.8	TSC22D4	protein_coding	TSC22 domain family member 4 [Source:HGNC Symbol;Acc:HGNC:21696]
ENSG00000166965.12	RCCD1	protein_coding	RCC1 domain containing 1 [Source:HGNC Symbol;Acc:HGNC:30457]
ENSG00000166987.14	MBD6	protein_coding	methyl-CpG binding domain protein 6 [Source:HGNC Symbol;Acc:HGNC:20445]
ENSG00000167114.12	SLC27A4	protein_coding	solute carrier family 27 member 4 [Source:HGNC Symbol;Acc:HGNC:10998]
ENSG00000167232.13	ZNF91	protein_coding	zinc finger protein 91 [Source:HGNC Symbol;Acc:HGNC:13166]
ENSG00000167306.19	MYO5B	protein_coding	myosin VB [Source:HGNC Symbol;Acc:HGNC:7603]
ENSG00000167325.14	RRM1	protein_coding	ribonucleotide reductase catalytic subunit M1 [Source:HGNC Symbol;Acc:HGNC:10451]
ENSG00000167397.14	VKORC1	protein_coding	vitamin K epoxide reductase complex subunit 1 [Source:HGNC Symbol;Acc:HGNC:23663]
ENSG00000167468.16	GPX4	protein_coding	glutathione peroxidase 4 [Source:HGNC Symbol;Acc:HGNC:4556]
ENSG00000167525.13	PROCA1	protein_coding	protein interacting with cyclin A1 [Source:HGNC Symbol;Acc:HGNC:28600]
ENSG00000167608.11	TMC4	protein_coding	transmembrane channel like 4 [Source:HGNC Symbol;Acc:HGNC:22998]
ENSG00000167637.16	ZNF283	protein_coding	zinc finger protein 283 [Source:HGNC Symbol;Acc:HGNC:13077]
ENSG00000167645.16	YIF1B	protein_coding	Yip1 interacting factor homolog B, membrane trafficking protein [Source:HGNC Symbol;Acc:HGNC:30511]
ENSG00000167671.11	UBXN6	protein_coding	UBX domain protein 6 [Source:HGNC Symbol;Acc:HGNC:14928]
ENSG00000167705.11	RILP	protein_coding	Rab interacting lysosomal protein [Source:HGNC Symbol;Acc:HGNC:30266]
ENSG00000167711.13	SERPINF2	protein_coding	serpin family F member 2 [Source:HGNC Symbol;Acc:HGNC:9075]
ENSG00000167723.14	TRPV3	protein_coding	transient receptor potential cation channel subfamily V member 3 [Source:HGNC Symbol;Acc:HGNC:18084]
ENSG00000167775.10	CD320	protein_coding	CD320 molecule [Source:HGNC Symbol;Acc:HGNC:16692]
ENSG00000167987.10	VPS37C	protein_coding	VPS37C, ESCRT-I subunit [Source:HGNC Symbol;Acc:HGNC:26097]
ENSG00000168014.16	C2CD3	protein_coding	C2 calcium dependent domain containing 3 [Source:HGNC Symbol;Acc:HGNC:24564]
ENSG00000168090.9	COPS6	protein_coding	COP9 signalosome subunit 6 [Source:HGNC Symbol;Acc:HGNC:21749]
ENSG00000168116.13	KIAA1586	protein_coding	KIAA1586 [Source:HGNC Symbol;Acc:HGNC:21360]
ENSG00000168297.15	PXK	protein_coding	PX domain containing serine/threonine kinase like [Source:HGNC Symbol;Acc:HGNC:23326]
ENSG00000168300.13	PCMTD1	protein_coding	protein-L-isoaspartate (D-aspartate) O-methyltransferase domain containing 1 [Source:HGNC Symbol;Acc:HGNC:30483]
ENSG00000168438.14	CDC40	protein_coding	cell division cycle 40 [Source:HGNC Symbol;Acc:HGNC:17350]
ENSG00000168517.10	HEXIM2	protein_coding	hexamethylene bisacetamide inducible 2 [Source:HGNC Symbol;Acc:HGNC:28591]
ENSG00000168569.7	TMEM223	protein_coding	transmembrane protein 223 [Source:HGNC Symbol;Acc:HGNC:28464]
ENSG00000168591.15	TMUB2	protein_coding	transmembrane and ubiquitin like domain containing 2 [Source:HGNC Symbol;Acc:HGNC:28459]
ENSG00000168621.14	GDNF	protein_coding	glial cell derived neurotrophic factor [Source:HGNC Symbol;Acc:HGNC:4232]
ENSG00000168675.18	LDLRAD4	protein_coding	low density lipoprotein receptor class A domain containing 4 [Source:HGNC Symbol;Acc:HGNC:1224]
ENSG00000168710.17	AHCYL1	protein_coding	adenosylhomocysteinase like 1 [Source:HGNC Symbol;Acc:HGNC:344]
ENSG00000168765.16	GSTM4	protein_coding	glutathione S-transferase mu 4 [Source:HGNC Symbol;Acc:HGNC:4636]
ENSG00000168785.7	TSPAN5	protein_coding	tetraspanin 5 [Source:HGNC Symbol;Acc:HGNC:17753]
ENSG00000168806.7	LCMT2	protein_coding	leucine carboxyl methyltransferase 2 [Source:HGNC Symbol;Acc:HGNC:17558]
ENSG00000168813.16	ZNF507	protein_coding	zinc finger protein 507 [Source:HGNC Symbol;Acc:HGNC:23783]
ENSG00000168872.16	DDX19A	protein_coding	DEAD-box helicase 19A [Source:HGNC Symbol;Acc:HGNC:25628]
ENSG00000168944.15	CEP120	protein_coding	centrosomal protein 120 [Source:HGNC Symbol;Acc:HGNC:26690]
ENSG00000169016.16	E2F6	protein_coding	E2F transcription factor 6 [Source:HGNC Symbol;Acc:HGNC:3120]
ENSG00000169062.14	UPF3A	protein_coding	UPF3A, regulator of nonsense mediated mRNA decay [Source:HGNC Symbol;Acc:HGNC:20332]
ENSG00000169083.16	AR	protein_coding	androgen receptor [Source:HGNC Symbol;Acc:HGNC:644]
ENSG00000169118.17	CSNK1G1	protein_coding	casein kinase 1 gamma 1 [Source:HGNC Symbol;Acc:HGNC:2454]
ENSG00000169155.9	ZBTB43	protein_coding	zinc finger and BTB domain containing 43 [Source:HGNC Symbol;Acc:HGNC:17908]
ENSG00000169228.13	RAB24	protein_coding	RAB24, member RAS oncogene family [Source:HGNC Symbol;Acc:HGNC:9765]
ENSG00000169299.13	PGM2	protein_coding	phosphoglucomutase 2 [Source:HGNC Symbol;Acc:HGNC:8906]
ENSG00000169372.12	CRADD	protein_coding	CASP2 and RIPK1 domain containing adaptor with death domain [Source:HGNC Symbol;Acc:HGNC:2340]
ENSG00000169598.15	DFFB	protein_coding	DNA fragmentation factor subunit beta [Source:HGNC Symbol;Acc:HGNC:2773]
ENSG00000169660.15	HEXDC	protein_coding	hexosaminidase D [Source:HGNC Symbol;Acc:HGNC:26307]
ENSG00000169696.15	ASPSCR1	protein_coding	ASPSCR1, UBX domain containing tether for SLC2A4 [Source:HGNC Symbol;Acc:HGNC:13825]
ENSG00000169718.17	DUS1L	protein_coding	dihydrouridine synthase 1 like [Source:HGNC Symbol;Acc:HGNC:30086]
ENSG00000169756.16	LIMS1	protein_coding	LIM zinc finger domain containing 1 [Source:HGNC Symbol;Acc:HGNC:6616]
ENSG00000169814.12	BTD	protein_coding	biotinidase [Source:HGNC Symbol;Acc:HGNC:1122]
ENSG00000169895.5	SYAP1	protein_coding	synapse associated protein 1 [Source:HGNC Symbol;Acc:HGNC:16273]
ENSG00000169926.10	KLF13	protein_coding	Kruppel like factor 13 [Source:HGNC Symbol;Acc:HGNC:13672]
ENSG00000170017.12	ALCAM	protein_coding	activated leukocyte cell adhesion molecule [Source:HGNC Symbol;Acc:HGNC:400]
ENSG00000170037.13	CNTROB	protein_coding	centrobin, centriole duplication and spindle assembly protein [Source:HGNC Symbol;Acc:HGNC:29616]
ENSG00000170142.11	UBE2E1	protein_coding	ubiquitin conjugating enzyme E2 E1 [Source:HGNC Symbol;Acc:HGNC:12477]
ENSG00000170175.10	CHRNB1	protein_coding	cholinergic receptor nicotinic beta 1 subunit [Source:HGNC Symbol;Acc:HGNC:1961]
ENSG00000170234.12	PWWP2A	protein_coding	PWWP domain containing 2A [Source:HGNC Symbol;Acc:HGNC:29406]
ENSG00000170293.8	CMTM8	protein_coding	CKLF like MARVEL transmembrane domain containing 8 [Source:HGNC Symbol;Acc:HGNC:19179]
ENSG00000170340.10	B3GNT2	protein_coding	UDP-GlcNAc:betaGal beta-1,3-N-acetylglucosaminyltransferase 2 [Source:HGNC Symbol;Acc:HGNC:15629]
ENSG00000170364.12	SETMAR	protein_coding	SET domain and mariner transposase fusion gene [Source:HGNC Symbol;Acc:HGNC:10762]
ENSG00000170412.16	GPRC5C	protein_coding	G protein-coupled receptor class C group 5 member C [Source:HGNC Symbol;Acc:HGNC:13309]
ENSG00000170417.15	TMEM182	protein_coding	transmembrane protein 182 [Source:HGNC Symbol;Acc:HGNC:26391]
ENSG00000170525.19	PFKFB3	protein_coding	6-phosphofructo-2-kinase/fructose-2,6-biphosphatase 3 [Source:HGNC Symbol;Acc:HGNC:8874]
ENSG00000170537.12	TMC7	protein_coding	transmembrane channel like 7 [Source:HGNC Symbol;Acc:HGNC:23000]
ENSG00000170653.18	ATF7	protein_coding	activating transcription factor 7 [Source:HGNC Symbol;Acc:HGNC:792]
ENSG00000170832.12	USP32	protein_coding	ubiquitin specific peptidase 32 [Source:HGNC Symbol;Acc:HGNC:19143]
ENSG00000170854.17	RIOX2	protein_coding	ribosomal oxygenase 2 [Source:HGNC Symbol;Acc:HGNC:19441]
ENSG00000170873.18	MTSS1	protein_coding	MTSS1, I-BAR domain containing [Source:HGNC Symbol;Acc:HGNC:20443]
ENSG00000170889.13	RPS9	protein_coding	ribosomal protein S9 [Source:HGNC Symbol;Acc:HGNC:10442]
ENSG00000171033.12	PKIA	protein_coding	cAMP-dependent protein kinase inhibitor alpha [Source:HGNC Symbol;Acc:HGNC:9017]
ENSG00000171044.10	XKR6	protein_coding	XK related 6 [Source:HGNC Symbol;Acc:HGNC:27806]
ENSG00000171163.15	ZNF692	protein_coding	zinc finger protein 692 [Source:HGNC Symbol;Acc:HGNC:26049]
ENSG00000171174.13	RBKS	protein_coding	ribokinase [Source:HGNC Symbol;Acc:HGNC:30325]
ENSG00000171302.16	CANT1	protein_coding	calcium activated nucleotidase 1 [Source:HGNC Symbol;Acc:HGNC:19721]
ENSG00000171316.11	CHD7	protein_coding	chromodomain helicase DNA binding protein 7 [Source:HGNC Symbol;Acc:HGNC:20626]
ENSG00000171448.8	ZBTB26	protein_coding	zinc finger and BTB domain containing 26 [Source:HGNC Symbol;Acc:HGNC:23383]
ENSG00000171466.9	ZNF562	protein_coding	zinc finger protein 562 [Source:HGNC Symbol;Acc:HGNC:25950]
ENSG00000171475.13	WIPF2	protein_coding	WAS/WASL interacting protein family member 2 [Source:HGNC Symbol;Acc:HGNC:30923]
ENSG00000171574.17	ZNF584	protein_coding	zinc finger protein 584 [Source:HGNC Symbol;Acc:HGNC:27318]
ENSG00000171606.17	ZNF274	protein_coding	zinc finger protein 274 [Source:HGNC Symbol;Acc:HGNC:13068]
ENSG00000171634.16	BPTF	protein_coding	bromodomain PHD finger transcription factor [Source:HGNC Symbol;Acc:HGNC:3581]
ENSG00000171700.13	RGS19	protein_coding	regulator of G protein signaling 19 [Source:HGNC Symbol;Acc:HGNC:13735]
ENSG00000171729.13	TMEM51	protein_coding	transmembrane protein 51 [Source:HGNC Symbol;Acc:HGNC:25488]
ENSG00000171735.18	CAMTA1	protein_coding	calmodulin binding transcription activator 1 [Source:HGNC Symbol;Acc:HGNC:18806]
ENSG00000171791.12	BCL2	protein_coding	BCL2, apoptosis regulator [Source:HGNC Symbol;Acc:HGNC:990]
ENSG00000171843.15	MLLT3	protein_coding	MLLT3, super elongation complex subunit [Source:HGNC Symbol;Acc:HGNC:7136]
ENSG00000171861.10	MRM3	protein_coding	mitochondrial rRNA methyltransferase 3 [Source:HGNC Symbol;Acc:HGNC:18485]
ENSG00000171953.15	ATPAF2	protein_coding	ATP synthase mitochondrial F1 complex assembly factor 2 [Source:HGNC Symbol;Acc:HGNC:18802]
ENSG00000172046.18	USP19	protein_coding	ubiquitin specific peptidase 19 [Source:HGNC Symbol;Acc:HGNC:12617]
ENSG00000172057.9	ORMDL3	protein_coding	ORMDL sphingolipid biosynthesis regulator 3 [Source:HGNC Symbol;Acc:HGNC:16038]
ENSG00000172062.16	SMN1	protein_coding	survival of motor neuron 1, telomeric [Source:HGNC Symbol;Acc:HGNC:11117]
ENSG00000172171.10	TEFM	protein_coding	transcription elongation factor, mitochondrial [Source:HGNC Symbol;Acc:HGNC:26223]
ENSG00000172270.18	BSG	protein_coding	basigin (Ok blood group) [Source:HGNC Symbol;Acc:HGNC:1116]
ENSG00000172366.19	MCRIP2	protein_coding	MAPK regulated corepressor interacting protein 2 [Source:HGNC Symbol;Acc:HGNC:14142]
ENSG00000172409.5	CLP1	protein_coding	cleavage and polyadenylation factor I subunit 1 [Source:HGNC Symbol;Acc:HGNC:16999]
ENSG00000172590.18	MRPL52	protein_coding	mitochondrial ribosomal protein L52 [Source:HGNC Symbol;Acc:HGNC:16655]
ENSG00000172602.9	RND1	protein_coding	Rho family GTPase 1 [Source:HGNC Symbol;Acc:HGNC:18314]
ENSG00000172661.17	WASHC2C	protein_coding	WASH complex subunit 2C [Source:HGNC Symbol;Acc:HGNC:23414]
ENSG00000172663.8	TMEM134	protein_coding	transmembrane protein 134 [Source:HGNC Symbol;Acc:HGNC:26142]
ENSG00000172725.13	CORO1B	protein_coding	coronin 1B [Source:HGNC Symbol;Acc:HGNC:2253]
ENSG00000172728.15	FUT10	protein_coding	fucosyltransferase 10 [Source:HGNC Symbol;Acc:HGNC:19234]
ENSG00000172766.18	NAA16	protein_coding	N(alpha)-acetyltransferase 16, NatA auxiliary subunit [Source:HGNC Symbol;Acc:HGNC:26164]
ENSG00000172785.18	CBWD1	protein_coding	COBW domain containing 1 [Source:HGNC Symbol;Acc:HGNC:17134]
ENSG00000172888.11	ZNF621	protein_coding	zinc finger protein 621 [Source:HGNC Symbol;Acc:HGNC:24787]
ENSG00000172922.8	RNASEH2C	protein_coding	ribonuclease H2 subunit C [Source:HGNC Symbol;Acc:HGNC:24116]
ENSG00000172936.12	MYD88	protein_coding	myeloid differentiation primary response 88 [Source:HGNC Symbol;Acc:HGNC:7562]
ENSG00000172943.19	PHF8	protein_coding	PHD finger protein 8 [Source:HGNC Symbol;Acc:HGNC:20672]
ENSG00000172965.14	MIR4435-2HG	lincRNA	MIR4435-2 host gene [Source:HGNC Symbol;Acc:HGNC:35163]
ENSG00000173065.13	FAM222B	protein_coding	family with sequence similarity 222 member B [Source:HGNC Symbol;Acc:HGNC:25563]
ENSG00000173083.14	HPSE	protein_coding	heparanase [Source:HGNC Symbol;Acc:HGNC:5164]
ENSG00000173175.14	ADCY5	protein_coding	adenylate cyclase 5 [Source:HGNC Symbol;Acc:HGNC:236]
ENSG00000173262.11	SLC2A14	protein_coding	solute carrier family 2 member 14 [Source:HGNC Symbol;Acc:HGNC:18301]
ENSG00000173327.7	MAP3K11	protein_coding	mitogen-activated protein kinase kinase kinase 11 [Source:HGNC Symbol;Acc:HGNC:6850]
ENSG00000173334.3	TRIB1	protein_coding	tribbles pseudokinase 1 [Source:HGNC Symbol;Acc:HGNC:16891]
ENSG00000173465.7	SSSCA1	protein_coding	Sjogren syndrome/scleroderma autoantigen 1 [Source:HGNC Symbol;Acc:HGNC:11328]
ENSG00000173540.12	GMPPB	protein_coding	GDP-mannose pyrophosphorylase B [Source:HGNC Symbol;Acc:HGNC:22932]
ENSG00000173588.14	CEP83	protein_coding	centrosomal protein 83 [Source:HGNC Symbol;Acc:HGNC:17966]
ENSG00000173638.18	SLC19A1	protein_coding	solute carrier family 19 member 1 [Source:HGNC Symbol;Acc:HGNC:10937]
ENSG00000173894.10	CBX2	protein_coding	chromobox 2 [Source:HGNC Symbol;Acc:HGNC:1552]
ENSG00000174197.16	MGA	protein_coding	MGA, MAX dimerization protein [Source:HGNC Symbol;Acc:HGNC:14010]
ENSG00000174227.15	PIGG	protein_coding	phosphatidylinositol glycan anchor biosynthesis class G [Source:HGNC Symbol;Acc:HGNC:25985]
ENSG00000174628.16	IQCK	protein_coding	IQ motif containing K [Source:HGNC Symbol;Acc:HGNC:28556]
ENSG00000174720.15	LARP7	protein_coding	La ribonucleoprotein domain family member 7 [Source:HGNC Symbol;Acc:HGNC:24912]
ENSG00000174791.10	RIN1	protein_coding	Ras and Rab interactor 1 [Source:HGNC Symbol;Acc:HGNC:18749]
ENSG00000175166.16	PSMD2	protein_coding	proteasome 26S subunit, non-ATPase 2 [Source:HGNC Symbol;Acc:HGNC:9559]
ENSG00000175221.14	MED16	protein_coding	mediator complex subunit 16 [Source:HGNC Symbol;Acc:HGNC:17556]
ENSG00000175224.16	ATG13	protein_coding	autophagy related 13 [Source:HGNC Symbol;Acc:HGNC:29091]
ENSG00000175274.18	TP53I11	protein_coding	tumor protein p53 inducible protein 11 [Source:HGNC Symbol;Acc:HGNC:16842]
ENSG00000175376.8	EIF1AD	protein_coding	eukaryotic translation initiation factor 1A domain containing [Source:HGNC Symbol;Acc:HGNC:28147]
ENSG00000175390.13	EIF3F	protein_coding	eukaryotic translation initiation factor 3 subunit F [Source:HGNC Symbol;Acc:HGNC:3275]
ENSG00000175455.14	CCDC14	protein_coding	coiled-coil domain containing 14 [Source:HGNC Symbol;Acc:HGNC:25766]
ENSG00000175467.14	SART1	protein_coding	SART1, U4/U6.U5 tri-snRNP-associated protein 1 [Source:HGNC Symbol;Acc:HGNC:10538]
ENSG00000175470.18	PPP2R2D	protein_coding	protein phosphatase 2 regulatory subunit Bdelta [Source:HGNC Symbol;Acc:HGNC:23732]
ENSG00000175482.8	POLD4	protein_coding	DNA polymerase delta 4, accessory subunit [Source:HGNC Symbol;Acc:HGNC:14106]
ENSG00000175550.7	DRAP1	protein_coding	DR1 associated protein 1 [Source:HGNC Symbol;Acc:HGNC:3019]
ENSG00000175581.13	MRPL48	protein_coding	mitochondrial ribosomal protein L48 [Source:HGNC Symbol;Acc:HGNC:16653]
ENSG00000175591.11	P2RY2	protein_coding	purinergic receptor P2Y2 [Source:HGNC Symbol;Acc:HGNC:8541]
ENSG00000175662.17	TOM1L2	protein_coding	target of myb1 like 2 membrane trafficking protein [Source:HGNC Symbol;Acc:HGNC:11984]
ENSG00000175768.12	TOMM5	protein_coding	translocase of outer mitochondrial membrane 5 [Source:HGNC Symbol;Acc:HGNC:31369]
ENSG00000175866.15	BAIAP2	protein_coding	BAI1 associated protein 2 [Source:HGNC Symbol;Acc:HGNC:947]
ENSG00000176014.12	TUBB6	protein_coding	tubulin beta 6 class V [Source:HGNC Symbol;Acc:HGNC:20776]
ENSG00000176101.11	SSNA1	protein_coding	SS nuclear autoantigen 1 [Source:HGNC Symbol;Acc:HGNC:11321]
ENSG00000176371.13	ZSCAN2	protein_coding	zinc finger and SCAN domain containing 2 [Source:HGNC Symbol;Acc:HGNC:20994]
ENSG00000176834.13	VSIG10	protein_coding	V-set and immunoglobulin domain containing 10 [Source:HGNC Symbol;Acc:HGNC:26078]
ENSG00000176842.14	IRX5	protein_coding	iroquois homeobox 5 [Source:HGNC Symbol;Acc:HGNC:14361]
ENSG00000176974.19	SHMT1	protein_coding	serine hydroxymethyltransferase 1 [Source:HGNC Symbol;Acc:HGNC:10850]
ENSG00000177045.7	SIX5	protein_coding	SIX homeobox 5 [Source:HGNC Symbol;Acc:HGNC:10891]
ENSG00000177082.12	WDR73	protein_coding	WD repeat domain 73 [Source:HGNC Symbol;Acc:HGNC:25928]
ENSG00000177119.15	ANO6	protein_coding	anoctamin 6 [Source:HGNC Symbol;Acc:HGNC:25240]
ENSG00000177156.10	TALDO1	protein_coding	transaldolase 1 [Source:HGNC Symbol;Acc:HGNC:11559]
ENSG00000177302.14	TOP3A	protein_coding	topoisomerase (DNA) III alpha [Source:HGNC Symbol;Acc:HGNC:11992]
ENSG00000177463.15	NR2C2	protein_coding	nuclear receptor subfamily 2 group C member 2 [Source:HGNC Symbol;Acc:HGNC:7972]
ENSG00000177646.18	ACAD9	protein_coding	acyl-CoA dehydrogenase family member 9 [Source:HGNC Symbol;Acc:HGNC:21497]
ENSG00000177674.15	AGTRAP	protein_coding	angiotensin II receptor associated protein [Source:HGNC Symbol;Acc:HGNC:13539]
ENSG00000177707.10	NECTIN3	protein_coding	nectin cell adhesion molecule 3 [Source:HGNC Symbol;Acc:HGNC:17664]
ENSG00000178038.16	ALS2CL	protein_coding	ALS2 C-terminal like [Source:HGNC Symbol;Acc:HGNC:20605]
ENSG00000178053.17	MLF1	protein_coding	myeloid leukemia factor 1 [Source:HGNC Symbol;Acc:HGNC:7125]
ENSG00000178078.11	STAP2	protein_coding	signal transducing adaptor family member 2 [Source:HGNC Symbol;Acc:HGNC:30430]
ENSG00000178096.8	BOLA1	protein_coding	bolA family member 1 [Source:HGNC Symbol;Acc:HGNC:24263]
ENSG00000178177.15	LCORL	protein_coding	ligand dependent nuclear receptor corepressor like [Source:HGNC Symbol;Acc:HGNC:30776]
ENSG00000178202.12	KDELC2	protein_coding	KDEL motif containing 2 [Source:HGNC Symbol;Acc:HGNC:28496]
ENSG00000178307.9	TMEM11	protein_coding	transmembrane protein 11 [Source:HGNC Symbol;Acc:HGNC:16823]
ENSG00000178896.8	EXOSC4	protein_coding	exosome component 4 [Source:HGNC Symbol;Acc:HGNC:18189]
ENSG00000178927.17	C17orf62	protein_coding	chromosome 17 open reading frame 62 [Source:HGNC Symbol;Acc:HGNC:28672]
ENSG00000179115.10	FARSA	protein_coding	phenylalanyl-tRNA synthetase alpha subunit [Source:HGNC Symbol;Acc:HGNC:3592]
ENSG00000179152.19	TCAIM	protein_coding	T-cell activation inhibitor, mitochondrial [Source:HGNC Symbol;Acc:HGNC:25241]
ENSG00000179195.15	ZNF664	protein_coding	zinc finger protein 664 [Source:HGNC Symbol;Acc:HGNC:25406]
ENSG00000179335.18	CLK3	protein_coding	CDC like kinase 3 [Source:HGNC Symbol;Acc:HGNC:2071]
ENSG00000179364.13	PACS2	protein_coding	phosphofurin acidic cluster sorting protein 2 [Source:HGNC Symbol;Acc:HGNC:23794]
ENSG00000179387.9	ELMOD2	protein_coding	ELMO domain containing 2 [Source:HGNC Symbol;Acc:HGNC:28111]
ENSG00000179409.10	GEMIN4	protein_coding	gem nuclear organelle associated protein 4 [Source:HGNC Symbol;Acc:HGNC:15717]
ENSG00000179583.18	CIITA	protein_coding	class II major histocompatibility complex transactivator [Source:HGNC Symbol;Acc:HGNC:7067]
ENSG00000179750.15	APOBEC3B	protein_coding	apolipoprotein B mRNA editing enzyme catalytic subunit 3B [Source:HGNC Symbol;Acc:HGNC:17352]
ENSG00000179820.15	MYADM	protein_coding	myeloid associated differentiation marker [Source:HGNC Symbol;Acc:HGNC:7544]
ENSG00000180089.5	TMEM86B	protein_coding	transmembrane protein 86B [Source:HGNC Symbol;Acc:HGNC:28448]
ENSG00000180228.12	PRKRA	protein_coding	protein activator of interferon induced protein kinase EIF2AK2 [Source:HGNC Symbol;Acc:HGNC:9438]
ENSG00000180834.7	MAP6D1	protein_coding	MAP6 domain containing 1 [Source:HGNC Symbol;Acc:HGNC:25753]
ENSG00000181031.15	RPH3AL	protein_coding	rabphilin 3A like (without C2 domains) [Source:HGNC Symbol;Acc:HGNC:10296]
ENSG00000181045.14	SLC26A11	protein_coding	solute carrier family 26 member 11 [Source:HGNC Symbol;Acc:HGNC:14471]
ENSG00000181396.12	OGFOD3	protein_coding	2-oxoglutarate and iron dependent oxygenase domain containing 3 [Source:HGNC Symbol;Acc:HGNC:26174]
ENSG00000181666.17	HKR1	protein_coding	HKR1, GLI-Kruppel zinc finger family member [Source:HGNC Symbol;Acc:HGNC:4928]
ENSG00000181991.15	MRPS11	protein_coding	mitochondrial ribosomal protein S11 [Source:HGNC Symbol;Acc:HGNC:14050]
ENSG00000182004.12	SNRPE	protein_coding	small nuclear ribonucleoprotein polypeptide E [Source:HGNC Symbol;Acc:HGNC:11161]
ENSG00000182093.14	WRB	protein_coding	tryptophan rich basic protein [Source:HGNC Symbol;Acc:HGNC:12790]
ENSG00000182141.10	ZNF708	protein_coding	zinc finger protein 708 [Source:HGNC Symbol;Acc:HGNC:12945]
ENSG00000182149.20	IST1	protein_coding	IST1, ESCRT-III associated factor [Source:HGNC Symbol;Acc:HGNC:28977]
ENSG00000182173.12	TSEN54	protein_coding	tRNA splicing endonuclease subunit 54 [Source:HGNC Symbol;Acc:HGNC:27561]
ENSG00000182179.12	UBA7	protein_coding	ubiquitin like modifier activating enzyme 7 [Source:HGNC Symbol;Acc:HGNC:12471]
ENSG00000182324.6	KCNJ14	protein_coding	potassium voltage-gated channel subfamily J member 14 [Source:HGNC Symbol;Acc:HGNC:6260]
ENSG00000182504.10	CEP97	protein_coding	centrosomal protein 97 [Source:HGNC Symbol;Acc:HGNC:26244]
ENSG00000182919.14	C11orf54	protein_coding	chromosome 11 open reading frame 54 [Source:HGNC Symbol;Acc:HGNC:30204]
ENSG00000182973.18	CNOT10	protein_coding	CCR4-NOT transcription complex subunit 10 [Source:HGNC Symbol;Acc:HGNC:23817]
ENSG00000182985.17	CADM1	protein_coding	cell adhesion molecule 1 [Source:HGNC Symbol;Acc:HGNC:5951]
ENSG00000183032.11	SLC25A21	protein_coding	solute carrier family 25 member 21 [Source:HGNC Symbol;Acc:HGNC:14411]
ENSG00000183137.14	CEP57L1	protein_coding	centrosomal protein 57 like 1 [Source:HGNC Symbol;Acc:HGNC:21561]
ENSG00000183207.13	RUVBL2	protein_coding	RuvB like AAA ATPase 2 [Source:HGNC Symbol;Acc:HGNC:10475]
ENSG00000183648.9	NDUFB1	protein_coding	NADH:ubiquinone oxidoreductase subunit B1 [Source:HGNC Symbol;Acc:HGNC:7695]
ENSG00000183963.18	SMTN	protein_coding	smoothelin [Source:HGNC Symbol;Acc:HGNC:11126]
ENSG00000184012.11	TMPRSS2	protein_coding	transmembrane protease, serine 2 [Source:HGNC Symbol;Acc:HGNC:11876]
ENSG00000184014.7	DENND5A	protein_coding	DENN domain containing 5A [Source:HGNC Symbol;Acc:HGNC:19344]
ENSG00000184220.11	CMSS1	protein_coding	cms1 ribosomal small subunit homolog (yeast) [Source:HGNC Symbol;Acc:HGNC:28666]
ENSG00000184517.11	ZFP1	protein_coding	ZFP1 zinc finger protein [Source:HGNC Symbol;Acc:HGNC:23328]
ENSG00000184588.17	PDE4B	protein_coding	phosphodiesterase 4B [Source:HGNC Symbol;Acc:HGNC:8781]
ENSG00000184809.12	B3GALT5-AS1	antisense_RNA	B3GALT5 antisense RNA 1 [Source:HGNC Symbol;Acc:HGNC:16424]
ENSG00000184867.13	ARMCX2	protein_coding	armadillo repeat containing, X-linked 2 [Source:HGNC Symbol;Acc:HGNC:16869]
ENSG00000184903.9	IMMP2L	protein_coding	inner mitochondrial membrane peptidase subunit 2 [Source:HGNC Symbol;Acc:HGNC:14598]
ENSG00000185022.11	MAFF	protein_coding	MAF bZIP transcription factor F [Source:HGNC Symbol;Acc:HGNC:6780]
ENSG00000185238.12	PRMT3	protein_coding	protein arginine methyltransferase 3 [Source:HGNC Symbol;Acc:HGNC:30163]
ENSG00000185246.17	PRPF39	protein_coding	pre-mRNA processing factor 39 [Source:HGNC Symbol;Acc:HGNC:20314]
ENSG00000185347.17	C14orf80	protein_coding	chromosome 14 open reading frame 80 [Source:HGNC Symbol;Acc:HGNC:20127]
ENSG00000185379.20	RAD51D	protein_coding	RAD51 paralog D [Source:HGNC Symbol;Acc:HGNC:9823]
ENSG00000185480.11	PARPBP	protein_coding	PARP1 binding protein [Source:HGNC Symbol;Acc:HGNC:26074]
ENSG00000185532.15	PRKG1	protein_coding	protein kinase, cGMP-dependent, type I [Source:HGNC Symbol;Acc:HGNC:9414]
ENSG00000185627.17	PSMD13	protein_coding	proteasome 26S subunit, non-ATPase 13 [Source:HGNC Symbol;Acc:HGNC:9558]
ENSG00000185658.13	BRWD1	protein_coding	bromodomain and WD repeat domain containing 1 [Source:HGNC Symbol;Acc:HGNC:12760]
ENSG00000185664.14	PMEL	protein_coding	premelanosome protein [Source:HGNC Symbol;Acc:HGNC:10880]
ENSG00000185697.16	MYBL1	protein_coding	MYB proto-oncogene like 1 [Source:HGNC Symbol;Acc:HGNC:7547]
ENSG00000185722.16	ANKFY1	protein_coding	ankyrin repeat and FYVE domain containing 1 [Source:HGNC Symbol;Acc:HGNC:20763]
ENSG00000185842.15	DNAH14	protein_coding	dynein axonemal heavy chain 14 [Source:HGNC Symbol;Acc:HGNC:2945]
ENSG00000186017.14	ZNF566	protein_coding	zinc finger protein 566 [Source:HGNC Symbol;Acc:HGNC:25919]
ENSG00000186104.10	CYP2R1	protein_coding	cytochrome P450 family 2 subfamily R member 1 [Source:HGNC Symbol;Acc:HGNC:20580]
ENSG00000186162.10	CIDECP	transcribed_unprocessed_pseudogene	cell death-inducing DFFA-like effector c pseudogene [Source:HGNC Symbol;Acc:HGNC:24230]
ENSG00000186184.16	POLR1D	protein_coding	RNA polymerase I subunit D [Source:HGNC Symbol;Acc:HGNC:20422]
ENSG00000186522.14	2010-09-01	protein_coding	septin 10 [Source:HGNC Symbol;Acc:HGNC:14349]
ENSG00000186591.11	UBE2H	protein_coding	ubiquitin conjugating enzyme E2 H [Source:HGNC Symbol;Acc:HGNC:12484]
ENSG00000186594.14	MIR22HG	lincRNA	MIR22 host gene [Source:HGNC Symbol;Acc:HGNC:28219]
ENSG00000186665.9	C17orf58	protein_coding	chromosome 17 open reading frame 58 [Source:HGNC Symbol;Acc:HGNC:27568]
ENSG00000186787.8	SPIN2B	protein_coding	spindlin family member 2B [Source:HGNC Symbol;Acc:HGNC:33147]
ENSG00000187118.12	CMC1	protein_coding	C-X9-C motif containing 1 [Source:HGNC Symbol;Acc:HGNC:28783]
ENSG00000187172.15	BAGE2	transcribed_unprocessed_pseudogene	BAGE family member 2 [Source:HGNC Symbol;Acc:HGNC:15723]
ENSG00000187266.13	EPOR	protein_coding	erythropoietin receptor [Source:HGNC Symbol;Acc:HGNC:3416]
ENSG00000187607.15	ZNF286A	protein_coding	zinc finger protein 286A [Source:HGNC Symbol;Acc:HGNC:13501]
ENSG00000187741.14	FANCA	protein_coding	Fanconi anemia complementation group A [Source:HGNC Symbol;Acc:HGNC:3582]
ENSG00000187790.10	FANCM	protein_coding	Fanconi anemia complementation group M [Source:HGNC Symbol;Acc:HGNC:23168]
ENSG00000187954.12	CYHR1	protein_coding	cysteine and histidine rich 1 [Source:HGNC Symbol;Acc:HGNC:17806]
ENSG00000188130.13	MAPK12	protein_coding	mitogen-activated protein kinase 12 [Source:HGNC Symbol;Acc:HGNC:6874]
ENSG00000188315.7	C3orf62	protein_coding	chromosome 3 open reading frame 62 [Source:HGNC Symbol;Acc:HGNC:24771]
ENSG00000188321.13	ZNF559	protein_coding	zinc finger protein 559 [Source:HGNC Symbol;Acc:HGNC:28197]
ENSG00000188493.14	C19orf54	protein_coding	chromosome 19 open reading frame 54 [Source:HGNC Symbol;Acc:HGNC:24758]
ENSG00000188566.13	NDOR1	protein_coding	NADPH dependent diflavin oxidoreductase 1 [Source:HGNC Symbol;Acc:HGNC:29838]
ENSG00000188611.14	ASAH2	protein_coding	N-acylsphingosine amidohydrolase 2 [Source:HGNC Symbol;Acc:HGNC:18860]
ENSG00000189159.15	JPT1	protein_coding	Jupiter microtubule associated homolog 1 [Source:HGNC Symbol;Acc:HGNC:14569]
ENSG00000189223.14	PAX8-AS1	processed_transcript	PAX8 antisense RNA 1 [Source:HGNC Symbol;Acc:HGNC:49271]
ENSG00000189334.8	S100A14	protein_coding	S100 calcium binding protein A14 [Source:HGNC Symbol;Acc:HGNC:18901]
ENSG00000196136.17	SERPINA3	protein_coding	serpin family A member 3 [Source:HGNC Symbol;Acc:HGNC:16]
ENSG00000196141.13	SPATS2L	protein_coding	spermatogenesis associated serine rich 2 like [Source:HGNC Symbol;Acc:HGNC:24574]
ENSG00000196172.9	ZNF681	protein_coding	zinc finger protein 681 [Source:HGNC Symbol;Acc:HGNC:26457]
ENSG00000196187.11	TMEM63A	protein_coding	transmembrane protein 63A [Source:HGNC Symbol;Acc:HGNC:29118]
ENSG00000196428.12	TSC22D2	protein_coding	TSC22 domain family member 2 [Source:HGNC Symbol;Acc:HGNC:29095]
ENSG00000196497.16	IPO4	protein_coding	importin 4 [Source:HGNC Symbol;Acc:HGNC:19426]
ENSG00000196498.13	NCOR2	protein_coding	nuclear receptor corepressor 2 [Source:HGNC Symbol;Acc:HGNC:7673]
ENSG00000196502.11	SULT1A1	protein_coding	sulfotransferase family 1A member 1 [Source:HGNC Symbol;Acc:HGNC:11453]
ENSG00000196517.11	SLC6A9	protein_coding	solute carrier family 6 member 9 [Source:HGNC Symbol;Acc:HGNC:11056]
ENSG00000196526.10	AFAP1	protein_coding	actin filament associated protein 1 [Source:HGNC Symbol;Acc:HGNC:24017]
ENSG00000196531.10	NACA	protein_coding	nascent polypeptide-associated complex alpha subunit [Source:HGNC Symbol;Acc:HGNC:7629]
ENSG00000196535.15	MYO18A	protein_coding	myosin XVIIIA [Source:HGNC Symbol;Acc:HGNC:31104]
ENSG00000196591.11	HDAC2	protein_coding	histone deacetylase 2 [Source:HGNC Symbol;Acc:HGNC:4853]
ENSG00000196646.11	ZNF136	protein_coding	zinc finger protein 136 [Source:HGNC Symbol;Acc:HGNC:12920]
ENSG00000196670.13	ZFP62	protein_coding	ZFP62 zinc finger protein [Source:HGNC Symbol;Acc:HGNC:23241]
ENSG00000196704.11	AMZ2	protein_coding	archaelysin family metallopeptidase 2 [Source:HGNC Symbol;Acc:HGNC:28041]
ENSG00000196712.17	NF1	protein_coding	neurofibromin 1 [Source:HGNC Symbol;Acc:HGNC:7765]
ENSG00000196724.12	ZNF418	protein_coding	zinc finger protein 418 [Source:HGNC Symbol;Acc:HGNC:20647]
ENSG00000196739.14	COL27A1	protein_coding	collagen type XXVII alpha 1 chain [Source:HGNC Symbol;Acc:HGNC:22986]
ENSG00000196756.11	SNHG17	processed_transcript	small nucleolar RNA host gene 17 [Source:HGNC Symbol;Acc:HGNC:48600]
ENSG00000196792.11	STRN3	protein_coding	striatin 3 [Source:HGNC Symbol;Acc:HGNC:15720]
ENSG00000196876.15	SCN8A	protein_coding	sodium voltage-gated channel alpha subunit 8 [Source:HGNC Symbol;Acc:HGNC:10596]
ENSG00000197008.9	ZNF138	protein_coding	zinc finger protein 138 [Source:HGNC Symbol;Acc:HGNC:12922]
ENSG00000197021.8	CXorf40B	protein_coding	chromosome X open reading frame 40B [Source:HGNC Symbol;Acc:HGNC:17402]
ENSG00000197045.12	GMFB	protein_coding	glia maturation factor beta [Source:HGNC Symbol;Acc:HGNC:4373]
ENSG00000197119.12	SLC25A29	protein_coding	solute carrier family 25 member 29 [Source:HGNC Symbol;Acc:HGNC:20116]
ENSG00000197223.11	C1D	protein_coding	C1D nuclear receptor corepressor [Source:HGNC Symbol;Acc:HGNC:29911]
ENSG00000197302.10	ZNF720	protein_coding	zinc finger protein 720 [Source:HGNC Symbol;Acc:HGNC:26987]
ENSG00000197483.9	ZNF628	protein_coding	zinc finger protein 628 [Source:HGNC Symbol;Acc:HGNC:28054]
ENSG00000197530.12	MIB2	protein_coding	mindbomb E3 ubiquitin protein ligase 2 [Source:HGNC Symbol;Acc:HGNC:30577]
ENSG00000197563.10	PIGN	protein_coding	phosphatidylinositol glycan anchor biosynthesis class N [Source:HGNC Symbol;Acc:HGNC:8967]
ENSG00000197586.12	ENTPD6	protein_coding	ectonucleoside triphosphate diphosphohydrolase 6 (putative) [Source:HGNC Symbol;Acc:HGNC:3368]
ENSG00000197619.13	ZNF615	protein_coding	zinc finger protein 615 [Source:HGNC Symbol;Acc:HGNC:24740]
ENSG00000197647.11	ZNF433	protein_coding	zinc finger protein 433 [Source:HGNC Symbol;Acc:HGNC:20811]
ENSG00000197782.14	ZNF780A	protein_coding	zinc finger protein 780A [Source:HGNC Symbol;Acc:HGNC:27603]
ENSG00000197808.11	ZNF461	protein_coding	zinc finger protein 461 [Source:HGNC Symbol;Acc:HGNC:21629]
ENSG00000197857.13	ZNF44	protein_coding	zinc finger protein 44 [Source:HGNC Symbol;Acc:HGNC:13110]
ENSG00000198015.12	MRPL42	protein_coding	mitochondrial ribosomal protein L42 [Source:HGNC Symbol;Acc:HGNC:14493]
ENSG00000198089.15	SFI1	protein_coding	SFI1 centrin binding protein [Source:HGNC Symbol;Acc:HGNC:29064]
ENSG00000198169.8	ZNF251	protein_coding	zinc finger protein 251 [Source:HGNC Symbol;Acc:HGNC:13045]
ENSG00000198182.12	ZNF607	protein_coding	zinc finger protein 607 [Source:HGNC Symbol;Acc:HGNC:28192]
ENSG00000198252.11	STYX	protein_coding	serine/threonine/tyrosine interacting protein [Source:HGNC Symbol;Acc:HGNC:11447]
ENSG00000198265.11	HELZ	protein_coding	helicase with zinc finger [Source:HGNC Symbol;Acc:HGNC:16878]
ENSG00000198420.9	TCAF1	protein_coding	TRPM8 channel associated factor 1 [Source:HGNC Symbol;Acc:HGNC:22201]
ENSG00000198492.15	YTHDF2	protein_coding	YTH N6-methyladenosine RNA binding protein 2 [Source:HGNC Symbol;Acc:HGNC:31675]
ENSG00000198598.6	MMP17	protein_coding	matrix metallopeptidase 17 [Source:HGNC Symbol;Acc:HGNC:7163]
ENSG00000198707.14	CEP290	protein_coding	centrosomal protein 290 [Source:HGNC Symbol;Acc:HGNC:29021]
ENSG00000198720.12	ANKRD13B	protein_coding	ankyrin repeat domain 13B [Source:HGNC Symbol;Acc:HGNC:26363]
ENSG00000198722.14	UNC13B	protein_coding	unc-13 homolog B [Source:HGNC Symbol;Acc:HGNC:12566]
ENSG00000198746.12	GPATCH3	protein_coding	G-patch domain containing 3 [Source:HGNC Symbol;Acc:HGNC:25720]
ENSG00000198752.10	CDC42BPB	protein_coding	CDC42 binding protein kinase beta [Source:HGNC Symbol;Acc:HGNC:1738]
ENSG00000198931.10	APRT	protein_coding	adenine phosphoribosyltransferase [Source:HGNC Symbol;Acc:HGNC:626]
ENSG00000203780.10	FANK1	protein_coding	fibronectin type III and ankyrin repeat domains 1 [Source:HGNC Symbol;Acc:HGNC:23527]
ENSG00000203879.11	GDI1	protein_coding	GDP dissociation inhibitor 1 [Source:HGNC Symbol;Acc:HGNC:4226]
ENSG00000203880.11	PCMTD2	protein_coding	protein-L-isoaspartate (D-aspartate) O-methyltransferase domain containing 2 [Source:HGNC Symbol;Acc:HGNC:15882]
ENSG00000203950.6	RTL8A	protein_coding	retrotransposon Gag like 8A [Source:HGNC Symbol;Acc:HGNC:24514]
ENSG00000203993.4	ARRDC1-AS1	antisense_RNA	ARRDC1 antisense RNA 1 [Source:HGNC Symbol;Acc:HGNC:23395]
ENSG00000204116.11	CHIC1	protein_coding	cysteine rich hydrophobic domain 1 [Source:HGNC Symbol;Acc:HGNC:1934]
ENSG00000204237.4	OXLD1	protein_coding	oxidoreductase like domain containing 1 [Source:HGNC Symbol;Acc:HGNC:27901]
ENSG00000204271.12	SPIN3	protein_coding	spindlin family member 3 [Source:HGNC Symbol;Acc:HGNC:27272]
ENSG00000204498.10	NFKBIL1	protein_coding	NFKB inhibitor like 1 [Source:HGNC Symbol;Acc:HGNC:7800]
ENSG00000204516.9	MICB	protein_coding	MHC class I polypeptide-related sequence B [Source:HGNC Symbol;Acc:HGNC:7091]
ENSG00000204568.11	MRPS18B	protein_coding	mitochondrial ribosomal protein S18B [Source:HGNC Symbol;Acc:HGNC:14516]
ENSG00000204764.13	RANBP17	protein_coding	RAN binding protein 17 [Source:HGNC Symbol;Acc:HGNC:14428]
ENSG00000205060.10	SLC35B4	protein_coding	solute carrier family 35 member B4 [Source:HGNC Symbol;Acc:HGNC:20584]
ENSG00000205133.11	TRIQK	protein_coding	triple QxxK/R motif containing [Source:HGNC Symbol;Acc:HGNC:27828]
ENSG00000205220.11	PSMB10	protein_coding	proteasome subunit beta 10 [Source:HGNC Symbol;Acc:HGNC:9538]
ENSG00000205436.7	EXOC3L4	protein_coding	exocyst complex component 3 like 4 [Source:HGNC Symbol;Acc:HGNC:20120]
ENSG00000205531.12	NAP1L4	protein_coding	nucleosome assembly protein 1 like 4 [Source:HGNC Symbol;Acc:HGNC:7640]
ENSG00000205937.11	RNPS1	protein_coding	RNA binding protein with serine rich domain 1 [Source:HGNC Symbol;Acc:HGNC:10080]
ENSG00000205981.6	DNAJC19	protein_coding	DnaJ heat shock protein family (Hsp40) member C19 [Source:HGNC Symbol;Acc:HGNC:30528]
ENSG00000206053.12	JPT2	protein_coding	Jupiter microtubule associated homolog 2 [Source:HGNC Symbol;Acc:HGNC:14137]
ENSG00000211445.11	GPX3	protein_coding	glutathione peroxidase 3 [Source:HGNC Symbol;Acc:HGNC:4555]
ENSG00000213020.9	ZNF611	protein_coding	zinc finger protein 611 [Source:HGNC Symbol;Acc:HGNC:28766]
ENSG00000213225.7	NOC2LP1	transcribed_processed_pseudogene	NOC2 like nucleolar associated transcriptional repressor pseudogene 1 [Source:HGNC Symbol;Acc:HGNC:52285]
ENSG00000213445.9	SIPA1	protein_coding	signal-induced proliferation-associated 1 [Source:HGNC Symbol;Acc:HGNC:10885]
ENSG00000213593.9	TMX2	protein_coding	thioredoxin related transmembrane protein 2 [Source:HGNC Symbol;Acc:HGNC:30739]
ENSG00000213599.10	SLX1A-SULT1A3	processed_transcript	SLX1A-SULT1A3 readthrough (NMD candidate) [Source:HGNC Symbol;Acc:HGNC:44437]
ENSG00000213672.7	NCKIPSD	protein_coding	NCK interacting protein with SH3 domain [Source:HGNC Symbol;Acc:HGNC:15486]
ENSG00000213689.11	TREX1	protein_coding	three prime repair exonuclease 1 [Source:HGNC Symbol;Acc:HGNC:12269]
ENSG00000213782.7	DDX47	protein_coding	DEAD-box helicase 47 [Source:HGNC Symbol;Acc:HGNC:18682]
ENSG00000213889.10	PPM1N	protein_coding	protein phosphatase, Mg2+/Mn2+ dependent 1N (putative) [Source:HGNC Symbol;Acc:HGNC:26845]
ENSG00000213918.10	DNASE1	protein_coding	deoxyribonuclease 1 [Source:HGNC Symbol;Acc:HGNC:2956]
ENSG00000213930.11	GALT	protein_coding	galactose-1-phosphate uridylyltransferase [Source:HGNC Symbol;Acc:HGNC:4135]
ENSG00000213983.11	AP1G2	protein_coding	adaptor related protein complex 1 gamma 2 subunit [Source:HGNC Symbol;Acc:HGNC:556]
ENSG00000214021.15	TTLL3	protein_coding	tubulin tyrosine ligase like 3 [Source:HGNC Symbol;Acc:HGNC:24483]
ENSG00000214078.12	CPNE1	protein_coding	copine 1 [Source:HGNC Symbol;Acc:HGNC:2314]
ENSG00000214135.8	AC132008.2	transcribed_unprocessed_pseudogene
ENSG00000214160.9	ALG3	protein_coding	ALG3, alpha-1,3- mannosyltransferase [Source:HGNC Symbol;Acc:HGNC:23056]
ENSG00000214756.7	METTL12	protein_coding	methyltransferase like 12 [Source:HGNC Symbol;Acc:HGNC:33113]
ENSG00000215190.9	LINC00680	transcribed_unprocessed_pseudogene	long intergenic non-protein coding RNA 680 [Source:HGNC Symbol;Acc:HGNC:44417]
ENSG00000215193.12	PEX26	protein_coding	peroxisomal biogenesis factor 26 [Source:HGNC Symbol;Acc:HGNC:22965]
ENSG00000215386.11	MIR99AHG	lincRNA	mir-99a-let-7c cluster host gene [Source:HGNC Symbol;Acc:HGNC:1274]
ENSG00000215908.10	CROCCP2	transcribed_unprocessed_pseudogene	ciliary rootlet coiled-coil, rootletin pseudogene 2 [Source:HGNC Symbol;Acc:HGNC:28170]
ENSG00000217128.11	FNIP1	protein_coding	folliculin interacting protein 1 [Source:HGNC Symbol;Acc:HGNC:29418]
ENSG00000219200.11	RNASEK	protein_coding	ribonuclease K [Source:HGNC Symbol;Acc:HGNC:33911]
ENSG00000221838.9	AP4M1	protein_coding	adaptor related protein complex 4 mu 1 subunit [Source:HGNC Symbol;Acc:HGNC:574]
ENSG00000221909.2	FAM200A	protein_coding	family with sequence similarity 200 member A [Source:HGNC Symbol;Acc:HGNC:25401]
ENSG00000221978.11	CCNL2	protein_coding	cyclin L2 [Source:HGNC Symbol;Acc:HGNC:20570]
ENSG00000221988.12	PPT2	protein_coding	palmitoyl-protein thioesterase 2 [Source:HGNC Symbol;Acc:HGNC:9326]
ENSG00000224032.6	EPB41L4A-AS1	lincRNA	EPB41L4A antisense RNA 1 [Source:HGNC Symbol;Acc:HGNC:30749]
ENSG00000224281.4	SLC25A5-AS1	processed_transcript	SLC25A5 antisense RNA 1 [Source:HGNC Symbol;Acc:HGNC:43438]
ENSG00000225190.10	PLEKHM1	protein_coding	pleckstrin homology and RUN domain containing M1 [Source:HGNC Symbol;Acc:HGNC:29017]
ENSG00000225335.3	AC016027.1	antisense_RNA
ENSG00000225484.6	NUTM2B-AS1	antisense_RNA	NUTM2B antisense RNA 1 [Source:HGNC Symbol;Acc:HGNC:51204]
ENSG00000226137.5	BAIAP2-AS1	lincRNA	BAIAP2 antisense RNA 1 (head to head) [Source:HGNC Symbol;Acc:HGNC:44342]
ENSG00000226287.8	TMEM191A	transcribed_unprocessed_pseudogene	transmembrane protein 191A (pseudogene) [Source:HGNC Symbol;Acc:HGNC:25317]
ENSG00000226752.9	PSMD5-AS1	transcribed_unitary_pseudogene	PSMD5 antisense RNA 1 (head to head) [Source:HGNC Symbol;Acc:HGNC:27367]
ENSG00000227036.6	LINC00511	lincRNA	long intergenic non-protein coding RNA 511 [Source:HGNC Symbol;Acc:HGNC:43564]
ENSG00000227345.8	PARG	protein_coding	poly(ADP-ribose) glycohydrolase [Source:HGNC Symbol;Acc:HGNC:8605]
ENSG00000227507.2	LTB	protein_coding	lymphotoxin beta [Source:HGNC Symbol;Acc:HGNC:6711]
ENSG00000228300.13	C19orf24	protein_coding	chromosome 19 open reading frame 24 [Source:HGNC Symbol;Acc:HGNC:26073]
ENSG00000228748.2	AL450306.1	antisense_RNA
ENSG00000229117.8	RPL41	protein_coding	ribosomal protein L41 [Source:HGNC Symbol;Acc:HGNC:10354]
ENSG00000230513.1	THAP7-AS1	antisense_RNA	THAP7 antisense RNA 1 [Source:HGNC Symbol;Acc:HGNC:41013]
ENSG00000230606.10	AC092683.1	lincRNA
ENSG00000231365.5	AL359915.2	antisense_RNA
ENSG00000232956.8	SNHG15	lincRNA	small nucleolar RNA host gene 15 [Source:HGNC Symbol;Acc:HGNC:27797]
ENSG00000233327.10	USP32P2	transcribed_unprocessed_pseudogene	ubiquitin specific peptidase 32 pseudogene 2 [Source:HGNC Symbol;Acc:HGNC:30751]
ENSG00000233429.9	HOTAIRM1	antisense_RNA	HOXA transcript antisense RNA, myeloid-specific 1 [Source:HGNC Symbol;Acc:HGNC:37117]
ENSG00000234171.2	RNASEH1-AS1	antisense_RNA	RNASEH1 antisense RNA 1 [Source:HGNC Symbol;Acc:HGNC:49289]
ENSG00000234684.6	SDCBP2-AS1	antisense_RNA	SDCBP2 antisense RNA 1 [Source:HGNC Symbol;Acc:HGNC:44314]
ENSG00000234741.7	GAS5	processed_transcript	growth arrest specific 5 (non-protein coding) [Source:HGNC Symbol;Acc:HGNC:16355]
ENSG00000234996.4	AC098934.2	transcribed_processed_pseudogene
ENSG00000235919.4	ASH1L-AS1	antisense_RNA	ASH1L antisense RNA 1 [Source:HGNC Symbol;Acc:HGNC:44146]
ENSG00000235989.3	MORC2-AS1	antisense_RNA	MORC2 antisense RNA 1 [Source:HGNC Symbol;Acc:HGNC:26662]
ENSG00000237491.8	AL669831.5	lincRNA
ENSG00000237732.9	AC010980.1	transcribed_unprocessed_pseudogene
ENSG00000238197.5	PAXBP1-AS1	antisense_RNA	PAXBP1 antisense RNA 1 [Source:HGNC Symbol;Acc:HGNC:39603]
ENSG00000239900.12	ADSL	protein_coding	adenylosuccinate lyase [Source:HGNC Symbol;Acc:HGNC:291]
ENSG00000240771.6	ARHGEF25	protein_coding	Rho guanine nucleotide exchange factor 25 [Source:HGNC Symbol;Acc:HGNC:30275]
ENSG00000240849.10	TMEM189	protein_coding	transmembrane protein 189 [Source:HGNC Symbol;Acc:HGNC:16735]
ENSG00000242110.7	AMACR	protein_coding	alpha-methylacyl-CoA racemase [Source:HGNC Symbol;Acc:HGNC:451]
ENSG00000242247.10	ARFGAP3	protein_coding	ADP ribosylation factor GTPase activating protein 3 [Source:HGNC Symbol;Acc:HGNC:661]
ENSG00000243207.6	PPAN-P2RY11	protein_coding	PPAN-P2RY11 readthrough [Source:HGNC Symbol;Acc:HGNC:33526]
ENSG00000243566.6	UPK3B	protein_coding	uroplakin 3B [Source:HGNC Symbol;Acc:HGNC:21444]
ENSG00000244005.12	NFS1	protein_coding	NFS1, cysteine desulfurase [Source:HGNC Symbol;Acc:HGNC:15910]
ENSG00000248333.8	CDK11B	protein_coding	cyclin dependent kinase 11B [Source:HGNC Symbol;Acc:HGNC:1729]
ENSG00000248360.7	LINC00504	lincRNA	long intergenic non-protein coding RNA 504 [Source:HGNC Symbol;Acc:HGNC:43555]
ENSG00000249115.8	HAUS5	protein_coding	HAUS augmin like complex subunit 5 [Source:HGNC Symbol;Acc:HGNC:29130]
ENSG00000249346.6	LINC01016	lincRNA	long intergenic non-protein coding RNA 1016 [Source:HGNC Symbol;Acc:HGNC:48991]
ENSG00000251247.10	ZNF345	protein_coding	zinc finger protein 345 [Source:HGNC Symbol;Acc:HGNC:16367]
ENSG00000251350.1	LINC02475	lincRNA	long intergenic non-protein coding RNA 2475 [Source:HGNC Symbol;Acc:HGNC:53418]
ENSG00000251664.3	PCDHA12	protein_coding	protocadherin alpha 12 [Source:HGNC Symbol;Acc:HGNC:8666]
ENSG00000251669.5	FAM86EP	transcribed_unprocessed_pseudogene	family with sequence similarity 86 member E, pseudogene [Source:HGNC Symbol;Acc:HGNC:28017]
ENSG00000253293.4	HOXA10	protein_coding	homeobox A10 [Source:HGNC Symbol;Acc:HGNC:5100]
ENSG00000253352.8	TUG1	antisense_RNA	taurine up-regulated 1 (non-protein coding) [Source:HGNC Symbol;Acc:HGNC:26066]
ENSG00000255408.3	PCDHA3	protein_coding	protocadherin alpha 3 [Source:HGNC Symbol;Acc:HGNC:8669]
ENSG00000256269.7	HMBS	protein_coding	hydroxymethylbilane synthase [Source:HGNC Symbol;Acc:HGNC:4982]
ENSG00000257727.5	CNPY2	protein_coding	canopy FGF signaling regulator 2 [Source:HGNC Symbol;Acc:HGNC:13529]
ENSG00000258890.6	CEP95	protein_coding	centrosomal protein 95 [Source:HGNC Symbol;Acc:HGNC:25141]
ENSG00000259248.5	USP3-AS1	antisense_RNA	USP3 antisense RNA 1 [Source:HGNC Symbol;Acc:HGNC:44140]
ENSG00000259431.5	THTPA	protein_coding	thiamine triphosphatase [Source:HGNC Symbol;Acc:HGNC:18987]
ENSG00000260565.6	ERVK13-1	processed_transcript	endogenous retrovirus group K13 member 1 [Source:HGNC Symbol;Acc:HGNC:27548]
ENSG00000263753.6	LINC00667	lincRNA	long intergenic non-protein coding RNA 667 [Source:HGNC Symbol;Acc:HGNC:27906]
ENSG00000263956.6	NBPF11	protein_coding	NBPF member 11 [Source:HGNC Symbol;Acc:HGNC:31993]
ENSG00000265148.5	TSPOAP1-AS1	antisense_RNA	TSPOAP1 antisense RNA 1 [Source:HGNC Symbol;Acc:HGNC:44148]
ENSG00000265778.2	AC018413.1	antisense_RNA
ENSG00000267278.5	MAP3K14-AS1	antisense_RNA	MAP3K14 antisense RNA 1 [Source:HGNC Symbol;Acc:HGNC:44359]
ENSG00000267751.5	AC009005.1	antisense_RNA
ENSG00000269335.5	IKBKG	protein_coding	inhibitor of nuclear factor kappa B kinase subunit gamma [Source:HGNC Symbol;Acc:HGNC:5961]
ENSG00000269713.7	NBPF9	protein_coding	NBPF member 9 [Source:HGNC Symbol;Acc:HGNC:31991]
ENSG00000269837.1	IPO5P1	transcribed_processed_pseudogene	importin 5 pseudogene 1 [Source:HGNC Symbol;Acc:HGNC:49687]
ENSG00000272333.5	KMT2B	protein_coding	lysine methyltransferase 2B [Source:HGNC Symbol;Acc:HGNC:15840]
ENSG00000272414.5	FAM47E-STBD1	protein_coding	FAM47E-STBD1 readthrough [Source:HGNC Symbol;Acc:HGNC:44667]
ENSG00000272886.5	DCP1A	protein_coding	decapping mRNA 1A [Source:HGNC Symbol;Acc:HGNC:18714]
ENSG00000273611.4	ZNHIT3	protein_coding	zinc finger HIT-type containing 3 [Source:HGNC Symbol;Acc:HGNC:12309]
ENSG00000273899.4	NOL12	protein_coding	nucleolar protein 12 [Source:HGNC Symbol;Acc:HGNC:28585]
ENSG00000275052.4	PPP4R3B	protein_coding	protein phosphatase 4 regulatory subunit 3B [Source:HGNC Symbol;Acc:HGNC:29267]
ENSG00000278259.4	MYO19	protein_coding	myosin XIX [Source:HGNC Symbol;Acc:HGNC:26234]
ENSG00000278318.4	ZNF229	protein_coding	zinc finger protein 229 [Source:HGNC Symbol;Acc:HGNC:13022]
ENSG00000281571.2	AC241585.3	TEC
ENSG00000281649.1	EBLN3P	lincRNA	endogenous Bornavirus-like nucleoprotein 3, pseudogene [Source:HGNC Symbol;Acc:HGNC:50682]

## Sheet: APA_genes
Gene stable ID version	Gene name	Gene type	Gene description
ENSG00000001631.15	KRIT1	protein_coding	KRIT1, ankyrin repeat containing [Source:HGNC Symbol;Acc:HGNC:1573]
ENSG00000002330.13	BAD	protein_coding	BCL2 associated agonist of cell death [Source:HGNC Symbol;Acc:HGNC:936]
ENSG00000002834.17	LASP1	protein_coding	LIM and SH3 protein 1 [Source:HGNC Symbol;Acc:HGNC:6513]
ENSG00000003096.14	KLHL13	protein_coding	kelch like family member 13 [Source:HGNC Symbol;Acc:HGNC:22931]
ENSG00000003402.19	CFLAR	protein_coding	CASP8 and FADD like apoptosis regulator [Source:HGNC Symbol;Acc:HGNC:1876]
ENSG00000004139.13	SARM1	protein_coding	sterile alpha and TIR motif containing 1 [Source:HGNC Symbol;Acc:HGNC:17074]
ENSG00000004399.12	PLXND1	protein_coding	plexin D1 [Source:HGNC Symbol;Acc:HGNC:9107]
ENSG00000004779.9	NDUFAB1	protein_coding	NADH:ubiquinone oxidoreductase subunit AB1 [Source:HGNC Symbol;Acc:HGNC:7694]
ENSG00000005100.12	DHX33	protein_coding	DEAH-box helicase 33 [Source:HGNC Symbol;Acc:HGNC:16718]
ENSG00000005486.16	RHBDD2	protein_coding	rhomboid domain containing 2 [Source:HGNC Symbol;Acc:HGNC:23082]
ENSG00000006432.15	MAP3K9	protein_coding	mitogen-activated protein kinase kinase kinase 9 [Source:HGNC Symbol;Acc:HGNC:6861]
ENSG00000006459.10	KDM7A	protein_coding	lysine demethylase 7A [Source:HGNC Symbol;Acc:HGNC:22224]
ENSG00000007047.14	MARK4	protein_coding	microtubule affinity regulating kinase 4 [Source:HGNC Symbol;Acc:HGNC:13538]
ENSG00000007341.18	ST7L	protein_coding	suppression of tumorigenicity 7 like [Source:HGNC Symbol;Acc:HGNC:18441]
ENSG00000007402.11	CACNA2D2	protein_coding	calcium voltage-gated channel auxiliary subunit alpha2delta 2 [Source:HGNC Symbol;Acc:HGNC:1400]
ENSG00000008382.15	MPND	protein_coding	MPN domain containing [Source:HGNC Symbol;Acc:HGNC:25934]
ENSG00000008838.19	MED24	protein_coding	mediator complex subunit 24 [Source:HGNC Symbol;Acc:HGNC:22963]
ENSG00000010072.15	SPRTN	protein_coding	SprT-like N-terminal domain [Source:HGNC Symbol;Acc:HGNC:25356]
ENSG00000010539.11	ZNF200	protein_coding	zinc finger protein 200 [Source:HGNC Symbol;Acc:HGNC:12993]
ENSG00000010626.14	LRRC23	protein_coding	leucine rich repeat containing 23 [Source:HGNC Symbol;Acc:HGNC:19138]
ENSG00000011638.10	TMEM159	protein_coding	transmembrane protein 159 [Source:HGNC Symbol;Acc:HGNC:30136]
ENSG00000012822.15	CALCOCO1	protein_coding	calcium binding and coiled-coil domain 1 [Source:HGNC Symbol;Acc:HGNC:29306]
ENSG00000013306.15	SLC25A39	protein_coding	solute carrier family 25 member 39 [Source:HGNC Symbol;Acc:HGNC:24279]
ENSG00000019582.14	CD74	protein_coding	CD74 molecule [Source:HGNC Symbol;Acc:HGNC:1697]
ENSG00000023734.10	STRAP	protein_coding	serine/threonine kinase receptor associated protein [Source:HGNC Symbol;Acc:HGNC:30796]
ENSG00000023909.9	GCLM	protein_coding	glutamate-cysteine ligase modifier subunit [Source:HGNC Symbol;Acc:HGNC:4312]
ENSG00000025423.11	HSD17B6	protein_coding	hydroxysteroid 17-beta dehydrogenase 6 [Source:HGNC Symbol;Acc:HGNC:23316]
ENSG00000026103.21	FAS	protein_coding	Fas cell surface death receptor [Source:HGNC Symbol;Acc:HGNC:11920]
ENSG00000033030.13	ZCCHC8	protein_coding	zinc finger CCHC-type containing 8 [Source:HGNC Symbol;Acc:HGNC:25265]
ENSG00000033867.16	SLC4A7	protein_coding	solute carrier family 4 member 7 [Source:HGNC Symbol;Acc:HGNC:11033]
ENSG00000039123.15	SKIV2L2	protein_coding	Ski2 like RNA helicase 2 [Source:HGNC Symbol;Acc:HGNC:18734]
ENSG00000039319.16	ZFYVE16	protein_coding	zinc finger FYVE-type containing 16 [Source:HGNC Symbol;Acc:HGNC:20756]
ENSG00000040341.17	STAU2	protein_coding	staufen double-stranded RNA binding protein 2 [Source:HGNC Symbol;Acc:HGNC:11371]
ENSG00000040933.15	INPP4A	protein_coding	inositol polyphosphate-4-phosphatase type I A [Source:HGNC Symbol;Acc:HGNC:6074]
ENSG00000046651.14	OFD1	protein_coding	OFD1, centriole and centriolar satellite protein [Source:HGNC Symbol;Acc:HGNC:2567]
ENSG00000047315.15	POLR2B	protein_coding	RNA polymerase II subunit B [Source:HGNC Symbol;Acc:HGNC:9188]
ENSG00000047849.21	MAP4	protein_coding	microtubule associated protein 4 [Source:HGNC Symbol;Acc:HGNC:6862]
ENSG00000048162.20	NOP16	protein_coding	NOP16 nucleolar protein [Source:HGNC Symbol;Acc:HGNC:26934]
ENSG00000050426.15	LETMD1	protein_coding	LETM1 domain containing 1 [Source:HGNC Symbol;Acc:HGNC:24241]
ENSG00000051523.10	CYBA	protein_coding	cytochrome b-245 alpha chain [Source:HGNC Symbol;Acc:HGNC:2577]
ENSG00000054148.17	PHPT1	protein_coding	phosphohistidine phosphatase 1 [Source:HGNC Symbol;Acc:HGNC:30033]
ENSG00000054523.17	KIF1B	protein_coding	kinesin family member 1B [Source:HGNC Symbol;Acc:HGNC:16636]
ENSG00000054690.13	PLEKHH1	protein_coding	pleckstrin homology, MyTH4 and FERM domain containing H1 [Source:HGNC Symbol;Acc:HGNC:17733]
ENSG00000055147.18	FAM114A2	protein_coding	family with sequence similarity 114 member A2 [Source:HGNC Symbol;Acc:HGNC:1333]
ENSG00000055163.19	CYFIP2	protein_coding	cytoplasmic FMR1 interacting protein 2 [Source:HGNC Symbol;Acc:HGNC:13760]
ENSG00000055208.18	TAB2	protein_coding	TGF-beta activated kinase 1/MAP3K7 binding protein 2 [Source:HGNC Symbol;Acc:HGNC:17075]
ENSG00000055950.16	MRPL43	protein_coding	mitochondrial ribosomal protein L43 [Source:HGNC Symbol;Acc:HGNC:14517]
ENSG00000056998.19	GYG2	protein_coding	glycogenin 2 [Source:HGNC Symbol;Acc:HGNC:4700]
ENSG00000057294.14	PKP2	protein_coding	plakophilin 2 [Source:HGNC Symbol;Acc:HGNC:9024]
ENSG00000059378.12	PARP12	protein_coding	poly(ADP-ribose) polymerase family member 12 [Source:HGNC Symbol;Acc:HGNC:21919]
ENSG00000059588.9	TARBP1	protein_coding	TAR (HIV-1) RNA binding protein 1 [Source:HGNC Symbol;Acc:HGNC:11568]
ENSG00000059691.11	GATB	protein_coding	glutamyl-tRNA amidotransferase subunit B [Source:HGNC Symbol;Acc:HGNC:8849]
ENSG00000060688.12	SNRNP40	protein_coding	small nuclear ribonucleoprotein U5 subunit 40 [Source:HGNC Symbol;Acc:HGNC:30857]
ENSG00000062370.16	ZNF112	protein_coding	zinc finger protein 112 [Source:HGNC Symbol;Acc:HGNC:12892]
ENSG00000063176.15	SPHK2	protein_coding	sphingosine kinase 2 [Source:HGNC Symbol;Acc:HGNC:18859]
ENSG00000064195.7	DLX3	protein_coding	distal-less homeobox 3 [Source:HGNC Symbol;Acc:HGNC:2916]
ENSG00000064703.11	DDX20	protein_coding	DEAD-box helicase 20 [Source:HGNC Symbol;Acc:HGNC:2743]
ENSG00000065989.15	PDE4A	protein_coding	phosphodiesterase 4A [Source:HGNC Symbol;Acc:HGNC:8780]
ENSG00000066117.14	SMARCD1	protein_coding	SWI/SNF related, matrix associated, actin dependent regulator of chromatin, subfamily d, member 1 [Source:HGNC Symbol;Acc:HGNC:11106]
ENSG00000066427.21	ATXN3	protein_coding	ataxin 3 [Source:HGNC Symbol;Acc:HGNC:7106]
ENSG00000066629.16	EML1	protein_coding	echinoderm microtubule associated protein like 1 [Source:HGNC Symbol;Acc:HGNC:3330]
ENSG00000067248.9	DHX29	protein_coding	DExH-box helicase 29 [Source:HGNC Symbol;Acc:HGNC:15815]
ENSG00000067606.16	PRKCZ	protein_coding	protein kinase C zeta [Source:HGNC Symbol;Acc:HGNC:9412]
ENSG00000068120.14	COASY	protein_coding	Coenzyme A synthase [Source:HGNC Symbol;Acc:HGNC:29932]
ENSG00000068724.15	TTC7A	protein_coding	tetratricopeptide repeat domain 7A [Source:HGNC Symbol;Acc:HGNC:19750]
ENSG00000068745.14	IP6K2	protein_coding	inositol hexakisphosphate kinase 2 [Source:HGNC Symbol;Acc:HGNC:17313]
ENSG00000068878.14	PSME4	protein_coding	proteasome activator subunit 4 [Source:HGNC Symbol;Acc:HGNC:20635]
ENSG00000068885.14	IFT80	protein_coding	intraflagellar transport 80 [Source:HGNC Symbol;Acc:HGNC:29262]
ENSG00000069424.14	KCNAB2	protein_coding	potassium voltage-gated channel subfamily A regulatory beta subunit 2 [Source:HGNC Symbol;Acc:HGNC:6229]
ENSG00000069974.15	RAB27A	protein_coding	RAB27A, member RAS oncogene family [Source:HGNC Symbol;Acc:HGNC:9766]
ENSG00000069998.12	HDHD5	protein_coding	haloacid dehalogenase like hydrolase domain containing 5 [Source:HGNC Symbol;Acc:HGNC:1843]
ENSG00000070087.13	PFN2	protein_coding	profilin 2 [Source:HGNC Symbol;Acc:HGNC:8882]
ENSG00000070413.19	DGCR2	protein_coding	DiGeorge syndrome critical region gene 2 [Source:HGNC Symbol;Acc:HGNC:2845]
ENSG00000070423.17	RNF126	protein_coding	ring finger protein 126 [Source:HGNC Symbol;Acc:HGNC:21151]
ENSG00000070761.7	CFAP20	protein_coding	cilia and flagella associated protein 20 [Source:HGNC Symbol;Acc:HGNC:29523]
ENSG00000071242.11	RPS6KA2	protein_coding	ribosomal protein S6 kinase A2 [Source:HGNC Symbol;Acc:HGNC:10431]
ENSG00000071564.14	TCF3	protein_coding	transcription factor 3 [Source:HGNC Symbol;Acc:HGNC:11633]
ENSG00000072134.15	EPN2	protein_coding	epsin 2 [Source:HGNC Symbol;Acc:HGNC:18639]
ENSG00000072401.14	UBE2D1	protein_coding	ubiquitin conjugating enzyme E2 D1 [Source:HGNC Symbol;Acc:HGNC:12474]
ENSG00000072736.18	NFATC3	protein_coding	nuclear factor of activated T-cells 3 [Source:HGNC Symbol;Acc:HGNC:7777]
ENSG00000072858.10	SIDT1	protein_coding	SID1 transmembrane family member 1 [Source:HGNC Symbol;Acc:HGNC:25967]
ENSG00000072864.14	NDE1	protein_coding	nudE neurodevelopment protein 1 [Source:HGNC Symbol;Acc:HGNC:17619]
ENSG00000072958.8	AP1M1	protein_coding	adaptor related protein complex 1 mu 1 subunit [Source:HGNC Symbol;Acc:HGNC:13667]
ENSG00000075188.8	NUP37	protein_coding	nucleoporin 37 [Source:HGNC Symbol;Acc:HGNC:29929]
ENSG00000075240.16	GRAMD4	protein_coding	GRAM domain containing 4 [Source:HGNC Symbol;Acc:HGNC:29113]
ENSG00000075336.11	TIMM21	protein_coding	translocase of inner mitochondrial membrane 21 [Source:HGNC Symbol;Acc:HGNC:25010]
ENSG00000075539.14	FRYL	protein_coding	FRY like transcription coactivator [Source:HGNC Symbol;Acc:HGNC:29127]
ENSG00000075856.11	SART3	protein_coding	squamous cell carcinoma antigen recognized by T-cells 3 [Source:HGNC Symbol;Acc:HGNC:16860]
ENSG00000076770.14	MBNL3	protein_coding	muscleblind like splicing regulator 3 [Source:HGNC Symbol;Acc:HGNC:20564]
ENSG00000077721.15	UBE2A	protein_coding	ubiquitin conjugating enzyme E2 A [Source:HGNC Symbol;Acc:HGNC:12472]
ENSG00000078061.12	ARAF	protein_coding	A-Raf proto-oncogene, serine/threonine kinase [Source:HGNC Symbol;Acc:HGNC:646]
ENSG00000078070.12	MCCC1	protein_coding	methylcrotonoyl-CoA carboxylase 1 [Source:HGNC Symbol;Acc:HGNC:6936]
ENSG00000078124.11	ACER3	protein_coding	alkaline ceramidase 3 [Source:HGNC Symbol;Acc:HGNC:16066]
ENSG00000078142.12	PIK3C3	protein_coding	phosphatidylinositol 3-kinase catalytic subunit type 3 [Source:HGNC Symbol;Acc:HGNC:8974]
ENSG00000078403.16	MLLT10	protein_coding	MLLT10, histone lysine methyltransferase DOT1L cofactor [Source:HGNC Symbol;Acc:HGNC:16063]
ENSG00000078674.17	PCM1	protein_coding	pericentriolar material 1 [Source:HGNC Symbol;Acc:HGNC:8727]
ENSG00000078900.14	TP73	protein_coding	tumor protein p73 [Source:HGNC Symbol;Acc:HGNC:12003]
ENSG00000080503.22	SMARCA2	protein_coding	SWI/SNF related, matrix associated, actin dependent regulator of chromatin, subfamily a, member 2 [Source:HGNC Symbol;Acc:HGNC:11098]
ENSG00000081019.13	RSBN1	protein_coding	round spermatid basic protein 1 [Source:HGNC Symbol;Acc:HGNC:25642]
ENSG00000083720.12	OXCT1	protein_coding	3-oxoacid CoA-transferase 1 [Source:HGNC Symbol;Acc:HGNC:8527]
ENSG00000084090.13	STARD7	protein_coding	StAR related lipid transfer domain containing 7 [Source:HGNC Symbol;Acc:HGNC:18063]
ENSG00000085274.15	MYNN	protein_coding	myoneurin [Source:HGNC Symbol;Acc:HGNC:14955]
ENSG00000085276.17	MECOM	protein_coding	MDS1 and EVI1 complex locus [Source:HGNC Symbol;Acc:HGNC:3498]
ENSG00000085982.13	USP40	protein_coding	ubiquitin specific peptidase 40 [Source:HGNC Symbol;Acc:HGNC:20069]
ENSG00000088305.18	DNMT3B	protein_coding	DNA methyltransferase 3 beta [Source:HGNC Symbol;Acc:HGNC:2979]
ENSG00000089486.16	CDIP1	protein_coding	cell death inducing p53 target 1 [Source:HGNC Symbol;Acc:HGNC:13234]
ENSG00000089639.10	GMIP	protein_coding	GEM interacting protein [Source:HGNC Symbol;Acc:HGNC:24852]
ENSG00000089693.10	MLF2	protein_coding	myeloid leukemia factor 2 [Source:HGNC Symbol;Acc:HGNC:7126]
ENSG00000089737.16	DDX24	protein_coding	DEAD-box helicase 24 [Source:HGNC Symbol;Acc:HGNC:13266]
ENSG00000089818.17	NECAP1	protein_coding	NECAP endocytosis associated 1 [Source:HGNC Symbol;Acc:HGNC:24539]
ENSG00000090372.14	STRN4	protein_coding	striatin 4 [Source:HGNC Symbol;Acc:HGNC:15721]
ENSG00000090612.20	ZNF268	protein_coding	zinc finger protein 268 [Source:HGNC Symbol;Acc:HGNC:13061]
ENSG00000090857.13	PDPR	protein_coding	pyruvate dehydrogenase phosphatase regulatory subunit [Source:HGNC Symbol;Acc:HGNC:30264]
ENSG00000091073.19	DTX2	protein_coding	deltex E3 ubiquitin ligase 2 [Source:HGNC Symbol;Acc:HGNC:15973]
ENSG00000091490.10	SEL1L3	protein_coding	SEL1L family member 3 [Source:HGNC Symbol;Acc:HGNC:29108]
ENSG00000092203.13	TOX4	protein_coding	TOX high mobility group box family member 4 [Source:HGNC Symbol;Acc:HGNC:20161]
ENSG00000092208.16	GEMIN2	protein_coding	gem nuclear organelle associated protein 2 [Source:HGNC Symbol;Acc:HGNC:10884]
ENSG00000092421.16	SEMA6A	protein_coding	semaphorin 6A [Source:HGNC Symbol;Acc:HGNC:10738]
ENSG00000092439.13	TRPM7	protein_coding	transient receptor potential cation channel subfamily M member 7 [Source:HGNC Symbol;Acc:HGNC:17994]
ENSG00000092531.9	SNAP23	protein_coding	synaptosome associated protein 23 [Source:HGNC Symbol;Acc:HGNC:11131]
ENSG00000092929.11	UNC13D	protein_coding	unc-13 homolog D [Source:HGNC Symbol;Acc:HGNC:23147]
ENSG00000092931.11	MFSD11	protein_coding	major facilitator superfamily domain containing 11 [Source:HGNC Symbol;Acc:HGNC:25458]
ENSG00000093144.18	ECHDC1	protein_coding	ethylmalonyl-CoA decarboxylase 1 [Source:HGNC Symbol;Acc:HGNC:21489]
ENSG00000093167.17	LRRFIP2	protein_coding	LRR binding FLII interacting protein 2 [Source:HGNC Symbol;Acc:HGNC:6703]
ENSG00000095059.15	DHPS	protein_coding	deoxyhypusine synthase [Source:HGNC Symbol;Acc:HGNC:2869]
ENSG00000095066.11	HOOK2	protein_coding	hook microtubule tethering protein 2 [Source:HGNC Symbol;Acc:HGNC:19885]
ENSG00000095539.15	SEMA4G	protein_coding	semaphorin 4G [Source:HGNC Symbol;Acc:HGNC:10735]
ENSG00000095951.16	HIVEP1	protein_coding	human immunodeficiency virus type I enhancer binding protein 1 [Source:HGNC Symbol;Acc:HGNC:4920]
ENSG00000099849.14	RASSF7	protein_coding	Ras association domain family member 7 [Source:HGNC Symbol;Acc:HGNC:1166]
ENSG00000099917.17	MED15	protein_coding	mediator complex subunit 15 [Source:HGNC Symbol;Acc:HGNC:14248]
ENSG00000099949.18	LZTR1	protein_coding	leucine zipper like transcription regulator 1 [Source:HGNC Symbol;Acc:HGNC:6742]
ENSG00000100023.18	PPIL2	protein_coding	peptidylprolyl isomerase like 2 [Source:HGNC Symbol;Acc:HGNC:9261]
ENSG00000100109.16	TFIP11	protein_coding	tuftelin interacting protein 11 [Source:HGNC Symbol;Acc:HGNC:17165]
ENSG00000100246.12	DNAL4	protein_coding	dynein axonemal light chain 4 [Source:HGNC Symbol;Acc:HGNC:2955]
ENSG00000100266.18	PACSIN2	protein_coding	protein kinase C and casein kinase substrate in neurons 2 [Source:HGNC Symbol;Acc:HGNC:8571]
ENSG00000100335.13	MIEF1	protein_coding	mitochondrial elongation factor 1 [Source:HGNC Symbol;Acc:HGNC:25979]
ENSG00000100359.20	SGSM3	protein_coding	small G protein signaling modulator 3 [Source:HGNC Symbol;Acc:HGNC:25228]
ENSG00000100483.13	VCPKMT	protein_coding	valosin containing protein lysine methyltransferase [Source:HGNC Symbol;Acc:HGNC:20352]
ENSG00000100519.11	PSMC6	protein_coding	proteasome 26S subunit, ATPase 6 [Source:HGNC Symbol;Acc:HGNC:9553]
ENSG00000100578.14	KIAA0586	protein_coding	KIAA0586 [Source:HGNC Symbol;Acc:HGNC:19960]
ENSG00000100814.17	CCNB1IP1	protein_coding	cyclin B1 interacting protein 1 [Source:HGNC Symbol;Acc:HGNC:19437]
ENSG00000100890.15	KIAA0391	protein_coding	KIAA0391 [Source:HGNC Symbol;Acc:HGNC:19958]
ENSG00000101098.12	RIMS4	protein_coding	regulating synaptic membrane exocytosis 4 [Source:HGNC Symbol;Acc:HGNC:16183]
ENSG00000101115.12	SALL4	protein_coding	spalt like transcription factor 4 [Source:HGNC Symbol;Acc:HGNC:15924]
ENSG00000101187.15	SLCO4A1	protein_coding	solute carrier organic anion transporter family member 4A1 [Source:HGNC Symbol;Acc:HGNC:10953]
ENSG00000101236.16	RNF24	protein_coding	ring finger protein 24 [Source:HGNC Symbol;Acc:HGNC:13779]
ENSG00000101346.13	POFUT1	protein_coding	protein O-fucosyltransferase 1 [Source:HGNC Symbol;Acc:HGNC:14988]
ENSG00000101417.11	PXMP4	protein_coding	peroxisomal membrane protein 4 [Source:HGNC Symbol;Acc:HGNC:15920]
ENSG00000101557.14	USP14	protein_coding	ubiquitin specific peptidase 14 [Source:HGNC Symbol;Acc:HGNC:12612]
ENSG00000101639.18	CEP192	protein_coding	centrosomal protein 192 [Source:HGNC Symbol;Acc:HGNC:25515]
ENSG00000101654.17	RNMT	protein_coding	RNA guanine-7 methyltransferase [Source:HGNC Symbol;Acc:HGNC:10075]
ENSG00000102078.15	SLC25A14	protein_coding	solute carrier family 25 member 14 [Source:HGNC Symbol;Acc:HGNC:10984]
ENSG00000102100.15	SLC35A2	protein_coding	solute carrier family 35 member A2 [Source:HGNC Symbol;Acc:HGNC:11022]
ENSG00000102158.19	MAGT1	protein_coding	magnesium transporter 1 [Source:HGNC Symbol;Acc:HGNC:28880]
ENSG00000102786.14	INTS6	protein_coding	integrator complex subunit 6 [Source:HGNC Symbol;Acc:HGNC:14879]
ENSG00000102871.15	TRADD	protein_coding	TNFRSF1A associated via death domain [Source:HGNC Symbol;Acc:HGNC:12030]
ENSG00000102882.11	MAPK3	protein_coding	mitogen-activated protein kinase 3 [Source:HGNC Symbol;Acc:HGNC:6877]
ENSG00000103024.7	NME3	protein_coding	NME/NM23 nucleoside diphosphate kinase 3 [Source:HGNC Symbol;Acc:HGNC:7851]
ENSG00000103034.14	NDRG4	protein_coding	NDRG family member 4 [Source:HGNC Symbol;Acc:HGNC:14466]
ENSG00000103056.11	SMPD3	protein_coding	sphingomyelin phosphodiesterase 3 [Source:HGNC Symbol;Acc:HGNC:14240]
ENSG00000103089.8	FA2H	protein_coding	fatty acid 2-hydroxylase [Source:HGNC Symbol;Acc:HGNC:21197]
ENSG00000103168.16	TAF1C	protein_coding	TATA-box binding protein associated factor, RNA polymerase I subunit C [Source:HGNC Symbol;Acc:HGNC:11534]
ENSG00000103187.7	COTL1	protein_coding	coactosin like F-actin binding protein 1 [Source:HGNC Symbol;Acc:HGNC:18304]
ENSG00000103197.16	TSC2	protein_coding	tuberous sclerosis 2 [Source:HGNC Symbol;Acc:HGNC:12363]
ENSG00000103222.18	ABCC1	protein_coding	ATP binding cassette subfamily C member 1 [Source:HGNC Symbol;Acc:HGNC:51]
ENSG00000103227.18	LMF1	protein_coding	lipase maturation factor 1 [Source:HGNC Symbol;Acc:HGNC:14154]
ENSG00000103356.15	EARS2	protein_coding	glutamyl-tRNA synthetase 2, mitochondrial [Source:HGNC Symbol;Acc:HGNC:29419]
ENSG00000103423.13	DNAJA3	protein_coding	DnaJ heat shock protein family (Hsp40) member A3 [Source:HGNC Symbol;Acc:HGNC:11808]
ENSG00000103429.10	BFAR	protein_coding	bifunctional apoptosis regulator [Source:HGNC Symbol;Acc:HGNC:17613]
ENSG00000103512.14	NOMO1	protein_coding	NODAL modulator 1 [Source:HGNC Symbol;Acc:HGNC:30060]
ENSG00000103528.16	SYT17	protein_coding	synaptotagmin 17 [Source:HGNC Symbol;Acc:HGNC:24119]
ENSG00000103540.16	CCP110	protein_coding	centriolar coiled-coil protein 110 [Source:HGNC Symbol;Acc:HGNC:24342]
ENSG00000103995.13	CEP152	protein_coding	centrosomal protein 152 [Source:HGNC Symbol;Acc:HGNC:29298]
ENSG00000104064.16	GABPB1	protein_coding	GA binding protein transcription factor beta subunit 1 [Source:HGNC Symbol;Acc:HGNC:4074]
ENSG00000104081.13	BMF	protein_coding	Bcl2 modifying factor [Source:HGNC Symbol;Acc:HGNC:24132]
ENSG00000104205.12	SGK3	protein_coding	serum/glucocorticoid regulated kinase family member 3 [Source:HGNC Symbol;Acc:HGNC:10812]
ENSG00000104365.13	IKBKB	protein_coding	inhibitor of nuclear factor kappa B kinase subunit beta [Source:HGNC Symbol;Acc:HGNC:5960]
ENSG00000104490.17	NCALD	protein_coding	neurocalcin delta [Source:HGNC Symbol;Acc:HGNC:7655]
ENSG00000104517.12	UBR5	protein_coding	ubiquitin protein ligase E3 component n-recognin 5 [Source:HGNC Symbol;Acc:HGNC:16806]
ENSG00000104643.9	MTMR9	protein_coding	myotubularin related protein 9 [Source:HGNC Symbol;Acc:HGNC:14596]
ENSG00000104783.11	KCNN4	protein_coding	potassium calcium-activated channel subfamily N member 4 [Source:HGNC Symbol;Acc:HGNC:6293]
ENSG00000104812.14	GYS1	protein_coding	glycogen synthase 1 [Source:HGNC Symbol;Acc:HGNC:4706]
ENSG00000104825.16	NFKBIB	protein_coding	NFKB inhibitor beta [Source:HGNC Symbol;Acc:HGNC:7798]
ENSG00000105085.10	MED26	protein_coding	mediator complex subunit 26 [Source:HGNC Symbol;Acc:HGNC:2376]
ENSG00000105136.20	ZNF419	protein_coding	zinc finger protein 419 [Source:HGNC Symbol;Acc:HGNC:20648]
ENSG00000105173.13	CCNE1	protein_coding	cyclin E1 [Source:HGNC Symbol;Acc:HGNC:1589]
ENSG00000105287.12	PRKD2	protein_coding	protein kinase D2 [Source:HGNC Symbol;Acc:HGNC:17293]
ENSG00000105397.13	TYK2	protein_coding	tyrosine kinase 2 [Source:HGNC Symbol;Acc:HGNC:12440]
ENSG00000105443.14	CYTH2	protein_coding	cytohesin 2 [Source:HGNC Symbol;Acc:HGNC:9502]
ENSG00000105472.12	CLEC11A	protein_coding	C-type lectin domain containing 11A [Source:HGNC Symbol;Acc:HGNC:10576]
ENSG00000105656.12	ELL	protein_coding	elongation factor for RNA polymerase II [Source:HGNC Symbol;Acc:HGNC:23114]
ENSG00000105711.11	SCN1B	protein_coding	sodium voltage-gated channel beta subunit 1 [Source:HGNC Symbol;Acc:HGNC:10586]
ENSG00000105750.14	ZNF85	protein_coding	zinc finger protein 85 [Source:HGNC Symbol;Acc:HGNC:13160]
ENSG00000105755.7	ETHE1	protein_coding	ETHE1, persulfide dioxygenase [Source:HGNC Symbol;Acc:HGNC:23287]
ENSG00000105926.15	MPP6	protein_coding	membrane palmitoylated protein 6 [Source:HGNC Symbol;Acc:HGNC:18167]
ENSG00000106003.12	LFNG	protein_coding	LFNG O-fucosylpeptide 3-beta-N-acetylglucosaminyltransferase [Source:HGNC Symbol;Acc:HGNC:6560]
ENSG00000106133.17	NSUN5P2	transcribed_unprocessed_pseudogene	NOP2/Sun RNA methyltransferase family member 5 pseudogene 2 [Source:HGNC Symbol;Acc:HGNC:16609]
ENSG00000106144.19	CASP2	protein_coding	caspase 2 [Source:HGNC Symbol;Acc:HGNC:1503]
ENSG00000106290.14	TAF6	protein_coding	TATA-box binding protein associated factor 6 [Source:HGNC Symbol;Acc:HGNC:11540]
ENSG00000106330.11	MOSPD3	protein_coding	motile sperm domain containing 3 [Source:HGNC Symbol;Acc:HGNC:25078]
ENSG00000106603.18	COA1	protein_coding	cytochrome c oxidase assembly factor 1 homolog [Source:HGNC Symbol;Acc:HGNC:21868]
ENSG00000106683.14	LIMK1	protein_coding	LIM domain kinase 1 [Source:HGNC Symbol;Acc:HGNC:6613]
ENSG00000106868.16	SUSD1	protein_coding	sushi domain containing 1 [Source:HGNC Symbol;Acc:HGNC:25413]
ENSG00000107021.15	TBC1D13	protein_coding	TBC1 domain family member 13 [Source:HGNC Symbol;Acc:HGNC:25571]
ENSG00000107099.15	DOCK8	protein_coding	dedicator of cytokinesis 8 [Source:HGNC Symbol;Acc:HGNC:19191]
ENSG00000107263.18	RAPGEF1	protein_coding	Rap guanine nucleotide exchange factor 1 [Source:HGNC Symbol;Acc:HGNC:4568]
ENSG00000107372.12	ZFAND5	protein_coding	zinc finger AN1-type containing 5 [Source:HGNC Symbol;Acc:HGNC:13008]
ENSG00000107833.10	NPM3	protein_coding	nucleophosmin/nucleoplasmin 3 [Source:HGNC Symbol;Acc:HGNC:7931]
ENSG00000107902.13	LHPP	protein_coding	phospholysine phosphohistidine inorganic pyrophosphate phosphatase [Source:HGNC Symbol;Acc:HGNC:30042]
ENSG00000108239.8	TBC1D12	protein_coding	TBC1 domain family member 12 [Source:HGNC Symbol;Acc:HGNC:29082]
ENSG00000108578.14	BLMH	protein_coding	bleomycin hydrolase [Source:HGNC Symbol;Acc:HGNC:1059]
ENSG00000108587.15	GOSR1	protein_coding	golgi SNAP receptor complex member 1 [Source:HGNC Symbol;Acc:HGNC:4430]
ENSG00000108591.9	DRG2	protein_coding	developmentally regulated GTP binding protein 2 [Source:HGNC Symbol;Acc:HGNC:3030]
ENSG00000108691.9	CCL2	protein_coding	C-C motif chemokine ligand 2 [Source:HGNC Symbol;Acc:HGNC:10618]
ENSG00000108784.9	NAGLU	protein_coding	N-acetyl-alpha-glucosaminidase [Source:HGNC Symbol;Acc:HGNC:7632]
ENSG00000108852.14	MPP2	protein_coding	membrane palmitoylated protein 2 [Source:HGNC Symbol;Acc:HGNC:7220]
ENSG00000108963.17	DPH1	protein_coding	diphthamide biosynthesis 1 [Source:HGNC Symbol;Acc:HGNC:3003]
ENSG00000109320.11	NFKB1	protein_coding	nuclear factor kappa B subunit 1 [Source:HGNC Symbol;Acc:HGNC:7794]
ENSG00000109339.20	MAPK10	protein_coding	mitogen-activated protein kinase 10 [Source:HGNC Symbol;Acc:HGNC:6872]
ENSG00000109445.10	ZNF330	protein_coding	zinc finger protein 330 [Source:HGNC Symbol;Acc:HGNC:15462]
ENSG00000109501.13	WFS1	protein_coding	wolframin ER transmembrane glycoprotein [Source:HGNC Symbol;Acc:HGNC:12762]
ENSG00000109654.14	TRIM2	protein_coding	tripartite motif containing 2 [Source:HGNC Symbol;Acc:HGNC:15974]
ENSG00000109685.17	NSD2	protein_coding	nuclear receptor binding SET domain protein 2 [Source:HGNC Symbol;Acc:HGNC:12766]
ENSG00000109689.15	STIM2	protein_coding	stromal interaction molecule 2 [Source:HGNC Symbol;Acc:HGNC:19205]
ENSG00000109775.10	UFSP2	protein_coding	UFM1 specific peptidase 2 [Source:HGNC Symbol;Acc:HGNC:25640]
ENSG00000109790.16	KLHL5	protein_coding	kelch like family member 5 [Source:HGNC Symbol;Acc:HGNC:6356]
ENSG00000110075.14	PPP6R3	protein_coding	protein phosphatase 6 regulatory subunit 3 [Source:HGNC Symbol;Acc:HGNC:1173]
ENSG00000110108.9	TMEM109	protein_coding	transmembrane protein 109 [Source:HGNC Symbol;Acc:HGNC:28771]
ENSG00000110172.11	CHORDC1	protein_coding	cysteine and histidine rich domain containing 1 [Source:HGNC Symbol;Acc:HGNC:14525]
ENSG00000110218.8	PANX1	protein_coding	pannexin 1 [Source:HGNC Symbol;Acc:HGNC:8599]
ENSG00000110344.9	UBE4A	protein_coding	ubiquitination factor E4A [Source:HGNC Symbol;Acc:HGNC:12499]
ENSG00000110429.13	FBXO3	protein_coding	F-box protein 3 [Source:HGNC Symbol;Acc:HGNC:13582]
ENSG00000110583.12	NAA40	protein_coding	N(alpha)-acetyltransferase 40, NatD catalytic subunit [Source:HGNC Symbol;Acc:HGNC:25845]
ENSG00000110801.13	PSMD9	protein_coding	proteasome 26S subunit, non-ATPase 9 [Source:HGNC Symbol;Acc:HGNC:9567]
ENSG00000111325.16	OGFOD2	protein_coding	2-oxoglutarate and iron dependent oxygenase domain containing 2 [Source:HGNC Symbol;Acc:HGNC:25823]
ENSG00000111452.12	ADGRD1	protein_coding	adhesion G protein-coupled receptor D1 [Source:HGNC Symbol;Acc:HGNC:19893]
ENSG00000111665.11	CDCA3	protein_coding	cell division cycle associated 3 [Source:HGNC Symbol;Acc:HGNC:14624]
ENSG00000111678.10	C12orf57	protein_coding	chromosome 12 open reading frame 57 [Source:HGNC Symbol;Acc:HGNC:29521]
ENSG00000111727.11	HCFC2	protein_coding	host cell factor C2 [Source:HGNC Symbol;Acc:HGNC:24972]
ENSG00000112183.14	RBM24	protein_coding	RNA binding motif protein 24 [Source:HGNC Symbol;Acc:HGNC:21539]
ENSG00000112186.11	CAP2	protein_coding	cyclase associated actin cytoskeleton regulatory protein 2 [Source:HGNC Symbol;Acc:HGNC:20039]
ENSG00000112309.10	B3GAT2	protein_coding	beta-1,3-glucuronyltransferase 2 [Source:HGNC Symbol;Acc:HGNC:922]
ENSG00000112339.14	HBS1L	protein_coding	HBS1 like translational GTPase [Source:HGNC Symbol;Acc:HGNC:4834]
ENSG00000112511.17	PHF1	protein_coding	PHD finger protein 1 [Source:HGNC Symbol;Acc:HGNC:8919]
ENSG00000112584.13	FAM120B	protein_coding	family with sequence similarity 120B [Source:HGNC Symbol;Acc:HGNC:21109]
ENSG00000112812.15	PRSS16	protein_coding	protease, serine 16 [Source:HGNC Symbol;Acc:HGNC:9480]
ENSG00000113068.9	PFDN1	protein_coding	prefoldin subunit 1 [Source:HGNC Symbol;Acc:HGNC:8866]
ENSG00000113240.12	CLK4	protein_coding	CDC like kinase 4 [Source:HGNC Symbol;Acc:HGNC:13659]
ENSG00000113597.17	TRAPPC13	protein_coding	trafficking protein particle complex 13 [Source:HGNC Symbol;Acc:HGNC:25828]
ENSG00000113648.16	H2AFY	protein_coding	H2A histone family member Y [Source:HGNC Symbol;Acc:HGNC:4740]
ENSG00000113658.16	SMAD5	protein_coding	SMAD family member 5 [Source:HGNC Symbol;Acc:HGNC:6771]
ENSG00000113712.17	CSNK1A1	protein_coding	casein kinase 1 alpha 1 [Source:HGNC Symbol;Acc:HGNC:2451]
ENSG00000113810.15	SMC4	protein_coding	structural maintenance of chromosomes 4 [Source:HGNC Symbol;Acc:HGNC:14013]
ENSG00000113916.17	BCL6	protein_coding	B-cell CLL/lymphoma 6 [Source:HGNC Symbol;Acc:HGNC:1001]
ENSG00000114316.12	USP4	protein_coding	ubiquitin specific peptidase 4 [Source:HGNC Symbol;Acc:HGNC:12627]
ENSG00000114520.10	SNX4	protein_coding	sorting nexin 4 [Source:HGNC Symbol;Acc:HGNC:11175]
ENSG00000114737.15	CISH	protein_coding	cytokine inducible SH2 containing protein [Source:HGNC Symbol;Acc:HGNC:1984]
ENSG00000114857.17	NKTR	protein_coding	natural killer cell triggering receptor [Source:HGNC Symbol;Acc:HGNC:7833]
ENSG00000114859.15	CLCN2	protein_coding	chloride voltage-gated channel 2 [Source:HGNC Symbol;Acc:HGNC:2020]
ENSG00000115137.11	DNAJC27	protein_coding	DnaJ heat shock protein family (Hsp40) member C27 [Source:HGNC Symbol;Acc:HGNC:30290]
ENSG00000115159.15	GPD2	protein_coding	glycerol-3-phosphate dehydrogenase 2 [Source:HGNC Symbol;Acc:HGNC:4456]
ENSG00000115163.14	CENPA	protein_coding	centromere protein A [Source:HGNC Symbol;Acc:HGNC:1851]
ENSG00000115216.13	NRBP1	protein_coding	nuclear receptor binding protein 1 [Source:HGNC Symbol;Acc:HGNC:7993]
ENSG00000115221.10	ITGB6	protein_coding	integrin subunit beta 6 [Source:HGNC Symbol;Acc:HGNC:6161]
ENSG00000115233.11	PSMD14	protein_coding	proteasome 26S subunit, non-ATPase 14 [Source:HGNC Symbol;Acc:HGNC:16889]
ENSG00000115234.10	SNX17	protein_coding	sorting nexin 17 [Source:HGNC Symbol;Acc:HGNC:14979]
ENSG00000115504.14	EHBP1	protein_coding	EH domain binding protein 1 [Source:HGNC Symbol;Acc:HGNC:29144]
ENSG00000115648.13	MLPH	protein_coding	melanophilin [Source:HGNC Symbol;Acc:HGNC:29643]
ENSG00000115840.13	SLC25A12	protein_coding	solute carrier family 25 member 12 [Source:HGNC Symbol;Acc:HGNC:10982]
ENSG00000115866.10	DARS	protein_coding	aspartyl-tRNA synthetase [Source:HGNC Symbol;Acc:HGNC:2678]
ENSG00000115902.10	SLC1A4	protein_coding	solute carrier family 1 member 4 [Source:HGNC Symbol;Acc:HGNC:10942]
ENSG00000116299.16	KIAA1324	protein_coding	KIAA1324 [Source:HGNC Symbol;Acc:HGNC:29618]
ENSG00000116497.17	S100PBP	protein_coding	S100P binding protein [Source:HGNC Symbol;Acc:HGNC:25768]
ENSG00000116521.10	SCAMP3	protein_coding	secretory carrier membrane protein 3 [Source:HGNC Symbol;Acc:HGNC:10565]
ENSG00000116688.16	MFN2	protein_coding	mitofusin 2 [Source:HGNC Symbol;Acc:HGNC:16877]
ENSG00000116954.7	RRAGC	protein_coding	Ras related GTP binding C [Source:HGNC Symbol;Acc:HGNC:19902]
ENSG00000117009.11	KMO	protein_coding	kynurenine 3-monooxygenase [Source:HGNC Symbol;Acc:HGNC:6381]
ENSG00000117228.9	GBP1	protein_coding	guanylate binding protein 1 [Source:HGNC Symbol;Acc:HGNC:4182]
ENSG00000117262.18	GPR89A	protein_coding	G protein-coupled receptor 89A [Source:HGNC Symbol;Acc:HGNC:31984]
ENSG00000117500.12	TMED5	protein_coding	transmembrane p24 trafficking protein 5 [Source:HGNC Symbol;Acc:HGNC:24251]
ENSG00000117528.11	ABCD3	protein_coding	ATP binding cassette subfamily D member 3 [Source:HGNC Symbol;Acc:HGNC:67]
ENSG00000117676.13	RPS6KA1	protein_coding	ribosomal protein S6 kinase A1 [Source:HGNC Symbol;Acc:HGNC:10430]
ENSG00000117682.16	DHDDS	protein_coding	dehydrodolichyl diphosphate synthase subunit [Source:HGNC Symbol;Acc:HGNC:20603]
ENSG00000118007.12	STAG1	protein_coding	stromal antigen 1 [Source:HGNC Symbol;Acc:HGNC:11354]
ENSG00000118263.14	KLF7	protein_coding	Kruppel like factor 7 [Source:HGNC Symbol;Acc:HGNC:6350]
ENSG00000118596.11	SLC16A7	protein_coding	solute carrier family 16 member 7 [Source:HGNC Symbol;Acc:HGNC:10928]
ENSG00000118873.15	RAB3GAP2	protein_coding	RAB3 GTPase activating non-catalytic protein subunit 2 [Source:HGNC Symbol;Acc:HGNC:17168]
ENSG00000118961.14	LDAH	protein_coding	lipid droplet associated hydrolase [Source:HGNC Symbol;Acc:HGNC:26145]
ENSG00000119559.15	C19orf25	protein_coding	chromosome 19 open reading frame 25 [Source:HGNC Symbol;Acc:HGNC:26711]
ENSG00000119725.18	ZNF410	protein_coding	zinc finger protein 410 [Source:HGNC Symbol;Acc:HGNC:20144]
ENSG00000119777.18	TMEM214	protein_coding	transmembrane protein 214 [Source:HGNC Symbol;Acc:HGNC:25983]
ENSG00000119778.14	ATAD2B	protein_coding	ATPase family, AAA domain containing 2B [Source:HGNC Symbol;Acc:HGNC:29230]
ENSG00000119787.13	ATL2	protein_coding	atlastin GTPase 2 [Source:HGNC Symbol;Acc:HGNC:24047]
ENSG00000120093.11	HOXB3	protein_coding	homeobox B3 [Source:HGNC Symbol;Acc:HGNC:5114]
ENSG00000120690.15	ELF1	protein_coding	E74 like ETS transcription factor 1 [Source:HGNC Symbol;Acc:HGNC:3316]
ENSG00000120756.12	PLS1	protein_coding	plastin 1 [Source:HGNC Symbol;Acc:HGNC:9090]
ENSG00000120833.13	SOCS2	protein_coding	suppressor of cytokine signaling 2 [Source:HGNC Symbol;Acc:HGNC:19382]
ENSG00000121481.10	RNF2	protein_coding	ring finger protein 2 [Source:HGNC Symbol;Acc:HGNC:10061]
ENSG00000121671.11	CRY2	protein_coding	cryptochrome circadian clock 2 [Source:HGNC Symbol;Acc:HGNC:2385]
ENSG00000121989.14	ACVR2A	protein_coding	activin A receptor type 2A [Source:HGNC Symbol;Acc:HGNC:173]
ENSG00000122085.16	MTERF4	protein_coding	mitochondrial transcription termination factor 4 [Source:HGNC Symbol;Acc:HGNC:28785]
ENSG00000122203.14	KIAA1191	protein_coding	KIAA1191 [Source:HGNC Symbol;Acc:HGNC:29209]
ENSG00000122641.10	INHBA	protein_coding	inhibin beta A subunit [Source:HGNC Symbol;Acc:HGNC:6066]
ENSG00000122970.15	IFT81	protein_coding	intraflagellar transport 81 [Source:HGNC Symbol;Acc:HGNC:14313]
ENSG00000123080.10	CDKN2C	protein_coding	cyclin dependent kinase inhibitor 2C [Source:HGNC Symbol;Acc:HGNC:1789]
ENSG00000123191.14	ATP7B	protein_coding	ATPase copper transporting beta [Source:HGNC Symbol;Acc:HGNC:870]
ENSG00000123342.15	MMP19	protein_coding	matrix metallopeptidase 19 [Source:HGNC Symbol;Acc:HGNC:7165]
ENSG00000123349.13	PFDN5	protein_coding	prefoldin subunit 5 [Source:HGNC Symbol;Acc:HGNC:8869]
ENSG00000123411.14	IKZF4	protein_coding	IKAROS family zinc finger 4 [Source:HGNC Symbol;Acc:HGNC:13179]
ENSG00000123473.15	STIL	protein_coding	STIL, centriolar assembly protein [Source:HGNC Symbol;Acc:HGNC:10879]
ENSG00000123739.10	PLA2G12A	protein_coding	phospholipase A2 group XIIA [Source:HGNC Symbol;Acc:HGNC:18554]
ENSG00000123836.14	PFKFB2	protein_coding	6-phosphofructo-2-kinase/fructose-2,6-biphosphatase 2 [Source:HGNC Symbol;Acc:HGNC:8873]
ENSG00000124104.18	SNX21	protein_coding	sorting nexin family member 21 [Source:HGNC Symbol;Acc:HGNC:16154]
ENSG00000124155.17	PIGT	protein_coding	phosphatidylinositol glycan anchor biosynthesis class T [Source:HGNC Symbol;Acc:HGNC:14938]
ENSG00000124222.22	STX16	protein_coding	syntaxin 16 [Source:HGNC Symbol;Acc:HGNC:11431]
ENSG00000124743.5	KLHL31	protein_coding	kelch like family member 31 [Source:HGNC Symbol;Acc:HGNC:21353]
ENSG00000125247.15	TMTC4	protein_coding	transmembrane and tetratricopeptide repeat containing 4 [Source:HGNC Symbol;Acc:HGNC:25904]
ENSG00000125445.10	MRPS7	protein_coding	mitochondrial ribosomal protein S7 [Source:HGNC Symbol;Acc:HGNC:14499]
ENSG00000125637.15	PSD4	protein_coding	pleckstrin and Sec7 domain containing 4 [Source:HGNC Symbol;Acc:HGNC:19096]
ENSG00000125755.18	SYMPK	protein_coding	symplekin [Source:HGNC Symbol;Acc:HGNC:22935]
ENSG00000125844.15	RRBP1	protein_coding	ribosome binding protein 1 [Source:HGNC Symbol;Acc:HGNC:10448]
ENSG00000125912.10	NCLN	protein_coding	nicalin [Source:HGNC Symbol;Acc:HGNC:26923]
ENSG00000126453.9	BCL2L12	protein_coding	BCL2 like 12 [Source:HGNC Symbol;Acc:HGNC:13787]
ENSG00000126883.16	NUP214	protein_coding	nucleoporin 214 [Source:HGNC Symbol;Acc:HGNC:8064]
ENSG00000126934.13	MAP2K2	protein_coding	mitogen-activated protein kinase kinase 2 [Source:HGNC Symbol;Acc:HGNC:6842]
ENSG00000127054.20	INTS11	protein_coding	integrator complex subunit 11 [Source:HGNC Symbol;Acc:HGNC:26052]
ENSG00000127452.8	FBXL12	protein_coding	F-box and leucine rich repeat protein 12 [Source:HGNC Symbol;Acc:HGNC:13611]
ENSG00000127511.9	SIN3B	protein_coding	SIN3 transcription regulator family member B [Source:HGNC Symbol;Acc:HGNC:19354]
ENSG00000127946.16	HIP1	protein_coding	huntingtin interacting protein 1 [Source:HGNC Symbol;Acc:HGNC:4913]
ENSG00000127980.15	PEX1	protein_coding	peroxisomal biogenesis factor 1 [Source:HGNC Symbol;Acc:HGNC:8850]
ENSG00000128271.21	ADORA2A	protein_coding	adenosine A2a receptor [Source:HGNC Symbol;Acc:HGNC:263]
ENSG00000128309.16	MPST	protein_coding	mercaptopyruvate sulfurtransferase [Source:HGNC Symbol;Acc:HGNC:7223]
ENSG00000128573.24	FOXP2	protein_coding	forkhead box P2 [Source:HGNC Symbol;Acc:HGNC:13875]
ENSG00000128595.16	CALU	protein_coding	calumenin [Source:HGNC Symbol;Acc:HGNC:1458]
ENSG00000128973.12	CLN6	protein_coding	CLN6, transmembrane ER protein [Source:HGNC Symbol;Acc:HGNC:2077]
ENSG00000129235.10	TXNDC17	protein_coding	thioredoxin domain containing 17 [Source:HGNC Symbol;Acc:HGNC:28218]
ENSG00000129521.13	EGLN3	protein_coding	egl-9 family hypoxia inducible factor 3 [Source:HGNC Symbol;Acc:HGNC:14661]
ENSG00000129535.12	NRL	protein_coding	neural retina leucine zipper [Source:HGNC Symbol;Acc:HGNC:8002]
ENSG00000129682.15	FGF13	protein_coding	fibroblast growth factor 13 [Source:HGNC Symbol;Acc:HGNC:3670]
ENSG00000130299.16	GTPBP3	protein_coding	GTP binding protein 3 (mitochondrial) [Source:HGNC Symbol;Acc:HGNC:14880]
ENSG00000130304.16	SLC27A1	protein_coding	solute carrier family 27 member 1 [Source:HGNC Symbol;Acc:HGNC:10995]
ENSG00000130305.16	NSUN5	protein_coding	NOP2/Sun RNA methyltransferase family member 5 [Source:HGNC Symbol;Acc:HGNC:16385]
ENSG00000130517.13	PGPEP1	protein_coding	pyroglutamyl-peptidase I [Source:HGNC Symbol;Acc:HGNC:13568]
ENSG00000130559.18	CAMSAP1	protein_coding	calmodulin regulated spectrin associated protein 1 [Source:HGNC Symbol;Acc:HGNC:19946]
ENSG00000130702.15	LAMA5	protein_coding	laminin subunit alpha 5 [Source:HGNC Symbol;Acc:HGNC:6485]
ENSG00000131051.22	RBM39	protein_coding	RNA binding motif protein 39 [Source:HGNC Symbol;Acc:HGNC:15923]
ENSG00000131269.15	ABCB7	protein_coding	ATP binding cassette subfamily B member 7 [Source:HGNC Symbol;Acc:HGNC:48]
ENSG00000131732.11	ZCCHC9	protein_coding	zinc finger CCHC-type containing 9 [Source:HGNC Symbol;Acc:HGNC:25424]
ENSG00000131943.17	C19orf12	protein_coding	chromosome 19 open reading frame 12 [Source:HGNC Symbol;Acc:HGNC:25443]
ENSG00000131981.15	LGALS3	protein_coding	galectin 3 [Source:HGNC Symbol;Acc:HGNC:6563]
ENSG00000132256.18	TRIM5	protein_coding	tripartite motif containing 5 [Source:HGNC Symbol;Acc:HGNC:16276]
ENSG00000132356.11	PRKAA1	protein_coding	protein kinase AMP-activated catalytic subunit alpha 1 [Source:HGNC Symbol;Acc:HGNC:9376]
ENSG00000132470.13	ITGB4	protein_coding	integrin subunit beta 4 [Source:HGNC Symbol;Acc:HGNC:6158]
ENSG00000132530.16	XAF1	protein_coding	XIAP associated factor 1 [Source:HGNC Symbol;Acc:HGNC:30932]
ENSG00000132563.15	REEP2	protein_coding	receptor accessory protein 2 [Source:HGNC Symbol;Acc:HGNC:17975]
ENSG00000132677.12	RHBG	protein_coding	Rh family B glycoprotein (gene/pseudogene) [Source:HGNC Symbol;Acc:HGNC:14572]
ENSG00000132716.18	DCAF8	protein_coding	DDB1 and CUL4 associated factor 8 [Source:HGNC Symbol;Acc:HGNC:24891]
ENSG00000132780.16	NASP	protein_coding	nuclear autoantigenic sperm protein [Source:HGNC Symbol;Acc:HGNC:7644]
ENSG00000133134.11	BEX2	protein_coding	brain expressed X-linked 2 [Source:HGNC Symbol;Acc:HGNC:30933]
ENSG00000133142.17	TCEAL4	protein_coding	transcription elongation factor A like 4 [Source:HGNC Symbol;Acc:HGNC:26121]
ENSG00000133398.3	MED10	protein_coding	mediator complex subunit 10 [Source:HGNC Symbol;Acc:HGNC:28760]
ENSG00000133805.15	AMPD3	protein_coding	adenosine monophosphate deaminase 3 [Source:HGNC Symbol;Acc:HGNC:470]
ENSG00000133812.15	SBF2	protein_coding	SET binding factor 2 [Source:HGNC Symbol;Acc:HGNC:2135]
ENSG00000133818.13	RRAS2	protein_coding	related RAS viral (r-ras) oncogene homolog 2 [Source:HGNC Symbol;Acc:HGNC:17271]
ENSG00000133961.19	NUMB	protein_coding	NUMB, endocytic adaptor protein [Source:HGNC Symbol;Acc:HGNC:8060]
ENSG00000134248.13	LAMTOR5	protein_coding	late endosomal/lysosomal adaptor, MAPK and MTOR activator 5 [Source:HGNC Symbol;Acc:HGNC:17955]
ENSG00000134255.13	CEPT1	protein_coding	choline/ethanolamine phosphotransferase 1 [Source:HGNC Symbol;Acc:HGNC:24289]
ENSG00000134283.17	PPHLN1	protein_coding	periphilin 1 [Source:HGNC Symbol;Acc:HGNC:19369]
ENSG00000134533.6	RERG	protein_coding	RAS like estrogen regulated growth inhibitor [Source:HGNC Symbol;Acc:HGNC:15980]
ENSG00000134602.15	STK26	protein_coding	serine/threonine kinase 26 [Source:HGNC Symbol;Acc:HGNC:18174]
ENSG00000134709.10	HOOK1	protein_coding	hook microtubule tethering protein 1 [Source:HGNC Symbol;Acc:HGNC:19884]
ENSG00000134824.13	FADS2	protein_coding	fatty acid desaturase 2 [Source:HGNC Symbol;Acc:HGNC:3575]
ENSG00000134852.14	CLOCK	protein_coding	clock circadian regulator [Source:HGNC Symbol;Acc:HGNC:2082]
ENSG00000134864.10	GGACT	protein_coding	gamma-glutamylamine cyclotransferase [Source:HGNC Symbol;Acc:HGNC:25100]
ENSG00000134882.15	UBAC2	protein_coding	UBA domain containing 2 [Source:HGNC Symbol;Acc:HGNC:20486]
ENSG00000135090.13	TAOK3	protein_coding	TAO kinase 3 [Source:HGNC Symbol;Acc:HGNC:18133]
ENSG00000135297.15	MTO1	protein_coding	mitochondrial tRNA translation optimization 1 [Source:HGNC Symbol;Acc:HGNC:19261]
ENSG00000135454.13	B4GALNT1	protein_coding	beta-1,4-N-acetyl-galactosaminyltransferase 1 [Source:HGNC Symbol;Acc:HGNC:4117]
ENSG00000135541.20	AHI1	protein_coding	Abelson helper integration site 1 [Source:HGNC Symbol;Acc:HGNC:21575]
ENSG00000135622.12	SEMA4F	protein_coding	ssemaphorin 4F [Source:HGNC Symbol;Acc:HGNC:10734]
ENSG00000135709.12	KIAA0513	protein_coding	KIAA0513 [Source:HGNC Symbol;Acc:HGNC:29058]
ENSG00000135778.11	NTPCR	protein_coding	nucleoside-triphosphatase, cancer-related [Source:HGNC Symbol;Acc:HGNC:28204]
ENSG00000135912.10	TTLL4	protein_coding	tubulin tyrosine ligase like 4 [Source:HGNC Symbol;Acc:HGNC:28976]
ENSG00000135913.10	USP37	protein_coding	ubiquitin specific peptidase 37 [Source:HGNC Symbol;Acc:HGNC:20063]
ENSG00000136143.14	SUCLA2	protein_coding	succinate-CoA ligase ADP-forming beta subunit [Source:HGNC Symbol;Acc:HGNC:11448]
ENSG00000136631.12	VPS45	protein_coding	vacuolar protein sorting 45 homolog [Source:HGNC Symbol;Acc:HGNC:14579]
ENSG00000136802.11	LRRC8A	protein_coding	leucine rich repeat containing 8 family member A [Source:HGNC Symbol;Acc:HGNC:19027]
ENSG00000137074.18	APTX	protein_coding	aprataxin [Source:HGNC Symbol;Acc:HGNC:15984]
ENSG00000137075.17	RNF38	protein_coding	ring finger protein 38 [Source:HGNC Symbol;Acc:HGNC:18052]
ENSG00000137133.10	HINT2	protein_coding	histidine triad nucleotide binding protein 2 [Source:HGNC Symbol;Acc:HGNC:18344]
ENSG00000137207.11	YIPF3	protein_coding	Yip1 domain family member 3 [Source:HGNC Symbol;Acc:HGNC:21023]
ENSG00000137449.15	CPEB2	protein_coding	cytoplasmic polyadenylation element binding protein 2 [Source:HGNC Symbol;Acc:HGNC:21745]
ENSG00000137573.13	SULF1	protein_coding	sulfatase 1 [Source:HGNC Symbol;Acc:HGNC:20391]
ENSG00000137760.14	ALKBH8	protein_coding	alkB homolog 8, tRNA methyltransferase [Source:HGNC Symbol;Acc:HGNC:25189]
ENSG00000137942.16	FNBP1L	protein_coding	formin binding protein 1 like [Source:HGNC Symbol;Acc:HGNC:20851]
ENSG00000138030.12	KHK	protein_coding	ketohexokinase [Source:HGNC Symbol;Acc:HGNC:6315]
ENSG00000138413.13	IDH1	protein_coding	isocitrate dehydrogenase (NADP(+)) 1, cytosolic [Source:HGNC Symbol;Acc:HGNC:5382]
ENSG00000138430.15	OLA1	protein_coding	Obg like ATPase 1 [Source:HGNC Symbol;Acc:HGNC:28833]
ENSG00000138496.16	PARP9	protein_coding	poly(ADP-ribose) polymerase family member 9 [Source:HGNC Symbol;Acc:HGNC:24118]
ENSG00000138613.13	APH1B	protein_coding	aph-1 homolog B, gamma-secretase subunit [Source:HGNC Symbol;Acc:HGNC:24080]
ENSG00000138670.17	RASGEF1B	protein_coding	RasGEF domain family member 1B [Source:HGNC Symbol;Acc:HGNC:24881]
ENSG00000138750.14	NUP54	protein_coding	nucleoporin 54 [Source:HGNC Symbol;Acc:HGNC:17359]
ENSG00000138794.9	CASP6	protein_coding	caspase 6 [Source:HGNC Symbol;Acc:HGNC:1507]
ENSG00000138796.16	HADH	protein_coding	hydroxyacyl-CoA dehydrogenase [Source:HGNC Symbol;Acc:HGNC:4799]
ENSG00000138798.11	EGF	protein_coding	epidermal growth factor [Source:HGNC Symbol;Acc:HGNC:3229]
ENSG00000138835.22	RGS3	protein_coding	regulator of G protein signaling 3 [Source:HGNC Symbol;Acc:HGNC:9999]
ENSG00000139160.13	ETFBKMT	protein_coding	electron transfer flavoprotein beta subunit lysine methyltransferase [Source:HGNC Symbol;Acc:HGNC:28739]
ENSG00000139318.7	DUSP6	protein_coding	dual specificity phosphatase 6 [Source:HGNC Symbol;Acc:HGNC:3072]
ENSG00000139323.13	POC1B	protein_coding	POC1 centriolar protein B [Source:HGNC Symbol;Acc:HGNC:30836]
ENSG00000139370.11	SLC15A4	protein_coding	solute carrier family 15 member 4 [Source:HGNC Symbol;Acc:HGNC:23090]
ENSG00000139531.12	SUOX	protein_coding	sulfite oxidase [Source:HGNC Symbol;Acc:HGNC:11460]
ENSG00000139679.15	LPAR6	protein_coding	lysophosphatidic acid receptor 6 [Source:HGNC Symbol;Acc:HGNC:15520]
ENSG00000139793.18	MBNL2	protein_coding	muscleblind like splicing regulator 2 [Source:HGNC Symbol;Acc:HGNC:16746]
ENSG00000139926.15	FRMD6	protein_coding	FERM domain containing 6 [Source:HGNC Symbol;Acc:HGNC:19839]
ENSG00000140299.11	BNIP2	protein_coding	BCL2 interacting protein 2 [Source:HGNC Symbol;Acc:HGNC:1083]
ENSG00000140332.15	TLE3	protein_coding	transducin like enhancer of split 3 [Source:HGNC Symbol;Acc:HGNC:11839]
ENSG00000140403.12	DNAJA4	protein_coding	DnaJ heat shock protein family (Hsp40) member A4 [Source:HGNC Symbol;Acc:HGNC:14885]
ENSG00000140416.19	TPM1	protein_coding	tropomyosin 1 [Source:HGNC Symbol;Acc:HGNC:12010]
ENSG00000140455.16	USP3	protein_coding	ubiquitin specific peptidase 3 [Source:HGNC Symbol;Acc:HGNC:12626]
ENSG00000140848.16	CPNE2	protein_coding	copine 2 [Source:HGNC Symbol;Acc:HGNC:2315]
ENSG00000140992.18	PDPK1	protein_coding	3-phosphoinositide dependent protein kinase 1 [Source:HGNC Symbol;Acc:HGNC:8816]
ENSG00000140995.16	DEF8	protein_coding	differentially expressed in FDCP 8 homolog [Source:HGNC Symbol;Acc:HGNC:25969]
ENSG00000141258.12	SGSM2	protein_coding	small G protein signaling modulator 2 [Source:HGNC Symbol;Acc:HGNC:29026]
ENSG00000141428.16	C18orf21	protein_coding	chromosome 18 open reading frame 21 [Source:HGNC Symbol;Acc:HGNC:28802]
ENSG00000141448.8	GATA6	protein_coding	GATA binding protein 6 [Source:HGNC Symbol;Acc:HGNC:4174]
ENSG00000141551.14	CSNK1D	protein_coding	casein kinase 1 delta [Source:HGNC Symbol;Acc:HGNC:2452]
ENSG00000141568.20	FOXK2	protein_coding	forkhead box K2 [Source:HGNC Symbol;Acc:HGNC:6036]
ENSG00000141622.13	RNF165	protein_coding	ring finger protein 165 [Source:HGNC Symbol;Acc:HGNC:31696]
ENSG00000141905.18	NFIC	protein_coding	nuclear factor I C [Source:HGNC Symbol;Acc:HGNC:7786]
ENSG00000142794.18	NBPF3	protein_coding	NBPF member 3 [Source:HGNC Symbol;Acc:HGNC:25076]
ENSG00000142949.16	PTPRF	protein_coding	protein tyrosine phosphatase, receptor type F [Source:HGNC Symbol;Acc:HGNC:9670]
ENSG00000143179.14	UCK2	protein_coding	uridine-cytidine kinase 2 [Source:HGNC Symbol;Acc:HGNC:12562]
ENSG00000143258.15	USP21	protein_coding	ubiquitin specific peptidase 21 [Source:HGNC Symbol;Acc:HGNC:12620]
ENSG00000143401.14	ANP32E	protein_coding	acidic nuclear phosphoprotein 32 family member E [Source:HGNC Symbol;Acc:HGNC:16673]
ENSG00000143409.15	MINDY1	protein_coding	MINDY lysine 48 deubiquitinase 1 [Source:HGNC Symbol;Acc:HGNC:25648]
ENSG00000143494.15	VASH2	protein_coding	vasohibin 2 [Source:HGNC Symbol;Acc:HGNC:25723]
ENSG00000143514.16	TP53BP2	protein_coding	tumor protein p53 binding protein 2 [Source:HGNC Symbol;Acc:HGNC:12000]
ENSG00000143515.16	ATP8B2	protein_coding	ATPase phospholipid transporting 8B2 [Source:HGNC Symbol;Acc:HGNC:13534]
ENSG00000143569.18	UBAP2L	protein_coding	ubiquitin associated protein 2 like [Source:HGNC Symbol;Acc:HGNC:29877]
ENSG00000143815.14	LBR	protein_coding	lamin B receptor [Source:HGNC Symbol;Acc:HGNC:6518]
ENSG00000143870.12	PDIA6	protein_coding	protein disulfide isomerase family A member 6 [Source:HGNC Symbol;Acc:HGNC:30168]
ENSG00000144182.16	LIPT1	protein_coding	lipoyltransferase 1 [Source:HGNC Symbol;Acc:HGNC:29569]
ENSG00000144401.14	METTL21A	protein_coding	methyltransferase like 21A [Source:HGNC Symbol;Acc:HGNC:30476]
ENSG00000144485.10	HES6	protein_coding	hes family bHLH transcription factor 6 [Source:HGNC Symbol;Acc:HGNC:18254]
ENSG00000144674.16	GOLGA4	protein_coding	golgin A4 [Source:HGNC Symbol;Acc:HGNC:4427]
ENSG00000144736.13	SHQ1	protein_coding	SHQ1, H/ACA ribonucleoprotein assembly factor [Source:HGNC Symbol;Acc:HGNC:25543]
ENSG00000144843.11	ADPRH	protein_coding	ADP-ribosylarginine hydrolase [Source:HGNC Symbol;Acc:HGNC:269]
ENSG00000145332.13	KLHL8	protein_coding	kelch like family member 8 [Source:HGNC Symbol;Acc:HGNC:18644]
ENSG00000145348.16	TBCK	protein_coding	TBC1 domain containing kinase [Source:HGNC Symbol;Acc:HGNC:28261]
ENSG00000145819.15	ARHGAP26	protein_coding	Rho GTPase activating protein 26 [Source:HGNC Symbol;Acc:HGNC:17073]
ENSG00000145860.11	RNF145	protein_coding	ring finger protein 145 [Source:HGNC Symbol;Acc:HGNC:20853]
ENSG00000145912.8	NHP2	protein_coding	NHP2 ribonucleoprotein [Source:HGNC Symbol;Acc:HGNC:14377]
ENSG00000145916.18	RMND5B	protein_coding	required for meiotic nuclear division 5 homolog B [Source:HGNC Symbol;Acc:HGNC:26181]
ENSG00000146063.19	TRIM41	protein_coding	tripartite motif containing 41 [Source:HGNC Symbol;Acc:HGNC:19013]
ENSG00000146083.11	RNF44	protein_coding	ring finger protein 44 [Source:HGNC Symbol;Acc:HGNC:19180]
ENSG00000146267.11	FAXC	protein_coding	failed axon connections homolog [Source:HGNC Symbol;Acc:HGNC:20742]
ENSG00000147274.14	RBMX	protein_coding	RNA binding motif protein, X-linked [Source:HGNC Symbol;Acc:HGNC:9910]
ENSG00000147526.19	TACC1	protein_coding	transforming acidic coiled-coil containing protein 1 [Source:HGNC Symbol;Acc:HGNC:11522]
ENSG00000147548.16	NSD3	protein_coding	nuclear receptor binding SET domain protein 3 [Source:HGNC Symbol;Acc:HGNC:12767]
ENSG00000147689.16	FAM83A	protein_coding	family with sequence similarity 83 member A [Source:HGNC Symbol;Acc:HGNC:28210]
ENSG00000147905.17	ZCCHC7	protein_coding	zinc finger CCHC-type containing 7 [Source:HGNC Symbol;Acc:HGNC:26209]
ENSG00000147955.16	SIGMAR1	protein_coding	sigma non-opioid intracellular receptor 1 [Source:HGNC Symbol;Acc:HGNC:8157]
ENSG00000147996.16	CBWD5	protein_coding	COBW domain containing 5 [Source:HGNC Symbol;Acc:HGNC:24584]
ENSG00000148057.15	IDNK	protein_coding	IDNK, gluconokinase [Source:HGNC Symbol;Acc:HGNC:31367]
ENSG00000148225.15	WDR31	protein_coding	WD repeat domain 31 [Source:HGNC Symbol;Acc:HGNC:21421]
ENSG00000148737.16	TCF7L2	protein_coding	transcription factor 7 like 2 [Source:HGNC Symbol;Acc:HGNC:11641]
ENSG00000149289.10	ZC3H12C	protein_coding	zinc finger CCCH-type containing 12C [Source:HGNC Symbol;Acc:HGNC:29362]
ENSG00000149489.8	ROM1	protein_coding	retinal outer segment membrane protein 1 [Source:HGNC Symbol;Acc:HGNC:10254]
ENSG00000149554.12	CHEK1	protein_coding	checkpoint kinase 1 [Source:HGNC Symbol;Acc:HGNC:1925]
ENSG00000150054.18	MPP7	protein_coding	membrane palmitoylated protein 7 [Source:HGNC Symbol;Acc:HGNC:26542]
ENSG00000150337.13	FCGR1A	protein_coding	Fc fragment of IgG receptor Ia [Source:HGNC Symbol;Acc:HGNC:3613]
ENSG00000150627.15	WDR17	protein_coding	WD repeat domain 17 [Source:HGNC Symbol;Acc:HGNC:16661]
ENSG00000150760.12	DOCK1	protein_coding	dedicator of cytokinesis 1 [Source:HGNC Symbol;Acc:HGNC:2987]
ENSG00000150764.13	DIXDC1	protein_coding	DIX domain containing 1 [Source:HGNC Symbol;Acc:HGNC:23695]
ENSG00000150961.14	SEC24D	protein_coding	SEC24 homolog D, COPII coat complex component [Source:HGNC Symbol;Acc:HGNC:10706]
ENSG00000150990.7	DHX37	protein_coding	DEAH-box helicase 37 [Source:HGNC Symbol;Acc:HGNC:17210]
ENSG00000150995.18	ITPR1	protein_coding	inositol 1,4,5-trisphosphate receptor type 1 [Source:HGNC Symbol;Acc:HGNC:6180]
ENSG00000151090.17	THRB	protein_coding	thyroid hormone receptor beta [Source:HGNC Symbol;Acc:HGNC:11799]
ENSG00000151239.13	TWF1	protein_coding	twinfilin actin binding protein 1 [Source:HGNC Symbol;Acc:HGNC:9620]
ENSG00000151353.14	TMEM18	protein_coding	transmembrane protein 18 [Source:HGNC Symbol;Acc:HGNC:25257]
ENSG00000151366.12	NDUFC2	protein_coding	NADH:ubiquinone oxidoreductase subunit C2 [Source:HGNC Symbol;Acc:HGNC:7706]
ENSG00000151388.10	ADAMTS12	protein_coding	ADAM metallopeptidase with thrombospondin type 1 motif 12 [Source:HGNC Symbol;Acc:HGNC:14605]
ENSG00000151458.11	ANKRD50	protein_coding	ankyrin repeat domain 50 [Source:HGNC Symbol;Acc:HGNC:29223]
ENSG00000151503.12	NCAPD3	protein_coding	non-SMC condensin II complex subunit D3 [Source:HGNC Symbol;Acc:HGNC:28952]
ENSG00000151552.11	QDPR	protein_coding	quinoid dihydropteridine reductase [Source:HGNC Symbol;Acc:HGNC:9752]
ENSG00000151612.15	ZNF827	protein_coding	zinc finger protein 827 [Source:HGNC Symbol;Acc:HGNC:27193]
ENSG00000151923.17	TIAL1	protein_coding	TIA1 cytotoxic granule associated RNA binding protein like 1 [Source:HGNC Symbol;Acc:HGNC:11804]
ENSG00000152377.13	SPOCK1	protein_coding	SPARC/osteonectin, cwcv and kazal like domains proteoglycan 1 [Source:HGNC Symbol;Acc:HGNC:11251]
ENSG00000152380.9	FAM151B	protein_coding	family with sequence similarity 151 member B [Source:HGNC Symbol;Acc:HGNC:33716]
ENSG00000152404.15	CWF19L2	protein_coding	CWF19 like 2, cell cycle control (S. pombe) [Source:HGNC Symbol;Acc:HGNC:26508]
ENSG00000152527.13	PLEKHH2	protein_coding	pleckstrin homology, MyTH4 and FERM domain containing H2 [Source:HGNC Symbol;Acc:HGNC:30506]
ENSG00000152620.12	NADK2	protein_coding	NAD kinase 2, mitochondrial [Source:HGNC Symbol;Acc:HGNC:26404]
ENSG00000152683.14	SLC30A6	protein_coding	solute carrier family 30 member 6 [Source:HGNC Symbol;Acc:HGNC:19305]
[truncated: 364 more rows]

## Sheet: SE_genes
Gene stable ID version	Gene name	Gene type	Gene description
[truncated: 114 more rows]

[truncated: 6 more sheets: aTSS_genes, A5SS_genes, A3SS_genes, AF_genes, AL_genes, RI_genes]
