# Supplementary material
Source: Preprints.org preprint supplement (doi:10.20944/preprints202004.0323.v1)
Supplement: Supplementary file 1 [file supplementary › Supplementary_Table_10_GO_enrichment_analysis_spliced_genes.xlsx]

## Sheet: Annotation
Input ID	Gene ID	Type	Tax ID	Homologene Gene ID	Homologene Gene Tax ID	GO:0034470 ncRNA processing	GO:0043414 macromolecule methylation	GO:0097711 ciliary basal body-plasma memb	GO:0006732 coenzyme metabolic process	GO:0010564 regulation of cell cycle proce	GO:0051640 organelle localization	GO:0051345 positive regulation of hydrola	GO:0002244 hematopoietic progenitor cell	GO:0008380 RNA splicing	GO:0008610 lipid biosynthetic process	GO:0071539 protein localization to centro	GO:0031023 microtubule organizing center	GO:0006520 cellular amino acid metabolic	GO:0043161 proteasome-mediated ubiquitin-	GO:0000959 mitochondrial RNA metabolic pr	GO:0001510 RNA methylation	GO:0006914 autophagy	GO:0030029 actin filament-based process	GO:0007005 mitochondrion organization	GO:0034497 protein localization to phagop
NIPAL3	57185	symbol	H. sapiens	57185	H. sapiens	0.0	0.0	0.0	0.0	0.0	0.0	0.0	0.0	0.0	0.0	0.0	0.0	0.0	0.0	0.0	0.0	0.0	0.0	0.0	0.0
KRIT1	889	symbol	H. sapiens	889	H. sapiens	0.0	0.0	0.0	0.0	0.0	0.0	0.0	0.0	0.0	0.0	0.0	0.0	0.0	0.0	0.0	0.0	0.0	0.0	0.0	0.0
BAD	572	symbol	H. sapiens	572	H. sapiens	0.0	0.0	0.0	1.0	0.0	0.0	1.0	1.0	0.0	0.0	0.0	0.0	0.0	0.0	0.0	0.0	1.0	0.0	1.0	0.0
LASP1	3927	symbol	H. sapiens	3927	H. sapiens	0.0	0.0	0.0	0.0	0.0	0.0	0.0	0.0	0.0	0.0	0.0	0.0	0.0	0.0	0.0	0.0	0.0	0.0	0.0	0.0
SNX11	29916	symbol	H. sapiens	29916	H. sapiens	0.0	0.0	0.0	0.0	0.0	1.0	0.0	0.0	0.0	0.0	0.0	0.0	0.0	0.0	0.0	0.0	0.0	0.0	0.0	0.0
KLHL13	90293	symbol	H. sapiens	90293	H. sapiens	0.0	0.0	0.0	0.0	1.0	0.0	0.0	1.0	0.0	0.0	0.0	0.0	0.0	0.0	0.0	0.0	0.0	0.0	0.0	0.0
CFLAR	8837	symbol	H. sapiens	8837	H. sapiens	0.0	0.0	0.0	0.0	0.0	0.0	1.0	1.0	0.0	0.0	0.0	0.0	0.0	0.0	0.0	0.0	0.0	1.0	0.0	0.0
SARM1	23098	symbol	H. sapiens	23098	H. sapiens	0.0	0.0	0.0	0.0	0.0	0.0	0.0	1.0	0.0	0.0	0.0	0.0	0.0	0.0	0.0	0.0	0.0	0.0	0.0	0.0
PLXND1	23129	symbol	H. sapiens	23129	H. sapiens	0.0	0.0	0.0	0.0	0.0	0.0	1.0	0.0	0.0	0.0	0.0	0.0	0.0	0.0	0.0	0.0	0.0	0.0	0.0	0.0
AK2	204	symbol	H. sapiens	204	H. sapiens	0.0	0.0	0.0	1.0	0.0	0.0	0.0	0.0	0.0	0.0	0.0	0.0	0.0	0.0	0.0	0.0	0.0	0.0	0.0	0.0
NDUFAB1	4706	symbol	H. sapiens	4706	H. sapiens	0.0	1.0	0.0	1.0	0.0	0.0	0.0	0.0	0.0	1.0	0.0	0.0	0.0	0.0	0.0	0.0	0.0	0.0	1.0	0.0
DVL2	1856	symbol	H. sapiens	1856	H. sapiens	0.0	0.0	0.0	0.0	0.0	0.0	1.0	1.0	0.0	0.0	0.0	0.0	0.0	0.0	0.0	0.0	0.0	0.0	0.0	0.0
DHX33	56919	symbol	H. sapiens	56919	H. sapiens	0.0	0.0	0.0	0.0	0.0	0.0	0.0	0.0	0.0	0.0	0.0	0.0	0.0	0.0	0.0	0.0	0.0	0.0	0.0	0.0
RHBDD2	57414	symbol	H. sapiens	57414	H. sapiens	0.0	0.0	0.0	0.0	0.0	0.0	0.0	0.0	0.0	0.0	0.0	0.0	0.0	0.0	0.0	0.0	0.0	0.0	0.0	0.0
ITGA3	3675	symbol	H. sapiens	3675	H. sapiens	0.0	0.0	0.0	0.0	0.0	0.0	0.0	1.0	0.0	0.0	0.0	0.0	0.0	0.0	0.0	0.0	0.0	0.0	0.0	0.0
ZNF263	10127	symbol	H. sapiens	10127	H. sapiens	0.0	0.0	0.0	0.0	0.0	0.0	0.0	0.0	0.0	0.0	0.0	0.0	0.0	0.0	0.0	0.0	0.0	0.0	0.0	0.0
TNFRSF12A	51330	symbol	H. sapiens	51330	H. sapiens	0.0	0.0	0.0	0.0	0.0	0.0	0.0	1.0	0.0	0.0	0.0	0.0	0.0	0.0	0.0	0.0	0.0	0.0	0.0	0.0
MAP3K9	4293	symbol	H. sapiens	4293	H. sapiens	0.0	0.0	0.0	0.0	0.0	0.0	0.0	0.0	0.0	0.0	0.0	0.0	0.0	0.0	0.0	0.0	0.0	0.0	0.0	0.0
KDM7A	80853	symbol	H. sapiens	80853	H. sapiens	0.0	1.0	0.0	0.0	0.0	0.0	0.0	0.0	0.0	0.0	0.0	0.0	0.0	0.0	0.0	0.0	0.0	0.0	0.0	0.0
DBF4	10926	symbol	H. sapiens	10926	H. sapiens	0.0	0.0	0.0	0.0	1.0	0.0	0.0	0.0	0.0	0.0	0.0	0.0	0.0	0.0	0.0	0.0	0.0	0.0	0.0	0.0
MARK4	57787	symbol	H. sapiens	57787	H. sapiens	0.0	0.0	1.0	0.0	1.0	1.0	0.0	0.0	0.0	0.0	1.0	1.0	0.0	0.0	0.0	0.0	0.0	0.0	0.0	0.0
ST7L	54879	symbol	H. sapiens	54879	H. sapiens	0.0	0.0	0.0	0.0	0.0	0.0	0.0	0.0	0.0	0.0	0.0	0.0	0.0	0.0	0.0	0.0	0.0	0.0	0.0	0.0
LUC7L	55692	symbol	H. sapiens	55692	H. sapiens	1.0	0.0	0.0	0.0	0.0	0.0	0.0	0.0	1.0	0.0	0.0	0.0	0.0	0.0	0.0	0.0	0.0	0.0	0.0	0.0
CACNA2D2	9254	symbol	H. sapiens	9254	H. sapiens	0.0	0.0	0.0	0.0	0.0	0.0	0.0	0.0	0.0	0.0	0.0	0.0	0.0	0.0	0.0	0.0	0.0	0.0	0.0	0.0
MPND	84954	symbol	H. sapiens	84954	H. sapiens	0.0	0.0	0.0	0.0	0.0	0.0	0.0	0.0	0.0	0.0	0.0	0.0	0.0	0.0	0.0	0.0	0.0	0.0	0.0	0.0
MED24	9862	symbol	H. sapiens	9862	H. sapiens	0.0	0.0	0.0	0.0	0.0	0.0	0.0	0.0	0.0	0.0	0.0	0.0	0.0	0.0	0.0	0.0	0.0	0.0	0.0	0.0
SPRTN	83932	symbol	H. sapiens	83932	H. sapiens	0.0	0.0	0.0	0.0	0.0	0.0	0.0	0.0	0.0	0.0	0.0	0.0	0.0	0.0	0.0	0.0	0.0	0.0	0.0	0.0
ZNF200	7752	symbol	H. sapiens	7752	H. sapiens	0.0	0.0	0.0	0.0	0.0	0.0	0.0	0.0	0.0	0.0	0.0	0.0	0.0	0.0	0.0	0.0	0.0	0.0	0.0	0.0
LRRC23	10233	symbol	H. sapiens	10233	H. sapiens	0.0	0.0	0.0	0.0	0.0	0.0	0.0	0.0	0.0	0.0	0.0	0.0	0.0	0.0	0.0	0.0	0.0	0.0	0.0	0.0
TMEM159	57146	symbol	H. sapiens	57146	H. sapiens	0.0	0.0	0.0	0.0	0.0	0.0	0.0	0.0	0.0	0.0	0.0	0.0	0.0	0.0	0.0	0.0	0.0	0.0	0.0	0.0
BRCA1	672	symbol	H. sapiens	672	H. sapiens	0.0	1.0	0.0	1.0	1.0	0.0	0.0	1.0	0.0	1.0	0.0	1.0	0.0	1.0	0.0	0.0	0.0	0.0	0.0	0.0
CALCOCO1	57658	symbol	H. sapiens	57658	H. sapiens	0.0	0.0	0.0	0.0	0.0	0.0	0.0	1.0	0.0	0.0	0.0	0.0	0.0	0.0	0.0	0.0	0.0	0.0	0.0	0.0
SLC25A39	51629	symbol	H. sapiens	51629	H. sapiens	0.0	0.0	0.0	1.0	0.0	0.0	0.0	0.0	0.0	0.0	0.0	0.0	0.0	0.0	0.0	0.0	0.0	0.0	0.0	0.0
ZMYND11	10771	symbol	H. sapiens	10771	H. sapiens	0.0	0.0	0.0	0.0	0.0	0.0	0.0	0.0	0.0	0.0	0.0	0.0	0.0	0.0	0.0	0.0	0.0	0.0	0.0	0.0
CD74	972	symbol	H. sapiens	972	H. sapiens	0.0	0.0	0.0	1.0	0.0	0.0	0.0	1.0	0.0	1.0	0.0	0.0	0.0	0.0	0.0	0.0	0.0	0.0	0.0	0.0
STRAP	11171	symbol	H. sapiens	11171	H. sapiens	1.0	0.0	0.0	0.0	0.0	0.0	0.0	0.0	1.0	0.0	0.0	0.0	0.0	0.0	0.0	0.0	0.0	0.0	0.0	0.0
GCLM	2730	symbol	H. sapiens	2730	H. sapiens	0.0	0.0	0.0	1.0	0.0	0.0	0.0	0.0	0.0	0.0	0.0	0.0	1.0	0.0	0.0	0.0	0.0	0.0	1.0	0.0
HSD17B6	8630	symbol	H. sapiens	8630	H. sapiens	0.0	0.0	0.0	1.0	0.0	0.0	0.0	0.0	0.0	1.0	0.0	0.0	0.0	0.0	0.0	0.0	0.0	0.0	0.0	0.0
RTEL1-TNFRSF6B	100533107	symbol	H. sapiens	100533107	H. sapiens	0.0	0.0	0.0	0.0	0.0	0.0	0.0	0.0	0.0	0.0	0.0	0.0	0.0	0.0	0.0	0.0	0.0	0.0	0.0	0.0
FAS	355	symbol	H. sapiens	355	H. sapiens	0.0	0.0	0.0	0.0	0.0	0.0	1.0	1.0	0.0	0.0	0.0	0.0	0.0	0.0	0.0	0.0	0.0	0.0	0.0	0.0
RABEP1	9135	symbol	H. sapiens	9135	H. sapiens	0.0	0.0	0.0	0.0	0.0	0.0	1.0	0.0	0.0	0.0	0.0	0.0	0.0	0.0	0.0	0.0	0.0	0.0	0.0	0.0
FAM13B	51306	symbol	H. sapiens	51306	H. sapiens	0.0	0.0	0.0	0.0	0.0	0.0	1.0	0.0	0.0	0.0	0.0	0.0	0.0	0.0	0.0	0.0	0.0	0.0	0.0	0.0
PNPLA6	10908	symbol	H. sapiens	10908	H. sapiens	0.0	0.0	0.0	1.0	0.0	0.0	0.0	0.0	0.0	1.0	0.0	0.0	0.0	0.0	0.0	0.0	0.0	0.0	0.0	0.0
ZCCHC8	55596	symbol	H. sapiens	55596	H. sapiens	0.0	0.0	0.0	0.0	0.0	0.0	0.0	0.0	1.0	0.0	0.0	0.0	0.0	0.0	0.0	0.0	0.0	0.0	0.0	0.0
SLC4A7	9497	symbol	H. sapiens	9497	H. sapiens	0.0	0.0	0.0	0.0	0.0	0.0	0.0	0.0	0.0	0.0	0.0	0.0	0.0	0.0	0.0	0.0	0.0	0.0	0.0	0.0
SKIV2L2	23517	gene_synonym	H. sapiens	23517	H. sapiens	1.0	0.0	0.0	1.0	0.0	0.0	0.0	0.0	1.0	0.0	0.0	0.0	0.0	0.0	0.0	0.0	0.0	0.0	0.0	0.0
ZFYVE16	9765	symbol	H. sapiens	9765	H. sapiens	0.0	0.0	0.0	0.0	0.0	1.0	0.0	0.0	0.0	0.0	0.0	0.0	0.0	0.0	0.0	0.0	0.0	0.0	1.0	0.0
SPDL1	54908	symbol	H. sapiens	54908	H. sapiens	0.0	1.0	0.0	0.0	1.0	1.0	0.0	0.0	0.0	0.0	0.0	1.0	0.0	0.0	0.0	0.0	0.0	0.0	0.0	0.0
STAU2	27067	symbol	H. sapiens	27067	H. sapiens	0.0	0.0	0.0	0.0	0.0	0.0	0.0	0.0	0.0	0.0	0.0	0.0	0.0	0.0	0.0	0.0	0.0	0.0	0.0	0.0
INPP4A	3631	symbol	H. sapiens	3631	H. sapiens	0.0	0.0	0.0	1.0	0.0	0.0	0.0	0.0	0.0	1.0	0.0	0.0	0.0	0.0	0.0	0.0	0.0	0.0	0.0	0.0
RETSAT	54884	symbol	H. sapiens	54884	H. sapiens	0.0	0.0	0.0	0.0	0.0	0.0	0.0	0.0	0.0	0.0	0.0	0.0	0.0	0.0	0.0	0.0	0.0	0.0	0.0	0.0
OFD1	8481	symbol	H. sapiens	8481	H. sapiens	0.0	0.0	1.0	0.0	1.0	1.0	0.0	0.0	0.0	0.0	0.0	1.0	0.0	0.0	0.0	0.0	0.0	0.0	0.0	0.0
POLR2B	5431	symbol	H. sapiens	5431	H. sapiens	1.0	0.0	0.0	0.0	0.0	0.0	0.0	0.0	1.0	0.0	0.0	0.0	0.0	0.0	0.0	0.0	0.0	0.0	0.0	0.0
DTNBP1	84062	symbol	H. sapiens	84062	H. sapiens	0.0	0.0	0.0	0.0	0.0	1.0	0.0	0.0	0.0	0.0	0.0	1.0	0.0	0.0	0.0	0.0	0.0	1.0	0.0	0.0
MAP4	4134	symbol	H. sapiens	4134	H. sapiens	0.0	0.0	1.0	0.0	0.0	1.0	0.0	0.0	0.0	0.0	1.0	1.0	0.0	0.0	0.0	0.0	0.0	0.0	0.0	0.0
NOP16	51491	symbol	H. sapiens	51491	H. sapiens	1.0	0.0	0.0	0.0	0.0	0.0	0.0	0.0	0.0	0.0	0.0	0.0	0.0	0.0	0.0	0.0	0.0	0.0	0.0	0.0
LETMD1	25875	symbol	H. sapiens	25875	H. sapiens	0.0	0.0	0.0	0.0	0.0	0.0	0.0	0.0	0.0	0.0	0.0	0.0	0.0	0.0	0.0	0.0	0.0	0.0	0.0	0.0
CYBA	1535	symbol	H. sapiens	1535	H. sapiens	0.0	0.0	0.0	1.0	0.0	0.0	0.0	1.0	0.0	0.0	0.0	0.0	0.0	0.0	0.0	0.0	0.0	0.0	0.0	0.0
PHPT1	29085	symbol	H. sapiens	29085	H. sapiens	0.0	0.0	0.0	0.0	0.0	0.0	0.0	1.0	0.0	0.0	0.0	1.0	0.0	0.0	0.0	0.0	0.0	1.0	0.0	0.0
ARID4B	51742	symbol	H. sapiens	51742	H. sapiens	0.0	1.0	0.0	0.0	0.0	0.0	0.0	0.0	0.0	0.0	0.0	0.0	0.0	0.0	0.0	0.0	0.0	0.0	0.0	0.0
KIF1B	23095	symbol	H. sapiens	23095	H. sapiens	0.0	0.0	0.0	0.0	0.0	1.0	0.0	0.0	0.0	0.0	0.0	1.0	0.0	0.0	0.0	0.0	0.0	0.0	0.0	0.0
PLEKHH1	57475	symbol	H. sapiens	57475	H. sapiens	0.0	0.0	0.0	0.0	0.0	0.0	0.0	0.0	0.0	0.0	0.0	0.0	0.0	0.0	0.0	0.0	0.0	0.0	0.0	0.0
FAM114A2	10827	symbol	H. sapiens	10827	H. sapiens	0.0	0.0	0.0	0.0	0.0	0.0	0.0	0.0	0.0	0.0	0.0	0.0	0.0	0.0	0.0	0.0	0.0	0.0	0.0	0.0
CYFIP2	26999	symbol	H. sapiens	26999	H. sapiens	0.0	0.0	1.0	0.0	0.0	0.0	1.0	1.0	0.0	0.0	0.0	0.0	0.0	0.0	0.0	0.0	0.0	0.0	0.0	0.0
TAB2	23118	symbol	H. sapiens	23118	H. sapiens	0.0	0.0	0.0	0.0	0.0	0.0	0.0	1.0	0.0	0.0	0.0	0.0	0.0	0.0	0.0	0.0	1.0	0.0	0.0	0.0
MRPL43	84545	symbol	H. sapiens	84545	H. sapiens	0.0	0.0	0.0	0.0	0.0	0.0	0.0	0.0	0.0	0.0	0.0	0.0	0.0	0.0	0.0	0.0	0.0	0.0	0.0	0.0
GYG2	8908	symbol	H. sapiens	8908	H. sapiens	0.0	0.0	0.0	1.0	0.0	0.0	0.0	0.0	0.0	0.0	0.0	0.0	0.0	0.0	0.0	0.0	0.0	0.0	0.0	0.0
PKP2	5318	symbol	H. sapiens	5318	H. sapiens	0.0	0.0	0.0	0.0	0.0	0.0	0.0	0.0	0.0	0.0	0.0	0.0	0.0	0.0	0.0	0.0	0.0	1.0	0.0	0.0
ATG5	9474	symbol	H. sapiens	9474	H. sapiens	0.0	1.0	1.0	0.0	0.0	0.0	0.0	1.0	0.0	1.0	0.0	0.0	0.0	0.0	0.0	0.0	1.0	0.0	1.0	1.0
PARP12	64761	symbol	H. sapiens	64761	H. sapiens	0.0	0.0	0.0	0.0	0.0	0.0	0.0	0.0	0.0	0.0	0.0	0.0	0.0	0.0	0.0	0.0	0.0	0.0	0.0	0.0
TARBP1	6894	symbol	H. sapiens	6894	H. sapiens	1.0	1.0	0.0	0.0	0.0	0.0	0.0	0.0	0.0	0.0	0.0	0.0	0.0	0.0	0.0	1.0	0.0	0.0	0.0	0.0
GATB	5188	symbol	H. sapiens	5188	H. sapiens	1.0	0.0	0.0	0.0	0.0	0.0	0.0	0.0	0.0	0.0	0.0	0.0	1.0	0.0	0.0	1.0	0.0	0.0	0.0	0.0
CDK17	5128	symbol	H. sapiens	5128	H. sapiens	0.0	0.0	0.0	0.0	0.0	0.0	0.0	0.0	0.0	0.0	0.0	0.0	0.0	0.0	0.0	0.0	0.0	0.0	0.0	0.0
PTPRU	10076	symbol	H. sapiens	10076	H. sapiens	0.0	0.0	0.0	0.0	0.0	0.0	0.0	1.0	0.0	0.0	0.0	0.0	0.0	0.0	0.0	0.0	0.0	0.0	0.0	0.0
SNRNP40	9410	symbol	H. sapiens	9410	H. sapiens	0.0	0.0	0.0	0.0	0.0	0.0	0.0	0.0	1.0	0.0	0.0	0.0	0.0	0.0	0.0	0.0	0.0	0.0	0.0	0.0
ZNF112	7771	symbol	H. sapiens	7771	H. sapiens	0.0	0.0	0.0	0.0	0.0	0.0	0.0	0.0	0.0	0.0	0.0	0.0	0.0	0.0	0.0	0.0	0.0	0.0	0.0	0.0
SPHK2	56848	symbol	H. sapiens	56848	H. sapiens	0.0	1.0	0.0	1.0	0.0	1.0	0.0	1.0	0.0	1.0	0.0	0.0	0.0	0.0	0.0	0.0	0.0	0.0	0.0	0.0
DLX3	1747	symbol	H. sapiens	1747	H. sapiens	0.0	0.0	0.0	0.0	0.0	0.0	0.0	0.0	0.0	0.0	0.0	0.0	0.0	0.0	0.0	0.0	0.0	0.0	0.0	0.0
DDX20	11218	symbol	H. sapiens	11218	H. sapiens	1.0	0.0	0.0	0.0	0.0	0.0	0.0	0.0	1.0	1.0	0.0	0.0	0.0	0.0	0.0	0.0	0.0	0.0	0.0	0.0
BCAS1	8537	symbol	H. sapiens	8537	H. sapiens	0.0	0.0	0.0	0.0	0.0	0.0	0.0	0.0	0.0	0.0	0.0	0.0	0.0	0.0	0.0	0.0	0.0	0.0	0.0	0.0
TMEM206	55248	gene_synonym	H. sapiens	55248	H. sapiens	0.0	0.0	0.0	0.0	0.0	0.0	0.0	0.0	0.0	0.0	0.0	0.0	0.0	0.0	0.0	0.0	0.0	0.0	0.0	0.0
TLE2	7089	symbol	H. sapiens	7089	H. sapiens	0.0	0.0	0.0	0.0	0.0	0.0	0.0	1.0	0.0	0.0	0.0	0.0	0.0	0.0	0.0	0.0	0.0	0.0	0.0	0.0
TBC1D1	23216	symbol	H. sapiens	23216	H. sapiens	0.0	0.0	1.0	0.0	0.0	0.0	1.0	0.0	0.0	0.0	0.0	0.0	0.0	0.0	0.0	0.0	0.0	0.0	0.0	0.0
PDE4A	5141	symbol	H. sapiens	5141	H. sapiens	0.0	0.0	0.0	1.0	0.0	0.0	0.0	0.0	0.0	0.0	0.0	0.0	0.0	0.0	0.0	0.0	0.0	0.0	0.0	0.0
SMARCD1	6602	symbol	H. sapiens	6602	H. sapiens	0.0	0.0	0.0	0.0	0.0	0.0	0.0	0.0	0.0	0.0	0.0	0.0	0.0	0.0	0.0	0.0	0.0	0.0	0.0	0.0
ELOVL1	64834	symbol	H. sapiens	64834	H. sapiens	0.0	0.0	0.0	1.0	0.0	0.0	0.0	0.0	0.0	1.0	0.0	0.0	1.0	0.0	0.0	0.0	0.0	0.0	0.0	0.0
ZNRD1	30834	symbol	H. sapiens	30834	H. sapiens	0.0	0.0	0.0	0.0	0.0	0.0	0.0	0.0	0.0	0.0	0.0	0.0	0.0	0.0	0.0	0.0	0.0	0.0	0.0	0.0
ATXN3	4287	symbol	H. sapiens	4287	H. sapiens	0.0	0.0	0.0	0.0	0.0	0.0	0.0	1.0	0.0	0.0	0.0	1.0	0.0	1.0	0.0	0.0	0.0	1.0	0.0	0.0
EML1	2009	symbol	H. sapiens	2009	H. sapiens	0.0	0.0	0.0	0.0	0.0	0.0	0.0	1.0	0.0	0.0	0.0	1.0	0.0	0.0	0.0	0.0	0.0	0.0	0.0	0.0
FECH	2235	symbol	H. sapiens	2235	H. sapiens	0.0	0.0	0.0	1.0	0.0	0.0	0.0	0.0	0.0	0.0	0.0	0.0	0.0	0.0	0.0	0.0	0.0	0.0	0.0	0.0
DHX29	54505	symbol	H. sapiens	54505	H. sapiens	0.0	0.0	0.0	0.0	0.0	0.0	0.0	0.0	0.0	0.0	0.0	0.0	0.0	0.0	0.0	0.0	0.0	0.0	0.0	0.0
PRKCZ	5590	symbol	H. sapiens	5590	H. sapiens	0.0	0.0	0.0	0.0	0.0	1.0	1.0	1.0	0.0	0.0	0.0	1.0	0.0	0.0	0.0	0.0	0.0	0.0	0.0	0.0
COASY	80347	symbol	H. sapiens	80347	H. sapiens	0.0	0.0	0.0	1.0	0.0	0.0	0.0	0.0	0.0	0.0	0.0	0.0	0.0	0.0	0.0	0.0	0.0	0.0	0.0	0.0
TTC7A	57217	symbol	H. sapiens	57217	H. sapiens	0.0	0.0	0.0	0.0	0.0	0.0	0.0	0.0	0.0	1.0	0.0	0.0	0.0	0.0	0.0	0.0	0.0	0.0	0.0	0.0
IP6K2	51447	symbol	H. sapiens	51447	H. sapiens	0.0	0.0	0.0	1.0	0.0	0.0	0.0	1.0	0.0	1.0	0.0	0.0	0.0	0.0	0.0	0.0	0.0	0.0	0.0	0.0
PSME4	23198	symbol	H. sapiens	23198	H. sapiens	0.0	0.0	0.0	1.0	1.0	0.0	1.0	1.0	0.0	0.0	0.0	0.0	1.0	1.0	0.0	0.0	0.0	0.0	0.0	0.0
IFT80	57560	symbol	H. sapiens	57560	H. sapiens	0.0	0.0	1.0	0.0	0.0	0.0	0.0	1.0	0.0	0.0	1.0	1.0	0.0	0.0	0.0	0.0	0.0	0.0	0.0	0.0
KCNAB2	8514	symbol	H. sapiens	8514	H. sapiens	0.0	0.0	0.0	1.0	0.0	0.0	0.0	1.0	0.0	0.0	0.0	0.0	0.0	0.0	0.0	0.0	0.0	0.0	0.0	0.0
RAB27A	5873	symbol	H. sapiens	5873	H. sapiens	0.0	0.0	0.0	0.0	0.0	1.0	0.0	1.0	0.0	0.0	0.0	0.0	0.0	0.0	0.0	0.0	0.0	0.0	1.0	0.0
HDHD5	27440	symbol	H. sapiens	27440	H. sapiens	0.0	0.0	0.0	1.0	0.0	0.0	0.0	0.0	0.0	1.0	0.0	0.0	0.0	0.0	0.0	0.0	0.0	0.0	0.0	0.0
PFN2	5217	symbol	H. sapiens	5217	H. sapiens	0.0	0.0	1.0	0.0	0.0	1.0	1.0	0.0	0.0	0.0	0.0	1.0	0.0	0.0	0.0	0.0	0.0	1.0	0.0	0.0
DGCR2	9993	symbol	H. sapiens	9993	H. sapiens	0.0	0.0	0.0	0.0	0.0	0.0	0.0	0.0	0.0	0.0	0.0	0.0	0.0	0.0	0.0	0.0	0.0	0.0	0.0	0.0
RNF126	55658	symbol	H. sapiens	55658	H. sapiens	0.0	0.0	0.0	0.0	0.0	0.0	0.0	0.0	0.0	0.0	0.0	0.0	0.0	1.0	0.0	0.0	0.0	0.0	0.0	0.0
CFAP20	29105	symbol	H. sapiens	29105	H. sapiens	0.0	0.0	1.0	0.0	0.0	0.0	0.0	0.0	0.0	0.0	0.0	1.0	0.0	0.0	0.0	0.0	0.0	0.0	0.0	0.0
SNX13	23161	symbol	H. sapiens	23161	H. sapiens	0.0	0.0	0.0	0.0	0.0	0.0	1.0	0.0	0.0	0.0	0.0	0.0	0.0	0.0	0.0	0.0	0.0	0.0	0.0	0.0
RPS6KA2	6196	symbol	H. sapiens	6196	H. sapiens	0.0	0.0	0.0	0.0	1.0	0.0	0.0	0.0	0.0	0.0	0.0	0.0	0.0	0.0	0.0	0.0	0.0	0.0	0.0	0.0
VASH1	22846	symbol	H. sapiens	22846	H. sapiens	0.0	0.0	0.0	0.0	1.0	0.0	0.0	0.0	0.0	0.0	0.0	0.0	0.0	0.0	0.0	0.0	0.0	0.0	0.0	0.0
TCF3	6929	symbol	H. sapiens	6929	H. sapiens	0.0	0.0	0.0	0.0	0.0	0.0	0.0	1.0	0.0	0.0	0.0	0.0	0.0	0.0	0.0	0.0	0.0	0.0	0.0	0.0
ACTN1	87	symbol	H. sapiens	87	H. sapiens	0.0	0.0	0.0	0.0	0.0	0.0	0.0	0.0	0.0	0.0	0.0	0.0	0.0	0.0	0.0	0.0	0.0	1.0	0.0	0.0
EPN2	22905	symbol	H. sapiens	22905	H. sapiens	0.0	0.0	0.0	0.0	0.0	0.0	0.0	0.0	0.0	0.0	0.0	0.0	0.0	0.0	0.0	0.0	0.0	0.0	0.0	0.0
AFF4	27125	symbol	H. sapiens	27125	H. sapiens	0.0	0.0	0.0	0.0	0.0	0.0	0.0	0.0	0.0	0.0	0.0	0.0	0.0	0.0	0.0	0.0	0.0	0.0	0.0	0.0
UBE2D1	7321	symbol	H. sapiens	7321	H. sapiens	0.0	0.0	0.0	0.0	1.0	0.0	0.0	1.0	0.0	0.0	0.0	0.0	0.0	1.0	0.0	0.0	0.0	0.0	1.0	0.0
MARK2	2011	symbol	H. sapiens	2011	H. sapiens	0.0	0.0	0.0	0.0	0.0	1.0	0.0	1.0	0.0	0.0	0.0	1.0	0.0	0.0	0.0	0.0	1.0	0.0	1.0	1.0
NFATC3	4775	symbol	H. sapiens	4775	H. sapiens	0.0	0.0	0.0	0.0	0.0	0.0	0.0	1.0	0.0	0.0	0.0	0.0	0.0	0.0	0.0	0.0	0.0	0.0	0.0	0.0
SIDT1	54847	symbol	H. sapiens	54847	H. sapiens	0.0	0.0	0.0	0.0	0.0	0.0	0.0	0.0	0.0	0.0	0.0	0.0	0.0	0.0	0.0	0.0	0.0	0.0	0.0	0.0
NDE1	54820	symbol	H. sapiens	54820	H. sapiens	0.0	0.0	1.0	0.0	1.0	1.0	0.0	0.0	0.0	0.0	0.0	1.0	0.0	0.0	0.0	0.0	0.0	0.0	0.0	0.0
AP1M1	8907	symbol	H. sapiens	8907	H. sapiens	0.0	0.0	0.0	0.0	0.0	1.0	0.0	1.0	0.0	0.0	0.0	0.0	0.0	0.0	0.0	0.0	0.0	0.0	0.0	0.0
SDHA	6389	symbol	H. sapiens	6389	H. sapiens	0.0	0.0	0.0	1.0	0.0	0.0	0.0	0.0	0.0	0.0	0.0	0.0	0.0	0.0	0.0	0.0	0.0	0.0	0.0	0.0
ARHGEF10L	55160	symbol	H. sapiens	55160	H. sapiens	0.0	0.0	0.0	0.0	0.0	0.0	1.0	0.0	0.0	0.0	0.0	1.0	0.0	0.0	0.0	0.0	0.0	1.0	0.0	0.0
NUP37	79023	symbol	H. sapiens	79023	H. sapiens	0.0	1.0	0.0	1.0	0.0	0.0	0.0	1.0	0.0	0.0	0.0	0.0	0.0	0.0	0.0	0.0	0.0	0.0	0.0	0.0
GRAMD4	23151	symbol	H. sapiens	23151	H. sapiens	0.0	0.0	0.0	0.0	0.0	0.0	1.0	1.0	0.0	0.0	0.0	0.0	0.0	0.0	0.0	0.0	0.0	0.0	0.0	0.0
TIMM21	29090	symbol	H. sapiens	29090	H. sapiens	0.0	0.0	0.0	0.0	0.0	0.0	0.0	0.0	0.0	0.0	0.0	0.0	0.0	0.0	0.0	0.0	0.0	0.0	1.0	0.0
FRYL	285527	symbol	H. sapiens	285527	H. sapiens	0.0	0.0	0.0	0.0	0.0	0.0	0.0	0.0	0.0	0.0	0.0	0.0	0.0	0.0	0.0	0.0	0.0	0.0	0.0	0.0
WDR62	284403	symbol	H. sapiens	284403	H. sapiens	0.0	0.0	0.0	0.0	0.0	0.0	0.0	0.0	0.0	0.0	0.0	1.0	0.0	0.0	0.0	0.0	0.0	0.0	0.0	0.0
SART3	9733	symbol	H. sapiens	9733	H. sapiens	1.0	1.0	0.0	0.0	0.0	0.0	0.0	1.0	1.0	0.0	0.0	0.0	0.0	0.0	0.0	0.0	0.0	0.0	0.0	0.0
REXO2	25996	symbol	H. sapiens	25996	H. sapiens	0.0	0.0	0.0	1.0	0.0	0.0	0.0	0.0	0.0	0.0	0.0	0.0	0.0	0.0	0.0	0.0	0.0	0.0	0.0	0.0
MBNL3	55796	symbol	H. sapiens	55796	H. sapiens	0.0	0.0	0.0	0.0	0.0	0.0	0.0	1.0	1.0	0.0	0.0	0.0	0.0	0.0	0.0	0.0	0.0	0.0	0.0	0.0
IL4R	3566	symbol	H. sapiens	3566	H. sapiens	0.0	0.0	0.0	0.0	0.0	1.0	0.0	1.0	0.0	0.0	0.0	0.0	0.0	0.0	0.0	0.0	0.0	0.0	0.0	0.0
LRCH4	4034	symbol	H. sapiens	4034	H. sapiens	0.0	0.0	0.0	0.0	0.0	0.0	0.0	0.0	0.0	0.0	0.0	0.0	0.0	0.0	0.0	0.0	0.0	0.0	0.0	0.0
UBE2A	7319	symbol	H. sapiens	7319	H. sapiens	0.0	1.0	0.0	0.0	0.0	0.0	0.0	0.0	0.0	0.0	0.0	0.0	0.0	1.0	0.0	0.0	0.0	0.0	0.0	0.0
ARAF	369	symbol	H. sapiens	369	H. sapiens	0.0	0.0	0.0	0.0	0.0	0.0	0.0	0.0	0.0	0.0	0.0	0.0	0.0	1.0	0.0	0.0	0.0	0.0	0.0	0.0
MCCC1	56922	symbol	H. sapiens	56922	H. sapiens	0.0	0.0	0.0	1.0	0.0	0.0	0.0	0.0	0.0	0.0	0.0	0.0	1.0	0.0	0.0	0.0	0.0	0.0	0.0	0.0
ACER3	55331	symbol	H. sapiens	55331	H. sapiens	0.0	0.0	0.0	0.0	0.0	0.0	0.0	0.0	0.0	1.0	0.0	0.0	0.0	0.0	0.0	0.0	0.0	0.0	0.0	0.0
PIK3C3	5289	symbol	H. sapiens	5289	H. sapiens	0.0	0.0	0.0	1.0	1.0	1.0	0.0	1.0	0.0	1.0	0.0	0.0	0.0	0.0	0.0	0.0	1.0	0.0	0.0	1.0
PPP2R5C	5527	symbol	H. sapiens	5527	H. sapiens	0.0	0.0	0.0	0.0	0.0	0.0	0.0	0.0	0.0	0.0	0.0	0.0	0.0	1.0	0.0	0.0	0.0	0.0	0.0	0.0
MLLT10	8028	symbol	H. sapiens	8028	H. sapiens	0.0	0.0	0.0	0.0	0.0	0.0	0.0	0.0	0.0	0.0	0.0	0.0	0.0	0.0	0.0	0.0	0.0	0.0	0.0	0.0
PCM1	5108	symbol	H. sapiens	5108	H. sapiens	0.0	0.0	1.0	0.0	1.0	1.0	0.0	0.0	0.0	0.0	1.0	1.0	0.0	0.0	0.0	0.0	0.0	0.0	0.0	0.0
TP73	7161	symbol	H. sapiens	7161	H. sapiens	0.0	0.0	0.0	0.0	1.0	0.0	0.0	1.0	0.0	0.0	0.0	0.0	0.0	0.0	0.0	0.0	0.0	0.0	1.0	0.0
SMARCA2	6595	symbol	H. sapiens	6595	H. sapiens	0.0	0.0	0.0	0.0	0.0	0.0	0.0	0.0	0.0	0.0	0.0	0.0	0.0	0.0	0.0	0.0	0.0	0.0	0.0	0.0
CPOX	1371	symbol	H. sapiens	1371	H. sapiens	0.0	0.0	0.0	1.0	0.0	0.0	0.0	0.0	0.0	0.0	0.0	0.0	0.0	0.0	0.0	0.0	0.0	0.0	0.0	0.0
RSBN1	54665	symbol	H. sapiens	54665	H. sapiens	0.0	0.0	0.0	0.0	0.0	0.0	0.0	0.0	0.0	0.0	0.0	0.0	0.0	0.0	0.0	0.0	0.0	0.0	0.0	0.0
ZNF506	440515	symbol	H. sapiens	440515	H. sapiens	0.0	0.0	0.0	0.0	0.0	0.0	0.0	0.0	0.0	0.0	0.0	0.0	0.0	0.0	0.0	0.0	0.0	0.0	0.0	0.0
CCNT2	905	symbol	H. sapiens	905	H. sapiens	1.0	0.0	0.0	0.0	0.0	0.0	0.0	0.0	0.0	0.0	0.0	0.0	0.0	0.0	0.0	0.0	0.0	0.0	0.0	0.0
GRHL2	79977	symbol	H. sapiens	79977	H. sapiens	0.0	1.0	0.0	0.0	0.0	0.0	0.0	0.0	0.0	0.0	0.0	0.0	0.0	0.0	0.0	0.0	0.0	0.0	0.0	0.0
OXCT1	5019	symbol	H. sapiens	5019	H. sapiens	0.0	0.0	0.0	1.0	0.0	0.0	0.0	1.0	0.0	0.0	0.0	0.0	0.0	0.0	0.0	0.0	0.0	0.0	0.0	0.0
STARD7	56910	symbol	H. sapiens	56910	H. sapiens	0.0	0.0	0.0	1.0	0.0	0.0	0.0	0.0	0.0	1.0	0.0	0.0	0.0	0.0	0.0	0.0	0.0	0.0	0.0	0.0
APLP2	334	symbol	H. sapiens	334	H. sapiens	0.0	0.0	0.0	0.0	0.0	0.0	0.0	1.0	0.0	0.0	0.0	0.0	0.0	0.0	0.0	0.0	0.0	0.0	0.0	0.0
MYNN	55892	symbol	H. sapiens	55892	H. sapiens	0.0	0.0	0.0	0.0	0.0	0.0	0.0	0.0	0.0	0.0	0.0	0.0	0.0	0.0	0.0	0.0	0.0	0.0	0.0	0.0
MECOM	2122	symbol	H. sapiens	2122	H. sapiens	0.0	1.0	0.0	0.0	0.0	0.0	0.0	0.0	0.0	0.0	0.0	0.0	0.0	0.0	0.0	0.0	0.0	0.0	0.0	0.0
SEH1L	81929	symbol	H. sapiens	81929	H. sapiens	0.0	1.0	0.0	1.0	0.0	1.0	0.0	1.0	0.0	0.0	0.0	0.0	0.0	0.0	0.0	0.0	0.0	0.0	0.0	0.0
USP40	55230	symbol	H. sapiens	55230	H. sapiens	0.0	0.0	0.0	0.0	0.0	0.0	0.0	1.0	0.0	0.0	0.0	0.0	0.0	1.0	0.0	0.0	0.0	0.0	0.0	0.0
DNM1L	10059	symbol	H. sapiens	10059	H. sapiens	0.0	0.0	0.0	1.0	0.0	1.0	1.0	1.0	0.0	0.0	0.0	0.0	0.0	0.0	0.0	0.0	1.0	0.0	1.0	1.0
DNMT3B	1789	symbol	H. sapiens	1789	H. sapiens	0.0	1.0	0.0	0.0	0.0	0.0	0.0	1.0	0.0	0.0	0.0	0.0	0.0	0.0	0.0	0.0	0.0	0.0	0.0	0.0
EPB41L1	2036	symbol	H. sapiens	2036	H. sapiens	0.0	0.0	0.0	0.0	0.0	0.0	0.0	0.0	0.0	0.0	0.0	0.0	0.0	0.0	0.0	0.0	0.0	1.0	0.0	0.0
ANKRD10	55608	symbol	H. sapiens	55608	H. sapiens	0.0	0.0	0.0	0.0	0.0	0.0	0.0	0.0	0.0	0.0	0.0	0.0	0.0	0.0	0.0	0.0	0.0	0.0	0.0	0.0
FKBP1A	2280	symbol	H. sapiens	2280	H. sapiens	0.0	0.0	0.0	0.0	0.0	0.0	0.0	0.0	0.0	0.0	0.0	0.0	0.0	0.0	0.0	0.0	0.0	0.0	0.0	0.0
TRMT6	51605	symbol	H. sapiens	51605	H. sapiens	1.0	1.0	0.0	0.0	0.0	0.0	0.0	0.0	0.0	0.0	0.0	0.0	0.0	0.0	0.0	1.0	0.0	0.0	0.0	0.0
CDIP1	29965	symbol	H. sapiens	29965	H. sapiens	0.0	0.0	0.0	0.0	0.0	0.0	0.0	1.0	0.0	0.0	0.0	0.0	0.0	0.0	0.0	0.0	0.0	0.0	0.0	0.0
GMIP	51291	symbol	H. sapiens	51291	H. sapiens	0.0	0.0	0.0	0.0	0.0	0.0	1.0	0.0	0.0	0.0	0.0	0.0	0.0	0.0	0.0	0.0	0.0	0.0	0.0	0.0
MLF2	8079	symbol	H. sapiens	8079	H. sapiens	0.0	0.0	0.0	0.0	0.0	0.0	0.0	0.0	0.0	0.0	0.0	0.0	0.0	0.0	0.0	0.0	0.0	0.0	0.0	0.0
DDX24	57062	symbol	H. sapiens	57062	H. sapiens	1.0	0.0	0.0	0.0	0.0	0.0	0.0	0.0	0.0	0.0	0.0	0.0	0.0	0.0	0.0	0.0	0.0	0.0	0.0	0.0
NECAP1	25977	symbol	H. sapiens	25977	H. sapiens	0.0	0.0	0.0	0.0	0.0	0.0	0.0	0.0	0.0	0.0	0.0	0.0	0.0	0.0	0.0	0.0	0.0	0.0	0.0	0.0
LTBP4	8425	symbol	H. sapiens	8425	H. sapiens	0.0	0.0	0.0	0.0	0.0	0.0	0.0	0.0	0.0	0.0	0.0	0.0	0.0	0.0	0.0	0.0	0.0	0.0	0.0	0.0
STRN4	29888	symbol	H. sapiens	29888	H. sapiens	0.0	0.0	0.0	0.0	0.0	0.0	0.0	0.0	0.0	0.0	0.0	0.0	0.0	0.0	0.0	0.0	0.0	0.0	0.0	0.0
ZNF268	10795	symbol	H. sapiens	10795	H. sapiens	0.0	0.0	0.0	0.0	1.0	0.0	0.0	0.0	0.0	0.0	0.0	0.0	0.0	0.0	0.0	0.0	0.0	0.0	0.0	0.0
PDPR	55066	symbol	H. sapiens	55066	H. sapiens	0.0	0.0	0.0	1.0	0.0	0.0	0.0	1.0	0.0	0.0	0.0	0.0	1.0	0.0	0.0	0.0	0.0	0.0	0.0	0.0
TNRC6A	27327	symbol	H. sapiens	27327	H. sapiens	0.0	0.0	0.0	1.0	0.0	0.0	0.0	1.0	0.0	0.0	0.0	0.0	0.0	0.0	0.0	0.0	0.0	0.0	0.0	0.0
PLEKHG2	64857	symbol	H. sapiens	64857	H. sapiens	0.0	0.0	0.0	0.0	0.0	0.0	0.0	0.0	0.0	0.0	0.0	1.0	0.0	0.0	0.0	0.0	0.0	1.0	0.0	0.0
EXOC1	55763	symbol	H. sapiens	55763	H. sapiens	0.0	0.0	0.0	0.0	0.0	0.0	0.0	0.0	0.0	0.0	0.0	0.0	0.0	0.0	0.0	0.0	1.0	0.0	0.0	0.0
DTX2	113878	symbol	H. sapiens	113878	H. sapiens	0.0	0.0	0.0	0.0	0.0	0.0	0.0	0.0	0.0	0.0	0.0	0.0	0.0	0.0	0.0	0.0	0.0	0.0	0.0	0.0
SEL1L3	23231	symbol	H. sapiens	23231	H. sapiens	0.0	0.0	0.0	0.0	0.0	0.0	0.0	0.0	0.0	0.0	0.0	0.0	0.0	0.0	0.0	0.0	0.0	0.0	0.0	0.0
OSGEP	55644	symbol	H. sapiens	55644	H. sapiens	1.0	0.0	0.0	0.0	0.0	0.0	0.0	0.0	0.0	0.0	0.0	0.0	0.0	0.0	0.0	1.0	0.0	0.0	0.0	0.0
SUPT16H	11198	symbol	H. sapiens	11198	H. sapiens	0.0	0.0	0.0	0.0	0.0	0.0	0.0	0.0	0.0	0.0	0.0	0.0	0.0	0.0	0.0	0.0	0.0	0.0	0.0	0.0
TOX4	9878	symbol	H. sapiens	9878	H. sapiens	0.0	0.0	0.0	0.0	0.0	0.0	0.0	0.0	0.0	0.0	0.0	0.0	0.0	0.0	0.0	0.0	0.0	0.0	0.0	0.0
GEMIN2	8487	symbol	H. sapiens	8487	H. sapiens	1.0	0.0	0.0	0.0	0.0	0.0	0.0	0.0	1.0	0.0	0.0	0.0	0.0	0.0	0.0	0.0	0.0	0.0	0.0	0.0
SEMA6A	57556	symbol	H. sapiens	57556	H. sapiens	0.0	0.0	0.0	0.0	0.0	0.0	0.0	1.0	0.0	0.0	0.0	0.0	0.0	0.0	0.0	0.0	0.0	0.0	0.0	0.0
TRPM7	54822	symbol	H. sapiens	54822	H. sapiens	0.0	0.0	0.0	0.0	0.0	0.0	0.0	0.0	0.0	0.0	0.0	0.0	0.0	0.0	0.0	0.0	0.0	1.0	0.0	0.0
SNAP23	8773	symbol	H. sapiens	8773	H. sapiens	0.0	0.0	0.0	0.0	0.0	1.0	0.0	1.0	0.0	0.0	0.0	0.0	0.0	0.0	0.0	0.0	0.0	0.0	0.0	0.0
UNC13D	201294	symbol	H. sapiens	201294	H. sapiens	0.0	0.0	0.0	0.0	0.0	1.0	0.0	0.0	0.0	0.0	0.0	0.0	0.0	0.0	0.0	0.0	0.0	0.0	0.0	0.0
MFSD11	79157	symbol	H. sapiens	79157	H. sapiens	0.0	0.0	0.0	0.0	0.0	0.0	0.0	0.0	0.0	0.0	0.0	0.0	0.0	0.0	0.0	0.0	0.0	0.0	0.0	0.0
NUP50	10762	symbol	H. sapiens	10762	H. sapiens	0.0	1.0	0.0	1.0	0.0	0.0	1.0	1.0	0.0	0.0	0.0	0.0	0.0	0.0	0.0	0.0	0.0	0.0	1.0	0.0
ECHDC1	55862	symbol	H. sapiens	55862	H. sapiens	0.0	0.0	0.0	1.0	0.0	0.0	0.0	0.0	0.0	0.0	0.0	0.0	0.0	0.0	0.0	0.0	0.0	0.0	0.0	0.0
LRRFIP2	9209	symbol	H. sapiens	9209	H. sapiens	0.0	0.0	0.0	0.0	0.0	0.0	0.0	1.0	0.0	0.0	0.0	0.0	0.0	0.0	0.0	0.0	0.0	0.0	0.0	0.0
SUCO	51430	symbol	H. sapiens	51430	H. sapiens	0.0	0.0	0.0	0.0	0.0	0.0	0.0	0.0	0.0	0.0	0.0	0.0	0.0	0.0	0.0	0.0	0.0	0.0	0.0	0.0
DHPS	1725	symbol	H. sapiens	1725	H. sapiens	0.0	1.0	0.0	0.0	0.0	0.0	0.0	0.0	0.0	0.0	0.0	0.0	0.0	0.0	0.0	0.0	0.0	0.0	0.0	0.0
HOOK2	29911	symbol	H. sapiens	29911	H. sapiens	0.0	0.0	0.0	0.0	0.0	1.0	0.0	0.0	0.0	0.0	0.0	1.0	0.0	0.0	0.0	0.0	0.0	0.0	0.0	0.0
ARCN1	372	symbol	H. sapiens	372	H. sapiens	0.0	0.0	0.0	0.0	0.0	1.0	0.0	0.0	0.0	0.0	0.0	0.0	0.0	0.0	0.0	0.0	0.0	0.0	0.0	0.0
PSMD5	5711	symbol	H. sapiens	5711	H. sapiens	0.0	0.0	0.0	1.0	1.0	0.0	0.0	1.0	0.0	0.0	0.0	0.0	1.0	1.0	0.0	0.0	0.0	0.0	0.0	0.0
NANS	54187	symbol	H. sapiens	54187	H. sapiens	0.0	0.0	0.0	1.0	0.0	0.0	0.0	0.0	0.0	0.0	0.0	0.0	0.0	0.0	0.0	0.0	0.0	0.0	0.0	0.0
SEMA4G	57715	symbol	H. sapiens	57715	H. sapiens	0.0	0.0	0.0	0.0	0.0	0.0	0.0	1.0	0.0	0.0	0.0	0.0	0.0	0.0	0.0	0.0	0.0	0.0	0.0	0.0
HIVEP1	3096	symbol	H. sapiens	3096	H. sapiens	0.0	0.0	0.0	0.0	0.0	0.0	0.0	0.0	0.0	0.0	0.0	0.0	0.0	0.0	0.0	0.0	0.0	0.0	0.0	0.0
HSD3B7	80270	symbol	H. sapiens	80270	H. sapiens	0.0	0.0	0.0	1.0	0.0	0.0	0.0	0.0	0.0	1.0	0.0	0.0	0.0	0.0	0.0	0.0	0.0	0.0	0.0	0.0
RASSF7	8045	symbol	H. sapiens	8045	H. sapiens	0.0	0.0	0.0	0.0	0.0	0.0	0.0	0.0	0.0	0.0	0.0	1.0	0.0	0.0	0.0	0.0	0.0	0.0	0.0	0.0
MED15	51586	symbol	H. sapiens	51586	H. sapiens	0.0	0.0	0.0	0.0	0.0	0.0	0.0	0.0	0.0	0.0	0.0	0.0	0.0	0.0	0.0	0.0	0.0	0.0	0.0	0.0
LZTR1	8216	symbol	H. sapiens	8216	H. sapiens	0.0	0.0	0.0	0.0	0.0	0.0	0.0	0.0	0.0	0.0	0.0	0.0	0.0	0.0	0.0	0.0	0.0	0.0	0.0	0.0
BCL2L13	23786	symbol	H. sapiens	23786	H. sapiens	0.0	0.0	0.0	0.0	0.0	0.0	1.0	0.0	0.0	0.0	0.0	0.0	0.0	0.0	0.0	0.0	0.0	0.0	0.0	0.0
TBC1D10A	83874	symbol	H. sapiens	83874	H. sapiens	0.0	0.0	1.0	0.0	0.0	0.0	1.0	0.0	0.0	0.0	0.0	0.0	0.0	0.0	0.0	0.0	0.0	0.0	0.0	0.0
PPIL2	23759	symbol	H. sapiens	23759	H. sapiens	0.0	0.0	0.0	0.0	0.0	0.0	0.0	0.0	0.0	0.0	0.0	0.0	0.0	1.0	0.0	0.0	0.0	0.0	0.0	0.0
HPS4	89781	symbol	H. sapiens	89781	H. sapiens	0.0	0.0	0.0	0.0	0.0	1.0	0.0	0.0	0.0	0.0	0.0	0.0	0.0	0.0	0.0	0.0	0.0	0.0	1.0	0.0
PIK3IP1	113791	symbol	H. sapiens	113791	H. sapiens	0.0	0.0	0.0	0.0	0.0	0.0	0.0	0.0	0.0	1.0	0.0	0.0	0.0	0.0	0.0	0.0	0.0	0.0	0.0	0.0
TFIP11	24144	symbol	H. sapiens	24144	H. sapiens	0.0	0.0	0.0	0.0	0.0	0.0	0.0	0.0	1.0	0.0	0.0	0.0	0.0	0.0	0.0	0.0	0.0	0.0	0.0	0.0
DNAL4	10126	symbol	H. sapiens	10126	H. sapiens	0.0	0.0	0.0	0.0	0.0	0.0	1.0	0.0	0.0	0.0	0.0	1.0	0.0	0.0	0.0	0.0	0.0	0.0	0.0	0.0
RHBDD3	25807	symbol	H. sapiens	25807	H. sapiens	0.0	0.0	0.0	0.0	0.0	0.0	0.0	0.0	0.0	0.0	0.0	0.0	0.0	1.0	0.0	0.0	0.0	0.0	0.0	0.0
PACSIN2	11252	symbol	H. sapiens	11252	H. sapiens	0.0	0.0	0.0	0.0	0.0	0.0	0.0	0.0	0.0	0.0	0.0	0.0	0.0	0.0	0.0	0.0	0.0	1.0	0.0	0.0
TOM1	10043	symbol	H. sapiens	10043	H. sapiens	0.0	0.0	0.0	0.0	0.0	0.0	0.0	0.0	0.0	0.0	0.0	0.0	0.0	0.0	0.0	0.0	0.0	0.0	0.0	0.0
ARSA	410	symbol	H. sapiens	410	H. sapiens	0.0	0.0	0.0	0.0	0.0	0.0	0.0	0.0	0.0	1.0	0.0	0.0	0.0	0.0	0.0	0.0	0.0	0.0	0.0	0.0
MIEF1	54471	symbol	H. sapiens	54471	H. sapiens	0.0	0.0	0.0	0.0	0.0	0.0	0.0	0.0	0.0	0.0	0.0	0.0	0.0	0.0	0.0	0.0	0.0	0.0	1.0	0.0
SGSM3	27352	symbol	H. sapiens	27352	H. sapiens	0.0	0.0	1.0	0.0	1.0	0.0	1.0	0.0	0.0	0.0	0.0	0.0	0.0	1.0	0.0	0.0	0.0	0.0	0.0	0.0
VCPKMT	79609	symbol	H. sapiens	79609	H. sapiens	0.0	1.0	0.0	0.0	0.0	0.0	0.0	0.0	0.0	0.0	0.0	0.0	0.0	0.0	0.0	0.0	0.0	0.0	0.0	0.0
PSMC6	5706	symbol	H. sapiens	5706	H. sapiens	0.0	0.0	0.0	1.0	1.0	0.0	0.0	1.0	0.0	0.0	0.0	0.0	1.0	1.0	0.0	0.0	0.0	0.0	0.0	0.0
GSTZ1	2954	symbol	H. sapiens	2954	H. sapiens	0.0	0.0	0.0	1.0	0.0	0.0	0.0	1.0	0.0	0.0	0.0	0.0	1.0	0.0	0.0	0.0	0.0	0.0	0.0	0.0
KIAA0586	9786	symbol	H. sapiens	9786	H. sapiens	0.0	0.0	1.0	0.0	0.0	0.0	0.0	0.0	0.0	0.0	0.0	0.0	0.0	0.0	0.0	0.0	0.0	0.0	0.0	0.0
MTHFD1	4522	symbol	H. sapiens	4522	H. sapiens	0.0	0.0	0.0	1.0	0.0	0.0	0.0	0.0	0.0	0.0	0.0	0.0	1.0	0.0	0.0	0.0	0.0	0.0	0.0	0.0
CCNB1IP1	57820	symbol	H. sapiens	57820	H. sapiens	0.0	0.0	0.0	0.0	0.0	0.0	0.0	0.0	0.0	0.0	0.0	0.0	0.0	0.0	0.0	0.0	0.0	0.0	0.0	0.0
KIAA0391	9692	gene_synonym	H. sapiens	9692	H. sapiens	1.0	1.0	0.0	0.0	0.0	0.0	0.0	0.0	0.0	0.0	0.0	0.0	0.0	0.0	1.0	1.0	0.0	0.0	0.0	0.0
C20orf24	55969	gene_synonym	H. sapiens	55969	H. sapiens	0.0	0.0	0.0	0.0	0.0	0.0	0.0	0.0	0.0	0.0	0.0	0.0	0.0	0.0	0.0	0.0	0.0	0.0	0.0	0.0
RIMS4	140730	symbol	H. sapiens	140730	H. sapiens	0.0	0.0	0.0	0.0	0.0	1.0	0.0	0.0	0.0	0.0	0.0	0.0	0.0	0.0	0.0	0.0	0.0	0.0	0.0	0.0
SALL4	57167	symbol	H. sapiens	57167	H. sapiens	0.0	0.0	0.0	0.0	0.0	0.0	0.0	0.0	0.0	0.0	0.0	0.0	0.0	0.0	0.0	0.0	0.0	0.0	0.0	0.0
CSTF1	1477	symbol	H. sapiens	1477	H. sapiens	0.0	0.0	0.0	0.0	0.0	0.0	0.0	0.0	1.0	0.0	0.0	0.0	0.0	0.0	0.0	0.0	0.0	0.0	0.0	0.0
SLCO4A1	28231	symbol	H. sapiens	28231	H. sapiens	0.0	0.0	0.0	0.0	0.0	0.0	0.0	0.0	0.0	0.0	0.0	0.0	0.0	0.0	0.0	0.0	0.0	0.0	0.0	0.0
RNF24	11237	symbol	H. sapiens	11237	H. sapiens	0.0	0.0	0.0	0.0	0.0	0.0	0.0	0.0	0.0	0.0	0.0	0.0	0.0	0.0	0.0	0.0	0.0	0.0	0.0	0.0
SEC23B	10483	symbol	H. sapiens	10483	H. sapiens	0.0	0.0	0.0	0.0	0.0	1.0	1.0	0.0	0.0	0.0	0.0	0.0	0.0	0.0	0.0	0.0	0.0	0.0	0.0	0.0
POFUT1	23509	symbol	H. sapiens	23509	H. sapiens	0.0	0.0	0.0	1.0	0.0	0.0	0.0	0.0	0.0	0.0	0.0	0.0	0.0	0.0	0.0	0.0	0.0	0.0	0.0	0.0
IDH3B	3420	symbol	H. sapiens	3420	H. sapiens	0.0	0.0	0.0	1.0	0.0	0.0	0.0	0.0	0.0	0.0	0.0	0.0	0.0	0.0	0.0	0.0	0.0	0.0	0.0	0.0
PXMP4	11264	symbol	H. sapiens	11264	H. sapiens	0.0	0.0	0.0	0.0	0.0	0.0	0.0	0.0	0.0	0.0	0.0	0.0	0.0	0.0	0.0	0.0	0.0	0.0	0.0	0.0
ACOT8	10005	symbol	H. sapiens	10005	H. sapiens	0.0	0.0	0.0	1.0	0.0	0.0	0.0	0.0	0.0	1.0	0.0	0.0	1.0	0.0	0.0	0.0	0.0	0.0	1.0	0.0
USP14	9097	symbol	H. sapiens	9097	H. sapiens	1.0	0.0	0.0	0.0	0.0	0.0	0.0	1.0	0.0	0.0	0.0	0.0	0.0	1.0	0.0	1.0	0.0	0.0	0.0	0.0
CEP192	55125	symbol	H. sapiens	55125	H. sapiens	0.0	0.0	1.0	0.0	1.0	1.0	0.0	0.0	0.0	0.0	1.0	1.0	0.0	0.0	0.0	0.0	0.0	0.0	0.0	0.0
RNMT	8731	symbol	H. sapiens	8731	H. sapiens	0.0	1.0	0.0	0.0	0.0	0.0	0.0	0.0	1.0	0.0	0.0	0.0	0.0	0.0	0.0	1.0	0.0	0.0	0.0	0.0
PRPS2	5634	symbol	H. sapiens	5634	H. sapiens	0.0	0.0	0.0	1.0	0.0	0.0	0.0	0.0	0.0	0.0	0.0	0.0	0.0	0.0	0.0	0.0	0.0	0.0	0.0	0.0
WDR13	64743	symbol	H. sapiens	64743	H. sapiens	0.0	0.0	0.0	0.0	0.0	0.0	0.0	0.0	0.0	0.0	0.0	0.0	0.0	0.0	0.0	0.0	0.0	0.0	0.0	0.0
SLC25A14	9016	symbol	H. sapiens	9016	H. sapiens	0.0	0.0	0.0	1.0	0.0	0.0	0.0	0.0	0.0	0.0	0.0	0.0	0.0	0.0	0.0	0.0	0.0	0.0	1.0	0.0
SLC35A2	7355	symbol	H. sapiens	7355	H. sapiens	0.0	0.0	0.0	1.0	0.0	0.0	0.0	0.0	0.0	0.0	0.0	0.0	0.0	0.0	0.0	0.0	0.0	0.0	0.0	0.0
MAGT1	84061	symbol	H. sapiens	84061	H. sapiens	0.0	0.0	0.0	1.0	0.0	0.0	0.0	0.0	0.0	0.0	0.0	0.0	0.0	0.0	0.0	0.0	0.0	0.0	0.0	0.0
MAGED2	10916	symbol	H. sapiens	10916	H. sapiens	0.0	0.0	0.0	0.0	0.0	0.0	0.0	0.0	0.0	0.0	0.0	0.0	0.0	0.0	0.0	0.0	0.0	0.0	0.0	0.0
SUPT20H	55578	symbol	H. sapiens	55578	H. sapiens	0.0	0.0	0.0	0.0	0.0	0.0	0.0	0.0	0.0	0.0	0.0	0.0	0.0	0.0	0.0	0.0	1.0	0.0	0.0	0.0
INTS6	26512	symbol	H. sapiens	26512	H. sapiens	1.0	0.0	0.0	0.0	0.0	0.0	0.0	0.0	0.0	0.0	0.0	0.0	0.0	0.0	0.0	0.0	0.0	0.0	0.0	0.0
TRADD	8717	symbol	H. sapiens	8717	H. sapiens	0.0	0.0	0.0	0.0	0.0	0.0	1.0	1.0	0.0	0.0	0.0	0.0	0.0	0.0	0.0	0.0	0.0	0.0	0.0	0.0
HSF4	3299	symbol	H. sapiens	3299	H. sapiens	0.0	1.0	0.0	0.0	0.0	0.0	0.0	1.0	0.0	0.0	0.0	0.0	0.0	0.0	0.0	0.0	0.0	0.0	0.0	0.0
MAPK3	5595	symbol	H. sapiens	5595	H. sapiens	0.0	1.0	0.0	1.0	0.0	0.0	1.0	1.0	0.0	0.0	0.0	1.0	0.0	0.0	0.0	0.0	1.0	0.0	0.0	1.0
ZNF821	55565	symbol	H. sapiens	55565	H. sapiens	0.0	0.0	0.0	0.0	0.0	0.0	0.0	0.0	0.0	0.0	0.0	0.0	0.0	0.0	0.0	0.0	0.0	0.0	0.0	0.0
NME3	4832	symbol	H. sapiens	4832	H. sapiens	0.0	0.0	0.0	1.0	0.0	0.0	0.0	0.0	0.0	0.0	0.0	0.0	0.0	0.0	0.0	0.0	0.0	0.0	0.0	0.0
NDRG4	65009	symbol	H. sapiens	65009	H. sapiens	0.0	0.0	1.0	0.0	0.0	1.0	0.0	0.0	0.0	0.0	0.0	0.0	0.0	0.0	0.0	0.0	0.0	0.0	0.0	0.0
SLC38A7	55238	symbol	H. sapiens	55238	H. sapiens	0.0	0.0	0.0	0.0	0.0	0.0	0.0	0.0	0.0	0.0	0.0	0.0	0.0	0.0	0.0	0.0	0.0	0.0	0.0	0.0
SMPD3	55512	symbol	H. sapiens	55512	H. sapiens	0.0	0.0	0.0	1.0	1.0	0.0	0.0	1.0	0.0	1.0	0.0	0.0	0.0	0.0	0.0	0.0	0.0	0.0	0.0	0.0
FA2H	79152	symbol	H. sapiens	79152	H. sapiens	0.0	0.0	0.0	1.0	0.0	0.0	0.0	0.0	0.0	1.0	0.0	0.0	0.0	0.0	0.0	0.0	0.0	0.0	0.0	0.0
TAF1C	9013	symbol	H. sapiens	9013	H. sapiens	0.0	0.0	0.0	0.0	0.0	0.0	0.0	0.0	0.0	0.0	0.0	0.0	0.0	0.0	0.0	0.0	0.0	0.0	0.0	0.0
COTL1	23406	symbol	H. sapiens	23406	H. sapiens	0.0	0.0	0.0	0.0	0.0	0.0	0.0	0.0	0.0	0.0	0.0	1.0	0.0	0.0	0.0	0.0	0.0	1.0	0.0	0.0
TSC2	7249	symbol	H. sapiens	7249	H. sapiens	0.0	0.0	0.0	0.0	0.0	0.0	1.0	1.0	0.0	0.0	0.0	0.0	0.0	0.0	0.0	0.0	1.0	0.0	1.0	1.0
ABCC1	4363	symbol	H. sapiens	4363	H. sapiens	0.0	0.0	0.0	1.0	0.0	0.0	0.0	1.0	0.0	0.0	0.0	0.0	0.0	0.0	0.0	0.0	0.0	0.0	0.0	0.0
LMF1	64788	symbol	H. sapiens	64788	H. sapiens	0.0	0.0	0.0	1.0	0.0	0.0	1.0	1.0	0.0	1.0	0.0	0.0	0.0	0.0	0.0	0.0	0.0	0.0	0.0	0.0
EARS2	124454	symbol	H. sapiens	124454	H. sapiens	1.0	0.0	0.0	0.0	0.0	0.0	0.0	0.0	0.0	0.0	0.0	0.0	1.0	0.0	1.0	1.0	0.0	0.0	0.0	0.0
DNAJA3	9093	symbol	H. sapiens	9093	H. sapiens	0.0	0.0	0.0	0.0	0.0	0.0	0.0	0.0	0.0	0.0	0.0	0.0	0.0	0.0	0.0	0.0	0.0	0.0	1.0	0.0
BFAR	51283	symbol	H. sapiens	51283	H. sapiens	0.0	0.0	0.0	0.0	0.0	0.0	0.0	0.0	0.0	0.0	0.0	0.0	0.0	1.0	0.0	0.0	0.0	0.0	0.0	0.0
NOMO1	23420	symbol	H. sapiens	23420	H. sapiens	0.0	0.0	0.0	0.0	0.0	0.0	0.0	0.0	0.0	0.0	0.0	0.0	0.0	0.0	0.0	0.0	0.0	0.0	0.0	0.0
SYT17	51760	symbol	H. sapiens	51760	H. sapiens	0.0	0.0	0.0	0.0	0.0	1.0	0.0	0.0	0.0	0.0	0.0	0.0	0.0	0.0	0.0	0.0	0.0	0.0	0.0	0.0
CCP110	9738	symbol	H. sapiens	9738	H. sapiens	0.0	0.0	1.0	0.0	1.0	1.0	0.0	1.0	0.0	0.0	0.0	1.0	0.0	0.0	0.0	0.0	0.0	0.0	0.0	0.0
EHD4	30844	symbol	H. sapiens	30844	H. sapiens	0.0	0.0	0.0	0.0	0.0	0.0	0.0	0.0	0.0	0.0	0.0	0.0	0.0	0.0	0.0	0.0	0.0	0.0	0.0	0.0
CEP152	22995	symbol	H. sapiens	22995	H. sapiens	0.0	0.0	1.0	0.0	1.0	1.0	0.0	0.0	0.0	0.0	0.0	1.0	0.0	0.0	0.0	0.0	0.0	0.0	0.0	0.0
GABPB1	2553	symbol	H. sapiens	2553	H. sapiens	0.0	0.0	0.0	0.0	0.0	0.0	0.0	0.0	0.0	0.0	0.0	0.0	0.0	0.0	0.0	0.0	0.0	0.0	1.0	0.0
BMF	90427	symbol	H. sapiens	90427	H. sapiens	0.0	0.0	0.0	0.0	0.0	0.0	0.0	0.0	0.0	0.0	0.0	0.0	0.0	0.0	0.0	0.0	1.0	0.0	1.0	0.0
SGK3	23678	symbol	H. sapiens	23678	H. sapiens	0.0	0.0	0.0	0.0	0.0	0.0	0.0	0.0	0.0	0.0	0.0	0.0	0.0	0.0	0.0	0.0	0.0	0.0	0.0	0.0
TRIM35	23087	symbol	H. sapiens	23087	H. sapiens	0.0	0.0	0.0	0.0	1.0	0.0	0.0	0.0	0.0	0.0	0.0	0.0	0.0	0.0	0.0	0.0	0.0	0.0	0.0	0.0
IKBKB	3551	symbol	H. sapiens	3551	H. sapiens	0.0	0.0	0.0	0.0	0.0	0.0	0.0	1.0	0.0	0.0	0.0	0.0	0.0	0.0	0.0	0.0	0.0	1.0	0.0	0.0
NCALD	83988	symbol	H. sapiens	83988	H. sapiens	0.0	0.0	0.0	0.0	0.0	0.0	0.0	0.0	0.0	0.0	0.0	0.0	0.0	0.0	0.0	0.0	0.0	0.0	0.0	0.0
UBR5	51366	symbol	H. sapiens	51366	H. sapiens	0.0	1.0	0.0	0.0	0.0	0.0	0.0	1.0	0.0	0.0	0.0	0.0	0.0	1.0	0.0	0.0	0.0	0.0	1.0	0.0
MTMR9	66036	symbol	H. sapiens	66036	H. sapiens	0.0	0.0	0.0	1.0	0.0	0.0	1.0	0.0	0.0	1.0	0.0	0.0	0.0	0.0	0.0	0.0	1.0	0.0	0.0	0.0
KCTD9	54793	symbol	H. sapiens	54793	H. sapiens	0.0	0.0	0.0	0.0	0.0	0.0	0.0	0.0	0.0	0.0	0.0	0.0	0.0	0.0	0.0	0.0	0.0	0.0	0.0	0.0
KCNN4	3783	symbol	H. sapiens	3783	H. sapiens	0.0	0.0	0.0	0.0	0.0	0.0	0.0	1.0	0.0	0.0	0.0	0.0	0.0	0.0	0.0	0.0	0.0	0.0	0.0	0.0
GYS1	2997	symbol	H. sapiens	2997	H. sapiens	0.0	0.0	0.0	1.0	0.0	0.0	0.0	0.0	0.0	0.0	0.0	0.0	0.0	0.0	0.0	0.0	0.0	0.0	0.0	0.0
NFKBIB	4793	symbol	H. sapiens	4793	H. sapiens	0.0	0.0	0.0	0.0	0.0	0.0	0.0	0.0	0.0	0.0	0.0	0.0	0.0	0.0	0.0	0.0	0.0	0.0	0.0	0.0
MED26	9441	symbol	H. sapiens	9441	H. sapiens	0.0	0.0	0.0	0.0	0.0	0.0	0.0	0.0	0.0	0.0	0.0	0.0	0.0	0.0	0.0	0.0	0.0	0.0	0.0	0.0
ZNF419	79744	symbol	H. sapiens	79744	H. sapiens	0.0	0.0	0.0	0.0	0.0	0.0	0.0	0.0	0.0	0.0	0.0	0.0	0.0	0.0	0.0	0.0	0.0	0.0	0.0	0.0
CCNE1	898	symbol	H. sapiens	898	H. sapiens	0.0	0.0	0.0	0.0	1.0	0.0	0.0	1.0	0.0	0.0	0.0	0.0	0.0	0.0	0.0	0.0	0.0	0.0	0.0	0.0
PRKD2	25865	symbol	H. sapiens	25865	H. sapiens	0.0	1.0	0.0	0.0	0.0	0.0	1.0	1.0	0.0	1.0	0.0	0.0	0.0	0.0	0.0	0.0	0.0	0.0	0.0	0.0
TYK2	7297	symbol	H. sapiens	7297	H. sapiens	0.0	0.0	0.0	0.0	0.0	0.0	0.0	1.0	0.0	0.0	0.0	0.0	0.0	0.0	0.0	0.0	0.0	0.0	0.0	0.0
CYTH2	9266	symbol	H. sapiens	9266	H. sapiens	0.0	0.0	0.0	0.0	0.0	0.0	0.0	0.0	0.0	0.0	0.0	0.0	0.0	0.0	0.0	0.0	0.0	1.0	0.0	0.0
CLEC11A	6320	symbol	H. sapiens	6320	H. sapiens	0.0	0.0	0.0	0.0	0.0	0.0	0.0	0.0	0.0	0.0	0.0	0.0	0.0	0.0	0.0	0.0	0.0	0.0	0.0	0.0
ELL	8178	symbol	H. sapiens	8178	H. sapiens	1.0	0.0	0.0	0.0	0.0	0.0	0.0	0.0	0.0	0.0	0.0	0.0	0.0	0.0	0.0	0.0	0.0	0.0	0.0	0.0
TMEM147	10430	symbol	H. sapiens	10430	H. sapiens	0.0	0.0	0.0	0.0	0.0	0.0	0.0	0.0	0.0	0.0	0.0	0.0	0.0	0.0	0.0	0.0	0.0	0.0	0.0	0.0
USF2	7392	symbol	H. sapiens	7392	H. sapiens	0.0	0.0	0.0	0.0	0.0	0.0	0.0	0.0	0.0	0.0	0.0	0.0	0.0	0.0	0.0	0.0	0.0	0.0	0.0	0.0
SCN1B	6324	symbol	H. sapiens	6324	H. sapiens	0.0	0.0	0.0	0.0	0.0	0.0	0.0	0.0	0.0	0.0	0.0	0.0	0.0	0.0	0.0	0.0	0.0	1.0	0.0	0.0
ZNF85	7639	symbol	H. sapiens	7639	H. sapiens	0.0	0.0	0.0	0.0	0.0	0.0	0.0	0.0	0.0	0.0	0.0	0.0	0.0	0.0	0.0	0.0	0.0	0.0	0.0	0.0
ETHE1	23474	symbol	H. sapiens	23474	H. sapiens	0.0	0.0	0.0	1.0	0.0	0.0	0.0	0.0	0.0	0.0	0.0	0.0	1.0	0.0	0.0	0.0	0.0	0.0	0.0	0.0
MPP6	51678	symbol	H. sapiens	51678	H. sapiens	0.0	0.0	0.0	0.0	0.0	0.0	0.0	0.0	0.0	0.0	0.0	0.0	0.0	0.0	0.0	0.0	0.0	0.0	0.0	0.0
LFNG	3955	symbol	H. sapiens	3955	H. sapiens	0.0	0.0	0.0	1.0	0.0	0.0	0.0	0.0	0.0	0.0	0.0	0.0	0.0	0.0	0.0	0.0	0.0	0.0	0.0	0.0
COBL	23242	symbol	H. sapiens	23242	H. sapiens	0.0	0.0	1.0	0.0	0.0	0.0	0.0	0.0	0.0	0.0	0.0	0.0	0.0	0.0	0.0	0.0	0.0	1.0	0.0	0.0
NSUN5P2	260294	symbol	H. sapiens	260294	H. sapiens	1.0	1.0	0.0	0.0	0.0	0.0	0.0	0.0	0.0	0.0	0.0	0.0	0.0	0.0	0.0	1.0	0.0	0.0	0.0	0.0
CASP2	835	symbol	H. sapiens	835	H. sapiens	0.0	0.0	0.0	0.0	1.0	0.0	0.0	0.0	0.0	0.0	0.0	0.0	0.0	0.0	0.0	0.0	0.0	0.0	0.0	0.0
ZKSCAN1	7586	symbol	H. sapiens	7586	H. sapiens	0.0	0.0	0.0	0.0	0.0	0.0	0.0	0.0	0.0	0.0	0.0	0.0	0.0	0.0	0.0	0.0	0.0	0.0	0.0	0.0
TAF6	6878	symbol	H. sapiens	6878	H. sapiens	1.0	0.0	0.0	0.0	1.0	0.0	0.0	0.0	0.0	0.0	0.0	0.0	0.0	0.0	0.0	0.0	0.0	0.0	0.0	0.0
MOSPD3	64598	symbol	H. sapiens	64598	H. sapiens	0.0	0.0	1.0	0.0	0.0	1.0	0.0	0.0	0.0	0.0	0.0	0.0	0.0	0.0	0.0	0.0	0.0	0.0	0.0	0.0
COA1	55744	symbol	H. sapiens	55744	H. sapiens	0.0	0.0	0.0	0.0	0.0	0.0	0.0	0.0	0.0	0.0	0.0	0.0	0.0	0.0	0.0	0.0	0.0	0.0	1.0	0.0
LIMK1	3984	symbol	H. sapiens	3984	H. sapiens	0.0	0.0	0.0	0.0	0.0	0.0	0.0	1.0	0.0	0.0	0.0	1.0	0.0	0.0	0.0	0.0	0.0	1.0	0.0	0.0
FSD1L	83856	symbol	H. sapiens	83856	H. sapiens	0.0	0.0	0.0	0.0	0.0	0.0	0.0	0.0	0.0	0.0	0.0	0.0	0.0	0.0	0.0	0.0	0.0	0.0	0.0	0.0
TLE4	7091	symbol	H. sapiens	7091	H. sapiens	0.0	0.0	0.0	0.0	0.0	0.0	0.0	1.0	0.0	0.0	0.0	0.0	0.0	0.0	0.0	0.0	0.0	0.0	0.0	0.0
SUSD1	64420	symbol	H. sapiens	64420	H. sapiens	0.0	0.0	0.0	0.0	0.0	0.0	0.0	0.0	0.0	0.0	0.0	0.0	0.0	0.0	0.0	0.0	0.0	0.0	0.0	0.0
TBC1D13	54662	symbol	H. sapiens	54662	H. sapiens	0.0	0.0	1.0	0.0	0.0	0.0	1.0	0.0	0.0	0.0	0.0	0.0	0.0	0.0	0.0	0.0	0.0	0.0	0.0	0.0
DOCK8	81704	symbol	H. sapiens	81704	H. sapiens	0.0	0.0	0.0	0.0	0.0	0.0	1.0	0.0	0.0	0.0	0.0	0.0	0.0	0.0	0.0	0.0	0.0	0.0	0.0	0.0
RAPGEF1	2889	symbol	H. sapiens	2889	H. sapiens	0.0	0.0	0.0	0.0	0.0	0.0	1.0	1.0	0.0	0.0	0.0	0.0	0.0	0.0	0.0	0.0	0.0	0.0	0.0	0.0
ZFAND5	7763	symbol	H. sapiens	7763	H. sapiens	0.0	0.0	0.0	0.0	0.0	0.0	0.0	0.0	0.0	0.0	0.0	0.0	0.0	0.0	0.0	0.0	0.0	0.0	0.0	0.0
HPS1	3257	symbol	H. sapiens	3257	H. sapiens	0.0	0.0	0.0	0.0	0.0	1.0	0.0	0.0	0.0	0.0	0.0	0.0	0.0	0.0	0.0	0.0	0.0	0.0	0.0	0.0
CCSER2	54462	symbol	H. sapiens	54462	H. sapiens	0.0	0.0	0.0	0.0	0.0	0.0	0.0	0.0	0.0	0.0	0.0	1.0	0.0	0.0	0.0	0.0	0.0	0.0	0.0	0.0
NPM3	10360	symbol	H. sapiens	10360	H. sapiens	1.0	0.0	0.0	0.0	0.0	0.0	0.0	0.0	0.0	0.0	0.0	0.0	0.0	0.0	0.0	0.0	0.0	0.0	0.0	0.0
LHPP	64077	symbol	H. sapiens	64077	H. sapiens	0.0	0.0	0.0	1.0	0.0	0.0	0.0	0.0	0.0	0.0	0.0	0.0	0.0	0.0	0.0	0.0	0.0	0.0	0.0	0.0
TBC1D12	23232	symbol	H. sapiens	23232	H. sapiens	0.0	0.0	0.0	0.0	0.0	0.0	1.0	0.0	0.0	0.0	0.0	0.0	0.0	0.0	0.0	0.0	0.0	0.0	0.0	0.0
PIGL	9487	symbol	H. sapiens	9487	H. sapiens	0.0	0.0	0.0	1.0	0.0	0.0	0.0	0.0	0.0	1.0	0.0	0.0	0.0	0.0	0.0	0.0	0.0	0.0	0.0	0.0
BLMH	642	symbol	H. sapiens	642	H. sapiens	0.0	0.0	0.0	0.0	0.0	0.0	0.0	0.0	0.0	0.0	0.0	0.0	1.0	1.0	0.0	0.0	0.0	0.0	0.0	0.0
GOSR1	9527	symbol	H. sapiens	9527	H. sapiens	0.0	0.0	0.0	0.0	0.0	1.0	0.0	0.0	0.0	0.0	0.0	0.0	0.0	0.0	0.0	0.0	0.0	0.0	0.0	0.0
DRG2	1819	symbol	H. sapiens	1819	H. sapiens	0.0	0.0	0.0	0.0	0.0	0.0	0.0	0.0	0.0	0.0	0.0	0.0	0.0	0.0	0.0	0.0	0.0	0.0	0.0	0.0
CCL2	6347	symbol	H. sapiens	6347	H. sapiens	0.0	0.0	0.0	0.0	1.0	0.0	1.0	1.0	0.0	0.0	0.0	0.0	0.0	0.0	0.0	0.0	0.0	0.0	0.0	0.0
NAGLU	4669	symbol	H. sapiens	4669	H. sapiens	0.0	0.0	0.0	0.0	0.0	0.0	0.0	0.0	0.0	0.0	0.0	0.0	0.0	0.0	0.0	0.0	0.0	0.0	0.0	0.0
HSD17B1	3292	symbol	H. sapiens	3292	H. sapiens	0.0	0.0	0.0	0.0	0.0	0.0	0.0	0.0	0.0	1.0	0.0	0.0	0.0	0.0	0.0	0.0	0.0	0.0	0.0	0.0
COL1A1	1277	symbol	H. sapiens	1277	H. sapiens	0.0	0.0	0.0	0.0	0.0	0.0	0.0	1.0	0.0	0.0	0.0	0.0	0.0	0.0	0.0	0.0	0.0	0.0	0.0	0.0
MPP2	4355	symbol	H. sapiens	4355	H. sapiens	0.0	0.0	0.0	0.0	0.0	0.0	0.0	1.0	0.0	0.0	0.0	0.0	0.0	0.0	0.0	0.0	0.0	0.0	0.0	0.0
DPH1	1801	symbol	H. sapiens	1801	H. sapiens	0.0	0.0	0.0	0.0	0.0	0.0	0.0	0.0	0.0	0.0	0.0	0.0	0.0	0.0	0.0	0.0	0.0	0.0	0.0	0.0
IFT20	90410	symbol	H. sapiens	90410	H. sapiens	0.0	0.0	1.0	0.0	0.0	1.0	0.0	1.0	0.0	0.0	0.0	1.0	0.0	0.0	0.0	0.0	1.0	0.0	0.0	0.0
DCUN1D4	23142	symbol	H. sapiens	23142	H. sapiens	0.0	0.0	0.0	0.0	0.0	0.0	0.0	0.0	0.0	0.0	0.0	0.0	0.0	0.0	0.0	0.0	0.0	0.0	0.0	0.0
NFKB1	4790	symbol	H. sapiens	4790	H. sapiens	1.0	0.0	0.0	1.0	0.0	0.0	0.0	1.0	0.0	1.0	0.0	0.0	0.0	0.0	0.0	0.0	0.0	0.0	0.0	0.0
MAPK10	5602	symbol	H. sapiens	5602	H. sapiens	0.0	0.0	0.0	0.0	0.0	0.0	0.0	1.0	0.0	0.0	0.0	0.0	0.0	0.0	0.0	0.0	0.0	0.0	0.0	0.0
ZNF330	27309	symbol	H. sapiens	27309	H. sapiens	0.0	0.0	0.0	0.0	0.0	0.0	0.0	0.0	0.0	0.0	0.0	0.0	0.0	0.0	0.0	0.0	0.0	0.0	0.0	0.0
WFS1	7466	symbol	H. sapiens	7466	H. sapiens	0.0	0.0	0.0	0.0	0.0	0.0	0.0	1.0	0.0	0.0	0.0	0.0	0.0	1.0	0.0	0.0	0.0	0.0	0.0	0.0
TRIM2	23321	symbol	H. sapiens	23321	H. sapiens	0.0	0.0	0.0	0.0	0.0	0.0	0.0	0.0	0.0	0.0	0.0	0.0	0.0	1.0	0.0	0.0	0.0	0.0	0.0	0.0
NSD2	7468	symbol	H. sapiens	7468	H. sapiens	0.0	1.0	0.0	0.0	0.0	0.0	0.0	0.0	0.0	0.0	0.0	0.0	0.0	0.0	0.0	0.0	0.0	0.0	0.0	0.0
SH3D19	152503	symbol	H. sapiens	152503	H. sapiens	0.0	0.0	0.0	0.0	0.0	0.0	0.0	0.0	0.0	0.0	0.0	0.0	0.0	1.0	0.0	0.0	0.0	0.0	0.0	0.0
STIM2	57620	symbol	H. sapiens	57620	H. sapiens	0.0	0.0	0.0	0.0	0.0	0.0	0.0	0.0	0.0	0.0	0.0	0.0	0.0	0.0	0.0	0.0	0.0	0.0	0.0	0.0
UFSP2	55325	symbol	H. sapiens	55325	H. sapiens	0.0	0.0	0.0	0.0	0.0	0.0	0.0	0.0	0.0	0.0	0.0	0.0	0.0	0.0	0.0	0.0	0.0	0.0	0.0	0.0
KLHL5	51088	symbol	H. sapiens	51088	H. sapiens	0.0	0.0	0.0	0.0	0.0	0.0	0.0	1.0	0.0	0.0	0.0	0.0	0.0	0.0	0.0	0.0	0.0	0.0	0.0	0.0
UNC93B1	81622	symbol	H. sapiens	81622	H. sapiens	0.0	0.0	0.0	0.0	0.0	0.0	0.0	1.0	0.0	0.0	0.0	0.0	0.0	0.0	0.0	0.0	0.0	0.0	0.0	0.0
FOXRED1	55572	symbol	H. sapiens	55572	H. sapiens	0.0	0.0	0.0	0.0	0.0	0.0	0.0	0.0	0.0	0.0	0.0	0.0	0.0	0.0	0.0	0.0	0.0	0.0	1.0	0.0
PPP6R3	55291	symbol	H. sapiens	55291	H. sapiens	0.0	0.0	0.0	0.0	0.0	1.0	0.0	0.0	0.0	0.0	0.0	0.0	0.0	0.0	0.0	0.0	0.0	0.0	0.0	0.0
TMEM109	79073	symbol	H. sapiens	79073	H. sapiens	0.0	0.0	0.0	0.0	0.0	0.0	0.0	0.0	0.0	0.0	0.0	0.0	0.0	0.0	0.0	0.0	0.0	0.0	0.0	0.0
CHORDC1	26973	symbol	H. sapiens	26973	H. sapiens	0.0	0.0	0.0	0.0	1.0	0.0	0.0	0.0	0.0	0.0	0.0	1.0	0.0	0.0	0.0	0.0	0.0	0.0	0.0	0.0
PANX1	24145	symbol	H. sapiens	24145	H. sapiens	0.0	0.0	0.0	0.0	0.0	0.0	0.0	0.0	0.0	0.0	0.0	0.0	0.0	0.0	0.0	0.0	0.0	0.0	0.0	0.0
EIF4G2	1982	symbol	H. sapiens	1982	H. sapiens	0.0	0.0	0.0	0.0	1.0	0.0	0.0	0.0	0.0	0.0	0.0	0.0	0.0	0.0	0.0	0.0	1.0	0.0	0.0	0.0
GALNT18	374378	symbol	H. sapiens	374378	H. sapiens	0.0	0.0	0.0	1.0	0.0	0.0	0.0	0.0	0.0	0.0	0.0	0.0	0.0	0.0	0.0	0.0	0.0	0.0	0.0	0.0
UBE4A	9354	symbol	H. sapiens	9354	H. sapiens	0.0	0.0	0.0	0.0	0.0	0.0	0.0	0.0	0.0	0.0	0.0	0.0	0.0	1.0	0.0	0.0	0.0	0.0	0.0	0.0
FBXO3	26273	symbol	H. sapiens	26273	H. sapiens	0.0	0.0	0.0	0.0	0.0	0.0	0.0	0.0	0.0	0.0	0.0	0.0	0.0	0.0	0.0	0.0	0.0	0.0	0.0	0.0
NAA40	79829	symbol	H. sapiens	79829	H. sapiens	0.0	1.0	0.0	0.0	0.0	0.0	0.0	0.0	0.0	0.0	0.0	0.0	0.0	0.0	0.0	0.0	0.0	0.0	0.0	0.0
CD81	975	symbol	H. sapiens	975	H. sapiens	0.0	0.0	0.0	0.0	0.0	0.0	0.0	1.0	0.0	1.0	0.0	0.0	0.0	1.0	0.0	0.0	0.0	0.0	0.0	0.0
PSMD9	5715	symbol	H. sapiens	5715	H. sapiens	0.0	0.0	0.0	1.0	1.0	0.0	0.0	1.0	0.0	0.0	0.0	0.0	1.0	1.0	0.0	0.0	0.0	0.0	0.0	0.0
OGFOD2	79676	symbol	H. sapiens	79676	H. sapiens	0.0	0.0	0.0	0.0	0.0	0.0	0.0	0.0	0.0	0.0	0.0	0.0	0.0	0.0	0.0	0.0	0.0	0.0	0.0	0.0
DDX55	57696	symbol	H. sapiens	57696	H. sapiens	0.0	0.0	0.0	0.0	0.0	0.0	0.0	0.0	0.0	0.0	0.0	0.0	0.0	0.0	0.0	0.0	0.0	0.0	0.0	0.0
ADGRD1	283383	symbol	H. sapiens	283383	H. sapiens	0.0	0.0	0.0	0.0	0.0	0.0	0.0	0.0	0.0	0.0	0.0	0.0	0.0	0.0	0.0	0.0	0.0	0.0	0.0	0.0
KRR1	11103	symbol	H. sapiens	11103	H. sapiens	1.0	0.0	0.0	0.0	0.0	0.0	0.0	0.0	0.0	0.0	0.0	0.0	0.0	0.0	0.0	0.0	0.0	0.0	0.0	0.0
CDCA3	83461	symbol	H. sapiens	83461	H. sapiens	0.0	0.0	0.0	0.0	0.0	0.0	0.0	0.0	0.0	0.0	0.0	0.0	0.0	0.0	0.0	0.0	0.0	0.0	0.0	0.0
C12orf57	113246	symbol	H. sapiens	113246	H. sapiens	0.0	0.0	0.0	0.0	0.0	0.0	0.0	0.0	0.0	0.0	0.0	0.0	0.0	0.0	0.0	0.0	0.0	0.0	0.0	0.0
HCFC2	29915	symbol	H. sapiens	29915	H. sapiens	0.0	0.0	0.0	0.0	0.0	0.0	0.0	0.0	0.0	0.0	0.0	0.0	0.0	0.0	0.0	0.0	0.0	0.0	0.0	0.0
RBM24	221662	symbol	H. sapiens	221662	H. sapiens	0.0	0.0	0.0	1.0	0.0	0.0	0.0	1.0	1.0	0.0	0.0	0.0	0.0	0.0	0.0	0.0	0.0	0.0	0.0	0.0
CAP2	10486	symbol	H. sapiens	10486	H. sapiens	0.0	0.0	0.0	0.0	0.0	0.0	0.0	0.0	0.0	0.0	0.0	0.0	0.0	0.0	0.0	0.0	0.0	1.0	0.0	0.0
B3GAT2	135152	symbol	H. sapiens	135152	H. sapiens	0.0	0.0	0.0	1.0	0.0	0.0	0.0	0.0	0.0	0.0	0.0	0.0	0.0	0.0	0.0	0.0	0.0	0.0	0.0	0.0
HBS1L	10767	symbol	H. sapiens	10767	H. sapiens	0.0	0.0	0.0	1.0	0.0	0.0	0.0	0.0	0.0	0.0	0.0	0.0	0.0	0.0	0.0	0.0	0.0	0.0	0.0	0.0
PHF1	5252	symbol	H. sapiens	5252	H. sapiens	0.0	1.0	0.0	0.0	0.0	0.0	0.0	0.0	0.0	0.0	0.0	0.0	0.0	0.0	0.0	0.0	0.0	0.0	0.0	0.0
FAM120B	84498	symbol	H. sapiens	84498	H. sapiens	0.0	0.0	0.0	0.0	0.0	0.0	0.0	0.0	0.0	0.0	0.0	0.0	0.0	0.0	0.0	0.0	0.0	0.0	0.0	0.0
MRPL2	51069	symbol	H. sapiens	51069	H. sapiens	0.0	0.0	0.0	0.0	0.0	0.0	0.0	0.0	0.0	0.0	0.0	0.0	0.0	0.0	0.0	0.0	0.0	0.0	0.0	0.0
PRPF4B	8899	symbol	H. sapiens	8899	H. sapiens	0.0	0.0	0.0	0.0	0.0	0.0	0.0	0.0	1.0	0.0	0.0	0.0	0.0	0.0	0.0	0.0	0.0	0.0	0.0	0.0
PRSS16	10279	symbol	H. sapiens	10279	H. sapiens	0.0	0.0	0.0	0.0	0.0	0.0	0.0	0.0	0.0	0.0	0.0	0.0	0.0	0.0	0.0	0.0	0.0	0.0	0.0	0.0
NUDT12	83594	symbol	H. sapiens	83594	H. sapiens	0.0	0.0	0.0	1.0	0.0	0.0	0.0	0.0	0.0	0.0	0.0	0.0	0.0	0.0	0.0	0.0	0.0	0.0	0.0	0.0
PFDN1	5201	symbol	H. sapiens	5201	H. sapiens	0.0	0.0	0.0	0.0	0.0	0.0	0.0	0.0	0.0	0.0	0.0	0.0	0.0	0.0	0.0	0.0	0.0	0.0	0.0	0.0
CLK4	57396	symbol	H. sapiens	57396	H. sapiens	0.0	0.0	0.0	0.0	0.0	0.0	0.0	0.0	1.0	0.0	0.0	0.0	0.0	0.0	0.0	0.0	0.0	0.0	0.0	0.0
TRAPPC13	80006	symbol	H. sapiens	80006	H. sapiens	0.0	0.0	0.0	0.0	0.0	0.0	0.0	0.0	0.0	0.0	0.0	0.0	0.0	0.0	0.0	0.0	0.0	0.0	0.0	0.0
H2AFY	9555	gene_synonym	H. sapiens	9555	H. sapiens	1.0	1.0	0.0	0.0	1.0	0.0	0.0	1.0	0.0	0.0	0.0	0.0	0.0	0.0	0.0	0.0	0.0	0.0	1.0	0.0
SMAD5	4090	symbol	H. sapiens	4090	H. sapiens	0.0	0.0	0.0	0.0	0.0	0.0	0.0	0.0	0.0	0.0	0.0	0.0	0.0	0.0	0.0	0.0	0.0	0.0	0.0	0.0
CSNK1A1	1452	symbol	H. sapiens	1452	H. sapiens	0.0	0.0	0.0	0.0	0.0	0.0	0.0	1.0	0.0	0.0	0.0	0.0	0.0	1.0	0.0	0.0	0.0	0.0	0.0	0.0
ZNF346	23567	symbol	H. sapiens	23567	H. sapiens	0.0	0.0	0.0	0.0	0.0	0.0	0.0	0.0	0.0	0.0	0.0	0.0	0.0	0.0	0.0	0.0	0.0	0.0	0.0	0.0
SMC4	10051	symbol	H. sapiens	10051	H. sapiens	0.0	0.0	0.0	0.0	0.0	0.0	0.0	0.0	0.0	0.0	0.0	0.0	0.0	0.0	0.0	0.0	0.0	0.0	0.0	0.0
TIMMDC1	51300	symbol	H. sapiens	51300	H. sapiens	0.0	0.0	0.0	0.0	0.0	0.0	0.0	0.0	0.0	0.0	0.0	0.0	0.0	0.0	0.0	0.0	0.0	0.0	1.0	0.0
BCL6	604	symbol	H. sapiens	604	H. sapiens	0.0	1.0	0.0	0.0	1.0	0.0	1.0	1.0	0.0	0.0	0.0	0.0	0.0	0.0	0.0	0.0	0.0	1.0	0.0	0.0
USP4	7375	symbol	H. sapiens	7375	H. sapiens	1.0	0.0	0.0	0.0	0.0	0.0	0.0	1.0	1.0	0.0	0.0	0.0	0.0	1.0	0.0	0.0	0.0	0.0	0.0	0.0
SNX4	8723	symbol	H. sapiens	8723	H. sapiens	0.0	0.0	0.0	0.0	0.0	1.0	0.0	1.0	0.0	0.0	0.0	0.0	0.0	0.0	0.0	0.0	0.0	0.0	0.0	0.0
CISH	1154	symbol	H. sapiens	1154	H. sapiens	0.0	0.0	0.0	0.0	0.0	0.0	0.0	1.0	0.0	1.0	0.0	0.0	0.0	0.0	0.0	0.0	0.0	0.0	0.0	0.0
NKTR	4820	symbol	H. sapiens	4820	H. sapiens	0.0	0.0	0.0	0.0	0.0	0.0	0.0	0.0	0.0	0.0	0.0	0.0	0.0	0.0	0.0	0.0	0.0	0.0	0.0	0.0
CLCN2	1181	symbol	H. sapiens	1181	H. sapiens	0.0	0.0	0.0	0.0	0.0	0.0	0.0	1.0	0.0	1.0	0.0	0.0	0.0	0.0	0.0	0.0	0.0	0.0	0.0	0.0
EIF4G1	1981	symbol	H. sapiens	1981	H. sapiens	0.0	0.0	0.0	1.0	1.0	0.0	0.0	1.0	0.0	0.0	0.0	0.0	0.0	0.0	0.0	0.0	1.0	0.0	1.0	0.0
DNAJC27	51277	symbol	H. sapiens	51277	H. sapiens	0.0	0.0	0.0	0.0	0.0	0.0	0.0	0.0	0.0	0.0	0.0	0.0	0.0	0.0	0.0	0.0	0.0	0.0	0.0	0.0
GPD2	2820	symbol	H. sapiens	2820	H. sapiens	0.0	0.0	0.0	1.0	0.0	0.0	0.0	1.0	0.0	0.0	0.0	0.0	0.0	0.0	0.0	0.0	0.0	0.0	0.0	0.0
CENPA	1058	symbol	H. sapiens	1058	H. sapiens	0.0	0.0	0.0	0.0	0.0	1.0	0.0	0.0	0.0	0.0	0.0	1.0	0.0	0.0	0.0	0.0	0.0	0.0	0.0	0.0
NRBP1	29959	symbol	H. sapiens	29959	H. sapiens	0.0	0.0	0.0	0.0	0.0	0.0	0.0	0.0	0.0	0.0	0.0	0.0	0.0	0.0	0.0	0.0	0.0	0.0	0.0	0.0
ITGB6	3694	symbol	H. sapiens	3694	H. sapiens	0.0	0.0	0.0	0.0	0.0	0.0	0.0	0.0	0.0	0.0	0.0	0.0	0.0	0.0	0.0	0.0	0.0	0.0	0.0	0.0
PSMD14	10213	symbol	H. sapiens	10213	H. sapiens	0.0	0.0	0.0	1.0	1.0	0.0	1.0	1.0	0.0	0.0	0.0	0.0	1.0	1.0	0.0	0.0	0.0	0.0	0.0	0.0
SNX17	9784	symbol	H. sapiens	9784	H. sapiens	0.0	0.0	0.0	1.0	0.0	0.0	0.0	0.0	0.0	0.0	0.0	0.0	0.0	0.0	0.0	0.0	0.0	0.0	0.0	0.0
HTRA2	27429	symbol	H. sapiens	27429	H. sapiens	0.0	0.0	0.0	0.0	1.0	0.0	1.0	0.0	0.0	0.0	0.0	0.0	0.0	1.0	0.0	0.0	1.0	0.0	1.0	1.0
LANCL1	10314	symbol	H. sapiens	10314	H. sapiens	0.0	0.0	0.0	0.0	0.0	0.0	0.0	0.0	0.0	0.0	0.0	0.0	0.0	0.0	0.0	0.0	0.0	0.0	0.0	0.0
PAPOLG	64895	symbol	H. sapiens	64895	H. sapiens	0.0	0.0	0.0	0.0	0.0	0.0	0.0	0.0	1.0	0.0	0.0	0.0	0.0	0.0	0.0	0.0	0.0	0.0	0.0	0.0
EHBP1	23301	symbol	H. sapiens	23301	H. sapiens	0.0	0.0	0.0	0.0	0.0	0.0	0.0	0.0	0.0	0.0	0.0	0.0	0.0	0.0	0.0	0.0	0.0	0.0	0.0	0.0
MLPH	79083	symbol	H. sapiens	79083	H. sapiens	0.0	0.0	0.0	0.0	0.0	1.0	0.0	0.0	0.0	0.0	0.0	0.0	0.0	0.0	0.0	0.0	0.0	0.0	0.0	0.0
NOL10	79954	symbol	H. sapiens	79954	H. sapiens	1.0	0.0	0.0	0.0	0.0	0.0	0.0	0.0	0.0	0.0	0.0	0.0	0.0	0.0	0.0	0.0	0.0	0.0	0.0	0.0
DCAF17	80067	symbol	H. sapiens	80067	H. sapiens	0.0	0.0	0.0	0.0	0.0	0.0	0.0	1.0	0.0	0.0	0.0	0.0	0.0	0.0	0.0	0.0	0.0	0.0	0.0	0.0
SLC25A12	8604	symbol	H. sapiens	8604	H. sapiens	0.0	0.0	0.0	1.0	0.0	0.0	0.0	1.0	0.0	0.0	0.0	0.0	1.0	0.0	0.0	0.0	0.0	0.0	1.0	0.0
DARS	1615	gene_synonym	H. sapiens	1615	H. sapiens	1.0	0.0	0.0	0.0	0.0	0.0	0.0	0.0	0.0	0.0	0.0	0.0	1.0	0.0	0.0	1.0	0.0	0.0	0.0	0.0
SLC1A4	6509	symbol	H. sapiens	6509	H. sapiens	0.0	0.0	0.0	0.0	0.0	0.0	0.0	0.0	0.0	0.0	0.0	0.0	0.0	0.0	0.0	0.0	0.0	0.0	0.0	0.0
WIPF1	7456	symbol	H. sapiens	7456	H. sapiens	0.0	0.0	0.0	0.0	0.0	0.0	0.0	1.0	0.0	0.0	0.0	0.0	0.0	0.0	0.0	0.0	0.0	1.0	0.0	0.0
SUMO1	7341	symbol	H. sapiens	7341	H. sapiens	0.0	1.0	0.0	0.0	0.0	0.0	1.0	1.0	0.0	0.0	0.0	0.0	0.0	1.0	0.0	0.0	0.0	1.0	0.0	0.0
LRRC42	115353	symbol	H. sapiens	115353	H. sapiens	0.0	0.0	0.0	0.0	0.0	0.0	0.0	0.0	0.0	0.0	0.0	0.0	0.0	0.0	0.0	0.0	0.0	0.0	0.0	0.0
KIAA1324	57535	symbol	H. sapiens	57535	H. sapiens	0.0	0.0	0.0	0.0	0.0	0.0	0.0	0.0	0.0	0.0	0.0	0.0	0.0	0.0	0.0	0.0	1.0	0.0	0.0	0.0
MECR	51102	symbol	H. sapiens	51102	H. sapiens	0.0	0.0	0.0	1.0	0.0	0.0	0.0	0.0	0.0	1.0	0.0	0.0	0.0	0.0	0.0	0.0	0.0	0.0	0.0	0.0
S100PBP	64766	symbol	H. sapiens	64766	H. sapiens	0.0	0.0	0.0	0.0	0.0	0.0	0.0	0.0	0.0	0.0	0.0	0.0	0.0	0.0	0.0	0.0	0.0	0.0	0.0	0.0
SCAMP3	10067	symbol	H. sapiens	10067	H. sapiens	0.0	0.0	0.0	0.0	0.0	0.0	0.0	0.0	0.0	0.0	0.0	0.0	0.0	0.0	0.0	0.0	0.0	0.0	0.0	0.0
SFPQ	6421	symbol	H. sapiens	6421	H. sapiens	0.0	1.0	0.0	0.0	1.0	0.0	0.0	1.0	1.0	0.0	0.0	1.0	0.0	0.0	0.0	0.0	0.0	0.0	0.0	0.0
MFN2	9927	symbol	H. sapiens	9927	H. sapiens	0.0	0.0	0.0	0.0	1.0	1.0	0.0	0.0	0.0	0.0	0.0	0.0	0.0	0.0	0.0	0.0	1.0	0.0	1.0	1.0
ZBTB17	7709	symbol	H. sapiens	7709	H. sapiens	0.0	0.0	0.0	0.0	1.0	0.0	0.0	0.0	0.0	0.0	0.0	0.0	0.0	0.0	0.0	0.0	0.0	0.0	0.0	0.0
CD58	965	symbol	H. sapiens	965	H. sapiens	0.0	0.0	0.0	0.0	0.0	0.0	0.0	1.0	0.0	0.0	0.0	0.0	0.0	0.0	0.0	0.0	0.0	0.0	0.0	0.0
WARS2	10352	symbol	H. sapiens	10352	H. sapiens	1.0	0.0	0.0	0.0	0.0	0.0	0.0	0.0	0.0	0.0	0.0	0.0	1.0	0.0	1.0	1.0	0.0	0.0	0.0	0.0
RRAGC	64121	symbol	H. sapiens	64121	H. sapiens	0.0	0.0	0.0	0.0	1.0	0.0	0.0	0.0	1.0	0.0	0.0	0.0	0.0	0.0	0.0	0.0	1.0	0.0	0.0	0.0
KMO	8564	symbol	H. sapiens	8564	H. sapiens	0.0	0.0	0.0	1.0	0.0	0.0	0.0	1.0	0.0	0.0	0.0	0.0	1.0	0.0	0.0	0.0	0.0	0.0	0.0	0.0
GBP1	2633	symbol	H. sapiens	2633	H. sapiens	0.0	0.0	0.0	0.0	0.0	0.0	0.0	1.0	0.0	0.0	0.0	0.0	0.0	0.0	0.0	0.0	0.0	0.0	0.0	0.0
GPR89A	653519	symbol	H. sapiens	653519	H. sapiens	0.0	0.0	0.0	0.0	0.0	0.0	0.0	0.0	0.0	0.0	0.0	0.0	0.0	0.0	0.0	0.0	0.0	0.0	0.0	0.0
TMED5	50999	symbol	H. sapiens	50999	H. sapiens	0.0	0.0	0.0	0.0	0.0	0.0	0.0	0.0	0.0	0.0	0.0	0.0	0.0	0.0	0.0	0.0	0.0	0.0	0.0	0.0
ABCD3	5825	symbol	H. sapiens	5825	H. sapiens	0.0	0.0	0.0	1.0	0.0	0.0	0.0	0.0	0.0	1.0	0.0	0.0	0.0	0.0	0.0	0.0	0.0	0.0	0.0	0.0
RCOR3	55758	symbol	H. sapiens	55758	H. sapiens	0.0	0.0	0.0	0.0	0.0	0.0	0.0	0.0	0.0	0.0	0.0	0.0	0.0	0.0	0.0	0.0	0.0	0.0	0.0	0.0
RPS6KA1	6195	symbol	H. sapiens	6195	H. sapiens	0.0	0.0	0.0	0.0	0.0	0.0	0.0	1.0	0.0	0.0	0.0	0.0	0.0	0.0	0.0	0.0	0.0	0.0	0.0	0.0
DHDDS	79947	symbol	H. sapiens	79947	H. sapiens	0.0	0.0	0.0	1.0	0.0	0.0	0.0	0.0	0.0	1.0	0.0	0.0	0.0	0.0	0.0	0.0	0.0	0.0	0.0	0.0
STAG1	10274	symbol	H. sapiens	10274	H. sapiens	0.0	0.0	0.0	0.0	1.0	0.0	0.0	0.0	0.0	0.0	0.0	1.0	0.0	0.0	0.0	0.0	0.0	0.0	0.0	0.0
KMT2A	4297	symbol	H. sapiens	4297	H. sapiens	0.0	1.0	0.0	0.0	0.0	0.0	0.0	1.0	0.0	0.0	0.0	0.0	0.0	0.0	0.0	0.0	0.0	0.0	0.0	0.0
KLF7	8609	symbol	H. sapiens	8609	H. sapiens	0.0	0.0	0.0	0.0	0.0	0.0	0.0	0.0	0.0	0.0	0.0	0.0	0.0	0.0	0.0	0.0	0.0	0.0	0.0	0.0
SLC16A7	9194	symbol	H. sapiens	9194	H. sapiens	0.0	0.0	0.0	0.0	0.0	0.0	0.0	0.0	0.0	0.0	0.0	0.0	0.0	0.0	0.0	0.0	0.0	0.0	0.0	0.0
RAB3GAP2	25782	symbol	H. sapiens	25782	H. sapiens	0.0	0.0	0.0	0.0	0.0	0.0	1.0	0.0	0.0	1.0	0.0	0.0	0.0	0.0	0.0	0.0	1.0	0.0	1.0	0.0
LDAH	60526	symbol	H. sapiens	60526	H. sapiens	0.0	0.0	0.0	0.0	0.0	0.0	0.0	0.0	0.0	0.0	0.0	0.0	0.0	0.0	0.0	0.0	0.0	0.0	0.0	0.0
CYP20A1	57404	symbol	H. sapiens	57404	H. sapiens	0.0	0.0	0.0	0.0	0.0	0.0	0.0	0.0	0.0	0.0	0.0	0.0	0.0	0.0	0.0	0.0	0.0	0.0	0.0	0.0
NEK6	10783	symbol	H. sapiens	10783	H. sapiens	0.0	1.0	0.0	0.0	1.0	0.0	0.0	0.0	0.0	0.0	0.0	1.0	0.0	0.0	0.0	0.0	0.0	0.0	0.0	0.0
HSDL2	84263	symbol	H. sapiens	84263	H. sapiens	0.0	0.0	0.0	0.0	0.0	0.0	0.0	0.0	0.0	0.0	0.0	0.0	0.0	0.0	0.0	0.0	0.0	0.0	0.0	0.0
DENND1A	57706	symbol	H. sapiens	57706	H. sapiens	0.0	0.0	0.0	0.0	0.0	0.0	1.0	0.0	0.0	0.0	0.0	0.0	0.0	0.0	0.0	0.0	0.0	0.0	0.0	0.0
C19orf25	148223	symbol	H. sapiens	148223	H. sapiens	0.0	0.0	0.0	0.0	0.0	0.0	0.0	0.0	0.0	0.0	0.0	0.0	0.0	0.0	0.0	0.0	0.0	0.0	0.0	0.0
FLVCR2	55640	symbol	H. sapiens	55640	H. sapiens	0.0	0.0	0.0	0.0	0.0	0.0	0.0	0.0	0.0	0.0	0.0	0.0	0.0	0.0	0.0	0.0	0.0	0.0	0.0	0.0
ZNF410	57862	symbol	H. sapiens	57862	H. sapiens	0.0	0.0	0.0	0.0	0.0	0.0	0.0	0.0	0.0	0.0	0.0	0.0	0.0	0.0	0.0	0.0	0.0	0.0	0.0	0.0
TMEM214	54867	symbol	H. sapiens	54867	H. sapiens	0.0	0.0	0.0	0.0	0.0	0.0	0.0	0.0	0.0	0.0	0.0	0.0	0.0	0.0	0.0	0.0	0.0	0.0	0.0	0.0
ATAD2B	54454	symbol	H. sapiens	54454	H. sapiens	0.0	1.0	0.0	0.0	0.0	0.0	0.0	0.0	0.0	0.0	0.0	0.0	0.0	0.0	0.0	0.0	0.0	0.0	0.0	0.0
ATL2	64225	symbol	H. sapiens	64225	H. sapiens	0.0	0.0	0.0	0.0	0.0	0.0	0.0	0.0	0.0	0.0	0.0	0.0	0.0	0.0	0.0	0.0	0.0	0.0	0.0	0.0
TCTN3	26123	symbol	H. sapiens	26123	H. sapiens	0.0	0.0	1.0	0.0	0.0	1.0	0.0	0.0	0.0	0.0	0.0	0.0	0.0	0.0	0.0	0.0	0.0	0.0	0.0	0.0
KANSL1	284058	symbol	H. sapiens	284058	H. sapiens	0.0	1.0	0.0	0.0	0.0	0.0	0.0	0.0	0.0	0.0	0.0	0.0	0.0	0.0	0.0	0.0	0.0	0.0	0.0	0.0
HOXB3	3213	symbol	H. sapiens	3213	H. sapiens	0.0	0.0	0.0	0.0	0.0	0.0	0.0	1.0	0.0	0.0	0.0	0.0	0.0	0.0	0.0	0.0	0.0	0.0	0.0	0.0
SLC10A7	84068	symbol	H. sapiens	84068	H. sapiens	0.0	0.0	0.0	0.0	0.0	0.0	0.0	0.0	0.0	0.0	0.0	0.0	0.0	0.0	0.0	0.0	0.0	0.0	0.0	0.0
CCDC77	84318	symbol	H. sapiens	84318	H. sapiens	0.0	0.0	0.0	0.0	0.0	0.0	0.0	0.0	0.0	0.0	0.0	0.0	0.0	0.0	0.0	0.0	0.0	0.0	0.0	0.0
ELF1	1997	symbol	H. sapiens	1997	H. sapiens	0.0	0.0	0.0	0.0	0.0	0.0	0.0	1.0	0.0	0.0	0.0	0.0	0.0	0.0	0.0	0.0	0.0	0.0	0.0	0.0
PLS1	5357	symbol	H. sapiens	5357	H. sapiens	0.0	0.0	0.0	0.0	0.0	0.0	0.0	0.0	0.0	0.0	0.0	0.0	0.0	0.0	0.0	0.0	0.0	1.0	0.0	0.0
UTP20	27340	symbol	H. sapiens	27340	H. sapiens	1.0	0.0	0.0	0.0	0.0	0.0	0.0	0.0	0.0	0.0	0.0	0.0	0.0	0.0	0.0	0.0	0.0	0.0	0.0	0.0
SOCS2	8835	symbol	H. sapiens	8835	H. sapiens	0.0	0.0	0.0	0.0	0.0	0.0	0.0	1.0	0.0	1.0	0.0	0.0	0.0	0.0	0.0	0.0	0.0	0.0	0.0	0.0
SPOP	8405	symbol	H. sapiens	8405	H. sapiens	0.0	0.0	0.0	0.0	0.0	0.0	0.0	0.0	0.0	0.0	0.0	0.0	0.0	1.0	0.0	0.0	0.0	0.0	0.0	0.0
TEX14	56155	symbol	H. sapiens	56155	H. sapiens	0.0	1.0	0.0	0.0	1.0	0.0	0.0	0.0	0.0	0.0	0.0	0.0	0.0	0.0	0.0	0.0	0.0	0.0	0.0	0.0
CEP89	84902	symbol	H. sapiens	84902	H. sapiens	0.0	0.0	1.0	0.0	0.0	1.0	0.0	0.0	0.0	0.0	1.0	0.0	0.0	0.0	0.0	0.0	0.0	0.0	1.0	0.0
RNF2	6045	symbol	H. sapiens	6045	H. sapiens	0.0	1.0	0.0	0.0	1.0	0.0	0.0	0.0	0.0	0.0	0.0	0.0	0.0	0.0	0.0	0.0	0.0	0.0	0.0	0.0
CSTA	1475	symbol	H. sapiens	1475	H. sapiens	0.0	0.0	0.0	0.0	0.0	0.0	0.0	0.0	0.0	0.0	0.0	0.0	0.0	0.0	0.0	0.0	0.0	0.0	0.0	0.0
CRY2	1408	symbol	H. sapiens	1408	H. sapiens	0.0	0.0	0.0	0.0	0.0	0.0	0.0	0.0	0.0	0.0	0.0	0.0	0.0	0.0	0.0	0.0	0.0	0.0	0.0	0.0
ZRANB3	84083	symbol	H. sapiens	84083	H. sapiens	0.0	0.0	0.0	0.0	0.0	0.0	0.0	0.0	0.0	0.0	0.0	0.0	0.0	0.0	0.0	0.0	0.0	0.0	0.0	0.0
ACVR2A	92	symbol	H. sapiens	92	H. sapiens	0.0	0.0	0.0	0.0	0.0	0.0	0.0	0.0	0.0	0.0	0.0	0.0	0.0	0.0	0.0	0.0	0.0	0.0	0.0	0.0
MTERF4	130916	symbol	H. sapiens	130916	H. sapiens	1.0	1.0	0.0	0.0	0.0	0.0	0.0	0.0	1.0	0.0	0.0	0.0	0.0	0.0	1.0	1.0	0.0	0.0	1.0	0.0
KIAA1191	57179	symbol	H. sapiens	57179	H. sapiens	0.0	0.0	0.0	0.0	0.0	0.0	0.0	0.0	0.0	0.0	0.0	0.0	0.0	0.0	0.0	0.0	0.0	0.0	0.0	0.0
INHBA	3624	symbol	H. sapiens	3624	H. sapiens	0.0	0.0	0.0	0.0	1.0	0.0	0.0	1.0	0.0	0.0	0.0	0.0	0.0	0.0	0.0	0.0	0.0	0.0	0.0	0.0
CCZ1	51622	symbol	H. sapiens	51622	H. sapiens	0.0	0.0	0.0	0.0	0.0	0.0	0.0	0.0	0.0	0.0	0.0	0.0	0.0	0.0	0.0	0.0	0.0	0.0	0.0	0.0
ECD	11319	symbol	H. sapiens	11319	H. sapiens	0.0	0.0	0.0	1.0	1.0	0.0	0.0	1.0	1.0	0.0	0.0	0.0	0.0	0.0	0.0	0.0	0.0	0.0	0.0	0.0
IFT81	28981	symbol	H. sapiens	28981	H. sapiens	0.0	0.0	1.0	0.0	0.0	0.0	0.0	0.0	0.0	0.0	0.0	1.0	0.0	0.0	0.0	0.0	0.0	0.0	0.0	0.0
CDKN2C	1031	symbol	H. sapiens	1031	H. sapiens	0.0	0.0	0.0	0.0	1.0	0.0	0.0	0.0	0.0	0.0	0.0	0.0	0.0	0.0	0.0	0.0	0.0	0.0	0.0	0.0
SPRYD7	57213	symbol	H. sapiens	57213	H. sapiens	0.0	0.0	0.0	0.0	0.0	0.0	0.0	0.0	0.0	0.0	0.0	0.0	0.0	0.0	0.0	0.0	0.0	0.0	0.0	0.0
ATP7B	540	symbol	H. sapiens	540	H. sapiens	0.0	0.0	0.0	0.0	0.0	0.0	0.0	0.0	0.0	0.0	0.0	0.0	0.0	0.0	0.0	0.0	0.0	0.0	0.0	0.0
MMP19	4327	symbol	H. sapiens	4327	H. sapiens	0.0	0.0	0.0	0.0	0.0	0.0	0.0	0.0	0.0	0.0	0.0	0.0	0.0	0.0	0.0	0.0	0.0	0.0	0.0	0.0
PFDN5	5204	symbol	H. sapiens	5204	H. sapiens	0.0	0.0	0.0	0.0	0.0	0.0	0.0	1.0	0.0	0.0	0.0	0.0	0.0	0.0	0.0	0.0	0.0	0.0	0.0	0.0
IKZF4	64375	symbol	H. sapiens	64375	H. sapiens	0.0	0.0	0.0	0.0	0.0	0.0	0.0	0.0	0.0	0.0	0.0	0.0	0.0	0.0	0.0	0.0	0.0	0.0	0.0	0.0
STIL	6491	symbol	H. sapiens	6491	H. sapiens	0.0	0.0	0.0	0.0	1.0	0.0	0.0	0.0	0.0	0.0	1.0	1.0	0.0	0.0	0.0	0.0	0.0	0.0	0.0	0.0
PLA2G12A	81579	symbol	H. sapiens	81579	H. sapiens	0.0	0.0	0.0	1.0	0.0	0.0	0.0	0.0	0.0	1.0	0.0	0.0	1.0	0.0	0.0	0.0	0.0	0.0	0.0	0.0
PFKFB2	5208	symbol	H. sapiens	5208	H. sapiens	0.0	0.0	0.0	1.0	0.0	0.0	0.0	1.0	0.0	0.0	0.0	0.0	0.0	0.0	0.0	0.0	0.0	0.0	0.0	0.0
ENKD1	84080	symbol	H. sapiens	84080	H. sapiens	0.0	0.0	0.0	0.0	0.0	0.0	0.0	0.0	0.0	0.0	0.0	0.0	0.0	0.0	0.0	0.0	0.0	0.0	0.0	0.0
SNX21	90203	symbol	H. sapiens	90203	H. sapiens	0.0	0.0	0.0	0.0	0.0	0.0	0.0	0.0	0.0	0.0	0.0	0.0	0.0	0.0	0.0	0.0	0.0	0.0	0.0	0.0
PIGT	51604	symbol	H. sapiens	51604	H. sapiens	0.0	0.0	0.0	1.0	0.0	0.0	0.0	0.0	0.0	1.0	0.0	0.0	0.0	0.0	0.0	0.0	0.0	0.0	0.0	0.0
STX16	8675	symbol	H. sapiens	8675	H. sapiens	0.0	0.0	1.0	0.0	0.0	1.0	0.0	0.0	0.0	0.0	0.0	0.0	0.0	0.0	0.0	0.0	0.0	0.0	0.0	0.0
IQSEC2	23096	symbol	H. sapiens	23096	H. sapiens	0.0	0.0	0.0	0.0	0.0	0.0	0.0	0.0	0.0	0.0	0.0	0.0	0.0	0.0	0.0	0.0	0.0	1.0	0.0	0.0
ABCC10	89845	symbol	H. sapiens	89845	H. sapiens	0.0	0.0	0.0	0.0	0.0	0.0	0.0	0.0	0.0	0.0	0.0	0.0	0.0	0.0	0.0	0.0	0.0	0.0	0.0	0.0
PEX6	5190	symbol	H. sapiens	5190	H. sapiens	0.0	0.0	0.0	0.0	0.0	0.0	0.0	0.0	0.0	0.0	0.0	0.0	0.0	0.0	0.0	0.0	0.0	0.0	1.0	0.0
AARS2	57505	symbol	H. sapiens	57505	H. sapiens	1.0	0.0	0.0	0.0	0.0	0.0	0.0	0.0	0.0	0.0	0.0	0.0	1.0	0.0	1.0	1.0	0.0	0.0	1.0	0.0
SPDEF	25803	symbol	H. sapiens	25803	H. sapiens	0.0	0.0	0.0	0.0	0.0	0.0	0.0	0.0	0.0	0.0	0.0	0.0	0.0	0.0	0.0	0.0	0.0	0.0	0.0	0.0
KLHL31	401265	symbol	H. sapiens	401265	H. sapiens	0.0	0.0	0.0	0.0	0.0	0.0	0.0	0.0	0.0	0.0	0.0	0.0	0.0	0.0	0.0	0.0	0.0	0.0	0.0	0.0
TMTC4	84899	symbol	H. sapiens	84899	H. sapiens	0.0	0.0	0.0	1.0	0.0	0.0	0.0	0.0	0.0	0.0	0.0	0.0	0.0	0.0	0.0	0.0	0.0	0.0	0.0	0.0
MRPS7	51081	symbol	H. sapiens	51081	H. sapiens	1.0	0.0	0.0	0.0	0.0	0.0	0.0	0.0	1.0	0.0	0.0	0.0	0.0	0.0	0.0	0.0	0.0	0.0	0.0	0.0
PSD4	23550	symbol	H. sapiens	23550	H. sapiens	0.0	0.0	0.0	0.0	0.0	0.0	0.0	0.0	0.0	0.0	0.0	0.0	0.0	0.0	0.0	0.0	0.0	0.0	0.0	0.0
SYMPK	8189	symbol	H. sapiens	8189	H. sapiens	0.0	0.0	0.0	0.0	0.0	0.0	0.0	0.0	1.0	0.0	0.0	0.0	0.0	0.0	0.0	0.0	0.0	0.0	0.0	0.0
AP5S1	55317	symbol	H. sapiens	55317	H. sapiens	0.0	0.0	0.0	0.0	0.0	0.0	0.0	0.0	0.0	0.0	0.0	0.0	0.0	0.0	0.0	0.0	0.0	0.0	0.0	0.0
RRBP1	6238	symbol	H. sapiens	6238	H. sapiens	0.0	0.0	0.0	0.0	0.0	0.0	0.0	0.0	0.0	0.0	0.0	0.0	0.0	0.0	0.0	0.0	0.0	0.0	0.0	0.0
NCLN	56926	symbol	H. sapiens	56926	H. sapiens	0.0	0.0	0.0	0.0	0.0	0.0	0.0	0.0	0.0	0.0	0.0	0.0	0.0	0.0	0.0	0.0	0.0	0.0	0.0	0.0
FRMD8	83786	symbol	H. sapiens	83786	H. sapiens	0.0	0.0	0.0	0.0	0.0	0.0	0.0	0.0	0.0	0.0	0.0	0.0	0.0	0.0	0.0	0.0	0.0	0.0	0.0	0.0
BCL2L12	83596	symbol	H. sapiens	83596	H. sapiens	0.0	0.0	0.0	0.0	0.0	0.0	0.0	0.0	0.0	0.0	0.0	0.0	0.0	0.0	0.0	0.0	0.0	0.0	0.0	0.0
PCNX4	64430	symbol	H. sapiens	64430	H. sapiens	0.0	0.0	0.0	0.0	0.0	0.0	0.0	0.0	0.0	0.0	0.0	0.0	0.0	0.0	0.0	0.0	0.0	0.0	0.0	0.0
NUP214	8021	symbol	H. sapiens	8021	H. sapiens	0.0	1.0	0.0	1.0	0.0	0.0	0.0	1.0	0.0	0.0	0.0	0.0	0.0	0.0	0.0	0.0	0.0	0.0	1.0	0.0
MAP2K2	5605	symbol	H. sapiens	5605	H. sapiens	0.0	0.0	0.0	0.0	0.0	0.0	0.0	0.0	0.0	0.0	0.0	0.0	0.0	0.0	0.0	0.0	0.0	0.0	0.0	0.0
INTS11	54973	symbol	H. sapiens	54973	H. sapiens	1.0	0.0	0.0	0.0	0.0	0.0	0.0	0.0	0.0	0.0	0.0	0.0	0.0	0.0	0.0	0.0	0.0	0.0	0.0	0.0
FBXL12	54850	symbol	H. sapiens	54850	H. sapiens	0.0	0.0	0.0	0.0	1.0	0.0	0.0	1.0	0.0	0.0	0.0	0.0	0.0	1.0	0.0	0.0	0.0	0.0	0.0	0.0
SIN3B	23309	symbol	H. sapiens	23309	H. sapiens	0.0	1.0	0.0	0.0	0.0	0.0	0.0	0.0	0.0	0.0	0.0	0.0	0.0	0.0	0.0	0.0	0.0	0.0	0.0	0.0
PKMYT1	9088	symbol	H. sapiens	9088	H. sapiens	0.0	0.0	0.0	0.0	1.0	0.0	0.0	0.0	0.0	0.0	0.0	0.0	0.0	0.0	0.0	0.0	0.0	0.0	0.0	0.0
HIP1	3092	symbol	H. sapiens	3092	H. sapiens	0.0	0.0	0.0	0.0	0.0	0.0	1.0	0.0	0.0	0.0	0.0	0.0	0.0	0.0	0.0	0.0	0.0	1.0	0.0	0.0
STYXL1	51657	symbol	H. sapiens	51657	H. sapiens	1.0	0.0	0.0	0.0	0.0	0.0	0.0	0.0	1.0	0.0	0.0	0.0	0.0	0.0	0.0	0.0	0.0	0.0	0.0	0.0
PEX1	5189	symbol	H. sapiens	5189	H. sapiens	0.0	0.0	0.0	0.0	0.0	1.0	0.0	0.0	0.0	0.0	0.0	1.0	0.0	0.0	0.0	0.0	0.0	0.0	1.0	0.0
ADORA2A	135	symbol	H. sapiens	135	H. sapiens	0.0	0.0	0.0	0.0	0.0	1.0	0.0	1.0	0.0	0.0	0.0	0.0	0.0	0.0	0.0	0.0	0.0	0.0	0.0	0.0
MPST	4357	symbol	H. sapiens	4357	H. sapiens	0.0	0.0	0.0	1.0	0.0	0.0	0.0	0.0	0.0	0.0	0.0	0.0	1.0	0.0	0.0	0.0	0.0	0.0	0.0	0.0
KRT17	3872	symbol	H. sapiens	3872	H. sapiens	0.0	0.0	0.0	0.0	0.0	0.0	0.0	0.0	0.0	0.0	0.0	0.0	0.0	0.0	0.0	0.0	0.0	0.0	0.0	0.0
LSM8	51691	symbol	H. sapiens	51691	H. sapiens	0.0	0.0	0.0	0.0	0.0	0.0	0.0	0.0	1.0	0.0	0.0	0.0	0.0	0.0	0.0	0.0	0.0	0.0	0.0	0.0
FOXP2	93986	symbol	H. sapiens	93986	H. sapiens	0.0	0.0	0.0	0.0	0.0	0.0	0.0	1.0	0.0	0.0	0.0	0.0	0.0	0.0	0.0	0.0	0.0	0.0	0.0	0.0
CALU	813	symbol	H. sapiens	813	H. sapiens	0.0	0.0	0.0	0.0	0.0	0.0	0.0	1.0	0.0	0.0	0.0	0.0	0.0	0.0	0.0	0.0	0.0	0.0	0.0	0.0
CCDC32	90416	symbol	H. sapiens	90416	H. sapiens	0.0	0.0	0.0	0.0	0.0	0.0	0.0	0.0	0.0	0.0	0.0	0.0	0.0	0.0	0.0	0.0	0.0	0.0	0.0	0.0
MINDY2	54629	symbol	H. sapiens	54629	H. sapiens	0.0	0.0	0.0	0.0	0.0	0.0	0.0	1.0	0.0	0.0	0.0	0.0	0.0	0.0	0.0	0.0	0.0	0.0	0.0	0.0
CLN6	54982	symbol	H. sapiens	54982	H. sapiens	0.0	0.0	0.0	0.0	0.0	0.0	0.0	0.0	0.0	1.0	0.0	0.0	0.0	0.0	0.0	0.0	0.0	0.0	0.0	0.0
MBD4	8930	symbol	H. sapiens	8930	H. sapiens	0.0	0.0	0.0	1.0	0.0	0.0	0.0	0.0	0.0	0.0	0.0	0.0	0.0	0.0	0.0	0.0	0.0	0.0	0.0	0.0
TXNDC17	84817	symbol	H. sapiens	84817	H. sapiens	0.0	0.0	0.0	0.0	0.0	0.0	0.0	1.0	0.0	0.0	0.0	0.0	0.0	0.0	0.0	0.0	0.0	0.0	0.0	0.0
MPDU1	9526	symbol	H. sapiens	9526	H. sapiens	0.0	0.0	0.0	1.0	0.0	0.0	0.0	0.0	0.0	0.0	0.0	0.0	0.0	0.0	0.0	0.0	0.0	0.0	0.0	0.0
EGLN3	112399	symbol	H. sapiens	112399	H. sapiens	0.0	0.0	0.0	0.0	0.0	0.0	1.0	1.0	0.0	0.0	0.0	0.0	1.0	0.0	0.0	0.0	0.0	0.0	0.0	0.0
NRL	4901	symbol	H. sapiens	4901	H. sapiens	0.0	0.0	0.0	0.0	0.0	0.0	0.0	0.0	0.0	0.0	0.0	0.0	0.0	0.0	0.0	0.0	0.0	0.0	0.0	0.0
FGF13	2258	symbol	H. sapiens	2258	H. sapiens	0.0	0.0	0.0	0.0	0.0	0.0	0.0	0.0	0.0	0.0	0.0	1.0	0.0	0.0	0.0	0.0	0.0	0.0	0.0	0.0
LDLR	3949	symbol	H. sapiens	3949	H. sapiens	0.0	0.0	0.0	1.0	0.0	0.0	0.0	1.0	0.0	1.0	0.0	0.0	0.0	1.0	0.0	0.0	0.0	0.0	0.0	0.0
GTPBP3	84705	symbol	H. sapiens	84705	H. sapiens	1.0	1.0	0.0	0.0	0.0	0.0	0.0	0.0	0.0	0.0	0.0	0.0	0.0	0.0	0.0	1.0	0.0	0.0	0.0	0.0
SLC27A1	376497	symbol	H. sapiens	376497	H. sapiens	0.0	0.0	0.0	1.0	0.0	0.0	0.0	1.0	0.0	1.0	0.0	0.0	1.0	0.0	0.0	0.0	0.0	0.0	0.0	0.0
NSUN5	55695	symbol	H. sapiens	55695	H. sapiens	1.0	1.0	0.0	0.0	0.0	0.0	0.0	0.0	0.0	0.0	0.0	0.0	0.0	0.0	0.0	1.0	0.0	0.0	0.0	0.0
PGPEP1	54858	symbol	H. sapiens	54858	H. sapiens	0.0	0.0	0.0	0.0	0.0	0.0	0.0	0.0	0.0	0.0	0.0	0.0	0.0	0.0	0.0	0.0	0.0	0.0	0.0	0.0
CAMSAP1	157922	symbol	H. sapiens	157922	H. sapiens	0.0	0.0	0.0	0.0	0.0	0.0	0.0	0.0	0.0	0.0	0.0	1.0	0.0	0.0	0.0	0.0	0.0	0.0	0.0	0.0
LAMA5	3911	symbol	H. sapiens	3911	H. sapiens	0.0	0.0	1.0	0.0	0.0	0.0	0.0	1.0	0.0	0.0	0.0	0.0	0.0	0.0	0.0	0.0	0.0	0.0	0.0	0.0
POMT1	10585	symbol	H. sapiens	10585	H. sapiens	0.0	0.0	0.0	1.0	0.0	0.0	0.0	0.0	0.0	0.0	0.0	0.0	0.0	0.0	0.0	0.0	0.0	0.0	0.0	0.0
UBE2M	9040	symbol	H. sapiens	9040	H. sapiens	0.0	0.0	0.0	0.0	0.0	0.0	0.0	1.0	0.0	0.0	0.0	0.0	0.0	0.0	0.0	0.0	0.0	0.0	0.0	0.0
METTL26	84326	symbol	H. sapiens	84326	H. sapiens	0.0	0.0	0.0	0.0	0.0	0.0	0.0	0.0	0.0	0.0	0.0	0.0	0.0	0.0	0.0	0.0	0.0	0.0	0.0	0.0
UBE4B	10277	symbol	H. sapiens	10277	H. sapiens	0.0	0.0	0.0	0.0	0.0	0.0	0.0	0.0	0.0	0.0	0.0	0.0	0.0	1.0	0.0	0.0	0.0	0.0	0.0	0.0
EPS8L1	54869	symbol	H. sapiens	54869	H. sapiens	0.0	0.0	1.0	0.0	0.0	0.0	0.0	0.0	0.0	0.0	0.0	0.0	0.0	0.0	0.0	0.0	0.0	0.0	0.0	0.0
RBM39	9584	symbol	H. sapiens	9584	H. sapiens	0.0	0.0	0.0	0.0	0.0	0.0	0.0	0.0	1.0	0.0	0.0	0.0	0.0	0.0	0.0	0.0	0.0	0.0	0.0	0.0
ABCB7	22	symbol	H. sapiens	22	H. sapiens	0.0	0.0	0.0	0.0	0.0	0.0	0.0	0.0	0.0	0.0	0.0	0.0	0.0	0.0	0.0	0.0	0.0	0.0	0.0	0.0
NR1H2	7376	symbol	H. sapiens	7376	H. sapiens	0.0	0.0	0.0	1.0	0.0	0.0	1.0	1.0	0.0	1.0	0.0	0.0	0.0	0.0	0.0	0.0	0.0	0.0	0.0	0.0
PSME3	10197	symbol	H. sapiens	10197	H. sapiens	0.0	0.0	0.0	1.0	1.0	0.0	1.0	1.0	0.0	0.0	0.0	0.0	1.0	1.0	0.0	0.0	0.0	0.0	0.0	0.0
NPHP4	261734	symbol	H. sapiens	261734	H. sapiens	0.0	0.0	1.0	0.0	0.0	1.0	0.0	1.0	0.0	0.0	0.0	0.0	0.0	0.0	0.0	0.0	0.0	1.0	0.0	0.0
WDR44	54521	symbol	H. sapiens	54521	H. sapiens	0.0	0.0	0.0	0.0	0.0	0.0	0.0	0.0	0.0	0.0	0.0	0.0	0.0	0.0	0.0	0.0	0.0	0.0	0.0	0.0
ZCCHC9	84240	symbol	H. sapiens	84240	H. sapiens	0.0	0.0	0.0	0.0	0.0	0.0	0.0	0.0	0.0	0.0	0.0	0.0	0.0	0.0	0.0	0.0	0.0	0.0	0.0	0.0
PIAS3	10401	symbol	H. sapiens	10401	H. sapiens	0.0	1.0	0.0	0.0	0.0	0.0	0.0	1.0	0.0	0.0	0.0	0.0	0.0	0.0	0.0	0.0	0.0	0.0	0.0	0.0
MCCC2	64087	symbol	H. sapiens	64087	H. sapiens	0.0	0.0	0.0	1.0	0.0	0.0	0.0	0.0	0.0	0.0	0.0	0.0	1.0	0.0	0.0	0.0	0.0	0.0	0.0	0.0
C19orf12	83636	symbol	H. sapiens	83636	H. sapiens	0.0	0.0	0.0	0.0	0.0	0.0	0.0	0.0	0.0	0.0	0.0	0.0	0.0	0.0	0.0	0.0	1.0	0.0	0.0	0.0
LGALS3	3958	symbol	H. sapiens	3958	H. sapiens	0.0	0.0	0.0	0.0	0.0	0.0	0.0	1.0	1.0	0.0	0.0	0.0	0.0	0.0	0.0	0.0	0.0	0.0	0.0	0.0
TRIM5	85363	symbol	H. sapiens	85363	H. sapiens	0.0	0.0	0.0	0.0	0.0	0.0	0.0	1.0	0.0	0.0	0.0	0.0	0.0	1.0	0.0	0.0	1.0	0.0	0.0	0.0
PRKAA1	5562	symbol	H. sapiens	5562	H. sapiens	1.0	1.0	0.0	1.0	1.0	0.0	0.0	1.0	1.0	1.0	0.0	1.0	0.0	0.0	1.0	0.0	1.0	0.0	1.0	0.0
ITGB4	3691	symbol	H. sapiens	3691	H. sapiens	0.0	0.0	0.0	0.0	0.0	0.0	0.0	0.0	0.0	0.0	0.0	0.0	0.0	0.0	0.0	0.0	1.0	0.0	0.0	0.0
XAF1	54739	symbol	H. sapiens	54739	H. sapiens	0.0	0.0	0.0	0.0	0.0	0.0	0.0	1.0	0.0	0.0	0.0	0.0	0.0	0.0	0.0	0.0	0.0	0.0	0.0	0.0
DLG4	1742	symbol	H. sapiens	1742	H. sapiens	0.0	0.0	0.0	0.0	0.0	1.0	0.0	1.0	0.0	0.0	0.0	0.0	0.0	0.0	0.0	0.0	0.0	0.0	0.0	0.0
REEP2	51308	symbol	H. sapiens	51308	H. sapiens	0.0	0.0	0.0	0.0	0.0	0.0	0.0	0.0	0.0	0.0	0.0	0.0	0.0	0.0	0.0	0.0	0.0	0.0	0.0	0.0
PRMT7	54496	symbol	H. sapiens	54496	H. sapiens	1.0	1.0	0.0	0.0	0.0	0.0	0.0	0.0	1.0	0.0	0.0	0.0	0.0	0.0	0.0	0.0	0.0	0.0	0.0	0.0
RHBG	57127	symbol	H. sapiens	57127	H. sapiens	0.0	0.0	0.0	0.0	0.0	0.0	0.0	0.0	0.0	0.0	0.0	0.0	0.0	0.0	0.0	0.0	0.0	0.0	0.0	0.0
DCAF8	50717	symbol	H. sapiens	50717	H. sapiens	0.0	0.0	0.0	0.0	0.0	0.0	0.0	1.0	0.0	0.0	0.0	0.0	0.0	0.0	0.0	0.0	0.0	0.0	0.0	0.0
NASP	4678	symbol	H. sapiens	4678	H. sapiens	0.0	0.0	0.0	0.0	1.0	0.0	0.0	0.0	0.0	0.0	0.0	0.0	0.0	0.0	0.0	0.0	0.0	0.0	0.0	0.0
MUTYH	4595	symbol	H. sapiens	4595	H. sapiens	0.0	0.0	0.0	0.0	0.0	0.0	0.0	0.0	0.0	0.0	0.0	0.0	0.0	0.0	0.0	0.0	0.0	0.0	0.0	0.0
AP3B1	8546	symbol	H. sapiens	8546	H. sapiens	0.0	0.0	0.0	0.0	0.0	1.0	0.0	1.0	0.0	0.0	0.0	1.0	0.0	0.0	0.0	0.0	0.0	0.0	1.0	0.0
CASP9	842	symbol	H. sapiens	842	H. sapiens	0.0	0.0	0.0	0.0	0.0	0.0	1.0	0.0	0.0	0.0	0.0	0.0	0.0	0.0	0.0	0.0	0.0	0.0	0.0	0.0
ZMYM5	9205	symbol	H. sapiens	9205	H. sapiens	0.0	0.0	0.0	0.0	0.0	0.0	0.0	0.0	0.0	0.0	0.0	0.0	0.0	0.0	0.0	0.0	0.0	0.0	0.0	0.0
PEMT	10400	symbol	H. sapiens	10400	H. sapiens	0.0	1.0	0.0	1.0	0.0	0.0	0.0	0.0	0.0	1.0	0.0	0.0	1.0	0.0	0.0	0.0	0.0	0.0	0.0	0.0
BEX2	84707	symbol	H. sapiens	84707	H. sapiens	0.0	0.0	0.0	0.0	0.0	0.0	0.0	0.0	0.0	0.0	0.0	0.0	0.0	0.0	0.0	0.0	0.0	0.0	0.0	0.0
TCEAL4	79921	symbol	H. sapiens	79921	H. sapiens	0.0	0.0	0.0	0.0	0.0	0.0	0.0	0.0	0.0	0.0	0.0	0.0	0.0	0.0	0.0	0.0	0.0	0.0	0.0	0.0
RTN3	10313	symbol	H. sapiens	10313	H. sapiens	0.0	0.0	0.0	0.0	0.0	0.0	0.0	0.0	0.0	0.0	0.0	0.0	0.0	0.0	0.0	0.0	0.0	0.0	0.0	0.0
MED10	84246	symbol	H. sapiens	84246	H. sapiens	0.0	0.0	0.0	0.0	0.0	0.0	0.0	0.0	0.0	0.0	0.0	0.0	0.0	0.0	0.0	0.0	0.0	0.0	0.0	0.0
C12orf29	91298	symbol	H. sapiens	91298	H. sapiens	0.0	0.0	0.0	0.0	0.0	0.0	0.0	1.0	0.0	0.0	0.0	0.0	0.0	0.0	0.0	0.0	0.0	0.0	0.0	0.0
KRAS	3845	symbol	H. sapiens	3845	H. sapiens	0.0	0.0	0.0	0.0	0.0	0.0	0.0	1.0	0.0	0.0	0.0	0.0	0.0	0.0	0.0	0.0	0.0	1.0	0.0	0.0
CCDC59	29080	symbol	H. sapiens	29080	H. sapiens	0.0	0.0	0.0	0.0	0.0	0.0	0.0	0.0	0.0	0.0	0.0	0.0	0.0	0.0	0.0	0.0	0.0	0.0	0.0	0.0
AMPD3	272	symbol	H. sapiens	272	H. sapiens	0.0	0.0	0.0	1.0	0.0	0.0	0.0	0.0	0.0	0.0	0.0	0.0	0.0	0.0	0.0	0.0	0.0	0.0	0.0	0.0
SBF2	81846	symbol	H. sapiens	81846	H. sapiens	0.0	0.0	0.0	0.0	0.0	0.0	1.0	0.0	0.0	0.0	0.0	0.0	0.0	0.0	0.0	0.0	1.0	0.0	0.0	0.0
RRAS2	22800	symbol	H. sapiens	22800	H. sapiens	0.0	0.0	0.0	0.0	0.0	0.0	0.0	0.0	0.0	0.0	0.0	0.0	0.0	0.0	0.0	0.0	0.0	0.0	0.0	0.0
ZFC3H1	196441	symbol	H. sapiens	196441	H. sapiens	0.0	0.0	0.0	0.0	0.0	0.0	0.0	0.0	0.0	0.0	0.0	0.0	0.0	0.0	0.0	0.0	0.0	0.0	0.0	0.0
NUMB	8650	symbol	H. sapiens	8650	H. sapiens	0.0	0.0	0.0	0.0	0.0	0.0	0.0	0.0	0.0	0.0	0.0	0.0	0.0	0.0	0.0	0.0	0.0	0.0	0.0	0.0
CDK7	1022	symbol	H. sapiens	1022	H. sapiens	1.0	0.0	0.0	0.0	1.0	0.0	0.0	0.0	1.0	0.0	0.0	0.0	0.0	0.0	0.0	0.0	0.0	0.0	0.0	0.0
KATNBL1	79768	symbol	H. sapiens	79768	H. sapiens	0.0	0.0	0.0	0.0	0.0	0.0	0.0	0.0	0.0	0.0	0.0	1.0	0.0	0.0	0.0	0.0	0.0	0.0	0.0	0.0
LAMTOR5	10542	symbol	H. sapiens	10542	H. sapiens	0.0	0.0	0.0	0.0	1.0	0.0	0.0	0.0	0.0	0.0	0.0	0.0	0.0	0.0	0.0	0.0	1.0	0.0	0.0	0.0
CEPT1	10390	symbol	H. sapiens	10390	H. sapiens	0.0	0.0	0.0	1.0	0.0	0.0	0.0	0.0	0.0	1.0	0.0	0.0	0.0	0.0	0.0	0.0	0.0	0.0	0.0	0.0
PPHLN1	51535	symbol	H. sapiens	51535	H. sapiens	0.0	1.0	0.0	0.0	0.0	0.0	0.0	0.0	0.0	0.0	0.0	0.0	0.0	0.0	0.0	0.0	0.0	0.0	0.0	0.0
FBXO18	84893	gene_synonym	H. sapiens	84893	H. sapiens	0.0	0.0	0.0	1.0	0.0	0.0	0.0	0.0	0.0	0.0	0.0	0.0	0.0	0.0	0.0	0.0	0.0	0.0	0.0	0.0
RERG	85004	symbol	H. sapiens	85004	H. sapiens	0.0	0.0	0.0	0.0	0.0	0.0	0.0	0.0	0.0	0.0	0.0	0.0	0.0	0.0	0.0	0.0	0.0	0.0	0.0	0.0
STK26	51765	symbol	H. sapiens	51765	H. sapiens	0.0	0.0	1.0	0.0	0.0	0.0	0.0	0.0	0.0	0.0	0.0	0.0	0.0	0.0	0.0	0.0	0.0	0.0	0.0	0.0
HOOK1	51361	symbol	H. sapiens	51361	H. sapiens	0.0	0.0	0.0	0.0	0.0	1.0	0.0	0.0	0.0	0.0	0.0	1.0	0.0	0.0	0.0	0.0	0.0	0.0	0.0	0.0
FADS2	9415	symbol	H. sapiens	9415	H. sapiens	0.0	0.0	0.0	1.0	0.0	0.0	0.0	0.0	0.0	1.0	0.0	0.0	0.0	0.0	0.0	0.0	0.0	0.0	0.0	0.0
CLOCK	9575	symbol	H. sapiens	9575	H. sapiens	0.0	1.0	0.0	0.0	1.0	0.0	0.0	1.0	0.0	0.0	0.0	0.0	0.0	1.0	0.0	0.0	0.0	0.0	0.0	0.0
GGACT	87769	symbol	H. sapiens	87769	H. sapiens	0.0	0.0	0.0	0.0	0.0	0.0	0.0	0.0	0.0	0.0	0.0	0.0	0.0	0.0	0.0	0.0	0.0	0.0	0.0	0.0
UBAC2	337867	symbol	H. sapiens	337867	H. sapiens	0.0	0.0	0.0	0.0	0.0	0.0	0.0	0.0	0.0	0.0	0.0	0.0	0.0	1.0	0.0	0.0	0.0	0.0	0.0	0.0
ARHGAP32	9743	symbol	H. sapiens	9743	H. sapiens	0.0	0.0	0.0	0.0	0.0	0.0	1.0	0.0	0.0	0.0	0.0	0.0	0.0	0.0	0.0	0.0	0.0	0.0	0.0	0.0
NREP	9315	symbol	H. sapiens	9315	H. sapiens	0.0	0.0	0.0	0.0	0.0	0.0	0.0	0.0	0.0	0.0	0.0	0.0	0.0	0.0	0.0	0.0	0.0	0.0	0.0	0.0
WDR36	134430	symbol	H. sapiens	134430	H. sapiens	1.0	0.0	0.0	0.0	0.0	0.0	0.0	0.0	0.0	0.0	0.0	0.0	0.0	0.0	0.0	0.0	0.0	0.0	0.0	0.0
TAOK3	51347	symbol	H. sapiens	51347	H. sapiens	0.0	0.0	0.0	0.0	1.0	0.0	0.0	1.0	0.0	0.0	0.0	0.0	0.0	0.0	0.0	0.0	0.0	0.0	0.0	0.0
MTO1	25821	symbol	H. sapiens	25821	H. sapiens	1.0	1.0	0.0	0.0	0.0	0.0	0.0	0.0	0.0	0.0	0.0	0.0	0.0	0.0	1.0	1.0	0.0	0.0	0.0	0.0
CDK4	1019	symbol	H. sapiens	1019	H. sapiens	0.0	0.0	0.0	0.0	1.0	0.0	0.0	0.0	0.0	1.0	0.0	0.0	0.0	0.0	0.0	0.0	0.0	0.0	0.0	0.0
B4GALNT1	2583	symbol	H. sapiens	2583	H. sapiens	0.0	0.0	0.0	1.0	0.0	0.0	0.0	0.0	0.0	1.0	0.0	0.0	0.0	0.0	0.0	0.0	0.0	0.0	0.0	0.0
OS9	10956	symbol	H. sapiens	10956	H. sapiens	0.0	0.0	0.0	0.0	0.0	0.0	0.0	0.0	0.0	0.0	0.0	0.0	0.0	1.0	0.0	0.0	0.0	0.0	1.0	0.0
AHI1	54806	symbol	H. sapiens	54806	H. sapiens	0.0	0.0	1.0	0.0	0.0	1.0	0.0	1.0	0.0	0.0	0.0	0.0	0.0	0.0	0.0	0.0	0.0	0.0	0.0	0.0
SEMA4F	10505	symbol	H. sapiens	10505	H. sapiens	0.0	0.0	0.0	0.0	0.0	0.0	0.0	1.0	0.0	0.0	0.0	0.0	0.0	0.0	0.0	0.0	0.0	0.0	0.0	0.0
KIAA0513	9764	symbol	H. sapiens	9764	H. sapiens	0.0	0.0	0.0	0.0	0.0	0.0	0.0	0.0	0.0	0.0	0.0	0.0	0.0	0.0	0.0	0.0	0.0	0.0	0.0	0.0
COG2	22796	symbol	H. sapiens	22796	H. sapiens	0.0	0.0	0.0	0.0	0.0	0.0	0.0	0.0	0.0	0.0	0.0	0.0	0.0	0.0	0.0	0.0	0.0	0.0	0.0	0.0
NTPCR	84284	symbol	H. sapiens	84284	H. sapiens	0.0	0.0	0.0	0.0	0.0	0.0	0.0	0.0	0.0	0.0	0.0	0.0	0.0	0.0	0.0	0.0	0.0	0.0	0.0	0.0
TTLL4	9654	symbol	H. sapiens	9654	H. sapiens	0.0	0.0	0.0	0.0	0.0	0.0	0.0	0.0	0.0	0.0	0.0	0.0	0.0	0.0	0.0	0.0	0.0	0.0	0.0	0.0
USP37	57695	symbol	H. sapiens	57695	H. sapiens	0.0	0.0	0.0	0.0	1.0	0.0	0.0	1.0	0.0	0.0	0.0	0.0	0.0	1.0	0.0	0.0	0.0	0.0	0.0	0.0
ISCU	23479	symbol	H. sapiens	23479	H. sapiens	0.0	0.0	0.0	1.0	0.0	0.0	0.0	1.0	0.0	0.0	0.0	0.0	1.0	0.0	0.0	0.0	0.0	0.0	0.0	0.0
RNASEH2B	79621	symbol	H. sapiens	79621	H. sapiens	0.0	0.0	0.0	1.0	1.0	0.0	0.0	0.0	0.0	0.0	0.0	0.0	0.0	0.0	0.0	0.0	0.0	0.0	0.0	0.0
LRCH1	23143	symbol	H. sapiens	23143	H. sapiens	0.0	0.0	0.0	0.0	0.0	0.0	1.0	0.0	0.0	0.0	0.0	0.0	0.0	0.0	0.0	0.0	0.0	0.0	0.0	0.0
SUCLA2	8803	symbol	H. sapiens	8803	H. sapiens	0.0	0.0	0.0	1.0	0.0	0.0	0.0	0.0	0.0	0.0	0.0	0.0	1.0	0.0	0.0	0.0	0.0	0.0	0.0	0.0
COG3	83548	symbol	H. sapiens	83548	H. sapiens	0.0	0.0	0.0	1.0	0.0	0.0	0.0	0.0	0.0	0.0	0.0	0.0	0.0	0.0	0.0	0.0	0.0	0.0	0.0	0.0
SETDB2	83852	symbol	H. sapiens	83852	H. sapiens	0.0	1.0	0.0	0.0	0.0	0.0	0.0	0.0	0.0	0.0	0.0	0.0	0.0	0.0	0.0	0.0	0.0	0.0	0.0	0.0
BZW2	28969	symbol	H. sapiens	28969	H. sapiens	0.0	0.0	0.0	0.0	0.0	0.0	0.0	0.0	0.0	0.0	0.0	0.0	0.0	0.0	0.0	0.0	0.0	0.0	0.0	0.0
TACO1	51204	symbol	H. sapiens	51204	H. sapiens	0.0	0.0	0.0	0.0	0.0	0.0	0.0	0.0	0.0	0.0	0.0	0.0	0.0	0.0	0.0	0.0	0.0	0.0	0.0	0.0
TEX2	55852	symbol	H. sapiens	55852	H. sapiens	0.0	0.0	0.0	0.0	0.0	0.0	0.0	0.0	0.0	0.0	0.0	0.0	0.0	0.0	0.0	0.0	0.0	0.0	0.0	0.0
EPRS	2058	symbol	H. sapiens	2058	H. sapiens	1.0	0.0	0.0	0.0	0.0	0.0	0.0	0.0	0.0	0.0	0.0	0.0	1.0	0.0	0.0	1.0	0.0	0.0	0.0	0.0
VPS45	11311	symbol	H. sapiens	11311	H. sapiens	0.0	0.0	1.0	0.0	0.0	1.0	0.0	0.0	0.0	0.0	0.0	0.0	0.0	0.0	0.0	0.0	0.0	0.0	0.0	0.0
WDR33	55339	symbol	H. sapiens	55339	H. sapiens	0.0	0.0	0.0	0.0	0.0	0.0	0.0	0.0	1.0	0.0	0.0	0.0	0.0	0.0	0.0	0.0	0.0	0.0	0.0	0.0
ABI1	10006	symbol	H. sapiens	10006	H. sapiens	0.0	0.0	0.0	0.0	0.0	0.0	0.0	1.0	0.0	0.0	0.0	0.0	0.0	0.0	0.0	0.0	0.0	1.0	0.0	0.0
LRRC8A	56262	symbol	H. sapiens	56262	H. sapiens	0.0	0.0	0.0	0.0	0.0	0.0	0.0	0.0	0.0	0.0	0.0	0.0	0.0	0.0	0.0	0.0	0.0	0.0	0.0	0.0
APTX	54840	symbol	H. sapiens	54840	H. sapiens	0.0	0.0	0.0	0.0	0.0	0.0	0.0	0.0	0.0	0.0	0.0	0.0	0.0	0.0	0.0	0.0	0.0	0.0	0.0	0.0
RNF38	152006	symbol	H. sapiens	152006	H. sapiens	0.0	0.0	0.0	0.0	0.0	0.0	0.0	0.0	0.0	0.0	0.0	0.0	0.0	0.0	0.0	0.0	0.0	0.0	0.0	0.0
HINT2	84681	symbol	H. sapiens	84681	H. sapiens	0.0	1.0	0.0	0.0	0.0	0.0	0.0	0.0	0.0	1.0	0.0	0.0	0.0	0.0	0.0	0.0	0.0	0.0	0.0	0.0
YIPF3	25844	symbol	H. sapiens	25844	H. sapiens	0.0	0.0	0.0	0.0	0.0	0.0	0.0	0.0	0.0	0.0	0.0	0.0	0.0	0.0	0.0	0.0	0.0	0.0	0.0	0.0
NRM	11270	symbol	H. sapiens	11270	H. sapiens	0.0	0.0	0.0	0.0	0.0	0.0	0.0	0.0	0.0	0.0	0.0	0.0	0.0	0.0	0.0	0.0	0.0	0.0	0.0	0.0
CPEB2	132864	symbol	H. sapiens	132864	H. sapiens	0.0	0.0	0.0	0.0	0.0	0.0	1.0	1.0	0.0	0.0	0.0	0.0	0.0	0.0	0.0	0.0	0.0	0.0	0.0	0.0
ANKRD42	338699	symbol	H. sapiens	338699	H. sapiens	0.0	0.0	0.0	0.0	0.0	0.0	0.0	0.0	0.0	0.0	0.0	0.0	0.0	0.0	0.0	0.0	0.0	0.0	0.0	0.0
RAB30	27314	symbol	H. sapiens	27314	H. sapiens	0.0	0.0	0.0	0.0	0.0	0.0	0.0	0.0	0.0	0.0	0.0	0.0	0.0	0.0	0.0	0.0	0.0	0.0	0.0	0.0
SULF1	23213	symbol	H. sapiens	23213	H. sapiens	0.0	0.0	0.0	0.0	0.0	0.0	0.0	1.0	0.0	0.0	0.0	0.0	0.0	0.0	0.0	0.0	0.0	0.0	0.0	0.0
NEK1	4750	symbol	H. sapiens	4750	H. sapiens	0.0	0.0	1.0	0.0	0.0	0.0	0.0	0.0	0.0	0.0	0.0	0.0	0.0	0.0	0.0	0.0	0.0	0.0	0.0	0.0
TMPRSS13	84000	symbol	H. sapiens	84000	H. sapiens	0.0	0.0	0.0	0.0	0.0	0.0	0.0	0.0	0.0	0.0	0.0	0.0	0.0	0.0	0.0	0.0	0.0	0.0	0.0	0.0
ALKBH8	91801	symbol	H. sapiens	91801	H. sapiens	1.0	1.0	0.0	0.0	0.0	0.0	0.0	0.0	0.0	0.0	0.0	0.0	0.0	0.0	0.0	1.0	0.0	0.0	0.0	0.0
SLTM	79811	symbol	H. sapiens	79811	H. sapiens	0.0	0.0	0.0	0.0	0.0	0.0	0.0	1.0	1.0	0.0	0.0	0.0	0.0	0.0	0.0	0.0	0.0	0.0	0.0	0.0
NDUFAF1	51103	symbol	H. sapiens	51103	H. sapiens	0.0	0.0	0.0	1.0	0.0	0.0	0.0	0.0	0.0	0.0	0.0	0.0	0.0	0.0	0.0	0.0	0.0	0.0	1.0	0.0
ZNF280D	54816	symbol	H. sapiens	54816	H. sapiens	0.0	0.0	0.0	0.0	0.0	0.0	0.0	0.0	0.0	0.0	0.0	0.0	0.0	0.0	0.0	0.0	0.0	0.0	0.0	0.0
FNBP1L	54874	symbol	H. sapiens	54874	H. sapiens	0.0	0.0	1.0	0.0	0.0	1.0	0.0	0.0	0.0	0.0	0.0	0.0	0.0	0.0	0.0	0.0	1.0	1.0	0.0	0.0
KHK	3795	symbol	H. sapiens	3795	H. sapiens	0.0	0.0	0.0	1.0	0.0	0.0	0.0	1.0	0.0	0.0	0.0	0.0	0.0	0.0	0.0	0.0	0.0	0.0	0.0	0.0
THUMPD2	80745	symbol	H. sapiens	80745	H. sapiens	1.0	1.0	0.0	0.0	0.0	0.0	0.0	0.0	0.0	0.0	0.0	0.0	0.0	0.0	0.0	1.0	0.0	0.0	0.0	0.0
MYOF	26509	symbol	H. sapiens	26509	H. sapiens	0.0	0.0	0.0	1.0	0.0	0.0	0.0	0.0	0.0	0.0	0.0	0.0	0.0	0.0	0.0	0.0	0.0	0.0	0.0	0.0
IDH1	3417	symbol	H. sapiens	3417	H. sapiens	0.0	0.0	0.0	1.0	0.0	0.0	0.0	0.0	0.0	1.0	0.0	0.0	1.0	0.0	0.0	0.0	0.0	0.0	1.0	0.0
OLA1	29789	symbol	H. sapiens	29789	H. sapiens	0.0	0.0	0.0	1.0	0.0	0.0	0.0	0.0	0.0	0.0	0.0	0.0	0.0	0.0	0.0	0.0	0.0	0.0	0.0	0.0
PARP9	83666	symbol	H. sapiens	83666	H. sapiens	0.0	0.0	0.0	1.0	0.0	0.0	0.0	1.0	0.0	0.0	0.0	0.0	0.0	0.0	0.0	0.0	0.0	0.0	0.0	0.0
SECISBP2L	9728	symbol	H. sapiens	9728	H. sapiens	0.0	0.0	0.0	0.0	0.0	0.0	0.0	0.0	0.0	0.0	0.0	0.0	0.0	0.0	0.0	0.0	0.0	0.0	0.0	0.0
APH1B	83464	symbol	H. sapiens	83464	H. sapiens	0.0	0.0	0.0	0.0	0.0	0.0	0.0	0.0	0.0	0.0	0.0	0.0	0.0	0.0	0.0	0.0	0.0	0.0	0.0	0.0
RASGEF1B	153020	symbol	H. sapiens	153020	H. sapiens	0.0	0.0	0.0	0.0	0.0	0.0	0.0	0.0	0.0	0.0	0.0	0.0	0.0	0.0	0.0	0.0	0.0	0.0	0.0	0.0
BBS7	55212	symbol	H. sapiens	55212	H. sapiens	0.0	0.0	1.0	0.0	0.0	1.0	0.0	0.0	0.0	0.0	1.0	0.0	0.0	1.0	0.0	0.0	0.0	0.0	0.0	0.0
RAP1GDS1	5910	symbol	H. sapiens	5910	H. sapiens	0.0	0.0	0.0	0.0	0.0	0.0	1.0	0.0	0.0	0.0	0.0	0.0	0.0	0.0	0.0	0.0	0.0	1.0	0.0	0.0
NUP54	53371	symbol	H. sapiens	53371	H. sapiens	0.0	1.0	0.0	1.0	0.0	0.0	0.0	1.0	0.0	0.0	0.0	0.0	0.0	0.0	0.0	0.0	0.0	0.0	1.0	0.0
CASP6	839	symbol	H. sapiens	839	H. sapiens	0.0	0.0	0.0	0.0	0.0	0.0	0.0	0.0	0.0	0.0	0.0	0.0	0.0	0.0	0.0	0.0	0.0	0.0	0.0	0.0
HADH	3033	symbol	H. sapiens	3033	H. sapiens	0.0	0.0	0.0	1.0	0.0	0.0	0.0	0.0	0.0	0.0	0.0	0.0	0.0	0.0	0.0	0.0	0.0	0.0	0.0	0.0
EGF	1950	symbol	H. sapiens	1950	H. sapiens	0.0	0.0	0.0	1.0	1.0	0.0	0.0	1.0	0.0	0.0	0.0	0.0	0.0	1.0	0.0	0.0	0.0	0.0	0.0	0.0
RGS3	5998	symbol	H. sapiens	5998	H. sapiens	0.0	0.0	0.0	0.0	0.0	0.0	1.0	0.0	0.0	0.0	0.0	0.0	0.0	0.0	0.0	0.0	0.0	0.0	0.0	0.0
ETFBKMT	254013	symbol	H. sapiens	254013	H. sapiens	0.0	1.0	0.0	1.0	0.0	0.0	0.0	1.0	0.0	0.0	0.0	0.0	0.0	0.0	0.0	0.0	0.0	0.0	0.0	0.0
DUSP6	1848	symbol	H. sapiens	1848	H. sapiens	0.0	0.0	0.0	0.0	0.0	0.0	0.0	0.0	0.0	0.0	0.0	0.0	0.0	0.0	0.0	0.0	0.0	0.0	0.0	0.0
POC1B	282809	symbol	H. sapiens	282809	H. sapiens	0.0	0.0	1.0	0.0	0.0	0.0	0.0	0.0	0.0	0.0	0.0	0.0	0.0	0.0	0.0	0.0	0.0	0.0	0.0	0.0
TMTC3	160418	symbol	H. sapiens	160418	H. sapiens	0.0	0.0	0.0	1.0	0.0	0.0	0.0	0.0	0.0	0.0	0.0	0.0	0.0	1.0	0.0	0.0	0.0	0.0	0.0	0.0
SLC15A4	121260	symbol	H. sapiens	121260	H. sapiens	0.0	0.0	0.0	0.0	0.0	0.0	0.0	0.0	0.0	0.0	0.0	0.0	0.0	0.0	0.0	0.0	0.0	0.0	0.0	0.0
RITA1	84934	symbol	H. sapiens	84934	H. sapiens	0.0	0.0	0.0	0.0	0.0	0.0	0.0	0.0	0.0	0.0	0.0	0.0	0.0	0.0	0.0	0.0	0.0	0.0	0.0	0.0
SUOX	6821	symbol	H. sapiens	6821	H. sapiens	0.0	0.0	0.0	0.0	0.0	0.0	0.0	0.0	0.0	0.0	0.0	0.0	1.0	0.0	0.0	0.0	0.0	0.0	0.0	0.0
LMBR1L	55716	symbol	H. sapiens	55716	H. sapiens	0.0	0.0	0.0	0.0	0.0	0.0	0.0	0.0	0.0	0.0	0.0	0.0	0.0	0.0	0.0	0.0	0.0	0.0	0.0	0.0
LPAR6	10161	symbol	H. sapiens	10161	H. sapiens	0.0	0.0	0.0	0.0	0.0	0.0	0.0	0.0	0.0	0.0	0.0	0.0	0.0	0.0	0.0	0.0	0.0	0.0	0.0	0.0
MBNL2	10150	symbol	H. sapiens	10150	H. sapiens	0.0	0.0	0.0	0.0	0.0	0.0	0.0	1.0	1.0	0.0	0.0	0.0	0.0	0.0	0.0	0.0	0.0	0.0	0.0	0.0
FRMD6	122786	symbol	H. sapiens	122786	H. sapiens	0.0	0.0	0.0	0.0	0.0	0.0	0.0	0.0	0.0	0.0	0.0	0.0	0.0	0.0	0.0	0.0	0.0	1.0	0.0	0.0
EFCAB11	90141	symbol	H. sapiens	90141	H. sapiens	0.0	0.0	0.0	0.0	0.0	0.0	0.0	0.0	0.0	0.0	0.0	0.0	0.0	0.0	0.0	0.0	0.0	0.0	0.0	0.0
C14orf79	122616	gene_synonym	H. sapiens	122616	H. sapiens	0.0	0.0	0.0	0.0	0.0	0.0	0.0	0.0	0.0	0.0	0.0	0.0	0.0	0.0	0.0	0.0	0.0	0.0	0.0	0.0
WDR20	91833	symbol	H. sapiens	91833	H. sapiens	0.0	0.0	0.0	0.0	0.0	0.0	0.0	1.0	0.0	0.0	0.0	0.0	0.0	0.0	0.0	0.0	0.0	0.0	0.0	0.0
BNIP2	663	symbol	H. sapiens	663	H. sapiens	0.0	0.0	0.0	0.0	0.0	0.0	1.0	0.0	0.0	0.0	0.0	0.0	0.0	0.0	0.0	0.0	0.0	0.0	0.0	0.0
CDAN1	146059	symbol	H. sapiens	146059	H. sapiens	0.0	0.0	0.0	0.0	0.0	0.0	0.0	0.0	0.0	0.0	0.0	0.0	0.0	0.0	0.0	0.0	0.0	0.0	0.0	0.0
TLE3	7090	symbol	H. sapiens	7090	H. sapiens	0.0	0.0	0.0	0.0	0.0	0.0	0.0	1.0	0.0	0.0	0.0	0.0	0.0	0.0	0.0	0.0	0.0	0.0	0.0	0.0
DNAJA4	55466	symbol	H. sapiens	55466	H. sapiens	0.0	0.0	0.0	0.0	0.0	0.0	0.0	0.0	0.0	0.0	0.0	0.0	0.0	0.0	0.0	0.0	0.0	0.0	0.0	0.0
TPM1	7168	symbol	H. sapiens	7168	H. sapiens	0.0	0.0	0.0	0.0	0.0	0.0	1.0	0.0	0.0	0.0	0.0	1.0	0.0	0.0	0.0	0.0	0.0	1.0	0.0	0.0
USP3	9960	symbol	H. sapiens	9960	H. sapiens	0.0	1.0	0.0	0.0	0.0	0.0	0.0	1.0	0.0	0.0	0.0	0.0	0.0	1.0	0.0	0.0	0.0	0.0	0.0	0.0
PML	5371	symbol	H. sapiens	5371	H. sapiens	0.0	1.0	0.0	0.0	1.0	0.0	1.0	1.0	0.0	0.0	0.0	0.0	0.0	1.0	0.0	0.0	0.0	0.0	1.0	0.0
CPNE2	221184	symbol	H. sapiens	221184	H. sapiens	0.0	0.0	0.0	0.0	0.0	0.0	0.0	0.0	0.0	0.0	0.0	0.0	0.0	0.0	0.0	0.0	0.0	0.0	0.0	0.0
PDPK1	5170	symbol	H. sapiens	5170	H. sapiens	0.0	0.0	0.0	0.0	0.0	1.0	1.0	1.0	0.0	0.0	0.0	0.0	0.0	0.0	0.0	0.0	0.0	1.0	0.0	0.0
DEF8	54849	symbol	H. sapiens	54849	H. sapiens	0.0	0.0	1.0	0.0	0.0	1.0	0.0	0.0	0.0	0.0	0.0	0.0	0.0	0.0	0.0	0.0	0.0	0.0	0.0	0.0
SGSM2	9905	symbol	H. sapiens	9905	H. sapiens	0.0	0.0	0.0	0.0	0.0	0.0	1.0	0.0	0.0	0.0	0.0	0.0	0.0	0.0	0.0	0.0	0.0	0.0	0.0	0.0
SSH2	85464	symbol	H. sapiens	85464	H. sapiens	0.0	0.0	0.0	0.0	0.0	0.0	0.0	0.0	0.0	0.0	0.0	0.0	0.0	0.0	0.0	0.0	0.0	1.0	0.0	0.0
BCAS3	54828	symbol	H. sapiens	54828	H. sapiens	0.0	0.0	1.0	0.0	0.0	0.0	1.0	0.0	0.0	0.0	0.0	1.0	0.0	0.0	0.0	0.0	0.0	1.0	0.0	0.0
IMPA2	3613	symbol	H. sapiens	3613	H. sapiens	0.0	0.0	0.0	1.0	0.0	0.0	0.0	0.0	0.0	1.0	0.0	0.0	0.0	0.0	0.0	0.0	0.0	0.0	0.0	0.0
C18orf21	83608	symbol	H. sapiens	83608	H. sapiens	0.0	0.0	0.0	0.0	0.0	0.0	0.0	0.0	0.0	0.0	0.0	0.0	0.0	0.0	0.0	0.0	0.0	0.0	0.0	0.0
GATA6	2627	symbol	H. sapiens	2627	H. sapiens	0.0	0.0	0.0	0.0	1.0	0.0	0.0	1.0	0.0	1.0	0.0	0.0	0.0	0.0	0.0	0.0	0.0	0.0	0.0	0.0
CSNK1D	1453	symbol	H. sapiens	1453	H. sapiens	0.0	0.0	1.0	0.0	1.0	1.0	0.0	1.0	0.0	0.0	1.0	1.0	0.0	1.0	0.0	0.0	0.0	0.0	0.0	0.0
FOXK2	3607	symbol	H. sapiens	3607	H. sapiens	0.0	0.0	0.0	1.0	0.0	0.0	0.0	1.0	0.0	0.0	0.0	0.0	0.0	0.0	0.0	0.0	1.0	0.0	0.0	0.0
RNF165	494470	symbol	H. sapiens	494470	H. sapiens	0.0	0.0	0.0	0.0	0.0	0.0	0.0	0.0	0.0	0.0	0.0	0.0	0.0	1.0	0.0	0.0	0.0	0.0	0.0	0.0
NFIC	4782	symbol	H. sapiens	4782	H. sapiens	0.0	0.0	0.0	0.0	0.0	0.0	0.0	0.0	0.0	0.0	0.0	0.0	0.0	0.0	0.0	0.0	0.0	0.0	0.0	0.0
MVB12A	93343	symbol	H. sapiens	93343	H. sapiens	0.0	0.0	0.0	0.0	0.0	1.0	0.0	0.0	0.0	0.0	0.0	0.0	0.0	1.0	0.0	0.0	1.0	0.0	0.0	0.0
NOSIP	51070	symbol	H. sapiens	51070	H. sapiens	0.0	0.0	0.0	0.0	0.0	0.0	0.0	0.0	0.0	0.0	0.0	0.0	0.0	0.0	0.0	0.0	0.0	0.0	0.0	0.0
NBPF3	84224	symbol	H. sapiens	84224	H. sapiens	0.0	0.0	0.0	0.0	0.0	0.0	0.0	0.0	0.0	0.0	0.0	0.0	0.0	0.0	0.0	0.0	0.0	0.0	0.0	0.0
PIGK	10026	symbol	H. sapiens	10026	H. sapiens	0.0	0.0	0.0	1.0	0.0	0.0	0.0	0.0	0.0	1.0	0.0	0.0	0.0	0.0	0.0	0.0	0.0	0.0	0.0	0.0
PTPRF	5792	symbol	H. sapiens	5792	H. sapiens	0.0	0.0	0.0	0.0	0.0	0.0	0.0	0.0	0.0	0.0	0.0	0.0	0.0	0.0	0.0	0.0	0.0	0.0	0.0	0.0
MTF2	22823	symbol	H. sapiens	22823	H. sapiens	0.0	1.0	0.0	0.0	0.0	0.0	0.0	1.0	0.0	0.0	0.0	0.0	0.0	0.0	0.0	0.0	0.0	0.0	0.0	0.0
UCK2	7371	symbol	H. sapiens	7371	H. sapiens	0.0	0.0	0.0	1.0	0.0	0.0	0.0	0.0	0.0	0.0	0.0	0.0	0.0	0.0	0.0	0.0	0.0	0.0	0.0	0.0
USP21	27005	symbol	H. sapiens	27005	H. sapiens	0.0	1.0	0.0	0.0	0.0	0.0	0.0	1.0	0.0	0.0	0.0	0.0	0.0	1.0	0.0	0.0	0.0	0.0	0.0	0.0
LYPLAL1	127018	symbol	H. sapiens	127018	H. sapiens	0.0	0.0	0.0	0.0	0.0	0.0	0.0	0.0	0.0	1.0	0.0	0.0	0.0	0.0	0.0	0.0	0.0	0.0	0.0	0.0
ZNF687	57592	symbol	H. sapiens	57592	H. sapiens	0.0	0.0	0.0	0.0	0.0	0.0	0.0	0.0	0.0	0.0	0.0	0.0	0.0	0.0	0.0	0.0	0.0	0.0	0.0	0.0
PI4KB	5298	symbol	H. sapiens	5298	H. sapiens	0.0	0.0	0.0	1.0	0.0	0.0	0.0	0.0	0.0	1.0	0.0	0.0	0.0	0.0	0.0	0.0	0.0	0.0	0.0	0.0
ANP32E	81611	symbol	H. sapiens	81611	H. sapiens	0.0	0.0	0.0	0.0	0.0	0.0	0.0	0.0	0.0	0.0	0.0	0.0	0.0	0.0	0.0	0.0	0.0	0.0	0.0	0.0
MINDY1	55793	symbol	H. sapiens	55793	H. sapiens	0.0	0.0	0.0	0.0	0.0	0.0	0.0	1.0	0.0	0.0	0.0	0.0	0.0	0.0	0.0	0.0	0.0	0.0	0.0	0.0
VASH2	79805	symbol	H. sapiens	79805	H. sapiens	0.0	0.0	0.0	0.0	0.0	0.0	0.0	0.0	0.0	0.0	0.0	0.0	0.0	0.0	0.0	0.0	0.0	0.0	0.0	0.0
TP53BP2	7159	symbol	H. sapiens	7159	H. sapiens	0.0	0.0	0.0	0.0	1.0	0.0	0.0	0.0	0.0	0.0	0.0	0.0	0.0	0.0	0.0	0.0	0.0	0.0	1.0	0.0
ATP8B2	57198	symbol	H. sapiens	57198	H. sapiens	0.0	0.0	0.0	0.0	0.0	0.0	0.0	0.0	0.0	0.0	0.0	0.0	0.0	0.0	0.0	0.0	0.0	0.0	0.0	0.0
UBAP2L	9898	symbol	H. sapiens	9898	H. sapiens	0.0	0.0	0.0	0.0	0.0	0.0	0.0	0.0	0.0	0.0	0.0	0.0	0.0	0.0	0.0	0.0	0.0	0.0	0.0	0.0
HCN3	57657	symbol	H. sapiens	57657	H. sapiens	0.0	0.0	0.0	0.0	0.0	0.0	0.0	0.0	0.0	0.0	0.0	0.0	0.0	0.0	0.0	0.0	0.0	0.0	0.0	0.0
NVL	4931	symbol	H. sapiens	4931	H. sapiens	1.0	0.0	0.0	0.0	0.0	0.0	0.0	0.0	0.0	0.0	0.0	0.0	0.0	0.0	0.0	0.0	0.0	0.0	0.0	0.0
PYCR2	29920	symbol	H. sapiens	29920	H. sapiens	0.0	0.0	0.0	1.0	0.0	0.0	0.0	0.0	0.0	0.0	0.0	0.0	1.0	0.0	0.0	0.0	0.0	0.0	0.0	0.0
LBR	3930	symbol	H. sapiens	3930	H. sapiens	0.0	0.0	0.0	0.0	0.0	0.0	0.0	0.0	0.0	1.0	0.0	0.0	0.0	0.0	0.0	0.0	0.0	0.0	0.0	0.0
PDIA6	10130	symbol	H. sapiens	10130	H. sapiens	0.0	0.0	0.0	0.0	0.0	0.0	0.0	1.0	0.0	0.0	0.0	0.0	0.0	0.0	0.0	0.0	0.0	0.0	0.0	0.0
LIPT1	51601	symbol	H. sapiens	51601	H. sapiens	0.0	1.0	0.0	0.0	0.0	0.0	0.0	0.0	0.0	0.0	0.0	0.0	0.0	0.0	0.0	0.0	0.0	0.0	0.0	0.0
METTL21A	151194	symbol	H. sapiens	151194	H. sapiens	0.0	1.0	0.0	0.0	0.0	0.0	0.0	0.0	0.0	0.0	0.0	0.0	0.0	0.0	0.0	0.0	0.0	0.0	0.0	0.0
KANSL1L	151050	symbol	H. sapiens	151050	H. sapiens	0.0	1.0	0.0	0.0	0.0	0.0	0.0	0.0	0.0	0.0	0.0	0.0	0.0	0.0	0.0	0.0	0.0	0.0	0.0	0.0
HES6	55502	symbol	H. sapiens	55502	H. sapiens	0.0	0.0	0.0	0.0	0.0	0.0	0.0	0.0	0.0	0.0	0.0	0.0	0.0	0.0	0.0	0.0	0.0	0.0	0.0	0.0
TAMM41	132001	symbol	H. sapiens	132001	H. sapiens	0.0	0.0	0.0	1.0	0.0	0.0	0.0	0.0	0.0	1.0	0.0	0.0	0.0	0.0	0.0	0.0	0.0	0.0	0.0	0.0
GOLGA4	2803	symbol	H. sapiens	2803	H. sapiens	0.0	0.0	0.0	0.0	0.0	0.0	0.0	0.0	0.0	0.0	0.0	0.0	0.0	0.0	0.0	0.0	0.0	0.0	0.0	0.0
SHQ1	55164	symbol	H. sapiens	55164	H. sapiens	1.0	0.0	0.0	0.0	0.0	0.0	0.0	0.0	1.0	0.0	0.0	0.0	0.0	0.0	0.0	0.0	0.0	0.0	0.0	0.0
UBA3	9039	symbol	H. sapiens	9039	H. sapiens	0.0	0.0	0.0	0.0	0.0	0.0	0.0	1.0	0.0	0.0	0.0	0.0	0.0	0.0	0.0	0.0	0.0	0.0	0.0	0.0
ABHD10	55347	symbol	H. sapiens	55347	H. sapiens	0.0	0.0	0.0	1.0	0.0	0.0	0.0	0.0	0.0	0.0	0.0	0.0	0.0	0.0	0.0	0.0	0.0	0.0	0.0	0.0
ADPRH	141	symbol	H. sapiens	141	H. sapiens	0.0	0.0	0.0	0.0	0.0	0.0	1.0	0.0	0.0	0.0	0.0	0.0	0.0	0.0	0.0	0.0	0.0	0.0	0.0	0.0
TRPC1	7220	symbol	H. sapiens	7220	H. sapiens	0.0	0.0	0.0	0.0	0.0	0.0	0.0	0.0	0.0	0.0	0.0	0.0	0.0	0.0	0.0	0.0	0.0	0.0	0.0	0.0
KLHL8	57563	symbol	H. sapiens	57563	H. sapiens	0.0	0.0	0.0	0.0	0.0	0.0	0.0	0.0	0.0	0.0	0.0	0.0	0.0	1.0	0.0	0.0	0.0	0.0	0.0	0.0
TBCK	93627	symbol	H. sapiens	93627	H. sapiens	0.0	0.0	0.0	0.0	0.0	0.0	1.0	0.0	0.0	0.0	0.0	0.0	0.0	0.0	0.0	0.0	0.0	1.0	0.0	0.0
CAMK2D	817	symbol	H. sapiens	817	H. sapiens	0.0	1.0	0.0	0.0	0.0	0.0	0.0	1.0	0.0	0.0	0.0	0.0	0.0	0.0	0.0	0.0	0.0	1.0	0.0	0.0
ARHGAP26	23092	symbol	H. sapiens	23092	H. sapiens	0.0	0.0	0.0	0.0	0.0	0.0	1.0	0.0	0.0	0.0	0.0	0.0	0.0	0.0	0.0	0.0	0.0	1.0	0.0	0.0
RNF145	153830	symbol	H. sapiens	153830	H. sapiens	0.0	0.0	0.0	0.0	0.0	0.0	0.0	0.0	0.0	0.0	0.0	0.0	0.0	0.0	0.0	0.0	0.0	0.0	0.0	0.0
NHP2	55651	symbol	H. sapiens	55651	H. sapiens	1.0	0.0	0.0	0.0	0.0	0.0	0.0	0.0	0.0	0.0	0.0	0.0	0.0	0.0	0.0	1.0	0.0	0.0	0.0	0.0
RMND5B	64777	symbol	H. sapiens	64777	H. sapiens	0.0	0.0	0.0	0.0	0.0	0.0	0.0	0.0	0.0	0.0	0.0	0.0	0.0	1.0	0.0	0.0	0.0	0.0	0.0	0.0
TRIM41	90933	symbol	H. sapiens	90933	H. sapiens	0.0	0.0	0.0	0.0	0.0	0.0	0.0	0.0	0.0	0.0	0.0	0.0	0.0	0.0	0.0	0.0	0.0	0.0	0.0	0.0
RNF44	22838	symbol	H. sapiens	22838	H. sapiens	0.0	0.0	0.0	0.0	0.0	0.0	0.0	0.0	0.0	0.0	0.0	0.0	0.0	0.0	0.0	0.0	0.0	0.0	0.0	0.0
FAXC	84553	symbol	H. sapiens	84553	H. sapiens	0.0	0.0	0.0	0.0	0.0	0.0	0.0	0.0	0.0	0.0	0.0	0.0	0.0	0.0	0.0	0.0	0.0	0.0	0.0	0.0
LUC7L2	51631	symbol	H. sapiens	51631	H. sapiens	1.0	0.0	0.0	0.0	0.0	0.0	0.0	0.0	1.0	0.0	0.0	0.0	0.0	0.0	0.0	0.0	0.0	0.0	0.0	0.0
RBMX	27316	symbol	H. sapiens	27316	H. sapiens	1.0	0.0	0.0	0.0	0.0	0.0	0.0	1.0	1.0	0.0	0.0	0.0	0.0	0.0	0.0	0.0	0.0	0.0	0.0	0.0
TACC1	6867	symbol	H. sapiens	6867	H. sapiens	0.0	0.0	0.0	0.0	0.0	0.0	0.0	0.0	0.0	0.0	0.0	1.0	0.0	0.0	0.0	0.0	0.0	0.0	0.0	0.0
NSD3	54904	symbol	H. sapiens	54904	H. sapiens	0.0	1.0	0.0	0.0	0.0	0.0	0.0	0.0	0.0	0.0	0.0	0.0	0.0	0.0	0.0	0.0	0.0	0.0	0.0	0.0
FAM83A	84985	symbol	H. sapiens	84985	H. sapiens	0.0	0.0	0.0	0.0	0.0	0.0	0.0	0.0	0.0	0.0	0.0	0.0	0.0	0.0	0.0	0.0	0.0	0.0	0.0	0.0
VLDLR	7436	symbol	H. sapiens	7436	H. sapiens	0.0	0.0	0.0	0.0	0.0	0.0	0.0	0.0	0.0	0.0	0.0	0.0	0.0	1.0	0.0	0.0	0.0	0.0	0.0	0.0
ZCCHC7	84186	symbol	H. sapiens	84186	H. sapiens	0.0	0.0	0.0	0.0	0.0	0.0	0.0	0.0	0.0	0.0	0.0	0.0	0.0	0.0	0.0	0.0	0.0	0.0	0.0	0.0
SIGMAR1	10280	symbol	H. sapiens	10280	H. sapiens	0.0	0.0	0.0	0.0	0.0	0.0	0.0	0.0	0.0	0.0	0.0	0.0	0.0	0.0	0.0	0.0	0.0	0.0	0.0	0.0
CBWD5	220869	symbol	H. sapiens	220869	H. sapiens	0.0	0.0	0.0	0.0	0.0	0.0	0.0	0.0	0.0	0.0	0.0	0.0	0.0	0.0	0.0	0.0	0.0	0.0	0.0	0.0
IDNK	414328	symbol	H. sapiens	414328	H. sapiens	0.0	0.0	0.0	1.0	0.0	0.0	0.0	0.0	0.0	0.0	0.0	0.0	0.0	0.0	0.0	0.0	0.0	0.0	0.0	0.0
INIP	58493	symbol	H. sapiens	58493	H. sapiens	0.0	0.0	0.0	0.0	0.0	0.0	0.0	0.0	0.0	0.0	0.0	0.0	0.0	0.0	0.0	0.0	0.0	0.0	0.0	0.0
WDR31	114987	symbol	H. sapiens	114987	H. sapiens	0.0	0.0	0.0	0.0	0.0	0.0	0.0	0.0	0.0	0.0	0.0	0.0	0.0	0.0	0.0	0.0	0.0	0.0	0.0	0.0
NTMT1	28989	symbol	H. sapiens	28989	H. sapiens	0.0	1.0	0.0	0.0	0.0	0.0	0.0	0.0	0.0	0.0	0.0	1.0	0.0	0.0	0.0	0.0	0.0	0.0	0.0	0.0
COMMD3	23412	symbol	H. sapiens	23412	H. sapiens	0.0	0.0	0.0	0.0	0.0	0.0	0.0	0.0	0.0	0.0	0.0	0.0	0.0	0.0	0.0	0.0	0.0	0.0	0.0	0.0
RSU1	6251	symbol	H. sapiens	6251	H. sapiens	0.0	0.0	0.0	0.0	0.0	0.0	1.0	0.0	0.0	0.0	0.0	0.0	0.0	0.0	0.0	0.0	0.0	0.0	0.0	0.0
PARD3	56288	symbol	H. sapiens	56288	H. sapiens	0.0	0.0	0.0	0.0	0.0	1.0	0.0	0.0	0.0	0.0	0.0	1.0	0.0	0.0	0.0	0.0	0.0	0.0	1.0	0.0
TCF7L2	6934	symbol	H. sapiens	6934	H. sapiens	0.0	0.0	0.0	1.0	1.0	0.0	0.0	1.0	0.0	0.0	0.0	0.0	0.0	0.0	0.0	0.0	0.0	0.0	0.0	0.0
HSD17B12	51144	symbol	H. sapiens	51144	H. sapiens	0.0	0.0	0.0	1.0	0.0	0.0	0.0	0.0	0.0	1.0	0.0	0.0	1.0	0.0	0.0	0.0	0.0	0.0	0.0	0.0
ZC3H12C	85463	symbol	H. sapiens	85463	H. sapiens	0.0	0.0	0.0	0.0	0.0	0.0	0.0	0.0	0.0	0.0	0.0	0.0	0.0	0.0	0.0	0.0	0.0	0.0	0.0	0.0
TKFC	26007	symbol	H. sapiens	26007	H. sapiens	0.0	0.0	0.0	1.0	0.0	0.0	0.0	1.0	0.0	0.0	0.0	0.0	0.0	0.0	0.0	0.0	0.0	0.0	0.0	0.0
ROM1	6094	symbol	H. sapiens	6094	H. sapiens	0.0	0.0	0.0	0.0	0.0	0.0	0.0	0.0	0.0	0.0	0.0	0.0	0.0	0.0	0.0	0.0	0.0	0.0	0.0	0.0
CHEK1	1111	symbol	H. sapiens	1111	H. sapiens	0.0	1.0	0.0	0.0	1.0	0.0	0.0	1.0	0.0	0.0	0.0	1.0	0.0	0.0	0.0	0.0	0.0	0.0	0.0	0.0
ORAOV1	220064	gene_synonym	H. sapiens	220064	H. sapiens	1.0	0.0	0.0	0.0	0.0	0.0	0.0	0.0	0.0	0.0	0.0	0.0	0.0	0.0	0.0	0.0	0.0	0.0	0.0	0.0
TM7SF2	7108	symbol	H. sapiens	7108	H. sapiens	0.0	0.0	0.0	0.0	0.0	0.0	0.0	1.0	0.0	1.0	0.0	0.0	0.0	0.0	0.0	0.0	0.0	0.0	0.0	0.0
MPP7	143098	symbol	H. sapiens	143098	H. sapiens	0.0	0.0	0.0	0.0	0.0	0.0	0.0	0.0	0.0	0.0	0.0	0.0	0.0	0.0	0.0	0.0	0.0	0.0	0.0	0.0
FCGR1A	2209	symbol	H. sapiens	2209	H. sapiens	0.0	0.0	0.0	0.0	0.0	0.0	0.0	1.0	0.0	0.0	0.0	0.0	0.0	0.0	0.0	0.0	0.0	0.0	0.0	0.0
LYPD1	116372	symbol	H. sapiens	116372	H. sapiens	0.0	0.0	0.0	0.0	0.0	0.0	0.0	0.0	0.0	0.0	0.0	0.0	0.0	0.0	0.0	0.0	0.0	0.0	0.0	0.0
WDR17	116966	symbol	H. sapiens	116966	H. sapiens	0.0	0.0	0.0	0.0	0.0	0.0	0.0	0.0	0.0	0.0	0.0	0.0	0.0	0.0	0.0	0.0	0.0	0.0	0.0	0.0
DOCK1	1793	symbol	H. sapiens	1793	H. sapiens	0.0	0.0	0.0	0.0	0.0	0.0	1.0	1.0	0.0	0.0	0.0	0.0	0.0	0.0	0.0	0.0	0.0	0.0	0.0	0.0
DIXDC1	85458	symbol	H. sapiens	85458	H. sapiens	0.0	0.0	0.0	0.0	0.0	0.0	0.0	1.0	0.0	0.0	0.0	1.0	0.0	0.0	0.0	0.0	0.0	1.0	0.0	0.0
C11orf57	55216	gene_synonym	H. sapiens	55216	H. sapiens	0.0	0.0	0.0	0.0	0.0	0.0	0.0	0.0	0.0	0.0	0.0	0.0	0.0	0.0	0.0	0.0	0.0	0.0	0.0	0.0
SEC24D	9871	symbol	H. sapiens	9871	H. sapiens	0.0	0.0	0.0	0.0	0.0	1.0	0.0	1.0	0.0	0.0	0.0	0.0	0.0	0.0	0.0	0.0	0.0	0.0	0.0	0.0
DHX37	57647	symbol	H. sapiens	57647	H. sapiens	1.0	0.0	0.0	0.0	0.0	0.0	0.0	0.0	0.0	0.0	0.0	0.0	0.0	0.0	0.0	0.0	0.0	0.0	0.0	0.0
ITPR1	3708	symbol	H. sapiens	3708	H. sapiens	0.0	0.0	0.0	0.0	0.0	0.0	0.0	0.0	0.0	0.0	0.0	0.0	0.0	0.0	0.0	0.0	1.0	0.0	0.0	0.0
THRB	7068	symbol	H. sapiens	7068	H. sapiens	0.0	0.0	0.0	0.0	0.0	0.0	0.0	1.0	0.0	0.0	0.0	0.0	0.0	0.0	0.0	0.0	0.0	0.0	0.0	0.0
UBE3B	89910	symbol	H. sapiens	89910	H. sapiens	0.0	0.0	0.0	0.0	0.0	0.0	0.0	0.0	0.0	0.0	0.0	0.0	0.0	1.0	0.0	0.0	0.0	0.0	0.0	0.0
TWF1	5756	symbol	H. sapiens	5756	H. sapiens	0.0	0.0	1.0	0.0	0.0	0.0	0.0	0.0	0.0	0.0	0.0	1.0	0.0	0.0	0.0	0.0	0.0	1.0	0.0	0.0
CSNK1G3	1456	symbol	H. sapiens	1456	H. sapiens	0.0	0.0	0.0	0.0	0.0	0.0	0.0	1.0	0.0	0.0	0.0	0.0	0.0	0.0	0.0	0.0	0.0	0.0	0.0	0.0
TMEM18	129787	symbol	H. sapiens	129787	H. sapiens	0.0	0.0	0.0	0.0	0.0	0.0	0.0	0.0	0.0	0.0	0.0	0.0	0.0	0.0	0.0	0.0	0.0	0.0	0.0	0.0
NDUFC2	4718	symbol	H. sapiens	4718	H. sapiens	0.0	0.0	0.0	1.0	0.0	0.0	0.0	0.0	0.0	0.0	0.0	0.0	0.0	0.0	0.0	0.0	0.0	0.0	1.0	0.0
ADAMTS12	81792	symbol	H. sapiens	81792	H. sapiens	0.0	0.0	0.0	0.0	0.0	0.0	0.0	1.0	0.0	0.0	0.0	0.0	0.0	1.0	0.0	0.0	0.0	0.0	0.0	0.0
ANKRD50	57182	symbol	H. sapiens	57182	H. sapiens	0.0	0.0	0.0	0.0	0.0	0.0	0.0	0.0	0.0	0.0	0.0	0.0	0.0	0.0	0.0	0.0	0.0	0.0	0.0	0.0
SCLT1	132320	symbol	H. sapiens	132320	H. sapiens	0.0	0.0	1.0	0.0	0.0	1.0	0.0	0.0	0.0	0.0	0.0	0.0	0.0	0.0	0.0	0.0	0.0	0.0	0.0	0.0
EPS8	2059	symbol	H. sapiens	2059	H. sapiens	0.0	0.0	1.0	0.0	1.0	0.0	0.0	0.0	0.0	0.0	0.0	1.0	0.0	0.0	0.0	0.0	0.0	1.0	0.0	0.0
NCAPD3	23310	symbol	H. sapiens	23310	H. sapiens	0.0	0.0	0.0	0.0	0.0	0.0	0.0	0.0	0.0	0.0	0.0	0.0	0.0	0.0	0.0	0.0	0.0	0.0	0.0	0.0
QDPR	5860	symbol	H. sapiens	5860	H. sapiens	0.0	0.0	0.0	1.0	0.0	0.0	0.0	0.0	0.0	0.0	0.0	0.0	1.0	0.0	0.0	0.0	0.0	0.0	0.0	0.0
ZNF827	152485	symbol	H. sapiens	152485	H. sapiens	0.0	0.0	0.0	0.0	0.0	0.0	0.0	0.0	0.0	0.0	0.0	0.0	0.0	0.0	0.0	0.0	0.0	0.0	0.0	0.0
BICD1	636	symbol	H. sapiens	636	H. sapiens	1.0	0.0	0.0	0.0	0.0	1.0	0.0	0.0	1.0	0.0	1.0	1.0	0.0	0.0	0.0	0.0	0.0	0.0	0.0	0.0
NBAS	51594	symbol	H. sapiens	51594	H. sapiens	0.0	0.0	0.0	1.0	0.0	0.0	0.0	1.0	0.0	0.0	0.0	0.0	0.0	0.0	0.0	0.0	0.0	0.0	0.0	0.0
CACUL1	143384	symbol	H. sapiens	143384	H. sapiens	0.0	0.0	0.0	0.0	1.0	0.0	0.0	0.0	0.0	0.0	0.0	0.0	0.0	1.0	0.0	0.0	0.0	0.0	0.0	0.0
TIAL1	7073	symbol	H. sapiens	7073	H. sapiens	0.0	0.0	0.0	0.0	0.0	0.0	0.0	0.0	0.0	0.0	0.0	0.0	0.0	0.0	0.0	0.0	0.0	0.0	0.0	0.0
ARL14EP	120534	symbol	H. sapiens	120534	H. sapiens	0.0	0.0	0.0	0.0	0.0	0.0	0.0	0.0	0.0	0.0	0.0	0.0	0.0	0.0	0.0	0.0	0.0	0.0	0.0	0.0
ATP5A1	498	gene_synonym	H. sapiens	498	H. sapiens	0.0	0.0	0.0	1.0	0.0	0.0	0.0	0.0	0.0	0.0	0.0	0.0	0.0	0.0	0.0	0.0	0.0	0.0	1.0	0.0
PDE3B	5140	symbol	H. sapiens	5140	H. sapiens	0.0	0.0	0.0	0.0	0.0	0.0	0.0	0.0	0.0	0.0	0.0	0.0	0.0	0.0	0.0	0.0	0.0	0.0	0.0	0.0
POC5	134359	symbol	H. sapiens	134359	H. sapiens	0.0	0.0	0.0	0.0	0.0	0.0	0.0	0.0	0.0	0.0	0.0	0.0	0.0	0.0	0.0	0.0	0.0	0.0	0.0	0.0
SPOCK1	6695	symbol	H. sapiens	6695	H. sapiens	0.0	0.0	0.0	0.0	0.0	0.0	0.0	0.0	0.0	0.0	0.0	0.0	0.0	0.0	0.0	0.0	0.0	0.0	0.0	0.0
FAM151B	167555	symbol	H. sapiens	167555	H. sapiens	0.0	0.0	0.0	0.0	0.0	0.0	0.0	0.0	0.0	0.0	0.0	0.0	0.0	0.0	0.0	0.0	0.0	0.0	0.0	0.0
CWF19L2	143884	symbol	H. sapiens	143884	H. sapiens	0.0	0.0	0.0	0.0	0.0	0.0	0.0	0.0	1.0	0.0	0.0	0.0	0.0	0.0	0.0	0.0	0.0	0.0	0.0	0.0
PLEKHH2	130271	symbol	H. sapiens	130271	H. sapiens	0.0	0.0	0.0	0.0	0.0	0.0	0.0	0.0	0.0	0.0	0.0	1.0	0.0	0.0	0.0	0.0	0.0	1.0	0.0	0.0
NADK2	133686	symbol	H. sapiens	133686	H. sapiens	0.0	0.0	0.0	1.0	0.0	0.0	0.0	0.0	0.0	0.0	0.0	0.0	0.0	0.0	0.0	0.0	0.0	0.0	0.0	0.0
SLC30A6	55676	symbol	H. sapiens	55676	H. sapiens	0.0	0.0	0.0	0.0	0.0	0.0	0.0	0.0	0.0	0.0	0.0	0.0	0.0	0.0	0.0	0.0	0.0	0.0	0.0	0.0
PTPRK	5796	symbol	H. sapiens	5796	H. sapiens	0.0	0.0	0.0	0.0	1.0	0.0	0.0	0.0	0.0	0.0	0.0	0.0	0.0	0.0	0.0	0.0	0.0	0.0	0.0	0.0
GGPS1	9453	symbol	H. sapiens	9453	H. sapiens	0.0	0.0	0.0	1.0	0.0	0.0	0.0	1.0	0.0	1.0	0.0	0.0	0.0	0.0	0.0	0.0	0.0	0.0	0.0	0.0
MED21	9412	symbol	H. sapiens	9412	H. sapiens	0.0	0.0	0.0	0.0	0.0	0.0	0.0	0.0	0.0	0.0	0.0	0.0	0.0	0.0	0.0	0.0	0.0	0.0	0.0	0.0
CDYL	9425	symbol	H. sapiens	9425	H. sapiens	0.0	0.0	0.0	0.0	0.0	0.0	0.0	0.0	0.0	0.0	0.0	0.0	0.0	0.0	0.0	0.0	0.0	0.0	0.0	0.0
NMRAL1	57407	symbol	H. sapiens	57407	H. sapiens	0.0	0.0	0.0	0.0	0.0	0.0	0.0	0.0	0.0	0.0	0.0	0.0	0.0	0.0	0.0	0.0	0.0	0.0	0.0	0.0
FBXL2	25827	symbol	H. sapiens	25827	H. sapiens	0.0	0.0	0.0	0.0	0.0	0.0	0.0	1.0	0.0	0.0	0.0	0.0	0.0	1.0	0.0	0.0	1.0	0.0	0.0	0.0
KCTD15	79047	symbol	H. sapiens	79047	H. sapiens	0.0	0.0	0.0	0.0	0.0	0.0	0.0	0.0	0.0	0.0	0.0	0.0	0.0	0.0	0.0	0.0	0.0	0.0	0.0	0.0
MCOLN2	255231	symbol	H. sapiens	255231	H. sapiens	0.0	0.0	0.0	0.0	0.0	0.0	0.0	0.0	0.0	0.0	0.0	0.0	0.0	0.0	0.0	0.0	0.0	0.0	0.0	0.0
SREK1	140890	symbol	H. sapiens	140890	H. sapiens	0.0	0.0	0.0	0.0	0.0	0.0	0.0	1.0	1.0	0.0	0.0	0.0	0.0	0.0	0.0	0.0	0.0	0.0	0.0	0.0
HS2ST1	9653	symbol	H. sapiens	9653	H. sapiens	0.0	0.0	0.0	1.0	0.0	0.0	0.0	0.0	0.0	0.0	0.0	0.0	0.0	0.0	0.0	0.0	0.0	0.0	0.0	0.0
MSI2	124540	symbol	H. sapiens	124540	H. sapiens	0.0	0.0	0.0	0.0	0.0	0.0	0.0	1.0	0.0	0.0	0.0	0.0	0.0	0.0	0.0	0.0	0.0	0.0	0.0	0.0
PPP2R5E	5529	symbol	H. sapiens	5529	H. sapiens	0.0	0.0	0.0	0.0	0.0	0.0	0.0	0.0	0.0	0.0	0.0	0.0	0.0	0.0	0.0	0.0	0.0	0.0	0.0	0.0
C16orf74	404550	symbol	H. sapiens	404550	H. sapiens	0.0	0.0	0.0	0.0	0.0	0.0	0.0	0.0	0.0	0.0	0.0	0.0	0.0	0.0	0.0	0.0	0.0	0.0	0.0	0.0
ABCA5	23461	symbol	H. sapiens	23461	H. sapiens	0.0	0.0	0.0	0.0	0.0	0.0	0.0	0.0	0.0	0.0	0.0	0.0	0.0	0.0	0.0	0.0	0.0	0.0	0.0	0.0
LONRF1	91694	symbol	H. sapiens	91694	H. sapiens	0.0	0.0	0.0	0.0	0.0	0.0	0.0	0.0	0.0	0.0	0.0	0.0	0.0	1.0	0.0	0.0	0.0	0.0	0.0	0.0
BTG3	10950	symbol	H. sapiens	10950	H. sapiens	0.0	0.0	0.0	0.0	1.0	0.0	0.0	0.0	0.0	0.0	0.0	0.0	0.0	0.0	0.0	0.0	0.0	0.0	0.0	0.0
DPH3	285381	symbol	H. sapiens	285381	H. sapiens	1.0	0.0	0.0	0.0	0.0	0.0	0.0	0.0	0.0	0.0	0.0	0.0	0.0	0.0	0.0	1.0	0.0	0.0	0.0	0.0
CXXC1	30827	symbol	H. sapiens	30827	H. sapiens	0.0	1.0	0.0	0.0	0.0	0.0	0.0	0.0	0.0	0.0	0.0	0.0	0.0	0.0	0.0	0.0	0.0	0.0	0.0	0.0
MPPE1	65258	symbol	H. sapiens	65258	H. sapiens	0.0	0.0	0.0	1.0	0.0	0.0	0.0	0.0	0.0	1.0	0.0	0.0	0.0	0.0	0.0	0.0	0.0	0.0	0.0	0.0
ZCCHC10	54819	symbol	H. sapiens	54819	H. sapiens	0.0	0.0	0.0	0.0	0.0	0.0	0.0	0.0	0.0	0.0	0.0	0.0	0.0	0.0	0.0	0.0	0.0	0.0	0.0	0.0
SLC16A1	6566	symbol	H. sapiens	6566	H. sapiens	0.0	0.0	0.0	1.0	0.0	0.0	0.0	0.0	0.0	0.0	0.0	1.0	0.0	0.0	0.0	0.0	0.0	0.0	0.0	0.0
SETD9	133383	symbol	H. sapiens	133383	H. sapiens	0.0	1.0	0.0	0.0	0.0	0.0	0.0	0.0	0.0	0.0	0.0	0.0	0.0	0.0	0.0	0.0	0.0	0.0	0.0	0.0
C9orf85	138241	symbol	H. sapiens	138241	H. sapiens	0.0	0.0	0.0	0.0	0.0	0.0	0.0	0.0	0.0	0.0	0.0	0.0	0.0	0.0	0.0	0.0	0.0	0.0	0.0	0.0
PPARGC1B	133522	symbol	H. sapiens	133522	H. sapiens	0.0	0.0	0.0	0.0	0.0	0.0	1.0	0.0	0.0	0.0	0.0	0.0	0.0	0.0	1.0	0.0	0.0	1.0	0.0	0.0
CCT8	10694	symbol	H. sapiens	10694	H. sapiens	0.0	1.0	0.0	0.0	0.0	0.0	0.0	0.0	0.0	0.0	0.0	0.0	0.0	0.0	0.0	0.0	0.0	0.0	1.0	0.0
CDK20	23552	symbol	H. sapiens	23552	H. sapiens	0.0	0.0	0.0	0.0	0.0	0.0	0.0	0.0	0.0	0.0	0.0	0.0	0.0	0.0	0.0	0.0	0.0	0.0	0.0	0.0
PTDSS1	9791	symbol	H. sapiens	9791	H. sapiens	0.0	0.0	0.0	1.0	0.0	0.0	0.0	0.0	0.0	1.0	0.0	0.0	1.0	0.0	0.0	0.0	0.0	0.0	0.0	0.0
VPS8	23355	symbol	H. sapiens	23355	H. sapiens	0.0	0.0	0.0	0.0	0.0	1.0	0.0	0.0	0.0	0.0	0.0	0.0	0.0	0.0	0.0	0.0	0.0	0.0	0.0	0.0
SEC13	6396	symbol	H. sapiens	6396	H. sapiens	0.0	0.0	0.0	1.0	0.0	1.0	0.0	1.0	0.0	0.0	0.0	0.0	0.0	0.0	0.0	0.0	0.0	0.0	0.0	0.0
LRP8	7804	symbol	H. sapiens	7804	H. sapiens	0.0	0.0	0.0	0.0	0.0	0.0	0.0	1.0	0.0	0.0	0.0	0.0	0.0	0.0	0.0	0.0	0.0	0.0	0.0	0.0
DHRS4	10901	symbol	H. sapiens	10901	H. sapiens	0.0	0.0	0.0	0.0	0.0	0.0	0.0	1.0	0.0	0.0	0.0	0.0	0.0	0.0	0.0	0.0	0.0	0.0	1.0	0.0
FUK	197258	gene_synonym	H. sapiens	197258	H. sapiens	0.0	0.0	0.0	1.0	0.0	0.0	0.0	0.0	0.0	0.0	0.0	0.0	0.0	0.0	0.0	0.0	0.0	0.0	0.0	0.0
AASDH	132949	symbol	H. sapiens	132949	H. sapiens	0.0	0.0	0.0	1.0	0.0	0.0	0.0	0.0	0.0	0.0	0.0	0.0	1.0	0.0	0.0	0.0	0.0	0.0	0.0	0.0
DSCR3	10311	gene_synonym	H. sapiens	10311	H. sapiens	0.0	0.0	0.0	0.0	0.0	0.0	0.0	0.0	0.0	0.0	0.0	0.0	0.0	0.0	0.0	0.0	0.0	0.0	0.0	0.0
PSMG3	84262	symbol	H. sapiens	84262	H. sapiens	0.0	0.0	0.0	0.0	0.0	0.0	0.0	0.0	0.0	0.0	0.0	0.0	0.0	0.0	0.0	0.0	0.0	0.0	0.0	0.0
FAM213B	127281	gene_synonym	H. sapiens	127281	H. sapiens	0.0	0.0	0.0	1.0	0.0	0.0	0.0	0.0	0.0	1.0	0.0	0.0	0.0	0.0	0.0	0.0	0.0	0.0	0.0	0.0
C12orf43	64897	symbol	H. sapiens	64897	H. sapiens	0.0	0.0	0.0	0.0	0.0	0.0	0.0	1.0	0.0	0.0	0.0	0.0	0.0	0.0	0.0	0.0	0.0	0.0	0.0	0.0
WIPI2	26100	symbol	H. sapiens	26100	H. sapiens	0.0	0.0	0.0	0.0	0.0	0.0	0.0	1.0	0.0	1.0	0.0	0.0	0.0	0.0	0.0	0.0	1.0	0.0	1.0	1.0
PAFAH2	5051	symbol	H. sapiens	5051	H. sapiens	0.0	0.0	0.0	0.0	0.0	0.0	0.0	0.0	0.0	0.0	0.0	0.0	0.0	0.0	0.0	0.0	0.0	0.0	0.0	0.0
PTPDC1	138639	symbol	H. sapiens	138639	H. sapiens	0.0	0.0	1.0	0.0	0.0	0.0	0.0	0.0	0.0	0.0	0.0	0.0	0.0	0.0	0.0	0.0	0.0	0.0	0.0	0.0
NCK1	4690	symbol	H. sapiens	4690	H. sapiens	0.0	0.0	1.0	0.0	0.0	0.0	0.0	1.0	0.0	0.0	0.0	1.0	0.0	0.0	0.0	0.0	0.0	1.0	0.0	0.0
MRAS	22808	symbol	H. sapiens	22808	H. sapiens	0.0	0.0	0.0	0.0	0.0	0.0	0.0	0.0	0.0	0.0	0.0	0.0	0.0	0.0	0.0	0.0	0.0	1.0	0.0	0.0
RNF207	388591	symbol	H. sapiens	388591	H. sapiens	0.0	0.0	0.0	0.0	0.0	0.0	0.0	1.0	0.0	0.0	0.0	0.0	0.0	0.0	0.0	0.0	0.0	1.0	0.0	0.0
CDC25C	995	symbol	H. sapiens	995	H. sapiens	0.0	0.0	0.0	0.0	1.0	0.0	0.0	0.0	0.0	0.0	0.0	0.0	0.0	0.0	0.0	0.0	0.0	0.0	0.0	0.0
AHCYL2	23382	symbol	H. sapiens	23382	H. sapiens	0.0	0.0	0.0	1.0	0.0	0.0	0.0	0.0	0.0	0.0	0.0	0.0	1.0	0.0	0.0	0.0	0.0	0.0	0.0	0.0
ZFAND2B	130617	symbol	H. sapiens	130617	H. sapiens	0.0	0.0	0.0	0.0	0.0	0.0	0.0	0.0	0.0	0.0	0.0	0.0	0.0	1.0	0.0	0.0	0.0	0.0	1.0	0.0
CDC42SE2	56990	symbol	H. sapiens	56990	H. sapiens	0.0	0.0	0.0	0.0	0.0	0.0	0.0	0.0	0.0	0.0	0.0	0.0	0.0	0.0	0.0	0.0	0.0	0.0	0.0	0.0
PAXBP1	94104	symbol	H. sapiens	94104	H. sapiens	0.0	1.0	0.0	0.0	0.0	0.0	0.0	0.0	0.0	0.0	0.0	0.0	0.0	0.0	0.0	0.0	0.0	0.0	0.0	0.0
GART	2618	symbol	H. sapiens	2618	H. sapiens	0.0	0.0	0.0	1.0	0.0	0.0	0.0	0.0	0.0	0.0	0.0	0.0	1.0	0.0	0.0	0.0	0.0	0.0	0.0	0.0
SON	6651	symbol	H. sapiens	6651	H. sapiens	0.0	0.0	0.0	0.0	0.0	0.0	0.0	1.0	1.0	0.0	0.0	1.0	0.0	0.0	0.0	0.0	0.0	0.0	0.0	0.0
ATP5G1	516	gene_synonym	H. sapiens	516	H. sapiens	0.0	0.0	0.0	1.0	0.0	0.0	0.0	0.0	0.0	0.0	0.0	0.0	0.0	0.0	0.0	0.0	0.0	0.0	1.0	0.0
CIART	148523	symbol	H. sapiens	148523	H. sapiens	0.0	0.0	0.0	0.0	0.0	0.0	0.0	0.0	0.0	0.0	0.0	0.0	0.0	0.0	0.0	0.0	0.0	0.0	0.0	0.0
SNF8	11267	symbol	H. sapiens	11267	H. sapiens	0.0	0.0	0.0	0.0	0.0	1.0	0.0	0.0	0.0	0.0	0.0	0.0	0.0	1.0	0.0	0.0	1.0	0.0	1.0	0.0
CYB5R1	51706	symbol	H. sapiens	51706	H. sapiens	0.0	0.0	0.0	0.0	0.0	0.0	0.0	0.0	0.0	1.0	0.0	0.0	0.0	0.0	0.0	0.0	0.0	0.0	0.0	0.0
CHCHD6	84303	symbol	H. sapiens	84303	H. sapiens	0.0	0.0	0.0	0.0	0.0	0.0	0.0	0.0	0.0	0.0	0.0	0.0	0.0	0.0	0.0	0.0	0.0	0.0	1.0	0.0
BSDC1	55108	symbol	H. sapiens	55108	H. sapiens	0.0	0.0	0.0	0.0	0.0	0.0	0.0	0.0	0.0	0.0	0.0	0.0	0.0	0.0	0.0	0.0	0.0	0.0	0.0	0.0
U2AF1	7307	symbol	H. sapiens	7307	H. sapiens	0.0	0.0	0.0	0.0	0.0	0.0	0.0	0.0	1.0	0.0	0.0	0.0	0.0	0.0	0.0	0.0	0.0	0.0	0.0	0.0
LSS	4047	symbol	H. sapiens	4047	H. sapiens	0.0	0.0	0.0	0.0	0.0	0.0	0.0	1.0	0.0	1.0	0.0	0.0	0.0	0.0	0.0	0.0	0.0	0.0	0.0	0.0
DIP2A	23181	symbol	H. sapiens	23181	H. sapiens	0.0	0.0	0.0	0.0	0.0	0.0	0.0	0.0	0.0	0.0	0.0	0.0	0.0	0.0	0.0	0.0	0.0	0.0	0.0	0.0
PRMT2	3275	symbol	H. sapiens	3275	H. sapiens	0.0	1.0	0.0	0.0	1.0	0.0	0.0	0.0	0.0	0.0	0.0	0.0	0.0	0.0	0.0	0.0	0.0	0.0	0.0	0.0
ZDHHC12	84885	symbol	H. sapiens	84885	H. sapiens	0.0	0.0	0.0	0.0	0.0	0.0	0.0	0.0	0.0	1.0	0.0	0.0	0.0	0.0	0.0	0.0	0.0	0.0	1.0	0.0
SAFB	6294	symbol	H. sapiens	6294	H. sapiens	0.0	0.0	0.0	0.0	0.0	0.0	0.0	1.0	1.0	0.0	0.0	0.0	0.0	0.0	0.0	0.0	0.0	0.0	0.0	0.0
FAM189B	10712	symbol	H. sapiens	10712	H. sapiens	0.0	0.0	0.0	0.0	0.0	0.0	0.0	0.0	0.0	0.0	0.0	0.0	0.0	0.0	0.0	0.0	0.0	0.0	0.0	0.0
PAQR6	79957	symbol	H. sapiens	79957	H. sapiens	0.0	0.0	0.0	0.0	0.0	0.0	0.0	0.0	0.0	0.0	0.0	0.0	0.0	0.0	0.0	0.0	0.0	0.0	0.0	0.0
NBEAL2	23218	symbol	H. sapiens	23218	H. sapiens	0.0	0.0	0.0	0.0	0.0	0.0	0.0	0.0	0.0	0.0	0.0	0.0	0.0	0.0	0.0	0.0	0.0	0.0	0.0	0.0
GPATCH4	54865	symbol	H. sapiens	54865	H. sapiens	0.0	0.0	0.0	0.0	0.0	0.0	0.0	0.0	0.0	0.0	0.0	0.0	0.0	0.0	0.0	0.0	0.0	0.0	0.0	0.0
PPP1R16A	84988	symbol	H. sapiens	84988	H. sapiens	0.0	0.0	0.0	0.0	0.0	0.0	0.0	0.0	0.0	0.0	0.0	0.0	0.0	0.0	0.0	0.0	0.0	0.0	0.0	0.0
MAML1	9794	symbol	H. sapiens	9794	H. sapiens	0.0	0.0	0.0	0.0	0.0	0.0	0.0	0.0	0.0	0.0	0.0	0.0	0.0	0.0	0.0	0.0	0.0	0.0	0.0	0.0
PCYT1A	5130	symbol	H. sapiens	5130	H. sapiens	0.0	0.0	0.0	1.0	0.0	0.0	0.0	0.0	0.0	1.0	0.0	0.0	0.0	0.0	0.0	0.0	0.0	0.0	0.0	0.0
DMKN	93099	symbol	H. sapiens	93099	H. sapiens	0.0	0.0	0.0	0.0	0.0	0.0	0.0	0.0	0.0	0.0	0.0	0.0	0.0	0.0	0.0	0.0	0.0	0.0	0.0	0.0
U2AF1L4	199746	symbol	H. sapiens	199746	H. sapiens	0.0	0.0	0.0	0.0	0.0	0.0	0.0	0.0	1.0	0.0	0.0	0.0	0.0	0.0	0.0	0.0	0.0	0.0	0.0	0.0
FDXR	2232	symbol	H. sapiens	2232	H. sapiens	0.0	0.0	0.0	1.0	0.0	0.0	0.0	1.0	0.0	1.0	0.0	0.0	0.0	0.0	0.0	0.0	0.0	0.0	0.0	0.0
SRSF2	6427	symbol	H. sapiens	6427	H. sapiens	0.0	0.0	0.0	0.0	0.0	0.0	0.0	1.0	1.0	0.0	0.0	0.0	0.0	0.0	0.0	0.0	0.0	0.0	0.0	0.0
TMEM143	55260	symbol	H. sapiens	55260	H. sapiens	0.0	0.0	0.0	0.0	0.0	0.0	0.0	0.0	0.0	0.0	0.0	0.0	0.0	0.0	0.0	0.0	0.0	0.0	0.0	0.0
JMJD8	339123	symbol	H. sapiens	339123	H. sapiens	0.0	0.0	0.0	1.0	0.0	0.0	0.0	1.0	0.0	0.0	0.0	0.0	0.0	0.0	0.0	0.0	0.0	0.0	0.0	0.0
CCDC78	124093	symbol	H. sapiens	124093	H. sapiens	0.0	0.0	0.0	0.0	0.0	0.0	0.0	0.0	0.0	0.0	0.0	1.0	0.0	0.0	0.0	0.0	0.0	0.0	0.0	0.0
SPSB3	90864	symbol	H. sapiens	90864	H. sapiens	0.0	0.0	0.0	0.0	0.0	0.0	0.0	1.0	0.0	0.0	0.0	0.0	0.0	1.0	0.0	0.0	0.0	0.0	0.0	0.0
CLPB	81570	symbol	H. sapiens	81570	H. sapiens	0.0	0.0	0.0	0.0	0.0	0.0	0.0	0.0	0.0	0.0	0.0	0.0	0.0	0.0	0.0	0.0	0.0	0.0	0.0	0.0
ASRGL1	80150	symbol	H. sapiens	80150	H. sapiens	0.0	0.0	0.0	1.0	0.0	0.0	0.0	0.0	0.0	0.0	0.0	0.0	1.0	0.0	0.0	0.0	0.0	0.0	0.0	0.0
C1orf123	54987	gene_synonym	H. sapiens	54987	H. sapiens	0.0	0.0	0.0	0.0	0.0	0.0	0.0	0.0	0.0	0.0	0.0	0.0	0.0	0.0	0.0	0.0	0.0	0.0	0.0	0.0
GMEB1	10691	symbol	H. sapiens	10691	H. sapiens	0.0	0.0	0.0	0.0	0.0	0.0	0.0	0.0	0.0	0.0	0.0	0.0	0.0	0.0	0.0	0.0	0.0	0.0	0.0	0.0
FAAP20	199990	symbol	H. sapiens	199990	H. sapiens	0.0	0.0	0.0	0.0	0.0	0.0	0.0	0.0	0.0	0.0	0.0	0.0	0.0	0.0	0.0	0.0	0.0	0.0	0.0	0.0
NFIA	4774	symbol	H. sapiens	4774	H. sapiens	0.0	0.0	0.0	0.0	0.0	0.0	0.0	0.0	0.0	0.0	0.0	0.0	0.0	0.0	0.0	0.0	0.0	0.0	0.0	0.0
MYSM1	114803	symbol	H. sapiens	114803	H. sapiens	0.0	1.0	0.0	0.0	0.0	0.0	0.0	1.0	0.0	0.0	0.0	0.0	0.0	0.0	0.0	0.0	0.0	0.0	0.0	0.0
C1orf52	148423	symbol	H. sapiens	148423	H. sapiens	0.0	0.0	0.0	0.0	0.0	0.0	0.0	0.0	0.0	0.0	0.0	0.0	0.0	0.0	0.0	0.0	0.0	0.0	0.0	0.0
ZNF326	284695	symbol	H. sapiens	284695	H. sapiens	0.0	0.0	0.0	0.0	0.0	0.0	0.0	0.0	1.0	0.0	0.0	0.0	0.0	0.0	0.0	0.0	0.0	0.0	0.0	0.0
PEX19	5824	symbol	H. sapiens	5824	H. sapiens	0.0	0.0	0.0	0.0	0.0	0.0	0.0	0.0	0.0	0.0	0.0	0.0	0.0	0.0	0.0	0.0	0.0	0.0	1.0	0.0
ACP6	51205	symbol	H. sapiens	51205	H. sapiens	0.0	0.0	0.0	1.0	0.0	0.0	0.0	1.0	0.0	1.0	0.0	0.0	0.0	0.0	0.0	0.0	0.0	0.0	0.0	0.0
KIAA1841	84542	symbol	H. sapiens	84542	H. sapiens	0.0	0.0	0.0	0.0	0.0	0.0	0.0	0.0	0.0	0.0	0.0	0.0	0.0	0.0	0.0	0.0	0.0	0.0	0.0	0.0
TYW5	129450	symbol	H. sapiens	129450	H. sapiens	1.0	0.0	0.0	1.0	0.0	0.0	0.0	0.0	0.0	0.0	0.0	0.0	0.0	0.0	0.0	1.0	0.0	0.0	0.0	0.0
CFAP36	112942	symbol	H. sapiens	112942	H. sapiens	0.0	0.0	0.0	0.0	0.0	0.0	0.0	0.0	0.0	0.0	0.0	0.0	0.0	0.0	0.0	0.0	0.0	0.0	0.0	0.0
SMC6	79677	symbol	H. sapiens	79677	H. sapiens	0.0	0.0	0.0	0.0	0.0	0.0	0.0	0.0	0.0	0.0	0.0	0.0	0.0	0.0	0.0	0.0	0.0	0.0	0.0	0.0
SPATA18	132671	symbol	H. sapiens	132671	H. sapiens	0.0	0.0	0.0	0.0	0.0	0.0	0.0	0.0	0.0	0.0	0.0	0.0	0.0	1.0	0.0	0.0	1.0	0.0	1.0	1.0
SCNM1	79005	symbol	H. sapiens	79005	H. sapiens	0.0	0.0	0.0	0.0	0.0	0.0	0.0	0.0	1.0	0.0	0.0	0.0	0.0	0.0	0.0	0.0	0.0	0.0	0.0	0.0
TGFA	7039	symbol	H. sapiens	7039	H. sapiens	0.0	0.0	0.0	0.0	1.0	1.0	0.0	0.0	0.0	0.0	0.0	0.0	0.0	0.0	0.0	0.0	0.0	0.0	0.0	0.0
DCAF16	54876	symbol	H. sapiens	54876	H. sapiens	0.0	0.0	0.0	0.0	0.0	0.0	0.0	1.0	0.0	0.0	0.0	0.0	0.0	0.0	0.0	0.0	0.0	0.0	0.0	0.0
GNPDA2	132789	symbol	H. sapiens	132789	H. sapiens	0.0	0.0	0.0	1.0	0.0	0.0	0.0	0.0	0.0	0.0	0.0	0.0	0.0	0.0	0.0	0.0	0.0	0.0	0.0	0.0
HELQ	113510	symbol	H. sapiens	113510	H. sapiens	0.0	0.0	0.0	0.0	0.0	0.0	0.0	0.0	0.0	0.0	0.0	0.0	0.0	0.0	0.0	0.0	0.0	0.0	0.0	0.0
INAVA	55765	symbol	H. sapiens	55765	H. sapiens	0.0	0.0	0.0	0.0	0.0	0.0	0.0	1.0	0.0	0.0	0.0	0.0	0.0	0.0	0.0	0.0	0.0	0.0	0.0	0.0
EIF4E3	317649	symbol	H. sapiens	317649	H. sapiens	0.0	0.0	0.0	0.0	0.0	0.0	0.0	0.0	0.0	0.0	0.0	0.0	0.0	0.0	0.0	0.0	0.0	0.0	0.0	0.0
TMEM169	92691	symbol	H. sapiens	92691	H. sapiens	0.0	0.0	0.0	0.0	0.0	0.0	0.0	0.0	0.0	0.0	0.0	0.0	0.0	0.0	0.0	0.0	0.0	0.0	0.0	0.0
HDAC11	79885	symbol	H. sapiens	79885	H. sapiens	0.0	1.0	0.0	0.0	0.0	0.0	0.0	0.0	0.0	0.0	0.0	0.0	0.0	0.0	0.0	0.0	0.0	0.0	0.0	0.0
PRKCI	5584	symbol	H. sapiens	5584	H. sapiens	0.0	0.0	0.0	0.0	0.0	1.0	0.0	1.0	0.0	0.0	0.0	0.0	0.0	0.0	0.0	0.0	0.0	1.0	1.0	0.0
WDFY3	23001	symbol	H. sapiens	23001	H. sapiens	0.0	0.0	0.0	0.0	0.0	0.0	0.0	0.0	0.0	0.0	0.0	0.0	0.0	0.0	0.0	0.0	1.0	0.0	0.0	1.0
C4orf36	132989	symbol	H. sapiens	132989	H. sapiens	0.0	0.0	0.0	0.0	0.0	0.0	0.0	0.0	0.0	0.0	0.0	0.0	0.0	0.0	0.0	0.0	0.0	0.0	0.0	0.0
TIPARP	25976	symbol	H. sapiens	25976	H. sapiens	0.0	0.0	0.0	0.0	0.0	0.0	0.0	0.0	0.0	0.0	0.0	0.0	0.0	1.0	0.0	0.0	0.0	0.0	0.0	0.0
MTMR14	64419	symbol	H. sapiens	64419	H. sapiens	0.0	0.0	0.0	1.0	0.0	0.0	0.0	0.0	0.0	1.0	0.0	0.0	0.0	0.0	0.0	0.0	1.0	0.0	0.0	0.0
MTHFD2L	441024	symbol	H. sapiens	441024	H. sapiens	0.0	0.0	0.0	1.0	0.0	0.0	0.0	0.0	0.0	0.0	0.0	0.0	1.0	0.0	0.0	0.0	0.0	0.0	0.0	0.0
RCHY1	25898	symbol	H. sapiens	25898	H. sapiens	0.0	0.0	0.0	0.0	0.0	0.0	0.0	0.0	0.0	0.0	0.0	0.0	0.0	1.0	0.0	0.0	0.0	0.0	0.0	0.0
ZNF148	7707	symbol	H. sapiens	7707	H. sapiens	0.0	0.0	0.0	0.0	0.0	0.0	0.0	0.0	0.0	0.0	0.0	0.0	0.0	0.0	0.0	0.0	0.0	0.0	0.0	0.0
TMEM41A	90407	symbol	H. sapiens	90407	H. sapiens	0.0	0.0	0.0	0.0	0.0	0.0	0.0	0.0	0.0	0.0	0.0	0.0	0.0	0.0	0.0	0.0	0.0	0.0	0.0	0.0
IFT122	55764	symbol	H. sapiens	55764	H. sapiens	0.0	0.0	1.0	0.0	0.0	0.0	0.0	0.0	0.0	0.0	1.0	1.0	0.0	0.0	0.0	0.0	0.0	0.0	1.0	0.0
RPL39L	116832	symbol	H. sapiens	116832	H. sapiens	0.0	0.0	0.0	0.0	0.0	0.0	0.0	0.0	0.0	0.0	0.0	0.0	0.0	0.0	0.0	0.0	0.0	0.0	0.0	0.0
UVSSA	57654	symbol	H. sapiens	57654	H. sapiens	0.0	0.0	0.0	0.0	0.0	0.0	0.0	0.0	0.0	0.0	0.0	0.0	0.0	0.0	0.0	0.0	0.0	0.0	0.0	0.0
TEX264	51368	symbol	H. sapiens	51368	H. sapiens	0.0	0.0	0.0	0.0	0.0	0.0	0.0	0.0	0.0	0.0	0.0	0.0	0.0	0.0	0.0	0.0	1.0	0.0	0.0	1.0
POC1A	25886	symbol	H. sapiens	25886	H. sapiens	0.0	0.0	1.0	0.0	1.0	0.0	0.0	0.0	0.0	0.0	1.0	1.0	0.0	0.0	0.0	0.0	0.0	0.0	0.0	0.0
PPM1M	132160	symbol	H. sapiens	132160	H. sapiens	0.0	0.0	0.0	0.0	0.0	0.0	0.0	0.0	0.0	0.0	0.0	0.0	0.0	0.0	0.0	0.0	0.0	0.0	0.0	0.0
MAD2L1	4085	symbol	H. sapiens	4085	H. sapiens	0.0	1.0	0.0	0.0	1.0	1.0	0.0	1.0	0.0	0.0	0.0	1.0	0.0	1.0	0.0	0.0	0.0	0.0	0.0	0.0
SLC25A46	91137	symbol	H. sapiens	91137	H. sapiens	0.0	0.0	0.0	0.0	0.0	0.0	0.0	0.0	0.0	0.0	0.0	0.0	0.0	0.0	0.0	0.0	0.0	0.0	1.0	0.0
STARD4	134429	symbol	H. sapiens	134429	H. sapiens	0.0	0.0	0.0	1.0	0.0	0.0	0.0	1.0	0.0	1.0	0.0	0.0	0.0	0.0	0.0	0.0	0.0	0.0	0.0	0.0
ARSK	153642	symbol	H. sapiens	153642	H. sapiens	0.0	0.0	0.0	0.0	0.0	0.0	0.0	0.0	0.0	0.0	0.0	0.0	0.0	0.0	0.0	0.0	0.0	0.0	0.0	0.0
PRIMPOL	201973	symbol	H. sapiens	201973	H. sapiens	0.0	0.0	0.0	0.0	0.0	0.0	0.0	0.0	0.0	0.0	0.0	0.0	0.0	0.0	0.0	0.0	0.0	0.0	1.0	0.0
UTP15	84135	symbol	H. sapiens	84135	H. sapiens	1.0	0.0	0.0	0.0	0.0	0.0	0.0	0.0	0.0	0.0	0.0	0.0	0.0	0.0	0.0	0.0	0.0	0.0	0.0	0.0
LEAP2	116842	symbol	H. sapiens	116842	H. sapiens	0.0	0.0	0.0	0.0	0.0	0.0	0.0	0.0	0.0	0.0	0.0	0.0	0.0	0.0	0.0	0.0	0.0	0.0	0.0	0.0
SLC29A4	222962	symbol	H. sapiens	222962	H. sapiens	0.0	0.0	0.0	0.0	0.0	0.0	0.0	0.0	0.0	0.0	0.0	0.0	0.0	0.0	0.0	0.0	0.0	0.0	0.0	0.0
CTSB	1508	symbol	H. sapiens	1508	H. sapiens	0.0	0.0	0.0	0.0	0.0	0.0	0.0	1.0	0.0	0.0	0.0	0.0	0.0	1.0	0.0	0.0	0.0	0.0	0.0	0.0
SPIDR	23514	symbol	H. sapiens	23514	H. sapiens	0.0	0.0	0.0	0.0	0.0	0.0	0.0	0.0	0.0	0.0	0.0	0.0	0.0	0.0	0.0	0.0	0.0	0.0	1.0	0.0
ORC5	5001	symbol	H. sapiens	5001	H. sapiens	0.0	0.0	0.0	0.0	1.0	0.0	0.0	0.0	0.0	0.0	0.0	0.0	0.0	0.0	0.0	0.0	0.0	0.0	0.0	0.0
MICALL2	79778	symbol	H. sapiens	79778	H. sapiens	0.0	0.0	0.0	0.0	0.0	0.0	0.0	0.0	0.0	0.0	0.0	0.0	0.0	0.0	0.0	0.0	0.0	1.0	1.0	0.0
INTS8	55656	symbol	H. sapiens	55656	H. sapiens	1.0	0.0	0.0	0.0	0.0	0.0	0.0	0.0	0.0	0.0	0.0	0.0	0.0	0.0	0.0	0.0	0.0	0.0	0.0	0.0
FAM219A	203259	symbol	H. sapiens	203259	H. sapiens	0.0	0.0	0.0	0.0	0.0	0.0	0.0	0.0	0.0	0.0	0.0	0.0	0.0	0.0	0.0	0.0	0.0	0.0	0.0	0.0
HGSNAT	138050	symbol	H. sapiens	138050	H. sapiens	0.0	0.0	0.0	0.0	0.0	0.0	0.0	0.0	0.0	0.0	0.0	0.0	0.0	0.0	0.0	0.0	0.0	0.0	0.0	0.0
CARD19	84270	symbol	H. sapiens	84270	H. sapiens	0.0	0.0	0.0	0.0	0.0	0.0	0.0	0.0	0.0	0.0	0.0	0.0	0.0	0.0	0.0	0.0	0.0	0.0	0.0	0.0
TRMT10B	158234	symbol	H. sapiens	158234	H. sapiens	1.0	1.0	0.0	0.0	0.0	0.0	0.0	0.0	0.0	0.0	0.0	0.0	0.0	0.0	1.0	1.0	0.0	0.0	0.0	0.0
INTS6L	203522	symbol	H. sapiens	203522	H. sapiens	1.0	0.0	0.0	0.0	0.0	0.0	0.0	0.0	0.0	0.0	0.0	0.0	0.0	0.0	0.0	0.0	0.0	0.0	0.0	0.0
MARC8						nan	nan	nan	nan	nan	nan	nan	nan	nan	nan	nan	nan	nan	nan	nan	nan	nan	nan	nan	nan
PCF11	51585	symbol	H. sapiens	51585	H. sapiens	0.0	0.0	0.0	0.0	0.0	0.0	0.0	0.0	1.0	0.0	0.0	0.0	0.0	0.0	0.0	0.0	0.0	0.0	0.0	0.0
KLHDC2	23588	symbol	H. sapiens	23588	H. sapiens	0.0	0.0	0.0	0.0	0.0	0.0	0.0	0.0	0.0	0.0	0.0	0.0	0.0	0.0	0.0	0.0	0.0	0.0	0.0	0.0
METTL17	64745	symbol	H. sapiens	64745	H. sapiens	0.0	1.0	0.0	0.0	0.0	0.0	0.0	0.0	0.0	0.0	0.0	0.0	0.0	0.0	0.0	0.0	0.0	0.0	0.0	0.0
NDRG2	57447	symbol	H. sapiens	57447	H. sapiens	0.0	0.0	0.0	0.0	0.0	0.0	0.0	1.0	0.0	0.0	0.0	0.0	0.0	0.0	0.0	0.0	0.0	0.0	0.0	0.0
CCDC186	55088	symbol	H. sapiens	55088	H. sapiens	0.0	0.0	0.0	0.0	0.0	0.0	0.0	0.0	0.0	0.0	0.0	0.0	0.0	0.0	0.0	0.0	0.0	0.0	0.0	0.0
SALL2	6297	symbol	H. sapiens	6297	H. sapiens	0.0	0.0	0.0	0.0	0.0	0.0	0.0	0.0	0.0	0.0	0.0	0.0	0.0	0.0	0.0	0.0	0.0	0.0	0.0	0.0
SMCO4	56935	symbol	H. sapiens	56935	H. sapiens	0.0	0.0	0.0	0.0	0.0	0.0	0.0	0.0	0.0	0.0	0.0	0.0	0.0	0.0	0.0	0.0	0.0	0.0	0.0	0.0
NDUFB8	4714	symbol	H. sapiens	4714	H. sapiens	0.0	0.0	0.0	1.0	0.0	0.0	0.0	0.0	0.0	0.0	0.0	0.0	0.0	0.0	0.0	0.0	0.0	0.0	1.0	0.0
BTRC	8945	symbol	H. sapiens	8945	H. sapiens	1.0	0.0	0.0	0.0	1.0	0.0	0.0	1.0	0.0	0.0	0.0	0.0	0.0	1.0	0.0	0.0	0.0	0.0	0.0	0.0
COPS2	9318	symbol	H. sapiens	9318	H. sapiens	0.0	0.0	0.0	0.0	0.0	0.0	0.0	1.0	0.0	0.0	0.0	0.0	0.0	0.0	0.0	0.0	0.0	0.0	0.0	0.0
PCBD1	5092	symbol	H. sapiens	5092	H. sapiens	0.0	0.0	0.0	1.0	0.0	0.0	0.0	0.0	0.0	0.0	0.0	0.0	1.0	0.0	0.0	0.0	0.0	0.0	0.0	0.0
PLEKHF1	79156	symbol	H. sapiens	79156	H. sapiens	0.0	0.0	0.0	0.0	0.0	1.0	0.0	0.0	0.0	0.0	0.0	0.0	0.0	0.0	0.0	0.0	1.0	0.0	0.0	0.0
CLEC3A	10143	symbol	H. sapiens	10143	H. sapiens	0.0	0.0	0.0	0.0	0.0	0.0	0.0	0.0	0.0	0.0	0.0	0.0	0.0	0.0	0.0	0.0	0.0	0.0	0.0	0.0
TMEM135	65084	symbol	H. sapiens	65084	H. sapiens	0.0	0.0	0.0	0.0	0.0	0.0	0.0	0.0	0.0	0.0	0.0	0.0	0.0	0.0	0.0	0.0	0.0	0.0	1.0	0.0
ATF7IP2	80063	symbol	H. sapiens	80063	H. sapiens	0.0	0.0	0.0	0.0	0.0	0.0	0.0	0.0	0.0	0.0	0.0	0.0	0.0	0.0	0.0	0.0	0.0	0.0	0.0	0.0
BEX3	27018	symbol	H. sapiens	27018	H. sapiens	0.0	0.0	0.0	0.0	0.0	0.0	1.0	0.0	0.0	0.0	0.0	0.0	0.0	0.0	0.0	0.0	0.0	0.0	0.0	0.0
NEMP1	23306	symbol	H. sapiens	23306	H. sapiens	0.0	0.0	0.0	0.0	0.0	0.0	0.0	0.0	0.0	0.0	0.0	0.0	0.0	0.0	0.0	0.0	0.0	0.0	0.0	0.0
PATL1	219988	symbol	H. sapiens	219988	H. sapiens	1.0	0.0	0.0	1.0	0.0	0.0	0.0	0.0	1.0	0.0	0.0	0.0	0.0	0.0	0.0	0.0	0.0	0.0	0.0	0.0
TSC22D4	81628	symbol	H. sapiens	81628	H. sapiens	0.0	0.0	0.0	0.0	0.0	0.0	0.0	0.0	0.0	0.0	0.0	0.0	0.0	0.0	0.0	0.0	0.0	0.0	0.0	0.0
RCCD1	91433	symbol	H. sapiens	91433	H. sapiens	0.0	0.0	0.0	0.0	0.0	0.0	0.0	0.0	0.0	0.0	0.0	0.0	0.0	0.0	0.0	0.0	0.0	0.0	0.0	0.0
MBD6	114785	symbol	H. sapiens	114785	H. sapiens	0.0	0.0	0.0	0.0	0.0	0.0	0.0	1.0	0.0	0.0	0.0	0.0	0.0	0.0	0.0	0.0	0.0	0.0	0.0	0.0
SLC27A4	10999	symbol	H. sapiens	10999	H. sapiens	0.0	0.0	0.0	1.0	0.0	0.0	0.0	0.0	0.0	0.0	0.0	0.0	0.0	0.0	0.0	0.0	0.0	0.0	0.0	0.0
ZNF91	7644	symbol	H. sapiens	7644	H. sapiens	0.0	0.0	0.0	0.0	0.0	0.0	0.0	0.0	0.0	0.0	0.0	0.0	0.0	0.0	0.0	0.0	0.0	0.0	0.0	0.0
MYO5B	4645	symbol	H. sapiens	4645	H. sapiens	0.0	0.0	0.0	0.0	0.0	0.0	0.0	0.0	0.0	0.0	0.0	0.0	0.0	0.0	0.0	0.0	0.0	0.0	0.0	0.0
RRM1	6240	symbol	H. sapiens	6240	H. sapiens	0.0	0.0	0.0	1.0	0.0	0.0	0.0	0.0	0.0	0.0	0.0	0.0	0.0	0.0	0.0	0.0	0.0	0.0	0.0	0.0
VKORC1	79001	symbol	H. sapiens	79001	H. sapiens	0.0	0.0	0.0	0.0	0.0	0.0	0.0	0.0	0.0	0.0	0.0	0.0	0.0	0.0	0.0	0.0	0.0	0.0	0.0	0.0
GPX4	2879	symbol	H. sapiens	2879	H. sapiens	0.0	0.0	0.0	1.0	0.0	0.0	0.0	0.0	0.0	1.0	0.0	0.0	1.0	0.0	0.0	0.0	0.0	0.0	0.0	0.0
PROCA1	147011	symbol	H. sapiens	147011	H. sapiens	0.0	0.0	0.0	0.0	0.0	0.0	0.0	0.0	0.0	1.0	0.0	0.0	0.0	0.0	0.0	0.0	0.0	0.0	0.0	0.0
TMC4	147798	symbol	H. sapiens	147798	H. sapiens	0.0	0.0	0.0	0.0	0.0	0.0	0.0	0.0	0.0	0.0	0.0	0.0	0.0	0.0	0.0	0.0	0.0	0.0	0.0	0.0
ZNF283	284349	symbol	H. sapiens	284349	H. sapiens	0.0	0.0	0.0	0.0	0.0	0.0	0.0	0.0	0.0	0.0	0.0	0.0	0.0	0.0	0.0	0.0	0.0	0.0	0.0	0.0
YIF1B	90522	symbol	H. sapiens	90522	H. sapiens	0.0	0.0	0.0	0.0	0.0	0.0	0.0	0.0	0.0	0.0	0.0	0.0	0.0	0.0	0.0	0.0	0.0	0.0	0.0	0.0
UBXN6	80700	symbol	H. sapiens	80700	H. sapiens	0.0	0.0	0.0	0.0	0.0	0.0	0.0	0.0	0.0	0.0	0.0	0.0	0.0	1.0	0.0	0.0	1.0	0.0	0.0	0.0
RILP	83547	symbol	H. sapiens	83547	H. sapiens	0.0	0.0	1.0	0.0	0.0	1.0	0.0	1.0	0.0	0.0	0.0	0.0	0.0	1.0	0.0	0.0	0.0	0.0	0.0	0.0
SERPINF2	5345	symbol	H. sapiens	5345	H. sapiens	0.0	0.0	0.0	0.0	0.0	0.0	0.0	0.0	0.0	0.0	0.0	1.0	0.0	0.0	0.0	0.0	0.0	1.0	0.0	0.0
TRPV3	162514	symbol	H. sapiens	162514	H. sapiens	0.0	0.0	0.0	0.0	0.0	0.0	0.0	0.0	0.0	0.0	0.0	0.0	0.0	0.0	0.0	0.0	0.0	0.0	0.0	0.0
CD320	51293	symbol	H. sapiens	51293	H. sapiens	0.0	0.0	0.0	1.0	0.0	0.0	0.0	1.0	0.0	0.0	0.0	0.0	0.0	0.0	0.0	0.0	0.0	0.0	0.0	0.0
VPS37C	55048	symbol	H. sapiens	55048	H. sapiens	0.0	0.0	0.0	0.0	0.0	1.0	0.0	0.0	0.0	0.0	0.0	0.0	0.0	1.0	0.0	0.0	1.0	0.0	1.0	0.0
C2CD3	26005	symbol	H. sapiens	26005	H. sapiens	0.0	0.0	1.0	0.0	0.0	1.0	0.0	0.0	0.0	0.0	1.0	1.0	0.0	0.0	0.0	0.0	0.0	0.0	0.0	0.0
COPS6	10980	symbol	H. sapiens	10980	H. sapiens	0.0	0.0	0.0	0.0	0.0	0.0	0.0	1.0	0.0	0.0	0.0	0.0	0.0	0.0	0.0	0.0	0.0	0.0	0.0	0.0
KIAA1586	57691	symbol	H. sapiens	57691	H. sapiens	0.0	1.0	0.0	0.0	0.0	0.0	0.0	0.0	0.0	0.0	0.0	0.0	0.0	0.0	0.0	0.0	0.0	0.0	0.0	0.0
PXK	54899	symbol	H. sapiens	54899	H. sapiens	0.0	0.0	0.0	0.0	0.0	0.0	0.0	0.0	0.0	0.0	0.0	0.0	0.0	0.0	0.0	0.0	0.0	0.0	0.0	0.0
PCMTD1	115294	symbol	H. sapiens	115294	H. sapiens	0.0	1.0	0.0	0.0	0.0	0.0	0.0	0.0	0.0	0.0	0.0	0.0	0.0	0.0	0.0	0.0	0.0	0.0	0.0	0.0
CDC40	51362	symbol	H. sapiens	51362	H. sapiens	0.0	0.0	0.0	0.0	0.0	0.0	0.0	0.0	1.0	0.0	0.0	0.0	0.0	0.0	0.0	0.0	0.0	0.0	0.0	0.0
HEXIM2	124790	symbol	H. sapiens	124790	H. sapiens	0.0	0.0	0.0	0.0	1.0	0.0	0.0	0.0	0.0	0.0	0.0	0.0	0.0	0.0	0.0	0.0	0.0	0.0	0.0	0.0
TMEM223	79064	symbol	H. sapiens	79064	H. sapiens	0.0	0.0	0.0	0.0	0.0	0.0	0.0	0.0	0.0	0.0	0.0	0.0	0.0	0.0	0.0	0.0	0.0	0.0	0.0	0.0
TMUB2	79089	symbol	H. sapiens	79089	H. sapiens	0.0	0.0	0.0	0.0	0.0	0.0	0.0	0.0	0.0	0.0	0.0	0.0	0.0	1.0	0.0	0.0	0.0	0.0	0.0	0.0
GDNF	2668	symbol	H. sapiens	2668	H. sapiens	0.0	0.0	0.0	1.0	0.0	0.0	0.0	1.0	0.0	0.0	0.0	0.0	0.0	0.0	0.0	0.0	0.0	0.0	0.0	0.0
LDLRAD4	753	symbol	H. sapiens	753	H. sapiens	0.0	0.0	0.0	0.0	0.0	0.0	0.0	0.0	0.0	0.0	0.0	0.0	0.0	0.0	0.0	0.0	0.0	0.0	0.0	0.0
AHCYL1	10768	symbol	H. sapiens	10768	H. sapiens	0.0	0.0	0.0	1.0	0.0	0.0	0.0	1.0	1.0	0.0	0.0	0.0	1.0	0.0	0.0	0.0	0.0	0.0	0.0	0.0
GSTM4	2948	symbol	H. sapiens	2948	H. sapiens	0.0	0.0	0.0	1.0	0.0	0.0	0.0	0.0	0.0	1.0	0.0	0.0	1.0	0.0	0.0	0.0	0.0	0.0	0.0	0.0
TSPAN5	10098	symbol	H. sapiens	10098	H. sapiens	0.0	0.0	0.0	0.0	0.0	0.0	0.0	0.0	0.0	0.0	0.0	0.0	0.0	0.0	0.0	0.0	0.0	0.0	0.0	0.0
LCMT2	9836	symbol	H. sapiens	9836	H. sapiens	1.0	1.0	0.0	1.0	0.0	0.0	0.0	0.0	0.0	0.0	0.0	0.0	0.0	0.0	0.0	1.0	0.0	0.0	0.0	0.0
ZNF507	22847	symbol	H. sapiens	22847	H. sapiens	0.0	0.0	0.0	0.0	0.0	0.0	0.0	0.0	0.0	0.0	0.0	0.0	0.0	0.0	0.0	0.0	0.0	0.0	0.0	0.0
DDX19A	55308	symbol	H. sapiens	55308	H. sapiens	0.0	0.0	0.0	0.0	0.0	0.0	0.0	0.0	0.0	0.0	0.0	0.0	0.0	0.0	0.0	0.0	0.0	0.0	0.0	0.0
CEP120	153241	symbol	H. sapiens	153241	H. sapiens	0.0	0.0	1.0	0.0	1.0	1.0	0.0	0.0	0.0	0.0	0.0	1.0	0.0	0.0	0.0	0.0	0.0	0.0	0.0	0.0
E2F6	1876	symbol	H. sapiens	1876	H. sapiens	0.0	0.0	0.0	0.0	1.0	0.0	0.0	0.0	0.0	0.0	0.0	0.0	0.0	0.0	0.0	0.0	0.0	0.0	0.0	0.0
UPF3A	65110	symbol	H. sapiens	65110	H. sapiens	0.0	0.0	0.0	1.0	0.0	0.0	0.0	0.0	0.0	0.0	0.0	0.0	0.0	0.0	0.0	0.0	0.0	0.0	0.0	0.0
AR	367	symbol	H. sapiens	367	H. sapiens	0.0	0.0	0.0	0.0	0.0	0.0	0.0	1.0	0.0	0.0	0.0	0.0	0.0	0.0	0.0	0.0	0.0	0.0	0.0	0.0
CSNK1G1	53944	symbol	H. sapiens	53944	H. sapiens	0.0	0.0	0.0	0.0	0.0	0.0	0.0	1.0	0.0	0.0	0.0	0.0	0.0	0.0	0.0	0.0	0.0	0.0	0.0	0.0
ZBTB43	23099	symbol	H. sapiens	23099	H. sapiens	0.0	0.0	0.0	0.0	0.0	0.0	0.0	0.0	0.0	0.0	0.0	0.0	0.0	0.0	0.0	0.0	0.0	0.0	0.0	0.0
RAB24	53917	symbol	H. sapiens	53917	H. sapiens	0.0	0.0	0.0	0.0	0.0	0.0	0.0	0.0	0.0	0.0	0.0	0.0	0.0	0.0	0.0	0.0	1.0	0.0	0.0	0.0
PGM2	55276	symbol	H. sapiens	55276	H. sapiens	0.0	0.0	0.0	1.0	0.0	0.0	0.0	0.0	0.0	0.0	0.0	0.0	0.0	0.0	0.0	0.0	0.0	0.0	0.0	0.0
CRADD	8738	symbol	H. sapiens	8738	H. sapiens	0.0	0.0	0.0	0.0	1.0	0.0	1.0	0.0	0.0	0.0	0.0	0.0	0.0	0.0	0.0	0.0	0.0	0.0	0.0	0.0
DFFB	1677	symbol	H. sapiens	1677	H. sapiens	0.0	0.0	0.0	1.0	0.0	0.0	0.0	0.0	0.0	0.0	0.0	0.0	0.0	0.0	0.0	0.0	0.0	0.0	0.0	0.0
HEXDC	284004	gene_synonym	H. sapiens	284004	H. sapiens	0.0	0.0	0.0	1.0	0.0	0.0	0.0	0.0	0.0	0.0	0.0	0.0	0.0	0.0	0.0	0.0	0.0	0.0	0.0	0.0
ASPSCR1	79058	symbol	H. sapiens	79058	H. sapiens	0.0	0.0	0.0	0.0	0.0	0.0	0.0	0.0	0.0	0.0	0.0	0.0	0.0	0.0	0.0	0.0	0.0	0.0	0.0	0.0
DUS1L	64118	symbol	H. sapiens	64118	H. sapiens	1.0	0.0	0.0	0.0	0.0	0.0	0.0	0.0	0.0	0.0	0.0	0.0	0.0	0.0	0.0	1.0	0.0	0.0	0.0	0.0
LIMS1	3987	symbol	H. sapiens	3987	H. sapiens	0.0	0.0	0.0	0.0	0.0	0.0	1.0	1.0	0.0	0.0	0.0	0.0	0.0	0.0	0.0	0.0	0.0	0.0	0.0	0.0
BTD	686	symbol	H. sapiens	686	H. sapiens	0.0	0.0	0.0	1.0	0.0	0.0	0.0	0.0	0.0	0.0	0.0	0.0	1.0	0.0	0.0	0.0	0.0	0.0	0.0	0.0
SYAP1	94056	symbol	H. sapiens	94056	H. sapiens	0.0	0.0	0.0	0.0	0.0	0.0	0.0	0.0	0.0	0.0	0.0	0.0	0.0	0.0	0.0	0.0	0.0	0.0	0.0	0.0
KLF13	51621	symbol	H. sapiens	51621	H. sapiens	0.0	0.0	0.0	0.0	0.0	0.0	0.0	0.0	0.0	0.0	0.0	0.0	0.0	0.0	0.0	0.0	0.0	0.0	0.0	0.0
ALCAM	214	symbol	H. sapiens	214	H. sapiens	0.0	0.0	0.0	0.0	0.0	0.0	0.0	0.0	0.0	0.0	0.0	0.0	0.0	0.0	0.0	0.0	0.0	0.0	0.0	0.0
CNTROB	116840	symbol	H. sapiens	116840	H. sapiens	0.0	0.0	1.0	0.0	0.0	0.0	0.0	0.0	0.0	0.0	0.0	1.0	0.0	0.0	0.0	0.0	0.0	0.0	0.0	0.0
UBE2E1	7324	symbol	H. sapiens	7324	H. sapiens	0.0	1.0	0.0	0.0	1.0	0.0	0.0	1.0	0.0	0.0	0.0	0.0	0.0	1.0	0.0	0.0	0.0	0.0	0.0	0.0
CHRNB1	1140	symbol	H. sapiens	1140	H. sapiens	0.0	0.0	0.0	0.0	0.0	0.0	0.0	1.0	0.0	0.0	0.0	0.0	0.0	0.0	0.0	0.0	0.0	0.0	0.0	0.0
PWWP2A	114825	symbol	H. sapiens	114825	H. sapiens	0.0	0.0	0.0	0.0	0.0	0.0	0.0	0.0	0.0	0.0	0.0	0.0	0.0	0.0	0.0	0.0	0.0	0.0	0.0	0.0
CMTM8	152189	symbol	H. sapiens	152189	H. sapiens	0.0	0.0	0.0	0.0	0.0	0.0	0.0	0.0	0.0	0.0	0.0	0.0	0.0	0.0	0.0	0.0	0.0	0.0	0.0	0.0
B3GNT2	10678	symbol	H. sapiens	10678	H. sapiens	0.0	0.0	0.0	1.0	0.0	0.0	0.0	0.0	0.0	0.0	0.0	0.0	1.0	0.0	0.0	0.0	0.0	0.0	0.0	0.0
SETMAR	6419	symbol	H. sapiens	6419	H. sapiens	0.0	1.0	0.0	1.0	1.0	0.0	1.0	0.0	0.0	0.0	0.0	0.0	0.0	0.0	0.0	0.0	0.0	0.0	0.0	0.0
GPRC5C	55890	symbol	H. sapiens	55890	H. sapiens	0.0	0.0	0.0	0.0	0.0	0.0	0.0	0.0	0.0	0.0	0.0	0.0	0.0	0.0	0.0	0.0	0.0	0.0	0.0	0.0
TMEM182	130827	symbol	H. sapiens	130827	H. sapiens	0.0	0.0	0.0	0.0	0.0	0.0	0.0	0.0	0.0	0.0	0.0	0.0	0.0	0.0	0.0	0.0	0.0	0.0	0.0	0.0
PFKFB3	5209	symbol	H. sapiens	5209	H. sapiens	0.0	0.0	0.0	1.0	0.0	0.0	0.0	1.0	0.0	0.0	0.0	0.0	0.0	0.0	0.0	0.0	0.0	0.0	0.0	0.0
TMC7	79905	symbol	H. sapiens	79905	H. sapiens	0.0	0.0	0.0	0.0	0.0	0.0	0.0	0.0	0.0	0.0	0.0	0.0	0.0	0.0	0.0	0.0	0.0	0.0	0.0	0.0
ATF7	11016	symbol	H. sapiens	11016	H. sapiens	0.0	0.0	0.0	0.0	0.0	0.0	0.0	0.0	0.0	0.0	0.0	0.0	0.0	0.0	0.0	0.0	0.0	0.0	0.0	0.0
USP32	84669	symbol	H. sapiens	84669	H. sapiens	0.0	0.0	0.0	0.0	0.0	0.0	0.0	1.0	0.0	0.0	0.0	0.0	0.0	1.0	0.0	0.0	0.0	0.0	0.0	0.0
RIOX2	84864	symbol	H. sapiens	84864	H. sapiens	1.0	0.0	0.0	0.0	0.0	0.0	0.0	0.0	0.0	0.0	0.0	0.0	0.0	0.0	0.0	0.0	0.0	0.0	0.0	0.0
MTSS1	9788	symbol	H. sapiens	9788	H. sapiens	0.0	0.0	1.0	0.0	0.0	0.0	0.0	0.0	0.0	0.0	0.0	0.0	0.0	0.0	0.0	0.0	0.0	1.0	0.0	0.0
RPS9	6203	symbol	H. sapiens	6203	H. sapiens	1.0	0.0	0.0	1.0	0.0	0.0	0.0	0.0	0.0	0.0	0.0	0.0	0.0	0.0	0.0	0.0	0.0	0.0	1.0	0.0
PKIA	5569	symbol	H. sapiens	5569	H. sapiens	0.0	0.0	0.0	0.0	1.0	0.0	0.0	0.0	0.0	0.0	0.0	0.0	0.0	0.0	0.0	0.0	0.0	0.0	1.0	0.0
XKR6	286046	symbol	H. sapiens	286046	H. sapiens	0.0	0.0	0.0	0.0	0.0	0.0	0.0	0.0	0.0	0.0	0.0	0.0	0.0	0.0	0.0	0.0	0.0	0.0	0.0	0.0
ZNF692	55657	symbol	H. sapiens	55657	H. sapiens	0.0	0.0	0.0	0.0	0.0	0.0	0.0	0.0	0.0	0.0	0.0	0.0	0.0	0.0	0.0	0.0	0.0	0.0	0.0	0.0
RBKS	64080	symbol	H. sapiens	64080	H. sapiens	0.0	0.0	0.0	1.0	0.0	0.0	0.0	0.0	0.0	0.0	0.0	0.0	0.0	0.0	0.0	0.0	0.0	0.0	0.0	0.0
CANT1	124583	symbol	H. sapiens	124583	H. sapiens	0.0	0.0	0.0	1.0	0.0	0.0	0.0	0.0	0.0	0.0	0.0	0.0	0.0	0.0	0.0	0.0	0.0	0.0	0.0	0.0
CHD7	55636	symbol	H. sapiens	55636	H. sapiens	1.0	0.0	0.0	0.0	0.0	0.0	0.0	0.0	0.0	0.0	0.0	0.0	0.0	0.0	0.0	0.0	0.0	0.0	0.0	0.0
ZBTB26	57684	symbol	H. sapiens	57684	H. sapiens	0.0	0.0	0.0	0.0	0.0	0.0	0.0	0.0	0.0	0.0	0.0	0.0	0.0	0.0	0.0	0.0	0.0	0.0	0.0	0.0
ZNF562	54811	symbol	H. sapiens	54811	H. sapiens	0.0	0.0	0.0	0.0	0.0	0.0	0.0	0.0	0.0	0.0	0.0	0.0	0.0	0.0	0.0	0.0	0.0	0.0	0.0	0.0
WIPF2	147179	symbol	H. sapiens	147179	H. sapiens	0.0	0.0	0.0	0.0	0.0	0.0	0.0	1.0	0.0	0.0	0.0	0.0	0.0	0.0	0.0	0.0	0.0	1.0	0.0	0.0
ZNF584	201514	symbol	H. sapiens	201514	H. sapiens	0.0	0.0	0.0	0.0	0.0	0.0	0.0	0.0	0.0	0.0	0.0	0.0	0.0	0.0	0.0	0.0	0.0	0.0	0.0	0.0
ZNF274	10782	symbol	H. sapiens	10782	H. sapiens	0.0	1.0	0.0	0.0	0.0	0.0	0.0	0.0	0.0	0.0	0.0	0.0	0.0	0.0	0.0	0.0	0.0	0.0	0.0	0.0
BPTF	2186	symbol	H. sapiens	2186	H. sapiens	0.0	0.0	0.0	0.0	0.0	0.0	0.0	0.0	0.0	0.0	0.0	0.0	0.0	0.0	0.0	0.0	0.0	0.0	0.0	0.0
RGS19	10287	symbol	H. sapiens	10287	H. sapiens	0.0	0.0	0.0	0.0	0.0	0.0	0.0	0.0	0.0	0.0	0.0	0.0	0.0	0.0	0.0	0.0	1.0	0.0	0.0	0.0
TMEM51	55092	symbol	H. sapiens	55092	H. sapiens	0.0	0.0	0.0	0.0	0.0	0.0	0.0	0.0	0.0	0.0	0.0	0.0	0.0	0.0	0.0	0.0	0.0	0.0	0.0	0.0
CAMTA1	23261	symbol	H. sapiens	23261	H. sapiens	0.0	0.0	0.0	0.0	0.0	0.0	0.0	0.0	0.0	0.0	0.0	0.0	0.0	0.0	0.0	0.0	0.0	0.0	0.0	0.0
BCL2	596	symbol	H. sapiens	596	H. sapiens	0.0	0.0	0.0	1.0	1.0	1.0	0.0	1.0	0.0	0.0	0.0	0.0	0.0	1.0	0.0	0.0	1.0	1.0	1.0	0.0
MLLT3	4300	symbol	H. sapiens	4300	H. sapiens	0.0	0.0	0.0	0.0	0.0	0.0	0.0	1.0	0.0	0.0	0.0	0.0	0.0	0.0	0.0	0.0	0.0	0.0	0.0	0.0
MRM3	55178	symbol	H. sapiens	55178	H. sapiens	1.0	1.0	0.0	0.0	0.0	0.0	0.0	0.0	0.0	0.0	0.0	0.0	0.0	0.0	0.0	1.0	0.0	0.0	0.0	0.0
ATPAF2	91647	symbol	H. sapiens	91647	H. sapiens	0.0	0.0	0.0	0.0	0.0	0.0	0.0	0.0	0.0	0.0	0.0	0.0	0.0	0.0	0.0	0.0	0.0	0.0	0.0	0.0
USP19	10869	symbol	H. sapiens	10869	H. sapiens	0.0	0.0	0.0	0.0	1.0	0.0	0.0	1.0	0.0	0.0	0.0	0.0	0.0	1.0	0.0	0.0	0.0	0.0	0.0	0.0
ORMDL3	94103	symbol	H. sapiens	94103	H. sapiens	0.0	0.0	0.0	0.0	0.0	0.0	0.0	0.0	0.0	1.0	0.0	0.0	0.0	0.0	0.0	0.0	0.0	0.0	0.0	0.0
SMN1	6606	symbol	H. sapiens	6606	H. sapiens	1.0	0.0	0.0	0.0	0.0	0.0	0.0	0.0	1.0	0.0	0.0	0.0	0.0	0.0	0.0	0.0	0.0	0.0	0.0	0.0
TEFM	79736	symbol	H. sapiens	79736	H. sapiens	0.0	0.0	0.0	1.0	0.0	0.0	0.0	0.0	0.0	0.0	0.0	0.0	0.0	0.0	1.0	0.0	0.0	0.0	1.0	0.0
BSG	682	symbol	H. sapiens	682	H. sapiens	0.0	0.0	0.0	1.0	0.0	0.0	0.0	0.0	0.0	0.0	0.0	0.0	0.0	0.0	0.0	0.0	0.0	0.0	0.0	0.0
MCRIP2	84331	symbol	H. sapiens	84331	H. sapiens	0.0	0.0	0.0	0.0	0.0	0.0	0.0	0.0	0.0	0.0	0.0	0.0	0.0	0.0	0.0	0.0	0.0	0.0	0.0	0.0
CLP1	10978	symbol	H. sapiens	10978	H. sapiens	1.0	0.0	0.0	0.0	0.0	0.0	0.0	0.0	1.0	0.0	0.0	0.0	0.0	0.0	0.0	1.0	0.0	0.0	0.0	0.0
MRPL52	122704	symbol	H. sapiens	122704	H. sapiens	0.0	0.0	0.0	0.0	0.0	0.0	0.0	0.0	0.0	0.0	0.0	0.0	0.0	0.0	0.0	0.0	0.0	0.0	0.0	0.0
RND1	27289	symbol	H. sapiens	27289	H. sapiens	0.0	0.0	0.0	0.0	0.0	0.0	0.0	0.0	0.0	0.0	0.0	1.0	0.0	0.0	0.0	0.0	0.0	1.0	0.0	0.0
WASHC2C	253725	symbol	H. sapiens	253725	H. sapiens	0.0	0.0	0.0	0.0	0.0	0.0	0.0	0.0	0.0	0.0	0.0	1.0	0.0	0.0	0.0	0.0	0.0	1.0	0.0	0.0
TMEM134	80194	symbol	H. sapiens	80194	H. sapiens	0.0	0.0	0.0	0.0	0.0	0.0	0.0	0.0	0.0	0.0	0.0	0.0	0.0	0.0	0.0	0.0	0.0	0.0	0.0	0.0
CORO1B	57175	symbol	H. sapiens	57175	H. sapiens	0.0	0.0	0.0	0.0	0.0	0.0	0.0	0.0	0.0	0.0	0.0	1.0	0.0	0.0	0.0	0.0	0.0	1.0	0.0	0.0
FUT10	84750	symbol	H. sapiens	84750	H. sapiens	0.0	0.0	0.0	1.0	0.0	0.0	0.0	0.0	0.0	0.0	0.0	0.0	0.0	0.0	0.0	0.0	0.0	0.0	1.0	0.0
NAA16	79612	symbol	H. sapiens	79612	H. sapiens	0.0	0.0	0.0	0.0	0.0	0.0	0.0	0.0	0.0	0.0	0.0	0.0	0.0	0.0	0.0	0.0	0.0	0.0	0.0	0.0
CBWD1	55871	symbol	H. sapiens	55871	H. sapiens	0.0	0.0	0.0	0.0	0.0	0.0	0.0	0.0	0.0	0.0	0.0	0.0	0.0	0.0	0.0	0.0	0.0	0.0	0.0	0.0
ZNF621	285268	symbol	H. sapiens	285268	H. sapiens	0.0	0.0	0.0	0.0	0.0	0.0	0.0	0.0	0.0	0.0	0.0	0.0	0.0	0.0	0.0	0.0	0.0	0.0	0.0	0.0
RNASEH2C	84153	symbol	H. sapiens	84153	H. sapiens	0.0	0.0	0.0	1.0	0.0	0.0	0.0	0.0	0.0	0.0	0.0	0.0	0.0	0.0	0.0	0.0	0.0	0.0	0.0	0.0
MYD88	4615	symbol	H. sapiens	4615	H. sapiens	0.0	0.0	0.0	1.0	0.0	0.0	0.0	1.0	0.0	0.0	0.0	0.0	0.0	0.0	0.0	0.0	0.0	0.0	0.0	0.0
PHF8	23133	symbol	H. sapiens	23133	H. sapiens	0.0	1.0	0.0	0.0	1.0	0.0	0.0	0.0	0.0	0.0	0.0	0.0	0.0	0.0	0.0	0.0	0.0	0.0	0.0	0.0
MIR4435-2HG	541471	symbol	H. sapiens	541471	H. sapiens	0.0	0.0	0.0	0.0	0.0	0.0	0.0	0.0	0.0	0.0	0.0	0.0	0.0	0.0	0.0	0.0	0.0	0.0	0.0	0.0
FAM222B	55731	symbol	H. sapiens	55731	H. sapiens	0.0	0.0	0.0	0.0	0.0	0.0	0.0	0.0	0.0	0.0	0.0	0.0	0.0	0.0	0.0	0.0	0.0	0.0	0.0	0.0
HPSE	10855	symbol	H. sapiens	10855	H. sapiens	0.0	0.0	0.0	0.0	0.0	0.0	0.0	0.0	0.0	0.0	0.0	0.0	0.0	0.0	0.0	0.0	0.0	0.0	0.0	0.0
ADCY5	111	symbol	H. sapiens	111	H. sapiens	0.0	0.0	0.0	1.0	0.0	0.0	0.0	0.0	0.0	0.0	0.0	0.0	0.0	0.0	0.0	0.0	0.0	0.0	0.0	0.0
SLC2A14	144195	symbol	H. sapiens	144195	H. sapiens	0.0	0.0	0.0	0.0	0.0	0.0	0.0	0.0	0.0	0.0	0.0	0.0	0.0	0.0	0.0	0.0	0.0	0.0	0.0	0.0
MAP3K11	4296	symbol	H. sapiens	4296	H. sapiens	0.0	0.0	0.0	0.0	0.0	0.0	0.0	0.0	0.0	0.0	0.0	1.0	0.0	0.0	0.0	0.0	0.0	0.0	0.0	0.0
TRIB1	10221	symbol	H. sapiens	10221	H. sapiens	0.0	0.0	0.0	0.0	0.0	0.0	0.0	0.0	0.0	0.0	0.0	0.0	0.0	1.0	0.0	0.0	0.0	0.0	0.0	0.0
SSSCA1	10534	gene_synonym	H. sapiens	10534	H. sapiens	0.0	0.0	0.0	0.0	0.0	0.0	0.0	0.0	0.0	0.0	0.0	0.0	0.0	0.0	0.0	0.0	0.0	0.0	0.0	0.0
GMPPB	29925	symbol	H. sapiens	29925	H. sapiens	0.0	0.0	0.0	1.0	0.0	0.0	0.0	0.0	0.0	0.0	0.0	0.0	0.0	0.0	0.0	0.0	0.0	0.0	0.0	0.0
CEP83	51134	symbol	H. sapiens	51134	H. sapiens	0.0	0.0	1.0	0.0	0.0	1.0	0.0	0.0	0.0	0.0	1.0	0.0	0.0	0.0	0.0	0.0	0.0	0.0	0.0	0.0
SLC19A1	6573	symbol	H. sapiens	6573	H. sapiens	0.0	0.0	0.0	1.0	0.0	0.0	0.0	0.0	0.0	0.0	0.0	0.0	1.0	0.0	0.0	0.0	0.0	0.0	0.0	0.0
CBX2	84733	symbol	H. sapiens	84733	H. sapiens	0.0	0.0	0.0	0.0	0.0	0.0	0.0	0.0	0.0	0.0	0.0	0.0	0.0	0.0	0.0	0.0	0.0	0.0	0.0	0.0
MGA	23269	symbol	H. sapiens	23269	H. sapiens	0.0	0.0	0.0	0.0	1.0	0.0	0.0	0.0	0.0	0.0	0.0	0.0	0.0	0.0	0.0	0.0	0.0	0.0	0.0	0.0
PIGG	54872	symbol	H. sapiens	54872	H. sapiens	0.0	0.0	0.0	1.0	0.0	0.0	0.0	0.0	0.0	1.0	0.0	0.0	0.0	0.0	0.0	0.0	0.0	0.0	0.0	0.0
IQCK	124152	symbol	H. sapiens	124152	H. sapiens	0.0	0.0	0.0	0.0	0.0	0.0	0.0	0.0	0.0	0.0	0.0	0.0	0.0	0.0	0.0	0.0	0.0	0.0	0.0	0.0
LARP7	51574	symbol	H. sapiens	51574	H. sapiens	0.0	0.0	0.0	0.0	0.0	0.0	0.0	0.0	0.0	0.0	0.0	0.0	0.0	0.0	0.0	0.0	0.0	0.0	0.0	0.0
RIN1	9610	symbol	H. sapiens	9610	H. sapiens	0.0	0.0	0.0	0.0	0.0	0.0	1.0	0.0	0.0	0.0	0.0	0.0	0.0	0.0	0.0	0.0	0.0	0.0	0.0	0.0
PSMD2	5708	symbol	H. sapiens	5708	H. sapiens	0.0	0.0	0.0	1.0	1.0	0.0	0.0	1.0	0.0	0.0	0.0	0.0	1.0	1.0	0.0	0.0	0.0	0.0	0.0	0.0
MED16	10025	symbol	H. sapiens	10025	H. sapiens	0.0	0.0	0.0	0.0	0.0	0.0	0.0	0.0	0.0	0.0	0.0	0.0	0.0	0.0	0.0	0.0	0.0	0.0	0.0	0.0
ATG13	9776	symbol	H. sapiens	9776	H. sapiens	0.0	0.0	0.0	0.0	0.0	0.0	0.0	0.0	0.0	0.0	0.0	0.0	0.0	0.0	0.0	0.0	1.0	0.0	1.0	1.0
TP53I11	9537	symbol	H. sapiens	9537	H. sapiens	0.0	0.0	0.0	0.0	0.0	0.0	0.0	0.0	0.0	0.0	0.0	0.0	0.0	0.0	0.0	0.0	0.0	0.0	0.0	0.0
EIF1AD	84285	symbol	H. sapiens	84285	H. sapiens	0.0	0.0	0.0	0.0	0.0	0.0	0.0	0.0	0.0	0.0	0.0	0.0	0.0	0.0	0.0	0.0	0.0	0.0	0.0	0.0
EIF3F	8665	symbol	H. sapiens	8665	H. sapiens	1.0	0.0	0.0	0.0	0.0	0.0	0.0	1.0	1.0	0.0	0.0	0.0	0.0	0.0	0.0	0.0	0.0	0.0	0.0	0.0
CCDC14	64770	symbol	H. sapiens	64770	H. sapiens	0.0	0.0	0.0	0.0	0.0	0.0	0.0	0.0	0.0	0.0	1.0	0.0	0.0	0.0	0.0	0.0	0.0	0.0	0.0	0.0
SART1	9092	symbol	H. sapiens	9092	H. sapiens	1.0	0.0	0.0	0.0	0.0	0.0	0.0	0.0	1.0	0.0	0.0	0.0	0.0	0.0	0.0	0.0	0.0	0.0	0.0	0.0
PPP2R2D	55844	symbol	H. sapiens	55844	H. sapiens	0.0	0.0	0.0	0.0	1.0	0.0	0.0	0.0	0.0	0.0	0.0	0.0	0.0	0.0	0.0	0.0	0.0	0.0	0.0	0.0
POLD4	57804	symbol	H. sapiens	57804	H. sapiens	0.0	0.0	0.0	0.0	0.0	0.0	0.0	0.0	0.0	0.0	0.0	0.0	0.0	0.0	0.0	0.0	0.0	0.0	0.0	0.0
DRAP1	10589	symbol	H. sapiens	10589	H. sapiens	0.0	0.0	0.0	0.0	0.0	0.0	0.0	0.0	0.0	0.0	0.0	0.0	0.0	0.0	0.0	0.0	0.0	0.0	0.0	0.0
MRPL48	51642	symbol	H. sapiens	51642	H. sapiens	0.0	0.0	0.0	0.0	0.0	0.0	0.0	0.0	0.0	0.0	0.0	0.0	0.0	0.0	0.0	0.0	0.0	0.0	0.0	0.0
P2RY2	5029	symbol	H. sapiens	5029	H. sapiens	0.0	0.0	0.0	0.0	0.0	0.0	0.0	0.0	0.0	0.0	0.0	0.0	0.0	0.0	0.0	0.0	0.0	0.0	0.0	0.0
TOM1L2	146691	symbol	H. sapiens	146691	H. sapiens	0.0	0.0	0.0	0.0	1.0	0.0	0.0	0.0	0.0	0.0	0.0	0.0	0.0	0.0	0.0	0.0	0.0	0.0	0.0	0.0
TOMM5	401505	symbol	H. sapiens	401505	H. sapiens	0.0	0.0	0.0	0.0	0.0	0.0	0.0	0.0	0.0	0.0	0.0	0.0	0.0	0.0	0.0	0.0	1.0	0.0	1.0	0.0
BAIAP2	10458	symbol	H. sapiens	10458	H. sapiens	0.0	0.0	0.0	0.0	0.0	0.0	0.0	1.0	0.0	0.0	0.0	1.0	0.0	0.0	0.0	0.0	0.0	1.0	0.0	0.0
TUBB6	84617	symbol	H. sapiens	84617	H. sapiens	0.0	0.0	0.0	0.0	0.0	0.0	0.0	0.0	0.0	0.0	0.0	1.0	0.0	0.0	0.0	0.0	0.0	0.0	0.0	0.0
SSNA1	8636	symbol	H. sapiens	8636	H. sapiens	0.0	0.0	1.0	0.0	1.0	1.0	0.0	0.0	0.0	0.0	0.0	1.0	0.0	0.0	0.0	0.0	0.0	0.0	0.0	0.0
ZSCAN2	54993	symbol	H. sapiens	54993	H. sapiens	0.0	0.0	0.0	0.0	0.0	0.0	0.0	0.0	0.0	0.0	0.0	0.0	0.0	0.0	0.0	0.0	0.0	0.0	0.0	0.0
VSIG10	54621	symbol	H. sapiens	54621	H. sapiens	0.0	0.0	0.0	0.0	0.0	0.0	0.0	0.0	0.0	0.0	0.0	0.0	0.0	0.0	0.0	0.0	0.0	0.0	0.0	0.0
IRX5	10265	symbol	H. sapiens	10265	H. sapiens	0.0	0.0	0.0	0.0	0.0	0.0	0.0	0.0	0.0	0.0	0.0	0.0	0.0	0.0	0.0	0.0	0.0	0.0	0.0	0.0
SHMT1	6470	symbol	H. sapiens	6470	H. sapiens	0.0	0.0	0.0	1.0	0.0	0.0	0.0	0.0	0.0	0.0	0.0	0.0	1.0	0.0	0.0	0.0	0.0	0.0	0.0	0.0
SIX5	147912	symbol	H. sapiens	147912	H. sapiens	0.0	0.0	0.0	0.0	0.0	0.0	0.0	0.0	0.0	0.0	0.0	0.0	0.0	0.0	0.0	0.0	0.0	0.0	0.0	0.0
WDR73	84942	symbol	H. sapiens	84942	H. sapiens	0.0	0.0	0.0	0.0	0.0	0.0	0.0	0.0	0.0	0.0	0.0	1.0	0.0	0.0	0.0	0.0	0.0	0.0	0.0	0.0
ANO6	196527	symbol	H. sapiens	196527	H. sapiens	0.0	0.0	1.0	0.0	0.0	0.0	0.0	0.0	0.0	0.0	0.0	0.0	0.0	0.0	0.0	0.0	0.0	0.0	0.0	0.0
TALDO1	6888	symbol	H. sapiens	6888	H. sapiens	0.0	0.0	0.0	1.0	0.0	0.0	0.0	1.0	0.0	0.0	0.0	0.0	0.0	0.0	0.0	0.0	0.0	0.0	0.0	0.0
TOP3A	7156	symbol	H. sapiens	7156	H. sapiens	0.0	0.0	0.0	0.0	0.0	0.0	0.0	0.0	0.0	0.0	0.0	0.0	0.0	0.0	0.0	0.0	0.0	0.0	1.0	0.0
NR2C2	7182	symbol	H. sapiens	7182	H. sapiens	0.0	0.0	0.0	0.0	0.0	0.0	0.0	0.0	0.0	0.0	0.0	0.0	0.0	0.0	0.0	0.0	0.0	0.0	0.0	0.0
ACAD9	28976	symbol	H. sapiens	28976	H. sapiens	0.0	0.0	0.0	1.0	0.0	0.0	0.0	0.0	0.0	0.0	0.0	0.0	0.0	0.0	0.0	0.0	0.0	0.0	1.0	0.0
AGTRAP	57085	symbol	H. sapiens	57085	H. sapiens	0.0	0.0	0.0	0.0	0.0	0.0	0.0	0.0	0.0	0.0	0.0	0.0	0.0	0.0	0.0	0.0	0.0	0.0	0.0	0.0
NECTIN3	25945	symbol	H. sapiens	25945	H. sapiens	0.0	0.0	0.0	0.0	0.0	0.0	0.0	0.0	0.0	0.0	0.0	0.0	0.0	0.0	0.0	0.0	0.0	0.0	0.0	0.0
ALS2CL	259173	symbol	H. sapiens	259173	H. sapiens	0.0	0.0	0.0	0.0	0.0	1.0	1.0	0.0	0.0	0.0	0.0	0.0	0.0	0.0	0.0	0.0	0.0	0.0	0.0	0.0
MLF1	4291	symbol	H. sapiens	4291	H. sapiens	0.0	0.0	0.0	0.0	1.0	0.0	0.0	1.0	0.0	0.0	0.0	0.0	0.0	0.0	0.0	0.0	0.0	0.0	0.0	0.0
STAP2	55620	symbol	H. sapiens	55620	H. sapiens	0.0	0.0	0.0	0.0	0.0	0.0	0.0	0.0	0.0	0.0	0.0	0.0	0.0	0.0	0.0	0.0	0.0	0.0	0.0	0.0
BOLA1	51027	symbol	H. sapiens	51027	H. sapiens	0.0	0.0	0.0	0.0	0.0	0.0	0.0	0.0	0.0	0.0	0.0	0.0	0.0	0.0	0.0	0.0	0.0	0.0	0.0	0.0
LCORL	254251	symbol	H. sapiens	254251	H. sapiens	0.0	0.0	0.0	0.0	0.0	0.0	0.0	0.0	0.0	0.0	0.0	0.0	0.0	0.0	0.0	0.0	0.0	0.0	0.0	0.0
KDELC2	143888	gene_synonym	H. sapiens	143888	H. sapiens	0.0	0.0	0.0	1.0	0.0	0.0	0.0	0.0	0.0	0.0	0.0	0.0	0.0	0.0	0.0	0.0	0.0	0.0	0.0	0.0
TMEM11	8834	symbol	H. sapiens	8834	H. sapiens	0.0	0.0	0.0	0.0	0.0	0.0	0.0	0.0	0.0	0.0	0.0	0.0	0.0	0.0	0.0	0.0	0.0	0.0	1.0	0.0
EXOSC4	54512	symbol	H. sapiens	54512	H. sapiens	1.0	0.0	0.0	1.0	0.0	0.0	0.0	1.0	0.0	0.0	0.0	0.0	0.0	0.0	0.0	0.0	0.0	0.0	0.0	0.0
C17orf62	79415	gene_synonym	H. sapiens	79415	H. sapiens	0.0	0.0	0.0	0.0	0.0	0.0	0.0	0.0	0.0	0.0	0.0	0.0	0.0	0.0	0.0	0.0	0.0	0.0	0.0	0.0
FARSA	2193	symbol	H. sapiens	2193	H. sapiens	1.0	0.0	0.0	0.0	0.0	0.0	0.0	0.0	0.0	0.0	0.0	0.0	1.0	0.0	0.0	1.0	0.0	0.0	0.0	0.0
TCAIM	285343	symbol	H. sapiens	285343	H. sapiens	0.0	0.0	0.0	0.0	0.0	0.0	0.0	0.0	0.0	0.0	0.0	0.0	0.0	0.0	0.0	0.0	0.0	0.0	0.0	0.0
ZNF664	144348	symbol	H. sapiens	144348	H. sapiens	0.0	0.0	0.0	0.0	0.0	0.0	0.0	0.0	0.0	0.0	0.0	0.0	0.0	0.0	0.0	0.0	0.0	0.0	0.0	0.0
CLK3	1198	symbol	H. sapiens	1198	H. sapiens	0.0	0.0	0.0	0.0	0.0	0.0	0.0	0.0	1.0	0.0	0.0	0.0	0.0	0.0	0.0	0.0	0.0	0.0	0.0	0.0
PACS2	23241	symbol	H. sapiens	23241	H. sapiens	0.0	0.0	0.0	0.0	0.0	0.0	0.0	0.0	0.0	0.0	0.0	0.0	0.0	0.0	0.0	0.0	1.0	0.0	0.0	1.0
ELMOD2	255520	symbol	H. sapiens	255520	H. sapiens	0.0	0.0	0.0	0.0	0.0	0.0	1.0	0.0	0.0	0.0	0.0	0.0	0.0	0.0	0.0	0.0	0.0	0.0	0.0	0.0
GEMIN4	50628	symbol	H. sapiens	50628	H. sapiens	1.0	0.0	0.0	0.0	0.0	0.0	0.0	0.0	1.0	0.0	0.0	0.0	0.0	0.0	0.0	0.0	0.0	0.0	0.0	0.0
CIITA	4261	symbol	H. sapiens	4261	H. sapiens	0.0	0.0	0.0	0.0	0.0	0.0	0.0	1.0	0.0	0.0	0.0	0.0	0.0	0.0	0.0	0.0	0.0	0.0	0.0	0.0
APOBEC3B	9582	symbol	H. sapiens	9582	H. sapiens	0.0	0.0	0.0	1.0	0.0	0.0	0.0	0.0	0.0	0.0	0.0	0.0	0.0	0.0	0.0	1.0	0.0	0.0	0.0	0.0
MYADM	91663	symbol	H. sapiens	91663	H. sapiens	0.0	0.0	0.0	0.0	0.0	0.0	0.0	0.0	0.0	0.0	0.0	1.0	0.0	0.0	0.0	0.0	0.0	1.0	0.0	0.0
TMEM86B	255043	symbol	H. sapiens	255043	H. sapiens	0.0	0.0	0.0	0.0	0.0	0.0	0.0	0.0	0.0	1.0	0.0	0.0	0.0	0.0	0.0	0.0	0.0	0.0	0.0	0.0
PRKRA	8575	symbol	H. sapiens	8575	H. sapiens	1.0	0.0	0.0	0.0	0.0	0.0	0.0	0.0	0.0	0.0	0.0	0.0	0.0	0.0	0.0	0.0	0.0	0.0	0.0	0.0
MAP6D1	79929	symbol	H. sapiens	79929	H. sapiens	0.0	0.0	0.0	0.0	0.0	0.0	0.0	0.0	0.0	1.0	0.0	1.0	0.0	0.0	0.0	0.0	0.0	0.0	0.0	0.0
RPH3AL	9501	symbol	H. sapiens	9501	H. sapiens	0.0	0.0	0.0	0.0	0.0	0.0	0.0	0.0	0.0	0.0	0.0	0.0	0.0	0.0	0.0	0.0	0.0	0.0	0.0	0.0
SLC26A11	284129	symbol	H. sapiens	284129	H. sapiens	0.0	0.0	0.0	0.0	0.0	0.0	0.0	0.0	0.0	0.0	0.0	0.0	0.0	0.0	0.0	0.0	0.0	0.0	0.0	0.0
OGFOD3	79701	symbol	H. sapiens	79701	H. sapiens	0.0	0.0	0.0	0.0	0.0	0.0	0.0	0.0	0.0	0.0	0.0	0.0	0.0	0.0	0.0	0.0	0.0	0.0	0.0	0.0
HKR1	284459	gene_synonym	H. sapiens	284459	H. sapiens	0.0	0.0	0.0	0.0	0.0	0.0	0.0	0.0	0.0	0.0	0.0	0.0	0.0	0.0	0.0	0.0	0.0	0.0	0.0	0.0
MRPS11	64963	symbol	H. sapiens	64963	H. sapiens	1.0	0.0	0.0	0.0	0.0	0.0	0.0	0.0	1.0	0.0	0.0	0.0	0.0	0.0	0.0	0.0	0.0	0.0	0.0	0.0
SNRPE	6635	symbol	H. sapiens	6635	H. sapiens	1.0	0.0	0.0	0.0	0.0	0.0	0.0	0.0	1.0	0.0	0.0	0.0	0.0	0.0	0.0	0.0	0.0	0.0	0.0	0.0
WRB	7485	gene_synonym	H. sapiens	7485	H. sapiens	0.0	0.0	0.0	0.0	0.0	0.0	0.0	0.0	0.0	0.0	0.0	0.0	0.0	0.0	0.0	0.0	0.0	0.0	0.0	0.0
ZNF708	7562	symbol	H. sapiens	7562	H. sapiens	0.0	0.0	0.0	0.0	0.0	0.0	0.0	0.0	0.0	0.0	0.0	0.0	0.0	0.0	0.0	0.0	0.0	0.0	0.0	0.0
IST1	9798	symbol	H. sapiens	9798	H. sapiens	0.0	0.0	0.0	0.0	0.0	1.0	0.0	0.0	0.0	0.0	0.0	0.0	0.0	0.0	0.0	0.0	0.0	0.0	0.0	0.0
TSEN54	283989	symbol	H. sapiens	283989	H. sapiens	1.0	0.0	0.0	0.0	0.0	0.0	0.0	0.0	1.0	0.0	0.0	0.0	0.0	0.0	0.0	1.0	0.0	0.0	0.0	0.0
UBA7	7318	symbol	H. sapiens	7318	H. sapiens	0.0	0.0	0.0	0.0	0.0	0.0	0.0	0.0	0.0	0.0	0.0	0.0	0.0	1.0	0.0	0.0	0.0	0.0	0.0	0.0
KCNJ14	3770	symbol	H. sapiens	3770	H. sapiens	0.0	0.0	0.0	0.0	0.0	0.0	0.0	0.0	0.0	0.0	0.0	0.0	0.0	0.0	0.0	0.0	0.0	0.0	0.0	0.0
CEP97	79598	symbol	H. sapiens	79598	H. sapiens	0.0	0.0	1.0	0.0	1.0	1.0	0.0	0.0	0.0	0.0	0.0	1.0	0.0	0.0	0.0	0.0	0.0	0.0	0.0	0.0
C11orf54	28970	symbol	H. sapiens	28970	H. sapiens	0.0	0.0	0.0	0.0	0.0	0.0	0.0	0.0	0.0	0.0	0.0	0.0	0.0	0.0	0.0	0.0	0.0	0.0	0.0	0.0
CNOT10	25904	symbol	H. sapiens	25904	H. sapiens	0.0	0.0	0.0	1.0	1.0	0.0	0.0	0.0	0.0	0.0	0.0	0.0	0.0	0.0	0.0	0.0	0.0	0.0	0.0	0.0
CADM1	23705	symbol	H. sapiens	23705	H. sapiens	0.0	0.0	0.0	0.0	0.0	0.0	0.0	1.0	0.0	0.0	0.0	0.0	0.0	0.0	0.0	0.0	0.0	0.0	0.0	0.0
SLC25A21	89874	symbol	H. sapiens	89874	H. sapiens	0.0	0.0	0.0	0.0	0.0	0.0	0.0	0.0	0.0	0.0	0.0	0.0	1.0	0.0	0.0	0.0	0.0	0.0	0.0	0.0
CEP57L1	285753	symbol	H. sapiens	285753	H. sapiens	0.0	0.0	0.0	0.0	0.0	0.0	0.0	0.0	0.0	0.0	0.0	0.0	0.0	0.0	0.0	0.0	0.0	0.0	0.0	0.0
RUVBL2	10856	symbol	H. sapiens	10856	H. sapiens	1.0	1.0	0.0	0.0	0.0	0.0	0.0	1.0	1.0	0.0	0.0	0.0	0.0	0.0	0.0	0.0	0.0	0.0	1.0	0.0
NDUFB1	4707	symbol	H. sapiens	4707	H. sapiens	0.0	0.0	0.0	1.0	0.0	0.0	0.0	0.0	0.0	0.0	0.0	0.0	0.0	0.0	0.0	0.0	0.0	0.0	1.0	0.0
SMTN	6525	symbol	H. sapiens	6525	H. sapiens	0.0	0.0	0.0	0.0	0.0	0.0	0.0	0.0	0.0	0.0	0.0	0.0	0.0	0.0	0.0	0.0	0.0	1.0	0.0	0.0
TMPRSS2	7113	symbol	H. sapiens	7113	H. sapiens	0.0	0.0	0.0	0.0	0.0	0.0	0.0	0.0	0.0	0.0	0.0	0.0	0.0	0.0	0.0	0.0	0.0	0.0	0.0	0.0
DENND5A	23258	symbol	H. sapiens	23258	H. sapiens	0.0	0.0	0.0	0.0	0.0	0.0	0.0	0.0	0.0	0.0	0.0	0.0	0.0	0.0	0.0	0.0	0.0	0.0	0.0	0.0
CMSS1	84319	symbol	H. sapiens	84319	H. sapiens	0.0	0.0	0.0	0.0	0.0	0.0	0.0	0.0	0.0	0.0	0.0	0.0	0.0	0.0	0.0	0.0	0.0	0.0	0.0	0.0
ZFP1	162239	symbol	H. sapiens	162239	H. sapiens	0.0	0.0	0.0	0.0	0.0	0.0	0.0	0.0	0.0	0.0	0.0	0.0	0.0	0.0	0.0	0.0	0.0	0.0	0.0	0.0
PDE4B	5142	symbol	H. sapiens	5142	H. sapiens	0.0	0.0	0.0	1.0	0.0	0.0	0.0	1.0	0.0	0.0	0.0	0.0	0.0	0.0	0.0	0.0	0.0	1.0	0.0	0.0
B3GALT5-AS1	114041	symbol	H. sapiens	114041	H. sapiens	0.0	0.0	0.0	0.0	0.0	0.0	0.0	0.0	0.0	0.0	0.0	0.0	0.0	0.0	0.0	0.0	0.0	0.0	0.0	0.0
ARMCX2	9823	symbol	H. sapiens	9823	H. sapiens	0.0	0.0	0.0	0.0	0.0	0.0	0.0	0.0	0.0	0.0	0.0	0.0	0.0	0.0	0.0	0.0	0.0	0.0	0.0	0.0
IMMP2L	83943	symbol	H. sapiens	83943	H. sapiens	0.0	0.0	0.0	1.0	0.0	0.0	0.0	0.0	0.0	0.0	0.0	0.0	0.0	0.0	0.0	0.0	0.0	0.0	1.0	0.0
MAFF	23764	symbol	H. sapiens	23764	H. sapiens	0.0	0.0	0.0	0.0	0.0	0.0	0.0	0.0	0.0	0.0	0.0	0.0	0.0	0.0	0.0	0.0	0.0	0.0	0.0	0.0
PRMT3	10196	symbol	H. sapiens	10196	H. sapiens	0.0	1.0	0.0	0.0	0.0	0.0	0.0	0.0	0.0	0.0	0.0	0.0	0.0	0.0	0.0	0.0	0.0	0.0	0.0	0.0
PRPF39	55015	symbol	H. sapiens	55015	H. sapiens	1.0	0.0	0.0	0.0	0.0	0.0	0.0	0.0	1.0	0.0	0.0	0.0	0.0	0.0	0.0	0.0	0.0	0.0	0.0	0.0
C14orf80	283643	gene_synonym	H. sapiens	283643	H. sapiens	0.0	0.0	0.0	0.0	0.0	0.0	0.0	0.0	0.0	0.0	0.0	0.0	0.0	0.0	0.0	0.0	0.0	0.0	0.0	0.0
RAD51D	5892	symbol	H. sapiens	5892	H. sapiens	0.0	0.0	0.0	0.0	0.0	0.0	0.0	0.0	0.0	0.0	0.0	0.0	0.0	0.0	0.0	0.0	0.0	0.0	0.0	0.0
PARPBP	55010	symbol	H. sapiens	55010	H. sapiens	0.0	0.0	0.0	0.0	0.0	0.0	0.0	0.0	0.0	0.0	0.0	0.0	0.0	0.0	0.0	0.0	0.0	0.0	0.0	0.0
PRKG1	5592	symbol	H. sapiens	5592	H. sapiens	0.0	0.0	0.0	0.0	0.0	0.0	1.0	0.0	0.0	0.0	0.0	0.0	0.0	0.0	0.0	0.0	0.0	1.0	0.0	0.0
PSMD13	5719	symbol	H. sapiens	5719	H. sapiens	0.0	0.0	0.0	1.0	1.0	0.0	0.0	1.0	0.0	0.0	0.0	0.0	1.0	1.0	0.0	0.0	0.0	0.0	0.0	0.0
BRWD1	54014	symbol	H. sapiens	54014	H. sapiens	0.0	0.0	0.0	0.0	0.0	0.0	0.0	1.0	0.0	0.0	0.0	0.0	0.0	0.0	0.0	0.0	0.0	0.0	0.0	0.0
PMEL	6490	symbol	H. sapiens	6490	H. sapiens	0.0	0.0	0.0	0.0	0.0	1.0	0.0	0.0	0.0	0.0	0.0	0.0	0.0	0.0	0.0	0.0	0.0	0.0	0.0	0.0
MYBL1	4603	symbol	H. sapiens	4603	H. sapiens	1.0	0.0	0.0	0.0	0.0	0.0	0.0	0.0	0.0	0.0	0.0	0.0	0.0	0.0	0.0	0.0	0.0	0.0	0.0	0.0
ANKFY1	51479	symbol	H. sapiens	51479	H. sapiens	0.0	0.0	0.0	0.0	0.0	1.0	0.0	0.0	0.0	0.0	0.0	0.0	0.0	0.0	0.0	0.0	0.0	0.0	0.0	0.0
DNAH14	127602	symbol	H. sapiens	127602	H. sapiens	0.0	0.0	0.0	0.0	0.0	0.0	0.0	0.0	0.0	0.0	0.0	1.0	0.0	0.0	0.0	0.0	0.0	0.0	0.0	0.0
ZNF566	84924	symbol	H. sapiens	84924	H. sapiens	0.0	0.0	0.0	0.0	0.0	0.0	0.0	0.0	0.0	0.0	0.0	0.0	0.0	0.0	0.0	0.0	0.0	0.0	0.0	0.0
CYP2R1	120227	symbol	H. sapiens	120227	H. sapiens	0.0	0.0	0.0	0.0	0.0	0.0	0.0	0.0	0.0	1.0	0.0	0.0	0.0	0.0	0.0	0.0	0.0	0.0	0.0	0.0
CIDECP	152302	gene_synonym	H. sapiens	152302	H. sapiens	0.0	0.0	0.0	0.0	0.0	0.0	0.0	0.0	0.0	0.0	0.0	0.0	0.0	0.0	0.0	0.0	0.0	0.0	0.0	0.0
POLR1D	51082	symbol	H. sapiens	51082	H. sapiens	0.0	0.0	0.0	0.0	0.0	0.0	0.0	0.0	0.0	0.0	0.0	0.0	0.0	0.0	0.0	0.0	0.0	0.0	0.0	0.0
Sep-10						nan	nan	nan	nan	nan	nan	nan	nan	nan	nan	nan	nan	nan	nan	nan	nan	nan	nan	nan	nan
UBE2H	7328	symbol	H. sapiens	7328	H. sapiens	0.0	0.0	0.0	0.0	0.0	0.0	0.0	0.0	0.0	0.0	0.0	0.0	0.0	1.0	0.0	0.0	0.0	0.0	0.0	0.0
MIR22HG	84981	symbol	H. sapiens	84981	H. sapiens	0.0	0.0	0.0	0.0	0.0	0.0	0.0	0.0	0.0	0.0	0.0	0.0	0.0	0.0	0.0	0.0	0.0	0.0	0.0	0.0
C17orf58	284018	symbol	H. sapiens	284018	H. sapiens	0.0	0.0	0.0	0.0	0.0	0.0	0.0	0.0	0.0	0.0	0.0	0.0	0.0	0.0	0.0	0.0	0.0	0.0	0.0	0.0
SPIN2B	474343	symbol	H. sapiens	474343	H. sapiens	0.0	0.0	0.0	0.0	0.0	0.0	0.0	0.0	0.0	0.0	0.0	0.0	0.0	0.0	0.0	0.0	0.0	0.0	0.0	0.0
CMC1	152100	symbol	H. sapiens	152100	H. sapiens	0.0	0.0	0.0	0.0	0.0	0.0	0.0	0.0	0.0	0.0	0.0	0.0	0.0	0.0	0.0	0.0	0.0	0.0	0.0	0.0
BAGE2	85319	symbol	H. sapiens	85319	H. sapiens	0.0	0.0	0.0	0.0	0.0	0.0	0.0	0.0	0.0	0.0	0.0	0.0	0.0	0.0	0.0	0.0	0.0	0.0	0.0	0.0
EPOR	2057	symbol	H. sapiens	2057	H. sapiens	0.0	0.0	0.0	0.0	0.0	0.0	0.0	1.0	0.0	0.0	0.0	0.0	0.0	0.0	0.0	0.0	0.0	0.0	0.0	0.0
ZNF286A	57335	symbol	H. sapiens	57335	H. sapiens	0.0	0.0	0.0	0.0	0.0	0.0	0.0	0.0	0.0	0.0	0.0	0.0	0.0	0.0	0.0	0.0	0.0	0.0	0.0	0.0
FANCA	2175	symbol	H. sapiens	2175	H. sapiens	0.0	0.0	0.0	0.0	0.0	0.0	0.0	0.0	0.0	0.0	0.0	0.0	0.0	0.0	0.0	0.0	0.0	0.0	0.0	0.0
FANCM	57697	symbol	H. sapiens	57697	H. sapiens	0.0	0.0	0.0	0.0	0.0	0.0	0.0	0.0	0.0	0.0	0.0	0.0	0.0	0.0	0.0	0.0	0.0	0.0	0.0	0.0
CYHR1	50626	symbol	H. sapiens	50626	H. sapiens	0.0	0.0	0.0	0.0	0.0	0.0	0.0	0.0	0.0	0.0	0.0	0.0	0.0	0.0	0.0	0.0	0.0	0.0	0.0	0.0
MAPK12	6300	symbol	H. sapiens	6300	H. sapiens	0.0	0.0	0.0	0.0	1.0	0.0	1.0	0.0	0.0	0.0	0.0	0.0	0.0	0.0	0.0	0.0	0.0	0.0	0.0	0.0
C3orf62	375341	symbol	H. sapiens	375341	H. sapiens	0.0	0.0	0.0	0.0	0.0	0.0	0.0	0.0	0.0	0.0	0.0	0.0	0.0	0.0	0.0	0.0	0.0	0.0	0.0	0.0
ZNF559	84527	symbol	H. sapiens	84527	H. sapiens	0.0	0.0	0.0	0.0	0.0	0.0	0.0	0.0	0.0	0.0	0.0	0.0	0.0	0.0	0.0	0.0	0.0	0.0	0.0	0.0
C19orf54	284325	symbol	H. sapiens	284325	H. sapiens	0.0	0.0	0.0	0.0	0.0	0.0	0.0	0.0	0.0	0.0	0.0	0.0	0.0	0.0	0.0	0.0	0.0	0.0	0.0	0.0
NDOR1	27158	symbol	H. sapiens	27158	H. sapiens	0.0	0.0	0.0	1.0	0.0	0.0	0.0	0.0	0.0	0.0	0.0	0.0	1.0	0.0	0.0	0.0	0.0	0.0	0.0	0.0
ASAH2	56624	symbol	H. sapiens	56624	H. sapiens	0.0	0.0	0.0	1.0	1.0	0.0	0.0	0.0	0.0	1.0	0.0	0.0	0.0	0.0	0.0	0.0	0.0	0.0	0.0	0.0
JPT1	51155	symbol	H. sapiens	51155	H. sapiens	0.0	0.0	0.0	0.0	0.0	0.0	0.0	0.0	0.0	0.0	0.0	0.0	0.0	0.0	0.0	0.0	0.0	0.0	0.0	0.0
PAX8-AS1	654433	symbol	H. sapiens	654433	H. sapiens	0.0	0.0	0.0	0.0	0.0	0.0	0.0	0.0	0.0	0.0	0.0	0.0	0.0	0.0	0.0	0.0	0.0	0.0	0.0	0.0
S100A14	57402	symbol	H. sapiens	57402	H. sapiens	0.0	0.0	0.0	0.0	0.0	0.0	0.0	1.0	0.0	0.0	0.0	0.0	0.0	0.0	0.0	0.0	0.0	0.0	0.0	0.0
SERPINA3	12	symbol	H. sapiens	12	H. sapiens	0.0	0.0	0.0	0.0	0.0	0.0	0.0	0.0	0.0	0.0	0.0	0.0	0.0	0.0	0.0	0.0	0.0	0.0	0.0	0.0
SPATS2L	26010	symbol	H. sapiens	26010	H. sapiens	0.0	0.0	0.0	0.0	0.0	0.0	0.0	0.0	0.0	0.0	0.0	0.0	0.0	0.0	0.0	0.0	0.0	0.0	0.0	0.0
ZNF681	148213	symbol	H. sapiens	148213	H. sapiens	0.0	0.0	0.0	0.0	0.0	0.0	0.0	0.0	0.0	0.0	0.0	0.0	0.0	0.0	0.0	0.0	0.0	0.0	0.0	0.0
TMEM63A	9725	symbol	H. sapiens	9725	H. sapiens	0.0	0.0	0.0	0.0	0.0	0.0	0.0	0.0	0.0	0.0	0.0	0.0	0.0	0.0	0.0	0.0	0.0	0.0	0.0	0.0
TSC22D2	9819	symbol	H. sapiens	9819	H. sapiens	0.0	0.0	0.0	0.0	0.0	0.0	0.0	0.0	0.0	0.0	0.0	0.0	0.0	0.0	0.0	0.0	0.0	0.0	0.0	0.0
IPO4	79711	symbol	H. sapiens	79711	H. sapiens	0.0	0.0	0.0	0.0	0.0	0.0	0.0	0.0	0.0	0.0	0.0	0.0	0.0	0.0	0.0	0.0	0.0	0.0	1.0	0.0
NCOR2	9612	symbol	H. sapiens	9612	H. sapiens	0.0	0.0	0.0	0.0	0.0	0.0	0.0	1.0	0.0	0.0	0.0	0.0	0.0	0.0	0.0	0.0	0.0	0.0	0.0	0.0
SULT1A1	6817	symbol	H. sapiens	6817	H. sapiens	0.0	0.0	0.0	1.0	0.0	0.0	0.0	0.0	0.0	0.0	0.0	0.0	1.0	0.0	0.0	0.0	0.0	0.0	0.0	0.0
SLC6A9	6536	symbol	H. sapiens	6536	H. sapiens	0.0	0.0	0.0	0.0	0.0	0.0	0.0	0.0	0.0	0.0	0.0	0.0	0.0	0.0	0.0	0.0	0.0	0.0	0.0	0.0
AFAP1	60312	symbol	H. sapiens	60312	H. sapiens	0.0	0.0	0.0	0.0	0.0	0.0	0.0	0.0	0.0	0.0	0.0	1.0	0.0	0.0	0.0	0.0	0.0	0.0	0.0	0.0
NACA	4666	symbol	H. sapiens	4666	H. sapiens	0.0	0.0	0.0	0.0	0.0	0.0	0.0	0.0	0.0	0.0	0.0	0.0	0.0	0.0	0.0	0.0	0.0	0.0	0.0	0.0
MYO18A	399687	symbol	H. sapiens	399687	H. sapiens	0.0	0.0	0.0	0.0	0.0	1.0	0.0	0.0	0.0	0.0	0.0	0.0	0.0	0.0	0.0	0.0	0.0	1.0	0.0	0.0
HDAC2	3066	symbol	H. sapiens	3066	H. sapiens	0.0	1.0	0.0	0.0	0.0	0.0	0.0	0.0	0.0	0.0	0.0	0.0	0.0	0.0	0.0	0.0	0.0	0.0	0.0	0.0
ZNF136	7695	symbol	H. sapiens	7695	H. sapiens	0.0	0.0	0.0	0.0	0.0	0.0	0.0	0.0	0.0	0.0	0.0	0.0	0.0	0.0	0.0	0.0	0.0	0.0	0.0	0.0
ZFP62	643836	symbol	H. sapiens	643836	H. sapiens	0.0	0.0	0.0	0.0	0.0	0.0	0.0	0.0	0.0	0.0	0.0	0.0	0.0	0.0	0.0	0.0	0.0	0.0	0.0	0.0
AMZ2	51321	symbol	H. sapiens	51321	H. sapiens	0.0	0.0	0.0	0.0	0.0	0.0	0.0	0.0	0.0	0.0	0.0	0.0	0.0	0.0	0.0	0.0	0.0	0.0	0.0	0.0
NF1	4763	symbol	H. sapiens	4763	H. sapiens	0.0	0.0	0.0	0.0	0.0	0.0	1.0	0.0	0.0	0.0	0.0	0.0	0.0	0.0	0.0	0.0	0.0	1.0	1.0	0.0
ZNF418	147686	symbol	H. sapiens	147686	H. sapiens	0.0	0.0	0.0	0.0	0.0	0.0	0.0	0.0	0.0	0.0	0.0	0.0	0.0	0.0	0.0	0.0	0.0	0.0	0.0	0.0
COL27A1	85301	symbol	H. sapiens	85301	H. sapiens	0.0	0.0	0.0	0.0	0.0	0.0	0.0	0.0	0.0	0.0	0.0	0.0	0.0	0.0	0.0	0.0	0.0	0.0	0.0	0.0
SNHG17	388796	symbol	H. sapiens	388796	H. sapiens	0.0	0.0	0.0	0.0	0.0	0.0	0.0	0.0	0.0	0.0	0.0	0.0	0.0	0.0	0.0	0.0	0.0	0.0	0.0	0.0
STRN3	29966	symbol	H. sapiens	29966	H. sapiens	0.0	0.0	0.0	0.0	0.0	0.0	0.0	0.0	0.0	0.0	0.0	0.0	0.0	0.0	0.0	0.0	0.0	0.0	0.0	0.0
SCN8A	6334	symbol	H. sapiens	6334	H. sapiens	0.0	0.0	0.0	0.0	0.0	0.0	0.0	0.0	0.0	0.0	0.0	0.0	0.0	0.0	0.0	0.0	0.0	0.0	0.0	0.0
ZNF138	7697	symbol	H. sapiens	7697	H. sapiens	0.0	0.0	0.0	0.0	0.0	0.0	0.0	0.0	0.0	0.0	0.0	0.0	0.0	0.0	0.0	0.0	0.0	0.0	0.0	0.0
CXorf40B	541578	symbol	H. sapiens	541578	H. sapiens	0.0	0.0	0.0	0.0	0.0	0.0	0.0	0.0	0.0	0.0	0.0	0.0	0.0	0.0	0.0	0.0	0.0	0.0	0.0	0.0
GMFB	2764	symbol	H. sapiens	2764	H. sapiens	0.0	0.0	0.0	0.0	0.0	0.0	0.0	0.0	0.0	0.0	0.0	1.0	0.0	0.0	0.0	0.0	0.0	1.0	0.0	0.0
SLC25A29	123096	symbol	H. sapiens	123096	H. sapiens	0.0	0.0	0.0	0.0	0.0	0.0	0.0	0.0	0.0	0.0	0.0	0.0	0.0	0.0	0.0	0.0	0.0	0.0	1.0	0.0
C1D	10438	symbol	H. sapiens	10438	H. sapiens	1.0	0.0	0.0	0.0	0.0	0.0	0.0	0.0	0.0	0.0	0.0	0.0	0.0	0.0	0.0	0.0	0.0	0.0	0.0	0.0
ZNF720	124411	symbol	H. sapiens	124411	H. sapiens	0.0	0.0	0.0	0.0	0.0	0.0	0.0	0.0	0.0	0.0	0.0	0.0	0.0	0.0	0.0	0.0	0.0	0.0	0.0	0.0
ZNF628	89887	symbol	H. sapiens	89887	H. sapiens	0.0	0.0	0.0	0.0	0.0	0.0	0.0	0.0	0.0	0.0	0.0	0.0	0.0	0.0	0.0	0.0	0.0	0.0	0.0	0.0
MIB2	142678	symbol	H. sapiens	142678	H. sapiens	0.0	0.0	0.0	0.0	0.0	0.0	0.0	0.0	0.0	0.0	0.0	0.0	0.0	1.0	0.0	0.0	0.0	0.0	0.0	0.0
PIGN	23556	symbol	H. sapiens	23556	H. sapiens	0.0	0.0	0.0	1.0	0.0	0.0	0.0	0.0	0.0	1.0	0.0	0.0	0.0	0.0	0.0	0.0	0.0	0.0	0.0	0.0
ENTPD6	955	symbol	H. sapiens	955	H. sapiens	0.0	0.0	0.0	1.0	0.0	0.0	0.0	0.0	0.0	0.0	0.0	0.0	0.0	0.0	0.0	0.0	0.0	0.0	0.0	0.0
ZNF615	284370	symbol	H. sapiens	284370	H. sapiens	0.0	0.0	0.0	0.0	0.0	0.0	0.0	0.0	0.0	0.0	0.0	0.0	0.0	0.0	0.0	0.0	0.0	0.0	0.0	0.0
ZNF433	163059	symbol	H. sapiens	163059	H. sapiens	0.0	0.0	0.0	0.0	0.0	0.0	0.0	0.0	0.0	0.0	0.0	0.0	0.0	0.0	0.0	0.0	0.0	0.0	0.0	0.0
ZNF780A	284323	symbol	H. sapiens	284323	H. sapiens	0.0	0.0	0.0	0.0	0.0	0.0	0.0	0.0	0.0	0.0	0.0	0.0	0.0	0.0	0.0	0.0	0.0	0.0	0.0	0.0
ZNF461	92283	symbol	H. sapiens	92283	H. sapiens	0.0	0.0	0.0	0.0	0.0	0.0	0.0	0.0	0.0	0.0	0.0	0.0	0.0	0.0	0.0	0.0	0.0	0.0	0.0	0.0
ZNF44	51710	symbol	H. sapiens	51710	H. sapiens	0.0	0.0	0.0	0.0	0.0	0.0	0.0	0.0	0.0	0.0	0.0	0.0	0.0	0.0	0.0	0.0	0.0	0.0	0.0	0.0
MRPL42	28977	symbol	H. sapiens	28977	H. sapiens	0.0	0.0	0.0	0.0	0.0	0.0	0.0	0.0	0.0	0.0	0.0	0.0	0.0	0.0	0.0	0.0	0.0	0.0	0.0	0.0
SFI1	9814	symbol	H. sapiens	9814	H. sapiens	0.0	0.0	1.0	0.0	1.0	1.0	0.0	0.0	0.0	0.0	0.0	0.0	0.0	0.0	0.0	0.0	0.0	0.0	0.0	0.0
ZNF251	90987	symbol	H. sapiens	90987	H. sapiens	0.0	0.0	0.0	0.0	0.0	0.0	0.0	0.0	0.0	0.0	0.0	0.0	0.0	0.0	0.0	0.0	0.0	0.0	0.0	0.0
ZNF607	84775	symbol	H. sapiens	84775	H. sapiens	0.0	0.0	0.0	0.0	0.0	0.0	0.0	0.0	0.0	0.0	0.0	0.0	0.0	0.0	0.0	0.0	0.0	0.0	0.0	0.0
STYX	6815	symbol	H. sapiens	6815	H. sapiens	0.0	0.0	0.0	0.0	0.0	0.0	0.0	1.0	0.0	0.0	0.0	0.0	0.0	1.0	0.0	0.0	0.0	0.0	0.0	0.0
HELZ	9931	symbol	H. sapiens	9931	H. sapiens	0.0	0.0	0.0	0.0	0.0	0.0	0.0	0.0	0.0	0.0	0.0	0.0	0.0	0.0	0.0	0.0	0.0	0.0	0.0	0.0
TCAF1	9747	symbol	H. sapiens	9747	H. sapiens	0.0	0.0	0.0	0.0	0.0	0.0	0.0	0.0	0.0	0.0	0.0	0.0	0.0	0.0	0.0	0.0	0.0	0.0	1.0	0.0
YTHDF2	51441	symbol	H. sapiens	51441	H. sapiens	0.0	0.0	0.0	1.0	1.0	0.0	0.0	1.0	0.0	0.0	0.0	0.0	0.0	0.0	0.0	0.0	0.0	0.0	0.0	0.0
MMP17	4326	symbol	H. sapiens	4326	H. sapiens	0.0	0.0	0.0	0.0	0.0	0.0	0.0	0.0	0.0	0.0	0.0	0.0	0.0	0.0	0.0	0.0	0.0	0.0	0.0	0.0
CEP290	80184	symbol	H. sapiens	80184	H. sapiens	0.0	0.0	1.0	0.0	1.0	1.0	0.0	0.0	0.0	0.0	0.0	0.0	0.0	0.0	0.0	0.0	0.0	0.0	0.0	0.0
ANKRD13B	124930	symbol	H. sapiens	124930	H. sapiens	0.0	0.0	0.0	0.0	0.0	0.0	0.0	0.0	0.0	0.0	0.0	0.0	0.0	0.0	0.0	0.0	0.0	0.0	0.0	0.0
UNC13B	10497	symbol	H. sapiens	10497	H. sapiens	0.0	0.0	1.0	0.0	0.0	1.0	0.0	1.0	0.0	0.0	0.0	0.0	0.0	0.0	0.0	0.0	0.0	0.0	0.0	0.0
GPATCH3	63906	symbol	H. sapiens	63906	H. sapiens	0.0	0.0	0.0	0.0	0.0	0.0	0.0	1.0	0.0	0.0	0.0	0.0	0.0	0.0	0.0	0.0	0.0	0.0	0.0	0.0
CDC42BPB	9578	symbol	H. sapiens	9578	H. sapiens	0.0	0.0	0.0	0.0	0.0	0.0	0.0	0.0	0.0	0.0	0.0	0.0	0.0	0.0	0.0	0.0	0.0	1.0	0.0	0.0
APRT	353	symbol	H. sapiens	353	H. sapiens	0.0	0.0	0.0	1.0	0.0	0.0	0.0	0.0	0.0	0.0	0.0	0.0	0.0	0.0	0.0	0.0	0.0	0.0	0.0	0.0
FANK1	92565	symbol	H. sapiens	92565	H. sapiens	0.0	0.0	0.0	0.0	0.0	0.0	0.0	0.0	0.0	0.0	0.0	0.0	0.0	0.0	0.0	0.0	0.0	0.0	0.0	0.0
GDI1	2664	symbol	H. sapiens	2664	H. sapiens	0.0	0.0	0.0	0.0	0.0	0.0	1.0	0.0	0.0	0.0	0.0	0.0	0.0	0.0	0.0	0.0	0.0	0.0	1.0	0.0
PCMTD2	55251	symbol	H. sapiens	55251	H. sapiens	0.0	1.0	0.0	0.0	0.0	0.0	0.0	0.0	0.0	0.0	0.0	0.0	0.0	0.0	0.0	0.0	0.0	0.0	0.0	0.0
RTL8A	26071	symbol	H. sapiens	26071	H. sapiens	0.0	0.0	0.0	0.0	0.0	0.0	0.0	0.0	0.0	0.0	0.0	0.0	0.0	0.0	0.0	0.0	0.0	0.0	0.0	0.0
ARRDC1-AS1	85026	symbol	H. sapiens	85026	H. sapiens	0.0	0.0	0.0	0.0	0.0	0.0	0.0	0.0	0.0	0.0	0.0	0.0	0.0	0.0	0.0	0.0	0.0	0.0	0.0	0.0
CHIC1	53344	symbol	H. sapiens	53344	H. sapiens	0.0	0.0	0.0	0.0	0.0	0.0	0.0	0.0	0.0	0.0	0.0	0.0	0.0	0.0	0.0	0.0	0.0	0.0	0.0	0.0
OXLD1	339229	symbol	H. sapiens	339229	H. sapiens	0.0	0.0	0.0	0.0	0.0	0.0	0.0	0.0	0.0	0.0	0.0	0.0	0.0	0.0	0.0	0.0	0.0	0.0	0.0	0.0
SPIN3	169981	symbol	H. sapiens	169981	H. sapiens	0.0	0.0	0.0	0.0	0.0	0.0	0.0	0.0	0.0	0.0	0.0	0.0	0.0	0.0	0.0	0.0	0.0	0.0	0.0	0.0
NFKBIL1	4795	symbol	H. sapiens	4795	H. sapiens	0.0	0.0	0.0	0.0	0.0	0.0	0.0	1.0	0.0	0.0	0.0	0.0	0.0	0.0	0.0	0.0	0.0	0.0	0.0	0.0
MICB	4277	symbol	H. sapiens	4277	H. sapiens	0.0	0.0	0.0	0.0	0.0	0.0	0.0	1.0	0.0	0.0	0.0	0.0	0.0	0.0	0.0	0.0	0.0	0.0	0.0	0.0
MRPS18B	28973	symbol	H. sapiens	28973	H. sapiens	0.0	0.0	0.0	0.0	0.0	0.0	0.0	0.0	0.0	0.0	0.0	0.0	0.0	0.0	0.0	0.0	0.0	0.0	0.0	0.0
RANBP17	64901	symbol	H. sapiens	64901	H. sapiens	0.0	0.0	0.0	0.0	0.0	0.0	0.0	0.0	0.0	0.0	0.0	0.0	0.0	0.0	0.0	0.0	0.0	0.0	1.0	0.0
SLC35B4	84912	symbol	H. sapiens	84912	H. sapiens	0.0	0.0	0.0	1.0	0.0	0.0	0.0	1.0	0.0	0.0	0.0	0.0	0.0	0.0	0.0	0.0	0.0	0.0	0.0	0.0
TRIQK	286144	symbol	H. sapiens	286144	H. sapiens	0.0	0.0	0.0	0.0	0.0	0.0	0.0	0.0	0.0	0.0	0.0	0.0	0.0	0.0	0.0	0.0	0.0	0.0	0.0	0.0
PSMB10	5699	symbol	H. sapiens	5699	H. sapiens	0.0	0.0	0.0	1.0	1.0	0.0	0.0	1.0	0.0	0.0	0.0	0.0	1.0	1.0	0.0	0.0	0.0	0.0	0.0	0.0
EXOC3L4	91828	symbol	H. sapiens	91828	H. sapiens	0.0	0.0	0.0	0.0	0.0	0.0	0.0	0.0	0.0	0.0	0.0	0.0	0.0	0.0	0.0	0.0	0.0	0.0	0.0	0.0
NAP1L4	4676	symbol	H. sapiens	4676	H. sapiens	0.0	0.0	0.0	0.0	0.0	0.0	0.0	0.0	0.0	0.0	0.0	0.0	0.0	0.0	0.0	0.0	0.0	0.0	0.0	0.0
RNPS1	10921	symbol	H. sapiens	10921	H. sapiens	0.0	0.0	0.0	1.0	0.0	0.0	0.0	1.0	1.0	0.0	0.0	0.0	0.0	0.0	0.0	0.0	0.0	0.0	0.0	0.0
DNAJC19	131118	symbol	H. sapiens	131118	H. sapiens	0.0	0.0	0.0	0.0	0.0	0.0	1.0	0.0	0.0	0.0	0.0	0.0	0.0	0.0	0.0	0.0	0.0	0.0	1.0	0.0
JPT2	90861	symbol	H. sapiens	90861	H. sapiens	0.0	0.0	0.0	0.0	0.0	0.0	0.0	0.0	0.0	0.0	0.0	0.0	0.0	0.0	0.0	0.0	0.0	0.0	0.0	0.0
GPX3	2878	symbol	H. sapiens	2878	H. sapiens	0.0	0.0	0.0	1.0	0.0	0.0	0.0	0.0	0.0	0.0	0.0	0.0	0.0	0.0	0.0	0.0	0.0	0.0	0.0	0.0
ZNF611	81856	symbol	H. sapiens	81856	H. sapiens	0.0	0.0	0.0	0.0	0.0	0.0	0.0	0.0	0.0	0.0	0.0	0.0	0.0	0.0	0.0	0.0	0.0	0.0	0.0	0.0
NOC2LP1	643276	symbol	H. sapiens	643276	H. sapiens	0.0	0.0	0.0	0.0	0.0	0.0	0.0	0.0	0.0	0.0	0.0	0.0	0.0	0.0	0.0	0.0	0.0	0.0	0.0	0.0
SIPA1	6494	symbol	H. sapiens	6494	H. sapiens	0.0	0.0	0.0	0.0	1.0	0.0	1.0	0.0	0.0	0.0	0.0	0.0	0.0	0.0	0.0	0.0	0.0	0.0	0.0	0.0
TMX2	51075	symbol	H. sapiens	51075	H. sapiens	0.0	0.0	0.0	0.0	0.0	0.0	0.0	0.0	0.0	0.0	0.0	0.0	0.0	0.0	0.0	0.0	0.0	0.0	0.0	0.0
SLX1A-SULT1A3	100526830	symbol	H. sapiens	100526830	H. sapiens	0.0	0.0	0.0	0.0	0.0	0.0	0.0	0.0	0.0	0.0	0.0	0.0	0.0	0.0	0.0	0.0	0.0	0.0	0.0	0.0
NCKIPSD	51517	symbol	H. sapiens	51517	H. sapiens	0.0	0.0	0.0	0.0	0.0	0.0	0.0	1.0	0.0	0.0	0.0	0.0	0.0	0.0	0.0	0.0	0.0	0.0	0.0	0.0
TREX1	11277	symbol	H. sapiens	11277	H. sapiens	0.0	0.0	0.0	1.0	1.0	0.0	0.0	1.0	0.0	1.0	0.0	0.0	0.0	0.0	0.0	0.0	0.0	0.0	0.0	0.0
DDX47	51202	symbol	H. sapiens	51202	H. sapiens	1.0	0.0	0.0	0.0	0.0	0.0	0.0	0.0	1.0	0.0	0.0	0.0	0.0	0.0	0.0	0.0	0.0	0.0	0.0	0.0
PPM1N	147699	symbol	H. sapiens	147699	H. sapiens	0.0	0.0	0.0	0.0	0.0	0.0	0.0	0.0	0.0	0.0	0.0	0.0	0.0	0.0	0.0	0.0	0.0	0.0	0.0	0.0
DNASE1	1773	symbol	H. sapiens	1773	H. sapiens	0.0	0.0	0.0	1.0	0.0	0.0	0.0	0.0	0.0	0.0	0.0	0.0	0.0	0.0	0.0	0.0	0.0	0.0	0.0	0.0
GALT	2592	symbol	H. sapiens	2592	H. sapiens	0.0	0.0	0.0	1.0	0.0	0.0	0.0	0.0	0.0	0.0	0.0	0.0	0.0	0.0	0.0	0.0	0.0	0.0	0.0	0.0
AP1G2	8906	symbol	H. sapiens	8906	H. sapiens	0.0	0.0	0.0	0.0	0.0	0.0	0.0	0.0	0.0	0.0	0.0	0.0	0.0	0.0	0.0	0.0	0.0	0.0	0.0	0.0
TTLL3	26140	symbol	H. sapiens	26140	H. sapiens	0.0	0.0	1.0	0.0	0.0	0.0	0.0	0.0	0.0	0.0	0.0	1.0	0.0	0.0	0.0	0.0	0.0	0.0	0.0	0.0
CPNE1	8904	symbol	H. sapiens	8904	H. sapiens	0.0	0.0	0.0	1.0	0.0	0.0	0.0	1.0	0.0	1.0	0.0	0.0	0.0	0.0	0.0	0.0	0.0	0.0	0.0	0.0
AC132008.2						nan	nan	nan	nan	nan	nan	nan	nan	nan	nan	nan	nan	nan	nan	nan	nan	nan	nan	nan	nan
ALG3	10195	symbol	H. sapiens	10195	H. sapiens	0.0	0.0	0.0	1.0	0.0	0.0	0.0	0.0	0.0	0.0	0.0	0.0	0.0	0.0	0.0	0.0	0.0	0.0	0.0	0.0
METTL12	751071	gene_synonym	H. sapiens	751071	H. sapiens	0.0	1.0	0.0	0.0	0.0	0.0	0.0	0.0	0.0	0.0	0.0	0.0	0.0	0.0	0.0	0.0	0.0	0.0	0.0	0.0
LINC00680	106660612	symbol	H. sapiens	106660612	H. sapiens	0.0	0.0	0.0	0.0	0.0	0.0	0.0	0.0	0.0	0.0	0.0	0.0	0.0	0.0	0.0	0.0	0.0	0.0	0.0	0.0
PEX26	55670	symbol	H. sapiens	55670	H. sapiens	0.0	0.0	0.0	0.0	0.0	0.0	0.0	0.0	0.0	0.0	0.0	0.0	0.0	0.0	0.0	0.0	0.0	0.0	1.0	0.0
MIR99AHG	388815	symbol	H. sapiens	388815	H. sapiens	0.0	0.0	0.0	0.0	0.0	0.0	0.0	0.0	0.0	0.0	0.0	0.0	0.0	0.0	0.0	0.0	0.0	0.0	0.0	0.0
CROCCP2	84809	symbol	H. sapiens	84809	H. sapiens	0.0	0.0	0.0	0.0	0.0	0.0	0.0	0.0	0.0	0.0	0.0	0.0	0.0	0.0	0.0	0.0	0.0	0.0	0.0	0.0
FNIP1	96459	symbol	H. sapiens	96459	H. sapiens	0.0	0.0	0.0	0.0	0.0	0.0	0.0	1.0	0.0	0.0	0.0	0.0	0.0	0.0	0.0	0.0	0.0	0.0	1.0	0.0
RNASEK	440400	symbol	H. sapiens	440400	H. sapiens	0.0	0.0	0.0	0.0	0.0	0.0	0.0	0.0	0.0	0.0	0.0	0.0	0.0	0.0	0.0	0.0	0.0	0.0	0.0	0.0
AP4M1	9179	symbol	H. sapiens	9179	H. sapiens	0.0	0.0	0.0	0.0	0.0	0.0	0.0	0.0	0.0	0.0	0.0	0.0	0.0	0.0	0.0	0.0	0.0	0.0	1.0	0.0
FAM200A	221786	symbol	H. sapiens	221786	H. sapiens	0.0	0.0	0.0	0.0	0.0	0.0	0.0	0.0	0.0	0.0	0.0	0.0	0.0	0.0	0.0	0.0	0.0	0.0	0.0	0.0
CCNL2	81669	symbol	H. sapiens	81669	H. sapiens	0.0	0.0	0.0	0.0	0.0	0.0	0.0	0.0	0.0	0.0	0.0	0.0	0.0	0.0	0.0	0.0	0.0	0.0	0.0	0.0
PPT2	9374	symbol	H. sapiens	9374	H. sapiens	0.0	0.0	0.0	1.0	0.0	0.0	0.0	0.0	0.0	0.0	0.0	0.0	1.0	0.0	0.0	0.0	0.0	0.0	0.0	0.0
EPB41L4A-AS1	114915	symbol	H. sapiens	114915	H. sapiens	0.0	0.0	0.0	0.0	0.0	0.0	0.0	0.0	0.0	0.0	0.0	0.0	0.0	0.0	0.0	0.0	0.0	0.0	0.0	0.0
SLC25A5-AS1	100303728	symbol	H. sapiens	100303728	H. sapiens	0.0	0.0	0.0	0.0	0.0	0.0	0.0	0.0	0.0	0.0	0.0	0.0	0.0	0.0	0.0	0.0	0.0	0.0	0.0	0.0
PLEKHM1	9842	symbol	H. sapiens	9842	H. sapiens	0.0	0.0	1.0	0.0	0.0	1.0	0.0	0.0	0.0	0.0	0.0	0.0	0.0	0.0	0.0	0.0	1.0	0.0	0.0	0.0
AC016027.1						nan	nan	nan	nan	nan	nan	nan	nan	nan	nan	nan	nan	nan	nan	nan	nan	nan	nan	nan	nan
NUTM2B-AS1	101060691	symbol	H. sapiens	101060691	H. sapiens	0.0	0.0	0.0	0.0	0.0	0.0	0.0	0.0	0.0	0.0	0.0	0.0	0.0	0.0	0.0	0.0	0.0	0.0	0.0	0.0
BAIAP2-AS1	440465	gene_synonym	H. sapiens	440465	H. sapiens	0.0	0.0	0.0	0.0	0.0	0.0	0.0	0.0	0.0	0.0	0.0	0.0	0.0	0.0	0.0	0.0	0.0	0.0	0.0	0.0
TMEM191A	84222	symbol	H. sapiens	84222	H. sapiens	0.0	0.0	0.0	0.0	0.0	0.0	0.0	0.0	0.0	0.0	0.0	0.0	0.0	0.0	0.0	0.0	0.0	0.0	0.0	0.0
PSMD5-AS1	253039	gene_synonym	H. sapiens	253039	H. sapiens	0.0	0.0	0.0	0.0	0.0	0.0	0.0	0.0	0.0	0.0	0.0	0.0	0.0	0.0	0.0	0.0	0.0	0.0	0.0	0.0
LINC00511	400619	symbol	H. sapiens	400619	H. sapiens	0.0	0.0	0.0	0.0	0.0	0.0	0.0	0.0	0.0	0.0	0.0	0.0	0.0	0.0	0.0	0.0	0.0	0.0	0.0	0.0
PARG	8505	symbol	H. sapiens	8505	H. sapiens	0.0	0.0	0.0	1.0	0.0	0.0	0.0	0.0	0.0	0.0	0.0	0.0	0.0	0.0	0.0	0.0	0.0	0.0	0.0	0.0
LTB	4050	symbol	H. sapiens	4050	H. sapiens	0.0	0.0	0.0	0.0	0.0	0.0	0.0	1.0	0.0	0.0	0.0	0.0	0.0	0.0	0.0	0.0	0.0	0.0	0.0	0.0
C19orf24	55009	gene_synonym	H. sapiens	55009	H. sapiens	0.0	0.0	0.0	0.0	0.0	0.0	0.0	0.0	0.0	0.0	0.0	0.0	0.0	0.0	0.0	0.0	0.0	0.0	0.0	0.0
AL450306.1						nan	nan	nan	nan	nan	nan	nan	nan	nan	nan	nan	nan	nan	nan	nan	nan	nan	nan	nan	nan
RPL41	6171	symbol	H. sapiens	6171	H. sapiens	0.0	0.0	0.0	1.0	0.0	0.0	0.0	0.0	0.0	0.0	0.0	0.0	0.0	0.0	0.0	0.0	0.0	0.0	1.0	0.0
THAP7-AS1	439931	symbol	H. sapiens	439931	H. sapiens	0.0	0.0	0.0	0.0	0.0	0.0	0.0	0.0	0.0	0.0	0.0	0.0	0.0	0.0	0.0	0.0	0.0	0.0	0.0	0.0
AC092683.1						nan	nan	nan	nan	nan	nan	nan	nan	nan	nan	nan	nan	nan	nan	nan	nan	nan	nan	nan	nan
AL359915.2						nan	nan	nan	nan	nan	nan	nan	nan	nan	nan	nan	nan	nan	nan	nan	nan	nan	nan	nan	nan
SNHG15	285958	symbol	H. sapiens	285958	H. sapiens	0.0	0.0	0.0	0.0	0.0	0.0	0.0	0.0	0.0	0.0	0.0	0.0	0.0	0.0	0.0	0.0	0.0	0.0	0.0	0.0
USP32P2	220594	symbol	H. sapiens	220594	H. sapiens	0.0	0.0	0.0	0.0	0.0	0.0	0.0	0.0	0.0	0.0	0.0	0.0	0.0	0.0	0.0	0.0	0.0	0.0	0.0	0.0
HOTAIRM1	100506311	symbol	H. sapiens	100506311	H. sapiens	0.0	0.0	0.0	0.0	0.0	0.0	0.0	0.0	0.0	0.0	0.0	0.0	0.0	0.0	0.0	0.0	0.0	0.0	0.0	0.0
RNASEH1-AS1	100506054	symbol	H. sapiens	100506054	H. sapiens	0.0	0.0	0.0	0.0	0.0	0.0	0.0	0.0	0.0	0.0	0.0	0.0	0.0	0.0	0.0	0.0	0.0	0.0	0.0	0.0
SDCBP2-AS1	100507495	symbol	H. sapiens	100507495	H. sapiens	0.0	0.0	0.0	0.0	0.0	0.0	0.0	0.0	0.0	0.0	0.0	0.0	0.0	0.0	0.0	0.0	0.0	0.0	0.0	0.0
GAS5	60674	symbol	H. sapiens	60674	H. sapiens	0.0	0.0	0.0	0.0	0.0	0.0	0.0	0.0	0.0	0.0	0.0	0.0	0.0	0.0	0.0	0.0	0.0	0.0	0.0	0.0
AC098934.2						nan	nan	nan	nan	nan	nan	nan	nan	nan	nan	nan	nan	nan	nan	nan	nan	nan	nan	nan	nan
ASH1L-AS1	645676	symbol	H. sapiens	645676	H. sapiens	0.0	0.0	0.0	0.0	0.0	0.0	0.0	0.0	0.0	0.0	0.0	0.0	0.0	0.0	0.0	0.0	0.0	0.0	0.0	0.0
MORC2-AS1	150291	symbol	H. sapiens	150291	H. sapiens	0.0	0.0	0.0	0.0	0.0	0.0	0.0	0.0	0.0	0.0	0.0	0.0	0.0	0.0	0.0	0.0	0.0	0.0	0.0	0.0
AL669831.5						nan	nan	nan	nan	nan	nan	nan	nan	nan	nan	nan	nan	nan	nan	nan	nan	nan	nan	nan	nan
AC010980.1						nan	nan	nan	nan	nan	nan	nan	nan	nan	nan	nan	nan	nan	nan	nan	nan	nan	nan	nan	nan
PAXBP1-AS1	100506215	symbol	H. sapiens	100506215	H. sapiens	0.0	0.0	0.0	0.0	0.0	0.0	0.0	0.0	0.0	0.0	0.0	0.0	0.0	0.0	0.0	0.0	0.0	0.0	0.0	0.0
ADSL	158	symbol	H. sapiens	158	H. sapiens	0.0	0.0	0.0	1.0	0.0	0.0	0.0	0.0	0.0	0.0	0.0	0.0	0.0	0.0	0.0	0.0	0.0	0.0	0.0	0.0
ARHGEF25	115557	symbol	H. sapiens	115557	H. sapiens	0.0	0.0	0.0	0.0	0.0	0.0	0.0	0.0	0.0	0.0	0.0	0.0	0.0	0.0	0.0	0.0	0.0	0.0	0.0	0.0
TMEM189	387521	symbol	H. sapiens	387521	H. sapiens	0.0	0.0	0.0	0.0	0.0	0.0	0.0	0.0	0.0	0.0	0.0	0.0	0.0	0.0	0.0	0.0	0.0	0.0	0.0	0.0
AMACR	23600	symbol	H. sapiens	23600	H. sapiens	0.0	0.0	0.0	1.0	0.0	0.0	0.0	0.0	0.0	1.0	0.0	0.0	0.0	0.0	0.0	0.0	0.0	0.0	1.0	0.0
ARFGAP3	26286	symbol	H. sapiens	26286	H. sapiens	0.0	0.0	0.0	0.0	0.0	1.0	1.0	0.0	0.0	0.0	0.0	0.0	0.0	0.0	0.0	0.0	0.0	0.0	0.0	0.0
PPAN-P2RY11	692312	symbol	H. sapiens	692312	H. sapiens	0.0	0.0	0.0	0.0	0.0	0.0	0.0	0.0	0.0	0.0	0.0	0.0	0.0	0.0	0.0	0.0	0.0	0.0	0.0	0.0
UPK3B	105375355	symbol	H. sapiens	105375355	H. sapiens	0.0	0.0	0.0	0.0	0.0	0.0	0.0	0.0	0.0	0.0	0.0	0.0	0.0	0.0	0.0	0.0	0.0	0.0	0.0	0.0
NFS1	9054	symbol	H. sapiens	9054	H. sapiens	0.0	0.0	0.0	1.0	0.0	0.0	0.0	0.0	0.0	0.0	0.0	0.0	1.0	0.0	0.0	0.0	0.0	0.0	0.0	0.0
CDK11B	984	symbol	H. sapiens	984	H. sapiens	0.0	0.0	0.0	0.0	0.0	0.0	0.0	1.0	1.0	0.0	0.0	0.0	0.0	0.0	0.0	0.0	0.0	0.0	0.0	0.0
LINC00504	201853	symbol	H. sapiens	201853	H. sapiens	0.0	0.0	0.0	0.0	0.0	0.0	0.0	0.0	0.0	0.0	0.0	0.0	0.0	0.0	0.0	0.0	0.0	0.0	0.0	0.0
HAUS5	23354	symbol	H. sapiens	23354	H. sapiens	0.0	0.0	1.0	0.0	1.0	1.0	0.0	0.0	0.0	0.0	0.0	1.0	0.0	0.0	0.0	0.0	0.0	0.0	0.0	0.0
LINC01016	100507584	symbol	H. sapiens	100507584	H. sapiens	0.0	0.0	0.0	0.0	0.0	0.0	0.0	0.0	0.0	0.0	0.0	0.0	0.0	0.0	0.0	0.0	0.0	0.0	0.0	0.0
ZNF345	25850	symbol	H. sapiens	25850	H. sapiens	0.0	0.0	0.0	0.0	0.0	0.0	0.0	0.0	0.0	0.0	0.0	0.0	0.0	0.0	0.0	0.0	0.0	0.0	0.0	0.0
LINC02475	100506827	symbol	H. sapiens	100506827	H. sapiens	0.0	0.0	0.0	0.0	0.0	0.0	0.0	0.0	0.0	0.0	0.0	0.0	0.0	0.0	0.0	0.0	0.0	0.0	0.0	0.0
PCDHA12	56137	symbol	H. sapiens	56137	H. sapiens	0.0	0.0	0.0	0.0	0.0	0.0	0.0	0.0	0.0	0.0	0.0	0.0	0.0	0.0	0.0	0.0	0.0	0.0	0.0	0.0
FAM86EP	348926	symbol	H. sapiens	348926	H. sapiens	0.0	0.0	0.0	0.0	0.0	0.0	0.0	0.0	0.0	0.0	0.0	0.0	0.0	0.0	0.0	0.0	0.0	0.0	0.0	0.0
HOXA10	3206	symbol	H. sapiens	3206	H. sapiens	0.0	0.0	0.0	0.0	0.0	0.0	0.0	0.0	0.0	0.0	0.0	0.0	0.0	0.0	0.0	0.0	0.0	0.0	0.0	0.0
TUG1	55000	symbol	H. sapiens	55000	H. sapiens	0.0	0.0	0.0	0.0	0.0	0.0	0.0	1.0	0.0	0.0	0.0	0.0	0.0	0.0	0.0	0.0	0.0	0.0	0.0	0.0
PCDHA3	56145	symbol	H. sapiens	56145	H. sapiens	0.0	0.0	0.0	0.0	0.0	0.0	0.0	0.0	0.0	0.0	0.0	0.0	0.0	0.0	0.0	0.0	0.0	0.0	0.0	0.0
HMBS	3145	symbol	H. sapiens	3145	H. sapiens	0.0	0.0	0.0	1.0	0.0	0.0	0.0	0.0	0.0	0.0	0.0	0.0	0.0	0.0	0.0	0.0	0.0	0.0	0.0	0.0
CNPY2	10330	symbol	H. sapiens	10330	H. sapiens	0.0	0.0	0.0	0.0	0.0	0.0	0.0	0.0	0.0	0.0	0.0	0.0	0.0	0.0	0.0	0.0	0.0	0.0	0.0	0.0
CEP95	90799	symbol	H. sapiens	90799	H. sapiens	0.0	0.0	0.0	0.0	0.0	0.0	0.0	0.0	0.0	0.0	0.0	0.0	0.0	0.0	0.0	0.0	0.0	0.0	0.0	0.0
USP3-AS1	100130855	symbol	H. sapiens	100130855	H. sapiens	0.0	0.0	0.0	0.0	0.0	0.0	0.0	0.0	0.0	0.0	0.0	0.0	0.0	0.0	0.0	0.0	0.0	0.0	0.0	0.0
THTPA	79178	symbol	H. sapiens	79178	H. sapiens	0.0	0.0	0.0	1.0	0.0	0.0	0.0	0.0	0.0	0.0	0.0	0.0	1.0	0.0	0.0	0.0	0.0	0.0	0.0	0.0
ERVK13-1	100507321	symbol	H. sapiens	100507321	H. sapiens	0.0	0.0	0.0	0.0	0.0	0.0	0.0	0.0	0.0	0.0	0.0	0.0	0.0	0.0	0.0	0.0	0.0	0.0	0.0	0.0
LINC00667	339290	symbol	H. sapiens	339290	H. sapiens	0.0	0.0	0.0	0.0	0.0	0.0	0.0	0.0	0.0	0.0	0.0	0.0	0.0	0.0	0.0	0.0	0.0	0.0	0.0	0.0
NBPF11	200030	symbol	H. sapiens	200030	H. sapiens	0.0	0.0	0.0	0.0	0.0	0.0	0.0	0.0	0.0	0.0	0.0	0.0	0.0	0.0	0.0	0.0	0.0	0.0	0.0	0.0
TSPOAP1-AS1	100506779	symbol	H. sapiens	100506779	H. sapiens	0.0	0.0	0.0	0.0	0.0	0.0	0.0	0.0	0.0	0.0	0.0	0.0	0.0	0.0	0.0	0.0	0.0	0.0	0.0	0.0
AC018413.1						nan	nan	nan	nan	nan	nan	nan	nan	nan	nan	nan	nan	nan	nan	nan	nan	nan	nan	nan	nan
MAP3K14-AS1	100133991	symbol	H. sapiens	100133991	H. sapiens	0.0	0.0	0.0	0.0	0.0	0.0	0.0	0.0	0.0	0.0	0.0	0.0	0.0	0.0	0.0	0.0	0.0	0.0	0.0	0.0
AC009005.1						nan	nan	nan	nan	nan	nan	nan	nan	nan	nan	nan	nan	nan	nan	nan	nan	nan	nan	nan	nan
IKBKG	8517	symbol	H. sapiens	8517	H. sapiens	0.0	0.0	0.0	0.0	0.0	1.0	0.0	1.0	0.0	0.0	0.0	0.0	0.0	0.0	0.0	0.0	1.0	0.0	0.0	0.0
NBPF9	400818	symbol	H. sapiens	400818	H. sapiens	0.0	0.0	0.0	0.0	0.0	0.0	0.0	0.0	0.0	0.0	0.0	0.0	0.0	0.0	0.0	0.0	0.0	0.0	0.0	0.0
IPO5P1	100132815	symbol	H. sapiens	100132815	H. sapiens	0.0	0.0	0.0	0.0	0.0	0.0	0.0	0.0	0.0	0.0	0.0	0.0	0.0	0.0	0.0	0.0	0.0	0.0	0.0	0.0
KMT2B	9757	symbol	H. sapiens	9757	H. sapiens	0.0	1.0	0.0	0.0	0.0	0.0	0.0	0.0	0.0	0.0	0.0	0.0	0.0	0.0	0.0	0.0	0.0	0.0	0.0	0.0
FAM47E-STBD1	100631383	symbol	H. sapiens	100631383	H. sapiens	0.0	0.0	0.0	0.0	0.0	0.0	0.0	0.0	0.0	0.0	0.0	0.0	0.0	0.0	0.0	0.0	0.0	0.0	0.0	0.0
DCP1A	55802	symbol	H. sapiens	55802	H. sapiens	0.0	0.0	0.0	1.0	0.0	0.0	0.0	1.0	0.0	0.0	0.0	0.0	0.0	0.0	0.0	0.0	0.0	0.0	0.0	0.0
ZNHIT3	9326	symbol	H. sapiens	9326	H. sapiens	1.0	0.0	0.0	0.0	0.0	0.0	0.0	0.0	1.0	0.0	0.0	0.0	0.0	0.0	0.0	0.0	0.0	0.0	0.0	0.0
NOL12	79159	symbol	H. sapiens	79159	H. sapiens	0.0	0.0	0.0	0.0	0.0	0.0	0.0	0.0	0.0	0.0	0.0	0.0	0.0	0.0	0.0	0.0	0.0	0.0	0.0	0.0
PPP4R3B	57223	symbol	H. sapiens	57223	H. sapiens	0.0	0.0	0.0	1.0	0.0	0.0	0.0	1.0	0.0	0.0	0.0	0.0	0.0	0.0	0.0	0.0	0.0	0.0	0.0	0.0
MYO19	80179	symbol	H. sapiens	80179	H. sapiens	0.0	0.0	0.0	0.0	1.0	1.0	0.0	0.0	0.0	0.0	0.0	0.0	0.0	0.0	0.0	0.0	0.0	1.0	1.0	0.0
ZNF229	7772	symbol	H. sapiens	7772	H. sapiens	0.0	0.0	0.0	0.0	0.0	0.0	0.0	0.0	0.0	0.0	0.0	0.0	0.0	0.0	0.0	0.0	0.0	0.0	0.0	0.0
AC241585.3						nan	nan	nan	nan	nan	nan	nan	nan	nan	nan	nan	nan	nan	nan	nan	nan	nan	nan	nan	nan
EBLN3P	100506710	symbol	H. sapiens	100506710	H. sapiens	0.0	0.0	0.0	0.0	0.0	0.0	0.0	0.0	0.0	0.0	0.0	0.0	0.0	0.0	0.0	0.0	0.0	0.0	0.0	0.0

## Sheet: Enrichment
GroupID	Category	Term	Description	LogP	Log(q-value)	InTerm_InList	Genes	Symbols
1_Summary	GO Biological Processes	GO:0034470	ncRNA processing	-7.16734	-3.22748	48/384	4931,6203,6894,8575,8945,9092,9097,9326,9692,9836,10360,10438,10978,11103,23517,25821,26512,27340,50628,51202,51605,54512,54973,55164,55178,55636,55644,55651,55656,55695,57062,57505,57647,64118,64963,79954,80745,84135,84705,91801,129450,130916,134430,158234,203522,260294,283989,285381,905,1022,1615,2058,2193,4603,4790,5188,5431,6878,8178,9555,10352,124454,636,5562,6606,6635,7375,8487,8665,9733,10…	NVL,RPS9,TARBP1,PRKRA,BTRC,SART1,USP14,ZNHIT3,PRORP,LCMT2,NPM3,C1D,CLP1,KRR1,MTREX,MTO1,INTS6,UTP20,GEMIN4,DDX47,TRMT6,EXOSC4,INTS11,SHQ1,MRM3,CHD7,OSGEP,NHP2,INTS8,NSUN5,DDX24,AARS2,DHX37,DUS1L,MRPS11,NOL10,THUMPD2,UTP15,GTPBP3,ALKBH8,TYW5,MTERF4,WDR36,TRMT10B,INTS6L,NSUN5P2,TSEN54,DPH3,CCNT2,CDK7,DARS1,EPRS,FARSA,MYBL1,NFKB1,GATB,POLR2B,TAF6,ELL,MACROH2A1,WARS2,EARS2,BICD1,PRKAA1,SMN1,SNRPE,USP…
1_Member	GO Biological Processes	GO:0034470	ncRNA processing	-7.16734	-3.22748	48/384	4931,6203,6894,8575,8945,9092,9097,9326,9692,9836,10360,10438,10978,11103,23517,25821,26512,27340,50628,51202,51605,54512,54973,55164,55178,55636,55644,55651,55656,55695,57062,57505,57647,64118,64963,79954,80745,84135,84705,91801,129450,130916,134430,158234,203522,260294,283989,285381	NVL,RPS9,TARBP1,PRKRA,BTRC,SART1,USP14,ZNHIT3,PRORP,LCMT2,NPM3,C1D,CLP1,KRR1,MTREX,MTO1,INTS6,UTP20,GEMIN4,DDX47,TRMT6,EXOSC4,INTS11,SHQ1,MRM3,CHD7,OSGEP,NHP2,INTS8,NSUN5,DDX24,AARS2,DHX37,DUS1L,MRPS11,NOL10,THUMPD2,UTP15,GTPBP3,ALKBH8,TYW5,MTERF4,WDR36,TRMT10B,INTS6L,NSUN5P2,TSEN54,DPH3
1_Member	GO Biological Processes	GO:0034660	ncRNA metabolic process	-6.98426	-3.22748	62/563	905,1022,1615,2058,2193,4603,4790,4931,5188,5431,6203,6878,6894,8178,8575,8945,9092,9097,9326,9555,9692,9836,10352,10360,10438,10978,11103,23517,25821,26512,27340,50628,51202,51605,54512,54973,55164,55178,55636,55644,55651,55656,55695,57062,57505,57647,64118,64963,79954,80745,84135,84705,91801,124454,129450,130916,134430,158234,203522,260294,283989,285381	CCNT2,CDK7,DARS1,EPRS,FARSA,MYBL1,NFKB1,NVL,GATB,POLR2B,RPS9,TAF6,TARBP1,ELL,PRKRA,BTRC,SART1,USP14,ZNHIT3,MACROH2A1,PRORP,LCMT2,WARS2,NPM3,C1D,CLP1,KRR1,MTREX,MTO1,INTS6,UTP20,GEMIN4,DDX47,TRMT6,EXOSC4,INTS11,SHQ1,MRM3,CHD7,OSGEP,NHP2,INTS8,NSUN5,DDX24,AARS2,DHX37,DUS1L,MRPS11,NOL10,THUMPD2,UTP15,GTPBP3,ALKBH8,EARS2,TYW5,MTERF4,WDR36,TRMT10B,INTS6L,NSUN5P2,TSEN54,DPH3
2_Summary	GO Biological Processes	GO:0043414	macromolecule methylation	-6.91875	-3.22748	41/309	672,1789,2122,3275,4297,5252,6419,6894,7468,8731,9555,9692,9757,9836,10196,10782,22823,25821,28989,30827,51605,51742,54496,54904,55178,55251,55695,79609,79977,80745,83852,84705,91801,94104,115294,130916,151194,158234,254013,260294,751071,10400,64745,133383,604,817,1111,3066,3299,5562,5595,6045,6421,7319,7324,9474,9575,9733,9960,10856,23133,23309,25865,27005,51366,56848,79829,79885,80853,114803,15…	BRCA1,DNMT3B,MECOM,PRMT2,KMT2A,PHF1,SETMAR,TARBP1,NSD2,RNMT,MACROH2A1,PRORP,KMT2B,LCMT2,PRMT3,ZNF274,MTF2,MTO1,NTMT1,CXXC1,TRMT6,ARID4B,PRMT7,NSD3,MRM3,PCMTD2,NSUN5,VCPKMT,GRHL2,THUMPD2,SETDB2,GTPBP3,ALKBH8,PAXBP1,PCMTD1,MTERF4,METTL21A,TRMT10B,ETFBKMT,NSUN5P2,CSKMT,PEMT,METTL17,SETD9,BCL6,CAMK2D,CHEK1,HDAC2,HSF4,PRKAA1,MAPK3,RNF2,SFPQ,UBE2A,UBE2E1,ATG5,CLOCK,SART3,USP3,RUVBL2,PHF8,SIN3B,PRKD2,US…
2_Member	GO Biological Processes	GO:0043414	macromolecule methylation	-6.91875	-3.22748	41/309	672,1789,2122,3275,4297,5252,6419,6894,7468,8731,9555,9692,9757,9836,10196,10782,22823,25821,28989,30827,51605,51742,54496,54904,55178,55251,55695,79609,79977,80745,83852,84705,91801,94104,115294,130916,151194,158234,254013,260294,751071	BRCA1,DNMT3B,MECOM,PRMT2,KMT2A,PHF1,SETMAR,TARBP1,NSD2,RNMT,MACROH2A1,PRORP,KMT2B,LCMT2,PRMT3,ZNF274,MTF2,MTO1,NTMT1,CXXC1,TRMT6,ARID4B,PRMT7,NSD3,MRM3,PCMTD2,NSUN5,VCPKMT,GRHL2,THUMPD2,SETDB2,GTPBP3,ALKBH8,PAXBP1,PCMTD1,MTERF4,METTL21A,TRMT10B,ETFBKMT,NSUN5P2,CSKMT
3_Summary	GO Biological Processes	GO:0097711	ciliary basal body-plasma membrane docking	-6.82599	-3.22748	20/95	1453,5108,8481,8636,9738,9814,22995,23354,26005,26123,51134,54806,54820,55125,57787,79598,80184,84902,132320,261734,8675,10497,11311,64598,65009,3911,4134,4750,9474,9786,23216,25886,26140,27352,28981,29105,54662,54874,55212,55764,57560,83547,83874,90410,116840,138639,153241,282809,2059,4690,5217,5756,9788,9842,23242,26999,51765,54828,54849,54869,196527	CSNK1D,PCM1,OFD1,SSNA1,CCP110,SFI1,CEP152,HAUS5,C2CD3,TCTN3,CEP83,AHI1,NDE1,CEP192,MARK4,CEP97,CEP290,CEP89,SCLT1,NPHP4,STX16,UNC13B,VPS45,MOSPD3,NDRG4,LAMA5,MAP4,NEK1,ATG5,KIAA0586,TBC1D1,POC1A,TTLL3,SGSM3,IFT81,CFAP20,TBC1D13,FNBP1L,BBS7,IFT122,IFT80,RILP,TBC1D10A,IFT20,CNTROB,PTPDC1,CEP120,POC1B,EPS8,NCK1,PFN2,TWF1,MTSS1,PLEKHM1,COBL,CYFIP2,STK26,BCAS3,DEF8,EPS8L1,ANO6
3_Member	GO Biological Processes	GO:0097711	ciliary basal body-plasma membrane docking	-6.82599	-3.22748	20/95	1453,5108,8481,8636,9738,9814,22995,23354,26005,26123,51134,54806,54820,55125,57787,79598,80184,84902,132320,261734	CSNK1D,PCM1,OFD1,SSNA1,CCP110,SFI1,CEP152,HAUS5,C2CD3,TCTN3,CEP83,AHI1,NDE1,CEP192,MARK4,CEP97,CEP290,CEP89,SCLT1,NPHP4
4_Summary	GO Biological Processes	GO:0006732	coenzyme metabolic process	-6.46711	-2.9655	48/405	686,2232,2618,2820,2954,3417,3607,4522,5092,5208,5209,5562,5860,6396,6470,6573,6888,8021,8514,8564,8604,8803,9054,9374,10005,10400,10762,10768,11277,11319,23382,51144,53371,55066,55276,56922,64080,64087,64834,79023,79178,80347,81929,83594,83666,133686,339123,441024,111,158,204,272,353,498,516,572,4706,4707,4714,4718,4832,5141,5142,5634,6240,6389,6817,7371,8505,8930,10059,23479,25996,29789,51103,5…	BTD,FDXR,GART,GPD2,GSTZ1,IDH1,FOXK2,MTHFD1,PCBD1,PFKFB2,PFKFB3,PRKAA1,QDPR,SEC13,SHMT1,SLC19A1,TALDO1,NUP214,KCNAB2,KMO,SLC25A12,SUCLA2,NFS1,PPT2,ACOT8,PEMT,NUP50,AHCYL1,TREX1,ECD,AHCYL2,HSD17B12,NUP54,PDPR,PGM2,MCCC1,RBKS,MCCC2,ELOVL1,NUP37,THTPA,COASY,SEH1L,NUDT12,PARP9,NADK2,JMJD8,MTHFD2L,ADCY5,ADSL,AK2,AMPD3,APRT,ATP5F1A,ATP5MC1,BAD,NDUFAB1,NDUFB1,NDUFB8,NDUFC2,NME3,PDE4A,PDE4B,PRPS2,RRM1,SDH…
4_Member	GO Biological Processes	GO:0006732	coenzyme metabolic process	-6.46711	-2.9655	48/405	686,2232,2618,2820,2954,3417,3607,4522,5092,5208,5209,5562,5860,6396,6470,6573,6888,8021,8514,8564,8604,8803,9054,9374,10005,10400,10762,10768,11277,11319,23382,51144,53371,55066,55276,56922,64080,64087,64834,79023,79178,80347,81929,83594,83666,133686,339123,441024	BTD,FDXR,GART,GPD2,GSTZ1,IDH1,FOXK2,MTHFD1,PCBD1,PFKFB2,PFKFB3,PRKAA1,QDPR,SEC13,SHMT1,SLC19A1,TALDO1,NUP214,KCNAB2,KMO,SLC25A12,SUCLA2,NFS1,PPT2,ACOT8,PEMT,NUP50,AHCYL1,TREX1,ECD,AHCYL2,HSD17B12,NUP54,PDPR,PGM2,MCCC1,RBKS,MCCC2,ELOVL1,NUP37,THTPA,COASY,SEH1L,NUDT12,PARP9,NADK2,JMJD8,MTHFD2L
2_Member	GO Biological Processes	GO:0032259	methylation	-6.15181	-2.75675	44/366	672,1789,2122,3275,4297,5252,6419,6894,7468,8731,9555,9692,9757,9836,10196,10400,10782,22823,25821,28989,30827,51605,51742,54496,54904,55178,55251,55695,64745,79609,79977,80745,83852,84705,91801,94104,115294,130916,133383,151194,158234,254013,260294,751071	BRCA1,DNMT3B,MECOM,PRMT2,KMT2A,PHF1,SETMAR,TARBP1,NSD2,RNMT,MACROH2A1,PRORP,KMT2B,LCMT2,PRMT3,PEMT,ZNF274,MTF2,MTO1,NTMT1,CXXC1,TRMT6,ARID4B,PRMT7,NSD3,MRM3,PCMTD2,NSUN5,METTL17,VCPKMT,GRHL2,THUMPD2,SETDB2,GTPBP3,ALKBH8,PAXBP1,PCMTD1,MTERF4,SETD9,METTL21A,TRMT10B,ETFBKMT,NSUN5P2,CSKMT
4_Member	GO Biological Processes	GO:0006753	nucleoside phosphate metabolic process	-6.11222	-2.75675	71/717	111,158,204,272,353,498,516,572,2618,2820,2954,3417,3607,4522,4706,4707,4714,4718,4832,5141,5142,5208,5209,5562,5634,6240,6389,6396,6470,6817,6888,7371,8021,8505,8514,8564,8604,8803,8930,9054,9374,10005,10059,10762,11277,11319,23479,25996,29789,51103,51144,53371,55066,55276,56848,64077,64080,64087,64834,79023,79621,79736,80347,81929,83594,83666,132001,133686,197258,339123,441024	ADCY5,ADSL,AK2,AMPD3,APRT,ATP5F1A,ATP5MC1,BAD,GART,GPD2,GSTZ1,IDH1,FOXK2,MTHFD1,NDUFAB1,NDUFB1,NDUFB8,NDUFC2,NME3,PDE4A,PDE4B,PFKFB2,PFKFB3,PRKAA1,PRPS2,RRM1,SDHA,SEC13,SHMT1,SULT1A1,TALDO1,UCK2,NUP214,PARG,KCNAB2,KMO,SLC25A12,SUCLA2,MBD4,NFS1,PPT2,ACOT8,DNM1L,NUP50,TREX1,ECD,ISCU,REXO2,OLA1,NDUFAF1,HSD17B12,NUP54,PDPR,PGM2,SPHK2,LHPP,RBKS,MCCC2,ELOVL1,NUP37,RNASEH2B,TEFM,COASY,SEH1L,NUDT12,PARP9…
4_Member	GO Biological Processes	GO:0009117	nucleotide metabolic process	-5.96582	-2.70754	70/710	111,158,204,272,353,498,516,572,2618,2820,2954,3417,3607,4522,4706,4707,4714,4718,4832,5141,5142,5208,5209,5562,5634,6240,6389,6396,6470,6817,6888,7371,8021,8505,8514,8564,8604,8803,8930,9054,9374,10005,10059,10762,11277,11319,23479,25996,29789,51103,51144,53371,55066,55276,56848,64080,64087,64834,79023,79621,79736,80347,81929,83594,83666,132001,133686,197258,339123,441024	ADCY5,ADSL,AK2,AMPD3,APRT,ATP5F1A,ATP5MC1,BAD,GART,GPD2,GSTZ1,IDH1,FOXK2,MTHFD1,NDUFAB1,NDUFB1,NDUFB8,NDUFC2,NME3,PDE4A,PDE4B,PFKFB2,PFKFB3,PRKAA1,PRPS2,RRM1,SDHA,SEC13,SHMT1,SULT1A1,TALDO1,UCK2,NUP214,PARG,KCNAB2,KMO,SLC25A12,SUCLA2,MBD4,NFS1,PPT2,ACOT8,DNM1L,NUP50,TREX1,ECD,ISCU,REXO2,OLA1,NDUFAF1,HSD17B12,NUP54,PDPR,PGM2,SPHK2,RBKS,MCCC2,ELOVL1,NUP37,RNASEH2B,TEFM,COASY,SEH1L,NUDT12,PARP9,TAMM…
4_Member	GO Biological Processes	GO:0051186	cofactor metabolic process	-5.92641	-2.70754	62/604	686,1371,1535,2232,2235,2618,2730,2820,2878,2879,2948,2954,3145,3417,3607,4363,4522,5092,5208,5209,5562,5860,6396,6470,6573,6888,8021,8514,8564,8604,8803,9054,9374,10005,10400,10762,10768,11277,11319,23382,23474,23479,27158,51144,51293,51629,53371,55066,55276,56922,64080,64087,64834,79023,79178,80347,81929,83594,83666,133686,339123,441024	BTD,CPOX,CYBA,FDXR,FECH,GART,GCLM,GPD2,GPX3,GPX4,GSTM4,GSTZ1,HMBS,IDH1,FOXK2,ABCC1,MTHFD1,PCBD1,PFKFB2,PFKFB3,PRKAA1,QDPR,SEC13,SHMT1,SLC19A1,TALDO1,NUP214,KCNAB2,KMO,SLC25A12,SUCLA2,NFS1,PPT2,ACOT8,PEMT,NUP50,AHCYL1,TREX1,ECD,AHCYL2,ETHE1,ISCU,NDOR1,HSD17B12,CD320,SLC25A39,NUP54,PDPR,PGM2,MCCC1,RBKS,MCCC2,ELOVL1,NUP37,THTPA,COASY,SEH1L,NUDT12,PARP9,NADK2,JMJD8,MTHFD2L
4_Member	GO Biological Processes	GO:0090407	organophosphate biosynthetic process	-5.90812	-2.70754	69/699	111,158,204,272,353,498,516,2618,2954,3417,3607,3631,4522,4832,5130,5208,5209,5289,5298,5562,5634,6240,6396,6470,7371,8021,8564,8604,8904,9054,9374,9453,9487,9791,10026,10390,10400,10762,11277,11319,23556,27440,51144,51205,51447,51604,53371,54872,55066,56848,56910,64077,64419,64834,65258,66036,79023,79947,80347,81579,81929,83594,83666,132001,133686,197258,339123,376497,441024	ADCY5,ADSL,AK2,AMPD3,APRT,ATP5F1A,ATP5MC1,GART,GSTZ1,IDH1,FOXK2,INPP4A,MTHFD1,NME3,PCYT1A,PFKFB2,PFKFB3,PIK3C3,PI4KB,PRKAA1,PRPS2,RRM1,SEC13,SHMT1,UCK2,NUP214,KMO,SLC25A12,CPNE1,NFS1,PPT2,GGPS1,PIGL,PTDSS1,PIGK,CEPT1,PEMT,NUP50,TREX1,ECD,PIGN,HDHD5,HSD17B12,ACP6,IP6K2,PIGT,NUP54,PIGG,PDPR,SPHK2,STARD7,LHPP,MTMR14,ELOVL1,MPPE1,MTMR9,NUP37,DHDDS,COASY,PLA2G12A,SEH1L,NUDT12,PARP9,TAMM41,NADK2,FCSK,J…
5_Summary	GO Biological Processes	GO:0010564	regulation of cell cycle process	-5.46944	-2.31025	74/789	596,604,672,835,898,995,1019,1031,1111,1453,1876,1950,1981,2627,3275,4085,5108,5289,5371,5569,5699,5706,5708,5711,5715,5719,6045,6347,6419,6421,6491,7039,7161,7321,7324,7709,8481,8636,8738,8945,9088,9555,9738,9814,10197,10213,10274,10783,10795,10869,10926,11319,22995,23198,23269,23354,25886,25904,26973,51347,51441,54820,54908,55125,55512,56155,57787,79598,79621,80179,80184,90293,146691,153241,102…	BCL2,BCL6,BRCA1,CASP2,CCNE1,CDC25C,CDK4,CDKN2C,CHEK1,CSNK1D,E2F6,EGF,EIF4G1,GATA6,PRMT2,MAD2L1,PCM1,PIK3C3,PML,PKIA,PSMB10,PSMC6,PSMD2,PSMD5,PSMD9,PSMD13,RNF2,CCL2,SETMAR,SFPQ,STIL,TGFA,TP73,UBE2D1,UBE2E1,ZBTB17,OFD1,SSNA1,CRADD,BTRC,PKMYT1,MACROH2A1,CCP110,SFI1,PSME3,PSMD14,STAG1,NEK6,ZNF268,USP19,DBF4,ECD,CEP152,PSME4,MGA,HAUS5,POC1A,CNOT10,CHORDC1,TAOK3,YTHDF2,NDE1,SPDL1,CEP192,SMPD3,TEX14,MAR…
5_Member	GO Biological Processes	GO:0010564	regulation of cell cycle process	-5.46944	-2.31025	74/789	596,604,672,835,898,995,1019,1031,1111,1453,1876,1950,1981,2627,3275,4085,5108,5289,5371,5569,5699,5706,5708,5711,5715,5719,6045,6347,6419,6421,6491,7039,7161,7321,7324,7709,8481,8636,8738,8945,9088,9555,9738,9814,10197,10213,10274,10783,10795,10869,10926,11319,22995,23198,23269,23354,25886,25904,26973,51347,51441,54820,54908,55125,55512,56155,57787,79598,79621,80179,80184,90293,146691,153241	BCL2,BCL6,BRCA1,CASP2,CCNE1,CDC25C,CDK4,CDKN2C,CHEK1,CSNK1D,E2F6,EGF,EIF4G1,GATA6,PRMT2,MAD2L1,PCM1,PIK3C3,PML,PKIA,PSMB10,PSMC6,PSMD2,PSMD5,PSMD9,PSMD13,RNF2,CCL2,SETMAR,SFPQ,STIL,TGFA,TP73,UBE2D1,UBE2E1,ZBTB17,OFD1,SSNA1,CRADD,BTRC,PKMYT1,MACROH2A1,CCP110,SFI1,PSME3,PSMD14,STAG1,NEK6,ZNF268,USP19,DBF4,ECD,CEP152,PSME4,MGA,HAUS5,POC1A,CNOT10,CHORDC1,TAOK3,YTHDF2,NDE1,SPDL1,CEP192,SMPD3,TEX14,MAR…
2_Member	GO Biological Processes	GO:0006479	protein methylation	-5.34138	-2.25474	26/179	672,1789,2122,3275,4297,5252,6419,7468,9555,9757,10196,10782,22823,28989,30827,51742,54496,54904,55251,79609,83852,94104,115294,151194,254013,751071	BRCA1,DNMT3B,MECOM,PRMT2,KMT2A,PHF1,SETMAR,NSD2,MACROH2A1,KMT2B,PRMT3,ZNF274,MTF2,NTMT1,CXXC1,ARID4B,PRMT7,NSD3,PCMTD2,VCPKMT,SETDB2,PAXBP1,PCMTD1,METTL21A,ETFBKMT,CSKMT
2_Member	GO Biological Processes	GO:0008213	protein alkylation	-5.34138	-2.25474	26/179	672,1789,2122,3275,4297,5252,6419,7468,9555,9757,10196,10782,22823,28989,30827,51742,54496,54904,55251,79609,83852,94104,115294,151194,254013,751071	BRCA1,DNMT3B,MECOM,PRMT2,KMT2A,PHF1,SETMAR,NSD2,MACROH2A1,KMT2B,PRMT3,ZNF274,MTF2,NTMT1,CXXC1,ARID4B,PRMT7,NSD3,PCMTD2,VCPKMT,SETDB2,PAXBP1,PCMTD1,METTL21A,ETFBKMT,CSKMT
3_Member	GO Biological Processes	GO:0140056	organelle localization by membrane tethering	-5.30431	-2.24987	25/169	1453,5108,8481,8636,8675,9738,9814,10497,11311,22995,23354,26005,26123,51134,54806,54820,55125,57787,64598,65009,79598,80184,84902,132320,261734	CSNK1D,PCM1,OFD1,SSNA1,STX16,CCP110,SFI1,UNC13B,VPS45,CEP152,HAUS5,C2CD3,TCTN3,CEP83,AHI1,NDE1,CEP192,MARK4,MOSPD3,NDRG4,CEP97,CEP290,CEP89,SCLT1,NPHP4
6_Summary	GO Biological Processes	GO:0051640	organelle localization	-5.17623	-2.17857	67/706	135,372,636,1058,1453,2011,3566,4085,4134,5108,5170,5189,5217,5590,5873,6396,7039,8481,8517,8546,8636,8675,8723,8773,9527,9738,9814,9842,9871,9927,10059,10497,11311,22995,23095,23354,26005,26123,26286,51134,51760,54806,54820,54849,54874,54908,55125,55212,55291,56288,56848,57787,64598,65009,79083,79598,80179,80184,81929,84062,84902,90410,132320,140730,153241,201294,261734,596,1742,3257,5289,5584,6…	ADORA2A,ARCN1,BICD1,CENPA,CSNK1D,MARK2,IL4R,MAD2L1,MAP4,PCM1,PDPK1,PEX1,PFN2,PRKCZ,RAB27A,SEC13,TGFA,OFD1,IKBKG,AP3B1,SSNA1,STX16,SNX4,SNAP23,GOSR1,CCP110,SFI1,PLEKHM1,SEC24D,MFN2,DNM1L,UNC13B,VPS45,CEP152,KIF1B,HAUS5,C2CD3,TCTN3,ARFGAP3,CEP83,SYT17,AHI1,NDE1,DEF8,FNBP1L,SPDL1,CEP192,BBS7,PPP6R3,PARD3,SPHK2,MARK4,MOSPD3,NDRG4,MLPH,CEP97,MYO19,CEP290,SEH1L,DTNBP1,CEP89,IFT20,SCLT1,RIMS4,CEP120,UNC…
6_Member	GO Biological Processes	GO:0051640	organelle localization	-5.17623	-2.17857	67/706	135,372,636,1058,1453,2011,3566,4085,4134,5108,5170,5189,5217,5590,5873,6396,7039,8481,8517,8546,8636,8675,8723,8773,9527,9738,9814,9842,9871,9927,10059,10497,11311,22995,23095,23354,26005,26123,26286,51134,51760,54806,54820,54849,54874,54908,55125,55212,55291,56288,56848,57787,64598,65009,79083,79598,80179,80184,81929,84062,84902,90410,132320,140730,153241,201294,261734	ADORA2A,ARCN1,BICD1,CENPA,CSNK1D,MARK2,IL4R,MAD2L1,MAP4,PCM1,PDPK1,PEX1,PFN2,PRKCZ,RAB27A,SEC13,TGFA,OFD1,IKBKG,AP3B1,SSNA1,STX16,SNX4,SNAP23,GOSR1,CCP110,SFI1,PLEKHM1,SEC24D,MFN2,DNM1L,UNC13B,VPS45,CEP152,KIF1B,HAUS5,C2CD3,TCTN3,ARFGAP3,CEP83,SYT17,AHI1,NDE1,DEF8,FNBP1L,SPDL1,CEP192,BBS7,PPP6R3,PARD3,SPHK2,MARK4,MOSPD3,NDRG4,MLPH,CEP97,MYO19,CEP290,SEH1L,DTNBP1,CEP89,IFT20,SCLT1,RIMS4,CEP120,UNC…
4_Member	GO Biological Processes	GO:1901137	carbohydrate derivative biosynthetic process	-5.17503	-2.17857	72/776	111,158,204,272,353,498,516,596,1950,2583,2618,2954,3607,3955,4790,4832,5208,5209,5562,5634,6240,6396,6470,6934,7371,8021,8604,9374,9487,9526,9653,9836,10005,10026,10195,10585,10678,10762,11277,11319,23509,23556,29925,51144,51604,53371,54187,54872,55066,55512,56848,64788,64834,65258,79023,79152,79947,80347,81929,83548,84061,84750,84899,124583,129450,132789,135152,143888,160418,197258,339123,374378	ADCY5,ADSL,AK2,AMPD3,APRT,ATP5F1A,ATP5MC1,BCL2,EGF,B4GALNT1,GART,GSTZ1,FOXK2,LFNG,NFKB1,NME3,PFKFB2,PFKFB3,PRKAA1,PRPS2,RRM1,SEC13,SHMT1,TCF7L2,UCK2,NUP214,SLC25A12,PPT2,PIGL,MPDU1,HS2ST1,LCMT2,ACOT8,PIGK,ALG3,POMT1,B3GNT2,NUP50,TREX1,ECD,POFUT1,PIGN,GMPPB,HSD17B12,PIGT,NUP54,NANS,PIGG,PDPR,SMPD3,SPHK2,LMF1,ELOVL1,MPPE1,NUP37,FA2H,DHDDS,COASY,SEH1L,COG3,MAGT1,FUT10,TMTC4,CANT1,TYW5,GNPDA2,B3GAT2,…
4_Member	GO Biological Processes	GO:1901293	nucleoside phosphate biosynthetic process	-5.05285	-2.08272	43/390	111,158,204,272,353,498,516,2618,2954,3607,4522,4832,5208,5209,5562,5634,6240,6396,6470,7371,8021,8564,8604,9374,10762,11277,11319,51144,53371,55066,56848,64077,64834,79023,80347,81929,83594,83666,132001,133686,197258,339123,441024	ADCY5,ADSL,AK2,AMPD3,APRT,ATP5F1A,ATP5MC1,GART,GSTZ1,FOXK2,MTHFD1,NME3,PFKFB2,PFKFB3,PRKAA1,PRPS2,RRM1,SEC13,SHMT1,UCK2,NUP214,KMO,SLC25A12,PPT2,NUP50,TREX1,ECD,HSD17B12,NUP54,PDPR,SPHK2,LHPP,ELOVL1,NUP37,COASY,SEH1L,NUDT12,PARP9,TAMM41,NADK2,FCSK,JMJD8,MTHFD2L
7_Summary	GO Biological Processes	GO:0051345	positive regulation of hydrolase activity	-5.00092	-2.07034	71/771	141,355,572,663,842,1793,1856,2664,2889,3092,3987,4763,5170,5217,5371,5590,5595,5910,5998,6251,6300,6347,6419,6494,7168,7249,7341,7376,8717,8738,8837,9135,9610,9743,9905,10059,10126,10197,10213,10483,10762,23092,23151,23161,23198,23216,23232,23786,25782,25865,26286,26999,27018,27352,27429,51291,51306,54662,54828,55160,57706,64788,66036,81704,83874,93627,112399,131118,133522,255520,259173,604,5592…	ADPRH,FAS,BAD,BNIP2,CASP9,DOCK1,DVL2,GDI1,RAPGEF1,HIP1,LIMS1,NF1,PDPK1,PFN2,PML,PRKCZ,MAPK3,RAP1GDS1,RGS3,RSU1,MAPK12,CCL2,SETMAR,SIPA1,TPM1,TSC2,SUMO1,NR1H2,TRADD,CRADD,CFLAR,RABEP1,RIN1,ARHGAP32,SGSM2,DNM1L,DNAL4,PSME3,PSMD14,SEC23B,NUP50,ARHGAP26,GRAMD4,SNX13,PSME4,TBC1D1,TBC1D12,BCL2L13,RAB3GAP2,PRKD2,ARFGAP3,CYFIP2,BEX3,SGSM3,HTRA2,GMIP,FAM13B,TBC1D13,BCAS3,ARHGEF10L,DENND1A,LMF1,MTMR9,DOCK8…
7_Member	GO Biological Processes	GO:0051345	positive regulation of hydrolase activity	-5.00092	-2.07034	71/771	141,355,572,663,842,1793,1856,2664,2889,3092,3987,4763,5170,5217,5371,5590,5595,5910,5998,6251,6300,6347,6419,6494,7168,7249,7341,7376,8717,8738,8837,9135,9610,9743,9905,10059,10126,10197,10213,10483,10762,23092,23151,23161,23198,23216,23232,23786,25782,25865,26286,26999,27018,27352,27429,51291,51306,54662,54828,55160,57706,64788,66036,81704,83874,93627,112399,131118,133522,255520,259173	ADPRH,FAS,BAD,BNIP2,CASP9,DOCK1,DVL2,GDI1,RAPGEF1,HIP1,LIMS1,NF1,PDPK1,PFN2,PML,PRKCZ,MAPK3,RAP1GDS1,RGS3,RSU1,MAPK12,CCL2,SETMAR,SIPA1,TPM1,TSC2,SUMO1,NR1H2,TRADD,CRADD,CFLAR,RABEP1,RIN1,ARHGAP32,SGSM2,DNM1L,DNAL4,PSME3,PSMD14,SEC23B,NUP50,ARHGAP26,GRAMD4,SNX13,PSME4,TBC1D1,TBC1D12,BCL2L13,RAB3GAP2,PRKD2,ARFGAP3,CYFIP2,BEX3,SGSM3,HTRA2,GMIP,FAM13B,TBC1D13,BCAS3,ARHGEF10L,DENND1A,LMF1,MTMR9,DOCK8…
2_Member	GO Biological Processes	GO:0016570	histone modification	-4.99216	-2.07034	48/457	604,672,817,1111,1789,2122,3066,3275,3299,4297,5252,5562,5595,6045,6419,6421,7319,7324,7468,9474,9555,9575,9733,9757,9960,10196,10782,10856,22823,23133,23309,25865,27005,28989,30827,51366,51742,54496,54904,56848,79829,79885,80853,83852,94104,114803,151050,284058	BCL6,BRCA1,CAMK2D,CHEK1,DNMT3B,MECOM,HDAC2,PRMT2,HSF4,KMT2A,PHF1,PRKAA1,MAPK3,RNF2,SETMAR,SFPQ,UBE2A,UBE2E1,NSD2,ATG5,MACROH2A1,CLOCK,SART3,KMT2B,USP3,PRMT3,ZNF274,RUVBL2,MTF2,PHF8,SIN3B,PRKD2,USP21,NTMT1,CXXC1,UBR5,ARID4B,PRMT7,NSD3,SPHK2,NAA40,HDAC11,KDM7A,SETDB2,PAXBP1,MYSM1,KANSL1L,KANSL1
8_Summary	GO Biological Processes	GO:0002244	hematopoietic progenitor cell differentiation	-4.94574	-2.06356	24/166	596,2009,3213,3624,4291,4297,5699,5706,5708,5711,5715,5719,6929,7161,8514,10197,10213,11277,23198,51205,51441,55512,91298,96459,572,672,972,1181,1950,2954,3607,3795,3949,4047,4790,5208,5209,5562,6396,7108,7376,8021,8604,9453,9612,10059,10762,11319,23479,51293,53371,55066,56848,57223,64788,79023,81929,84912,134429,254013,339123,1535,2209,3551,8517,8773,1793,2889,3984,4690,4775,5170,5595,5602,7456,…	BCL2,EML1,HOXB3,INHBA,MLF1,KMT2A,PSMB10,PSMC6,PSMD2,PSMD5,PSMD9,PSMD13,TCF3,TP73,KCNAB2,PSME3,PSMD14,TREX1,PSME4,ACP6,YTHDF2,SMPD3,C12orf29,FNIP1,BAD,BRCA1,CD74,CLCN2,EGF,GSTZ1,FOXK2,KHK,LDLR,LSS,NFKB1,PFKFB2,PFKFB3,PRKAA1,SEC13,TM7SF2,NR1H2,NUP214,SLC25A12,GGPS1,NCOR2,DNM1L,NUP50,ECD,ISCU,CD320,NUP54,PDPR,SPHK2,PPP4R3B,LMF1,NUP37,SEH1L,SLC35B4,STARD4,ETFBKMT,JMJD8,CYBA,FCGR1A,IKBKB,IKBKG,SNAP23,…
8_Member	GO Biological Processes	GO:0002244	hematopoietic progenitor cell differentiation	-4.94574	-2.06356	24/166	596,2009,3213,3624,4291,4297,5699,5706,5708,5711,5715,5719,6929,7161,8514,10197,10213,11277,23198,51205,51441,55512,91298,96459	BCL2,EML1,HOXB3,INHBA,MLF1,KMT2A,PSMB10,PSMC6,PSMD2,PSMD5,PSMD9,PSMD13,TCF3,TP73,KCNAB2,PSME3,PSMD14,TREX1,PSME4,ACP6,YTHDF2,SMPD3,C12orf29,FNIP1
8_Member	GO Biological Processes	GO:0062012	regulation of small molecule metabolic process	-4.94192	-2.06356	48/459	572,672,972,1181,1950,2954,3607,3795,3949,4047,4790,5208,5209,5562,5699,5706,5708,5711,5715,5719,6396,7108,7376,8021,8604,9453,9612,10059,10197,10213,10762,11277,11319,23198,23479,51293,53371,55066,55512,56848,57223,64788,79023,81929,84912,134429,254013,339123	BAD,BRCA1,CD74,CLCN2,EGF,GSTZ1,FOXK2,KHK,LDLR,LSS,NFKB1,PFKFB2,PFKFB3,PRKAA1,PSMB10,PSMC6,PSMD2,PSMD5,PSMD9,PSMD13,SEC13,TM7SF2,NR1H2,NUP214,SLC25A12,GGPS1,NCOR2,DNM1L,PSME3,PSMD14,NUP50,TREX1,ECD,PSME4,ISCU,CD320,NUP54,PDPR,SMPD3,SPHK2,PPP4R3B,LMF1,NUP37,SEH1L,SLC35B4,STARD4,ETFBKMT,JMJD8
3_Member	GO Biological Processes	GO:0060271	cilium assembly	-4.91559	-2.0626	43/395	1453,3911,4134,4750,5108,8481,8636,9474,9738,9786,9814,22995,23216,23354,25886,26005,26123,26140,27352,28981,29105,51134,54662,54806,54820,54874,55125,55212,55764,57560,57787,79598,80184,83547,83874,84902,90410,116840,132320,138639,153241,261734,282809	CSNK1D,LAMA5,MAP4,NEK1,PCM1,OFD1,SSNA1,ATG5,CCP110,KIAA0586,SFI1,CEP152,TBC1D1,HAUS5,POC1A,C2CD3,TCTN3,TTLL3,SGSM3,IFT81,CFAP20,CEP83,TBC1D13,AHI1,NDE1,FNBP1L,CEP192,BBS7,IFT122,IFT80,MARK4,CEP97,CEP290,RILP,TBC1D10A,CEP89,IFT20,CNTROB,SCLT1,PTPDC1,CEP120,NPHP4,POC1B
3_Member	GO Biological Processes	GO:0022406	membrane docking	-4.90145	-2.0626	25/178	1453,5108,8481,8636,8675,9738,9814,10497,11311,22995,23354,26005,26123,51134,54806,54820,55125,57787,64598,65009,79598,80184,84902,132320,261734	CSNK1D,PCM1,OFD1,SSNA1,STX16,CCP110,SFI1,UNC13B,VPS45,CEP152,HAUS5,C2CD3,TCTN3,CEP83,AHI1,NDE1,CEP192,MARK4,MOSPD3,NDRG4,CEP97,CEP290,CEP89,SCLT1,NPHP4
5_Member	GO Biological Processes	GO:1902749	regulation of cell cycle G2/M phase transition	-4.85821	-2.03784	28/213	672,995,1019,1111,1453,5108,5569,5699,5706,5708,5711,5715,5719,8481,8636,9555,9738,9814,10197,10213,22995,23198,23354,51347,54820,55125,79621,80184	BRCA1,CDC25C,CDK4,CHEK1,CSNK1D,PCM1,PKIA,PSMB10,PSMC6,PSMD2,PSMD5,PSMD9,PSMD13,OFD1,SSNA1,MACROH2A1,CCP110,SFI1,PSME3,PSMD14,CEP152,PSME4,HAUS5,TAOK3,NDE1,CEP192,RNASEH2B,CEP290
2_Member	GO Biological Processes	GO:0016569	covalent chromatin modification	-4.82438	-2.0256	49/477	604,672,817,1111,1789,2122,3066,3275,3299,4297,5252,5562,5595,6045,6419,6421,7319,7324,7468,9474,9555,9575,9733,9757,9960,10196,10782,10856,22823,23133,23309,25865,27005,28989,30827,51366,51535,51742,54496,54904,56848,79829,79885,80853,83852,94104,114803,151050,284058	BCL6,BRCA1,CAMK2D,CHEK1,DNMT3B,MECOM,HDAC2,PRMT2,HSF4,KMT2A,PHF1,PRKAA1,MAPK3,RNF2,SETMAR,SFPQ,UBE2A,UBE2E1,NSD2,ATG5,MACROH2A1,CLOCK,SART3,KMT2B,USP3,PRMT3,ZNF274,RUVBL2,MTF2,PHF8,SIN3B,PRKD2,USP21,NTMT1,CXXC1,UBR5,PPHLN1,ARID4B,PRMT7,NSD3,SPHK2,NAA40,HDAC11,KDM7A,SETDB2,PAXBP1,MYSM1,KANSL1L,KANSL1
4_Member	GO Biological Processes	GO:0009165	nucleotide biosynthetic process	-4.8112	-2.0256	42/386	111,158,204,272,353,498,516,2618,2954,3607,4522,4832,5208,5209,5562,5634,6240,6396,6470,7371,8021,8564,8604,9374,10762,11277,11319,51144,53371,55066,56848,64834,79023,80347,81929,83594,83666,132001,133686,197258,339123,441024	ADCY5,ADSL,AK2,AMPD3,APRT,ATP5F1A,ATP5MC1,GART,GSTZ1,FOXK2,MTHFD1,NME3,PFKFB2,PFKFB3,PRKAA1,PRPS2,RRM1,SEC13,SHMT1,UCK2,NUP214,KMO,SLC25A12,PPT2,NUP50,TREX1,ECD,HSD17B12,NUP54,PDPR,SPHK2,ELOVL1,NUP37,COASY,SEH1L,NUDT12,PARP9,TAMM41,NADK2,FCSK,JMJD8,MTHFD2L
5_Member	GO Biological Processes	GO:0044772	mitotic cell cycle phase transition	-4.75806	-1.98884	57/588	596,672,835,898,995,1019,1022,1031,1453,1876,1981,2059,3275,3624,4085,4678,5001,5108,5371,5569,5699,5706,5708,5711,5715,5719,6347,7321,7324,8481,8636,8738,8945,9088,9738,9814,10197,10213,10783,10926,11319,22995,23133,23198,23354,25904,51347,54820,54850,54908,55125,55844,56155,57695,79621,80184,143384	BCL2,BRCA1,CASP2,CCNE1,CDC25C,CDK4,CDK7,CDKN2C,CSNK1D,E2F6,EIF4G1,EPS8,PRMT2,INHBA,MAD2L1,NASP,ORC5,PCM1,PML,PKIA,PSMB10,PSMC6,PSMD2,PSMD5,PSMD9,PSMD13,CCL2,UBE2D1,UBE2E1,OFD1,SSNA1,CRADD,BTRC,PKMYT1,CCP110,SFI1,PSME3,PSMD14,NEK6,DBF4,ECD,CEP152,PHF8,PSME4,HAUS5,CNOT10,TAOK3,NDE1,FBXL12,SPDL1,CEP192,PPP2R2D,TEX14,USP37,RNASEH2B,CEP290,CACUL1
6_Member	GO Biological Processes	GO:0016050	vesicle organization	-4.7415	-1.98808	37/325	596,1453,1742,3257,5289,5584,5873,6396,6490,7039,8546,8675,8773,8907,9527,9765,9798,9871,10483,10497,11267,23355,26286,29911,29916,51361,51479,54874,55048,55291,79156,83547,84062,89781,93343,259173,399687	BCL2,CSNK1D,DLG4,HPS1,PIK3C3,PRKCI,RAB27A,SEC13,PMEL,TGFA,AP3B1,STX16,SNAP23,AP1M1,GOSR1,ZFYVE16,IST1,SEC24D,SEC23B,UNC13B,SNF8,VPS8,ARFGAP3,HOOK2,SNX11,HOOK1,ANKFY1,FNBP1L,VPS37C,PPP6R3,PLEKHF1,RILP,DTNBP1,HPS4,MVB12A,ALS2CL,MYO18A
9_Summary	GO Biological Processes	GO:0008380	RNA splicing	-4.6972	-1.95902	48/469	1198,1477,3958,5431,6421,6427,6606,6635,6651,7307,7375,8189,8487,8899,9092,9410,9584,9733,10150,10921,10978,11171,11218,11319,23517,24144,27316,50628,51202,51362,51585,51631,51691,54496,55015,55339,55596,55692,55796,57396,64121,79005,140890,143884,199746,221662,283989,284695,984,1022,6294,8731,10768,64895,79811,636,5562,8665,9326,10856,51081,51657,55164,64963,130916,219988	CLK3,CSTF1,LGALS3,POLR2B,SFPQ,SRSF2,SMN1,SNRPE,SON,U2AF1,USP4,SYMPK,GEMIN2,PRPF4B,SART1,SNRNP40,RBM39,SART3,MBNL2,RNPS1,CLP1,STRAP,DDX20,ECD,MTREX,TFIP11,RBMX,GEMIN4,DDX47,CDC40,PCF11,LUC7L2,LSM8,PRMT7,PRPF39,WDR33,ZCCHC8,LUC7L,MBNL3,CLK4,RRAGC,SCNM1,SREK1,CWF19L2,U2AF1L4,RBM24,TSEN54,ZNF326,CDK11B,CDK7,SAFB,RNMT,AHCYL1,PAPOLG,SLTM,BICD1,PRKAA1,EIF3F,ZNHIT3,RUVBL2,MRPS7,STYXL1,SHQ1,MRPS11,MTERF4,…
9_Member	GO Biological Processes	GO:0008380	RNA splicing	-4.6972	-1.95902	48/469	1198,1477,3958,5431,6421,6427,6606,6635,6651,7307,7375,8189,8487,8899,9092,9410,9584,9733,10150,10921,10978,11171,11218,11319,23517,24144,27316,50628,51202,51362,51585,51631,51691,54496,55015,55339,55596,55692,55796,57396,64121,79005,140890,143884,199746,221662,283989,284695	CLK3,CSTF1,LGALS3,POLR2B,SFPQ,SRSF2,SMN1,SNRPE,SON,U2AF1,USP4,SYMPK,GEMIN2,PRPF4B,SART1,SNRNP40,RBM39,SART3,MBNL2,RNPS1,CLP1,STRAP,DDX20,ECD,MTREX,TFIP11,RBMX,GEMIN4,DDX47,CDC40,PCF11,LUC7L2,LSM8,PRMT7,PRPF39,WDR33,ZCCHC8,LUC7L,MBNL3,CLK4,RRAGC,SCNM1,SREK1,CWF19L2,U2AF1L4,RBM24,TSEN54,ZNF326
5_Member	GO Biological Processes	GO:0044839	cell cycle G2/M phase transition	-4.65824	-1.93478	32/266	672,995,1019,1022,1111,1453,5108,5569,5699,5706,5708,5711,5715,5719,8481,8636,8945,9088,9555,9738,9814,10197,10213,22995,23198,23354,51347,54820,54850,55125,79621,80184	BRCA1,CDC25C,CDK4,CDK7,CHEK1,CSNK1D,PCM1,PKIA,PSMB10,PSMC6,PSMD2,PSMD5,PSMD9,PSMD13,OFD1,SSNA1,BTRC,PKMYT1,MACROH2A1,CCP110,SFI1,PSME3,PSMD14,CEP152,PSME4,HAUS5,TAOK3,NDE1,FBXL12,CEP192,RNASEH2B,CEP290
5_Member	GO Biological Processes	GO:0010389	regulation of G2/M transition of mitotic cell cycle	-4.62639	-1.91717	26/196	672,995,1019,1453,5108,5569,5699,5706,5708,5711,5715,5719,8481,8636,9738,9814,10197,10213,22995,23198,23354,51347,54820,55125,79621,80184	BRCA1,CDC25C,CDK4,CSNK1D,PCM1,PKIA,PSMB10,PSMC6,PSMD2,PSMD5,PSMD9,PSMD13,OFD1,SSNA1,CCP110,SFI1,PSME3,PSMD14,CEP152,PSME4,HAUS5,TAOK3,NDE1,CEP192,RNASEH2B,CEP290
10_Summary	GO Biological Processes	GO:0008610	lipid biosynthetic process	-4.58842	-1.89299	65/708	672,972,1019,1181,2232,2583,2879,2948,3292,3417,3631,3930,3949,4047,4706,4790,5130,5289,5298,5562,5825,7108,7376,8630,8904,9415,9453,9487,9791,10005,10026,10390,10400,11218,11277,23556,23600,25865,27440,51102,51144,51205,51604,51706,54872,55331,55512,56624,56848,56910,64419,64834,65258,66036,79152,79947,80270,81579,84681,94103,120227,127281,132001,134429,376497,975,1154,2627,3613,8835,10908,51447…	BRCA1,CD74,CDK4,CLCN2,FDXR,B4GALNT1,GPX4,GSTM4,HSD17B1,IDH1,INPP4A,LBR,LDLR,LSS,NDUFAB1,NFKB1,PCYT1A,PIK3C3,PI4KB,PRKAA1,ABCD3,TM7SF2,NR1H2,HSD17B6,CPNE1,FADS2,GGPS1,PIGL,PTDSS1,ACOT8,PIGK,CEPT1,PEMT,DDX20,TREX1,PIGN,AMACR,PRKD2,HDHD5,MECR,HSD17B12,ACP6,PIGT,CYB5R1,PIGG,ACER3,SMPD3,ASAH2,SPHK2,STARD7,MTMR14,ELOVL1,MPPE1,MTMR9,FA2H,DHDDS,HSD3B7,PLA2G12A,HINT2,ORMDL3,CYP2R1,PRXL2B,TAMM41,STARD4,SLC…
10_Member	GO Biological Processes	GO:0008610	lipid biosynthetic process	-4.58842	-1.89299	65/708	672,972,1019,1181,2232,2583,2879,2948,3292,3417,3631,3930,3949,4047,4706,4790,5130,5289,5298,5562,5825,7108,7376,8630,8904,9415,9453,9487,9791,10005,10026,10390,10400,11218,11277,23556,23600,25865,27440,51102,51144,51205,51604,51706,54872,55331,55512,56624,56848,56910,64419,64834,65258,66036,79152,79947,80270,81579,84681,94103,120227,127281,132001,134429,376497	BRCA1,CD74,CDK4,CLCN2,FDXR,B4GALNT1,GPX4,GSTM4,HSD17B1,IDH1,INPP4A,LBR,LDLR,LSS,NDUFAB1,NFKB1,PCYT1A,PIK3C3,PI4KB,PRKAA1,ABCD3,TM7SF2,NR1H2,HSD17B6,CPNE1,FADS2,GGPS1,PIGL,PTDSS1,ACOT8,PIGK,CEPT1,PEMT,DDX20,TREX1,PIGN,AMACR,PRKD2,HDHD5,MECR,HSD17B12,ACP6,PIGT,CYB5R1,PIGG,ACER3,SMPD3,ASAH2,SPHK2,STARD7,MTMR14,ELOVL1,MPPE1,MTMR9,FA2H,DHDDS,HSD3B7,PLA2G12A,HINT2,ORMDL3,CYP2R1,PRXL2B,TAMM41,STARD4,SLC…
11_Summary	GO Biological Processes	GO:0071539	protein localization to centrosome	-4.56555	-1.88349	9/31	636,1453,5108,6491,26005,51134,55125,57787,64770,4134,25886,55212,55764,57560,84902	BICD1,CSNK1D,PCM1,STIL,C2CD3,CEP83,CEP192,MARK4,CCDC14,MAP4,POC1A,BBS7,IFT122,IFT80,CEP89
11_Member	GO Biological Processes	GO:0071539	protein localization to centrosome	-4.56555	-1.88349	9/31	636,1453,5108,6491,26005,51134,55125,57787,64770	BICD1,CSNK1D,PCM1,STIL,C2CD3,CEP83,CEP192,MARK4,CCDC14
5_Member	GO Biological Processes	GO:0045786	negative regulation of cell cycle	-4.50431	-1.83522	60/642	596,604,672,835,995,1019,1022,1031,1111,1876,1982,2627,3275,3624,4085,4291,5371,5562,5699,5706,5708,5711,5715,5719,5796,6045,6196,6300,6347,6419,6494,6878,6934,7159,7161,7709,8738,9555,9575,9927,10197,10213,10542,10795,10950,11277,22846,23087,23198,23269,25904,27352,27429,51347,54908,56155,64121,79621,124790,146691	BCL2,BCL6,BRCA1,CASP2,CDC25C,CDK4,CDK7,CDKN2C,CHEK1,E2F6,EIF4G2,GATA6,PRMT2,INHBA,MAD2L1,MLF1,PML,PRKAA1,PSMB10,PSMC6,PSMD2,PSMD5,PSMD9,PSMD13,PTPRK,RNF2,RPS6KA2,MAPK12,CCL2,SETMAR,SIPA1,TAF6,TCF7L2,TP53BP2,TP73,ZBTB17,CRADD,MACROH2A1,CLOCK,MFN2,PSME3,PSMD14,LAMTOR5,ZNF268,BTG3,TREX1,VASH1,TRIM35,PSME4,MGA,CNOT10,SGSM3,HTRA2,TAOK3,SPDL1,TEX14,RRAGC,RNASEH2B,HEXIM2,TOM1L2
5_Member	GO Biological Processes	GO:0000086	G2/M transition of mitotic cell cycle	-4.48601	-1.83398	30/247	672,995,1019,1022,1453,5108,5569,5699,5706,5708,5711,5715,5719,8481,8636,8945,9088,9738,9814,10197,10213,22995,23198,23354,51347,54820,54850,55125,79621,80184	BRCA1,CDC25C,CDK4,CDK7,CSNK1D,PCM1,PKIA,PSMB10,PSMC6,PSMD2,PSMD5,PSMD9,PSMD13,OFD1,SSNA1,BTRC,PKMYT1,CCP110,SFI1,PSME3,PSMD14,CEP152,PSME4,HAUS5,TAOK3,NDE1,FBXL12,CEP192,RNASEH2B,CEP290
3_Member	GO Biological Processes	GO:0044782	cilium organization	-4.44838	-1.83398	43/413	1453,3911,4134,4750,5108,8481,8636,9474,9738,9786,9814,22995,23216,23354,25886,26005,26123,26140,27352,28981,29105,51134,54662,54806,54820,54874,55125,55212,55764,57560,57787,79598,80184,83547,83874,84902,90410,116840,132320,138639,153241,261734,282809	CSNK1D,LAMA5,MAP4,NEK1,PCM1,OFD1,SSNA1,ATG5,CCP110,KIAA0586,SFI1,CEP152,TBC1D1,HAUS5,POC1A,C2CD3,TCTN3,TTLL3,SGSM3,IFT81,CFAP20,CEP83,TBC1D13,AHI1,NDE1,FNBP1L,CEP192,BBS7,IFT122,IFT80,MARK4,CEP97,CEP290,RILP,TBC1D10A,CEP89,IFT20,CNTROB,SCLT1,PTPDC1,CEP120,NPHP4,POC1B
5_Member	GO Biological Processes	GO:0044770	cell cycle phase transition	-4.44538	-1.83398	59/631	596,672,835,898,995,1019,1022,1031,1111,1453,1876,1981,2059,3275,3624,4085,4678,5001,5108,5371,5569,5699,5706,5708,5711,5715,5719,6347,7321,7324,8481,8636,8738,8945,9088,9555,9738,9814,10197,10213,10783,10926,11319,22995,23133,23198,23354,25904,51347,54820,54850,54908,55125,55844,56155,57695,79621,80184,143384	BCL2,BRCA1,CASP2,CCNE1,CDC25C,CDK4,CDK7,CDKN2C,CHEK1,CSNK1D,E2F6,EIF4G1,EPS8,PRMT2,INHBA,MAD2L1,NASP,ORC5,PCM1,PML,PKIA,PSMB10,PSMC6,PSMD2,PSMD5,PSMD9,PSMD13,CCL2,UBE2D1,UBE2E1,OFD1,SSNA1,CRADD,BTRC,PKMYT1,MACROH2A1,CCP110,SFI1,PSME3,PSMD14,NEK6,DBF4,ECD,CEP152,PHF8,PSME4,HAUS5,CNOT10,TAOK3,NDE1,FBXL12,SPDL1,CEP192,PPP2R2D,TEX14,USP37,RNASEH2B,CEP290,CACUL1
2_Member	GO Biological Processes	GO:0018205	peptidyl-lysine modification	-4.44479	-1.83398	42/400	672,1111,1725,1789,2122,3066,4297,4706,5252,5562,5595,6419,7341,7468,8021,9474,9555,9575,9757,10401,10762,10782,10856,22823,30827,51601,51742,53371,54904,56848,57691,79023,79609,79829,81929,83852,84681,151050,151194,254013,284058,751071	BRCA1,CHEK1,DHPS,DNMT3B,MECOM,HDAC2,KMT2A,NDUFAB1,PHF1,PRKAA1,MAPK3,SETMAR,SUMO1,NSD2,NUP214,ATG5,MACROH2A1,CLOCK,KMT2B,PIAS3,NUP50,ZNF274,RUVBL2,MTF2,CXXC1,LIPT1,ARID4B,NUP54,NSD3,SPHK2,KIAA1586,NUP37,VCPKMT,NAA40,SEH1L,SETDB2,HINT2,KANSL1L,METTL21A,ETFBKMT,KANSL1,CSKMT
11_Member	GO Biological Processes	GO:1905508	protein localization to microtubule organizing center	-4.4435	-1.83398	9/32	636,1453,5108,6491,26005,51134,55125,57787,64770	BICD1,CSNK1D,PCM1,STIL,C2CD3,CEP83,CEP192,MARK4,CCDC14
12_Summary	GO Biological Processes	GO:0031023	microtubule organizing center organization	-4.42786	-1.82935	20/134	672,1111,5108,6491,6566,8481,9738,22995,23354,25886,26005,26973,54820,54828,55125,57787,116840,124093,153241,284403,636,1058,1453,2009,2011,2258,4085,4134,4287,4296,5189,5562,5590,6421,6651,6867,8045,8546,8636,10126,10274,10783,23095,26140,28981,28989,29105,29911,51361,54462,54908,55764,56288,57560,79598,79929,84062,84617,84942,85458,90410,127602,157922,2059,2764,3984,4690,5217,5345,5595,5756,716…	BRCA1,CHEK1,PCM1,STIL,SLC16A1,OFD1,CCP110,CEP152,HAUS5,POC1A,C2CD3,CHORDC1,NDE1,BCAS3,CEP192,MARK4,CNTROB,CCDC78,CEP120,WDR62,BICD1,CENPA,CSNK1D,EML1,MARK2,FGF13,MAD2L1,MAP4,ATXN3,MAP3K11,PEX1,PRKAA1,PRKCZ,SFPQ,SON,TACC1,RASSF7,AP3B1,SSNA1,DNAL4,STAG1,NEK6,KIF1B,TTLL3,IFT81,NTMT1,CFAP20,HOOK2,HOOK1,CCSER2,SPDL1,IFT122,PARD3,IFT80,CEP97,MAP6D1,DTNBP1,TUBB6,WDR73,DIXDC1,IFT20,DNAH14,CAMSAP1,EPS8,GM…
12_Member	GO Biological Processes	GO:0031023	microtubule organizing center organization	-4.42786	-1.82935	20/134	672,1111,5108,6491,6566,8481,9738,22995,23354,25886,26005,26973,54820,54828,55125,57787,116840,124093,153241,284403	BRCA1,CHEK1,PCM1,STIL,SLC16A1,OFD1,CCP110,CEP152,HAUS5,POC1A,C2CD3,CHORDC1,NDE1,BCAS3,CEP192,MARK4,CNTROB,CCDC78,CEP120,WDR62
4_Member	GO Biological Processes	GO:0019693	ribose phosphate metabolic process	-4.39091	-1.80311	55/578	111,158,204,272,353,498,516,572,2618,2954,3607,4706,4707,4714,4718,4832,5141,5142,5208,5209,5562,5634,6389,6396,6817,6888,7371,8021,8505,8604,8803,9054,9374,10005,10059,10762,11277,11319,23479,29789,51103,51144,53371,55066,55276,56848,64080,64087,64834,79023,79621,79736,80347,81929,339123	ADCY5,ADSL,AK2,AMPD3,APRT,ATP5F1A,ATP5MC1,BAD,GART,GSTZ1,FOXK2,NDUFAB1,NDUFB1,NDUFB8,NDUFC2,NME3,PDE4A,PDE4B,PFKFB2,PFKFB3,PRKAA1,PRPS2,SDHA,SEC13,SULT1A1,TALDO1,UCK2,NUP214,PARG,SLC25A12,SUCLA2,NFS1,PPT2,ACOT8,DNM1L,NUP50,TREX1,ECD,ISCU,OLA1,NDUFAF1,HSD17B12,NUP54,PDPR,PGM2,SPHK2,RBKS,MCCC2,ELOVL1,NUP37,RNASEH2B,TEFM,COASY,SEH1L,JMJD8
4_Member	GO Biological Processes	GO:0051188	cofactor biosynthetic process	-4.34925	-1.77819	36/326	1371,1535,2232,2235,2618,2730,2954,3145,3607,4522,5092,5208,5209,5562,5860,6396,8021,8564,8803,9054,9374,10762,11277,11319,51144,51629,53371,55066,64834,79023,80347,81929,83594,83666,133686,339123	CPOX,CYBA,FDXR,FECH,GART,GCLM,GSTZ1,HMBS,FOXK2,MTHFD1,PCBD1,PFKFB2,PFKFB3,PRKAA1,QDPR,SEC13,NUP214,KMO,SUCLA2,NFS1,PPT2,NUP50,TREX1,ECD,HSD17B12,SLC25A39,NUP54,PDPR,ELOVL1,NUP37,COASY,SEH1L,NUDT12,PARP9,NADK2,JMJD8
8_Member	GO Biological Processes	GO:0002479	antigen processing and presentation of exogenous peptide antigen via MHC class I, TAP-dependent	-4.3453	-1.77819	14/75	1535,2209,3551,5699,5706,5708,5711,5715,5719,8517,8773,10197,10213,23198	CYBA,FCGR1A,IKBKB,PSMB10,PSMC6,PSMD2,PSMD5,PSMD9,PSMD13,IKBKG,SNAP23,PSME3,PSMD14,PSME4
9_Member	GO Biological Processes	GO:0006397	mRNA processing	-4.29862	-1.75813	52/541	984,1022,1477,3958,5431,6294,6421,6427,6606,6635,6651,7307,7375,8189,8487,8731,8899,9092,9410,9584,9733,10150,10768,10921,10978,11171,11218,11319,23517,24144,27316,50628,51202,51362,51585,51631,51691,54496,55015,55339,55596,55692,55796,64895,79005,79811,140890,143884,199746,221662,283989,284695	CDK11B,CDK7,CSTF1,LGALS3,POLR2B,SAFB,SFPQ,SRSF2,SMN1,SNRPE,SON,U2AF1,USP4,SYMPK,GEMIN2,RNMT,PRPF4B,SART1,SNRNP40,RBM39,SART3,MBNL2,AHCYL1,RNPS1,CLP1,STRAP,DDX20,ECD,MTREX,TFIP11,RBMX,GEMIN4,DDX47,CDC40,PCF11,LUC7L2,LSM8,PRMT7,PRPF39,WDR33,ZCCHC8,LUC7L,MBNL3,PAPOLG,SCNM1,SLTM,SREK1,CWF19L2,U2AF1L4,RBM24,TSEN54,ZNF326
12_Member	GO Biological Processes	GO:0098534	centriole assembly	-4.28751	-1.75813	10/41	672,6491,8481,9738,22995,26005,116840,124093,153241,284403	BRCA1,STIL,OFD1,CCP110,CEP152,C2CD3,CNTROB,CCDC78,CEP120,WDR62
13_Summary	GO Biological Processes	GO:0006520	cellular amino acid metabolic process	-4.28611	-1.75813	39/367	642,1615,2058,2193,2618,2730,2954,4357,4522,5092,5188,5699,5706,5708,5711,5715,5719,5860,6470,8564,8604,9054,10197,10213,10352,10400,10768,23198,23382,29920,56922,57505,64087,80150,89874,112399,124454,132949,441024,2879,2948,3417,6573,9791,23474,81579,376497,686,6817,6821,8803,9374,10005,10678,23479,27158,51144,55066,64834,79178	BLMH,DARS1,EPRS,FARSA,GART,GCLM,GSTZ1,MPST,MTHFD1,PCBD1,GATB,PSMB10,PSMC6,PSMD2,PSMD5,PSMD9,PSMD13,QDPR,SHMT1,KMO,SLC25A12,NFS1,PSME3,PSMD14,WARS2,PEMT,AHCYL1,PSME4,AHCYL2,PYCR2,MCCC1,AARS2,MCCC2,ASRGL1,SLC25A21,EGLN3,EARS2,AASDH,MTHFD2L,GPX4,GSTM4,IDH1,SLC19A1,PTDSS1,ETHE1,PLA2G12A,SLC27A1,BTD,SULT1A1,SUOX,SUCLA2,PPT2,ACOT8,B3GNT2,ISCU,NDOR1,HSD17B12,PDPR,ELOVL1,THTPA
13_Member	GO Biological Processes	GO:0006520	cellular amino acid metabolic process	-4.28611	-1.75813	39/367	642,1615,2058,2193,2618,2730,2954,4357,4522,5092,5188,5699,5706,5708,5711,5715,5719,5860,6470,8564,8604,9054,10197,10213,10352,10400,10768,23198,23382,29920,56922,57505,64087,80150,89874,112399,124454,132949,441024	BLMH,DARS1,EPRS,FARSA,GART,GCLM,GSTZ1,MPST,MTHFD1,PCBD1,GATB,PSMB10,PSMC6,PSMD2,PSMD5,PSMD9,PSMD13,QDPR,SHMT1,KMO,SLC25A12,NFS1,PSME3,PSMD14,WARS2,PEMT,AHCYL1,PSME4,AHCYL2,PYCR2,MCCC1,AARS2,MCCC2,ASRGL1,SLC25A21,EGLN3,EARS2,AASDH,MTHFD2L
8_Member	GO Biological Processes	GO:0038093	Fc receptor signaling pathway	-4.28374	-1.75813	29/241	1793,2209,2889,3551,3984,4690,4775,4790,5170,5595,5602,5699,5706,5708,5711,5715,5719,7456,8517,8945,10006,10197,10213,10458,23118,23198,26999,51517,147179	DOCK1,FCGR1A,RAPGEF1,IKBKB,LIMK1,NCK1,NFATC3,NFKB1,PDPK1,MAPK3,MAPK10,PSMB10,PSMC6,PSMD2,PSMD5,PSMD9,PSMD13,WIPF1,IKBKG,BTRC,ABI1,PSME3,PSMD14,BAIAP2,TAB2,PSME4,CYFIP2,NCKIPSD,WIPF2
14_Summary	GO Biological Processes	GO:0043161	proteasome-mediated ubiquitin-dependent protein catabolic process	-4.27747	-1.75813	43/420	369,1452,1453,4085,4287,5371,5527,5699,5706,5708,5711,5715,5719,6815,7319,7321,7324,7328,7341,7466,8405,8945,9097,9354,9575,10197,10213,10221,10277,10869,10956,23198,23321,25827,25898,51283,54850,55212,55658,64777,79089,90864,130617,975,1508,1950,3949,7318,7375,7436,9960,11267,27005,27429,55048,55230,57563,57695,80700,81792,84669,89910,93343,132671,143384,160418,337867,596,642,672,23759,51366,853…	ARAF,CSNK1A1,CSNK1D,MAD2L1,ATXN3,PML,PPP2R5C,PSMB10,PSMC6,PSMD2,PSMD5,PSMD9,PSMD13,STYX,UBE2A,UBE2D1,UBE2E1,UBE2H,SUMO1,WFS1,SPOP,BTRC,USP14,UBE4A,CLOCK,PSME3,PSMD14,TRIB1,UBE4B,USP19,OS9,PSME4,TRIM2,FBXL2,RCHY1,BFAR,FBXL12,BBS7,RNF126,RMND5B,TMUB2,SPSB3,ZFAND2B,CD81,CTSB,EGF,LDLR,UBA7,USP4,VLDLR,USP3,SNF8,USP21,HTRA2,VPS37C,USP40,KLHL8,USP37,UBXN6,ADAMTS12,USP32,UBE3B,MVB12A,SPATA18,CACUL1,TMTC3…
14_Member	GO Biological Processes	GO:0043161	proteasome-mediated ubiquitin-dependent protein catabolic process	-4.27747	-1.75813	43/420	369,1452,1453,4085,4287,5371,5527,5699,5706,5708,5711,5715,5719,6815,7319,7321,7324,7328,7341,7466,8405,8945,9097,9354,9575,10197,10213,10221,10277,10869,10956,23198,23321,25827,25898,51283,54850,55212,55658,64777,79089,90864,130617	ARAF,CSNK1A1,CSNK1D,MAD2L1,ATXN3,PML,PPP2R5C,PSMB10,PSMC6,PSMD2,PSMD5,PSMD9,PSMD13,STYX,UBE2A,UBE2D1,UBE2E1,UBE2H,SUMO1,WFS1,SPOP,BTRC,USP14,UBE4A,CLOCK,PSME3,PSMD14,TRIB1,UBE4B,USP19,OS9,PSME4,TRIM2,FBXL2,RCHY1,BFAR,FBXL12,BBS7,RNF126,RMND5B,TMUB2,SPSB3,ZFAND2B
1_Member	GO Biological Processes	GO:0022613	ribonucleoprotein complex biogenesis	-4.2526	-1.74222	49/502	636,4931,5562,6203,6606,6635,7375,8487,8665,8945,9092,9326,9733,10360,10438,10856,10978,11103,11171,11218,23517,27316,27340,50628,51081,51202,51491,51631,51657,54496,54512,55015,55164,55178,55636,55651,55692,55695,57062,57647,64963,79954,84135,84864,130916,134430,219988,220064,260294	BICD1,NVL,PRKAA1,RPS9,SMN1,SNRPE,USP4,GEMIN2,EIF3F,BTRC,SART1,ZNHIT3,SART3,NPM3,C1D,RUVBL2,CLP1,KRR1,STRAP,DDX20,MTREX,RBMX,UTP20,GEMIN4,MRPS7,DDX47,NOP16,LUC7L2,STYXL1,PRMT7,EXOSC4,PRPF39,SHQ1,MRM3,CHD7,NHP2,LUC7L,NSUN5,DDX24,DHX37,MRPS11,NOL10,UTP15,RIOX2,MTERF4,WDR36,PATL1,LTO1,NSUN5P2
2_Member	GO Biological Processes	GO:0016571	histone methylation	-4.19709	-1.70486	20/139	672,1789,2122,3275,4297,5252,6419,7468,9555,9757,10196,10782,22823,28989,30827,51742,54496,54904,83852,94104	BRCA1,DNMT3B,MECOM,PRMT2,KMT2A,PHF1,SETMAR,NSD2,MACROH2A1,KMT2B,PRMT3,ZNF274,MTF2,NTMT1,CXXC1,ARID4B,PRMT7,NSD3,SETDB2,PAXBP1
8_Member	GO Biological Processes	GO:0002474	antigen processing and presentation of peptide antigen via MHC class I	-4.19043	-1.70486	16/97	1535,2209,3551,5699,5706,5708,5711,5715,5719,6396,8517,8773,9871,10197,10213,23198	CYBA,FCGR1A,IKBKB,PSMB10,PSMC6,PSMD2,PSMD5,PSMD9,PSMD13,SEC13,IKBKG,SNAP23,SEC24D,PSME3,PSMD14,PSME4
12_Member	GO Biological Processes	GO:0051298	centrosome duplication	-4.18927	-1.70486	13/68	672,6491,8481,9738,22995,25886,26005,26973,54820,55125,116840,153241,284403	BRCA1,STIL,OFD1,CCP110,CEP152,POC1A,C2CD3,CHORDC1,NDE1,CEP192,CNTROB,CEP120,WDR62
4_Member	GO Biological Processes	GO:0009124	nucleoside monophosphate biosynthetic process	-4.18116	-1.70486	26/208	158,204,272,353,498,516,2618,3607,5208,5209,5562,5634,6396,6470,7371,8021,8604,10762,11277,11319,53371,56848,64077,79023,81929,339123	ADSL,AK2,AMPD3,APRT,ATP5F1A,ATP5MC1,GART,FOXK2,PFKFB2,PFKFB3,PRKAA1,PRPS2,SEC13,SHMT1,UCK2,NUP214,SLC25A12,NUP50,TREX1,ECD,NUP54,SPHK2,LHPP,NUP37,SEH1L,JMJD8
3_Member	GO Biological Processes	GO:0030031	cell projection assembly	-4.17093	-1.70275	56/603	1453,2059,3911,4134,4690,4750,5108,5217,5756,8481,8636,9474,9738,9786,9788,9814,9842,22995,23216,23242,23354,25886,26005,26123,26140,26999,27352,28981,29105,51134,51765,54662,54806,54820,54828,54849,54869,54874,55125,55212,55764,57560,57787,79598,80184,83547,83874,84902,90410,116840,132320,138639,153241,196527,261734,282809	CSNK1D,EPS8,LAMA5,MAP4,NCK1,NEK1,PCM1,PFN2,TWF1,OFD1,SSNA1,ATG5,CCP110,KIAA0586,MTSS1,SFI1,PLEKHM1,CEP152,TBC1D1,COBL,HAUS5,POC1A,C2CD3,TCTN3,TTLL3,CYFIP2,SGSM3,IFT81,CFAP20,CEP83,STK26,TBC1D13,AHI1,NDE1,BCAS3,DEF8,EPS8L1,FNBP1L,CEP192,BBS7,IFT122,IFT80,MARK4,CEP97,CEP290,RILP,TBC1D10A,CEP89,IFT20,CNTROB,SCLT1,PTPDC1,CEP120,ANO6,NPHP4,POC1B
2_Member	GO Biological Processes	GO:0018022	peptidyl-lysine methylation	-4.15761	-1.70166	19/129	672,1789,2122,4297,5252,6419,7468,9555,9757,10782,22823,30827,51742,54904,79609,83852,151194,254013,751071	BRCA1,DNMT3B,MECOM,KMT2A,PHF1,SETMAR,NSD2,MACROH2A1,KMT2B,ZNF274,MTF2,CXXC1,ARID4B,NSD3,VCPKMT,SETDB2,METTL21A,ETFBKMT,CSKMT
4_Member	GO Biological Processes	GO:0009156	ribonucleoside monophosphate biosynthetic process	-4.15187	-1.70166	25/197	158,204,272,353,498,516,2618,3607,5208,5209,5562,5634,6396,7371,8021,8604,10762,11277,11319,53371,56848,64077,79023,81929,339123	ADSL,AK2,AMPD3,APRT,ATP5F1A,ATP5MC1,GART,FOXK2,PFKFB2,PFKFB3,PRKAA1,PRPS2,SEC13,UCK2,NUP214,SLC25A12,NUP50,TREX1,ECD,NUP54,SPHK2,LHPP,NUP37,SEH1L,JMJD8
5_Member	GO Biological Processes	GO:0007346	regulation of mitotic cell cycle	-4.14349	-1.70166	60/661	596,604,672,835,898,995,1019,1031,1111,1453,1950,1981,3275,4085,5108,5371,5569,5699,5706,5708,5711,5715,5719,6347,6419,7039,7161,7321,7324,8481,8636,8738,8945,9088,9555,9738,9814,10197,10213,10274,10783,10795,10950,11319,22995,23087,23198,23354,25904,51347,54820,54908,55125,55512,56155,56624,79598,79621,80184,146691	BCL2,BCL6,BRCA1,CASP2,CCNE1,CDC25C,CDK4,CDKN2C,CHEK1,CSNK1D,EGF,EIF4G1,PRMT2,MAD2L1,PCM1,PML,PKIA,PSMB10,PSMC6,PSMD2,PSMD5,PSMD9,PSMD13,CCL2,SETMAR,TGFA,TP73,UBE2D1,UBE2E1,OFD1,SSNA1,CRADD,BTRC,PKMYT1,MACROH2A1,CCP110,SFI1,PSME3,PSMD14,STAG1,NEK6,ZNF268,BTG3,ECD,CEP152,TRIM35,PSME4,HAUS5,CNOT10,TAOK3,NDE1,SPDL1,CEP192,SMPD3,TEX14,ASAH2,CEP97,RNASEH2B,CEP290,TOM1L2
5_Member	GO Biological Processes	GO:1901987	regulation of cell cycle phase transition	-4.13744	-1.70166	47/480	596,672,835,898,995,1019,1031,1111,1453,1981,3275,4085,5108,5371,5569,5699,5706,5708,5711,5715,5719,6347,7321,7324,8481,8636,8738,8945,9555,9738,9814,10197,10213,10783,10926,11319,22995,23198,23354,25904,51347,54820,54908,55125,56155,79621,80184	BCL2,BRCA1,CASP2,CCNE1,CDC25C,CDK4,CDKN2C,CHEK1,CSNK1D,EIF4G1,PRMT2,MAD2L1,PCM1,PML,PKIA,PSMB10,PSMC6,PSMD2,PSMD5,PSMD9,PSMD13,CCL2,UBE2D1,UBE2E1,OFD1,SSNA1,CRADD,BTRC,MACROH2A1,CCP110,SFI1,PSME3,PSMD14,NEK6,DBF4,ECD,CEP152,PSME4,HAUS5,CNOT10,TAOK3,NDE1,SPDL1,CEP192,TEX14,RNASEH2B,CEP290
3_Member	GO Biological Processes	GO:0120031	plasma membrane bounded cell projection assembly	-4.13138	-1.70166	55/591	1453,2059,3911,4134,4690,4750,5108,5217,5756,8481,8636,9474,9738,9786,9788,9814,9842,22995,23216,23242,23354,25886,26005,26123,26140,27352,28981,29105,51134,51765,54662,54806,54820,54828,54849,54869,54874,55125,55212,55764,57560,57787,79598,80184,83547,83874,84902,90410,116840,132320,138639,153241,196527,261734,282809	CSNK1D,EPS8,LAMA5,MAP4,NCK1,NEK1,PCM1,PFN2,TWF1,OFD1,SSNA1,ATG5,CCP110,KIAA0586,MTSS1,SFI1,PLEKHM1,CEP152,TBC1D1,COBL,HAUS5,POC1A,C2CD3,TCTN3,TTLL3,SGSM3,IFT81,CFAP20,CEP83,STK26,TBC1D13,AHI1,NDE1,BCAS3,DEF8,EPS8L1,FNBP1L,CEP192,BBS7,IFT122,IFT80,MARK4,CEP97,CEP290,RILP,TBC1D10A,CEP89,IFT20,CNTROB,SCLT1,PTPDC1,CEP120,ANO6,NPHP4,POC1B
15_Summary	GO Biological Processes	GO:0000959	mitochondrial RNA metabolic process	-4.09749	-1.67507	10/43	5562,9692,10352,25821,57505,79736,124454,130916,133522,158234	PRKAA1,PRORP,WARS2,MTO1,AARS2,TEFM,EARS2,MTERF4,PPARGC1B,TRMT10B
15_Member	GO Biological Processes	GO:0000959	mitochondrial RNA metabolic process	-4.09749	-1.67507	10/43	5562,9692,10352,25821,57505,79736,124454,130916,133522,158234	PRKAA1,PRORP,WARS2,MTO1,AARS2,TEFM,EARS2,MTERF4,PPARGC1B,TRMT10B
8_Member	GO Biological Processes	GO:0042590	antigen processing and presentation of exogenous peptide antigen via MHC class I	-4.08712	-1.67187	14/79	1535,2209,3551,5699,5706,5708,5711,5715,5719,8517,8773,10197,10213,23198	CYBA,FCGR1A,IKBKB,PSMB10,PSMC6,PSMD2,PSMD5,PSMD9,PSMD13,IKBKG,SNAP23,PSME3,PSMD14,PSME4
2_Member	GO Biological Processes	GO:1902275	regulation of chromatin organization	-4.05176	-1.64357	24/188	604,672,817,1111,1789,4297,5252,5595,9474,9555,9733,9757,10782,10856,22823,23133,25865,51366,51535,54454,54904,56848,79829,94104	BCL6,BRCA1,CAMK2D,CHEK1,DNMT3B,KMT2A,PHF1,MAPK3,ATG5,MACROH2A1,SART3,KMT2B,ZNF274,RUVBL2,MTF2,PHF8,PRKD2,UBR5,PPHLN1,ATAD2B,NSD3,SPHK2,NAA40,PAXBP1
5_Member	GO Biological Processes	GO:1901990	regulation of mitotic cell cycle phase transition	-4.03201	-1.64043	44/444	596,672,835,898,995,1019,1031,1453,1981,3275,4085,5108,5371,5569,5699,5706,5708,5711,5715,5719,6347,7321,7324,8481,8636,8738,8945,9738,9814,10197,10213,10783,11319,22995,23198,23354,25904,51347,54820,54908,55125,56155,79621,80184	BCL2,BRCA1,CASP2,CCNE1,CDC25C,CDK4,CDKN2C,CSNK1D,EIF4G1,PRMT2,MAD2L1,PCM1,PML,PKIA,PSMB10,PSMC6,PSMD2,PSMD5,PSMD9,PSMD13,CCL2,UBE2D1,UBE2E1,OFD1,SSNA1,CRADD,BTRC,CCP110,SFI1,PSME3,PSMD14,NEK6,ECD,CEP152,PSME4,HAUS5,CNOT10,TAOK3,NDE1,SPDL1,CEP192,TEX14,RNASEH2B,CEP290
8_Member	GO Biological Processes	GO:0070498	interleukin-1-mediated signaling pathway	-4.02718	-1.64043	16/100	3551,4615,4790,5595,5699,5706,5708,5711,5715,5719,8517,8945,10197,10213,23118,23198	IKBKB,MYD88,NFKB1,MAPK3,PSMB10,PSMC6,PSMD2,PSMD5,PSMD9,PSMD13,IKBKG,BTRC,PSME3,PSMD14,TAB2,PSME4
4_Member	GO Biological Processes	GO:0019362	pyridine nucleotide metabolic process	-4.01529	-1.64043	24/189	2820,3417,3607,5208,5209,5562,6396,6888,8021,8514,8564,8604,10762,11277,11319,53371,55276,64080,79023,81929,83594,83666,133686,339123	GPD2,IDH1,FOXK2,PFKFB2,PFKFB3,PRKAA1,SEC13,TALDO1,NUP214,KCNAB2,KMO,SLC25A12,NUP50,TREX1,ECD,NUP54,PGM2,RBKS,NUP37,SEH1L,NUDT12,PARP9,NADK2,JMJD8
4_Member	GO Biological Processes	GO:0046496	nicotinamide nucleotide metabolic process	-4.01529	-1.64043	24/189	2820,3417,3607,5208,5209,5562,6396,6888,8021,8514,8564,8604,10762,11277,11319,53371,55276,64080,79023,81929,83594,83666,133686,339123	GPD2,IDH1,FOXK2,PFKFB2,PFKFB3,PRKAA1,SEC13,TALDO1,NUP214,KCNAB2,KMO,SLC25A12,NUP50,TREX1,ECD,NUP54,PGM2,RBKS,NUP37,SEH1L,NUDT12,PARP9,NADK2,JMJD8
4_Member	GO Biological Processes	GO:0006164	purine nucleotide biosynthetic process	-4.00724	-1.64043	33/300	111,158,204,272,353,498,516,2618,2954,3607,4522,4832,5208,5209,5562,5634,6396,8021,8604,9374,10762,11277,11319,51144,53371,55066,56848,64834,79023,80347,81929,339123,441024	ADCY5,ADSL,AK2,AMPD3,APRT,ATP5F1A,ATP5MC1,GART,GSTZ1,FOXK2,MTHFD1,NME3,PFKFB2,PFKFB3,PRKAA1,PRPS2,SEC13,NUP214,SLC25A12,PPT2,NUP50,TREX1,ECD,HSD17B12,NUP54,PDPR,SPHK2,ELOVL1,NUP37,COASY,SEH1L,JMJD8,MTHFD2L
8_Member	GO Biological Processes	GO:0070646	protein modification by small protein removal	-4.00724	-1.64043	33/300	367,672,3607,4287,5699,5706,5708,5711,5715,5719,7321,7375,8517,8665,9097,9318,9733,9738,9960,10197,10213,10869,10980,23198,27005,54629,55230,55793,57695,84669,91833,114785,114803	AR,BRCA1,FOXK2,ATXN3,PSMB10,PSMC6,PSMD2,PSMD5,PSMD9,PSMD13,UBE2D1,USP4,IKBKG,EIF3F,USP14,COPS2,SART3,CCP110,USP3,PSME3,PSMD14,USP19,COPS6,PSME4,USP21,MINDY2,USP40,MINDY1,USP37,USP32,WDR20,MBD6,MYSM1
4_Member	GO Biological Processes	GO:0072522	purine-containing compound biosynthetic process	-4.00216	-1.64043	34/313	111,158,204,272,353,498,516,2618,2954,3607,4522,4832,5208,5209,5562,5634,6396,6470,8021,8604,9374,10762,11277,11319,51144,53371,55066,56848,64834,79023,80347,81929,339123,441024	ADCY5,ADSL,AK2,AMPD3,APRT,ATP5F1A,ATP5MC1,GART,GSTZ1,FOXK2,MTHFD1,NME3,PFKFB2,PFKFB3,PRKAA1,PRPS2,SEC13,SHMT1,NUP214,SLC25A12,PPT2,NUP50,TREX1,ECD,HSD17B12,NUP54,PDPR,SPHK2,ELOVL1,NUP37,COASY,SEH1L,JMJD8,MTHFD2L
9_Member	GO Biological Processes	GO:0000377	RNA splicing, via transesterification reactions with bulged adenosine as nucleophile	-3.98492	-1.63756	39/379	1477,5431,6421,6427,6606,6635,6651,7307,7375,8189,8487,8899,9092,9410,9733,10150,10921,10978,11171,11218,23517,24144,27316,50628,51362,51585,51631,51691,54496,55015,55339,55596,55692,55796,79005,140890,143884,199746,221662	CSTF1,POLR2B,SFPQ,SRSF2,SMN1,SNRPE,SON,U2AF1,USP4,SYMPK,GEMIN2,PRPF4B,SART1,SNRNP40,SART3,MBNL2,RNPS1,CLP1,STRAP,DDX20,MTREX,TFIP11,RBMX,GEMIN4,CDC40,PCF11,LUC7L2,LSM8,PRMT7,PRPF39,WDR33,ZCCHC8,LUC7L,MBNL3,SCNM1,SREK1,CWF19L2,U2AF1L4,RBM24
9_Member	GO Biological Processes	GO:0000398	mRNA splicing, via spliceosome	-3.98492	-1.63756	39/379	1477,5431,6421,6427,6606,6635,6651,7307,7375,8189,8487,8899,9092,9410,9733,10150,10921,10978,11171,11218,23517,24144,27316,50628,51362,51585,51631,51691,54496,55015,55339,55596,55692,55796,79005,140890,143884,199746,221662	CSTF1,POLR2B,SFPQ,SRSF2,SMN1,SNRPE,SON,U2AF1,USP4,SYMPK,GEMIN2,PRPF4B,SART1,SNRNP40,SART3,MBNL2,RNPS1,CLP1,STRAP,DDX20,MTREX,TFIP11,RBMX,GEMIN4,CDC40,PCF11,LUC7L2,LSM8,PRMT7,PRPF39,WDR33,ZCCHC8,LUC7L,MBNL3,SCNM1,SREK1,CWF19L2,U2AF1L4,RBM24
4_Member	GO Biological Processes	GO:0072521	purine-containing compound metabolic process	-3.98081	-1.63756	56/613	111,158,204,272,353,498,516,572,2618,2954,3607,4522,4706,4707,4714,4718,4832,5141,5142,5208,5209,5562,5634,6389,6396,6470,6817,8021,8505,8604,8803,9054,9374,10005,10059,10400,10762,10768,11277,11319,23382,23479,29789,51103,51144,53371,55066,56848,64087,64834,79023,79736,80347,81929,339123,441024	ADCY5,ADSL,AK2,AMPD3,APRT,ATP5F1A,ATP5MC1,BAD,GART,GSTZ1,FOXK2,MTHFD1,NDUFAB1,NDUFB1,NDUFB8,NDUFC2,NME3,PDE4A,PDE4B,PFKFB2,PFKFB3,PRKAA1,PRPS2,SDHA,SEC13,SHMT1,SULT1A1,NUP214,PARG,SLC25A12,SUCLA2,NFS1,PPT2,ACOT8,DNM1L,PEMT,NUP50,AHCYL1,TREX1,ECD,AHCYL2,ISCU,OLA1,NDUFAF1,HSD17B12,NUP54,PDPR,SPHK2,MCCC2,ELOVL1,NUP37,TEFM,COASY,SEH1L,JMJD8,MTHFD2L
1_Member	GO Biological Processes	GO:0006364	rRNA processing	-3.97478	-1.63752	26/214	4931,6203,8945,9092,9326,10360,10438,11103,23517,27340,50628,51202,54512,55164,55178,55636,55651,55695,57062,57647,64963,79954,84135,130916,134430,260294	NVL,RPS9,BTRC,SART1,ZNHIT3,NPM3,C1D,KRR1,MTREX,UTP20,GEMIN4,DDX47,EXOSC4,SHQ1,MRM3,CHD7,NHP2,NSUN5,DDX24,DHX37,MRPS11,NOL10,UTP15,MTERF4,WDR36,NSUN5P2
16_Summary	GO Biological Processes	GO:0001510	RNA methylation	-3.96513	-1.63378	14/81	6894,8731,9692,9836,25821,51605,55178,55695,80745,84705,91801,130916,158234,260294,55644,57505,64118,129450,285381,9582,55651,1615,2058,2193,5188,9097,10352,10978,124454,283989	TARBP1,RNMT,PRORP,LCMT2,MTO1,TRMT6,MRM3,NSUN5,THUMPD2,GTPBP3,ALKBH8,MTERF4,TRMT10B,NSUN5P2,OSGEP,AARS2,DUS1L,TYW5,DPH3,APOBEC3B,NHP2,DARS1,EPRS,FARSA,GATB,USP14,WARS2,CLP1,EARS2,TSEN54
16_Member	GO Biological Processes	GO:0001510	RNA methylation	-3.96513	-1.63378	14/81	6894,8731,9692,9836,25821,51605,55178,55695,80745,84705,91801,130916,158234,260294	TARBP1,RNMT,PRORP,LCMT2,MTO1,TRMT6,MRM3,NSUN5,THUMPD2,GTPBP3,ALKBH8,MTERF4,TRMT10B,NSUN5P2
14_Member	GO Biological Processes	GO:0044257	cellular protein catabolic process	-3.95086	-1.63221	67/773	369,975,1452,1453,1508,1950,3949,4085,4287,5371,5527,5699,5706,5708,5711,5715,5719,6815,7318,7319,7321,7324,7328,7341,7375,7436,7466,8405,8945,9097,9354,9575,9960,10197,10213,10221,10277,10869,10956,11267,23198,23321,25827,25898,27005,27429,51283,54850,55048,55212,55230,55658,57563,57695,64777,79089,80700,81792,84669,89910,90864,93343,130617,132671,143384,160418,337867	ARAF,CD81,CSNK1A1,CSNK1D,CTSB,EGF,LDLR,MAD2L1,ATXN3,PML,PPP2R5C,PSMB10,PSMC6,PSMD2,PSMD5,PSMD9,PSMD13,STYX,UBA7,UBE2A,UBE2D1,UBE2E1,UBE2H,SUMO1,USP4,VLDLR,WFS1,SPOP,BTRC,USP14,UBE4A,CLOCK,USP3,PSME3,PSMD14,TRIB1,UBE4B,USP19,OS9,SNF8,PSME4,TRIM2,FBXL2,RCHY1,USP21,HTRA2,BFAR,FBXL12,VPS37C,BBS7,USP40,RNF126,KLHL8,USP37,RMND5B,TMUB2,UBXN6,ADAMTS12,USP32,UBE3B,SPSB3,MVB12A,ZFAND2B,SPATA18,CACUL1,TMTC3…
14_Member	GO Biological Processes	GO:0019941	modification-dependent protein catabolic process	-3.94758	-1.63221	57/629	369,1452,1453,1950,4085,4287,5371,5527,5699,5706,5708,5711,5715,5719,6815,7318,7319,7321,7324,7328,7341,7375,7466,8405,8945,9097,9354,9575,9960,10197,10213,10221,10277,10869,10956,11267,23198,23321,25827,25898,27005,51283,54850,55048,55212,55230,55658,57563,57695,64777,79089,84669,89910,90864,93343,130617,143384	ARAF,CSNK1A1,CSNK1D,EGF,MAD2L1,ATXN3,PML,PPP2R5C,PSMB10,PSMC6,PSMD2,PSMD5,PSMD9,PSMD13,STYX,UBA7,UBE2A,UBE2D1,UBE2E1,UBE2H,SUMO1,USP4,WFS1,SPOP,BTRC,USP14,UBE4A,CLOCK,USP3,PSME3,PSMD14,TRIB1,UBE4B,USP19,OS9,SNF8,PSME4,TRIM2,FBXL2,RCHY1,USP21,BFAR,FBXL12,VPS37C,BBS7,USP40,RNF126,KLHL8,USP37,RMND5B,TMUB2,USP32,UBE3B,SPSB3,MVB12A,ZFAND2B,CACUL1
17_Summary	GO Biological Processes	GO:0006914	autophagy	-3.94069	-1.63221	48/503	572,596,1981,1982,2011,3607,3691,3708,5289,5562,5595,7249,8517,9474,9776,9842,9927,10059,10287,10542,11267,23001,23118,23241,25782,25827,26100,27429,51368,53917,54874,55048,55578,55763,57535,64121,64419,66036,79156,80700,81846,83636,85363,90410,90427,93343,132671,401505	BAD,BCL2,EIF4G1,EIF4G2,MARK2,FOXK2,ITGB4,ITPR1,PIK3C3,PRKAA1,MAPK3,TSC2,IKBKG,ATG5,ATG13,PLEKHM1,MFN2,DNM1L,RGS19,LAMTOR5,SNF8,WDFY3,TAB2,PACS2,RAB3GAP2,FBXL2,WIPI2,HTRA2,TEX264,RAB24,FNBP1L,VPS37C,SUPT20H,EXOC1,KIAA1324,RRAGC,MTMR14,MTMR9,PLEKHF1,UBXN6,SBF2,C19orf12,TRIM5,IFT20,BMF,MVB12A,SPATA18,TOMM5
17_Member	GO Biological Processes	GO:0006914	autophagy	-3.94069	-1.63221	48/503	572,596,1981,1982,2011,3607,3691,3708,5289,5562,5595,7249,8517,9474,9776,9842,9927,10059,10287,10542,11267,23001,23118,23241,25782,25827,26100,27429,51368,53917,54874,55048,55578,55763,57535,64121,64419,66036,79156,80700,81846,83636,85363,90410,90427,93343,132671,401505	BAD,BCL2,EIF4G1,EIF4G2,MARK2,FOXK2,ITGB4,ITPR1,PIK3C3,PRKAA1,MAPK3,TSC2,IKBKG,ATG5,ATG13,PLEKHM1,MFN2,DNM1L,RGS19,LAMTOR5,SNF8,WDFY3,TAB2,PACS2,RAB3GAP2,FBXL2,WIPI2,HTRA2,TEX264,RAB24,FNBP1L,VPS37C,SUPT20H,EXOC1,KIAA1324,RRAGC,MTMR14,MTMR9,PLEKHF1,UBXN6,SBF2,C19orf12,TRIM5,IFT20,BMF,MVB12A,SPATA18,TOMM5
17_Member	GO Biological Processes	GO:0061919	process utilizing autophagic mechanism	-3.94069	-1.63221	48/503	572,596,1981,1982,2011,3607,3691,3708,5289,5562,5595,7249,8517,9474,9776,9842,9927,10059,10287,10542,11267,23001,23118,23241,25782,25827,26100,27429,51368,53917,54874,55048,55578,55763,57535,64121,64419,66036,79156,80700,81846,83636,85363,90410,90427,93343,132671,401505	BAD,BCL2,EIF4G1,EIF4G2,MARK2,FOXK2,ITGB4,ITPR1,PIK3C3,PRKAA1,MAPK3,TSC2,IKBKG,ATG5,ATG13,PLEKHM1,MFN2,DNM1L,RGS19,LAMTOR5,SNF8,WDFY3,TAB2,PACS2,RAB3GAP2,FBXL2,WIPI2,HTRA2,TEX264,RAB24,FNBP1L,VPS37C,SUPT20H,EXOC1,KIAA1324,RRAGC,MTMR14,MTMR9,PLEKHF1,UBXN6,SBF2,C19orf12,TRIM5,IFT20,BMF,MVB12A,SPATA18,TOMM5
4_Member	GO Biological Processes	GO:0009161	ribonucleoside monophosphate metabolic process	-3.92527	-1.62516	37/355	158,204,272,353,498,516,572,2618,3607,4706,4707,4714,4718,5208,5209,5562,5634,6389,6396,7371,8021,8505,8604,10059,10762,11277,11319,23479,29789,51103,53371,56848,64077,79023,79736,81929,339123	ADSL,AK2,AMPD3,APRT,ATP5F1A,ATP5MC1,BAD,GART,FOXK2,NDUFAB1,NDUFB1,NDUFB8,NDUFC2,PFKFB2,PFKFB3,PRKAA1,PRPS2,SDHA,SEC13,UCK2,NUP214,PARG,SLC25A12,DNM1L,NUP50,TREX1,ECD,ISCU,OLA1,NDUFAF1,NUP54,SPHK2,LHPP,NUP37,TEFM,SEH1L,JMJD8
8_Member	GO Biological Processes	GO:1902036	regulation of hematopoietic stem cell differentiation	-3.92264	-1.62516	13/72	4297,5699,5706,5708,5711,5715,5719,6929,7161,10197,10213,23198,51441	KMT2A,PSMB10,PSMC6,PSMD2,PSMD5,PSMD9,PSMD13,TCF3,TP73,PSME3,PSMD14,PSME4,YTHDF2
9_Member	GO Biological Processes	GO:0000375	RNA splicing, via transesterification reactions	-3.9126	-1.62097	39/382	1477,5431,6421,6427,6606,6635,6651,7307,7375,8189,8487,8899,9092,9410,9733,10150,10921,10978,11171,11218,23517,24144,27316,50628,51362,51585,51631,51691,54496,55015,55339,55596,55692,55796,79005,140890,143884,199746,221662	CSTF1,POLR2B,SFPQ,SRSF2,SMN1,SNRPE,SON,U2AF1,USP4,SYMPK,GEMIN2,PRPF4B,SART1,SNRNP40,SART3,MBNL2,RNPS1,CLP1,STRAP,DDX20,MTREX,TFIP11,RBMX,GEMIN4,CDC40,PCF11,LUC7L2,LSM8,PRMT7,PRPF39,WDR33,ZCCHC8,LUC7L,MBNL3,SCNM1,SREK1,CWF19L2,U2AF1L4,RBM24
14_Member	GO Biological Processes	GO:0010498	proteasomal protein catabolic process	-3.90773	-1.62097	46/477	369,1452,1453,4085,4287,5371,5527,5699,5706,5708,5711,5715,5719,6815,7319,7321,7324,7328,7341,7466,8405,8945,9097,9354,9575,10197,10213,10221,10277,10869,10956,23198,23321,25827,25898,51283,54850,55212,55658,64777,79089,80700,90864,130617,160418,337867	ARAF,CSNK1A1,CSNK1D,MAD2L1,ATXN3,PML,PPP2R5C,PSMB10,PSMC6,PSMD2,PSMD5,PSMD9,PSMD13,STYX,UBE2A,UBE2D1,UBE2E1,UBE2H,SUMO1,WFS1,SPOP,BTRC,USP14,UBE4A,CLOCK,PSME3,PSMD14,TRIB1,UBE4B,USP19,OS9,PSME4,TRIM2,FBXL2,RCHY1,BFAR,FBXL12,BBS7,RNF126,RMND5B,TMUB2,UBXN6,SPSB3,ZFAND2B,TMTC3,UBAC2
2_Member	GO Biological Processes	GO:0031056	regulation of histone modification	-3.89551	-1.61401	20/146	604,672,817,1111,1789,4297,5252,5595,9474,9555,9733,9757,10782,10856,22823,25865,51366,54904,56848,94104	BCL6,BRCA1,CAMK2D,CHEK1,DNMT3B,KMT2A,PHF1,MAPK3,ATG5,MACROH2A1,SART3,KMT2B,ZNF274,RUVBL2,MTF2,PRKD2,UBR5,NSD3,SPHK2,PAXBP1
12_Member	GO Biological Processes	GO:0007098	centrosome cycle	-3.84333	-1.56703	18/125	672,1111,5108,6491,6566,8481,9738,22995,23354,25886,26005,26973,54820,55125,57787,116840,153241,284403	BRCA1,CHEK1,PCM1,STIL,SLC16A1,OFD1,CCP110,CEP152,HAUS5,POC1A,C2CD3,CHORDC1,NDE1,CEP192,MARK4,CNTROB,CEP120,WDR62
12_Member	GO Biological Processes	GO:0007099	centriole replication	-3.80712	-1.54874	9/38	672,6491,8481,9738,22995,26005,116840,153241,284403	BRCA1,STIL,OFD1,CCP110,CEP152,C2CD3,CNTROB,CEP120,WDR62
4_Member	GO Biological Processes	GO:0009127	purine nucleoside monophosphate biosynthetic process	-3.80643	-1.54874	23/183	158,204,272,353,498,516,2618,3607,5208,5209,5562,6396,8021,8604,10762,11277,11319,53371,56848,64077,79023,81929,339123	ADSL,AK2,AMPD3,APRT,ATP5F1A,ATP5MC1,GART,FOXK2,PFKFB2,PFKFB3,PRKAA1,SEC13,NUP214,SLC25A12,NUP50,TREX1,ECD,NUP54,SPHK2,LHPP,NUP37,SEH1L,JMJD8
4_Member	GO Biological Processes	GO:0009168	purine ribonucleoside monophosphate biosynthetic process	-3.80643	-1.54874	23/183	158,204,272,353,498,516,2618,3607,5208,5209,5562,6396,8021,8604,10762,11277,11319,53371,56848,64077,79023,81929,339123	ADSL,AK2,AMPD3,APRT,ATP5F1A,ATP5MC1,GART,FOXK2,PFKFB2,PFKFB3,PRKAA1,SEC13,NUP214,SLC25A12,NUP50,TREX1,ECD,NUP54,SPHK2,LHPP,NUP37,SEH1L,JMJD8
4_Member	GO Biological Processes	GO:0006733	oxidoreduction coenzyme metabolic process	-3.80484	-1.54874	25/207	2232,2820,3417,3607,5208,5209,5562,6396,6888,8021,8514,8564,8604,10762,11277,11319,53371,55276,64080,79023,81929,83594,83666,133686,339123	FDXR,GPD2,IDH1,FOXK2,PFKFB2,PFKFB3,PRKAA1,SEC13,TALDO1,NUP214,KCNAB2,KMO,SLC25A12,NUP50,TREX1,ECD,NUP54,PGM2,RBKS,NUP37,SEH1L,NUDT12,PARP9,NADK2,JMJD8
14_Member	GO Biological Processes	GO:0006511	ubiquitin-dependent protein catabolic process	-3.79773	-1.54654	56/623	369,1452,1453,1950,4085,4287,5371,5527,5699,5706,5708,5711,5715,5719,6815,7319,7321,7324,7328,7341,7375,7466,8405,8945,9097,9354,9575,9960,10197,10213,10221,10277,10869,10956,11267,23198,23321,25827,25898,27005,51283,54850,55048,55212,55230,55658,57563,57695,64777,79089,84669,89910,90864,93343,130617,143384	ARAF,CSNK1A1,CSNK1D,EGF,MAD2L1,ATXN3,PML,PPP2R5C,PSMB10,PSMC6,PSMD2,PSMD5,PSMD9,PSMD13,STYX,UBE2A,UBE2D1,UBE2E1,UBE2H,SUMO1,USP4,WFS1,SPOP,BTRC,USP14,UBE4A,CLOCK,USP3,PSME3,PSMD14,TRIB1,UBE4B,USP19,OS9,SNF8,PSME4,TRIM2,FBXL2,RCHY1,USP21,BFAR,FBXL12,VPS37C,BBS7,USP40,RNF126,KLHL8,USP37,RMND5B,TMUB2,USP32,UBE3B,SPSB3,MVB12A,ZFAND2B,CACUL1
4_Member	GO Biological Processes	GO:0072524	pyridine-containing compound metabolic process	-3.76903	-1.5227	24/196	2820,3417,3607,5208,5209,5562,6396,6888,8021,8514,8564,8604,10762,11277,11319,53371,55276,64080,79023,81929,83594,83666,133686,339123	GPD2,IDH1,FOXK2,PFKFB2,PFKFB3,PRKAA1,SEC13,TALDO1,NUP214,KCNAB2,KMO,SLC25A12,NUP50,TREX1,ECD,NUP54,PGM2,RBKS,NUP37,SEH1L,NUDT12,PARP9,NADK2,JMJD8
14_Member	GO Biological Processes	GO:0043632	modification-dependent macromolecule catabolic process	-3.75032	-1.51125	57/640	369,1452,1453,1950,4085,4287,5371,5527,5699,5706,5708,5711,5715,5719,6815,7318,7319,7321,7324,7328,7341,7375,7466,8405,8945,9097,9354,9575,9960,10197,10213,10221,10277,10869,10956,11267,23198,23321,25827,25898,27005,51283,54850,55048,55212,55230,55658,57563,57695,64777,79089,84669,89910,90864,93343,130617,143384	ARAF,CSNK1A1,CSNK1D,EGF,MAD2L1,ATXN3,PML,PPP2R5C,PSMB10,PSMC6,PSMD2,PSMD5,PSMD9,PSMD13,STYX,UBA7,UBE2A,UBE2D1,UBE2E1,UBE2H,SUMO1,USP4,WFS1,SPOP,BTRC,USP14,UBE4A,CLOCK,USP3,PSME3,PSMD14,TRIB1,UBE4B,USP19,OS9,SNF8,PSME4,TRIM2,FBXL2,RCHY1,USP21,BFAR,FBXL12,VPS37C,BBS7,USP40,RNF126,KLHL8,USP37,RMND5B,TMUB2,USP32,UBE3B,SPSB3,MVB12A,ZFAND2B,CACUL1
4_Member	GO Biological Processes	GO:0051196	regulation of coenzyme metabolic process	-3.74697	-1.51125	15/95	2954,5208,5209,5562,6396,8021,8604,10762,11277,11319,53371,55066,79023,81929,339123	GSTZ1,PFKFB2,PFKFB3,PRKAA1,SEC13,NUP214,SLC25A12,NUP50,TREX1,ECD,NUP54,PDPR,NUP37,SEH1L,JMJD8
8_Member	GO Biological Processes	GO:0016579	protein deubiquitination	-3.74217	-1.51125	31/284	367,672,3607,4287,5699,5706,5708,5711,5715,5719,7321,7375,8517,8665,9097,9733,9738,9960,10197,10213,10869,23198,27005,54629,55230,55793,57695,84669,91833,114785,114803	AR,BRCA1,FOXK2,ATXN3,PSMB10,PSMC6,PSMD2,PSMD5,PSMD9,PSMD13,UBE2D1,USP4,IKBKG,EIF3F,USP14,SART3,CCP110,USP3,PSME3,PSMD14,USP19,PSME4,USP21,MINDY2,USP40,MINDY1,USP37,USP32,WDR20,MBD6,MYSM1
4_Member	GO Biological Processes	GO:0009123	nucleoside monophosphate metabolic process	-3.73846	-1.51125	38/376	158,204,272,353,498,516,572,2618,3607,4706,4707,4714,4718,5208,5209,5562,5634,6389,6396,6470,7371,8021,8505,8604,10059,10762,11277,11319,23479,29789,51103,53371,56848,64077,79023,79736,81929,339123	ADSL,AK2,AMPD3,APRT,ATP5F1A,ATP5MC1,BAD,GART,FOXK2,NDUFAB1,NDUFB1,NDUFB8,NDUFC2,PFKFB2,PFKFB3,PRKAA1,PRPS2,SDHA,SEC13,SHMT1,UCK2,NUP214,PARG,SLC25A12,DNM1L,NUP50,TREX1,ECD,ISCU,OLA1,NDUFAF1,NUP54,SPHK2,LHPP,NUP37,TEFM,SEH1L,JMJD8
8_Member	GO Biological Processes	GO:1901532	regulation of hematopoietic progenitor cell differentiation	-3.7341	-1.51125	14/85	4297,5699,5706,5708,5711,5715,5719,6929,7161,10197,10213,23198,51441,96459	KMT2A,PSMB10,PSMC6,PSMD2,PSMD5,PSMD9,PSMD13,TCF3,TP73,PSME3,PSMD14,PSME4,YTHDF2,FNIP1
16_Member	GO Biological Processes	GO:0030488	tRNA methylation	-3.71446	-1.49615	9/39	6894,9692,9836,25821,51605,80745,84705,91801,158234	TARBP1,PRORP,LCMT2,MTO1,TRMT6,THUMPD2,GTPBP3,ALKBH8,TRMT10B
18_Summary	GO Biological Processes	GO:0030029	actin filament-based process	-3.6882	-1.47761	65/760	87,596,604,817,2036,2059,2764,3092,3551,3845,3984,4287,4690,4763,5142,5170,5217,5318,5345,5357,5584,5592,5756,5910,6324,6525,7168,7341,7456,8837,9266,9578,9788,10006,10458,10486,11252,22808,23092,23096,23242,23406,27289,29085,54822,54828,54874,55160,57175,64857,79778,80179,84062,85458,85464,91663,93627,122786,130271,133522,147179,253725,261734,388591,399687	ACTN1,BCL2,BCL6,CAMK2D,EPB41L1,EPS8,GMFB,HIP1,IKBKB,KRAS,LIMK1,ATXN3,NCK1,NF1,PDE4B,PDPK1,PFN2,PKP2,SERPINF2,PLS1,PRKCI,PRKG1,TWF1,RAP1GDS1,SCN1B,SMTN,TPM1,SUMO1,WIPF1,CFLAR,CYTH2,CDC42BPB,MTSS1,ABI1,BAIAP2,CAP2,PACSIN2,MRAS,ARHGAP26,IQSEC2,COBL,COTL1,RND1,PHPT1,TRPM7,BCAS3,FNBP1L,ARHGEF10L,CORO1B,PLEKHG2,MICALL2,MYO19,DTNBP1,DIXDC1,SSH2,MYADM,TBCK,FRMD6,PLEKHH2,PPARGC1B,WIPF2,WASHC2C,NPHP4,RNF20…
18_Member	GO Biological Processes	GO:0030029	actin filament-based process	-3.6882	-1.47761	65/760	87,596,604,817,2036,2059,2764,3092,3551,3845,3984,4287,4690,4763,5142,5170,5217,5318,5345,5357,5584,5592,5756,5910,6324,6525,7168,7341,7456,8837,9266,9578,9788,10006,10458,10486,11252,22808,23092,23096,23242,23406,27289,29085,54822,54828,54874,55160,57175,64857,79778,80179,84062,85458,85464,91663,93627,122786,130271,133522,147179,253725,261734,388591,399687	ACTN1,BCL2,BCL6,CAMK2D,EPB41L1,EPS8,GMFB,HIP1,IKBKB,KRAS,LIMK1,ATXN3,NCK1,NF1,PDE4B,PDPK1,PFN2,PKP2,SERPINF2,PLS1,PRKCI,PRKG1,TWF1,RAP1GDS1,SCN1B,SMTN,TPM1,SUMO1,WIPF1,CFLAR,CYTH2,CDC42BPB,MTSS1,ABI1,BAIAP2,CAP2,PACSIN2,MRAS,ARHGAP26,IQSEC2,COBL,COTL1,RND1,PHPT1,TRPM7,BCAS3,FNBP1L,ARHGEF10L,CORO1B,PLEKHG2,MICALL2,MYO19,DTNBP1,DIXDC1,SSH2,MYADM,TBCK,FRMD6,PLEKHH2,PPARGC1B,WIPF2,WASHC2C,NPHP4,RNF20…
4_Member	GO Biological Processes	GO:0009259	ribonucleotide metabolic process	-3.68511	-1.47761	51/558	111,158,204,272,353,498,516,572,2618,2954,3607,4706,4707,4714,4718,4832,5141,5142,5208,5209,5562,6389,6396,6817,7371,8021,8505,8604,8803,9054,9374,10005,10059,10762,11277,11319,23479,29789,51103,51144,53371,55066,56848,64087,64834,79023,79621,79736,80347,81929,339123	ADCY5,ADSL,AK2,AMPD3,APRT,ATP5F1A,ATP5MC1,BAD,GART,GSTZ1,FOXK2,NDUFAB1,NDUFB1,NDUFB8,NDUFC2,NME3,PDE4A,PDE4B,PFKFB2,PFKFB3,PRKAA1,SDHA,SEC13,SULT1A1,UCK2,NUP214,PARG,SLC25A12,SUCLA2,NFS1,PPT2,ACOT8,DNM1L,NUP50,TREX1,ECD,ISCU,OLA1,NDUFAF1,HSD17B12,NUP54,PDPR,SPHK2,MCCC2,ELOVL1,NUP37,RNASEH2B,TEFM,COASY,SEH1L,JMJD8
16_Member	GO Biological Processes	GO:0006400	tRNA modification	-3.67888	-1.47761	14/86	6894,9692,9836,25821,51605,55644,57505,64118,80745,84705,91801,129450,158234,285381	TARBP1,PRORP,LCMT2,MTO1,TRMT6,OSGEP,AARS2,DUS1L,THUMPD2,GTPBP3,ALKBH8,TYW5,TRMT10B,DPH3
16_Member	GO Biological Processes	GO:0009451	RNA modification	-3.67819	-1.47761	21/163	6894,8731,9582,9692,9836,25821,51605,55178,55644,55651,55695,57505,64118,80745,84705,91801,129450,130916,158234,260294,285381	TARBP1,RNMT,APOBEC3B,PRORP,LCMT2,MTO1,TRMT6,MRM3,OSGEP,NHP2,NSUN5,AARS2,DUS1L,THUMPD2,GTPBP3,ALKBH8,TYW5,MTERF4,TRMT10B,NSUN5P2,DPH3
4_Member	GO Biological Processes	GO:0009108	coenzyme biosynthetic process	-3.67164	-1.47736	29/261	2232,2618,2954,3607,4522,5092,5208,5209,5562,5860,6396,8021,8564,9054,9374,10762,11277,11319,51144,53371,55066,64834,79023,80347,81929,83594,83666,133686,339123	FDXR,GART,GSTZ1,FOXK2,MTHFD1,PCBD1,PFKFB2,PFKFB3,PRKAA1,QDPR,SEC13,NUP214,KMO,NFS1,PPT2,NUP50,TREX1,ECD,HSD17B12,NUP54,PDPR,ELOVL1,NUP37,COASY,SEH1L,NUDT12,PARP9,NADK2,JMJD8
4_Member	GO Biological Processes	GO:0016052	carbohydrate catabolic process	-3.66813	-1.47736	24/199	572,2592,2820,3607,3795,5208,5209,5562,6396,8021,8604,10762,11277,11319,26007,53371,55276,55347,64080,79023,81929,84750,339123,414328	BAD,GALT,GPD2,FOXK2,KHK,PFKFB2,PFKFB3,PRKAA1,SEC13,NUP214,SLC25A12,NUP50,TREX1,ECD,TKFC,NUP54,PGM2,ABHD10,RBKS,NUP37,SEH1L,FUT10,JMJD8,IDNK
19_Summary	GO Biological Processes	GO:0007005	mitochondrion organization	-3.66151	-1.47736	49/531	498,516,572,596,1981,2011,2553,2730,4706,4707,4714,4718,5562,7156,7159,7161,7249,8834,9093,9474,9776,9927,10059,26100,27429,28976,29090,51103,51300,54471,55572,55744,57505,65084,79736,79778,80179,83943,84303,84902,89781,90427,91137,96459,130916,131118,132671,201973,401505,3417,4763,5189,5190,5371,5569,5824,6171,6203,7321,8021,8546,9179,9555,9765,10005,10694,10762,10856,10901,11267,23514,23600,257…	ATP5F1A,ATP5MC1,BAD,BCL2,EIF4G1,MARK2,GABPB1,GCLM,NDUFAB1,NDUFB1,NDUFB8,NDUFC2,PRKAA1,TOP3A,TP53BP2,TP73,TSC2,TMEM11,DNAJA3,ATG5,ATG13,MFN2,DNM1L,WIPI2,HTRA2,ACAD9,TIMM21,NDUFAF1,TIMMDC1,MIEF1,FOXRED1,COA1,AARS2,TMEM135,TEFM,MICALL2,MYO19,IMMP2L,CHCHD6,CEP89,HPS4,BMF,SLC25A46,FNIP1,MTERF4,DNAJC19,SPATA18,PRIMPOL,TOMM5,IDH1,NF1,PEX1,PEX6,PML,PKIA,PEX19,RPL41,RPS9,UBE2D1,NUP214,AP3B1,AP4M1,MACROH2A…
19_Member	GO Biological Processes	GO:0007005	mitochondrion organization	-3.66151	-1.47736	49/531	498,516,572,596,1981,2011,2553,2730,4706,4707,4714,4718,5562,7156,7159,7161,7249,8834,9093,9474,9776,9927,10059,26100,27429,28976,29090,51103,51300,54471,55572,55744,57505,65084,79736,79778,80179,83943,84303,84902,89781,90427,91137,96459,130916,131118,132671,201973,401505	ATP5F1A,ATP5MC1,BAD,BCL2,EIF4G1,MARK2,GABPB1,GCLM,NDUFAB1,NDUFB1,NDUFB8,NDUFC2,PRKAA1,TOP3A,TP53BP2,TP73,TSC2,TMEM11,DNAJA3,ATG5,ATG13,MFN2,DNM1L,WIPI2,HTRA2,ACAD9,TIMM21,NDUFAF1,TIMMDC1,MIEF1,FOXRED1,COA1,AARS2,TMEM135,TEFM,MICALL2,MYO19,IMMP2L,CHCHD6,CEP89,HPS4,BMF,SLC25A46,FNIP1,MTERF4,DNAJC19,SPATA18,PRIMPOL,TOMM5
4_Member	GO Biological Processes	GO:0046390	ribose phosphate biosynthetic process	-3.65926	-1.47736	32/300	111,158,204,272,353,498,516,2618,2954,3607,4832,5208,5209,5562,5634,6396,7371,8021,8604,9374,10762,11277,11319,51144,53371,55066,56848,64834,79023,80347,81929,339123	ADCY5,ADSL,AK2,AMPD3,APRT,ATP5F1A,ATP5MC1,GART,GSTZ1,FOXK2,NME3,PFKFB2,PFKFB3,PRKAA1,PRPS2,SEC13,UCK2,NUP214,SLC25A12,PPT2,NUP50,TREX1,ECD,HSD17B12,NUP54,PDPR,SPHK2,ELOVL1,NUP37,COASY,SEH1L,JMJD8
14_Member	GO Biological Processes	GO:0051603	proteolysis involved in cellular protein catabolic process	-3.65675	-1.47736	62/718	369,1452,1453,1508,1950,4085,4287,5371,5527,5699,5706,5708,5711,5715,5719,6815,7318,7319,7321,7324,7328,7341,7375,7466,8405,8945,9097,9354,9575,9960,10197,10213,10221,10277,10869,10956,11267,23198,23321,25827,25898,27005,51283,54850,55048,55212,55230,55658,57563,57695,64777,79089,80700,81792,84669,89910,90864,93343,130617,143384,160418,337867	ARAF,CSNK1A1,CSNK1D,CTSB,EGF,MAD2L1,ATXN3,PML,PPP2R5C,PSMB10,PSMC6,PSMD2,PSMD5,PSMD9,PSMD13,STYX,UBA7,UBE2A,UBE2D1,UBE2E1,UBE2H,SUMO1,USP4,WFS1,SPOP,BTRC,USP14,UBE4A,CLOCK,USP3,PSME3,PSMD14,TRIB1,UBE4B,USP19,OS9,SNF8,PSME4,TRIM2,FBXL2,RCHY1,USP21,BFAR,FBXL12,VPS37C,BBS7,USP40,RNF126,KLHL8,USP37,RMND5B,TMUB2,UBXN6,ADAMTS12,USP32,UBE3B,SPSB3,MVB12A,ZFAND2B,CACUL1,TMTC3,UBAC2
4_Member	GO Biological Processes	GO:0009167	purine ribonucleoside monophosphate metabolic process	-3.61922	-1.444	35/341	158,204,272,353,498,516,572,2618,3607,4706,4707,4714,4718,5208,5209,5562,6389,6396,8021,8505,8604,10059,10762,11277,11319,23479,29789,51103,53371,56848,64077,79023,79736,81929,339123	ADSL,AK2,AMPD3,APRT,ATP5F1A,ATP5MC1,BAD,GART,FOXK2,NDUFAB1,NDUFB1,NDUFB8,NDUFC2,PFKFB2,PFKFB3,PRKAA1,SDHA,SEC13,NUP214,PARG,SLC25A12,DNM1L,NUP50,TREX1,ECD,ISCU,OLA1,NDUFAF1,NUP54,SPHK2,LHPP,NUP37,TEFM,SEH1L,JMJD8
4_Member	GO Biological Processes	GO:0006163	purine nucleotide metabolic process	-3.61519	-1.444	52/576	111,158,204,272,353,498,516,572,2618,2954,3607,4522,4706,4707,4714,4718,4832,5141,5142,5208,5209,5562,5634,6389,6396,6817,8021,8505,8604,8803,9054,9374,10005,10059,10762,11277,11319,23479,29789,51103,51144,53371,55066,56848,64087,64834,79023,79736,80347,81929,339123,441024	ADCY5,ADSL,AK2,AMPD3,APRT,ATP5F1A,ATP5MC1,BAD,GART,GSTZ1,FOXK2,MTHFD1,NDUFAB1,NDUFB1,NDUFB8,NDUFC2,NME3,PDE4A,PDE4B,PFKFB2,PFKFB3,PRKAA1,PRPS2,SDHA,SEC13,SULT1A1,NUP214,PARG,SLC25A12,SUCLA2,NFS1,PPT2,ACOT8,DNM1L,NUP50,TREX1,ECD,ISCU,OLA1,NDUFAF1,HSD17B12,NUP54,PDPR,SPHK2,MCCC2,ELOVL1,NUP37,TEFM,COASY,SEH1L,JMJD8,MTHFD2L
4_Member	GO Biological Processes	GO:0009126	purine nucleoside monophosphate metabolic process	-3.59504	-1.42789	35/342	158,204,272,353,498,516,572,2618,3607,4706,4707,4714,4718,5208,5209,5562,6389,6396,8021,8505,8604,10059,10762,11277,11319,23479,29789,51103,53371,56848,64077,79023,79736,81929,339123	ADSL,AK2,AMPD3,APRT,ATP5F1A,ATP5MC1,BAD,GART,FOXK2,NDUFAB1,NDUFB1,NDUFB8,NDUFC2,PFKFB2,PFKFB3,PRKAA1,SDHA,SEC13,NUP214,PARG,SLC25A12,DNM1L,NUP50,TREX1,ECD,ISCU,OLA1,NDUFAF1,NUP54,SPHK2,LHPP,NUP37,TEFM,SEH1L,JMJD8
7_Member	GO Biological Processes	GO:0043087	regulation of GTPase activity	-3.58204	-1.41889	45/479	141,604,663,1793,1856,2664,2889,3987,4763,5592,5910,5998,6251,6347,6494,7249,9135,9610,9743,9905,10059,10483,10762,23092,23129,23143,23161,23216,23232,25782,26286,27352,51291,51306,54662,54828,55160,57706,81704,81846,83874,93627,132864,255520,259173	ADPRH,BCL6,BNIP2,DOCK1,DVL2,GDI1,RAPGEF1,LIMS1,NF1,PRKG1,RAP1GDS1,RGS3,RSU1,CCL2,SIPA1,TSC2,RABEP1,RIN1,ARHGAP32,SGSM2,DNM1L,SEC23B,NUP50,ARHGAP26,PLXND1,LRCH1,SNX13,TBC1D1,TBC1D12,RAB3GAP2,ARFGAP3,SGSM3,GMIP,FAM13B,TBC1D13,BCAS3,ARHGEF10L,DENND1A,DOCK8,SBF2,TBC1D10A,TBCK,CPEB2,ELMOD2,ALS2CL
8_Member	GO Biological Processes	GO:0050852	T cell receptor signaling pathway	-3.56987	-1.41424	24/202	975,1997,2633,3551,3783,3958,4690,4790,5142,5170,5699,5706,5708,5711,5715,5719,8517,8945,10197,10213,23118,23198,25865,29085	CD81,ELF1,GBP1,IKBKB,KCNN4,LGALS3,NCK1,NFKB1,PDE4B,PDPK1,PSMB10,PSMC6,PSMD2,PSMD5,PSMD9,PSMD13,IKBKG,BTRC,PSME3,PSMD14,TAB2,PSME4,PRKD2,PHPT1
20_Summary	GO Biological Processes	GO:0034497	protein localization to phagophore assembly site	-3.56949	-1.41424	5/12	5289,9776,9927,23241,26100,5595,7249,9474,23001,27429,51368,2011,10059,132671	PIK3C3,ATG13,MFN2,PACS2,WIPI2,MAPK3,TSC2,ATG5,WDFY3,HTRA2,TEX264,MARK2,DNM1L,SPATA18
20_Member	GO Biological Processes	GO:0034497	protein localization to phagophore assembly site	-3.56949	-1.41424	5/12	5289,9776,9927,23241,26100	PIK3C3,ATG13,MFN2,PACS2,WIPI2
4_Member	GO Biological Processes	GO:0009260	ribonucleotide biosynthetic process	-3.50244	-1.36238	31/293	111,158,204,272,353,498,516,2618,2954,3607,4832,5208,5209,5562,6396,7371,8021,8604,9374,10762,11277,11319,51144,53371,55066,56848,64834,79023,80347,81929,339123	ADCY5,ADSL,AK2,AMPD3,APRT,ATP5F1A,ATP5MC1,GART,GSTZ1,FOXK2,NME3,PFKFB2,PFKFB3,PRKAA1,SEC13,UCK2,NUP214,SLC25A12,PPT2,NUP50,TREX1,ECD,HSD17B12,NUP54,PDPR,SPHK2,ELOVL1,NUP37,COASY,SEH1L,JMJD8
4_Member	GO Biological Processes	GO:0009152	purine ribonucleotide biosynthetic process	-3.50226	-1.36238	30/280	111,158,204,272,353,498,516,2618,2954,3607,4832,5208,5209,5562,6396,8021,8604,9374,10762,11277,11319,51144,53371,55066,56848,64834,79023,80347,81929,339123	ADCY5,ADSL,AK2,AMPD3,APRT,ATP5F1A,ATP5MC1,GART,GSTZ1,FOXK2,NME3,PFKFB2,PFKFB3,PRKAA1,SEC13,NUP214,SLC25A12,PPT2,NUP50,TREX1,ECD,HSD17B12,NUP54,PDPR,SPHK2,ELOVL1,NUP37,COASY,SEH1L,JMJD8
16_Member	GO Biological Processes	GO:0006399	tRNA metabolic process	-3.46553	-1.33314	23/193	1615,2058,2193,5188,6894,9097,9692,9836,10352,10978,25821,51605,55644,57505,64118,80745,84705,91801,124454,129450,158234,283989,285381	DARS1,EPRS,FARSA,GATB,TARBP1,USP14,PRORP,LCMT2,WARS2,CLP1,MTO1,TRMT6,OSGEP,AARS2,DUS1L,THUMPD2,GTPBP3,ALKBH8,EARS2,TYW5,TRMT10B,TSEN54,DPH3
4_Member	GO Biological Processes	GO:0009150	purine ribonucleotide metabolic process	-3.43758	-1.31255	49/543	111,158,204,272,353,498,516,572,2618,2954,3607,4706,4707,4714,4718,4832,5141,5142,5208,5209,5562,6389,6396,6817,8021,8505,8604,8803,9054,9374,10005,10059,10762,11277,11319,23479,29789,51103,51144,53371,55066,56848,64087,64834,79023,79736,80347,81929,339123	ADCY5,ADSL,AK2,AMPD3,APRT,ATP5F1A,ATP5MC1,BAD,GART,GSTZ1,FOXK2,NDUFAB1,NDUFB1,NDUFB8,NDUFC2,NME3,PDE4A,PDE4B,PFKFB2,PFKFB3,PRKAA1,SDHA,SEC13,SULT1A1,NUP214,PARG,SLC25A12,SUCLA2,NFS1,PPT2,ACOT8,DNM1L,NUP50,TREX1,ECD,ISCU,OLA1,NDUFAF1,HSD17B12,NUP54,PDPR,SPHK2,MCCC2,ELOVL1,NUP37,TEFM,COASY,SEH1L,JMJD8
8_Member	GO Biological Processes	GO:0002223	stimulatory C-type lectin receptor signaling pathway	-3.3987	-1.28058	16/113	3551,3845,4790,5170,5699,5706,5708,5711,5715,5719,8517,8945,10197,10213,23118,23198	IKBKB,KRAS,NFKB1,PDPK1,PSMB10,PSMC6,PSMD2,PSMD5,PSMD9,PSMD13,IKBKG,BTRC,PSME3,PSMD14,TAB2,PSME4
4_Member	GO Biological Processes	GO:0030811	regulation of nucleotide catabolic process	-3.3954	-1.28058	13/81	5208,5209,5562,6396,8021,8604,10762,11277,11319,53371,79023,81929,339123	PFKFB2,PFKFB3,PRKAA1,SEC13,NUP214,SLC25A12,NUP50,TREX1,ECD,NUP54,NUP37,SEH1L,JMJD8
7_Member	GO Biological Processes	GO:0043547	positive regulation of GTPase activity	-3.39479	-1.28058	39/405	141,663,1793,1856,2664,2889,3987,4763,5910,5998,6251,6347,6494,7249,9135,9610,9743,9905,10059,10483,10762,23092,23161,23216,23232,25782,26286,27352,51291,51306,54662,54828,55160,57706,81704,83874,93627,255520,259173	ADPRH,BNIP2,DOCK1,DVL2,GDI1,RAPGEF1,LIMS1,NF1,RAP1GDS1,RGS3,RSU1,CCL2,SIPA1,TSC2,RABEP1,RIN1,ARHGAP32,SGSM2,DNM1L,SEC23B,NUP50,ARHGAP26,SNX13,TBC1D1,TBC1D12,RAB3GAP2,ARFGAP3,SGSM3,GMIP,FAM13B,TBC1D13,BCAS3,ARHGEF10L,DENND1A,DOCK8,TBC1D10A,TBCK,ELMOD2,ALS2CL
8_Member	GO Biological Processes	GO:0030111	regulation of Wnt signaling pathway	-3.35093	-1.24026	36/366	1277,1452,1453,1456,1856,1950,2889,3675,4300,4790,5204,5699,5706,5708,5711,5715,5719,6934,7089,7090,7091,7249,8945,10076,10197,10213,10856,23198,23213,51366,53944,57560,64897,85458,90410,261734	COL1A1,CSNK1A1,CSNK1D,CSNK1G3,DVL2,EGF,RAPGEF1,ITGA3,MLLT3,NFKB1,PFDN5,PSMB10,PSMC6,PSMD2,PSMD5,PSMD9,PSMD13,TCF7L2,TLE2,TLE3,TLE4,TSC2,BTRC,PTPRU,PSME3,PSMD14,RUVBL2,PSME4,SULF1,UBR5,CSNK1G1,IFT80,C12orf43,DIXDC1,IFT20,NPHP4
8_Member	GO Biological Processes	GO:0060828	regulation of canonical Wnt signaling pathway	-3.34644	-1.23928	30/286	1277,1452,1453,1456,1856,1950,2889,4300,4790,5204,5699,5706,5708,5711,5715,5719,6934,7089,7090,7091,8945,10076,10197,10213,10856,23198,51366,53944,90410,261734	COL1A1,CSNK1A1,CSNK1D,CSNK1G3,DVL2,EGF,RAPGEF1,MLLT3,NFKB1,PFDN5,PSMB10,PSMC6,PSMD2,PSMD5,PSMD9,PSMD13,TCF7L2,TLE2,TLE3,TLE4,BTRC,PTPRU,PSME3,PSMD14,RUVBL2,PSME4,UBR5,CSNK1G1,IFT20,NPHP4
19_Member	GO Biological Processes	GO:0072594	establishment of protein localization to organelle	-3.32987	-1.22748	49/549	572,596,3417,4763,5189,5190,5371,5562,5569,5824,6171,6203,7159,7161,7249,7321,8021,8546,9179,9555,9765,9776,9927,10005,10694,10762,10856,10901,11267,23514,23600,25782,27429,29090,51366,53371,55048,55670,55764,64901,79711,79778,83943,89781,90427,130617,130916,131118,401505	BAD,BCL2,IDH1,NF1,PEX1,PEX6,PML,PRKAA1,PKIA,PEX19,RPL41,RPS9,TP53BP2,TP73,TSC2,UBE2D1,NUP214,AP3B1,AP4M1,MACROH2A1,ZFYVE16,ATG13,MFN2,ACOT8,CCT8,NUP50,RUVBL2,DHRS4,SNF8,SPIDR,AMACR,RAB3GAP2,HTRA2,TIMM21,UBR5,NUP54,VPS37C,PEX26,IFT122,RANBP17,IPO4,MICALL2,IMMP2L,HPS4,BMF,ZFAND2B,MTERF4,DNAJC19,TOMM5
4_Member	GO Biological Processes	GO:0046031	ADP metabolic process	-3.32365	-1.22688	17/126	204,272,572,3607,5208,5209,5562,6396,8021,8604,10762,11277,11319,53371,79023,81929,339123	AK2,AMPD3,BAD,FOXK2,PFKFB2,PFKFB3,PRKAA1,SEC13,NUP214,SLC25A12,NUP50,TREX1,ECD,NUP54,NUP37,SEH1L,JMJD8
9_Member	GO Biological Processes	GO:0000387	spliceosomal snRNP assembly	-3.30465	-1.21396	10/53	6606,6635,7375,8487,9092,9733,11171,11218,50628,54496	SMN1,SNRPE,USP4,GEMIN2,SART1,SART3,STRAP,DDX20,GEMIN4,PRMT7
4_Member	GO Biological Processes	GO:0009199	ribonucleoside triphosphate metabolic process	-3.30395	-1.21396	34/341	204,272,498,516,572,3607,4706,4707,4714,4718,4832,5208,5209,5562,6389,6396,7371,8021,8505,8604,9054,10059,10762,11277,11319,23479,29789,51103,53371,56848,79023,79736,81929,339123	AK2,AMPD3,ATP5F1A,ATP5MC1,BAD,FOXK2,NDUFAB1,NDUFB1,NDUFB8,NDUFC2,NME3,PFKFB2,PFKFB3,PRKAA1,SDHA,SEC13,UCK2,NUP214,PARG,SLC25A12,NFS1,DNM1L,NUP50,TREX1,ECD,ISCU,OLA1,NDUFAF1,NUP54,SPHK2,NUP37,TEFM,SEH1L,JMJD8
18_Member	GO Biological Processes	GO:0030036	actin cytoskeleton organization	-3.29916	-1.21253	57/667	87,596,604,2036,2059,2764,3092,3551,3845,3984,4287,4690,4763,5170,5217,5345,5357,5584,5592,5756,5910,6525,7168,7456,8837,9266,9578,9788,10006,10458,10486,11252,22808,23092,23096,23242,23406,27289,29085,54822,54828,55160,57175,64857,79778,84062,85458,85464,91663,93627,122786,130271,133522,147179,253725,261734,399687	ACTN1,BCL2,BCL6,EPB41L1,EPS8,GMFB,HIP1,IKBKB,KRAS,LIMK1,ATXN3,NCK1,NF1,PDPK1,PFN2,SERPINF2,PLS1,PRKCI,PRKG1,TWF1,RAP1GDS1,SMTN,TPM1,WIPF1,CFLAR,CYTH2,CDC42BPB,MTSS1,ABI1,BAIAP2,CAP2,PACSIN2,MRAS,ARHGAP26,IQSEC2,COBL,COTL1,RND1,PHPT1,TRPM7,BCAS3,ARHGEF10L,CORO1B,PLEKHG2,MICALL2,DTNBP1,DIXDC1,SSH2,MYADM,TBCK,FRMD6,PLEKHH2,PPARGC1B,WIPF2,WASHC2C,NPHP4,MYO18A
8_Member	GO Biological Processes	GO:0060218	hematopoietic stem cell differentiation	-3.29004	-1.20674	13/83	4297,5699,5706,5708,5711,5715,5719,6929,7161,10197,10213,23198,51441	KMT2A,PSMB10,PSMC6,PSMD2,PSMD5,PSMD9,PSMD13,TCF3,TP73,PSME3,PSMD14,PSME4,YTHDF2
8_Member	GO Biological Processes	GO:0002220	innate immune response activating cell surface receptor signaling pathway	-3.26965	-1.19292	16/116	3551,3845,4790,5170,5699,5706,5708,5711,5715,5719,8517,8945,10197,10213,23118,23198	IKBKB,KRAS,NFKB1,PDPK1,PSMB10,PSMC6,PSMD2,PSMD5,PSMD9,PSMD13,IKBKG,BTRC,PSME3,PSMD14,TAB2,PSME4
8_Member	GO Biological Processes	GO:0030178	negative regulation of Wnt signaling pathway	-3.23091	-1.15988	24/213	1452,1856,2889,4300,5204,5699,5706,5708,5711,5715,5719,6934,7089,7090,7091,7249,10076,10197,10213,10856,23198,57560,64897,261734	CSNK1A1,DVL2,RAPGEF1,MLLT3,PFDN5,PSMB10,PSMC6,PSMD2,PSMD5,PSMD9,PSMD13,TCF7L2,TLE2,TLE3,TLE4,TSC2,PTPRU,PSME3,PSMD14,RUVBL2,PSME4,IFT80,C12orf43,NPHP4
4_Member	GO Biological Processes	GO:1900371	regulation of purine nucleotide biosynthetic process	-3.22782	-1.15988	16/117	2954,5208,5209,5562,6396,8021,8604,10762,11277,11319,53371,55066,56848,79023,81929,339123	GSTZ1,PFKFB2,PFKFB3,PRKAA1,SEC13,NUP214,SLC25A12,NUP50,TREX1,ECD,NUP54,PDPR,SPHK2,NUP37,SEH1L,JMJD8
4_Member	GO Biological Processes	GO:0046034	ATP metabolic process	-3.20437	-1.1468	31/305	204,272,498,516,572,3607,4706,4707,4714,4718,5208,5209,5562,6389,6396,8021,8505,8604,10059,10762,11277,11319,23479,29789,51103,53371,56848,79023,79736,81929,339123	AK2,AMPD3,ATP5F1A,ATP5MC1,BAD,FOXK2,NDUFAB1,NDUFB1,NDUFB8,NDUFC2,PFKFB2,PFKFB3,PRKAA1,SDHA,SEC13,NUP214,PARG,SLC25A12,DNM1L,NUP50,TREX1,ECD,ISCU,OLA1,NDUFAF1,NUP54,SPHK2,NUP37,TEFM,SEH1L,JMJD8
1_Member	GO Biological Processes	GO:0016072	rRNA metabolic process	-3.18669	-1.14133	27/253	4931,6203,8945,9092,9326,9555,10360,10438,11103,23517,27340,50628,51202,54512,55164,55178,55636,55651,55695,57062,57647,64963,79954,84135,130916,134430,260294	NVL,RPS9,BTRC,SART1,ZNHIT3,MACROH2A1,NPM3,C1D,KRR1,MTREX,UTP20,GEMIN4,DDX47,EXOSC4,SHQ1,MRM3,CHD7,NHP2,NSUN5,DDX24,DHX37,MRPS11,NOL10,UTP15,MTERF4,WDR36,NSUN5P2
4_Member	GO Biological Processes	GO:0030808	regulation of nucleotide biosynthetic process	-3.18657	-1.14133	16/118	2954,5208,5209,5562,6396,8021,8604,10762,11277,11319,53371,55066,56848,79023,81929,339123	GSTZ1,PFKFB2,PFKFB3,PRKAA1,SEC13,NUP214,SLC25A12,NUP50,TREX1,ECD,NUP54,PDPR,SPHK2,NUP37,SEH1L,JMJD8
8_Member	GO Biological Processes	GO:2000736	regulation of stem cell differentiation	-3.18657	-1.14133	16/118	2627,2668,4297,5699,5706,5708,5711,5715,5719,6929,7161,10197,10213,23198,51441,221662	GATA6,GDNF,KMT2A,PSMB10,PSMC6,PSMD2,PSMD5,PSMD9,PSMD13,TCF3,TP73,PSME3,PSMD14,PSME4,YTHDF2,RBM24
12_Member	GO Biological Processes	GO:0007017	microtubule-based process	-3.17828	-1.13663	63/764	636,672,1058,1111,1453,2009,2011,2258,4085,4134,4287,4296,5108,5189,5562,5590,6421,6491,6566,6651,6867,8045,8481,8546,8636,9738,10126,10274,10783,22995,23095,23354,25886,26005,26140,26973,28981,28989,29105,29911,51361,54462,54820,54828,54908,55125,55764,56288,57560,57787,79598,79929,84062,84617,84942,85458,90410,116840,124093,127602,153241,157922,284403	BICD1,BRCA1,CENPA,CHEK1,CSNK1D,EML1,MARK2,FGF13,MAD2L1,MAP4,ATXN3,MAP3K11,PCM1,PEX1,PRKAA1,PRKCZ,SFPQ,STIL,SLC16A1,SON,TACC1,RASSF7,OFD1,AP3B1,SSNA1,CCP110,DNAL4,STAG1,NEK6,CEP152,KIF1B,HAUS5,POC1A,C2CD3,TTLL3,CHORDC1,IFT81,NTMT1,CFAP20,HOOK2,HOOK1,CCSER2,NDE1,BCAS3,SPDL1,CEP192,IFT122,PARD3,IFT80,MARK4,CEP97,MAP6D1,DTNBP1,TUBB6,WDR73,DIXDC1,IFT20,CNTROB,CCDC78,DNAH14,CEP120,CAMSAP1,WDR62
4_Member	GO Biological Processes	GO:2001169	regulation of ATP biosynthetic process	-3.17584	-1.13663	14/96	5208,5209,5562,6396,8021,8604,10762,11277,11319,53371,56848,79023,81929,339123	PFKFB2,PFKFB3,PRKAA1,SEC13,NUP214,SLC25A12,NUP50,TREX1,ECD,NUP54,SPHK2,NUP37,SEH1L,JMJD8
16_Member	GO Biological Processes	GO:0008033	tRNA processing	-3.16553	-1.1293	17/130	6894,9097,9692,9836,10978,25821,51605,55644,57505,64118,80745,84705,91801,129450,158234,283989,285381	TARBP1,USP14,PRORP,LCMT2,CLP1,MTO1,TRMT6,OSGEP,AARS2,DUS1L,THUMPD2,GTPBP3,ALKBH8,TYW5,TRMT10B,TSEN54,DPH3
8_Member	GO Biological Processes	GO:0090090	negative regulation of canonical Wnt signaling pathway	-3.159	-1.12574	21/178	1452,1856,2889,4300,5204,5699,5706,5708,5711,5715,5719,6934,7089,7090,7091,10076,10197,10213,10856,23198,261734	CSNK1A1,DVL2,RAPGEF1,MLLT3,PFDN5,PSMB10,PSMC6,PSMD2,PSMD5,PSMD9,PSMD13,TCF7L2,TLE2,TLE3,TLE4,PTPRU,PSME3,PSMD14,RUVBL2,PSME4,NPHP4
4_Member	GO Biological Processes	GO:1900542	regulation of purine nucleotide metabolic process	-3.15402	-1.1237	18/142	2954,5208,5209,5562,6396,8021,8604,10059,10762,11277,11319,23479,53371,55066,56848,79023,81929,339123	GSTZ1,PFKFB2,PFKFB3,PRKAA1,SEC13,NUP214,SLC25A12,DNM1L,NUP50,TREX1,ECD,ISCU,NUP54,PDPR,SPHK2,NUP37,SEH1L,JMJD8
10_Member	GO Biological Processes	GO:0006644	phospholipid metabolic process	-3.14881	-1.12141	40/431	975,1154,2627,2879,3417,3613,3631,3949,5130,5289,5298,8835,8904,9453,9487,9791,10026,10390,10400,10908,23556,27440,51205,51447,51604,54872,55512,56848,56910,57217,64419,65258,66036,79947,81579,113791,132001,147011,255043,376497	CD81,CISH,GATA6,GPX4,IDH1,IMPA2,INPP4A,LDLR,PCYT1A,PIK3C3,PI4KB,SOCS2,CPNE1,GGPS1,PIGL,PTDSS1,PIGK,CEPT1,PEMT,PNPLA6,PIGN,HDHD5,ACP6,IP6K2,PIGT,PIGG,SMPD3,SPHK2,STARD7,TTC7A,MTMR14,MPPE1,MTMR9,DHDDS,PLA2G12A,PIK3IP1,TAMM41,PROCA1,TMEM86B,SLC27A1
4_Member	GO Biological Processes	GO:0009205	purine ribonucleoside triphosphate metabolic process	-3.1336	-1.112	33/335	204,272,498,516,572,3607,4706,4707,4714,4718,4832,5208,5209,5562,6389,6396,8021,8505,8604,9054,10059,10762,11277,11319,23479,29789,51103,53371,56848,79023,79736,81929,339123	AK2,AMPD3,ATP5F1A,ATP5MC1,BAD,FOXK2,NDUFAB1,NDUFB1,NDUFB8,NDUFC2,NME3,PFKFB2,PFKFB3,PRKAA1,SDHA,SEC13,NUP214,PARG,SLC25A12,NFS1,DNM1L,NUP50,TREX1,ECD,ISCU,OLA1,NDUFAF1,NUP54,SPHK2,NUP37,TEFM,SEH1L,JMJD8
8_Member	GO Biological Processes	GO:0071347	cellular response to interleukin-1	-3.1271	-1.11121	21/179	2633,3551,4615,4790,5595,5699,5706,5708,5711,5715,5719,6347,8517,8564,8945,10197,10213,23118,23198,27316,81792	GBP1,IKBKB,MYD88,NFKB1,MAPK3,PSMB10,PSMC6,PSMD2,PSMD5,PSMD9,PSMD13,CCL2,IKBKG,KMO,BTRC,PSME3,PSMD14,TAB2,PSME4,RBMX,ADAMTS12
4_Member	GO Biological Processes	GO:1901361	organic cyclic compound catabolic process	-3.09224	-1.08478	62/755	272,955,1677,1773,1981,2592,2668,2954,3607,4615,5092,5141,5142,5208,5209,5562,5699,5706,5708,5711,5715,5719,5860,6171,6203,6396,6419,8021,8564,8604,8630,8930,9582,9784,10197,10213,10762,10767,10921,11277,11319,23198,23517,25904,27327,51441,51594,53371,54512,55802,65110,79023,79621,80150,80270,81929,83594,84153,84893,219988,221662,339123	AMPD3,ENTPD6,DFFB,DNASE1,EIF4G1,GALT,GDNF,GSTZ1,FOXK2,MYD88,PCBD1,PDE4A,PDE4B,PFKFB2,PFKFB3,PRKAA1,PSMB10,PSMC6,PSMD2,PSMD5,PSMD9,PSMD13,QDPR,RPL41,RPS9,SEC13,SETMAR,NUP214,KMO,SLC25A12,HSD17B6,MBD4,APOBEC3B,SNX17,PSME3,PSMD14,NUP50,HBS1L,RNPS1,TREX1,ECD,PSME4,MTREX,CNOT10,TNRC6A,YTHDF2,NBAS,NUP54,EXOSC4,DCP1A,UPF3A,NUP37,RNASEH2B,ASRGL1,HSD3B7,SEH1L,NUDT12,RNASEH2C,FBH1,PATL1,RBM24,JMJD8
1_Member	GO Biological Processes	GO:0042254	ribosome biogenesis	-3.07689	-1.07402	30/297	4931,6203,8945,9092,9326,10360,10438,11103,23517,27340,50628,51081,51202,51491,54512,55164,55178,55636,55651,55695,57062,57647,64963,79954,84135,84864,130916,134430,220064,260294	NVL,RPS9,BTRC,SART1,ZNHIT3,NPM3,C1D,KRR1,MTREX,UTP20,GEMIN4,MRPS7,DDX47,NOP16,EXOSC4,SHQ1,MRM3,CHD7,NHP2,NSUN5,DDX24,DHX37,MRPS11,NOL10,UTP15,RIOX2,MTERF4,WDR36,LTO1,NSUN5P2
12_Member	GO Biological Processes	GO:0000226	microtubule cytoskeleton organization	-3.07245	-1.07327	49/564	636,672,1058,1111,1453,2009,2011,2258,4085,4134,4287,5108,5562,5590,6491,6566,6651,6867,8045,8481,9738,10274,10783,22995,23354,25886,26005,26140,26973,28989,29911,51361,54462,54820,54828,54908,55125,56288,57787,79598,79929,84617,84942,85458,116840,124093,153241,157922,284403	BICD1,BRCA1,CENPA,CHEK1,CSNK1D,EML1,MARK2,FGF13,MAD2L1,MAP4,ATXN3,PCM1,PRKAA1,PRKCZ,STIL,SLC16A1,SON,TACC1,RASSF7,OFD1,CCP110,STAG1,NEK6,CEP152,HAUS5,POC1A,C2CD3,TTLL3,CHORDC1,NTMT1,HOOK2,HOOK1,CCSER2,NDE1,BCAS3,SPDL1,CEP192,PARD3,MARK4,CEP97,MAP6D1,TUBB6,WDR73,DIXDC1,CNTROB,CCDC78,CEP120,CAMSAP1,WDR62
4_Member	GO Biological Processes	GO:0046394	carboxylic acid biosynthetic process	-3.05909	-1.06534	42/464	672,972,1950,2618,2879,2948,3607,4522,4706,4790,5208,5209,5562,5825,6396,6470,7376,8021,8564,8604,8803,9415,10005,10762,11277,11319,23600,29920,51102,51144,53371,55512,56624,64834,79023,79152,80270,81929,127281,134429,339123,441024	BRCA1,CD74,EGF,GART,GPX4,GSTM4,FOXK2,MTHFD1,NDUFAB1,NFKB1,PFKFB2,PFKFB3,PRKAA1,ABCD3,SEC13,SHMT1,NR1H2,NUP214,KMO,SLC25A12,SUCLA2,FADS2,ACOT8,NUP50,TREX1,ECD,AMACR,PYCR2,MECR,HSD17B12,NUP54,SMPD3,ASAH2,ELOVL1,NUP37,FA2H,HSD3B7,SEH1L,PRXL2B,STARD4,JMJD8,MTHFD2L
4_Member	GO Biological Processes	GO:0043470	regulation of carbohydrate catabolic process	-3.04285	-1.06027	13/88	5208,5209,5562,6396,8021,8604,10762,11277,11319,53371,79023,81929,339123	PFKFB2,PFKFB3,PRKAA1,SEC13,NUP214,SLC25A12,NUP50,TREX1,ECD,NUP54,NUP37,SEH1L,JMJD8
4_Member	GO Biological Processes	GO:0016053	organic acid biosynthetic process	-3.04074	-1.06027	42/465	672,972,1950,2618,2879,2948,3607,4522,4706,4790,5208,5209,5562,5825,6396,6470,7376,8021,8564,8604,8803,9415,10005,10762,11277,11319,23600,29920,51102,51144,53371,55512,56624,64834,79023,79152,80270,81929,127281,134429,339123,441024	BRCA1,CD74,EGF,GART,GPX4,GSTM4,FOXK2,MTHFD1,NDUFAB1,NFKB1,PFKFB2,PFKFB3,PRKAA1,ABCD3,SEC13,SHMT1,NR1H2,NUP214,KMO,SLC25A12,SUCLA2,FADS2,ACOT8,NUP50,TREX1,ECD,AMACR,PYCR2,MECR,HSD17B12,NUP54,SMPD3,ASAH2,ELOVL1,NUP37,FA2H,HSD3B7,SEH1L,PRXL2B,STARD4,JMJD8,MTHFD2L
8_Member	GO Biological Processes	GO:0070555	response to interleukin-1	-3.03784	-1.05998	23/207	1535,2633,3551,4615,4790,5584,5595,5699,5706,5708,5711,5715,5719,6347,8517,8564,8945,10197,10213,23118,23198,27316,81792	CYBA,GBP1,IKBKB,MYD88,NFKB1,PRKCI,MAPK3,PSMB10,PSMC6,PSMD2,PSMD5,PSMD9,PSMD13,CCL2,IKBKG,KMO,BTRC,PSME3,PSMD14,TAB2,PSME4,RBMX,ADAMTS12
4_Member	GO Biological Processes	GO:1903578	regulation of ATP metabolic process	-3.0271	-1.05184	16/122	5208,5209,5562,6396,8021,8604,10059,10762,11277,11319,23479,53371,56848,79023,81929,339123	PFKFB2,PFKFB3,PRKAA1,SEC13,NUP214,SLC25A12,DNM1L,NUP50,TREX1,ECD,ISCU,NUP54,SPHK2,NUP37,SEH1L,JMJD8
4_Member	GO Biological Processes	GO:0006140	regulation of nucleotide metabolic process	-3.01144	-1.03875	18/146	2954,5208,5209,5562,6396,8021,8604,10059,10762,11277,11319,23479,53371,55066,56848,79023,81929,339123	GSTZ1,PFKFB2,PFKFB3,PRKAA1,SEC13,NUP214,SLC25A12,DNM1L,NUP50,TREX1,ECD,ISCU,NUP54,PDPR,SPHK2,NUP37,SEH1L,JMJD8
4_Member	GO Biological Processes	GO:0019439	aromatic compound catabolic process	-2.99203	-1.02445	59/717	272,955,1677,1773,1981,2592,2668,2954,3607,4615,5092,5141,5142,5208,5209,5562,5699,5706,5708,5711,5715,5719,5860,6171,6203,6396,6419,8021,8564,8604,8930,9582,10197,10213,10762,10767,10921,11277,11319,23198,23517,25904,27327,51441,51594,53371,54512,55802,65110,79023,79621,80150,81929,83594,84153,84893,219988,221662,339123	AMPD3,ENTPD6,DFFB,DNASE1,EIF4G1,GALT,GDNF,GSTZ1,FOXK2,MYD88,PCBD1,PDE4A,PDE4B,PFKFB2,PFKFB3,PRKAA1,PSMB10,PSMC6,PSMD2,PSMD5,PSMD9,PSMD13,QDPR,RPL41,RPS9,SEC13,SETMAR,NUP214,KMO,SLC25A12,MBD4,APOBEC3B,PSME3,PSMD14,NUP50,HBS1L,RNPS1,TREX1,ECD,PSME4,MTREX,CNOT10,TNRC6A,YTHDF2,NBAS,NUP54,EXOSC4,DCP1A,UPF3A,NUP37,RNASEH2B,ASRGL1,SEH1L,NUDT12,RNASEH2C,FBH1,PATL1,RBM24,JMJD8
8_Member	GO Biological Processes	GO:0002758	innate immune response-activating signal transduction	-2.98379	-1.01874	30/301	1508,1535,3551,3845,4615,4790,4795,5170,5289,5699,5706,5708,5711,5715,5719,7321,8517,8945,10197,10213,23098,23118,23151,23198,26007,55765,57402,63906,81622,85363	CTSB,CYBA,IKBKB,KRAS,MYD88,NFKB1,NFKBIL1,PDPK1,PIK3C3,PSMB10,PSMC6,PSMD2,PSMD5,PSMD9,PSMD13,UBE2D1,IKBKG,BTRC,PSME3,PSMD14,SARM1,TAB2,GRAMD4,PSME4,TKFC,INAVA,S100A14,GPATCH3,UNC93B1,TRIM5
4_Member	GO Biological Processes	GO:0009144	purine nucleoside triphosphate metabolic process	-2.98063	-1.01809	33/342	204,272,498,516,572,3607,4706,4707,4714,4718,4832,5208,5209,5562,6389,6396,8021,8505,8604,9054,10059,10762,11277,11319,23479,29789,51103,53371,56848,79023,79736,81929,339123	AK2,AMPD3,ATP5F1A,ATP5MC1,BAD,FOXK2,NDUFAB1,NDUFB1,NDUFB8,NDUFC2,NME3,PFKFB2,PFKFB3,PRKAA1,SDHA,SEC13,NUP214,PARG,SLC25A12,NFS1,DNM1L,NUP50,TREX1,ECD,ISCU,OLA1,NDUFAF1,NUP54,SPHK2,NUP37,TEFM,SEH1L,JMJD8
4_Member	GO Biological Processes	GO:0006110	regulation of glycolytic process	-2.95945	-0.999419	12/79	5208,5209,5562,6396,8021,10762,11277,11319,53371,79023,81929,339123	PFKFB2,PFKFB3,PRKAA1,SEC13,NUP214,NUP50,TREX1,ECD,NUP54,NUP37,SEH1L,JMJD8
4_Member	GO Biological Processes	GO:0046434	organophosphate catabolic process	-2.95196	-0.994917	26/249	272,2820,3417,3607,3613,3949,5141,5142,5208,5209,5562,6396,8021,8604,8930,10762,10908,11277,11319,53371,55276,55512,79023,81929,83594,339123	AMPD3,GPD2,IDH1,FOXK2,IMPA2,LDLR,PDE4A,PDE4B,PFKFB2,PFKFB3,PRKAA1,SEC13,NUP214,SLC25A12,MBD4,NUP50,PNPLA6,TREX1,ECD,NUP54,PGM2,SMPD3,NUP37,SEH1L,NUDT12,JMJD8
2_Member	GO Biological Processes	GO:0031058	positive regulation of histone modification	-2.94998	-0.994917	13/90	604,672,1789,4297,5252,5595,9733,10856,22823,25865,54904,56848,94104	BCL6,BRCA1,DNMT3B,KMT2A,PHF1,MAPK3,SART3,RUVBL2,MTF2,PRKD2,NSD3,SPHK2,PAXBP1
4_Member	GO Biological Processes	GO:0072330	monocarboxylic acid biosynthetic process	-2.93812	-0.98552	33/344	672,972,2879,2948,3607,4706,5208,5209,5562,5825,6396,7376,8021,8564,8604,9415,10005,10762,11277,11319,23600,51102,51144,53371,56624,64834,79023,79152,80270,81929,127281,134429,339123	BRCA1,CD74,GPX4,GSTM4,FOXK2,NDUFAB1,PFKFB2,PFKFB3,PRKAA1,ABCD3,SEC13,NR1H2,NUP214,KMO,SLC25A12,FADS2,ACOT8,NUP50,TREX1,ECD,AMACR,MECR,HSD17B12,NUP54,ASAH2,ELOVL1,NUP37,FA2H,HSD3B7,SEH1L,PRXL2B,STARD4,JMJD8
8_Member	GO Biological Processes	GO:0071356	cellular response to tumor necrosis factor	-2.90347	-0.953314	29/291	672,965,1277,1535,2633,3551,3987,4050,4790,5595,5699,5706,5708,5711,5715,5719,6347,8517,8717,8904,10197,10213,10401,23198,29965,51330,55512,81792,84817	BRCA1,CD58,COL1A1,CYBA,GBP1,IKBKB,LIMS1,LTB,NFKB1,MAPK3,PSMB10,PSMC6,PSMD2,PSMD5,PSMD9,PSMD13,CCL2,IKBKG,TRADD,CPNE1,PSME3,PSMD14,PIAS3,PSME4,CDIP1,TNFRSF12A,SMPD3,ADAMTS12,TXNDC17
2_Member	GO Biological Processes	GO:0034968	histone lysine methylation	-2.88823	-0.942929	15/114	672,1789,2122,4297,5252,6419,7468,9555,9757,10782,22823,30827,51742,54904,83852	BRCA1,DNMT3B,MECOM,KMT2A,PHF1,SETMAR,NSD2,MACROH2A1,KMT2B,ZNF274,MTF2,CXXC1,ARID4B,NSD3,SETDB2
11_Member	GO Biological Processes	GO:0072698	protein localization to microtubule cytoskeleton	-2.87485	-0.94134	9/50	636,1453,5108,6491,26005,51134,55125,57787,64770	BICD1,CSNK1D,PCM1,STIL,C2CD3,CEP83,CEP192,MARK4,CCDC14
20_Member	GO Biological Processes	GO:0061912	selective autophagy	-2.87485	-0.94134	9/50	5595,7249,9474,9776,9927,23001,26100,27429,51368	MAPK3,TSC2,ATG5,ATG13,MFN2,WDFY3,WIPI2,HTRA2,TEX264
4_Member	GO Biological Processes	GO:0009135	purine nucleoside diphosphate metabolic process	-2.8724	-0.94134	17/138	204,272,572,3607,5208,5209,5562,6396,8021,8604,10762,11277,11319,53371,79023,81929,339123	AK2,AMPD3,BAD,FOXK2,PFKFB2,PFKFB3,PRKAA1,SEC13,NUP214,SLC25A12,NUP50,TREX1,ECD,NUP54,NUP37,SEH1L,JMJD8
4_Member	GO Biological Processes	GO:0009179	purine ribonucleoside diphosphate metabolic process	-2.8724	-0.94134	17/138	204,272,572,3607,5208,5209,5562,6396,8021,8604,10762,11277,11319,53371,79023,81929,339123	AK2,AMPD3,BAD,FOXK2,PFKFB2,PFKFB3,PRKAA1,SEC13,NUP214,SLC25A12,NUP50,TREX1,ECD,NUP54,NUP37,SEH1L,JMJD8
2_Member	GO Biological Processes	GO:1905269	positive regulation of chromatin organization	-2.86994	-0.941206	14/103	604,672,1789,4297,5252,5595,9733,10856,22823,25865,51535,54904,56848,94104	BCL6,BRCA1,DNMT3B,KMT2A,PHF1,MAPK3,SART3,RUVBL2,MTF2,PRKD2,PPHLN1,NSD3,SPHK2,PAXBP1
8_Member	GO Biological Processes	GO:0031145	anaphase-promoting complex-dependent catabolic process	-2.86242	-0.940601	12/81	4085,5699,5706,5708,5711,5715,5719,7321,7324,10197,10213,23198	MAD2L1,PSMB10,PSMC6,PSMD2,PSMD5,PSMD9,PSMD13,UBE2D1,UBE2E1,PSME3,PSMD14,PSME4
4_Member	GO Biological Processes	GO:0009141	nucleoside triphosphate metabolic process	-2.85277	-0.935497	34/362	204,272,498,516,572,3607,4706,4707,4714,4718,4832,5208,5209,5562,6389,6396,7371,8021,8505,8604,9054,10059,10762,11277,11319,23479,29789,51103,53371,56848,79023,79736,81929,339123	AK2,AMPD3,ATP5F1A,ATP5MC1,BAD,FOXK2,NDUFAB1,NDUFB1,NDUFB8,NDUFC2,NME3,PFKFB2,PFKFB3,PRKAA1,SDHA,SEC13,UCK2,NUP214,PARG,SLC25A12,NFS1,DNM1L,NUP50,TREX1,ECD,ISCU,OLA1,NDUFAF1,NUP54,SPHK2,NUP37,TEFM,SEH1L,JMJD8
4_Member	GO Biological Processes	GO:0034655	nucleobase-containing compound catabolic process	-2.84973	-0.934713	54/652	272,955,1677,1773,1981,2592,2668,3607,4615,5141,5142,5208,5209,5562,5699,5706,5708,5711,5715,5719,6171,6203,6396,6419,8021,8604,8930,9582,10197,10213,10762,10767,10921,11277,11319,23198,23517,25904,27327,51441,51594,53371,54512,55802,65110,79023,79621,81929,83594,84153,84893,219988,221662,339123	AMPD3,ENTPD6,DFFB,DNASE1,EIF4G1,GALT,GDNF,FOXK2,MYD88,PDE4A,PDE4B,PFKFB2,PFKFB3,PRKAA1,PSMB10,PSMC6,PSMD2,PSMD5,PSMD9,PSMD13,RPL41,RPS9,SEC13,SETMAR,NUP214,SLC25A12,MBD4,APOBEC3B,PSME3,PSMD14,NUP50,HBS1L,RNPS1,TREX1,ECD,PSME4,MTREX,CNOT10,TNRC6A,YTHDF2,NBAS,NUP54,EXOSC4,DCP1A,UPF3A,NUP37,RNASEH2B,SEH1L,NUDT12,RNASEH2C,FBH1,PATL1,RBM24,JMJD8
2_Member	GO Biological Processes	GO:0061086	negative regulation of histone H3-K27 methylation	-2.83215	-0.923041	3/5	5252,9555,22823	PHF1,MACROH2A1,MTF2
8_Member	GO Biological Processes	GO:0002218	activation of innate immune response	-2.82059	-0.916683	31/322	1508,1535,3551,3845,4615,4790,4795,5170,5289,5699,5706,5708,5711,5715,5719,6421,7321,8517,8945,10197,10213,23098,23118,23151,23198,26007,55765,57402,63906,81622,85363	CTSB,CYBA,IKBKB,KRAS,MYD88,NFKB1,NFKBIL1,PDPK1,PIK3C3,PSMB10,PSMC6,PSMD2,PSMD5,PSMD9,PSMD13,SFPQ,UBE2D1,IKBKG,BTRC,PSME3,PSMD14,SARM1,TAB2,GRAMD4,PSME4,TKFC,INAVA,S100A14,GPATCH3,UNC93B1,TRIM5
4_Member	GO Biological Processes	GO:0009185	ribonucleoside diphosphate metabolic process	-2.80359	-0.908362	17/140	204,272,572,3607,5208,5209,5562,6396,8021,8604,10762,11277,11319,53371,79023,81929,339123	AK2,AMPD3,BAD,FOXK2,PFKFB2,PFKFB3,PRKAA1,SEC13,NUP214,SLC25A12,NUP50,TREX1,ECD,NUP54,NUP37,SEH1L,JMJD8
14_Member	GO Biological Processes	GO:0000209	protein polyubiquitination	-2.78333	-0.891453	30/310	596,642,672,5699,5706,5708,5711,5715,5719,7319,7321,7324,7328,8945,9354,10197,10213,10277,23198,23321,23759,51283,51366,54850,55658,85363,89910,91694,142678,494470	BCL2,BLMH,BRCA1,PSMB10,PSMC6,PSMD2,PSMD5,PSMD9,PSMD13,UBE2A,UBE2D1,UBE2E1,UBE2H,BTRC,UBE4A,PSME3,PSMD14,UBE4B,PSME4,TRIM2,PPIL2,BFAR,UBR5,FBXL12,RNF126,TRIM5,UBE3B,LONRF1,MIB2,RNF165
8_Member	GO Biological Processes	GO:1903311	regulation of mRNA metabolic process	-2.7782	-0.891453	31/324	984,1981,2668,4615,5699,5706,5708,5711,5715,5719,6294,6427,6651,8021,9733,10150,10197,10213,10768,10921,23198,27316,27327,51441,51594,54512,55796,55802,79811,140890,221662	CDK11B,EIF4G1,GDNF,MYD88,PSMB10,PSMC6,PSMD2,PSMD5,PSMD9,PSMD13,SAFB,SRSF2,SON,NUP214,SART3,MBNL2,PSME3,PSMD14,AHCYL1,RNPS1,PSME4,RBMX,TNRC6A,YTHDF2,NBAS,EXOSC4,MBNL3,DCP1A,SLTM,SREK1,RBM24
2_Member	GO Biological Processes	GO:0031057	negative regulation of histone modification	-2.77575	-0.891453	8/42	672,1789,5252,9474,9555,22823,51366,56848	BRCA1,DNMT3B,PHF1,ATG5,MACROH2A1,MTF2,UBR5,SPHK2
19_Member	GO Biological Processes	GO:0070585	protein localization to mitochondrion	-2.76981	-0.891453	17/141	572,596,5562,7159,7161,9776,9927,10059,27429,29090,79778,83943,89781,90427,130916,131118,401505	BAD,BCL2,PRKAA1,TP53BP2,TP73,ATG13,MFN2,DNM1L,HTRA2,TIMM21,MICALL2,IMMP2L,HPS4,BMF,MTERF4,DNAJC19,TOMM5
2_Member	GO Biological Processes	GO:1905268	negative regulation of chromatin organization	-2.75515	-0.88091	10/62	672,1789,5252,9474,9555,22823,23133,51366,54454,56848	BRCA1,DNMT3B,PHF1,ATG5,MACROH2A1,MTF2,PHF8,UBR5,ATAD2B,SPHK2
4_Member	GO Biological Processes	GO:0006090	pyruvate metabolic process	-2.74556	-0.873362	18/154	682,2954,3607,5208,5209,5562,6396,6566,8021,8604,10762,11277,11319,53371,55066,79023,81929,339123	BSG,GSTZ1,FOXK2,PFKFB2,PFKFB3,PRKAA1,SEC13,SLC16A1,NUP214,SLC25A12,NUP50,TREX1,ECD,NUP54,PDPR,NUP37,SEH1L,JMJD8
8_Member	GO Biological Processes	GO:0031146	SCF-dependent proteasomal ubiquitin-dependent protein catabolic process	-2.73141	-0.867292	13/95	5699,5706,5708,5711,5715,5719,6815,8945,10197,10213,23198,25827,54850	PSMB10,PSMC6,PSMD2,PSMD5,PSMD9,PSMD13,STYX,BTRC,PSME3,PSMD14,PSME4,FBXL2,FBXL12
8_Member	GO Biological Processes	GO:0033209	tumor necrosis factor-mediated signaling pathway	-2.72876	-0.86664	19/167	3551,3987,4050,5699,5706,5708,5711,5715,5719,8517,8717,8904,10197,10213,10401,23198,29965,51330,84817	IKBKB,LIMS1,LTB,PSMB10,PSMC6,PSMD2,PSMD5,PSMD9,PSMD13,IKBKG,TRADD,CPNE1,PSME3,PSMD14,PIAS3,PSME4,CDIP1,TNFRSF12A,TXNDC17
13_Member	GO Biological Processes	GO:0000096	sulfur amino acid metabolic process	-2.7072	-0.852975	8/43	642,2730,4357,4522,9054,10768,23382,441024	BLMH,GCLM,MPST,MTHFD1,NFS1,AHCYL1,AHCYL2,MTHFD2L
4_Member	GO Biological Processes	GO:0051193	regulation of cofactor metabolic process	-2.69963	-0.849296	15/119	2954,5208,5209,5562,6396,8021,8604,10762,11277,11319,53371,55066,79023,81929,339123	GSTZ1,PFKFB2,PFKFB3,PRKAA1,SEC13,NUP214,SLC25A12,NUP50,TREX1,ECD,NUP54,PDPR,NUP37,SEH1L,JMJD8
10_Member	GO Biological Processes	GO:0008654	phospholipid biosynthetic process	-2.68483	-0.836796	26/260	3417,3631,5130,5289,5298,8904,9453,9487,9791,10026,10390,10400,23556,27440,51205,51604,54872,56848,56910,64419,65258,66036,79947,81579,132001,376497	IDH1,INPP4A,PCYT1A,PIK3C3,PI4KB,CPNE1,GGPS1,PIGL,PTDSS1,PIGK,CEPT1,PEMT,PIGN,HDHD5,ACP6,PIGT,PIGG,SPHK2,STARD7,MTMR14,MPPE1,MTMR9,DHDDS,PLA2G12A,TAMM41,SLC27A1
8_Member	GO Biological Processes	GO:0019884	antigen processing and presentation of exogenous antigen	-2.66089	-0.823924	20/182	972,1535,2209,3551,5699,5706,5708,5711,5715,5719,6396,8517,8546,8773,8907,9871,10197,10213,23198,83547	CD74,CYBA,FCGR1A,IKBKB,PSMB10,PSMC6,PSMD2,PSMD5,PSMD9,PSMD13,SEC13,IKBKG,AP3B1,SNAP23,AP1M1,SEC24D,PSME3,PSMD14,PSME4,RILP
2_Member	GO Biological Processes	GO:0018023	peptidyl-lysine trimethylation	-2.64088	-0.809524	8/44	4297,9757,10782,51742,54904,79609,254013,751071	KMT2A,KMT2B,ZNF274,ARID4B,NSD3,VCPKMT,ETFBKMT,CSKMT
2_Member	GO Biological Processes	GO:0033044	regulation of chromosome organization	-2.63419	-0.804682	32/345	604,672,817,1111,1789,4085,4297,5252,5371,5595,6419,6421,9474,9555,9733,9757,10694,10782,10783,10856,22823,23133,25865,51366,51535,54454,54904,54908,56155,56848,79829,94104	BCL6,BRCA1,CAMK2D,CHEK1,DNMT3B,MAD2L1,KMT2A,PHF1,PML,MAPK3,SETMAR,SFPQ,ATG5,MACROH2A1,SART3,KMT2B,CCT8,ZNF274,NEK6,RUVBL2,MTF2,PHF8,PRKD2,UBR5,PPHLN1,ATAD2B,NSD3,SPDL1,TEX14,SPHK2,NAA40,PAXBP1
4_Member	GO Biological Processes	GO:0009132	nucleoside diphosphate metabolic process	-2.62154	-0.79571	18/158	204,272,572,3607,4832,5208,5209,5562,6396,8021,8604,10762,11277,11319,53371,79023,81929,339123	AK2,AMPD3,BAD,FOXK2,NME3,PFKFB2,PFKFB3,PRKAA1,SEC13,NUP214,SLC25A12,NUP50,TREX1,ECD,NUP54,NUP37,SEH1L,JMJD8
2_Member	GO Biological Processes	GO:0031060	regulation of histone methylation	-2.59751	-0.780602	10/65	672,1789,4297,5252,9555,9757,10782,22823,54904,94104	BRCA1,DNMT3B,KMT2A,PHF1,MACROH2A1,KMT2B,ZNF274,MTF2,NSD3,PAXBP1
5_Member	GO Biological Processes	GO:0010948	negative regulation of cell cycle process	-2.59736	-0.780602	33/361	596,604,672,835,995,1019,1031,1111,1876,3275,4085,5371,5699,5706,5708,5711,5715,5719,6045,6347,6419,8738,9555,10197,10213,10795,23198,23269,25904,51347,54908,56155,146691	BCL2,BCL6,BRCA1,CASP2,CDC25C,CDK4,CDKN2C,CHEK1,E2F6,PRMT2,MAD2L1,PML,PSMB10,PSMC6,PSMD2,PSMD5,PSMD9,PSMD13,RNF2,CCL2,SETMAR,CRADD,MACROH2A1,PSME3,PSMD14,ZNF268,PSME4,MGA,CNOT10,TAOK3,SPDL1,TEX14,TOM1L2
10_Member	GO Biological Processes	GO:0006650	glycerophospholipid metabolic process	-2.59473	-0.779764	30/319	1154,3613,3631,3949,5130,5289,5298,8835,8904,9487,9791,10026,10390,10400,10908,23556,27440,51205,51447,51604,54872,56910,57217,64419,65258,66036,81579,132001,255043,376497	CISH,IMPA2,INPP4A,LDLR,PCYT1A,PIK3C3,PI4KB,SOCS2,CPNE1,PIGL,PTDSS1,PIGK,CEPT1,PEMT,PNPLA6,PIGN,HDHD5,ACP6,IP6K2,PIGT,PIGG,STARD7,TTC7A,MTMR14,MPPE1,MTMR9,PLA2G12A,TAMM41,TMEM86B,SLC27A1
11_Member	GO Biological Processes	GO:0044380	protein localization to cytoskeleton	-2.57577	-0.767714	9/55	636,1453,5108,6491,26005,51134,55125,57787,64770	BICD1,CSNK1D,PCM1,STIL,C2CD3,CEP83,CEP192,MARK4,CCDC14
4_Member	GO Biological Processes	GO:0019359	nicotinamide nucleotide biosynthetic process	-2.57559	-0.767714	17/147	3607,5208,5209,5562,6396,8021,8564,10762,11277,11319,53371,79023,81929,83594,83666,133686,339123	FOXK2,PFKFB2,PFKFB3,PRKAA1,SEC13,NUP214,KMO,NUP50,TREX1,ECD,NUP54,NUP37,SEH1L,NUDT12,PARP9,NADK2,JMJD8
4_Member	GO Biological Processes	GO:0019363	pyridine nucleotide biosynthetic process	-2.57559	-0.767714	17/147	3607,5208,5209,5562,6396,8021,8564,10762,11277,11319,53371,79023,81929,83594,83666,133686,339123	FOXK2,PFKFB2,PFKFB3,PRKAA1,SEC13,NUP214,KMO,NUP50,TREX1,ECD,NUP54,NUP37,SEH1L,NUDT12,PARP9,NADK2,JMJD8
8_Member	GO Biological Processes	GO:0060070	canonical Wnt signaling pathway	-2.55476	-0.753852	31/335	1277,1452,1453,1456,1856,1950,2889,4300,4790,5204,5699,5706,5708,5711,5715,5719,6934,7089,7090,7091,8945,10076,10197,10213,10856,23198,51366,53944,85458,90410,261734	COL1A1,CSNK1A1,CSNK1D,CSNK1G3,DVL2,EGF,RAPGEF1,MLLT3,NFKB1,PFDN5,PSMB10,PSMC6,PSMD2,PSMD5,PSMD9,PSMD13,TCF7L2,TLE2,TLE3,TLE4,BTRC,PTPRU,PSME3,PSMD14,RUVBL2,PSME4,UBR5,CSNK1G1,DIXDC1,IFT20,NPHP4
8_Member	GO Biological Processes	GO:0002757	immune response-activating signal transduction	-2.53642	-0.740672	52/644	596,975,1508,1535,1793,1997,2209,2633,2889,3551,3783,3845,3958,3984,4277,4615,4690,4790,4795,5142,5170,5289,5595,5699,5706,5708,5711,5715,5719,7321,7456,8517,8945,10006,10197,10213,10458,23098,23118,23151,23198,25865,26007,26999,29085,51517,55765,57402,63906,81622,85363,147179	BCL2,CD81,CTSB,CYBA,DOCK1,ELF1,FCGR1A,GBP1,RAPGEF1,IKBKB,KCNN4,KRAS,LGALS3,LIMK1,MICB,MYD88,NCK1,NFKB1,NFKBIL1,PDE4B,PDPK1,PIK3C3,MAPK3,PSMB10,PSMC6,PSMD2,PSMD5,PSMD9,PSMD13,UBE2D1,WIPF1,IKBKG,BTRC,ABI1,PSME3,PSMD14,BAIAP2,SARM1,TAB2,GRAMD4,PSME4,PRKD2,TKFC,CYFIP2,PHPT1,NCKIPSD,INAVA,S100A14,GPATCH3,UNC93B1,TRIM5,WIPF2
5_Member	GO Biological Processes	GO:1901988	negative regulation of cell cycle phase transition	-2.52637	-0.732333	26/267	596,672,835,995,1019,1031,1111,3275,4085,5371,5699,5706,5708,5711,5715,5719,6347,8738,9555,10197,10213,23198,25904,51347,54908,56155	BCL2,BRCA1,CASP2,CDC25C,CDK4,CDKN2C,CHEK1,PRMT2,MAD2L1,PML,PSMB10,PSMC6,PSMD2,PSMD5,PSMD9,PSMD13,CCL2,CRADD,MACROH2A1,PSME3,PSMD14,PSME4,CNOT10,TAOK3,SPDL1,TEX14
11_Member	GO Biological Processes	GO:1905515	non-motile cilium assembly	-2.52071	-0.731463	9/56	1453,4134,5108,25886,26005,55212,55764,57560,84902	CSNK1D,MAP4,PCM1,POC1A,C2CD3,BBS7,IFT122,IFT80,CEP89
4_Member	GO Biological Processes	GO:0044270	cellular nitrogen compound catabolic process	-2.5206	-0.731463	56/706	272,955,1677,1773,1981,2592,2668,3607,4357,4615,5141,5142,5208,5209,5562,5699,5706,5708,5711,5715,5719,6171,6203,6396,6419,8021,8564,8604,8930,9582,10197,10213,10762,10767,10921,11277,11319,23198,23517,25904,27327,51441,51594,53371,54512,55802,65110,79023,79621,81929,83594,84153,84893,219988,221662,339123	AMPD3,ENTPD6,DFFB,DNASE1,EIF4G1,GALT,GDNF,FOXK2,MPST,MYD88,PDE4A,PDE4B,PFKFB2,PFKFB3,PRKAA1,PSMB10,PSMC6,PSMD2,PSMD5,PSMD9,PSMD13,RPL41,RPS9,SEC13,SETMAR,NUP214,KMO,SLC25A12,MBD4,APOBEC3B,PSME3,PSMD14,NUP50,HBS1L,RNPS1,TREX1,ECD,PSME4,MTREX,CNOT10,TNRC6A,YTHDF2,NBAS,NUP54,EXOSC4,DCP1A,UPF3A,NUP37,RNASEH2B,SEH1L,NUDT12,RNASEH2C,FBH1,PATL1,RBM24,JMJD8
8_Member	GO Biological Processes	GO:0019882	antigen processing and presentation	-2.51262	-0.725343	23/227	972,1535,2209,3551,5699,5706,5708,5711,5715,5719,5873,6396,8517,8546,8773,8907,9474,9871,10197,10213,11277,23198,83547	CD74,CYBA,FCGR1A,IKBKB,PSMB10,PSMC6,PSMD2,PSMD5,PSMD9,PSMD13,RAB27A,SEC13,IKBKG,AP3B1,SNAP23,AP1M1,ATG5,SEC24D,PSME3,PSMD14,TREX1,PSME4,RILP
4_Member	GO Biological Processes	GO:0006091	generation of precursor metabolites and energy	-2.50839	-0.722791	44/526	158,498,516,1535,2232,2235,2820,2997,3417,3420,3607,3795,4706,4707,4714,4718,5019,5208,5209,5562,5860,6389,6396,8021,8604,8630,8803,8908,9016,10762,11277,11319,23479,51103,53371,55276,56848,79023,79178,79736,81929,83943,254013,339123	ADSL,ATP5F1A,ATP5MC1,CYBA,FDXR,FECH,GPD2,GYS1,IDH1,IDH3B,FOXK2,KHK,NDUFAB1,NDUFB1,NDUFB8,NDUFC2,OXCT1,PFKFB2,PFKFB3,PRKAA1,QDPR,SDHA,SEC13,NUP214,SLC25A12,HSD17B6,SUCLA2,GYG2,SLC25A14,NUP50,TREX1,ECD,ISCU,NDUFAF1,NUP54,PGM2,SPHK2,NUP37,THTPA,TEFM,SEH1L,IMMP2L,ETFBKMT,JMJD8
19_Member	GO Biological Processes	GO:0072655	establishment of protein localization to mitochondrion	-2.49959	-0.720124	16/137	572,596,5562,7159,7161,9776,9927,27429,29090,79778,83943,89781,90427,130916,131118,401505	BAD,BCL2,PRKAA1,TP53BP2,TP73,ATG13,MFN2,HTRA2,TIMM21,MICALL2,IMMP2L,HPS4,BMF,MTERF4,DNAJC19,TOMM5
8_Member	GO Biological Processes	GO:0002478	antigen processing and presentation of exogenous peptide antigen	-2.49756	-0.720124	19/175	972,1535,2209,3551,5699,5706,5708,5711,5715,5719,6396,8517,8773,8907,9871,10197,10213,23198,83547	CD74,CYBA,FCGR1A,IKBKB,PSMB10,PSMC6,PSMD2,PSMD5,PSMD9,PSMD13,SEC13,IKBKG,SNAP23,AP1M1,SEC24D,PSME3,PSMD14,PSME4,RILP
8_Member	GO Biological Processes	GO:0002764	immune response-regulating signaling pathway	-2.48756	-0.713498	54/678	596,975,1508,1535,1793,1997,2209,2633,2889,3551,3783,3845,3958,3984,4277,4615,4690,4775,4790,4795,5142,5170,5289,5595,5602,5699,5706,5708,5711,5715,5719,7321,7456,8517,8945,10006,10197,10213,10458,23098,23118,23151,23198,25865,26007,26999,29085,51517,55765,57402,63906,81622,85363,147179	BCL2,CD81,CTSB,CYBA,DOCK1,ELF1,FCGR1A,GBP1,RAPGEF1,IKBKB,KCNN4,KRAS,LGALS3,LIMK1,MICB,MYD88,NCK1,NFATC3,NFKB1,NFKBIL1,PDE4B,PDPK1,PIK3C3,MAPK3,MAPK10,PSMB10,PSMC6,PSMD2,PSMD5,PSMD9,PSMD13,UBE2D1,WIPF1,IKBKG,BTRC,ABI1,PSME3,PSMD14,BAIAP2,SARM1,TAB2,GRAMD4,PSME4,PRKD2,TKFC,CYFIP2,PHPT1,NCKIPSD,INAVA,S100A14,GPATCH3,UNC93B1,TRIM5,WIPF2
4_Member	GO Biological Processes	GO:0072525	pyridine-containing compound biosynthetic process	-2.48365	-0.711205	17/150	3607,5208,5209,5562,6396,8021,8564,10762,11277,11319,53371,79023,81929,83594,83666,133686,339123	FOXK2,PFKFB2,PFKFB3,PRKAA1,SEC13,NUP214,KMO,NUP50,TREX1,ECD,NUP54,NUP37,SEH1L,NUDT12,PARP9,NADK2,JMJD8
8_Member	GO Biological Processes	GO:0045088	regulation of innate immune response	-2.48153	-0.710702	39/454	1508,1535,3551,3845,4277,4615,4790,4795,5170,5289,5699,5706,5708,5711,5715,5719,6421,7321,7341,7376,7804,8517,8945,10197,10213,11277,23098,23118,23151,23198,23705,26007,51441,55765,57402,63906,81622,83666,85363	CTSB,CYBA,IKBKB,KRAS,MICB,MYD88,NFKB1,NFKBIL1,PDPK1,PIK3C3,PSMB10,PSMC6,PSMD2,PSMD5,PSMD9,PSMD13,SFPQ,UBE2D1,SUMO1,NR1H2,LRP8,IKBKG,BTRC,PSME3,PSMD14,TREX1,SARM1,TAB2,GRAMD4,PSME4,CADM1,TKFC,YTHDF2,INAVA,S100A14,GPATCH3,UNC93B1,PARP9,TRIM5
10_Member	GO Biological Processes	GO:0006497	protein lipidation	-2.46826	-0.701082	12/90	5289,9474,9487,10026,23556,25782,26100,51604,54872,65258,79929,84885	PIK3C3,ATG5,PIGL,PIGK,PIGN,RAB3GAP2,WIPI2,PIGT,PIGG,MPPE1,MAP6D1,ZDHHC12
8_Member	GO Biological Processes	GO:0034612	response to tumor necrosis factor	-2.45456	-0.690215	29/312	672,965,1277,1535,2633,3551,3987,4050,4790,5595,5699,5706,5708,5711,5715,5719,6347,8517,8717,8904,10197,10213,10401,23198,29965,51330,55512,81792,84817	BRCA1,CD58,COL1A1,CYBA,GBP1,IKBKB,LIMS1,LTB,NFKB1,MAPK3,PSMB10,PSMC6,PSMD2,PSMD5,PSMD9,PSMD13,CCL2,IKBKG,TRADD,CPNE1,PSME3,PSMD14,PIAS3,PSME4,CDIP1,TNFRSF12A,SMPD3,ADAMTS12,TXNDC17
4_Member	GO Biological Processes	GO:0009201	ribonucleoside triphosphate biosynthetic process	-2.44278	-0.683114	19/177	498,516,3607,4832,5208,5209,5562,6396,7371,8021,8604,10762,11277,11319,53371,56848,79023,81929,339123	ATP5F1A,ATP5MC1,FOXK2,NME3,PFKFB2,PFKFB3,PRKAA1,SEC13,UCK2,NUP214,SLC25A12,NUP50,TREX1,ECD,NUP54,SPHK2,NUP37,SEH1L,JMJD8
8_Member	GO Biological Processes	GO:0045089	positive regulation of innate immune response	-2.43755	-0.679454	34/384	1508,1535,3551,3845,4277,4615,4790,4795,5170,5289,5699,5706,5708,5711,5715,5719,6421,7321,8517,8945,10197,10213,23098,23118,23151,23198,23705,26007,55765,57402,63906,81622,83666,85363	CTSB,CYBA,IKBKB,KRAS,MICB,MYD88,NFKB1,NFKBIL1,PDPK1,PIK3C3,PSMB10,PSMC6,PSMD2,PSMD5,PSMD9,PSMD13,SFPQ,UBE2D1,IKBKG,BTRC,PSME3,PSMD14,SARM1,TAB2,GRAMD4,PSME4,CADM1,TKFC,INAVA,S100A14,GPATCH3,UNC93B1,PARP9,TRIM5
2_Member	GO Biological Processes	GO:0031061	negative regulation of histone methylation	-2.43574	-0.679204	5/20	672,1789,5252,9555,22823	BRCA1,DNMT3B,PHF1,MACROH2A1,MTF2
10_Member	GO Biological Processes	GO:0046474	glycerophospholipid biosynthetic process	-2.43126	-0.677563	22/217	3631,5130,5289,5298,8904,9487,9791,10026,10390,10400,23556,27440,51205,51604,54872,56910,64419,65258,66036,81579,132001,376497	INPP4A,PCYT1A,PIK3C3,PI4KB,CPNE1,PIGL,PTDSS1,PIGK,CEPT1,PEMT,PIGN,HDHD5,ACP6,PIGT,PIGG,STARD7,MTMR14,MPPE1,MTMR9,PLA2G12A,TAMM41,SLC27A1
4_Member	GO Biological Processes	GO:0032787	monocarboxylic acid metabolic process	-2.41512	-0.667599	52/653	672,682,686,972,2879,2948,2954,3033,3417,3607,4706,5208,5209,5562,5595,5825,6396,6566,7376,8021,8564,8604,9415,10005,10762,10999,11277,11319,23600,28976,51102,51144,53371,55066,55347,55862,56624,56922,64087,64834,79023,79152,80150,80270,81929,127281,132949,134429,254013,339123,376497,414328	BRCA1,BSG,BTD,CD74,GPX4,GSTM4,GSTZ1,HADH,IDH1,FOXK2,NDUFAB1,PFKFB2,PFKFB3,PRKAA1,MAPK3,ABCD3,SEC13,SLC16A1,NR1H2,NUP214,KMO,SLC25A12,FADS2,ACOT8,NUP50,SLC27A4,TREX1,ECD,AMACR,ACAD9,MECR,HSD17B12,NUP54,PDPR,ABHD10,ECHDC1,ASAH2,MCCC1,MCCC2,ELOVL1,NUP37,FA2H,ASRGL1,HSD3B7,SEH1L,PRXL2B,AASDH,STARD4,ETFBKMT,JMJD8,SLC27A1,IDNK
19_Member	GO Biological Processes	GO:1903749	positive regulation of establishment of protein localization to mitochondrion	-2.41486	-0.667599	9/58	572,596,5562,7159,7161,9776,27429,79778,89781	BAD,BCL2,PRKAA1,TP53BP2,TP73,ATG13,HTRA2,MICALL2,HPS4
8_Member	GO Biological Processes	GO:0030177	positive regulation of Wnt signaling pathway	-2.38915	-0.647964	19/179	1277,1453,1456,1950,4300,4790,5699,5706,5708,5711,5715,5719,10197,10213,23198,23213,51366,53944,85458	COL1A1,CSNK1D,CSNK1G3,EGF,MLLT3,NFKB1,PSMB10,PSMC6,PSMD2,PSMD5,PSMD9,PSMD13,PSME3,PSMD14,PSME4,SULF1,UBR5,CSNK1G1,DIXDC1
8_Member	GO Biological Processes	GO:1905114	cell surface receptor signaling pathway involved in cell-cell signaling	-2.38257	-0.646124	50/625	135,898,1140,1277,1452,1453,1456,1742,1856,1950,2011,2889,3675,4300,4355,4790,5204,5562,5590,5699,5706,5708,5711,5715,5719,6934,7089,7090,7091,7249,8945,9209,10076,10197,10213,10458,10497,10856,23198,23213,27327,51366,53944,57447,57560,57658,64897,85458,90410,261734	ADORA2A,CCNE1,CHRNB1,COL1A1,CSNK1A1,CSNK1D,CSNK1G3,DLG4,DVL2,EGF,MARK2,RAPGEF1,ITGA3,MLLT3,MPP2,NFKB1,PFDN5,PRKAA1,PRKCZ,PSMB10,PSMC6,PSMD2,PSMD5,PSMD9,PSMD13,TCF7L2,TLE2,TLE3,TLE4,TSC2,BTRC,LRRFIP2,PTPRU,PSME3,PSMD14,BAIAP2,UNC13B,RUVBL2,PSME4,SULF1,TNRC6A,UBR5,CSNK1G1,NDRG2,IFT80,CALCOCO1,C12orf43,DIXDC1,IFT20,NPHP4
4_Member	GO Biological Processes	GO:0006109	regulation of carbohydrate metabolic process	-2.37395	-0.640245	21/206	572,1950,3607,3795,4790,5208,5209,5562,6396,8021,8604,10762,11277,11319,53371,55512,57223,79023,81929,84912,339123	BAD,EGF,FOXK2,KHK,NFKB1,PFKFB2,PFKFB3,PRKAA1,SEC13,NUP214,SLC25A12,NUP50,TREX1,ECD,NUP54,SMPD3,PPP4R3B,NUP37,SEH1L,SLC35B4,JMJD8
19_Member	GO Biological Processes	GO:0006605	protein targeting	-2.36289	-0.632139	37/432	2664,3417,5189,5190,5562,5584,5824,5873,6171,6203,7321,8546,9179,9747,9765,9776,9927,10005,10901,10956,23600,27429,29090,53371,54471,55048,55670,56288,79778,83943,84750,84885,89781,130617,130916,131118,401505	GDI1,IDH1,PEX1,PEX6,PRKAA1,PRKCI,PEX19,RAB27A,RPL41,RPS9,UBE2D1,AP3B1,AP4M1,TCAF1,ZFYVE16,ATG13,MFN2,ACOT8,DHRS4,OS9,AMACR,HTRA2,TIMM21,NUP54,MIEF1,VPS37C,PEX26,PARD3,MICALL2,IMMP2L,FUT10,ZDHHC12,HPS4,ZFAND2B,MTERF4,DNAJC19,TOMM5
8_Member	GO Biological Processes	GO:0016055	Wnt signaling pathway	-2.34595	-0.628819	43/522	898,1277,1452,1453,1456,1856,1950,2011,2889,3675,4300,4790,5204,5562,5699,5706,5708,5711,5715,5719,6934,7089,7090,7091,7249,8945,9209,10076,10197,10213,10856,23198,23213,27327,51366,53944,57447,57560,57658,64897,85458,90410,261734	CCNE1,COL1A1,CSNK1A1,CSNK1D,CSNK1G3,DVL2,EGF,MARK2,RAPGEF1,ITGA3,MLLT3,NFKB1,PFDN5,PRKAA1,PSMB10,PSMC6,PSMD2,PSMD5,PSMD9,PSMD13,TCF7L2,TLE2,TLE3,TLE4,TSC2,BTRC,LRRFIP2,PTPRU,PSME3,PSMD14,RUVBL2,PSME4,SULF1,TNRC6A,UBR5,CSNK1G1,NDRG2,IFT80,CALCOCO1,C12orf43,DIXDC1,IFT20,NPHP4
8_Member	GO Biological Processes	GO:1902750	negative regulation of cell cycle G2/M phase transition	-2.34549	-0.628819	13/105	672,1111,5699,5706,5708,5711,5715,5719,9555,10197,10213,23198,51347	BRCA1,CHEK1,PSMB10,PSMC6,PSMD2,PSMD5,PSMD9,PSMD13,MACROH2A1,PSME3,PSMD14,PSME4,TAOK3
5_Member	GO Biological Processes	GO:1901991	negative regulation of mitotic cell cycle phase transition	-2.34216	-0.628819	24/248	596,672,835,995,1019,1031,3275,4085,5371,5699,5706,5708,5711,5715,5719,6347,8738,10197,10213,23198,25904,51347,54908,56155	BCL2,BRCA1,CASP2,CDC25C,CDK4,CDKN2C,PRMT2,MAD2L1,PML,PSMB10,PSMC6,PSMD2,PSMD5,PSMD9,PSMD13,CCL2,CRADD,PSME3,PSMD14,PSME4,CNOT10,TAOK3,SPDL1,TEX14
8_Member	GO Biological Processes	GO:0042180	cellular ketone metabolic process	-2.34216	-0.628819	24/248	672,972,1181,2232,2820,2954,5019,5699,5706,5708,5711,5715,5719,7376,8564,9612,10197,10213,10901,11277,23198,55066,134429,254013	BRCA1,CD74,CLCN2,FDXR,GPD2,GSTZ1,OXCT1,PSMB10,PSMC6,PSMD2,PSMD5,PSMD9,PSMD13,NR1H2,KMO,NCOR2,PSME3,PSMD14,DHRS4,TREX1,PSME4,PDPR,STARD4,ETFBKMT
2_Member	GO Biological Processes	GO:0031062	positive regulation of histone methylation	-2.33952	-0.628819	7/39	672,1789,4297,5252,22823,54904,94104	BRCA1,DNMT3B,KMT2A,PHF1,MTF2,NSD3,PAXBP1
4_Member	GO Biological Processes	GO:0046700	heterocycle catabolic process	-2.33786	-0.628819	55/705	272,955,1677,1773,1981,2592,2668,3607,4615,5141,5142,5208,5209,5562,5699,5706,5708,5711,5715,5719,6171,6203,6396,6419,8021,8564,8604,8930,9582,10197,10213,10762,10767,10921,11277,11319,23198,23517,25904,27327,51441,51594,53371,54512,55802,65110,79023,79621,81929,83594,84153,84893,219988,221662,339123	AMPD3,ENTPD6,DFFB,DNASE1,EIF4G1,GALT,GDNF,FOXK2,MYD88,PDE4A,PDE4B,PFKFB2,PFKFB3,PRKAA1,PSMB10,PSMC6,PSMD2,PSMD5,PSMD9,PSMD13,RPL41,RPS9,SEC13,SETMAR,NUP214,KMO,SLC25A12,MBD4,APOBEC3B,PSME3,PSMD14,NUP50,HBS1L,RNPS1,TREX1,ECD,PSME4,MTREX,CNOT10,TNRC6A,YTHDF2,NBAS,NUP54,EXOSC4,DCP1A,UPF3A,NUP37,RNASEH2B,SEH1L,NUDT12,RNASEH2C,FBH1,PATL1,RBM24,JMJD8
8_Member	GO Biological Processes	GO:0010565	regulation of cellular ketone metabolic process	-2.33664	-0.628819	19/181	672,972,1181,2954,5699,5706,5708,5711,5715,5719,7376,9612,10197,10213,11277,23198,55066,134429,254013	BRCA1,CD74,CLCN2,GSTZ1,PSMB10,PSMC6,PSMD2,PSMD5,PSMD9,PSMD13,NR1H2,NCOR2,PSME3,PSMD14,TREX1,PSME4,PDPR,STARD4,ETFBKMT
8_Member	GO Biological Processes	GO:0198738	cell-cell signaling by wnt	-2.31687	-0.614829	43/524	898,1277,1452,1453,1456,1856,1950,2011,2889,3675,4300,4790,5204,5562,5699,5706,5708,5711,5715,5719,6934,7089,7090,7091,7249,8945,9209,10076,10197,10213,10856,23198,23213,27327,51366,53944,57447,57560,57658,64897,85458,90410,261734	CCNE1,COL1A1,CSNK1A1,CSNK1D,CSNK1G3,DVL2,EGF,MARK2,RAPGEF1,ITGA3,MLLT3,NFKB1,PFDN5,PRKAA1,PSMB10,PSMC6,PSMD2,PSMD5,PSMD9,PSMD13,TCF7L2,TLE2,TLE3,TLE4,TSC2,BTRC,LRRFIP2,PTPRU,PSME3,PSMD14,RUVBL2,PSME4,SULF1,TNRC6A,UBR5,CSNK1G1,NDRG2,IFT80,CALCOCO1,C12orf43,DIXDC1,IFT20,NPHP4
9_Member	GO Biological Processes	GO:0022618	ribonucleoprotein complex assembly	-2.31439	-0.614829	26/277	636,5562,6606,6635,7375,8487,8665,9092,9326,9733,10856,10978,11171,11218,27316,50628,51081,51631,51657,54496,55015,55164,55692,64963,130916,219988	BICD1,PRKAA1,SMN1,SNRPE,USP4,GEMIN2,EIF3F,SART1,ZNHIT3,SART3,RUVBL2,CLP1,STRAP,DDX20,RBMX,GEMIN4,MRPS7,LUC7L2,STYXL1,PRMT7,PRPF39,SHQ1,LUC7L,MRPS11,MTERF4,PATL1
9_Member	GO Biological Processes	GO:0071826	ribonucleoprotein complex subunit organization	-2.31435	-0.614829	27/291	636,5562,6606,6635,7375,8487,8665,9092,9326,9733,10856,10978,11171,11218,24144,27316,50628,51081,51631,51657,54496,55015,55164,55692,64963,130916,219988	BICD1,PRKAA1,SMN1,SNRPE,USP4,GEMIN2,EIF3F,SART1,ZNHIT3,SART3,RUVBL2,CLP1,STRAP,DDX20,TFIP11,RBMX,GEMIN4,MRPS7,LUC7L2,STYXL1,PRMT7,PRPF39,SHQ1,LUC7L,MRPS11,MTERF4,PATL1
8_Member	GO Biological Processes	GO:0038095	Fc-epsilon receptor signaling pathway	-2.30805	-0.611262	18/169	3551,4775,4790,5170,5595,5602,5699,5706,5708,5711,5715,5719,8517,8945,10197,10213,23118,23198	IKBKB,NFATC3,NFKB1,PDPK1,MAPK3,MAPK10,PSMB10,PSMC6,PSMD2,PSMD5,PSMD9,PSMD13,IKBKG,BTRC,PSME3,PSMD14,TAB2,PSME4
10_Member	GO Biological Processes	GO:0042157	lipoprotein metabolic process	-2.29733	-0.6019	15/131	3949,5289,9474,9487,10026,10400,23556,25782,26100,51604,54872,65258,79929,84885,127018	LDLR,PIK3C3,ATG5,PIGL,PIGK,PEMT,PIGN,RAB3GAP2,WIPI2,PIGT,PIGG,MPPE1,MAP6D1,ZDHHC12,LYPLAL1
4_Member	GO Biological Processes	GO:0009166	nucleotide catabolic process	-2.28522	-0.591143	19/183	272,3607,5141,5142,5208,5209,5562,6396,8021,8604,8930,10762,11277,11319,53371,79023,81929,83594,339123	AMPD3,FOXK2,PDE4A,PDE4B,PFKFB2,PFKFB3,PRKAA1,SEC13,NUP214,SLC25A12,MBD4,NUP50,TREX1,ECD,NUP54,NUP37,SEH1L,NUDT12,JMJD8
10_Member	GO Biological Processes	GO:0045017	glycerolipid biosynthetic process	-2.27746	-0.586083	24/251	3631,3949,5130,5289,5298,7376,8904,9487,9791,10026,10390,10400,23556,27440,51205,51604,54872,56910,64419,65258,66036,81579,132001,376497	INPP4A,LDLR,PCYT1A,PIK3C3,PI4KB,NR1H2,CPNE1,PIGL,PTDSS1,PIGK,CEPT1,PEMT,PIGN,HDHD5,ACP6,PIGT,PIGG,STARD7,MTMR14,MPPE1,MTMR9,PLA2G12A,TAMM41,SLC27A1
10_Member	GO Biological Processes	GO:0042158	lipoprotein biosynthetic process	-2.2755	-0.585971	12/95	5289,9474,9487,10026,23556,25782,26100,51604,54872,65258,79929,84885	PIK3C3,ATG5,PIGL,PIGK,PIGN,RAB3GAP2,WIPI2,PIGT,PIGG,MPPE1,MAP6D1,ZDHHC12
4_Member	GO Biological Processes	GO:0009206	purine ribonucleoside triphosphate biosynthetic process	-2.25507	-0.571673	18/171	498,516,3607,4832,5208,5209,5562,6396,8021,8604,10762,11277,11319,53371,56848,79023,81929,339123	ATP5F1A,ATP5MC1,FOXK2,NME3,PFKFB2,PFKFB3,PRKAA1,SEC13,NUP214,SLC25A12,NUP50,TREX1,ECD,NUP54,SPHK2,NUP37,SEH1L,JMJD8
4_Member	GO Biological Processes	GO:0043467	regulation of generation of precursor metabolites and energy	-2.25394	-0.571673	17/158	3795,5208,5209,5562,6396,8021,8604,10762,11277,11319,23479,53371,56848,79023,81929,254013,339123	KHK,PFKFB2,PFKFB3,PRKAA1,SEC13,NUP214,SLC25A12,NUP50,TREX1,ECD,ISCU,NUP54,SPHK2,NUP37,SEH1L,ETFBKMT,JMJD8
10_Member	GO Biological Processes	GO:0006506	GPI anchor biosynthetic process	-2.23678	-0.562541	6/31	9487,10026,23556,51604,54872,65258	PIGL,PIGK,PIGN,PIGT,PIGG,MPPE1
5_Member	GO Biological Processes	GO:0045930	negative regulation of mitotic cell cycle	-2.2324	-0.559448	30/338	596,604,672,835,995,1019,1031,1111,3275,4085,5371,5699,5706,5708,5711,5715,5719,6347,6419,8738,10197,10213,10950,23087,23198,25904,51347,54908,56155,146691	BCL2,BCL6,BRCA1,CASP2,CDC25C,CDK4,CDKN2C,CHEK1,PRMT2,MAD2L1,PML,PSMB10,PSMC6,PSMD2,PSMD5,PSMD9,PSMD13,CCL2,SETMAR,CRADD,PSME3,PSMD14,BTG3,TRIM35,PSME4,CNOT10,TAOK3,SPDL1,TEX14,TOM1L2
4_Member	GO Biological Processes	GO:0009145	purine nucleoside triphosphate biosynthetic process	-2.22902	-0.557364	18/172	498,516,3607,4832,5208,5209,5562,6396,8021,8604,10762,11277,11319,53371,56848,79023,81929,339123	ATP5F1A,ATP5MC1,FOXK2,NME3,PFKFB2,PFKFB3,PRKAA1,SEC13,NUP214,SLC25A12,NUP50,TREX1,ECD,NUP54,SPHK2,NUP37,SEH1L,JMJD8
4_Member	GO Biological Processes	GO:0034404	nucleobase-containing small molecule biosynthetic process	-2.22298	-0.552606	22/226	272,353,3607,4832,5141,5142,5208,5209,5562,6396,7371,8021,8604,8930,10762,11277,11319,53371,79023,81929,83594,339123	AMPD3,APRT,FOXK2,NME3,PDE4A,PDE4B,PFKFB2,PFKFB3,PRKAA1,SEC13,UCK2,NUP214,SLC25A12,MBD4,NUP50,TREX1,ECD,NUP54,NUP37,SEH1L,NUDT12,JMJD8
8_Member	GO Biological Processes	GO:0006521	regulation of cellular amino acid metabolic process	-2.21879	-0.549692	9/62	5699,5706,5708,5711,5715,5719,10197,10213,23198	PSMB10,PSMC6,PSMD2,PSMD5,PSMD9,PSMD13,PSME3,PSMD14,PSME4
8_Member	GO Biological Processes	GO:0090263	positive regulation of canonical Wnt signaling pathway	-2.20058	-0.534539	16/147	1277,1453,1456,1950,4790,5699,5706,5708,5711,5715,5719,10197,10213,23198,51366,53944	COL1A1,CSNK1D,CSNK1G3,EGF,NFKB1,PSMB10,PSMC6,PSMD2,PSMD5,PSMD9,PSMD13,PSME3,PSMD14,PSME4,UBR5,CSNK1G1
4_Member	GO Biological Processes	GO:0006754	ATP biosynthetic process	-2.19982	-0.534539	17/160	498,516,3607,5208,5209,5562,6396,8021,8604,10762,11277,11319,53371,56848,79023,81929,339123	ATP5F1A,ATP5MC1,FOXK2,PFKFB2,PFKFB3,PRKAA1,SEC13,NUP214,SLC25A12,NUP50,TREX1,ECD,NUP54,SPHK2,NUP37,SEH1L,JMJD8
2_Member	GO Biological Processes	GO:2001252	positive regulation of chromosome organization	-2.17778	-0.518781	18/174	604,672,1789,4297,5252,5371,5595,6421,9555,9733,10694,10856,22823,25865,51535,54904,56848,94104	BCL6,BRCA1,DNMT3B,KMT2A,PHF1,PML,MAPK3,SFPQ,MACROH2A1,SART3,CCT8,RUVBL2,MTF2,PRKD2,PPHLN1,NSD3,SPHK2,PAXBP1
10_Member	GO Biological Processes	GO:0046488	phosphatidylinositol metabolic process	-2.17778	-0.518781	18/174	1154,3613,3631,5289,5298,8835,9487,10026,23556,51447,51604,54872,57217,64419,65258,66036,81579,376497	CISH,IMPA2,INPP4A,PIK3C3,PI4KB,SOCS2,PIGL,PIGK,PIGN,IP6K2,PIGT,PIGG,TTC7A,MTMR14,MPPE1,MTMR9,PLA2G12A,SLC27A1
10_Member	GO Biological Processes	GO:0006505	GPI anchor metabolic process	-2.16664	-0.512604	6/32	9487,10026,23556,51604,54872,65258	PIGL,PIGK,PIGN,PIGT,PIGG,MPPE1
4_Member	GO Biological Processes	GO:0009142	nucleoside triphosphate biosynthetic process	-2.16128	-0.509705	19/188	498,516,3607,4832,5208,5209,5562,6396,7371,8021,8604,10762,11277,11319,53371,56848,79023,81929,339123	ATP5F1A,ATP5MC1,FOXK2,NME3,PFKFB2,PFKFB3,PRKAA1,SEC13,UCK2,NUP214,SLC25A12,NUP50,TREX1,ECD,NUP54,SPHK2,NUP37,SEH1L,JMJD8
4_Member	GO Biological Processes	GO:1901292	nucleoside phosphate catabolic process	-2.13726	-0.499484	19/189	272,3607,5141,5142,5208,5209,5562,6396,8021,8604,8930,10762,11277,11319,53371,79023,81929,83594,339123	AMPD3,FOXK2,PDE4A,PDE4B,PFKFB2,PFKFB3,PRKAA1,SEC13,NUP214,SLC25A12,MBD4,NUP50,TREX1,ECD,NUP54,NUP37,SEH1L,NUDT12,JMJD8
15_Member	GO Biological Processes	GO:0006390	mitochondrial transcription	-2.13658	-0.499484	4/15	5562,79736,130916,133522	PRKAA1,TEFM,MTERF4,PPARGC1B
8_Member	GO Biological Processes	GO:0048002	antigen processing and presentation of peptide antigen	-2.11348	-0.481109	19/190	972,1535,2209,3551,5699,5706,5708,5711,5715,5719,6396,8517,8773,8907,9871,10197,10213,23198,83547	CD74,CYBA,FCGR1A,IKBKB,PSMB10,PSMC6,PSMD2,PSMD5,PSMD9,PSMD13,SEC13,IKBKG,SNAP23,AP1M1,SEC24D,PSME3,PSMD14,PSME4,RILP
8_Member	GO Biological Processes	GO:0031349	positive regulation of defense response	-2.10502	-0.476157	42/524	975,1508,1535,3551,3845,3949,4277,4363,4615,4790,4795,5170,5289,5595,5699,5706,5708,5711,5715,5719,6421,7321,8517,8717,8723,8945,9575,10197,10213,10497,23098,23118,23151,23198,23705,26007,55765,57402,63906,81622,83666,85363	CD81,CTSB,CYBA,IKBKB,KRAS,LDLR,MICB,ABCC1,MYD88,NFKB1,NFKBIL1,PDPK1,PIK3C3,MAPK3,PSMB10,PSMC6,PSMD2,PSMD5,PSMD9,PSMD13,SFPQ,UBE2D1,IKBKG,TRADD,SNX4,BTRC,CLOCK,PSME3,PSMD14,UNC13B,SARM1,TAB2,GRAMD4,PSME4,CADM1,TKFC,INAVA,S100A14,GPATCH3,UNC93B1,PARP9,TRIM5
10_Member	GO Biological Processes	GO:0009247	glycolipid biosynthetic process	-2.08401	-0.458619	9/65	2583,5562,9487,10026,23556,51604,54872,65258,79152	B4GALNT1,PRKAA1,PIGL,PIGK,PIGN,PIGT,PIGG,MPPE1,FA2H
8_Member	GO Biological Processes	GO:0061418	regulation of transcription from RNA polymerase II promoter in response to hypoxia	-2.06397	-0.443179	10/77	5699,5706,5708,5711,5715,5719,10197,10213,23198,112399	PSMB10,PSMC6,PSMD2,PSMD5,PSMD9,PSMD13,PSME3,PSMD14,PSME4,EGLN3
8_Member	GO Biological Processes	GO:0043620	regulation of DNA-templated transcription in response to stress	-2.03825	-0.425376	14/127	1111,3299,4690,5699,5706,5708,5711,5715,5719,6195,10197,10213,23198,112399	CHEK1,HSF4,NCK1,PSMB10,PSMC6,PSMD2,PSMD5,PSMD9,PSMD13,RPS6KA1,PSME3,PSMD14,PSME4,EGLN3
4_Member	GO Biological Processes	GO:0006096	glycolytic process	-2.0167	-0.412719	13/115	3607,5208,5209,5562,6396,8021,10762,11277,11319,53371,79023,81929,339123	FOXK2,PFKFB2,PFKFB3,PRKAA1,SEC13,NUP214,NUP50,TREX1,ECD,NUP54,NUP37,SEH1L,JMJD8
13_Member	GO Biological Processes	GO:1901605	alpha-amino acid metabolic process	-1.99046	-0.395187	21/223	642,2618,2730,2954,4357,4522,5092,5860,6470,8564,8604,10400,10768,23382,29920,56922,64087,80150,89874,112399,441024	BLMH,GART,GCLM,GSTZ1,MPST,MTHFD1,PCBD1,QDPR,SHMT1,KMO,SLC25A12,PEMT,AHCYL1,AHCYL2,PYCR2,MCCC1,MCCC2,ASRGL1,SLC25A21,EGLN3,MTHFD2L
4_Member	GO Biological Processes	GO:0006757	ATP generation from ADP	-1.98654	-0.393416	13/116	3607,5208,5209,5562,6396,8021,10762,11277,11319,53371,79023,81929,339123	FOXK2,PFKFB2,PFKFB3,PRKAA1,SEC13,NUP214,NUP50,TREX1,ECD,NUP54,NUP37,SEH1L,JMJD8
8_Member	GO Biological Processes	GO:0002429	immune response-activating cell surface receptor signaling pathway	-1.97221	-0.389681	38/473	596,975,1793,1997,2209,2633,2889,3551,3783,3845,3958,3984,4277,4690,4790,5142,5170,5595,5699,5706,5708,5711,5715,5719,7456,8517,8945,10006,10197,10213,10458,23118,23198,25865,26999,29085,51517,147179	BCL2,CD81,DOCK1,ELF1,FCGR1A,GBP1,RAPGEF1,IKBKB,KCNN4,KRAS,LGALS3,LIMK1,MICB,NCK1,NFKB1,PDE4B,PDPK1,MAPK3,PSMB10,PSMC6,PSMD2,PSMD5,PSMD9,PSMD13,WIPF1,IKBKG,BTRC,ABI1,PSME3,PSMD14,BAIAP2,TAB2,PSME4,PRKD2,CYFIP2,PHPT1,NCKIPSD,WIPF2
19_Member	GO Biological Processes	GO:0010822	positive regulation of mitochondrion organization	-1.95683	-0.380539	13/117	572,596,5562,7159,7161,9776,9927,10059,27429,54471,79778,89781,90427	BAD,BCL2,PRKAA1,TP53BP2,TP73,ATG13,MFN2,DNM1L,HTRA2,MIEF1,MICALL2,HPS4,BMF
8_Member	GO Biological Processes	GO:0002768	immune response-regulating cell surface receptor signaling pathway	-1.93801	-0.36582	40/506	596,975,1793,1997,2209,2633,2889,3551,3783,3845,3958,3984,4277,4690,4775,4790,5142,5170,5595,5602,5699,5706,5708,5711,5715,5719,7456,8517,8945,10006,10197,10213,10458,23118,23198,25865,26999,29085,51517,147179	BCL2,CD81,DOCK1,ELF1,FCGR1A,GBP1,RAPGEF1,IKBKB,KCNN4,KRAS,LGALS3,LIMK1,MICB,NCK1,NFATC3,NFKB1,PDE4B,PDPK1,MAPK3,MAPK10,PSMB10,PSMC6,PSMD2,PSMD5,PSMD9,PSMD13,WIPF1,IKBKG,BTRC,ABI1,PSME3,PSMD14,BAIAP2,TAB2,PSME4,PRKD2,CYFIP2,PHPT1,NCKIPSD,WIPF2
8_Member	GO Biological Processes	GO:0010972	negative regulation of G2/M transition of mitotic cell cycle	-1.92165	-0.357564	11/93	672,5699,5706,5708,5711,5715,5719,10197,10213,23198,51347	BRCA1,PSMB10,PSMC6,PSMD2,PSMD5,PSMD9,PSMD13,PSME3,PSMD14,PSME4,TAOK3
8_Member	GO Biological Processes	GO:0061013	regulation of mRNA catabolic process	-1.91026	-0.349166	19/199	1981,2668,4615,5699,5706,5708,5711,5715,5719,8021,10197,10213,23198,27327,51441,51594,54512,55802,221662	EIF4G1,GDNF,MYD88,PSMB10,PSMC6,PSMD2,PSMD5,PSMD9,PSMD13,NUP214,PSME3,PSMD14,PSME4,TNRC6A,YTHDF2,NBAS,EXOSC4,DCP1A,RBM24
8_Member	GO Biological Processes	GO:0002253	activation of immune response	-1.9019	-0.342793	54/727	596,975,1508,1535,1793,1997,2209,2633,2889,3551,3783,3845,3958,3984,4277,4615,4690,4790,4795,5142,5170,5289,5595,5699,5706,5708,5711,5715,5719,6421,7321,7456,8517,8945,10006,10197,10213,10458,11277,23098,23118,23151,23198,25865,26007,26999,29085,51517,55765,57402,63906,81622,85363,147179	BCL2,CD81,CTSB,CYBA,DOCK1,ELF1,FCGR1A,GBP1,RAPGEF1,IKBKB,KCNN4,KRAS,LGALS3,LIMK1,MICB,MYD88,NCK1,NFKB1,NFKBIL1,PDE4B,PDPK1,PIK3C3,MAPK3,PSMB10,PSMC6,PSMD2,PSMD5,PSMD9,PSMD13,SFPQ,UBE2D1,WIPF1,IKBKG,BTRC,ABI1,PSME3,PSMD14,BAIAP2,TREX1,SARM1,TAB2,GRAMD4,PSME4,PRKD2,TKFC,CYFIP2,PHPT1,NCKIPSD,INAVA,S100A14,GPATCH3,UNC93B1,TRIM5,WIPF2
4_Member	GO Biological Processes	GO:0042866	pyruvate biosynthetic process	-1.89876	-0.341433	13/119	3607,5208,5209,5562,6396,8021,10762,11277,11319,53371,79023,81929,339123	FOXK2,PFKFB2,PFKFB3,PRKAA1,SEC13,NUP214,NUP50,TREX1,ECD,NUP54,NUP37,SEH1L,JMJD8
6_Member	GO Biological Processes	GO:0051656	establishment of organelle localization	-1.88594	-0.329822	40/510	135,636,1058,1453,3566,4085,4134,5108,5170,5217,5590,5873,6396,7039,8517,8546,8723,8773,9527,9871,10059,10497,23095,26286,51134,51760,54820,54874,54908,55212,55291,56288,56848,79083,80179,81929,84062,140730,153241,201294	ADORA2A,BICD1,CENPA,CSNK1D,IL4R,MAD2L1,MAP4,PCM1,PDPK1,PFN2,PRKCZ,RAB27A,SEC13,TGFA,IKBKG,AP3B1,SNX4,SNAP23,GOSR1,SEC24D,DNM1L,UNC13B,KIF1B,ARFGAP3,CEP83,SYT17,NDE1,FNBP1L,SPDL1,BBS7,PPP6R3,PARD3,SPHK2,MLPH,MYO19,SEH1L,DTNBP1,RIMS4,CEP120,UNC13D
8_Member	GO Biological Processes	GO:0048863	stem cell differentiation	-1.85979	-0.317587	23/258	2627,2668,3911,4297,5595,5699,5706,5708,5711,5715,5719,6929,7161,10197,10213,10505,22823,23198,51441,57556,57715,124540,221662	GATA6,GDNF,LAMA5,KMT2A,MAPK3,PSMB10,PSMC6,PSMD2,PSMD5,PSMD9,PSMD13,TCF3,TP73,PSME3,PSMD14,SEMA4F,MTF2,PSME4,YTHDF2,SEMA6A,SEMA4G,MSI2,RBM24
2_Member	GO Biological Processes	GO:0051569	regulation of histone H3-K4 methylation	-1.85575	-0.317587	5/27	672,1789,4297,9555,9757	BRCA1,DNMT3B,KMT2A,MACROH2A1,KMT2B
13_Member	GO Biological Processes	GO:0006730	one-carbon metabolic process	-1.85575	-0.317587	5/27	4522,6470,10768,23382,441024	MTHFD1,SHMT1,AHCYL1,AHCYL2,MTHFD2L
4_Member	GO Biological Processes	GO:0006165	nucleoside diphosphate phosphorylation	-1.84536	-0.317587	14/134	3607,4832,5208,5209,5562,6396,8021,10762,11277,11319,53371,79023,81929,339123	FOXK2,NME3,PFKFB2,PFKFB3,PRKAA1,SEC13,NUP214,NUP50,TREX1,ECD,NUP54,NUP37,SEH1L,JMJD8
13_Member	GO Biological Processes	GO:0009069	serine family amino acid metabolic process	-1.84262	-0.317587	7/48	2618,2730,4357,4522,6470,10768,23382	GART,GCLM,MPST,MTHFD1,SHMT1,AHCYL1,AHCYL2
8_Member	GO Biological Processes	GO:0043618	regulation of transcription from RNA polymerase II promoter in response to stress	-1.84242	-0.317587	13/121	1111,3299,4690,5699,5706,5708,5711,5715,5719,10197,10213,23198,112399	CHEK1,HSF4,NCK1,PSMB10,PSMC6,PSMD2,PSMD5,PSMD9,PSMD13,PSME3,PSMD14,PSME4,EGLN3
16_Member	GO Biological Processes	GO:0002098	tRNA wobble uridine modification	-1.84232	-0.317587	4/18	25821,84705,91801,285381	MTO1,GTPBP3,ALKBH8,DPH3
13_Member	GO Biological Processes	GO:0046498	S-adenosylhomocysteine metabolic process	-1.84204	-0.317587	3/10	10400,10768,23382	PEMT,AHCYL1,AHCYL2
19_Member	GO Biological Processes	GO:1903747	regulation of establishment of protein localization to mitochondrion	-1.80444	-0.292124	9/72	572,596,5562,7159,7161,9776,27429,79778,89781	BAD,BCL2,PRKAA1,TP53BP2,TP73,ATG13,HTRA2,MICALL2,HPS4
4_Member	GO Biological Processes	GO:0005975	carbohydrate metabolic process	-1.79947	-0.289976	47/626	572,1950,2583,2592,2820,2997,3417,3607,3613,3795,4790,5208,5209,5562,6396,6888,7355,8021,8505,8604,8908,9526,9653,10585,10678,10762,11277,11319,23509,26007,26509,53371,54187,55276,55347,55512,57223,64080,79023,81929,84750,84912,132789,197258,284004,339123,414328	BAD,EGF,B4GALNT1,GALT,GPD2,GYS1,IDH1,FOXK2,IMPA2,KHK,NFKB1,PFKFB2,PFKFB3,PRKAA1,SEC13,TALDO1,SLC35A2,NUP214,PARG,SLC25A12,GYG2,MPDU1,HS2ST1,POMT1,B3GNT2,NUP50,TREX1,ECD,POFUT1,TKFC,MYOF,NUP54,NANS,PGM2,ABHD10,SMPD3,PPP4R3B,RBKS,NUP37,SEH1L,FUT10,SLC35B4,GNPDA2,FCSK,HEXD,JMJD8,IDNK
4_Member	GO Biological Processes	GO:0046939	nucleotide phosphorylation	-1.79362	-0.285483	14/136	3607,4832,5208,5209,5562,6396,8021,10762,11277,11319,53371,79023,81929,339123	FOXK2,NME3,PFKFB2,PFKFB3,PRKAA1,SEC13,NUP214,NUP50,TREX1,ECD,NUP54,NUP37,SEH1L,JMJD8
8_Member	GO Biological Processes	GO:0043488	regulation of mRNA stability	-1.78714	-0.284625	17/177	1981,2668,4615,5699,5706,5708,5711,5715,5719,8021,10197,10213,23198,51441,54512,55802,221662	EIF4G1,GDNF,MYD88,PSMB10,PSMC6,PSMD2,PSMD5,PSMD9,PSMD13,NUP214,PSME3,PSMD14,PSME4,YTHDF2,EXOSC4,DCP1A,RBM24
10_Member	GO Biological Processes	GO:0006664	glycolipid metabolic process	-1.7871	-0.284625	12/110	410,2583,5562,9487,10026,23556,51604,54872,54982,55512,65258,79152	ARSA,B4GALNT1,PRKAA1,PIGL,PIGK,PIGN,PIGT,PIGG,CLN6,SMPD3,MPPE1,FA2H
8_Member	GO Biological Processes	GO:0035567	non-canonical Wnt signaling pathway	-1.77927	-0.278535	15/150	1453,1856,4300,5699,5706,5708,5711,5715,5719,6934,10197,10213,23198,27327,57560	CSNK1D,DVL2,MLLT3,PSMB10,PSMC6,PSMD2,PSMD5,PSMD9,PSMD13,TCF7L2,PSME3,PSMD14,PSME4,TNRC6A,IFT80
19_Member	GO Biological Processes	GO:0006626	protein targeting to mitochondrion	-1.76299	-0.267888	11/98	5562,9776,9927,27429,29090,79778,83943,89781,130916,131118,401505	PRKAA1,ATG13,MFN2,HTRA2,TIMM21,MICALL2,IMMP2L,HPS4,MTERF4,DNAJC19,TOMM5
10_Member	GO Biological Processes	GO:1903509	liposaccharide metabolic process	-1.75866	-0.267888	12/111	410,2583,5562,9487,10026,23556,51604,54872,54982,55512,65258,79152	ARSA,B4GALNT1,PRKAA1,PIGL,PIGK,PIGN,PIGT,PIGG,CLN6,SMPD3,MPPE1,FA2H
13_Member	GO Biological Processes	GO:0006534	cysteine metabolic process	-1.75835	-0.267888	4/19	2730,4357,10768,23382	GCLM,MPST,AHCYL1,AHCYL2
13_Member	GO Biological Processes	GO:0006555	methionine metabolic process	-1.75835	-0.267888	4/19	4522,10768,23382,441024	MTHFD1,AHCYL1,AHCYL2,MTHFD2L
8_Member	GO Biological Processes	GO:1905330	regulation of morphogenesis of an epithelium	-1.72231	-0.254009	17/180	367,1856,2668,4300,5699,5706,5708,5711,5715,5719,10197,10213,23198,23213,54806,81792,388591	AR,DVL2,GDNF,MLLT3,PSMB10,PSMC6,PSMD2,PSMD5,PSMD9,PSMD13,PSME3,PSMD14,PSME4,SULF1,AHI1,ADAMTS12,RNF207
2_Member	GO Biological Processes	GO:0061085	regulation of histone H3-K27 methylation	-1.72139	-0.254009	3/11	5252,9555,22823	PHF1,MACROH2A1,MTF2
19_Member	GO Biological Processes	GO:0010821	regulation of mitochondrion organization	-1.68029	-0.224587	17/182	572,596,5562,7159,7161,7249,9776,9927,10059,27429,54471,65084,79778,80179,89781,90427,96459	BAD,BCL2,PRKAA1,TP53BP2,TP73,TSC2,ATG13,MFN2,DNM1L,HTRA2,MIEF1,TMEM135,MICALL2,MYO19,HPS4,BMF,FNIP1
20_Member	GO Biological Processes	GO:0000422	autophagy of mitochondrion	-1.6636	-0.215076	9/76	2011,7249,9474,9776,9927,10059,26100,27429,132671	MARK2,TSC2,ATG5,ATG13,MFN2,DNM1L,WIPI2,HTRA2,SPATA18
20_Member	GO Biological Processes	GO:0061726	mitochondrion disassembly	-1.6636	-0.215076	9/76	2011,7249,9474,9776,9927,10059,26100,27429,132671	MARK2,TSC2,ATG5,ATG13,MFN2,DNM1L,WIPI2,HTRA2,SPATA18
8_Member	GO Biological Processes	GO:0043487	regulation of RNA stability	-1.65964	-0.213414	17/183	1981,2668,4615,5699,5706,5708,5711,5715,5719,8021,10197,10213,23198,51441,54512,55802,221662	EIF4G1,GDNF,MYD88,PSMB10,PSMC6,PSMD2,PSMD5,PSMD9,PSMD13,NUP214,PSME3,PSMD14,PSME4,YTHDF2,EXOSC4,DCP1A,RBM24
14_Member	GO Biological Processes	GO:0061136	regulation of proteasomal protein catabolic process	-1.65964	-0.213414	17/183	369,1452,1453,4287,6815,7341,8945,9097,10197,10213,10221,10869,10956,25898,55212,160418,337867	ARAF,CSNK1A1,CSNK1D,ATXN3,STYX,SUMO1,BTRC,USP14,PSME3,PSMD14,TRIB1,USP19,OS9,RCHY1,BBS7,TMTC3,UBAC2
17_Member	GO Biological Processes	GO:0016236	macroautophagy	-1.64405	-0.203143	25/300	5289,5562,5595,7249,8517,9474,9776,9927,10542,11267,23001,23241,25782,26100,27429,51368,55048,55763,57535,64121,64419,80700,90410,93343,401505	PIK3C3,PRKAA1,MAPK3,TSC2,IKBKG,ATG5,ATG13,MFN2,LAMTOR5,SNF8,WDFY3,PACS2,RAB3GAP2,WIPI2,HTRA2,TEX264,VPS37C,EXOC1,KIAA1324,RRAGC,MTMR14,UBXN6,IFT20,MVB12A,TOMM5
8_Member	GO Biological Processes	GO:0001738	morphogenesis of a polarized epithelium	-1.62337	-0.190033	14/143	1856,3911,4300,5699,5706,5708,5711,5715,5719,10197,10213,23198,54806,90410	DVL2,LAMA5,MLLT3,PSMB10,PSMC6,PSMD2,PSMD5,PSMD9,PSMD13,PSME3,PSMD14,PSME4,AHI1,IFT20
10_Member	GO Biological Processes	GO:0006661	phosphatidylinositol biosynthetic process	-1.62311	-0.190033	12/116	3631,5289,5298,9487,10026,23556,51604,54872,64419,65258,66036,376497	INPP4A,PIK3C3,PI4KB,PIGL,PIGK,PIGN,PIGT,PIGG,MTMR14,MPPE1,MTMR9,SLC27A1
8_Member	GO Biological Processes	GO:0043687	post-translational protein modification	-1.6172	-0.188718	29/362	334,813,1154,5699,5706,5708,5711,5715,5719,7466,8835,8945,9039,9040,9318,9474,10130,10197,10213,10980,23198,26100,50717,51088,54850,54876,80067,90293,90864	APLP2,CALU,CISH,PSMB10,PSMC6,PSMD2,PSMD5,PSMD9,PSMD13,WFS1,SOCS2,BTRC,UBA3,UBE2M,COPS2,ATG5,PDIA6,PSME3,PSMD14,COPS6,PSME4,WIPI2,DCAF8,KLHL5,FBXL12,DCAF16,DCAF17,KLHL13,SPSB3
8_Member	GO Biological Processes	GO:0002221	pattern recognition receptor signaling pathway	-1.60395	-0.182974	18/200	1508,1535,3551,4615,4795,5170,5289,7321,8517,23098,23118,23151,26007,55765,57402,63906,81622,85363	CTSB,CYBA,IKBKB,MYD88,NFKBIL1,PDPK1,PIK3C3,UBE2D1,IKBKG,SARM1,TAB2,GRAMD4,TKFC,INAVA,S100A14,GPATCH3,UNC93B1,TRIM5
12_Member	GO Biological Processes	GO:0070507	regulation of microtubule cytoskeleton organization	-1.59907	-0.18025	17/186	636,672,1111,2011,2258,5562,6491,8045,10274,25886,26973,57787,79598,79929,85458,153241,157922	BICD1,BRCA1,CHEK1,MARK2,FGF13,PRKAA1,STIL,RASSF7,STAG1,POC1A,CHORDC1,MARK4,CEP97,MAP6D1,DIXDC1,CEP120,CAMSAP1
14_Member	GO Biological Processes	GO:1903050	regulation of proteolysis involved in cellular protein catabolic process	-1.59229	-0.174182	19/215	369,1452,1453,1950,4287,5371,6815,7341,8945,9097,10197,10213,10221,10869,10956,25898,55212,160418,337867	ARAF,CSNK1A1,CSNK1D,EGF,ATXN3,PML,STYX,SUMO1,BTRC,USP14,PSME3,PSMD14,TRIB1,USP19,OS9,RCHY1,BBS7,TMTC3,UBAC2
19_Member	GO Biological Processes	GO:1903955	positive regulation of protein targeting to mitochondrion	-1.55537	-0.144949	5/32	5562,9776,27429,79778,89781	PRKAA1,ATG13,HTRA2,MICALL2,HPS4
2_Member	GO Biological Processes	GO:2001251	negative regulation of chromosome organization	-1.55524	-0.144949	14/146	672,1789,4085,5252,6419,9474,9555,22823,23133,51366,54454,54908,56155,56848	BRCA1,DNMT3B,MAD2L1,PHF1,SETMAR,ATG5,MACROH2A1,MTF2,PHF8,UBR5,ATAD2B,SPDL1,TEX14,SPHK2
6_Member	GO Biological Processes	GO:0051650	establishment of vesicle localization	-1.55249	-0.144302	24/291	135,1453,5217,5590,5873,6396,7039,8517,8546,8773,9527,9871,10059,10497,23095,26286,51760,54820,54874,55212,55291,79083,84062,140730	ADORA2A,CSNK1D,PFN2,PRKCZ,RAB27A,SEC13,TGFA,IKBKG,AP3B1,SNAP23,GOSR1,SEC24D,DNM1L,UNC13B,KIF1B,ARFGAP3,SYT17,NDE1,FNBP1L,BBS7,PPP6R3,MLPH,DTNBP1,RIMS4
13_Member	GO Biological Processes	GO:0006575	cellular modified amino acid metabolic process	-1.54751	-0.141472	18/203	2618,2730,2879,2948,2954,3417,4522,6470,6573,9791,10400,10768,23382,23474,81579,112399,376497,441024	GART,GCLM,GPX4,GSTM4,GSTZ1,IDH1,MTHFD1,SHMT1,SLC19A1,PTDSS1,PEMT,AHCYL1,AHCYL2,ETHE1,PLA2G12A,EGLN3,SLC27A1,MTHFD2L
14_Member	GO Biological Processes	GO:1903362	regulation of cellular protein catabolic process	-1.54332	-0.141472	21/247	369,975,1452,1453,1950,3949,4287,5371,6815,7341,8945,9097,10197,10213,10221,10869,10956,25898,55212,160418,337867	ARAF,CD81,CSNK1A1,CSNK1D,EGF,LDLR,ATXN3,PML,STYX,SUMO1,BTRC,USP14,PSME3,PSMD14,TRIB1,USP19,OS9,RCHY1,BBS7,TMTC3,UBAC2
16_Member	GO Biological Processes	GO:0002097	tRNA wobble base modification	-1.53835	-0.141472	4/22	25821,84705,91801,285381	MTO1,GTPBP3,ALKBH8,DPH3
20_Member	GO Biological Processes	GO:0000423	mitophagy	-1.53835	-0.141472	4/22	7249,9776,9927,27429	TSC2,ATG13,MFN2,HTRA2
10_Member	GO Biological Processes	GO:0046486	glycerolipid metabolic process	-1.53791	-0.141472	32/414	1154,3613,3631,3949,5130,5289,5298,7376,8835,8904,9487,9791,10026,10390,10400,10908,23556,27440,51205,51447,51604,54872,56910,57217,64419,64788,65258,66036,81579,132001,255043,376497	CISH,IMPA2,INPP4A,LDLR,PCYT1A,PIK3C3,PI4KB,NR1H2,SOCS2,CPNE1,PIGL,PTDSS1,PIGK,CEPT1,PEMT,PNPLA6,PIGN,HDHD5,ACP6,IP6K2,PIGT,PIGG,STARD7,TTC7A,MTMR14,LMF1,MPPE1,MTMR9,PLA2G12A,TAMM41,TMEM86B,SLC27A1
16_Member	GO Biological Processes	GO:0090646	mitochondrial tRNA processing	-1.51765	-0.133975	3/13	9692,25821,158234	PRORP,MTO1,TRMT10B
8_Member	GO Biological Processes	GO:0071453	cellular response to oxygen levels	-1.51449	-0.132418	20/234	355,572,596,1789,2627,5562,5699,5706,5708,5711,5715,5719,8837,10059,10197,10213,10869,23198,112399,132864	FAS,BAD,BCL2,DNMT3B,GATA6,PRKAA1,PSMB10,PSMC6,PSMD2,PSMD5,PSMD9,PSMD13,CFLAR,DNM1L,PSME3,PSMD14,USP19,PSME4,EGLN3,CPEB2
5_Member	GO Biological Processes	GO:0000082	G1/S transition of mitotic cell cycle	-1.50698	-0.130008	23/279	596,835,898,995,1019,1022,1031,1876,1981,3275,3624,4678,5001,5371,6347,8738,10197,10926,11319,23133,25904,57695,143384	BCL2,CASP2,CCNE1,CDC25C,CDK4,CDK7,CDKN2C,E2F6,EIF4G1,PRMT2,INHBA,NASP,ORC5,PML,CCL2,CRADD,PSME3,DBF4,ECD,PHF8,CNOT10,USP37,CACUL1
2_Member	GO Biological Processes	GO:0051568	histone H3-K4 methylation	-1.50559	-0.130008	7/56	672,1789,4297,6419,9555,9757,30827	BRCA1,DNMT3B,KMT2A,SETMAR,MACROH2A1,KMT2B,CXXC1
8_Member	GO Biological Processes	GO:0033238	regulation of cellular amine metabolic process	-1.50406	-0.130008	9/81	5699,5706,5708,5711,5715,5719,10197,10213,23198	PSMB10,PSMC6,PSMD2,PSMD5,PSMD9,PSMD13,PSME3,PSMD14,PSME4
8_Member	GO Biological Processes	GO:0002224	toll-like receptor signaling pathway	-1.48983	-0.121759	14/149	1508,1535,3551,4615,4795,5170,5289,7321,8517,23098,23118,23151,57402,81622	CTSB,CYBA,IKBKB,MYD88,NFKBIL1,PDPK1,PIK3C3,UBE2D1,IKBKG,SARM1,TAB2,GRAMD4,S100A14,UNC93B1
8_Member	GO Biological Processes	GO:0060071	Wnt signaling pathway, planar cell polarity pathway	-1.48482	-0.117391	11/108	1856,4300,5699,5706,5708,5711,5715,5719,10197,10213,23198	DVL2,MLLT3,PSMB10,PSMC6,PSMD2,PSMD5,PSMD9,PSMD13,PSME3,PSMD14,PSME4
13_Member	GO Biological Processes	GO:0006790	sulfur compound metabolic process	-1.48233	-0.115536	29/372	642,686,2730,2879,2948,2954,3417,4357,4522,6817,6821,8803,9054,9374,10005,10400,10678,10768,23382,23474,23479,27158,51144,55066,56922,64087,64834,79178,441024	BLMH,BTD,GCLM,GPX4,GSTM4,GSTZ1,IDH1,MPST,MTHFD1,SULT1A1,SUOX,SUCLA2,NFS1,PPT2,ACOT8,PEMT,B3GNT2,AHCYL1,AHCYL2,ETHE1,ISCU,NDOR1,HSD17B12,PDPR,MCCC1,MCCC2,ELOVL1,THTPA,MTHFD2L
4_Member	GO Biological Processes	GO:0006633	fatty acid biosynthetic process	-1.45135	-0.0958752	15/165	672,972,2879,2948,4706,5562,5825,7376,9415,51102,51144,56624,64834,79152,127281	BRCA1,CD74,GPX4,GSTM4,NDUFAB1,PRKAA1,ABCD3,NR1H2,FADS2,MECR,HSD17B12,ASAH2,ELOVL1,FA2H,PRXL2B
8_Member	GO Biological Processes	GO:0090175	regulation of establishment of planar polarity	-1.43473	-0.0902955	11/110	1856,4300,5699,5706,5708,5711,5715,5719,10197,10213,23198	DVL2,MLLT3,PSMB10,PSMC6,PSMD2,PSMD5,PSMD9,PSMD13,PSME3,PSMD14,PSME4
12_Member	GO Biological Processes	GO:0046605	regulation of centrosome cycle	-1.4329	-0.0902955	7/58	672,1111,6491,25886,26973,57787,153241	BRCA1,CHEK1,STIL,POC1A,CHORDC1,MARK4,CEP120
8_Member	GO Biological Processes	GO:2000027	regulation of animal organ morphogenesis	-1.4307	-0.0902955	21/254	367,596,1856,2668,4300,5699,5706,5708,5711,5715,5719,7068,8837,10197,10213,23198,23213,54806,55000,93986,388591	AR,BCL2,DVL2,GDNF,MLLT3,PSMB10,PSMC6,PSMD2,PSMD5,PSMD9,PSMD13,THRB,CFLAR,PSME3,PSMD14,PSME4,SULF1,AHI1,TUG1,FOXP2,RNF207
8_Member	GO Biological Processes	GO:0001736	establishment of planar polarity	-1.42743	-0.0895844	12/124	1856,4300,5699,5706,5708,5711,5715,5719,10197,10213,23198,90410	DVL2,MLLT3,PSMB10,PSMC6,PSMD2,PSMD5,PSMD9,PSMD13,PSME3,PSMD14,PSME4,IFT20
8_Member	GO Biological Processes	GO:0007164	establishment of tissue polarity	-1.42743	-0.0895844	12/124	1856,4300,5699,5706,5708,5711,5715,5719,10197,10213,23198,90410	DVL2,MLLT3,PSMB10,PSMC6,PSMD2,PSMD5,PSMD9,PSMD13,PSME3,PSMD14,PSME4,IFT20
12_Member	GO Biological Processes	GO:0051493	regulation of cytoskeleton organization	-1.42373	-0.0871777	39/534	636,672,1111,2011,2059,2258,2764,3984,4690,5217,5345,5562,5595,5756,6491,7168,8045,10274,10458,23406,25886,26973,27289,29085,54828,55160,57175,57787,60312,64857,79598,79768,79929,85458,91663,130271,153241,157922,253725	BICD1,BRCA1,CHEK1,MARK2,EPS8,FGF13,GMFB,LIMK1,NCK1,PFN2,SERPINF2,PRKAA1,MAPK3,TWF1,STIL,TPM1,RASSF7,STAG1,BAIAP2,COTL1,POC1A,CHORDC1,RND1,PHPT1,BCAS3,ARHGEF10L,CORO1B,MARK4,AFAP1,PLEKHG2,CEP97,KATNBL1,MAP6D1,DIXDC1,MYADM,PLEKHH2,CEP120,CAMSAP1,WASHC2C
7_Member	GO Biological Processes	GO:0090630	activation of GTPase activity	-1.42271	-0.0871777	10/97	141,2889,9905,23216,23232,27352,54662,54828,83874,93627	ADPRH,RAPGEF1,SGSM2,TBC1D1,TBC1D12,SGSM3,TBC1D13,BCAS3,TBC1D10A,TBCK
8_Member	GO Biological Processes	GO:0050851	antigen receptor-mediated signaling pathway	-1.40967	-0.0783278	25/316	596,975,1997,2633,3551,3783,3958,4690,4790,5142,5170,5699,5706,5708,5711,5715,5719,8517,8945,10197,10213,23118,23198,25865,29085	BCL2,CD81,ELF1,GBP1,IKBKB,KCNN4,LGALS3,NCK1,NFKB1,PDE4B,PDPK1,PSMB10,PSMC6,PSMD2,PSMD5,PSMD9,PSMD13,IKBKG,BTRC,PSME3,PSMD14,TAB2,PSME4,PRKD2,PHPT1
19_Member	GO Biological Processes	GO:0006839	mitochondrial transport	-1.39986	-0.0743437	21/256	498,516,572,596,5562,7159,7161,8604,9016,9776,9927,27429,29090,79778,83943,89781,90427,123096,130916,131118,401505	ATP5F1A,ATP5MC1,BAD,BCL2,PRKAA1,TP53BP2,TP73,SLC25A12,SLC25A14,ATG13,MFN2,HTRA2,TIMM21,MICALL2,IMMP2L,HPS4,BMF,SLC25A29,MTERF4,DNAJC19,TOMM5
8_Member	GO Biological Processes	GO:0019221	cytokine-mediated signaling pathway	-1.37915	-0.0582465	55/798	572,596,604,817,972,1154,1997,2057,2209,2633,2889,3551,3566,3845,3911,3987,4050,4261,4615,4790,5371,5595,5699,5706,5708,5711,5715,5719,6347,6888,7297,7341,7376,7804,8517,8717,8835,8904,8945,10197,10213,10401,11277,23118,23198,29965,51330,51441,51447,54014,54739,83666,84817,85363,376497	BAD,BCL2,BCL6,CAMK2D,CD74,CISH,ELF1,EPOR,FCGR1A,GBP1,RAPGEF1,IKBKB,IL4R,KRAS,LAMA5,LIMS1,LTB,CIITA,MYD88,NFKB1,PML,MAPK3,PSMB10,PSMC6,PSMD2,PSMD5,PSMD9,PSMD13,CCL2,TALDO1,TYK2,SUMO1,NR1H2,LRP8,IKBKG,TRADD,SOCS2,CPNE1,BTRC,PSME3,PSMD14,PIAS3,TREX1,TAB2,PSME4,CDIP1,TNFRSF12A,YTHDF2,IP6K2,BRWD1,XAF1,PARP9,TXNDC17,TRIM5,SLC27A1
14_Member	GO Biological Processes	GO:0042176	regulation of protein catabolic process	-1.36893	-0.0496166	29/381	369,975,1452,1453,1950,3949,4085,4287,5371,5708,6815,7341,8945,9097,10197,10213,10221,10869,10956,11267,25807,25898,25976,27352,55212,83547,152503,160418,337867	ARAF,CD81,CSNK1A1,CSNK1D,EGF,LDLR,MAD2L1,ATXN3,PML,PSMD2,STYX,SUMO1,BTRC,USP14,PSME3,PSMD14,TRIB1,USP19,OS9,SNF8,RHBDD3,RCHY1,TIPARP,SGSM3,BBS7,RILP,SH3D19,TMTC3,UBAC2
6_Member	GO Biological Processes	GO:0051648	vesicle localization	-1.32364	-0.028854	24/307	135,1453,5217,5590,5873,6396,7039,8517,8546,8773,9527,9871,10059,10497,23095,26286,51760,54820,54874,55212,55291,79083,84062,140730	ADORA2A,CSNK1D,PFN2,PRKCZ,RAB27A,SEC13,TGFA,IKBKG,AP3B1,SNAP23,GOSR1,SEC24D,DNM1L,UNC13B,KIF1B,ARFGAP3,SYT17,NDE1,FNBP1L,BBS7,PPP6R3,MLPH,DTNBP1,RIMS4
20_Member	GO Biological Processes	GO:1903008	organelle disassembly	-1.3215	-0.0277974	10/101	2011,7249,9474,9776,9927,10059,26100,27429,51368,132671	MARK2,TSC2,ATG5,ATG13,MFN2,DNM1L,WIPI2,HTRA2,TEX264,SPATA18
8_Member	GO Biological Processes	GO:0036294	cellular response to decreased oxygen levels	-1.30679	-0.0195015	18/217	572,596,2627,5562,5699,5706,5708,5711,5715,5719,8837,10059,10197,10213,10869,23198,112399,132864	BAD,BCL2,GATA6,PRKAA1,PSMB10,PSMC6,PSMD2,PSMD5,PSMD9,PSMD13,CFLAR,DNM1L,PSME3,PSMD14,USP19,PSME4,EGLN3,CPEB2
