# Supplementary material
Source: Preprints.org preprint supplement (doi:10.20944/preprints202004.0323.v1)
Supplement: Supplementary file 1 [file supplementary › Supplementary_Table_11_RBP_binding_motif_enrichment_Analysis.xlsx]

## Sheet: PWMs_list
Comment: This Table contains the results of the RBP binding motif enrichment analysis performed for different alternative splicing events
The list of Position Wieght Matrices (PWMs) used for searching RBP binding motifs are referred to the studies below
References:
Ray, D.; Ha, K.C.H.; Nie, K.; Zheng, H.; Hughes, T.R.; Morris, Q.D. RNAcompete methodology and application to determine sequence preferences of unconventional RNA-binding proteins. Methods 2017, 118-119, 3–15.
Sebestyén, E.; Singh, B.; Miñana, B.; Pagès, A.; Mateo, F.; Pujana, M.A.; Valcárcel, J.; Eyras, E. Large-scale analysis of genome and transcriptome alterations in multiple tumors unveils novel cancer-relevant splicing networks. Genome Res. 2016, 26, 732–744.
PWMs_id	RBP_name
A1CF_00001	A1CF
ANKHD1_00002	ANKHD1
BRUNOL4_00004	CELF1
BRUNOL4_00004a	CELF2
BRUNOL4_00004b	CELF3
BRUNOL4_00004c	CELF4
BRUNOL5_00166	CELF5
BRUNOL6_00187	CELF6
CNOT4_00156	CNOT4
CPEB2_00012	CPEB1
CPEB4_00158	CPEB4
DAZAP1_00013	DAZAP1
ENOX1_00149	ENOX1
ESRP2_00150	ESRP1
ESRP2_00150a	ESRP2
FMR1_00016	FMR1
FUS_00018	FUS
FXR1_00161	FXR1
FXR2_00020	FXR2
G3BP2_00021	G3BP1
HNRNPA1_00022	HNRNPA1
HNRNPA1L2_00023	HNRNPA1L2
HNRNPA2B1_00024	HNRNPA2B1
HNRNPC_00025	HNRNPC
HNRNPCL1_00167	HNRNPCL1
HNRNPH2_00160	HNRNPH2
HNRNPK_00026	HNRNPK
HNRNPL_00027	HNRNPL
HNRNPL_00091	HNRNPL
HNRPLL_00178	HNRNPLL
HuR_00032	ELAVL1
HuR_00032a	ELAVL2
HuR_00032b	ELAVL3
HuR_00032c	ELAVL4
HuR_00112	ELAVL5
HuR_00117	ELAVL6
HuR_00136	ELAVL7
HuR_00274	ELAVL8
IGF2BP2_00033	IGF2BP1
IGF2BP2_00033a	IGF2BP2
IGF2BP3_00172	IGF2BP3
KHDRBS1_00062	KHDRBS1
KHDRBS2_00185	KHDRBS2
KHDRBS3_00034	KHDRBS3
LIN28A_00036	LIN28A
LIN28A_00162	LIN28A
MATR3_00037	MATR3
MBNL1_00038	MBNL1
MBNL1_00038a	MBNL2
MBNL1_00038b	MBNL3
MSI1_00041	MSI1
MSI1_00176	MSI1
PABPC1_00155	PABPC1
PABPC3_00153	PABPC3
PABPC4_00043	PABPC4
PABPC5_00171	PABPC5
PABPN1_00157	PABPN1
PCBP1_00186	PCBP1
PCBP2_00044	PCBP2
PCBP3_00215a	PCBP3
PPRC1_00045	PPRC1
PTBP1_00268	PTBP1
PTBP1_00268a	PTBP2
PTBP1_00269	PTBP3
QKI_00047	QKI
RALY_00159	RALY
RBFOX1_00168	RBFOX1
RBFOX1_00168a	RBFOX2
RBFOX1_00168b	RBFOX3
RBM24_00184	RBM24
RBM28_00049	RBM28
RBM3_00050	RBM3
Rbm38_00283a	RBM38
RBM4_00052	RBM4
RBM4_00113	RBM4
RBM42_00151	RBM42
RBM45_00241	RBM45
RBM46_00054	RBM46
RBM47_00279a	RBM47
RBM5_00055	RBM5
RBM5_00154	RBM5
RBM6_00170	RBM6
RBM8A_00056	RBM8A
RBMS1_00152	RBMS1
RBMS3_00057	RBMS3
RBMS3_00173	RBMS3
SAMD4A_00063	SAMD4A
SART3_00064	SART3
SF1_00065a	SF1
SFPQ_00177	SFPQ
SNRNP70_00070	SNRNP70
SNRPA_00071	SNRPA
SRP54_00272a	SRP54
SRSF1_00106	SRSF1
SRSF1_00107	SRSF1
SRSF1_00108	SRSF1
SRSF1_00109	SRSF1
SRSF1_00110	SRSF1
SRSF1_00163	SRSF1
SRSF10_00019	SRSF10
SRSF10_00088	SRSF10
SRSF10_00089	SRSF10
SRSF10_00090	SRSF10
SRSF2_00072	SRSF2
SRSF7_00073	SRSF7
SRSF9_00067	SRSF9
SRSF9_00074	SRSF9
TARDBP_00076	TARDBP
TIA1_00077	TIA1
TIA1_00165	TIA1
TIA1_00165a	TIAL1
TRA2_00078a	TRA2B
TUT1_00075	TUT1
U2AF2_00079	U2AF2
YBX1_00083	YBX1
YBX1_00116	YBX1
YBX2_00084	YBX2
ZC3H10_00085	ZC3H10
ZC3H14_00086	ZC3H14
ZCRB1_00087	ZCRB1
ZNF638_00164	ZNF638

## Sheet: RBP_SE_skipping
PWM_id	RBP_name	Regulation	Location	Enrichment (z-scroe)
HNRNPL_00027	HNRNPL	exclusion	upstream	40.8007
RBM5_00154	RBM5	exclusion	upstream	14.1641
RBM3_00050	RBM3	exclusion	upstream	12.5429
YBX1_00116	YBX1	exclusion	upstream	7.77888
FUS_00018	FUS	exclusion	upstream	5.54946
SRSF9_00074	SRSF9	exclusion	upstream	5.1644
FXR1_00161	FXR1	exclusion	upstream	5.06358
MATR3_00037	MATR3	exclusion	upstream	4.26218
RBM42_00151	RBM42	exclusion	upstream	3.86802
ZC3H10_00085	ZC3H10	exclusion	upstream	3.733
RBM6_00170	RBM6	exclusion	upstream	2.82152
RBM45_00241	RBM45	exclusion	upstream	2.58267
TRA2_00078a	TRA2B	exclusion	upstream	2.49982
RBM47_00279a	RBM47	exclusion	upstream	2.48699
LIN28A_00036	LIN28A	exclusion	upstream	2.24144
SRSF7_00073	SRSF7	exclusion	upstream	2.18315
TARDBP_00076	TARDBP	exclusion	upstream	2.17403
SRSF10_00089	SRSF10	exclusion	upstream	2.15418
RBM4_00113	RBM4	exclusion	upstream	2.08341
RBM46_00054	RBM46	exclusion	upstream	2.08163
PPRC1_00045	PPRC1	exclusion	upstream	2.03114
PCBP3_00215a	PCBP3	exclusion	exon	3.90269
HNRNPA1L2_00023	HNRNPA1	exclusion	exon	3.48812
HNRNPA1_00022	HNRNPA1L2	exclusion	exon	3.10889
SRSF10_00089	SRSF10	exclusion	exon	2.14764
RBM46_00054	RBM4	exclusion	exon	1.91902
HNRNPL_00027	HNRNPL	exclusion	downstream	28.1086
G3BP2_00021	G3BP1	exclusion	downstream	19.5236
PCBP3_00215a	PCBP3	exclusion	downstream	11.6273
TARDBP_00076	TARDBP	exclusion	downstream	7.80919
SFPQ_00177	SFPQ	exclusion	downstream	7.33257
QKI_00047	QKI	exclusion	downstream	7.18982
SNRNP70_00070	SNRNP70	exclusion	downstream	6.07472
CNOT4_00156	CNOT4	exclusion	downstream	5.91642
ZNF638_00164	ZNF638	exclusion	downstream	5.84793
MATR3_00037	MATR3	exclusion	downstream	4.80214
RBM4_00052	RBM4	exclusion	downstream	4.66487
ANKHD1_00002	ANKHD1	exclusion	downstream	4.45558
YBX1_00083	YBX1	exclusion	downstream	3.72975
SRSF10_00089	SRSF1	exclusion	downstream	3.37645
ENOX1_00149	ENOX1	exclusion	downstream	2.88086
HNRNPK_00026	HNRNPK	exclusion	downstream	2.83549
SRSF10_00089	SRSF10	exclusion	downstream	2.6492
RBM4_00113	RBM4	exclusion	downstream	2.47402
RBM45_00241	RBM45	exclusion	downstream	2.4184
FMR1_00016	FMR1	exclusion	downstream	2.36239
TRA2_00078a	TRA2B	exclusion	downstream	2.27621
PCBP2_00044	PCBP2	exclusion	downstream	2.10186

## Sheet: RBP_SE_Inclusion
PWM_id	RBP_name	Regulation	Location	Enrichment (z-scroe)
ZC3H10_00085	ZC3H10	inclusion	upstream	3.46968
HNRNPA1L2_00023	HNRNPA1L2	inclusion	upstream	2.93838
ZNF638_00164	ZNF638	inclusion	upstream	2.903
TARDBP_00076	TARDBP	inclusion	upstream	2.35273
HNRNPA1_00022	HNRNPA1	inclusion	upstream	2.29601
RBM5_00055	RBM5	inclusion	upstream	2.01095
HNRNPA1L2_00023	HNRNPA1L2	inclusion	exon	8.33194
BRUNOL5_00166	CELF5	inclusion	exon	7.51111
BRUNOL4_00004b	CELF3	inclusion	exon	7.15516
SRSF10_00019	SRSF10	inclusion	exon	6.16139
HNRNPA1_00022	HNRNPA1	inclusion	exon	6.04953
YBX1_00083	YBX1	inclusion	exon	5.32417
BRUNOL4_00004c	CELF4	inclusion	exon	5.29701
FUS_00018	FUS	inclusion	exon	4.81781
SRSF10_00090	SRSF10	inclusion	exon	4.56769
SRSF10_00088	SRSF10	inclusion	exon	4.238
BRUNOL4_00004	CELF1	inclusion	exon	4.12168
HNRNPA2B1_00024	HNRNPA2B1	inclusion	exon	3.92996
RBMS1_00152	RBMS1	inclusion	exon	3.80276
SRSF10_00089	SRSF10	inclusion	exon	3.49203
RBM4_00052	RBM4	inclusion	exon	3.27528
FMR1_00016	FMR1	inclusion	exon	3.16015
Rbm38_00283a	RBM38	inclusion	exon	2.97697
RBM8A_00056	RBM8A	inclusion	exon	2.97289
CPEB4_00158	CPEB4	inclusion	exon	2.86852
SRP54_00272a	SRP54	inclusion	exon	2.65831
SRSF9_00074	SRSF9	inclusion	exon	2.65366
CNOT4_00156	CNOT4	inclusion	exon	2.46537
ZC3H10_00085	ZC3H10	inclusion	exon	2.38226
BRUNOL4_00004a	CELF2	inclusion	exon	2.33893
PPRC1_00045	PPRC1	inclusion	exon	2.22747
HNRNPC_00025	HNRNPC	inclusion	exon	2.21875
MBNL1_00038b	MBNL3	inclusion	exon	2.21466
SRSF1_00109	SRSF1	inclusion	exon	2.18272
RBMS3_00173	RBMS3	inclusion	exon	2.1509
SRSF1_00107	SRSF1	inclusion	exon	2.14875
FXR2_00020	FXR2	inclusion	exon	2.14604
SRSF1_00108	SRSF1	inclusion	exon	2.12543
SRSF1_00106	SRSF1	inclusion	exon	2.01177
G3BP2_00021	G3BP1	inclusion	downstream	9.00548
BRUNOL4_00004a	CELF2	inclusion	downstream	8.7977
TARDBP_00076	TARDBP	inclusion	downstream	8.16454
BRUNOL6_00187	CELF6	inclusion	downstream	8.12975
BRUNOL4_00004	CELF1	inclusion	downstream	8.00741
SRSF7_00073	SRSF7	inclusion	downstream	7.9878
BRUNOL5_00166	CELF5	inclusion	downstream	5.79957
BRUNOL4_00004b	CELF3	inclusion	downstream	5.30601
BRUNOL4_00004c	CELF4	inclusion	downstream	5.06496
ENOX1_00149	ENOX1	inclusion	downstream	4.88793
HNRPLL_00178	HNRNPLL	inclusion	downstream	4.68836
RBM6_00170	RBM6	inclusion	downstream	4.37025
RBM45_00241	RBM45	inclusion	downstream	3.90569
RBM24_00184	RBM24	inclusion	downstream	3.49481
SFPQ_00177	SFPQ	inclusion	downstream	3.42074
SRSF10_00089	SRSF10	inclusion	downstream	3.17983
RBM28_00049	RBM28	inclusion	downstream	2.89236
RBM5_00055	RBM5	inclusion	downstream	2.87564
HNRNPA1L2_00023	HNRNPA1L2	inclusion	downstream	2.57648
RBMS1_00152	RBMS1	inclusion	downstream	2.20033
ZC3H10_00085	ZC3H10	inclusion	downstream	2.16152
SRP54_00272a	SRP54	inclusion	downstream	2.06565
Rbm38_00283a	RBM38	inclusion	downstream	2.00308
RBM5_00154	RBM5	inclusion	downstream	1.86022

## Sheet: RBP_APA_sites
PWM_id	RBP_name	Regulation	APA site	Location	Enrichment (z-scroe)
MBNL1_00038b	MBNL3	3'UTR shortening	proximal	upstream APA site	12.58
MBNL1_00038	MBNL1	3'UTR shortening	proximal	upstream APA site	12.41
MBNL1_00038a	MBNL2	3'UTR shortening	proximal	upstream APA site	11.26
HNRNPL_00091	HNRNPL	3'UTR shortening	proximal	upstream APA site	9.32
RBM47_00279a	RBM47	3'UTR shortening	proximal	upstream APA site	6.29
YBX1_00116	YBX1	3'UTR shortening	proximal	upstream APA site	5.91
G3BP2_00021	G3BP1	3'UTR shortening	proximal	upstream APA site	5.41
RBM3_00050	RBM3	3'UTR shortening	proximal	upstream APA site	5.11
SFPQ_00177	SFPQ	3'UTR shortening	proximal	upstream APA site	2.57
SRSF1_00163	SRSF1	3'UTR shortening	proximal	upstream APA site	2.44
RBM4_00113	RBM4	3'UTR shortening	proximal	upstream APA site	2.42
Rbm38_00283a	RBM38	3'UTR shortening	proximal	upstream APA site	2.34
SRSF1_00109	SRSF1	3'UTR shortening	proximal	upstream APA site	2.32
ZNF638_00164	ZNF638	3'UTR shortening	proximal	upstream APA site	2.04
RBM42_00151	RBM42	3'UTR shortening	proximal	upstream APA site	2.03
CNOT4_00156	CNOT4	3'UTR shortening	proximal	upstream APA site	1.92
SRSF7_00073	SRSF7	3'UTR shortening	proximal	upstream APA site	1.91
BRUNOL6_00187	CELF6	3'UTR shortening	proximal	upstream APA site	1.87
ANKHD1_00002	ANKHD1	3'UTR shortening	proximal	upstream APA site	1.86
SFPQ_00177	SFPQ	3'UTR shortening	proximal	downstream APA site	9.77
HNRNPA1L2_00023	HNRNPA1L2	3'UTR shortening	proximal	downstream APA site	4.01
ZNF638_00164	ZNF638	3'UTR shortening	proximal	downstream APA site	3.92
BRUNOL6_00187	CELF6	3'UTR shortening	proximal	downstream APA site	3.35
PCBP3_00215a	PCBP3	3'UTR shortening	proximal	downstream APA site	3.15
RBM5_00055	RBM5	3'UTR shortening	proximal	downstream APA site	3.06
SRP54_00272a	SRP54	3'UTR shortening	proximal	downstream APA site	2.93
LIN28A_00036	LIN28A	3'UTR shortening	proximal	downstream APA site	2.72
FXR2_00020	FXR2	3'UTR shortening	proximal	downstream APA site	2.59
HNRNPH2_00160	HNRNPH2	3'UTR shortening	proximal	downstream APA site	2.55
FMR1_00016	FMR1	3'UTR shortening	proximal	downstream APA site	2.5
LIN28A_00162	LIN28A	3'UTR shortening	proximal	downstream APA site	2.44
MBNL1_00038a	MBNL2	3'UTR shortening	proximal	downstream APA site	2.38
HNRNPA1_00022	HNRNPA1	3'UTR shortening	proximal	downstream APA site	2.28
Rbm38_00283a	RBM38	3'UTR shortening	proximal	downstream APA site	2.14
DAZAP1_00013	DAZAP1	3'UTR shortening	proximal	downstream APA site	1.87
ENOX1_00149	ENOX1	3'UTR shortening	proximal	downstream APA site	1.86
ZNF638_00164	ZNF638	3'UTR shortening	distal	upstream APA site	7.77735
SNRPA_00071	SNRPA	3'UTR shortening	distal	upstream APA site	6.8052
QKI_00047	QKI	3'UTR shortening	distal	upstream APA site	5.07277
TARDBP_00076	TARDBP	3'UTR shortening	distal	upstream APA site	4.12704
HNRNPL_00091	HNRNPL	3'UTR shortening	distal	upstream APA site	3.7907
YBX1_00083	YBX1	3'UTR shortening	distal	upstream APA site	2.66414
RBM24_00184	RBM24	3'UTR shortening	distal	upstream APA site	2.41285
ZCRB1_00087	ZCRB1	3'UTR shortening	distal	upstream APA site	2.32195
RBM4_00113	RBM4	3'UTR shortening	distal	upstream APA site	2.07883
ENOX1_00149	ENOX1	3'UTR shortening	distal	upstream APA site	2.01931
SRSF1_00108	SRSF1	3'UTR shortening	distal	upstream APA site	2.0078
BRUNOL6_00187	CELF6	3'UTR shortening	distal	upstream APA site	1.89709
MBNL1_00038a	MBNL2	3'UTR shortening	distal	downstream APA site	6.66433
MSI1_00176	MSI1	3'UTR shortening	distal	downstream APA site	5.98366
RBFOX1_00168	RBFOX1	3'UTR shortening	distal	downstream APA site	4.53653
BRUNOL6_00187	CELF6	3'UTR shortening	distal	downstream APA site	4.22253
RBFOX1_00168b	RBFOX3	3'UTR shortening	distal	downstream APA site	4.12339
SNRNP70_00070	SNRNP70	3'UTR shortening	distal	downstream APA site	4.03467
BRUNOL4_00004c	CELF4	3'UTR shortening	distal	downstream APA site	3.98213
MBNL1_00038b	MBNL3	3'UTR shortening	distal	downstream APA site	2.96307
RBFOX1_00168a	RBFOX2	3'UTR shortening	distal	downstream APA site	2.8959
SAMD4A_00063	SAMD4A	3'UTR shortening	distal	downstream APA site	2.61485
DAZAP1_00013	DAZAP1	3'UTR shortening	distal	downstream APA site	2.59016
FUS_00018	FUS	3'UTR shortening	distal	downstream APA site	2.45691
RBM4_00052	RBM4	3'UTR shortening	distal	downstream APA site	2.45222
RBM3_00050	RBM3	3'UTR shortening	distal	downstream APA site	2.38957
ESRP2_00150	ESRP1	3'UTR shortening	distal	downstream APA site	2.35713
ENOX1_00149	ENOX1	3'UTR shortening	distal	downstream APA site	2.30465
PPRC1_00045	PPRC1	3'UTR shortening	distal	downstream APA site	2.10068
RBM8A_00056	RBM8A	3'UTR shortening	distal	downstream APA site	2.08715
BRUNOL4_00004	CELF1	3'UTR shortening	distal	downstream APA site	1.90612
SRSF10_00090	SRSF10	3'UTR lengthening	distal	downstream APA site	9.31686
MSI1_00041	MSI1	3'UTR lengthening	distal	downstream APA site	6.56075
HNRNPA1L2_00023	HNRNPA1L2	3'UTR lengthening	distal	downstream APA site	3.9772
MSI1_00176	MSI1	3'UTR lengthening	distal	downstream APA site	3.92147
HNRNPA1_00022	HNRNPA1	3'UTR lengthening	distal	downstream APA site	3.5072
SNRNP70_00070	SNRNP70	3'UTR lengthening	distal	downstream APA site	2.9298
SRSF10_00089	SRSF10	3'UTR lengthening	distal	downstream APA site	2.56552
SRSF1_00163	SRSF1	3'UTR lengthening	distal	downstream APA site	2.37764
PTBP1_00269	PTBP3	3'UTR lengthening	distal	downstream APA site	2.29789
ENOX1_00149	ENOX1	3'UTR lengthening	distal	downstream APA site	2.265
SRP54_00272a	SRP54	3'UTR lengthening	distal	downstream APA site	2.09693
BRUNOL6_00187	CELF6	3'UTR lengthening	distal	downstream APA site	2.06791
SRSF1_00108	SRSF1	3'UTR lengthening	distal	downstream APA site	2.02263
HNRNPH2_00160	HNRNPH2	3'UTR lengthening	distal	downstream APA site	1.91046
FXR1_00161	FXR1	3'UTR lengthening	distal	upstream APA site	7.15365
RBFOX1_00168b	RBFOX3	3'UTR lengthening	distal	upstream APA site	6.27655
RBFOX1_00168a	RBFOX2	3'UTR lengthening	distal	upstream APA site	5.06825
RBFOX1_00168	RBFOX1	3'UTR lengthening	distal	upstream APA site	4.22629
SRSF2_00072	SRSF2	3'UTR lengthening	distal	upstream APA site	2.90194
FUS_00018	FUS	3'UTR lengthening	distal	upstream APA site	2.3385
ZC3H10_00085	ZC3H10	3'UTR lengthening	distal	upstream APA site	2.11118
SRSF7_00073	SRSF7	3'UTR lengthening	distal	upstream APA site	1.94737
SRSF7_00073	SRSF7	3'UTR lengthening	proximal	upstream APA site	14.5124
RBM3_00050	RBM3	3'UTR lengthening	proximal	upstream APA site	9.84634
MSI1_00176	MSI1	3'UTR lengthening	proximal	upstream APA site	7.36106
TRA2_00078a	TRA2B	3'UTR lengthening	proximal	upstream APA site	6.95479
SNRPA_00071	SNRPA	3'UTR lengthening	proximal	upstream APA site	6.88816
SNRNP70_00070	SNRNP70	3'UTR lengthening	proximal	upstream APA site	5.29544
BRUNOL4_00004	CELF1	3'UTR lengthening	proximal	upstream APA site	4.71844
RBFOX1_00168	RBFOX1	3'UTR lengthening	proximal	upstream APA site	4.50745
RBFOX1_00168b	RBFOX3	3'UTR lengthening	proximal	upstream APA site	3.57607
BRUNOL4_00004a	CELF2	3'UTR lengthening	proximal	upstream APA site	3.55252
RBFOX1_00168a	RBFOX2	3'UTR lengthening	proximal	upstream APA site	3.31196
BRUNOL4_00004b	CELF3	3'UTR lengthening	proximal	upstream APA site	3.15701
BRUNOL4_00004c	CELF4	3'UTR lengthening	proximal	upstream APA site	3.04144
BRUNOL5_00166	CELF5	3'UTR lengthening	proximal	upstream APA site	2.96292
RBM4_00113	RBM4	3'UTR lengthening	proximal	upstream APA site	2.90245
ENOX1_00149	ENOX1	3'UTR lengthening	proximal	upstream APA site	2.699
FMR1_00016	FMR1	3'UTR lengthening	proximal	upstream APA site	2.48663
BRUNOL6_00187	CELF6	3'UTR lengthening	proximal	upstream APA site	2.20761
FXR1_00161	FXR1	3'UTR lengthening	proximal	upstream APA site	2.09953
PCBP2_00044	PCBP2	3'UTR lengthening	proximal	upstream APA site	2.09259
PPRC1_00045	PPRC1	3'UTR lengthening	proximal	upstream APA site	2.064
PABPC3_00153	PABPC3	3'UTR lengthening	proximal	upstream APA site	1.95568
FUS_00018	FUS	3'UTR lengthening	proximal	upstream APA site	1.9214
