# Supplementary material
Source: Preprints.org preprint supplement (doi:10.20944/preprints202004.0323.v1)
Supplement: Supplementary file 1 [file supplementary › Supplementary_Table_12_Whippet_genes_with_Tandem_APA_sites.xlsx]

## Sheet: 3UTR_shortened_genes
Gene	Symbol	Node	chr	start	end	Strand	Type	PSI(LNA-DSCAM-AS1)	PSI(LNA-CTRL)	DeltaPsi(PSI(LNA-DSCAM-AS1) - PSI(LNA-CTRL))	Probability	Complexity	Entropy	3'UTR effect	APA site
ENSG00000131269.15	ABCB7	28	chrX	75053282	75053283	-	APA	0.03202	0.37595	-0.34393	1	K3	1.2193	shortening	distal
ENSG00000178096.8	BOLA1	5	chr1	149900793	149900798	+	APA	0.002285	0.18099	-0.1787	1	K1	0.7483	shortening	distal
ENSG00000178096.8	BOLA1	4	chr1	149900123	149900792	+	APA	0.99767	0.81812	0.17955	1	K1	0.7483	shortening	proximal
ENSG00000160058.18	BSDC1	25	chr1	32366296	32366300	-	APA	0.42995	0.30162	0.12833	1	K3	1.5643	shortening	proximal
ENSG00000131943.17	C19orf12	14	chr19	29701689	29702340	-	APA	0.1474	0.0027105	0.14469	1	K3	1.3603	shortening	proximal
ENSG00000182985.17	CADM1	22	chr11	115176327	115176407	-	APA	0.5812	0.0021358	0.57907	1	K3	1.6751	shortening	proximal
ENSG00000182985.17	CADM1	23	chr11	115176295	115176326	-	APA	0.011784	0.50426	-0.49248	1	K3	1.6751	shortening	distal
ENSG00000106144.19	CASP2	23	chr7	143305823	143306569	+	APA	0.001383	0.099173	-0.09779	1	K3	2.1102	shortening	distal
ENSG00000108691.9	CCL2	9	chr17	34256817	34257203	+	APA	0.41691	0.944	-0.5271	1	K1	0.9996	shortening	distal
ENSG00000108691.9	CCL2	8	chr17	34256722	34256816	+	APA	0.58541	0.057736	0.52767	1	K1	0.9996	shortening	proximal
ENSG00000123080.10	CDKN2C	7	chr1	50974559	50974633	+	APA	0.58371	0.9693	-0.38559	1	K1	0.9934	shortening	distal
ENSG00000123080.10	CDKN2C	6	chr1	50973893	50974558	+	APA	0.41401	0.030498	0.38351	1	K1	0.9934	shortening	proximal
ENSG00000198707.14	CEP290	58	chr12	88049020	88049414	-	APA	0.94638	0.04819	0.89819	1	K1	0	shortening	proximal
ENSG00000198707.14	CEP290	59	chr12	88049016	88049019	-	APA	0.053414	0.94986	-0.89645	1	K1	0	shortening	distal
ENSG00000183137.14	CEP57L1	22	chr6	109163911	109163932	+	APA	0.017027	0.4205	-0.40347	1	K2	1.5107	shortening	distal
ENSG00000183137.14	CEP57L1	21	chr6	109163164	109163910	+	APA	0.68215	0.13252	0.54964	1	K2	1.5107	shortening	proximal
ENSG00000051523.10	CYBA	17	chr16	88643283	88643513	-	APA	0.7815	0.99892	-0.21742	1	K1	0.9383	shortening	distal
ENSG00000051523.10	CYBA	16	chr16	88643514	88643571	-	APA	0.21865	0.0010786	0.21758	1	K1	0.9383	shortening	proximal
ENSG00000070413.19	DGCR2	15	chr22	19036286	19039121	-	APA	0.89484	0.53888	0.35596	1	K1	1	shortening	proximal
ENSG00000070413.19	DGCR2	16	chr22	19036282	19036285	-	APA	0.10547	0.4612	-0.35573	1	K1	1	shortening	distal
ENSG00000067248.9	DHX29	29	chr5	55256249	55256540	-	APA	0.98514	0.17427	0.81087	1	K1	0.7481	shortening	proximal
ENSG00000067248.9	DHX29	30	chr5	55256245	55256248	-	APA	0.01501	0.82471	-0.8097	1	K1	0.7481	shortening	distal
ENSG00000160305.17	DIP2A	56	chr21	46567370	46569708	+	APA	0.96456	0.83311	0.13145	1	K1	0.7169	shortening	proximal
ENSG00000108963.17	DPH1	30	chr17	2043025	2043424	+	APA	0.5273	0.75216	-0.22486	1	K3	1.6954	shortening	distal
ENSG00000281649.1	EBLN3P	7	chr9	37086668	37086874	+	APA	0.14041	0.00062741	0.13978	1	K2	1.7432	shortening	proximal
ENSG00000138798.11	EGF	30	chr4	110011995	110012266	+	APA	0.38332	0.92982	-0.5465	1	K2	1.5668	shortening	distal
ENSG00000187266.13	EPOR	19	chr19	11377874	11378255	-	APA	0.60478	0.034052	0.57073	1	K3	1.3799	shortening	proximal
ENSG00000187266.13	EPOR	20	chr19	11377866	11377873	-	APA	0.015423	0.61621	-0.60079	1	K3	1.3799	shortening	distal
ENSG00000134864.10	GGACT	6	chr13	100532514	100532601	-	APA	0.019164	0.39128	-0.37212	1	K2	1.4627	shortening	distal
ENSG00000152904.11	GGPS1	8	chr1	235342011	235342596	+	APA	0.18988	0.017064	0.17282	1	K3	1.7665	shortening	proximal
ENSG00000115159.15	GPD2	29	chr2	156583274	156583404	+	APA	0.053985	0.18298	-0.12899	1	K3	1.2605	shortening	distal
ENSG00000095066.11	HOOK2	11	chr19	12774535	12774668	-	APA	0.17819	0.010487	0.1677	1	K2	1.8729	shortening	proximal
ENSG00000182149.20	IST1	36	chr16	71928340	71929008	+	APA	0.47741	0.37318	0.10422	1	K3	1.9877	shortening	proximal
ENSG00000117009.11	KMO	19	chr1	241592289	241595642	+	APA	0.43564	0.98997	-0.55433	1	K1	0.9984	shortening	distal
ENSG00000117009.11	KMO	18	chr1	241591953	241592288	+	APA	0.56312	0.010078	0.55304	1	K1	0.9984	shortening	proximal
ENSG00000106003.12	LFNG	14	chr7	2528428	2528429	+	APA	0.078516	0.7876	-0.70908	1	K1	0.7658	shortening	distal
ENSG00000106003.12	LFNG	13	chr7	2527146	2528427	+	APA	0.92136	0.21235	0.709	1	K1	0.7658	shortening	proximal
ENSG00000143409.15	MINDY1	20	chr1	150997100	150997107	-	APA	0.19005	0.0045301	0.18552	1	K2	0.7835	shortening	proximal
ENSG00000170873.18	MTSS1	34	chr8	124550976	124552799	-	APA	0.037106	0.27601	-0.23891	1	K3	1.7372	shortening	medium
ENSG00000085719.12	CPNE3	21	chr8	86561412	86561498	+	APA	0.25718	0.353	-0.095816	1	K1	0.9384	shortening	distal
ENSG00000085719.12	CPNE3	20	chr8	86558288	86561411	+	APA	0.74296	0.64715	0.095806	1	K1	0.9384	shortening	proximal
ENSG00000142794.18	NBPF3	27	chr1	21483413	21483467	+	APA	0.21624	0.014359	0.20188	1	K2	0.8374	shortening	proximal
ENSG00000126883.16	NUP214	53	chr9	131233702	131233703	+	APA	0.0064952	0.59817	-0.59168	1	K2	1.0094	shortening	distal
ENSG00000126883.16	NUP214	52	chr9	131233454	131233701	+	APA	0.62075	0.008611	0.61214	1	K2	1.0094	shortening	proximal
ENSG00000203880.11	PCMTD2	11	chr20	64275654	64276230	+	APA	0.34179	0.45502	-0.11322	1	K2	0.9991	shortening	distal
ENSG00000203880.11	PCMTD2	10	chr20	64274843	64275653	+	APA	0.65794	0.54523	0.11272	1	K2	0.9991	shortening	proximal
ENSG00000164088.17	PPM1M	21	chr3	52249791	52250595	+	APA	0.22657	0.94028	-0.71371	1	K2	1.0414	shortening	distal
ENSG00000164088.17	PPM1M	20	chr3	52249670	52249790	+	APA	0.5792	0.034194	0.54501	1	K2	1.0414	shortening	proximal
ENSG00000185532.15	PRKG1	22	chr10	52294177	52298350	+	APA	0.72134	0.98355	-0.26221	1	K1	0.9193	shortening	distal
ENSG00000185532.15	PRKG1	21	chr10	52293802	52294176	+	APA	0.2813	0.016383	0.26492	1	K1	0.9193	shortening	proximal
ENSG00000158079.14	PTPDC1	16	chr9	94109853	94109854	+	APA	0.18004	0.03137	0.14867	1	K2	1.3424	shortening	distal
ENSG00000158079.14	PTPDC1	14	chr9	94107828	94107912	+	APA	0.050557	0.84493	-0.79438	1	K2	1.3424	shortening	distal
ENSG00000158079.14	PTPDC1	15	chr9	94107913	94109852	+	APA	0.7451	0.12721	0.61789	1	K2	1.3424	shortening	proximal
ENSG00000168297.15	PXK	30	chr3	58425152	58426019	+	APA	0.65663	0.95126	-0.29463	1	K3	1.3247	shortening	distal
ENSG00000112183.14	RBM24	10	chr6	17292764	17293023	+	APA	0.0054821	0.15075	-0.14526	1	K3	1.5737	shortening	proximal
ENSG00000170889.13	RPS9	21	chr19	54207523	54207630	+	APA	0.21487	0.31533	-0.10046	1	K2	1.7584	shortening	distal
ENSG00000059588.9	TARBP1	38	chr1	234391378	234391597	-	APA	0.98559	0.74762	0.23797	1	K2	1.1439	shortening	proximal
ENSG00000179152.19	TCAIM	23	chr3	44407442	44407790	+	APA	0.19849	0.012321	0.18617	1	K2	1.3382	shortening	proximal
ENSG00000172171.10	TEFM	8	chr17	30898986	30899606	-	APA	0.97499	0.021949	0.95304	1	K1	0.0036	shortening	proximal
ENSG00000172171.10	TEFM	9	chr17	30898983	30898985	-	APA	0.024799	0.97778	-0.95298	1	K1	0.0036	shortening	distal
ENSG00000140332.15	TLE3	47	chr15	70049799	70049800	-	APA	0.021398	0.24546	-0.22406	1	K3	2.5292	shortening	distal
ENSG00000170537.12	TMC7	23	chr16	19063182	19063942	+	APA	0.061375	0.54532	-0.48394	1	K1	0.9998	shortening	distal
ENSG00000170537.12	TMC7	22	chr16	19061778	19063181	+	APA	0.93949	0.45705	0.48245	1	K1	0.9998	shortening	proximal
ENSG00000166575.16	TMEM135	24	chr11	87321360	87322350	+	APA	0.18206	0.39237	-0.21031	1	K2	1.5596	shortening	medium
ENSG00000166575.16	TMEM135	25	chr11	87322351	87323758	+	APA	0.39394	0.57002	-0.17608	1	K2	1.5596	shortening	distal
ENSG00000166575.16	TMEM135	23	chr11	87321201	87321359	+	APA	0.42665	0.039341	0.38731	1	K2	1.5596	shortening	proximal
ENSG00000119777.18	TMEM214	35	chr2	27041688	27041693	+	APA	0.0041974	0.21643	-0.21223	1	K2	0.8854	shortening	distal
ENSG00000119777.18	TMEM214	34	chr2	27041244	27041687	+	APA	0.99576	0.77953	0.21623	1	K2	0.8854	shortening	proximal
ENSG00000213689.11	TREX1	13	chr3	48467601	48467643	+	APA	0.57836	0.021078	0.55728	1	K2	1.0859	shortening	proximal
ENSG00000213689.11	TREX1	14	chr3	48467644	48467645	+	APA	0.021966	0.78662	-0.76465	1	K2	1.0859	shortening	distal
ENSG00000253352.8	TUG1	18	chr22	30975480	30976063	+	APA	0.11461	0.0024333	0.11218	1	K2	1.2099	shortening	proximal
ENSG00000253352.8	TUG1	19	chr22	30976064	30976081	+	APA	0.047005	0.16083	-0.11382	1	K2	1.2099	shortening	distal
ENSG00000140455.16	USP3	28	chr15	63591054	63591444	+	APA	0.18957	0.015104	0.17446	1	K3	2.1683	shortening	proximal
ENSG00000033030.13	ZCCHC8	24	chr12	122472893	122472898	-	APA	0.0033691	0.48257	-0.4792	1	K3	1.6449	shortening	distal
ENSG00000171574.17	ZNF584	18	chr19	58418311	58418323	+	APA	0.0042228	0.43131	-0.42709	1	K2	1.5912	shortening	distal
ENSG00000105750.14	ZNF85	15	chr19	20948744	20949364	+	APA	0.11878	0.008035	0.11075	1	K2	1.3344	shortening	distal
ENSG00000228300.13	C19orf24	7	chr19	1279245	1279249	+	APA	0.0038319	0.1845	-0.18067	0.999	K1	0.879	shortening	distal
ENSG00000064703.11	DDX20	21	chr1	111765831	111767574	+	APA	0.59246	0.86293	-0.27047	0.999	K2	1.1215	shortening	distal
ENSG00000064703.11	DDX20	20	chr1	111765737	111765830	+	APA	0.38086	0.076853	0.30401	0.999	K2	1.1215	shortening	proximal
ENSG00000160305.17	DIP2A	57	chr21	46569709	46569852	+	APA	0.035674	0.16706	-0.13138	0.999	K1	0.7169	shortening	distal
ENSG00000269335.5	IKBKG	19	chrX	154564319	154565033	+	APA	0.62431	0.14805	0.47626	0.999	K1	0.9759	shortening	proximal
ENSG00000269335.5	IKBKG	20	chrX	154565034	154565046	+	APA	0.37582	0.85167	-0.47585	0.999	K1	0.9759	shortening	distal
ENSG00000175591.11	P2RY2	8	chr11	73235935	73236352	+	APA	0.3859	0.49103	-0.10513	0.999	K2	1.5353	shortening	distal
ENSG00000105136.20	ZNF419	17	chr19	57494221	57494253	+	APA	0.013329	0.12215	-0.10883	0.999	K3	0.9042	shortening	distal
ENSG00000185658.13	BRWD1	63	chr21	39187246	39187417	-	APA	0.17255	0.0035217	0.16903	0.998	K1	0.8813	shortening	proximal
ENSG00000185658.13	BRWD1	64	chr21	39184176	39187245	-	APA	0.82772	0.99638	-0.16865	0.998	K1	0.8813	shortening	distal
ENSG00000161513.11	FDXR	36	chr17	74862542	74862543	-	APA	0.010618	0.11777	-0.10715	0.998	K3	0.6198	shortening	distal
ENSG00000172766.18	NAA16	29	chr13	41375813	41377030	+	APA	0.85772	0.98853	-0.13082	0.998	K1	0.7582	shortening	distal
ENSG00000115216.13	NRBP1	23	chr2	27442256	27442259	+	APA	0.0016131	0.12155	-0.11993	0.998	K1	0.7713	shortening	distal
ENSG00000013306.15	SLC25A39	26	chr17	44319627	44319635	-	APA	0.17906	0.28395	-0.10489	0.998	K2	0.9069	shortening	distal
ENSG00000114520.10	SNX4	16	chr3	125446644	125447710	-	APA	0.37332	0.51526	-0.14194	0.998	K1	1	shortening	distal
ENSG00000103168.16	TAF1C	36	chr16	84178749	84178780	-	APA	0.0011258	0.16513	-0.164	0.998	K3	2.0843	shortening	distal
ENSG00000140332.15	TLE3	45	chr15	70049802	70050096	-	APA	0.16069	0.0026318	0.15806	0.998	K3	2.5292	shortening	proximal
ENSG00000163900.10	TMEM41A	9	chr3	185490997	185491757	-	APA	0.11617	0.0022487	0.11393	0.998	K1	0.7347	shortening	proximal
ENSG00000197647.11	ZNF433	9	chr19	12016548	12016666	-	APA	0.38555	0.050059	0.33549	0.998	K2	1.8795	shortening	proximal
ENSG00000171466.9	ZNF562	11	chr19	9653758	9653878	-	APA	0.0019377	0.28504	-0.28311	0.998	K3	1.8575	shortening	distal
ENSG00000148057.15	IDNK	11	chr9	83643905	83644130	+	APA	0.62414	0.85506	-0.23092	0.997	K2	1.3502	shortening	distal
ENSG00000197530.12	MIB2	16	chr1	1617078	1617323	+	APA	0.01744	0.3164	-0.29896	0.997	K2	1.5399	shortening	distal
ENSG00000108852.14	MPP2	27	chr17	43877332	43877376	-	APA	0.019261	0.15862	-0.13936	0.997	K3	1.6041	shortening	distal
ENSG00000075856.11	SART3	34	chr12	108522580	108522707	-	APA	0.36865	0.56933	-0.20068	0.997	K2	1.5834	shortening	distal
ENSG00000013306.15	SLC25A39	25	chr17	44319636	44319869	-	APA	0.82085	0.71569	0.10517	0.997	K2	0.9069	shortening	proximal
ENSG00000114520.10	SNX4	15	chr3	125447711	125447826	-	APA	0.6263	0.48436	0.14193	0.997	K1	1	shortening	proximal
ENSG00000134602.15	STK26	19	chrX	132074462	132075943	+	APA	0.86518	0.97826	-0.11308	0.997	K2	0.9052	shortening	distal
ENSG00000163900.10	TMEM41A	10	chr3	185489601	185490996	-	APA	0.88343	0.99768	-0.11425	0.997	K1	0.7347	shortening	distal
ENSG00000168813.16	ZNF507	13	chr19	32382717	32383248	+	APA	0.0025724	0.32164	-0.31907	0.997	K2	1.5703	shortening	distal
ENSG00000119778.14	ATAD2B	33	chr2	23751803	23752087	-	APA	0.12944	0.0021221	0.12732	0.996	K1	0.8135	shortening	proximal
ENSG00000165813.18	CCDC186	20	chr10	114124929	114125226	-	APA	0.54207	0.41934	0.12273	0.996	K1	0.9986	shortening	proximal
ENSG00000128973.12	CLN6	34	chr15	68206992	68207029	-	APA	0.7743	0.89564	-0.12134	0.996	K3	1.1627	shortening	distal
ENSG00000166200.14	COPS2	19	chr15	49127536	49128094	-	APA	0.20818	0.099137	0.10904	0.996	K2	1.1304	shortening	proximal
ENSG00000166200.14	COPS2	20	chr15	49127350	49127535	-	APA	0.73325	0.83798	-0.10473	0.996	K2	1.1304	shortening	distal
ENSG00000175550.7	DRAP1	13	chr11	65921451	65921525	+	APA	0.24951	0.080481	0.16903	0.996	K3	1.8523	shortening	proximal
ENSG00000196497.16	IPO4	49	chr14	24180226	24180304	-	APA	0.30399	0.19903	0.10496	0.996	K3	1.7677	shortening	proximal
ENSG00000130702.15	LAMA5	100	chr20	62309059	62309064	-	APA	0.57491	0.82178	-0.24687	0.996	K2	1.0006	shortening	distal
ENSG00000115216.13	NRBP1	22	chr2	27441708	27442255	+	APA	0.99837	0.87828	0.12009	0.996	K1	0.7713	shortening	proximal
ENSG00000004399.12	PLXND1	50	chr3	129555214	129555217	-	APA	0.0059769	0.17018	-0.1642	0.996	K2	0.8252	shortening	distal
ENSG00000213889.10	PPM1N	10	chr19	45502311	45502342	+	APA	0.062445	0.48189	-0.41944	0.996	K2	1.5315	shortening	distal
ENSG00000163558.12	PRKCI	24	chr3	170303040	170303165	+	APA	0.63558	0.5065	0.12908	0.996	K2	1.2718	shortening	proximal
ENSG00000134533.6	RERG	12	chr12	15107783	15107789	-	APA	0.003174	0.22856	-0.22539	0.996	K2	1.5488	shortening	distal
ENSG00000234684.6	SDCBP2-AS1	5	chr20	1376798	1378183	+	APA	0.35524	0.040091	0.31515	0.996	K1	0.9931	shortening	proximal
ENSG00000234684.6	SDCBP2-AS1	6	chr20	1378184	1378734	+	APA	0.64695	0.96134	-0.31439	0.996	K1	0.9931	shortening	distal
ENSG00000141258.12	SGSM2	31	chr17	2374282	2374580	+	APA	0.58588	0.84936	-0.26348	0.996	K1	0.9946	shortening	distal
ENSG00000159199.13	ATP5G1	14	chr17	48895655	48895868	+	APA	0.99539	0.75784	0.23754	0.995	K2	1.3258	shortening	proximal
ENSG00000197223.11	C1D	9	chr2	68042656	68042713	-	APA	0.24292	0.39773	-0.1548	0.995	K2	1.3251	shortening	distal
ENSG00000165813.18	CCDC186	21	chr10	114120862	114124928	-	APA	0.45643	0.5805	-0.12407	0.995	K1	0.9986	shortening	distal
ENSG00000163362.10	INAVA	12	chr1	200913729	200915735	+	APA	0.7334	0.99488	-0.26148	0.995	K1	0.9872	shortening	distal
ENSG00000180834.7	MAP6D1	5	chr3	183817062	183817385	-	APA	0.22135	0.030308	0.19105	0.995	K1	0.8168	shortening	proximal
ENSG00000180834.7	MAP6D1	6	chr3	183815876	183817061	-	APA	0.77893	0.97005	-0.19112	0.995	K1	0.8168	shortening	distal
ENSG00000059588.9	TARBP1	39	chr1	234391339	234391377	-	APA	0.014589	0.14427	-0.12968	0.995	K2	1.1439	shortening	distal
ENSG00000143514.16	TP53BP2	27	chr1	223780789	223780894	-	APA	0.0065117	0.11976	-0.11325	0.995	K2	1.4748	shortening	distal
ENSG00000138798.11	EGF	29	chr4	110011690	110011994	+	APA	0.40248	0.070242	0.33224	0.994	K2	1.5668	shortening	proximal
ENSG00000147689.16	FAM83A	10	chr8	123209525	123209762	+	APA	0.037414	0.15789	-0.12048	0.994	K2	1.1717	shortening	distal
ENSG00000123739.10	PLA2G12A	7	chr4	109714262	109714495	-	APA	0.24769	0.14872	0.098966	0.994	K2	1.4749	shortening	proximal
ENSG00000067606.16	PRKCZ	32	chr1	2185117	2185190	+	APA	0.25115	0.45181	-0.20066	0.994	K3	1.0914	shortening	distal
ENSG00000101417.11	PXMP4	7	chr20	33707489	33707969	-	APA	0.49574	0.3769	0.11884	0.994	K2	1.5354	shortening	proximal
ENSG00000205060.10	SLC35B4	15	chr7	134294606	134294961	-	APA	0.0021427	0.12497	-0.12283	0.994	K2	1.5225	shortening	distal
ENSG00000153914.15	SREK1	36	chr5	66180812	66180879	+	APA	0.19006	0.34447	-0.15441	0.994	K3	1.4489	shortening	distal
ENSG00000159199.13	ATP5G1	15	chr17	48895869	48895869	+	APA	0.0046246	0.13161	-0.12699	0.993	K2	1.3258	shortening	medium
ENSG00000105173.13	CCNE1	16	chr19	29824213	29824280	+	APA	0.88303	0.17143	0.7116	0.993	K2	1.5514	shortening	proximal
ENSG00000089486.16	CDIP1	16	chr16	4510739	4511323	-	APA	0.49156	0.02346	0.4681	0.993	K3	1.5683	shortening	proximal
ENSG00000198265.11	HELZ	39	chr17	67077929	67077971	-	APA	0.00077391	0.16344	-0.16266	0.993	K2	1.4077	shortening	medium
ENSG00000130702.15	LAMA5	98	chr20	62309145	62309475	-	APA	0.42482	0.17808	0.24674	0.993	K2	1.0006	shortening	proximal
ENSG00000050426.15	LETMD1	42	chr12	51060419	51060421	+	APA	0.0066019	0.21307	-0.20647	0.993	K4	2.2862	shortening	distal
ENSG00000143409.15	MINDY1	21	chr1	150996835	150997099	-	APA	0.81067	0.97488	-0.16421	0.993	K2	0.7835	shortening	distal
ENSG00000125445.10	MRPS7	15	chr17	75266364	75266373	+	APA	0.035673	0.26132	-0.22565	0.993	K2	1.5487	shortening	distal
ENSG00000089818.17	NECAP1	17	chr12	8096042	8097730	+	APA	0.15506	0.0015697	0.15349	0.993	K2	0.9247	shortening	proximal
ENSG00000004399.12	PLXND1	49	chr3	129555218	129556428	-	APA	0.99384	0.82966	0.16419	0.993	K2	0.8252	shortening	proximal
ENSG00000155846.16	PPARGC1B	20	chr5	149847563	149847627	+	APA	0.25796	0.003362	0.2546	0.993	K3	2.1006	shortening	proximal
ENSG00000185627.17	PSMD13	27	chr11	252618	252956	+	APA	0.048685	0.25135	-0.20266	0.993	K2	1.5842	shortening	distal
ENSG00000141258.12	SGSM2	30	chr17	2373514	2374281	+	APA	0.41339	0.15204	0.26135	0.993	K1	0.9946	shortening	proximal
ENSG00000204271.12	SPIN3	10	chrX	56990895	56990941	-	APA	0.026839	0.18198	-0.15514	0.993	K2	1.5543	shortening	distal
ENSG00000259431.5	THTPA	10	chr14	23558695	23558909	+	APA	0.028891	0.1571	-0.12821	0.993	K3	2.1029	shortening	distal
ENSG00000033030.13	ZCCHC8	23	chr12	122472899	122473939	-	APA	0.81068	0.35333	0.45735	0.993	K3	1.6449	shortening	proximal
ENSG00000273611.4	ZNHIT3	14	chr17	36495820	36495822	+	APA	0.003642	0.45728	-0.45364	0.993	K2	1.021	shortening	distal
ENSG00000177646.18	ACAD9	31	chr3	128913101	128913104	+	APA	0.0034277	0.22441	-0.22098	0.992	K3	2.242	shortening	distal
ENSG00000119778.14	ATAD2B	34	chr2	23748671	23751802	-	APA	0.87027	0.99783	-0.12756	0.992	K1	0.8135	shortening	distal
ENSG00000228300.13	C19orf24	6	chr19	1278777	1279244	+	APA	0.99623	0.81601	0.18022	0.992	K1	0.879	shortening	proximal
ENSG00000122085.16	MTERF4	27	chr2	241087225	241089040	-	APA	0.24651	0.48587	-0.23937	0.992	K3	1.837	shortening	distal
ENSG00000172766.18	NAA16	28	chr13	41375405	41375812	+	APA	0.14142	0.01126	0.13016	0.992	K1	0.7582	shortening	proximal
ENSG00000196172.9	ZNF681	7	chr19	23744964	23745323	-	APA	0.0060004	0.30831	-0.30231	0.992	K2	1.5717	shortening	distal
ENSG00000163362.10	INAVA	11	chr1	200913537	200913728	+	APA	0.26564	0.0051846	0.26046	0.991	K1	0.9872	shortening	proximal
ENSG00000170873.18	MTSS1	35	chr8	124550790	124550975	-	APA	0.62786	0.46786	0.16001	0.991	K3	1.7372	shortening	distal
ENSG00000175470.18	PPP2R2D	18	chr10	131956243	131956555	+	APA	0.63458	0.79945	-0.16487	0.991	K2	1.1193	shortening	distal
ENSG00000158286.12	RNF207	6	chr1	6207565	6208307	+	APA	0.46282	0.84905	-0.38622	0.991	K1	0.998	shortening	distal
ENSG00000113240.12	CLK4	46	chr5	178602664	178603167	-	APA	0.21631	0.42391	-0.20761	0.99	K3	1.4451	shortening	distal
ENSG00000124743.5	KLHL31	5	chr6	53647901	53651597	-	APA	0.6674	0.96118	-0.29378	0.99	K1	0.9968	shortening	distal
ENSG00000248360.7	LINC00504	13	chr4	14470465	14474084	-	APA	0.30409	0.62231	-0.31822	0.99	K1	0.9942	shortening	distal
ENSG00000144182.16	LIPT1	6	chr2	99162076	99162363	+	APA	0.016324	0.20951	-0.19318	0.99	K2	1.0173	shortening	distal
ENSG00000078070.12	MCCC1	30	chr3	183015220	183015288	-	APA	0.44026	0.78224	-0.34198	0.99	K2	0.9994	shortening	distal
ENSG00000120756.12	PLS1	21	chr3	142712056	142713659	+	APA	0.68852	0.87051	-0.18199	0.99	K2	0.9996	shortening	distal
ENSG00000105173.13	CCNE1	15	chr19	29823655	29824212	+	APA	0.020941	0.29519	-0.27425	0.989	K2	1.5514	shortening	proximal
ENSG00000113240.12	CLK4	43	chr5	178603272	178603588	-	APA	0.1813	0.010255	0.17104	0.989	K3	1.4451	shortening	proximal
ENSG00000172409.5	CLP1	8	chr11	57661437	57661864	+	APA	0.86887	0.99074	-0.12187	0.989	K2	0.7384	shortening	distal
ENSG00000148057.15	IDNK	10	chr9	83643871	83643904	+	APA	0.33181	0.14609	0.18572	0.989	K2	1.3502	shortening	proximal
ENSG00000120756.12	PLS1	20	chr3	142711872	142712055	+	APA	0.30239	0.11827	0.18412	0.989	K2	0.9996	shortening	proximal
ENSG00000175470.18	PPP2R2D	17	chr10	131955684	131956242	+	APA	0.34707	0.18455	0.16252	0.989	K2	1.1193	shortening	proximal
ENSG00000134882.15	UBAC2	22	chr13	99386428	99386434	+	APA	0.0018161	0.13676	-0.13495	0.989	K3	1.837	shortening	distal
ENSG00000213020.9	ZNF611	19	chr19	52702813	52703609	-	APA	0.48182	0.6431	-0.16129	0.989	K2	1.587	shortening	distal
ENSG00000273611.4	ZNHIT3	13	chr17	36495223	36495819	+	APA	0.99622	0.51637	0.47985	0.989	K2	1.021	shortening	proximal
ENSG00000166669.13	ATF7IP2	24	chr16	10481836	10482118	+	APA	0.2566	0.041041	0.21556	0.988	K2	1.8736	shortening	proximal
ENSG00000159199.13	ATP5G1	16	chr17	48895870	48895871	+	APA	0.0045561	0.11465	-0.11009	0.988	K2	1.3258	shortening	distal
ENSG00000160058.18	BSDC1	27	chr1	32365113	32365170	-	APA	0.14639	0.25272	-0.10633	0.988	K3	1.5643	shortening	distal
ENSG00000257727.5	CNPY2	15	chr12	56310428	56310432	-	APA	0.063392	0.2716	-0.2082	0.988	K1	0.958	shortening	distal
ENSG00000152380.9	FAM151B	13	chr5	80542043	80542563	+	APA	0.44441	0.77961	-0.3352	0.988	K1	0.997	shortening	distal
ENSG00000116688.16	MFN2	26	chr1	12011496	12013508	+	APA	0.9895	0.83717	0.15233	0.988	K1	0.845	shortening	proximal
ENSG00000078403.16	MLLT10	12	chr10	21556678	21557025	+	APA	0.24134	0.017828	0.22352	0.988	K2	0.9813	shortening	proximal
ENSG00000130305.16	NSUN5	21	chr7	73303230	73303234	-	APA	0.86169	0.16776	0.69393	0.988	K2	1.4024	shortening	proximal
ENSG00000135778.11	NTPCR	11	chr1	232978652	232978722	+	APA	0.45453	0.098289	0.35624	0.988	K3	1.6165	shortening	proximal
ENSG00000138430.15	OLA1	18	chr2	174075008	174075009	-	APA	0.0033408	0.38132	-0.37798	0.988	K2	1.3957	shortening	distal
ENSG00000113068.9	PFDN1	12	chr5	140245125	140245346	-	APA	0.22744	0.053487	0.17395	0.988	K3	1.5033	shortening	proximal
ENSG00000060688.12	SNRNP40	18	chr1	31259674	31259709	-	APA	0.21114	0.0051621	0.20598	0.988	K3	1.1237	shortening	proximal
ENSG00000106868.16	SUSD1	21	chr9	112041079	112041492	-	APA	0.34043	0.059311	0.28112	0.988	K1	0.9722	shortening	proximal
ENSG00000197619.13	ZNF615	14	chr19	51992453	51992743	-	APA	0.38511	0.12811	0.257	0.988	K3	1.4863	shortening	proximal
ENSG00000177646.18	ACAD9	32	chr3	128913105	128913114	+	APA	0.0034601	0.10439	-0.10093	0.987	K3	2.242	shortening	distal
ENSG00000123191.14	ATP7B	35	chr13	51934693	51935029	-	APA	0.0066545	0.15095	-0.14429	0.987	K3	1.647	shortening	distal
ENSG00000149554.12	CHEK1	25	chr11	125655477	125655586	+	APA	0.24649	0.058517	0.18798	0.987	K2	0.8796	shortening	proximal
ENSG00000153885.14	KCTD15	17	chr19	33814244	33815763	+	APA	0.70986	0.83183	-0.12196	0.987	K2	1.1816	shortening	distal
ENSG00000103512.14	NOMO1	39	chr16	14896146	14896156	+	APA	0.80432	0.98886	-0.18454	0.987	K2	0.8628	shortening	distal
ENSG00000107263.18	RAPGEF1	27	chr9	131576770	131576777	-	APA	0.014859	0.21849	-0.20363	0.987	K1	0.9403	shortening	distal
ENSG00000155329.11	ZCCHC10	16	chr5	132996996	132998099	-	APA	0.0034163	0.13632	-0.13291	0.987	K3	2.2508	shortening	distal
ENSG00000147905.17	ZCCHC7	23	chr9	37356981	37357159	+	APA	0.15977	0.0047499	0.15502	0.987	K3	1.4768	shortening	proximal
ENSG00000158985.13	CDC42SE2	12	chr5	131394668	131394690	+	APA	0.00088069	0.10353	-0.10265	0.986	K2	0.8109	shortening	distal
ENSG00000161249.20	DMKN	38	chr19	35503306	35503330	-	APA	0.47004	0.11597	0.35407	0.986	K2	1.1847	shortening	proximal
ENSG00000152380.9	FAM151B	12	chr5	80541673	80542042	+	APA	0.55807	0.22245	0.33561	0.986	K1	0.997	shortening	proximal
ENSG00000124743.5	KLHL31	4	chr6	53651598	53652330	-	APA	0.32921	0.03741	0.2918	0.986	K1	0.9968	shortening	proximal
ENSG00000107263.18	RAPGEF1	26	chr9	131576778	131579647	-	APA	0.98505	0.78102	0.20403	0.986	K1	0.9403	shortening	proximal
ENSG00000141622.13	RNF165	12	chr18	46456519	46460820	+	APA	0.81689	0.45029	0.36661	0.986	K1	0.9985	shortening	proximal
ENSG00000158286.12	RNF207	5	chr1	6207379	6207564	+	APA	0.53452	0.14999	0.38453	0.986	K1	0.998	shortening	proximal
ENSG00000176014.12	TUBB6	18	chr18	12325915	12326563	+	APA	0.74513	0.8627	-0.11757	0.986	K3	1.0637	shortening	distal
ENSG00000143179.14	UCK2	11	chr1	165907872	165908100	+	APA	0.40218	0.54215	-0.13997	0.986	K2	1.9668	shortening	distal
ENSG00000172409.5	CLP1	7	chr11	57660765	57661436	+	APA	0.12821	0.0064115	0.1218	0.985	K2	0.7384	shortening	proximal
ENSG00000134824.13	FADS2	20	chr11	61865958	61867347	+	APA	0.49224	0.69872	-0.20648	0.985	K2	1.0059	shortening	distal
ENSG00000116209.11	TMEM59	19	chr1	54031676	54031965	-	APA	0.46363	0.36789	0.095746	0.985	K3	1.7396	shortening	proximal
ENSG00000142794.18	NBPF3	28	chr1	21483468	21484900	+	APA	0.78483	0.96236	-0.17753	0.985	K2	0.8374	shortening	distal
ENSG00000101417.11	PXMP4	8	chr20	33707269	33707488	-	APA	0.33771	0.43413	-0.096411	0.985	K2	1.5354	shortening	distal
ENSG00000150961.14	SEC24D	43	chr4	118722830	118723023	-	APA	0.33064	0.5694	-0.23876	0.985	K2	1.5478	shortening	distal
ENSG00000147955.16	SIGMAR1	13	chr9	34635483	34635496	-	APA	0.25299	0.096902	0.15608	0.985	K2	1.0542	shortening	proximal
ENSG00000171574.17	ZNF584	17	chr19	58417092	58418310	+	APA	0.85789	0.43515	0.42274	0.985	K2	1.5912	shortening	proximal
ENSG00000171791.12	BCL2	8	chr18	63123346	63127034	-	APA	0.72658	0.84348	-0.1169	0.984	K1	0.8796	shortening	distal
ENSG00000257727.5	CNPY2	14	chr12	56310433	56310595	-	APA	0.93713	0.72841	0.20872	0.984	K1	0.958	shortening	proximal
ENSG00000078403.16	MLLT10	13	chr10	21557026	21557182	+	APA	0.7581	0.98225	-0.22415	0.984	K2	0.9813	shortening	distal
ENSG00000128309.16	MPST	9	chr22	37029216	37029801	+	APA	0.19423	0.0056348	0.1886	0.984	K2	0.9489	shortening	proximal
ENSG00000213225.7	NOC2LP1	3	chr2	130231614	130232106	+	APA	0.53951	0.73507	-0.19556	0.984	K1	0.9999	shortening	distal
ENSG00000103512.14	NOMO1	38	chr16	14895973	14896145	+	APA	0.19581	0.011209	0.1846	0.984	K2	0.8628	shortening	proximal
ENSG00000141622.13	RNF165	13	chr18	46460821	46463140	+	APA	0.18284	0.55089	-0.36804	0.984	K1	0.9985	shortening	distal
ENSG00000130304.16	SLC27A1	22	chr19	17504987	17506168	+	APA	0.58667	0.88333	-0.29666	0.984	K1	0.983	shortening	distal
ENSG00000113658.16	SMAD5	10	chr5	136153764	136154144	+	APA	0.43586	0.62575	-0.18989	0.984	K2	1.5431	shortening	distal
ENSG00000066427.21	ATXN3	44	chr14	92038652	92044774	-	APA	0.98459	0.68845	0.29614	0.983	K2	0.9975	shortening	distal
ENSG00000154813.9	DPH3	7	chr3	16260424	16260829	-	APA	0.63029	0.52747	0.10282	0.983	K2	1.7894	shortening	proximal
ENSG00000196712.17	NF1	84	chr17	31374130	31374287	+	APA	0.40322	0.10716	0.29607	0.983	K1	0.9996	shortening	proximal
ENSG00000132356.11	PRKAA1	19	chr5	40762770	40763022	-	APA	0.44875	0.3399	0.10884	0.983	K1	1	shortening	proximal
ENSG00000147526.19	TACC1	40	chr8	38848133	38848276	+	APA	0.16882	0.0021793	0.16664	0.983	K3	1.4136	shortening	proximal
ENSG00000198420.9	TCAF1	20	chr7	143851375	143853695	-	APA	0.82996	0.97588	-0.14592	0.983	K2	0.8257	shortening	distal
ENSG00000168710.17	AHCYL1	25	chr1	110023736	110023741	+	APA	0.35972	0.56472	-0.205	0.982	K2	1.2065	shortening	distal
ENSG00000066427.21	ATXN3	42	chr14	92044806	92044958	-	APA	0.014609	0.31075	-0.29614	0.982	K2	0.9975	shortening	proximal
ENSG00000171791.12	BCL2	7	chr18	63127035	63128759	-	APA	0.27296	0.15667	0.11629	0.982	K1	0.8796	shortening	proximal
ENSG00000075240.16	GRAMD4	22	chr22	46679684	46679785	+	APA	0.71	0.90753	-0.19752	0.982	K2	1.1089	shortening	distal
ENSG00000248360.7	LINC00504	12	chr4	14474085	14474563	-	APA	0.69374	0.37524	0.31849	0.982	K1	0.9942	shortening	proximal
ENSG00000116688.16	MFN2	27	chr1	12013509	12013514	+	APA	0.01047	0.16261	-0.15214	0.982	K1	0.845	shortening	distal
ENSG00000167306.19	MYO5B	41	chr18	49826290	49826623	-	APA	0.15964	0.028094	0.13155	0.982	K2	1.2103	shortening	proximal
ENSG00000103034.14	NDRG4	36	chr16	58511671	58511735	+	APA	0.33236	0.06008	0.27228	0.982	K4	1.8521	shortening	proximal
ENSG00000089818.17	NECAP1	18	chr12	8097731	8097769	+	APA	0.84386	0.99775	-0.15388	0.982	K2	0.9247	shortening	distal
ENSG00000147955.16	SIGMAR1	14	chr9	34634722	34635482	-	APA	0.73104	0.88784	-0.1568	0.982	K2	1.0542	shortening	distal
ENSG00000130304.16	SLC27A1	21	chr19	17504455	17504986	+	APA	0.41195	0.11562	0.29633	0.982	K1	0.983	shortening	proximal
ENSG00000106868.16	SUSD1	22	chr9	112040785	112041078	-	APA	0.66031	0.94019	-0.27988	0.982	K1	0.9722	shortening	distal
ENSG00000092439.13	TRPM7	45	chr15	50561640	50561808	-	APA	0.19883	0.012045	0.18678	0.982	K2	0.9486	shortening	proximal
ENSG00000149554.12	CHEK1	26	chr11	125655587	125655710	+	APA	0.75282	0.94082	-0.188	0.981	K2	0.8796	shortening	distal
ENSG00000128309.16	MPST	10	chr22	37029802	37029812	+	APA	0.80536	0.99436	-0.18899	0.981	K2	0.9489	shortening	distal
ENSG00000186184.16	POLR1D	15	chr13	27665686	27666260	+	APA	0.13073	0.019175	0.11156	0.981	K3	1.5079	shortening	proximal
ENSG00000150961.14	SEC24D	41	chr4	118723521	118723655	-	APA	0.24721	0.02238	0.22483	0.981	K2	1.5478	shortening	proximal
ENSG00000184867.13	ARMCX2	24	chrX	101655467	101657086	-	APA	0.11123	0.0060324	0.1052	0.98	K3	1.4385	shortening	medium
ENSG00000113916.17	BCL6	21	chr3	187721377	187721386	-	APA	0.011963	0.24603	-0.23406	0.98	K2	1.055	shortening	distal
ENSG00000075240.16	GRAMD4	21	chr22	46677147	46679683	+	APA	0.25152	0.042905	0.20862	0.98	K2	1.1089	shortening	proximal
ENSG00000145332.13	KLHL8	19	chr4	87162522	87163642	-	APA	0.10136	0.0062928	0.095064	0.98	K3	2.0813	shortening	proximal
ENSG00000213225.7	NOC2LP1	2	chr2	130231355	130231613	+	APA	0.46211	0.26485	0.19726	0.98	K1	0.9999	shortening	proximal
ENSG00000181031.15	RPH3AL	13	chr17	213645	213923	-	APA	0.12411	0.0084959	0.11561	0.98	K2	1.384	shortening	proximal
ENSG00000183207.13	RUVBL2	24	chr19	49015817	49015926	+	APA	0.28573	0.013068	0.27266	0.98	K2	1.1384	shortening	proximal
ENSG00000155380.11	SLC16A1	11	chr1	112914025	112914165	-	APA	0.54132	0.42638	0.11494	0.98	K2	1.1102	shortening	proximal
ENSG00000153914.15	SREK1	35	chr5	66179115	66180811	+	APA	0.18604	0.06276	0.12328	0.98	K3	1.4489	shortening	proximal
ENSG00000198420.9	TCAF1	19	chr7	143853696	143853827	-	APA	0.17038	0.024021	0.14636	0.98	K2	0.8257	shortening	proximal
ENSG00000151090.17	THRB	28	chr3	24118210	24122207	-	APA	0.76101	0.94236	-0.18135	0.98	K1	0.8622	shortening	distal
ENSG00000066629.16	EML1	30	chr14	99939987	99940324	+	APA	0.32537	0.093096	0.23227	0.979	K1	0.9931	shortening	proximal
ENSG00000108587.15	GOSR1	24	chr17	30522806	30527592	+	APA	0.27725	0.37505	-0.097799	0.979	K2	1.748	shortening	distal
ENSG00000130305.16	NSUN5	22	chr7	73303225	73303229	-	APA	0.017782	0.25674	-0.23896	0.979	K2	1.4024	shortening	distal
ENSG00000167525.13	PROCA1	7	chr17	28704081	28704212	-	APA	0.031776	0.23085	-0.19908	0.979	K2	1.5749	shortening	distal
ENSG00000092203.13	TOX4	16	chr14	21492607	21492812	+	APA	0.50174	0.63995	-0.13821	0.979	K1	1	shortening	distal
ENSG00000281571.2	AC241585.3	2	chr1	145215906	145215938	+	APA	0.20125	0.55776	-0.3565	0.978	K1	0.9994	shortening	distal
ENSG00000182973.18	CNOT10	33	chr3	32773872	32773875	+	APA	0.007614	0.19544	-0.18782	0.978	K3	1.6889	shortening	distal
ENSG00000108591.9	DRG2	29	chr17	18107154	18107941	+	APA	0.9742	0.71381	0.2604	0.978	K2	1.2863	shortening	proximal
ENSG00000100335.13	MIEF1	22	chr22	39516381	39518132	+	APA	0.36772	0.48319	-0.11547	0.978	K2	1.556	shortening	distal
ENSG00000153944.10	MSI2	27	chr17	57632901	57632905	+	APA	0.0064372	0.4163	-0.40987	0.978	K2	1.3712	shortening	distal
ENSG00000145675.14	PIK3R1	26	chr5	68297412	68298583	+	APA	0.28987	0.19465	0.095222	0.978	K2	1.2167	shortening	proximal
ENSG00000135778.11	NTPCR	12	chr1	232978723	232978751	+	APA	0.33273	0.61372	-0.28099	0.978	K3	1.6165	shortening	distal
ENSG00000112183.14	RBM24	12	chr6	17293031	17293866	+	APA	0.26028	0.40424	-0.14396	0.978	K3	1.5737	shortening	distal
ENSG00000148737.16	TCF7L2	32	chr10	113166161	113166309	+	APA	0.012448	0.21556	-0.20312	0.978	K3	1.5824	shortening	distal
ENSG00000066629.16	EML1	31	chr14	99940325	99942060	+	APA	0.6736	0.90684	-0.23324	0.977	K1	0.9931	shortening	distal
ENSG00000249115.8	HAUS5	25	chr19	35622885	35623557	+	APA	0.0044344	0.13662	-0.13219	0.977	K2	1.3193	shortening	distal
ENSG00000102882.11	MAPK3	21	chr16	30114546	30114615	-	APA	0.15933	0.35726	-0.19794	0.977	K3	1.922	shortening	distal
ENSG00000008838.19	MED24	49	chr17	40019129	40019172	-	APA	0.53698	0.84921	-0.31223	0.977	K3	1.3935	shortening	distal
ENSG00000196712.17	NF1	85	chr17	31374288	31377677	+	APA	0.59705	0.89241	-0.29537	0.977	K1	0.9996	shortening	distal
ENSG00000213889.10	PPM1N	9	chr19	45502017	45502310	+	APA	0.7683	0.21836	0.54994	0.977	K2	1.5315	shortening	proximal
ENSG00000168297.15	PXK	29	chr3	58425059	58425151	+	APA	0.26727	0.043737	0.22353	0.977	K3	1.3247	shortening	proximal
ENSG00000092203.13	TOX4	15	chr14	21492508	21492606	+	APA	0.4986	0.35993	0.13867	0.977	K1	1	shortening	proximal
ENSG00000173175.14	ADCY5	27	chr3	123284446	123284577	-	APA	0.28285	0.018653	0.2642	0.976	K2	1.7422	shortening	proximal
ENSG00000157895.11	C12orf43	14	chr12	121003876	121003891	-	APA	0.34911	0.16709	0.18203	0.976	K2	1.5372	shortening	proximal
ENSG00000115163.14	CENPA	10	chr2	26794590	26794593	+	APA	0.0073579	0.45411	-0.44675	0.976	K1	0.9766	shortening	distal
ENSG00000215908.10	CROCCP2	26	chr1	16618253	16618255	-	APA	0.0089134	0.39656	-0.38764	0.976	K2	1.3598	shortening	distal
ENSG00000146063.19	TRIM41	20	chr5	181235804	181235806	+	APA	0.0077709	0.39704	-0.38927	0.976	K3	1.0724	shortening	distal
ENSG00000158552.12	ZFAND2B	27	chr2	219209262	219209606	+	APA	0.23328	0.05529	0.17799	0.976	K2	0.8326	shortening	proximal
ENSG00000159348.12	CYB5R1	16	chr1	202962550	202962699	-	APA	0.29514	0.088608	0.20653	0.975	K2	1.5745	shortening	proximal
ENSG00000108591.9	DRG2	30	chr17	18107942	18107969	+	APA	0.02268	0.24749	-0.22481	0.975	K2	1.2863	shortening	distal
ENSG00000217128.11	FNIP1	24	chr5	131641714	131644436	-	APA	0.55061	0.74738	-0.19677	0.975	K1	0.9937	shortening	distal
ENSG00000133398.3	MED10	7	chr5	6372165	6372601	-	APA	0.50991	0.37512	0.13478	0.975	K1	0.9997	shortening	proximal
ENSG00000092931.11	MFSD11	27	chr17	76778188	76778572	+	APA	0.439	0.24584	0.19316	0.975	K2	1.4453	shortening	proximal
ENSG00000023734.10	STRAP	17	chr12	15903015	15903442	+	APA	0.40008	0.50933	-0.10925	0.975	K2	1.5588	shortening	distal
ENSG00000167723.14	TRPV3	29	chr17	3513821	3513845	-	APA	0.63202	0.12343	0.50859	0.975	K2	1.4431	shortening	proximal
ENSG00000197782.14	ZNF780A	23	chr19	40071006	40072649	-	APA	0.19058	0.050604	0.13997	0.975	K1	0.8947	shortening	proximal
ENSG00000170340.10	B3GNT2	3	chr2	62222212	62224549	+	APA	0.76127	0.65129	0.10998	0.974	K1	0.9565	shortening	proximal
ENSG00000198746.12	GPATCH3	8	chr1	26891057	26891226	-	APA	0.16897	0.013187	0.15579	0.974	K1	0.8701	shortening	proximal
ENSG00000185480.11	PARPBP	22	chr12	102196668	102197361	+	APA	0.041707	0.23028	-0.18857	0.974	K2	1.6945	shortening	distal
ENSG00000090857.13	PDPR	31	chr16	70157235	70158315	+	APA	0.038798	0.20108	-0.16228	0.974	K3	1.4889	shortening	distal
ENSG00000155846.16	PPARGC1B	23	chr5	149847719	149847757	+	APA	0.0045871	0.29577	-0.29118	0.974	K3	2.1006	shortening	distal
ENSG00000172922.8	RNASEH2C	11	chr11	65719721	65719809	-	APA	0.66374	0.56561	0.098131	0.974	K2	1.4302	shortening	proximal
ENSG00000133812.15	SBF2	50	chr11	9778667	9779153	-	APA	0.19603	0.3504	-0.15437	0.974	K1	0.9458	shortening	distal
ENSG00000181045.14	SLC26A11	28	chr17	80253499	80253500	+	APA	0.10837	0.50127	-0.39289	0.974	K2	0.9966	shortening	distal
ENSG00000146063.19	TRIM41	19	chr5	181235354	181235803	+	APA	0.9927	0.59463	0.39807	0.974	K3	1.0724	shortening	proximal
ENSG00000136631.12	VPS45	35	chr1	150144926	150145288	+	APA	0.20303	0.039502	0.16353	0.974	K2	1.0812	shortening	proximal
ENSG00000134824.13	FADS2	19	chr11	61865638	61865957	+	APA	0.50579	0.30094	0.20485	0.973	K2	1.0059	shortening	proximal
ENSG00000109790.16	KLHL5	19	chr4	39122209	39122209	+	APA	0.021081	0.14078	-0.1197	0.973	K2	1.2466	shortening	distal
ENSG00000163743.13	RCHY1	21	chr4	75482342	75482537	-	APA	0.15722	0.27362	-0.11639	0.973	K3	2.2365	shortening	distal
ENSG00000155380.11	SLC16A1	12	chr1	112911852	112914024	-	APA	0.44286	0.55353	-0.11067	0.973	K2	1.1102	shortening	distal
ENSG00000163945.16	UVSSA	24	chr4	1386259	1386412	+	APA	0.0098895	0.19875	-0.18886	0.973	K3	0.9997	shortening	proximal
ENSG00000158552.12	ZFAND2B	28	chr2	219209607	219209647	+	APA	0.76762	0.9438	-0.17618	0.973	K2	0.8326	shortening	distal
ENSG00000121989.14	ACVR2A	18	chr2	147927080	147927504	+	APA	0.35554	0.074662	0.28088	0.972	K2	1.8129	shortening	proximal
ENSG00000095059.15	DHPS	21	chr19	12675762	12675933	-	APA	0.019522	0.18102	-0.1615	0.972	K2	0.9978	shortening	distal
ENSG00000129682.15	FGF13	13	chrX	138632678	138632702	-	APA	0.038903	0.25277	-0.21386	0.972	K2	0.9306	shortening	distal
ENSG00000133398.3	MED10	8	chr5	6371881	6372164	-	APA	0.48946	0.62477	-0.13531	0.972	K1	0.9997	shortening	distal
ENSG00000132356.11	PRKAA1	20	chr5	40759379	40762769	-	APA	0.55132	0.65966	-0.10834	0.972	K1	1	shortening	distal
ENSG00000112183.14	RBM24	11	chr6	17293024	17293030	+	APA	0.69809	0.45124	0.24685	0.972	K3	1.5737	shortening	medium
ENSG00000133812.15	SBF2	49	chr11	9779154	9780516	-	APA	0.80472	0.65003	0.1547	0.972	K1	0.9458	shortening	proximal
ENSG00000168710.17	AHCYL1	24	chr1	110022390	110023735	+	APA	0.60536	0.41413	0.19123	0.971	K2	1.2065	shortening	proximal
ENSG00000141568.20	FOXK2	18	chr17	82602393	82602405	+	APA	0.094782	0.33877	-0.24399	0.971	K2	1.8148	shortening	distal
ENSG00000234741.7	GAS5	20	chr1	173865168	173865228	-	APA	0.39168	0.0093947	0.38229	0.971	K1	0.9975	shortening	proximal
ENSG00000234741.7	GAS5	21	chr1	173864955	173865167	-	APA	0.60865	0.99045	-0.3818	0.971	K1	0.9975	shortening	distal
ENSG00000138430.15	OLA1	17	chr2	174075010	174075189	-	APA	0.92994	0.41548	0.51446	0.971	K2	1.3957	shortening	proximal
ENSG00000184588.17	PDE4B	22	chr1	66372739	66373504	+	APA	0.11857	0.40062	-0.28205	0.971	K3	1.7433	shortening	distal
ENSG00000075856.11	SART3	32	chr12	108523412	108523634	-	APA	0.26387	0.059338	0.20453	0.971	K2	1.5834	shortening	proximal
ENSG00000084090.13	STARD7	15	chr2	96184867	96186749	-	APA	0.97759	0.8719	0.10569	0.971	K2	0.9044	shortening	proximal
ENSG00000170340.10	B3GNT2	4	chr2	62224550	62224731	+	APA	0.23792	0.34873	-0.11081	0.97	K1	0.9565	shortening	distal
ENSG00000154832.14	CXXC1	44	chr18	50282347	50282348	-	APA	0.013174	0.32096	-0.30778	0.97	K3	1.2153	shortening	distal
ENSG00000120690.15	ELF1	15	chr13	40932034	40933351	-	APA	0.56125	0.66394	-0.10269	0.97	K2	1.4047	shortening	distal
ENSG00000217128.11	FNIP1	23	chr5	131644437	131644763	-	APA	0.44949	0.25229	0.1972	0.97	K1	0.9937	shortening	proximal
ENSG00000167468.16	GPX4	21	chr19	1106780	1106788	+	APA	0.16849	0.2766	-0.1081	0.97	K2	0.891	shortening	distal
ENSG00000123342.15	MMP19	21	chr12	55836426	55836969	-	APA	0.23545	0.027987	0.20746	0.97	K2	1.2358	shortening	proximal
ENSG00000115840.13	SLC25A12	24	chr2	171784775	171784831	-	APA	0.012331	0.14833	-0.136	0.97	K2	1.51	shortening	distal
ENSG00000163071.10	SPATA18	17	chr4	52095894	52097292	+	APA	0.60467	0.89522	-0.29055	0.97	K1	0.9799	shortening	distal
ENSG00000177156.10	TALDO1	18	chr11	764948	765012	+	APA	0.34948	0.45008	-0.1006	0.97	K2	0.9993	shortening	distal
ENSG00000184867.13	ARMCX2	25	chrX	101655281	101655466	-	APA	0.71984	0.94883	-0.229	0.969	K3	1.4385	shortening	distal
ENSG00000108963.17	DPH1	26	chr17	2042605	2042690	+	APA	0.17106	0.0098391	0.16122	0.969	K3	1.6954	shortening	proximal
ENSG00000141568.20	FOXK2	17	chr17	82601303	82602392	+	APA	0.63765	0.37757	0.26008	0.969	K2	1.8148	shortening	proximal
ENSG00000168621.14	GDNF	10	chr5	37812677	37815650	-	APA	0.46541	0.87216	-0.40676	0.969	K2	1.1871	shortening	distal
ENSG00000198265.11	HELZ	40	chr17	67070438	67077928	-	APA	0.40651	0.50442	-0.097911	0.969	K2	1.4077	shortening	distal
ENSG00000198015.12	MRPL42	16	chr12	93502622	93502661	+	APA	0.0848	0.21678	-0.13198	0.969	K2	0.875	shortening	distal
ENSG00000151090.17	THRB	27	chr3	24122208	24123125	-	APA	0.23897	0.057871	0.1811	0.969	K1	0.8622	shortening	proximal
ENSG00000161558.10	TMEM143	19	chr19	48332361	48333275	-	APA	0.86022	0.18173	0.67848	0.969	K2	1.0152	shortening	proximal
ENSG00000281571.2	AC241585.3	1	chr1	145214851	145215905	+	APA	0.79891	0.44151	0.35739	0.968	K1	0.9994	shortening	proximal
ENSG00000112186.11	CAP2	27	chr6	17556660	17556795	+	APA	0.075547	0.32159	-0.24604	0.968	K3	1.7385	shortening	distal
ENSG00000198746.12	GPATCH3	9	chr1	26890489	26891056	-	APA	0.83076	0.98633	-0.15557	0.968	K1	0.8701	shortening	distal
ENSG00000163719.19	MTMR14	30	chr3	9702217	9702387	+	APA	0.013974	0.17126	-0.15729	0.968	K3	2.0188	shortening	distal
ENSG00000170854.17	RIOX2	27	chr3	97944351	97944405	-	APA	0.34004	0.47927	-0.13923	0.968	K3	1.8356	shortening	distal
ENSG00000133805.15	AMPD3	37	chr11	10505813	10505884	+	APA	0.060932	0.47446	-0.41353	0.967	K3	1.9886	shortening	distal
ENSG00000138794.9	CASP6	13	chr4	109689263	109689568	-	APA	0.0068475	0.2375	-0.23065	0.967	K3	1.9024	shortening	distal
ENSG00000161999.11	JMJD8	16	chr16	682772	682874	-	APA	0.12035	0.00081321	0.11954	0.967	K3	1.6226	shortening	proximal
ENSG00000160796.16	NBEAL2	67	chr3	47009219	47009548	+	APA	0.29486	0.018733	0.27612	0.967	K2	1.5453	shortening	proximal
ENSG00000153406.13	NMRAL1	17	chr16	4461694	4461694	-	APA	0.016875	0.16314	-0.14626	0.967	K3	1.9598	shortening	distal
ENSG00000071564.14	TCF3	38	chr19	1609290	1609292	-	APA	0.018511	0.24965	-0.23114	0.967	K2	1.5421	shortening	distal
ENSG00000172663.8	TMEM134	29	chr11	67464392	67464463	-	APA	0.10204	0.31548	-0.21344	0.967	K3	1.851	shortening	distal
ENSG00000167645.16	YIF1B	25	chr19	38305362	38305507	-	APA	0.19848	0.4183	-0.21982	0.967	K3	1.5021	shortening	distal
ENSG00000169756.16	LIMS1	25	chr2	108687239	108687246	+	APA	0.021386	0.27417	-0.25279	0.966	K2	1.9419	shortening	distal
ENSG00000153898.12	MCOLN2	19	chr1	84925908	84926425	-	APA	0.204	0.39932	-0.19532	0.966	K2	1.4793	shortening	distal
ENSG00000118596.11	SLC16A7	18	chr12	59780214	59789855	+	APA	0.43427	0.54073	-0.10646	0.966	K3	1.5415	shortening	distal
ENSG00000177156.10	TALDO1	17	chr11	764813	764947	+	APA	0.65102	0.55053	0.10049	0.966	K2	0.9993	shortening	proximal
ENSG00000092439.13	TRPM7	46	chr15	50560293	50561639	-	APA	0.79562	0.98147	-0.18585	0.966	K2	0.9486	shortening	distal
ENSG00000197782.14	ZNF780A	24	chr19	40069152	40071005	-	APA	0.80944	0.94931	-0.13987	0.966	K1	0.8947	shortening	distal
ENSG00000175866.15	BAIAP2	39	chr17	81115818	81116048	+	APA	0.14808	0.01048	0.1376	0.965	K2	0.9101	shortening	proximal
ENSG00000171302.16	CANT1	21	chr17	78991717	78993486	-	APA	0.45275	0.55738	-0.10463	0.965	K2	1.5497	shortening	distal
ENSG00000196670.13	ZFP62	8	chr5	180848138	180850914	-	APA	0.85713	0.95705	-0.099915	0.965	K1	0.6805	shortening	distal
ENSG00000237491.8	AL669831.5	2	chr1	784760	784977	+	APA	0.36236	0.7776	-0.41524	0.964	K2	1.536	shortening	distal
ENSG00000112186.11	CAP2	25	chr6	17556565	17556568	+	APA	0.33417	0.12576	0.20841	0.964	K3	1.7385	shortening	proximal
ENSG00000115163.14	CENPA	9	chr2	26793894	26794589	+	APA	0.99256	0.54639	0.44617	0.964	K1	0.9766	shortening	proximal
ENSG00000138030.12	KHK	12	chr2	27099970	27100751	+	APA	0.21858	0.021089	0.19749	0.964	K2	0.9718	shortening	proximal
ENSG00000106133.17	NSUN5P2	18	chr7	72948485	72948597	-	APA	0.13163	0.015123	0.1165	0.964	K2	0.7476	shortening	proximal
ENSG00000185627.17	PSMD13	26	chr11	252505	252617	+	APA	0.48669	0.35632	0.13037	0.964	K2	1.5842	shortening	proximal
ENSG00000105711.11	SCN1B	16	chr19	35040074	35040449	+	APA	0.76272	0.98232	-0.21959	0.964	K1	0.9876	shortening	distal
ENSG00000103528.16	SYT17	16	chr16	19267129	19268334	+	APA	0.73088	0.97922	-0.24834	0.964	K2	0.9677	shortening	distal
ENSG00000161249.20	DMKN	39	chr19	35503304	35503305	-	APA	0.014888	0.25972	-0.24483	0.963	K2	1.1847	shortening	distal
ENSG00000099849.14	RASSF7	15	chr11	564013	564018	+	APA	0.79709	0.99358	-0.19648	0.963	K2	0.9866	shortening	distal
ENSG00000101187.15	SLCO4A1	19	chr20	62672294	62672295	+	APA	0.82859	0.99232	-0.16372	0.963	K1	0.9383	shortening	distal
ENSG00000186787.8	SPIN2B	6	chrX	57119888	57120631	-	APA	0.32632	0.09466	0.23166	0.963	K2	1.3448	shortening	proximal
ENSG00000186787.8	SPIN2B	7	chrX	57119683	57119887	-	APA	0.56959	0.76513	-0.19554	0.963	K2	1.3448	shortening	distal
ENSG00000006459.10	KDM7A	23	chr7	140090903	140091188	-	APA	0.015237	0.14459	-0.12935	0.962	K2	1.4242	shortening	distal
ENSG00000138670.17	RASGEF1B	25	chr4	81427449	81427792	-	APA	0.51182	0.12879	0.38303	0.962	K1	0.9868	shortening	proximal
ENSG00000161558.10	TMEM143	21	chr19	48332356	48332356	-	APA	0.01618	0.12931	-0.11313	0.962	K2	1.0152	shortening	distal
ENSG00000196670.13	ZFP62	7	chr5	180850915	180851380	-	APA	0.1431	0.043022	0.10008	0.962	K1	0.6805	shortening	proximal
ENSG00000026103.21	FAS	19	chr10	89014451	89014584	+	APA	0.017179	0.26214	-0.24496	0.961	K3	1.7179	shortening	distal
ENSG00000131981.15	LGALS3	10	chr14	55145116	55145403	+	APA	0.16892	0.050986	0.11793	0.961	K1	0.7419	shortening	proximal
ENSG00000123342.15	MMP19	22	chr12	55835433	55836425	-	APA	0.74754	0.97147	-0.22393	0.961	K2	1.2358	shortening	distal
ENSG00000176014.12	TUBB6	15	chr18	12325268	12325353	+	APA	0.23306	0.13718	0.095876	0.961	K3	1.0637	shortening	proximal
ENSG00000113712.17	CSNK1A1	20	chr5	149495896	149496053	-	APA	0.55752	0.70518	-0.14766	0.96	K2	1.4033	shortening	distal
ENSG00000093144.18	ECHDC1	16	chr6	127289634	127289779	-	APA	0.024588	0.2002	-0.17562	0.96	K3	1.8846	shortening	distal
ENSG00000163071.10	SPATA18	16	chr4	52094880	52095893	+	APA	0.39554	0.10396	0.29158	0.96	K1	0.9799	shortening	proximal
ENSG00000115866.10	DARS	28	chr2	135906677	135906823	-	APA	0.55645	0.6821	-0.12565	0.959	K2	0.9975	shortening	distal
ENSG00000112511.17	PHF1	19	chr6	33415810	33416051	+	APA	0.0417	0.21125	-0.16954	0.959	K2	1.5202	shortening	distal
ENSG00000138670.17	RASGEF1B	26	chr4	81427065	81427448	-	APA	0.4934	0.87312	-0.37972	0.959	K1	0.9868	shortening	distal
ENSG00000137075.17	RNF38	15	chr9	36339581	36339814	-	APA	0.26763	0.064112	0.20352	0.959	K1	0.9703	shortening	proximal
ENSG00000170832.12	USP32	45	chr17	60179105	60179428	-	APA	0.61875	0.49411	0.12465	0.959	K1	0.9991	shortening	proximal
ENSG00000103356.15	EARS2	27	chr16	23522014	23522016	-	APA	0.01448	0.35062	-0.33614	0.958	K3	1.5766	shortening	distal
ENSG00000095951.16	HIVEP1	14	chr6	12163283	12164575	+	APA	0.6393	0.47944	0.15987	0.958	K1	0.9999	shortening	proximal
ENSG00000118961.14	LDAH	15	chr2	20684412	20684875	-	APA	0.34819	0.11989	0.2283	0.958	K1	0.994	shortening	proximal
ENSG00000007047.14	MARK4	26	chr19	45302374	45303369	+	APA	0.25949	0.090099	0.16939	0.958	K2	0.9805	shortening	proximal
ENSG00000198015.12	MRPL42	15	chr12	93501905	93502621	+	APA	0.90361	0.7689	0.13471	0.958	K2	0.875	shortening	proximal
ENSG00000167306.19	MYO5B	42	chr18	49826260	49826289	-	APA	0.71485	0.82892	-0.11407	0.958	K2	1.2103	shortening	distal
ENSG00000101187.15	SLCO4A1	18	chr20	62671750	62672293	+	APA	0.17186	0.0078363	0.16402	0.958	K1	0.9383	shortening	proximal
ENSG00000131269.15	ABCB7	27	chrX	75053284	75053444	-	APA	0.22128	0.021514	0.19976	0.957	K3	1.2193	shortening	proximal
ENSG00000127946.16	HIP1	37	chr7	75538083	75538224	-	APA	0.30388	0.095987	0.20789	0.957	K2	0.9506	shortening	proximal
ENSG00000117676.13	RPS6KA1	30	chr1	26574079	26574276	+	APA	0.071596	0.29541	-0.22381	0.957	K2	0.9999	shortening	distal
ENSG00000196792.11	STRN3	18	chr14	30893799	30895344	-	APA	0.67259	0.80583	-0.13324	0.957	K1	0.9834	shortening	distal
ENSG00000085982.13	USP40	45	chr2	233477392	233477503	-	APA	0.4513	0.26426	0.18704	0.957	K2	1.0353	shortening	proximal
ENSG00000185722.16	ANKFY1	33	chr17	4167836	4167911	-	APA	0.94809	0.84913	0.09896	0.956	K2	0.8778	shortening	proximal
ENSG00000147996.16	CBWD5	43	chr9	65731868	65732241	+	APA	0.30086	0.06677	0.23409	0.956	K1	0.9754	shortening	proximal
ENSG00000160818.16	GPATCH4	22	chr1	156594487	156595212	-	APA	0.75689	0.87776	-0.12087	0.956	K2	1.1487	shortening	distal
ENSG00000095066.11	HOOK2	14	chr19	12773952	12774077	-	APA	0.27014	0.46181	-0.19167	0.956	K2	1.8729	shortening	distal
ENSG00000127054.20	INTS11	61	chr1	1311602	1311605	-	APA	0.0079196	0.26995	-0.26203	0.956	K3	1.5124	shortening	distal
ENSG00000206053.12	JPT2	12	chr16	1698977	1699266	+	APA	0.28411	0.11748	0.16663	0.956	K3	1.8945	shortening	proximal
ENSG00000182324.6	KCNJ14	5	chr19	48466022	48466980	+	APA	0.33888	0.65159	-0.31271	0.956	K1	0.9786	shortening	distal
ENSG00000158006.13	PAFAH2	13	chr1	25960770	25962083	-	APA	0.30577	0.16738	0.13839	0.956	K1	0.9171	shortening	proximal
ENSG00000137075.17	RNF38	16	chr9	36336396	36339580	-	APA	0.73197	0.93579	-0.20382	0.956	K1	0.9703	shortening	distal
ENSG00000116497.17	S100PBP	17	chr1	32855924	32856185	+	APA	0.29202	0.18119	0.11083	0.956	K2	0.9424	shortening	proximal
ENSG00000062370.16	ZNF112	8	chr19	44326943	44329787	-	APA	0.12314	0.3633	-0.24016	0.956	K2	1.5785	shortening	distal
ENSG00000140995.16	DEF8	19	chr16	89959364	89959366	+	APA	0.017324	0.37417	-0.35684	0.955	K1	0.9901	shortening	distal
ENSG00000140995.16	DEF8	18	chr16	89959156	89959363	+	APA	0.98247	0.62535	0.35712	0.955	K1	0.9901	shortening	proximal
ENSG00000137133.10	HINT2	13	chr9	35812974	35813145	-	APA	0.48751	0.13868	0.34883	0.955	K1	0.9864	shortening	proximal
ENSG00000123411.14	IKZF4	14	chr12	56034571	56035331	+	APA	0.0056616	0.11287	-0.10721	0.955	K3	1.7731	shortening	distal
ENSG00000182324.6	KCNJ14	4	chr19	48464181	48466021	+	APA	0.66077	0.34892	0.31186	0.955	K1	0.9786	shortening	proximal
ENSG00000099849.14	RASSF7	14	chr11	563558	564012	+	APA	0.2033	0.006257	0.19704	0.955	K2	0.9866	shortening	proximal
ENSG00000105711.11	SCN1B	15	chr19	35039797	35040073	+	APA	0.23672	0.017603	0.21912	0.955	K1	0.9876	shortening	proximal
ENSG00000187118.12	CMC1	13	chr3	28319742	28319762	+	APA	0.020719	0.18218	-0.16146	0.954	K3	1.1764	shortening	distal
ENSG00000095951.16	HIVEP1	15	chr6	12164576	12164999	+	APA	0.3595	0.52096	-0.16145	0.954	K1	0.9999	shortening	distal
ENSG00000138750.14	NUP54	23	chr4	76115206	76115300	-	APA	0.30076	0.14373	0.15703	0.954	K3	1.8995	shortening	medium
ENSG00000109654.14	TRIM2	23	chr4	153336363	153339320	+	APA	0.82547	0.94791	-0.12244	0.954	K1	0.7457	shortening	distal
ENSG00000110344.9	UBE4A	25	chr11	118399208	118399211	+	APA	0.038732	0.19372	-0.15499	0.954	K2	1.3943	shortening	distal
ENSG00000131732.11	ZCCHC9	18	chr5	81312615	81312662	+	APA	0.22584	0.44957	-0.22373	0.954	K3	1.9292	shortening	distal
ENSG00000103429.10	BFAR	16	chr16	14668069	14669236	+	APA	0.85724	0.9669	-0.10967	0.953	K1	0.7187	shortening	distal
ENSG00000168944.15	CEP120	30	chr5	123345003	123346399	-	APA	0.5858	0.73655	-0.15075	0.953	K1	0.9999	shortening	distal
ENSG00000113712.17	CSNK1A1	19	chr5	149496054	149496587	-	APA	0.32947	0.17482	0.15465	0.953	K2	1.4033	shortening	proximal
ENSG00000075539.14	FRYL	84	chr4	48497567	48498545	-	APA	0.23244	0.477	-0.24456	0.953	K2	1.5505	shortening	distal
ENSG00000137133.10	HINT2	14	chr9	35812960	35812973	-	APA	0.51228	0.8629	-0.35062	0.953	K1	0.9864	shortening	distal
ENSG00000118961.14	LDAH	16	chr2	20684014	20684411	-	APA	0.65416	0.88121	-0.22705	0.953	K1	0.994	shortening	distal
ENSG00000115902.10	SLC1A4	12	chr2	65023864	65023865	+	APA	0.12056	0.22196	-0.1014	0.953	K2	1.4652	shortening	distal
ENSG00000060688.12	SNRNP40	19	chr1	31259673	31259673	-	APA	0.097374	0.36812	-0.27074	0.953	K3	1.1237	shortening	distal
ENSG00000173334.3	TRIB1	7	chr8	125436929	125437191	+	APA	0.14478	0.25432	-0.10954	0.953	K2	1.114	shortening	distal
ENSG00000167468.16	GPX4	20	chr19	1106573	1106779	+	APA	0.83152	0.72343	0.1081	0.952	K2	0.891	shortening	proximal
ENSG00000127946.16	HIP1	39	chr7	75533300	75534087	-	APA	0.69711	0.9038	-0.20669	0.952	K2	0.9506	shortening	distal
ENSG00000189159.15	JPT1	10	chr17	75135307	75136250	-	APA	0.3083	0.055122	0.25318	0.952	K2	0.9995	shortening	proximal
ENSG00000112812.15	PRSS16	20	chr6	27255869	27256453	+	APA	0.84375	0.96888	-0.12513	0.952	K3	0.8651	shortening	distal
ENSG00000103197.16	TSC2	62	chr16	2088446	2088692	+	APA	0.25705	0.01462	0.24243	0.952	K3	1.0016	shortening	proximal
ENSG00000092931.11	MFSD11	28	chr17	76778573	76778727	+	APA	0.4631	0.64593	-0.18283	0.951	K2	1.4453	shortening	distal
ENSG00000131981.15	LGALS3	11	chr14	55145404	55145413	+	APA	0.83102	0.9488	-0.11778	0.95	K1	0.7419	shortening	distal
ENSG00000158006.13	PAFAH2	14	chr1	25959767	25960769	-	APA	0.69505	0.83314	-0.13809	0.95	K1	0.9171	shortening	distal
ENSG00000204764.13	RANBP17	51	chr5	171298762	171298858	+	APA	0.49631	0.11629	0.38002	0.95	K2	1.3252	shortening	proximal
ENSG00000070423.17	RNF126	18	chr19	647530	648131	-	APA	0.42976	0.080671	0.34909	0.95	K2	1.488	shortening	proximal
ENSG00000085982.13	USP40	46	chr2	233475526	233477391	-	APA	0.54304	0.72996	-0.18692	0.95	K2	1.0353	shortening	distal
ENSG00000136631.12	VPS45	36	chr1	150145289	150145327	+	APA	0.76968	0.92933	-0.15965	0.95	K2	1.0812	shortening	distal
ENSG00000175866.15	BAIAP2	40	chr17	81116049	81116224	+	APA	0.84468	0.97885	-0.13417	0.949	K2	0.9101	shortening	distal
ENSG00000248333.8	CDK11B	25	chr1	1635587	1635737	-	APA	0.57907	0.47005	0.10902	0.949	K2	1.535	shortening	proximal
ENSG00000140403.12	DNAJA4	17	chr15	78280685	78282192	+	APA	0.7129	0.81266	-0.09976	0.949	K2	1.3495	shortening	distal
ENSG00000168621.14	GDNF	8	chr5	37816026	37816135	-	APA	0.41948	0.044256	0.37522	0.949	K2	1.1871	shortening	proximal
ENSG00000206053.12	JPT2	13	chr16	1699267	1699269	+	APA	0.043438	0.17714	-0.13371	0.949	K3	1.8945	shortening	distal
ENSG00000163558.12	PRKCI	25	chr3	170303166	170305977	+	APA	0.23148	0.43751	-0.20603	0.949	K2	1.2718	shortening	distal
ENSG00000181045.14	SLC26A11	27	chr17	80252717	80253498	+	APA	0.48693	0.0095653	0.47736	0.949	K2	0.9966	shortening	proximal
ENSG00000166925.8	TSC22D4	11	chr7	100466523	100466537	-	APA	0.035333	0.15816	-0.12283	0.949	K2	0.7675	shortening	distal
ENSG00000129235.10	TXNDC17	17	chr17	6642951	6643067	+	APA	0.014146	0.11147	-0.097328	0.949	K3	0.8759	shortening	distal
ENSG00000151458.11	ANKRD50	5	chr4	124667359	124667514	-	APA	0.41694	0.30052	0.11641	0.948	K1	0.997	shortening	proximal
ENSG00000064195.7	DLX3	5	chr17	49990005	49991334	-	APA	0.80617	0.99087	-0.1847	0.948	K1	0.9806	shortening	distal
ENSG00000166289.5	PLEKHF1	7	chr19	29674844	29675457	+	APA	0.78458	0.97924	-0.19466	0.948	K2	0.9727	shortening	distal
ENSG00000107372.12	ZFAND5	12	chr9	72354458	72355954	-	APA	0.84741	0.96105	-0.11363	0.948	K1	0.673	shortening	distal
ENSG00000185022.11	MAFF	8	chr22	38214420	38214750	+	APA	0.024136	0.25111	-0.22697	0.947	K2	1.3792	shortening	distal
ENSG00000186184.16	POLR1D	16	chr13	27666261	27666262	+	APA	0.37961	0.51479	-0.13518	0.947	K3	1.5079	shortening	distal
ENSG00000165821.11	SALL2	17	chr14	21521537	21521621	-	APA	0.3199	0.13042	0.18948	0.947	K3	1.6444	shortening	proximal
ENSG00000196141.13	SPATS2L	28	chr2	200477883	200478209	+	APA	0.26722	0.16984	0.097378	0.947	K3	1.31	shortening	proximal
ENSG00000163659.12	TIPARP	12	chr3	156705121	156706750	+	APA	0.64307	0.82276	-0.17969	0.947	K2	1.1378	shortening	distal
ENSG00000103197.16	TSC2	63	chr16	2088693	2088700	+	APA	0.74342	0.98465	-0.24124	0.947	K3	1.0016	shortening	distal
ENSG00000147548.16	NSD3	36	chr8	38269697	38275022	-	APA	0.62178	0.79408	-0.1723	0.946	K2	1.3902	shortening	distal
ENSG00000171448.8	ZBTB26	3	chr9	122918100	122919944	-	APA	0.1824	0.082887	0.099514	0.946	K1	0.7231	shortening	proximal
ENSG00000197619.13	ZNF615	15	chr19	51991345	51992452	-	APA	0.53413	0.73592	-0.20179	0.946	K3	1.4863	shortening	distal
ENSG00000189159.15	JPT1	11	chr17	75135286	75135306	-	APA	0.69188	0.94473	-0.25285	0.945	K2	0.9995	shortening	distal
ENSG00000072401.14	UBE2D1	10	chr10	58368720	58369043	+	APA	0.40403	0.28736	0.11667	0.945	K2	1.2454	shortening	proximal
ENSG00000019582.14	CD74	17	chr5	150402152	150402250	-	APA	0.23528	0.014701	0.22058	0.944	K2	0.9983	shortening	proximal
ENSG00000134255.13	CEPT1	15	chr1	111185101	111185102	+	APA	0.018611	0.26843	-0.24982	0.944	K2	1.0499	shortening	distal
ENSG00000168090.9	COPS6	8	chr7	100089747	100090238	+	APA	0.66324	0.21542	0.44782	0.944	K1	0.9982	shortening	proximal
ENSG00000141551.14	CSNK1D	32	chr17	82244491	82244644	-	APA	0.14535	0.043795	0.10156	0.944	K3	2.4267	shortening	proximal
ENSG00000115866.10	DARS	26	chr2	135907244	135907259	-	APA	0.44407	0.31795	0.12612	0.944	K2	0.9975	shortening	proximal
ENSG00000106133.17	NSUN5P2	21	chr7	72947581	72948292	-	APA	0.86704	0.98491	-0.11788	0.944	K2	0.7476	shortening	distal
ENSG00000169228.13	RAB24	21	chr5	177301451	177301451	-	APA	0.023425	0.21206	-0.18863	0.944	K3	1.387	shortening	distal
ENSG00000166965.12	RCCD1	17	chr15	90962223	90962342	+	APA	0.36684	0.48065	-0.11381	0.944	K2	1.7734	shortening	distal
ENSG00000080503.22	SMARCA2	56	chr9	2193561	2193574	+	APA	0.31006	0.42638	-0.11633	0.944	K3	1.7963	shortening	distal
ENSG00000166925.8	TSC22D4	10	chr7	100466538	100467168	-	APA	0.96474	0.8419	0.12284	0.944	K2	0.7675	shortening	proximal
ENSG00000161021.12	MAML1	6	chr5	179773895	179773951	+	APA	0.6279	0.14916	0.47874	0.943	K1	0.9989	shortening	proximal
ENSG00000139323.13	POC1B	23	chr12	89419718	89420786	-	APA	0.31888	0.44185	-0.12297	0.943	K2	1.5659	shortening	distal
ENSG00000205220.11	PSMB10	17	chr16	67934502	67934505	-	APA	0.038696	0.16118	-0.12249	0.943	K1	0.8039	shortening	distal
ENSG00000139370.11	SLC15A4	15	chr12	128793895	128794172	-	APA	0.45651	0.34946	0.10705	0.943	K2	1.1605	shortening	proximal
ENSG00000055208.18	TAB2	12	chr6	149409618	149411382	+	APA	0.24055	0.06428	0.17627	0.943	K2	0.8718	shortening	proximal
ENSG00000149289.10	ZC3H12C	8	chr11	110164341	110165934	+	APA	0.18971	0.46794	-0.27823	0.943	K2	1.5707	shortening	distal
ENSG00000103429.10	BFAR	15	chr16	14667635	14668068	+	APA	0.14317	0.033258	0.10991	0.942	K1	0.7187	shortening	proximal
ENSG00000131943.17	C19orf12	15	chr19	29701163	29701688	-	APA	0.69695	0.83836	-0.14141	0.942	K3	1.3603	shortening	distal
ENSG00000132470.13	ITGB4	56	chr17	75757816	75757818	+	APA	0.0039341	0.49793	-0.494	0.942	K2	0.9819	shortening	distal
ENSG00000099917.17	MED15	32	chr22	20586568	20586867	+	APA	0.24605	0.089575	0.15647	0.942	K2	1.0727	shortening	proximal
ENSG00000164081.12	TEX264	16	chr3	51703724	51704018	+	APA	0.1822	0.29592	-0.11372	0.942	K2	1.2974	shortening	distal
ENSG00000170832.12	USP32	46	chr17	60179094	60179104	-	APA	0.38124	0.50617	-0.12493	0.942	K1	0.9991	shortening	distal
ENSG00000147996.16	CBWD5	44	chr9	65732242	65732393	+	APA	0.70555	0.92804	-0.22249	0.941	K1	0.9754	shortening	distal
ENSG00000157870.14	FAM213B	27	chr1	2589633	2589658	+	APA	0.30999	0.41557	-0.10558	0.941	K3	2.3107	shortening	distal
ENSG00000132470.13	ITGB4	55	chr17	75757605	75757815	+	APA	0.98482	0.47914	0.50567	0.941	K2	0.9819	shortening	proximal
ENSG00000099917.17	MED15	33	chr22	20586868	20587617	+	APA	0.72042	0.86986	-0.14944	0.941	K2	1.0727	shortening	distal
ENSG00000111325.16	OGFOD2	33	chr12	122979083	122979438	+	APA	0.51196	0.16092	0.35104	0.941	K3	2.1229	shortening	proximal
ENSG00000110075.14	PPP6R3	43	chr11	68614576	68614592	+	APA	0.61661	0.71558	-0.098971	0.941	K3	1.1295	shortening	distal
ENSG00000116497.17	S100PBP	19	chr1	32857855	32858879	+	APA	0.70859	0.81899	-0.1104	0.941	K2	0.9424	shortening	distal
ENSG00000127511.9	SIN3B	34	chr19	16880351	16880353	+	APA	0.052461	0.29878	-0.24631	0.941	K3	1.9515	shortening	distal
ENSG00000109654.14	TRIM2	22	chr4	153334814	153336362	+	APA	0.17334	0.051831	0.12151	0.941	K1	0.7457	shortening	proximal
ENSG00000163945.16	UVSSA	26	chr4	1386415	1388049	+	APA	0.47615	0.66336	-0.1872	0.941	K3	0.9997	shortening	distal
ENSG00000151458.11	ANKRD50	6	chr4	124664052	124667358	-	APA	0.58334	0.69931	-0.11597	0.94	K1	0.997	shortening	distal
ENSG00000184867.13	ARMCX2	23	chrX	101657087	101657092	-	APA	0.14426	0.015178	0.12908	0.94	K3	1.4385	shortening	proximal
ENSG00000235919.4	ASH1L-AS1	5	chr1	155563647	155563944	+	APA	0.71285	0.92389	-0.21103	0.94	K1	0.9982	shortening	distal
ENSG00000159208.15	CIART	14	chr1	150286738	150286776	+	APA	0.53266	0.37815	0.1545	0.94	K2	0.9997	shortening	proximal
ENSG00000105443.14	CYTH2	25	chr19	48479123	48480653	+	APA	0.28976	0.39342	-0.10366	0.94	K2	1.5578	shortening	distal
ENSG00000150760.12	DOCK1	55	chr10	127451466	127452517	+	APA	0.42583	0.78023	-0.35441	0.94	K1	0.9992	shortening	distal
ENSG00000105926.15	MPP6	17	chr7	24689541	24694193	+	APA	0.29981	0.4104	-0.11059	0.94	K1	0.9922	shortening	distal
ENSG00000196531.10	NACA	32	chr12	56712435	56712439	-	APA	0.031176	0.1377	-0.10653	0.94	K2	1.4224	shortening	distal
ENSG00000168785.7	TSPAN5	13	chr4	98472210	98472344	-	APA	0.28526	0.10806	0.1772	0.94	K2	0.9406	shortening	proximal
ENSG00000131732.11	ZCCHC9	17	chr5	81312544	81312614	+	APA	0.48463	0.12493	0.3597	0.94	K3	1.9292	shortening	proximal
ENSG00000107372.12	ZFAND5	11	chr9	72355955	72356101	-	APA	0.15221	0.039067	0.11315	0.94	K1	0.673	shortening	proximal
ENSG00000151388.10	ADAMTS12	27	chr5	33527181	33527366	-	APA	0.44058	0.030673	0.4099	0.939	K1	0.9901	shortening	proximal
ENSG00000119559.15	C19orf25	14	chr19	1474172	1474173	-	APA	0.17605	0.6022	-0.42614	0.939	K3	1.5077	shortening	distal
ENSG00000168785.7	TSPAN5	14	chr4	98470367	98472209	-	APA	0.7157	0.8916	-0.1759	0.939	K2	0.9406	shortening	distal
ENSG00000214135.8	AC132008.2	17	chr3	197614286	197614622	-	APA	0.14824	0.018165	0.13008	0.938	K1	0.853	shortening	proximal
ENSG00000126453.9	BCL2L12	17	chr19	49673860	49673915	+	APA	0.45234	0.61885	-0.16651	0.938	K2	0.9989	shortening	distal
ENSG00000105173.13	CCNE1	17	chr19	29824281	29824308	+	APA	0.11729	0.54944	-0.43215	0.938	K2	1.5514	shortening	distal
ENSG00000179335.18	CLK3	34	chr15	74629707	74630116	+	APA	0.17501	0.77602	-0.60102	0.938	K3	1.1914	shortening	distal
ENSG00000168090.9	COPS6	9	chr7	100090239	100090362	+	APA	0.33121	0.78389	-0.45268	0.938	K1	0.9982	shortening	distal
ENSG00000138413.13	IDH1	22	chr2	208236232	208236264	-	APA	0.32686	0.4762	-0.14934	0.938	K2	1.4653	shortening	distal
ENSG00000102882.11	MAPK3	20	chr16	30114616	30114708	-	APA	0.45415	0.18642	0.26773	0.938	K3	1.922	shortening	proximal
ENSG00000204764.13	RANBP17	53	chr5	171299178	171300015	+	APA	0.065661	0.18804	-0.12237	0.938	K2	1.3252	shortening	distal
ENSG00000007402.11	CACNA2D2	44	chr3	50362802	50362891	-	APA	0.47022	0.94062	-0.4704	0.937	K2	0.9895	shortening	distal
ENSG00000179583.18	CIITA	30	chr16	10923878	10923992	+	APA	0.29925	0.0059472	0.2933	0.937	K3	0.923	shortening	proximal
ENSG00000150760.12	DOCK1	54	chr10	127451332	127451465	+	APA	0.57476	0.21941	0.35534	0.937	K1	0.9992	shortening	proximal
ENSG00000221909.2	FAM200A	3	chr7	99546801	99548506	-	APA	0.45073	0.21819	0.23255	0.937	K1	0.9893	shortening	proximal
ENSG00000115159.15	GPD2	26	chr2	156583049	156583058	+	APA	0.23619	0.063979	0.17221	0.937	K3	1.2605	shortening	proximal
ENSG00000176842.14	IRX5	11	chr16	54934070	54934485	+	APA	0.38487	0.50874	-0.12388	0.937	K2	0.9982	shortening	distal
ENSG00000161021.12	MAML1	7	chr5	179773952	179777286	+	APA	0.37176	0.85059	-0.47883	0.937	K1	0.9989	shortening	distal
ENSG00000267278.5	MAP3K14-AS1	11	chr17	45268264	45268471	+	APA	0.16661	0.40683	-0.24021	0.937	K2	1.4213	shortening	distal
ENSG00000083720.12	OXCT1	23	chr5	41731581	41731738	-	APA	0.22198	0.4593	-0.23732	0.937	K3	1.6974	shortening	distal
ENSG00000072401.14	UBE2D1	11	chr10	58369044	58369595	+	APA	0.55679	0.66191	-0.10512	0.937	K2	1.2454	shortening	distal
ENSG00000121989.14	ACVR2A	19	chr2	147927505	147927929	+	APA	0.43558	0.69828	-0.2627	0.936	K2	1.8129	shortening	distal
ENSG00000019582.14	CD74	19	chr5	150401670	150401698	-	APA	0.76548	0.98516	-0.21969	0.936	K2	0.9983	shortening	distal
ENSG00000152404.15	CWF19L2	22	chr11	107326360	107326796	-	APA	0.66717	0.90237	-0.2352	0.936	K2	0.9988	shortening	distal
ENSG00000112584.13	FAM120B	18	chr6	170405349	170405642	+	APA	0.029766	0.1462	-0.11644	0.936	K3	1.6181	shortening	distal
ENSG00000176842.14	IRX5	10	chr16	54933961	54934069	+	APA	0.61416	0.49037	0.12379	0.936	K2	0.9982	shortening	proximal
ENSG00000138030.12	KHK	13	chr2	27100752	27100772	+	APA	0.14458	0.47515	-0.33058	0.936	K2	0.9718	shortening	distal
ENSG00000007047.14	MARK4	27	chr19	45303370	45303693	+	APA	0.74135	0.90748	-0.16613	0.936	K2	0.9805	shortening	distal
ENSG00000132563.15	REEP2	20	chr5	138445724	138445798	+	APA	0.026061	0.36032	-0.33426	0.936	K3	1.3388	shortening	distal
ENSG00000181031.15	RPH3AL	15	chr17	212502	213323	-	APA	0.56856	0.75938	-0.19082	0.936	K2	1.384	shortening	distal
ENSG00000109445.10	ZNF330	13	chr4	141234097	141234697	+	APA	0.56458	0.68962	-0.12505	0.936	K1	0.9977	shortening	distal
ENSG00000064195.7	DLX3	4	chr17	49991335	49991864	-	APA	0.19382	0.0090212	0.1848	0.935	K1	0.9806	shortening	proximal
ENSG00000023909.9	GCLM	9	chr1	93885205	93887033	-	APA	0.44028	0.54711	-0.10683	0.935	K1	0.9998	shortening	distal
ENSG00000008838.19	MED24	48	chr17	40019173	40019292	-	APA	0.18504	0.043613	0.14143	0.935	K3	1.3935	shortening	proximal
ENSG00000113068.9	PFDN1	13	chr5	140245087	140245124	-	APA	0.64869	0.82109	-0.1724	0.935	K3	1.5033	shortening	distal
ENSG00000171448.8	ZBTB26	4	chr9	122915566	122918099	-	APA	0.81698	0.91648	-0.099505	0.935	K1	0.7231	shortening	distal
ENSG00000221909.2	FAM200A	4	chr7	99546308	99546800	-	APA	0.55091	0.78145	-0.23054	0.934	K1	0.9893	shortening	distal
ENSG00000089639.10	GMIP	25	chr19	19629843	19630336	-	APA	0.12557	0.027707	0.097867	0.934	K1	0.6937	shortening	proximal
ENSG00000089639.10	GMIP	26	chr19	19629476	19629842	-	APA	0.87386	0.97237	-0.098512	0.934	K1	0.6937	shortening	distal
ENSG00000072736.18	NFATC3	26	chr16	68226350	68226471	+	APA	0.45016	0.56667	-0.11651	0.934	K2	1.7032	shortening	distal
ENSG00000171033.12	PKIA	6	chr8	78601742	78602098	+	APA	0.010628	0.11002	-0.099388	0.934	K2	1.4715	shortening	distal
ENSG00000157778.8	PSMG3	4	chr7	1567351	1567850	-	APA	0.7623	0.50752	0.25478	0.934	K1	0.9874	shortening	proximal
ENSG00000168944.15	CEP120	29	chr5	123346400	123346753	-	APA	0.41543	0.26254	0.15289	0.933	K1	0.9999	shortening	proximal
ENSG00000159208.15	CIART	15	chr1	150286777	150287093	+	APA	0.46646	0.61908	-0.15261	0.933	K2	0.9997	shortening	distal
ENSG00000272414.5	FAM47E-STBD1	13	chr4	76310045	76310379	+	APA	0.035212	0.21071	-0.1755	0.933	K2	1.5026	shortening	distal
ENSG00000023909.9	GCLM	8	chr1	93887034	93889159	-	APA	0.55814	0.45299	0.10516	0.933	K1	0.9998	shortening	proximal
ENSG00000173638.18	SLC19A1	15	chr21	45514715	45514895	-	APA	0.74565	0.63278	0.11287	0.933	K1	0.9623	shortening	proximal
ENSG00000196792.11	STRN3	17	chr14	30895345	30895580	-	APA	0.32675	0.19399	0.13276	0.933	K1	0.9834	shortening	proximal
ENSG00000163945.16	UVSSA	25	chr4	1386413	1386414	+	APA	0.52364	0.14559	0.37805	0.933	K3	0.9997	shortening	medium
ENSG00000154265.15	ABCA5	53	chr17	69247376	69247644	-	APA	0.47705	0.76392	-0.28687	0.932	K3	1.5282	shortening	distal
ENSG00000158985.13	CDC42SE2	11	chr5	131393107	131394667	+	APA	0.96773	0.85218	0.11555	0.932	K2	0.8109	shortening	proximal
ENSG00000005100.12	DHX33	18	chr17	5443489	5443492	-	APA	0.036155	0.19207	-0.15591	0.932	K2	1.0649	shortening	distal
ENSG00000175376.8	EIF1AD	13	chr11	65998433	65998743	-	APA	0.44182	0.31764	0.12418	0.932	K1	0.9945	shortening	proximal
ENSG00000160796.16	NBEAL2	69	chr3	47009557	47009703	+	APA	0.31169	0.53357	-0.22188	0.932	K2	1.5453	shortening	distal
ENSG00000127980.15	PEX1	39	chr7	92487290	92487296	-	APA	0.16395	0.29546	-0.13151	0.932	K3	1.1771	shortening	distal
ENSG00000173638.18	SLC19A1	16	chr21	45513776	45514714	-	APA	0.25492	0.36803	-0.11311	0.932	K1	0.9623	shortening	distal
ENSG00000125755.18	SYMPK	30	chr19	45818913	45818954	-	APA	0.18779	0.74766	-0.55987	0.932	K1	0.9963	shortening	distal
ENSG00000179152.19	TCAIM	25	chr3	44408875	44409451	+	APA	0.64154	0.79722	-0.15567	0.932	K2	1.3382	shortening	distal
ENSG00000110108.9	TMEM109	6	chr11	60923377	60923443	+	APA	0.72354	0.86914	-0.14559	0.932	K1	0.9476	shortening	distal
ENSG00000197647.11	ZNF433	11	chr19	12014758	12016236	-	APA	0.40915	0.83892	-0.42977	0.932	K2	1.8795	shortening	distal
ENSG00000151388.10	ADAMTS12	28	chr5	33523535	33527180	-	APA	0.5594	0.97093	-0.41153	0.931	K1	0.9901	shortening	distal
ENSG00000152404.15	CWF19L2	21	chr11	107326797	107327053	-	APA	0.3297	0.097745	0.23196	0.931	K2	0.9988	shortening	proximal
ENSG00000169718.17	DUS1L	32	chr17	82057872	82057879	-	APA	0.1381	0.30333	-0.16523	0.931	K3	1.0639	shortening	distal
ENSG00000100890.15	KIAA0391	21	chr14	35274066	35277614	+	APA	0.35949	0.53643	-0.17694	0.931	K2	1.7538	shortening	distal
ENSG00000131051.22	RBM39	51	chr20	35704377	35704399	-	APA	0.267	0.39638	-0.12938	0.931	K3	1.8179	shortening	distal
ENSG00000100359.20	SGSM3	36	chr22	40409682	40409811	+	APA	0.0121	0.15037	-0.13827	0.931	K2	1.1325	shortening	distal
ENSG00000125755.18	SYMPK	29	chr19	45818955	45821383	-	APA	0.81251	0.25297	0.55954	0.931	K1	0.9963	shortening	proximal
ENSG00000055208.18	TAB2	13	chr6	149411383	149411516	+	APA	0.75997	0.93577	-0.1758	0.931	K2	0.8718	shortening	distal
ENSG00000126453.9	BCL2L12	16	chr19	49673698	49673859	+	APA	0.54779	0.37947	0.16832	0.93	K2	0.9989	shortening	proximal
ENSG00000179583.18	CIITA	34	chr16	10924984	10932281	+	APA	0.69954	0.99403	-0.29449	0.93	K3	0.923	shortening	distal
ENSG00000068885.14	IFT80	34	chr3	160258185	160258402	-	APA	0.12166	0.32434	-0.20268	0.93	K3	1.5941	shortening	distal
ENSG00000102786.14	INTS6	30	chr13	51365503	51365845	-	APA	0.45516	0.27954	0.17562	0.93	K3	1.863	shortening	proximal
ENSG00000008382.15	MPND	19	chr19	4360069	4360081	+	APA	0.96329	0.57718	0.38611	0.93	K2	0.9924	shortening	proximal
ENSG00000125844.15	RRBP1	39	chr20	17613678	17614127	-	APA	0.32182	0.45514	-0.13333	0.93	K1	0.9996	shortening	distal
ENSG00000183207.13	RUVBL2	25	chr19	49015927	49015929	+	APA	0.68213	0.92495	-0.24282	0.93	K2	1.1384	shortening	distal
ENSG00000117500.12	TMED5	10	chr1	93151858	93154195	-	APA	0.49279	0.59408	-0.10129	0.93	K2	1.207	shortening	distal
ENSG00000112584.13	FAM120B	16	chr6	170405077	170405078	+	APA	0.55188	0.21783	0.33405	0.929	K3	1.6181	shortening	proximal
ENSG00000008382.15	MPND	20	chr19	4360082	4360086	+	APA	0.037061	0.4202	-0.38314	0.929	K2	0.9924	shortening	distal
ENSG00000196517.11	SLC6A9	19	chr1	43997528	43997739	-	APA	0.46063	0.13531	0.32532	0.929	K1	0.9994	shortening	proximal
ENSG00000147526.19	TACC1	43	chr8	38848522	38850775	+	APA	0.044236	0.14653	-0.1023	0.929	K3	1.4136	shortening	distal
ENSG00000104517.12	UBR5	63	chr8	102253946	102254514	-	APA	0.32807	0.20626	0.12181	0.929	K2	1.5799	shortening	proximal
ENSG00000075539.14	FRYL	83	chr4	48498546	48499253	-	APA	0.45214	0.31453	0.13761	0.928	K2	1.5505	shortening	proximal
ENSG00000172728.15	FUT10	13	chr8	33372264	33372804	-	APA	0.18017	0.4307	-0.25053	0.928	K2	1.5662	shortening	distal
ENSG00000169660.15	HEXDC	25	chr17	82442593	82442645	+	APA	0.018493	0.13293	-0.11444	0.928	K2	0.8236	shortening	distal
ENSG00000184903.9	IMMP2L	15	chr7	110663051	110663053	-	APA	0.051194	0.39527	-0.34408	0.928	K2	1.4952	shortening	distal
ENSG00000180089.5	TMEM86B	7	chr19	55226751	55227563	-	APA	0.036057	0.43838	-0.40232	0.928	K2	0.9866	shortening	distal
ENSG00000105750.14	ZNF85	11	chr19	20942801	20943726	+	APA	0.81919	0.46699	0.3522	0.928	K1	0.9391	shortening	proximal
ENSG00000134709.10	HOOK1	30	chr1	59873008	59876378	+	APA	0.49071	0.65014	-0.15943	0.927	K2	1.2057	shortening	distal
ENSG00000134283.17	PPHLN1	29	chr12	42441544	42441950	+	APA	0.26191	0.45331	-0.19141	0.927	K2	1.3481	shortening	distal
ENSG00000125844.15	RRBP1	38	chr20	17614128	17614220	-	APA	0.67843	0.54437	0.13406	0.927	K1	0.9996	shortening	proximal
ENSG00000144736.13	SHQ1	15	chr3	72749959	72750836	-	APA	0.19586	0.33741	-0.14155	0.927	K2	1.2837	shortening	distal
ENSG00000178307.9	TMEM11	8	chr17	21197958	21198255	-	APA	0.7277	0.91014	-0.18244	0.927	K2	1.064	shortening	distal
ENSG00000138413.13	IDH1	21	chr2	208236265	208236741	-	APA	0.58564	0.28364	0.302	0.926	K2	1.4653	shortening	medium
ENSG00000249346.6	LINC01016	8	chr6	33889511	33891701	-	APA	0.46325	0.61825	-0.155	0.926	K2	1.4976	shortening	distal
ENSG00000205220.11	PSMB10	16	chr16	67934506	67934671	-	APA	0.96102	0.83904	0.12198	0.926	K1	0.8039	shortening	proximal
ENSG00000171044.10	XKR6	7	chr8	10896045	10896522	-	APA	0.35842	0.7884	-0.42997	0.926	K1	0.9998	shortening	distal
ENSG00000141428.16	C18orf21	13	chr18	35978940	35979278	+	APA	0.23796	0.12319	0.11477	0.925	K2	0.9017	shortening	proximal
ENSG00000198265.11	HELZ	38	chr17	67077972	67078586	-	APA	0.59365	0.33204	0.26161	0.925	K2	1.4077	shortening	proximal
ENSG00000144485.10	HES6	16	chr2	238238276	238238604	-	APA	0.079548	0.34447	-0.26492	0.925	K3	1.7215	shortening	distal
ENSG00000138413.13	IDH1	20	chr2	208236742	208237169	-	APA	0.087371	0.24065	-0.15328	0.925	K2	1.4653	shortening	proximal
ENSG00000163913.11	IFT122	52	chr3	129520346	129520347	+	APA	0.013575	0.24866	-0.23509	0.925	K3	2.156	shortening	distal
ENSG00000196517.11	SLC6A9	20	chr1	43997443	43997527	-	APA	0.53886	0.86402	-0.32516	0.925	K1	0.9994	shortening	distal
ENSG00000167723.14	TRPV3	31	chr17	3510502	3513189	-	APA	0.31076	0.68927	-0.37851	0.925	K2	1.4431	shortening	distal
ENSG00000163633.10	C4orf36	21	chr4	86886472	86886796	-	APA	0.075748	0.27523	-0.19948	0.924	K1	0.9402	shortening	distal
ENSG00000171316.11	CHD7	18	chr8	60865460	60866474	+	APA	0.39406	0.63161	-0.23754	0.924	K2	1.1985	shortening	distal
ENSG00000103423.13	DNAJA3	20	chr16	4456773	4456775	+	APA	0.016133	0.17127	-0.15514	0.924	K2	1.5573	shortening	distal
ENSG00000175376.8	EIF1AD	14	chr11	65996545	65998432	-	APA	0.55796	0.68257	-0.12461	0.924	K1	0.9945	shortening	distal
ENSG00000102786.14	INTS6	33	chr13	51365199	51365226	-	APA	0.039477	0.23784	-0.19836	0.924	K3	1.863	shortening	distal
ENSG00000111325.16	OGFOD2	34	chr12	122979439	122979533	+	APA	0.24288	0.57118	-0.32829	0.924	K3	2.1229	shortening	distal
ENSG00000100023.18	PPIL2	39	chr22	21696885	21697866	+	APA	0.8352	0.66212	0.17307	0.924	K3	1.5225	shortening	proximal
ENSG00000162032.15	SPSB3	21	chr16	1776749	1776794	-	APA	0.0062203	0.38113	-0.37491	0.924	K3	1.2348	shortening	distal
ENSG00000130559.18	CAMSAP1	22	chr9	135810423	135810680	-	APA	0.38162	0.28073	0.10089	0.923	K1	0.988	shortening	proximal
ENSG00000253293.4	HOXA10	3	chr7	27171220	27172173	-	APA	0.29639	0.13946	0.15693	0.923	K1	0.9328	shortening	proximal
ENSG00000025423.11	HSD17B6	10	chr12	56787346	56787790	+	APA	0.70116	0.95578	-0.25463	0.923	K1	0.993	shortening	distal
ENSG00000065989.15	PDE4A	25	chr19	10467622	10467649	+	APA	0.16033	0.36694	-0.20662	0.923	K3	1.7149	shortening	distal
ENSG00000106144.19	CASP2	21	chr7	143304940	143305071	+	APA	0.22217	0.067783	0.15439	0.922	K3	2.1102	shortening	proximal
ENSG00000122203.14	KIAA1191	22	chr5	176347494	176347808	-	APA	0.17331	0.058692	0.11462	0.922	K2	1.4396	shortening	proximal
ENSG00000170873.18	MTSS1	33	chr8	124552800	124552812	-	APA	0.33842	0.18453	0.15389	0.922	K3	1.7372	shortening	proximal
ENSG00000145912.8	NHP2	12	chr5	178149460	178149481	-	APA	0.83493	0.95194	-0.11701	0.922	K1	0.7678	shortening	distal
ENSG00000157778.8	PSMG3	5	chr7	1567330	1567350	-	APA	0.23716	0.4929	-0.25574	0.922	K1	0.9874	shortening	distal
ENSG00000132677.12	RHBG	18	chr1	156385149	156385213	+	APA	0.79356	0.95489	-0.16133	0.922	K2	0.8937	shortening	distal
ENSG00000105750.14	ZNF85	12	chr19	20943727	20943977	+	APA	0.18148	0.535	-0.35353	0.922	K1	0.9391	shortening	distal
ENSG00000265778.2	AC018413.1	3	chr18	76492757	76492889	+	APA	0.58493	0.30778	0.27715	0.921	K1	0.98	shortening	proximal
ENSG00000265778.2	AC018413.1	4	chr18	76492890	76493918	+	APA	0.41938	0.69517	-0.27579	0.921	K1	0.98	shortening	distal
ENSG00000165233.17	CARD19	10	chr9	93110722	93111187	+	APA	0.072591	0.61053	-0.53793	0.921	K1	0.794	shortening	distal
ENSG00000169756.16	LIMS1	24	chr2	108684449	108687238	+	APA	0.71812	0.36872	0.3494	0.921	K2	1.9419	shortening	proximal
ENSG00000184588.17	PDE4B	21	chr1	66372313	66372738	+	APA	0.29878	0.037028	0.26175	0.921	K3	1.7433	shortening	proximal
ENSG00000213445.9	SIPA1	26	chr11	65650588	65650880	+	APA	0.50947	0.080488	0.42898	0.921	K2	0.9992	shortening	proximal
ENSG00000145348.16	TBCK	33	chr4	106046570	106046680	-	APA	0.31539	0.046519	0.26887	0.921	K3	1	shortening	proximal
ENSG00000214135.8	AC132008.2	18	chr3	197614027	197614285	-	APA	0.85093	0.98171	-0.13078	0.92	K1	0.853	shortening	distal
ENSG00000122970.15	IFT81	27	chr12	110218044	110218560	+	APA	0.84977	0.63684	0.21292	0.92	K2	0.9949	shortening	proximal
ENSG00000158186.12	MRAS	14	chr3	138403132	138403186	+	APA	0.052729	0.36208	-0.30935	0.92	K3	1.4905	shortening	distal
ENSG00000101346.13	POFUT1	10	chr20	32234473	32234568	+	APA	0.61218	0.38214	0.23003	0.92	K1	0.9986	shortening	proximal
ENSG00000081019.13	RSBN1	16	chr1	113765848	113766144	-	APA	0.13857	0.26886	-0.13029	0.92	K3	2.5064	shortening	distal
ENSG00000182141.10	ZNF708	7	chr19	21294396	21294739	-	APA	0.22581	0.096831	0.12898	0.92	K2	1.49	shortening	proximal
ENSG00000182141.10	ZNF708	8	chr19	21292604	21294395	-	APA	0.23005	0.37112	-0.14107	0.92	K2	1.49	shortening	distal
ENSG00000112309.10	B3GAT2	6	chr6	70857213	70861749	-	APA	0.44655	0.16556	0.281	0.919	K1	0.9984	shortening	proximal
ENSG00000163633.10	C4orf36	20	chr4	86886797	86887757	-	APA	0.92274	0.72558	0.19715	0.919	K1	0.9402	shortening	proximal
ENSG00000114737.15	CISH	9	chr3	50606496	50606521	-	APA	0.075868	0.25734	-0.18147	0.919	K2	0.9129	shortening	distal
ENSG00000145912.8	NHP2	11	chr5	178149482	178149838	-	APA	0.16468	0.04803	0.11665	0.919	K1	0.7678	shortening	proximal
ENSG00000142949.16	PTPRF	49	chr1	43621935	43622357	+	APA	0.18386	0.087766	0.096095	0.919	K3	1.5313	shortening	proximal
ENSG00000117500.12	TMED5	9	chr1	93154196	93154888	-	APA	0.47257	0.36307	0.1095	0.919	K2	1.207	shortening	proximal
ENSG00000170417.15	TMEM182	10	chr2	102814748	102815104	+	APA	0.36704	0.15421	0.21282	0.919	K3	2.0894	shortening	proximal
ENSG00000164291.16	ARSK	17	chr5	95603681	95605064	+	APA	0.46338	0.63415	-0.17076	0.918	K1	0.9936	shortening	distal
ENSG00000089486.16	CDIP1	17	chr16	4510675	4510738	-	APA	0.16669	0.4815	-0.31481	0.918	K3	1.5683	shortening	distal
ENSG00000056998.19	GYG2	19	chrX	2881092	2881440	+	APA	0.13358	0.021039	0.11254	0.918	K3	1.6068	shortening	proximal
ENSG00000138796.16	HADH	22	chr4	108035106	108035151	+	APA	0.1383	0.27123	-0.13293	0.918	K3	1.7136	shortening	medium
ENSG00000138796.16	HADH	21	chr4	108034862	108035105	+	APA	0.70334	0.56513	0.13821	0.918	K3	1.7136	shortening	proximal
ENSG00000196531.10	NACA	31	chr12	56712440	56712503	-	APA	0.53096	0.31558	0.21538	0.918	K2	1.4224	shortening	proximal
ENSG00000197563.10	PIGN	39	chr18	62044549	62045341	-	APA	0.22192	0.38859	-0.16667	0.918	K2	1.194	shortening	distal
ENSG00000146083.11	RNF44	22	chr5	176526697	176528938	-	APA	0.42917	0.53149	-0.10232	0.918	K2	1.4693	shortening	distal
ENSG00000110108.9	TMEM109	5	chr11	60921774	60923376	+	APA	0.27637	0.13071	0.14567	0.918	K1	0.9476	shortening	proximal
ENSG00000172661.17	WASHC2C	35	chr10	45792261	45792601	+	APA	0.018647	0.14277	-0.12412	0.918	K2	1.5588	shortening	distal
ENSG00000109445.10	ZNF330	12	chr4	141233715	141234096	+	APA	0.43459	0.31079	0.1238	0.918	K1	0.9977	shortening	proximal
ENSG00000237732.9	AC010980.1	9	chr2	222321513	222321659	+	APA	0.96156	0.86442	0.097138	0.917	K2	0.6964	shortening	proximal
ENSG00000253293.4	HOXA10	4	chr7	27170591	27171219	-	APA	0.70454	0.85982	-0.15528	0.917	K1	0.9328	shortening	distal
ENSG00000003096.14	KLHL13	16	chrX	117898572	117899395	-	APA	0.030537	0.20966	-0.17912	0.917	K2	1.4755	shortening	distal
ENSG00000143815.14	LBR	15	chr1	225403090	225403463	-	APA	0.25849	0.084007	0.17448	0.917	K1	0.9228	shortening	proximal
ENSG00000143815.14	LBR	16	chr1	225401502	225403089	-	APA	0.7412	0.91573	-0.17454	0.917	K1	0.9228	shortening	distal
ENSG00000138430.15	OLA1	16	chr2	174075190	174075527	-	APA	0.064602	0.2008	-0.1362	0.917	K2	1.3957	shortening	medium
ENSG00000072958.8	AP1M1	20	chr19	16234785	16235345	+	APA	0.70183	0.83473	-0.1329	0.916	K2	0.9434	shortening	distal
ENSG00000112309.10	B3GAT2	7	chr6	70856679	70857212	-	APA	0.55296	0.83434	-0.28138	0.916	K1	0.9984	shortening	distal
ENSG00000159348.12	CYB5R1	17	chr1	202961876	202962549	-	APA	0.55332	0.84136	-0.28804	0.916	K2	1.5745	shortening	distal
ENSG00000068878.14	PSME4	52	chr2	53864870	53865573	-	APA	0.82085	0.56967	0.25118	0.916	K2	1.3616	shortening	proximal
ENSG00000213445.9	SIPA1	27	chr11	65650881	65650918	+	APA	0.492	0.91988	-0.42787	0.916	K2	0.9992	shortening	distal
ENSG00000140455.16	USP3	29	chr15	63591445	63591467	+	APA	0.27871	0.44928	-0.17058	0.916	K3	2.1683	shortening	distal
ENSG00000234996.4	AC098934.2	4	chr1	202873294	202874326	+	APA	0.64002	0.42828	0.21173	0.915	K1	0.9884	shortening	proximal
ENSG00000114737.15	CISH	8	chr3	50606522	50608142	-	APA	0.92435	0.74181	0.18254	0.915	K2	0.9129	shortening	proximal
ENSG00000122641.10	INHBA	7	chr7	41685114	41689515	-	APA	0.64397	0.78216	-0.1382	0.915	K2	0.9995	shortening	distal
ENSG00000107902.13	LHPP	16	chr10	124613426	124614141	+	APA	0.34842	0.56166	-0.21324	0.915	K2	1.4261	shortening	distal
ENSG00000105926.15	MPP6	16	chr7	24687438	24689540	+	APA	0.69837	0.58972	0.10865	0.915	K1	0.9922	shortening	proximal
ENSG00000025423.11	HSD17B6	9	chr12	56787125	56787345	+	APA	0.29941	0.043813	0.25559	0.914	K1	0.993	shortening	proximal
ENSG00000122970.15	IFT81	28	chr12	110218561	110218775	+	APA	0.14932	0.36397	-0.21465	0.914	K2	0.9949	shortening	distal
ENSG00000125686.11	MED1	22	chr17	39407714	39410580	-	APA	0.13204	0.036764	0.095271	0.914	K1	0.7365	shortening	proximal
ENSG00000183648.9	NDUFB1	8	chr14	92116126	92116229	-	APA	0.79043	0.9395	-0.14907	0.914	K2	1.108	shortening	distal
ENSG00000159086.14	PAXBP1	30	chr21	32733900	32734819	-	APA	0.46261	0.65854	-0.19592	0.914	K2	1.7526	shortening	distal
ENSG00000115902.10	SLC1A4	10	chr2	65020912	65021394	+	APA	0.46937	0.21014	0.25923	0.914	K2	1.4652	shortening	proximal
ENSG00000196187.11	TMEM63A	30	chr1	225859663	225860723	-	APA	0.47456	0.78289	-0.30833	0.914	K1	0.9952	shortening	distal
ENSG00000150764.13	DIXDC1	27	chr11	112021056	112021979	+	APA	0.07732	0.20549	-0.12817	0.913	K2	1.7559	shortening	distal
ENSG00000103356.15	EARS2	26	chr16	23522017	23522623	-	APA	0.55126	0.16036	0.3909	0.913	K3	1.5766	shortening	proximal
ENSG00000138798.11	EGF	28	chr4	110011502	110011689	+	APA	0.2392	0.037368	0.20184	0.913	K2	1.5668	shortening	medium
ENSG00000129521.13	EGLN3	10	chr14	33925399	33925510	-	APA	0.59957	0.72344	-0.12387	0.913	K2	1.372	shortening	distal
ENSG00000137942.16	FNBP1L	20	chr1	93552580	93554659	+	APA	0.61155	0.73572	-0.12416	0.913	K1	0.9906	shortening	distal
ENSG00000112339.14	HBS1L	26	chr6	134965149	134965290	-	APA	0.14864	0.31762	-0.16898	0.913	K3	1.5478	shortening	distal
ENSG00000129535.12	NRL	11	chr14	24080877	24080999	-	APA	0.2037	0.49672	-0.29302	0.913	K3	1.5727	shortening	distal
ENSG00000127980.15	PEX1	37	chr7	92487457	92487541	-	APA	0.76926	0.65807	0.11118	0.913	K3	1.1771	shortening	proximal
ENSG00000127511.9	SIN3B	33	chr19	16879061	16880350	+	APA	0.6574	0.34857	0.30883	0.913	K3	1.9515	shortening	proximal
ENSG00000182173.12	TSEN54	16	chr17	75524421	75524733	+	APA	0.071463	0.21935	-0.14789	0.913	K2	0.8679	shortening	distal
ENSG00000068724.15	TTC7A	33	chr2	47073924	47074048	+	APA	0.049734	0.22279	-0.17306	0.913	K3	1.8963	shortening	distal
ENSG00000173175.14	ADCY5	28	chr3	123283944	123284445	-	APA	0.46864	0.6752	-0.20656	0.912	K2	1.7422	shortening	distal
ENSG00000155621.14	C9orf85	5	chr9	71972692	71973152	+	APA	0.029763	0.14244	-0.11268	0.912	K1	0.7407	shortening	distal
ENSG00000103995.13	CEP152	41	chr15	48738151	48739288	-	APA	0.61111	0.44133	0.16978	0.912	K1	0.9999	shortening	proximal
ENSG00000134255.13	CEPT1	14	chr1	111184809	111185100	+	APA	0.36791	0.11004	0.25788	0.912	K2	1.0499	shortening	proximal
ENSG00000105472.12	CLEC11A	9	chr19	50725316	50725469	+	APA	0.044355	0.26502	-0.22067	0.912	K2	1.0371	shortening	distal
ENSG00000196739.14	COL27A1	69	chr9	114310549	114311528	+	APA	0.10268	0.34643	-0.24375	0.912	K2	0.989	shortening	distal
ENSG00000272333.5	KMT2B	48	chr19	35738497	35738878	+	APA	0.78439	0.88345	-0.099057	0.912	K1	0.8355	shortening	distal
ENSG00000133961.19	NUMB	32	chr14	73275218	73275672	-	APA	0.13273	0.23194	-0.099204	0.912	K3	1.6888	shortening	distal
ENSG00000136143.14	SUCLA2	15	chr13	47943361	47943445	-	APA	0.66177	0.54174	0.12003	0.912	K1	0.9998	shortening	proximal
ENSG00000145348.16	TBCK	34	chr4	106046095	106046569	-	APA	0.68537	0.95377	-0.2684	0.912	K3	1	shortening	distal
ENSG00000196187.11	TMEM63A	29	chr1	225860724	225860859	-	APA	0.52255	0.21722	0.30533	0.912	K1	0.9952	shortening	proximal
ENSG00000109790.16	KLHL5	18	chr4	39122207	39122208	+	APA	0.068069	0.51229	-0.44422	0.911	K2	1.2466	shortening	distal
ENSG00000139793.18	MBNL2	15	chr13	97392009	97394119	+	APA	0.34204	0.44837	-0.10633	0.911	K2	1.818	shortening	distal
ENSG00000164087.7	POC1A	16	chr3	52075253	52075285	-	APA	0.17675	0.55402	-0.37727	0.911	K2	1.4066	shortening	distal
ENSG00000110801.13	PSMD9	20	chr12	121916644	121916644	+	APA	0.050952	0.25884	-0.20789	0.911	K3	1.0248	shortening	distal
ENSG00000151239.13	TWF1	20	chr12	43793725	43795492	-	APA	0.34337	0.47247	-0.1291	0.911	K2	1.5821	shortening	distal
ENSG00000157895.11	C12orf43	15	chr12	121003793	121003875	-	APA	0.42905	0.60854	-0.17949	0.91	K2	1.5372	shortening	distal
ENSG00000130559.18	CAMSAP1	23	chr9	135809581	135810422	-	APA	0.61709	0.71878	-0.1017	0.91	K1	0.988	shortening	distal
ENSG00000213782.7	DDX47	25	chr12	12829423	12829979	+	APA	0.45649	0.99168	-0.53519	0.91	K1	0.9043	shortening	distal
ENSG00000105755.7	ETHE1	14	chr19	43506792	43506902	-	APA	0.64793	0.33565	0.31228	0.91	K1	0.9829	shortening	proximal
ENSG00000152377.13	SPOCK1	14	chr5	136978454	136978844	-	APA	0.081517	0.43432	-0.35281	0.91	K1	0.9492	shortening	distal
ENSG00000137207.11	YIPF3	27	chr6	43512220	43512315	-	APA	0.0328	0.13776	-0.10496	0.91	K2	1.5193	shortening	distal
ENSG00000062370.16	ZNF112	7	chr19	44329788	44329936	-	APA	0.35541	0.10677	0.24863	0.91	K2	1.5785	shortening	proximal
ENSG00000171606.17	ZNF274	22	chr19	58210443	58210709	+	APA	0.33333	0.71625	-0.38292	0.91	K2	0.9769	shortening	distal
ENSG00000105136.20	ZNF419	21	chr19	57494673	57494680	+	APA	0.0092519	0.57005	-0.5608	0.91	K3	0.9042	shortening	distal
ENSG00000119559.15	C19orf25	13	chr19	1474174	1475258	-	APA	0.54479	0.014233	0.53055	0.909	K3	1.5077	shortening	proximal
ENSG00000182504.10	CEP97	18	chr3	101764847	101765042	+	APA	0.043928	0.30073	-0.2568	0.909	K2	1.4877	shortening	distal
ENSG00000187118.12	CMC1	12	chr3	28319509	28319741	+	APA	0.92623	0.77161	0.15462	0.909	K3	1.1764	shortening	proximal
ENSG00000145332.13	KLHL8	20	chr4	87162444	87162521	-	APA	0.044747	0.18017	-0.13542	0.909	K3	2.0813	shortening	distal
ENSG00000123836.14	PFKFB2	23	chr1	207079676	207081024	+	APA	0.49057	0.78386	-0.29329	0.909	K2	1.2213	shortening	distal
ENSG00000101098.12	RIMS4	9	chr20	44751808	44755910	-	APA	0.69983	0.87493	-0.1751	0.909	K1	0.9563	shortening	distal
ENSG00000171044.10	XKR6	6	chr8	10896523	10898916	-	APA	0.63897	0.20979	0.42918	0.909	K1	0.9998	shortening	proximal
ENSG00000234996.4	AC098934.2	5	chr1	202874327	202875241	+	APA	0.3626	0.57471	-0.21212	0.908	K1	0.9884	shortening	distal
ENSG00000205436.7	EXOC3L4	15	chr14	103110272	103110547	+	APA	0.57724	0.83	-0.25276	0.908	K1	0.9789	shortening	distal
ENSG00000177082.12	WDR73	31	chr15	84643055	84643081	-	APA	0.45419	0.6668	-0.21261	0.908	K3	1.9932	shortening	distal
ENSG00000196724.12	ZNF418	15	chr19	57922266	57922629	-	APA	0.053941	0.45085	-0.39691	0.908	K2	0.9805	shortening	distal
ENSG00000137760.14	ALKBH8	18	chr11	107504598	107504657	-	APA	0.87196	0.97561	-0.10365	0.907	K1	0.7654	shortening	distal
ENSG00000235919.4	ASH1L-AS1	4	chr1	155563250	155563646	+	APA	0.2849	0.077885	0.20702	0.907	K1	0.9982	shortening	proximal
ENSG00000103995.13	CEP152	42	chr15	48737935	48738150	-	APA	0.39012	0.55852	-0.1684	0.907	K1	0.9999	shortening	distal
ENSG00000137942.16	FNBP1L	19	chr1	93552409	93552579	+	APA	0.38832	0.26468	0.12364	0.907	K1	0.9906	shortening	proximal
ENSG00000180228.12	PRKRA	21	chr2	178431415	178431653	-	APA	0.47374	0.65821	-0.18448	0.907	K3	1.7267	shortening	distal
ENSG00000145916.18	RMND5B	25	chr5	178148567	178148568	+	APA	0.36556	0.15615	0.20941	0.907	K3	1.8806	shortening	proximal
ENSG00000072958.8	AP1M1	19	chr19	16234765	16234784	+	APA	0.29672	0.16449	0.13224	0.906	K2	0.9434	shortening	proximal
ENSG00000152904.11	GGPS1	9	chr1	235342597	235343093	+	APA	0.3377	0.55374	-0.21604	0.906	K3	1.7665	shortening	distal
ENSG00000101346.13	POFUT1	11	chr20	32234569	32238667	+	APA	0.38674	0.61793	-0.23119	0.906	K1	0.9986	shortening	distal
ENSG00000047315.15	POLR2B	31	chr4	57031008	57031158	+	APA	0.39399	0.54362	-0.14963	0.906	K2	0.9997	shortening	distal
ENSG00000063176.15	SPHK2	24	chr19	48629917	48630405	+	APA	0.53807	0.73624	-0.19817	0.906	K2	0.9969	shortening	distal
ENSG00000011638.10	TMEM159	15	chr16	21180506	21180609	+	APA	0.15926	0.032919	0.12634	0.906	K3	1.4977	shortening	proximal
ENSG00000170417.15	TMEM182	11	chr2	102815105	102816316	+	APA	0.17035	0.31992	-0.14957	0.906	K3	2.0894	shortening	distal
ENSG00000224032.6	EPB41L4A-AS1	7	chr5	112162303	112162324	+	APA	0.29639	0.52749	-0.2311	0.905	K2	1.3031	shortening	distal
ENSG00000196876.15	SCN8A	36	chr12	51806282	51807429	+	APA	0.19808	0.56716	-0.36908	0.905	K1	1	shortening	distal
ENSG00000161558.10	TMEM143	20	chr19	48332357	48332360	-	APA	0.017317	0.53821	-0.52089	0.905	K2	1.0152	shortening	medium
ENSG00000171316.11	CHD7	16	chr8	60865126	60865133	+	APA	0.59111	0.36832	0.22279	0.904	K2	1.1985	shortening	proximal
ENSG00000100335.13	MIEF1	20	chr22	39515230	39515708	+	APA	0.23446	0.11362	0.12084	0.904	K2	1.556	shortening	proximal
ENSG00000177707.10	NECTIN3	10	chr3	111133661	111133990	+	APA	0.19184	0.47149	-0.27964	0.904	K1	0.9994	shortening	distal
ENSG00000068878.14	PSME4	53	chr2	53864861	53864869	-	APA	0.086398	0.32633	-0.23993	0.904	K2	1.3616	shortening	distal
ENSG00000135622.12	SEMA4F	20	chr2	74680747	74682059	+	APA	0.59818	0.82072	-0.22254	0.904	K2	1.2691	shortening	distal
ENSG00000124104.18	SNX21	17	chr20	45841135	45841730	+	APA	0.65208	0.86248	-0.2104	0.904	K2	0.9977	shortening	distal
ENSG00000156931.15	VPS8	59	chr3	185052312	185052604	+	APA	0.44669	0.95147	-0.50478	0.904	K2	1.4761	shortening	distal
ENSG00000233429.9	HOTAIRM1	8	chr7	27100140	27100154	+	APA	0.060655	0.29018	-0.22953	0.903	K2	1.8748	shortening	distal
ENSG00000040933.15	INPP4A	37	chr2	98587662	98587859	+	APA	0.22267	0.37449	-0.15182	0.903	K2	1.7917	shortening	distal
ENSG00000114857.17	NKTR	35	chr3	42637001	42637035	+	APA	0.35163	0.4477	-0.096078	0.903	K3	1.8202	shortening	distal
ENSG00000118873.15	RAB3GAP2	44	chr1	220148293	220151182	-	APA	0.37114	0.49746	-0.12632	0.903	K2	1.1302	shortening	distal
ENSG00000165821.11	SALL2	18	chr14	21521083	21521536	-	APA	0.57753	0.7697	-0.19217	0.903	K3	1.6444	shortening	distal
ENSG00000102100.15	SLC35A2	12	chrX	48905859	48905955	-	APA	0.8334	0.9639	-0.1305	0.903	K1	0.7442	shortening	distal
ENSG00000167987.10	VPS37C	11	chr11	61130256	61132443	-	APA	0.57055	0.7304	-0.15985	0.903	K1	0.9959	shortening	distal
ENSG00000251247.10	ZNF345	9	chr19	36878602	36879569	+	APA	0.24045	0.45611	-0.21566	0.903	K2	1.3134	shortening	distal
ENSG00000137760.14	ALKBH8	17	chr11	107504658	107505215	-	APA	0.12957	0.024509	0.10506	0.902	K1	0.7654	shortening	proximal
ENSG00000117682.16	DHDDS	28	chr1	26469374	26469439	+	APA	0.25322	0.38314	-0.12992	0.902	K2	1.3562	shortening	distal
ENSG00000117228.9	GBP1	18	chr1	89053362	89053468	-	APA	0.068451	0.26132	-0.19287	0.902	K2	1.5609	shortening	distal
ENSG00000050426.15	LETMD1	41	chr12	51060414	51060418	+	APA	0.48235	0.27875	0.2036	0.902	K4	2.2862	shortening	proximal
ENSG00000105085.10	MED26	11	chr19	16574919	16576029	-	APA	0.64384	0.75681	-0.11297	0.902	K2	0.9848	shortening	distal
ENSG00000185664.14	PMEL	17	chr12	55957109	55957258	-	APA	0.58273	0.8684	-0.28567	0.902	K2	0.9991	shortening	distal
ENSG00000136143.14	SUCLA2	16	chr13	47942656	47943360	-	APA	0.33875	0.45743	-0.11867	0.902	K1	0.9998	shortening	distal
ENSG00000104517.12	UBR5	64	chr8	102253736	102253945	-	APA	0.35447	0.4691	-0.11463	0.902	K2	1.5799	shortening	distal
ENSG00000154832.14	CXXC1	43	chr18	50282349	50282532	-	APA	0.42396	0.1477	0.27626	0.901	K3	1.2153	shortening	proximal
ENSG00000150990.7	DHX37	33	chr12	124947601	124947887	-	APA	0.15058	0.32198	-0.1714	0.901	K2	1.7374	shortening	distal
ENSG00000105755.7	ETHE1	15	chr19	43506719	43506791	-	APA	0.34936	0.66736	-0.318	0.901	K1	0.9829	shortening	distal
ENSG00000110429.13	FBXO3	27	chr11	33740956	33740964	-	APA	0.0052752	0.56746	-0.56219	0.901	K3	0.8243	shortening	distal
ENSG00000085276.17	MECOM	35	chr3	169083507	169084761	-	APA	0.61547	0.82099	-0.20552	0.901	K3	1.3588	shortening	distal
ENSG00000110218.8	PANX1	7	chr11	94180802	94181966	+	APA	0.46734	0.99593	-0.52859	0.901	K1	0.9726	shortening	distal
ENSG00000173262.11	SLC2A14	32	chr12	7813529	7813800	-	APA	0.045959	0.21973	-0.17377	0.901	K3	1.7025	shortening	distal
ENSG00000117528.11	ABCD3	28	chr1	94518497	94518663	+	APA	0.12387	0.25562	-0.13175	0.9	K2	1.0156	shortening	distal
ENSG00000213983.11	AP1G2	59	chr14	23559576	23559607	-	APA	0.08711	0.25046	-0.16335	0.9	K3	1.3681	shortening	distal
ENSG00000140848.16	CPNE2	29	chr16	57147796	57147964	+	APA	0.32383	0.5127	-0.18887	0.9	K3	1.5019	shortening	distal
ENSG00000224032.6	EPB41L4A-AS1	6	chr5	112162151	112162302	+	APA	0.6429	0.40946	0.23345	0.9	K2	1.3031	shortening	proximal
ENSG00000056998.19	GYG2	20	chrX	2881441	2882817	+	APA	0.59522	0.66928	-0.1	0.9	K3	1.6068	shortening	distal
ENSG00000010626.14	LRRC23	15	chr12	6914072	6914228	+	APA	0.73077	0.94185	-0.21108	0.9	K2	0.9753	shortening	distal
ENSG00000010626.14	LRRC23	14	chr12	6913891	6914071	+	APA	0.26375	0.056517	0.20723	0.9	K2	0.9753	shortening	proximal
ENSG00000138750.14	NUP54	24	chr4	76115087	76115205	-	APA	0.35761	0.47296	-0.11535	0.9	K3	1.8995	shortening	distal
ENSG00000047315.15	POLR2B	30	chr4	57030899	57031007	+	APA	0.60784	0.45486	0.15298	0.9	K2	0.9997	shortening	proximal
ENSG00000101098.12	RIMS4	8	chr20	44755911	44756352	-	APA	0.29937	0.12473	0.17463	0.9	K1	0.9563	shortening	proximal
ENSG00000070423.17	RNF126	19	chr19	647526	647529	-	APA	0.16446	0.5366	-0.37213	0.9	K2	1.488	shortening	distal
ENSG00000063176.15	SPHK2	23	chr19	48629774	48629916	+	APA	0.46211	0.26495	0.19716	0.9	K2	0.9969	shortening	proximal
ENSG00000167987.10	VPS37C	10	chr11	61132444	61132539	-	APA	0.42972	0.26968	0.16004	0.9	K1	0.9959	shortening	proximal
ENSG00000148225.15	WDR31	15	chr9	113315684	113316909	-	APA	0.055114	0.29446	-0.23934	0.9	K2	0.9995	shortening	distal
ENSG00000011638.10	TMEM159	16	chr16	21180610	21180616	+	APA	0.08161	0.23587	-0.15426	0.899	K3	1.4977	shortening	distal

## Sheet: 3UTR_lengthened_genes
Gene	Symbol	Node	chr	start	end	Strand	Type	PSI(LNA-DSCAM-AS1)	PSI(LNA-CTRL)	DeltaPsi(PSI(LNA-DSCAM-AS1) - PSI(LNA-CTRL))	Probability	Complexity	Entropy	3'UTR effect	APA site
ENSG00000267751.5	AC009005.1	8	chr19	567433	567624	-	APA	0.6176	0.049138	0.56846	1	K2	1.281	lengthening	distal
ENSG00000169814.12	BTD	17	chr3	15645583	15645715	+	APA	0.18266	0.0025354	0.18013	1	K3	1.3661	lengthening	distal
ENSG00000111665.11	CDCA3	23	chr12	6844859	6846367	-	APA	0.010775	0.21754	-0.20677	1	K2	0.8993	lengthening	proximal
ENSG00000101639.18	CEP192	58	chr18	13124632	13124995	+	APA	0.52135	0.96286	-0.4415	1	K3	0.9994	lengthening	proximal
ENSG00000134852.14	CLOCK	33	chr4	55434823	55435021	-	APA	0.33746	0.043335	0.29412	1	K2	1.263	lengthening	distal
ENSG00000103187.7	COTL1	11	chr16	84565602	84566549	-	APA	0.81078	0.99866	-0.18789	1	K2	0.884	lengthening	proximal
ENSG00000164733.20	CTSB	23	chr8	11844324	11844354	-	APA	0.10448	0.0036476	0.10083	1	K3	1.324	lengthening	distal
ENSG00000272886.5	DCP1A	12	chr3	53287370	53287660	-	APA	0.005708	0.34261	-0.3369	1	K2	1.0569	lengthening	proximal
ENSG00000146267.11	FAXC	8	chr6	99280735	99281453	-	APA	0.32667	0.94371	-0.61704	1	K2	1.1401	lengthening	proximal
ENSG00000146267.11	FAXC	9	chr6	99280667	99280734	-	APA	0.64811	0.039412	0.6087	1	K2	1.1401	lengthening	distal
ENSG00000173083.14	HPSE	16	chr4	83295320	83295343	-	APA	0.65847	0.04922	0.60925	1	K2	1.1653	lengthening	distal
ENSG00000115221.10	ITGB6	26	chr2	160101736	160101834	-	APA	0.014988	0.46293	-0.44794	1	K2	1.5302	lengthening	proximal
ENSG00000134248.13	LAMTOR5	15	chr1	110401257	110401583	-	APA	0.83394	0.99856	-0.16462	1	K2	0.8352	lengthening	proximal
ENSG00000002834.17	LASP1	19	chr17	38921762	38921769	+	APA	0.6785	0.52669	0.15181	1	K2	1.4839	lengthening	distal
ENSG00000157193.15	LRP8	27	chr1	53246568	53247017	-	APA	0.013891	0.54998	-0.53609	1	K2	1.2137	lengthening	proximal
ENSG00000157193.15	LRP8	28	chr1	53246553	53246567	-	APA	0.56206	0.016583	0.54547	1	K2	1.2137	lengthening	distal
ENSG00000227507.2	LTB	9	chr6	31580555	31580623	-	APA	0.92835	0.21388	0.71446	1	K1	0.9139	lengthening	distal
ENSG00000109339.20	MAPK10	203	chr4	86016536	86016603	-	APA	0.52488	0.046545	0.47834	1	K6	1.4186	lengthening	distal
ENSG00000165792.17	METTL17	34	chr14	20996812	20997009	+	APA	0.039275	0.94339	-0.90412	1	K2	0.9969	lengthening	proximal
ENSG00000165792.17	METTL17	35	chr14	20997010	20997010	+	APA	0.61324	0.057046	0.5562	1	K2	0.9969	lengthening	distal
ENSG00000235989.3	MORC2-AS1	4	chr22	30924729	30926550	+	APA	0.60022	0.98963	-0.3894	1	K1	0.9993	lengthening	proximal
ENSG00000235989.3	MORC2-AS1	5	chr22	30926551	30926654	+	APA	0.40005	0.010495	0.38955	1	K1	0.9993	lengthening	distal
ENSG00000103024.7	NME3	18	chr16	1770649	1770766	-	APA	0.22503	0.11195	0.11308	1	K3	1.9602	lengthening	distal
ENSG00000059378.12	PARP12	15	chr7	140023749	140024885	-	APA	0.87361	0.99791	-0.12429	1	K1	0.7225	lengthening	proximal
ENSG00000168300.13	PCMTD1	13	chr8	51820340	51820718	-	APA	0.27051	0.031808	0.2387	1	K2	1.5159	lengthening	distal
ENSG00000143870.12	PDIA6	21	chr2	10783391	10783392	-	APA	0.26844	0.0099016	0.25854	1	K2	1.2515	lengthening	distal
ENSG00000054690.13	PLEKHH1	42	chr14	67587301	67587548	+	APA	0.021274	0.26257	-0.2413	1	K1	0.8934	lengthening	proximal
ENSG00000147274.14	RBMX	19	chrX	136869194	136870417	-	APA	0.016157	0.29743	-0.28127	1	K2	0.9636	lengthening	proximal
ENSG00000147274.14	RBMX	20	chrX	136869192	136869193	-	APA	0.98253	0.70129	0.28124	1	K2	0.9636	lengthening	distal
ENSG00000005486.16	RHBDD2	13	chr7	75888885	75888921	+	APA	0.46054	0.25646	0.20408	1	K3	1.932	lengthening	distal
ENSG00000174791.10	RIN1	22	chr11	66332590	66332752	-	APA	0.22759	0.008541	0.21905	1	K3	1.8396	lengthening	distal
ENSG00000189334.8	S100A14	6	chr1	153614258	153615022	-	APA	0.86336	0.9976	-0.13423	1	K1	0.7185	lengthening	proximal
ENSG00000189334.8	S100A14	7	chr1	153614255	153614257	-	APA	0.13663	0.0023677	0.13426	1	K1	0.7185	lengthening	distal
ENSG00000160633.12	SAFB	37	chr19	5668350	5668466	+	APA	0.046627	0.32535	-0.27872	1	K3	1.396	lengthening	proximal
ENSG00000104205.12	SGK3	20	chr8	66859411	66860455	+	APA	0.0034411	0.10622	-0.10278	1	K2	1.3687	lengthening	proximal
ENSG00000092531.9	SNAP23	17	chr15	42533060	42533061	+	APA	0.34224	0.068812	0.27343	1	K3	2.0386	lengthening	distal
ENSG00000040341.17	STAU2	32	chr8	73551830	73551895	-	APA	0.22043	0.11428	0.10614	1	K3	1.9892	lengthening	distal
ENSG00000196502.11	SULT1A1	24	chr16	28605587	28605590	-	APA	0.71986	0.030056	0.68981	1	K3	1.2208	lengthening	distal
ENSG00000213593.9	TMX2	14	chr11	57740099	57740369	+	APA	0.099623	0.001176	0.098447	1	K2	0.5918	lengthening	distal
ENSG00000140416.19	TPM1	47	chr15	63071324	63071884	+	APA	0.14175	0.29582	-0.15407	1	K3	1.9551	lengthening	proximal
ENSG00000140416.19	TPM1	48	chr15	63071885	63071889	+	APA	0.28041	0.1354	0.14502	1	K3	1.9551	lengthening	distal
ENSG00000205133.11	TRIQK	21	chr8	92885335	92885713	-	APA	0.0021234	0.15137	-0.14924	1	K3	2.4529	lengthening	distal
ENSG00000109775.10	UFSP2	15	chr4	185400315	185400478	-	APA	0.044341	0.59286	-0.54852	1	K2	0.9999	lengthening	proximal
ENSG00000143258.15	USP21	27	chr1	161165357	161165714	+	APA	0.20652	0.97057	-0.76405	1	K1	0.9676	lengthening	proximal
ENSG00000143258.15	USP21	28	chr1	161165715	161165723	+	APA	0.79474	0.031564	0.76318	1	K1	0.9676	lengthening	distal
ENSG00000198492.15	YTHDF2	13	chr1	28768929	28769125	+	APA	0.0014676	0.1294	-0.12794	1	K1	0.6222	lengthening	proximal
ENSG00000198492.15	YTHDF2	14	chr1	28769126	28769775	+	APA	0.99856	0.87043	0.12812	1	K1	0.6222	lengthening	distal
ENSG00000151612.15	ZNF827	20	chr4	145760738	145761598	-	APA	0.029488	0.44652	-0.41703	1	K2	0.9628	lengthening	proximal
ENSG00000151612.15	ZNF827	22	chr4	145757627	145760728	-	APA	0.97021	0.55769	0.41252	1	K2	0.9628	lengthening	distal
ENSG00000103222.18	ABCC1	38	chr16	16141526	16143062	+	APA	0.911	0.77521	0.13579	0.999	K1	0.8024	lengthening	distal
ENSG00000175455.14	CCDC14	28	chr3	123914622	123915132	-	APA	0.12728	0.0034563	0.12383	0.999	K3	1.5248	lengthening	distal
ENSG00000221978.11	CCNL2	39	chr1	1387122	1387231	-	APA	0.35893	0.25918	0.099746	0.999	K4	2.0957	lengthening	distal
ENSG00000101639.18	CEP192	59	chr18	13124996	13125034	+	APA	0.48283	0.037277	0.44555	0.999	K3	0.9994	lengthening	distal
ENSG00000134852.14	CLOCK	32	chr4	55435022	55435594	-	APA	0.016692	0.26655	-0.24986	0.999	K2	1.263	lengthening	proximal
ENSG00000144401.14	METTL21A	15	chr2	207609115	207612103	-	APA	0.40278	0.25478	0.148	0.999	K3	1.7461	lengthening	distal
ENSG00000129933.20	MAU2	30	chr19	19357754	19357755	+	APA	0.16277	0.067505	0.095264	0.999	K3	2.1833	lengthening	distal
ENSG00000078674.17	PCM1	59	chr8	18027637	18027747	+	APA	0.31233	0.019828	0.2925	0.999	K3	1.6661	lengthening	distal
ENSG00000140992.18	PDPK1	23	chr16	2597651	2597920	+	APA	0.0087887	0.12794	-0.11915	0.999	K2	0.7218	lengthening	proximal
ENSG00000054690.13	PLEKHH1	43	chr14	67587549	67587681	+	APA	0.97886	0.73668	0.24218	0.999	K1	0.8934	lengthening	distal
ENSG00000172602.9	RND1	8	chr12	48857147	48858096	-	APA	0.8787	0.55982	0.31888	0.999	K2	1.1261	lengthening	distal
ENSG00000033867.16	SLC4A7	35	chr3	27376764	27376845	-	APA	0.0014373	0.38494	-0.3835	0.999	K2	1.4608	lengthening	proximal
ENSG00000092531.9	SNAP23	16	chr15	42531828	42533059	+	APA	0.081867	0.44106	-0.35919	0.999	K3	2.0386	lengthening	proximal
ENSG00000186591.11	UBE2H	9	chr7	129834978	129835061	-	APA	0.00039021	0.10999	-0.1096	0.999	K2	1.3921	lengthening	proximal
ENSG00000121671.11	CRY2	17	chr11	45881050	45881233	+	APA	0.11778	0.0016542	0.11613	0.998	K3	1.9728	lengthening	distal
ENSG00000134248.13	LAMTOR5	16	chr1	110401253	110401256	-	APA	0.16636	0.0014437	0.16492	0.998	K2	0.8352	lengthening	distal
ENSG00000227507.2	LTB	8	chr6	31580624	31581163	-	APA	0.073753	0.78381	-0.71005	0.998	K1	0.9139	lengthening	proximal
ENSG00000204237.4	OXLD1	16	chr17	81665141	81665155	-	APA	0.095883	0.35114	-0.25526	0.998	K3	2.1172	lengthening	proximal
ENSG00000059378.12	PARP12	16	chr7	140023744	140023748	-	APA	0.1268	0.0020187	0.12478	0.998	K1	0.7225	lengthening	distal
ENSG00000115233.11	PSMD14	16	chr2	161411302	161411715	+	APA	0.69201	0.99802	-0.30601	0.998	K1	0.9983	lengthening	proximal
ENSG00000115233.11	PSMD14	17	chr2	161411716	161411717	+	APA	0.30782	0.001917	0.3059	0.998	K1	0.9983	lengthening	distal
ENSG00000172602.9	RND1	7	chr12	48858097	48858241	-	APA	0.074656	0.41178	-0.33712	0.998	K2	1.1261	lengthening	proximal
ENSG00000039123.15	SKIV2L2	32	chr5	55424720	55424985	+	APA	0.3765	0.57528	-0.19877	0.998	K2	1.5276	lengthening	proximal
ENSG00000143569.18	UBAP2L	39	chr1	154263103	154263322	+	APA	0.01809	0.15154	-0.13345	0.998	K1	0.6625	lengthening	proximal
ENSG00000101557.14	USP14	19	chr18	211133	211350	+	APA	0.41346	0.51002	-0.096562	0.998	K2	1.5147	lengthening	proximal
ENSG00000187607.15	ZNF286A	15	chr17	15716059	15716490	+	APA	0.12739	0.0018203	0.12557	0.998	K2	1.3752	lengthening	distal
ENSG00000103222.18	ABCC1	37	chr16	16141173	16141525	+	APA	0.089165	0.22438	-0.13522	0.997	K1	0.8024	lengthening	proximal
ENSG00000143515.16	ATP8B2	32	chr1	154349460	154351307	+	APA	0.66515	0.44727	0.21788	0.997	K1	0.9998	lengthening	distal
ENSG00000103187.7	COTL1	12	chr16	84565594	84565601	-	APA	0.18975	0.0013255	0.18843	0.997	K2	0.884	lengthening	distal
ENSG00000141448.8	GATA6	8	chr18	22200656	22200880	+	APA	0.28269	0.56617	-0.28348	0.997	K1	0.9978	lengthening	proximal
ENSG00000205531.12	NAP1L4	26	chr11	2944431	2944436	-	APA	0.13974	0.0013202	0.13842	0.997	K2	0.9419	lengthening	distal
ENSG00000170525.19	PFKFB3	24	chr10	6233091	6233368	+	APA	0.13269	0.023238	0.10945	0.997	K2	0.8498	lengthening	distal
ENSG00000151353.14	TMEM18	10	chr2	669189	669210	-	APA	0.1305	0.013842	0.11666	0.997	K2	1.2783	lengthening	distal
ENSG00000143569.18	UBAP2L	40	chr1	154263323	154263505	+	APA	0.98182	0.84815	0.13367	0.997	K1	0.6625	lengthening	distal
ENSG00000109501.13	WFS1	13	chr4	6300657	6300807	+	APA	0.00078396	0.12609	-0.12531	0.997	K2	1.2796	lengthening	proximal
ENSG00000172888.11	ZNF621	11	chr3	40532862	40533526	+	APA	0.15331	0.0025765	0.15073	0.997	K2	1.806	lengthening	distal
ENSG00000143515.16	ATP8B2	31	chr1	154348840	154349459	+	APA	0.33254	0.55043	-0.21789	0.996	K1	0.9998	lengthening	proximal
ENSG00000069998.12	HDHD5	16	chr22	17137582	17138357	-	APA	0.61991	0.34559	0.27432	0.996	K2	1.6857	lengthening	distal
ENSG00000002834.17	LASP1	18	chr17	38920307	38921761	+	APA	0.080892	0.2862	-0.2053	0.996	K2	1.4839	lengthening	proximal
ENSG00000150054.18	MPP7	26	chr10	28050993	28051167	-	APA	0.15238	0.0091528	0.14323	0.996	K2	0.914	lengthening	distal
ENSG00000139531.12	SUOX	12	chr12	56005487	56005525	+	APA	0.14531	0.013748	0.13156	0.996	K1	0.7273	lengthening	distal
ENSG00000107021.15	TBC1D13	14	chr9	128810425	128810432	+	APA	0.9622	0.60324	0.35896	0.996	K1	0.999	lengthening	distal
ENSG00000196526.10	AFAP1	21	chr4	7763567	7763791	-	APA	0.1265	0.002812	0.12369	0.995	K2	1.9684	lengthening	distal
ENSG00000145860.11	RNF145	18	chr5	159158291	159158298	-	APA	0.34703	0.46985	-0.12282	0.995	K3	1.3968	lengthening	proximal
ENSG00000145860.11	RNF145	19	chr5	159157411	159158290	-	APA	0.56369	0.45935	0.10435	0.995	K3	1.3968	lengthening	distal
ENSG00000160633.12	SAFB	38	chr19	5668467	5668471	+	APA	0.12661	0.0065921	0.12001	0.995	K3	1.396	lengthening	medium
ENSG00000100519.11	PSMC6	33	chr14	52727992	52727995	+	APA	0.24662	0.0017314	0.24488	0.994	K3	1.7731	lengthening	distal
ENSG00000167705.11	RILP	11	chr17	1646150	1646192	-	APA	0.87771	0.3696	0.50812	0.994	K1	1	lengthening	distal
ENSG00000071242.11	RPS6KA2	28	chr6	166412748	166412887	-	APA	0.0047108	0.15112	-0.14641	0.994	K3	1.4433	lengthening	proximal
ENSG00000116521.10	SCAMP3	16	chr1	155255979	155255980	-	APA	0.2014	0.0026133	0.19879	0.994	K2	1.5633	lengthening	distal
ENSG00000151923.17	TIAL1	26	chr10	119575437	119575791	-	APA	0.7642	0.55871	0.20549	0.994	K3	1.8246	lengthening	distal
ENSG00000157954.14	WIPI2	26	chr7	5230835	5230947	+	APA	0.1339	0.0012369	0.13267	0.994	K3	2.0895	lengthening	distal
ENSG00000169155.9	ZBTB43	5	chr9	126836220	126836412	+	APA	0.13524	0.0066935	0.12855	0.994	K2	0.9608	lengthening	distal
ENSG00000171634.16	BPTF	45	chr17	67982289	67982551	+	APA	0.0017382	0.13905	-0.13731	0.993	K3	1.6971	lengthening	proximal
ENSG00000072134.15	EPN2	29	chr17	19334491	19335174	+	APA	0.3731	0.00214	0.37096	0.993	K2	1.4675	lengthening	distal
ENSG00000213930.11	GALT	34	chr9	34650584	34650598	+	APA	0.74426	0.056056	0.6882	0.993	K2	1.3779	lengthening	distal
ENSG00000152620.12	NADK2	19	chr5	36195144	36195282	-	APA	0.0038252	0.17477	-0.17094	0.993	K3	2.1066	lengthening	proximal
ENSG00000166228.8	PCBD1	7	chr10	70883510	70883931	-	APA	0.64834	0.51037	0.13797	0.993	K1	0.9999	lengthening	distal
ENSG00000143870.12	PDIA6	20	chr2	10783393	10783860	-	APA	0.061264	0.3101	-0.24884	0.993	K2	1.2515	lengthening	proximal
ENSG00000132530.16	XAF1	16	chr17	6774109	6775647	+	APA	0.8369	0.72557	0.11132	0.993	K2	1.1899	lengthening	distal
ENSG00000039319.16	ZFYVE16	34	chr5	80479136	80479140	+	APA	0.0056104	0.19565	-0.19004	0.993	K3	1.6358	lengthening	proximal
ENSG00000162174.12	ASRGL1	21	chr11	62392586	62393406	+	APA	0.93651	0.69669	0.23982	0.992	K2	1.0815	lengthening	distal
ENSG00000141448.8	GATA6	9	chr18	22200881	22202528	+	APA	0.71623	0.43069	0.28553	0.992	K1	0.9978	lengthening	distal
ENSG00000092208.16	GEMIN2	20	chr14	39136747	39136775	+	APA	0.30068	0.18318	0.1175	0.992	K3	0.9521	lengthening	distal
ENSG00000093167.17	LRRFIP2	37	chr3	37053721	37053961	-	APA	0.21489	0.0042487	0.21064	0.992	K3	1.8392	lengthening	distal
ENSG00000179364.13	PACS2	38	chr14	105394554	105394672	+	APA	0.5338	0.41124	0.12256	0.992	K2	1.5415	lengthening	distal
ENSG00000166228.8	PCBD1	6	chr10	70883932	70884048	-	APA	0.35142	0.48965	-0.13823	0.992	K1	0.9999	lengthening	proximal
ENSG00000224281.4	SLC25A5-AS1	6	chrX	119466424	119467750	-	APA	0.13718	0.74306	-0.60588	0.992	K1	0.8911	lengthening	proximal
ENSG00000224281.4	SLC25A5-AS1	7	chrX	119466034	119466423	-	APA	0.86338	0.25846	0.60491	0.992	K1	0.8911	lengthening	distal
ENSG00000115234.10	SNX17	31	chr2	27376606	27377123	+	APA	0.0046804	0.29447	-0.28979	0.992	K2	1.2234	lengthening	proximal
ENSG00000196704.11	AMZ2	15	chr17	68257156	68257156	+	APA	0.215	0.0021342	0.21286	0.991	K2	1.7218	lengthening	distal
ENSG00000152527.13	PLEKHH2	38	chr2	43765793	43767987	+	APA	0.87542	0.46168	0.41374	0.991	K1	0.9989	lengthening	distal
ENSG00000124222.22	STX16	18	chr20	58676329	58676486	+	APA	0.34689	0.23259	0.1143	0.991	K2	1.3522	lengthening	distal
ENSG00000139531.12	SUOX	11	chr12	56003618	56005486	+	APA	0.85454	0.98644	-0.13189	0.991	K1	0.7273	lengthening	proximal
ENSG00000089737.16	DDX24	19	chr14	94050938	94051187	-	APA	0.1262	0.27187	-0.14567	0.99	K3	1.6108	lengthening	proximal
ENSG00000114316.12	USP4	30	chr3	49278106	49278142	-	APA	0.16759	0.0052082	0.16238	0.99	K2	1.5457	lengthening	distal
ENSG00000105656.12	ELL	20	chr19	18442665	18444515	-	APA	0.68013	0.41895	0.26118	0.989	K2	1.5842	lengthening	distal
ENSG00000106683.14	LIMK1	23	chr7	74121139	74121301	+	APA	0.002964	0.11181	-0.10885	0.989	K2	1.0022	lengthening	proximal
ENSG00000047849.21	MAP4	32	chr3	47850690	47850695	-	APA	0.13569	0.012547	0.12315	0.989	K2	1.4787	lengthening	distal
ENSG00000133818.13	RRAS2	11	chr11	14279110	14279424	-	APA	0.0023866	0.18753	-0.18515	0.989	K3	1.851	lengthening	proximal
ENSG00000160633.12	SAFB	39	chr19	5668472	5668478	+	APA	0.15482	0.0067129	0.14811	0.989	K3	1.396	lengthening	distal
ENSG00000091490.10	SEL1L3	33	chr4	25748266	25748564	-	APA	0.14785	0.024311	0.12354	0.989	K3	1.7704	lengthening	distal
ENSG00000163449.10	TMEM169	8	chr2	216101066	216102382	+	APA	0.17857	0.028921	0.14965	0.989	K2	1.5104	lengthening	distal
ENSG00000156345.17	CDK20	31	chr9	87966441	87966445	-	APA	0.14202	0.0072954	0.13472	0.988	K3	1.5461	lengthening	distal
ENSG00000132716.18	DCAF8	12	chr1	160240298	160240370	-	APA	0.59162	0.8517	-0.26008	0.988	K2	1.5092	lengthening	proximal
ENSG00000105656.12	ELL	18	chr19	18444751	18444868	-	APA	0.13307	0.46099	-0.32792	0.988	K2	1.5842	lengthening	proximal
ENSG00000103089.8	FA2H	11	chr16	74713598	74714269	-	APA	0.048667	0.24237	-0.1937	0.988	K1	0.8296	lengthening	proximal
ENSG00000150337.13	FCGR1A	7	chr1	149791237	149791390	+	APA	0.050497	0.48351	-0.43301	0.988	K1	0.9826	lengthening	proximal
ENSG00000113648.16	H2AFY	36	chr5	135334435	135334855	-	APA	0.35612	0.25275	0.10336	0.988	K3	1.7949	lengthening	distal
ENSG00000162599.15	NFIA	18	chr1	61455303	61455562	+	APA	0.21574	0.0067962	0.20894	0.988	K3	1.9391	lengthening	distal
ENSG00000152527.13	PLEKHH2	37	chr2	43765413	43765792	+	APA	0.1286	0.53545	-0.40685	0.988	K1	0.9989	lengthening	proximal
ENSG00000167705.11	RILP	10	chr17	1646193	1646619	-	APA	0.12119	0.63002	-0.50883	0.988	K1	1	lengthening	proximal
ENSG00000156261.12	CCT8	27	chr21	29056329	29056455	-	APA	0.73002	0.95915	-0.22913	0.987	K2	1.3091	lengthening	proximal
ENSG00000069424.14	KCNAB2	31	chr1	6098811	6098855	+	APA	0.21471	0.093655	0.12106	0.987	K3	1.4608	lengthening	distal
ENSG00000104643.9	MTMR9	13	chr8	11322625	11323057	+	APA	0.31613	0.19123	0.1249	0.987	K2	1.5803	lengthening	distal
ENSG00000006432.15	MAP3K9	21	chr14	70722526	70729650	-	APA	0.97047	0.84948	0.12099	0.986	K2	0.9956	lengthening	distal
ENSG00000225190.10	PLEKHM1	17	chr17	45437471	45437969	-	APA	0.13464	0.29994	-0.16531	0.986	K2	1.1253	lengthening	proximal
ENSG00000010072.15	SPRTN	12	chr1	231352610	231352754	+	APA	0.13605	0.013322	0.12273	0.986	K2	1.5214	lengthening	distal
ENSG00000196502.11	SULT1A1	21	chr16	28605597	28605627	-	APA	0.021738	0.56734	-0.54561	0.986	K3	1.2208	lengthening	proximal
ENSG00000107021.15	TBC1D13	13	chr9	128807814	128810424	+	APA	0.037315	0.39651	-0.3592	0.986	K1	0.999	lengthening	proximal
ENSG00000132780.16	NASP	29	chr1	45618061	45618244	+	APA	0.11662	0.0047206	0.1119	0.985	K3	1.2061	lengthening	distal
ENSG00000204237.4	OXLD1	18	chr17	81665056	81665100	-	APA	0.56003	0.23824	0.3218	0.985	K3	2.1172	lengthening	distal
ENSG00000124155.17	PIGT	49	chr20	45426203	45426217	+	APA	0.39885	0.30044	0.098413	0.985	K4	1.6669	lengthening	distal
ENSG00000197483.9	ZNF628	5	chr19	55481201	55481510	+	APA	0.18944	0.0069152	0.18253	0.985	K2	0.9672	lengthening	distal
ENSG00000150337.13	FCGR1A	8	chr1	149791391	149792518	+	APA	0.94945	0.51635	0.4331	0.984	K1	0.9826	lengthening	distal
ENSG00000181991.15	MRPS11	20	chr15	88478252	88478259	+	APA	0.10176	0.0037533	0.098008	0.984	K3	1.7476	lengthening	distal
ENSG00000165795.23	NDRG2	67	chr14	21016838	21016850	-	APA	0.24884	0.0072917	0.24155	0.984	K3	2.1041	lengthening	distal
ENSG00000054148.17	PHPT1	8	chr9	136850755	136851022	+	APA	0.41015	0.6297	-0.21955	0.984	K1	0.9998	lengthening	proximal
ENSG00000225190.10	PLEKHM1	18	chr17	45435904	45437470	-	APA	0.82265	0.66907	0.15358	0.984	K2	1.1253	lengthening	distal
ENSG00000198252.11	STYX	15	chr14	52774942	52774998	+	APA	0.2878	0.11342	0.17438	0.984	K1	0.9627	lengthening	distal
ENSG00000204116.11	CHIC1	11	chrX	73684412	73687102	+	APA	0.76942	0.64004	0.12938	0.983	K2	1.3614	lengthening	distal
ENSG00000054148.17	PHPT1	9	chr9	136851023	136851027	+	APA	0.58949	0.3703	0.21919	0.983	K1	0.9998	lengthening	distal
ENSG00000198252.11	STYX	14	chr14	52771033	52774941	+	APA	0.71163	0.8867	-0.17507	0.983	K1	0.9627	lengthening	proximal
ENSG00000186017.14	ZNF566	12	chr19	36449533	36449763	-	APA	0.51785	0.20609	0.31176	0.983	K3	1.9614	lengthening	distal
ENSG00000104365.13	IKBKB	50	chr8	42331133	42331608	+	APA	0.0075166	0.1601	-0.15259	0.982	K4	2.3402	lengthening	proximal
ENSG00000118263.14	KLF7	11	chr2	207081016	207081264	-	APA	0.21077	0.0052469	0.20552	0.982	K2	1.9135	lengthening	distal
ENSG00000175662.17	TOM1L2	28	chr17	17847349	17847445	-	APA	0.39335	0.26027	0.13308	0.982	K3	1.816	lengthening	distal
ENSG00000138613.13	APH1B	15	chr15	63305802	63306326	+	APA	0.3784	0.22008	0.15832	0.981	K2	1.5741	lengthening	distal
ENSG00000161217.11	PCYT1A	19	chr3	196238551	196238790	-	APA	0.45193	0.31255	0.13938	0.981	K2	1.5838	lengthening	distal
ENSG00000072858.10	SIDT1	31	chr3	113627842	113629578	+	APA	0.51015	0.39098	0.11917	0.98	K2	1.5619	lengthening	distal
ENSG00000151353.14	TMEM18	9	chr2	669211	669675	-	APA	0.75291	0.86859	-0.11568	0.98	K2	1.2783	lengthening	proximal
ENSG00000205133.11	TRIQK	22	chr8	92885320	92885334	-	APA	0.28202	0.077791	0.20423	0.98	K3	2.4529	lengthening	distal
ENSG00000054523.17	KIF1B	27	chr1	10303163	10306757	+	APA	0.33696	0.46176	-0.1248	0.979	K1	0.9999	lengthening	proximal
ENSG00000070087.13	PFN2	22	chr3	149964935	149965347	-	APA	0.26571	0.42488	-0.15917	0.979	K2	1.0507	lengthening	proximal
ENSG00000007341.18	ST7L	39	chr1	112525282	112525882	-	APA	0.0086048	0.15045	-0.14184	0.979	K2	1.3674	lengthening	proximal
ENSG00000137573.13	SULF1	33	chr8	69659409	69660051	+	APA	0.29466	0.0090276	0.28564	0.979	K3	1.8379	lengthening	distal
ENSG00000100483.13	VCPKMT	14	chr14	50108633	50108641	-	APA	0.71786	0.35958	0.35828	0.979	K2	1.7042	lengthening	distal
ENSG00000068120.14	COASY	28	chr17	42566038	42566260	+	APA	0.10847	0.0045099	0.10396	0.978	K3	1.8871	lengthening	distal
ENSG00000103089.8	FA2H	12	chr16	74712955	74713597	-	APA	0.95194	0.75636	0.19559	0.978	K1	0.8296	lengthening	distal
ENSG00000243207.6	PPAN-P2RY11	16	chr19	10114739	10114780	+	APA	0.99008	0.56552	0.42456	0.978	K1	0.9931	lengthening	distal
ENSG00000226287.8	TMEM191A	21	chr22	20704603	20704606	+	APA	0.9404	0.22245	0.71795	0.978	K2	0.9802	lengthening	distal
ENSG00000171729.13	TMEM51	11	chr1	15220409	15220480	+	APA	0.99299	0.89529	0.0977	0.978	K2	0.6744	lengthening	distal
ENSG00000178038.16	ALS2CL	43	chr3	46670572	46670598	-	APA	0.24841	0.010037	0.23837	0.977	K3	1.7139	lengthening	distal
ENSG00000107099.15	DOCK8	68	chr9	464527	465241	+	APA	0.043031	0.61273	-0.56969	0.977	K2	0.959	lengthening	proximal
ENSG00000054523.17	KIF1B	28	chr1	10306758	10308597	+	APA	0.66264	0.5381	0.12453	0.976	K1	0.9999	lengthening	distal
ENSG00000113810.15	SMC4	49	chr3	160433991	160434953	+	APA	0.77662	0.67901	0.097605	0.976	K3	1.4975	lengthening	distal
ENSG00000127452.8	FBXL12	17	chr19	9810861	9810895	-	APA	0.16179	0.032679	0.12912	0.975	K3	1.4134	lengthening	distal
ENSG00000184012.11	TMPRSS2	24	chr21	41466009	41466153	-	APA	0.090386	0.28147	-0.19109	0.975	K2	1.656	lengthening	proximal
ENSG00000106603.18	COA1	26	chr7	43639247	43639256	-	APA	0.16762	0.01317	0.15445	0.974	K2	0.9725	lengthening	distal
ENSG00000107099.15	DOCK8	69	chr9	465242	465255	+	APA	0.95427	0.37297	0.5813	0.974	K2	0.959	lengthening	distal
ENSG00000178177.15	LCORL	9	chr4	17841199	17845496	-	APA	0.75372	0.53631	0.21741	0.974	K1	0.9991	lengthening	distal
ENSG00000205133.11	TRIQK	20	chr8	92885714	92886232	-	APA	0.13073	0.30151	-0.17078	0.974	K3	2.4529	lengthening	medium
ENSG00000055163.19	CYFIP2	54	chr5	157393208	157393223	+	APA	0.40519	0.013886	0.39131	0.973	K3	1.0299	lengthening	distal
ENSG00000132716.18	DCAF8	13	chr1	160240102	160240297	-	APA	0.17909	0.068058	0.11104	0.973	K2	1.5092	lengthening	medium
ENSG00000178053.17	MLF1	20	chr3	158605193	158605392	+	APA	0.15757	0.0092154	0.14835	0.973	K3	1.7695	lengthening	distal
ENSG00000171729.13	TMEM51	10	chr1	15220394	15220408	+	APA	0.0072119	0.10496	-0.097746	0.973	K2	0.6744	lengthening	proximal
ENSG00000242110.7	AMACR	17	chr5	33988084	33988306	-	APA	0.31671	0.66194	-0.34523	0.972	K2	1.4974	lengthening	proximal
ENSG00000144674.16	GOLGA4	43	chr3	37366746	37366749	+	APA	0.44305	0.0033695	0.43968	0.972	K2	1.2464	lengthening	distal
ENSG00000215190.9	LINC00680	14	chr6	57946083	57946546	-	APA	0.99055	0.89366	0.096895	0.972	K2	0.6639	lengthening	distal
ENSG00000108239.8	TBC1D12	14	chr10	94533028	94533297	+	APA	0.24283	0.40022	-0.15738	0.972	K1	0.994	lengthening	proximal
ENSG00000109775.10	UFSP2	16	chr4	185400289	185400314	-	APA	0.431	0.045249	0.38575	0.972	K2	0.9999	lengthening	distal
ENSG00000196704.11	AMZ2	13	chr17	68256814	68257154	+	APA	0.66984	0.99431	-0.32448	0.971	K2	1.7218	lengthening	proximal
ENSG00000132716.18	DCAF8	14	chr1	160239784	160240101	-	APA	0.2348	0.084335	0.15047	0.971	K2	1.5092	lengthening	distal
ENSG00000150995.18	ITPR1	69	chr3	4846139	4846463	+	APA	0.1169	0.010754	0.10614	0.971	K2	1.264	lengthening	distal
ENSG00000177463.15	NR2C2	22	chr3	15043338	15043349	+	APA	0.16209	0.26526	-0.10316	0.971	K2	0.8776	lengthening	proximal
ENSG00000100266.18	PACSIN2	16	chr22	42870930	42871469	-	APA	0.1724	0.058901	0.1135	0.971	K2	0.9927	lengthening	distal
ENSG00000070087.13	PFN2	23	chr3	149964913	149964934	-	APA	0.72939	0.56936	0.16004	0.971	K2	1.0507	lengthening	distal
ENSG00000185238.12	PRMT3	19	chr11	20508304	20508708	+	APA	0.16	0.028906	0.1311	0.971	K2	1.1623	lengthening	distal
ENSG00000196646.11	ZNF136	8	chr19	12186679	12186843	+	APA	0.33887	0.11443	0.22444	0.971	K2	1.9321	lengthening	distal
ENSG00000179750.15	APOBEC3B	15	chr22	38992762	38992784	+	APA	0.46786	0.09046	0.3774	0.97	K2	1.5246	lengthening	distal
ENSG00000091073.19	DTX2	19	chr7	76482616	76482659	+	APA	0.96871	0.72215	0.24655	0.97	K1	0.9988	lengthening	distal
ENSG00000151366.12	NDUFC2	11	chr11	78068304	78068348	-	APA	0.56321	0.15144	0.41177	0.97	K2	0.9932	lengthening	distal
ENSG00000108239.8	TBC1D12	15	chr10	94533298	94535930	+	APA	0.75633	0.60122	0.15511	0.97	K1	0.994	lengthening	distal
ENSG00000100483.13	VCPKMT	12	chr14	50109537	50109713	-	APA	0.065621	0.19448	-0.12886	0.97	K2	1.7042	lengthening	proximal
ENSG00000070761.7	CFAP20	11	chr16	58113960	58114030	-	APA	0.74912	0.88675	-0.13763	0.969	K1	0.9013	lengthening	proximal
ENSG00000152944.8	MED21	4	chr12	27028285	27029485	+	APA	0.087929	0.19264	-0.10472	0.969	K2	1.2052	lengthening	proximal
ENSG00000109320.11	NFKB1	32	chr4	102617099	102617117	+	APA	0.2084	0.0064724	0.20192	0.969	K2	1.4372	lengthening	distal
ENSG00000057294.14	PKP2	25	chr12	32790854	32791942	-	APA	0.57724	0.31249	0.26475	0.969	K2	1.5584	lengthening	distal
ENSG00000133818.13	RRAS2	12	chr11	14279103	14279109	-	APA	0.48536	0.10504	0.38032	0.969	K3	1.851	lengthening	distal
ENSG00000143494.15	VASH2	20	chr1	212988585	212988924	+	APA	0.20683	0.012973	0.19386	0.969	K2	1.5788	lengthening	distal
ENSG00000171163.15	ZNF692	35	chr1	248850066	248850281	-	APA	0.18847	0.065377	0.12309	0.969	K3	1.9991	lengthening	distal
ENSG00000205981.6	DNAJC19	22	chr3	180983773	180984274	-	APA	0.10453	0.0089375	0.095588	0.968	K2	1.3154	lengthening	distal
ENSG00000168675.18	LDLRAD4	22	chr18	13645713	13645777	+	APA	0.34998	0.077678	0.27231	0.968	K3	2.2746	lengthening	distal
ENSG00000075188.8	NUP37	17	chr12	102074245	102074467	-	APA	0.72831	0.53149	0.19682	0.968	K2	1.4031	lengthening	distal
ENSG00000205133.11	TRIQK	19	chr8	92886233	92886667	-	APA	0.17933	0.048948	0.13038	0.968	K3	2.4529	lengthening	proximal
ENSG00000077721.15	UBE2A	14	chrX	119583418	119583621	+	APA	0.18737	0.08674	0.10063	0.968	K3	1.6218	lengthening	distal
ENSG00000106603.18	COA1	25	chr7	43639257	43639448	-	APA	0.81189	0.97222	-0.16032	0.967	K2	0.9725	lengthening	proximal
ENSG00000115137.11	DNAJC27	12	chr2	24947359	24947748	-	APA	0.033197	0.20791	-0.17471	0.967	K1	0.9253	lengthening	proximal
ENSG00000215190.9	LINC00680	13	chr6	57946547	57947177	-	APA	0.008893	0.10544	-0.09655	0.967	K2	0.6639	lengthening	proximal
ENSG00000078142.12	PIK3C3	36	chr18	42081397	42081421	+	APA	0.30945	0.022206	0.28724	0.967	K2	1.3289	lengthening	distal
ENSG00000110583.12	NAA40	18	chr11	63954718	63957319	+	APA	0.5937	0.46973	0.12397	0.966	K3	1.0381	lengthening	distal
ENSG00000069974.15	RAB27A	12	chr15	55205349	55205352	-	APA	0.43833	0.0053915	0.43293	0.966	K2	1.5655	lengthening	distal
ENSG00000121481.10	RNF2	10	chr1	185100200	185101057	+	APA	0.5073	0.63069	-0.12339	0.966	K1	0.9999	lengthening	proximal
ENSG00000101236.16	RNF24	9	chr20	3933567	3934201	-	APA	0.39075	0.21753	0.17323	0.966	K2	1.5218	lengthening	distal
ENSG00000135912.10	TTLL4	35	chr2	218754231	218754503	+	APA	0.14146	0.012452	0.12901	0.966	K2	1.4346	lengthening	distal
ENSG00000168438.14	CDC40	19	chr6	110230334	110232215	+	APA	0.99706	0.89871	0.098347	0.965	K1	0.7988	lengthening	distal
ENSG00000163001.11	CFAP36	19	chr2	55545076	55545079	+	APA	0.24342	0.019683	0.22374	0.965	K2	0.96	lengthening	distal
ENSG00000139318.7	DUSP6	7	chr12	89347232	89348368	-	APA	0.40758	0.13693	0.27065	0.965	K2	0.9929	lengthening	distal
ENSG00000106683.14	LIMK1	24	chr7	74121302	74121458	+	APA	0.2746	0.08295	0.19165	0.965	K2	1.0022	lengthening	distal
ENSG00000107833.10	NPM3	7	chr10	101781332	101781632	-	APA	0.58543	0.99034	-0.40491	0.965	K1	0.9994	lengthening	proximal
ENSG00000164815.10	ORC5	20	chr7	104126343	104126837	-	APA	0.99331	0.68657	0.30674	0.965	K2	0.9544	lengthening	distal
ENSG00000182179.12	UBA7	47	chr3	49805207	49805223	-	APA	0.79109	0.18824	0.60284	0.965	K1	1	lengthening	distal
ENSG00000111727.11	HCFC2	17	chr12	104102959	104103407	+	APA	0.2517	0.0061235	0.24558	0.964	K2	1.4715	lengthening	distal
ENSG00000085274.15	MYNN	16	chr3	169787503	169787544	+	APA	0.45754	0.10058	0.35696	0.964	K2	1.5997	lengthening	distal
ENSG00000072864.14	NDE1	15	chr16	15724292	15726353	+	APA	0.8763	0.43035	0.44595	0.964	K1	0.9981	lengthening	distal
ENSG00000091073.19	DTX2	18	chr7	76482508	76482615	+	APA	0.030734	0.28114	-0.25041	0.963	K1	0.9988	lengthening	proximal
ENSG00000068745.14	IP6K2	27	chr3	48693785	48694050	-	APA	0.53729	0.40592	0.13138	0.963	K3	1.4817	lengthening	distal
ENSG00000178177.15	LCORL	8	chr4	17845497	17845901	-	APA	0.24759	0.4632	-0.21562	0.963	K1	0.9991	lengthening	proximal
ENSG00000103227.18	LMF1	26	chr16	853643	854499	-	APA	0.17516	0.013175	0.16199	0.963	K2	0.9434	lengthening	distal
ENSG00000072864.14	NDE1	14	chr16	15724191	15724291	+	APA	0.12307	0.57061	-0.44755	0.963	K1	0.9981	lengthening	proximal
ENSG00000152683.14	SLC30A6	22	chr2	32224100	32224112	+	APA	0.21331	0.0061788	0.20713	0.963	K3	1.5814	lengthening	distal
ENSG00000135541.20	AHI1	49	chr6	135284896	135285184	-	APA	0.1642	0.017931	0.14627	0.962	K3	1.9033	lengthening	distal
ENSG00000170017.12	ALCAM	29	chr3	105576862	105576900	+	APA	0.63033	0.41766	0.21267	0.962	K2	1.3654	lengthening	distal
ENSG00000104064.16	GABPB1	19	chr15	50285880	50285893	-	APA	0.63906	0.12234	0.51671	0.962	K1	0.9964	lengthening	distal
ENSG00000135297.15	MTO1	35	chr6	73501051	73501096	+	APA	0.44729	0.25253	0.19476	0.962	K3	1.9882	lengthening	distal
ENSG00000166136.15	NDUFB8	14	chr10	100523743	100523929	-	APA	0.61354	0.911	-0.29746	0.962	K1	0.9789	lengthening	proximal
ENSG00000166136.15	NDUFB8	15	chr10	100523740	100523742	-	APA	0.38631	0.089412	0.29689	0.962	K1	0.9789	lengthening	distal
ENSG00000177463.15	NR2C2	23	chr3	15043350	15049273	+	APA	0.83831	0.73449	0.10382	0.962	K2	0.8776	lengthening	distal
ENSG00000243207.6	PPAN-P2RY11	15	chr19	10113633	10114738	+	APA	0.0098239	0.43595	-0.42613	0.962	K1	0.9931	lengthening	proximal
ENSG00000090612.20	ZNF268	17	chr12	133202441	133202647	+	APA	0.13444	0.022151	0.11229	0.962	K3	2.4489	lengthening	distal
ENSG00000128271.21	ADORA2A	13	chr22	24440583	24441173	+	APA	0.13969	0.35903	-0.21935	0.961	K2	1.0984	lengthening	proximal
ENSG00000139318.7	DUSP6	6	chr12	89348369	89349071	-	APA	0.59011	0.86501	-0.2749	0.961	K2	0.9929	lengthening	proximal
ENSG00000139160.13	ETFBKMT	11	chr12	31668968	31673114	+	APA	0.94036	0.63014	0.31022	0.961	K2	1.2711	lengthening	distal
ENSG00000106290.14	TAF6	24	chr7	100107079	100107167	-	APA	0.47134	0.0052696	0.46607	0.961	K2	1.5643	lengthening	distal
ENSG00000113597.17	TRAPPC13	25	chr5	65664504	65664764	+	APA	0.47076	0.004783	0.46598	0.961	K2	1.0549	lengthening	distal
ENSG00000156261.12	CCT8	28	chr21	29056324	29056328	-	APA	0.18868	0.040693	0.14798	0.96	K2	1.3091	lengthening	distal
ENSG00000104064.16	GABPB1	18	chr15	50285894	50286067	-	APA	0.36013	0.87735	-0.51722	0.96	K1	0.9964	lengthening	proximal
ENSG00000126934.13	MAP2K2	17	chr19	4090324	4090708	-	APA	0.61405	0.87229	-0.25824	0.96	K1	0.9977	lengthening	proximal
ENSG00000130517.13	PGPEP1	16	chr19	18364219	18364342	+	APA	0.66459	0.48662	0.17796	0.96	K2	1.4373	lengthening	distal
ENSG00000272886.5	DCP1A	13	chr3	53287366	53287369	-	APA	0.21066	0.0022998	0.20836	0.959	K2	1.0569	lengthening	distal
ENSG00000165516.10	KLHDC2	22	chr14	49782830	49782918	+	APA	0.44653	0.59459	-0.14806	0.959	K2	1.1526	lengthening	proximal
ENSG00000186594.14	MIR22HG	10	chr17	1711971	1712268	-	APA	0.19981	0.38138	-0.18157	0.959	K2	1.5569	lengthening	proximal
ENSG00000110583.12	NAA40	17	chr11	63954676	63954717	+	APA	0.40052	0.52524	-0.12472	0.959	K3	1.0381	lengthening	proximal
ENSG00000100483.13	VCPKMT	13	chr14	50108642	50109536	-	APA	0.054149	0.36565	-0.3115	0.959	K2	1.7042	lengthening	proximal
ENSG00000137074.18	APTX	32	chr9	32972763	32973164	-	APA	0.38168	0.0083114	0.37337	0.958	K3	2.0905	lengthening	distal
ENSG00000188321.13	ZNF559	19	chr19	9342085	9342148	+	APA	0.015969	0.19063	-0.17467	0.958	K3	1.5964	lengthening	proximal
ENSG00000177674.15	AGTRAP	13	chr1	11750410	11750710	+	APA	0.15157	0.01541	0.13616	0.957	K3	1.5264	lengthening	distal
ENSG00000165102.14	HGSNAT	23	chr8	43199388	43199858	+	APA	0.11422	0.0042154	0.11001	0.957	K2	1.4928	lengthening	distal
ENSG00000214021.15	TTLL3	41	chr3	9835097	9835332	+	APA	0.40838	0.023971	0.38441	0.957	K3	1.7205	lengthening	distal
ENSG00000197857.13	ZNF44	13	chr19	12271812	12272328	-	APA	0.91685	0.69236	0.22449	0.957	K1	0.9844	lengthening	distal
ENSG00000188315.7	C3orf62	4	chr3	49268786	49271445	-	APA	0.016362	0.46058	-0.44421	0.956	K1	0.9903	lengthening	proximal
ENSG00000168438.14	CDC40	18	chr6	110229954	110230333	+	APA	0.0029956	0.10115	-0.098159	0.956	K1	0.7988	lengthening	proximal
ENSG00000163001.11	CFAP36	18	chr2	55544907	55545075	+	APA	0.75537	0.97658	-0.22121	0.956	K2	0.96	lengthening	proximal
ENSG00000205981.6	DNAJC19	21	chr3	180984275	180984277	-	APA	0.012774	0.43608	-0.4233	0.956	K2	1.3154	lengthening	proximal
ENSG00000115137.11	DNAJC27	13	chr2	24943636	24947358	-	APA	0.96685	0.79103	0.17582	0.956	K1	0.9253	lengthening	distal
ENSG00000213930.11	GALT	33	chr9	34650530	34650583	+	APA	0.20125	0.80519	-0.60394	0.956	K2	1.3779	lengthening	proximal
ENSG00000144674.16	GOLGA4	42	chr3	37366080	37366745	+	APA	0.51724	0.99673	-0.47949	0.956	K2	1.2464	lengthening	proximal
ENSG00000186594.14	MIR22HG	11	chr17	1711511	1711970	-	APA	0.75175	0.48772	0.26403	0.956	K2	1.5569	lengthening	distal
ENSG00000109685.17	NSD2	46	chr4	1978915	1978915	+	APA	0.37029	0.16669	0.2036	0.956	K3	2.2094	lengthening	distal
ENSG00000109501.13	WFS1	14	chr4	6300808	6302883	+	APA	0.28567	0.10591	0.17976	0.956	K2	1.2796	lengthening	distal
ENSG00000103540.16	CCP110	25	chr16	19553401	19553408	+	APA	0.47314	0.005835	0.4673	0.955	K2	1.3509	lengthening	distal
ENSG00000162419.12	GMEB1	16	chr1	28714874	28714886	+	APA	0.33921	0.0043297	0.33488	0.955	K2	1.5695	lengthening	distal
ENSG00000135709.12	KIAA0513	18	chr16	85088756	85094220	+	APA	0.85545	0.72075	0.1347	0.955	K2	1.1096	lengthening	distal
ENSG00000170234.12	PWWP2A	9	chr5	160077844	160077932	-	APA	0.44376	0.14233	0.30143	0.955	K2	1.4086	lengthening	distal
ENSG00000121481.10	RNF2	11	chr1	185101058	185102608	+	APA	0.4932	0.36876	0.12444	0.955	K1	0.9999	lengthening	distal
ENSG00000115234.10	SNX17	32	chr2	27377124	27377127	+	APA	0.94503	0.66301	0.28201	0.955	K2	1.2234	lengthening	distal
ENSG00000159210.9	SNF8	22	chr17	48930388	48930389	-	APA	0.54832	0.1015	0.44682	0.954	K2	1.414	lengthening	distal
ENSG00000164211.12	STARD4	16	chr5	111499402	111499584	-	APA	0.23956	0.013206	0.22635	0.954	K3	1.9711	lengthening	distal
ENSG00000182179.12	UBA7	46	chr3	49805224	49805437	-	APA	0.20697	0.80737	-0.6004	0.954	K1	1	lengthening	proximal
ENSG00000070761.7	CFAP20	12	chr16	58113588	58113959	-	APA	0.25054	0.11215	0.13839	0.953	K1	0.9013	lengthening	distal
ENSG00000170175.10	CHRNB1	22	chr17	7456927	7457329	+	APA	0.24788	0.12764	0.12025	0.952	K2	1.553	lengthening	distal
ENSG00000178202.12	KDELC2	11	chr11	108473075	108474952	-	APA	0.015307	0.12571	-0.1104	0.952	K2	0.8148	lengthening	proximal
ENSG00000100578.14	KIAA0586	41	chr14	58548046	58548054	+	APA	0.37317	0.018465	0.35471	0.952	K3	1.5976	lengthening	distal
ENSG00000169926.10	KLF13	4	chr15	31372183	31377899	+	APA	0.98032	0.84691	0.13341	0.952	K1	0.7929	lengthening	distal
ENSG00000141905.18	NFIC	18	chr19	3462901	3462907	+	APA	0.2136	0.10437	0.10923	0.952	K3	2.2927	lengthening	distal
ENSG00000046651.14	OFD1	30	chrX	13769174	13769311	+	APA	0.71086	0.20061	0.51026	0.952	K2	1.0122	lengthening	distal
ENSG00000100519.11	PSMC6	32	chr14	52727991	52727991	+	APA	0.27838	0.026588	0.25179	0.952	K3	1.7731	lengthening	distal
ENSG00000159210.9	SNF8	21	chr17	48930390	48930612	-	APA	0.34535	0.85987	-0.51452	0.952	K2	1.414	lengthening	proximal
ENSG00000143401.14	ANP32E	10	chr1	150220538	150220761	-	APA	0.13061	0.030608	0.10001	0.951	K2	1.889	lengthening	distal
ENSG00000140299.11	BNIP2	23	chr15	59663366	59663378	-	APA	0.23859	0.1254	0.11319	0.951	K3	1.5033	lengthening	distal
ENSG00000139160.13	ETFBKMT	8	chr12	31667647	31668075	+	APA	0.057653	0.34996	-0.29231	0.951	K2	1.2711	lengthening	proximal
ENSG00000168675.18	LDLRAD4	21	chr18	13645660	13645712	+	APA	0.013288	0.29537	-0.28208	0.951	K3	2.2746	lengthening	proximal
ENSG00000126934.13	MAP2K2	18	chr19	4090321	4090323	-	APA	0.38587	0.12802	0.25786	0.951	K1	0.9977	lengthening	distal
ENSG00000107833.10	NPM3	8	chr10	101781325	101781331	-	APA	0.41763	0.0097507	0.40788	0.951	K1	0.9994	lengthening	distal
ENSG00000109685.17	NSD2	44	chr4	1978638	1978902	+	APA	0.0070156	0.13635	-0.12933	0.951	K3	2.2094	lengthening	proximal
ENSG00000170142.11	UBE2E1	13	chr3	23891315	23891316	+	APA	0.29364	0.19485	0.098792	0.951	K1	0.9115	lengthening	distal
ENSG00000105287.12	PRKD2	31	chr19	46674508	46674735	-	APA	0.17034	0.32264	-0.15231	0.95	K3	1.0034	lengthening	proximal
ENSG00000118007.12	STAG1	44	chr3	136336233	136336235	-	APA	0.35342	0.04705	0.30637	0.95	K2	1.2139	lengthening	distal
ENSG00000105397.13	TYK2	34	chr19	10350533	10350852	-	APA	0.21899	0.089822	0.12917	0.95	K2	1.4745	lengthening	distal
ENSG00000170142.11	UBE2E1	12	chr3	23890509	23891314	+	APA	0.70634	0.8052	-0.098858	0.95	K1	0.9115	lengthening	proximal
ENSG00000197857.13	ZNF44	12	chr19	12272329	12272486	-	APA	0.084039	0.30764	-0.2236	0.95	K1	0.9844	lengthening	proximal
ENSG00000117262.18	GPR89A	29	chr1	145670185	145670460	+	APA	0.30513	0.0083825	0.29675	0.949	K3	1.7197	lengthening	distal
ENSG00000166987.14	MBD6	22	chr12	57530144	57530148	+	APA	0.44206	0.022768	0.41929	0.949	K1	0.984	lengthening	distal
ENSG00000175581.13	MRPL48	17	chr11	73864296	73864424	+	APA	0.25972	0.13904	0.12068	0.949	K3	1.648	lengthening	distal
ENSG00000104825.16	NFKBIB	11	chr19	38908731	38908886	+	APA	0.21468	0.57617	-0.36149	0.949	K1	0.9527	lengthening	proximal
ENSG00000166002.6	SMCO4	7	chr11	93479049	93479189	-	APA	0.28889	0.018799	0.27009	0.949	K2	1.3518	lengthening	distal
ENSG00000172046.18	USP19	39	chr3	49108131	49108528	-	APA	0.64165	0.82516	-0.18351	0.949	K2	0.9997	lengthening	proximal
ENSG00000111452.12	ADGRD1	36	chr12	131139289	131141247	+	APA	0.27824	0.030512	0.24773	0.948	K3	0.9952	lengthening	distal
ENSG00000198722.14	UNC13B	47	chr9	35405335	35405338	+	APA	0.45257	0.020833	0.43174	0.948	K2	0.9854	lengthening	distal
ENSG00000167775.10	CD320	13	chr19	8302127	8302316	-	APA	0.79156	0.57073	0.22083	0.947	K1	1	lengthening	distal
ENSG00000055163.19	CYFIP2	53	chr5	157392833	157393207	+	APA	0.015128	0.48586	-0.47073	0.947	K3	1.0299	lengthening	proximal
ENSG00000165516.10	KLHDC2	23	chr14	49782919	49783115	+	APA	0.52411	0.38032	0.1438	0.947	K2	1.1526	lengthening	distal
ENSG00000163235.15	TGFA	12	chr2	70450772	70450866	-	APA	0.76452	0.49072	0.2738	0.947	K2	1.418	lengthening	distal
ENSG00000128595.16	CALU	15	chr7	128771475	128771477	+	APA	0.42002	0.32068	0.09934	0.946	K2	1.6831	lengthening	distal
ENSG00000139926.15	FRMD6	28	chr14	51730460	51730727	+	APA	0.28652	0.17032	0.1162	0.946	K3	1.7972	lengthening	distal
ENSG00000197808.11	ZNF461	12	chr19	36638533	36638630	-	APA	0.3041	0.013858	0.29025	0.946	K3	1.7233	lengthening	distal
ENSG00000188321.13	ZNF559	20	chr19	9342149	9342465	+	APA	0.14391	0.01272	0.13119	0.946	K3	1.5964	lengthening	distal
ENSG00000144843.11	ADPRH	12	chr3	119588065	119588213	+	APA	0.019512	0.18297	-0.16346	0.945	K2	0.9069	lengthening	proximal
ENSG00000046651.14	OFD1	29	chrX	13769066	13769173	+	APA	0.28889	0.77299	-0.4841	0.945	K2	1.0122	lengthening	proximal
ENSG00000004139.13	SARM1	15	chr17	28398054	28398135	+	APA	0.026156	0.41357	-0.38742	0.945	K2	1.1644	lengthening	proximal
ENSG00000165406.15	MARC8	15	chr10	45457511	45458543	-	APA	0.22641	0.067563	0.15885	0.944	K2	1.0728	lengthening	distal
ENSG00000090372.14	STRN4	38	chr19	46719513	46720070	-	APA	0.95787	0.82706	0.13081	0.943	K2	0.9562	lengthening	distal
ENSG00000144843.11	ADPRH	13	chr3	119588214	119589945	+	APA	0.98093	0.81409	0.16684	0.942	K2	0.9069	lengthening	distal
ENSG00000123349.13	PFDN5	23	chr12	53299344	53299445	+	APA	0.2278	0.096736	0.13106	0.942	K2	1.5092	lengthening	distal
ENSG00000128595.16	CALU	14	chr7	128770577	128771474	+	APA	0.28681	0.38425	-0.097433	0.941	K2	1.6831	lengthening	proximal
ENSG00000109339.20	MAPK10	202	chr4	86016604	86016617	-	APA	0.34784	0.047506	0.30034	0.941	K6	1.4186	lengthening	distal
ENSG00000152944.8	MED21	5	chr12	27029486	27029749	+	APA	0.82855	0.7151	0.11345	0.941	K2	1.2052	lengthening	distal
ENSG00000055950.16	MRPL43	14	chr10	100986280	100986572	-	APA	0.58708	0.77107	-0.18399	0.941	K2	0.999	lengthening	proximal
ENSG00000055950.16	MRPL43	15	chr10	100986276	100986279	-	APA	0.41187	0.22972	0.18216	0.941	K2	0.999	lengthening	distal
ENSG00000167775.10	CD320	12	chr19	8302317	8302605	-	APA	0.20793	0.43117	-0.22324	0.94	K1	1	lengthening	proximal
ENSG00000115504.14	EHBP1	36	chr2	63045410	63045500	+	APA	0.19578	0.04671	0.14907	0.94	K3	1.5305	lengthening	distal
ENSG00000059691.11	GATB	25	chr4	151670838	151670848	-	APA	0.42247	0.017318	0.40515	0.94	K2	1.2105	lengthening	distal
ENSG00000168517.10	HEXIM2	11	chr17	45169381	45170035	+	APA	0.73686	0.53114	0.20571	0.94	K2	1.002	lengthening	distal
ENSG00000076770.14	MBNL3	19	chrX	132379203	132379203	-	APA	0.39972	0.28318	0.11654	0.94	K3	1.5592	lengthening	distal
ENSG00000105287.12	PRKD2	32	chr19	46674320	46674507	-	APA	0.81903	0.66858	0.15046	0.94	K3	1.0034	lengthening	distal
ENSG00000095539.15	SEMA4G	23	chr10	100984804	100985258	+	APA	0.26985	0.078338	0.19151	0.94	K2	1.2382	lengthening	distal
ENSG00000172046.18	USP19	40	chr3	49108050	49108130	-	APA	0.35818	0.17458	0.1836	0.94	K2	0.9997	lengthening	distal
ENSG00000164338.9	UTP15	17	chr5	73579877	73580199	+	APA	0.23087	0.066147	0.16472	0.94	K2	1.8457	lengthening	distal
ENSG00000010539.11	ZNF200	18	chr16	3223498	3223891	-	APA	0.0062409	0.2102	-0.20396	0.94	K3	1.6345	lengthening	proximal
ENSG00000139926.15	FRMD6	24	chr14	51728770	51728936	+	APA	0.29296	0.172	0.12096	0.939	K3	1.7972	lengthening	distal
ENSG00000135709.12	KIAA0513	17	chr16	85088276	85088755	+	APA	0.079149	0.22426	-0.14511	0.938	K2	1.1096	lengthening	proximal
ENSG00000033867.16	SLC4A7	36	chr3	27376606	27376763	-	APA	0.52764	0.29773	0.22991	0.938	K2	1.4608	lengthening	distal
ENSG00000120833.13	SOCS2	18	chr12	93575510	93576019	+	APA	0.45891	0.2697	0.18921	0.938	K2	1.1345	lengthening	distal
ENSG00000198598.6	MMP17	19	chr12	131851772	131851783	+	APA	0.34343	0.0055735	0.33786	0.937	K2	1.2482	lengthening	distal
ENSG00000196535.15	MYO18A	57	chr17	29073521	29074480	-	APA	0.19547	0.083424	0.11205	0.937	K3	1.5484	lengthening	distal
ENSG00000102078.15	SLC25A14	23	chrX	130373315	130373361	+	APA	0.97796	0.8057	0.17226	0.937	K2	0.9485	lengthening	distal
ENSG00000102078.15	SLC25A14	22	chrX	130372951	130373314	+	APA	0.021392	0.19446	-0.17306	0.936	K2	0.9485	lengthening	proximal
ENSG00000167671.11	UBXN6	24	chr19	4445007	4445009	-	APA	0.5425	0.0047067	0.53779	0.936	K2	1.0468	lengthening	distal
ENSG00000162585.16	FAAP20	34	chr1	2184478	2185174	-	APA	0.24759	0.80463	-0.55704	0.935	K2	0.9987	lengthening	proximal
ENSG00000108784.9	NAGLU	11	chr17	42543550	42544449	+	APA	0.94961	0.79558	0.15403	0.935	K1	0.9133	lengthening	distal
ENSG00000260565.6	ERVK13-1	10	chr16	2661149	2661195	-	APA	0.077321	0.34789	-0.27057	0.934	K2	1.8415	lengthening	proximal
ENSG00000169926.10	KLF13	3	chr15	31372010	31372182	+	APA	0.019731	0.1525	-0.13277	0.934	K1	0.7929	lengthening	proximal
ENSG00000139679.15	LPAR6	15	chr13	48411139	48411740	-	APA	0.80012	0.59453	0.2056	0.934	K2	1.3785	lengthening	distal
ENSG00000182004.12	SNRPE	12	chr1	203870082	203870084	+	APA	0.28185	0.13984	0.14201	0.934	K2	1.0336	lengthening	distal
ENSG00000166987.14	MBD6	21	chr12	57529934	57530143	+	APA	0.55802	0.97697	-0.41895	0.933	K1	0.984	lengthening	proximal
ENSG00000128271.21	ADORA2A	14	chr22	24441174	24442356	+	APA	0.83609	0.6213	0.21479	0.932	K2	1.0984	lengthening	distal
ENSG00000221838.9	AP4M1	28	chr7	100107180	100109039	+	APA	0.91037	0.69197	0.21839	0.932	K2	0.9364	lengthening	distal
ENSG00000151552.11	QDPR	13	chr4	17486527	17486799	-	APA	0.58718	0.24495	0.34223	0.932	K2	0.9957	lengthening	distal
ENSG00000092421.16	SEMA6A	32	chr5	116445750	116446133	-	APA	0.23561	0.080152	0.15545	0.932	K3	1.8515	lengthening	distal
ENSG00000039123.15	SKIV2L2	33	chr5	55424986	55425106	+	APA	0.17618	0.053129	0.12305	0.932	K2	1.5276	lengthening	distal
ENSG00000179750.15	APOBEC3B	14	chr22	38992547	38992761	+	APA	0.16596	0.44201	-0.27605	0.931	K2	1.5246	lengthening	proximal
ENSG00000204116.11	CHIC1	10	chrX	73683216	73684411	+	APA	0.078607	0.28028	-0.20167	0.931	K2	1.3614	lengthening	proximal
ENSG00000085274.15	MYNN	15	chr3	169786416	169787502	+	APA	0.23446	0.608	-0.37354	0.931	K2	1.5997	lengthening	proximal
ENSG00000048162.20	NOP16	15	chr5	176383981	176384283	-	APA	0.15777	0.27909	-0.12132	0.931	K1	0.9584	lengthening	proximal
ENSG00000125637.15	PSD4	29	chr2	113201567	113202912	+	APA	0.64056	0.5358	0.10476	0.931	K2	1.6146	lengthening	distal
ENSG00000101115.12	SALL4	10	chr20	51784046	51784264	-	APA	0.51116	0.35921	0.15194	0.931	K2	1.3522	lengthening	distal
ENSG00000167711.13	SERPINF2	12	chr17	1754122	1754642	+	APA	0.14005	0.41781	-0.27777	0.931	K1	0.9988	lengthening	proximal
ENSG00000265148.5	TSPOAP1-AS1	17	chr17	58352492	58353286	+	APA	0.21755	0.046547	0.171	0.931	K3	1.7512	lengthening	distal
ENSG00000260565.6	ERVK13-1	11	chr16	2660350	2661148	-	APA	0.77067	0.47362	0.29705	0.93	K2	1.8415	lengthening	distal
ENSG00000120093.11	HOXB3	20	chr17	48548870	48549811	-	APA	0.76494	0.4077	0.35724	0.93	K3	1.4457	lengthening	distal
ENSG00000099949.18	LZTR1	30	chr22	20997232	20998121	+	APA	0.014814	0.14744	-0.13262	0.93	K2	0.9271	lengthening	proximal
ENSG00000048162.20	NOP16	16	chr5	176383946	176383980	-	APA	0.84193	0.72074	0.12119	0.93	K1	0.9584	lengthening	distal
ENSG00000170017.12	ALCAM	28	chr3	105575915	105576861	+	APA	0.35681	0.54911	-0.1923	0.929	K2	1.3654	lengthening	proximal
ENSG00000172270.18	BSG	23	chr19	583431	583487	+	APA	0.57039	0.47198	0.098404	0.929	K3	1.3399	lengthening	distal
ENSG00000164808.16	SPIDR	49	chr8	47736000	47736306	+	APA	0.16912	0.058132	0.11099	0.929	K4	1.8691	lengthening	distal
ENSG00000123473.15	STIL	31	chr1	47250622	47251922	-	APA	0.57667	0.47462	0.10205	0.929	K2	1.1996	lengthening	distal
ENSG00000184012.11	TMPRSS2	25	chr21	41465890	41466008	-	APA	0.15486	0.053988	0.10087	0.929	K2	1.656	lengthening	distal
ENSG00000158467.16	AHCYL2	25	chr7	129427221	129430211	+	APA	0.75465	0.44039	0.31425	0.928	K2	1.4833	lengthening	distal
ENSG00000242110.7	AMACR	19	chr5	33986178	33987173	-	APA	0.1743	0.047801	0.1265	0.928	K2	1.4974	lengthening	distal
ENSG00000145819.15	ARHGAP26	28	chr5	143222358	143223194	+	APA	0.70605	0.46952	0.23653	0.928	K2	1.5709	lengthening	distal
ENSG00000162585.16	FAAP20	35	chr1	2184464	2184477	-	APA	0.75413	0.19566	0.55847	0.928	K2	0.9987	lengthening	distal
ENSG00000100578.14	KIAA0586	40	chr14	58548024	58548045	+	APA	0.29598	0.68636	-0.39038	0.928	K3	1.5976	lengthening	proximal
ENSG00000164211.12	STARD4	15	chr5	111499585	111499881	-	APA	0.011723	0.20046	-0.18874	0.928	K3	1.9711	lengthening	proximal
ENSG00000132256.18	TRIM5	19	chr11	5663564	5663616	-	APA	0.24656	0.058173	0.18839	0.928	K2	0.9851	lengthening	distal
ENSG00000178896.8	EXOSC4	4	chr8	144080242	144080579	+	APA	0.36735	0.47914	-0.11179	0.927	K1	1	lengthening	proximal
ENSG00000106330.11	MOSPD3	11	chr7	100615152	100615326	+	APA	0.449	0.68768	-0.23868	0.927	K1	0.9989	lengthening	proximal
ENSG00000104825.16	NFKBIB	12	chr19	38908887	38908893	+	APA	0.78502	0.42798	0.35704	0.927	K1	0.9527	lengthening	distal
ENSG00000167711.13	SERPINF2	13	chr17	1754643	1755268	+	APA	0.86241	0.58237	0.28004	0.927	K1	0.9988	lengthening	distal
ENSG00000171634.16	BPTF	46	chr17	67982552	67982569	+	APA	0.44408	0.28491	0.15916	0.926	K3	1.6971	lengthening	distal
ENSG00000088305.18	DNMT3B	29	chr20	32808281	32809356	+	APA	0.83607	0.70746	0.12862	0.926	K2	1.2175	lengthening	distal
ENSG00000164970.14	FAM219A	10	chr9	34401013	34401119	-	APA	0.46493	0.18033	0.28459	0.926	K2	1.8271	lengthening	distal
ENSG00000173065.13	FAM222B	16	chr17	28757390	28759240	-	APA	0.20205	0.0376	0.16445	0.926	K3	1.7047	lengthening	distal
ENSG00000164941.13	INTS8	36	chr8	94880118	94880314	+	APA	0.21008	0.030126	0.17995	0.926	K2	1.169	lengthening	distal
ENSG00000104783.11	KCNN4	15	chr19	43766822	43767089	-	APA	0.011851	0.10721	-0.095354	0.926	K1	0.7643	lengthening	proximal
ENSG00000136802.11	LRRC8A	6	chr9	128916096	128918034	+	APA	0.039746	0.57396	-0.53422	0.926	K2	0.8269	lengthening	proximal
ENSG00000244005.12	NFS1	21	chr20	35669471	35669685	-	APA	0.036971	0.15179	-0.11482	0.926	K2	0.8338	lengthening	proximal
ENSG00000101654.17	RNMT	23	chr18	13762039	13762344	+	APA	0.13916	0.023868	0.11529	0.926	K2	1.7752	lengthening	distal
ENSG00000221838.9	AP4M1	27	chr7	100107149	100107179	+	APA	0.089134	0.3065	-0.21737	0.925	K2	0.9364	lengthening	proximal
ENSG00000078061.12	ARAF	23	chrX	47571901	47571920	+	APA	0.62429	0.49763	0.12665	0.925	K1	1	lengthening	distal
ENSG00000162174.12	ASRGL1	20	chr11	62392569	62392585	+	APA	0.040441	0.21863	-0.17819	0.925	K2	1.0815	lengthening	proximal
ENSG00000188315.7	C3orf62	5	chr3	49268602	49268785	-	APA	0.98397	0.53788	0.44609	0.925	K1	0.9903	lengthening	distal
ENSG00000006634.7	DBF4	24	chr7	87907387	87908373	+	APA	0.68132	0.58605	0.095272	0.925	K3	1.1206	lengthening	distal
ENSG00000106330.11	MOSPD3	12	chr7	100615327	100615384	+	APA	0.54617	0.31336	0.23282	0.925	K1	0.9989	lengthening	distal
ENSG00000104490.17	NCALD	17	chr8	101686727	101687894	-	APA	0.92127	0.69568	0.22559	0.925	K2	1.1086	lengthening	distal
ENSG00000182004.12	SNRPE	11	chr1	203870052	203870081	+	APA	0.70884	0.85058	-0.14174	0.925	K2	1.0336	lengthening	proximal
ENSG00000092929.11	UNC13D	41	chr17	75827225	75827263	-	APA	0.49971	0.22812	0.27159	0.925	K1	0.9888	lengthening	distal
ENSG00000078124.11	ACER3	32	chr11	77020601	77020700	+	APA	0.20625	0.053868	0.15238	0.924	K3	2.4566	lengthening	distal
ENSG00000153046.17	CDYL	15	chr6	4953898	4954256	+	APA	0.20787	0.067889	0.13998	0.924	K3	1.7937	lengthening	distal
ENSG00000166509.10	CLEC3A	4	chr16	78030447	78030951	+	APA	0.17239	0.058946	0.11344	0.924	K1	0.7771	lengthening	distal
ENSG00000004779.9	NDUFAB1	9	chr16	23581002	23581013	-	APA	0.2374	0.10126	0.13613	0.924	K1	0.861	lengthening	distal
ENSG00000226137.5	BAIAP2-AS1	4	chr17	81029702	81033398	-	APA	0.24626	0.43232	-0.18605	0.923	K1	0.989	lengthening	proximal
ENSG00000103540.16	CCP110	24	chr16	19551478	19553400	+	APA	0.29778	0.82623	-0.52845	0.923	K2	1.3509	lengthening	proximal
ENSG00000187790.10	FANCM	33	chr14	45199972	45200028	+	APA	0.57294	0.23355	0.33938	0.923	K3	1.6018	lengthening	distal
ENSG00000071242.11	RPS6KA2	29	chr6	166412659	166412747	-	APA	0.33411	0.076449	0.25766	0.923	K3	1.4433	lengthening	distal
ENSG00000135090.13	TAOK3	34	chr12	118149801	118150908	-	APA	0.67266	0.5159	0.15676	0.923	K2	1.4491	lengthening	distal
ENSG00000111665.11	CDCA3	24	chr12	6844799	6844858	-	APA	0.98653	0.5095	0.47702	0.922	K2	0.8993	lengthening	distal
ENSG00000102158.19	MAGT1	18	chrX	77826364	77826366	-	APA	0.50831	0.16327	0.34504	0.922	K2	0.9162	lengthening	distal
ENSG00000125912.10	NCLN	22	chr19	3209571	3209575	+	APA	0.63079	0.35608	0.27472	0.922	K1	0.9902	lengthening	distal
ENSG00000172057.9	ORMDL3	10	chr17	39922550	39922685	-	APA	0.39975	0.28518	0.11457	0.922	K2	1.5395	lengthening	distal
ENSG00000089737.16	DDX24	20	chr14	94050923	94050937	-	APA	0.5068	0.39965	0.10715	0.921	K3	1.6108	lengthening	distal
ENSG00000178202.12	KDELC2	12	chr11	108472112	108473074	-	APA	0.96321	0.85554	0.10767	0.921	K2	0.8148	lengthening	distal
ENSG00000138496.16	PARP9	19	chr3	122528005	122528743	-	APA	0.42935	0.20496	0.2244	0.921	K2	1.6412	lengthening	distal
ENSG00000116521.10	SCAMP3	15	chr1	155255981	155256240	-	APA	0.53417	0.81963	-0.28546	0.921	K2	1.5633	lengthening	proximal
ENSG00000173465.7	SSSCA1	8	chr11	65571769	65571770	+	APA	0.35144	0.0028212	0.34862	0.921	K2	0.9281	lengthening	distal
ENSG00000111678.10	C12orf57	14	chr12	6945997	6946002	+	APA	0.29898	0.055699	0.24328	0.919	K2	0.9823	lengthening	distal
ENSG00000251669.5	FAM86EP	14	chr4	3942911	3943273	-	APA	0.4218	0.15004	0.27176	0.919	K2	1.5588	lengthening	distal
ENSG00000001631.15	KRIT1	36	chr7	92200358	92200372	-	APA	0.4901	0.22075	0.26935	0.919	K3	1.7938	lengthening	distal
ENSG00000251350.1	LINC02475	5	chr4	44020257	44022063	+	APA	0.78292	0.51809	0.26483	0.919	K1	0.9997	lengthening	distal
ENSG00000104490.17	NCALD	15	chr8	101688105	101688477	-	APA	0.079917	0.29651	-0.2166	0.919	K2	1.1086	lengthening	proximal
ENSG00000078900.14	TP73	23	chr1	3733293	3733367	+	APA	0.37452	0.12274	0.25178	0.919	K2	1.5841	lengthening	distal
ENSG00000162664.16	ZNF326	19	chr1	90028227	90028538	+	APA	0.36617	0.25517	0.111	0.919	K2	1.1948	lengthening	distal
ENSG00000242110.7	AMACR	18	chr5	33987174	33988083	-	APA	0.53462	0.31306	0.22156	0.918	K2	1.4974	lengthening	medium
ENSG00000102158.19	MAGT1	17	chrX	77826367	77827460	-	APA	0.49204	0.83662	-0.34458	0.918	K2	0.9162	lengthening	proximal
ENSG00000135913.10	USP37	34	chr2	218453501	218454814	-	APA	0.20605	0.050762	0.15529	0.918	K2	1.8444	lengthening	distal
ENSG00000114859.15	CLCN2	35	chr3	184346398	184346519	-	APA	0.44397	0.1485	0.29547	0.917	K3	1.8024	lengthening	distal
ENSG00000251350.1	LINC02475	4	chr4	44019751	44020256	+	APA	0.21852	0.47987	-0.26135	0.917	K1	0.9997	lengthening	proximal
ENSG00000125247.15	TMTC4	30	chr13	100603934	100604870	-	APA	0.80151	0.36755	0.43396	0.917	K2	1.0001	lengthening	distal
ENSG00000111452.12	ADGRD1	35	chr12	131139264	131139288	+	APA	0.42785	0.062829	0.36502	0.916	K3	0.9952	lengthening	distal
ENSG00000108784.9	NAGLU	10	chr17	42543084	42543549	+	APA	0.050377	0.2043	-0.15392	0.916	K1	0.9133	lengthening	proximal
ENSG00000103056.11	SMPD3	18	chr16	68361127	68361133	-	APA	0.043841	0.47623	-0.43239	0.916	K2	0.9177	lengthening	proximal
ENSG00000109689.15	STIM2	21	chr4	27022519	27022996	+	APA	0.17043	0.042714	0.12772	0.916	K2	1.7971	lengthening	distal
ENSG00000153558.13	FBXL2	31	chr3	33385763	33385862	+	APA	0.36226	0.084933	0.27733	0.915	K3	1.6303	lengthening	distal
ENSG00000004779.9	NDUFAB1	8	chr16	23581014	23581173	-	APA	0.7626	0.89897	-0.13637	0.915	K1	0.861	lengthening	proximal
ENSG00000066117.14	SMARCD1	21	chr12	50099098	50099246	+	APA	0.36125	0.24933	0.11192	0.915	K2	1.2756	lengthening	distal
ENSG00000162384.13	C1orf123	21	chr1	53214099	53214136	-	APA	0.26002	0.093161	0.16686	0.914	K2	1.5627	lengthening	distal
ENSG00000130299.16	GTPBP3	25	chr19	17341632	17341664	+	APA	0.25707	0.10236	0.15471	0.914	K3	2.0985	lengthening	distal
ENSG00000100109.16	TFIP11	24	chr22	26491225	26491926	-	APA	0.6271	0.48676	0.14034	0.914	K1	0.9999	lengthening	distal
ENSG00000226137.5	BAIAP2-AS1	5	chr17	81029130	81029701	-	APA	0.75368	0.56799	0.18569	0.913	K1	0.989	lengthening	distal
ENSG00000108578.14	BLMH	20	chr17	30248205	30248821	-	APA	0.91642	0.68799	0.22842	0.913	K2	1.0794	lengthening	distal
ENSG00000055147.18	FAM114A2	24	chr5	153992714	153992954	-	APA	0.15456	0.026913	0.12764	0.913	K3	1.8047	lengthening	distal
ENSG00000163738.18	MTHFD2L	11	chr4	74160089	74160514	+	APA	0.37873	0.16885	0.20988	0.913	K1	0.9929	lengthening	distal
ENSG00000151503.12	NCAPD3	45	chr11	134152847	134153052	-	APA	0.26565	0.11275	0.1529	0.913	K2	0.9452	lengthening	distal
ENSG00000225484.6	NUTM2B-AS1	13	chr10	79762710	79766052	-	APA	0.70026	0.26739	0.43287	0.913	K1	0.994	lengthening	distal
ENSG00000002330.13	BAD	8	chr11	64269834	64270268	-	APA	0.41983	0.1333	0.28653	0.912	K2	1.5168	lengthening	distal
ENSG00000133134.11	BEX2	7	chrX	103309502	103309981	-	APA	0.197	0.021052	0.17595	0.912	K2	0.9577	lengthening	distal
ENSG00000186162.10	CIDECP	8	chr3	10017497	10017752	-	APA	0.29028	0.031989	0.25829	0.912	K2	1.5555	lengthening	distal
ENSG00000160767.20	FAM189B	28	chr1	155247205	155247216	-	APA	0.15362	0.023693	0.12992	0.912	K2	1.3109	lengthening	distal
ENSG00000104365.13	IKBKB	54	chr8	42331911	42332450	+	APA	0.32675	0.16081	0.16594	0.912	K4	2.3402	lengthening	distal
ENSG00000089693.10	MLF2	17	chr12	6748004	6748547	-	APA	0.43114	0.68209	-0.25095	0.912	K1	0.9918	lengthening	proximal
ENSG00000125912.10	NCLN	21	chr19	3209478	3209570	+	APA	0.37628	0.64202	-0.26574	0.912	K1	0.9902	lengthening	proximal
ENSG00000138835.22	RGS3	28	chr9	113541320	113541594	+	APA	0.14781	0.030385	0.11743	0.912	K2	0.7974	lengthening	distal
ENSG00000111678.10	C12orf57	13	chr12	6945771	6945996	+	APA	0.70209	0.9447	-0.24261	0.911	K2	0.9823	lengthening	proximal
ENSG00000144401.14	METTL21A	11	chr2	207612980	207613443	-	APA	0.14056	0.0024841	0.13807	0.911	K3	1.7461	lengthening	distal
ENSG00000130517.13	PGPEP1	14	chr19	18363431	18363998	+	APA	0.33511	0.47073	-0.13562	0.911	K2	1.4373	lengthening	proximal
ENSG00000160310.17	PRMT2	29	chr21	46664295	46664473	+	APA	0.15617	0.039812	0.11636	0.911	K2	0.9975	lengthening	distal
ENSG00000118007.12	STAG1	43	chr3	136336236	136337387	-	APA	0.12784	0.41195	-0.28411	0.911	K2	1.2139	lengthening	proximal
ENSG00000150627.15	WDR17	35	chr4	176179770	176180159	+	APA	0.3743	0.19432	0.17998	0.911	K2	1.5335	lengthening	distal
ENSG00000119725.18	ZNF410	33	chr14	73931818	73931840	+	APA	0.51885	0.42102	0.09783	0.91	K3	1.6184	lengthening	distal
ENSG00000115221.10	ITGB6	28	chr2	160099666	160101635	-	APA	0.5037	0.29417	0.20953	0.909	K2	1.5302	lengthening	distal
ENSG00000104783.11	KCNN4	16	chr19	43766533	43766821	-	APA	0.98837	0.89185	0.09652	0.909	K1	0.7643	lengthening	distal
ENSG00000197119.12	SLC25A29	21	chr14	100292735	100292780	-	APA	0.1758	0.057814	0.11798	0.909	K3	1.5375	lengthening	distal
ENSG00000119787.13	ATL2	21	chr2	38295901	38295907	-	APA	0.42802	0.31475	0.11326	0.908	K2	1.1535	lengthening	distal
ENSG00000104081.13	BMF	12	chr15	40087893	40091717	-	APA	0.45037	0.27236	0.17801	0.908	K2	1.8643	lengthening	distal
ENSG00000100814.17	CCNB1IP1	15	chr14	20311370	20311428	-	APA	0.57514	0.39474	0.1804	0.908	K2	0.9989	lengthening	distal
ENSG00000196535.15	MYO18A	55	chr17	29074829	29074914	-	APA	0.60093	0.72023	-0.1193	0.908	K3	1.5484	lengthening	proximal
ENSG00000039319.16	ZFYVE16	35	chr5	80479141	80479153	+	APA	0.45712	0.22149	0.23563	0.908	K3	1.6358	lengthening	distal
ENSG00000012822.15	CALCOCO1	37	chr12	53711159	53711789	-	APA	0.65887	0.44249	0.21638	0.907	K2	1.5223	lengthening	distal
ENSG00000178896.8	EXOSC4	5	chr8	144080580	144080647	+	APA	0.63309	0.51923	0.11386	0.907	K1	1	lengthening	distal
ENSG00000116299.16	KIAA1324	35	chr1	109203106	109203123	+	APA	0.60637	0.45585	0.15052	0.907	K2	1.2993	lengthening	distal
ENSG00000115648.13	MLPH	32	chr2	237553992	237553993	+	APA	0.19755	0.017352	0.18019	0.907	K3	1.607	lengthening	distal
ENSG00000007341.18	ST7L	40	chr1	112523518	112525281	-	APA	0.9733	0.79008	0.18322	0.907	K2	1.3674	lengthening	distal
ENSG00000102871.15	TRADD	14	chr16	67154199	67154832	-	APA	0.79809	0.62594	0.17215	0.907	K2	1.1388	lengthening	distal
ENSG00000259248.5	USP3-AS1	12	chr15	63587934	63588828	-	APA	0.53851	0.023505	0.515	0.907	K2	0.9916	lengthening	distal
ENSG00000184220.11	CMSS1	18	chr3	100178600	100178603	+	APA	0.29978	0.14174	0.15805	0.906	K2	0.9539	lengthening	distal
ENSG00000099949.18	LZTR1	31	chr22	20998122	20999032	+	APA	0.97997	0.84848	0.13149	0.906	K2	0.9271	lengthening	distal
ENSG00000172965.14	MIR4435-2HG	10	chr2	111429322	111429620	-	APA	0.81573	0.55123	0.26449	0.906	K2	1.4315	lengthening	distal
ENSG00000089693.10	MLF2	18	chr12	6747996	6748003	-	APA	0.56891	0.31805	0.25086	0.906	K1	0.9918	lengthening	distal
ENSG00000100814.17	CCNB1IP1	14	chr14	20311429	20311752	-	APA	0.42509	0.6056	-0.18051	0.905	K2	0.9989	lengthening	proximal
ENSG00000110172.11	CHORDC1	19	chr11	90201949	90202551	-	APA	0.20996	0.074393	0.13556	0.905	K2	1.2792	lengthening	distal
ENSG00000100246.12	DNAL4	7	chr22	38778853	38779613	-	APA	0.0241	0.12307	-0.098968	0.905	K1	0.7106	lengthening	proximal
ENSG00000165795.23	NDRG2	66	chr14	21016851	21017220	-	APA	0.2802	0.67279	-0.39258	0.905	K3	2.1041	lengthening	proximal
ENSG00000149489.8	ROM1	4	chr11	62614621	62615100	+	APA	0.61416	0.16346	0.45069	0.905	K1	0.9649	lengthening	distal
ENSG00000075336.11	TIMM21	12	chr18	74158376	74158476	+	APA	0.3953	0.21178	0.18352	0.905	K2	1.0401	lengthening	distal
ENSG00000157426.13	AASDH	24	chr4	56338605	56338791	-	APA	0.15331	0.031434	0.12187	0.904	K2	0.7186	lengthening	distal
ENSG00000078061.12	ARAF	22	chrX	47571323	47571900	+	APA	0.37567	0.50182	-0.12615	0.904	K1	1	lengthening	proximal
ENSG00000154640.14	BTG3	10	chr21	17594090	17594332	-	APA	0.43283	0.14147	0.29136	0.904	K1	0.998	lengthening	distal
ENSG00000153558.13	FBXL2	32	chr3	33385863	33385948	+	APA	0.21472	0.031831	0.18289	0.904	K3	1.6303	lengthening	distal
ENSG00000128573.24	FOXP2	44	chr7	114689958	114690100	+	APA	0.46004	0.18914	0.2709	0.904	K3	1.9733	lengthening	distal
ENSG00000078900.14	TP73	21	chr1	3732747	3733091	+	APA	0.017712	0.36856	-0.35084	0.904	K2	1.5841	lengthening	proximal
ENSG00000162664.16	ZNF326	18	chr1	90027354	90028226	+	APA	0.59283	0.70813	-0.1153	0.904	K2	1.1948	lengthening	proximal
ENSG00000184220.11	CMSS1	17	chr3	100178305	100178599	+	APA	0.69632	0.85347	-0.15715	0.903	K2	0.9539	lengthening	proximal
ENSG00000184014.7	DENND5A	34	chr11	9139504	9139854	-	APA	0.56627	0.44371	0.12256	0.903	K2	1.5731	lengthening	distal
ENSG00000100246.12	DNAL4	8	chr22	38778508	38778852	-	APA	0.97577	0.87697	0.098798	0.903	K1	0.7106	lengthening	distal
ENSG00000163281.11	GNPDA2	12	chr4	44706412	44707751	-	APA	0.33545	0.067386	0.26807	0.903	K1	0.9963	lengthening	distal
ENSG00000168591.15	TMUB2	26	chr17	44191699	44191712	+	APA	0.48158	0.18569	0.29589	0.903	K3	1.9878	lengthening	distal
ENSG00000003402.19	CFLAR	24	chr2	201136415	201139877	+	APA	0.46872	0.27286	0.19586	0.902	K2	1.5522	lengthening	distal
ENSG00000175390.13	EIF3F	26	chr11	7995945	7996018	+	APA	0.68254	0.78694	-0.10439	0.902	K2	1.4057	lengthening	proximal
ENSG00000164306.10	PRIMPOL	24	chr4	184694522	184694758	+	APA	0.44578	0.16241	0.28337	0.902	K2	0.9866	lengthening	distal
ENSG00000116954.7	RRAGC	8	chr1	38839349	38839704	-	APA	0.16825	0.060104	0.10815	0.902	K1	0.8499	lengthening	distal
ENSG00000163156.11	SCNM1	17	chr1	151168986	151169111	+	APA	0.20515	0.017986	0.18716	0.902	K2	1.0019	lengthening	distal
ENSG00000103056.11	SMPD3	19	chr16	68358325	68361126	-	APA	0.95597	0.52477	0.4312	0.902	K2	0.9177	lengthening	distal
ENSG00000137449.15	CPEB2	14	chr4	15066153	15066626	+	APA	0.29763	0.13771	0.15992	0.901	K1	0.9456	lengthening	distal
ENSG00000104812.14	GYS1	19	chr19	48968125	48968129	-	APA	0.35485	0.11643	0.23842	0.901	K1	0.982	lengthening	distal
ENSG00000278318.4	ZNF229	10	chr19	44426708	44430542	-	APA	0.46133	0.23677	0.22456	0.901	K2	1.4525	lengthening	distal
ENSG00000179409.10	GEMIN4	10	chr17	744623	746630	-	APA	0.72185	0.57415	0.1477	0.9	K2	1.743	lengthening	distal
ENSG00000004139.13	SARM1	16	chr17	28398136	28398163	+	APA	0.89964	0.53638	0.36326	0.9	K2	1.1644	lengthening	distal
ENSG00000010539.11	ZNF200	19	chr16	3223336	3223497	-	APA	0.66656	0.43063	0.23594	0.9	K3	1.6345	lengthening	distal
