# Supplementary material
Source: Preprints.org preprint supplement (doi:10.20944/preprints202004.0323.v1)
Supplement: Supplementary file 1 [file supplementary › Supplementary_Table_13_Primer_used_for_the_analysis.xlsx]

## Sheet: Sheet1
Custom designed primers
DSCAM-AS1	Fwd: 5'-GATCCTTGTTTGGTCTCACTCC-3'
	Rev: 5'-ATGCCTATGTGGGTGATTGG-3'
DSCAM-AS1_cytoplasmic	Fwd: 5'-TTCTCAGCACGTTTTTGCAG-3'
	Rev: 5'-CCGATCCGTCGTCCATCTC-3'
DSCAM-AS1_nuclear	Fwd: 5'-TTCTCAGCACGTTTTTGCAG-3'
	Rev: 5'-CCGATCCGTCGTCCATCTC-3'
MAGI1	Fwd: 5'-CATCGACAGCTGCAAGGAG-3'
	Rev: 5'-AATGTCGCAGGTCCTTGTTC-3'
IDS	Fwd: 5'-GCTGGTCTTTTCCACCTTATCA-3'
	Rev: 5'-AAGCAGGTTGGCATGGAGT-3'
HNRNPL	Fwd: 5'-TTCTGCTTATATGGCAATGTGG-3'
	Rev: 5'-GACTGACCAGGCATGATGG-3'
Primers purchased from Qiagen
PAXBP1	QT00073087 Hs_PAXBP1_1_SG QuantiTect Primer Assay
EPHA6	QT00029526 Hs_EPHA6_1_SG QuantiTect Primer Assay
PLCB1	QT00038689 Hs_PLCB1_1_SG QuantiTect Primer Assay
SPIDR	QT00058842 Hs_SPIDR_1_SG QuantiTect Primer Assay
ALDH3B2	QT00015141 Hs_ALDH3B2_1_SG QuantiTect Primer Assay
MUC1	QT00015379 Hs_MUC1_1_SG QuantiTect Primer Assay
BASP1	QT00028070 Hs_BASP1_1_SG QuantiTect Primer Assay
18S	QT00199367 Hs_RRN18S_1_SG QuantiTect Primer Assay
