# Supplementary material
Source: Preprints.org preprint supplement (doi:10.20944/preprints202004.0323.v1)
Supplement: Supplementary file 1 [file supplementary › Supplementary_Table_14_WB_densitometry_readings_and_intensity_ratio_calculation.xlsx]

## Sheet: Sheet1
GAPDH		densiometry reading	normalization on background
1	1_LNA_CTRL	85143.8	80309.6	LNA_CTRL
2	1_LNA_DSCAM-AS1	84532	79697.7	LNA_DS1
3	2_LNA_CTRL	234663	229829
4	2_LNA_DSCAM-AS1	251053	246218
5	3_LNA_CTRL	180402	175568
6	3_LNA_DSCAM-AS1	207157	202323
	background	4834.28	0
hnRNPL		densiometry reading	normalization on background		hnRNPL normalization on GAPDH		average	standard error
1	1_LNA_CTRL	314230	309396		3.85254	1_LNA_CTRL	2.69879	0.340028	LNA_CTR
2	1_LNA_DSCAM-AS1	264794	259959		3.26182	1_LNA_DSCAM-AS1	2.41506	0.247522	LNA_DSCAM-AS1
3	2_LNA_CTRL	445292	440457		1.91646	2_LNA_CTRL
4	2_LNA_DSCAM-AS1	466451	461617		1.87483	2_LNA_DSCAM-AS1
5	3_LNA_CTRL	413444	408609		2.32735	3_LNA_CTRL
6	3_LNA_DSCAM-AS1	431438	426603		2.10852	3_LNA_DSCAM-AS1
	background	4834.28
BKG_3-5		21677.3				0
