# Supplementary material
Source: Preprints.org preprint supplement (doi:10.20944/preprints202004.0323.v1)
Supplement: Supplementary file 1 [file supplementary › Uncropped_WB_images.pdf]

A) hnRNPL

Uncropped image of markers

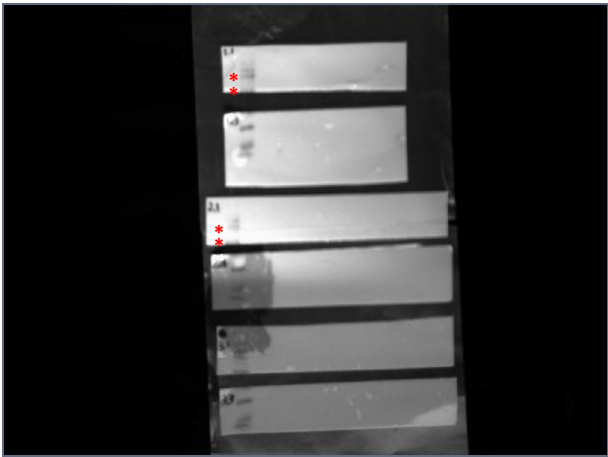

Red stars indicate the bands of the molecular marker at 75 KDa (upper) and 50 KDa (lower)

Uncropped image of hnRNPL

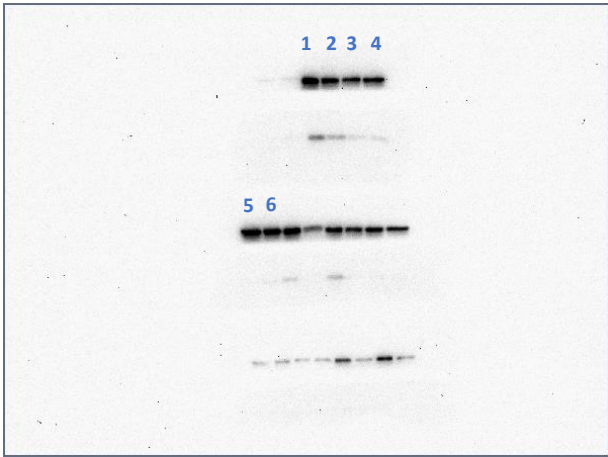

Blue numbers indicate the analyzed bands for hnRNPL protein quantification (predicted MW 68KDa)

B) GAPDH

Uncropped image of markers

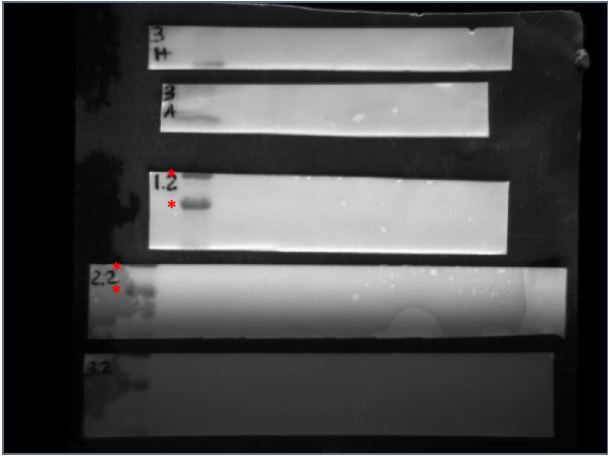

Red stars indicate the bands of the molecular marker at 50 KDa (upper) and 37 KDa (lower)

Uncropped image of GAPDH

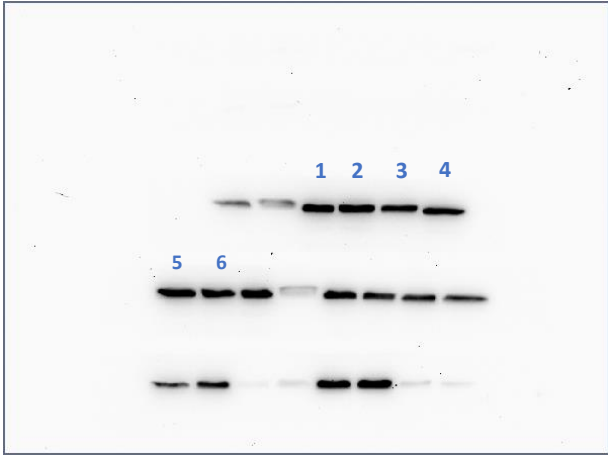

Blue numbers indicate the analyzed bands for GAPDH protein quantification (predicted MW 37 KDa)
